# Supplementary material for: Mikan Genome Database (MiGD): integrated database of genome annotation, genomic diversity, and CAPS marker information for mandarin molecular breeding
Source: PubMed Central journal article supplement — Breed Sci. 2020 Mar 5;70(2):200–11. doi: 10.1270/jsbbs.19097 (PMC7272249; doi:10.1270/jsbbs.19097), 2020-03-05
Supplement: 70_200_s1.pdf [file 70_200_s1.pdf]

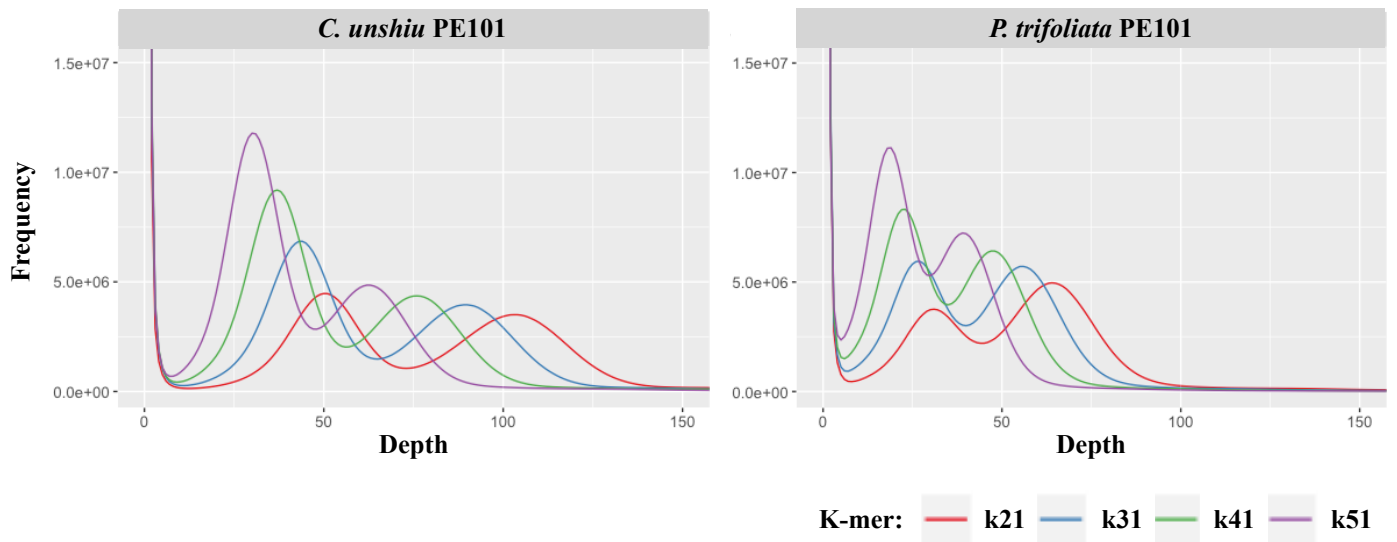

Supplemental Fig. 1. *k*-mer frequency distribution for paired-end reads of *C. unshiu* and *P. trifoliata*.

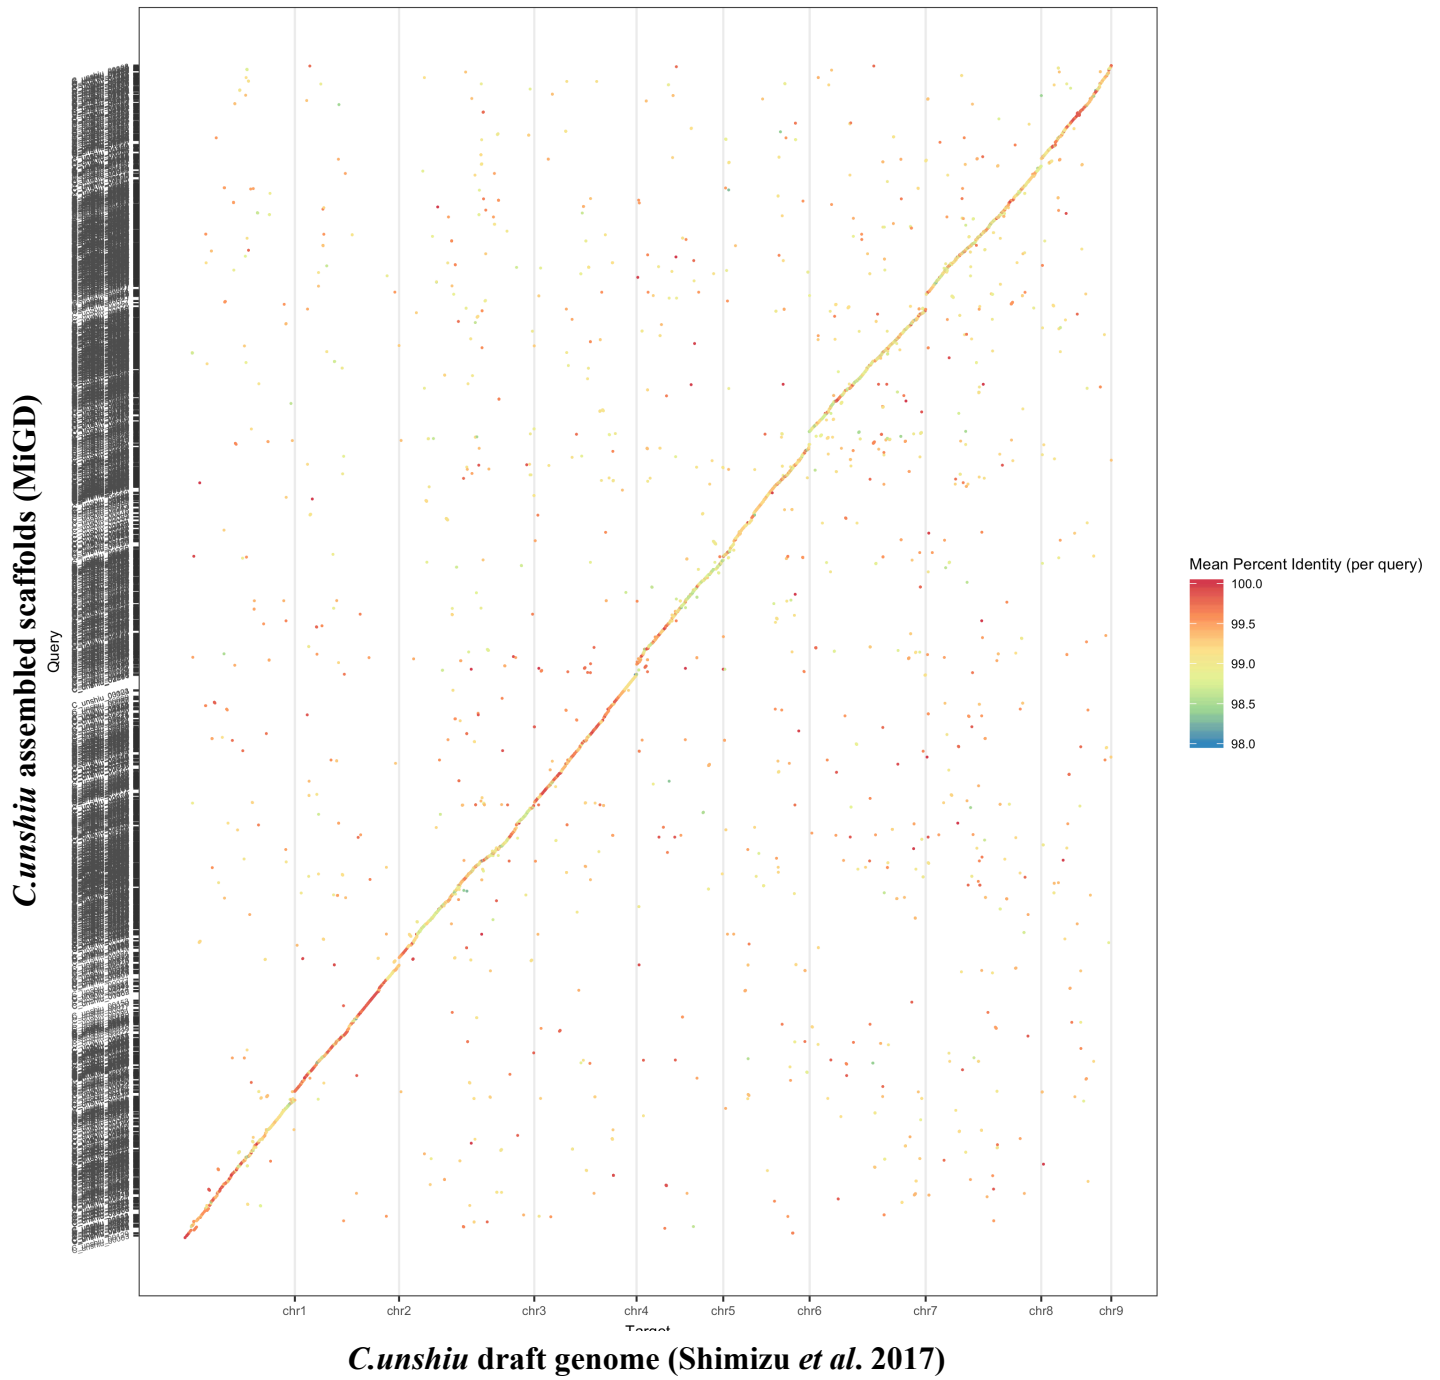

**Supplemental Fig. 2.** Dot plot of the published *C. unshiu* draft genome (Shimizu *et al.* 2017, only chr1-9) and assembled scaffolds in this study (MiGD).
