# Supplementary material for: Mikan Genome Database (MiGD): integrated database of genome annotation, genomic diversity, and CAPS marker information for mandarin molecular breeding
Source: PubMed Central journal article supplement — Breed Sci. 2020 Mar 5;70(2):200–11. doi: 10.1270/jsbbs.19097 (PMC7272249; doi:10.1270/jsbbs.19097), 2020-03-05
Supplement: 70_200_s2.pdf [file 70_200_s2.pdf]

Supplemental Table 1. Positions of DNA markers on the *C. clementina* genome, the integrated genetic map and the assembled scaffolds

| <i>C. clementina</i> (Phytozome, v1.0) |            |            | Integrated map (AGI map) |               | <i>C. unshiu</i> (this study) |                |           |           |                  |
|----------------------------------------|------------|------------|--------------------------|---------------|-------------------------------|----------------|-----------|-----------|------------------|
| Locus Name                             | Scaffold   | Start      | End                      | Linkage group | cM                            | Scaffold       | Start     | End       | Consistency with |
| Tf0045                                 | scaffold_4 | 23,496,020 | 23,497,466               | AGI-07        | 74.573                        | C_unshiu_00001 | 490,711   | 491,786   | Both             |
| Af1509                                 | scaffold_4 | 23,564,789 | 23,568,956               | AGI-07        | 73.796                        | C_unshiu_00001 | 558,108   | 560,075   |                  |
| Cp0452                                 | scaffold_4 | 23,575,399 | 23,582,495               | AGI-07        | 75.35                         | C_unshiu_00001 | 567,123   | 568,065   |                  |
| Cp0093                                 | scaffold_4 | 23,596,434 | 23,599,906               | AGI-07        | 74.537                        | C_unshiu_00001 | 587,977   | 589,347   |                  |
| Gn0048                                 | scaffold_4 | 23,695,766 | 23,697,703               | AGI-07        | 74.225                        | C_unshiu_00001 | 685,688   | 686,789   |                  |
| Tf0424                                 | scaffold_4 | 23,908,189 | 23,912,723               | AGI-07        | 77.041                        | C_unshiu_00001 | 907,580   | 908,165   |                  |
| Af1690                                 | scaffold_4 | 23,923,757 | 23,925,178               | AGI-07        | 77.752                        | C_unshiu_00001 | 920,608   | 921,584   |                  |
| Tf0094                                 | scaffold_4 | 23,957,038 | 23,959,134               | AGI-07        | 77.141                        | C_unshiu_00001 | 951,456   | 952,015   |                  |
| Gm0m22                                 | scaffold_4 | 24,041,593 | 24,043,549               | AGI-07        | 78.469                        | C_unshiu_00001 | 1,038,798 | 1,039,530 |                  |
| Cp0089                                 | scaffold_4 | 24,154,856 | 24,157,188               | AGI-07        | 77.194                        | C_unshiu_00001 | 1,160,329 | 1,161,357 |                  |
| Cp0057                                 | scaffold_4 | 24,227,703 | 24,230,754               | AGI-07        | 79.269                        | C_unshiu_00001 | 1,246,657 | 1,247,351 |                  |
| Af3017                                 | scaffold_4 | 24,401,841 | 24,406,470               | AGI-07        | 83.217                        | C_unshiu_00001 | 1,416,058 | 1,416,811 |                  |
| Wy0011                                 | scaffold_4 | 24,417,602 | 24,419,019               | AGI-07        | 86.288                        | C_unshiu_00001 | 1,429,949 | 1,431,367 |                  |
| Bf1243                                 | scaffold_4 | 24,657,015 | 24,660,141               | AGI-07        | 84.114                        | C_unshiu_00001 | 1,665,821 | 1,666,404 |                  |
| Gn0071                                 | scaffold_4 | 25,506,446 | 25,511,133               | AGI-07        | 86.113                        | C_unshiu_00001 | 2,191,116 | 2,192,263 |                  |
| Cp0537                                 | scaffold_2 | 34,189,216 | 34,193,815               | AGI-06        | 25.93                         | C_unshiu_00002 | 547,170   | 547,660   | AGI              |
| Cp0190                                 | scaffold_3 | 18,648,426 | 18,650,443               | AGI-06        | 27.617                        | C_unshiu_00002 | 656,851   | 658,203   |                  |
| Mf0083                                 | scaffold_2 | 13,677,328 | 13,681,293               | AGI-06        | 39.963                        | C_unshiu_00002 | 901,812   | 902,153   |                  |
| Ov0109                                 | scaffold_9 | 30,513,333 | 30,517,676               | AGI-03        | 71.06                         | C_unshiu_00003 | 122,575   | 123,859   | AGI              |
| Tf0292                                 | scaffold_9 | 31,139,789 | 31,143,240               | AGI-03        | 77.793                        | C_unshiu_00003 | 709,366   | 711,033   |                  |
| Tf0022                                 | scaffold_3 | 5,360,113  | 5,362,918                | AGI-03        | 78.631                        | C_unshiu_00003 | 806,029   | 807,195   |                  |
| Fb0708                                 | scaffold_9 | 31,237,089 | 31,243,737               | AGI-03        | 74.195                        | C_unshiu_00003 | 806,972   | 808,932   |                  |
| Cp0336                                 | scaffold_9 | 31,244,440 | 31,250,356               | AGI-03        | 79.515                        | C_unshiu_00003 | 814,166   | 815,168   |                  |
| Af1495                                 | scaffold_4 | 22,523,092 | 22,528,307               | AGI-07        | 69.544                        | C_unshiu_00004 | 552,648   | 553,511   | -                |
| Al0014                                 | scaffold_1 | 1,070,373  | 1,072,218                | AGI-01        | 97.525                        | C_unshiu_00005 | 281,284   | 282,962   | Ccle             |
| Wy0055                                 | scaffold_1 | 1,478,172  | 1,484,977                | AGI-01        | 118.691                       | C_unshiu_00005 | 687,783   | 689,352   |                  |
| Af1223                                 | scaffold_1 | 1,687,894  | 1,690,412                | AGI-09        | 97.668                        | C_unshiu_00005 | 896,863   | 898,695   |                  |
| Tf0275                                 | scaffold_9 | 955,176    | 957,425                  | AGI-03        | 11.501                        | C_unshiu_00007 | 224,446   | 225,652   | Both             |
| Gm0m26                                 | scaffold_9 | 713,868    | 716,708                  | AGI-03        | 10.918                        | C_unshiu_00007 | 475,547   | 476,207   |                  |
| Cp0996                                 | scaffold_9 | 543,444    | 546,746                  | AGI-03        | 9.366                         | C_unshiu_00007 | 630,946   | 631,764   |                  |
| Bf0005                                 | scaffold_9 | 465,444    | 468,143                  | AGI-03        | 8.177                         | C_unshiu_00007 | 710,676   | 711,262   |                  |
| Tf0140                                 | scaffold_9 | 225,971    | 232,459                  | AGI-03        | 9.83                          | C_unshiu_00007 | 931,799   | 932,701   |                  |
| Ov0305                                 | scaffold_6 | 16,909,492 | 16,912,088               | AGI-08        | 88.433                        | C_unshiu_00008 | 368,050   | 369,290   | -                |
| Af1443                                 | scaffold_6 | 25,048,398 | 25,053,494               | AGI-04        | 33.808                        | C_unshiu_00009 | 17,215    | 18,626    | No               |
| Ov0513                                 | scaffold_6 | 25,349,417 | 25,351,949               | AGI-04        | 38.903                        | C_unshiu_00009 | 331,832   | 332,586   |                  |
| Vs0003                                 | scaffold_5 | 41,496,792 | 41,499,173               | AGI-09        | 35.312                        | C_unshiu_00009 | 676,965   | 677,847   |                  |
| Fb0219                                 | scaffold_4 | 21,153,791 | 21,158,006               | AGI-03        | 46.274                        | C_unshiu_00010 | 722,072   | 722,537   | Cele             |
| Tf0148                                 | scaffold_4 | 20,998,708 | 21,001,535               | AGI-07        | 64.812                        | C_unshiu_00010 | 870,292   | 872,101   |                  |
| Al0411                                 | scaffold_8 | 19,760,077 | 19,761,961               | AGI-08        | 40.857                        | C_unshiu_00011 | 188,776   | 189,626   | -                |
| Af1505                                 | scaffold_4 | 1,531,262  | 1,535,758                | AGI-07        | 12.283                        | C_unshiu_00012 | 704,476   | 705,492   | Both             |
| Cp0039                                 | scaffold_4 | 1,549,679  | 1,551,396                | AGI-07        | 11.882                        | C_unshiu_00012 | 722,999   | 723,626   |                  |
| Cp0675                                 | scaffold_4 | 20,294,240 | 20,301,426               | AGI-07        | 59.793                        | C_unshiu_00015 | 303,650   | 304,757   | -                |
| Cp0431                                 | scaffold_2 | 27,084,177 | 27,089,027               | AGI-06        | 60.66                         | C_unshiu_00017 | 250,885   | 252,630   | -                |
| Tf0279                                 | scaffold_3 | 49,031,441 | 49,035,202               | AGI-05        | 80.539                        | C_unshiu_00018 | 565,286   | 565,738   | -                |
| Tf0375                                 | scaffold_3 | 13,034,654 | 13,036,082               | AGI-05        | 40.558                        | C_unshiu_00020 | 527,679   | 528,700   | -                |
| Gn0065                                 | scaffold_3 | 4,449,051  | 4,458,861                | AGI-09        | 79.316                        | C_unshiu_00021 | 36,344    | 37,551    | No               |
| Lp0119                                 | scaffold_8 | 24,315,720 | 24,317,671               | AGI-08        | 8.544                         | C_unshiu_00021 | 426,032   | 427,454   |                  |
| Fb2130                                 | scaffold_8 | 24,341,129 | 24,344,795               | AGI-08        | 11.809                        | C_unshiu_00021 | 454,247   | 455,995   |                  |
| Cp2190                                 | scaffold_8 | 24,416,582 | 24,418,982               | AGI-08        | 13.78                         | C_unshiu_00021 | 526,929   | 527,458   |                  |
| Af1042                                 | scaffold_2 | 28,786,444 | 28,788,097               | AGI-06        | 55.7                          | C_unshiu_00022 | 55,237    | 56,448    | Both             |
| Af1312                                 | scaffold_2 | 29,022,433 | 29,030,537               | AGI-06        | 37.883                        | C_unshiu_00022 | 315,497   | 316,310   |                  |
| Tf0343                                 | scaffold_2 | 29,204,680 | 29,206,501               | AGI-06        | 44.393                        | C_unshiu_00022 | 489,329   | 490,041   |                  |
| Tf0370                                 | scaffold_3 | 47,121,093 | 47,124,518               | AGI-05        | 69.117                        | C_unshiu_00023 | 128,974   | 129,310   | Both             |
| Gm0m16                                 | scaffold_3 | 47,476,188 | 47,482,822               | AGI-05        | 73.007                        | C_unshiu_00023 | 481,053   | 481,672   |                  |
| Cp0297                                 | scaffold_8 | 2,134,223  | 2,138,606                | AGI-08        | 78.209                        | C_unshiu_00024 | 197,809   | 199,407   | Both             |
| Edw002                                 | scaffold_8 | 2,012,329  | 2,014,782                | AGI-08        | 77.72                         | C_unshiu_00024 | 335,762   | 336,907   |                  |
| Gn0049                                 | scaffold_8 | 1,604,460  | 1,606,311                | AGI-08        | 77.688                        | C_unshiu_00024 | 699,820   | 700,620   |                  |
| Tf0357                                 | scaffold_7 | 2,246,732  | 2,249,558                | AGI-02        | 71.294                        | C_unshiu_00025 | 207,759   | 208,575   | Both             |
| Tf0020                                 | scaffold_7 | 2,289,455  | 2,291,216                | AGI-02        | 71.294                        | C_unshiu_00025 | 258,627   | 259,827   |                  |
| Cp1085                                 | scaffold_7 | 2,390,010  | 2,391,658                | AGI-02        | 70.082                        | C_unshiu_00025 | 337,545   | 338,089   |                  |
| Vt0015                                 | scaffold_7 | 2,441,452  | 2,443,391                | AGI-02        | 70.082                        | C_unshiu_00025 | 381,952   | 382,562   |                  |
| Cp2263                                 | scaffold_7 | 2,586,384  | 2,588,513                | AGI-02        | 70.082                        | C_unshiu_00025 | 530,956   | 531,883   |                  |
| Cp1716                                 | scaffold_7 | 2,607,670  | 2,609,433                | AGI-02        | 70.068                        | C_unshiu_00025 | 553,330   | 554,298   |                  |
| Wy0005                                 | scaffold_3 | 48,337,105 | 48,339,028               | AGI-05        | 83.57                         | C_unshiu_00026 | 464,674   | 465,734   | -                |
| Af1693                                 | scaffold_2 | 32,069,149 | 32,072,079               | AGI-06        | 35.794                        | C_unshiu_00027 | 206,101   | 207,143   | -                |
| Af1086                                 | scaffold_4 | 10,510,018 | 10,517,939               | AGI-05        | 41.306                        | C_unshiu_00028 | 4,310     | 6,099     | -                |
| Al0422                                 | scaffold_6 | 14,495,473 | 14,496,662               | AGI-08        | 93.695                        | C_unshiu_00032 | 370,195   | 370,450   | -                |
| Ov0111                                 | scaffold_5 | 8,532,280  | 8,539,677                | AGI-09        | 85.81                         | C_unshiu_00033 | 57,879    | 59,374    | -                |
| Fb0373                                 | scaffold_5 | 6,404,463  | 6,435,349                | AGI-09        | 85.81                         | C_unshiu_00034 | 177,184   | 178,880   | -                |
| Gm0m19                                 | scaffold_6 | 21,450,811 | 21,454,133               | AGI-04        | 54.804                        | C_unshiu_00037 | 167,106   | 167,943   | No               |
| Tf0373                                 | scaffold_6 | 21,229,813 | 21,233,537               | AGI-04        | 61.716                        | C_unshiu_00037 | 389,998   | 390,878   |                  |
| Fb2159                                 | scaffold_3 | 39,606,431 | 39,608,387               | AGI-05        | 49.856                        | C_unshiu_00037 | 551,652   | 553,013   |                  |
| Bf0008                                 | scaffold_6 | 22,467,565 | 22,470,029               | AGI-04        | 47.391                        | C_unshiu_00038 | 41,286    | 43,202    | Both             |
| Al0304                                 | scaffold_6 | 22,616,979 | 22,619,271               | AGI-04        | 46.361                        | C_unshiu_00038 | 174,668   | 175,116   |                  |
| Af1600                                 | scaffold_6 | 22,758,027 | 22,760,875               | AGI-04        | 5.122                         | C_unshiu_00038 | 306,471   | 307,590   |                  |
| Af1059                                 | scaffold_6 | 23,066,384 | 23,072,168               | AGI-04        | 44.84                         | C_unshiu_00038 | 558,727   | 560,166   |                  |
| Cp1697                                 | scaffold_8 | 966,124    | 968,846                  | AGI-02        | 73.77                         | C_unshiu_00041 | 557,086   | 557,618   | Cele             |
| Tf0356                                 | scaffold_8 | 998,289    | 1,001,763                | AGI-08        | 83.743                        | C_unshiu_00041 | 590,892   | 591,550   |                  |
| Fb0372                                 | scaffold_5 | 35,123,213 | 35,124,730               | AGI-09        | 59.896                        | C_unshiu_00042 | 237,033   | 238,267   | Both             |
| Tf0061                                 | scaffold_5 | 35,159,690 | 35,164,384               | AGI-09        | 61.651                        | C_unshiu_00042 | 271,812   | 272,173   |                  |
| Tf0151                                 | scaffold_5 | 35,357,333 | 35,359,897               | AGI-09        | 60.528                        | C_unshiu_00042 | 472,433   | 474,133   |                  |

|        |            |            |            |        |         |                |         |         |      |
|--------|------------|------------|------------|--------|---------|----------------|---------|---------|------|
| Ks9010 | scaffold_9 | 29,460,866 | 29,463,385 | AGI-04 | 62.499  | C_unshiu_00043 | 426,268 | 427,863 | -    |
| Tf0074 | scaffold_9 | 28,444,512 | 28,446,074 | AGI-03 | 37.816  | C_unshiu_00045 | 62,979  | 63,720  | Both |
| Tf0072 | scaffold_9 | 28,757,274 | 28,759,075 | AGI-03 | 35.962  | C_unshiu_00045 | 373,116 | 373,665 |      |
| Afl638 | scaffold_9 | 28,984,972 | 28,989,373 | AGI-03 | 34.554  | C_unshiu_00045 | 560,403 | 561,749 |      |
| Cp0813 | scaffold_6 | 20,638,049 | 20,641,557 | AGI-04 | 58.655  | C_unshiu_00046 | 408,491 | 409,216 | -    |
| Afl467 | scaffold_1 | 24,171,632 | 24,175,378 | AGI-01 | 29.784  | C_unshiu_00047 | 118,956 | 119,898 | Both |
| Tf0049 | scaffold_1 | 24,273,993 | 24,277,800 | AGI-01 | 26.841  | C_unshiu_00047 | 218,517 | 220,089 |      |
| Ks9001 | scaffold_1 | 24,548,109 | 24,552,107 | AGI-01 | 27.192  | C_unshiu_00047 | 477,883 | 478,968 |      |
| If0003 | scaffold_2 | 35,470,078 | 35,472,862 | AGI-06 | 18.136  | C_unshiu_00048 | 64,959  | 66,568  | Both |
| Bf0028 | scaffold_2 | 35,354,776 | 35,363,026 | AGI-06 | 17.966  | C_unshiu_00048 | 179,984 | 181,820 |      |
| AI0417 | scaffold_2 | 35,212,691 | 35,214,865 | AGI-06 | 20.297  | C_unshiu_00048 | 328,582 | 330,136 |      |
| Afl580 | scaffold_2 | 35,013,848 | 35,015,439 | AGI-06 | 20.932  | C_unshiu_00048 | 513,216 | 514,355 |      |
| Tf0166 | scaffold_5 | 19,682,579 | 19,686,163 | AGI-09 | 101.351 | C_unshiu_00050 | 141,896 | 142,233 | Both |
| Tf0130 | scaffold_5 | 19,740,133 | 19,745,806 | AGI-09 | 103.217 | C_unshiu_00050 | 198,783 | 199,112 |      |
| Bf0128 | scaffold_7 | 3,323,269  | 3,331,038  | AGI-02 | 70.082  | C_unshiu_00051 | 38,943  | 39,935  | No   |
| Cp1925 | scaffold_9 | 3,115,971  | 3,120,271  | AGI-03 | 24.457  | C_unshiu_00051 | 228,296 | 228,896 |      |
| Lp0202 | scaffold_9 | 3,131,006  | 3,134,438  | AGI-03 | 23.085  | C_unshiu_00051 | 241,738 | 243,679 |      |
| Fb1227 | scaffold_9 | 3,367,718  | 3,376,062  | AGI-03 | 19.631  | C_unshiu_00051 | 469,562 | 471,051 |      |
| Wy0029 | scaffold_6 | 21,145,703 | 21,148,279 | AGI-04 | NL      | C_unshiu_00052 | 161,077 | 161,927 | Both |
| Mf0092 | scaffold_6 | 21,137,783 | 21,142,157 | AGI-04 | 59.19   | C_unshiu_00052 | 170,821 | 172,514 |      |
| Lp0206 | scaffold_6 | 20,836,509 | 20,840,107 | AGI-04 | 58.655  | C_unshiu_00052 | 454,470 | 455,558 |      |
| Afl332 | scaffold_6 | 20,834,427 | 20,836,151 | AGI-04 | NL      | C_unshiu_00052 | 456,755 | 457,372 |      |
| Ov0126 | scaffold_3 | 46,814,909 | 46,817,474 | AGI-05 | 65.51   | C_unshiu_00053 | 477,837 | 479,079 | -    |
| Cp0741 | scaffold_1 | 3,746,178  | 3,749,903  | AGI-01 | 75.964  | C_unshiu_00055 | 169,374 | 170,461 | -    |
| Gn0014 | scaffold_9 | 29,488,658 | 29,491,181 | AGI-03 | 62.766  | C_unshiu_00056 | 145,017 | 146,016 | Both |
| Afl513 | scaffold_9 | 29,523,786 | 29,526,379 | AGI-03 | 63.545  | C_unshiu_00056 | 181,483 | 183,106 |      |
| Afl037 | scaffold_4 | 1,969,590  | 1,972,842  | AGI-04 | 50.972  | C_unshiu_00058 | 523,536 | 524,866 | -    |
| Afl437 | scaffold_5 | 1,474,396  | 1,479,079  | AGI-09 | 92.804  | C_unshiu_00060 | 311,863 | 313,148 | No   |
| Afl629 | scaffold_6 | 2,969,527  | 2,973,147  | AGI-07 | 39.42   | C_unshiu_00060 | 539,914 | 541,698 |      |
| Cp1044 | scaffold_2 | 4,351,560  | 4,358,516  | AGI-07 | 39.42   | C_unshiu_00062 | 331,767 | 332,798 | -    |
| AI0413 | scaffold_9 | 7,579,900  | 7,583,093  | AGI-03 | 46.197  | C_unshiu_00063 | 483,580 | 484,711 | -    |
| Lp0211 | scaffold_1 | 25,816,949 | 25,818,472 | AGI-01 | 30.175  | C_unshiu_00066 | 279,539 | 280,737 | Both |
| Afl094 | scaffold_1 | 25,761,570 | 25,764,926 | AGI-01 | 30.175  | C_unshiu_00066 | 336,004 | 336,463 |      |
| Afl084 | scaffold_1 | 25,716,862 | 25,720,071 | AGI-01 | 24.643  | C_unshiu_00066 | 379,523 | 381,328 |      |
| Mf0086 | scaffold_1 | 25,592,494 | 25,593,617 | AGI-01 | 26.428  | C_unshiu_00066 | 501,040 | 501,781 |      |
| Tf0042 | scaffold_2 | 9,338,651  | 9,341,271  | AGI-06 | 115.164 | C_unshiu_00067 | 86,126  | 86,389  | Both |
| Tf0455 | scaffold_2 | 9,338,651  | 9,341,271  | AGI-06 | 114.172 | C_unshiu_00067 | 86,373  | 88,305  |      |
| Bf0212 | scaffold_2 | 9,206,686  | 9,211,152  | AGI-06 | 117.593 | C_unshiu_00067 | 214,939 | 216,131 |      |
| Gn0053 | scaffold_2 | 32,481,549 | 32,484,643 | AGI-06 | 34.164  | C_unshiu_00070 | 263,677 | 265,167 | -    |
| Fb0478 | scaffold_1 | 14,592,248 | 14,596,429 | AGI-01 | 61.025  | C_unshiu_00071 | 199,548 | 200,609 | -    |
| Bf0161 | scaffold_2 | 6,658,003  | 6,660,691  | AGI-06 | 144.849 | C_unshiu_00072 | 364,391 | 364,898 | Both |
| Afl636 | scaffold_2 | 6,611,813  | 6,619,116  | AGI-06 | 150.228 | C_unshiu_00072 | 416,415 | 418,298 |      |
| Mf0033 | scaffold_1 | 6,227,617  | 6,228,389  | AGI-01 | 62.57   | C_unshiu_00075 | 123,835 | 124,523 | -    |
| Gn0073 | scaffold_2 | 35,895,662 | 35,898,841 | AGI-06 | 12.402  | C_unshiu_00077 | 30,776  | 32,166  | Both |
| Tf0330 | scaffold_2 | 35,970,577 | 35,973,973 | AGI-06 | 13.47   | C_unshiu_00077 | 102,694 | 103,353 |      |
| Afl499 | scaffold_6 | 21,905,557 | 21,908,832 | AGI-04 | 0       | C_unshiu_00079 | 273,085 | 274,198 | Both |
| Afl508 | scaffold_6 | 21,983,044 | 21,991,500 | AGI-04 | 1.342   | C_unshiu_00079 | 329,490 | 331,054 |      |
| AI0636 | scaffold_1 | 23,776,796 | 23,782,088 | AGI-01 | 27.489  | C_unshiu_00080 | 468,254 | 469,451 | Both |
| Afl554 | scaffold_1 | 23,753,759 | 23,756,754 | AGI-01 | 28.775  | C_unshiu_00080 | 491,880 | 492,725 |      |
| Ov0403 | scaffold_2 | 23,891,814 | 23,893,095 | AGI-06 | 61.779  | C_unshiu_00081 | 296,860 | 297,758 | -    |
| Gn0068 | scaffold_7 | 3,222,483  | 3,228,894  | AGI-02 | 68.446  | C_unshiu_00084 | 140,717 | 141,945 | Both |
| Bf0405 | scaffold_7 | 2,994,525  | 3,001,770  | AGI-02 | 69.342  | C_unshiu_00084 | 366,700 | 367,454 |      |
| Fb0227 | scaffold_7 | 2,938,059  | 2,940,407  | AGI-02 | 70.082  | C_unshiu_00084 | 428,713 | 430,325 |      |
| Fb0234 | scaffold_4 | 16,176,836 | 16,178,421 | AGI-07 | 45.424  | C_unshiu_00086 | 53,636  | 54,213  | Both |
| Gn0040 | scaffold_4 | 16,232,756 | 16,233,365 | AGI-07 | 43.542  | C_unshiu_00086 | 100,164 | 101,390 |      |
| Wy0008 | scaffold_1 | 9,297,360  | 9,299,641  | AGI-01 | 57.863  | C_unshiu_00087 | 41,568  | 42,839  | -    |
| Cp0895 | scaffold_6 | 19,241,700 | 19,246,874 | AGI-04 | 67.375  | C_unshiu_00089 | 11,400  | 13,234  | Both |
| Tf0075 | scaffold_6 | 19,142,307 | 19,156,510 | AGI-04 | 66.455  | C_unshiu_00089 | 107,947 | 109,800 |      |
| Ov0117 | scaffold_6 | 19,105,139 | 19,113,780 | AGI-04 | 66.455  | C_unshiu_00089 | 153,747 | 154,762 |      |
| Bf0130 | scaffold_9 | 26,981,498 | 26,984,277 | AGI-03 | 40.452  | C_unshiu_00095 | 228,452 | 229,093 | -    |
| Tf0016 | scaffold_5 | 39,839,984 | 39,841,860 | AGI-09 | 42.158  | C_unshiu_00096 | 53,083  | 53,354  | Both |
| Cp1143 | scaffold_5 | 39,858,531 | 39,862,402 | AGI-09 | 42.158  | C_unshiu_00096 | 71,188  | 71,909  |      |
| Fb2156 | scaffold_5 | 39,992,234 | 39,996,269 | AGI-09 | 41.254  | C_unshiu_00096 | 200,685 | 202,198 |      |
| Afl639 | scaffold_6 | 23,462,487 | 23,466,580 | AGI-04 | 6.635   | C_unshiu_00098 | 241,233 | 242,665 | Both |
| Cp2026 | scaffold_6 | 23,506,491 | 23,509,585 | AGI-04 | 43.239  | C_unshiu_00098 | 286,118 | 286,855 |      |
| Tf0386 | scaffold_6 | 23,593,516 | 23,595,492 | AGI-04 | 41.367  | C_unshiu_00098 | 371,696 | 372,165 |      |
| Tf0397 | scaffold_6 | 23,657,256 | 23,657,810 | AGI-04 | 40.646  | C_unshiu_00098 | 442,120 | 442,684 |      |
| Mf0010 | scaffold_4 | 19,467,669 | 19,468,803 | AGI-07 | 55.503  | C_unshiu_00099 | 12,955  | 13,358  | Both |
| Tf0165 | scaffold_4 | 19,605,473 | 19,608,059 | AGI-07 | 55.503  | C_unshiu_00099 | 154,647 | 155,729 |      |
| Tf0337 | scaffold_4 | 19,635,415 | 19,637,061 | AGI-07 | 54.869  | C_unshiu_00099 | 187,602 | 187,966 |      |
| Afl116 | scaffold_5 | 6,749,024  | 6,753,178  | AGI-09 | 85.81   | C_unshiu_00100 | 361,605 | 362,773 | -    |
| Ov0027 | scaffold_9 | 4,167,809  | 4,176,655  | AGI-03 | 51.749  | C_unshiu_00101 | 224,852 | 225,785 | Both |
| Bf0171 | scaffold_9 | 4,116,356  | 4,117,315  | AGI-03 | 52.548  | C_unshiu_00101 | 280,924 | 281,286 |      |
| Fb0103 | scaffold_1 | 22,758,712 | 22,761,740 | AGI-01 | 30.703  | C_unshiu_00103 | 161,551 | 162,888 | Both |
| Bf0036 | scaffold_1 | 22,840,947 | 22,844,111 | AGI-01 | 29.144  | C_unshiu_00103 | 248,922 | 250,342 |      |
| Bf1207 | scaffold_1 | 22,912,695 | 22,913,798 | AGI-01 | 0       | C_unshiu_00103 | 319,604 | 319,898 |      |
| Tf0163 | scaffold_1 | 26,740,822 | 26,744,016 | AGI-01 | 31.24   | C_unshiu_00105 | 318,410 | 319,407 | -    |
| Tf0264 | scaffold_2 | 248,256    | 250,675    | AGI-06 | 103.728 | C_unshiu_00109 | 177,451 | 178,250 | -    |
| Tf0093 | scaffold_5 | 29,413,143 | 29,414,562 | AGI-09 | 86.512  | C_unshiu_00110 | 149,626 | 150,535 | -    |
| Cp2118 | scaffold_4 | 14,565,456 | 14,568,265 | AGI-07 | 37.152  | C_unshiu_00113 | 170,038 | 171,826 | -    |
| Tf0423 | scaffold_9 | 25,662,049 | 25,666,791 | AGI-03 | 50.361  | C_unshiu_00115 | 251,184 | 251,787 | Both |
| Tf0219 | scaffold_9 | 25,662,049 | 25,666,791 | AGI-03 | 49.25   | C_unshiu_00115 | 251,188 | 251,783 |      |
| Af0016 | scaffold_3 | 25,074,163 | 25,075,916 | AGI-05 | 41.306  | C_unshiu_00117 | 40,256  | 40,631  | -    |
| Bf0020 | scaffold_9 | 25,185,200 | 25,188,839 | AGI-03 | 47.887  | C_unshiu_00119 | 238,085 | 239,504 | Both |

|        |            |            |            |        |         |                |         |         |      |
|--------|------------|------------|------------|--------|---------|----------------|---------|---------|------|
| AI0302 | scaffold_9 | 25,073,693 | 25,080,376 | AGI-03 | 48.375  | C_unshiu_00119 | 350,849 | 352,545 |      |
| Bf0174 | scaffold_3 | 3,551,542  | 3,555,978  | AGI-05 | 25.049  | C_unshiu_00120 | 130,241 | 131,343 | -    |
| Bf0229 | scaffold_9 | 17,242,218 | 17,245,901 | AGI-03 | 46.274  | C_unshiu_00122 | 121,017 | 122,133 | -    |
| Bf1185 | scaffold_5 | 40,993,520 | 40,993,992 | AGI-09 | 0       | C_unshiu_00123 | 323,241 | 324,182 | -    |
| Af1645 | scaffold_5 | 2,472,805  | 2,477,375  | AGI-09 | 90.878  | C_unshiu_00127 | 54,533  | 55,594  | Both |
| Tf0088 | scaffold_5 | 41,275,201 | 41,278,829 | AGI-09 | 35.763  | C_unshiu_00127 | 253,241 | 254,348 |      |
| Bf0412 | scaffold_8 | 19,553,342 | 19,555,401 | AGI-08 | 29.534  | C_unshiu_00130 | 207,763 | 208,561 | No   |
| Mf0097 | scaffold_6 | 16,712,914 | 16,716,984 | AGI-07 | 44.663  | C_unshiu_00130 | 309,938 | 310,327 |      |
| AI0407 | scaffold_1 | 26,576,059 | 26,578,193 | AGI-01 | 31.24   | C_unshiu_00131 | 121,249 | 122,922 | -    |
| Gn0051 | scaffold_6 | 24,082,263 | 24,084,635 | AGI-04 | 39.51   | C_unshiu_00133 | 63,717  | 64,692  | Both |
| Af1462 | scaffold_6 | 24,274,031 | 24,276,658 | AGI-04 | 37.527  | C_unshiu_00133 | 274,321 | 275,936 |      |
| Tf0143 | scaffold_9 | 30,040,457 | 30,044,615 | AGI-03 | 68.846  | C_unshiu_00134 | 204,010 | 204,675 | -    |
| Tf0050 | scaffold_6 | 24,874,840 | 24,876,388 | AGI-04 | 36.106  | C_unshiu_00135 | 84,951  | 85,708  | Both |
| Tf0364 | scaffold_6 | 24,606,501 | 24,612,654 | AGI-04 | 37.102  | C_unshiu_00135 | 341,494 | 342,404 |      |
| Af1700 | scaffold_9 | 18,502,293 | 18,505,531 | AGI-03 | 54.06   | C_unshiu_00138 | 182,955 | 183,933 | -    |
| AI0625 | scaffold_6 | 18,572,061 | 18,576,303 | AGI-04 | 66.455  | C_unshiu_00139 | 348,927 | 350,093 | -    |
| Ov0412 | scaffold_2 | 31,036,088 | 31,038,222 | AGI-06 | 42.11   | C_unshiu_00143 | 67,883  | 68,997  | -    |
| Wy0003 | scaffold_5 | 37,189,653 | 37,192,231 | AGI-09 | 46.823  | C_unshiu_00144 | 215,311 | 216,515 | -    |
| Af1456 | scaffold_9 | 6,354,796  | 6,356,630  | AGI-03 | 46.298  | C_unshiu_00146 | 205,349 | 206,729 | -    |
| Tf0268 | scaffold_3 | 10,140,904 | 10,142,752 | AGI-05 | 43.8    | C_unshiu_00149 | 326,584 | 327,190 | -    |
| Fb0143 | scaffold_1 | 25,283,807 | 25,291,472 | AGI-01 | 26.176  | C_unshiu_00150 | 325,311 | 326,409 | -    |
| Gn0031 | scaffold_4 | 17,365,402 | 17,366,484 | AGI-08 | 37.706  | C_unshiu_00151 | 365,810 | 366,947 | -    |
| Lp0226 | scaffold_8 | 2,831,832  | 2,837,109  | AGI-08 | 73.527  | C_unshiu_00152 | 139,461 | 141,368 | Both |
| Tf0250 | scaffold_8 | 2,697,793  | 2,701,440  | AGI-08 | 73.105  | C_unshiu_00152 | 254,759 | 256,332 |      |
| AI0515 | scaffold_8 | 2,673,135  | 2,674,232  | AGI-08 | 73.663  | C_unshiu_00152 | 273,828 | 274,991 |      |
| Lg2004 | scaffold_8 | 2,646,458  | 2,649,562  | AGI-08 | 76.045  | C_unshiu_00152 | 348,106 | 349,243 |      |
| Tf0004 | scaffold_2 | 33,074,821 | 33,084,014 | AGI-06 | 32.312  | C_unshiu_00153 | 67,547  | 68,409  | -    |
| Tf0376 | scaffold_3 | 8,528,292  | 8,529,236  | AGI-05 | 41.853  | C_unshiu_00154 | 10,162  | 10,686  | Both |
| Bf0177 | scaffold_3 | 8,186,689  | 8,189,902  | AGI-05 | 44.047  | C_unshiu_00154 | 343,665 | 344,572 |      |
| Mf0072 | scaffold_6 | 13,750,671 | 13,752,605 | AGI-04 | 91.104  | C_unshiu_00155 | 18,139  | 18,920  | -    |
| Bf0145 | scaffold_8 | 22,730,839 | 22,737,521 | AGI-08 | 20.703  | C_unshiu_00158 | 107,529 | 109,166 | -    |
| Lp0143 | scaffold_3 | 6,076,949  | 6,080,875  | AGI-05 | 45.297  | C_unshiu_00159 | 341,699 | 343,498 | -    |
| Cp1034 | scaffold_9 | 21,107,894 | 21,109,919 | AGI-03 | 46.76   | C_unshiu_00160 | 183,039 | 184,304 | -    |
| Cp1500 | scaffold_9 | 7,080,249  | 7,086,989  | AGI-03 | 46.274  | C_unshiu_00161 | 150,860 | 152,352 | -    |
| Af1253 | scaffold_3 | 3,201,206  | 3,204,377  | AGI-05 | 24.709  | C_unshiu_00163 | 212,154 | 212,640 | -    |
| Af3822 | scaffold_9 | 5,493,708  | 5,497,030  | AGI-03 | 44.864  | C_unshiu_00164 | 74,182  | 74,890  | -    |
| Tf0410 | scaffold_4 | 213,798    | 215,848    | AGI-07 | 6.146   | C_unshiu_00168 | 273,686 | 274,620 | -    |
| Mf0094 | scaffold_7 | 3,721,375  | 3,722,616  | AGI-02 | 67.666  | C_unshiu_00169 | 218,021 | 218,949 | Both |
| Tf0259 | scaffold_7 | 3,674,156  | 3,676,384  | AGI-02 | 67.666  | C_unshiu_00169 | 262,902 | 263,161 |      |
| Tf0117 | scaffold_9 | 15,107,375 | 15,113,804 | AGI-03 | 46.274  | C_unshiu_00170 | 96,250  | 96,998  | -    |
| Af1111 | scaffold_2 | 23,021,193 | 23,023,457 | AGI-06 | 83.445  | C_unshiu_00172 | 271,384 | 271,950 | -    |
| Tf0085 | scaffold_6 | 2,067,586  | 2,073,007  | AGI-08 | 96.807  | C_unshiu_00176 | 90,695  | 92,474  | -    |
| CTV102 | scaffold_7 | 13,302,657 | 13,305,335 | AGI-02 | 14.399  | C_unshiu_00181 | 310,108 | 311,973 |      |
| Tf0069 | scaffold_5 | 38,566,192 | 38,571,337 | AGI-09 | 42.789  | C_unshiu_00183 | 20,156  | 20,932  | AGI  |
| If0211 | scaffold_8 | 6,632,695  | 6,643,448  | AGI-09 | 47.41   | C_unshiu_00183 | 68,913  | 69,535  |      |
| Fb0138 | scaffold_5 | 38,499,024 | 38,504,883 | AGI-09 | 43.862  | C_unshiu_00183 | 90,751  | 91,859  |      |
| Cp1624 | scaffold_1 | 18,068,297 | 18,070,262 | AGI-01 | 58.42   | C_unshiu_00187 | 99,745  | 100,668 | Both |
| Af1622 | scaffold_1 | 18,117,264 | 18,119,451 | AGI-01 | 54.754  | C_unshiu_00187 | 142,514 | 143,656 |      |
| Tf0066 | scaffold_1 | 18,270,818 | 18,273,015 | AGI-01 | 58.42   | C_unshiu_00187 | 287,622 | 288,187 |      |
| Af1109 | scaffold_3 | 8,352,177  | 8,358,299  | AGI-05 | 48.59   | C_unshiu_00194 | 96,553  | 97,633  | -    |
| Af1205 | scaffold_5 | 34,161,721 | 34,162,652 | AGI-09 | 64.754  | C_unshiu_00196 | 15,352  | 15,863  | -    |
| AI0635 | scaffold_2 | 26,435,540 | 26,438,838 | AGI-06 | 69.195  | C_unshiu_00197 | 251,225 | 253,064 | -    |
| Mf0017 | scaffold_3 | 7,337,405  | 7,339,222  | AGI-05 | 44.674  | C_unshiu_00199 | 77,315  | 78,999  | Both |
| Cp1268 | scaffold_3 | 7,327,436  | 7,329,167  | AGI-05 | 44.864  | C_unshiu_00199 | 87,565  | 88,383  |      |
| Gn0069 | scaffold_1 | 10,946,316 | 10,949,617 | AGI-01 | 57.863  | C_unshiu_00201 | 213,819 | 215,016 | -    |
| Cp0870 | scaffold_4 | 642,157    | 644,823    | AGI-07 | 5.18    | C_unshiu_00202 | 128,814 | 129,356 | -    |
| Fb0144 | scaffold_3 | 50,861,813 | 50,866,146 | AGI-05 | 107.806 | C_unshiu_00206 | 283,440 | 285,075 | -    |
| Tf0348 | scaffold_6 | 11,611,994 | 11,614,367 | AGI-08 | 96.565  | C_unshiu_00207 | 65,738  | 66,467  | Both |
| Tf0271 | scaffold_6 | 11,707,953 | 11,715,646 | AGI-08 | 95.613  | C_unshiu_00207 | 137,882 | 138,599 |      |
| Tf0062 | scaffold_6 | 11,826,472 | 11,830,875 | AGI-08 | 93.624  | C_unshiu_00207 | 254,189 | 255,068 |      |
| Af0015 | scaffold_3 | 44,021,779 | 44,027,536 | AGI-05 | 54.268  | C_unshiu_00217 | 86,727  | 87,041  | Both |
| Tf0068 | scaffold_3 | 44,141,518 | 44,144,453 | AGI-05 | 54.268  | C_unshiu_00217 | 203,542 | 204,669 |      |
| Mf0080 | scaffold_3 | 44,202,968 | 44,205,663 | AGI-05 | 55.049  | C_unshiu_00217 | 286,385 | 287,421 |      |
| Tf0405 | scaffold_8 | 6,025,802  | 6,031,497  | AGI-08 | 61.643  | C_unshiu_00220 | 49,497  | 49,996  | -    |
| Tf0235 | scaffold_4 | 17,057,658 | 17,074,755 | AGI-07 | 43.879  | C_unshiu_00225 | 93,216  | 93,850  | No   |
| AI0632 | scaffold_8 | 17,809,428 | 17,813,065 | AGI-08 | 56.724  | C_unshiu_00225 | 241,322 | 242,320 |      |
| If0207 | scaffold_9 | 11,285,949 | 11,287,038 | AGI-07 | 45.716  | C_unshiu_00231 | 259,735 | 260,705 | -    |
| Wy0059 | scaffold_6 | 8,562,431  | 8,564,865  | AGI-08 | 91.502  | C_unshiu_00232 | 292,601 | 294,599 | -    |
| If0208 | scaffold_5 | 40,628,244 | 40,630,241 | AGI-09 | 39.296  | C_unshiu_00234 | 98,362  | 98,906  | Both |
| Cp0506 | scaffold_5 | 40,832,603 | 40,834,625 | AGI-09 | 38.656  | C_unshiu_00234 | 284,229 | 284,664 |      |
| Lp0112 | scaffold_4 | 3,749,809  | 3,751,724  | AGI-07 | 19.603  | C_unshiu_00236 | 161,438 | 163,177 | -    |
| Cp0632 | scaffold_1 | 27,698,934 | 27,703,620 | AGI-08 | 56.724  | C_unshiu_00237 | 43,408  | 44,256  | Ccle |
| Tf0124 | scaffold_1 | 27,457,358 | 27,462,893 | AGI-01 | 34.062  | C_unshiu_00237 | 268,235 | 269,580 |      |
| Tf0318 | scaffold_4 | 13,751,433 | 13,754,767 | AGI-07 | 37.467  | C_unshiu_00240 | 284,043 | 284,621 | -    |
| Ov0322 | scaffold_5 | 36,398,988 | 36,399,239 | AGI-09 | 50.81   | C_unshiu_00241 | 39,704  | 40,744  | -    |
| Bf1192 | scaffold_1 | 10,678,653 | 10,684,627 | AGI-01 | 57.863  | C_unshiu_00242 | 105,122 | 105,571 | -    |
| Mf0070 | scaffold_2 | 3,067,337  | 3,069,249  | AGI-07 | 36.616  | C_unshiu_00246 | 68,347  | 69,894  | -    |
| Af1487 | scaffold_8 | 18,155,481 | 18,157,658 | AGI-08 | 47.33   | C_unshiu_00251 | 205,895 | 206,852 | -    |
| Tf0254 | scaffold_6 | 23,916,876 | 23,939,827 | AGI-04 | 38.226  | C_unshiu_00253 | 15,529  | 16,146  | -    |
| Cp1162 | scaffold_5 | 35,908,181 | 35,912,917 | AGI-09 | 53.232  | C_unshiu_00255 | 260,283 | 262,023 | -    |
| Af1056 | scaffold_2 | 26,595,972 | 26,598,955 | AGI-06 | 66.32   | C_unshiu_00262 | 85,900  | 87,001  | No   |
| Bf1182 | scaffold_3 | 45,731,067 | 45,735,238 | AGI-03 | 56.391  | C_unshiu_00262 | 95,724  | 96,369  |      |
| Tf0014 | scaffold_8 | 24,976,315 | 24,979,483 | AGI-08 | 0       | C_unshiu_00271 | 58,603  | 59,366  | -    |
| Cp0160 | scaffold_3 | 21,940,551 | 21,944,032 | AGI-05 | 41.267  | C_unshiu_00272 | 188,220 | 190,021 | -    |

|        |            |            |            |        |         |                |         |         |      |
|--------|------------|------------|------------|--------|---------|----------------|---------|---------|------|
| Cp0278 | scaffold_3 | 24,750,794 | 24,752,907 | AGI-04 | 122.142 | C_unshiu_00286 | 79,687  | 81,226  | Ccle |
| Af1087 | scaffold_3 | 24,796,351 | 24,800,588 | AGI-05 | 41.306  | C_unshiu_00286 | 133,319 | 134,005 |      |
| Tf0315 | scaffold_6 | 14,087,181 | 14,090,115 | AGI-08 | 93.657  | C_unshiu_00287 | 221,927 | 222,232 | -    |
| Af0004 | scaffold_7 | 8,447,414  | 8,453,714  | AGI-02 | 2.847   | C_unshiu_00290 | 87,073  | 88,766  | Both |
| Bf0142 | scaffold_7 | 8,508,837  | 8,516,759  | AGI-02 | 5.104   | C_unshiu_00290 | 152,070 | 153,816 |      |
| Cp1111 | scaffold_7 | 8,603,450  | 8,610,239  | AGI-02 | 5.054   | C_unshiu_00290 | 246,496 | 248,012 |      |
| Af1470 | scaffold_3 | 46,380,264 | 46,381,057 | AGI-05 | 62.767  | C_unshiu_00291 | 69,166  | 69,821  | -    |
| Bf0413 | scaffold_1 | 20,039,959 | 20,042,536 | AGI-09 | 86.996  | C_unshiu_00293 | 233,618 | 234,624 | -    |
| Af1017 | scaffold_9 | 22,671,554 | 22,672,639 | AGI-03 | 46.274  | C_unshiu_00295 | 151,052 | 151,649 | Both |
| Gn0067 | scaffold_9 | 22,728,310 | 22,730,086 | AGI-03 | 46.274  | C_unshiu_00295 | 207,963 | 208,499 |      |
| Af1379 | scaffold_7 | 3,456,105  | 3,460,607  | AGI-02 | 68.467  | C_unshiu_00301 | 135,100 | 136,428 | -    |
| AI0029 | scaffold_1 | 28,607,325 | 28,610,917 | AGI-01 | 37.357  | C_unshiu_00305 | 69,728  | 70,794  | -    |
| Af1498 | scaffold_9 | 6,766,349  | 6,768,025  | AGI-03 | 46.274  | C_unshiu_00307 | 212,698 | 213,804 | -    |
| Tf0026 | scaffold_7 | 285,299    | 292,550    | AGI-02 | 78.531  | C_unshiu_00312 | 156,022 | 157,915 | -    |
| Tf0051 | scaffold_3 | 3,963,024  | 3,966,516  | AGI-05 | 25.59   | C_unshiu_00318 | 155,070 | 155,842 | -    |
| AI0324 | scaffold_6 | 18,188,139 | 18,189,060 | AGI-08 | 41.127  | C_unshiu_00320 | 12,866  | 14,002  | AGI  |
| Ov0125 | scaffold_8 | 20,352,232 | 20,354,410 | AGI-08 | 41.398  | C_unshiu_00320 | 87,170  | 88,393  |      |
| If0203 | scaffold_3 | 42,229,224 | 42,231,230 | AGI-05 | 51.293  | C_unshiu_00322 | 121,270 | 123,028 | -    |
| Cp1427 | scaffold_3 | 45,576,863 | 45,579,197 | AGI-05 | 58.917  | C_unshiu_00326 | 23,447  | 24,081  | -    |
| Af1685 | scaffold_3 | 40,086,985 | 40,089,114 | AGI-05 | 56.481  | C_unshiu_00335 | 77,066  | 77,527  | -    |
| Fb0104 | scaffold_2 | 35,758,546 | 35,760,859 | AGI-06 | 16.857  | C_unshiu_00337 | 135,274 | 136,613 | -    |
| Fb0237 | scaffold_1 | 23,487,200 | 23,497,316 | AGI-01 | 28.325  | C_unshiu_00338 | 142,832 | 144,302 | Both |
| Tf0406 | scaffold_1 | 23,463,843 | 23,470,911 | AGI-01 | 28.515  | C_unshiu_00338 | 167,017 | 168,735 |      |
| Tf0168 | scaffold_1 | 24,898,769 | 24,905,716 | AGI-01 | 25.752  | C_unshiu_00341 | 171,223 | 172,317 | -    |
| Fb0322 | scaffold_4 | 3,249,710  | 3,254,808  | AGI-07 | 14.58   | C_unshiu_00342 | 221,130 | 222,289 | -    |
| Tf0342 | scaffold_3 | 1,649,410  | 1,655,963  | AGI-05 | 5.51    | C_unshiu_00343 | 203,168 | 203,761 | Both |
| Mf0039 | scaffold_3 | 42,488,524 | 42,497,198 | AGI-05 | 5.51    | C_unshiu_00343 | 222,744 | 224,235 |      |
| Bf0033 | scaffold_1 | 27,204,998 | 27,211,059 | AGI-01 | 32.408  | C_unshiu_00347 | 170,516 | 172,232 | -    |
| Lp0105 | scaffold_7 | 786,995    | 788,306    | AGI-02 | 75.939  | C_unshiu_00353 | 92,160  | 93,157  | Both |
| Af1031 | scaffold_7 | 718,488    | 722,516    | AGI-02 | 76.168  | C_unshiu_00353 | 153,436 | 154,455 |      |
| Gn0101 | scaffold_7 | 662,560    | 667,420    | AGI-02 | 77.881  | C_unshiu_00353 | 203,291 | 204,312 |      |
| Cp1523 | scaffold_9 | 1,356,580  | 1,359,310  | AGI-03 | 12.606  | C_unshiu_00355 | 190,636 | 191,434 | -    |
| Tf0065 | scaffold_4 | 13,945,795 | 13,951,313 | AGI-07 | 41.876  | C_unshiu_00357 | 35,367  | 36,358  | -    |
| AI0517 | scaffold_8 | 2,572,439  | 2,574,295  | AGI-08 | 74.016  | C_unshiu_00363 | 6,442   | 7,480   | -    |
| AI0206 | scaffold_4 | 12,309,480 | 12,311,438 | AGI-07 | 38.565  | C_unshiu_00365 | 192,773 | 194,402 | -    |
| Wy0032 | scaffold_9 | 10,357,084 | 10,359,834 | AGI-03 | 46.121  | C_unshiu_00367 | 101,486 | 102,845 | -    |
| Fb0326 | scaffold_5 | 43,051,579 | 43,053,394 | AGI-09 | 8.959   | C_unshiu_00370 | 207,157 | 208,442 | -    |
| Fb0159 | scaffold_8 | 23,456,630 | 23,459,052 | AGI-08 | 13.499  | C_unshiu_00375 | 28,660  | 30,014  | -    |
| Vt0032 | scaffold_7 | 17,901,487 | 17,905,433 | AGI-02 | 25.601  | C_unshiu_00382 | 167,171 | 167,739 | -    |
| Tf0353 | scaffold_3 | 34,696,661 | 34,702,240 | AGI-08 | 53.069  | C_unshiu_00392 | 2,271   | 3,047   | -    |
| Fb0827 | scaffold_9 | 2,353,442  | 2,357,780  | AGI-03 | 19.017  | C_unshiu_00394 | 42,021  | 42,860  | -    |
| Tf0058 | scaffold_1 | 20,885,102 | 20,889,283 | AGI-01 | 46.623  | C_unshiu_00395 | 52,008  | 53,753  | -    |
| Af1091 | scaffold_3 | 43,316,046 | 43,317,909 | AGI-05 | 52.655  | C_unshiu_00411 | 11,742  | 12,943  | Ccle |
| Tf0256 | scaffold_3 | 43,420,187 | 43,422,432 | AGI-05 | 52.314  | C_unshiu_00411 | 117,111 | 117,990 |      |
| AI0319 | scaffold_3 | 43,447,942 | 43,449,920 | AGI-03 | 46.274  | C_unshiu_00411 | 144,013 | 145,548 |      |
| Tf0420 | scaffold_3 | 6,602,994  | 6,605,239  | AGI-05 | 37.103  | C_unshiu_00412 | 81,558  | 82,001  | -    |
| Mf0090 | scaffold_7 | 17,201,236 | 17,204,282 | AGI-02 | 25.869  | C_unshiu_00421 | 197,086 | 198,124 | AGI  |
| AI0329 | scaffold_9 | 30,486,453 | 30,489,765 | AGI-02 | 25.162  | C_unshiu_00421 | 197,239 | 197,885 |      |
| Bf0195 | scaffold_5 | 31,069,237 | 31,075,092 | AGI-09 | 74.076  | C_unshiu_00422 | 35,715  | 36,023  | -    |
| Af1036 | scaffold_3 | 7,016,831  | 7,019,863  | AGI-05 | 43.118  | C_unshiu_00425 | 65,652  | 67,086  | -    |
| Bf0136 | scaffold_4 | 15,056,834 | 15,058,632 | AGI-07 | 45.051  | C_unshiu_00428 | 119,979 | 120,983 | -    |
| Bf0182 | scaffold_1 | 17,831,333 | 17,834,889 | AGI-01 | 47.439  | C_unshiu_00429 | 91,081  | 92,192  | -    |
| Tf0360 | scaffold_5 | 38,669,123 | 38,672,110 | AGI-09 | 43.14   | C_unshiu_00430 | 100,044 | 100,958 | -    |
| Wy0018 | scaffold_3 | 5,318,874  | 5,321,054  | AGI-05 | 29.033  | C_unshiu_00442 | 123,621 | 124,739 | Both |
| Tf0017 | scaffold_3 | 5,360,113  | 5,362,918  | AGI-05 | 28.617  | C_unshiu_00442 | 163,934 | 165,575 |      |
| Gn0050 | scaffold_3 | 5,382,490  | 5,385,009  | AGI-05 | 29.035  | C_unshiu_00442 | 186,245 | 186,919 |      |
| AI0326 | scaffold_3 | 6,409,311  | 6,411,254  | AGI-05 | 42.609  | C_unshiu_00443 | 62,633  | 63,257  | -    |
| Ov0118 | scaffold_5 | 34,294,853 | 34,297,359 | AGI-04 | 34.838  | C_unshiu_00447 | 119,859 | 121,521 | -    |
| Tf0059 | scaffold_1 | 12,883,722 | 12,897,805 | AGI-01 | 56.416  | C_unshiu_00450 | 56,639  | 58,365  | -    |
| Af1100 | scaffold_7 | 10,853,487 | 10,855,215 | AGI-02 | 13.326  | C_unshiu_00451 | 121,001 | 121,936 | -    |
| Cp0249 | scaffold_5 | 39,480,647 | 39,484,776 | AGI-09 | 41.336  | C_unshiu_00457 | 97,421  | 98,863  | -    |
| Wy0039 | scaffold_8 | 18,824,262 | 18,825,514 | AGI-08 | 45.276  | C_unshiu_00459 | 34,579  | 35,269  | -    |
| Cp1279 | scaffold_4 | 12,900,777 | 12,903,692 | AGI-07 | 40.184  | C_unshiu_00461 | 145,032 | 146,473 | -    |
| Fb0301 | scaffold_2 | 14,143,537 | 14,146,003 | AGI-06 | 92.727  | C_unshiu_00466 | 14,015  | 15,443  | -    |
| Vs0006 | scaffold_7 | 19,024,295 | 19,026,021 | AGI-02 | 27.491  | C_unshiu_00468 | 131,959 | 132,637 | -    |
| Tf0167 | scaffold_4 | 17,143,350 | 17,147,918 | AGI-07 | 46.244  | C_unshiu_00478 | 20,151  | 21,179  | -    |
| Tf0241 | scaffold_8 | 22,106,872 | 22,114,471 | AGI-08 | 27.618  | C_unshiu_00481 | 124,242 | 126,117 | -    |
| Cp0237 | scaffold_4 | 10,652,775 | 10,655,082 | AGI-07 | 35.506  | C_unshiu_00483 | 107,551 | 109,482 | -    |
| Tf0221 | scaffold_7 | 489,316    | 492,882    | AGI-02 | 81.212  | C_unshiu_00488 | 45,289  | 46,455  | -    |
| Tf0172 | scaffold_7 | 9,976,621  | 9,980,176  | AGI-02 | 10.638  | C_unshiu_00496 | 49,915  | 50,650  | -    |
| Tf0307 | scaffold_1 | 25,395,688 | 25,397,278 | AGI-01 | 23.266  | C_unshiu_00498 | 117,944 | 118,778 | -    |
| Tf0012 | scaffold_3 | 37,601,493 | 37,607,586 | AGI-05 | 47.173  | C_unshiu_00502 | 159,760 | 161,506 | -    |
| Af1052 | scaffold_9 | 12,808,154 | 12,820,311 | AGI-08 | 56.724  | C_unshiu_00508 | 48,148  | 48,924  | -    |
| Af1043 | scaffold_7 | 20,049,936 | 20,052,008 | AGI-02 | 44.231  | C_unshiu_00519 | 110,353 | 110,919 | -    |
| Tf0212 | scaffold_4 | 19,816,800 | 19,825,304 | AGI-07 | 56.586  | C_unshiu_00535 | 171,352 | 171,726 | -    |
| Fb0995 | scaffold_7 | 1,180,019  | 1,202,408  | AGI-02 | 74.555  | C_unshiu_00544 | 119,319 | 121,258 | -    |
| Tf0184 | scaffold_3 | 45,393,857 | 45,398,298 | AGI-05 | 57.948  | C_unshiu_00546 | 76,928  | 78,456  | Both |
| Tf0309 | scaffold_3 | 45,314,016 | 45,317,065 | AGI-05 | 57.948  | C_unshiu_00546 | 158,771 | 159,327 |      |
| Bf0011 | scaffold_1 | 4,722,889  | 4,726,339  | AGI-01 | 67.331  | C_unshiu_00547 | 55,517  | 57,448  | -    |
| Gn0064 | scaffold_3 | 29,351,854 | 29,354,190 | AGI-05 | 42.191  | C_unshiu_00549 | 41,263  | 41,832  | -    |
| Gnom29 | scaffold_5 | 12,677,414 | 12,680,761 | AGI-02 | 22.436  | C_unshiu_00578 | 77,792  | 78,245  | -    |
| Tf0001 | scaffold_3 | 8,647,529  | 8,652,282  | AGI-05 | 41.893  | C_unshiu_00580 | 77,227  | 77,872  | -    |
| Tf0077 | scaffold_1 | 28,433,972 | 28,437,921 | AGI-01 | 34.814  | C_unshiu_00590 | 86,517  | 87,927  | Both |
| Cp0671 | scaffold_1 | 28,353,948 | 28,356,507 | AGI-01 | 36.113  | C_unshiu_00590 | 165,804 | 167,371 |      |

|        |            |            |            |        |         |                |         |         |      |
|--------|------------|------------|------------|--------|---------|----------------|---------|---------|------|
| Af1568 | scaffold_1 | 28,821,463 | 28,827,153 | AGI-01 | 24,954  | C_unshiu_00591 | 110,268 | 110,642 | -    |
| AI0215 | scaffold_1 | 21,918,726 | 21,922,966 | AGI-01 | 38.255  | C_unshiu_00595 | 86,705  | 88,385  | -    |
| Vt0003 | scaffold_8 | 8,153,660  | 8,174,407  | AGI-08 | 56.724  | C_unshiu_00616 | 11,044  | 12,163  | AGI  |
| Gn0018 | scaffold_4 | 5,053,540  | 5,061,039  | AGI-08 | 84.345  | C_unshiu_00616 | 99,864  | 101,212 | -    |
| Fb0365 | scaffold_7 | 20,872,462 | 20,874,659 | AGI-02 | 31.596  | C_unshiu_00622 | 77,523  | 78,301  | -    |
| Bf0165 | scaffold_3 | 4,903,592  | 4,905,871  | AGI-05 | 29.035  | C_unshiu_00628 | 38,496  | 39,253  | -    |
| AI0026 | scaffold_6 | 6,694,890  | 6,696,619  | AGI-04 | 101.201 | C_unshiu_00631 | 155,608 | 157,516 | -    |
| Bf0415 | scaffold_8 | 18,363,676 | 18,367,862 | AGI-08 | 46.736  | C_unshiu_00643 | 117,495 | 118,250 | -    |
| AI0621 | scaffold_7 | 4,575,503  | 4,577,125  | AGI-02 | 60.566  | C_unshiu_00656 | 33,242  | 34,443  | -    |
| Cp0257 | scaffold_5 | 36,526,073 | 36,528,589 | AGI-09 | 48.39   | C_unshiu_00657 | 52,827  | 54,063  | -    |
| Cp0748 | scaffold_3 | 34,673,451 | 34,674,900 | AGI-01 | 33.562  | C_unshiu_00669 | 104,261 | 104,639 | -    |
| Bf0409 | scaffold_3 | 28,424,097 | 28,425,981 | AGI-08 | 57.386  | C_unshiu_00682 | 42,172  | 43,117  | AGI  |
| Tf0144 | scaffold_8 | 8,009,000  | 8,012,045  | AGI-08 | 56.439  | C_unshiu_00682 | 88,130  | 88,778  | -    |
| Tf0350 | scaffold_3 | 8,914,744  | 8,921,411  | AGI-05 | 43.295  | C_unshiu_00695 | 76,998  | 77,861  | -    |
| Tf0056 | scaffold_6 | 22,305,922 | 22,308,021 | AGI-04 | 49.225  | C_unshiu_00704 | 5,511   | 7,138   | -    |
| Bf0116 | scaffold_2 | 7,662,753  | 7,667,440  | AGI-06 | 133.8   | C_unshiu_00729 | 82,759  | 84,066  | -    |
| Tf0368 | scaffold_3 | 40,963,774 | 40,965,744 | AGI-05 | 48.59   | C_unshiu_00735 | 77,717  | 78,330  | Both |
| Cp0047 | scaffold_3 | 40,918,148 | 40,922,656 | AGI-05 | 48.59   | C_unshiu_00735 | 120,187 | 121,341 | -    |
| Af1593 | scaffold_2 | 27,738,397 | 27,741,912 | AGI-06 | 61.501  | C_unshiu_00745 | 83,918  | 85,526  | -    |
| Vt0011 | scaffold_3 | 12,984,411 | 12,986,574 | AGI-05 | 41.306  | C_unshiu_00771 | 93,947  | 95,687  | -    |
| Af1096 | scaffold_3 | 42,061,488 | 42,063,267 | AGI-05 | 51.052  | C_unshiu_00778 | 89,937  | 90,554  | -    |
| Tf0311 | scaffold_6 | 15,932,016 | 15,936,176 | AGI-08 | 91.89   | C_unshiu_00779 | 79,304  | 79,959  | -    |
| AI0409 | scaffold_7 | 5,042,508  | 5,046,271  | AGI-02 | 50.758  | C_unshiu_00789 | 73,056  | 73,700  | -    |
| Cp1598 | scaffold_3 | 3,802,397  | 3,805,494  | AGI-05 | 12.715  | C_unshiu_00849 | 73,366  | 75,131  | -    |
| Af1515 | scaffold_8 | 20,838,053 | 20,844,872 | AGI-08 | 40.438  | C_unshiu_00883 | 80,334  | 81,223  | -    |
| Fb0357 | scaffold_5 | 40,550,222 | 40,554,434 | AGI-09 | 39.104  | C_unshiu_00889 | 46,605  | 48,233  | -    |
| Af1452 | scaffold_3 | 5,518,457  | 5,529,974  | AGI-05 | 29.863  | C_unshiu_00900 | 29,273  | 30,107  | -    |
| Cp0100 | scaffold_7 | 10,471,136 | 10,474,241 | AGI-02 | 14.111  | C_unshiu_00924 | 50,367  | 50,819  | -    |
| Cp2223 | scaffold_3 | 3,483,334  | 3,485,637  | AGI-05 | 25.049  | C_unshiu_00933 | 87,061  | 88,676  | -    |
| Cp0921 | scaffold_3 | 25,448,858 | 25,451,858 | AGI-05 | 40.001  | C_unshiu_00950 | 89,159  | 91,104  | -    |
| Af1207 | scaffold_7 | 15,605,065 | 15,607,345 | AGI-02 | 21.344  | C_unshiu_00968 | 8,443   | 9,442   | -    |
| Ov0002 | scaffold_4 | 2,422,861  | 2,424,838  | AGI-07 | 13.657  | C_unshiu_00979 | 50,901  | 52,287  | Both |
| Tf0335 | scaffold_4 | 2,457,798  | 2,458,868  | AGI-07 | 13.855  | C_unshiu_00979 | 85,862  | 86,441  | -    |
| Mf0079 | scaffold_8 | 24,721,937 | 24,724,569 | AGI-08 | 3.409   | C_unshiu_00984 | 57,097  | 58,156  | -    |
| Ov0425 | scaffold_2 | 4,021,167  | 4,024,377  | AGI-07 | 41.317  | C_unshiu_00992 | 79,213  | 80,336  | -    |
| Fb1678 | scaffold_3 | 6,000,266  | 6,002,833  | AGI-05 | 45.297  | C_unshiu_00997 | 44,796  | 46,742  | Both |
| Cp0073 | scaffold_3 | 5,972,288  | 5,978,062  | AGI-05 | 34.924  | C_unshiu_00997 | 74,011  | 75,013  | -    |
| Af1345 | scaffold_6 | 13,082,313 | 13,084,012 | AGI-08 | 93.624  | C_unshiu_01022 | 8,834   | 10,060  | -    |
| Gn0021 | scaffold_5 | 39,630,111 | 39,635,609 | AGI-09 | 42.621  | C_unshiu_01033 | 47,913  | 48,240  | -    |
| Tf0300 | scaffold_3 | 43,862,440 | 43,863,744 | AGI-05 | 54.726  | C_unshiu_01051 | 83,628  | 84,359  | -    |
| Tf0070 | scaffold_5 | 39,748,754 | 39,753,073 | AGI-09 | 45.029  | C_unshiu_01089 | 25,449  | 26,436  | -    |
| Lp0207 | scaffold_3 | 6,140,332  | 6,142,252  | AGI-05 | 45.374  | C_unshiu_01103 | 67,599  | 69,085  | -    |
| Tf0195 | scaffold_8 | 67,997     | 74,191     | AGI-08 | 87.683  | C_unshiu_01137 | 32,922  | 33,787  | -    |
| Tf0053 | scaffold_3 | 29,153,425 | 29,156,189 | AGI-05 | 42.265  | C_unshiu_01169 | 39,413  | 40,176  | -    |
| Cp1477 | scaffold_5 | 36,095,844 | 36,099,890 | AGI-09 | 54.123  | C_unshiu_01173 | 63,021  | 63,540  | -    |
| Tf0013 | scaffold_8 | 13,408,610 | 13,413,938 | AGI-08 | 56.123  | C_unshiu_01226 | 24,287  | 25,453  | -    |
| Af1047 | scaffold_3 | 16,357,227 | 16,363,309 | AGI-05 | 41.306  | C_unshiu_01252 | 65,822  | 66,397  | -    |
| Edb003 | scaffold_4 | 16,046,322 | 16,048,971 | AGI-07 | 41.83   | C_unshiu_01260 | 30,382  | 32,249  | -    |
| Tf0286 | scaffold_6 | 25,001,586 | 25,004,619 | AGI-04 | 32.71   | C_unshiu_01279 | 43,379  | 44,545  | -    |
| Af1576 | scaffold_3 | 41,566,338 | 41,572,373 | AGI-05 | 47.986  | C_unshiu_01337 | 33,312  | 33,903  | -    |
| Bf0232 | scaffold_4 | 21,861,774 | 21,865,635 | AGI-07 | 67.25   | C_unshiu_01346 | 18,347  | 19,889  | -    |
| Af1110 | scaffold_8 | 9,656,865  | 9,660,001  | AGI-08 | 56.69   | C_unshiu_01425 | 4,997   | 5,401   | -    |
| Bf0013 | scaffold_1 | 23,111,733 | 23,116,067 | AGI-01 | NL      | C_unshiu_01429 | 14,732  | 15,876  | -    |
| If0002 | scaffold_2 | 35,546,692 | 35,549,207 | AGI-06 | 19.002  | C_unshiu_01497 | 10,346  | 12,188  | Both |
| Tf0119 | scaffold_2 | 35,564,238 | 35,570,619 | AGI-06 | 19.002  | C_unshiu_01497 | 28,065  | 28,836  | -    |
| Gmom24 | scaffold_7 | 15,182,950 | 15,186,486 | AGI-02 | 19.971  | C_unshiu_01526 | 18,768  | 19,509  | -    |
| Tf0153 | scaffold_3 | 16,957,427 | 16,959,735 | AGI-05 | 41.267  | C_unshiu_01562 | 12,097  | 13,368  | -    |
| Af1453 | scaffold_3 | 4,663,211  | 4,664,667  | AGI-05 | 27.956  | C_unshiu_01589 | 28,846  | 30,212  | -    |
| Cp0062 | scaffold_4 | 16,107,199 | 16,111,155 | AGI-07 | 45.716  | C_unshiu_01642 | 17,963  | 19,257  | -    |
| Mf0055 | scaffold_3 | 45,551,345 | 45,552,620 | AGI-05 | 57.948  | C_unshiu_01674 | 27,667  | 28,827  | -    |
| Cp2237 | scaffold_8 | 13,190,041 | 13,194,829 | AGI-08 | 55.965  | C_unshiu_01736 | 20,073  | 21,243  | -    |
| Tf0449 | scaffold_1 | 28,254,307 | 28,257,305 | AGI-01 | 0.404   | C_unshiu_01997 | 33,146  | 34,571  | -    |
| AI0037 | scaffold_7 | 14,310,100 | 14,311,942 | AGI-02 | 15.816  | C_unshiu_02045 | 17,521  | 19,001  | -    |
| Vs0016 | scaffold_8 | 23,429,879 | 23,430,542 | AGI-05 | 25.98   | C_unshiu_02110 | 27,707  | 28,278  | -    |
| Tf0011 | scaffold_3 | 11,078,798 | 11,089,090 | AGI-05 | 42.191  | C_unshiu_02207 | 10,153  | 11,356  | -    |
| AI0011 | scaffold_6 | 10,316,999 | 10,318,328 | AGI-03 | 46.768  | C_unshiu_02282 | 6,806   | 7,761   | -    |
| Cp1267 | scaffold_6 | 7,983,788  | 7,991,526  | AGI-08 | 94.382  | C_unshiu_02325 | 7,587   | 9,259   | -    |
| Tf0326 | scaffold_7 | 2,501,520  | 2,509,737  | AGI-02 | 69.928  | C_unshiu_02417 | 3,915   | 5,288   | -    |
| Cp0052 | scaffold_9 | 26,817,500 | 26,820,707 | AGI-08 | 96.035  | C_unshiu_02495 | 17,083  | 18,310  | -    |
| Cp1628 | scaffold_3 | 12,822,911 | 12,825,620 | AGI-05 | 41.272  | C_unshiu_02666 | 10,379  | 12,058  | -    |
