# Supplementary material for: Mikan Genome Database (MiGD): integrated database of genome annotation, genomic diversity, and CAPS marker information for mandarin molecular breeding
Source: PubMed Central journal article supplement — Breed Sci. 2020 Mar 5;70(2):200–11. doi: 10.1270/jsbbs.19097 (PMC7272249; doi:10.1270/jsbbs.19097), 2020-03-05
Supplement: 70_200_s3.pdf [file 70_200_s3.pdf]

Supplemental Table 2. Mapping result of *C. unshiu* scaffolds sequences (MiGD) against the published *C.unshiu* draft genome (Shimizu et al. 2017)

| Positions in the draft genome (Shimizu et al. 2017) |         |         |        |          | Positions in the assembled scaffolds (MiGD) |        |         |        |          | %Identity |
|-----------------------------------------------------|---------|---------|--------|----------|---------------------------------------------|--------|---------|--------|----------|-----------|
| Sequence ID                                         | Start   | End     | Length | Coverage | Sequence ID                                 | Start  | End     | Length | Coverage |           |
| chr1                                                | 10800   | 68111   | 57312  | 0.25     | C_unshiu_00003                              | 891122 | 948410  | 57289  | 4.37     | 99.96     |
| chr1                                                | 72640   | 369549  | 296910 | 1.32     | C_unshiu_00003                              | 952574 | 1249584 | 297011 | 22.68    | 99.95     |
| chr1                                                | 382376  | 391123  | 8748   | 0.04     | C_unshiu_00129                              | 412873 | 404126  | 8748   | 2.12     | 99.99     |
| chr1                                                | 391201  | 455071  | 63871  | 0.28     | C_unshiu_00129                              | 404038 | 340169  | 63870  | 15.47    | 99.95     |
| chr1                                                | 475816  | 611554  | 135739 | 0.6      | C_unshiu_00129                              | 321816 | 186090  | 135727 | 32.87    | 99.91     |
| chr1                                                | 611872  | 763149  | 151278 | 0.67     | C_unshiu_00129                              | 186068 | 34690   | 151379 | 36.66    | 99.92     |
| chr1                                                | 767187  | 786040  | 18854  | 0.08     | C_unshiu_00129                              | 35338  | 16472   | 18867  | 4.57     | 99.86     |
| chr1                                                | 788830  | 795631  | 6802   | 0.03     | C_unshiu_00129                              | 1      | 6801    | 6801   | 1.65     | 99.99     |
| chr1                                                | 796146  | 800567  | 4422   | 0.02     | C_unshiu_00005                              | 43061  | 47441   | 4381   | 0.39     | 98.35     |
| chr1                                                | 798200  | 1082945 | 284746 | 1.27     | C_unshiu_00005                              | 48403  | 333194  | 284792 | 25.15    | 99.93     |
| chr1                                                | 1062918 | 1249290 | 186373 | 0.83     | C_unshiu_00005                              | 313179 | 499543  | 186365 | 16.46    | 99.98     |
| chr1                                                | 1250224 | 1269006 | 18783  | 0.08     | C_unshiu_00005                              | 500962 | 519748  | 18787  | 1.66     | 99.96     |
| chr1                                                | 1293002 | 1303361 | 10360  | 0.05     | C_unshiu_02342                              | 18155  | 28517   | 10363  | 36.34    | 99.14     |
| chr1                                                | 1320178 | 1321734 | 1557   | 0.01     | C_unshiu_02139                              | 35091  | 33549   | 1543   | 4.36     | 98.52     |
| chr1                                                | 1332900 | 1336652 | 3753   | 0.02     | C_unshiu_00468                              | 53486  | 57230   | 3745   | 1.86     | 98.91     |
| chr1                                                | 1337267 | 1340105 | 2839   | 0.01     | C_unshiu_00468                              | 64222  | 67067   | 2846   | 1.41     | 99.02     |
| chr1                                                | 1341873 | 1353133 | 11261  | 0.05     | C_unshiu_02139                              | 11259  | 1       | 11259  | 31.84    | 98.31     |
| chr1                                                | 1357398 | 1370932 | 13535  | 0.06     | C_unshiu_00468                              | 83857  | 97387   | 13531  | 6.72     | 99.68     |
| chr1                                                | 1375620 | 1387566 | 11947  | 0.05     | C_unshiu_00468                              | 102294 | 114257  | 11964  | 5.95     | 99.32     |
| chr1                                                | 1406124 | 1408921 | 2798   | 0.01     | C_unshiu_00468                              | 135742 | 138552  | 2811   | 1.4      | 98.9      |
| chr1                                                | 1409369 | 1413032 | 3664   | 0.02     | C_unshiu_00468                              | 139321 | 142984  | 3664   | 1.82     | 99.78     |
| chr1                                                | 1428610 | 1453919 | 25310  | 0.11     | C_unshiu_00468                              | 159151 | 184495  | 25345  | 12.6     | 98.27     |
| chr1                                                | 1458196 | 1468544 | 10349  | 0.05     | C_unshiu_00468                              | 187026 | 197384  | 10359  | 5.15     | 98.92     |
| chr1                                                | 1467270 | 1482302 | 15033  | 0.07     | C_unshiu_01963                              | 28255  | 13252   | 15004  | 35.65    | 98.59     |
| chr1                                                | 1486002 | 1489019 | 3018   | 0.01     | C_unshiu_01776                              | 23759  | 26791   | 3033   | 6.14     | 98.52     |
| chr1                                                | 1489117 | 1491248 | 2132   | 0.01     | C_unshiu_01776                              | 26924  | 29055   | 2132   | 4.31     | 99.81     |
| chr1                                                | 1491505 | 1500888 | 9384   | 0.04     | C_unshiu_00586                              | 88683  | 98056   | 9374   | 5.5      | 98.25     |
| chr1                                                | 1501268 | 1509425 | 8158   | 0.04     | C_unshiu_00586                              | 98058  | 106240  | 8183   | 4.8      | 98.55     |
| chr1                                                | 1512276 | 1522318 | 10043  | 0.04     | C_unshiu_00586                              | 108152 | 118197  | 10046  | 5.9      | 99.28     |
| chr1                                                | 1541950 | 1546152 | 4203   | 0.02     | C_unshiu_00586                              | 140688 | 144889  | 4202   | 2.47     | 98.72     |
| chr1                                                | 1553724 | 1559156 | 5433   | 0.02     | C_unshiu_00431                              | 197728 | 192342  | 5387   | 2.51     | 99.06     |
| chr1                                                | 1578613 | 1587885 | 9273   | 0.04     | C_unshiu_00799                              | 125556 | 116316  | 9241   | 7.2      | 99.65     |
| chr1                                                | 1589045 | 1614410 | 25366  | 0.11     | C_unshiu_00799                              | 112631 | 87266   | 25366  | 19.75    | 100       |
| chr1                                                | 1614431 | 1617755 | 3325   | 0.01     | C_unshiu_00799                              | 86687  | 83362   | 3326   | 2.59     | 99.37     |
| chr1                                                | 1617750 | 1620365 | 2616   | 0.01     | C_unshiu_00383                              | 152605 | 149990  | 2616   | 1.15     | 100       |
| chr1                                                | 1622209 | 1623373 | 1165   | 0.01     | C_unshiu_00799                              | 79674  | 78510   | 1165   | 0.91     | 99.83     |
| chr1                                                | 1624455 | 1649771 | 25317  | 0.11     | C_unshiu_00799                              | 77050  | 51657   | 25394  | 19.77    | 99.55     |
| chr1                                                | 1649914 | 1694635 | 44722  | 0.2      | C_unshiu_00799                              | 51078  | 6360    | 44719  | 34.82    | 99.99     |
| chr1                                                | 1699599 | 1701296 | 1698   | 0.01     | C_unshiu_00799                              | 1918   | 224     | 1695   | 1.32     | 98.65     |
| chr1                                                | 1706994 | 1717710 | 10717  | 0.05     | C_unshiu_00097                              | 453674 | 443064  | 10611  | 2.3      | 98.74     |
| chr1                                                | 1717162 | 1718418 | 1257   | 0.01     | C_unshiu_00097                              | 439398 | 438154  | 1245   | 0.27     | 99.05     |
| chr1                                                | 1718947 | 1764844 | 45898  | 0.2      | C_unshiu_00097                              | 437799 | 391970  | 45830  | 9.95     | 99.82     |
| chr1                                                | 1764858 | 1810083 | 45226  | 0.2      | C_unshiu_00097                              | 390904 | 345675  | 45230  | 9.82     | 99.99     |
| chr1                                                | 1810196 | 1814867 | 4672   | 0.02     | C_unshiu_00821                              | 36658  | 31986   | 4673   | 3.7      | 99.32     |
| chr1                                                | 1815948 | 1820700 | 4753   | 0.02     | C_unshiu_00821                              | 30470  | 25722   | 4749   | 3.76     | 99.92     |
| chr1                                                | 1821000 | 1823143 | 2144   | 0.01     | C_unshiu_01100                              | 21241  | 19097   | 2145   | 2.23     | 99.91     |
| chr1                                                | 1829644 | 1838065 | 8422   | 0.04     | C_unshiu_00821                              | 14906  | 6485    | 8422   | 6.67     | 99.88     |
| chr1                                                | 1840474 | 1843776 | 3303   | 0.01     | C_unshiu_00460                              | 202964 | 199660  | 3305   | 1.61     | 99.79     |
| chr1                                                | 1845804 | 1853214 | 7411   | 0.03     | C_unshiu_00460                              | 196951 | 189541  | 7411   | 3.62     | 99.95     |
| chr1                                                | 1853402 | 1860256 | 6855   | 0.03     | C_unshiu_00460                              | 188152 | 181298  | 6855   | 3.35     | 99.72     |
| chr1                                                | 1860757 | 1864458 | 3702   | 0.02     | C_unshiu_00460                              | 180561 | 176861  | 3701   | 1.81     | 99.57     |
| chr1                                                | 1865611 | 1866674 | 1064   | 0        | C_unshiu_00460                              | 173953 | 172890  | 1064   | 0.52     | 99.91     |
| chr1                                                | 1867419 | 1929547 | 62129  | 0.28     | C_unshiu_00005                              | 525685 | 587810  | 62126  | 5.49     | 99.97     |
| chr1                                                | 1909536 | 1961972 | 52437  | 0.23     | C_unshiu_00005                              | 567806 | 620227  | 52422  | 4.63     | 99.97     |
| chr1                                                | 1964207 | 2124323 | 160117 | 0.71     | C_unshiu_00005                              | 624217 | 784298  | 160082 | 14.13    | 99.91     |
| chr1                                                | 2126058 | 2150239 | 24182  | 0.11     | C_unshiu_00005                              | 786725 | 810890  | 24166  | 2.13     | 99.74     |
| chr1                                                | 2130239 | 2169323 | 39085  | 0.17     | C_unshiu_00005                              | 790907 | 829974  | 39068  | 3.45     | 99.84     |
| chr1                                                | 2169090 | 2343915 | 174826 | 0.78     | C_unshiu_00005                              | 834469 | 1009301 | 174833 | 15.44    | 99.95     |
| chr1                                                | 2323891 | 2392729 | 68839  | 0.31     | C_unshiu_00005                              | 989282 | 1058123 | 68842  | 6.08     | 99.96     |
| chr1                                                | 2394017 | 2402457 | 8441   | 0.04     | C_unshiu_00023                              | 504631 | 513079  | 8449   | 1.09     | 99.68     |
| chr1                                                | 2403795 | 2408790 | 4996   | 0.02     | C_unshiu_00023                              | 515057 | 520059  | 5003   | 0.64     | 99.04     |
| chr1                                                | 2408941 | 2419771 | 10831  | 0.05     | C_unshiu_00023                              | 520408 | 531268  | 10861  | 1.4      | 99.29     |
| chr1                                                | 2419777 | 2486478 | 66702  | 0.3      | C_unshiu_00023                              | 531543 | 598347  | 66805  | 8.58     | 99.48     |
| chr1                                                | 2486470 | 2494794 | 8325   | 0.04     | C_unshiu_00023                              | 598499 | 606836  | 8338   | 1.07     | 99.59     |
| chr1                                                | 2495587 | 2507412 | 11826  | 0.05     | C_unshiu_00023                              | 607990 | 619824  | 11835  | 1.52     | 99.77     |
| chr1                                                | 2507405 | 2531604 | 24200  | 0.11     | C_unshiu_00023                              | 620866 | 645051  | 24186  | 3.11     | 99.55     |
| chr1                                                | 2531837 | 2581476 | 49640  | 0.22     | C_unshiu_00023                              | 644875 | 694534  | 49660  | 6.38     | 99.21     |
| chr1                                                | 2581463 | 2627836 | 46374  | 0.21     | C_unshiu_00023                              | 694752 | 741142  | 46391  | 5.96     | 99.65     |
| chr1                                                | 2627981 | 2650052 | 22072  | 0.1      | C_unshiu_00023                              | 741187 | 763292  | 22106  | 2.84     | 99.59     |
| chr1                                                | 2650051 | 2662600 | 12550  | 0.06     | C_unshiu_00023                              | 764026 | 776443  | 12418  | 1.6      | 98.08     |
| chr1                                                | 2660820 | 2678935 | 18116  | 0.08     | C_unshiu_00978                              | 108740 | 90606   | 18135  | 16.68    | 99.65     |
| chr1                                                | 2681081 | 2769115 | 88035  | 0.39     | C_unshiu_00978                              | 87991  | 1       | 87991  | 80.92    | 99.48     |
| chr1                                                | 2762531 | 2780496 | 17966  | 0.08     | C_unshiu_00261                              | 1      | 17999   | 17999  | 6.29     | 99.69     |
| chr1                                                | 2780490 | 2782484 | 1995   | 0.01     | C_unshiu_00261                              | 18036  | 20059   | 2024   | 0.71     | 98.17     |
| chr1                                                | 2797499 | 2825184 | 27686  | 0.12     | C_unshiu_00261                              | 33793  | 61498   | 27706  | 9.68     | 99.43     |
| chr1                                                | 2825199 | 2847327 | 22129  | 0.1      | C_unshiu_00261                              | 61656  | 83803   | 22148  | 7.74     | 99.61     |

|      |         |         |        |      |                |         |        |        |       |       |
|------|---------|---------|--------|------|----------------|---------|--------|--------|-------|-------|
| chr1 | 2848082 | 2915413 | 67332  | 0.3  | C_unshiu_00261 | 85126   | 152496 | 67371  | 23.54 | 99.67 |
| chr1 | 2912626 | 2915765 | 3140   | 0.01 | C_unshiu_00026 | 753598  | 750458 | 3141   | 0.42  | 99.33 |
| chr1 | 2916638 | 2943296 | 26659  | 0.12 | C_unshiu_00026 | 750449  | 723779 | 26671  | 3.54  | 99.79 |
| chr1 | 2943300 | 2946574 | 3275   | 0.01 | C_unshiu_00026 | 724079  | 720795 | 3285   | 0.44  | 99.03 |
| chr1 | 2946025 | 2980893 | 34869  | 0.16 | C_unshiu_00026 | 719460  | 684591 | 34870  | 4.63  | 99.74 |
| chr1 | 2980891 | 2982269 | 1379   | 0.01 | C_unshiu_00026 | 684464  | 683086 | 1379   | 0.18  | 100   |
| chr1 | 2982561 | 3005103 | 22543  | 0.1  | C_unshiu_00026 | 682547  | 659929 | 22619  | 3     | 99.12 |
| chr1 | 3029286 | 3033162 | 3877   | 0.02 | C_unshiu_00026 | 636104  | 632217 | 3888   | 0.52  | 99.33 |
| chr1 | 3033157 | 3034297 | 1141   | 0.01 | C_unshiu_00053 | 19452   | 18312  | 1141   | 0.19  | 100   |
| chr1 | 3035425 | 3053011 | 17587  | 0.08 | C_unshiu_00026 | 630315  | 612705 | 17611  | 2.34  | 99.46 |
| chr1 | 3052934 | 3061134 | 8201   | 0.04 | C_unshiu_00026 | 612726  | 604523 | 8204   | 1.09  | 99.84 |
| chr1 | 3061396 | 3075335 | 13940  | 0.06 | C_unshiu_00026 | 604081  | 590184 | 13898  | 1.84  | 98.97 |
| chr1 | 3075361 | 3076784 | 1424   | 0.01 | C_unshiu_00026 | 589899  | 588476 | 1424   | 0.19  | 99.72 |
| chr1 | 3076785 | 3093960 | 17176  | 0.08 | C_unshiu_00026 | 588513  | 571346 | 17168  | 2.28  | 99.69 |
| chr1 | 3097186 | 3112110 | 14925  | 0.07 | C_unshiu_00026 | 568116  | 553225 | 14892  | 1.98  | 98.61 |
| chr1 | 3112142 | 3118502 | 6361   | 0.03 | C_unshiu_00026 | 550920  | 544545 | 6376   | 0.85  | 98.43 |
| chr1 | 3119107 | 3120508 | 1402   | 0.01 | C_unshiu_00026 | 544976  | 543581 | 1396   | 0.19  | 99.29 |
| chr1 | 3123205 | 3131733 | 8529   | 0.04 | C_unshiu_00309 | 15101   | 23631  | 8531   | 3.27  | 99.78 |
| chr1 | 3133791 | 3142578 | 8788   | 0.04 | C_unshiu_00309 | 26078   | 34866  | 8789   | 3.37  | 99.99 |
| chr1 | 3146183 | 3202166 | 55984  | 0.25 | C_unshiu_00309 | 40183   | 96145  | 55963  | 21.47 | 99.94 |
| chr1 | 3202948 | 3233086 | 30139  | 0.13 | C_unshiu_00309 | 97454   | 127642 | 30189  | 11.58 | 99.72 |
| chr1 | 3251328 | 3254482 | 3155   | 0.01 | C_unshiu_00833 | 89562   | 86380  | 3183   | 2.56  | 98.93 |
| chr1 | 3260496 | 3318235 | 57740  | 0.26 | C_unshiu_00833 | 80989   | 23260  | 57730  | 46.34 | 99.83 |
| chr1 | 3298255 | 3341467 | 43213  | 0.19 | C_unshiu_00833 | 43253   | 1      | 43253  | 34.72 | 99.9  |
| chr1 | 3337361 | 3365252 | 27892  | 0.12 | C_unshiu_02331 | 28863   | 911    | 27953  | 96.85 | 99.78 |
| chr1 | 3419132 | 3470645 | 51514  | 0.23 | C_unshiu_01313 | 76003   | 24489  | 51515  | 67.74 | 99.95 |
| chr1 | 3481358 | 3562171 | 80814  | 0.36 | C_unshiu_00006 | 1066733 | 985929 | 80805  | 7.2   | 99.96 |
| chr1 | 3542176 | 3607933 | 65758  | 0.29 | C_unshiu_00006 | 1005911 | 940135 | 65777  | 5.86  | 99.5  |
| chr1 | 3605765 | 3647942 | 42178  | 0.19 | C_unshiu_00006 | 946370  | 904189 | 42182  | 3.76  | 99.18 |
| chr1 | 3627950 | 3718955 | 91006  | 0.4  | C_unshiu_00006 | 924189  | 833181 | 91009  | 8.11  | 99.96 |
| chr1 | 3722456 | 3950183 | 227728 | 1.01 | C_unshiu_00006 | 832469  | 604740 | 227730 | 20.3  | 99.92 |
| chr1 | 3952002 | 3954147 | 2146   | 0.01 | C_unshiu_00006 | 603807  | 601662 | 2146   | 0.19  | 100   |
| chr1 | 3954502 | 4104197 | 149696 | 0.67 | C_unshiu_00006 | 600949  | 451246 | 149704 | 13.34 | 99.96 |
| chr1 | 4084209 | 4189766 | 105558 | 0.47 | C_unshiu_00006 | 471223  | 365570 | 105654 | 9.42  | 99.88 |
| chr1 | 4189788 | 4195250 | 5463   | 0.02 | C_unshiu_00006 | 365412  | 359986 | 5427   | 0.48  | 99.07 |
| chr1 | 4198014 | 4222229 | 24216  | 0.11 | C_unshiu_01464 | 35677   | 11435  | 24243  | 36.95 | 99.25 |
| chr1 | 4229474 | 4233730 | 4257   | 0.02 | C_unshiu_00349 | 230337  | 226081 | 4257   | 1.75  | 100   |
| chr1 | 4233809 | 4236861 | 3053   | 0.01 | C_unshiu_00349 | 225907  | 222883 | 3025   | 1.24  | 98.66 |
| chr1 | 4254033 | 4255891 | 1859   | 0.01 | C_unshiu_01356 | 30245   | 32097  | 1853   | 2.51  | 98.82 |
| chr1 | 4267652 | 4270769 | 3118   | 0.01 | C_unshiu_01356 | 43501   | 46618  | 3118   | 4.23  | 100   |
| chr1 | 4271675 | 4273917 | 2243   | 0.01 | C_unshiu_01906 | 44355   | 42122  | 2234   | 5.04  | 99.11 |
| chr1 | 4276923 | 4279909 | 2987   | 0.01 | C_unshiu_01906 | 40231   | 37245  | 2987   | 6.73  | 100   |
| chr1 | 4280679 | 4282156 | 1478   | 0.01 | C_unshiu_01906 | 36165   | 34688  | 1478   | 3.33  | 100   |
| chr1 | 4297842 | 4303133 | 5292   | 0.02 | C_unshiu_01906 | 20914   | 15622  | 5293   | 11.93 | 99.34 |
| chr1 | 4309934 | 4312897 | 2964   | 0.01 | C_unshiu_00114 | 428795  | 425831 | 2965   | 0.68  | 99.06 |
| chr1 | 4321632 | 4330592 | 8961   | 0.04 | C_unshiu_00114 | 418498  | 409538 | 8961   | 2.06  | 98.3  |
| chr1 | 4331481 | 4334230 | 2750   | 0.01 | C_unshiu_00114 | 408612  | 405864 | 2749   | 0.63  | 99.31 |
| chr1 | 4334217 | 4340670 | 6454   | 0.03 | C_unshiu_00212 | 75724   | 69272  | 6453   | 1.97  | 99.95 |
| chr1 | 4340674 | 4345213 | 4540   | 0.02 | C_unshiu_00114 | 399171  | 394626 | 4546   | 1.05  | 98.94 |
| chr1 | 4360851 | 4362086 | 1236   | 0.01 | C_unshiu_00114 | 379304  | 378069 | 1236   | 0.28  | 98.71 |
| chr1 | 4379984 | 4403747 | 23764  | 0.11 | C_unshiu_00114 | 360266  | 336518 | 23749  | 5.47  | 98.57 |
| chr1 | 4404734 | 4409638 | 4905   | 0.02 | C_unshiu_00114 | 334798  | 329877 | 4922   | 1.13  | 98.84 |
| chr1 | 4411653 | 4414179 | 2527   | 0.01 | C_unshiu_02978 | 831     | 3356   | 2526   | 18.68 | 99.84 |
| chr1 | 4415317 | 4424148 | 8832   | 0.04 | C_unshiu_02978 | 4687    | 13522  | 8836   | 65.35 | 98.86 |
| chr1 | 4431743 | 4474521 | 42779  | 0.19 | C_unshiu_00114 | 303642  | 260903 | 42740  | 9.85  | 98.86 |
| chr1 | 4474949 | 4483679 | 8731   | 0.04 | C_unshiu_01560 | 40234   | 31521  | 8714   | 14.55 | 99.74 |
| chr1 | 4483699 | 4497362 | 13664  | 0.06 | C_unshiu_01560 | 30762   | 17097  | 13666  | 22.82 | 99.48 |
| chr1 | 4507397 | 4510882 | 3486   | 0.02 | C_unshiu_01560 | 3494    | 1      | 3494   | 5.84  | 98.66 |
| chr1 | 4530283 | 4535382 | 5100   | 0.02 | C_unshiu_00208 | 145285  | 150360 | 5076   | 1.54  | 99.22 |
| chr1 | 4540851 | 4543094 | 2244   | 0.01 | C_unshiu_00006 | 356353  | 354095 | 2259   | 0.2   | 99.03 |
| chr1 | 4547985 | 4563915 | 15931  | 0.07 | C_unshiu_00006 | 345018  | 329070 | 15949  | 1.42  | 99.84 |
| chr1 | 4563979 | 4612970 | 48992  | 0.22 | C_unshiu_00006 | 328515  | 279520 | 48996  | 4.37  | 99.86 |
| chr1 | 4592964 | 4641333 | 48370  | 0.22 | C_unshiu_00006 | 299515  | 251170 | 48346  | 4.31  | 99.89 |
| chr1 | 4640656 | 4818621 | 177966 | 0.79 | C_unshiu_00006 | 241834  | 63931  | 177904 | 15.86 | 99.87 |
| chr1 | 4818252 | 4843491 | 25240  | 0.11 | C_unshiu_00006 | 64215   | 39010  | 25206  | 2.25  | 99.69 |
| chr1 | 4867195 | 4871052 | 3858   | 0.02 | C_unshiu_00055 | 187887  | 184030 | 3858   | 0.65  | 100   |
| chr1 | 4870937 | 4875458 | 4522   | 0.02 | C_unshiu_00055 | 184033  | 179507 | 4527   | 0.76  | 99.14 |
| chr1 | 4875468 | 4898183 | 22716  | 0.1  | C_unshiu_00055 | 179270  | 156539 | 22732  | 3.82  | 99.93 |
| chr1 | 4878212 | 4958315 | 80104  | 0.36 | C_unshiu_00055 | 176526  | 96402  | 80125  | 13.48 | 99.97 |
| chr1 | 4958995 | 4986927 | 27933  | 0.12 | C_unshiu_00055 | 95275   | 67313  | 27963  | 4.7   | 99.89 |
| chr1 | 4991528 | 5054821 | 63294  | 0.28 | C_unshiu_00055 | 63300   | 1      | 63300  | 10.65 | 99.91 |
| chr1 | 5053412 | 5078060 | 24649  | 0.11 | C_unshiu_00572 | 169290  | 144687 | 24604  | 14.25 | 99.78 |
| chr1 | 5058053 | 5106971 | 48919  | 0.22 | C_unshiu_00572 | 164686  | 115820 | 48867  | 28.3  | 99.87 |
| chr1 | 5108568 | 5112800 | 4233   | 0.02 | C_unshiu_00572 | 113721  | 109481 | 4241   | 2.46  | 99.79 |
| chr1 | 5113114 | 5154738 | 41625  | 0.19 | C_unshiu_00572 | 105225  | 63547  | 41679  | 24.14 | 99.87 |
| chr1 | 5154934 | 5174363 | 19430  | 0.09 | C_unshiu_00572 | 63221   | 43788  | 19434  | 11.26 | 99.97 |
| chr1 | 5174349 | 5188199 | 13851  | 0.06 | C_unshiu_00572 | 43761   | 29911  | 13851  | 8.02  | 100   |
| chr1 | 5199730 | 5203810 | 4081   | 0.02 | C_unshiu_00572 | 17714   | 13645  | 4070   | 2.36  | 99.14 |
| chr1 | 5204461 | 5216867 | 12407  | 0.06 | C_unshiu_00572 | 12406   | 1      | 12406  | 7.19  | 99.98 |

|      |         |         |        |      |                |        |        |        |       |       |
|------|---------|---------|--------|------|----------------|--------|--------|--------|-------|-------|
| chr1 | 5231053 | 5245405 | 14353  | 0.06 | C_unshiu_00171 | 305677 | 291325 | 14353  | 3.91  | 100   |
| chr1 | 5245384 | 5311157 | 65774  | 0.29 | C_unshiu_00171 | 291263 | 225540 | 65724  | 17.91 | 99.75 |
| chr1 | 5311175 | 5312620 | 1446   | 0.01 | C_unshiu_00171 | 223549 | 222111 | 1439   | 0.39  | 99.03 |
| chr1 | 5326327 | 5357749 | 31423  | 0.14 | C_unshiu_00628 | 151487 | 120028 | 31460  | 19.54 | 98.22 |
| chr1 | 5358407 | 5368148 | 9742   | 0.04 | C_unshiu_00628 | 118866 | 109127 | 9740   | 6.05  | 98.04 |
| chr1 | 5368713 | 5376775 | 8063   | 0.04 | C_unshiu_02633 | 11725  | 19775  | 8051   | 37.73 | 98.95 |
| chr1 | 5377061 | 5382018 | 4958   | 0.02 | C_unshiu_00628 | 99499  | 94485  | 5015   | 3.12  | 98.03 |
| chr1 | 5386122 | 5403982 | 17861  | 0.08 | C_unshiu_00628 | 93503  | 75603  | 17901  | 11.12 | 98.03 |
| chr1 | 5404248 | 5405927 | 1680   | 0.01 | C_unshiu_00628 | 75345  | 73666  | 1680   | 1.04  | 99.58 |
| chr1 | 5406151 | 5407406 | 1256   | 0.01 | C_unshiu_02961 | 1254   | 1      | 1254   | 8.88  | 99.84 |
| chr1 | 5407106 | 5412423 | 5318   | 0.02 | C_unshiu_00520 | 185363 | 180049 | 5315   | 2.87  | 99.34 |
| chr1 | 5413616 | 5423134 | 9519   | 0.04 | C_unshiu_00628 | 68224  | 58690  | 9535   | 5.92  | 98.42 |
| chr1 | 5418143 | 5426703 | 8561   | 0.04 | C_unshiu_00520 | 173861 | 165298 | 8564   | 4.62  | 98.47 |
| chr1 | 5472160 | 5474216 | 2057   | 0.01 | C_unshiu_00628 | 10138  | 8085   | 2054   | 1.28  | 98.98 |
| chr1 | 5474357 | 5479167 | 4811   | 0.02 | C_unshiu_00628 | 7568   | 2746   | 4823   | 3     | 98.04 |
| chr1 | 5481478 | 5490902 | 9425   | 0.04 | C_unshiu_01577 | 22919  | 32367  | 9449   | 16.07 | 99.34 |
| chr1 | 5491061 | 5493773 | 2713   | 0.01 | C_unshiu_01577 | 32873  | 35586  | 2714   | 4.61  | 99.96 |
| chr1 | 5509120 | 5510138 | 1019   | 0    | C_unshiu_02271 | 5336   | 4319   | 1018   | 3.3   | 99.41 |
| chr1 | 5518698 | 5523243 | 4546   | 0.02 | C_unshiu_01417 | 69612  | 65088  | 4525   | 6.5   | 99.1  |
| chr1 | 5528956 | 5530684 | 1729   | 0.01 | C_unshiu_00204 | 290839 | 292570 | 1732   | 0.52  | 99.65 |
| chr1 | 5530822 | 5534587 | 3766   | 0.02 | C_unshiu_00204 | 293105 | 296871 | 3767   | 1.13  | 99.58 |
| chr1 | 5534856 | 5536581 | 1726   | 0.01 | C_unshiu_01417 | 57633  | 55908  | 1726   | 2.48  | 99.94 |
| chr1 | 5536620 | 5572386 | 35767  | 0.16 | C_unshiu_01417 | 55590  | 19941  | 35650  | 51.21 | 98.85 |
| chr1 | 5577804 | 5579320 | 1517   | 0.01 | C_unshiu_00204 | 303482 | 304998 | 1517   | 0.46  | 99.87 |
| chr1 | 5579333 | 5581335 | 2003   | 0.01 | C_unshiu_01417 | 12111  | 10109  | 2003   | 2.88  | 100   |
| chr1 | 5581856 | 5588900 | 7045   | 0.03 | C_unshiu_01417 | 9212   | 2175   | 7038   | 10.11 | 99.83 |
| chr1 | 5589341 | 5590762 | 1422   | 0.01 | C_unshiu_01417 | 1422   | 1      | 1422   | 2.04  | 99.93 |
| chr1 | 5590963 | 5595638 | 4676   | 0.02 | C_unshiu_01224 | 53268  | 57943  | 4676   | 5.61  | 100   |
| chr1 | 5596652 | 5708541 | 111890 | 0.5  | C_unshiu_00203 | 323269 | 211346 | 111924 | 33.56 | 99.94 |
| chr1 | 5708533 | 5743448 | 34916  | 0.16 | C_unshiu_00203 | 210304 | 175354 | 34951  | 10.48 | 99.86 |
| chr1 | 5723499 | 5743849 | 20351  | 0.09 | C_unshiu_00203 | 195338 | 174953 | 20386  | 6.11  | 99.76 |
| chr1 | 5745027 | 5762113 | 17087  | 0.08 | C_unshiu_00203 | 173318 | 156228 | 17091  | 5.12  | 99.95 |
| chr1 | 5762562 | 5828248 | 65687  | 0.29 | C_unshiu_00203 | 155192 | 89588  | 65605  | 19.67 | 99.81 |
| chr1 | 5808252 | 5838526 | 30275  | 0.13 | C_unshiu_00203 | 109564 | 79325  | 30240  | 9.07  | 99.59 |
| chr1 | 5844580 | 5922342 | 77763  | 0.35 | C_unshiu_00547 | 169667 | 91832  | 77836  | 43.49 | 99.74 |
| chr1 | 5922343 | 5945774 | 23432  | 0.1  | C_unshiu_00547 | 91599  | 68360  | 23240  | 12.98 | 98.78 |
| chr1 | 5947272 | 5950208 | 2937   | 0.01 | C_unshiu_00547 | 68434  | 65496  | 2939   | 1.64  | 99.93 |
| chr1 | 5952223 | 5962513 | 10291  | 0.05 | C_unshiu_00547 | 64024  | 53734  | 10291  | 5.75  | 100   |
| chr1 | 5963676 | 5997195 | 33520  | 0.15 | C_unshiu_00547 | 52785  | 19261  | 33525  | 18.73 | 99.93 |
| chr1 | 5997087 | 5999576 | 2490   | 0.01 | C_unshiu_00547 | 16773  | 19262  | 2490   | 1.39  | 99.84 |
| chr1 | 6010003 | 6011523 | 1521   | 0.01 | C_unshiu_00039 | 151302 | 152822 | 1521   | 0.23  | 100   |
| chr1 | 6011522 | 6019959 | 8438   | 0.04 | C_unshiu_00039 | 151303 | 142865 | 8439   | 1.28  | 99.88 |
| chr1 | 6025074 | 6034985 | 9912   | 0.04 | C_unshiu_00039 | 143031 | 133120 | 9912   | 1.5   | 99.82 |
| chr1 | 6035001 | 6044760 | 9760   | 0.04 | C_unshiu_00039 | 131493 | 121734 | 9760   | 1.48  | 100   |
| chr1 | 6044761 | 6161470 | 116710 | 0.52 | C_unshiu_00039 | 121800 | 5143   | 116658 | 17.67 | 99.93 |
| chr1 | 6161511 | 6179717 | 18207  | 0.08 | C_unshiu_00016 | 864068 | 845860 | 18209  | 2.09  | 99.98 |
| chr1 | 6184586 | 6186687 | 2102   | 0.01 | C_unshiu_00016 | 841713 | 839612 | 2102   | 0.24  | 99.81 |
| chr1 | 6186598 | 6247146 | 60549  | 0.27 | C_unshiu_00016 | 839650 | 779070 | 60581  | 6.94  | 99.93 |
| chr1 | 6252439 | 6296073 | 43635  | 0.19 | C_unshiu_00016 | 767331 | 723680 | 43652  | 5     | 99.95 |
| chr1 | 6298437 | 6332224 | 33788  | 0.15 | C_unshiu_00016 | 720750 | 686986 | 33765  | 3.87  | 99.9  |
| chr1 | 6339387 | 6349833 | 10447  | 0.05 | C_unshiu_00016 | 679616 | 669250 | 10367  | 1.19  | 98.12 |
| chr1 | 6352957 | 6404503 | 51547  | 0.23 | C_unshiu_00016 | 662476 | 610936 | 51541  | 5.9   | 99.92 |
| chr1 | 6404502 | 6412029 | 7528   | 0.03 | C_unshiu_00796 | 106626 | 114153 | 7528   | 5.85  | 100   |
| chr1 | 6430556 | 6433989 | 3434   | 0.02 | C_unshiu_00016 | 585835 | 582400 | 3436   | 0.39  | 99.56 |
| chr1 | 6436420 | 6442559 | 6140   | 0.03 | C_unshiu_00016 | 580512 | 574378 | 6135   | 0.7   | 99.82 |
| chr1 | 6446125 | 6457776 | 11652  | 0.05 | C_unshiu_00016 | 572012 | 560359 | 11654  | 1.33  | 99.98 |
| chr1 | 6459316 | 6555057 | 95742  | 0.43 | C_unshiu_00016 | 560207 | 464462 | 95746  | 10.96 | 99.99 |
| chr1 | 6556820 | 6569210 | 12391  | 0.06 | C_unshiu_00016 | 462251 | 449858 | 12394  | 1.42  | 99.86 |
| chr1 | 6569777 | 6571154 | 1378   | 0.01 | C_unshiu_00016 | 448825 | 447448 | 1378   | 0.16  | 100   |
| chr1 | 6573823 | 6616660 | 42838  | 0.19 | C_unshiu_00016 | 446306 | 403551 | 42756  | 4.9   | 99.6  |
| chr1 | 6617564 | 6664292 | 46729  | 0.21 | C_unshiu_00919 | 59511  | 12863  | 46649  | 40.59 | 99.81 |
| chr1 | 6644291 | 6673136 | 28846  | 0.13 | C_unshiu_00919 | 32856  | 4019   | 28838  | 25.09 | 99.96 |
| chr1 | 6673135 | 6677155 | 4021   | 0.02 | C_unshiu_00919 | 1      | 4021   | 4021   | 3.5   | 100   |
| chr1 | 6682017 | 6726369 | 44353  | 0.2  | C_unshiu_00744 | 2972   | 47249  | 44278  | 32.27 | 99.68 |
| chr1 | 6734195 | 6753216 | 19022  | 0.08 | C_unshiu_02048 | 17130  | 36236  | 19107  | 49.36 | 98.66 |
| chr1 | 6753228 | 6755688 | 2461   | 0.01 | C_unshiu_02048 | 38710  | 36251  | 2460   | 6.35  | 99.96 |
| chr1 | 6765153 | 6771330 | 6178   | 0.03 | C_unshiu_00191 | 218276 | 224431 | 6156   | 1.79  | 99    |
| chr1 | 6765932 | 6775336 | 9405   | 0.04 | C_unshiu_00191 | 225184 | 234590 | 9407   | 2.73  | 99.98 |
| chr1 | 6774960 | 6792836 | 17877  | 0.08 | C_unshiu_00191 | 237208 | 255091 | 17884  | 5.2   | 99.94 |
| chr1 | 6792875 | 6834775 | 41901  | 0.19 | C_unshiu_00191 | 255458 | 297328 | 41871  | 12.16 | 99.82 |
| chr1 | 6839066 | 6870729 | 31664  | 0.14 | C_unshiu_00191 | 301093 | 332613 | 31521  | 9.16  | 98.91 |
| chr1 | 6875058 | 6877627 | 2570   | 0.01 | C_unshiu_00191 | 336552 | 339121 | 2570   | 0.75  | 100   |
| chr1 | 6878155 | 6882194 | 4040   | 0.02 | C_unshiu_00191 | 340076 | 344095 | 4020   | 1.17  | 98.2  |
| chr1 | 6884147 | 6894670 | 10524  | 0.05 | C_unshiu_01898 | 44793  | 34269  | 10525  | 23.5  | 99.95 |
| chr1 | 6914547 | 7022727 | 108181 | 0.48 | C_unshiu_00973 | 109260 | 918    | 108343 | 99.16 | 99.73 |
| chr1 | 7026443 | 7081063 | 54621  | 0.24 | C_unshiu_00516 | 180750 | 126281 | 54470  | 29.22 | 99.56 |
| chr1 | 7081083 | 7148561 | 67479  | 0.3  | C_unshiu_00516 | 125940 | 58462  | 67479  | 36.2  | 99.99 |
| chr1 | 7148561 | 7174281 | 25721  | 0.11 | C_unshiu_00516 | 58333  | 32660  | 25674  | 13.77 | 99.75 |
| chr1 | 7175300 | 7198207 | 22908  | 0.1  | C_unshiu_00516 | 31957  | 9025   | 22933  | 12.3  | 99.84 |

|      |         |         |        |      |                |        |        |        |       |       |
|------|---------|---------|--------|------|----------------|--------|--------|--------|-------|-------|
| chr1 | 7205140 | 7224182 | 19043  | 0.08 | C_unshiu_00055 | 196941 | 215973 | 19033  | 3.2   | 99.92 |
| chr1 | 7226830 | 7464918 | 238089 | 1.06 | C_unshiu_00055 | 218763 | 456793 | 238031 | 40.05 | 99.92 |
| chr1 | 7464547 | 7472744 | 8198   | 0.04 | C_unshiu_00055 | 456835 | 465031 | 8197   | 1.38  | 99.91 |
| chr1 | 7472848 | 7542235 | 69388  | 0.31 | C_unshiu_00867 | 9394   | 78784  | 69391  | 57.43 | 99.95 |
| chr1 | 7543348 | 7553379 | 10032  | 0.04 | C_unshiu_00867 | 80439  | 90470  | 10032  | 8.3   | 99.98 |
| chr1 | 7551859 | 7553379 | 1521   | 0.01 | C_unshiu_00867 | 78346  | 79867  | 1522   | 1.26  | 98.69 |
| chr1 | 7567440 | 7568916 | 1477   | 0.01 | C_unshiu_01540 | 1477   | 1      | 1477   | 2.42  | 100   |
| chr1 | 7567512 | 7601398 | 33887  | 0.15 | C_unshiu_01540 | 1472   | 35228  | 33757  | 55.36 | 99.25 |
| chr1 | 7603404 | 7619695 | 16292  | 0.07 | C_unshiu_01540 | 37972  | 54263  | 16292  | 26.72 | 99.92 |
| chr1 | 7627738 | 7641261 | 13524  | 0.06 | C_unshiu_02598 | 1      | 13530  | 13530  | 61.07 | 99.86 |
| chr1 | 7631518 | 7645966 | 14449  | 0.06 | C_unshiu_00156 | 292388 | 277941 | 14448  | 3.82  | 99.9  |
| chr1 | 7646107 | 7655320 | 9214   | 0.04 | C_unshiu_00156 | 277633 | 268420 | 9214   | 2.44  | 99.97 |
| chr1 | 7655321 | 7656517 | 1197   | 0.01 | C_unshiu_00459 | 174510 | 173314 | 1197   | 0.58  | 100   |
| chr1 | 7656683 | 7665055 | 8373   | 0.04 | C_unshiu_00156 | 266661 | 258288 | 8374   | 2.21  | 99.95 |
| chr1 | 7669138 | 7739454 | 70317  | 0.31 | C_unshiu_00156 | 255060 | 184747 | 70314  | 18.59 | 99.87 |
| chr1 | 7741580 | 7769091 | 27512  | 0.12 | C_unshiu_00156 | 185433 | 157932 | 27502  | 7.27  | 99.91 |
| chr1 | 7749095 | 7798046 | 48952  | 0.22 | C_unshiu_00156 | 177918 | 128979 | 48940  | 12.94 | 99.91 |
| chr1 | 7823720 | 7824825 | 1106   | 0    | C_unshiu_00922 | 113368 | 114462 | 1095   | 0.96  | 98.2  |
| chr1 | 7824907 | 7872858 | 47952  | 0.21 | C_unshiu_00922 | 113325 | 65327  | 47999  | 41.93 | 99.81 |
| chr1 | 7879681 | 7886769 | 7089   | 0.03 | C_unshiu_00922 | 58506  | 51418  | 7089   | 6.19  | 100   |
| chr1 | 7889932 | 7898389 | 8458   | 0.04 | C_unshiu_00922 | 48876  | 40418  | 8459   | 7.39  | 99.99 |
| chr1 | 7899518 | 7917695 | 18178  | 0.08 | C_unshiu_00725 | 1      | 18199  | 18199  | 13.01 | 99.82 |
| chr1 | 7917716 | 7933365 | 15650  | 0.07 | C_unshiu_00725 | 19140  | 34697  | 15558  | 11.13 | 99.14 |
| chr1 | 7934822 | 7946408 | 11587  | 0.05 | C_unshiu_00725 | 35988  | 47558  | 11571  | 8.27  | 99.3  |
| chr1 | 7951925 | 7991815 | 39891  | 0.18 | C_unshiu_00725 | 52595  | 92507  | 39913  | 28.54 | 99.89 |
| chr1 | 7993506 | 7995127 | 1622   | 0.01 | C_unshiu_00684 | 134330 | 135952 | 1623   | 1.1   | 98.03 |
| chr1 | 7993506 | 7995127 | 1622   | 0.01 | C_unshiu_00725 | 94665  | 96269  | 1605   | 1.15  | 98.46 |
| chr1 | 7995551 | 8001248 | 5698   | 0.03 | C_unshiu_00038 | 572050 | 577747 | 5698   | 0.85  | 100   |
| chr1 | 8001243 | 8019476 | 18234  | 0.08 | C_unshiu_00725 | 107316 | 125549 | 18234  | 13.04 | 100   |
| chr1 | 8065154 | 8066287 | 1134   | 0.01 | C_unshiu_00892 | 5443   | 6579   | 1137   | 0.97  | 99.65 |
| chr1 | 8072495 | 8075277 | 2783   | 0.01 | C_unshiu_00892 | 10841  | 13623  | 2783   | 2.36  | 100   |
| chr1 | 8075383 | 8076801 | 1419   | 0.01 | C_unshiu_00892 | 14626  | 16044  | 1419   | 1.21  | 100   |
| chr1 | 8077443 | 8084790 | 7348   | 0.03 | C_unshiu_00892 | 17071  | 24420  | 7350   | 6.24  | 99.8  |
| chr1 | 8089348 | 8091194 | 1847   | 0.01 | C_unshiu_01667 | 2479   | 633    | 1847   | 3.4   | 100   |
| chr1 | 8095746 | 8096939 | 1194   | 0.01 | C_unshiu_00419 | 112396 | 111202 | 1195   | 0.54  | 98.66 |
| chr1 | 8123344 | 8128615 | 5272   | 0.02 | C_unshiu_01019 | 6405   | 11676  | 5272   | 5.07  | 99.72 |
| chr1 | 8128677 | 8130210 | 1534   | 0.01 | C_unshiu_01019 | 11946  | 13479  | 1534   | 1.47  | 99.93 |
| chr1 | 8130233 | 8152237 | 22005  | 0.1  | C_unshiu_01019 | 13881  | 35816  | 21936  | 21.09 | 99.21 |
| chr1 | 8151879 | 8156147 | 4269   | 0.02 | C_unshiu_00057 | 380219 | 384485 | 4267   | 0.72  | 99.91 |
| chr1 | 8162013 | 8179221 | 17209  | 0.08 | C_unshiu_00057 | 394654 | 411865 | 17212  | 2.91  | 99.84 |
| chr1 | 8180599 | 8247880 | 67282  | 0.3  | C_unshiu_00057 | 413766 | 481142 | 67377  | 11.41 | 99.63 |
| chr1 | 8250100 | 8252237 | 2138   | 0.01 | C_unshiu_00057 | 482902 | 485015 | 2114   | 0.36  | 98.88 |
| chr1 | 8252238 | 8255024 | 2787   | 0.01 | C_unshiu_00057 | 491340 | 494127 | 2788   | 0.47  | 99.86 |
| chr1 | 8262573 | 8264332 | 1760   | 0.01 | C_unshiu_00396 | 156799 | 158559 | 1761   | 0.79  | 99.77 |
| chr1 | 8264305 | 8283549 | 19245  | 0.09 | C_unshiu_00396 | 156796 | 137538 | 19259  | 8.62  | 99.79 |
| chr1 | 8283762 | 8372236 | 88475  | 0.39 | C_unshiu_00396 | 136869 | 48365  | 88505  | 39.6  | 99.7  |
| chr1 | 8380317 | 8383850 | 3534   | 0.02 | C_unshiu_00396 | 40385  | 36858  | 3528   | 1.58  | 99.63 |
| chr1 | 8384640 | 8392182 | 7543   | 0.03 | C_unshiu_00396 | 35952  | 28396  | 7557   | 3.38  | 99.47 |
| chr1 | 8392169 | 8405401 | 13233  | 0.06 | C_unshiu_00396 | 28335  | 15098  | 13238  | 5.92  | 99.63 |
| chr1 | 8405502 | 8521552 | 116051 | 0.52 | C_unshiu_00842 | 119295 | 3213   | 116083 | 94.14 | 99.76 |
| chr1 | 8533157 | 8539657 | 6501   | 0.03 | C_unshiu_00020 | 783169 | 776702 | 6468   | 0.82  | 99.4  |
| chr1 | 8539630 | 8677095 | 137466 | 0.61 | C_unshiu_00020 | 776474 | 638943 | 137532 | 17.51 | 99.81 |
| chr1 | 8678633 | 8680496 | 1864   | 0.01 | C_unshiu_01901 | 44689  | 42825  | 1865   | 4.17  | 99.79 |
| chr1 | 8681531 | 8692657 | 11127  | 0.05 | C_unshiu_01901 | 41338  | 30187  | 11152  | 24.95 | 99.38 |
| chr1 | 8699741 | 8715776 | 16036  | 0.07 | C_unshiu_01901 | 29258  | 13234  | 16025  | 35.86 | 98.68 |
| chr1 | 8716250 | 8728985 | 12736  | 0.06 | C_unshiu_01901 | 12741  | 2      | 12740  | 28.51 | 99.1  |
| chr1 | 8732163 | 8791423 | 59261  | 0.26 | C_unshiu_00912 | 4851   | 64127  | 59277  | 51.19 | 99.88 |
| chr1 | 8792597 | 8816135 | 23539  | 0.1  | C_unshiu_01977 | 2344   | 25882  | 23539  | 56.88 | 99.85 |
| chr1 | 8818529 | 8820348 | 1820   | 0.01 | C_unshiu_02638 | 13798  | 15620  | 1823   | 8.61  | 99.84 |
| chr1 | 8831362 | 8851664 | 20303  | 0.09 | C_unshiu_01815 | 13     | 20243  | 20231  | 42.17 | 98.94 |
| chr1 | 8848768 | 8852606 | 3839   | 0.02 | C_unshiu_00698 | 83010  | 86853  | 3844   | 2.67  | 98.99 |
| chr1 | 8852772 | 8856070 | 3299   | 0.01 | C_unshiu_01815 | 22894  | 26177  | 3284   | 6.85  | 98.58 |
| chr1 | 8857393 | 8861952 | 4560   | 0.02 | C_unshiu_00698 | 92767  | 97324  | 4558   | 3.17  | 98.86 |
| chr1 | 8862346 | 8865139 | 2794   | 0.01 | C_unshiu_00698 | 97440  | 100234 | 2795   | 1.94  | 99.18 |
| chr1 | 8871168 | 8892377 | 21210  | 0.09 | C_unshiu_00698 | 105943 | 127143 | 21201  | 14.74 | 99.92 |
| chr1 | 8892267 | 8908623 | 16357  | 0.07 | C_unshiu_00698 | 127101 | 143511 | 16411  | 11.41 | 99.31 |
| chr1 | 8914208 | 8919756 | 5549   | 0.02 | C_unshiu_00452 | 72107  | 77655  | 5549   | 2.68  | 99.73 |
| chr1 | 8919164 | 8987883 | 68720  | 0.31 | C_unshiu_00452 | 77185  | 145905 | 68721  | 33.19 | 99.95 |
| chr1 | 8984978 | 9102111 | 117134 | 0.52 | C_unshiu_00282 | 7175   | 124306 | 117132 | 42.4  | 99.92 |
| chr1 | 9082094 | 9116854 | 34761  | 0.15 | C_unshiu_00282 | 104256 | 139049 | 34794  | 12.6  | 99.91 |
| chr1 | 9131043 | 9190746 | 59704  | 0.27 | C_unshiu_00282 | 156489 | 216195 | 59707  | 21.61 | 99.99 |
| chr1 | 9192794 | 9274068 | 81275  | 0.36 | C_unshiu_00108 | 446083 | 364824 | 81260  | 18.21 | 99.92 |
| chr1 | 9279343 | 9281043 | 1701   | 0.01 | C_unshiu_00108 | 359934 | 358229 | 1706   | 0.38  | 98.83 |
| chr1 | 9281895 | 9317714 | 35820  | 0.16 | C_unshiu_00108 | 356888 | 321043 | 35846  | 8.03  | 99.82 |
| chr1 | 9317743 | 9326427 | 8685   | 0.04 | C_unshiu_00108 | 320746 | 312062 | 8685   | 1.95  | 100   |
| chr1 | 9326424 | 9352455 | 26032  | 0.12 | C_unshiu_00108 | 311686 | 285636 | 26051  | 5.84  | 99.92 |
| chr1 | 9352447 | 9429813 | 77367  | 0.34 | C_unshiu_00108 | 285557 | 208186 | 77372  | 17.34 | 99.99 |
| chr1 | 9437256 | 9467369 | 30114  | 0.13 | C_unshiu_01350 | 471    | 30575  | 30105  | 40.6  | 99.94 |
| chr1 | 9469689 | 9479698 | 10010  | 0.04 | C_unshiu_00483 | 1      | 10009  | 10009  | 5.07  | 99.97 |

|      |          |          |        |      |                |        |        |        |       |       |
|------|----------|----------|--------|------|----------------|--------|--------|--------|-------|-------|
| chr1 | 9483928  | 9527353  | 43426  | 0.19 | C_unshiu_00483 | 16911  | 60309  | 43399  | 21.99 | 99.93 |
| chr1 | 9528711  | 9585729  | 57019  | 0.25 | C_unshiu_00483 | 61417  | 118428 | 57012  | 28.89 | 99.98 |
| chr1 | 9585578  | 9661632  | 76055  | 0.34 | C_unshiu_00483 | 118327 | 194381 | 76055  | 38.54 | 99.97 |
| chr1 | 9661762  | 9698429  | 36668  | 0.16 | C_unshiu_00327 | 1917   | 38606  | 36690  | 14.46 | 99.8  |
| chr1 | 9699170  | 9700188  | 1019   | 0    | C_unshiu_01720 | 33253  | 34271  | 1019   | 1.97  | 100   |
| chr1 | 9704467  | 9704446  | 1980   | 0.01 | C_unshiu_01299 | 17624  | 15645  | 1980   | 2.55  | 100   |
| chr1 | 9706447  | 9740630  | 34184  | 0.15 | C_unshiu_00327 | 43846  | 78039  | 34194  | 13.47 | 99.9  |
| chr1 | 9743023  | 9783006  | 39984  | 0.18 | C_unshiu_00327 | 79615  | 119499 | 39885  | 15.71 | 99.53 |
| chr1 | 9782742  | 9856095  | 73354  | 0.33 | C_unshiu_00327 | 119586 | 192932 | 73347  | 28.9  | 99.86 |
| chr1 | 9857026  | 9864756  | 7731   | 0.03 | C_unshiu_00327 | 193962 | 201696 | 7735   | 3.05  | 99.88 |
| chr1 | 9865550  | 9911188  | 45639  | 0.2  | C_unshiu_00327 | 202900 | 248519 | 45620  | 17.97 | 99.71 |
| chr1 | 9927624  | 9933408  | 5785   | 0.03 | C_unshiu_00124 | 13463  | 19247  | 5785   | 1.38  | 99.95 |
| chr1 | 9934014  | 9939723  | 5710   | 0.03 | C_unshiu_00124 | 20247  | 25957  | 5711   | 1.36  | 99.81 |
| chr1 | 9939740  | 9941613  | 1874   | 0.01 | C_unshiu_00124 | 27937  | 29800  | 1864   | 0.44  | 98.99 |
| chr1 | 9942140  | 9943970  | 1831   | 0.01 | C_unshiu_00124 | 30862  | 32692  | 1831   | 0.44  | 100   |
| chr1 | 9944488  | 9948036  | 3549   | 0.02 | C_unshiu_00124 | 33406  | 36954  | 3549   | 0.85  | 99.92 |
| chr1 | 9948046  | 9956333  | 8288   | 0.04 | C_unshiu_00124 | 37392  | 45678  | 8287   | 1.98  | 99.88 |
| chr1 | 9956468  | 9959747  | 3280   | 0.01 | C_unshiu_00124 | 46026  | 49307  | 3282   | 0.78  | 99.82 |
| chr1 | 9959863  | 9973693  | 13831  | 0.06 | C_unshiu_01477 | 64610  | 50714  | 13897  | 21.5  | 98.61 |
| chr1 | 9973934  | 9977763  | 3830   | 0.02 | C_unshiu_01477 | 50152  | 46323  | 3830   | 5.92  | 99.56 |
| chr1 | 10004267 | 10005333 | 1067   | 0    | C_unshiu_00784 | 100665 | 101731 | 1067   | 0.82  | 100   |
| chr1 | 10009564 | 10032113 | 22550  | 0.1  | C_unshiu_00429 | 208001 | 185429 | 22573  | 10.45 | 99.25 |
| chr1 | 10032535 | 10067370 | 34836  | 0.15 | C_unshiu_00429 | 184664 | 149855 | 34810  | 16.12 | 99.91 |
| chr1 | 10068749 | 10127219 | 58471  | 0.26 | C_unshiu_00429 | 148690 | 90204  | 58487  | 27.08 | 99.97 |
| chr1 | 10129409 | 10134448 | 5040   | 0.02 | C_unshiu_00429 | 87096  | 82057  | 5040   | 2.33  | 99.94 |
| chr1 | 10135421 | 10168673 | 33253  | 0.15 | C_unshiu_00429 | 79968  | 46709  | 33260  | 15.4  | 99.9  |
| chr1 | 10166438 | 10185461 | 19024  | 0.08 | C_unshiu_01758 | 1      | 19025  | 19025  | 38.05 | 99.97 |
| chr1 | 10195307 | 10196539 | 1233   | 0.01 | C_unshiu_00159 | 254918 | 256150 | 1233   | 0.33  | 100   |
| chr1 | 10199096 | 10200484 | 1389   | 0.01 | C_unshiu_00063 | 472400 | 473788 | 1389   | 0.25  | 100   |
| chr1 | 10203608 | 10234196 | 30589  | 0.14 | C_unshiu_00063 | 477971 | 508547 | 30577  | 5.46  | 99.92 |
| chr1 | 10238613 | 10240002 | 1390   | 0.01 | C_unshiu_01098 | 62328  | 63714  | 1387   | 1.44  | 98.13 |
| chr1 | 10265412 | 10274901 | 9490   | 0.04 | C_unshiu_00426 | 217135 | 207635 | 9501   | 4.38  | 99.32 |
| chr1 | 10275786 | 10279601 | 3816   | 0.02 | C_unshiu_00426 | 206329 | 202515 | 3815   | 1.76  | 99.55 |
| chr1 | 10281642 | 10304568 | 22927  | 0.1  | C_unshiu_00426 | 199940 | 177035 | 22906  | 10.55 | 99.22 |
| chr1 | 10307858 | 10309044 | 1187   | 0.01 | C_unshiu_00426 | 173023 | 171837 | 1187   | 0.55  | 100   |
| chr1 | 10309145 | 10319909 | 10765  | 0.05 | C_unshiu_00087 | 176952 | 166187 | 10766  | 2.29  | 99.31 |
| chr1 | 10325242 | 10492206 | 166965 | 0.74 | C_unshiu_00087 | 167040 | 1      | 167040 | 35.49 | 99.92 |
| chr1 | 10488019 | 10541779 | 53761  | 0.24 | C_unshiu_01200 | 80254  | 26448  | 53807  | 62.8  | 99.89 |
| chr1 | 10542005 | 10568173 | 26169  | 0.12 | C_unshiu_01200 | 26177  | 10     | 26168  | 30.54 | 99.98 |
| chr1 | 10587590 | 10649099 | 61510  | 0.27 | C_unshiu_00191 | 211357 | 149847 | 61511  | 17.87 | 99.99 |
| chr1 | 10649339 | 10685264 | 35926  | 0.16 | C_unshiu_00191 | 149175 | 113250 | 35926  | 10.44 | 100   |
| chr1 | 10687357 | 10689513 | 2157   | 0.01 | C_unshiu_00191 | 110646 | 108490 | 2157   | 0.63  | 99.49 |
| chr1 | 10690779 | 10725371 | 34593  | 0.15 | C_unshiu_00191 | 108507 | 73903  | 34605  | 10.05 | 99.43 |
| chr1 | 10725872 | 10739320 | 13449  | 0.06 | C_unshiu_00191 | 75220  | 61772  | 13449  | 3.91  | 99.99 |
| chr1 | 10739290 | 10769029 | 29740  | 0.13 | C_unshiu_00191 | 61719  | 31990  | 29730  | 8.64  | 99.92 |
| chr1 | 10769022 | 10774757 | 5736   | 0.03 | C_unshiu_00164 | 236596 | 242331 | 5736   | 1.55  | 100   |
| chr1 | 10774825 | 10781585 | 6761   | 0.03 | C_unshiu_00191 | 25650  | 18897  | 6754   | 1.96  | 99    |
| chr1 | 10782345 | 10799393 | 17049  | 0.08 | C_unshiu_00191 | 17049  | 1      | 17049  | 4.95  | 100   |
| chr1 | 10796124 | 10829725 | 33602  | 0.15 | C_unshiu_00687 | 4708   | 38299  | 33592  | 22.9  | 99.67 |
| chr1 | 10829052 | 10839701 | 10650  | 0.05 | C_unshiu_00687 | 37809  | 48437  | 10629  | 7.24  | 98.13 |
| chr1 | 10848977 | 10854656 | 5680   | 0.03 | C_unshiu_01076 | 1696   | 7376   | 5681   | 5.79  | 99.95 |
| chr1 | 10857914 | 10873051 | 15138  | 0.07 | C_unshiu_01076 | 18724  | 33866  | 15143  | 15.43 | 99.01 |
| chr1 | 10887644 | 10900068 | 12425  | 0.06 | C_unshiu_01076 | 42981  | 55444  | 12464  | 12.7  | 98.81 |
| chr1 | 10902928 | 10934666 | 31739  | 0.14 | C_unshiu_01076 | 57181  | 88874  | 31694  | 32.29 | 98.43 |
| chr1 | 10928871 | 10934666 | 5796   | 0.03 | C_unshiu_00772 | 16529  | 22336  | 5808   | 4.39  | 98.51 |
| chr1 | 10936496 | 10937669 | 1174   | 0.01 | C_unshiu_00772 | 10249  | 9082   | 1168   | 0.88  | 98.05 |
| chr1 | 10939042 | 10945942 | 6901   | 0.03 | C_unshiu_01076 | 91269  | 98167  | 6899   | 7.03  | 98.13 |
| chr1 | 10945475 | 10959988 | 14514  | 0.06 | C_unshiu_00772 | 31272  | 45807  | 14536  | 10.98 | 99.47 |
| chr1 | 10967867 | 10969398 | 1532   | 0.01 | C_unshiu_00142 | 394210 | 392680 | 1531   | 0.38  | 99.74 |
| chr1 | 10977141 | 10994864 | 17724  | 0.08 | C_unshiu_00142 | 385111 | 367331 | 17781  | 4.45  | 99.02 |
| chr1 | 11006378 | 11009649 | 3272   | 0.01 | C_unshiu_00142 | 354941 | 351670 | 3272   | 0.82  | 100   |
| chr1 | 11017671 | 11021484 | 3814   | 0.02 | C_unshiu_00142 | 340223 | 336425 | 3799   | 0.95  | 98.82 |
| chr1 | 11021519 | 11043281 | 21763  | 0.1  | C_unshiu_00142 | 336289 | 314521 | 21769  | 5.45  | 98.36 |
| chr1 | 11044444 | 11045853 | 1410   | 0.01 | C_unshiu_00142 | 312238 | 310829 | 1410   | 0.35  | 100   |
| chr1 | 11050583 | 11067072 | 16490  | 0.07 | C_unshiu_00142 | 305517 | 288992 | 16526  | 4.13  | 98.61 |
| chr1 | 11071124 | 11085915 | 14792  | 0.07 | C_unshiu_02242 | 4105   | 18755  | 14651  | 45.78 | 98.23 |
| chr1 | 11102043 | 11120519 | 18477  | 0.08 | C_unshiu_00142 | 269896 | 251361 | 18536  | 4.64  | 98.18 |
| chr1 | 11156919 | 11159455 | 2537   | 0.01 | C_unshiu_00142 | 212308 | 209770 | 2539   | 0.64  | 99.25 |
| chr1 | 11167802 | 11192237 | 24436  | 0.11 | C_unshiu_00142 | 208228 | 183787 | 24442  | 6.12  | 99.72 |
| chr1 | 11201044 | 11205146 | 4103   | 0.02 | C_unshiu_02005 | 11746  | 15860  | 4115   | 10.16 | 98.49 |
| chr1 | 11209862 | 11211518 | 1657   | 0.01 | C_unshiu_01280 | 67577  | 65909  | 1669   | 2.12  | 98.56 |
| chr1 | 11216240 | 11222452 | 6213   | 0.03 | C_unshiu_00697 | 14701  | 20897  | 6197   | 4.3   | 99.39 |
| chr1 | 11222464 | 11225281 | 2818   | 0.01 | C_unshiu_00697 | 21084  | 23903  | 2820   | 1.96  | 99.75 |
| chr1 | 11225282 | 11227328 | 2047   | 0.01 | C_unshiu_00697 | 1356   | 3402   | 2047   | 1.42  | 99.56 |
| chr1 | 11227827 | 11229677 | 1851   | 0.01 | C_unshiu_02005 | 31701  | 33546  | 1846   | 4.56  | 99.41 |
| chr1 | 11234077 | 11235832 | 1756   | 0.01 | C_unshiu_00697 | 10252  | 12011  | 1760   | 1.22  | 99.6  |
| chr1 | 11236976 | 11238361 | 1386   | 0.01 | C_unshiu_00928 | 1010   | 2395   | 1386   | 1.22  | 100   |
| chr1 | 11244658 | 11247185 | 2528   | 0.01 | C_unshiu_00928 | 9525   | 12053  | 2529   | 2.22  | 99.92 |
| chr1 | 11247181 | 11249498 | 2318   | 0.01 | C_unshiu_00928 | 12295  | 14619  | 2325   | 2.04  | 99.14 |

|      |          |          |       |      |                |        |        |       |       |       |
|------|----------|----------|-------|------|----------------|--------|--------|-------|-------|-------|
| chr1 | 11271725 | 11273261 | 1537  | 0.01 | C_unshiu_00928 | 37604  | 39158  | 1555  | 1.37  | 98.65 |
| chr1 | 11277289 | 11284750 | 7462  | 0.03 | C_unshiu_00928 | 42236  | 49699  | 7464  | 6.56  | 99.6  |
| chr1 | 11285181 | 11287165 | 1985  | 0.01 | C_unshiu_00928 | 50466  | 52448  | 1983  | 1.74  | 99.29 |
| chr1 | 11288457 | 11291764 | 3308  | 0.01 | C_unshiu_00458 | 57696  | 54372  | 3325  | 1.62  | 98.77 |
| chr1 | 11299355 | 11300693 | 1339  | 0.01 | C_unshiu_00458 | 52159  | 50818  | 1342  | 0.65  | 99.33 |
| chr1 | 11301152 | 11302760 | 1609  | 0.01 | C_unshiu_00458 | 50093  | 48485  | 1609  | 0.78  | 100   |
| chr1 | 11305589 | 11315988 | 10400 | 0.05 | C_unshiu_00458 | 38734  | 28276  | 10459 | 5.1   | 99.04 |
| chr1 | 11317350 | 11321429 | 4080  | 0.02 | C_unshiu_00458 | 42826  | 38758  | 4069  | 1.98  | 98.34 |
| chr1 | 11325077 | 11327389 | 2313  | 0.01 | C_unshiu_00458 | 5395   | 3083   | 2313  | 1.13  | 100   |
| chr1 | 11347672 | 11354413 | 6742  | 0.03 | C_unshiu_00928 | 69657  | 76357  | 6701  | 5.89  | 98.09 |
| chr1 | 11366523 | 11371607 | 5085  | 0.02 | C_unshiu_00928 | 87178  | 92265  | 5088  | 4.47  | 98.74 |
| chr1 | 11371630 | 11390414 | 18785 | 0.08 | C_unshiu_00928 | 91355  | 110114 | 18760 | 16.48 | 98.56 |
| chr1 | 11392762 | 11393969 | 1208  | 0.01 | C_unshiu_01217 | 14035  | 15242  | 1208  | 1.44  | 100   |
| chr1 | 11394996 | 11425517 | 30522 | 0.14 | C_unshiu_01217 | 17029  | 47554  | 30526 | 36.34 | 99.94 |
| chr1 | 11427388 | 11438885 | 11498 | 0.05 | C_unshiu_01217 | 50329  | 61825  | 11497 | 13.69 | 99.99 |
| chr1 | 11438953 | 11456732 | 17780 | 0.08 | C_unshiu_01217 | 62221  | 80000  | 17780 | 21.17 | 100   |
| chr1 | 11460708 | 11519038 | 58331 | 0.26 | C_unshiu_00187 | 305553 | 247213 | 58341 | 16.86 | 99.98 |
| chr1 | 11499006 | 11559010 | 60005 | 0.27 | C_unshiu_00187 | 267253 | 207179 | 60075 | 17.36 | 99.85 |
| chr1 | 11559164 | 11593222 | 34059 | 0.15 | C_unshiu_00187 | 206192 | 172110 | 34083 | 9.85  | 99.93 |
| chr1 | 11593752 | 11661314 | 67563 | 0.3  | C_unshiu_00187 | 171494 | 103955 | 67540 | 19.52 | 99.93 |
| chr1 | 11663756 | 11708116 | 44361 | 0.2  | C_unshiu_00187 | 103494 | 59134  | 44361 | 12.82 | 99.91 |
| chr1 | 11709987 | 11748919 | 38933 | 0.17 | C_unshiu_00187 | 56798  | 17864  | 38935 | 11.25 | 99.96 |
| chr1 | 11754009 | 11764495 | 10487 | 0.05 | C_unshiu_00187 | 14094  | 3567   | 10528 | 3.04  | 99.57 |
| chr1 | 11785442 | 11807916 | 22475 | 0.1  | C_unshiu_00721 | 32014  | 9531   | 22484 | 15.91 | 99.03 |
| chr1 | 11822701 | 11824065 | 1365  | 0.01 | C_unshiu_00800 | 44979  | 46343  | 1365  | 1.06  | 98.17 |
| chr1 | 11838247 | 11839307 | 1061  | 0    | C_unshiu_01396 | 1      | 1061   | 1061  | 1.5   | 100   |
| chr1 | 11865835 | 11868559 | 2725  | 0.01 | C_unshiu_00210 | 291478 | 288715 | 2764  | 0.84  | 98.23 |
| chr1 | 11872943 | 11873966 | 1024  | 0    | C_unshiu_00210 | 284548 | 283525 | 1024  | 0.31  | 99.71 |
| chr1 | 11877798 | 11917691 | 39894 | 0.18 | C_unshiu_00210 | 279609 | 239736 | 39874 | 12.17 | 99.05 |
| chr1 | 11908041 | 11918254 | 10214 | 0.05 | C_unshiu_00210 | 249388 | 239183 | 10206 | 3.12  | 99.06 |
| chr1 | 11921249 | 11951783 | 30535 | 0.14 | C_unshiu_01237 | 1      | 30532  | 30532 | 37.32 | 99.49 |
| chr1 | 11951777 | 11976141 | 24365 | 0.11 | C_unshiu_01237 | 31176  | 55572  | 24397 | 29.82 | 99.48 |
| chr1 | 11984384 | 11987005 | 2622  | 0.01 | C_unshiu_01237 | 59346  | 61971  | 2626  | 3.21  | 99.39 |
| chr1 | 11993022 | 12003536 | 10515 | 0.05 | C_unshiu_01237 | 61885  | 72395  | 10511 | 12.85 | 99.24 |
| chr1 | 12003651 | 12012531 | 8881  | 0.04 | C_unshiu_01237 | 72935  | 81818  | 8884  | 10.86 | 99.82 |
| chr1 | 12008096 | 12017784 | 9689  | 0.04 | C_unshiu_02698 | 11914  | 2220   | 9695  | 48.75 | 99.71 |
| chr1 | 12018108 | 12032742 | 14635 | 0.07 | C_unshiu_01712 | 835    | 15486  | 14652 | 28.18 | 99.53 |
| chr1 | 12034800 | 12042932 | 8133  | 0.04 | C_unshiu_01712 | 15483  | 23651  | 8169  | 15.71 | 99.14 |
| chr1 | 12044309 | 12045651 | 1343  | 0.01 | C_unshiu_01712 | 25410  | 26754  | 1345  | 2.59  | 99.18 |
| chr1 | 12047984 | 12050689 | 2706  | 0.01 | C_unshiu_01712 | 28589  | 31291  | 2703  | 5.2   | 99.15 |
| chr1 | 12058305 | 12060851 | 2547  | 0.01 | C_unshiu_01256 | 70442  | 67921  | 2522  | 3.14  | 98.39 |
| chr1 | 12061499 | 12062860 | 1362  | 0.01 | C_unshiu_01256 | 67162  | 65801  | 1362  | 1.69  | 99.85 |
| chr1 | 12062858 | 12071311 | 8454  | 0.04 | C_unshiu_01256 | 65442  | 56965  | 8478  | 10.54 | 98.89 |
| chr1 | 12073380 | 12080906 | 7527  | 0.03 | C_unshiu_01256 | 54009  | 46483  | 7527  | 9.36  | 99.99 |
| chr1 | 12086655 | 12088684 | 2030  | 0.01 | C_unshiu_01256 | 39827  | 37802  | 2026  | 2.52  | 99.31 |
| chr1 | 12089301 | 12090764 | 1464  | 0.01 | C_unshiu_01256 | 37270  | 35814  | 1457  | 1.81  | 98.37 |
| chr1 | 12100895 | 12102063 | 1169  | 0.01 | C_unshiu_00822 | 36144  | 34976  | 1169  | 0.93  | 98.2  |
| chr1 | 12110283 | 12129873 | 19591 | 0.09 | C_unshiu_02084 | 5407   | 24945  | 19539 | 52.57 | 98.81 |
| chr1 | 12140126 | 12143791 | 3666  | 0.02 | C_unshiu_01816 | 44217  | 47872  | 3656  | 7.64  | 99.51 |
| chr1 | 12148045 | 12151293 | 3249  | 0.01 | C_unshiu_01720 | 36152  | 39403  | 3252  | 6.27  | 99.88 |
| chr1 | 12151326 | 12162999 | 11674 | 0.05 | C_unshiu_01720 | 39304  | 50915  | 11612 | 22.4  | 98.87 |
| chr1 | 12177006 | 12179111 | 2106  | 0.01 | C_unshiu_00637 | 52021  | 54126  | 2106  | 1.32  | 100   |
| chr1 | 12193513 | 12202115 | 8603  | 0.04 | C_unshiu_00462 | 143508 | 152108 | 8601  | 4.22  | 99.85 |
| chr1 | 12203879 | 12213918 | 10040 | 0.04 | C_unshiu_00462 | 157855 | 167894 | 10040 | 4.93  | 100   |
| chr1 | 12216317 | 12228372 | 12056 | 0.05 | C_unshiu_00462 | 169489 | 181544 | 12056 | 5.92  | 99.92 |
| chr1 | 12231753 | 12241977 | 10225 | 0.05 | C_unshiu_00462 | 183860 | 194086 | 10227 | 5.02  | 99.78 |
| chr1 | 12249890 | 12265814 | 15925 | 0.07 | C_unshiu_02834 | 15865  | 1      | 15865 | 93.02 | 99.17 |
| chr1 | 12273110 | 12278542 | 5433  | 0.02 | C_unshiu_01256 | 54     | 5486   | 5433  | 6.75  | 100   |
| chr1 | 12279357 | 12282721 | 3365  | 0.01 | C_unshiu_01256 | 6622   | 9987   | 3366  | 4.18  | 99.76 |
| chr1 | 12285509 | 12287402 | 1894  | 0.01 | C_unshiu_02084 | 27934  | 29827  | 1894  | 5.1   | 99.89 |
| chr1 | 12287997 | 12289661 | 1665  | 0.01 | C_unshiu_02084 | 30874  | 32538  | 1665  | 4.48  | 99.82 |
| chr1 | 12290943 | 12363724 | 72782 | 0.32 | C_unshiu_00954 | 105263 | 32325  | 72939 | 65.67 | 99.12 |
| chr1 | 12365084 | 12366089 | 1006  | 0    | C_unshiu_00669 | 106787 | 105783 | 1005  | 0.66  | 98.31 |
| chr1 | 12366530 | 12374998 | 8469  | 0.04 | C_unshiu_00954 | 27801  | 19309  | 8493  | 7.65  | 99.14 |
| chr1 | 12375132 | 12380784 | 5653  | 0.03 | C_unshiu_00954 | 19309  | 13682  | 5628  | 5.07  | 99.03 |
| chr1 | 12380857 | 12388546 | 7690  | 0.03 | C_unshiu_00954 | 13583  | 5892   | 7692  | 6.92  | 99.69 |
| chr1 | 12395563 | 12410926 | 15364 | 0.07 | C_unshiu_00894 | 49177  | 33793  | 15385 | 13.07 | 99.35 |
| chr1 | 12416341 | 12422522 | 6182  | 0.03 | C_unshiu_00894 | 28540  | 22369  | 6172  | 5.24  | 98.36 |
| chr1 | 12422627 | 12424460 | 1834  | 0.01 | C_unshiu_00107 | 77750  | 79587  | 1838  | 0.41  | 98.8  |
| chr1 | 12426734 | 12428874 | 2141  | 0.01 | C_unshiu_00174 | 99484  | 97344  | 2141  | 0.59  | 99.72 |
| chr1 | 12429298 | 12447814 | 18517 | 0.08 | C_unshiu_00174 | 97143  | 78678  | 18466 | 5.07  | 99.44 |
| chr1 | 12447850 | 12462813 | 14964 | 0.07 | C_unshiu_00174 | 78171  | 63182  | 14990 | 4.12  | 99.21 |
| chr1 | 12466538 | 12488246 | 21709 | 0.1  | C_unshiu_00174 | 60074  | 38337  | 21738 | 5.97  | 99.3  |
| chr1 | 12497024 | 12499890 | 2867  | 0.01 | C_unshiu_00866 | 97099  | 99964  | 2866  | 2.37  | 99.97 |
| chr1 | 12511968 | 12514024 | 2057  | 0.01 | C_unshiu_02507 | 22056  | 20000  | 2057  | 8.41  | 98.06 |
| chr1 | 12515064 | 12518963 | 3900  | 0.02 | C_unshiu_00263 | 213039 | 216938 | 3900  | 1.37  | 100   |
| chr1 | 12528517 | 12532718 | 4202  | 0.02 | C_unshiu_02507 | 17654  | 13455  | 4200  | 17.17 | 98.86 |
| chr1 | 12533234 | 12541794 | 8561  | 0.04 | C_unshiu_02507 | 12436  | 3822   | 8615  | 35.23 | 98.41 |
| chr1 | 12541918 | 12544192 | 2275  | 0.01 | C_unshiu_02507 | 3657   | 1389   | 2269  | 9.28  | 98.95 |

|      |          |          |       |      |                |        |        |       |       |       |
|------|----------|----------|-------|------|----------------|--------|--------|-------|-------|-------|
| chr1 | 12575371 | 12606565 | 31195 | 0.14 | C_unshiu_00766 | 68785  | 37574  | 31212 | 23.37 | 99.38 |
| chr1 | 12606581 | 12609026 | 2446  | 0.01 | C_unshiu_00937 | 26981  | 24536  | 2446  | 2.16  | 99.8  |
| chr1 | 12630320 | 12665423 | 35104 | 0.16 | C_unshiu_01449 | 7      | 35260  | 35254 | 52.95 | 98.63 |
| chr1 | 12677471 | 12681046 | 3576  | 0.02 | C_unshiu_00473 | 64536  | 60959  | 3578  | 1.78  | 99.47 |
| chr1 | 12681047 | 12683180 | 2134  | 0.01 | C_unshiu_00473 | 60860  | 58726  | 2135  | 1.06  | 99.02 |
| chr1 | 12696473 | 12698823 | 2351  | 0.01 | C_unshiu_00473 | 44971  | 42641  | 2331  | 1.16  | 98.51 |
| chr1 | 12699038 | 12703204 | 4167  | 0.02 | C_unshiu_00473 | 42642  | 38442  | 4201  | 2.09  | 98.05 |
| chr1 | 12703307 | 12712129 | 8823  | 0.04 | C_unshiu_00473 | 37920  | 29071  | 8850  | 4.4   | 98.48 |
| chr1 | 12712965 | 12714317 | 1353  | 0.01 | C_unshiu_01435 | 24336  | 25682  | 1347  | 1.98  | 98.08 |
| chr1 | 12714311 | 12715869 | 1559  | 0.01 | C_unshiu_00484 | 36289  | 37847  | 1559  | 0.79  | 100   |
| chr1 | 12717614 | 12720396 | 2783  | 0.01 | C_unshiu_00473 | 24247  | 21464  | 2784  | 1.39  | 99.17 |
| chr1 | 12729777 | 12738795 | 9019  | 0.04 | C_unshiu_00473 | 12631  | 3600   | 9032  | 4.49  | 98.6  |
| chr1 | 12739580 | 12751696 | 12117 | 0.05 | C_unshiu_01483 | 3472   | 15604  | 12133 | 18.93 | 98.18 |
| chr1 | 12755310 | 12765520 | 10211 | 0.05 | C_unshiu_00458 | 201288 | 191075 | 10214 | 4.98  | 98.4  |
| chr1 | 12766054 | 12767972 | 1919  | 0.01 | C_unshiu_00458 | 190585 | 188666 | 1920  | 0.94  | 99.12 |
| chr1 | 12770870 | 12778061 | 7192  | 0.03 | C_unshiu_00458 | 185407 | 178182 | 7226  | 3.52  | 98.82 |
| chr1 | 12778042 | 12784236 | 6195  | 0.03 | C_unshiu_00458 | 178150 | 171931 | 6220  | 3.03  | 98.06 |
| chr1 | 12785265 | 12789539 | 4275  | 0.02 | C_unshiu_00458 | 170560 | 166348 | 4213  | 2.05  | 98.29 |
| chr1 | 12813847 | 12819004 | 5158  | 0.02 | C_unshiu_00171 | 309662 | 314820 | 5159  | 1.41  | 99.9  |
| chr1 | 12832152 | 12838323 | 6172  | 0.03 | C_unshiu_00171 | 327301 | 333517 | 6217  | 1.69  | 98.76 |
| chr1 | 12839958 | 12857159 | 17202 | 0.08 | C_unshiu_00171 | 338356 | 355465 | 17110 | 4.66  | 98.12 |
| chr1 | 12858453 | 12860496 | 2044  | 0.01 | C_unshiu_01564 | 40189  | 38146  | 2044  | 3.43  | 98.73 |
| chr1 | 12863482 | 12865021 | 1540  | 0.01 | C_unshiu_00171 | 359760 | 361299 | 1540  | 0.42  | 98.12 |
| chr1 | 12865387 | 12868918 | 3532  | 0.02 | C_unshiu_01564 | 33926  | 30361  | 3566  | 5.99  | 98.57 |
| chr1 | 12868404 | 12872889 | 4486  | 0.02 | C_unshiu_02582 | 21391  | 16902  | 4490  | 19.93 | 99.18 |
| chr1 | 12872389 | 12877128 | 4740  | 0.02 | C_unshiu_01564 | 30804  | 26067  | 4738  | 7.96  | 98.34 |
| chr1 | 12872957 | 12886489 | 13533 | 0.06 | C_unshiu_02582 | 16338  | 2821   | 13518 | 59.99 | 98.98 |
| chr1 | 12892399 | 12894463 | 2065  | 0.01 | C_unshiu_02582 | 2370   | 304    | 2067  | 9.17  | 98.89 |
| chr1 | 12919649 | 12922280 | 2632  | 0.01 | C_unshiu_01564 | 3471   | 840    | 2632  | 4.42  | 99.96 |
| chr1 | 12924855 | 12929206 | 4352  | 0.02 | C_unshiu_01918 | 39539  | 35184  | 4356  | 9.9   | 98.92 |
| chr1 | 12930702 | 12931846 | 1145  | 0.01 | C_unshiu_01918 | 32764  | 33915  | 1152  | 2.62  | 98.35 |
| chr1 | 12931838 | 12940471 | 8634  | 0.04 | C_unshiu_01918 | 32760  | 24115  | 8646  | 19.65 | 98.98 |
| chr1 | 12941284 | 12944130 | 2847  | 0.01 | C_unshiu_01918 | 21237  | 18388  | 2850  | 6.48  | 98.84 |
| chr1 | 12970357 | 12973981 | 3625  | 0.02 | C_unshiu_01891 | 15517  | 19139  | 3623  | 8.05  | 98.05 |
| chr1 | 12984909 | 12990631 | 5723  | 0.03 | C_unshiu_00298 | 265130 | 259422 | 5709  | 2.14  | 98.73 |
| chr1 | 13006288 | 13009743 | 3456  | 0.02 | C_unshiu_01017 | 35780  | 32325  | 3456  | 3.31  | 100   |
| chr1 | 13009735 | 13019960 | 10226 | 0.05 | C_unshiu_00298 | 216222 | 205964 | 10259 | 3.85  | 98.4  |
| chr1 | 13037230 | 13073761 | 36532 | 0.16 | C_unshiu_01725 | 15265  | 51762  | 36498 | 70.51 | 99.8  |
| chr1 | 13079049 | 13091034 | 11986 | 0.05 | C_unshiu_01516 | 2458   | 14480  | 12023 | 19.28 | 99.44 |
| chr1 | 13091776 | 13104090 | 12315 | 0.05 | C_unshiu_01516 | 15784  | 28106  | 12323 | 19.76 | 99.53 |
| chr1 | 13105075 | 13106355 | 1281  | 0.01 | C_unshiu_01516 | 29579  | 30860  | 1282  | 2.06  | 99.92 |
| chr1 | 13115067 | 13132945 | 17879 | 0.08 | C_unshiu_02118 | 33384  | 15425  | 17960 | 49.97 | 99.09 |
| chr1 | 13132944 | 13136924 | 3981  | 0.02 | C_unshiu_02118 | 14959  | 10987  | 3973  | 11.05 | 99.07 |
| chr1 | 13149274 | 13151162 | 1889  | 0.01 | C_unshiu_02118 | 3402   | 1522   | 1881  | 5.23  | 99    |
| chr1 | 13156520 | 13215403 | 58884 | 0.26 | C_unshiu_00395 | 4134   | 63048  | 58915 | 26.33 | 99.39 |
| chr1 | 13215416 | 13223022 | 7607  | 0.03 | C_unshiu_00395 | 63359  | 70989  | 7631  | 3.41  | 99.15 |
| chr1 | 13224505 | 13228463 | 3959  | 0.02 | C_unshiu_00395 | 71171  | 75152  | 3982  | 1.78  | 99.12 |
| chr1 | 13228923 | 13232012 | 3090  | 0.01 | C_unshiu_00824 | 68681  | 65592  | 3090  | 2.45  | 100   |
| chr1 | 13232014 | 13253991 | 21978 | 0.1  | C_unshiu_00395 | 78542  | 100514 | 21973 | 9.82  | 99.21 |
| chr1 | 13253992 | 13258165 | 4174  | 0.02 | C_unshiu_01365 | 21660  | 17487  | 4174  | 5.69  | 100   |
| chr1 | 13258161 | 13282957 | 24797 | 0.11 | C_unshiu_00395 | 104121 | 128908 | 24788 | 11.08 | 99.27 |
| chr1 | 13293239 | 13294947 | 1709  | 0.01 | C_unshiu_00487 | 11928  | 13639  | 1712  | 0.87  | 99.01 |
| chr1 | 13294948 | 13295983 | 1036  | 0    | C_unshiu_01934 | 27120  | 26085  | 1036  | 2.39  | 100   |
| chr1 | 13298668 | 13299807 | 1140  | 0.01 | C_unshiu_00487 | 14750  | 15908  | 1159  | 0.59  | 98.02 |
| chr1 | 13307316 | 13308925 | 1610  | 0.01 | C_unshiu_00487 | 25028  | 26637  | 1610  | 0.82  | 98.01 |
| chr1 | 13308335 | 13352751 | 44417 | 0.2  | C_unshiu_00487 | 26503  | 70912  | 44410 | 22.59 | 99.39 |
| chr1 | 13352750 | 13356155 | 3406  | 0.02 | C_unshiu_00487 | 70980  | 74384  | 3405  | 1.73  | 99.27 |
| chr1 | 13356770 | 13397973 | 41204 | 0.18 | C_unshiu_00487 | 79006  | 120212 | 41207 | 20.96 | 99.3  |
| chr1 | 13394084 | 13397973 | 3890  | 0.02 | C_unshiu_02336 | 28749  | 24853  | 3897  | 13.54 | 98.9  |
| chr1 | 13398895 | 13410119 | 11225 | 0.05 | C_unshiu_02336 | 22988  | 11744  | 11245 | 39.07 | 99.48 |
| chr1 | 13410233 | 13446083 | 35851 | 0.16 | C_unshiu_00487 | 128878 | 164656 | 35779 | 18.2  | 99.35 |
| chr1 | 13450400 | 13453082 | 2683  | 0.01 | C_unshiu_01031 | 9287   | 6601   | 2687  | 2.61  | 98.96 |
| chr1 | 13453436 | 13458647 | 5212  | 0.02 | C_unshiu_00487 | 171621 | 176838 | 5218  | 2.65  | 98.79 |
| chr1 | 13460333 | 13470921 | 10589 | 0.05 | C_unshiu_00487 | 178422 | 189010 | 10589 | 5.39  | 100   |
| chr1 | 13471766 | 13475706 | 3941  | 0.02 | C_unshiu_00487 | 190411 | 194350 | 3940  | 2     | 99.87 |
| chr1 | 13478605 | 13479760 | 1156  | 0.01 | C_unshiu_00157 | 118787 | 117633 | 1155  | 0.31  | 99.22 |
| chr1 | 13479048 | 13481097 | 2050  | 0.01 | C_unshiu_00157 | 117987 | 115925 | 2063  | 0.55  | 98.84 |
| chr1 | 13484546 | 13492535 | 7990  | 0.04 | C_unshiu_00157 | 111926 | 103897 | 8030  | 2.13  | 98.92 |
| chr1 | 13500045 | 13501235 | 1191  | 0.01 | C_unshiu_02281 | 3134   | 4324   | 1191  | 3.93  | 99.66 |
| chr1 | 13503585 | 13507385 | 3801  | 0.02 | C_unshiu_02281 | 5815   | 9615   | 3801  | 12.56 | 98.76 |
| chr1 | 13507483 | 13512909 | 5427  | 0.02 | C_unshiu_02281 | 9696   | 15122  | 5427  | 17.93 | 99.98 |
| chr1 | 13514964 | 13521906 | 6943  | 0.03 | C_unshiu_02281 | 17706  | 24597  | 6892  | 22.77 | 98.23 |
| chr1 | 13528768 | 13539562 | 10795 | 0.05 | C_unshiu_03051 | 627    | 11424  | 10798 | 94.52 | 99.8  |
| chr1 | 13541433 | 13542966 | 1534  | 0.01 | C_unshiu_00157 | 11705  | 10172  | 1534  | 0.41  | 100   |
| chr1 | 13560598 | 13561918 | 1321  | 0.01 | C_unshiu_00964 | 31070  | 29750  | 1321  | 1.2   | 100   |
| chr1 | 13561913 | 13569466 | 7554  | 0.03 | C_unshiu_00142 | 177052 | 169487 | 7566  | 1.89  | 99.46 |
| chr1 | 13570431 | 13572712 | 2282  | 0.01 | C_unshiu_00142 | 167953 | 165670 | 2284  | 0.57  | 99.61 |
| chr1 | 13571513 | 13572898 | 1386  | 0.01 | C_unshiu_00550 | 172085 | 170694 | 1392  | 0.78  | 98.85 |
| chr1 | 13573233 | 13582363 | 9131  | 0.04 | C_unshiu_00142 | 164692 | 155557 | 9136  | 2.29  | 98.42 |

|      |          |          |        |      |                |        |        |        |       |       |
|------|----------|----------|--------|------|----------------|--------|--------|--------|-------|-------|
| chr1 | 13587548 | 13592033 | 4486   | 0.02 | C_unshiu_00142 | 152084 | 147593 | 4492   | 1.12  | 98.4  |
| chr1 | 13590789 | 13593298 | 2510   | 0.01 | C_unshiu_00691 | 95363  | 97843  | 2481   | 1.71  | 98.53 |
| chr1 | 13617475 | 13623657 | 6183   | 0.03 | C_unshiu_00142 | 148669 | 142493 | 6177   | 1.55  | 99.56 |
| chr1 | 13626187 | 13669910 | 43724  | 0.19 | C_unshiu_00142 | 140493 | 96714  | 43780  | 10.95 | 98.8  |
| chr1 | 13670161 | 13693493 | 23333  | 0.1  | C_unshiu_00142 | 96539  | 73182  | 23358  | 5.84  | 99.21 |
| chr1 | 13707187 | 13717837 | 10651  | 0.05 | C_unshiu_00142 | 59111  | 48472  | 10640  | 2.66  | 98.8  |
| chr1 | 13717937 | 13723950 | 6014   | 0.03 | C_unshiu_00142 | 47515  | 41495  | 6021   | 1.51  | 99.37 |
| chr1 | 13723860 | 13737461 | 13602  | 0.06 | C_unshiu_00142 | 41494  | 27863  | 13632  | 3.41  | 98.42 |
| chr1 | 13737907 | 13738984 | 1078   | 0    | C_unshiu_00142 | 26995  | 25913  | 1083   | 0.27  | 98.62 |
| chr1 | 13742044 | 13760811 | 18768  | 0.08 | C_unshiu_00142 | 24284  | 5524   | 18761  | 4.69  | 98.59 |
| chr1 | 13762780 | 13807195 | 44416  | 0.2  | C_unshiu_00576 | 16093  | 60419  | 44327  | 25.73 | 98.59 |
| chr1 | 13815563 | 13819111 | 3549   | 0.02 | C_unshiu_00879 | 14596  | 18144  | 3549   | 2.97  | 100   |
| chr1 | 13819106 | 13823686 | 4581   | 0.02 | C_unshiu_00576 | 72053  | 76655  | 4603   | 2.67  | 99.07 |
| chr1 | 13824878 | 13829494 | 4617   | 0.02 | C_unshiu_00103 | 212782 | 208169 | 4614   | 1.02  | 98.85 |
| chr1 | 13859281 | 13868102 | 8822   | 0.04 | C_unshiu_00103 | 178299 | 169447 | 8853   | 1.96  | 99.27 |
| chr1 | 13869550 | 13871181 | 1632   | 0.01 | C_unshiu_00103 | 167574 | 165936 | 1639   | 0.36  | 98.6  |
| chr1 | 13875393 | 13882523 | 7131   | 0.03 | C_unshiu_00103 | 164528 | 157398 | 7131   | 1.58  | 99.44 |
| chr1 | 13882509 | 13883863 | 1355   | 0.01 | C_unshiu_00103 | 157070 | 155710 | 1361   | 0.3   | 98.68 |
| chr1 | 13885096 | 13893707 | 8612   | 0.04 | C_unshiu_00103 | 154612 | 146001 | 8612   | 1.91  | 100   |
| chr1 | 13899457 | 13941985 | 42529  | 0.19 | C_unshiu_00103 | 139768 | 97212  | 42557  | 9.43  | 98.87 |
| chr1 | 13942272 | 13943876 | 1605   | 0.01 | C_unshiu_00103 | 96665  | 95063  | 1603   | 0.36  | 98.94 |
| chr1 | 13955286 | 13963438 | 8153   | 0.04 | C_unshiu_00632 | 145714 | 153846 | 8133   | 5.07  | 98.88 |
| chr1 | 13964242 | 13970210 | 5969   | 0.03 | C_unshiu_00632 | 154455 | 160416 | 5962   | 3.72  | 99.72 |
| chr1 | 13973675 | 13975133 | 1459   | 0.01 | C_unshiu_01231 | 696    | 2151   | 1456   | 1.77  | 98.63 |
| chr1 | 13977082 | 13978383 | 1302   | 0.01 | C_unshiu_00681 | 109134 | 110435 | 1302   | 0.88  | 98.77 |
| chr1 | 13987007 | 13989448 | 2442   | 0.01 | C_unshiu_01031 | 79875  | 77434  | 2442   | 2.37  | 100   |
| chr1 | 13999414 | 14005517 | 6104   | 0.03 | C_unshiu_00030 | 424940 | 418865 | 6076   | 0.86  | 99.21 |
| chr1 | 14006596 | 14013966 | 7371   | 0.03 | C_unshiu_00030 | 416695 | 409322 | 7374   | 1.04  | 99.74 |
| chr1 | 14016211 | 14041445 | 25235  | 0.11 | C_unshiu_00030 | 397898 | 372644 | 25255  | 3.56  | 98.49 |
| chr1 | 14041768 | 14043648 | 1881   | 0.01 | C_unshiu_00030 | 372315 | 370433 | 1883   | 0.27  | 99.04 |
| chr1 | 14043546 | 14049813 | 6268   | 0.03 | C_unshiu_00030 | 370434 | 364182 | 6253   | 0.88  | 98.76 |
| chr1 | 14060041 | 14070357 | 10317  | 0.05 | C_unshiu_00030 | 354322 | 343990 | 10333  | 1.46  | 98.76 |
| chr1 | 14103951 | 14140292 | 36342  | 0.16 | C_unshiu_00030 | 314723 | 278394 | 36330  | 5.12  | 99.35 |
| chr1 | 14143734 | 14148103 | 4370   | 0.02 | C_unshiu_00906 | 32221  | 36591  | 4371   | 3.76  | 99.52 |
| chr1 | 14158385 | 14162166 | 3782   | 0.02 | C_unshiu_00906 | 48535  | 52323  | 3789   | 3.26  | 98.02 |
| chr1 | 14164703 | 14166122 | 1420   | 0.01 | C_unshiu_00906 | 60253  | 61673  | 1421   | 1.22  | 99.72 |
| chr1 | 14169867 | 14194781 | 24915  | 0.11 | C_unshiu_00533 | 18910  | 43818  | 24909  | 13.64 | 99.96 |
| chr1 | 14200321 | 14202492 | 2172   | 0.01 | C_unshiu_00533 | 53828  | 56000  | 2173   | 1.19  | 99.59 |
| chr1 | 14204188 | 14207771 | 3584   | 0.02 | C_unshiu_00321 | 151616 | 155199 | 3584   | 1.4   | 100   |
| chr1 | 14207766 | 14211205 | 3440   | 0.02 | C_unshiu_00533 | 60576  | 64017  | 3442   | 1.88  | 99.94 |
| chr1 | 14217691 | 14240633 | 22943  | 0.1  | C_unshiu_00533 | 73559  | 96495  | 22937  | 12.56 | 99.97 |
| chr1 | 14253758 | 14256456 | 2699   | 0.01 | C_unshiu_01875 | 2699   | 1      | 2699   | 5.92  | 100   |
| chr1 | 14253806 | 14280319 | 26514  | 0.12 | C_unshiu_01875 | 2695   | 29077  | 26383  | 57.86 | 99.03 |
| chr1 | 14285097 | 14289055 | 3959   | 0.02 | C_unshiu_01875 | 35983  | 39944  | 3962   | 8.69  | 99.34 |
| chr1 | 14294320 | 14296023 | 1704   | 0.01 | C_unshiu_01875 | 39942  | 41653  | 1712   | 3.75  | 98.37 |
| chr1 | 14302785 | 14307048 | 4264   | 0.02 | C_unshiu_02028 | 39205  | 34941  | 4265   | 10.78 | 99.23 |
| chr1 | 14307055 | 14338212 | 31158  | 0.14 | C_unshiu_02028 | 34764  | 3617   | 31148  | 78.69 | 99.64 |
| chr1 | 14370188 | 14377118 | 6931   | 0.03 | C_unshiu_00030 | 62887  | 69839  | 6953   | 0.98  | 98.75 |
| chr1 | 14377285 | 14379586 | 2302   | 0.01 | C_unshiu_00030 | 70004  | 72304  | 2301   | 0.32  | 99.52 |
| chr1 | 14380288 | 14381642 | 1355   | 0.01 | C_unshiu_00030 | 74663  | 76027  | 1365   | 0.19  | 98.02 |
| chr1 | 14386030 | 14388361 | 2332   | 0.01 | C_unshiu_00030 | 94524  | 96864  | 2341   | 0.33  | 98.55 |
| chr1 | 14388166 | 14410449 | 22284  | 0.1  | C_unshiu_00030 | 96864  | 119186 | 22323  | 3.15  | 99.17 |
| chr1 | 14413272 | 14428302 | 15031  | 0.07 | C_unshiu_01762 | 15303  | 30333  | 15031  | 30.11 | 99.95 |
| chr1 | 14455914 | 14462812 | 6899   | 0.03 | C_unshiu_00030 | 134062 | 140993 | 6932   | 0.98  | 98.96 |
| chr1 | 14462903 | 14468740 | 5838   | 0.03 | C_unshiu_00030 | 141103 | 146938 | 5836   | 0.82  | 98.96 |
| chr1 | 14473071 | 14475314 | 2244   | 0.01 | C_unshiu_00907 | 99710  | 97467  | 2244   | 1.93  | 100   |
| chr1 | 14475570 | 14481245 | 5676   | 0.03 | C_unshiu_00030 | 147371 | 153044 | 5674   | 0.8   | 99.84 |
| chr1 | 14501417 | 14505234 | 3818   | 0.02 | C_unshiu_00907 | 76318  | 72501  | 3818   | 3.28  | 99.71 |
| chr1 | 14510433 | 14530322 | 19890  | 0.09 | C_unshiu_00907 | 67621  | 47739  | 19883  | 17.09 | 99.86 |
| chr1 | 14532726 | 14539218 | 6493   | 0.03 | C_unshiu_00907 | 45838  | 39346  | 6493   | 5.58  | 99.98 |
| chr1 | 14541136 | 14543242 | 2107   | 0.01 | C_unshiu_00030 | 170529 | 172635 | 2107   | 0.3   | 99.48 |
| chr1 | 14559749 | 14566114 | 6366   | 0.03 | C_unshiu_00907 | 20888  | 14521  | 6368   | 5.47  | 99.92 |
| chr1 | 14573021 | 14753895 | 180875 | 0.8  | C_unshiu_00170 | 6364   | 187231 | 180868 | 49.22 | 99.98 |
| chr1 | 14754633 | 14812914 | 58282  | 0.26 | C_unshiu_00170 | 188491 | 246772 | 58282  | 15.86 | 100   |
| chr1 | 14812937 | 14816050 | 3114   | 0.01 | C_unshiu_00170 | 246905 | 250018 | 3114   | 0.85  | 100   |
| chr1 | 14818686 | 14820273 | 1588   | 0.01 | C_unshiu_00814 | 62939  | 64530  | 1592   | 1.25  | 98.37 |
| chr1 | 14821632 | 14823321 | 1690   | 0.01 | C_unshiu_02360 | 1988   | 3686   | 1699   | 6.05  | 98.53 |
| chr1 | 14841378 | 14850974 | 9597   | 0.04 | C_unshiu_02360 | 18501  | 28090  | 9590   | 34.14 | 99.67 |
| chr1 | 14864995 | 14868165 | 3171   | 0.01 | C_unshiu_00814 | 106000 | 109168 | 3169   | 2.49  | 98.74 |
| chr1 | 14872824 | 14876927 | 4104   | 0.02 | C_unshiu_00814 | 112516 | 116620 | 4105   | 3.23  | 98.06 |
| chr1 | 14878062 | 14882874 | 4813   | 0.02 | C_unshiu_00814 | 116953 | 121792 | 4840   | 3.81  | 98.88 |
| chr1 | 14883457 | 14910998 | 27542  | 0.12 | C_unshiu_01403 | 53004  | 25490  | 27515  | 39.15 | 99.88 |
| chr1 | 14913260 | 14915367 | 2108   | 0.01 | C_unshiu_01403 | 24627  | 22520  | 2108   | 3     | 100   |
| chr1 | 14917665 | 14938800 | 21136  | 0.09 | C_unshiu_01403 | 21586  | 540    | 21047  | 29.95 | 99.43 |
| chr1 | 14956323 | 14964238 | 7916   | 0.04 | C_unshiu_01090 | 90746  | 82825  | 7922   | 8.15  | 98.89 |
| chr1 | 14968155 | 14971651 | 3497   | 0.02 | C_unshiu_01090 | 79850  | 76353  | 3498   | 3.6   | 99.57 |
| chr1 | 14971675 | 14974113 | 2439   | 0.01 | C_unshiu_01090 | 75286  | 72848  | 2439   | 2.51  | 99.67 |
| chr1 | 14974253 | 14996264 | 22012  | 0.1  | C_unshiu_01090 | 72353  | 50324  | 22030  | 22.66 | 99.46 |
| chr1 | 14996287 | 15013563 | 17277  | 0.08 | C_unshiu_01090 | 50072  | 32785  | 17288  | 17.78 | 99.62 |

|      |          |          |       |      |                |        |        |       |       |       |
|------|----------|----------|-------|------|----------------|--------|--------|-------|-------|-------|
| chr1 | 15017305 | 15020392 | 3088  | 0.01 | C_unshiu_02039 | 266    | 3344   | 3079  | 7.87  | 99.32 |
| chr1 | 15021888 | 15051013 | 29126 | 0.13 | C_unshiu_01090 | 31091  | 2081   | 29011 | 29.84 | 99.39 |
| chr1 | 15056568 | 15059876 | 3309  | 0.01 | C_unshiu_00032 | 521983 | 518675 | 3309  | 0.47  | 100   |
| chr1 | 15079380 | 15080391 | 1012  | 0    | C_unshiu_02039 | 4222   | 5234   | 1013  | 2.59  | 98.82 |
| chr1 | 15086295 | 15090438 | 4144  | 0.02 | C_unshiu_02039 | 11667  | 15810  | 4144  | 10.59 | 99.98 |
| chr1 | 15100534 | 15105692 | 5159  | 0.02 | C_unshiu_00626 | 84428  | 89614  | 5187  | 3.21  | 98.38 |
| chr1 | 15106991 | 15110874 | 3884  | 0.02 | C_unshiu_00626 | 90425  | 94310  | 3886  | 2.4   | 99.79 |
| chr1 | 15112728 | 15116560 | 3833  | 0.02 | C_unshiu_02039 | 32102  | 35913  | 3812  | 9.74  | 98.78 |
| chr1 | 15118399 | 15122759 | 4361  | 0.02 | C_unshiu_00626 | 97143  | 101501 | 4359  | 2.69  | 98.58 |
| chr1 | 15124160 | 15129576 | 5417  | 0.02 | C_unshiu_00626 | 101525 | 106951 | 5427  | 3.35  | 99.63 |
| chr1 | 15129814 | 15131201 | 1388  | 0.01 | C_unshiu_00656 | 73224  | 71837  | 1388  | 0.9   | 100   |
| chr1 | 15131202 | 15134291 | 3090  | 0.01 | C_unshiu_00626 | 107933 | 111022 | 3090  | 1.91  | 99.84 |
| chr1 | 15134673 | 15139346 | 4674  | 0.02 | C_unshiu_00188 | 174295 | 178966 | 4672  | 1.35  | 99.96 |
| chr1 | 15139334 | 15155983 | 16650 | 0.07 | C_unshiu_00103 | 212707 | 229394 | 16688 | 3.7   | 98.38 |
| chr1 | 15155869 | 15163819 | 7951  | 0.04 | C_unshiu_00103 | 229344 | 237287 | 7944  | 1.76  | 99.21 |
| chr1 | 15164045 | 15195793 | 31749 | 0.14 | C_unshiu_00103 | 237311 | 269119 | 31809 | 7.05  | 99.04 |
| chr1 | 15196693 | 15206117 | 9425  | 0.04 | C_unshiu_00103 | 269110 | 278540 | 9431  | 2.09  | 99.59 |
| chr1 | 15205893 | 15224213 | 18321 | 0.08 | C_unshiu_00103 | 278423 | 296780 | 18358 | 4.07  | 99.38 |
| chr1 | 15224257 | 15239770 | 15514 | 0.07 | C_unshiu_00103 | 297321 | 312881 | 15561 | 3.45  | 99.19 |
| chr1 | 15239936 | 15247459 | 7524  | 0.03 | C_unshiu_00103 | 312994 | 320579 | 7586  | 1.68  | 98.58 |
| chr1 | 15247487 | 15266618 | 19132 | 0.09 | C_unshiu_00103 | 321226 | 340407 | 19182 | 4.25  | 98.83 |
| chr1 | 15270225 | 15314041 | 43817 | 0.19 | C_unshiu_00103 | 344143 | 387890 | 43748 | 9.69  | 99.26 |
| chr1 | 15314038 | 15329191 | 15154 | 0.07 | C_unshiu_00103 | 387926 | 403122 | 15197 | 3.37  | 98.48 |
| chr1 | 15328953 | 15339469 | 10517 | 0.05 | C_unshiu_00103 | 403403 | 413874 | 10472 | 2.32  | 98.34 |
| chr1 | 15339665 | 15352828 | 13164 | 0.06 | C_unshiu_00103 | 414191 | 427367 | 13177 | 2.92  | 99.77 |
| chr1 | 15352824 | 15354843 | 2020  | 0.01 | C_unshiu_00103 | 427806 | 429827 | 2022  | 0.45  | 99.55 |
| chr1 | 15371972 | 15373863 | 1892  | 0.01 | C_unshiu_00103 | 451289 | 449378 | 1912  | 0.42  | 98.74 |
| chr1 | 15381847 | 15398583 | 16737 | 0.07 | C_unshiu_01429 | 66029  | 49277  | 16753 | 24.53 | 99.4  |
| chr1 | 15399501 | 15401304 | 1804  | 0.01 | C_unshiu_01429 | 47462  | 45646  | 1817  | 2.66  | 98.3  |
| chr1 | 15401594 | 15432353 | 30760 | 0.14 | C_unshiu_01429 | 44831  | 14017  | 30815 | 45.12 | 98.76 |
| chr1 | 15432770 | 15436329 | 3560  | 0.02 | C_unshiu_01429 | 13050  | 9491   | 3560  | 5.21  | 100   |
| chr1 | 15441963 | 15452968 | 11006 | 0.05 | C_unshiu_00114 | 6901   | 17919  | 11019 | 2.54  | 99.09 |
| chr1 | 15454176 | 15455692 | 1517  | 0.01 | C_unshiu_00114 | 17915  | 19437  | 1523  | 0.35  | 98.82 |
| chr1 | 15458589 | 15460535 | 1947  | 0.01 | C_unshiu_00114 | 20230  | 22179  | 1950  | 0.45  | 98.67 |
| chr1 | 15474016 | 15498867 | 24852 | 0.11 | C_unshiu_00826 | 25060  | 374    | 24687 | 19.67 | 98.87 |
| chr1 | 15497183 | 15500337 | 3155  | 0.01 | C_unshiu_00114 | 55245  | 58392  | 3148  | 0.73  | 98.39 |
| chr1 | 15524967 | 15563226 | 38260 | 0.17 | C_unshiu_00225 | 274332 | 235988 | 38345 | 12.27 | 98.82 |
| chr1 | 15564071 | 15587224 | 23154 | 0.1  | C_unshiu_00225 | 234793 | 211656 | 23138 | 7.4   | 98.67 |
| chr1 | 15610915 | 15617582 | 6668  | 0.03 | C_unshiu_00225 | 189406 | 182724 | 6683  | 2.14  | 99.15 |
| chr1 | 15618888 | 15641694 | 22807 | 0.1  | C_unshiu_00225 | 181741 | 158937 | 22805 | 7.3   | 99.55 |
| chr1 | 15663419 | 15665250 | 1832  | 0.01 | C_unshiu_02930 | 9421   | 11250  | 1830  | 12.23 | 99.24 |
| chr1 | 15666869 | 15668555 | 1687  | 0.01 | C_unshiu_02719 | 4811   | 6500   | 1690  | 8.7   | 99.41 |
| chr1 | 15731471 | 15733142 | 1672  | 0.01 | C_unshiu_01518 | 41635  | 43308  | 1674  | 2.69  | 99.22 |
| chr1 | 15735015 | 15747019 | 12005 | 0.05 | C_unshiu_01518 | 45469  | 57474  | 12006 | 19.27 | 99.48 |
| chr1 | 15747457 | 15751033 | 3577  | 0.02 | C_unshiu_01518 | 57467  | 61054  | 3588  | 5.76  | 98.08 |
| chr1 | 15751072 | 15759957 | 8886  | 0.04 | C_unshiu_01992 | 8901   | 1      | 8901  | 21.78 | 98.88 |
| chr1 | 15778637 | 15784500 | 5864  | 0.03 | C_unshiu_01992 | 35005  | 40868  | 5864  | 14.35 | 99.66 |
| chr1 | 15786666 | 15788815 | 2150  | 0.01 | C_unshiu_01375 | 60500  | 58351  | 2150  | 2.97  | 99.95 |
| chr1 | 15789167 | 15790683 | 1517  | 0.01 | C_unshiu_01375 | 57768  | 56252  | 1517  | 2.1   | 100   |
| chr1 | 15793417 | 15795722 | 2306  | 0.01 | C_unshiu_01375 | 44373  | 42058  | 2316  | 3.2   | 98.79 |
| chr1 | 15796742 | 15801401 | 4660  | 0.02 | C_unshiu_01375 | 40237  | 35575  | 4663  | 6.45  | 99.7  |
| chr1 | 15807189 | 15808522 | 1334  | 0.01 | C_unshiu_02058 | 13748  | 15082  | 1335  | 3.48  | 99.18 |
| chr1 | 15811911 | 15816942 | 5032  | 0.02 | C_unshiu_02058 | 16240  | 21273  | 5034  | 13.12 | 98.99 |
| chr1 | 15824325 | 15826964 | 2640  | 0.01 | C_unshiu_02058 | 28367  | 31006  | 2640  | 6.88  | 99.96 |
| chr1 | 15827085 | 15835014 | 7930  | 0.04 | C_unshiu_00554 | 7282   | 15212  | 7931  | 4.48  | 99.92 |
| chr1 | 15838431 | 15839821 | 1391  | 0.01 | C_unshiu_01429 | 3308   | 1928   | 1381  | 2.02  | 98.85 |
| chr1 | 15840254 | 15851119 | 10866 | 0.05 | C_unshiu_00554 | 17825  | 28717  | 10893 | 6.15  | 99.06 |
| chr1 | 15851599 | 15871777 | 20179 | 0.09 | C_unshiu_00554 | 30441  | 50660  | 20220 | 11.42 | 99.36 |
| chr1 | 15875211 | 15876469 | 1259  | 0.01 | C_unshiu_00554 | 52842  | 54100  | 1259  | 0.71  | 99.13 |
| chr1 | 15876542 | 15878517 | 1976  | 0.01 | C_unshiu_00554 | 54201  | 56182  | 1982  | 1.12  | 99.39 |
| chr1 | 15878818 | 15880006 | 1189  | 0.01 | C_unshiu_00554 | 56674  | 57867  | 1194  | 0.67  | 98.32 |
| chr1 | 15881984 | 15901523 | 19540 | 0.09 | C_unshiu_00554 | 58943  | 78533  | 19591 | 11.07 | 98.66 |
| chr1 | 15913658 | 15948579 | 34922 | 0.16 | C_unshiu_00554 | 91271  | 126233 | 34963 | 19.75 | 98.92 |
| chr1 | 15949160 | 15959427 | 10268 | 0.05 | C_unshiu_00554 | 126755 | 137024 | 10270 | 5.8   | 99.57 |
| chr1 | 15960085 | 15963747 | 3663  | 0.02 | C_unshiu_00554 | 137850 | 141513 | 3664  | 2.07  | 99.59 |
| chr1 | 15963743 | 15970400 | 6658  | 0.03 | C_unshiu_00554 | 142193 | 148857 | 6665  | 3.76  | 99.59 |
| chr1 | 15978751 | 15986446 | 7696  | 0.03 | C_unshiu_00554 | 157022 | 164750 | 7729  | 4.37  | 98.48 |
| chr1 | 15988022 | 15990933 | 2912  | 0.01 | C_unshiu_00681 | 139144 | 136234 | 2911  | 1.96  | 99.97 |
| chr1 | 15992601 | 15994700 | 2100  | 0.01 | C_unshiu_00554 | 164526 | 166625 | 2100  | 1.19  | 99.67 |
| chr1 | 15996139 | 16000221 | 4083  | 0.02 | C_unshiu_00681 | 130964 | 126865 | 4100  | 2.76  | 98    |
| chr1 | 16002215 | 16018321 | 16107 | 0.07 | C_unshiu_00681 | 126267 | 110138 | 16130 | 10.86 | 99.49 |
| chr1 | 16019248 | 16024770 | 5523  | 0.02 | C_unshiu_00681 | 108974 | 103448 | 5527  | 3.72  | 99.62 |
| chr1 | 16026132 | 16029646 | 3515  | 0.02 | C_unshiu_00681 | 103385 | 99879  | 3507  | 2.36  | 99.46 |
| chr1 | 16029647 | 16036008 | 6362  | 0.03 | C_unshiu_00681 | 99386  | 93008  | 6379  | 4.29  | 99.29 |
| chr1 | 16036291 | 16063809 | 27519 | 0.12 | C_unshiu_00681 | 92911  | 65402  | 27510 | 18.52 | 99.24 |
| chr1 | 16064120 | 16097464 | 33345 | 0.15 | C_unshiu_00681 | 65416  | 32041  | 33376 | 22.47 | 98.75 |
| chr1 | 16104233 | 16105775 | 1543  | 0.01 | C_unshiu_01440 | 60586  | 62128  | 1543  | 2.29  | 99.94 |
| chr1 | 16123722 | 16126194 | 2473  | 0.01 | C_unshiu_00681 | 29110  | 26636  | 2475  | 1.67  | 99.68 |
| chr1 | 16127347 | 16131826 | 4480  | 0.02 | C_unshiu_00681 | 26530  | 22046  | 4485  | 3.02  | 99.64 |

|      |          |          |        |      |                |        |        |        |       |       |
|------|----------|----------|--------|------|----------------|--------|--------|--------|-------|-------|
| chr1 | 16151980 | 16185050 | 33071  | 0.15 | C_unshiu_00338 | 232264 | 199185 | 33080  | 13.24 | 99.05 |
| chr1 | 16189761 | 16193757 | 3997   | 0.02 | C_unshiu_00338 | 194097 | 190098 | 4000   | 1.6   | 99.3  |
| chr1 | 16193753 | 16195030 | 1278   | 0.01 | C_unshiu_00338 | 189862 | 188585 | 1278   | 0.51  | 99.61 |
| chr1 | 16194957 | 16306708 | 111752 | 0.5  | C_unshiu_00338 | 188585 | 76496  | 112090 | 44.87 | 99.11 |
| chr1 | 16306703 | 16325813 | 19111  | 0.08 | C_unshiu_00338 | 76582  | 57473  | 19110  | 7.65  | 99.4  |
| chr1 | 16327139 | 16347628 | 20490  | 0.09 | C_unshiu_00338 | 56009  | 35436  | 20574  | 8.24  | 98.89 |
| chr1 | 16348951 | 16356804 | 7854   | 0.03 | C_unshiu_00338 | 33735  | 25866  | 7870   | 3.15  | 99.23 |
| chr1 | 16359949 | 16361658 | 1710   | 0.01 | C_unshiu_00338 | 23786  | 22074  | 1713   | 0.69  | 99.65 |
| chr1 | 16370642 | 16384954 | 14313  | 0.06 | C_unshiu_00338 | 20462  | 6142   | 14321  | 5.73  | 99.85 |
| chr1 | 16391838 | 16407045 | 15208  | 0.07 | C_unshiu_00175 | 309073 | 324290 | 15218  | 4.2   | 99.09 |
| chr1 | 16407043 | 16431806 | 24764  | 0.11 | C_unshiu_00175 | 324447 | 349260 | 24814  | 6.85  | 98.85 |
| chr1 | 16438776 | 16450238 | 11463  | 0.05 | C_unshiu_00175 | 350966 | 362458 | 11493  | 3.17  | 99.44 |
| chr1 | 16449968 | 16458535 | 8568   | 0.04 | C_unshiu_00163 | 18419  | 9863   | 8557   | 2.31  | 99.47 |
| chr1 | 16462571 | 16465852 | 3282   | 0.01 | C_unshiu_00163 | 5983   | 2701   | 3283   | 0.89  | 99.97 |
| chr1 | 16472741 | 16476579 | 3839   | 0.02 | C_unshiu_01579 | 55885  | 52046  | 3840   | 6.54  | 99.64 |
| chr1 | 16476554 | 16487286 | 10733  | 0.05 | C_unshiu_01579 | 51941  | 41221  | 10721  | 18.27 | 99.31 |
| chr1 | 16489415 | 16511662 | 22248  | 0.1  | C_unshiu_01579 | 40308  | 18079  | 22230  | 37.87 | 99.17 |
| chr1 | 16519648 | 16521298 | 1651   | 0.01 | C_unshiu_00080 | 492813 | 491157 | 1657   | 0.34  | 98.62 |
| chr1 | 16526172 | 16533011 | 6840   | 0.03 | C_unshiu_00080 | 488492 | 481623 | 6870   | 1.39  | 98.49 |
| chr1 | 16532115 | 16539909 | 7795   | 0.03 | C_unshiu_00080 | 481982 | 474207 | 7776   | 1.58  | 99.19 |
| chr1 | 16539933 | 16563087 | 23155  | 0.1  | C_unshiu_00080 | 473802 | 450600 | 23203  | 4.71  | 98.97 |
| chr1 | 16563130 | 16588696 | 25567  | 0.11 | C_unshiu_00080 | 450400 | 424793 | 25608  | 5.2   | 98.94 |
| chr1 | 16588611 | 16597840 | 9230   | 0.04 | C_unshiu_00080 | 424836 | 415639 | 9198   | 1.87  | 98.36 |
| chr1 | 16602324 | 16612913 | 10590  | 0.05 | C_unshiu_00080 | 410377 | 399773 | 10605  | 2.15  | 99.13 |
| chr1 | 16612504 | 16615111 | 2608   | 0.01 | C_unshiu_00080 | 395348 | 392734 | 2615   | 0.53  | 99.58 |
| chr1 | 16616040 | 16628292 | 12253  | 0.05 | C_unshiu_00080 | 392192 | 379967 | 12226  | 2.48  | 99.37 |
| chr1 | 16628070 | 16631617 | 3548   | 0.02 | C_unshiu_00080 | 379907 | 376321 | 3587   | 0.73  | 98.05 |
| chr1 | 16629995 | 16650266 | 20272  | 0.09 | C_unshiu_02542 | 2863   | 23173  | 20311  | 86.36 | 98.68 |
| chr1 | 16647987 | 16655057 | 7071   | 0.03 | C_unshiu_01511 | 39393  | 46490  | 7098   | 11.35 | 99    |
| chr1 | 16655091 | 16656302 | 1212   | 0.01 | C_unshiu_00895 | 99418  | 100629 | 1212   | 1.03  | 100   |
| chr1 | 16656303 | 16657704 | 1402   | 0.01 | C_unshiu_01511 | 48245  | 49646  | 1402   | 2.24  | 100   |
| chr1 | 16658843 | 16661474 | 2632   | 0.01 | C_unshiu_01511 | 51254  | 53885  | 2632   | 4.21  | 99.62 |
| chr1 | 16666049 | 16670600 | 4552   | 0.02 | C_unshiu_01511 | 58021  | 62562  | 4542   | 7.26  | 99.39 |
| chr1 | 16679685 | 16683641 | 3957   | 0.02 | C_unshiu_00080 | 325938 | 321982 | 3957   | 0.8   | 100   |
| chr1 | 16683679 | 16688917 | 5239   | 0.02 | C_unshiu_00080 | 321485 | 316247 | 5239   | 1.06  | 99.73 |
| chr1 | 16688917 | 16692346 | 3430   | 0.02 | C_unshiu_00080 | 315885 | 312456 | 3430   | 0.7   | 99.74 |
| chr1 | 16696522 | 16702903 | 6382   | 0.03 | C_unshiu_01511 | 1      | 6387   | 6387   | 10.21 | 99.75 |
| chr1 | 16704599 | 16713889 | 9291   | 0.04 | C_unshiu_01511 | 8380   | 17593  | 9214   | 14.73 | 98.35 |
| chr1 | 16714595 | 16717900 | 3306   | 0.01 | C_unshiu_01511 | 18707  | 22010  | 3304   | 5.28  | 99.76 |
| chr1 | 16723494 | 16725788 | 2295   | 0.01 | C_unshiu_00015 | 26234  | 28530  | 2297   | 0.26  | 99.52 |
| chr1 | 16727448 | 16736881 | 9434   | 0.04 | C_unshiu_00015 | 30290  | 39723  | 9434   | 1.07  | 99.7  |
| chr1 | 16738618 | 16741215 | 2598   | 0.01 | C_unshiu_00015 | 18069  | 20666  | 2598   | 0.3   | 100   |
| chr1 | 16741215 | 16754049 | 12835  | 0.06 | C_unshiu_00015 | 43715  | 56549  | 12835  | 1.46  | 100   |
| chr1 | 16758306 | 16788678 | 30373  | 0.14 | C_unshiu_00015 | 60337  | 90723  | 30387  | 3.46  | 99.86 |
| chr1 | 16768718 | 16795026 | 26309  | 0.12 | C_unshiu_00015 | 70742  | 97071  | 26330  | 3     | 99.92 |
| chr1 | 16797495 | 16814038 | 16544  | 0.07 | C_unshiu_00015 | 100135 | 116680 | 16546  | 1.88  | 99.16 |
| chr1 | 16814169 | 16816272 | 2104   | 0.01 | C_unshiu_00015 | 116969 | 119060 | 2092   | 0.24  | 99.24 |
| chr1 | 16817595 | 16853597 | 36003  | 0.16 | C_unshiu_00015 | 120940 | 156944 | 36005  | 4.1   | 99.99 |
| chr1 | 16855578 | 16890493 | 34916  | 0.16 | C_unshiu_00015 | 158389 | 193283 | 34895  | 3.97  | 99.86 |
| chr1 | 16890542 | 16905944 | 15403  | 0.07 | C_unshiu_00015 | 193597 | 208996 | 15400  | 1.75  | 99.98 |
| chr1 | 16907605 | 16920259 | 12655  | 0.06 | C_unshiu_00015 | 211214 | 223883 | 12670  | 1.44  | 99.85 |
| chr1 | 16920700 | 16924553 | 3854   | 0.02 | C_unshiu_00015 | 224653 | 228515 | 3863   | 0.44  | 98.03 |
| chr1 | 16981908 | 16990140 | 8233   | 0.04 | C_unshiu_00901 | 80961  | 72731  | 8231   | 7.04  | 99.45 |
| chr1 | 16986695 | 17020758 | 34064  | 0.15 | C_unshiu_00901 | 80971  | 115035 | 34065  | 29.12 | 99.97 |
| chr1 | 17035676 | 17037314 | 1639   | 0.01 | C_unshiu_01999 | 8718   | 10355  | 1638   | 4.04  | 99.33 |
| chr1 | 17038719 | 17040251 | 1533   | 0.01 | C_unshiu_01999 | 11094  | 12619  | 1526   | 3.76  | 99.02 |
| chr1 | 17041244 | 17057395 | 16152  | 0.07 | C_unshiu_01999 | 14005  | 30195  | 16191  | 39.89 | 98.62 |
| chr1 | 17055437 | 17064083 | 8647   | 0.04 | C_unshiu_00897 | 81942  | 73290  | 8653   | 7.37  | 98.96 |
| chr1 | 17064171 | 17069897 | 5727   | 0.03 | C_unshiu_00897 | 73289  | 67558  | 5732   | 4.88  | 98.35 |
| chr1 | 17087209 | 17115805 | 28597  | 0.13 | C_unshiu_00897 | 51910  | 23340  | 28571  | 24.33 | 98.69 |
| chr1 | 17117239 | 17128285 | 11047  | 0.05 | C_unshiu_00897 | 21432  | 10414  | 11019  | 9.39  | 98.72 |
| chr1 | 17163346 | 17170802 | 7457   | 0.03 | C_unshiu_01402 | 49833  | 42380  | 7454   | 10.6  | 98.7  |
| chr1 | 17193857 | 17200037 | 6181   | 0.03 | C_unshiu_01402 | 18990  | 12792  | 6199   | 8.82  | 99.16 |
| chr1 | 17214452 | 17216012 | 1561   | 0.01 | C_unshiu_00151 | 310682 | 312242 | 1561   | 0.4   | 100   |
| chr1 | 17216013 | 17220501 | 4489   | 0.02 | C_unshiu_00151 | 312428 | 316939 | 4512   | 1.17  | 98.87 |
| chr1 | 17223744 | 17232313 | 8570   | 0.04 | C_unshiu_00151 | 319036 | 327598 | 8563   | 2.22  | 98.78 |
| chr1 | 17233596 | 17240522 | 6927   | 0.03 | C_unshiu_00151 | 329309 | 336240 | 6932   | 1.8   | 99.74 |
| chr1 | 17265385 | 17271839 | 6455   | 0.03 | C_unshiu_00934 | 20635  | 27074  | 6440   | 5.69  | 98.35 |
| chr1 | 17276362 | 17278752 | 2391   | 0.01 | C_unshiu_00934 | 31227  | 33620  | 2394   | 2.12  | 98.92 |
| chr1 | 17281420 | 17283803 | 2384   | 0.01 | C_unshiu_00934 | 34815  | 37202  | 2388   | 2.11  | 99.2  |
| chr1 | 17284148 | 17285557 | 1410   | 0.01 | C_unshiu_00934 | 38071  | 39480  | 1410   | 1.25  | 98.44 |
| chr1 | 17289899 | 17291945 | 2047   | 0.01 | C_unshiu_00220 | 219811 | 217767 | 2045   | 0.65  | 98.34 |
| chr1 | 17291967 | 17293074 | 1108   | 0    | C_unshiu_00220 | 217142 | 216045 | 1098   | 0.35  | 98.92 |
| chr1 | 17292677 | 17294484 | 1808   | 0.01 | C_unshiu_00220 | 216240 | 214439 | 1802   | 0.57  | 98.23 |
| chr1 | 17306005 | 17314235 | 8231   | 0.04 | C_unshiu_00934 | 63429  | 71659  | 8231   | 7.27  | 100   |
| chr1 | 17318439 | 17329447 | 11009  | 0.05 | C_unshiu_00934 | 75694  | 86703  | 11010  | 9.73  | 99.61 |
| chr1 | 17335304 | 17337743 | 2440   | 0.01 | C_unshiu_00934 | 93710  | 96149  | 2440   | 2.16  | 99.43 |
| chr1 | 17341754 | 17344184 | 2431   | 0.01 | C_unshiu_01542 | 7025   | 9455   | 2431   | 3.99  | 99.96 |
| chr1 | 17347197 | 17350856 | 3660   | 0.02 | C_unshiu_01542 | 11018  | 14676  | 3659   | 6.01  | 99.95 |

|      |          |          |       |      |                |        |        |       |       |       |
|------|----------|----------|-------|------|----------------|--------|--------|-------|-------|-------|
| chr1 | 17352976 | 17358982 | 6007  | 0.03 | C_unshiu_01542 | 15375  | 21399  | 6025  | 9.89  | 98.81 |
| chr1 | 17366008 | 17369970 | 3963  | 0.02 | C_unshiu_00934 | 106318 | 110282 | 3965  | 3.5   | 98.72 |
| chr1 | 17369815 | 17379514 | 9700  | 0.04 | C_unshiu_01542 | 32734  | 42503  | 9770  | 16.04 | 98.19 |
| chr1 | 17397313 | 17400182 | 2870  | 0.01 | C_unshiu_00047 | 10639  | 13513  | 2875  | 0.45  | 98.85 |
| chr1 | 17402334 | 17403539 | 1206  | 0.01 | C_unshiu_00047 | 21257  | 22462  | 1206  | 0.19  | 100   |
| chr1 | 17403925 | 17403539 | 1435  | 0.01 | C_unshiu_00630 | 113312 | 114742 | 1431  | 0.89  | 98.26 |
| chr1 | 17409409 | 17415186 | 5778  | 0.03 | C_unshiu_00047 | 27646  | 33458  | 5813  | 0.92  | 98.2  |
| chr1 | 17416353 | 17417750 | 1398  | 0.01 | C_unshiu_00047 | 35333  | 36730  | 1398  | 0.22  | 99.93 |
| chr1 | 17421575 | 17426820 | 5246  | 0.02 | C_unshiu_00047 | 39357  | 44606  | 5250  | 0.83  | 99.52 |
| chr1 | 17426646 | 17431838 | 5193  | 0.02 | C_unshiu_00047 | 44595  | 49777  | 5183  | 0.82  | 98.58 |
| chr1 | 17433094 | 17437344 | 4251  | 0.02 | C_unshiu_00047 | 52163  | 56413  | 4251  | 0.67  | 99.81 |
| chr1 | 17437336 | 17470273 | 32938 | 0.15 | C_unshiu_00047 | 57130  | 90120  | 32991 | 5.22  | 99.26 |
| chr1 | 17470476 | 17520840 | 50365 | 0.22 | C_unshiu_00047 | 90112  | 140603 | 50492 | 7.99  | 99.11 |
| chr1 | 17520841 | 17522170 | 1330  | 0.01 | C_unshiu_02698 | 16778  | 15449  | 1330  | 6.69  | 99.55 |
| chr1 | 17523250 | 17531559 | 8310  | 0.04 | C_unshiu_00047 | 141900 | 150208 | 8309  | 1.31  | 99.14 |
| chr1 | 17531584 | 17532748 | 1165  | 0.01 | C_unshiu_00047 | 151175 | 152339 | 1165  | 0.18  | 99.4  |
| chr1 | 17539626 | 17562280 | 22655 | 0.1  | C_unshiu_00047 | 159533 | 182300 | 22768 | 3.6   | 98.92 |
| chr1 | 17562878 | 17569910 | 7033  | 0.03 | C_unshiu_00047 | 182275 | 189312 | 7038  | 1.11  | 99.46 |
| chr1 | 17570715 | 17572388 | 1674  | 0.01 | C_unshiu_00047 | 190525 | 192196 | 1672  | 0.26  | 98.69 |
| chr1 | 17573775 | 17589683 | 15909 | 0.07 | C_unshiu_00047 | 192195 | 208105 | 15911 | 2.52  | 99.17 |
| chr1 | 17589725 | 17597606 | 7882  | 0.04 | C_unshiu_00047 | 208097 | 216006 | 7910  | 1.25  | 99.27 |
| chr1 | 17600390 | 17650289 | 49900 | 0.22 | C_unshiu_00047 | 217318 | 267261 | 49944 | 7.9   | 99.3  |
| chr1 | 17650281 | 17713007 | 62727 | 0.28 | C_unshiu_00047 | 267412 | 330278 | 62867 | 9.95  | 99.36 |
| chr1 | 17712999 | 17718304 | 5306  | 0.02 | C_unshiu_00047 | 330714 | 336014 | 5301  | 0.84  | 99.17 |
| chr1 | 17718307 | 17730020 | 11714 | 0.05 | C_unshiu_00047 | 336125 | 347845 | 11721 | 1.85  | 99.09 |
| chr1 | 17729497 | 17791911 | 62415 | 0.28 | C_unshiu_00047 | 347844 | 410496 | 62653 | 9.91  | 99.17 |
| chr1 | 17793675 | 17830421 | 36747 | 0.16 | C_unshiu_00047 | 413098 | 450091 | 36994 | 5.85  | 98.7  |
| chr1 | 17836099 | 17853159 | 17061 | 0.08 | C_unshiu_00047 | 450367 | 467442 | 17076 | 2.7   | 98.86 |
| chr1 | 17853368 | 17858011 | 4644  | 0.02 | C_unshiu_00047 | 467439 | 472086 | 4648  | 0.74  | 99.63 |
| chr1 | 17858018 | 17859712 | 1695  | 0.01 | C_unshiu_00047 | 472402 | 474102 | 1701  | 0.27  | 98.94 |
| chr1 | 17859935 | 17864824 | 4890  | 0.02 | C_unshiu_00047 | 474089 | 478980 | 4892  | 0.77  | 99.75 |
| chr1 | 17864824 | 17910998 | 46175 | 0.21 | C_unshiu_00047 | 480158 | 526375 | 46218 | 7.31  | 98.97 |
| chr1 | 17919277 | 17927313 | 8037  | 0.04 | C_unshiu_00047 | 534826 | 542854 | 8029  | 1.27  | 99.33 |
| chr1 | 17928147 | 17935290 | 7144  | 0.03 | C_unshiu_00047 | 543885 | 551036 | 7152  | 1.13  | 98.26 |
| chr1 | 17935683 | 17963439 | 27757 | 0.12 | C_unshiu_00047 | 551687 | 579472 | 27786 | 4.4   | 99.4  |
| chr1 | 17963441 | 17988697 | 25257 | 0.11 | C_unshiu_00047 | 579576 | 604848 | 25273 | 4     | 99.19 |
| chr1 | 17989003 | 17993678 | 4676  | 0.02 | C_unshiu_00047 | 605646 | 610343 | 4698  | 0.74  | 98.91 |
| chr1 | 17993670 | 18008806 | 15137 | 0.07 | C_unshiu_00047 | 611023 | 626222 | 15200 | 2.41  | 98.44 |
| chr1 | 18008789 | 18013001 | 4213  | 0.02 | C_unshiu_00047 | 626411 | 630600 | 4190  | 0.66  | 98.32 |
| chr1 | 18009165 | 18023861 | 14697 | 0.07 | C_unshiu_02349 | 28369  | 13702  | 14668 | 51.7  | 99.1  |
| chr1 | 18024126 | 18026089 | 1964  | 0.01 | C_unshiu_02349 | 13441  | 11477  | 1965  | 6.93  | 99.49 |
| chr1 | 18031227 | 18034232 | 3006  | 0.01 | C_unshiu_02349 | 7914   | 4895   | 3020  | 10.65 | 99.01 |
| chr1 | 18031349 | 18054902 | 23554 | 0.1  | C_unshiu_00341 | 2167   | 25693  | 23527 | 9.44  | 98.97 |
| chr1 | 18070234 | 18071473 | 1240  | 0.01 | C_unshiu_00341 | 41224  | 42465  | 1242  | 0.5   | 99.36 |
| chr1 | 18071583 | 18081776 | 10194 | 0.05 | C_unshiu_00341 | 42475  | 52724  | 10250 | 4.11  | 98.77 |
| chr1 | 18081768 | 18101327 | 19560 | 0.09 | C_unshiu_00341 | 53365  | 73018  | 19654 | 7.89  | 99.12 |
| chr1 | 18101325 | 18108529 | 7205  | 0.03 | C_unshiu_00341 | 73054  | 80268  | 7215  | 2.89  | 99.68 |
| chr1 | 18108490 | 18118068 | 9579  | 0.04 | C_unshiu_00341 | 80285  | 89894  | 9610  | 3.86  | 98.91 |
| chr1 | 18118155 | 18126761 | 8607  | 0.04 | C_unshiu_00341 | 89892  | 98486  | 8595  | 3.45  | 98.47 |
| chr1 | 18126994 | 18176607 | 49614 | 0.22 | C_unshiu_00341 | 98700  | 148367 | 49668 | 19.93 | 99.68 |
| chr1 | 18178625 | 18236813 | 58189 | 0.26 | C_unshiu_00341 | 149232 | 207488 | 58257 | 23.37 | 99.4  |
| chr1 | 18242815 | 18259856 | 17042 | 0.08 | C_unshiu_00341 | 219133 | 236236 | 17104 | 6.86  | 98.98 |
| chr1 | 18261645 | 18263568 | 1924  | 0.01 | C_unshiu_00341 | 237666 | 239586 | 1921  | 0.77  | 99.64 |
| chr1 | 18264844 | 18265949 | 1106  | 0    | C_unshiu_00341 | 245476 | 246581 | 1106  | 0.44  | 100   |
| chr1 | 18272929 | 18310699 | 37771 | 0.17 | C_unshiu_00150 | 1415   | 39213  | 37799 | 9.8   | 99.28 |
| chr1 | 18310691 | 18341145 | 30455 | 0.14 | C_unshiu_00150 | 40374  | 70863  | 30490 | 7.91  | 99.43 |
| chr1 | 18341685 | 18365238 | 23554 | 0.1  | C_unshiu_00150 | 70855  | 94495  | 23641 | 6.13  | 99.29 |
| chr1 | 18365720 | 18369089 | 3370  | 0.01 | C_unshiu_00150 | 96103  | 99473  | 3371  | 0.87  | 99.05 |
| chr1 | 18371921 | 18415072 | 43152 | 0.19 | C_unshiu_00150 | 101658 | 144906 | 43249 | 11.21 | 99.36 |
| chr1 | 18418461 | 18439790 | 21330 | 0.09 | C_unshiu_00150 | 148555 | 169876 | 21322 | 5.53  | 99.38 |
| chr1 | 18440781 | 18442113 | 1333  | 0.01 | C_unshiu_00150 | 170662 | 171992 | 1331  | 0.35  | 99.62 |
| chr1 | 18445760 | 18464310 | 18551 | 0.08 | C_unshiu_00150 | 188652 | 207228 | 18577 | 4.82  | 99.04 |
| chr1 | 18465580 | 18501507 | 35928 | 0.16 | C_unshiu_00150 | 207808 | 243785 | 35978 | 9.33  | 99.48 |
| chr1 | 18509429 | 18545538 | 36110 | 0.16 | C_unshiu_00150 | 254869 | 291083 | 36215 | 9.39  | 99.27 |
| chr1 | 18547635 | 18566873 | 19239 | 0.09 | C_unshiu_00150 | 294031 | 313304 | 19274 | 5     | 99.54 |
| chr1 | 18566670 | 18568455 | 1786  | 0.01 | C_unshiu_00150 | 313302 | 315087 | 1786  | 0.46  | 99.94 |
| chr1 | 18570335 | 18589638 | 19304 | 0.09 | C_unshiu_00150 | 316296 | 335587 | 19292 | 5     | 99.44 |
| chr1 | 18589633 | 18599965 | 10333 | 0.05 | C_unshiu_00150 | 335740 | 346044 | 10305 | 2.67  | 98.78 |
| chr1 | 18599981 | 18633523 | 33543 | 0.15 | C_unshiu_00150 | 347543 | 381074 | 33532 | 8.69  | 99.24 |
| chr1 | 18630242 | 18665131 | 34890 | 0.16 | C_unshiu_00498 | 162496 | 127534 | 34963 | 18.18 | 99.02 |
| chr1 | 18666456 | 18673597 | 7142  | 0.03 | C_unshiu_00498 | 127414 | 120213 | 7202  | 3.74  | 98.68 |
| chr1 | 18681739 | 18706645 | 24907 | 0.11 | C_unshiu_00498 | 113358 | 88490  | 24869 | 12.93 | 99.14 |
| chr1 | 18710240 | 18722586 | 12347 | 0.05 | C_unshiu_00498 | 85485  | 73164  | 12322 | 6.41  | 99.03 |
| chr1 | 18725727 | 18753010 | 27284 | 0.12 | C_unshiu_00498 | 67513  | 40037  | 27477 | 14.29 | 98.84 |
| chr1 | 18753169 | 18755204 | 2036  | 0.01 | C_unshiu_00498 | 39490  | 37442  | 2049  | 1.07  | 98.68 |
| chr1 | 18797838 | 18801368 | 3531  | 0.02 | C_unshiu_00066 | 540903 | 537372 | 3532  | 0.64  | 98.87 |
| chr1 | 18812472 | 18813956 | 1485  | 0.01 | C_unshiu_00066 | 526754 | 525269 | 1486  | 0.27  | 99.6  |
| chr1 | 18814983 | 18823342 | 8360  | 0.04 | C_unshiu_00066 | 523736 | 515373 | 8364  | 1.52  | 99.45 |
| chr1 | 18831323 | 18833763 | 2441  | 0.01 | C_unshiu_00066 | 506724 | 504272 | 2453  | 0.45  | 99.1  |

|      |          |          |        |      |                |        |        |        |       |       |
|------|----------|----------|--------|------|----------------|--------|--------|--------|-------|-------|
| chr1 | 18833766 | 18842210 | 8445   | 0.04 | C_unshiu_00066 | 503585 | 495131 | 8455   | 1.54  | 98.92 |
| chr1 | 18842318 | 18870991 | 28674  | 0.13 | C_unshiu_00066 | 495204 | 466510 | 28695  | 5.21  | 99.25 |
| chr1 | 18871817 | 18883525 | 11709  | 0.05 | C_unshiu_00066 | 466308 | 454630 | 11679  | 2.12  | 99.62 |
| chr1 | 18884184 | 18896570 | 12387  | 0.06 | C_unshiu_00066 | 454114 | 441711 | 12404  | 2.25  | 99.52 |
| chr1 | 18902235 | 18908800 | 6566   | 0.03 | C_unshiu_00066 | 436568 | 430000 | 6569   | 1.19  | 99.85 |
| chr1 | 18909574 | 18917085 | 7512   | 0.03 | C_unshiu_00066 | 429995 | 422478 | 7518   | 1.37  | 99.69 |
| chr1 | 18922302 | 18944679 | 22378  | 0.1  | C_unshiu_00066 | 420352 | 397922 | 22431  | 4.07  | 98.83 |
| chr1 | 18944684 | 18965546 | 20863  | 0.09 | C_unshiu_00066 | 397993 | 377111 | 20883  | 3.79  | 98.95 |
| chr1 | 18967137 | 18978739 | 11603  | 0.05 | C_unshiu_00066 | 375183 | 363572 | 11612  | 2.11  | 99.73 |
| chr1 | 18982575 | 19011731 | 29157  | 0.13 | C_unshiu_00066 | 359580 | 330336 | 29245  | 5.31  | 99    |
| chr1 | 19025397 | 19074070 | 48674  | 0.22 | C_unshiu_00066 | 316375 | 267777 | 48599  | 8.82  | 99.33 |
| chr1 | 19074968 | 19093879 | 18912  | 0.08 | C_unshiu_00066 | 267688 | 248762 | 18927  | 3.44  | 99.5  |
| chr1 | 19094448 | 19109886 | 15439  | 0.07 | C_unshiu_00066 | 248698 | 233233 | 15466  | 2.81  | 99.17 |
| chr1 | 19116882 | 19123392 | 6511   | 0.03 | C_unshiu_00066 | 226887 | 220358 | 6530   | 1.19  | 99.34 |
| chr1 | 19123665 | 19132973 | 9309   | 0.04 | C_unshiu_00066 | 220019 | 210744 | 9276   | 1.68  | 99.3  |
| chr1 | 19137507 | 19141616 | 4110   | 0.02 | C_unshiu_00066 | 206696 | 202568 | 4129   | 0.75  | 98.52 |
| chr1 | 19141613 | 19153750 | 12138  | 0.05 | C_unshiu_00066 | 202443 | 190279 | 12165  | 2.21  | 99.02 |
| chr1 | 19159974 | 19165627 | 5654   | 0.03 | C_unshiu_00066 | 185455 | 179798 | 5658   | 1.03  | 98.99 |
| chr1 | 19167119 | 19197639 | 30521  | 0.14 | C_unshiu_00066 | 179506 | 148939 | 30568  | 5.55  | 99.63 |
| chr1 | 19220199 | 19221522 | 1324   | 0.01 | C_unshiu_00066 | 126930 | 125609 | 1322   | 0.24  | 98.34 |
| chr1 | 19221514 | 19235277 | 13764  | 0.06 | C_unshiu_00066 | 119392 | 105629 | 13764  | 2.5   | 98.78 |
| chr1 | 19246151 | 19247555 | 1405   | 0.01 | C_unshiu_00066 | 93819  | 92413  | 1407   | 0.26  | 99.57 |
| chr1 | 19247654 | 19264213 | 16560  | 0.07 | C_unshiu_00066 | 92306  | 75743  | 16564  | 3.01  | 98.21 |
| chr1 | 19264204 | 19275049 | 10846  | 0.05 | C_unshiu_00066 | 75246  | 64391  | 10856  | 1.97  | 99.27 |
| chr1 | 19275276 | 19277106 | 1831   | 0.01 | C_unshiu_00066 | 62553  | 64384  | 1832   | 0.33  | 98.26 |
| chr1 | 19278105 | 19284791 | 6687   | 0.03 | C_unshiu_00066 | 61922  | 55231  | 6692   | 1.22  | 99.12 |
| chr1 | 19287079 | 19293238 | 6160   | 0.03 | C_unshiu_00066 | 52905  | 46752  | 6154   | 1.12  | 99.46 |
| chr1 | 19293163 | 19333835 | 40673  | 0.18 | C_unshiu_00066 | 46389  | 5661   | 40729  | 7.4   | 99.18 |
| chr1 | 19334453 | 19336983 | 2531   | 0.01 | C_unshiu_00066 | 5286   | 2756   | 2531   | 0.46  | 99.96 |
| chr1 | 19337000 | 19339413 | 2414   | 0.01 | C_unshiu_00066 | 2413   | 1      | 2413   | 0.44  | 99.71 |
| chr1 | 19350742 | 19354572 | 3831   | 0.02 | C_unshiu_00315 | 122578 | 126404 | 3827   | 1.48  | 99.14 |
| chr1 | 19354569 | 19377128 | 22560  | 0.1  | C_unshiu_00315 | 126490 | 149128 | 22639  | 8.75  | 98.47 |
| chr1 | 19377121 | 19395599 | 18479  | 0.08 | C_unshiu_00315 | 149578 | 168059 | 18482  | 7.14  | 99.7  |
| chr1 | 19395601 | 19396889 | 1289   | 0.01 | C_unshiu_00315 | 168208 | 169498 | 1291   | 0.5   | 99.3  |
| chr1 | 19399345 | 19410786 | 11442  | 0.05 | C_unshiu_00315 | 174878 | 186341 | 11464  | 4.43  | 99.26 |
| chr1 | 19410809 | 19436586 | 25778  | 0.11 | C_unshiu_00315 | 186326 | 212157 | 25832  | 9.98  | 98.73 |
| chr1 | 19437314 | 19476596 | 39283  | 0.17 | C_unshiu_00315 | 212153 | 251426 | 39274  | 15.18 | 99.1  |
| chr1 | 19481129 | 19483701 | 2573   | 0.01 | C_unshiu_00583 | 126965 | 129557 | 2593   | 1.52  | 98.61 |
| chr1 | 19483752 | 19489826 | 6075   | 0.03 | C_unshiu_00583 | 129556 | 135630 | 6075   | 3.56  | 99.9  |
| chr1 | 19500252 | 19506482 | 6231   | 0.03 | C_unshiu_00583 | 146514 | 152752 | 6239   | 3.65  | 99.7  |
| chr1 | 19507907 | 19513429 | 5523   | 0.02 | C_unshiu_00583 | 152747 | 158278 | 5532   | 3.24  | 99.3  |
| chr1 | 19513565 | 19521118 | 7554   | 0.03 | C_unshiu_00583 | 158358 | 165883 | 7526   | 4.41  | 98.84 |
| chr1 | 19521899 | 19523583 | 1685   | 0.01 | C_unshiu_00583 | 167210 | 168899 | 1690   | 0.99  | 98.76 |
| chr1 | 19524177 | 19525903 | 1727   | 0.01 | C_unshiu_00131 | 411932 | 410205 | 1728   | 0.42  | 99.65 |
| chr1 | 19526290 | 19528697 | 2408   | 0.01 | C_unshiu_00131 | 409556 | 407148 | 2409   | 0.58  | 99.3  |
| chr1 | 19531488 | 19535123 | 3636   | 0.02 | C_unshiu_00131 | 406415 | 402765 | 3651   | 0.89  | 99.42 |
| chr1 | 19539012 | 19639222 | 100211 | 0.45 | C_unshiu_00131 | 399511 | 299232 | 100280 | 24.32 | 99.5  |
| chr1 | 19639988 | 19647852 | 7865   | 0.03 | C_unshiu_00131 | 297824 | 289961 | 7864   | 1.91  | 99.38 |
| chr1 | 19647849 | 19657540 | 9692   | 0.04 | C_unshiu_00131 | 289626 | 279918 | 9709   | 2.36  | 99.4  |
| chr1 | 19658031 | 19675310 | 17280  | 0.08 | C_unshiu_00131 | 279303 | 261976 | 17328  | 4.2   | 98.9  |
| chr1 | 19675310 | 19682456 | 7147   | 0.03 | C_unshiu_00131 | 261853 | 254721 | 7133   | 1.73  | 98.98 |
| chr1 | 19685934 | 19687864 | 1931   | 0.01 | C_unshiu_00131 | 252976 | 251035 | 1942   | 0.47  | 98.71 |
| chr1 | 19688033 | 19710932 | 22900  | 0.1  | C_unshiu_00131 | 250895 | 227934 | 22962  | 5.57  | 99.46 |
| chr1 | 19710923 | 19724823 | 13901  | 0.06 | C_unshiu_00131 | 227339 | 213379 | 13961  | 3.39  | 98.39 |
| chr1 | 19724853 | 19727948 | 3096   | 0.01 | C_unshiu_00131 | 213129 | 210039 | 3091   | 0.75  | 98.78 |
| chr1 | 19728884 | 19736312 | 7429   | 0.03 | C_unshiu_00131 | 208182 | 200742 | 7441   | 1.8   | 99.49 |
| chr1 | 19737374 | 19738756 | 1383   | 0.01 | C_unshiu_00131 | 198610 | 197223 | 1388   | 0.34  | 98.27 |
| chr1 | 19738752 | 19748773 | 10022  | 0.04 | C_unshiu_00131 | 196893 | 186820 | 10074  | 2.44  | 98.6  |
| chr1 | 19748864 | 19766304 | 17441  | 0.08 | C_unshiu_00131 | 186689 | 169260 | 17430  | 4.23  | 99.42 |
| chr1 | 19766327 | 19770758 | 4432   | 0.02 | C_unshiu_00131 | 168611 | 164163 | 4449   | 1.08  | 99.01 |
| chr1 | 19770759 | 19813059 | 42301  | 0.19 | C_unshiu_00131 | 161691 | 119290 | 42402  | 10.29 | 98.96 |
| chr1 | 19816236 | 19831968 | 15733  | 0.07 | C_unshiu_00131 | 110574 | 94760  | 15815  | 3.84  | 99.01 |
| chr1 | 19832679 | 19836131 | 3453   | 0.02 | C_unshiu_00131 | 93120  | 89655  | 3466   | 0.84  | 98.04 |
| chr1 | 19837787 | 19841114 | 3328   | 0.01 | C_unshiu_00131 | 86723  | 83397  | 3327   | 0.81  | 98.71 |
| chr1 | 19856783 | 19876704 | 19922  | 0.09 | C_unshiu_00105 | 435859 | 415898 | 19962  | 4.43  | 99.48 |
| chr1 | 19876534 | 19880714 | 4181   | 0.02 | C_unshiu_00105 | 415898 | 411692 | 4207   | 0.93  | 98.67 |
| chr1 | 19880804 | 19893756 | 12953  | 0.06 | C_unshiu_00105 | 411692 | 398659 | 13034  | 2.89  | 98.65 |
| chr1 | 19894594 | 19906547 | 11954  | 0.05 | C_unshiu_00105 | 398251 | 386295 | 11957  | 2.65  | 99.37 |
| chr1 | 19907223 | 19912189 | 4967   | 0.02 | C_unshiu_00105 | 385039 | 380077 | 4963   | 1.1   | 98.96 |
| chr1 | 19912187 | 19935282 | 23096  | 0.1  | C_unshiu_00105 | 380125 | 356974 | 23152  | 5.14  | 99.24 |
| chr1 | 19935274 | 19993227 | 57954  | 0.26 | C_unshiu_00105 | 356337 | 298262 | 58076  | 12.88 | 99.2  |
| chr1 | 19993548 | 20002934 | 9387   | 0.04 | C_unshiu_00105 | 297929 | 288518 | 9412   | 2.09  | 99.29 |
| chr1 | 20002933 | 20047091 | 44159  | 0.2  | C_unshiu_00105 | 288302 | 244103 | 44200  | 9.81  | 99.11 |
| chr1 | 20047083 | 20066535 | 19453  | 0.09 | C_unshiu_00105 | 243207 | 223776 | 19432  | 4.31  | 98.98 |
| chr1 | 20067229 | 20070133 | 2905   | 0.01 | C_unshiu_00105 | 222327 | 219405 | 2923   | 0.65  | 98.02 |
| chr1 | 20077027 | 20118789 | 41763  | 0.19 | C_unshiu_00105 | 219672 | 177817 | 41856  | 9.29  | 99.17 |
| chr1 | 20121655 | 20139380 | 17726  | 0.08 | C_unshiu_00105 | 177183 | 159466 | 17718  | 3.93  | 99.32 |
| chr1 | 20133185 | 20139380 | 6196   | 0.03 | C_unshiu_03064 | 10752  | 4541   | 6212   | 57.78 | 99.28 |
| chr1 | 20140350 | 20141830 | 1481   | 0.01 | C_unshiu_02216 | 14424  | 15905  | 1482   | 4.53  | 98.31 |

|      |          |          |       |      |                |        |        |       |       |       |
|------|----------|----------|-------|------|----------------|--------|--------|-------|-------|-------|
| chr1 | 20140350 | 20141830 | 1481  | 0.01 | C_unshiu_03064 | 2600   | 1121   | 1480  | 13.76 | 99.19 |
| chr1 | 20145958 | 20163774 | 17817 | 0.08 | C_unshiu_00105 | 156047 | 138292 | 17756 | 3.94  | 98.13 |
| chr1 | 20165720 | 20167016 | 1297  | 0.01 | C_unshiu_00105 | 134920 | 133624 | 1297  | 0.29  | 99.92 |
| chr1 | 20168709 | 20200594 | 31886 | 0.14 | C_unshiu_00105 | 132432 | 100548 | 31885 | 7.07  | 99.5  |
| chr1 | 20200590 | 20208918 | 8329  | 0.04 | C_unshiu_00105 | 95463  | 87101  | 8363  | 1.86  | 99.44 |
| chr1 | 20208923 | 20211724 | 2802  | 0.01 | C_unshiu_00105 | 87143  | 84339  | 2805  | 0.62  | 99.68 |
| chr1 | 20211989 | 20218488 | 6500  | 0.03 | C_unshiu_00105 | 83520  | 77024  | 6497  | 1.44  | 99.85 |
| chr1 | 20222849 | 20224339 | 1491  | 0.01 | C_unshiu_00321 | 159388 | 160877 | 1490  | 0.58  | 98.66 |
| chr1 | 20229691 | 20234795 | 5105  | 0.02 | C_unshiu_00105 | 75213  | 70093  | 5121  | 1.14  | 99.3  |
| chr1 | 20235079 | 20268263 | 33185 | 0.15 | C_unshiu_00105 | 69874  | 36860  | 33015 | 7.32  | 98.46 |
| chr1 | 20261298 | 20271147 | 9850  | 0.04 | C_unshiu_00105 | 26995  | 36847  | 9853  | 2.19  | 99.19 |
| chr1 | 20271143 | 20303986 | 32844 | 0.15 | C_unshiu_00347 | 14     | 32922  | 32909 | 13.3  | 99.05 |
| chr1 | 20307419 | 20309979 | 2561  | 0.01 | C_unshiu_00057 | 6795   | 9335   | 2541  | 0.43  | 98.52 |
| chr1 | 20314965 | 20328318 | 13354 | 0.06 | C_unshiu_00347 | 35622  | 49031  | 13410 | 5.42  | 99.26 |
| chr1 | 20330415 | 20347128 | 16714 | 0.07 | C_unshiu_00347 | 49193  | 65922  | 16730 | 6.76  | 99.64 |
| chr1 | 20347430 | 20357362 | 9933  | 0.04 | C_unshiu_00347 | 66223  | 76163  | 9941  | 4.02  | 99.72 |
| chr1 | 20357819 | 20361422 | 3604  | 0.02 | C_unshiu_00347 | 77354  | 80972  | 3619  | 1.46  | 98.59 |
| chr1 | 20361766 | 20401345 | 39580 | 0.18 | C_unshiu_00347 | 81993  | 121608 | 39616 | 16.01 | 99.3  |
| chr1 | 20402059 | 20434331 | 32273 | 0.14 | C_unshiu_00347 | 122598 | 154846 | 32249 | 13.03 | 99.01 |
| chr1 | 20436611 | 20438653 | 2043  | 0.01 | C_unshiu_00347 | 154873 | 156916 | 2044  | 0.83  | 99.22 |
| chr1 | 20441715 | 20442874 | 1160  | 0.01 | C_unshiu_00347 | 159667 | 160822 | 1156  | 0.47  | 99.31 |
| chr1 | 20443604 | 20445632 | 2029  | 0.01 | C_unshiu_00347 | 162193 | 164206 | 2014  | 0.81  | 98.62 |
| chr1 | 20445624 | 20458136 | 12513 | 0.06 | C_unshiu_00347 | 165307 | 177855 | 12549 | 5.07  | 99.33 |
| chr1 | 20458741 | 20472877 | 14137 | 0.06 | C_unshiu_00347 | 179036 | 193095 | 14060 | 5.68  | 98.22 |
| chr1 | 20490512 | 20513770 | 23259 | 0.1  | C_unshiu_00347 | 207791 | 231098 | 23308 | 9.42  | 98.16 |
| chr1 | 20514445 | 20525144 | 10700 | 0.05 | C_unshiu_00347 | 231993 | 242707 | 10715 | 4.33  | 98.68 |
| chr1 | 20533759 | 20541755 | 7997  | 0.04 | C_unshiu_02678 | 8327   | 350    | 7978  | 39.25 | 98.59 |
| chr1 | 20556660 | 20568051 | 11392 | 0.05 | C_unshiu_01075 | 75319  | 63953  | 11367 | 11.56 | 98.39 |
| chr1 | 20573803 | 20575600 | 1798  | 0.01 | C_unshiu_01075 | 57529  | 55730  | 1800  | 1.83  | 99.67 |
| chr1 | 20585532 | 20611013 | 25482 | 0.11 | C_unshiu_01075 | 51088  | 25574  | 25515 | 25.94 | 98.4  |
| chr1 | 20611021 | 20612199 | 1179  | 0.01 | C_unshiu_02828 | 1178   | 1      | 1178  | 6.84  | 98.56 |
| chr1 | 20619378 | 20625398 | 6021  | 0.03 | C_unshiu_01075 | 16786  | 10724  | 6063  | 6.16  | 98.66 |
| chr1 | 20625455 | 20627786 | 2332  | 0.01 | C_unshiu_01075 | 10416  | 8093   | 2324  | 2.36  | 98.54 |
| chr1 | 20627787 | 20634579 | 6793  | 0.03 | C_unshiu_01045 | 69030  | 75822  | 6793  | 6.71  | 100   |
| chr1 | 20638265 | 20640326 | 2062  | 0.01 | C_unshiu_00732 | 19579  | 17518  | 2062  | 1.49  | 98.64 |
| chr1 | 20645369 | 20646414 | 1046  | 0    | C_unshiu_00414 | 131720 | 132764 | 1045  | 0.47  | 99.9  |
| chr1 | 20646435 | 20647694 | 1260  | 0.01 | C_unshiu_00732 | 15656  | 14397  | 1260  | 0.91  | 100   |
| chr1 | 20659974 | 20662149 | 2176  | 0.01 | C_unshiu_00732 | 2180   | 1      | 2180  | 1.57  | 99.04 |
| chr1 | 20679193 | 20680524 | 1332  | 0.01 | C_unshiu_02197 | 21927  | 20596  | 1332  | 4     | 100   |
| chr1 | 20686948 | 20689780 | 2833  | 0.01 | C_unshiu_00414 | 169258 | 172089 | 2832  | 1.28  | 98.73 |
| chr1 | 20701231 | 20704994 | 3764  | 0.02 | C_unshiu_00414 | 183811 | 187583 | 3773  | 1.71  | 98.68 |
| chr1 | 20715233 | 20721144 | 5912  | 0.03 | C_unshiu_00248 | 19704  | 13807  | 5898  | 1.99  | 99.29 |
| chr1 | 20721916 | 20724896 | 2981  | 0.01 | C_unshiu_00095 | 313343 | 310371 | 2973  | 0.64  | 98.39 |
| chr1 | 20728571 | 20729845 | 1275  | 0.01 | C_unshiu_01745 | 20914  | 22189  | 1276  | 2.51  | 98.91 |
| chr1 | 20729845 | 20731707 | 1863  | 0.01 | C_unshiu_01745 | 20031  | 21892  | 1862  | 3.67  | 98.19 |
| chr1 | 20735786 | 20737380 | 1595  | 0.01 | C_unshiu_01745 | 22488  | 24094  | 1607  | 3.17  | 98.26 |
| chr1 | 20738907 | 20747438 | 8532  | 0.04 | C_unshiu_01745 | 24201  | 32725  | 8525  | 16.8  | 98.19 |
| chr1 | 20751164 | 20753915 | 2752  | 0.01 | C_unshiu_01745 | 35455  | 38207  | 2753  | 5.43  | 99.13 |
| chr1 | 20753225 | 20760153 | 6929  | 0.03 | C_unshiu_02081 | 30398  | 23460  | 6939  | 18.61 | 98.85 |
| chr1 | 20760177 | 20766271 | 6095  | 0.03 | C_unshiu_00237 | 297388 | 291292 | 6097  | 2.01  | 98.11 |
| chr1 | 20766460 | 20768667 | 2208  | 0.01 | C_unshiu_00237 | 291052 | 288845 | 2208  | 0.73  | 99.95 |
| chr1 | 20774267 | 20775356 | 1090  | 0    | C_unshiu_01745 | 39058  | 40152  | 1095  | 2.16  | 98.72 |
| chr1 | 20775376 | 20776667 | 1292  | 0.01 | C_unshiu_01745 | 41674  | 42965  | 1292  | 2.55  | 100   |
| chr1 | 20776764 | 20791030 | 14267 | 0.06 | C_unshiu_00237 | 279682 | 265311 | 14372 | 4.74  | 98.37 |
| chr1 | 20832944 | 20835700 | 2757  | 0.01 | C_unshiu_00237 | 231704 | 228947 | 2758  | 0.91  | 99.27 |
| chr1 | 20835711 | 20837753 | 2043  | 0.01 | C_unshiu_00237 | 227967 | 225924 | 2044  | 0.67  | 99.27 |
| chr1 | 20838047 | 20841922 | 3876  | 0.02 | C_unshiu_00237 | 225495 | 221609 | 3887  | 1.28  | 98.54 |
| chr1 | 20847019 | 20851586 | 4568  | 0.02 | C_unshiu_00237 | 216449 | 211886 | 4564  | 1.5   | 98.73 |
| chr1 | 20851726 | 20853590 | 1865  | 0.01 | C_unshiu_00237 | 211345 | 209480 | 1866  | 0.62  | 98.5  |
| chr1 | 20853598 | 20874467 | 20870 | 0.09 | C_unshiu_00237 | 208610 | 187804 | 20807 | 6.86  | 98.03 |
| chr1 | 20894027 | 20908855 | 14829 | 0.07 | C_unshiu_00237 | 169933 | 155040 | 14894 | 4.91  | 98.5  |
| chr1 | 20928702 | 20943964 | 15263 | 0.07 | C_unshiu_00237 | 137545 | 122270 | 15276 | 5.04  | 99.67 |
| chr1 | 20963532 | 20969765 | 6234  | 0.03 | C_unshiu_00237 | 118183 | 111904 | 6280  | 2.07  | 98.36 |
| chr1 | 20982710 | 20986994 | 4285  | 0.02 | C_unshiu_00237 | 98358  | 94060  | 4299  | 1.42  | 98.79 |
| chr1 | 20987375 | 20994430 | 7056  | 0.03 | C_unshiu_00237 | 93247  | 86156  | 7092  | 2.34  | 98.9  |
| chr1 | 21001914 | 21005990 | 4077  | 0.02 | C_unshiu_02756 | 1      | 4082   | 4082  | 21.55 | 99.14 |
| chr1 | 21007268 | 21017034 | 9767  | 0.04 | C_unshiu_02756 | 4416   | 14165  | 9750  | 51.48 | 98.89 |
| chr1 | 21017034 | 21018190 | 1157  | 0.01 | C_unshiu_02756 | 16059  | 17214  | 1156  | 6.1   | 99.4  |
| chr1 | 21018398 | 21020141 | 1744  | 0.01 | C_unshiu_02756 | 17197  | 18940  | 1744  | 9.21  | 99.14 |
| chr1 | 21024174 | 21033417 | 9244  | 0.04 | C_unshiu_00237 | 60257  | 50948  | 9310  | 3.07  | 98.05 |
| chr1 | 21049164 | 21067016 | 17853 | 0.08 | C_unshiu_00237 | 45566  | 27672  | 17895 | 5.9   | 98.88 |
| chr1 | 21067157 | 21082091 | 14935 | 0.07 | C_unshiu_00237 | 27681  | 12730  | 14952 | 4.93  | 98.65 |
| chr1 | 21090524 | 21094975 | 4452  | 0.02 | C_unshiu_00348 | 231510 | 227046 | 4465  | 1.81  | 99.44 |
| chr1 | 21104441 | 21109746 | 5306  | 0.02 | C_unshiu_00348 | 216082 | 210757 | 5326  | 2.16  | 98.06 |
| chr1 | 21133149 | 21137665 | 4517  | 0.02 | C_unshiu_00348 | 190626 | 186099 | 4528  | 1.84  | 98.92 |
| chr1 | 21139193 | 21145273 | 6081  | 0.03 | C_unshiu_00348 | 184271 | 178160 | 6112  | 2.48  | 98.14 |
| chr1 | 21145707 | 21151180 | 5474  | 0.02 | C_unshiu_00348 | 177221 | 171708 | 5514  | 2.24  | 98.21 |
| chr1 | 21151181 | 21172450 | 21270 | 0.09 | C_unshiu_00348 | 171588 | 150285 | 21304 | 8.65  | 98.17 |
| chr1 | 21194948 | 21206733 | 11786 | 0.05 | C_unshiu_00348 | 133771 | 121922 | 11850 | 4.81  | 98.05 |

|      |          |          |       |      |                |        |        |       |       |       |
|------|----------|----------|-------|------|----------------|--------|--------|-------|-------|-------|
| chr1 | 21223237 | 21234977 | 11741 | 0.05 | C_unshiu_00348 | 110357 | 98551  | 11807 | 4.79  | 98.55 |
| chr1 | 21246952 | 21259184 | 12233 | 0.05 | C_unshiu_00348 | 86433  | 74165  | 12269 | 4.98  | 98.76 |
| chr1 | 21264949 | 21267720 | 2772  | 0.01 | C_unshiu_00348 | 68163  | 65385  | 2779  | 1.13  | 99.5  |
| chr1 | 21269453 | 21275562 | 6110  | 0.03 | C_unshiu_00348 | 64055  | 57926  | 6130  | 2.49  | 98.86 |
| chr1 | 21276341 | 21284745 | 8405  | 0.04 | C_unshiu_00348 | 57057  | 48660  | 8398  | 3.41  | 98.35 |
| chr1 | 21286971 | 21301186 | 14216 | 0.06 | C_unshiu_00348 | 46444  | 32169  | 14276 | 5.79  | 98.96 |
| chr1 | 21298938 | 21302038 | 3101  | 0.01 | C_unshiu_01142 | 1049   | 4164   | 3116  | 3.4   | 99.04 |
| chr1 | 21306014 | 21323001 | 16988 | 0.08 | C_unshiu_00348 | 27636  | 10642  | 16995 | 6.9   | 98.75 |
| chr1 | 21328708 | 21342644 | 13937 | 0.06 | C_unshiu_01142 | 17123  | 31002  | 13880 | 15.13 | 98.07 |
| chr1 | 21342774 | 21367159 | 24386 | 0.11 | C_unshiu_01142 | 31526  | 55912  | 24387 | 26.59 | 98.78 |
| chr1 | 21358024 | 21372050 | 14027 | 0.06 | C_unshiu_00562 | 156218 | 142207 | 14012 | 8     | 98.56 |
| chr1 | 21413097 | 21415891 | 2795  | 0.01 | C_unshiu_00562 | 101915 | 99121  | 2795  | 1.6   | 98.12 |
| chr1 | 21419492 | 21424288 | 4797  | 0.02 | C_unshiu_00562 | 95438  | 90658  | 4781  | 2.73  | 99.04 |
| chr1 | 21456506 | 21470138 | 13633 | 0.06 | C_unshiu_00562 | 55554  | 41870  | 13685 | 7.81  | 98.88 |
| chr1 | 21472823 | 21483169 | 10347 | 0.05 | C_unshiu_03025 | 10340  | 1      | 10340 | 84.54 | 98.06 |
| chr1 | 21507927 | 21522588 | 14662 | 0.07 | C_unshiu_01226 | 82279  | 67582  | 14698 | 17.75 | 98.76 |
| chr1 | 21523619 | 21533569 | 9951  | 0.04 | C_unshiu_01226 | 65954  | 55982  | 9973  | 12.04 | 98.48 |
| chr1 | 21539609 | 21552226 | 12618 | 0.06 | C_unshiu_01447 | 41826  | 29240  | 12587 | 18.87 | 98.04 |
| chr1 | 21552220 | 21553478 | 1259  | 0.01 | C_unshiu_01447 | 29012  | 27754  | 1259  | 1.89  | 99.52 |
| chr1 | 21555007 | 21566390 | 11384 | 0.05 | C_unshiu_01447 | 27775  | 16301  | 11475 | 17.2  | 98.15 |
| chr1 | 21571346 | 21576611 | 5266  | 0.02 | C_unshiu_01447 | 10945  | 5689   | 5257  | 7.88  | 98.58 |
| chr1 | 21580394 | 21613434 | 33041 | 0.15 | C_unshiu_01997 | 7436   | 40694  | 33259 | 81.72 | 98.04 |
| chr1 | 21631356 | 21634738 | 3383  | 0.02 | C_unshiu_01195 | 56301  | 52913  | 3389  | 3.93  | 98.88 |
| chr1 | 21651336 | 21664942 | 13607 | 0.06 | C_unshiu_02224 | 32497  | 18892  | 13606 | 41.87 | 99.91 |
| chr1 | 21673286 | 21674792 | 1507  | 0.01 | C_unshiu_02224 | 11840  | 10343  | 1498  | 4.61  | 98.94 |
| chr1 | 21675146 | 21676239 | 1094  | 0    | C_unshiu_01195 | 26233  | 25139  | 1095  | 1.27  | 99.91 |
| chr1 | 21676347 | 21678896 | 2550  | 0.01 | C_unshiu_01195 | 24601  | 22051  | 2551  | 2.96  | 99.45 |
| chr1 | 21693446 | 21697348 | 3903  | 0.02 | C_unshiu_00084 | 102592 | 98702  | 3891  | 0.82  | 98.98 |
| chr1 | 21720265 | 21727848 | 7584  | 0.03 | C_unshiu_00590 | 155898 | 148318 | 7581  | 4.47  | 99.38 |
| chr1 | 21767807 | 21788772 | 20966 | 0.09 | C_unshiu_00594 | 124476 | 145466 | 20991 | 12.44 | 99.4  |
| chr1 | 21789305 | 21807838 | 18534 | 0.08 | C_unshiu_00594 | 145462 | 164006 | 18545 | 10.99 | 99.47 |
| chr1 | 21805819 | 21808097 | 2279  | 0.01 | C_unshiu_00441 | 5586   | 7864   | 2279  | 1.08  | 99.03 |
| chr1 | 21808097 | 21812568 | 4472  | 0.02 | C_unshiu_00441 | 8521   | 13006  | 4486  | 2.13  | 98.57 |
| chr1 | 21814432 | 21818172 | 3741  | 0.02 | C_unshiu_00441 | 15016  | 18757  | 3742  | 1.77  | 98.5  |
| chr1 | 21834790 | 21836845 | 2056  | 0.01 | C_unshiu_00441 | 32451  | 34504  | 2054  | 0.97  | 99.03 |
| chr1 | 21836864 | 21837901 | 1038  | 0    | C_unshiu_00441 | 45463  | 46500  | 1038  | 0.49  | 100   |
| chr1 | 21888615 | 21893947 | 5333  | 0.02 | C_unshiu_00441 | 83498  | 88844  | 5347  | 2.53  | 98.95 |
| chr1 | 21895691 | 21913723 | 18033 | 0.08 | C_unshiu_00441 | 103133 | 121137 | 18005 | 8.53  | 99.13 |
| chr1 | 21913715 | 21925162 | 11448 | 0.05 | C_unshiu_00441 | 121801 | 133271 | 11471 | 5.43  | 98.71 |
| chr1 | 21929322 | 21936352 | 7031  | 0.03 | C_unshiu_00441 | 136685 | 143711 | 7027  | 3.33  | 99.74 |
| chr1 | 21940523 | 21952019 | 11497 | 0.05 | C_unshiu_01469 | 19213  | 30712  | 11500 | 17.57 | 99.9  |
| chr1 | 21952019 | 21965254 | 13236 | 0.06 | C_unshiu_01469 | 31152  | 44397  | 13246 | 20.24 | 99.65 |
| chr1 | 21963161 | 21978576 | 15416 | 0.07 | C_unshiu_00245 | 204886 | 189458 | 15429 | 5.16  | 98.7  |
| chr1 | 21988421 | 21991216 | 2796  | 0.01 | C_unshiu_00834 | 41680  | 38885  | 2796  | 2.24  | 99.89 |
| chr1 | 21992333 | 21994951 | 2619  | 0.01 | C_unshiu_00834 | 37498  | 34880  | 2619  | 2.1   | 99.92 |
| chr1 | 22011791 | 22018555 | 6765  | 0.03 | C_unshiu_01269 | 18478  | 25219  | 6742  | 8.48  | 98.29 |
| chr1 | 22019898 | 22021112 | 1215  | 0.01 | C_unshiu_00339 | 209309 | 210523 | 1215  | 0.49  | 99.34 |
| chr1 | 22022943 | 22024472 | 1530  | 0.01 | C_unshiu_01269 | 28267  | 29794  | 1528  | 1.92  | 99.28 |
| chr1 | 22033774 | 22037977 | 4204  | 0.02 | C_unshiu_01269 | 38663  | 42858  | 4196  | 5.28  | 98.81 |
| chr1 | 22074997 | 22076596 | 1600  | 0.01 | C_unshiu_00591 | 69924  | 71523  | 1600  | 0.94  | 99.75 |
| chr1 | 22080504 | 22082570 | 2067  | 0.01 | C_unshiu_00591 | 75953  | 78017  | 2065  | 1.22  | 99.56 |
| chr1 | 22082565 | 22083783 | 1219  | 0.01 | C_unshiu_00591 | 78049  | 79270  | 1222  | 0.72  | 99.43 |
| chr1 | 22092276 | 22095042 | 2767  | 0.01 | C_unshiu_00591 | 89056  | 91807  | 2752  | 1.62  | 98.23 |
| chr1 | 22109518 | 22117568 | 8051  | 0.04 | C_unshiu_00591 | 105875 | 113911 | 8037  | 4.74  | 98.53 |
| chr1 | 22134854 | 22136396 | 1543  | 0.01 | C_unshiu_00591 | 135216 | 136758 | 1543  | 0.91  | 99.16 |
| chr1 | 22173685 | 22183511 | 9827  | 0.04 | C_unshiu_01731 | 31769  | 21892  | 9878  | 19.2  | 98.28 |
| chr1 | 22181385 | 22192906 | 11522 | 0.05 | C_unshiu_00305 | 221353 | 209824 | 11530 | 4.38  | 98.66 |
| chr1 | 22199502 | 22224778 | 25277 | 0.11 | C_unshiu_00305 | 203419 | 178150 | 25270 | 9.59  | 98.76 |
| chr1 | 22225208 | 22233173 | 7966  | 0.04 | C_unshiu_00305 | 177117 | 169132 | 7986  | 3.03  | 99.11 |
| chr1 | 22237983 | 22246974 | 8992  | 0.04 | C_unshiu_00305 | 160342 | 151344 | 8999  | 3.41  | 98.97 |
| chr1 | 22247932 | 22255495 | 7564  | 0.03 | C_unshiu_00305 | 149227 | 141712 | 7516  | 2.85  | 98.01 |
| chr1 | 22256345 | 22258456 | 2112  | 0.01 | C_unshiu_00305 | 141061 | 138951 | 2111  | 0.8   | 99.38 |
| chr1 | 22265629 | 22274069 | 8441  | 0.04 | C_unshiu_00305 | 129452 | 121005 | 8448  | 3.21  | 98.63 |
| chr1 | 22274157 | 22280803 | 6647  | 0.03 | C_unshiu_00305 | 120818 | 114172 | 6647  | 2.52  | 98.78 |
| chr1 | 22285872 | 22293142 | 7271  | 0.03 | C_unshiu_00305 | 114177 | 106857 | 7321  | 2.78  | 98.78 |
| chr1 | 22303634 | 22304905 | 1272  | 0.01 | C_unshiu_01511 | 54655  | 53384  | 1272  | 2.03  | 98.19 |
| chr1 | 22320237 | 22321283 | 1047  | 0    | C_unshiu_00305 | 93629  | 92583  | 1047  | 0.4   | 100   |
| chr1 | 22323345 | 22328039 | 4695  | 0.02 | C_unshiu_00305 | 90077  | 85366  | 4712  | 1.79  | 98.81 |
| chr1 | 22378738 | 22389981 | 11244 | 0.05 | C_unshiu_00305 | 40321  | 28992  | 11330 | 4.3   | 98.03 |
| chr1 | 22409171 | 22413915 | 4745  | 0.02 | C_unshiu_00305 | 14133  | 9373   | 4761  | 1.81  | 98.51 |
| chr1 | 22416738 | 22422373 | 5636  | 0.03 | C_unshiu_00305 | 7751   | 2106   | 5646  | 2.14  | 98.22 |
| chr1 | 22422576 | 22428041 | 5466  | 0.02 | C_unshiu_01994 | 34925  | 40396  | 5472  | 13.42 | 98.83 |
| chr1 | 22470194 | 22479686 | 9493  | 0.04 | C_unshiu_00590 | 41558  | 51076  | 9519  | 5.61  | 99.16 |
| chr1 | 22482485 | 22490505 | 8021  | 0.04 | C_unshiu_00590 | 50891  | 58928  | 8038  | 4.73  | 99.63 |
| chr2 | 1        | 2092     | 2092  | 0.01 | C_unshiu_00109 | 432197 | 430102 | 2096  | 0.47  | 98.9  |
| chr2 | 2272     | 3283     | 1012  | 0    | C_unshiu_00213 | 244424 | 243413 | 1012  | 0.31  | 99.9  |
| chr2 | 3903     | 6599     | 2697  | 0.01 | C_unshiu_00109 | 435567 | 432870 | 2698  | 0.61  | 99.56 |
| chr2 | 8355     | 9716     | 1362  | 0.01 | C_unshiu_00109 | 430103 | 428742 | 1362  | 0.31  | 100   |
| chr2 | 11018    | 27252    | 16235 | 0.08 | C_unshiu_00109 | 428224 | 411987 | 16238 | 3.65  | 99.97 |

|      |         |         |        |      |                |        |        |        |       |       |
|------|---------|---------|--------|------|----------------|--------|--------|--------|-------|-------|
| chr2 | 28159   | 116984  | 88826  | 0.42 | C_unshiu_00109 | 410673 | 321833 | 88841  | 19.99 | 99.97 |
| chr2 | 96986   | 150509  | 53524  | 0.25 | C_unshiu_00109 | 341840 | 288259 | 53582  | 12.06 | 99.88 |
| chr2 | 150682  | 162420  | 11739  | 0.06 | C_unshiu_00109 | 287638 | 275905 | 11734  | 2.64  | 99.82 |
| chr2 | 162951  | 187871  | 24921  | 0.12 | C_unshiu_00109 | 275510 | 250574 | 24937  | 5.61  | 99.81 |
| chr2 | 187615  | 224230  | 36616  | 0.17 | C_unshiu_00109 | 250573 | 213974 | 36600  | 8.23  | 99.75 |
| chr2 | 224231  | 242797  | 18567  | 0.09 | C_unshiu_00109 | 213874 | 195287 | 18588  | 4.18  | 99.11 |
| chr2 | 242798  | 260314  | 17517  | 0.08 | C_unshiu_00109 | 195156 | 177624 | 17533  | 3.94  | 99.67 |
| chr2 | 261395  | 270603  | 9209   | 0.04 | C_unshiu_00109 | 176635 | 167427 | 9209   | 2.07  | 100   |
| chr2 | 270713  | 289345  | 18633  | 0.09 | C_unshiu_00109 | 167108 | 148469 | 18640  | 4.19  | 99.47 |
| chr2 | 299364  | 425862  | 126499 | 0.59 | C_unshiu_00109 | 138111 | 11586  | 126526 | 28.47 | 99.9  |
| chr2 | 426142  | 427783  | 1642   | 0.01 | C_unshiu_00109 | 11297  | 9656   | 1642   | 0.37  | 99.94 |
| chr2 | 427783  | 437257  | 9475   | 0.04 | C_unshiu_00109 | 9472   | 1      | 9472   | 2.13  | 99.89 |
| chr2 | 436563  | 450602  | 14040  | 0.07 | C_unshiu_00746 | 6809   | 20855  | 14047  | 10.27 | 99.03 |
| chr2 | 455768  | 458145  | 2378   | 0.01 | C_unshiu_00569 | 2362   | 1      | 2362   | 1.35  | 98.16 |
| chr2 | 461074  | 463825  | 2752   | 0.01 | C_unshiu_00162 | 1      | 2748   | 2748   | 0.74  | 99.67 |
| chr2 | 465693  | 482110  | 16418  | 0.08 | C_unshiu_00162 | 5369   | 21785  | 16417  | 4.42  | 99.93 |
| chr2 | 482285  | 496781  | 14497  | 0.07 | C_unshiu_00162 | 22009  | 36509  | 14501  | 3.9   | 99.97 |
| chr2 | 503621  | 511778  | 8158   | 0.04 | C_unshiu_00162 | 45477  | 53622  | 8146   | 2.19  | 99.82 |
| chr2 | 512570  | 516866  | 4297   | 0.02 | C_unshiu_00162 | 54081  | 58368  | 4288   | 1.15  | 99.67 |
| chr2 | 518781  | 533309  | 14529  | 0.07 | C_unshiu_00162 | 58957  | 73486  | 14530  | 3.91  | 99.99 |
| chr2 | 539142  | 572322  | 33181  | 0.16 | C_unshiu_00162 | 78945  | 112046 | 33102  | 8.9   | 99.72 |
| chr2 | 552320  | 584282  | 31963  | 0.15 | C_unshiu_00162 | 92123  | 124018 | 31896  | 8.58  | 99.18 |
| chr2 | 590043  | 592248  | 2206   | 0.01 | C_unshiu_00162 | 122065 | 124271 | 2207   | 0.59  | 98.92 |
| chr2 | 593850  | 654504  | 60655  | 0.28 | C_unshiu_00162 | 127047 | 187759 | 60713  | 16.33 | 99.81 |
| chr2 | 656460  | 678483  | 22024  | 0.1  | C_unshiu_00162 | 188993 | 211016 | 22024  | 5.92  | 99.99 |
| chr2 | 678465  | 749105  | 70641  | 0.33 | C_unshiu_00162 | 211098 | 281742 | 70645  | 19    | 99.99 |
| chr2 | 755798  | 813312  | 57515  | 0.27 | C_unshiu_00162 | 288578 | 346092 | 57515  | 15.47 | 99.94 |
| chr2 | 812984  | 815887  | 2904   | 0.01 | C_unshiu_00162 | 350599 | 353503 | 2905   | 0.78  | 99.97 |
| chr2 | 817288  | 825867  | 8580   | 0.04 | C_unshiu_00162 | 355054 | 363633 | 8580   | 2.31  | 100   |
| chr2 | 828196  | 847235  | 19040  | 0.09 | C_unshiu_00072 | 6806   | 25866  | 19061  | 3.66  | 99.89 |
| chr2 | 862912  | 930438  | 67527  | 0.32 | C_unshiu_00072 | 33051  | 100758 | 67708  | 12.99 | 99.36 |
| chr2 | 910450  | 1090658 | 180209 | 0.85 | C_unshiu_00072 | 80782  | 261015 | 180234 | 34.58 | 99.97 |
| chr2 | 1097104 | 1102226 | 5123   | 0.02 | C_unshiu_00072 | 271960 | 277085 | 5126   | 0.98  | 99.73 |
| chr2 | 1101945 | 1132569 | 30625  | 0.14 | C_unshiu_00072 | 276910 | 307536 | 30627  | 5.88  | 99.85 |
| chr2 | 1131969 | 1148008 | 16040  | 0.08 | C_unshiu_00072 | 308282 | 324321 | 16040  | 3.08  | 99.99 |
| chr2 | 1148729 | 1152134 | 3406   | 0.02 | C_unshiu_00072 | 325039 | 328444 | 3406   | 0.65  | 99.85 |
| chr2 | 1152373 | 1161997 | 9625   | 0.05 | C_unshiu_00072 | 328731 | 338325 | 9595   | 1.84  | 99.67 |
| chr2 | 1161997 | 1166636 | 4640   | 0.02 | C_unshiu_00072 | 338470 | 343113 | 4644   | 0.89  | 99.76 |
| chr2 | 1166423 | 1193175 | 26753  | 0.13 | C_unshiu_00072 | 343319 | 370059 | 26741  | 5.13  | 99.91 |
| chr2 | 1197252 | 1212068 | 14817  | 0.07 | C_unshiu_00072 | 377579 | 392395 | 14817  | 2.84  | 99.99 |
| chr2 | 1218811 | 1233945 | 15135  | 0.07 | C_unshiu_00072 | 398857 | 413991 | 15135  | 2.9   | 100   |
| chr2 | 1233769 | 1246495 | 12727  | 0.06 | C_unshiu_00072 | 413988 | 426718 | 12731  | 2.44  | 99.97 |
| chr2 | 1247300 | 1257501 | 10202  | 0.05 | C_unshiu_00072 | 428234 | 438429 | 10196  | 1.96  | 99.53 |
| chr2 | 1263076 | 1264787 | 1712   | 0.01 | C_unshiu_00072 | 438810 | 440521 | 1712   | 0.33  | 100   |
| chr2 | 1264903 | 1272801 | 7899   | 0.04 | C_unshiu_00072 | 443063 | 450952 | 7890   | 1.51  | 99.75 |
| chr2 | 1275980 | 1298724 | 22745  | 0.11 | C_unshiu_00072 | 453118 | 475851 | 22734  | 4.36  | 99    |
| chr2 | 1298725 | 1303017 | 4293   | 0.02 | C_unshiu_00256 | 114564 | 118856 | 4293   | 1.48  | 99.98 |
| chr2 | 1303989 | 1306819 | 2831   | 0.01 | C_unshiu_00072 | 480451 | 483275 | 2825   | 0.54  | 99.08 |
| chr2 | 1309044 | 1313836 | 4793   | 0.02 | C_unshiu_00072 | 486326 | 491135 | 4810   | 0.92  | 99.65 |
| chr2 | 1316200 | 1329459 | 13260  | 0.06 | C_unshiu_00072 | 494422 | 507667 | 13246  | 2.54  | 99.53 |
| chr2 | 1329457 | 1342959 | 13503  | 0.06 | C_unshiu_00072 | 521224 | 507700 | 13525  | 2.59  | 98.84 |
| chr2 | 1350429 | 1408004 | 57576  | 0.27 | C_unshiu_00621 | 11     | 57642  | 57632  | 35.38 | 99.73 |
| chr2 | 1397972 | 1408313 | 10342  | 0.05 | C_unshiu_00621 | 47609  | 57986  | 10378  | 6.37  | 99.65 |
| chr2 | 1414074 | 1419843 | 5770   | 0.03 | C_unshiu_00621 | 63033  | 68844  | 5812   | 3.57  | 99.26 |
| chr2 | 1427323 | 1431244 | 3922   | 0.02 | C_unshiu_00550 | 156792 | 160714 | 3923   | 2.2   | 99.95 |
| chr2 | 1431245 | 1509969 | 78725  | 0.37 | C_unshiu_00550 | 155332 | 76591  | 78742  | 44.06 | 99.84 |
| chr2 | 1511901 | 1515619 | 3719   | 0.02 | C_unshiu_00550 | 74122  | 70404  | 3719   | 2.08  | 100   |
| chr2 | 1521902 | 1523199 | 1298   | 0.01 | C_unshiu_00195 | 336011 | 334715 | 1297   | 0.38  | 98.07 |
| chr2 | 1523195 | 1539131 | 15937  | 0.07 | C_unshiu_00550 | 54258  | 38330  | 15929  | 8.91  | 99.93 |
| chr2 | 1543689 | 1567187 | 23499  | 0.11 | C_unshiu_00550 | 31588  | 8106   | 23483  | 13.14 | 99.87 |
| chr2 | 1567350 | 1575537 | 8188   | 0.04 | C_unshiu_00550 | 8192   | 12     | 8181   | 4.58  | 99.77 |
| chr2 | 1579682 | 1638825 | 59144  | 0.28 | C_unshiu_00514 | 86952  | 27813  | 59140  | 31.65 | 99.99 |
| chr2 | 1637967 | 1666846 | 28880  | 0.14 | C_unshiu_00050 | 601120 | 572272 | 28849  | 4.79  | 99.76 |
| chr2 | 1646871 | 1816038 | 169168 | 0.79 | C_unshiu_00050 | 592216 | 423085 | 169132 | 28.08 | 99.84 |
| chr2 | 1820213 | 1926346 | 106134 | 0.5  | C_unshiu_00050 | 413224 | 307097 | 106128 | 17.62 | 99.97 |
| chr2 | 1906340 | 1938936 | 32597  | 0.15 | C_unshiu_00050 | 327090 | 294506 | 32585  | 5.41  | 99.96 |
| chr2 | 1945176 | 1953097 | 7922   | 0.04 | C_unshiu_00050 | 272792 | 280696 | 7905   | 1.31  | 99.29 |
| chr2 | 1956254 | 1993013 | 36760  | 0.17 | C_unshiu_00235 | 267137 | 230378 | 36760  | 12.04 | 100   |
| chr2 | 1993033 | 1994922 | 1890   | 0.01 | C_unshiu_00235 | 229984 | 228095 | 1890   | 0.62  | 100   |
| chr2 | 1995023 | 2022905 | 27883  | 0.13 | C_unshiu_00235 | 226976 | 199100 | 27877  | 9.13  | 99.94 |
| chr2 | 2022931 | 2097801 | 74871  | 0.35 | C_unshiu_00235 | 199440 | 124562 | 74879  | 24.52 | 99.94 |
| chr2 | 2097798 | 2115723 | 17926  | 0.08 | C_unshiu_00235 | 124455 | 106530 | 17926  | 5.87  | 100   |
| chr2 | 2115815 | 2144930 | 29116  | 0.14 | C_unshiu_00235 | 106405 | 77288  | 29118  | 9.53  | 99.99 |
| chr2 | 2147848 | 2208963 | 61116  | 0.29 | C_unshiu_00235 | 75612  | 14488  | 61125  | 20.01 | 99.96 |
| chr2 | 2207584 | 2209452 | 1869   | 0.01 | C_unshiu_00494 | 4436   | 6319   | 1884   | 0.98  | 98.57 |
| chr2 | 2216727 | 2274342 | 57616  | 0.27 | C_unshiu_00494 | 11066  | 68741  | 57676  | 29.88 | 99.85 |
| chr2 | 2254346 | 2325411 | 71066  | 0.33 | C_unshiu_00494 | 48752  | 119837 | 71086  | 36.83 | 99.95 |
| chr2 | 2305460 | 2347255 | 41796  | 0.2  | C_unshiu_00494 | 99859  | 141681 | 41823  | 21.67 | 99.94 |
| chr2 | 2347649 | 2388553 | 40905  | 0.19 | C_unshiu_00494 | 142291 | 183205 | 40915  | 21.2  | 99.94 |

|      |         |         |        |      |                |        |        |        |       |       |
|------|---------|---------|--------|------|----------------|--------|--------|--------|-------|-------|
| chr2 | 2390503 | 2393745 | 3243   | 0.02 | C_unshiu_00494 | 185708 | 188950 | 3243   | 1.68  | 100   |
| chr2 | 2405604 | 2417215 | 11612  | 0.05 | C_unshiu_01007 | 48112  | 59738  | 11627  | 11.07 | 99.52 |
| chr2 | 2418761 | 2420087 | 1327   | 0.01 | C_unshiu_02999 | 1      | 1327   | 1327   | 10.24 | 100   |
| chr2 | 2420636 | 2425683 | 5048   | 0.02 | C_unshiu_00161 | 58372  | 63419  | 5048   | 1.36  | 99.03 |
| chr2 | 2427217 | 2461915 | 34699  | 0.16 | C_unshiu_00398 | 210450 | 175751 | 34700  | 15.53 | 99.94 |
| chr2 | 2463971 | 2502189 | 38219  | 0.18 | C_unshiu_00398 | 173358 | 135099 | 38260  | 17.13 | 99.87 |
| chr2 | 2502558 | 2533502 | 30945  | 0.15 | C_unshiu_00398 | 134236 | 103348 | 30889  | 13.83 | 99.76 |
| chr2 | 2533496 | 2534821 | 1326   | 0.01 | C_unshiu_00648 | 145267 | 143942 | 1326   | 0.84  | 100   |
| chr2 | 2534822 | 2574343 | 39522  | 0.19 | C_unshiu_00398 | 101612 | 62101  | 39512  | 17.69 | 99.92 |
| chr2 | 2574920 | 2579166 | 4247   | 0.02 | C_unshiu_00398 | 57128  | 52882  | 4247   | 1.9   | 100   |
| chr2 | 2579284 | 2581361 | 2078   | 0.01 | C_unshiu_00398 | 52519  | 50443  | 2077   | 0.93  | 99.81 |
| chr2 | 2581490 | 2585159 | 3670   | 0.02 | C_unshiu_00398 | 50264  | 46595  | 3670   | 1.64  | 99.95 |
| chr2 | 2585153 | 2587722 | 2570   | 0.01 | C_unshiu_00597 | 158416 | 160985 | 2570   | 1.53  | 100   |
| chr2 | 2587728 | 2588867 | 1140   | 0.01 | C_unshiu_00398 | 31549  | 32689  | 1141   | 0.51  | 99.91 |
| chr2 | 2588856 | 2591085 | 2230   | 0.01 | C_unshiu_01108 | 46089  | 48318  | 2230   | 2.34  | 99.96 |
| chr2 | 2594721 | 2706625 | 111905 | 0.52 | C_unshiu_00336 | 8335   | 120116 | 111782 | 44.68 | 99.79 |
| chr2 | 2706712 | 2719197 | 12486  | 0.06 | C_unshiu_00336 | 120081 | 132567 | 12487  | 4.99  | 99.94 |
| chr2 | 2719216 | 2736356 | 17141  | 0.08 | C_unshiu_00336 | 133227 | 150367 | 17141  | 6.85  | 99.93 |
| chr2 | 2735959 | 2741047 | 5089   | 0.02 | C_unshiu_00336 | 150236 | 155325 | 5090   | 2.03  | 99.84 |
| chr2 | 2741302 | 2749720 | 8419   | 0.04 | C_unshiu_00336 | 156061 | 164479 | 8419   | 3.37  | 99.98 |
| chr2 | 2751176 | 2769857 | 18682  | 0.09 | C_unshiu_00336 | 166176 | 184889 | 18714  | 7.48  | 99.35 |
| chr2 | 2769897 | 2811060 | 41164  | 0.19 | C_unshiu_00336 | 184788 | 225901 | 41114  | 16.43 | 99.58 |
| chr2 | 2827728 | 2829790 | 2063   | 0.01 | C_unshiu_00319 | 236731 | 238791 | 2061   | 0.8   | 99.71 |
| chr2 | 2829791 | 2832585 | 2795   | 0.01 | C_unshiu_00713 | 98664  | 101458 | 2795   | 1.97  | 100   |
| chr2 | 2832580 | 2837781 | 5202   | 0.02 | C_unshiu_01607 | 55376  | 50177  | 5200   | 9.09  | 99.9  |
| chr2 | 2846655 | 2851067 | 4413   | 0.02 | C_unshiu_00319 | 252125 | 256540 | 4416   | 1.72  | 98.98 |
| chr2 | 2846837 | 2856013 | 9177   | 0.04 | C_unshiu_01607 | 42352  | 33154  | 9199   | 16.09 | 98.43 |
| chr2 | 2851375 | 2861540 | 10166  | 0.05 | C_unshiu_02802 | 17863  | 7702   | 10162  | 56.89 | 98.67 |
| chr2 | 2885116 | 2890265 | 5150   | 0.02 | C_unshiu_00059 | 456642 | 451489 | 5154   | 0.88  | 98.12 |
| chr2 | 2897463 | 2911686 | 14224  | 0.07 | C_unshiu_00059 | 444720 | 430441 | 14280  | 2.43  | 98.25 |
| chr2 | 2916652 | 2917965 | 1314   | 0.01 | C_unshiu_01389 | 9453   | 10765  | 1313   | 1.85  | 99.09 |
| chr2 | 2919433 | 2920847 | 1415   | 0.01 | C_unshiu_01814 | 1298   | 2715   | 1418   | 2.96  | 99.08 |
| chr2 | 2920859 | 2942828 | 21970  | 0.1  | C_unshiu_01814 | 11046  | 32971  | 21926  | 45.7  | 98.66 |
| chr2 | 2943153 | 2947591 | 4439   | 0.02 | C_unshiu_01814 | 33296  | 37734  | 4439   | 9.25  | 99.8  |
| chr2 | 2949385 | 2956732 | 7348   | 0.03 | C_unshiu_01814 | 39129  | 46381  | 7253   | 15.12 | 98.08 |
| chr2 | 2957152 | 2969717 | 12566  | 0.06 | C_unshiu_02233 | 3753   | 16340  | 12588  | 39.19 | 98.93 |
| chr2 | 2969988 | 2971887 | 1900   | 0.01 | C_unshiu_00454 | 111142 | 109242 | 1901   | 0.92  | 98.84 |
| chr2 | 2972140 | 2977132 | 4993   | 0.02 | C_unshiu_02233 | 18638  | 23631  | 4994   | 15.55 | 99.48 |
| chr2 | 2973980 | 2997172 | 23193  | 0.11 | C_unshiu_00454 | 107469 | 84205  | 23265  | 11.25 | 98.95 |
| chr2 | 2999595 | 3006488 | 6894   | 0.03 | C_unshiu_00454 | 84097  | 77202  | 6896   | 3.33  | 99.57 |
| chr2 | 3007193 | 3015678 | 8486   | 0.04 | C_unshiu_00454 | 75340  | 66856  | 8485   | 4.1   | 98.78 |
| chr2 | 3016225 | 3035852 | 19628  | 0.09 | C_unshiu_00454 | 66852  | 47258  | 19595  | 9.47  | 98.53 |
| chr2 | 3037239 | 3038459 | 1221   | 0.01 | C_unshiu_00454 | 46142  | 44920  | 1223   | 0.59  | 99.35 |
| chr2 | 3038488 | 3045763 | 7276   | 0.03 | C_unshiu_00454 | 44621  | 37327  | 7295   | 3.53  | 99.08 |
| chr2 | 3045857 | 3055725 | 9869   | 0.05 | C_unshiu_00454 | 37195  | 27316  | 9880   | 4.78  | 98.81 |
| chr2 | 3060215 | 3061446 | 1232   | 0.01 | C_unshiu_00308 | 169868 | 171099 | 1232   | 0.47  | 100   |
| chr2 | 3064537 | 3075876 | 11340  | 0.05 | C_unshiu_00454 | 22865  | 11452  | 11414  | 5.52  | 98.35 |
| chr2 | 3078820 | 3080939 | 2120   | 0.01 | C_unshiu_00454 | 6923   | 4802   | 2122   | 1.03  | 99.91 |
| chr2 | 3086254 | 3087755 | 1502   | 0.01 | C_unshiu_00050 | 51778  | 53279  | 1502   | 0.25  | 100   |
| chr2 | 3087755 | 3105482 | 17728  | 0.08 | C_unshiu_00046 | 2114   | 19863  | 17750  | 2.79  | 99.27 |
| chr2 | 3112780 | 3116152 | 3373   | 0.02 | C_unshiu_00046 | 24226  | 27594  | 3369   | 0.53  | 99.29 |
| chr2 | 3116387 | 3128385 | 11999  | 0.06 | C_unshiu_00046 | 28475  | 40503  | 12029  | 1.89  | 98.85 |
| chr2 | 3155889 | 3170912 | 15024  | 0.07 | C_unshiu_00046 | 58420  | 73458  | 15039  | 2.36  | 98.85 |
| chr2 | 3171772 | 3177027 | 5256   | 0.02 | C_unshiu_00046 | 74034  | 79301  | 5268   | 0.83  | 99.45 |
| chr2 | 3178469 | 3181496 | 3028   | 0.01 | C_unshiu_00046 | 81256  | 84305  | 3050   | 0.48  | 98.89 |
| chr2 | 3203368 | 3214317 | 10950  | 0.05 | C_unshiu_00046 | 114585 | 125528 | 10944  | 1.72  | 99.22 |
| chr2 | 3214371 | 3232169 | 17799  | 0.08 | C_unshiu_00046 | 125891 | 143689 | 17799  | 2.8   | 99.99 |
| chr2 | 3232878 | 3288387 | 55510  | 0.26 | C_unshiu_00189 | 72562  | 128070 | 55509  | 16.11 | 99.82 |
| chr2 | 3295657 | 3359371 | 63715  | 0.3  | C_unshiu_00189 | 130729 | 194552 | 63824  | 18.53 | 99.73 |
| chr2 | 3369420 | 3389786 | 20367  | 0.1  | C_unshiu_00189 | 193155 | 213603 | 20449  | 5.94  | 99.55 |
| chr2 | 3389790 | 3395225 | 5436   | 0.03 | C_unshiu_00189 | 213720 | 219155 | 5436   | 1.58  | 99.96 |
| chr2 | 3395927 | 3427906 | 31980  | 0.15 | C_unshiu_00189 | 222203 | 254185 | 31983  | 9.28  | 99.99 |
| chr2 | 3428251 | 3429812 | 1562   | 0.01 | C_unshiu_00189 | 255004 | 256565 | 1562   | 0.45  | 100   |
| chr2 | 3429830 | 3432104 | 2275   | 0.01 | C_unshiu_00189 | 257170 | 259444 | 2275   | 0.66  | 100   |
| chr2 | 3433431 | 3511695 | 78265  | 0.37 | C_unshiu_00189 | 260748 | 338928 | 78181  | 22.69 | 99.78 |
| chr2 | 3510205 | 3512287 | 2083   | 0.01 | C_unshiu_00067 | 494504 | 496580 | 2077   | 0.39  | 99.62 |
| chr2 | 3512285 | 3522608 | 10324  | 0.05 | C_unshiu_00067 | 494503 | 484177 | 10327  | 1.95  | 99.85 |
| chr2 | 3522338 | 3565325 | 42988  | 0.2  | C_unshiu_00067 | 484330 | 441327 | 43004  | 8.13  | 99.84 |
| chr2 | 3565320 | 3566913 | 1594   | 0.01 | C_unshiu_02087 | 19333  | 20926  | 1594   | 4.3   | 100   |
| chr2 | 3570468 | 3626643 | 56176  | 0.26 | C_unshiu_00067 | 436701 | 380513 | 56189  | 10.63 | 99.98 |
| chr2 | 3606662 | 3646756 | 40095  | 0.19 | C_unshiu_00067 | 400506 | 360394 | 40113  | 7.59  | 99.96 |
| chr2 | 3647326 | 3719537 | 72212  | 0.34 | C_unshiu_00067 | 359430 | 287258 | 72173  | 13.65 | 99.9  |
| chr2 | 3720948 | 3747664 | 26717  | 0.13 | C_unshiu_00067 | 286425 | 259713 | 26713  | 5.05  | 99.93 |
| chr2 | 3727632 | 3770914 | 43283  | 0.2  | C_unshiu_00067 | 279751 | 236457 | 43295  | 8.19  | 99.97 |
| chr2 | 3770896 | 3794029 | 23134  | 0.11 | C_unshiu_00067 | 236365 | 213223 | 23143  | 4.38  | 99.95 |
| chr2 | 3774035 | 3838521 | 64487  | 0.3  | C_unshiu_00067 | 233226 | 168722 | 64505  | 12.2  | 99.95 |
| chr2 | 3818507 | 3871178 | 52672  | 0.25 | C_unshiu_00067 | 188738 | 136033 | 52706  | 9.97  | 99.89 |
| chr2 | 3870510 | 3916294 | 45785  | 0.21 | C_unshiu_00067 | 131969 | 86200  | 45770  | 8.66  | 99.93 |
| chr2 | 3896297 | 3960318 | 64022  | 0.3  | C_unshiu_00067 | 106179 | 42197  | 63983  | 12.1  | 99.87 |

|      |         |         |        |      |                |        |        |        |       |       |
|------|---------|---------|--------|------|----------------|--------|--------|--------|-------|-------|
| chr2 | 3962303 | 3964946 | 2644   | 0.01 | C_unshiu_02892 | 15224  | 12610  | 2615   | 16.39 | 98.49 |
| chr2 | 3966376 | 3968428 | 2053   | 0.01 | C_unshiu_02892 | 10657  | 8599   | 2059   | 12.91 | 99.51 |
| chr2 | 3970354 | 3981523 | 11170  | 0.05 | C_unshiu_00067 | 43545  | 32394  | 11152  | 2.11  | 99.77 |
| chr2 | 3982572 | 3995615 | 13044  | 0.06 | C_unshiu_00067 | 31422  | 18367  | 13056  | 2.47  | 99.31 |
| chr2 | 3995152 | 4011234 | 16083  | 0.08 | C_unshiu_00049 | 611561 | 595466 | 16096  | 2.6   | 98.82 |
| chr2 | 4013186 | 4117532 | 104347 | 0.49 | C_unshiu_00049 | 593518 | 489238 | 104281 | 16.87 | 99.81 |
| chr2 | 4117458 | 4311522 | 194065 | 0.91 | C_unshiu_00049 | 489254 | 295245 | 194010 | 31.39 | 99.9  |
| chr2 | 4312779 | 4373251 | 60473  | 0.28 | C_unshiu_00049 | 293302 | 232883 | 60420  | 9.78  | 99.77 |
| chr2 | 4373934 | 4399020 | 25087  | 0.12 | C_unshiu_00049 | 231678 | 206585 | 25094  | 4.06  | 99.59 |
| chr2 | 4379068 | 4405747 | 26680  | 0.13 | C_unshiu_00049 | 226571 | 199858 | 26714  | 4.32  | 99.81 |
| chr2 | 4405848 | 4447310 | 41463  | 0.19 | C_unshiu_00296 | 258387 | 216912 | 41476  | 15.43 | 99.96 |
| chr2 | 4427325 | 4453551 | 26227  | 0.12 | C_unshiu_00296 | 236911 | 210722 | 26190  | 9.75  | 99.17 |
| chr2 | 4456141 | 4472201 | 16061  | 0.08 | C_unshiu_00296 | 209564 | 193501 | 16064  | 5.98  | 99.98 |
| chr2 | 4474560 | 4481008 | 6449   | 0.03 | C_unshiu_00385 | 17827  | 11378  | 6450   | 2.85  | 99.88 |
| chr2 | 4481002 | 4484626 | 3625   | 0.02 | C_unshiu_00385 | 10704  | 7079   | 3626   | 1.6   | 99.78 |
| chr2 | 4494320 | 4495482 | 1163   | 0.01 | C_unshiu_00636 | 64692  | 63530  | 1163   | 0.73  | 100   |
| chr2 | 4495785 | 4509650 | 13866  | 0.07 | C_unshiu_02350 | 4519   | 18384  | 13866  | 48.88 | 100   |
| chr2 | 4509775 | 4519233 | 9459   | 0.04 | C_unshiu_02350 | 18553  | 28023  | 9471   | 33.39 | 99.5  |
| chr2 | 4521932 | 4523109 | 1178   | 0.01 | C_unshiu_00324 | 24828  | 23651  | 1178   | 0.46  | 100   |
| chr2 | 4523497 | 4529674 | 6178   | 0.03 | C_unshiu_02258 | 21814  | 28018  | 6205   | 19.85 | 98.92 |
| chr2 | 4530028 | 4531641 | 1614   | 0.01 | C_unshiu_01700 | 862    | 2475   | 1614   | 3.07  | 99.19 |
| chr2 | 4530154 | 4532925 | 2772   | 0.01 | C_unshiu_01058 | 86256  | 83500  | 2757   | 2.77  | 98.31 |
| chr2 | 4534108 | 4536859 | 2752   | 0.01 | C_unshiu_01700 | 4729   | 7490   | 2762   | 5.26  | 98.63 |
| chr2 | 4538551 | 4544201 | 5651   | 0.03 | C_unshiu_01058 | 77795  | 72149  | 5647   | 5.68  | 98.9  |
| chr2 | 4557936 | 4578564 | 20629  | 0.1  | C_unshiu_01058 | 56131  | 35389  | 20743  | 20.85 | 98.15 |
| chr2 | 4578565 | 4602432 | 23868  | 0.11 | C_unshiu_01058 | 32340  | 8380   | 23961  | 24.09 | 98.06 |
| chr2 | 4614464 | 4632458 | 17995  | 0.08 | C_unshiu_01353 | 13177  | 31275  | 18099  | 24.5  | 98.37 |
| chr2 | 4637810 | 4657441 | 19632  | 0.09 | C_unshiu_01353 | 35220  | 54869  | 19650  | 26.6  | 98.23 |
| chr2 | 4664344 | 4667819 | 3476   | 0.02 | C_unshiu_01353 | 64808  | 68289  | 3482   | 4.71  | 98.11 |
| chr2 | 4671010 | 4672868 | 1859   | 0.01 | C_unshiu_02106 | 10443  | 12305  | 1863   | 5.13  | 98.82 |
| chr2 | 4672862 | 4674790 | 1929   | 0.01 | C_unshiu_02106 | 12435  | 14378  | 1944   | 5.36  | 98.15 |
| chr2 | 4690773 | 4711598 | 20826  | 0.1  | C_unshiu_02653 | 1      | 20866  | 20866  | 100   | 98.88 |
| chr2 | 4719166 | 4731472 | 12307  | 0.06 | C_unshiu_00325 | 186921 | 174725 | 12197  | 4.79  | 98.14 |
| chr2 | 4745176 | 4747865 | 2690   | 0.01 | C_unshiu_01290 | 56604  | 59293  | 2690   | 3.44  | 100   |
| chr2 | 4757622 | 4760198 | 2577   | 0.01 | C_unshiu_01290 | 69459  | 72037  | 2579   | 3.3   | 99.57 |
| chr2 | 4762074 | 4781810 | 19737  | 0.09 | C_unshiu_01226 | 39090  | 19348  | 19743  | 23.84 | 99.3  |
| chr2 | 4788874 | 4830146 | 41273  | 0.19 | C_unshiu_01485 | 57081  | 15937  | 41145  | 64.23 | 99.22 |
| chr2 | 4835890 | 4837001 | 1112   | 0.01 | C_unshiu_00021 | 111266 | 112378 | 1113   | 0.14  | 99.28 |
| chr2 | 4835890 | 4837001 | 1112   | 0.01 | C_unshiu_00356 | 202487 | 203598 | 1112   | 0.47  | 99.73 |
| chr2 | 4840089 | 4841908 | 1820   | 0.01 | C_unshiu_00500 | 62801  | 60984  | 1818   | 0.95  | 99.45 |
| chr2 | 4854170 | 4856698 | 2529   | 0.01 | C_unshiu_00223 | 296897 | 299425 | 2529   | 0.81  | 100   |
| chr2 | 4866214 | 4867287 | 1074   | 0.01 | C_unshiu_02741 | 7746   | 6673   | 1074   | 5.61  | 100   |
| chr2 | 4867388 | 4869162 | 1775   | 0.01 | C_unshiu_01020 | 81647  | 79873  | 1775   | 1.71  | 99.89 |
| chr2 | 4871849 | 4880601 | 8753   | 0.04 | C_unshiu_02093 | 14161  | 22894  | 8734   | 23.72 | 98.57 |
| chr2 | 4895460 | 4897748 | 2289   | 0.01 | C_unshiu_01028 | 55046  | 52732  | 2315   | 2.24  | 98.4  |
| chr2 | 4897835 | 4914401 | 16567  | 0.08 | C_unshiu_01028 | 52628  | 36096  | 16533  | 16.03 | 98.15 |
| chr2 | 4926605 | 4937597 | 10993  | 0.05 | C_unshiu_01028 | 14529  | 3533   | 10997  | 10.66 | 98.56 |
| chr2 | 4937597 | 4939299 | 1703   | 0.01 | C_unshiu_01028 | 3589   | 1887   | 1703   | 1.65  | 99.3  |
| chr2 | 4941482 | 4950548 | 9067   | 0.04 | C_unshiu_02169 | 1      | 9068   | 9068   | 26.29 | 99.04 |
| chr2 | 4959182 | 4977064 | 17883  | 0.08 | C_unshiu_02169 | 15008  | 32887  | 17880  | 51.85 | 99.59 |
| chr2 | 4985468 | 4990064 | 4597   | 0.02 | C_unshiu_01013 | 401    | 4987   | 4587   | 4.39  | 98.65 |
| chr2 | 4990150 | 4994774 | 4625   | 0.02 | C_unshiu_01013 | 5392   | 10014  | 4623   | 4.42  | 99.78 |
| chr2 | 4994955 | 5017039 | 22085  | 0.1  | C_unshiu_01013 | 10124  | 32216  | 22093  | 21.13 | 98.81 |
| chr2 | 5017127 | 5021718 | 4592   | 0.02 | C_unshiu_01013 | 32661  | 37252  | 4592   | 4.39  | 99.98 |
| chr2 | 5023026 | 5024493 | 1468   | 0.01 | C_unshiu_01013 | 37238  | 38706  | 1469   | 1.4   | 99.05 |
| chr2 | 5025801 | 5027027 | 1227   | 0.01 | C_unshiu_02008 | 25437  | 26663  | 1227   | 3.03  | 99.92 |
| chr2 | 5032165 | 5034152 | 1988   | 0.01 | C_unshiu_01013 | 42503  | 44490  | 1988   | 1.9   | 99.7  |
| chr2 | 5046064 | 5052350 | 6287   | 0.03 | C_unshiu_01013 | 60974  | 67283  | 6310   | 6.03  | 99.05 |
| chr2 | 5113097 | 5119979 | 6883   | 0.03 | C_unshiu_01690 | 52947  | 46062  | 6886   | 13.01 | 99.9  |
| chr2 | 5124991 | 5143507 | 18517  | 0.09 | C_unshiu_01690 | 41443  | 22900  | 18544  | 35.02 | 99.27 |
| chr2 | 5147487 | 5153353 | 5867   | 0.03 | C_unshiu_00909 | 8611   | 14479  | 5869   | 5.06  | 98.64 |
| chr2 | 5154463 | 5156190 | 1728   | 0.01 | C_unshiu_00909 | 15967  | 17694  | 1728   | 1.49  | 99.94 |
| chr2 | 5159722 | 5163102 | 3381   | 0.02 | C_unshiu_00909 | 21518  | 24939  | 3422   | 2.95  | 98.04 |
| chr2 | 5163445 | 5196264 | 32820  | 0.15 | C_unshiu_00909 | 25713  | 58530  | 32818  | 28.27 | 98.68 |
| chr2 | 5197431 | 5199188 | 1758   | 0.01 | C_unshiu_00909 | 59939  | 61696  | 1758   | 1.51  | 99.72 |
| chr2 | 5215134 | 5221217 | 6084   | 0.03 | C_unshiu_01300 | 77400  | 71320  | 6081   | 7.85  | 99.39 |
| chr2 | 5221313 | 5228236 | 6924   | 0.03 | C_unshiu_01300 | 70796  | 63863  | 6934   | 8.96  | 98.92 |
| chr2 | 5232216 | 5259212 | 26997  | 0.13 | C_unshiu_01300 | 48238  | 21202  | 27037  | 34.92 | 98.61 |
| chr2 | 5260317 | 5261868 | 1552   | 0.01 | C_unshiu_01300 | 21183  | 19633  | 1551   | 2     | 99.36 |
| chr2 | 5262847 | 5269553 | 6707   | 0.03 | C_unshiu_01300 | 19198  | 12467  | 6732   | 8.7   | 98.69 |
| chr2 | 5272262 | 5282711 | 10450  | 0.05 | C_unshiu_01300 | 10450  | 1      | 10450  | 13.5  | 100   |
| chr2 | 5304512 | 5316039 | 11528  | 0.05 | C_unshiu_00389 | 67030  | 78461  | 11432  | 5.07  | 98.11 |
| chr2 | 5316918 | 5330631 | 13714  | 0.06 | C_unshiu_02283 | 25793  | 12038  | 13756  | 45.46 | 99.69 |
| chr2 | 5331093 | 5339556 | 8464   | 0.04 | C_unshiu_02283 | 11593  | 3120   | 8474   | 28    | 99.05 |
| chr2 | 5342686 | 5374612 | 31927  | 0.15 | C_unshiu_01177 | 12208  | 44010  | 31803  | 36.25 | 99.37 |
| chr2 | 5375105 | 5384782 | 9678   | 0.05 | C_unshiu_01177 | 44895  | 54546  | 9652   | 11    | 99.05 |
| chr2 | 5395491 | 5399530 | 4040   | 0.02 | C_unshiu_01177 | 62953  | 67010  | 4058   | 4.63  | 98.74 |
| chr2 | 5395491 | 5399530 | 4040   | 0.02 | C_unshiu_01271 | 49225  | 45162  | 4064   | 5.11  | 98.45 |
| chr2 | 5399565 | 5412714 | 13150  | 0.06 | C_unshiu_01271 | 44906  | 31777  | 13130  | 16.51 | 98.34 |

|      |         |         |        |      |                |        |        |        |       |       |
|------|---------|---------|--------|------|----------------|--------|--------|--------|-------|-------|
| chr2 | 5413740 | 5418761 | 5022   | 0.02 | C_unshiu_01271 | 31300  | 26270  | 5031   | 6.33  | 99.34 |
| chr2 | 5441004 | 5452686 | 11683  | 0.05 | C_unshiu_01271 | 16771  | 5070   | 11702  | 14.72 | 98.1  |
| chr2 | 5463211 | 5464515 | 1305   | 0.01 | C_unshiu_01052 | 62077  | 60770  | 1308   | 1.31  | 99.31 |
| chr2 | 5466929 | 5479419 | 12491  | 0.06 | C_unshiu_01052 | 58240  | 45721  | 12520  | 12.55 | 99.07 |
| chr2 | 5497985 | 5504834 | 6850   | 0.03 | C_unshiu_01052 | 26925  | 20054  | 6872   | 6.89  | 98.49 |
| chr2 | 5506965 | 5510767 | 3803   | 0.02 | C_unshiu_01052 | 13552  | 9749   | 3804   | 3.81  | 99.79 |
| chr2 | 5525617 | 5527528 | 1912   | 0.01 | C_unshiu_00265 | 197560 | 195650 | 1911   | 0.67  | 99.06 |
| chr2 | 5531353 | 5543567 | 12215  | 0.06 | C_unshiu_00265 | 191495 | 179264 | 12232  | 4.3   | 98.5  |
| chr2 | 5543728 | 5552433 | 8706   | 0.04 | C_unshiu_00579 | 11121  | 19820  | 8700   | 5.07  | 98.87 |
| chr2 | 5553508 | 5562464 | 8957   | 0.04 | C_unshiu_00265 | 170717 | 161739 | 8979   | 3.15  | 98.61 |
| chr2 | 5567185 | 5600443 | 33259  | 0.16 | C_unshiu_01720 | 33252  | 1      | 33252  | 64.15 | 99.14 |
| chr2 | 5593132 | 5605411 | 12280  | 0.06 | C_unshiu_00265 | 160662 | 148367 | 12296  | 4.32  | 98.02 |
| chr2 | 5606243 | 5618741 | 12499  | 0.06 | C_unshiu_00265 | 148369 | 135801 | 12569  | 4.41  | 98.39 |
| chr2 | 5621893 | 5634072 | 12180  | 0.06 | C_unshiu_00265 | 135809 | 123679 | 12131  | 4.26  | 98.3  |
| chr2 | 5634064 | 5635711 | 1648   | 0.01 | C_unshiu_00265 | 123498 | 121844 | 1655   | 0.58  | 98.73 |
| chr2 | 5635706 | 5665409 | 29704  | 0.14 | C_unshiu_00265 | 121374 | 91652  | 29723  | 10.44 | 98.43 |
| chr2 | 5678383 | 5682993 | 4611   | 0.02 | C_unshiu_03087 | 7      | 4622   | 4616   | 46.82 | 98.55 |
| chr2 | 5689167 | 5713185 | 24019  | 0.11 | C_unshiu_01552 | 19854  | 43888  | 24035  | 39.76 | 98.1  |
| chr2 | 5719387 | 5720785 | 1399   | 0.01 | C_unshiu_01552 | 45839  | 47237  | 1399   | 2.31  | 98.93 |
| chr2 | 5721658 | 5722817 | 1160   | 0.01 | C_unshiu_01552 | 43966  | 45123  | 1158   | 1.92  | 98.97 |
| chr2 | 5725036 | 5726635 | 1600   | 0.01 | C_unshiu_01552 | 47198  | 48789  | 1592   | 2.63  | 98.44 |
| chr2 | 5735631 | 5736954 | 1324   | 0.01 | C_unshiu_01552 | 55179  | 56510  | 1332   | 2.2   | 99.32 |
| chr2 | 5742601 | 5744620 | 2020   | 0.01 | C_unshiu_00529 | 162607 | 160588 | 2020   | 1.1   | 100   |
| chr2 | 5745780 | 5747235 | 1456   | 0.01 | C_unshiu_00593 | 153039 | 151581 | 1459   | 0.86  | 99.59 |
| chr2 | 5747804 | 5752734 | 4931   | 0.02 | C_unshiu_00593 | 151283 | 146396 | 4888   | 2.9   | 98.66 |
| chr2 | 5753144 | 5756542 | 3399   | 0.02 | C_unshiu_00593 | 146038 | 142696 | 3343   | 1.98  | 98.09 |
| chr2 | 5765923 | 5774763 | 8841   | 0.04 | C_unshiu_00593 | 117395 | 108466 | 8930   | 5.29  | 98.4  |
| chr2 | 5774753 | 5780911 | 6159   | 0.03 | C_unshiu_00593 | 107874 | 101719 | 6156   | 3.65  | 98.98 |
| chr2 | 5781445 | 5788517 | 7073   | 0.03 | C_unshiu_00593 | 100816 | 93727  | 7090   | 4.2   | 99.31 |
| chr2 | 5808472 | 5829774 | 21303  | 0.1  | C_unshiu_00026 | 165416 | 186748 | 21333  | 2.83  | 99.45 |
| chr2 | 5832531 | 5855069 | 22539  | 0.11 | C_unshiu_00026 | 190208 | 212807 | 22600  | 3     | 98.56 |
| chr2 | 5855088 | 5865161 | 10074  | 0.05 | C_unshiu_00026 | 213622 | 223719 | 10098  | 1.34  | 98.91 |
| chr2 | 5873105 | 5881353 | 8249   | 0.04 | C_unshiu_00026 | 228683 | 236919 | 8237   | 1.09  | 98.33 |
| chr2 | 5887431 | 5889319 | 1889   | 0.01 | C_unshiu_00026 | 242000 | 243890 | 1891   | 0.25  | 99.63 |
| chr2 | 5892599 | 5895123 | 2525   | 0.01 | C_unshiu_01192 | 5963   | 8497   | 2535   | 2.94  | 98.9  |
| chr2 | 5912878 | 5922075 | 9198   | 0.04 | C_unshiu_01192 | 23632  | 32827  | 9196   | 10.66 | 98.28 |
| chr2 | 5922339 | 5924675 | 2337   | 0.01 | C_unshiu_00511 | 98770  | 101106 | 2337   | 1.24  | 100   |
| chr2 | 5922345 | 5928266 | 5922   | 0.03 | C_unshiu_01356 | 55465  | 61385  | 5921   | 8.03  | 99.93 |
| chr2 | 5928245 | 5929605 | 1361   | 0.01 | C_unshiu_00621 | 60875  | 59518  | 1358   | 0.83  | 98.38 |
| chr2 | 5935003 | 5937527 | 2525   | 0.01 | C_unshiu_01192 | 39696  | 42225  | 2530   | 2.93  | 98.34 |
| chr2 | 5938624 | 5943101 | 4478   | 0.02 | C_unshiu_01192 | 43859  | 48370  | 4512   | 5.23  | 98.91 |
| chr2 | 5949069 | 5950503 | 1435   | 0.01 | C_unshiu_01192 | 54382  | 55818  | 1437   | 1.67  | 98.96 |
| chr2 | 5952309 | 5963587 | 11279  | 0.05 | C_unshiu_01192 | 58182  | 69516  | 11335  | 13.14 | 98.22 |
| chr2 | 5963682 | 5965558 | 1877   | 0.01 | C_unshiu_01192 | 69774  | 71649  | 1876   | 2.17  | 98.51 |
| chr2 | 5975843 | 5987444 | 11602  | 0.05 | C_unshiu_02017 | 40053  | 28509  | 11545  | 28.82 | 98.33 |
| chr2 | 5987445 | 5988853 | 1409   | 0.01 | C_unshiu_02017 | 28268  | 26860  | 1409   | 3.52  | 100   |
| chr2 | 5997796 | 6018634 | 20839  | 0.1  | C_unshiu_01611 | 35122  | 55945  | 20824  | 36.48 | 99.81 |
| chr2 | 6025876 | 6069618 | 43743  | 0.21 | C_unshiu_00172 | 7021   | 50864  | 43844  | 11.96 | 99.19 |
| chr2 | 6069866 | 6076508 | 6643   | 0.03 | C_unshiu_00172 | 51212  | 57838  | 6627   | 1.81  | 99.16 |
| chr2 | 6075892 | 6122228 | 46337  | 0.22 | C_unshiu_00172 | 57860  | 104196 | 46337  | 12.64 | 99.99 |
| chr2 | 6122229 | 6263618 | 141390 | 0.66 | C_unshiu_00172 | 104573 | 245997 | 141425 | 38.59 | 99.89 |
| chr2 | 6263611 | 6323827 | 60217  | 0.28 | C_unshiu_00172 | 246026 | 306240 | 60215  | 16.43 | 99.98 |
| chr2 | 6333255 | 6337835 | 4581   | 0.02 | C_unshiu_00172 | 322732 | 327320 | 4589   | 1.25  | 98.38 |
| chr2 | 6338994 | 6340694 | 1701   | 0.01 | C_unshiu_00172 | 327596 | 329300 | 1705   | 0.47  | 99.71 |
| chr2 | 6341053 | 6371496 | 30444  | 0.14 | C_unshiu_00172 | 331585 | 362027 | 30443  | 8.31  | 99.99 |
| chr2 | 6372950 | 6374135 | 1186   | 0.01 | C_unshiu_00172 | 364278 | 365462 | 1185   | 0.32  | 98.23 |
| chr2 | 6378952 | 6380721 | 1770   | 0.01 | C_unshiu_00990 | 25807  | 24038  | 1770   | 1.65  | 99.72 |
| chr2 | 6382304 | 6400407 | 18104  | 0.08 | C_unshiu_00990 | 21928  | 3866   | 18063  | 16.8  | 99.43 |
| chr2 | 6400812 | 6402444 | 1633   | 0.01 | C_unshiu_00958 | 1705   | 3341   | 1637   | 1.48  | 98.66 |
| chr2 | 6402479 | 6404175 | 1697   | 0.01 | C_unshiu_00990 | 1696   | 1      | 1696   | 1.58  | 99.12 |
| chr2 | 6413501 | 6416577 | 3077   | 0.01 | C_unshiu_00958 | 6347   | 9423   | 3077   | 2.78  | 99.9  |
| chr2 | 6416991 | 6418645 | 1655   | 0.01 | C_unshiu_00958 | 10223  | 11877  | 1655   | 1.49  | 100   |
| chr2 | 6433598 | 6436029 | 2432   | 0.01 | C_unshiu_00958 | 11638  | 14071  | 2434   | 2.2   | 98.69 |
| chr2 | 6436872 | 6440045 | 3174   | 0.01 | C_unshiu_00958 | 16084  | 19262  | 3179   | 2.87  | 99.5  |
| chr2 | 6458013 | 6462722 | 4710   | 0.02 | C_unshiu_00958 | 35346  | 40060  | 4715   | 4.25  | 98.94 |
| chr2 | 6464647 | 6466519 | 1873   | 0.01 | C_unshiu_00958 | 40329  | 42201  | 1873   | 1.69  | 98.03 |
| chr2 | 6477170 | 6482009 | 4840   | 0.02 | C_unshiu_00958 | 54108  | 58946  | 4839   | 4.37  | 98.93 |
| chr2 | 6482782 | 6484667 | 1886   | 0.01 | C_unshiu_00958 | 59042  | 60928  | 1887   | 1.7   | 98.26 |
| chr2 | 6491747 | 6512757 | 21011  | 0.1  | C_unshiu_00958 | 65322  | 86331  | 21010  | 18.96 | 98.94 |
| chr2 | 6516811 | 6521747 | 4937   | 0.02 | C_unshiu_01761 | 27171  | 32100  | 4930   | 9.88  | 98.52 |
| chr2 | 6523311 | 6526161 | 2851   | 0.01 | C_unshiu_00877 | 109946 | 112796 | 2851   | 2.39  | 100   |
| chr2 | 6526416 | 6531515 | 5100   | 0.02 | C_unshiu_00877 | 113118 | 118239 | 5122   | 4.29  | 98.83 |
| chr2 | 6535063 | 6536321 | 1259   | 0.01 | C_unshiu_00877 | 118242 | 119499 | 1258   | 1.05  | 99.6  |
| chr2 | 6537458 | 6543793 | 6336   | 0.03 | C_unshiu_02190 | 6597   | 12933  | 6337   | 18.89 | 99.51 |
| chr2 | 6543915 | 6546097 | 2183   | 0.01 | C_unshiu_02190 | 13107  | 15289  | 2183   | 6.51  | 100   |
| chr2 | 6547322 | 6554556 | 7235   | 0.03 | C_unshiu_02190 | 17061  | 24295  | 7235   | 21.57 | 100   |
| chr2 | 6559611 | 6561288 | 1678   | 0.01 | C_unshiu_02190 | 28991  | 30669  | 1679   | 5.01  | 99.52 |
| chr2 | 6568185 | 6572000 | 3816   | 0.02 | C_unshiu_00352 | 24457  | 28300  | 3844   | 1.6   | 98.23 |
| chr2 | 6576218 | 6581850 | 5633   | 0.03 | C_unshiu_00352 | 31850  | 37482  | 5633   | 2.35  | 100   |

|      |         |         |        |      |                |        |        |        |       |       |
|------|---------|---------|--------|------|----------------|--------|--------|--------|-------|-------|
| chr2 | 6582355 | 6589757 | 7403   | 0.03 | C_unshiu_02873 | 2864   | 10252  | 7389   | 45.12 | 99.45 |
| chr2 | 6595051 | 6596208 | 1158   | 0.01 | C_unshiu_02444 | 5903   | 4748   | 1156   | 4.39  | 98.36 |
| chr2 | 6598962 | 6608881 | 9920   | 0.05 | C_unshiu_00081 | 430594 | 420685 | 9910   | 2.07  | 99.4  |
| chr2 | 6610377 | 6640394 | 30018  | 0.14 | C_unshiu_00081 | 420181 | 390151 | 30031  | 6.28  | 99.87 |
| chr2 | 6620369 | 6697524 | 77156  | 0.36 | C_unshiu_00081 | 410174 | 333002 | 77173  | 16.14 | 99.9  |
| chr2 | 6677528 | 6716215 | 238688 | 1.12 | C_unshiu_00081 | 352980 | 114432 | 238549 | 49.89 | 99.88 |
| chr2 | 6916224 | 6931421 | 15198  | 0.07 | C_unshiu_00081 | 113967 | 98770  | 15198  | 3.18  | 99.99 |
| chr2 | 6921417 | 7030322 | 108906 | 0.51 | C_unshiu_00081 | 108774 | 6      | 108769 | 22.75 | 99.68 |
| chr2 | 7036955 | 7066020 | 29066  | 0.14 | C_unshiu_01435 | 57136  | 28074  | 29063  | 42.68 | 99.87 |
| chr2 | 7068325 | 7083206 | 14882  | 0.07 | C_unshiu_01435 | 25250  | 10360  | 14891  | 21.87 | 99.92 |
| chr2 | 7085663 | 7087947 | 2285   | 0.01 | C_unshiu_01435 | 2587   | 296    | 2292   | 3.37  | 98.91 |
| chr2 | 7095177 | 7158015 | 62839  | 0.29 | C_unshiu_00283 | 48602  | 111308 | 62707  | 22.76 | 99.32 |
| chr2 | 7159328 | 7194572 | 35245  | 0.17 | C_unshiu_00283 | 112232 | 147482 | 35251  | 12.8  | 99.95 |
| chr2 | 7194263 | 7248409 | 54147  | 0.25 | C_unshiu_00283 | 147362 | 201519 | 54158  | 19.66 | 99.87 |
| chr2 | 7248745 | 7290761 | 42017  | 0.2  | C_unshiu_00283 | 208194 | 250183 | 41990  | 15.24 | 99.76 |
| chr2 | 7290753 | 7307390 | 16638  | 0.08 | C_unshiu_00283 | 250903 | 267513 | 16611  | 6.03  | 99.78 |
| chr2 | 7312124 | 7362933 | 50810  | 0.24 | C_unshiu_01181 | 86865  | 36293  | 50573  | 57.99 | 99.41 |
| chr2 | 7362926 | 7388223 | 25298  | 0.12 | C_unshiu_01181 | 36239  | 10941  | 25299  | 29.01 | 99.94 |
| chr2 | 7393892 | 7395841 | 1950   | 0.01 | C_unshiu_00178 | 128168 | 130117 | 1950   | 0.54  | 100   |
| chr2 | 7399357 | 7405026 | 5670   | 0.03 | C_unshiu_00136 | 5311   | 10980  | 5670   | 1.4   | 99.98 |
| chr2 | 7407263 | 7428806 | 21544  | 0.1  | C_unshiu_00136 | 20573  | 42123  | 21551  | 5.31  | 99.71 |
| chr2 | 7408840 | 7467495 | 58656  | 0.28 | C_unshiu_00136 | 22143  | 80794  | 58652  | 14.44 | 99.79 |
| chr2 | 7467513 | 7499240 | 31728  | 0.15 | C_unshiu_00136 | 81034  | 112762 | 31729  | 7.81  | 99.99 |
| chr2 | 7499010 | 7569356 | 70347  | 0.33 | C_unshiu_00136 | 117428 | 187781 | 70354  | 17.32 | 99.92 |
| chr2 | 7568799 | 7658087 | 89289  | 0.42 | C_unshiu_00136 | 187804 | 277027 | 89224  | 21.97 | 99.59 |
| chr2 | 7638090 | 7698616 | 60527  | 0.28 | C_unshiu_00136 | 257043 | 317540 | 60498  | 14.9  | 99.72 |
| chr2 | 7678610 | 7702631 | 24022  | 0.11 | C_unshiu_00136 | 297542 | 321555 | 24014  | 5.91  | 99.97 |
| chr2 | 7707232 | 7746223 | 38992  | 0.18 | C_unshiu_00136 | 325595 | 364676 | 39082  | 9.62  | 99.68 |
| chr2 | 7746350 | 7748369 | 2020   | 0.01 | C_unshiu_00136 | 365025 | 367043 | 2019   | 0.5   | 99.95 |
| chr2 | 7748561 | 7787305 | 38745  | 0.18 | C_unshiu_00136 | 367350 | 406102 | 38753  | 9.54  | 99.94 |
| chr2 | 7796974 | 7798115 | 1142   | 0.01 | C_unshiu_01169 | 10896  | 12043  | 1148   | 1.3   | 98.43 |
| chr2 | 7799607 | 7802674 | 3068   | 0.01 | C_unshiu_00472 | 199513 | 196461 | 3053   | 1.52  | 99.41 |
| chr2 | 7802695 | 7805423 | 2729   | 0.01 | C_unshiu_00472 | 195533 | 192805 | 2729   | 1.36  | 100   |
| chr2 | 7806536 | 7832597 | 26062  | 0.12 | C_unshiu_00472 | 191576 | 165512 | 26065  | 12.97 | 99.9  |
| chr2 | 7833433 | 7855308 | 21876  | 0.1  | C_unshiu_00472 | 164243 | 142368 | 21876  | 10.89 | 100   |
| chr2 | 7855328 | 7915123 | 59796  | 0.28 | C_unshiu_00472 | 141004 | 81243  | 59762  | 29.74 | 99.81 |
| chr2 | 7915224 | 7920083 | 4860   | 0.02 | C_unshiu_00523 | 42380  | 37516  | 4865   | 2.63  | 99.51 |
| chr2 | 7930665 | 7939548 | 8884   | 0.04 | C_unshiu_00575 | 51650  | 42765  | 8886   | 5.16  | 99.28 |
| chr2 | 7939579 | 7942081 | 2503   | 0.01 | C_unshiu_00575 | 42115  | 39605  | 2511   | 1.46  | 98.65 |
| chr2 | 7950496 | 7952863 | 2368   | 0.01 | C_unshiu_00552 | 93842  | 96198  | 2357   | 1.32  | 99.54 |
| chr2 | 7952965 | 7961729 | 8765   | 0.04 | C_unshiu_00552 | 96581  | 105361 | 8781   | 4.92  | 98.07 |
| chr2 | 7960199 | 7961930 | 1732   | 0.01 | C_unshiu_02973 | 6104   | 4382   | 1723   | 12.56 | 98.45 |
| chr2 | 7963149 | 7967377 | 4229   | 0.02 | C_unshiu_00552 | 91206  | 86969  | 4238   | 2.38  | 99.27 |
| chr2 | 7968207 | 7978663 | 10457  | 0.05 | C_unshiu_00552 | 110291 | 120750 | 10460  | 5.86  | 98.25 |
| chr2 | 7975580 | 7988382 | 12803  | 0.06 | C_unshiu_00552 | 78228  | 65396  | 12833  | 7.19  | 98.26 |
| chr2 | 7989825 | 8000987 | 11163  | 0.05 | C_unshiu_00552 | 130670 | 141851 | 11182  | 6.27  | 99.52 |
| chr2 | 8045621 | 8053746 | 8126   | 0.04 | C_unshiu_01445 | 20757  | 28883  | 8127   | 12.1  | 98.83 |
| chr2 | 8055786 | 8059757 | 3972   | 0.02 | C_unshiu_01445 | 30967  | 34953  | 3987   | 5.94  | 98.95 |
| chr2 | 8059889 | 8064425 | 4537   | 0.02 | C_unshiu_01445 | 34953  | 39489  | 4537   | 6.76  | 99.49 |
| chr2 | 8063929 | 8068041 | 4113   | 0.02 | C_unshiu_00334 | 22218  | 18106  | 4113   | 1.64  | 99.95 |
| chr2 | 8068367 | 8070894 | 2528   | 0.01 | C_unshiu_00334 | 17520  | 14995  | 2526   | 1.01  | 99.84 |
| chr2 | 8089521 | 8094562 | 5042   | 0.02 | C_unshiu_00975 | 73324  | 78367  | 5044   | 4.63  | 98.34 |
| chr2 | 8096536 | 8106530 | 9995   | 0.05 | C_unshiu_00975 | 81487  | 91506  | 10020  | 9.2   | 98.45 |
| chr2 | 8116081 | 8123241 | 7161   | 0.03 | C_unshiu_00975 | 97997  | 105197 | 7201   | 6.61  | 98.92 |
| chr2 | 8123233 | 8125080 | 1848   | 0.01 | C_unshiu_00975 | 105614 | 107465 | 1852   | 1.7   | 98.7  |
| chr2 | 8124388 | 8126160 | 1773   | 0.01 | C_unshiu_01995 | 1      | 1771   | 1771   | 4.34  | 98.48 |
| chr2 | 8181831 | 8186707 | 4877   | 0.02 | C_unshiu_00924 | 1655   | 6561   | 4907   | 4.29  | 98.47 |
| chr2 | 8186921 | 8198358 | 11438  | 0.05 | C_unshiu_00924 | 7569   | 18980  | 11412  | 9.97  | 98.74 |
| chr2 | 8199319 | 8221672 | 22354  | 0.1  | C_unshiu_00924 | 22160  | 44529  | 22370  | 19.55 | 99.5  |
| chr2 | 8222441 | 8225180 | 2740   | 0.01 | C_unshiu_00924 | 45912  | 48648  | 2737   | 2.39  | 99.34 |
| chr2 | 8225184 | 8230643 | 5460   | 0.03 | C_unshiu_00924 | 49444  | 54887  | 5444   | 4.76  | 98.57 |
| chr2 | 8237035 | 8247545 | 10511  | 0.05 | C_unshiu_00924 | 57947  | 68398  | 10452  | 9.13  | 98.44 |
| chr2 | 8263697 | 8266129 | 2433   | 0.01 | C_unshiu_00924 | 77755  | 80187  | 2433   | 2.13  | 100   |
| chr2 | 8292071 | 8293370 | 1300   | 0.01 | C_unshiu_01480 | 58624  | 57327  | 1298   | 2.01  | 98.47 |
| chr2 | 8293391 | 8294409 | 1019   | 0    | C_unshiu_00924 | 113624 | 112601 | 1024   | 0.89  | 99.51 |
| chr2 | 8294427 | 8295807 | 1381   | 0.01 | C_unshiu_00924 | 112238 | 110858 | 1381   | 1.21  | 99.93 |
| chr2 | 8296058 | 8301355 | 5298   | 0.02 | C_unshiu_01480 | 51117  | 45821  | 5297   | 8.22  | 99.72 |
| chr2 | 8301951 | 8304353 | 2403   | 0.01 | C_unshiu_01480 | 44747  | 42345  | 2403   | 3.73  | 99.79 |
| chr2 | 8304373 | 8310422 | 6050   | 0.03 | C_unshiu_01480 | 40487  | 34435  | 6053   | 9.39  | 99.82 |
| chr2 | 8314941 | 8322227 | 7287   | 0.03 | C_unshiu_01480 | 27871  | 20525  | 7347   | 11.4  | 98.86 |
| chr2 | 8326747 | 8328699 | 1953   | 0.01 | C_unshiu_00112 | 191437 | 193392 | 1956   | 0.45  | 98.52 |
| chr2 | 8331588 | 8339091 | 7504   | 0.04 | C_unshiu_03037 | 7504   | 1      | 7504   | 63.22 | 99.83 |
| chr2 | 8349803 | 8394401 | 44599  | 0.21 | C_unshiu_00310 | 7303   | 51904  | 44602  | 17.13 | 99.98 |
| chr2 | 8396262 | 8399740 | 3479   | 0.02 | C_unshiu_00310 | 51887  | 55365  | 3479   | 1.34  | 99.97 |
| chr2 | 8401289 | 8403490 | 2202   | 0.01 | C_unshiu_00310 | 57472  | 59673  | 2202   | 0.85  | 100   |
| chr2 | 8406747 | 8417765 | 11019  | 0.05 | C_unshiu_00915 | 86853  | 75756  | 11098  | 9.62  | 98.16 |
| chr2 | 8426187 | 8436072 | 9886   | 0.05 | C_unshiu_00915 | 68876  | 58994  | 9883   | 8.56  | 99.31 |
| chr2 | 8442631 | 8457987 | 15357  | 0.07 | C_unshiu_01530 | 7607   | 22939  | 15333  | 24.89 | 99.13 |
| chr2 | 8460045 | 8468907 | 8863   | 0.04 | C_unshiu_01530 | 25828  | 34690  | 8863   | 14.39 | 100   |

|      |         |         |        |      |                |        |        |        |       |       |
|------|---------|---------|--------|------|----------------|--------|--------|--------|-------|-------|
| chr2 | 8511237 | 8521292 | 10056  | 0.05 | C_unshiu_03078 | 10081  | 1      | 10081  | 100   | 99.16 |
| chr2 | 8536533 | 8548444 | 11912  | 0.06 | C_unshiu_00102 | 445788 | 433884 | 11905  | 2.62  | 99.45 |
| chr2 | 8548438 | 8550294 | 1857   | 0.01 | C_unshiu_00102 | 433420 | 431558 | 1863   | 0.41  | 99.14 |
| chr2 | 8557810 | 8559335 | 1526   | 0.01 | C_unshiu_00102 | 454389 | 452865 | 1525   | 0.34  | 98.17 |
| chr2 | 8560390 | 8563469 | 3080   | 0.01 | C_unshiu_00102 | 416565 | 413486 | 3080   | 0.68  | 99.81 |
| chr2 | 8565940 | 8567612 | 1673   | 0.01 | C_unshiu_00321 | 183169 | 184841 | 1673   | 0.65  | 100   |
| chr2 | 8569096 | 8570640 | 1545   | 0.01 | C_unshiu_01038 | 101076 | 102620 | 1545   | 1.51  | 99.68 |
| chr2 | 8570607 | 8616260 | 45654  | 0.21 | C_unshiu_01038 | 101083 | 55517  | 45567  | 44.4  | 99.61 |
| chr2 | 8615804 | 8630126 | 14323  | 0.07 | C_unshiu_01038 | 54421  | 40099  | 14323  | 13.96 | 99.99 |
| chr2 | 8632459 | 8664202 | 31744  | 0.15 | C_unshiu_01038 | 36721  | 4992   | 31730  | 30.92 | 99.9  |
| chr2 | 8664830 | 8666761 | 1932   | 0.01 | C_unshiu_00526 | 113280 | 111348 | 1933   | 1.05  | 99.59 |
| chr2 | 8666860 | 8669027 | 2168   | 0.01 | C_unshiu_00526 | 110919 | 108776 | 2144   | 1.16  | 98.34 |
| chr2 | 8669020 | 8673618 | 4599   | 0.02 | C_unshiu_00526 | 108451 | 103850 | 4602   | 2.49  | 99.46 |
| chr2 | 8673726 | 8679555 | 5830   | 0.03 | C_unshiu_00526 | 103852 | 98050  | 5803   | 3.15  | 98.6  |
| chr2 | 8680984 | 8691520 | 10537  | 0.05 | C_unshiu_00526 | 96766  | 86250  | 10517  | 5.7   | 99.64 |
| chr2 | 8702882 | 8708546 | 5665   | 0.03 | C_unshiu_00350 | 210509 | 216179 | 5671   | 2.35  | 99.51 |
| chr2 | 8709057 | 8712963 | 3907   | 0.02 | C_unshiu_00350 | 217061 | 220980 | 3920   | 1.62  | 99.49 |
| chr2 | 8712174 | 8718008 | 5835   | 0.03 | C_unshiu_01950 | 31625  | 37466  | 5842   | 13.67 | 99.73 |
| chr2 | 8722438 | 8726850 | 4413   | 0.02 | C_unshiu_00841 | 123643 | 119240 | 4404   | 3.56  | 99.71 |
| chr2 | 8729068 | 8731294 | 2227   | 0.01 | C_unshiu_00841 | 119162 | 116934 | 2229   | 1.8   | 99.87 |
| chr2 | 8731363 | 8743924 | 12562  | 0.06 | C_unshiu_00841 | 116638 | 104156 | 12483  | 10.1  | 98.2  |
| chr2 | 8744947 | 8761904 | 16958  | 0.08 | C_unshiu_00350 | 224503 | 241394 | 16892  | 6.99  | 98.89 |
| chr2 | 8765607 | 8768744 | 3138   | 0.01 | C_unshiu_00841 | 101751 | 98615  | 3137   | 2.54  | 99.46 |
| chr2 | 8770903 | 8778268 | 7366   | 0.03 | C_unshiu_00841 | 96123  | 88714  | 7410   | 5.99  | 98.11 |
| chr2 | 8796325 | 8808423 | 12099  | 0.06 | C_unshiu_00841 | 71696  | 59545  | 12152  | 9.83  | 98.62 |
| chr2 | 8808415 | 8826351 | 17937  | 0.08 | C_unshiu_00841 | 58854  | 40947  | 17908  | 14.48 | 98.14 |
| chr2 | 8826566 | 8836493 | 9928   | 0.05 | C_unshiu_00841 | 40199  | 30264  | 9936   | 8.04  | 99.47 |
| chr2 | 8838275 | 8842133 | 3859   | 0.02 | C_unshiu_00841 | 27795  | 23937  | 3859   | 3.12  | 100   |
| chr2 | 8842370 | 8849614 | 7245   | 0.03 | C_unshiu_00841 | 23208  | 15871  | 7338   | 5.93  | 98.04 |
| chr2 | 8863820 | 8865321 | 1502   | 0.01 | C_unshiu_00841 | 15124  | 13623  | 1502   | 1.21  | 99.93 |
| chr2 | 8894877 | 8896196 | 1320   | 0.01 | C_unshiu_02630 | 19417  | 20736  | 1320   | 6.15  | 99.39 |
| chr2 | 8900347 | 8903873 | 3527   | 0.02 | C_unshiu_01853 | 46401  | 42919  | 3483   | 7.51  | 98.19 |
| chr2 | 8908023 | 8910086 | 2064   | 0.01 | C_unshiu_00323 | 109872 | 107809 | 2064   | 0.81  | 100   |
| chr2 | 8910080 | 8924950 | 14871  | 0.07 | C_unshiu_01853 | 36571  | 21710  | 14862  | 32.03 | 98.95 |
| chr2 | 8924961 | 8926892 | 1932   | 0.01 | C_unshiu_01853 | 22070  | 20139  | 1932   | 4.16  | 99.59 |
| chr2 | 8935619 | 8939042 | 3424   | 0.02 | C_unshiu_00904 | 12733  | 16156  | 3424   | 2.94  | 100   |
| chr2 | 8949407 | 8950743 | 1337   | 0.01 | C_unshiu_00410 | 133417 | 132072 | 1346   | 0.61  | 98.96 |
| chr2 | 8954857 | 8955997 | 1141   | 0.01 | C_unshiu_00410 | 128663 | 127523 | 1141   | 0.52  | 99.82 |
| chr2 | 8958692 | 8959957 | 1266   | 0.01 | C_unshiu_00410 | 124765 | 123502 | 1264   | 0.57  | 98.5  |
| chr2 | 8979535 | 8981168 | 1634   | 0.01 | C_unshiu_02630 | 11269  | 12902  | 1634   | 7.62  | 99.69 |
| chr2 | 8981277 | 8986463 | 5187   | 0.02 | C_unshiu_02630 | 13028  | 18270  | 5243   | 24.45 | 98.23 |
| chr2 | 8987802 | 8993492 | 5691   | 0.03 | C_unshiu_02472 | 14346  | 20003  | 5658   | 22.22 | 98.74 |
| chr2 | 9008339 | 9010242 | 1904   | 0.01 | C_unshiu_03048 | 6227   | 4324   | 1904   | 16.6  | 100   |
| chr2 | 9011619 | 9016394 | 4776   | 0.02 | C_unshiu_00625 | 59630  | 54867  | 4764   | 2.94  | 98.33 |
| chr2 | 9023208 | 9025402 | 2195   | 0.01 | C_unshiu_01853 | 6810   | 4612   | 2199   | 4.74  | 99.68 |
| chr2 | 9026142 | 9029507 | 3366   | 0.02 | C_unshiu_01853 | 3366   | 1      | 3366   | 7.25  | 99.91 |
| chr2 | 9039766 | 9040868 | 1103   | 0.01 | C_unshiu_01141 | 29384  | 28282  | 1103   | 1.2   | 100   |
| chr2 | 9046974 | 9048777 | 1804   | 0.01 | C_unshiu_00745 | 129437 | 127634 | 1804   | 1.32  | 100   |
| chr2 | 9048791 | 9135282 | 86492  | 0.41 | C_unshiu_00745 | 127282 | 40789  | 86494  | 63.2  | 99.97 |
| chr2 | 9135531 | 9149827 | 14297  | 0.07 | C_unshiu_00745 | 40793  | 26500  | 14294  | 10.44 | 99.79 |
| chr2 | 9156317 | 9161587 | 5271   | 0.02 | C_unshiu_00745 | 20195  | 14925  | 5271   | 3.85  | 99.91 |
| chr2 | 9161593 | 9172012 | 10420  | 0.05 | C_unshiu_00745 | 14574  | 4223   | 10352  | 7.56  | 98.84 |
| chr2 | 9172719 | 9256421 | 83703  | 0.39 | C_unshiu_00064 | 1      | 83690  | 83690  | 14.96 | 99.86 |
| chr2 | 9256464 | 9346674 | 90211  | 0.42 | C_unshiu_00064 | 84162  | 174397 | 90236  | 16.13 | 99.97 |
| chr2 | 9348929 | 9410520 | 61592  | 0.29 | C_unshiu_00064 | 177302 | 238911 | 61610  | 11.01 | 99.73 |
| chr2 | 9391774 | 9426137 | 34364  | 0.16 | C_unshiu_00064 | 220151 | 254483 | 34333  | 6.14  | 99.78 |
| chr2 | 9412132 | 9447254 | 35123  | 0.16 | C_unshiu_00064 | 240491 | 275576 | 35086  | 6.27  | 99.89 |
| chr2 | 9427266 | 9493857 | 66592  | 0.31 | C_unshiu_00064 | 255612 | 322091 | 66480  | 11.88 | 99.58 |
| chr2 | 9473857 | 9594427 | 120571 | 0.57 | C_unshiu_00064 | 302103 | 422715 | 120613 | 21.55 | 99.93 |
| chr2 | 9574476 | 9651392 | 76917  | 0.36 | C_unshiu_00064 | 402738 | 479657 | 76920  | 13.75 | 99.93 |
| chr2 | 9655048 | 9661076 | 6029   | 0.03 | C_unshiu_00994 | 65120  | 59045  | 6076   | 5.68  | 98.1  |
| chr2 | 9662484 | 9664414 | 1931   | 0.01 | C_unshiu_00064 | 485212 | 487142 | 1931   | 0.35  | 99.9  |
| chr2 | 9673024 | 9679055 | 6032   | 0.03 | C_unshiu_00065 | 540622 | 534592 | 6031   | 1.09  | 99.06 |
| chr2 | 9679142 | 9682328 | 3187   | 0.01 | C_unshiu_00065 | 534497 | 531311 | 3187   | 0.58  | 99.47 |
| chr2 | 9689232 | 9700138 | 10907  | 0.05 | C_unshiu_00356 | 133089 | 122141 | 10949  | 4.61  | 98.45 |
| chr2 | 9703974 | 9706708 | 2735   | 0.01 | C_unshiu_02248 | 3910   | 1176   | 2735   | 8.59  | 99.78 |
| chr2 | 9706824 | 9710289 | 3466   | 0.02 | C_unshiu_02248 | 7205   | 10684  | 3480   | 10.93 | 98.42 |
| chr2 | 9710705 | 9719825 | 9121   | 0.04 | C_unshiu_00356 | 112038 | 102917 | 9122   | 3.84  | 99.74 |
| chr2 | 9718078 | 9721879 | 3802   | 0.02 | C_unshiu_02248 | 14066  | 17870  | 3805   | 11.95 | 99.19 |
| chr2 | 9722456 | 9726439 | 3984   | 0.02 | C_unshiu_02248 | 18082  | 22065  | 3984   | 12.51 | 98.35 |
| chr2 | 9739832 | 9757808 | 17977  | 0.08 | C_unshiu_00356 | 88922  | 70879  | 18044  | 7.6   | 98.6  |
| chr2 | 9768652 | 9770266 | 1615   | 0.01 | C_unshiu_00231 | 123554 | 125168 | 1615   | 0.53  | 100   |
| chr2 | 9770260 | 9774155 | 3896   | 0.02 | C_unshiu_00356 | 50068  | 46157  | 3912   | 1.65  | 98.49 |
| chr2 | 9774513 | 9780301 | 5789   | 0.03 | C_unshiu_00356 | 44218  | 38425  | 5794   | 2.44  | 98.47 |
| chr2 | 9788010 | 9789852 | 1843   | 0.01 | C_unshiu_00356 | 31591  | 29747  | 1845   | 0.78  | 99.3  |
| chr2 | 9791113 | 9792838 | 1726   | 0.01 | C_unshiu_00356 | 28152  | 26426  | 1727   | 0.73  | 99.94 |
| chr2 | 9867830 | 9869997 | 2168   | 0.01 | C_unshiu_01252 | 33580  | 35752  | 2173   | 2.69  | 98.44 |
| chr2 | 9875939 | 9877565 | 1627   | 0.01 | C_unshiu_01252 | 36689  | 38313  | 1625   | 2.01  | 99.39 |
| chr2 | 9892442 | 9896689 | 4248   | 0.02 | C_unshiu_01252 | 38609  | 42865  | 4257   | 5.27  | 98.22 |

|      |          |          |        |      |                |        |        |        |       |       |
|------|----------|----------|--------|------|----------------|--------|--------|--------|-------|-------|
| chr2 | 9925925  | 9934683  | 8759   | 0.04 | C_unshiu_01252 | 58013  | 66808  | 8796   | 10.89 | 98.75 |
| chr2 | 9947398  | 9950393  | 2996   | 0.01 | C_unshiu_01252 | 77745  | 80742  | 2998   | 3.71  | 99.4  |
| chr2 | 9947413  | 9956436  | 9024   | 0.04 | C_unshiu_00070 | 40946  | 31929  | 9018   | 1.73  | 99.06 |
| chr2 | 9971748  | 9972798  | 1051   | 0    | C_unshiu_00460 | 97716  | 96668  | 1049   | 0.51  | 98.57 |
| chr2 | 9980318  | 9982342  | 2025   | 0.01 | C_unshiu_00044 | 220030 | 218005 | 2026   | 0.32  | 99.8  |
| chr2 | 9982589  | 9986694  | 4106   | 0.02 | C_unshiu_00994 | 76536  | 80638  | 4103   | 3.84  | 99.85 |
| chr2 | 9988209  | 10026347 | 38139  | 0.18 | C_unshiu_00965 | 97853  | 59714  | 38140  | 34.62 | 99.99 |
| chr2 | 10026341 | 10086009 | 59669  | 0.28 | C_unshiu_00965 | 59684  | 21     | 59664  | 54.16 | 99.7  |
| chr2 | 10120124 | 10121256 | 1133   | 0.01 | C_unshiu_00029 | 214234 | 213105 | 1130   | 0.16  | 99.56 |
| chr2 | 10125643 | 10153100 | 27458  | 0.13 | C_unshiu_00022 | 1      | 27446  | 27446  | 3.51  | 99.96 |
| chr2 | 10133109 | 10231390 | 98282  | 0.46 | C_unshiu_00022 | 7467   | 105726 | 98260  | 12.57 | 99.96 |
| chr2 | 10211384 | 10236826 | 25443  | 0.12 | C_unshiu_00022 | 85738  | 111162 | 25425  | 3.25  | 99.92 |
| chr2 | 10249887 | 10257986 | 8100   | 0.04 | C_unshiu_00022 | 127133 | 135214 | 8082   | 1.03  | 99.1  |
| chr2 | 10263487 | 10266865 | 3379   | 0.02 | C_unshiu_00022 | 141853 | 145231 | 3379   | 0.43  | 99.82 |
| chr2 | 10268646 | 10271264 | 2619   | 0.01 | C_unshiu_00022 | 124893 | 127511 | 2619   | 0.33  | 100   |
| chr2 | 10272425 | 10297218 | 24794  | 0.12 | C_unshiu_00022 | 147806 | 172558 | 24753  | 3.17  | 99.23 |
| chr2 | 10302298 | 10316301 | 14004  | 0.07 | C_unshiu_00022 | 177157 | 191177 | 14021  | 1.79  | 99.84 |
| chr2 | 10322526 | 10324741 | 2216   | 0.01 | C_unshiu_00116 | 188515 | 186299 | 2217   | 0.51  | 99.19 |
| chr2 | 10323519 | 10357194 | 33676  | 0.16 | C_unshiu_00022 | 202268 | 235909 | 33642  | 4.3   | 99.59 |
| chr2 | 10357058 | 10360351 | 3294   | 0.02 | C_unshiu_00022 | 235905 | 239198 | 3294   | 0.42  | 100   |
| chr2 | 10360910 | 10388178 | 27269  | 0.13 | C_unshiu_00022 | 239754 | 267016 | 27263  | 3.49  | 99.92 |
| chr2 | 10388660 | 10390029 | 1370   | 0.01 | C_unshiu_00419 | 176759 | 175390 | 1370   | 0.62  | 100   |
| chr2 | 10390395 | 10406335 | 15941  | 0.07 | C_unshiu_00022 | 267799 | 283789 | 15991  | 2.04  | 99.67 |
| chr2 | 10411979 | 10414302 | 2324   | 0.01 | C_unshiu_00022 | 288324 | 290647 | 2324   | 0.3   | 100   |
| chr2 | 10415854 | 10472743 | 56890  | 0.27 | C_unshiu_00022 | 292605 | 349473 | 56869  | 7.27  | 99.87 |
| chr2 | 10472767 | 10515017 | 42251  | 0.2  | C_unshiu_00022 | 349716 | 391986 | 42271  | 5.41  | 99.61 |
| chr2 | 10515084 | 10546314 | 31231  | 0.15 | C_unshiu_00022 | 392272 | 423505 | 31234  | 3.99  | 99.99 |
| chr2 | 10545874 | 10609432 | 63559  | 0.3  | C_unshiu_00022 | 423947 | 487506 | 63560  | 8.13  | 99.99 |
| chr2 | 10609643 | 10659667 | 50025  | 0.23 | C_unshiu_00022 | 488112 | 538142 | 50031  | 6.4   | 99.95 |
| chr2 | 10661566 | 10686436 | 24871  | 0.12 | C_unshiu_00022 | 540735 | 565623 | 24889  | 3.18  | 99.93 |
| chr2 | 10686454 | 10710907 | 24454  | 0.11 | C_unshiu_00022 | 565500 | 589953 | 24454  | 3.13  | 100   |
| chr2 | 10712721 | 10721467 | 8747   | 0.04 | C_unshiu_00022 | 592285 | 601095 | 8811   | 1.13  | 99.06 |
| chr2 | 10722560 | 10725349 | 2790   | 0.01 | C_unshiu_00022 | 602278 | 605069 | 2792   | 0.36  | 99.71 |
| chr2 | 10724325 | 10787789 | 63465  | 0.3  | C_unshiu_00035 | 15642  | 79055  | 63414  | 9.23  | 99.84 |
| chr2 | 10767791 | 10813425 | 45635  | 0.21 | C_unshiu_00035 | 59069  | 104691 | 45623  | 6.64  | 99.97 |
| chr2 | 10813521 | 10901603 | 88083  | 0.41 | C_unshiu_00035 | 105106 | 193197 | 88092  | 12.83 | 99.97 |
| chr2 | 10901540 | 10969397 | 67858  | 0.32 | C_unshiu_00035 | 193201 | 261083 | 67883  | 9.88  | 99.94 |
| chr2 | 10949421 | 11052734 | 103314 | 0.48 | C_unshiu_00035 | 241088 | 344426 | 103339 | 15.05 | 99.95 |
| chr2 | 11052731 | 11054087 | 1357   | 0.01 | C_unshiu_00035 | 344786 | 346130 | 1345   | 0.2   | 98.16 |
| chr2 | 11058588 | 11147428 | 88841  | 0.42 | C_unshiu_00073 | 102482 | 191215 | 88734  | 17.18 | 98.89 |
| chr2 | 11127435 | 11191911 | 64477  | 0.3  | C_unshiu_00073 | 171239 | 235699 | 64461  | 12.48 | 99.97 |
| chr2 | 11192186 | 11307409 | 115224 | 0.54 | C_unshiu_00073 | 236190 | 351401 | 115212 | 22.3  | 99.87 |
| chr2 | 11310802 | 11333057 | 22256  | 0.1  | C_unshiu_00073 | 354278 | 376536 | 22259  | 4.31  | 99.8  |
| chr2 | 11333368 | 11417168 | 83801  | 0.39 | C_unshiu_00073 | 376538 | 460330 | 83793  | 16.22 | 99.88 |
| chr2 | 11397187 | 11466537 | 69351  | 0.33 | C_unshiu_00073 | 440335 | 509710 | 69376  | 13.43 | 99.87 |
| chr2 | 11472212 | 11473340 | 1129   | 0.01 | C_unshiu_00185 | 334729 | 333601 | 1129   | 0.33  | 100   |
| chr2 | 11480261 | 11487078 | 6818   | 0.03 | C_unshiu_00185 | 325894 | 319076 | 6819   | 1.97  | 99.52 |
| chr2 | 11487127 | 11518298 | 31172  | 0.15 | C_unshiu_00185 | 319168 | 287947 | 31222  | 9.01  | 99.84 |
| chr2 | 11520119 | 11567643 | 47525  | 0.22 | C_unshiu_00185 | 285404 | 237871 | 47534  | 13.71 | 99.81 |
| chr2 | 11567659 | 11579643 | 11985  | 0.06 | C_unshiu_00185 | 236851 | 224861 | 11991  | 3.46  | 99.95 |
| chr2 | 11580906 | 11583611 | 2706   | 0.01 | C_unshiu_00185 | 221967 | 219260 | 2708   | 0.78  | 99.93 |
| chr2 | 11583642 | 11597572 | 13931  | 0.07 | C_unshiu_00185 | 220062 | 206127 | 13936  | 4.02  | 98.55 |
| chr2 | 11602983 | 11616999 | 14017  | 0.07 | C_unshiu_00185 | 197890 | 183874 | 14017  | 4.04  | 99.99 |
| chr2 | 11617217 | 11667019 | 49803  | 0.23 | C_unshiu_00185 | 183654 | 133858 | 49797  | 14.36 | 99.97 |
| chr2 | 11647027 | 11680837 | 33811  | 0.16 | C_unshiu_00185 | 153844 | 120040 | 33805  | 9.75  | 99.94 |
| chr2 | 11682010 | 11698635 | 16626  | 0.08 | C_unshiu_00185 | 118246 | 101654 | 16593  | 4.79  | 99.69 |
| chr2 | 11700045 | 11720603 | 20559  | 0.1  | C_unshiu_00185 | 94734  | 74154  | 20581  | 5.94  | 99.7  |
| chr2 | 11720619 | 11721705 | 1087   | 0.01 | C_unshiu_00418 | 76736  | 75645  | 1092   | 0.5   | 99.18 |
| chr2 | 11728329 | 11735507 | 7179   | 0.03 | C_unshiu_00418 | 66708  | 59501  | 7208   | 3.28  | 98.96 |
| chr2 | 11737690 | 11739008 | 1319   | 0.01 | C_unshiu_00224 | 307223 | 305905 | 1319   | 0.42  | 99.55 |
| chr2 | 11745214 | 11756451 | 11238  | 0.05 | C_unshiu_00224 | 299836 | 288651 | 11186  | 3.58  | 98.92 |
| chr2 | 11774403 | 11782174 | 7772   | 0.04 | C_unshiu_00224 | 268699 | 260897 | 7803   | 2.5   | 98.34 |
| chr2 | 11782178 | 11791019 | 8842   | 0.04 | C_unshiu_00224 | 260750 | 251904 | 8847   | 2.83  | 99.56 |
| chr2 | 11791054 | 11803070 | 12017  | 0.06 | C_unshiu_00224 | 251910 | 239882 | 12029  | 3.85  | 99.56 |
| chr2 | 11803061 | 11806027 | 2967   | 0.01 | C_unshiu_00224 | 239268 | 236309 | 2960   | 0.95  | 98.96 |
| chr2 | 11806214 | 11828831 | 22618  | 0.11 | C_unshiu_00224 | 235587 | 212940 | 22648  | 7.24  | 99    |
| chr2 | 11829004 | 11844258 | 15255  | 0.07 | C_unshiu_00224 | 212770 | 197470 | 15301  | 4.89  | 99.48 |
| chr2 | 11844332 | 11854162 | 9831   | 0.05 | C_unshiu_00224 | 196966 | 187104 | 9863   | 3.15  | 98.4  |
| chr2 | 11854157 | 11865375 | 11219  | 0.05 | C_unshiu_00224 | 187041 | 175894 | 11148  | 3.56  | 98.02 |
| chr2 | 11865952 | 11883508 | 17557  | 0.08 | C_unshiu_00224 | 175404 | 157890 | 17515  | 5.6   | 98.41 |
| chr2 | 11884302 | 11900855 | 16554  | 0.08 | C_unshiu_00224 | 157312 | 140763 | 16550  | 5.29  | 99.61 |
| chr2 | 11901130 | 11904606 | 3477   | 0.02 | C_unshiu_00224 | 140169 | 136689 | 3481   | 1.11  | 99.31 |
| chr2 | 11904809 | 11919616 | 14808  | 0.07 | C_unshiu_00224 | 136697 | 121887 | 14811  | 4.74  | 98.4  |
| chr2 | 11919617 | 11924845 | 5229   | 0.02 | C_unshiu_00224 | 121350 | 116114 | 5237   | 1.67  | 99.22 |
| chr2 | 11934969 | 11937808 | 2840   | 0.01 | C_unshiu_00224 | 104912 | 102093 | 2820   | 0.9   | 98.56 |
| chr2 | 11937901 | 11940292 | 2392   | 0.01 | C_unshiu_00913 | 2906   | 519    | 2388   | 2.06  | 99.75 |
| chr2 | 11941751 | 11953149 | 11399  | 0.05 | C_unshiu_00224 | 97686  | 86259  | 11428  | 3.65  | 99.42 |
| chr2 | 11953044 | 11977650 | 24607  | 0.12 | C_unshiu_00224 | 86472  | 61875  | 24598  | 7.87  | 99.3  |
| chr2 | 12001640 | 12004349 | 2710   | 0.01 | C_unshiu_02398 | 19565  | 22274  | 2710   | 9.91  | 99.78 |

|      |          |          |        |      |                |        |        |        |       |       |
|------|----------|----------|--------|------|----------------|--------|--------|--------|-------|-------|
| chr2 | 12005942 | 12007780 | 1839   | 0.01 | C_unshiu_02398 | 24667  | 26502  | 1836   | 6.72  | 98.75 |
| chr2 | 12027561 | 12036592 | 9032   | 0.04 | C_unshiu_01558 | 33304  | 42265  | 8962   | 14.94 | 98.26 |
| chr2 | 12038065 | 12039197 | 1133   | 0.01 | C_unshiu_01558 | 44222  | 45354  | 1133   | 1.89  | 100   |
| chr2 | 12042127 | 12050967 | 8841   | 0.04 | C_unshiu_02189 | 31342  | 22438  | 8905   | 26.5  | 98.43 |
| chr2 | 12068553 | 12079286 | 10734  | 0.05 | C_unshiu_02189 | 14605  | 3833   | 10773  | 32.06 | 98.25 |
| chr2 | 12089744 | 12108319 | 18576  | 0.09 | C_unshiu_00759 | 124439 | 105843 | 18597  | 13.77 | 99.2  |
| chr2 | 12113735 | 12136813 | 23079  | 0.11 | C_unshiu_00759 | 96312  | 73227  | 23086  | 17.09 | 98.44 |
| chr2 | 12142943 | 12152300 | 9358   | 0.04 | C_unshiu_00759 | 71391  | 62014  | 9378   | 6.94  | 98.53 |
| chr2 | 12153245 | 12156069 | 2825   | 0.01 | C_unshiu_00759 | 58946  | 56120  | 2827   | 2.09  | 99.47 |
| chr2 | 12188218 | 12197939 | 9722   | 0.05 | C_unshiu_00759 | 24505  | 14781  | 9725   | 7.2   | 98.35 |
| chr2 | 12205457 | 12206961 | 1505   | 0.01 | C_unshiu_00759 | 8968   | 7463   | 1506   | 1.12  | 99.2  |
| chr2 | 12212574 | 12213760 | 1187   | 0.01 | C_unshiu_00759 | 1187   | 1      | 1187   | 0.88  | 100   |
| chr2 | 12224642 | 12240410 | 15769  | 0.07 | C_unshiu_00612 | 1      | 15724  | 15724  | 9.55  | 99.64 |
| chr2 | 12246160 | 12248956 | 2797   | 0.01 | C_unshiu_01572 | 37646  | 34850  | 2797   | 4.74  | 100   |
| chr2 | 12250529 | 12263349 | 12821  | 0.06 | C_unshiu_00612 | 26371  | 39234  | 12864  | 7.81  | 98.39 |
| chr2 | 12263482 | 12274934 | 11453  | 0.05 | C_unshiu_02566 | 16039  | 4583   | 11457  | 50.03 | 99.88 |
| chr2 | 12277128 | 12280841 | 3714   | 0.02 | C_unshiu_02566 | 3713   | 1      | 3713   | 16.21 | 99.49 |
| chr2 | 12317704 | 12321774 | 4071   | 0.02 | C_unshiu_00612 | 91648  | 95709  | 4062   | 2.47  | 98.04 |
| chr2 | 12324069 | 12328559 | 4491   | 0.02 | C_unshiu_00612 | 96716  | 101209 | 4494   | 2.73  | 99.47 |
| chr2 | 12335458 | 12340774 | 5317   | 0.02 | C_unshiu_00612 | 116739 | 122065 | 5327   | 3.24  | 98.37 |
| chr2 | 12362881 | 12364579 | 1699   | 0.01 | C_unshiu_02344 | 8104   | 9802   | 1699   | 5.97  | 98.24 |
| chr2 | 12384603 | 12387145 | 2543   | 0.01 | C_unshiu_02152 | 34988  | 32442  | 2547   | 7.28  | 99.69 |
| chr2 | 12388022 | 12400327 | 12306  | 0.06 | C_unshiu_02152 | 31491  | 19125  | 12367  | 35.35 | 98.54 |
| chr2 | 12434557 | 12446696 | 12140  | 0.06 | C_unshiu_00501 | 33064  | 45272  | 12209  | 6.38  | 98.52 |
| chr2 | 12448230 | 12450089 | 1860   | 0.01 | C_unshiu_00501 | 47385  | 49254  | 1870   | 0.98  | 98.88 |
| chr2 | 12453951 | 12456916 | 2966   | 0.01 | C_unshiu_00501 | 53651  | 56614  | 2964   | 1.55  | 98.15 |
| chr2 | 12456810 | 12475180 | 18371  | 0.09 | C_unshiu_00501 | 56611  | 74997  | 18387  | 9.61  | 98.75 |
| chr2 | 12477933 | 12481318 | 3386   | 0.02 | C_unshiu_00501 | 78425  | 81810  | 3386   | 1.77  | 99.32 |
| chr2 | 12483187 | 12484962 | 1776   | 0.01 | C_unshiu_00501 | 84319  | 86078  | 1760   | 0.92  | 98.09 |
| chr2 | 12485592 | 12502843 | 17252  | 0.08 | C_unshiu_01660 | 34504  | 17351  | 17154  | 31.34 | 98.21 |
| chr2 | 12507114 | 12508673 | 1560   | 0.01 | C_unshiu_00501 | 106687 | 108246 | 1560   | 0.82  | 100   |
| chr2 | 12510086 | 12511941 | 1856   | 0.01 | C_unshiu_00501 | 109862 | 111717 | 1856   | 0.97  | 100   |
| chr2 | 12513726 | 12532861 | 19136  | 0.09 | C_unshiu_00501 | 113801 | 132911 | 19111  | 9.99  | 99.53 |
| chr2 | 12529660 | 12542209 | 12550  | 0.06 | C_unshiu_01660 | 15614  | 3015   | 12600  | 23.02 | 98.14 |
| chr2 | 12574090 | 12581414 | 7325   | 0.03 | C_unshiu_00501 | 183997 | 191273 | 7277   | 3.8   | 98.42 |
| chr2 | 12592140 | 12596408 | 4269   | 0.02 | C_unshiu_01261 | 43851  | 48130  | 4280   | 5.34  | 99.35 |
| chr2 | 12602631 | 12606830 | 4200   | 0.02 | C_unshiu_00016 | 83800  | 79619  | 4182   | 0.48  | 98.22 |
| chr2 | 12620162 | 12655745 | 35584  | 0.17 | C_unshiu_00723 | 97618  | 133216 | 35599  | 25.38 | 99.57 |
| chr2 | 12656430 | 12658303 | 1874   | 0.01 | C_unshiu_01007 | 32582  | 34455  | 1874   | 1.78  | 100   |
| chr2 | 12658296 | 12661712 | 3417   | 0.02 | C_unshiu_00723 | 136885 | 140277 | 3393   | 2.42  | 98.42 |
| chr2 | 12663707 | 12686099 | 22393  | 0.11 | C_unshiu_02276 | 25136  | 2757   | 22380  | 73.31 | 99.9  |
| chr2 | 12686104 | 12688851 | 2748   | 0.01 | C_unshiu_02276 | 4      | 2756   | 2753   | 9.02  | 98.23 |
| chr2 | 12688299 | 12733964 | 45666  | 0.21 | C_unshiu_00125 | 93104  | 138764 | 45661  | 10.92 | 99.9  |
| chr2 | 12733433 | 12766109 | 32677  | 0.15 | C_unshiu_00125 | 138325 | 171029 | 32705  | 7.82  | 99.77 |
| chr2 | 12765834 | 12822641 | 56808  | 0.27 | C_unshiu_00125 | 171048 | 227830 | 56783  | 13.57 | 99.7  |
| chr2 | 12823106 | 12869028 | 45923  | 0.22 | C_unshiu_00125 | 228361 | 274251 | 45891  | 10.97 | 99.68 |
| chr2 | 12868675 | 12883221 | 14547  | 0.07 | C_unshiu_00125 | 274073 | 288619 | 14547  | 3.48  | 99.97 |
| chr2 | 12884760 | 12935007 | 50248  | 0.24 | C_unshiu_00125 | 291093 | 341318 | 50226  | 12.01 | 99.66 |
| chr2 | 12941683 | 12944303 | 2621   | 0.01 | C_unshiu_01638 | 47206  | 49826  | 2621   | 4.71  | 99.24 |
| chr2 | 12947361 | 12990140 | 42780  | 0.2  | C_unshiu_00125 | 348668 | 391454 | 42787  | 10.23 | 99.98 |
| chr2 | 12970132 | 13017008 | 46877  | 0.22 | C_unshiu_00125 | 371440 | 418322 | 46883  | 11.21 | 99.98 |
| chr2 | 13014900 | 13026753 | 11854  | 0.06 | C_unshiu_00143 | 398914 | 387060 | 11855  | 2.97  | 99.98 |
| chr2 | 13030891 | 13046780 | 15890  | 0.07 | C_unshiu_00143 | 383989 | 368096 | 15894  | 3.98  | 99.88 |
| chr2 | 13047557 | 13099323 | 51767  | 0.24 | C_unshiu_00143 | 366849 | 315125 | 51725  | 12.97 | 99.85 |
| chr2 | 13098909 | 13149924 | 51016  | 0.24 | C_unshiu_00143 | 315420 | 264461 | 50960  | 12.77 | 99.79 |
| chr2 | 13129917 | 13274864 | 144948 | 0.68 | C_unshiu_00143 | 284433 | 139487 | 144947 | 36.34 | 99.88 |
| chr2 | 13275289 | 13355196 | 79908  | 0.37 | C_unshiu_00143 | 138625 | 58689  | 79937  | 20.04 | 99.96 |
| chr2 | 13355300 | 13357813 | 2514   | 0.01 | C_unshiu_00143 | 57605  | 55092  | 2514   | 0.63  | 100   |
| chr2 | 13357796 | 13360135 | 2340   | 0.01 | C_unshiu_00467 | 97714  | 95376  | 2339   | 1.15  | 99.87 |
| chr2 | 13360136 | 13366948 | 6813   | 0.03 | C_unshiu_00143 | 54054  | 47242  | 6813   | 1.71  | 99.9  |
| chr2 | 13371787 | 13374091 | 2305   | 0.01 | C_unshiu_00143 | 41695  | 39391  | 2305   | 0.58  | 100   |
| chr2 | 13374093 | 13377932 | 3840   | 0.02 | C_unshiu_00091 | 63380  | 67219  | 3840   | 0.82  | 99.97 |
| chr2 | 13382380 | 13383746 | 1367   | 0.01 | C_unshiu_00143 | 37654  | 36289  | 1366   | 0.34  | 99.93 |
| chr2 | 13385064 | 13395446 | 10383  | 0.05 | C_unshiu_00091 | 4407   | 14790  | 10384  | 2.22  | 99.98 |
| chr2 | 13397767 | 13406836 | 9070   | 0.04 | C_unshiu_00091 | 15932  | 24999  | 9068   | 1.94  | 99.46 |
| chr2 | 13406856 | 13411884 | 5029   | 0.02 | C_unshiu_00091 | 43826  | 48854  | 5029   | 1.08  | 100   |
| chr2 | 13413646 | 13420074 | 6429   | 0.03 | C_unshiu_00091 | 26611  | 33014  | 6404   | 1.37  | 98.99 |
| chr2 | 13420193 | 13430564 | 10372  | 0.05 | C_unshiu_00091 | 33118  | 43440  | 10323  | 2.21  | 98.26 |
| chr2 | 13435505 | 13439356 | 3852   | 0.02 | C_unshiu_00091 | 48800  | 52652  | 3853   | 0.82  | 99.97 |
| chr2 | 13440336 | 13446825 | 6490   | 0.03 | C_unshiu_00091 | 54446  | 60951  | 6506   | 1.39  | 99.28 |
| chr2 | 13446859 | 13449145 | 2287   | 0.01 | C_unshiu_00091 | 61166  | 63449  | 2284   | 0.49  | 99.52 |
| chr2 | 13449654 | 13451944 | 2291   | 0.01 | C_unshiu_00143 | 45318  | 43028  | 2291   | 0.57  | 100   |
| chr2 | 13452372 | 13457028 | 4657   | 0.02 | C_unshiu_00091 | 68035  | 72691  | 4657   | 1     | 100   |
| chr2 | 13457745 | 13464205 | 6461   | 0.03 | C_unshiu_00598 | 64405  | 57945  | 6461   | 3.84  | 100   |
| chr2 | 13464206 | 13502618 | 38413  | 0.18 | C_unshiu_00091 | 81525  | 119930 | 38406  | 8.22  | 99.46 |
| chr2 | 13502726 | 13535463 | 32738  | 0.15 | C_unshiu_00091 | 119930 | 152677 | 32748  | 7.01  | 99.96 |
| chr2 | 13535268 | 13541826 | 6559   | 0.03 | C_unshiu_00091 | 152582 | 159183 | 6602   | 1.41  | 99.14 |
| chr2 | 13547967 | 13554854 | 6888   | 0.03 | C_unshiu_00091 | 158705 | 165597 | 6893   | 1.47  | 99.77 |
| chr2 | 13555559 | 13603270 | 47712  | 0.22 | C_unshiu_00091 | 166661 | 214446 | 47786  | 10.22 | 99.79 |

|      |          |          |        |      |                |         |         |        |       |       |
|------|----------|----------|--------|------|----------------|---------|---------|--------|-------|-------|
| chr2 | 13583333 | 13661110 | 77778  | 0.36 | C_unshiu_00091 | 194463  | 272274  | 77812  | 16.65 | 99.91 |
| chr2 | 13663020 | 13688987 | 25968  | 0.12 | C_unshiu_00091 | 279620  | 305580  | 25961  | 5.55  | 99.82 |
| chr2 | 13688550 | 13701026 | 12477  | 0.06 | C_unshiu_00091 | 310167  | 322622  | 12456  | 2.67  | 99.8  |
| chr2 | 13701076 | 13841261 | 140186 | 0.66 | C_unshiu_00091 | 322537  | 462753  | 140217 | 30    | 99.93 |
| chr2 | 13841213 | 13845703 | 4491   | 0.02 | C_unshiu_00091 | 462875  | 467367  | 4493   | 0.96  | 99.84 |
| chr2 | 13855729 | 13870640 | 14912  | 0.07 | C_unshiu_00027 | 733754  | 718842  | 14913  | 2.03  | 99.7  |
| chr2 | 13871866 | 13876398 | 4533   | 0.02 | C_unshiu_00027 | 718425  | 713893  | 4533   | 0.62  | 99.96 |
| chr2 | 13882855 | 13909374 | 26520  | 0.12 | C_unshiu_00027 | 703321  | 676835  | 26487  | 3.61  | 99.88 |
| chr2 | 13889383 | 13932649 | 43267  | 0.2  | C_unshiu_00027 | 696806  | 653597  | 43210  | 5.89  | 99.59 |
| chr2 | 13934770 | 13971181 | 36412  | 0.17 | C_unshiu_00027 | 652022  | 615686  | 36337  | 4.95  | 99.6  |
| chr2 | 13971198 | 13980755 | 9558   | 0.04 | C_unshiu_00027 | 615331  | 605774  | 9558   | 1.3   | 100   |
| chr2 | 13980618 | 14103709 | 123092 | 0.58 | C_unshiu_00027 | 605860  | 482842  | 123019 | 16.77 | 99.92 |
| chr2 | 14083717 | 14156909 | 73193  | 0.34 | C_unshiu_00027 | 502841  | 429635  | 73207  | 9.98  | 99.98 |
| chr2 | 14136922 | 14209687 | 72766  | 0.34 | C_unshiu_00027 | 449629  | 376860  | 72770  | 9.92  | 99.93 |
| chr2 | 14214893 | 14290612 | 75720  | 0.36 | C_unshiu_00027 | 368890  | 293168  | 75723  | 10.32 | 99.93 |
| chr2 | 14290594 | 14335527 | 44934  | 0.21 | C_unshiu_00027 | 293085  | 248184  | 44902  | 6.12  | 99.58 |
| chr2 | 14315519 | 14530424 | 214906 | 1.01 | C_unshiu_00027 | 268177  | 53334   | 214844 | 29.28 | 99.95 |
| chr2 | 14534458 | 14586630 | 52173  | 0.24 | C_unshiu_00027 | 52196   | 1       | 52196  | 7.11  | 99.95 |
| chr2 | 14580621 | 14611301 | 30681  | 0.14 | C_unshiu_00070 | 43845   | 74523   | 30679  | 5.87  | 99.95 |
| chr2 | 14591292 | 14674652 | 83361  | 0.39 | C_unshiu_00070 | 54522   | 137798  | 83277  | 15.93 | 99.77 |
| chr2 | 14686134 | 14693450 | 7317   | 0.03 | C_unshiu_00070 | 151328  | 158644  | 7317   | 1.4   | 100   |
| chr2 | 14695570 | 14701641 | 6072   | 0.03 | C_unshiu_00070 | 158935  | 165007  | 6073   | 1.16  | 99.98 |
| chr2 | 14703603 | 14769805 | 66203  | 0.31 | C_unshiu_00070 | 166324  | 232532  | 66209  | 12.67 | 99.97 |
| chr2 | 14769707 | 14852981 | 83275  | 0.39 | C_unshiu_00070 | 232502  | 315772  | 83271  | 15.93 | 99.95 |
| chr2 | 14832981 | 14889541 | 56561  | 0.27 | C_unshiu_00070 | 295780  | 352339  | 56560  | 10.82 | 99.97 |
| chr2 | 14888873 | 14908673 | 19801  | 0.09 | C_unshiu_00070 | 356395  | 376193  | 19799  | 3.79  | 99.87 |
| chr2 | 14911278 | 14986007 | 74730  | 0.35 | C_unshiu_00070 | 377912  | 452621  | 74710  | 14.29 | 99.91 |
| chr2 | 14986502 | 15021173 | 34672  | 0.16 | C_unshiu_00070 | 453797  | 488394  | 34598  | 6.62  | 99.4  |
| chr2 | 15021873 | 15048602 | 26730  | 0.13 | C_unshiu_00070 | 488768  | 515533  | 26766  | 5.12  | 99.69 |
| chr2 | 15042369 | 15067558 | 25190  | 0.12 | C_unshiu_00153 | 382131  | 356943  | 25189  | 6.59  | 99.99 |
| chr2 | 15068709 | 15167153 | 98445  | 0.46 | C_unshiu_00153 | 355383  | 256932  | 98452  | 25.76 | 99.96 |
| chr2 | 15167561 | 15170007 | 2447   | 0.01 | C_unshiu_00383 | 209850  | 212296  | 2447   | 1.08  | 100   |
| chr2 | 15170020 | 15281367 | 111348 | 0.52 | C_unshiu_00153 | 254520  | 143308  | 111213 | 29.1  | 99.74 |
| chr2 | 15281353 | 15301412 | 20060  | 0.09 | C_unshiu_00153 | 143273  | 123224  | 20050  | 5.25  | 99.94 |
| chr2 | 15281401 | 15378006 | 96606  | 0.45 | C_unshiu_00153 | 143225  | 46623   | 96603  | 25.28 | 99.94 |
| chr2 | 15379324 | 15381082 | 1759   | 0.01 | C_unshiu_02262 | 30988   | 29230   | 1759   | 5.64  | 98.3  |
| chr2 | 15381098 | 15398029 | 16932  | 0.08 | C_unshiu_00153 | 44557   | 27652   | 16906  | 4.42  | 99.84 |
| chr2 | 15381317 | 15423577 | 42261  | 0.2  | C_unshiu_00153 | 44338   | 2100    | 42239  | 11.05 | 99.71 |
| chr2 | 15421637 | 15423756 | 2120   | 0.01 | C_unshiu_00153 | 1       | 2120    | 2120   | 0.55  | 100   |
| chr2 | 15424247 | 15464890 | 40644  | 0.19 | C_unshiu_00002 | 1590025 | 1549381 | 40645  | 2.56  | 99.98 |
| chr2 | 15471656 | 15577909 | 106254 | 0.5  | C_unshiu_00002 | 1540192 | 1433913 | 106280 | 6.68  | 99.96 |
| chr2 | 15574101 | 15615766 | 41666  | 0.2  | C_unshiu_00002 | 1437721 | 1396071 | 41651  | 2.62  | 99.84 |
| chr2 | 15615794 | 15644676 | 28883  | 0.14 | C_unshiu_00002 | 1396214 | 1367360 | 28855  | 1.81  | 99.88 |
| chr2 | 15624690 | 15647751 | 23062  | 0.11 | C_unshiu_00002 | 1387315 | 1364285 | 23031  | 1.45  | 99.86 |
| chr2 | 15647694 | 15666442 | 18749  | 0.09 | C_unshiu_00002 | 1364183 | 1345409 | 18775  | 1.18  | 99.83 |
| chr2 | 15666453 | 15718035 | 51583  | 0.24 | C_unshiu_00002 | 1345214 | 1293640 | 51575  | 3.24  | 99.98 |
| chr2 | 15718207 | 15798410 | 80204  | 0.38 | C_unshiu_00002 | 1293014 | 1212787 | 80228  | 5.05  | 99.97 |
| chr2 | 15798347 | 15815814 | 17468  | 0.08 | C_unshiu_00002 | 1212783 | 1195323 | 17461  | 1.1   | 99.94 |
| chr2 | 15815711 | 15889962 | 74252  | 0.35 | C_unshiu_00002 | 1195295 | 1121008 | 74288  | 4.67  | 99.93 |
| chr2 | 15870012 | 15990405 | 120394 | 0.56 | C_unshiu_00002 | 1140987 | 1020519 | 120469 | 7.58  | 99.92 |
| chr2 | 15990156 | 16045676 | 55521  | 0.26 | C_unshiu_00002 | 1020198 | 964716  | 55483  | 3.49  | 99.87 |
| chr2 | 16045572 | 16175710 | 130139 | 0.61 | C_unshiu_00002 | 964770  | 834567  | 130204 | 8.19  | 99.92 |
| chr2 | 16155694 | 16222705 | 67012  | 0.31 | C_unshiu_00002 | 854591  | 787571  | 67021  | 4.22  | 99.99 |
| chr2 | 16222701 | 16273184 | 50484  | 0.24 | C_unshiu_00002 | 787283  | 736828  | 50456  | 3.17  | 99.91 |
| chr2 | 16273111 | 16330698 | 57588  | 0.27 | C_unshiu_00002 | 736827  | 679262  | 57566  | 3.62  | 99.9  |
| chr2 | 16330664 | 16478157 | 147494 | 0.69 | C_unshiu_00002 | 679239  | 531786  | 147454 | 9.27  | 99.93 |
| chr2 | 16458173 | 16581479 | 123307 | 0.58 | C_unshiu_00002 | 551739  | 428465  | 123275 | 7.75  | 99.96 |
| chr2 | 16561474 | 16675164 | 113691 | 0.53 | C_unshiu_00002 | 448463  | 334770  | 113694 | 7.15  | 99.92 |
| chr2 | 16655186 | 16819410 | 164225 | 0.77 | C_unshiu_00002 | 354759  | 190620  | 164140 | 10.32 | 99.92 |
| chr2 | 16799404 | 16890116 | 90713  | 0.43 | C_unshiu_00002 | 210620  | 119889  | 90732  | 5.71  | 99.95 |
| chr2 | 16892711 | 16912713 | 20003  | 0.09 | C_unshiu_00002 | 118896  | 98887   | 20010  | 1.26  | 99.96 |
| chr2 | 16892727 | 16915729 | 23003  | 0.11 | C_unshiu_00002 | 118880  | 95872   | 23009  | 1.45  | 99.97 |
| chr2 | 16915805 | 16949116 | 33312  | 0.16 | C_unshiu_00002 | 95733   | 62405   | 33329  | 2.1   | 99.95 |
| chr2 | 16957299 | 16961800 | 4502   | 0.02 | C_unshiu_01489 | 55723   | 51222   | 4502   | 7.06  | 100   |
| chr2 | 16965633 | 16973380 | 7748   | 0.04 | C_unshiu_01489 | 48221   | 40463   | 7759   | 12.16 | 99.81 |
| chr2 | 16974927 | 16980916 | 5990   | 0.03 | C_unshiu_01489 | 37347   | 31331   | 6017   | 9.43  | 99.37 |
| chr2 | 16982381 | 16985632 | 3252   | 0.02 | C_unshiu_01489 | 30483   | 27256   | 3228   | 5.06  | 99.02 |
| chr2 | 16985653 | 16994648 | 8996   | 0.04 | C_unshiu_01489 | 27147   | 18113   | 9035   | 14.16 | 98.48 |
| chr2 | 16995262 | 17004728 | 9467   | 0.04 | C_unshiu_01489 | 15335   | 5820    | 9516   | 14.92 | 98.76 |
| chr2 | 17006542 | 17013226 | 6685   | 0.03 | C_unshiu_00671 | 2834    | 9520    | 6687   | 4.41  | 99.9  |
| chr2 | 17012780 | 17039255 | 26476  | 0.12 | C_unshiu_00671 | 14244   | 40733   | 26490  | 17.48 | 99.39 |
| chr2 | 17049368 | 17051937 | 2570   | 0.01 | C_unshiu_00671 | 43723   | 46309   | 2587   | 1.71  | 98.22 |
| chr2 | 17056398 | 17060673 | 4276   | 0.02 | C_unshiu_00671 | 47219   | 51497   | 4279   | 2.82  | 99.02 |
| chr2 | 17064625 | 17066741 | 2117   | 0.01 | C_unshiu_00002 | 59560   | 57444   | 2117   | 0.13  | 99.48 |
| chr2 | 17066761 | 17079965 | 13205  | 0.06 | C_unshiu_00002 | 57163   | 43960   | 13204  | 0.83  | 99.99 |
| chr2 | 17079920 | 17123923 | 44004  | 0.21 | C_unshiu_00002 | 43959   | 1       | 43959  | 2.76  | 99.69 |
| chr2 | 17119676 | 17277387 | 157712 | 0.74 | C_unshiu_00074 | 279402  | 121674  | 157729 | 30.76 | 99.86 |
| chr2 | 17277393 | 17278881 | 1489   | 0.01 | C_unshiu_00048 | 618960  | 617472  | 1489   | 0.24  | 100   |
| chr2 | 17283117 | 17395208 | 112092 | 0.53 | C_unshiu_00048 | 613381  | 501288  | 112094 | 18.07 | 99.92 |

|      |          |          |        |      |                |         |         |        |       |       |
|------|----------|----------|--------|------|----------------|---------|---------|--------|-------|-------|
| chr2 | 17398455 | 17400342 | 1888   | 0.01 | C_unshiu_00048 | 500164  | 498276  | 1889   | 0.3   | 99.63 |
| chr2 | 17401942 | 17403922 | 1981   | 0.01 | C_unshiu_00048 | 496361  | 494380  | 1982   | 0.32  | 99.8  |
| chr2 | 17406267 | 17411155 | 4889   | 0.02 | C_unshiu_00048 | 491232  | 486344  | 4889   | 0.79  | 99.63 |
| chr2 | 17410251 | 17434382 | 24132  | 0.11 | C_unshiu_00048 | 486824  | 462689  | 24136  | 3.89  | 99.59 |
| chr2 | 17414411 | 17573428 | 159018 | 0.75 | C_unshiu_00048 | 482682  | 323690  | 158993 | 25.64 | 99.91 |
| chr2 | 17578369 | 17602085 | 23717  | 0.11 | C_unshiu_00048 | 318491  | 294802  | 23690  | 3.82  | 99.83 |
| chr2 | 17602737 | 17662306 | 59570  | 0.28 | C_unshiu_00048 | 293735  | 234158  | 59578  | 9.61  | 99.97 |
| chr2 | 17662230 | 17751346 | 89117  | 0.42 | C_unshiu_00048 | 234196  | 145198  | 88999  | 14.35 | 99.61 |
| chr2 | 17751371 | 17810397 | 59027  | 0.28 | C_unshiu_00048 | 145763  | 86726   | 59038  | 9.52  | 99.94 |
| chr2 | 17810403 | 17820871 | 10469  | 0.05 | C_unshiu_00048 | 86629   | 76159   | 10471  | 1.69  | 99.94 |
| chr2 | 17820871 | 17893052 | 72182  | 0.34 | C_unshiu_00048 | 76049   | 3934    | 72116  | 11.63 | 99.8  |
| chr2 | 17895022 | 17896285 | 1264   | 0.01 | C_unshiu_00048 | 1265    | 1       | 1265   | 0.2   | 99.92 |
| chr2 | 17895175 | 17897439 | 2265   | 0.01 | C_unshiu_01497 | 1       | 2292    | 2292   | 3.61  | 98.21 |
| chr2 | 17897642 | 17952761 | 55120  | 0.26 | C_unshiu_01497 | 2443    | 57564   | 55122  | 86.8  | 99.99 |
| chr2 | 17952761 | 17958691 | 5931   | 0.03 | C_unshiu_01497 | 63505   | 57575   | 5931   | 9.34  | 99.98 |
| chr2 | 17960282 | 17967836 | 7555   | 0.04 | C_unshiu_02161 | 1       | 7568    | 7568   | 21.88 | 99.37 |
| chr2 | 17982001 | 18188098 | 206098 | 0.97 | C_unshiu_00337 | 1256    | 207455  | 206200 | 82.44 | 99.83 |
| chr2 | 18168114 | 18225693 | 57580  | 0.27 | C_unshiu_00337 | 187481  | 245034  | 57554  | 23.01 | 99.86 |
| chr2 | 18224095 | 18258003 | 33909  | 0.16 | C_unshiu_00077 | 3667    | 37497   | 33831  | 6.76  | 99.4  |
| chr2 | 18260778 | 18503144 | 242367 | 1.14 | C_unshiu_00077 | 41539   | 283838  | 242300 | 48.44 | 99.87 |
| chr2 | 18483150 | 18595963 | 112814 | 0.53 | C_unshiu_00077 | 263859  | 376635  | 112777 | 22.55 | 99.89 |
| chr2 | 18596414 | 18608008 | 11595  | 0.05 | C_unshiu_00077 | 377138  | 388732  | 11595  | 2.32  | 99.86 |
| chr2 | 18607553 | 18609099 | 1547   | 0.01 | C_unshiu_00077 | 393254  | 394800  | 1547   | 0.31  | 99.94 |
| chr2 | 18611113 | 18705992 | 94880  | 0.44 | C_unshiu_00077 | 399589  | 494450  | 94862  | 18.97 | 99.72 |
| chr2 | 18708594 | 18714181 | 5588   | 0.03 | C_unshiu_00309 | 236860  | 242448  | 5589   | 2.14  | 99.19 |
| chr2 | 18719670 | 18722187 | 2518   | 0.01 | C_unshiu_02167 | 8932    | 6408    | 2525   | 7.32  | 98.46 |
| chr2 | 18722120 | 18723552 | 1433   | 0.01 | C_unshiu_00739 | 131502  | 130071  | 1432   | 1.04  | 99.23 |
| chr2 | 18778194 | 18780317 | 2124   | 0.01 | C_unshiu_00007 | 1104295 | 1102150 | 2146   | 0.19  | 98.65 |
| chr2 | 18791336 | 18819920 | 28585  | 0.13 | C_unshiu_00007 | 1093318 | 1064634 | 28685  | 2.56  | 98.71 |
| chr2 | 18848162 | 18857229 | 9068   | 0.04 | C_unshiu_00007 | 1037184 | 1028070 | 9115   | 0.81  | 99.05 |
| chr2 | 18859294 | 18861433 | 2140   | 0.01 | C_unshiu_00007 | 1027299 | 1025153 | 2147   | 0.19  | 98.42 |
| chr2 | 18867388 | 18869091 | 1704   | 0.01 | C_unshiu_00082 | 256206  | 257909  | 1704   | 0.36  | 100   |
| chr2 | 18869115 | 18871217 | 2103   | 0.01 | C_unshiu_00007 | 1024009 | 1021898 | 2112   | 0.19  | 98.91 |
| chr2 | 18871586 | 18874974 | 3389   | 0.02 | C_unshiu_00007 | 1021242 | 1017847 | 3396   | 0.3   | 98.13 |
| chr2 | 18877284 | 18885683 | 8400   | 0.04 | C_unshiu_00007 | 1017073 | 1008659 | 8415   | 0.75  | 98.4  |
| chr2 | 18897332 | 18910966 | 13635  | 0.06 | C_unshiu_00007 | 1000120 | 986502  | 13619  | 1.22  | 98.12 |
| chr2 | 18910991 | 18922032 | 11042  | 0.05 | C_unshiu_00007 | 985518  | 974419  | 11100  | 0.99  | 98.53 |
| chr2 | 18938018 | 18944099 | 6082   | 0.03 | C_unshiu_00007 | 958923  | 952815  | 6109   | 0.55  | 98.64 |
| chr2 | 18947909 | 18951820 | 3912   | 0.02 | C_unshiu_00007 | 951536  | 947604  | 3933   | 0.35  | 98.07 |
| chr2 | 18971434 | 18975006 | 3573   | 0.02 | C_unshiu_00007 | 928804  | 925226  | 3579   | 0.32  | 98.99 |
| chr2 | 18979127 | 18991718 | 12592  | 0.06 | C_unshiu_00007 | 918961  | 906329  | 12633  | 1.13  | 98.6  |
| chr2 | 19008710 | 19015328 | 6619   | 0.03 | C_unshiu_00007 | 890941  | 884320  | 6622   | 0.59  | 99.43 |
| chr2 | 19018142 | 19022698 | 4557   | 0.02 | C_unshiu_00007 | 880502  | 875957  | 4546   | 0.41  | 98.07 |
| chr2 | 19022731 | 19030061 | 7331   | 0.03 | C_unshiu_00007 | 875963  | 868640  | 7324   | 0.65  | 99.41 |
| chr2 | 19040512 | 19047212 | 6701   | 0.03 | C_unshiu_00007 | 861036  | 854330  | 6707   | 0.6   | 98.87 |
| chr2 | 19047211 | 19085594 | 38384  | 0.18 | C_unshiu_00007 | 854116  | 815672  | 38445  | 3.43  | 98.8  |
| chr2 | 19085611 | 19091076 | 5466   | 0.03 | C_unshiu_00007 | 815561  | 810064  | 5498   | 0.49  | 98.18 |
| chr2 | 19093652 | 19135464 | 41813  | 0.2  | C_unshiu_00007 | 807881  | 766055  | 41827  | 3.73  | 98.7  |
| chr2 | 19135794 | 19141280 | 5487   | 0.03 | C_unshiu_00007 | 766124  | 760630  | 5495   | 0.49  | 99.42 |
| chr2 | 19141278 | 19182255 | 40978  | 0.19 | C_unshiu_00007 | 759939  | 718949  | 40991  | 3.66  | 99.78 |
| chr2 | 19190632 | 19221704 | 31073  | 0.15 | C_unshiu_00007 | 718734  | 687733  | 31002  | 2.77  | 99.15 |
| chr2 | 19222322 | 19236347 | 14026  | 0.07 | C_unshiu_00007 | 686692  | 672601  | 14092  | 1.26  | 99.13 |
| chr2 | 19237230 | 19254287 | 17058  | 0.08 | C_unshiu_00007 | 672608  | 655496  | 17113  | 1.53  | 98.4  |
| chr2 | 19254282 | 19256361 | 2080   | 0.01 | C_unshiu_00007 | 655466  | 653379  | 2088   | 0.19  | 98.71 |
| chr2 | 19256981 | 19275175 | 18195  | 0.09 | C_unshiu_00007 | 653235  | 635011  | 18225  | 1.63  | 99.31 |
| chr2 | 19275176 | 19337051 | 61876  | 0.29 | C_unshiu_00007 | 634884  | 573008  | 61877  | 5.52  | 99.53 |
| chr2 | 19342367 | 19362331 | 19965  | 0.09 | C_unshiu_00007 | 573022  | 553062  | 19961  | 1.78  | 99.41 |
| chr2 | 19362328 | 19401239 | 38912  | 0.18 | C_unshiu_00007 | 551404  | 512512  | 38893  | 3.47  | 99.45 |
| chr2 | 19413485 | 19417473 | 3989   | 0.02 | C_unshiu_00007 | 509865  | 505876  | 3990   | 0.36  | 99.8  |
| chr2 | 19418761 | 19442424 | 23664  | 0.11 | C_unshiu_00007 | 505856  | 482171  | 23686  | 2.11  | 99.31 |
| chr2 | 19442424 | 19471777 | 29354  | 0.14 | C_unshiu_00007 | 482023  | 452674  | 29350  | 2.62  | 99.78 |
| chr2 | 19475604 | 19549397 | 73794  | 0.35 | C_unshiu_00007 | 448783  | 374955  | 73829  | 6.59  | 99.9  |
| chr2 | 19549525 | 19581432 | 31908  | 0.15 | C_unshiu_00007 | 374445  | 342538  | 31908  | 2.85  | 99.98 |
| chr2 | 19581213 | 19730796 | 149584 | 0.7  | C_unshiu_00007 | 342330  | 192754  | 149577 | 13.35 | 99.97 |
| chr2 | 19710802 | 19816297 | 105496 | 0.49 | C_unshiu_00007 | 212758  | 107221  | 105538 | 9.42  | 99.86 |
| chr2 | 19816297 | 19825500 | 9204   | 0.04 | C_unshiu_00007 | 107114  | 97968   | 9147   | 0.82  | 98.58 |
| chr2 | 19825949 | 19885697 | 59749  | 0.28 | C_unshiu_00007 | 97971   | 38171   | 59801  | 5.34  | 99.05 |
| chr2 | 19885674 | 19888874 | 3201   | 0.02 | C_unshiu_00007 | 38153   | 34943   | 3211   | 0.29  | 99.6  |
| chr2 | 19888873 | 19894988 | 6116   | 0.03 | C_unshiu_00007 | 34908   | 28756   | 6153   | 0.55  | 99.12 |
| chr2 | 19896030 | 19902471 | 6442   | 0.03 | C_unshiu_00007 | 27262   | 20784   | 6479   | 0.58  | 98.95 |
| chr2 | 19902469 | 19907974 | 5506   | 0.03 | C_unshiu_00007 | 20851   | 15293   | 5559   | 0.5   | 98.33 |
| chr2 | 19912067 | 19914233 | 2167   | 0.01 | C_unshiu_00007 | 10485   | 8319    | 2167   | 0.19  | 99.35 |
| chr2 | 19916803 | 19919834 | 3032   | 0.01 | C_unshiu_00355 | 4007    | 7035    | 3029   | 1.27  | 99.24 |
| chr2 | 19938124 | 19941797 | 3674   | 0.02 | C_unshiu_00355 | 21190   | 24867   | 3678   | 1.55  | 98.72 |
| chr2 | 19941786 | 19962604 | 20819  | 0.1  | C_unshiu_00355 | 25089   | 45924   | 20836  | 8.76  | 98.38 |
| chr2 | 19983909 | 20014561 | 30653  | 0.14 | C_unshiu_00355 | 105430  | 136135  | 30706  | 12.91 | 99.08 |
| chr2 | 20015258 | 20065454 | 50197  | 0.24 | C_unshiu_00355 | 136534  | 186791  | 50258  | 21.14 | 99.14 |
| chr2 | 20069203 | 20084703 | 15501  | 0.07 | C_unshiu_00355 | 190878  | 206391  | 15514  | 6.52  | 99.74 |
| chr2 | 20084761 | 20090487 | 5727   | 0.03 | C_unshiu_00355 | 206383  | 212102  | 5720   | 2.41  | 98.95 |

|      |          |          |        |      |                |        |        |        |       |       |
|------|----------|----------|--------|------|----------------|--------|--------|--------|-------|-------|
| chr2 | 20090488 | 20095815 | 5328   | 0.02 | C_unshiu_00355 | 212203 | 217564 | 5362   | 2.26  | 98.16 |
| chr2 | 20095810 | 20101811 | 6002   | 0.03 | C_unshiu_00614 | 1063   | 7084   | 6022   | 3.66  | 98.67 |
| chr2 | 20103653 | 20144142 | 40490  | 0.19 | C_unshiu_00614 | 9955   | 50373  | 40419  | 24.59 | 99.01 |
| chr2 | 20144860 | 20176202 | 31343  | 0.15 | C_unshiu_00614 | 51356  | 82672  | 31317  | 19.05 | 99.03 |
| chr2 | 20184877 | 20193481 | 8605   | 0.04 | C_unshiu_00614 | 90790  | 99357  | 8568   | 5.21  | 98.29 |
| chr2 | 20194710 | 20208356 | 13647  | 0.06 | C_unshiu_00614 | 98206  | 111914 | 13709  | 8.34  | 99.22 |
| chr2 | 20216268 | 20232394 | 16127  | 0.08 | C_unshiu_00614 | 121017 | 137147 | 16131  | 9.81  | 98.91 |
| chr2 | 20233753 | 20246286 | 12534  | 0.06 | C_unshiu_00614 | 138964 | 151529 | 12566  | 7.65  | 98.96 |
| chr2 | 20246365 | 20250830 | 4466   | 0.02 | C_unshiu_00614 | 152160 | 156623 | 4464   | 2.72  | 99.69 |
| chr2 | 20258624 | 20262099 | 3476   | 0.02 | C_unshiu_00846 | 35359  | 38822  | 3464   | 2.82  | 98.94 |
| chr2 | 20274407 | 20279227 | 4821   | 0.02 | C_unshiu_00036 | 238327 | 233495 | 4833   | 0.71  | 98.2  |
| chr2 | 20280685 | 20283956 | 3272   | 0.02 | C_unshiu_00846 | 5221   | 1939   | 3283   | 2.67  | 99.57 |
| chr2 | 20286808 | 20298700 | 11893  | 0.06 | C_unshiu_00036 | 217034 | 205119 | 11916  | 1.74  | 99.42 |
| chr2 | 20298692 | 20304684 | 5993   | 0.03 | C_unshiu_00036 | 203764 | 197790 | 5975   | 0.87  | 99.37 |
| chr2 | 20304676 | 20308763 | 4088   | 0.02 | C_unshiu_00036 | 197338 | 193244 | 4095   | 0.6   | 99.66 |
| chr2 | 20310635 | 20315617 | 4983   | 0.02 | C_unshiu_00036 | 189905 | 184910 | 4996   | 0.73  | 98.84 |
| chr2 | 20339164 | 20360525 | 21362  | 0.1  | C_unshiu_00036 | 161042 | 139702 | 21341  | 3.12  | 98.01 |
| chr2 | 20370887 | 20404371 | 33485  | 0.16 | C_unshiu_00036 | 127691 | 94196  | 33496  | 4.9   | 99.77 |
| chr2 | 20412171 | 20413470 | 1300   | 0.01 | C_unshiu_00036 | 87539  | 86241  | 1299   | 0.19  | 98.92 |
| chr2 | 20413478 | 20441948 | 28471  | 0.13 | C_unshiu_00036 | 85781  | 57283  | 28499  | 4.17  | 99.66 |
| chr2 | 20453721 | 20455685 | 1965   | 0.01 | C_unshiu_00271 | 39364  | 41328  | 1965   | 0.7   | 99.13 |
| chr2 | 20454005 | 20456968 | 2964   | 0.01 | C_unshiu_00036 | 47680  | 44716  | 2965   | 0.43  | 98.48 |
| chr2 | 20457469 | 20458601 | 1133   | 0.01 | C_unshiu_00036 | 43973  | 42840  | 1134   | 0.17  | 99.47 |
| chr2 | 20458373 | 20496499 | 38127  | 0.18 | C_unshiu_00036 | 42831  | 4705   | 38127  | 5.58  | 99.51 |
| chr2 | 20496503 | 20501202 | 4700   | 0.02 | C_unshiu_00036 | 5      | 4703   | 4699   | 0.69  | 99.91 |
| chr2 | 20513665 | 20517486 | 3822   | 0.02 | C_unshiu_00085 | 406194 | 409999 | 3806   | 0.81  | 99.45 |
| chr2 | 20517478 | 20523287 | 5810   | 0.03 | C_unshiu_00085 | 410336 | 416101 | 5766   | 1.22  | 98.37 |
| chr2 | 20523282 | 20543967 | 20686  | 0.1  | C_unshiu_00085 | 400160 | 379478 | 20683  | 4.38  | 99.76 |
| chr2 | 20544495 | 20550758 | 6264   | 0.03 | C_unshiu_00085 | 379103 | 372852 | 6252   | 1.32  | 99.2  |
| chr2 | 20551560 | 20575421 | 23862  | 0.11 | C_unshiu_00085 | 372800 | 348980 | 23821  | 5.04  | 98.79 |
| chr2 | 20575421 | 20576462 | 1042   | 0    | C_unshiu_00085 | 348890 | 347849 | 1042   | 0.22  | 100   |
| chr2 | 20579479 | 20582050 | 2572   | 0.01 | C_unshiu_00085 | 345929 | 343358 | 2572   | 0.54  | 100   |
| chr2 | 20589590 | 20591332 | 1743   | 0.01 | C_unshiu_00102 | 14503  | 12761  | 1743   | 0.38  | 99.94 |
| chr2 | 20606920 | 20608309 | 1390   | 0.01 | C_unshiu_00085 | 327674 | 326281 | 1394   | 0.3   | 99.28 |
| chr2 | 20608783 | 20610950 | 2168   | 0.01 | C_unshiu_00085 | 325540 | 323370 | 2171   | 0.46  | 99.77 |
| chr2 | 20613296 | 20676954 | 63659  | 0.3  | C_unshiu_00085 | 322323 | 258683 | 63641  | 13.48 | 99.2  |
| chr2 | 20676468 | 20696754 | 20287  | 0.1  | C_unshiu_00085 | 259057 | 238767 | 20291  | 4.3   | 99.74 |
| chr2 | 20702321 | 20714697 | 12377  | 0.06 | C_unshiu_00085 | 233336 | 220960 | 12377  | 2.62  | 99.94 |
| chr2 | 20714689 | 20720610 | 5922   | 0.03 | C_unshiu_00085 | 220109 | 214187 | 5923   | 1.25  | 99.71 |
| chr2 | 20720597 | 20738435 | 17839  | 0.08 | C_unshiu_00085 | 213847 | 195986 | 17862  | 3.78  | 99.41 |
| chr2 | 20738449 | 20741746 | 3298   | 0.02 | C_unshiu_00085 | 195408 | 192097 | 3312   | 0.7   | 99.28 |
| chr2 | 20744500 | 20746295 | 1796   | 0.01 | C_unshiu_00085 | 188688 | 190480 | 1793   | 0.38  | 99.5  |
| chr2 | 20744602 | 20774818 | 30217  | 0.14 | C_unshiu_00085 | 188689 | 158400 | 30290  | 6.41  | 99.2  |
| chr2 | 20774995 | 20786610 | 11616  | 0.05 | C_unshiu_00085 | 158299 | 146693 | 11607  | 2.46  | 98.83 |
| chr2 | 20786595 | 20847698 | 61104  | 0.29 | C_unshiu_00085 | 146505 | 85376  | 61130  | 12.94 | 99.83 |
| chr2 | 20847700 | 20855571 | 7872   | 0.04 | C_unshiu_00085 | 85411  | 77432  | 7980   | 1.69  | 98.17 |
| chr2 | 20856513 | 20864638 | 8126   | 0.04 | C_unshiu_00311 | 2260   | 10379  | 8120   | 3.12  | 99.3  |
| chr2 | 20866960 | 20904845 | 37886  | 0.18 | C_unshiu_00311 | 12046  | 50040  | 37995  | 14.61 | 99.16 |
| chr2 | 20906993 | 20979793 | 72801  | 0.34 | C_unshiu_00311 | 50994  | 123831 | 72838  | 28.01 | 99.28 |
| chr2 | 20980094 | 20994071 | 13978  | 0.07 | C_unshiu_00311 | 124006 | 137984 | 13979  | 5.38  | 99.62 |
| chr2 | 20994319 | 21011160 | 16842  | 0.08 | C_unshiu_00394 | 4902   | 21785  | 16884  | 7.54  | 99.45 |
| chr2 | 21011152 | 21013490 | 2339   | 0.01 | C_unshiu_00394 | 22431  | 24763  | 2333   | 1.04  | 98.34 |
| chr2 | 21013725 | 21027002 | 13278  | 0.06 | C_unshiu_00394 | 24459  | 37734  | 13276  | 5.93  | 98.96 |
| chr2 | 21027020 | 21070560 | 43541  | 0.2  | C_unshiu_00394 | 37905  | 81492  | 43588  | 19.46 | 98.65 |
| chr2 | 21076962 | 21089037 | 12076  | 0.06 | C_unshiu_00394 | 87478  | 99559  | 12082  | 5.39  | 99.34 |
| chr2 | 21093753 | 21133786 | 40034  | 0.19 | C_unshiu_00394 | 103804 | 143807 | 40004  | 17.86 | 99.75 |
| chr2 | 21133782 | 21136966 | 3185   | 0.01 | C_unshiu_00394 | 144503 | 147693 | 3191   | 1.42  | 99.66 |
| chr2 | 21161255 | 21182712 | 21458  | 0.1  | C_unshiu_00394 | 172763 | 194258 | 21496  | 9.6   | 99.39 |
| chr2 | 21188800 | 21211820 | 23021  | 0.11 | C_unshiu_00394 | 194414 | 217427 | 23014  | 10.27 | 99.46 |
| chr2 | 21211814 | 21222808 | 10995  | 0.05 | C_unshiu_00366 | 224640 | 213658 | 10983  | 4.7   | 98.87 |
| chr2 | 21222892 | 21226344 | 3453   | 0.02 | C_unshiu_00366 | 212843 | 209388 | 3456   | 1.48  | 99.86 |
| chr2 | 21226340 | 21287838 | 61499  | 0.29 | C_unshiu_00366 | 209155 | 147547 | 61609  | 26.34 | 99.39 |
| chr2 | 21288312 | 21289845 | 1534   | 0.01 | C_unshiu_00366 | 147578 | 146045 | 1534   | 0.66  | 99.74 |
| chr2 | 21290322 | 21296604 | 6283   | 0.03 | C_unshiu_00366 | 145255 | 138984 | 6272   | 2.68  | 99.16 |
| chr2 | 21296799 | 21313308 | 16510  | 0.08 | C_unshiu_00366 | 138476 | 121995 | 16482  | 7.05  | 98.8  |
| chr2 | 21313640 | 21315101 | 1462   | 0.01 | C_unshiu_00366 | 121058 | 119597 | 1462   | 0.63  | 100   |
| chr2 | 21318002 | 21319061 | 1060   | 0    | C_unshiu_00637 | 116200 | 115141 | 1060   | 0.66  | 100   |
| chr3 | 1        | 84409    | 84409  | 0.31 | C_unshiu_00033 | 304523 | 388928 | 84406  | 12.06 | 99.83 |
| chr3 | 86888    | 103274   | 16387  | 0.06 | C_unshiu_00033 | 391604 | 407979 | 16376  | 2.34  | 99.8  |
| chr3 | 102925   | 114171   | 11247  | 0.04 | C_unshiu_00033 | 407849 | 419094 | 11246  | 1.61  | 98.63 |
| chr3 | 119366   | 146945   | 27580  | 0.1  | C_unshiu_00033 | 416886 | 444474 | 27589  | 3.94  | 99.87 |
| chr3 | 148585   | 160205   | 11621  | 0.04 | C_unshiu_00033 | 446499 | 458072 | 11574  | 1.65  | 98.83 |
| chr3 | 160850   | 227769   | 66920  | 0.24 | C_unshiu_00033 | 459058 | 525982 | 66925  | 9.56  | 99.97 |
| chr3 | 229371   | 333884   | 104514 | 0.38 | C_unshiu_00033 | 526507 | 630901 | 104395 | 14.91 | 99.63 |
| chr3 | 334006   | 343209   | 9204   | 0.03 | C_unshiu_00033 | 630985 | 640174 | 9190   | 1.31  | 99.79 |
| chr3 | 343596   | 347762   | 4167   | 0.02 | C_unshiu_00033 | 641006 | 645197 | 4192   | 0.6   | 98.55 |
| chr3 | 347861   | 391535   | 43675  | 0.16 | C_unshiu_00033 | 645339 | 688998 | 43660  | 6.24  | 99.61 |
| chr3 | 391536   | 392726   | 1191   | 0    | C_unshiu_00834 | 20481  | 21671  | 1191   | 0.96  | 98.24 |
| chr3 | 402176   | 422253   | 20078  | 0.07 | C_unshiu_00245 | 167264 | 187342 | 20079  | 6.71  | 99.82 |

|      |         |         |        |      |                |        |        |        |       |       |
|------|---------|---------|--------|------|----------------|--------|--------|--------|-------|-------|
| chr3 | 422355  | 514000  | 91646  | 0.33 | C_unshiu_00206 | 5995   | 97683  | 91689  | 27.71 | 99.85 |
| chr3 | 494008  | 589434  | 95427  | 0.34 | C_unshiu_00206 | 77684  | 173199 | 95516  | 28.86 | 99.82 |
| chr3 | 592221  | 615449  | 23229  | 0.08 | C_unshiu_00206 | 172807 | 196049 | 23243  | 7.02  | 99.88 |
| chr3 | 620533  | 664878  | 44346  | 0.16 | C_unshiu_00206 | 200109 | 244456 | 44348  | 13.4  | 99.86 |
| chr3 | 664892  | 741763  | 76872  | 0.28 | C_unshiu_00206 | 244425 | 321309 | 76885  | 23.23 | 99.94 |
| chr3 | 737567  | 744380  | 6814   | 0.02 | C_unshiu_00206 | 321339 | 328104 | 6766   | 2.04  | 98.14 |
| chr3 | 768027  | 769117  | 1091   | 0    | C_unshiu_00971 | 3      | 1094   | 1092   | 1     | 99.73 |
| chr3 | 769195  | 863140  | 93946  | 0.34 | C_unshiu_00971 | 1224   | 95166  | 93943  | 85.75 | 99.84 |
| chr3 | 864373  | 948957  | 84585  | 0.31 | C_unshiu_00014 | 886084 | 801528 | 84557  | 9.36  | 99.84 |
| chr3 | 948979  | 952745  | 3767   | 0.01 | C_unshiu_00014 | 801082 | 797316 | 3767   | 0.42  | 100   |
| chr3 | 952892  | 1061045 | 108154 | 0.39 | C_unshiu_00014 | 796601 | 688425 | 108177 | 11.97 | 99.96 |
| chr3 | 1041053 | 1199352 | 158300 | 0.57 | C_unshiu_00014 | 708428 | 550071 | 158358 | 17.53 | 99.89 |
| chr3 | 1199334 | 1204464 | 5131   | 0.02 | C_unshiu_00014 | 549989 | 544858 | 5132   | 0.57  | 99.92 |
| chr3 | 1205012 | 1293406 | 88395  | 0.32 | C_unshiu_00014 | 543912 | 455526 | 88387  | 9.78  | 99.65 |
| chr3 | 1294597 | 1303529 | 8933   | 0.03 | C_unshiu_00014 | 453814 | 444881 | 8934   | 0.99  | 99.98 |
| chr3 | 1303074 | 1370167 | 67094  | 0.24 | C_unshiu_00014 | 440268 | 373196 | 67073  | 7.42  | 99.95 |
| chr3 | 1350180 | 1571052 | 220873 | 0.8  | C_unshiu_00014 | 393159 | 172298 | 220862 | 24.45 | 99.95 |
| chr3 | 1571618 | 1646713 | 75096  | 0.27 | C_unshiu_00014 | 171492 | 96426  | 75067  | 8.31  | 99.88 |
| chr3 | 1626716 | 1676778 | 50063  | 0.18 | C_unshiu_00014 | 116411 | 66340  | 50072  | 5.54  | 99.9  |
| chr3 | 1676917 | 1689902 | 12986  | 0.05 | C_unshiu_00014 | 66338  | 53336  | 13003  | 1.44  | 99.72 |
| chr3 | 1704265 | 1706706 | 2442   | 0.01 | C_unshiu_00126 | 382949 | 380514 | 2436   | 0.59  | 99.1  |
| chr3 | 1706700 | 1723891 | 17192  | 0.06 | C_unshiu_00126 | 379311 | 362140 | 17172  | 4.14  | 98.48 |
| chr3 | 1725030 | 1738697 | 13668  | 0.05 | C_unshiu_00126 | 361414 | 347738 | 13677  | 3.3   | 99.78 |
| chr3 | 1738755 | 1747841 | 9087   | 0.03 | C_unshiu_00126 | 347741 | 338614 | 9128   | 2.2   | 99.06 |
| chr3 | 1747840 | 1776302 | 28463  | 0.1  | C_unshiu_00126 | 338530 | 310058 | 28473  | 6.86  | 99.35 |
| chr3 | 1776295 | 1803816 | 27522  | 0.1  | C_unshiu_00126 | 309331 | 281775 | 27557  | 6.64  | 99.18 |
| chr3 | 1803944 | 1820687 | 16744  | 0.06 | C_unshiu_00126 | 281784 | 265020 | 16765  | 4.04  | 99.48 |
| chr3 | 1821834 | 1846129 | 24296  | 0.09 | C_unshiu_00126 | 265365 | 241176 | 24190  | 5.83  | 99.25 |
| chr3 | 1850907 | 1861586 | 10680  | 0.04 | C_unshiu_00126 | 241157 | 230503 | 10655  | 2.57  | 99.38 |
| chr3 | 1861578 | 1870568 | 8991   | 0.03 | C_unshiu_00126 | 230374 | 221331 | 9044   | 2.18  | 98.94 |
| chr3 | 1870568 | 1889641 | 19074  | 0.07 | C_unshiu_00126 | 221198 | 202070 | 19129  | 4.61  | 99.17 |
| chr3 | 1891533 | 1918705 | 27173  | 0.1  | C_unshiu_00126 | 200146 | 172972 | 27175  | 6.55  | 99.18 |
| chr3 | 1918697 | 1928968 | 10272  | 0.04 | C_unshiu_00126 | 171061 | 160792 | 10270  | 2.48  | 99.62 |
| chr3 | 1929004 | 1940682 | 11679  | 0.04 | C_unshiu_00126 | 160370 | 148652 | 11719  | 2.83  | 98.97 |
| chr3 | 1941539 | 1983508 | 41970  | 0.15 | C_unshiu_00126 | 146203 | 104169 | 42035  | 10.13 | 98.99 |
| chr3 | 1984964 | 1996511 | 11548  | 0.04 | C_unshiu_00126 | 101025 | 89482  | 11544  | 2.78  | 99.5  |
| chr3 | 2000557 | 2010341 | 9785   | 0.04 | C_unshiu_00126 | 82369  | 72583  | 9787   | 2.36  | 98.7  |
| chr3 | 2010338 | 2034780 | 24443  | 0.09 | C_unshiu_00126 | 72641  | 48148  | 24494  | 5.9   | 99.2  |
| chr3 | 2035979 | 2082228 | 46250  | 0.17 | C_unshiu_00126 | 46327  | 31     | 46297  | 11.16 | 99.42 |
| chr3 | 2082998 | 2098350 | 15353  | 0.06 | C_unshiu_00018 | 852149 | 836814 | 15336  | 1.8   | 99.26 |
| chr3 | 2098794 | 2125708 | 26915  | 0.1  | C_unshiu_00018 | 836304 | 809299 | 27006  | 3.17  | 99.4  |
| chr3 | 2125753 | 2130674 | 4922   | 0.02 | C_unshiu_00018 | 808903 | 803972 | 4932   | 0.58  | 99.53 |
| chr3 | 2146233 | 2185685 | 39453  | 0.14 | C_unshiu_00018 | 788027 | 748431 | 39597  | 4.65  | 98.89 |
| chr3 | 2201768 | 2204371 | 2604   | 0.01 | C_unshiu_00018 | 726156 | 723553 | 2604   | 0.31  | 99.96 |
| chr3 | 2204362 | 2242679 | 38318  | 0.14 | C_unshiu_00018 | 720702 | 682378 | 38325  | 4.5   | 99.54 |
| chr3 | 2232688 | 2248666 | 15979  | 0.06 | C_unshiu_00018 | 692355 | 676399 | 15957  | 1.87  | 99.06 |
| chr3 | 2248455 | 2251567 | 3113   | 0.01 | C_unshiu_00018 | 676399 | 673279 | 3121   | 0.37  | 99.14 |
| chr3 | 2252568 | 2267120 | 14553  | 0.05 | C_unshiu_00018 | 673286 | 658711 | 14576  | 1.71  | 99.15 |
| chr3 | 2267128 | 2279828 | 12701  | 0.05 | C_unshiu_00018 | 658444 | 645730 | 12715  | 1.49  | 99.52 |
| chr3 | 2279825 | 2325711 | 45887  | 0.17 | C_unshiu_00018 | 645573 | 599671 | 45903  | 5.39  | 99.36 |
| chr3 | 2328394 | 2345136 | 16743  | 0.06 | C_unshiu_00018 | 599679 | 582937 | 16743  | 1.96  | 99.39 |
| chr3 | 2345097 | 2358360 | 13264  | 0.05 | C_unshiu_00018 | 583076 | 569885 | 13192  | 1.55  | 98.96 |
| chr3 | 2360983 | 2374360 | 13378  | 0.05 | C_unshiu_00018 | 566769 | 553325 | 13445  | 1.58  | 99.06 |
| chr3 | 2374352 | 2384990 | 10639  | 0.04 | C_unshiu_00018 | 553253 | 542580 | 10674  | 1.25  | 99.37 |
| chr3 | 2384991 | 2428642 | 43652  | 0.16 | C_unshiu_00018 | 542618 | 498905 | 43714  | 5.13  | 99.41 |
| chr3 | 2429298 | 2459414 | 30117  | 0.11 | C_unshiu_00569 | 1849   | 32002  | 30154  | 17.27 | 99.78 |
| chr3 | 2460641 | 2569473 | 108833 | 0.39 | C_unshiu_00569 | 33717  | 142565 | 108849 | 62.34 | 99.95 |
| chr3 | 2566361 | 2581172 | 14812  | 0.05 | C_unshiu_00569 | 174619 | 159788 | 14832  | 8.49  | 99.55 |
| chr3 | 2574223 | 2590768 | 16546  | 0.06 | C_unshiu_00960 | 1      | 16517  | 16517  | 14.93 | 99.78 |
| chr3 | 2595542 | 2600885 | 5344   | 0.02 | C_unshiu_00960 | 22634  | 27977  | 5344   | 4.83  | 99.31 |
| chr3 | 2605873 | 2626662 | 20790  | 0.08 | C_unshiu_00960 | 40311  | 61105  | 20795  | 18.79 | 99.91 |
| chr3 | 2630715 | 2676693 | 45979  | 0.17 | C_unshiu_00960 | 64762  | 110653 | 45892  | 41.47 | 99.58 |
| chr3 | 2668514 | 2701120 | 32607  | 0.12 | C_unshiu_00729 | 138687 | 106079 | 32609  | 23.51 | 99.9  |
| chr3 | 2681128 | 2779429 | 98302  | 0.36 | C_unshiu_00729 | 126068 | 27770  | 98299  | 70.88 | 99.97 |
| chr3 | 2779643 | 2790793 | 11151  | 0.04 | C_unshiu_00729 | 27522  | 16373  | 11150  | 8.04  | 99.79 |
| chr3 | 2813516 | 2822599 | 9084   | 0.03 | C_unshiu_00514 | 174898 | 165815 | 9084   | 4.86  | 100   |
| chr3 | 2827485 | 2828734 | 1250   | 0    | C_unshiu_00514 | 161753 | 160504 | 1250   | 0.67  | 100   |
| chr3 | 2829967 | 2850844 | 20878  | 0.08 | C_unshiu_00514 | 158856 | 137999 | 20858  | 11.16 | 99.9  |
| chr3 | 2848556 | 2855045 | 6490   | 0.02 | C_unshiu_01409 | 63606  | 70095  | 6490   | 9.26  | 100   |
| chr3 | 2853236 | 2884887 | 31652  | 0.11 | C_unshiu_00514 | 131277 | 99600  | 31678  | 16.95 | 99.9  |
| chr3 | 2864910 | 2886180 | 21271  | 0.08 | C_unshiu_00514 | 119603 | 98307  | 21297  | 11.4  | 99.88 |
| chr3 | 2886281 | 2895671 | 9391   | 0.03 | C_unshiu_02337 | 4325   | 13717  | 9393   | 32.68 | 99.62 |
| chr3 | 2898019 | 2901335 | 3317   | 0.01 | C_unshiu_01189 | 64160  | 60844  | 3317   | 3.84  | 100   |
| chr3 | 2901328 | 2910309 | 8982   | 0.03 | C_unshiu_02337 | 19050  | 28032  | 8983   | 31.25 | 99.19 |
| chr3 | 2923317 | 2925202 | 1886   | 0.01 | C_unshiu_01207 | 73067  | 71182  | 1886   | 2.22  | 99.63 |
| chr3 | 2929667 | 2948079 | 18413  | 0.07 | C_unshiu_01207 | 71191  | 52803  | 18389  | 21.69 | 99.36 |
| chr3 | 2956331 | 2964342 | 8012   | 0.03 | C_unshiu_01207 | 45235  | 37252  | 7984   | 9.42  | 98.01 |
| chr3 | 2968761 | 2979590 | 10830  | 0.04 | C_unshiu_00060 | 279072 | 268242 | 10831  | 1.87  | 99.9  |
| chr3 | 2987653 | 3008942 | 21290  | 0.08 | C_unshiu_00026 | 537067 | 515774 | 21294  | 2.83  | 99.74 |

|      |         |         |        |      |                |        |        |        |       |       |
|------|---------|---------|--------|------|----------------|--------|--------|--------|-------|-------|
| chr3 | 3009409 | 3029425 | 20017  | 0.07 | C_unshiu_00026 | 515783 | 495684 | 20100  | 2.67  | 99.42 |
| chr3 | 3029663 | 3046367 | 16705  | 0.06 | C_unshiu_00026 | 495467 | 478657 | 16811  | 2.23  | 98.7  |
| chr3 | 3047007 | 3050978 | 3972   | 0.01 | C_unshiu_00026 | 478664 | 474693 | 3972   | 0.53  | 99.92 |
| chr3 | 3055335 | 3060715 | 5381   | 0.02 | C_unshiu_00026 | 467122 | 461736 | 5387   | 0.71  | 99.5  |
| chr3 | 3060389 | 3162341 | 101953 | 0.37 | C_unshiu_00026 | 461735 | 359766 | 101970 | 13.53 | 99.6  |
| chr3 | 3162897 | 3172664 | 9768   | 0.04 | C_unshiu_00026 | 353544 | 343791 | 9754   | 1.29  | 99.19 |
| chr3 | 3172655 | 3196998 | 24344  | 0.09 | C_unshiu_00026 | 343300 | 318791 | 24510  | 3.25  | 98.46 |
| chr3 | 3204174 | 3234093 | 29920  | 0.11 | C_unshiu_00026 | 315792 | 285827 | 29966  | 3.98  | 98.47 |
| chr3 | 3234415 | 3235806 | 1392   | 0.01 | C_unshiu_00026 | 285146 | 283752 | 1395   | 0.19  | 99    |
| chr3 | 3235851 | 3261034 | 25184  | 0.09 | C_unshiu_00026 | 283391 | 258217 | 25175  | 3.34  | 99.05 |
| chr3 | 3267364 | 3309481 | 42118  | 0.15 | C_unshiu_00018 | 74203  | 116281 | 42079  | 4.94  | 99.07 |
| chr3 | 3309473 | 3322113 | 12641  | 0.05 | C_unshiu_00018 | 117140 | 129807 | 12668  | 1.49  | 98.84 |
| chr3 | 3322322 | 3370972 | 48651  | 0.18 | C_unshiu_00018 | 129792 | 178467 | 48676  | 5.71  | 99.07 |
| chr3 | 3373421 | 3374725 | 1305   | 0    | C_unshiu_00018 | 180209 | 181504 | 1296   | 0.15  | 98.62 |
| chr3 | 3374725 | 3389719 | 14995  | 0.05 | C_unshiu_00018 | 182003 | 197064 | 15062  | 1.77  | 99.04 |
| chr3 | 3410059 | 3419406 | 9348   | 0.03 | C_unshiu_00018 | 219847 | 229195 | 9349   | 1.1   | 99.8  |
| chr3 | 3419268 | 3426218 | 6951   | 0.03 | C_unshiu_00018 | 229192 | 236129 | 6938   | 0.81  | 99.2  |
| chr3 | 3426732 | 3430121 | 3390   | 0.01 | C_unshiu_00018 | 236125 | 239518 | 3394   | 0.4   | 99.21 |
| chr3 | 3430985 | 3473330 | 42346  | 0.15 | C_unshiu_00018 | 239516 | 282000 | 42485  | 4.99  | 99.03 |
| chr3 | 3489947 | 3493600 | 3654   | 0.01 | C_unshiu_00018 | 299180 | 302832 | 3653   | 0.43  | 98.69 |
| chr3 | 3493600 | 3524041 | 30442  | 0.11 | C_unshiu_00018 | 303746 | 334250 | 30505  | 3.58  | 99.42 |
| chr3 | 3525416 | 3534621 | 9206   | 0.03 | C_unshiu_00018 | 336480 | 345615 | 9136   | 1.07  | 98.84 |
| chr3 | 3535500 | 3540050 | 4551   | 0.02 | C_unshiu_01382 | 28478  | 23928  | 4551   | 6.37  | 100   |
| chr3 | 3551354 | 3557526 | 6173   | 0.02 | C_unshiu_01071 | 77456  | 71284  | 6173   | 6.25  | 100   |
| chr3 | 3557521 | 3571229 | 13709  | 0.05 | C_unshiu_00018 | 370145 | 383874 | 13730  | 1.61  | 99.61 |
| chr3 | 3571505 | 3586642 | 15138  | 0.05 | C_unshiu_00018 | 384233 | 399373 | 15141  | 1.78  | 99.79 |
| chr3 | 3586638 | 3591968 | 5331   | 0.02 | C_unshiu_01802 | 27188  | 32518  | 5331   | 11.01 | 100   |
| chr3 | 3593878 | 3596629 | 2752   | 0.01 | C_unshiu_00018 | 405671 | 408421 | 2751   | 0.32  | 99.78 |
| chr3 | 3599002 | 3611889 | 12888  | 0.05 | C_unshiu_00018 | 409329 | 422145 | 12817  | 1.5   | 98.14 |
| chr3 | 3608304 | 3627884 | 19581  | 0.07 | C_unshiu_00018 | 435391 | 454971 | 19581  | 2.3   | 98.45 |
| chr3 | 3627878 | 3647503 | 19626  | 0.07 | C_unshiu_00018 | 455241 | 474991 | 19751  | 2.32  | 98.7  |
| chr3 | 3647942 | 3658100 | 10159  | 0.04 | C_unshiu_00018 | 475142 | 485322 | 10181  | 1.19  | 99.23 |
| chr3 | 3658469 | 3668806 | 10338  | 0.04 | C_unshiu_00018 | 488489 | 498811 | 10323  | 1.21  | 99.06 |
| chr3 | 3678476 | 3685592 | 7117   | 0.03 | C_unshiu_00217 | 258955 | 266009 | 7055   | 2.2   | 98.72 |
| chr3 | 3686549 | 3688190 | 1642   | 0.01 | C_unshiu_00217 | 252133 | 253784 | 1652   | 0.52  | 98.67 |
| chr3 | 3691999 | 3693924 | 1926   | 0.01 | C_unshiu_00217 | 256163 | 258091 | 1929   | 0.6   | 99.48 |
| chr3 | 3691999 | 3693924 | 1926   | 0.01 | C_unshiu_00217 | 279215 | 281166 | 1952   | 0.61  | 98.11 |
| chr3 | 3694336 | 3698132 | 3797   | 0.01 | C_unshiu_00217 | 282012 | 285808 | 3797   | 1.19  | 100   |
| chr3 | 3700125 | 3717761 | 17637  | 0.06 | C_unshiu_00217 | 286175 | 303878 | 17704  | 5.53  | 98.85 |
| chr3 | 3717851 | 3720883 | 3033   | 0.01 | C_unshiu_00217 | 304260 | 307292 | 3033   | 0.95  | 99.87 |
| chr3 | 3720947 | 3724260 | 3314   | 0.01 | C_unshiu_00217 | 307833 | 311146 | 3314   | 1.03  | 99.97 |
| chr3 | 3724383 | 3727774 | 3392   | 0.01 | C_unshiu_02167 | 27528  | 24139  | 3390   | 9.83  | 99.53 |
| chr3 | 3727760 | 3729226 | 1467   | 0.01 | C_unshiu_02167 | 23783  | 22317  | 1467   | 4.25  | 99.32 |
| chr3 | 3746333 | 3760396 | 14064  | 0.05 | C_unshiu_01010 | 104865 | 90859  | 14007  | 13.36 | 98.62 |
| chr3 | 3763085 | 3778509 | 15425  | 0.06 | C_unshiu_00330 | 252238 | 236777 | 15462  | 6.13  | 98.41 |
| chr3 | 3780988 | 3788447 | 7460   | 0.03 | C_unshiu_00330 | 232296 | 224831 | 7466   | 2.96  | 98.3  |
| chr3 | 3788487 | 3793226 | 4740   | 0.02 | C_unshiu_00330 | 224407 | 219660 | 4748   | 1.88  | 99.45 |
| chr3 | 3793227 | 3795919 | 2693   | 0.01 | C_unshiu_00330 | 219756 | 217060 | 2697   | 1.07  | 98.08 |
| chr3 | 3795906 | 3807160 | 11255  | 0.04 | C_unshiu_00330 | 217026 | 205689 | 11338  | 4.49  | 98.11 |
| chr3 | 3853291 | 3855147 | 1857   | 0.01 | C_unshiu_00330 | 161530 | 159682 | 1849   | 0.73  | 99.25 |
| chr3 | 3875094 | 3878098 | 3005   | 0.01 | C_unshiu_00330 | 141204 | 138222 | 2983   | 1.18  | 98.67 |
| chr3 | 3878103 | 3885874 | 7772   | 0.03 | C_unshiu_00330 | 137903 | 130129 | 7775   | 3.08  | 99.56 |
| chr3 | 3926771 | 3932227 | 5457   | 0.02 | C_unshiu_00330 | 89123  | 83627  | 5497   | 2.18  | 98.93 |
| chr3 | 3933741 | 3938692 | 4952   | 0.02 | C_unshiu_00330 | 82755  | 77803  | 4953   | 1.96  | 99.43 |
| chr3 | 3944000 | 3946120 | 2121   | 0.01 | C_unshiu_00330 | 72084  | 69950  | 2135   | 0.85  | 99.3  |
| chr3 | 3953616 | 3955697 | 2082   | 0.01 | C_unshiu_00330 | 69445  | 67363  | 2083   | 0.83  | 99.33 |
| chr3 | 3972241 | 3973585 | 1345   | 0    | C_unshiu_00330 | 51188  | 49841  | 1348   | 0.53  | 99.33 |
| chr3 | 3996231 | 4013081 | 16851  | 0.06 | C_unshiu_00330 | 40273  | 23411  | 16863  | 6.69  | 98.1  |
| chr3 | 4019572 | 4025882 | 6311   | 0.02 | C_unshiu_00330 | 16293  | 9948   | 6346   | 2.52  | 98    |
| chr3 | 4026432 | 4029872 | 3441   | 0.01 | C_unshiu_01091 | 38520  | 35089  | 3432   | 3.54  | 98.12 |
| chr3 | 4028220 | 4030120 | 1901   | 0.01 | C_unshiu_00330 | 7834   | 5928   | 1907   | 0.76  | 98.74 |
| chr3 | 4030438 | 4034885 | 4448   | 0.02 | C_unshiu_01091 | 45512  | 49950  | 4439   | 4.58  | 98.88 |
| chr3 | 4053373 | 4074850 | 21478  | 0.08 | C_unshiu_01091 | 67745  | 89410  | 21666  | 22.35 | 98.17 |
| chr3 | 4074868 | 4081724 | 6857   | 0.02 | C_unshiu_01091 | 90074  | 96943  | 6870   | 7.09  | 99.48 |
| chr3 | 4088930 | 4109142 | 20213  | 0.07 | C_unshiu_01525 | 59969  | 39761  | 20209  | 32.64 | 98.74 |
| chr3 | 4109435 | 4119435 | 10001  | 0.04 | C_unshiu_01525 | 39016  | 29045  | 9972   | 16.1  | 98.77 |
| chr3 | 4120590 | 4146341 | 25752  | 0.09 | C_unshiu_01525 | 28252  | 2442   | 25811  | 41.68 | 98.37 |
| chr3 | 4151436 | 4152566 | 1131   | 0    | C_unshiu_02236 | 5190   | 6310   | 1121   | 3.49  | 98.5  |
| chr3 | 4154044 | 4157968 | 3925   | 0.01 | C_unshiu_02236 | 8050   | 11974  | 3925   | 12.23 | 99.9  |
| chr3 | 4158339 | 4170739 | 12401  | 0.04 | C_unshiu_02236 | 13373  | 25796  | 12424  | 38.71 | 98.08 |
| chr3 | 4170727 | 4177003 | 6277   | 0.02 | C_unshiu_02236 | 25825  | 32096  | 6272   | 19.54 | 98.84 |
| chr3 | 4171879 | 4179880 | 8002   | 0.03 | C_unshiu_00069 | 523538 | 515529 | 8010   | 1.53  | 98.33 |
| chr3 | 4190067 | 4203004 | 12938  | 0.05 | C_unshiu_00069 | 504451 | 491505 | 12947  | 2.47  | 98.91 |
| chr3 | 4203630 | 4208436 | 4807   | 0.02 | C_unshiu_00069 | 490419 | 485620 | 4800   | 0.92  | 98.43 |
| chr3 | 4223789 | 4239580 | 15792  | 0.06 | C_unshiu_00069 | 472777 | 456948 | 15830  | 3.02  | 98.62 |
| chr3 | 4243974 | 4246039 | 2066   | 0.01 | C_unshiu_02801 | 15799  | 17864  | 2066   | 11.57 | 99.81 |
| chr3 | 4282175 | 4283605 | 1431   | 0.01 | C_unshiu_00069 | 425789 | 424358 | 1432   | 0.27  | 99.93 |
| chr3 | 4287985 | 4295443 | 7459   | 0.03 | C_unshiu_00069 | 421764 | 414294 | 7471   | 1.43  | 98.3  |
| chr3 | 4302505 | 4305335 | 2831   | 0.01 | C_unshiu_01984 | 5168   | 8003   | 2836   | 6.9   | 98.18 |

|      |         |         |       |      |                |        |        |       |       |       |
|------|---------|---------|-------|------|----------------|--------|--------|-------|-------|-------|
| chr3 | 4331708 | 4335680 | 3973  | 0.01 | C_unshiu_00069 | 372980 | 369019 | 3962  | 0.76  | 98.39 |
| chr3 | 4334876 | 4336071 | 1196  | 0    | C_unshiu_01984 | 34397  | 35590  | 1194  | 2.9   | 99.33 |
| chr3 | 4337256 | 4348823 | 11568 | 0.04 | C_unshiu_00069 | 369028 | 357466 | 11563 | 2.21  | 99.08 |
| chr3 | 4381872 | 4395940 | 14069 | 0.05 | C_unshiu_00069 | 327795 | 313697 | 14099 | 2.69  | 98.18 |
| chr3 | 4397757 | 4408683 | 10927 | 0.04 | C_unshiu_00069 | 311388 | 300432 | 10957 | 2.09  | 98.82 |
| chr3 | 4415143 | 4418960 | 3818  | 0.01 | C_unshiu_00069 | 293472 | 289624 | 3849  | 0.74  | 98.13 |
| chr3 | 4418957 | 4424811 | 5855  | 0.02 | C_unshiu_00069 | 289387 | 283566 | 5822  | 1.11  | 98.09 |
| chr3 | 4426990 | 4431044 | 4055  | 0.01 | C_unshiu_00069 | 282469 | 278386 | 4084  | 0.78  | 98.09 |
| chr3 | 4438068 | 4449163 | 11096 | 0.04 | C_unshiu_00069 | 271940 | 260803 | 11138 | 2.13  | 98.65 |
| chr3 | 4449350 | 4494209 | 44860 | 0.16 | C_unshiu_00069 | 253955 | 208954 | 45002 | 8.6   | 98.52 |
| chr3 | 4510536 | 4517936 | 7401  | 0.03 | C_unshiu_00069 | 184699 | 177276 | 7424  | 1.42  | 98.66 |
| chr3 | 4518898 | 4526507 | 7610  | 0.03 | C_unshiu_00069 | 176809 | 169214 | 7596  | 1.45  | 99.19 |
| chr3 | 4527299 | 4531507 | 4209  | 0.02 | C_unshiu_00069 | 169221 | 165007 | 4215  | 0.81  | 98.08 |
| chr3 | 4542482 | 4548677 | 6196  | 0.02 | C_unshiu_00069 | 143970 | 137783 | 6188  | 1.18  | 99.23 |
| chr3 | 4553634 | 4566708 | 13075 | 0.05 | C_unshiu_00069 | 134888 | 121705 | 13184 | 2.52  | 98.42 |
| chr3 | 4570265 | 4578078 | 7814  | 0.03 | C_unshiu_00069 | 117056 | 109215 | 7842  | 1.5   | 98.63 |
| chr3 | 4586176 | 4588959 | 2784  | 0.01 | C_unshiu_00069 | 104712 | 101930 | 2783  | 0.53  | 99.96 |
| chr3 | 4607360 | 4609134 | 1775  | 0.01 | C_unshiu_02089 | 10984  | 9204   | 1781  | 4.81  | 99.05 |
| chr3 | 4624283 | 4643646 | 19364 | 0.07 | C_unshiu_00069 | 66921  | 47379  | 19543 | 3.73  | 98.14 |
| chr3 | 4644480 | 4656594 | 12115 | 0.04 | C_unshiu_00069 | 46266  | 34196  | 12071 | 2.31  | 98.88 |
| chr3 | 4661051 | 4664511 | 3461  | 0.01 | C_unshiu_00069 | 28901  | 25434  | 3468  | 0.66  | 99.11 |
| chr3 | 4664549 | 4671520 | 6972  | 0.03 | C_unshiu_00817 | 123687 | 116711 | 6977  | 5.5   | 99.01 |
| chr3 | 4672024 | 4676225 | 4202  | 0.02 | C_unshiu_00069 | 19075  | 14874  | 4202  | 0.8   | 100   |
| chr3 | 4682684 | 4685845 | 3162  | 0.01 | C_unshiu_00817 | 110497 | 107341 | 3157  | 2.49  | 98.96 |
| chr3 | 4685904 | 4689144 | 3241  | 0.01 | C_unshiu_00069 | 3244   | 1      | 3244  | 0.62  | 99.54 |
| chr3 | 4687925 | 4705683 | 17759 | 0.06 | C_unshiu_00817 | 107578 | 89735  | 17844 | 14.08 | 98.05 |
| chr3 | 4725389 | 4726697 | 1309  | 0    | C_unshiu_00817 | 69070  | 67758  | 1313  | 1.04  | 98.63 |
| chr3 | 4731136 | 4737150 | 6015  | 0.02 | C_unshiu_00817 | 64055  | 58063  | 5993  | 4.73  | 98.76 |
| chr3 | 4738501 | 4747807 | 9307  | 0.03 | C_unshiu_00817 | 56242  | 46897  | 9346  | 7.37  | 99.08 |
| chr3 | 4748746 | 4750717 | 1972  | 0.01 | C_unshiu_03130 | 4088   | 6059   | 1972  | 28.02 | 100   |
| chr3 | 4780579 | 4782818 | 2240  | 0.01 | C_unshiu_03130 | 4087   | 1848   | 2240  | 31.82 | 100   |
| chr3 | 4784399 | 4792531 | 8133  | 0.03 | C_unshiu_00546 | 177350 | 169206 | 8145  | 4.55  | 99.18 |
| chr3 | 4793315 | 4798455 | 5141  | 0.02 | C_unshiu_00546 | 168105 | 162946 | 5160  | 2.88  | 98.62 |
| chr3 | 4819662 | 4822122 | 2461  | 0.01 | C_unshiu_00546 | 141340 | 138881 | 2460  | 1.37  | 99.47 |
| chr3 | 4827781 | 4835725 | 7945  | 0.03 | C_unshiu_00546 | 132190 | 124176 | 8015  | 4.47  | 98.3  |
| chr3 | 4847833 | 4848899 | 1067  | 0    | C_unshiu_00041 | 487891 | 488956 | 1066  | 0.16  | 99.44 |
| chr3 | 4857885 | 4884901 | 27017 | 0.1  | C_unshiu_00546 | 110306 | 83177  | 27130 | 15.14 | 98.76 |
| chr3 | 4887487 | 4893849 | 6363  | 0.02 | C_unshiu_00546 | 80334  | 73953  | 6382  | 3.56  | 98.51 |
| chr3 | 4893939 | 4896168 | 2230  | 0.01 | C_unshiu_00546 | 73385  | 71147  | 2239  | 1.25  | 98.13 |
| chr3 | 4924707 | 4926534 | 1828  | 0.01 | C_unshiu_00546 | 41121  | 39294  | 1828  | 1.02  | 100   |
| chr3 | 4927308 | 4948245 | 20938 | 0.08 | C_unshiu_00546 | 37947  | 16905  | 21043 | 11.75 | 98.85 |
| chr3 | 4949020 | 4964771 | 15752 | 0.06 | C_unshiu_00546 | 15815  | 1      | 15815 | 8.83  | 98.6  |
| chr3 | 4954227 | 4965374 | 11148 | 0.04 | C_unshiu_01004 | 104676 | 93516  | 11161 | 10.59 | 98.11 |
| chr3 | 4967897 | 5001427 | 33531 | 0.12 | C_unshiu_01004 | 92103  | 58477  | 33627 | 31.92 | 98.38 |
| chr3 | 5003766 | 5008127 | 4362  | 0.02 | C_unshiu_01004 | 55965  | 51592  | 4374  | 4.15  | 98.04 |
| chr3 | 5017908 | 5025014 | 7107  | 0.03 | C_unshiu_01004 | 43173  | 36061  | 7113  | 6.75  | 98.67 |
| chr3 | 5028423 | 5032712 | 4290  | 0.02 | C_unshiu_01004 | 32393  | 28097  | 4297  | 4.08  | 99.19 |
| chr3 | 5032596 | 5043369 | 10774 | 0.04 | C_unshiu_01004 | 28105  | 17359  | 10747 | 10.2  | 99.42 |
| chr3 | 5043657 | 5044961 | 1305  | 0    | C_unshiu_01004 | 16751  | 15444  | 1308  | 1.24  | 98.62 |
| chr3 | 5060444 | 5062520 | 2077  | 0.01 | C_unshiu_00326 | 14328  | 16390  | 2063  | 0.81  | 98.8  |
| chr3 | 5063960 | 5066299 | 2340  | 0.01 | C_unshiu_00326 | 17652  | 20013  | 2362  | 0.93  | 98.14 |
| chr3 | 5066465 | 5072311 | 5847  | 0.02 | C_unshiu_00326 | 20877  | 26726  | 5850  | 2.3   | 99.2  |
| chr3 | 5079945 | 5081454 | 1510  | 0.01 | C_unshiu_00326 | 34575  | 36085  | 1511  | 0.59  | 98.81 |
| chr3 | 5080033 | 5085866 | 5834  | 0.02 | C_unshiu_02979 | 5841   | 11654  | 5814  | 43.12 | 98.56 |
| chr3 | 5111603 | 5124834 | 13232 | 0.05 | C_unshiu_00326 | 63341  | 76607  | 13267 | 5.22  | 98.4  |
| chr3 | 5125555 | 5133405 | 7851  | 0.03 | C_unshiu_00326 | 76606  | 84527  | 7922  | 3.12  | 98.22 |
| chr3 | 5134707 | 5137692 | 2986  | 0.01 | C_unshiu_00326 | 85960  | 88956  | 2997  | 1.18  | 98.6  |
| chr3 | 5157123 | 5172791 | 15669 | 0.06 | C_unshiu_00326 | 107273 | 122940 | 15668 | 6.16  | 98.45 |
| chr3 | 5172792 | 5179558 | 6767  | 0.02 | C_unshiu_00966 | 70004  | 76770  | 6767  | 6.14  | 100   |
| chr3 | 5172797 | 5179793 | 6997  | 0.03 | C_unshiu_00263 | 213904 | 206908 | 6997  | 2.46  | 100   |
| chr3 | 5184103 | 5185106 | 1004  | 0    | C_unshiu_00157 | 137248 | 136245 | 1004  | 0.27  | 100   |
| chr3 | 5187529 | 5189383 | 1855  | 0.01 | C_unshiu_00326 | 137208 | 139064 | 1857  | 0.73  | 99.73 |
| chr3 | 5198503 | 5203193 | 4691  | 0.02 | C_unshiu_00326 | 139616 | 144308 | 4693  | 1.85  | 99.79 |
| chr3 | 5272754 | 5280768 | 8015  | 0.03 | C_unshiu_00326 | 212998 | 221019 | 8022  | 3.15  | 99.39 |
| chr3 | 5289912 | 5297667 | 7756  | 0.03 | C_unshiu_00326 | 227884 | 235655 | 7772  | 3.06  | 98.01 |
| chr3 | 5303995 | 5308351 | 4357  | 0.02 | C_unshiu_00326 | 240080 | 244439 | 4360  | 1.71  | 98.06 |
| chr3 | 5308362 | 5310214 | 1853  | 0.01 | C_unshiu_00326 | 247490 | 249345 | 1856  | 0.73  | 98.39 |
| chr3 | 5316246 | 5321486 | 5241  | 0.02 | C_unshiu_00662 | 153311 | 148035 | 5277  | 3.44  | 98.45 |
| chr3 | 5342477 | 5356391 | 13915 | 0.05 | C_unshiu_00662 | 129124 | 115249 | 13876 | 9.05  | 98.52 |
| chr3 | 5362190 | 5368230 | 6041  | 0.02 | C_unshiu_00662 | 112024 | 106006 | 6019  | 3.93  | 99.01 |
| chr3 | 5368608 | 5372362 | 3755  | 0.01 | C_unshiu_00662 | 104330 | 100576 | 3755  | 2.45  | 100   |
| chr3 | 5385610 | 5390661 | 5052  | 0.02 | C_unshiu_00662 | 86731  | 81660  | 5072  | 3.31  | 98.8  |
| chr3 | 5390679 | 5392413 | 1735  | 0.01 | C_unshiu_00662 | 81713  | 79979  | 1735  | 1.13  | 99.48 |
| chr3 | 5394161 | 5408093 | 13933 | 0.05 | C_unshiu_00662 | 77554  | 63652  | 13903 | 9.07  | 98.93 |
| chr3 | 5407279 | 5415627 | 8349  | 0.03 | C_unshiu_00662 | 62266  | 53866  | 8401  | 5.48  | 98.54 |
| chr3 | 5438824 | 5447703 | 8880  | 0.03 | C_unshiu_00662 | 33932  | 24990  | 8943  | 5.83  | 99.04 |
| chr3 | 5450154 | 5456801 | 6648  | 0.02 | C_unshiu_00662 | 22341  | 15662  | 6680  | 4.36  | 98.1  |
| chr3 | 5502142 | 5516430 | 14289 | 0.05 | C_unshiu_00139 | 143847 | 129452 | 14396 | 3.57  | 98.76 |
| chr3 | 5516437 | 5521013 | 4577  | 0.02 | C_unshiu_00139 | 128541 | 123961 | 4581  | 1.14  | 98.13 |

|      |         |         |       |      |                |        |        |       |       |       |
|------|---------|---------|-------|------|----------------|--------|--------|-------|-------|-------|
| chr3 | 5522021 | 5537718 | 15698 | 0.06 | C_unshiu_00139 | 122355 | 106599 | 15757 | 3.91  | 98.74 |
| chr3 | 5560738 | 5576616 | 15879 | 0.06 | C_unshiu_00139 | 84127  | 68152  | 15976 | 3.96  | 98.05 |
| chr3 | 5591534 | 5603269 | 11736 | 0.04 | C_unshiu_00139 | 51709  | 39958  | 11752 | 2.91  | 98.63 |
| chr3 | 5618559 | 5624045 | 5487  | 0.02 | C_unshiu_00898 | 62103  | 67585  | 5483  | 4.68  | 98.67 |
| chr3 | 5622227 | 5626325 | 4099  | 0.01 | C_unshiu_00139 | 19183  | 15086  | 4098  | 1.02  | 99.54 |
| chr3 | 5627988 | 5631334 | 3347  | 0.01 | C_unshiu_00139 | 13569  | 10223  | 3347  | 0.83  | 99.67 |
| chr3 | 5631364 | 5634287 | 2924  | 0.01 | C_unshiu_00898 | 69596  | 72521  | 2926  | 2.5   | 98.7  |
| chr3 | 5633254 | 5635227 | 1974  | 0.01 | C_unshiu_00139 | 9057   | 7086   | 1972  | 0.49  | 99.24 |
| chr3 | 5634757 | 5637375 | 2619  | 0.01 | C_unshiu_00139 | 2621   | 1      | 2621  | 0.65  | 99.31 |
| chr3 | 5635932 | 5644025 | 8094  | 0.03 | C_unshiu_00898 | 72513  | 80644  | 8132  | 6.94  | 98.78 |
| chr3 | 5644320 | 5646430 | 2111  | 0.01 | C_unshiu_00898 | 81337  | 83454  | 2118  | 1.81  | 99.1  |
| chr3 | 5650147 | 5654229 | 4083  | 0.01 | C_unshiu_00898 | 88147  | 92229  | 4083  | 3.48  | 100   |
| chr3 | 5654266 | 5662452 | 8187  | 0.03 | C_unshiu_00291 | 267914 | 259729 | 8186  | 3.03  | 98.86 |
| chr3 | 5664170 | 5666321 | 2152  | 0.01 | C_unshiu_00291 | 258407 | 256263 | 2145  | 0.79  | 98.47 |
| chr3 | 5669129 | 5671479 | 2351  | 0.01 | C_unshiu_00898 | 100259 | 102610 | 2352  | 2.01  | 99.91 |
| chr3 | 5685431 | 5690480 | 5050  | 0.02 | C_unshiu_00249 | 281232 | 286283 | 5052  | 1.71  | 98.42 |
| chr3 | 5690470 | 5693885 | 3416  | 0.01 | C_unshiu_00291 | 244112 | 240689 | 3424  | 1.27  | 98.92 |
| chr3 | 5708667 | 5730068 | 21402 | 0.08 | C_unshiu_00291 | 228195 | 206718 | 21478 | 7.95  | 98.29 |
| chr3 | 5731558 | 5746447 | 14890 | 0.05 | C_unshiu_00291 | 206679 | 191736 | 14944 | 5.53  | 99.37 |
| chr3 | 5752568 | 5784785 | 32218 | 0.12 | C_unshiu_00291 | 190374 | 158078 | 32297 | 11.95 | 99.52 |
| chr3 | 5784785 | 5790958 | 6174  | 0.02 | C_unshiu_00291 | 158146 | 151974 | 6173  | 2.28  | 99.72 |
| chr3 | 5790972 | 5802344 | 11373 | 0.04 | C_unshiu_00291 | 151800 | 140413 | 11388 | 4.21  | 99.68 |
| chr3 | 5806878 | 5814491 | 7614  | 0.03 | C_unshiu_00291 | 140396 | 132794 | 7603  | 2.81  | 98.78 |
| chr3 | 5819494 | 5843269 | 23776 | 0.09 | C_unshiu_00291 | 125683 | 101935 | 23749 | 8.79  | 99.69 |
| chr3 | 5843258 | 5880189 | 36932 | 0.13 | C_unshiu_00291 | 101908 | 64905  | 37004 | 13.69 | 99.22 |
| chr3 | 5883969 | 5896913 | 12945 | 0.05 | C_unshiu_00291 | 61910  | 48942  | 12969 | 4.8   | 99.55 |
| chr3 | 5900721 | 5909423 | 8703  | 0.03 | C_unshiu_00291 | 46144  | 37435  | 8710  | 3.22  | 99.85 |
| chr3 | 5910855 | 5930139 | 19285 | 0.07 | C_unshiu_00291 | 37320  | 18008  | 19313 | 7.15  | 99.73 |
| chr3 | 5931391 | 5940747 | 9357  | 0.03 | C_unshiu_00291 | 18040  | 8737   | 9304  | 3.44  | 98.65 |
| chr3 | 5941591 | 5948629 | 7039  | 0.03 | C_unshiu_00291 | 7400   | 381    | 7020  | 2.6   | 99.3  |
| chr3 | 5962641 | 5965703 | 3063  | 0.01 | C_unshiu_00627 | 56856  | 53797  | 3060  | 1.9   | 99.35 |
| chr3 | 5969311 | 5973463 | 4153  | 0.02 | C_unshiu_00627 | 37840  | 33679  | 4162  | 2.58  | 99.07 |
| chr3 | 5973476 | 5977910 | 4435  | 0.02 | C_unshiu_00627 | 42306  | 37871  | 4436  | 2.76  | 99.89 |
| chr3 | 5977720 | 6000268 | 22549 | 0.08 | C_unshiu_00627 | 30838  | 8259   | 22580 | 14.02 | 99.44 |
| chr3 | 6041235 | 6053326 | 12092 | 0.04 | C_unshiu_00217 | 222578 | 210424 | 12155 | 3.8   | 98.66 |
| chr3 | 6071661 | 6078489 | 6829  | 0.02 | C_unshiu_00217 | 191310 | 184442 | 6869  | 2.14  | 98.85 |
| chr3 | 6078470 | 6112039 | 33570 | 0.12 | C_unshiu_00217 | 184113 | 150536 | 33578 | 10.49 | 98.93 |
| chr3 | 6113254 | 6128959 | 15706 | 0.06 | C_unshiu_00217 | 150496 | 134746 | 15751 | 4.92  | 98.34 |
| chr3 | 6132384 | 6140808 | 8425  | 0.03 | C_unshiu_00217 | 131486 | 123042 | 8445  | 2.64  | 98.01 |
| chr3 | 6150153 | 6153762 | 3610  | 0.01 | C_unshiu_00217 | 112770 | 109160 | 3611  | 1.13  | 99.53 |
| chr3 | 6153828 | 6155499 | 1672  | 0.01 | C_unshiu_01534 | 61344  | 59687  | 1658  | 2.7   | 98.51 |
| chr3 | 6174317 | 6184091 | 9775  | 0.04 | C_unshiu_00217 | 92244  | 82472  | 9773  | 3.05  | 98.99 |
| chr3 | 6276979 | 6278004 | 1026  | 0    | C_unshiu_01051 | 21094  | 22118  | 1025  | 1.03  | 99.03 |
| chr3 | 6282928 | 6284874 | 1947  | 0.01 | C_unshiu_01051 | 23112  | 25058  | 1947  | 1.95  | 100   |
| chr3 | 6287891 | 6297992 | 10102 | 0.04 | C_unshiu_01051 | 31220  | 41322  | 10103 | 10.11 | 98.53 |
| chr3 | 6307050 | 6310618 | 3569  | 0.01 | C_unshiu_01051 | 50892  | 54478  | 3587  | 3.59  | 98.91 |
| chr3 | 6328592 | 6332178 | 3587  | 0.01 | C_unshiu_01051 | 72628  | 76215  | 3588  | 3.59  | 98.89 |
| chr3 | 6333719 | 6343325 | 9607  | 0.03 | C_unshiu_01051 | 76274  | 85895  | 9622  | 9.63  | 98.62 |
| chr3 | 6359354 | 6361110 | 1757  | 0.01 | C_unshiu_01051 | 98152  | 99916  | 1765  | 1.77  | 98.81 |
| chr3 | 6363784 | 6376577 | 12794 | 0.05 | C_unshiu_00922 | 39962  | 27124  | 12839 | 11.22 | 98.35 |
| chr3 | 6383831 | 6392577 | 8747  | 0.03 | C_unshiu_00869 | 1      | 8792   | 8792  | 7.29  | 98.23 |
| chr3 | 6395833 | 6434780 | 38948 | 0.14 | C_unshiu_00869 | 9064   | 48051  | 38988 | 32.33 | 98.25 |
| chr3 | 6434806 | 6441874 | 7069  | 0.03 | C_unshiu_00805 | 122041 | 114965 | 7077  | 5.54  | 98.59 |
| chr3 | 6460870 | 6467125 | 6256  | 0.02 | C_unshiu_00869 | 69232  | 75459  | 6228  | 5.16  | 98.31 |
| chr3 | 6531533 | 6536796 | 5264  | 0.02 | C_unshiu_01661 | 49255  | 54524  | 5270  | 9.67  | 99.58 |
| chr3 | 6539050 | 6542475 | 3426  | 0.01 | C_unshiu_00805 | 16417  | 12991  | 3427  | 2.68  | 98.75 |
| chr3 | 6551918 | 6556470 | 4553  | 0.02 | C_unshiu_00805 | 12182  | 7631   | 4552  | 3.56  | 99.65 |
| chr3 | 6560138 | 6561180 | 1043  | 0    | C_unshiu_00894 | 32368  | 31325  | 1044  | 0.89  | 98.85 |
| chr3 | 6571773 | 6573719 | 1947  | 0.01 | C_unshiu_00805 | 7639   | 5689   | 1951  | 1.53  | 98.92 |
| chr3 | 6587470 | 6619152 | 31683 | 0.11 | C_unshiu_00742 | 6057   | 37827  | 31771 | 23.15 | 98.89 |
| chr3 | 6619980 | 6646544 | 26565 | 0.1  | C_unshiu_00742 | 37829  | 64504  | 26676 | 19.44 | 98.77 |
| chr3 | 6674853 | 6683818 | 8966  | 0.03 | C_unshiu_00742 | 86808  | 95811  | 9004  | 6.56  | 98.62 |
| chr3 | 6689290 | 6693529 | 4240  | 0.02 | C_unshiu_00742 | 101619 | 105860 | 4242  | 3.09  | 98.89 |
| chr3 | 6695275 | 6706943 | 11669 | 0.04 | C_unshiu_00742 | 105856 | 117508 | 11653 | 8.49  | 98.48 |
| chr3 | 6705098 | 6713969 | 8872  | 0.03 | C_unshiu_00411 | 221062 | 212176 | 8887  | 4.02  | 98.94 |
| chr3 | 6714348 | 6715677 | 1330  | 0    | C_unshiu_00411 | 211980 | 210635 | 1346  | 0.61  | 98.37 |
| chr3 | 6716204 | 6719501 | 3298  | 0.01 | C_unshiu_00411 | 209938 | 206645 | 3294  | 1.49  | 98.88 |
| chr3 | 6720365 | 6721882 | 1518  | 0.01 | C_unshiu_00411 | 205061 | 203545 | 1517  | 0.69  | 98.62 |
| chr3 | 6722552 | 6723739 | 1188  | 0    | C_unshiu_00411 | 203543 | 202359 | 1185  | 0.54  | 98.16 |
| chr3 | 6723740 | 6728287 | 4548  | 0.02 | C_unshiu_00411 | 201644 | 197091 | 4554  | 2.06  | 99.14 |
| chr3 | 6729622 | 6736782 | 7161  | 0.03 | C_unshiu_00411 | 197096 | 189918 | 7179  | 3.25  | 99.05 |
| chr3 | 6746188 | 6749709 | 3522  | 0.01 | C_unshiu_00411 | 182279 | 178743 | 3537  | 1.6   | 98.98 |
| chr3 | 6777896 | 6807970 | 30075 | 0.11 | C_unshiu_00757 | 96239  | 66225  | 30015 | 22.22 | 99.45 |
| chr3 | 6808207 | 6830578 | 22372 | 0.08 | C_unshiu_00757 | 120864 | 98529  | 22336 | 16.54 | 99.76 |
| chr3 | 6831191 | 6832764 | 1574  | 0.01 | C_unshiu_01829 | 11703  | 10118  | 1586  | 3.34  | 98.61 |
| chr3 | 6834138 | 6839244 | 5107  | 0.02 | C_unshiu_01819 | 4409   | 9534   | 5126  | 10.71 | 98.46 |
| chr3 | 6839701 | 6841526 | 1826  | 0.01 | C_unshiu_01819 | 9592   | 11417  | 1826  | 3.82  | 99.95 |
| chr3 | 6847009 | 6848806 | 1798  | 0.01 | C_unshiu_00411 | 160144 | 158345 | 1800  | 0.81  | 99.89 |
| chr3 | 6855894 | 6868853 | 12960 | 0.05 | C_unshiu_00411 | 151752 | 138720 | 13033 | 5.9   | 98.34 |

|      |         |         |       |      |                |        |        |       |       |       |
|------|---------|---------|-------|------|----------------|--------|--------|-------|-------|-------|
| chr3 | 6905670 | 6909764 | 4095  | 0.01 | C_unshiu_00411 | 108386 | 104284 | 4103  | 1.86  | 98.98 |
| chr3 | 6912648 | 6924212 | 11565 | 0.04 | C_unshiu_00411 | 101998 | 90395  | 11604 | 5.25  | 98.59 |
| chr3 | 6926434 | 6944839 | 18406 | 0.07 | C_unshiu_00411 | 87854  | 69493  | 18362 | 8.31  | 98.73 |
| chr3 | 6945667 | 6970148 | 24482 | 0.09 | C_unshiu_00411 | 66403  | 41867  | 24537 | 11.1  | 98.14 |
| chr3 | 6988053 | 6993239 | 5187  | 0.02 | C_unshiu_00411 | 22831  | 17639  | 5193  | 2.35  | 99.42 |
| chr3 | 6998473 | 7006464 | 7992  | 0.03 | C_unshiu_00411 | 11622  | 3628   | 7995  | 3.62  | 99.45 |
| chr3 | 7007575 | 7012024 | 4450  | 0.02 | C_unshiu_00820 | 6635   | 11112  | 4478  | 3.54  | 98.42 |
| chr3 | 7012376 | 7016788 | 4413  | 0.02 | C_unshiu_00820 | 12814  | 17233  | 4420  | 3.5   | 99.32 |
| chr3 | 7024520 | 7031330 | 6811  | 0.02 | C_unshiu_02120 | 1      | 6813   | 6813  | 19.01 | 98.92 |
| chr3 | 7030322 | 7057434 | 27113 | 0.1  | C_unshiu_00820 | 29670  | 56857  | 27188 | 21.52 | 98.82 |
| chr3 | 7057558 | 7067908 | 10351 | 0.04 | C_unshiu_00820 | 57561  | 67892  | 10332 | 8.18  | 98.71 |
| chr3 | 7068898 | 7071075 | 2178  | 0.01 | C_unshiu_00820 | 67379  | 69563  | 2185  | 1.73  | 98.72 |
| chr3 | 7099396 | 7104669 | 5274  | 0.02 | C_unshiu_00820 | 99451  | 104736 | 5286  | 4.18  | 98.6  |
| chr3 | 7106417 | 7118240 | 11824 | 0.04 | C_unshiu_00820 | 105269 | 117110 | 11842 | 9.37  | 99.11 |
| chr3 | 7118521 | 7122875 | 4355  | 0.02 | C_unshiu_01798 | 24577  | 28950  | 4374  | 9.01  | 98.52 |
| chr3 | 7122858 | 7134256 | 11399 | 0.04 | C_unshiu_01798 | 29135  | 40584  | 11450 | 23.59 | 98.04 |
| chr3 | 7134115 | 7141142 | 7028  | 0.03 | C_unshiu_00659 | 1      | 7087   | 7087  | 4.59  | 98.62 |
| chr3 | 7144226 | 7150641 | 6416  | 0.02 | C_unshiu_00659 | 11469  | 17903  | 6435  | 4.17  | 98.19 |
| chr3 | 7152017 | 7159892 | 7876  | 0.03 | C_unshiu_00659 | 18483  | 26396  | 7914  | 5.13  | 98.01 |
| chr3 | 7159873 | 7172013 | 12141 | 0.04 | C_unshiu_00659 | 28062  | 40203  | 12142 | 7.87  | 99.07 |
| chr3 | 7172113 | 7173143 | 1031  | 0    | C_unshiu_00659 | 40326  | 41356  | 1031  | 0.67  | 99.61 |
| chr3 | 7173143 | 7191013 | 17871 | 0.06 | C_unshiu_00659 | 41724  | 59585  | 17862 | 11.58 | 99.33 |
| chr3 | 7196027 | 7198829 | 2803  | 0.01 | C_unshiu_00659 | 64440  | 67234  | 2795  | 1.81  | 99.57 |
| chr3 | 7204525 | 7205971 | 1447  | 0.01 | C_unshiu_00659 | 69768  | 71216  | 1449  | 0.94  | 99.65 |
| chr3 | 7206335 | 7226913 | 20579 | 0.07 | C_unshiu_00659 | 71952  | 92558  | 20607 | 13.36 | 98.46 |
| chr3 | 7240665 | 7249281 | 8617  | 0.03 | C_unshiu_01365 | 71519  | 62902  | 8618  | 11.75 | 98.62 |
| chr3 | 7249229 | 7253197 | 3969  | 0.01 | C_unshiu_01365 | 62900  | 58931  | 3970  | 5.41  | 99.12 |
| chr3 | 7255139 | 7256209 | 1071  | 0    | C_unshiu_00659 | 127769 | 128844 | 1076  | 0.7   | 99.16 |
| chr3 | 7276054 | 7281539 | 5486  | 0.02 | C_unshiu_00659 | 144993 | 150470 | 5478  | 3.55  | 98.13 |
| chr3 | 7283242 | 7286626 | 3385  | 0.01 | C_unshiu_00659 | 150914 | 154251 | 3338  | 2.16  | 98.05 |
| chr3 | 7286262 | 7292039 | 5778  | 0.02 | C_unshiu_00216 | 314793 | 309023 | 5771  | 1.79  | 98.82 |
| chr3 | 7297234 | 7304909 | 7676  | 0.03 | C_unshiu_00216 | 299688 | 292013 | 7676  | 2.38  | 98.92 |
| chr3 | 7309331 | 7330882 | 21552 | 0.08 | C_unshiu_00216 | 288283 | 266598 | 21686 | 6.73  | 98.23 |
| chr3 | 7343710 | 7349173 | 5464  | 0.02 | C_unshiu_00216 | 254559 | 249085 | 5475  | 1.7   | 98.92 |
| chr3 | 7349045 | 7354097 | 5053  | 0.02 | C_unshiu_00216 | 249090 | 244013 | 5078  | 1.58  | 98.62 |
| chr3 | 7354375 | 7356462 | 2088  | 0.01 | C_unshiu_00216 | 244025 | 241929 | 2097  | 0.65  | 99    |
| chr3 | 7358727 | 7369895 | 11169 | 0.04 | C_unshiu_00216 | 240304 | 229104 | 11201 | 3.48  | 98.9  |
| chr3 | 7385449 | 7390818 | 5370  | 0.02 | C_unshiu_00216 | 213106 | 207723 | 5384  | 1.67  | 98.98 |
| chr3 | 7392236 | 7412627 | 20392 | 0.07 | C_unshiu_00216 | 204879 | 184403 | 20477 | 6.36  | 98.4  |
| chr3 | 7416327 | 7417499 | 1173  | 0    | C_unshiu_00216 | 177132 | 175956 | 1177  | 0.37  | 98.22 |
| chr3 | 7430123 | 7445730 | 15608 | 0.06 | C_unshiu_00216 | 166934 | 151305 | 15630 | 4.85  | 99.16 |
| chr3 | 7445743 | 7453202 | 7460  | 0.03 | C_unshiu_00216 | 150291 | 142820 | 7472  | 2.32  | 99.01 |
| chr3 | 7453475 | 7491771 | 38297 | 0.14 | C_unshiu_00216 | 141800 | 103368 | 38433 | 11.93 | 98.64 |
| chr3 | 7498217 | 7507000 | 8784  | 0.03 | C_unshiu_00216 | 97278  | 88443  | 8836  | 2.74  | 98.26 |
| chr3 | 7507206 | 7518271 | 11066 | 0.04 | C_unshiu_00216 | 88431  | 77334  | 11098 | 3.45  | 98.38 |
| chr3 | 7528062 | 7530295 | 2234  | 0.01 | C_unshiu_00216 | 69233  | 67000  | 2234  | 0.69  | 99.51 |
| chr3 | 7530310 | 7533026 | 2717  | 0.01 | C_unshiu_00216 | 69049  | 66347  | 2703  | 0.84  | 98.46 |
| chr3 | 7533068 | 7537440 | 4373  | 0.02 | C_unshiu_00216 | 66744  | 62335  | 4410  | 1.37  | 98.44 |
| chr3 | 7537443 | 7539037 | 1595  | 0.01 | C_unshiu_00216 | 62032  | 60437  | 1596  | 0.5   | 98.87 |
| chr3 | 7539032 | 7540267 | 1236  | 0    | C_unshiu_00216 | 61164  | 59935  | 1230  | 0.38  | 98.54 |
| chr3 | 7540599 | 7543260 | 2662  | 0.01 | C_unshiu_00216 | 59934  | 57276  | 2659  | 0.83  | 99.51 |
| chr3 | 7546854 | 7548633 | 1780  | 0.01 | C_unshiu_01850 | 46465  | 44681  | 1785  | 3.84  | 98.15 |
| chr3 | 7549402 | 7552554 | 3153  | 0.01 | C_unshiu_00216 | 51673  | 48520  | 3154  | 0.98  | 99.97 |
| chr3 | 7553773 | 7560577 | 6805  | 0.02 | C_unshiu_00216 | 46845  | 40007  | 6839  | 2.12  | 99.01 |
| chr3 | 7561122 | 7562171 | 1050  | 0    | C_unshiu_01850 | 44494  | 43445  | 1050  | 2.26  | 100   |
| chr3 | 7562673 | 7571116 | 8444  | 0.03 | C_unshiu_01850 | 43057  | 34629  | 8429  | 18.14 | 98.38 |
| chr3 | 7573152 | 7576369 | 3218  | 0.01 | C_unshiu_00216 | 32497  | 29262  | 3236  | 1     | 98.27 |
| chr3 | 7579844 | 7594820 | 14977 | 0.05 | C_unshiu_01850 | 14883  | 1      | 14883 | 32.03 | 98.01 |
| chr3 | 7599736 | 7608778 | 9043  | 0.03 | C_unshiu_00386 | 162550 | 171574 | 9025  | 3.98  | 99.2  |
| chr3 | 7636249 | 7637523 | 1275  | 0    | C_unshiu_02858 | 4859   | 6136   | 1278  | 7.69  | 98.36 |
| chr3 | 7654800 | 7656350 | 1551  | 0.01 | C_unshiu_00375 | 86561  | 88108  | 1548  | 0.67  | 98    |
| chr3 | 7654800 | 7656345 | 1546  | 0.01 | C_unshiu_00571 | 15384  | 16927  | 1544  | 0.89  | 98.58 |
| chr3 | 7663216 | 7666528 | 3313  | 0.01 | C_unshiu_01228 | 73638  | 70322  | 3317  | 4.02  | 99.28 |
| chr3 | 7673490 | 7676947 | 3458  | 0.01 | C_unshiu_01228 | 63117  | 59663  | 3455  | 4.18  | 98.93 |
| chr3 | 7677618 | 7692885 | 15268 | 0.06 | C_unshiu_01228 | 57871  | 42588  | 15284 | 18.5  | 98.31 |
| chr3 | 7697387 | 7708124 | 10738 | 0.04 | C_unshiu_01228 | 35342  | 24623  | 10720 | 12.98 | 98.33 |
| chr3 | 7723945 | 7726404 | 2460  | 0.01 | C_unshiu_00400 | 6533   | 8992   | 2460  | 1.1   | 99.88 |
| chr3 | 7731601 | 7734012 | 2412  | 0.01 | C_unshiu_01228 | 2430   | 1      | 2430  | 2.94  | 98.28 |
| chr3 | 7767761 | 7770888 | 3128  | 0.01 | C_unshiu_00400 | 50257  | 53377  | 3121  | 1.4   | 99.04 |
| chr3 | 7770901 | 7772023 | 1123  | 0    | C_unshiu_00400 | 45683  | 46811  | 1129  | 0.51  | 98.76 |
| chr3 | 7784391 | 7811609 | 27219 | 0.1  | C_unshiu_00400 | 61892  | 89125  | 27234 | 12.22 | 98.89 |
| chr3 | 7812283 | 7814744 | 2462  | 0.01 | C_unshiu_00400 | 89125  | 91587  | 2463  | 1.1   | 98.5  |
| chr3 | 7822915 | 7833988 | 11074 | 0.04 | C_unshiu_00400 | 93719  | 104828 | 11110 | 4.98  | 98.6  |
| chr3 | 7835312 | 7836417 | 1106  | 0    | C_unshiu_00400 | 107201 | 108306 | 1106  | 0.5   | 99.73 |
| chr3 | 7863819 | 7874227 | 10409 | 0.04 | C_unshiu_00400 | 136588 | 147036 | 10449 | 4.69  | 98.98 |
| chr3 | 7877014 | 7884370 | 7357  | 0.03 | C_unshiu_00400 | 149003 | 156384 | 7382  | 3.31  | 98.61 |
| chr3 | 7889021 | 7894755 | 5735  | 0.02 | C_unshiu_00400 | 160177 | 165926 | 5750  | 2.58  | 99.04 |
| chr3 | 7900040 | 7901823 | 1784  | 0.01 | C_unshiu_01099 | 25829  | 27612  | 1784  | 1.86  | 100   |
| chr3 | 7901824 | 7906280 | 4457  | 0.02 | C_unshiu_00400 | 171219 | 175715 | 4497  | 2.02  | 98.44 |

|      |         |         |       |      |                |        |        |       |       |       |
|------|---------|---------|-------|------|----------------|--------|--------|-------|-------|-------|
| chr3 | 7907303 | 7912402 | 5100  | 0.02 | C_unshiu_00400 | 175668 | 180789 | 5122  | 2.3   | 99    |
| chr3 | 7921476 | 7926151 | 4676  | 0.02 | C_unshiu_00400 | 189805 | 194504 | 4700  | 2.11  | 98.98 |
| chr3 | 7929796 | 7932741 | 2946  | 0.01 | C_unshiu_00400 | 198551 | 201496 | 2946  | 1.32  | 99.93 |
| chr3 | 7941711 | 7951823 | 10113 | 0.04 | C_unshiu_01241 | 71351  | 61239  | 10113 | 12.38 | 99.23 |
| chr3 | 7988617 | 7997097 | 8481  | 0.03 | C_unshiu_00322 | 255107 | 246589 | 8519  | 3.34  | 98.66 |
| chr3 | 7992941 | 8014203 | 21263 | 0.08 | C_unshiu_01241 | 28366  | 7054   | 21313 | 26.09 | 98.25 |
| chr3 | 8000749 | 8035048 | 34300 | 0.12 | C_unshiu_00322 | 244408 | 209869 | 34540 | 13.53 | 98.1  |
| chr3 | 8051092 | 8055937 | 4846  | 0.02 | C_unshiu_00322 | 195608 | 190763 | 4846  | 1.9   | 99.15 |
| chr3 | 8056020 | 8068598 | 12579 | 0.05 | C_unshiu_00322 | 190657 | 178063 | 12595 | 4.93  | 99.13 |
| chr3 | 8069358 | 8096084 | 26727 | 0.1  | C_unshiu_00322 | 176518 | 149727 | 26792 | 10.5  | 98.94 |
| chr3 | 8096084 | 8103393 | 7310  | 0.03 | C_unshiu_00322 | 149577 | 142253 | 7325  | 2.87  | 98.3  |
| chr3 | 8123293 | 8124705 | 1413  | 0.01 | C_unshiu_02529 | 10010  | 11422  | 1413  | 5.92  | 100   |
| chr3 | 8125796 | 8127236 | 1441  | 0.01 | C_unshiu_02529 | 12753  | 14192  | 1440  | 6.03  | 99.72 |
| chr3 | 8137509 | 8142940 | 5432  | 0.02 | C_unshiu_00322 | 107537 | 102081 | 5457  | 2.14  | 99.12 |
| chr3 | 8153389 | 8156999 | 3611  | 0.01 | C_unshiu_00322 | 90849  | 87239  | 3611  | 1.41  | 98.15 |
| chr3 | 8195307 | 8214898 | 19592 | 0.07 | C_unshiu_00322 | 50104  | 30448  | 19657 | 7.7   | 98.65 |
| chr3 | 8239295 | 8241952 | 2658  | 0.01 | C_unshiu_00322 | 5610   | 2958   | 2653  | 1.04  | 98.53 |
| chr3 | 8243170 | 8245664 | 2495  | 0.01 | C_unshiu_01710 | 19295  | 16798  | 2498  | 4.8   | 98.8  |
| chr3 | 8266549 | 8270773 | 4225  | 0.02 | C_unshiu_00178 | 128621 | 132845 | 4225  | 1.17  | 100   |
| chr3 | 8284600 | 8294085 | 9486  | 0.03 | C_unshiu_00778 | 91734  | 82248  | 9487  | 7.22  | 98.82 |
| chr3 | 8294081 | 8303005 | 8925  | 0.03 | C_unshiu_00778 | 79045  | 70190  | 8856  | 6.74  | 98.12 |
| chr3 | 8314413 | 8320333 | 5921  | 0.02 | C_unshiu_00778 | 57902  | 51961  | 5942  | 4.52  | 99.02 |
| chr3 | 8329001 | 8338913 | 9913  | 0.04 | C_unshiu_00778 | 47093  | 37144  | 9950  | 7.57  | 98.41 |
| chr3 | 8342468 | 8343640 | 1173  | 0    | C_unshiu_00778 | 32288  | 31119  | 1170  | 0.89  | 98.55 |
| chr3 | 8343491 | 8359479 | 15989 | 0.06 | C_unshiu_00778 | 31121  | 15067  | 16055 | 12.22 | 98.35 |
| chr3 | 8364975 | 8367309 | 2335  | 0.01 | C_unshiu_01411 | 2558   | 4889   | 2332  | 3.33  | 99.4  |
| chr3 | 8370002 | 8384573 | 14572 | 0.05 | C_unshiu_01411 | 4753   | 19377  | 14625 | 20.87 | 98.1  |
| chr3 | 8413773 | 8416395 | 2623  | 0.01 | C_unshiu_01411 | 49539  | 52146  | 2608  | 3.72  | 98.02 |
| chr3 | 8438647 | 8440307 | 1661  | 0.01 | C_unshiu_00223 | 296896 | 295236 | 1661  | 0.53  | 99.16 |
| chr3 | 8440305 | 8442932 | 2628  | 0.01 | C_unshiu_00223 | 294800 | 292172 | 2629  | 0.84  | 99.01 |
| chr3 | 8442932 | 8448782 | 5851  | 0.02 | C_unshiu_00223 | 292008 | 286140 | 5869  | 1.87  | 98.18 |
| chr3 | 8477531 | 8495654 | 18124 | 0.07 | C_unshiu_00247 | 15776  | 33904  | 18129 | 6.09  | 98.64 |
| chr3 | 8495814 | 8502536 | 6723  | 0.02 | C_unshiu_00247 | 34147  | 40875  | 6729  | 2.26  | 98.24 |
| chr3 | 8509149 | 8551520 | 42372 | 0.15 | C_unshiu_00247 | 46527  | 89211  | 42685 | 14.34 | 98.5  |
| chr3 | 8563067 | 8582591 | 19525 | 0.07 | C_unshiu_00247 | 100692 | 120279 | 19588 | 6.58  | 98.86 |
| chr3 | 8587813 | 8589980 | 2168  | 0.01 | C_unshiu_00247 | 120283 | 122450 | 2168  | 0.73  | 99.63 |
| chr3 | 8623268 | 8637146 | 13879 | 0.05 | C_unshiu_00247 | 155034 | 168979 | 13946 | 4.69  | 98.32 |
| chr3 | 8639203 | 8641839 | 2637  | 0.01 | C_unshiu_01778 | 49365  | 46735  | 2631  | 5.33  | 98.14 |
| chr3 | 8656730 | 8662290 | 5561  | 0.02 | C_unshiu_01778 | 32505  | 26945  | 5561  | 11.27 | 99.73 |
| chr3 | 8669461 | 8683457 | 13997 | 0.05 | C_unshiu_00247 | 197366 | 211327 | 13962 | 4.69  | 98.56 |
| chr3 | 8684001 | 8685305 | 1305  | 0    | C_unshiu_00247 | 212455 | 213759 | 1305  | 0.44  | 100   |
| chr3 | 8687162 | 8692293 | 5132  | 0.02 | C_unshiu_00247 | 216963 | 222093 | 5131  | 1.72  | 99.73 |
| chr3 | 8692285 | 8693869 | 1585  | 0.01 | C_unshiu_00247 | 222464 | 224047 | 1584  | 0.53  | 99.87 |
| chr3 | 8700030 | 8710462 | 10433 | 0.04 | C_unshiu_00247 | 230449 | 240900 | 10452 | 3.51  | 98.75 |
| chr3 | 8708667 | 8715031 | 6365  | 0.02 | C_unshiu_02126 | 26590  | 20197  | 6394  | 17.88 | 98.11 |
| chr3 | 8715044 | 8720266 | 5223  | 0.02 | C_unshiu_02126 | 19939  | 14717  | 5223  | 14.61 | 99.29 |
| chr3 | 8727243 | 8734807 | 7565  | 0.03 | C_unshiu_02126 | 7561   | 1      | 7561  | 21.15 | 98.68 |
| chr3 | 8742114 | 8743759 | 1646  | 0.01 | C_unshiu_01535 | 35794  | 37436  | 1643  | 2.68  | 98.54 |
| chr3 | 8767631 | 8770119 | 2489  | 0.01 | C_unshiu_01337 | 71210  | 73706  | 2497  | 3.34  | 98.12 |
| chr3 | 8795657 | 8806285 | 10629 | 0.04 | C_unshiu_01337 | 41875  | 31196  | 10680 | 14.28 | 99.05 |
| chr3 | 8819820 | 8824888 | 5069  | 0.02 | C_unshiu_01191 | 86338  | 81272  | 5067  | 5.87  | 99.64 |
| chr3 | 8826605 | 8829275 | 2671  | 0.01 | C_unshiu_01191 | 79098  | 76429  | 2670  | 3.09  | 99.96 |
| chr3 | 8830073 | 8846989 | 16917 | 0.06 | C_unshiu_01191 | 75122  | 58217  | 16906 | 19.58 | 99.81 |
| chr3 | 8852246 | 8878902 | 26657 | 0.1  | C_unshiu_00239 | 34145  | 60935  | 26791 | 8.85  | 98.14 |
| chr3 | 8878674 | 8887308 | 8635  | 0.03 | C_unshiu_00239 | 60931  | 69566  | 8636  | 2.85  | 98.03 |
| chr3 | 8900145 | 8912658 | 12514 | 0.05 | C_unshiu_00194 | 13646  | 26202  | 12557 | 3.68  | 98.12 |
| chr3 | 8948025 | 8960203 | 12179 | 0.04 | C_unshiu_00194 | 61342  | 73467  | 12126 | 3.56  | 98.02 |
| chr3 | 8987696 | 9008200 | 20505 | 0.07 | C_unshiu_00194 | 99599  | 120205 | 20607 | 6.05  | 98.26 |
| chr3 | 9008375 | 9017680 | 9306  | 0.03 | C_unshiu_00194 | 120338 | 129651 | 9314  | 2.73  | 98.49 |
| chr3 | 9019796 | 9034854 | 15059 | 0.05 | C_unshiu_00194 | 131748 | 146920 | 15173 | 4.45  | 98.62 |
| chr3 | 9039881 | 9051161 | 11281 | 0.04 | C_unshiu_00194 | 155252 | 166531 | 11280 | 3.31  | 98.71 |
| chr3 | 9099431 | 9104752 | 5322  | 0.02 | C_unshiu_00194 | 212554 | 217885 | 5332  | 1.56  | 98.21 |
| chr3 | 9104751 | 9114426 | 9676  | 0.03 | C_unshiu_00194 | 218539 | 228217 | 9679  | 2.84  | 99.31 |
| chr3 | 9121885 | 9124162 | 2278  | 0.01 | C_unshiu_00194 | 230953 | 233230 | 2278  | 0.67  | 100   |
| chr3 | 9124185 | 9146059 | 21875 | 0.08 | C_unshiu_00194 | 236660 | 258520 | 21861 | 6.41  | 98.52 |
| chr3 | 9164702 | 9166986 | 2285  | 0.01 | C_unshiu_00194 | 278464 | 280736 | 2273  | 0.67  | 98.65 |
| chr3 | 9166978 | 9173658 | 6681  | 0.02 | C_unshiu_00194 | 281636 | 288310 | 6675  | 1.96  | 98.4  |
| chr3 | 9185112 | 9186853 | 1742  | 0.01 | C_unshiu_01914 | 24     | 1765   | 1742  | 3.94  | 100   |
| chr3 | 9187777 | 9189399 | 1623  | 0.01 | C_unshiu_01914 | 2920   | 4532   | 1613  | 3.65  | 98.95 |
| chr3 | 9199190 | 9224006 | 24817 | 0.09 | C_unshiu_01914 | 12571  | 37404  | 24834 | 56.19 | 99.18 |
| chr3 | 9224063 | 9230520 | 6458  | 0.02 | C_unshiu_01914 | 37785  | 44193  | 6409  | 14.5  | 98.64 |
| chr3 | 9229462 | 9249818 | 20357 | 0.07 | C_unshiu_00194 | 294664 | 315055 | 20392 | 5.98  | 98.75 |
| chr3 | 9249928 | 9271918 | 21991 | 0.08 | C_unshiu_00194 | 315065 | 337123 | 22059 | 6.47  | 99.21 |
| chr3 | 9271780 | 9275600 | 3821  | 0.01 | C_unshiu_00194 | 337054 | 340869 | 3816  | 1.12  | 98.3  |
| chr3 | 9285889 | 9289584 | 3696  | 0.01 | C_unshiu_00452 | 188150 | 191831 | 3682  | 1.78  | 99.16 |
| chr3 | 9289869 | 9291028 | 1160  | 0    | C_unshiu_00452 | 196496 | 197655 | 1160  | 0.56  | 99.74 |
| chr3 | 9293536 | 9296606 | 3071  | 0.01 | C_unshiu_00452 | 201436 | 204480 | 3045  | 1.47  | 98.08 |
| chr3 | 9316383 | 9319156 | 2774  | 0.01 | C_unshiu_00437 | 74511  | 71731  | 2781  | 1.31  | 99.39 |
| chr3 | 9333066 | 9335583 | 2518  | 0.01 | C_unshiu_00437 | 32287  | 29772  | 2516  | 1.18  | 98.65 |

|      |          |          |       |      |                |        |        |       |       |       |
|------|----------|----------|-------|------|----------------|--------|--------|-------|-------|-------|
| chr3 | 9338128  | 9346474  | 8347  | 0.03 | C_unshiu_00875 | 91045  | 82712  | 8334  | 6.96  | 99.5  |
| chr3 | 9363359  | 9380342  | 16984 | 0.06 | C_unshiu_00875 | 65524  | 48581  | 16944 | 14.15 | 98.22 |
| chr3 | 9387663  | 9390994  | 3332  | 0.01 | C_unshiu_00875 | 41938  | 38607  | 3332  | 2.78  | 99.94 |
| chr3 | 9392346  | 9394263  | 1918  | 0.01 | C_unshiu_00875 | 36743  | 34826  | 1918  | 1.6   | 99.79 |
| chr3 | 9407189  | 9412101  | 4913  | 0.02 | C_unshiu_00719 | 122938 | 118071 | 4868  | 3.44  | 99    |
| chr3 | 9414229  | 9419637  | 5409  | 0.02 | C_unshiu_00719 | 112121 | 106713 | 5409  | 3.82  | 99.96 |
| chr3 | 9420398  | 9428743  | 8346  | 0.03 | C_unshiu_00719 | 94903  | 86557  | 8347  | 5.9   | 99.8  |
| chr3 | 9427902  | 9431381  | 3480  | 0.01 | C_unshiu_00719 | 140240 | 136779 | 3462  | 2.45  | 98.77 |
| chr3 | 9431405  | 9434322  | 2918  | 0.01 | C_unshiu_00719 | 86799  | 83881  | 2919  | 2.06  | 99.83 |
| chr3 | 9435604  | 9439180  | 3577  | 0.01 | C_unshiu_00719 | 82178  | 78602  | 3577  | 2.53  | 100   |
| chr3 | 9439481  | 9440863  | 1383  | 0    | C_unshiu_00719 | 78037  | 76655  | 1383  | 0.98  | 100   |
| chr3 | 9443101  | 9452981  | 9881  | 0.04 | C_unshiu_00719 | 73589  | 63763  | 9827  | 6.95  | 98.41 |
| chr3 | 9472952  | 9480041  | 7090  | 0.03 | C_unshiu_02606 | 21934  | 14827  | 7108  | 32.41 | 98.62 |
| chr3 | 9485960  | 9488930  | 2971  | 0.01 | C_unshiu_02606 | 14781  | 11811  | 2971  | 13.55 | 99.83 |
| chr3 | 9489362  | 9495770  | 6409  | 0.02 | C_unshiu_02606 | 10934  | 4525   | 6410  | 29.22 | 99.84 |
| chr3 | 9493436  | 9533767  | 40332 | 0.15 | C_unshiu_01942 | 43008  | 2679   | 40330 | 93.77 | 99.72 |
| chr3 | 9535649  | 9537519  | 1871  | 0.01 | C_unshiu_00719 | 43890  | 42022  | 1869  | 1.32  | 98.93 |
| chr3 | 9544899  | 9550524  | 5626  | 0.02 | C_unshiu_00719 | 35786  | 30148  | 5639  | 3.99  | 98.76 |
| chr3 | 9553711  | 9558725  | 5015  | 0.02 | C_unshiu_00719 | 27297  | 22276  | 5022  | 3.55  | 98.02 |
| chr3 | 9558253  | 9565488  | 7236  | 0.03 | C_unshiu_01345 | 74358  | 67139  | 7220  | 9.71  | 99.39 |
| chr3 | 9565860  | 9567137  | 1278  | 0    | C_unshiu_01345 | 66554  | 65277  | 1278  | 1.72  | 100   |
| chr3 | 9567472  | 9571159  | 3688  | 0.01 | C_unshiu_01345 | 64226  | 60569  | 3658  | 4.92  | 98.94 |
| chr3 | 9570032  | 9578640  | 8609  | 0.03 | C_unshiu_00719 | 10228  | 1602   | 8627  | 6.1   | 99.36 |
| chr3 | 9576574  | 9597951  | 21378 | 0.08 | C_unshiu_01345 | 55989  | 34623  | 21367 | 28.74 | 98.53 |
| chr3 | 9603595  | 9633314  | 29720 | 0.11 | C_unshiu_01345 | 29731  | 1      | 29731 | 39.98 | 98.6  |
| chr3 | 9630521  | 9643715  | 13195 | 0.05 | C_unshiu_02422 | 26832  | 13620  | 13213 | 49.24 | 99.1  |
| chr3 | 9648804  | 9653948  | 5145  | 0.02 | C_unshiu_00037 | 668730 | 663582 | 5149  | 0.77  | 98.6  |
| chr3 | 9653948  | 9666815  | 12868 | 0.05 | C_unshiu_00037 | 662399 | 649475 | 12925 | 1.92  | 98.5  |
| chr3 | 9666823  | 9697030  | 30208 | 0.11 | C_unshiu_00037 | 649350 | 619131 | 30220 | 4.49  | 98.1  |
| chr3 | 9709767  | 9712062  | 2296  | 0.01 | C_unshiu_00037 | 608851 | 606570 | 2282  | 0.34  | 98.43 |
| chr3 | 9749991  | 9756988  | 6998  | 0.03 | C_unshiu_00037 | 572280 | 565249 | 7032  | 1.05  | 98.11 |
| chr3 | 9774176  | 9776310  | 2135  | 0.01 | C_unshiu_00037 | 552368 | 550213 | 2156  | 0.32  | 98.47 |
| chr3 | 9777813  | 9790778  | 12966 | 0.05 | C_unshiu_00037 | 550018 | 537018 | 13001 | 1.93  | 99.02 |
| chr3 | 9815252  | 9856212  | 40961 | 0.15 | C_unshiu_00037 | 522140 | 481062 | 41079 | 6.11  | 98    |
| chr3 | 9885498  | 9896941  | 11444 | 0.04 | C_unshiu_00037 | 451567 | 440135 | 11433 | 1.7   | 98.54 |
| chr3 | 9896940  | 9906048  | 9109  | 0.03 | C_unshiu_00037 | 439720 | 430583 | 9138  | 1.36  | 99.19 |
| chr3 | 9912810  | 9923630  | 10821 | 0.04 | C_unshiu_00037 | 423994 | 413144 | 10851 | 1.61  | 99.05 |
| chr3 | 9923634  | 9927602  | 3969  | 0.01 | C_unshiu_00037 | 413026 | 409058 | 3969  | 0.59  | 99.45 |
| chr3 | 9943120  | 9959072  | 15953 | 0.06 | C_unshiu_01697 | 31875  | 47881  | 16007 | 30.44 | 98.89 |
| chr3 | 9956008  | 9981658  | 25651 | 0.09 | C_unshiu_00727 | 1      | 25710  | 25710 | 18.46 | 99.26 |
| chr3 | 9988617  | 10000049 | 11433 | 0.04 | C_unshiu_00727 | 33897  | 45320  | 11424 | 8.2   | 99.49 |
| chr3 | 10005000 | 10007394 | 2395  | 0.01 | C_unshiu_00204 | 109958 | 107564 | 2395  | 0.72  | 100   |
| chr3 | 10007884 | 10009260 | 1377  | 0    | C_unshiu_02443 | 17977  | 16601  | 1377  | 5.22  | 100   |
| chr3 | 10009925 | 10011174 | 1250  | 0    | C_unshiu_02443 | 15514  | 14265  | 1250  | 4.74  | 100   |
| chr3 | 10011180 | 10012460 | 1281  | 0    | C_unshiu_02443 | 13720  | 12439  | 1282  | 4.86  | 98.99 |
| chr3 | 10016654 | 10017980 | 1327  | 0    | C_unshiu_00727 | 60487  | 61812  | 1326  | 0.95  | 98.94 |
| chr3 | 10018320 | 10031215 | 12896 | 0.05 | C_unshiu_00727 | 61262  | 74158  | 12897 | 9.26  | 98.77 |
| chr3 | 10031485 | 10033341 | 1857  | 0.01 | C_unshiu_00727 | 74144  | 76004  | 1861  | 1.34  | 99.68 |
| chr3 | 10034362 | 10038275 | 3914  | 0.01 | C_unshiu_00727 | 76676  | 80597  | 3922  | 2.82  | 99.16 |
| chr3 | 10038968 | 10056221 | 17254 | 0.06 | C_unshiu_00727 | 80639  | 97920  | 17282 | 12.41 | 99.33 |
| chr3 | 10062052 | 10074952 | 12901 | 0.05 | C_unshiu_00727 | 103094 | 115987 | 12894 | 9.26  | 99.14 |
| chr3 | 10075718 | 10079500 | 3783  | 0.01 | C_unshiu_01868 | 33536  | 29754  | 3783  | 8.25  | 99.95 |
| chr3 | 10082096 | 10083254 | 1159  | 0    | C_unshiu_01868 | 26694  | 25536  | 1159  | 2.53  | 99.91 |
| chr3 | 10086861 | 10101490 | 14630 | 0.05 | C_unshiu_00317 | 1      | 14607  | 14607 | 5.66  | 99.61 |
| chr3 | 10104587 | 10107056 | 2470  | 0.01 | C_unshiu_01573 | 22425  | 24894  | 2470  | 4.19  | 100   |
| chr3 | 10107638 | 10133395 | 25758 | 0.09 | C_unshiu_00317 | 20527  | 46230  | 25704 | 9.96  | 99.4  |
| chr3 | 10133511 | 10169110 | 35600 | 0.13 | C_unshiu_00317 | 48698  | 84295  | 35598 | 13.79 | 99.97 |
| chr3 | 10168724 | 10186006 | 17283 | 0.06 | C_unshiu_00317 | 88914  | 106197 | 17284 | 6.7   | 99.99 |
| chr3 | 10189481 | 10192099 | 2619  | 0.01 | C_unshiu_00317 | 108588 | 111203 | 2616  | 1.01  | 98.09 |
| chr3 | 10192258 | 10201121 | 8864  | 0.03 | C_unshiu_00317 | 113058 | 121841 | 8784  | 3.4   | 98.88 |
| chr3 | 10201883 | 10259733 | 57851 | 0.21 | C_unshiu_00317 | 123077 | 180930 | 57854 | 22.42 | 99.99 |
| chr3 | 10267984 | 10277789 | 9806  | 0.04 | C_unshiu_02369 | 25792  | 15988  | 9805  | 35.15 | 99.93 |
| chr3 | 10278885 | 10284577 | 5693  | 0.02 | C_unshiu_02369 | 14970  | 9282   | 5689  | 20.39 | 99.77 |
| chr3 | 10291575 | 10301936 | 10362 | 0.04 | C_unshiu_02971 | 13804  | 3443   | 10362 | 75.07 | 99.98 |
| chr3 | 10314736 | 10329910 | 15175 | 0.05 | C_unshiu_00517 | 143147 | 127967 | 15181 | 8.16  | 99.89 |
| chr3 | 10330265 | 10359924 | 29660 | 0.11 | C_unshiu_00517 | 127182 | 97491  | 29692 | 15.96 | 99.28 |
| chr3 | 10361282 | 10363197 | 1916  | 0.01 | C_unshiu_00517 | 97324  | 95407  | 1918  | 1.03  | 99.69 |
| chr3 | 10364094 | 10377308 | 13215 | 0.05 | C_unshiu_00517 | 94074  | 80846  | 13229 | 7.11  | 99.64 |
| chr3 | 10377310 | 10398948 | 21639 | 0.08 | C_unshiu_00517 | 80090  | 58435  | 21656 | 11.64 | 99.84 |
| chr3 | 10412905 | 10414967 | 2063  | 0.01 | C_unshiu_00419 | 217213 | 219285 | 2073  | 0.95  | 98.41 |
| chr3 | 10414538 | 10424106 | 9569  | 0.03 | C_unshiu_00419 | 217210 | 207620 | 9591  | 4.37  | 99.72 |
| chr3 | 10438164 | 10452312 | 14149 | 0.05 | C_unshiu_00419 | 202615 | 188457 | 14159 | 6.46  | 99.9  |
| chr3 | 10452313 | 10453642 | 1330  | 0    | C_unshiu_00419 | 188265 | 186931 | 1335  | 0.61  | 99.48 |
| chr3 | 10454203 | 10471116 | 16914 | 0.06 | C_unshiu_00100 | 228374 | 211371 | 17004 | 3.72  | 98.12 |
| chr3 | 10501587 | 10502766 | 1180  | 0    | C_unshiu_00100 | 199058 | 197877 | 1182  | 0.26  | 99.49 |
| chr3 | 10504976 | 10506274 | 1299  | 0    | C_unshiu_00100 | 194168 | 192870 | 1299  | 0.28  | 99.38 |
| chr3 | 10507312 | 10523189 | 15878 | 0.06 | C_unshiu_02239 | 16143  | 32051  | 15909 | 49.64 | 99.38 |
| chr3 | 10508786 | 10537756 | 28971 | 0.1  | C_unshiu_00100 | 190308 | 161214 | 29095 | 6.37  | 98.95 |
| chr3 | 10537738 | 10539745 | 2008  | 0.01 | C_unshiu_00100 | 161184 | 159162 | 2023  | 0.44  | 99.16 |

|      |          |          |       |      |                |        |        |       |       |       |
|------|----------|----------|-------|------|----------------|--------|--------|-------|-------|-------|
| chr3 | 10539642 | 10564106 | 24465 | 0.09 | C_unshiu_00100 | 159141 | 134587 | 24555 | 5.37  | 98.34 |
| chr3 | 10565624 | 10591944 | 26321 | 0.1  | C_unshiu_00350 | 1      | 26260  | 26260 | 10.87 | 99.28 |
| chr3 | 10591930 | 10606281 | 14352 | 0.05 | C_unshiu_00350 | 26612  | 40956  | 14345 | 5.94  | 99.02 |
| chr3 | 10607201 | 10616806 | 9606  | 0.03 | C_unshiu_00350 | 42277  | 51884  | 9608  | 3.98  | 99.45 |
| chr3 | 10616798 | 10631578 | 14781 | 0.05 | C_unshiu_00350 | 52982  | 67765  | 14784 | 6.12  | 99.83 |
| chr3 | 10631590 | 10635015 | 3426  | 0.01 | C_unshiu_00350 | 68170  | 71598  | 3429  | 1.42  | 99.74 |
| chr3 | 10635129 | 10653378 | 18250 | 0.07 | C_unshiu_00350 | 71763  | 90076  | 18314 | 7.58  | 99.5  |
| chr3 | 10660780 | 10669240 | 8461  | 0.03 | C_unshiu_00350 | 94616  | 103078 | 8463  | 3.5   | 98.75 |
| chr3 | 10669259 | 10687549 | 18291 | 0.07 | C_unshiu_00350 | 103557 | 121852 | 18296 | 7.58  | 99.81 |
| chr3 | 10687577 | 10704699 | 17123 | 0.06 | C_unshiu_00350 | 122176 | 139305 | 17130 | 7.09  | 99.81 |
| chr3 | 10704673 | 10710788 | 6116  | 0.02 | C_unshiu_00898 | 56080  | 49963  | 6118  | 5.22  | 99.9  |
| chr3 | 10710789 | 10737527 | 26739 | 0.1  | C_unshiu_00350 | 145799 | 172542 | 26744 | 11.07 | 99.83 |
| chr3 | 10743432 | 10746480 | 3049  | 0.01 | C_unshiu_00350 | 181652 | 184711 | 3060  | 1.27  | 99.61 |
| chr3 | 10746483 | 10747681 | 1199  | 0    | C_unshiu_00264 | 22552  | 23750  | 1199  | 0.42  | 99.67 |
| chr3 | 10748037 | 10750262 | 2226  | 0.01 | C_unshiu_00264 | 24118  | 26343  | 2226  | 0.78  | 99.91 |
| chr3 | 10750483 | 10753146 | 2664  | 0.01 | C_unshiu_00264 | 26915  | 29578  | 2664  | 0.94  | 99.92 |
| chr3 | 10753154 | 10755433 | 2280  | 0.01 | C_unshiu_00264 | 29905  | 32185  | 2281  | 0.8   | 99.78 |
| chr3 | 10757588 | 10761066 | 3479  | 0.01 | C_unshiu_00264 | 33094  | 36590  | 3497  | 1.23  | 99.34 |
| chr3 | 10764907 | 10771057 | 6151  | 0.02 | C_unshiu_00350 | 190048 | 196198 | 6151  | 2.55  | 99.9  |
| chr3 | 10777850 | 10782770 | 4921  | 0.02 | C_unshiu_01932 | 1      | 4923   | 4923  | 11.32 | 98.83 |
| chr3 | 10787530 | 10789234 | 1705  | 0.01 | C_unshiu_00304 | 250027 | 251733 | 1707  | 0.64  | 99.82 |
| chr3 | 10804503 | 10814856 | 10354 | 0.04 | C_unshiu_01864 | 1      | 10303  | 10303 | 22.43 | 98.77 |
| chr3 | 10814858 | 10820979 | 6122  | 0.02 | C_unshiu_01864 | 10532  | 16686  | 6155  | 13.4  | 99.22 |
| chr3 | 10823496 | 10826714 | 3219  | 0.01 | C_unshiu_00021 | 67104  | 70331  | 3228  | 0.41  | 98.36 |
| chr3 | 10833660 | 10855538 | 21879 | 0.08 | C_unshiu_00660 | 151507 | 129644 | 21864 | 14.2  | 99.8  |
| chr3 | 10854990 | 10862870 | 7881  | 0.03 | C_unshiu_00660 | 128297 | 120417 | 7881  | 5.12  | 99.94 |
| chr3 | 10862894 | 10866345 | 3452  | 0.01 | C_unshiu_00660 | 119898 | 116445 | 3454  | 2.24  | 99.51 |
| chr3 | 10866365 | 10873854 | 7490  | 0.03 | C_unshiu_00660 | 115376 | 107879 | 7498  | 4.87  | 99.31 |
| chr3 | 10873848 | 10875065 | 1218  | 0    | C_unshiu_00091 | 77687  | 76470  | 1218  | 0.26  | 100   |
| chr3 | 10875066 | 10877221 | 2156  | 0.01 | C_unshiu_00660 | 107002 | 104847 | 2156  | 1.4   | 99.49 |
| chr3 | 10877310 | 10880384 | 3075  | 0.01 | C_unshiu_00660 | 104733 | 101660 | 3074  | 2     | 99.12 |
| chr3 | 10880445 | 10887247 | 6803  | 0.02 | C_unshiu_00575 | 75584  | 82343  | 6760  | 3.92  | 98.01 |
| chr3 | 10884463 | 10901399 | 16937 | 0.06 | C_unshiu_01878 | 45400  | 28437  | 16964 | 37.37 | 99.35 |
| chr3 | 10901418 | 10902844 | 1427  | 0.01 | C_unshiu_01878 | 27456  | 26030  | 1427  | 3.14  | 100   |
| chr3 | 10904000 | 10918852 | 14853 | 0.05 | C_unshiu_00523 | 52979  | 67823  | 14845 | 8.02  | 99.15 |
| chr3 | 10918922 | 10920763 | 1842  | 0.01 | C_unshiu_00523 | 67816  | 69673  | 1858  | 1     | 98.17 |
| chr3 | 10925955 | 10949891 | 23937 | 0.09 | C_unshiu_00523 | 74398  | 98355  | 23958 | 12.94 | 98.51 |
| chr3 | 10954576 | 10957854 | 3279  | 0.01 | C_unshiu_00523 | 104126 | 107417 | 3292  | 1.78  | 98.91 |
| chr3 | 10957742 | 10961206 | 3465  | 0.01 | C_unshiu_00523 | 107383 | 110854 | 3472  | 1.88  | 98.93 |
| chr3 | 10977330 | 10981146 | 3817  | 0.01 | C_unshiu_00523 | 124188 | 128002 | 3815  | 2.06  | 99.19 |
| chr3 | 10981104 | 10991902 | 10799 | 0.04 | C_unshiu_00523 | 128024 | 138825 | 10802 | 5.84  | 98.96 |
| chr3 | 10992061 | 11001245 | 9185  | 0.03 | C_unshiu_00523 | 139182 | 148381 | 9200  | 4.97  | 99.22 |
| chr3 | 11004769 | 11011856 | 7088  | 0.03 | C_unshiu_02988 | 5715   | 12807  | 7093  | 53.62 | 99.93 |
| chr3 | 11012464 | 11015209 | 2746  | 0.01 | C_unshiu_00001 | 49332  | 46587  | 2746  | 0.1   | 100   |
| chr3 | 11015259 | 11024558 | 9300  | 0.03 | C_unshiu_00001 | 46407  | 37108  | 9300  | 0.35  | 100   |
| chr3 | 11026828 | 11032722 | 5895  | 0.02 | C_unshiu_00001 | 33971  | 28121  | 5851  | 0.22  | 98.21 |
| chr3 | 11063351 | 11076585 | 13235 | 0.05 | C_unshiu_00256 | 290709 | 277580 | 13130 | 4.52  | 98.08 |
| chr3 | 11076586 | 11097888 | 21303 | 0.08 | C_unshiu_00256 | 277470 | 256067 | 21404 | 7.36  | 99.02 |
| chr3 | 11101079 | 11126036 | 24958 | 0.09 | C_unshiu_00256 | 256075 | 231118 | 24958 | 8.59  | 98.69 |
| chr3 | 11126147 | 11128613 | 2467  | 0.01 | C_unshiu_00256 | 230488 | 228009 | 2480  | 0.85  | 98.79 |
| chr3 | 11129865 | 11143355 | 13491 | 0.05 | C_unshiu_00256 | 227982 | 214458 | 13525 | 4.65  | 98.71 |
| chr3 | 11175179 | 11176258 | 1080  | 0    | C_unshiu_00294 | 3486   | 2414   | 1073  | 0.4   | 98.06 |
| chr3 | 11176453 | 11182772 | 6320  | 0.02 | C_unshiu_00256 | 190658 | 184337 | 6322  | 2.17  | 99.6  |
| chr3 | 11218788 | 11247626 | 28839 | 0.1  | C_unshiu_01527 | 35637  | 6689   | 28949 | 46.79 | 98.98 |
| chr3 | 11242715 | 11247817 | 5103  | 0.02 | C_unshiu_01361 | 61834  | 56748  | 5087  | 6.92  | 98.94 |
| chr3 | 11247945 | 11250399 | 2455  | 0.01 | C_unshiu_01361 | 56586  | 54129  | 2458  | 3.34  | 99.88 |
| chr3 | 11252346 | 11253542 | 1197  | 0    | C_unshiu_01361 | 51680  | 50484  | 1197  | 1.63  | 100   |
| chr3 | 11258788 | 11264457 | 5670  | 0.02 | C_unshiu_01361 | 46938  | 41245  | 5694  | 7.75  | 98.79 |
| chr3 | 11265371 | 11270720 | 5350  | 0.02 | C_unshiu_01361 | 40318  | 34967  | 5352  | 7.28  | 99.22 |
| chr3 | 11274932 | 11286196 | 11265 | 0.04 | C_unshiu_01361 | 32424  | 21096  | 11329 | 15.42 | 98.03 |
| chr3 | 11287632 | 11295733 | 8102  | 0.03 | C_unshiu_01361 | 20378  | 12272  | 8107  | 11.03 | 98.69 |
| chr3 | 11296592 | 11297748 | 1157  | 0    | C_unshiu_00335 | 233570 | 232414 | 1157  | 0.46  | 98.11 |
| chr3 | 11297941 | 11311128 | 13188 | 0.05 | C_unshiu_00335 | 232431 | 219198 | 13234 | 5.28  | 98.13 |
| chr3 | 11311157 | 11315193 | 4037  | 0.01 | C_unshiu_00335 | 219012 | 214960 | 4053  | 1.62  | 98.23 |
| chr3 | 11315171 | 11334674 | 19504 | 0.07 | C_unshiu_00335 | 214346 | 194803 | 19544 | 7.79  | 98.56 |
| chr3 | 11332166 | 11341953 | 9788  | 0.04 | C_unshiu_01719 | 51854  | 42058  | 9797  | 18.89 | 98.89 |
| chr3 | 11354677 | 11358495 | 3819  | 0.01 | C_unshiu_00671 | 64071  | 67893  | 3823  | 2.52  | 98.67 |
| chr3 | 11369329 | 11371016 | 1688  | 0.01 | C_unshiu_00671 | 71039  | 72728  | 1690  | 1.12  | 98.99 |
| chr3 | 11374063 | 11377632 | 3570  | 0.01 | C_unshiu_00671 | 76524  | 80103  | 3580  | 2.36  | 99.25 |
| chr3 | 11386027 | 11391885 | 5859  | 0.02 | C_unshiu_00671 | 89350  | 95208  | 5859  | 3.87  | 99.69 |
| chr3 | 11391877 | 11405966 | 14090 | 0.05 | C_unshiu_00671 | 95360  | 109441 | 14082 | 9.29  | 99.31 |
| chr3 | 11407463 | 11433340 | 25878 | 0.09 | C_unshiu_00671 | 109655 | 135575 | 25921 | 17.11 | 99.32 |
| chr3 | 11434193 | 11435941 | 1749  | 0.01 | C_unshiu_00671 | 136860 | 138609 | 1750  | 1.16  | 99.54 |
| chr3 | 11437360 | 11448394 | 11035 | 0.04 | C_unshiu_00061 | 357036 | 345998 | 11039 | 1.91  | 99.95 |
| chr3 | 11453193 | 11462839 | 9647  | 0.03 | C_unshiu_02954 | 14006  | 4430   | 9577  | 67.15 | 98.78 |
| chr3 | 11462861 | 11465718 | 2858  | 0.01 | C_unshiu_00061 | 332279 | 329436 | 2844  | 0.49  | 99.02 |
| chr3 | 11481731 | 11483147 | 1417  | 0.01 | C_unshiu_00722 | 12174  | 10758  | 1417  | 1     | 100   |
| chr3 | 11486958 | 11496396 | 9439  | 0.03 | C_unshiu_00061 | 341461 | 332037 | 9425  | 1.63  | 99.51 |
| chr3 | 11499414 | 11500520 | 1107  | 0    | C_unshiu_02954 | 1110   | 1      | 1110  | 7.78  | 99.1  |

|      |          |          |       |      |                |        |        |       |       |       |
|------|----------|----------|-------|------|----------------|--------|--------|-------|-------|-------|
| chr3 | 11499415 | 11501348 | 1934  | 0.01 | C_unshiu_00061 | 329187 | 327268 | 1920  | 0.33  | 98.35 |
| chr3 | 11507948 | 11509178 | 1231  | 0    | C_unshiu_00722 | 27969  | 26739  | 1231  | 0.87  | 99.51 |
| chr3 | 11526124 | 11535358 | 9235  | 0.03 | C_unshiu_00523 | 164246 | 173478 | 9233  | 4.99  | 99.88 |
| chr3 | 11545886 | 11555715 | 9830  | 0.04 | C_unshiu_00774 | 14213  | 24024  | 9812  | 7.42  | 98.44 |
| chr3 | 11555713 | 11559099 | 3387  | 0.01 | C_unshiu_00774 | 24801  | 28187  | 3387  | 2.56  | 98.7  |
| chr3 | 11631201 | 11633196 | 1996  | 0.01 | C_unshiu_00522 | 185252 | 183247 | 2006  | 1.08  | 98.41 |
| chr3 | 11634075 | 11655750 | 21676 | 0.08 | C_unshiu_00522 | 182721 | 161026 | 21696 | 11.71 | 98.53 |
| chr3 | 11657076 | 11665473 | 8398  | 0.03 | C_unshiu_00522 | 160169 | 151749 | 8421  | 4.55  | 98.59 |
| chr3 | 11665475 | 11671044 | 5570  | 0.02 | C_unshiu_00522 | 151130 | 145536 | 5595  | 3.02  | 98.93 |
| chr3 | 11692065 | 11703957 | 11893 | 0.04 | C_unshiu_00522 | 123609 | 111719 | 11891 | 6.42  | 99.98 |
| chr3 | 11705133 | 11716048 | 10916 | 0.04 | C_unshiu_00522 | 110041 | 99037  | 11005 | 5.94  | 98.26 |
| chr3 | 11717346 | 11721062 | 3717  | 0.01 | C_unshiu_00522 | 97728  | 94002  | 3727  | 2.01  | 98.87 |
| chr3 | 11738436 | 11743933 | 5498  | 0.02 | C_unshiu_00522 | 79191  | 73709  | 5483  | 2.96  | 99.13 |
| chr3 | 11751749 | 11753079 | 1331  | 0    | C_unshiu_00123 | 420267 | 418934 | 1334  | 0.32  | 98.88 |
| chr3 | 11760570 | 11769389 | 8820  | 0.03 | C_unshiu_00522 | 63032  | 54213  | 8820  | 4.76  | 99.83 |
| chr3 | 11770561 | 11772617 | 2057  | 0.01 | C_unshiu_00123 | 403001 | 400945 | 2057  | 0.49  | 99.9  |
| chr3 | 11776960 | 11791706 | 14747 | 0.05 | C_unshiu_00522 | 47876  | 33108  | 14769 | 7.97  | 99.79 |
| chr3 | 11796251 | 11806356 | 10106 | 0.04 | C_unshiu_01908 | 8094   | 18204  | 10111 | 22.82 | 99.95 |
| chr3 | 11808775 | 11819441 | 10667 | 0.04 | C_unshiu_01908 | 20757  | 31410  | 10654 | 24.04 | 98.66 |
| chr3 | 11832138 | 11833562 | 1425  | 0.01 | C_unshiu_01908 | 42888  | 44312  | 1425  | 3.22  | 100   |
| chr3 | 11840959 | 11845996 | 5038  | 0.02 | C_unshiu_00054 | 80624  | 85665  | 5042  | 0.85  | 99.33 |
| chr3 | 11848085 | 11858853 | 10769 | 0.04 | C_unshiu_00054 | 88019  | 98834  | 10816 | 1.82  | 98.16 |
| chr3 | 11858853 | 11862901 | 4049  | 0.01 | C_unshiu_00054 | 98953  | 103014 | 4062  | 0.68  | 98.77 |
| chr3 | 11863173 | 11864666 | 1494  | 0.01 | C_unshiu_00054 | 103292 | 104787 | 1496  | 0.25  | 99    |
| chr3 | 11868672 | 11876174 | 7503  | 0.03 | C_unshiu_00054 | 109725 | 117300 | 7576  | 1.27  | 98.23 |
| chr3 | 11876168 | 11890233 | 14066 | 0.05 | C_unshiu_00054 | 117949 | 132041 | 14093 | 2.37  | 98.09 |
| chr3 | 11903280 | 11911437 | 8158  | 0.03 | C_unshiu_00054 | 143790 | 151956 | 8167  | 1.37  | 98.75 |
| chr3 | 11913886 | 11922463 | 8578  | 0.03 | C_unshiu_03042 | 3173   | 11765  | 8593  | 73.04 | 99.07 |
| chr3 | 11937635 | 11941339 | 3705  | 0.01 | C_unshiu_00054 | 177072 | 180773 | 3702  | 0.62  | 98.9  |
| chr3 | 11941377 | 11947087 | 5711  | 0.02 | C_unshiu_00054 | 180769 | 186492 | 5724  | 0.96  | 99.13 |
| chr3 | 11956092 | 11957528 | 1437  | 0.01 | C_unshiu_00054 | 190900 | 192331 | 1432  | 0.24  | 98.61 |
| chr3 | 11958290 | 12004894 | 46605 | 0.17 | C_unshiu_00054 | 195367 | 242150 | 46784 | 7.86  | 99.09 |
| chr3 | 12052270 | 12068245 | 15976 | 0.06 | C_unshiu_02214 | 1      | 15977  | 15977 | 48.68 | 99.93 |
| chr3 | 12073747 | 12085426 | 11680 | 0.04 | C_unshiu_02214 | 21076  | 32819  | 11744 | 35.78 | 98.47 |
| chr3 | 12084698 | 12092389 | 7692  | 0.03 | C_unshiu_00054 | 283832 | 291573 | 7742  | 1.3   | 98.5  |
| chr3 | 12092932 | 12098329 | 5398  | 0.02 | C_unshiu_00054 | 292102 | 297483 | 5382  | 0.9   | 98.85 |
| chr3 | 12131286 | 12132797 | 1512  | 0.01 | C_unshiu_01656 | 43964  | 45475  | 1512  | 2.75  | 100   |
| chr3 | 12134640 | 12148512 | 13873 | 0.05 | C_unshiu_00054 | 333371 | 347246 | 13876 | 2.33  | 99.24 |
| chr3 | 12149923 | 12151851 | 1929  | 0.01 | C_unshiu_00054 | 349089 | 351021 | 1933  | 0.32  | 98.97 |
| chr3 | 12157802 | 12159684 | 1883  | 0.01 | C_unshiu_00054 | 353053 | 354937 | 1885  | 0.32  | 99.63 |
| chr3 | 12159724 | 12162813 | 3090  | 0.01 | C_unshiu_00054 | 355101 | 358195 | 3095  | 0.52  | 98.94 |
| chr3 | 12163118 | 12164669 | 1552  | 0.01 | C_unshiu_02369 | 16432  | 14882  | 1551  | 5.56  | 98.84 |
| chr3 | 12164667 | 12168403 | 3737  | 0.01 | C_unshiu_00054 | 364536 | 368275 | 3740  | 0.63  | 99.23 |
| chr3 | 12169292 | 12176248 | 6957  | 0.03 | C_unshiu_00054 | 369398 | 376352 | 6955  | 1.17  | 98.88 |
| chr3 | 12187934 | 12195424 | 7491  | 0.03 | C_unshiu_00054 | 386675 | 394201 | 7527  | 1.26  | 99.16 |
| chr3 | 12197901 | 12205287 | 7387  | 0.03 | C_unshiu_00054 | 396103 | 403491 | 7389  | 1.24  | 99.91 |
| chr3 | 12206987 | 12213581 | 6595  | 0.02 | C_unshiu_00054 | 403743 | 410353 | 6611  | 1.11  | 99.43 |
| chr3 | 12242237 | 12243951 | 1715  | 0.01 | C_unshiu_00439 | 168228 | 166507 | 1722  | 0.81  | 99.59 |
| chr3 | 12244038 | 12245234 | 1197  | 0    | C_unshiu_00439 | 166370 | 165174 | 1197  | 0.56  | 99.5  |
| chr3 | 12249471 | 12256801 | 7331  | 0.03 | C_unshiu_00054 | 426740 | 434070 | 7331  | 1.23  | 99.7  |
| chr3 | 12258297 | 12284849 | 26553 | 0.1  | C_unshiu_02433 | 26673  | 5      | 26669 | 99.99 | 98    |
| chr3 | 12286918 | 12290488 | 3571  | 0.01 | C_unshiu_00522 | 31575  | 28016  | 3560  | 1.92  | 99.27 |
| chr3 | 12291376 | 12311871 | 20496 | 0.07 | C_unshiu_00522 | 26729  | 6223   | 20507 | 11.07 | 99.58 |
| chr3 | 12306848 | 12317376 | 10529 | 0.04 | C_unshiu_01965 | 20310  | 9783   | 10528 | 25.03 | 98.38 |
| chr3 | 12324093 | 12332105 | 8013  | 0.03 | C_unshiu_00787 | 78875  | 70838  | 8038  | 6.17  | 99.54 |
| chr3 | 12332124 | 12337069 | 4946  | 0.02 | C_unshiu_00787 | 70593  | 65637  | 4957  | 3.8   | 99.72 |
| chr3 | 12342074 | 12368405 | 26332 | 0.1  | C_unshiu_00787 | 61969  | 35613  | 26357 | 20.22 | 99.89 |
| chr3 | 12348420 | 12397505 | 49086 | 0.18 | C_unshiu_00787 | 55623  | 6507   | 49117 | 37.68 | 99.79 |
| chr3 | 12389892 | 12403109 | 13218 | 0.05 | C_unshiu_00054 | 446444 | 459675 | 13232 | 2.22  | 98.09 |
| chr3 | 12403476 | 12410137 | 6662  | 0.02 | C_unshiu_00528 | 177786 | 171116 | 6671  | 3.62  | 98.48 |
| chr3 | 12410706 | 12412292 | 1587  | 0.01 | C_unshiu_00528 | 170859 | 169273 | 1587  | 0.86  | 99.12 |
| chr3 | 12413761 | 12426549 | 12789 | 0.05 | C_unshiu_00528 | 167188 | 154504 | 12685 | 6.88  | 98.8  |
| chr3 | 12429820 | 12434794 | 4975  | 0.02 | C_unshiu_00054 | 479467 | 484459 | 4993  | 0.84  | 98.48 |
| chr3 | 12435763 | 12439564 | 3802  | 0.01 | C_unshiu_01712 | 44625  | 40824  | 3802  | 7.31  | 99.71 |
| chr3 | 12442074 | 12445979 | 3906  | 0.01 | C_unshiu_01712 | 37940  | 34039  | 3902  | 7.5   | 98.83 |
| chr3 | 12454490 | 12461946 | 7457  | 0.03 | C_unshiu_00528 | 137737 | 130245 | 7493  | 4.06  | 98.73 |
| chr3 | 12463199 | 12466018 | 2820  | 0.01 | C_unshiu_00528 | 77418  | 74593  | 2826  | 1.53  | 98.8  |
| chr3 | 12477876 | 12479405 | 1530  | 0.01 | C_unshiu_00528 | 114331 | 112800 | 1532  | 0.83  | 99.87 |
| chr3 | 12493043 | 12499280 | 6238  | 0.02 | C_unshiu_00528 | 96831  | 90595  | 6237  | 3.38  | 99.31 |
| chr3 | 12500626 | 12501872 | 1247  | 0    | C_unshiu_00137 | 119472 | 118228 | 1245  | 0.31  | 99.6  |
| chr3 | 12502769 | 12504646 | 1878  | 0.01 | C_unshiu_00528 | 86367  | 84490  | 1878  | 1.02  | 99.79 |
| chr3 | 12504853 | 12509368 | 4516  | 0.02 | C_unshiu_00528 | 81851  | 77335  | 4517  | 2.45  | 99.73 |
| chr3 | 12512689 | 12518153 | 5465  | 0.02 | C_unshiu_00528 | 75098  | 69659  | 5440  | 2.95  | 99.12 |
| chr3 | 12520415 | 12523287 | 2873  | 0.01 | C_unshiu_00528 | 68655  | 65783  | 2873  | 1.56  | 99.97 |
| chr3 | 12532667 | 12546966 | 14300 | 0.05 | C_unshiu_00528 | 57947  | 43563  | 14385 | 7.8   | 98.85 |
| chr3 | 12548619 | 12558073 | 9455  | 0.03 | C_unshiu_00528 | 42675  | 33194  | 9482  | 5.14  | 98.56 |
| chr3 | 12558056 | 12559381 | 1326  | 0    | C_unshiu_01953 | 26616  | 25291  | 1326  | 3.12  | 99.77 |
| chr3 | 12559809 | 12560829 | 1021  | 0    | C_unshiu_00528 | 32789  | 31767  | 1023  | 0.55  | 99.41 |
| chr3 | 12561166 | 12562512 | 1347  | 0    | C_unshiu_01481 | 60447  | 59098  | 1350  | 2.1   | 99.11 |

|      |          |          |       |      |                |         |         |       |       |       |
|------|----------|----------|-------|------|----------------|---------|---------|-------|-------|-------|
| chr3 | 12562927 | 12564408 | 1482  | 0.01 | C_unshiu_01481 | 61960   | 60479   | 1482  | 2.3   | 99.46 |
| chr3 | 12567276 | 12569227 | 1952  | 0.01 | C_unshiu_00528 | 24730   | 22779   | 1952  | 1.06  | 100   |
| chr3 | 12572929 | 12577467 | 4539  | 0.02 | C_unshiu_01481 | 51102   | 46601   | 4502  | 6.99  | 98.68 |
| chr3 | 12581348 | 12582964 | 1617  | 0.01 | C_unshiu_01481 | 43474   | 41855   | 1620  | 2.51  | 98.77 |
| chr3 | 12583682 | 12586230 | 2549  | 0.01 | C_unshiu_00528 | 11942   | 9394    | 2549  | 1.38  | 99.49 |
| chr3 | 12586229 | 12588916 | 2688  | 0.01 | C_unshiu_00528 | 8911    | 6222    | 2690  | 1.46  | 98.7  |
| chr3 | 12589522 | 12590976 | 1455  | 0.01 | C_unshiu_01481 | 24708   | 23254   | 1455  | 2.26  | 100   |
| chr3 | 12591993 | 12604834 | 12842 | 0.05 | C_unshiu_00151 | 189878  | 202735  | 12858 | 3.33  | 99.26 |
| chr3 | 12605517 | 12615339 | 9823  | 0.04 | C_unshiu_00151 | 203705  | 213520  | 9816  | 2.55  | 99.92 |
| chr3 | 12615365 | 12621441 | 6077  | 0.02 | C_unshiu_00151 | 213677  | 219757  | 6081  | 1.58  | 98.38 |
| chr3 | 12623890 | 12625732 | 1843  | 0.01 | C_unshiu_00902 | 74318   | 72474   | 1845  | 1.58  | 99.51 |
| chr3 | 12628251 | 12631081 | 2831  | 0.01 | C_unshiu_00902 | 69334   | 66516   | 2819  | 2.42  | 98.98 |
| chr3 | 12631708 | 12640810 | 9103  | 0.03 | C_unshiu_00902 | 65466   | 56347   | 9120  | 7.82  | 98.97 |
| chr3 | 12640958 | 12650504 | 9547  | 0.03 | C_unshiu_00902 | 56199   | 46627   | 9573  | 8.21  | 98.62 |
| chr3 | 12654518 | 12658915 | 4398  | 0.02 | C_unshiu_00902 | 44320   | 39924   | 4397  | 3.77  | 99.98 |
| chr3 | 12665451 | 12680064 | 14614 | 0.05 | C_unshiu_01898 | 14556   | 1       | 14556 | 32.5  | 98.14 |
| chr3 | 12689868 | 12694214 | 4347  | 0.02 | C_unshiu_00712 | 7881    | 12213   | 4333  | 3.05  | 99.26 |
| chr3 | 12717457 | 12725629 | 8173  | 0.03 | C_unshiu_00712 | 32366   | 40574   | 8209  | 5.77  | 99.07 |
| chr3 | 12725617 | 12737527 | 11911 | 0.04 | C_unshiu_00712 | 40803   | 52823   | 12021 | 8.45  | 98.66 |
| chr3 | 12743594 | 12745847 | 2254  | 0.01 | C_unshiu_00712 | 58592   | 60857   | 2266  | 1.59  | 99.21 |
| chr3 | 12749743 | 12778016 | 28274 | 0.1  | C_unshiu_00712 | 62105   | 90329   | 28225 | 19.85 | 99.29 |
| chr3 | 12800539 | 12810703 | 10165 | 0.04 | C_unshiu_02113 | 36177   | 26061   | 10117 | 27.97 | 98.51 |
| chr3 | 12811091 | 12814243 | 3153  | 0.01 | C_unshiu_02113 | 25658   | 22506   | 3153  | 8.72  | 99.97 |
| chr3 | 12814871 | 12824083 | 9213  | 0.03 | C_unshiu_00712 | 124458  | 133671  | 9214  | 6.48  | 99.9  |
| chr3 | 12824109 | 12827406 | 3298  | 0.01 | C_unshiu_00712 | 134247  | 137544  | 3298  | 2.32  | 100   |
| chr3 | 12834928 | 12838521 | 3594  | 0.01 | C_unshiu_02113 | 19279   | 15685   | 3595  | 9.94  | 99.31 |
| chr3 | 12840103 | 12841244 | 1142  | 0    | C_unshiu_02113 | 13554   | 12410   | 1145  | 3.16  | 99.13 |
| chr3 | 12841236 | 12846846 | 5611  | 0.02 | C_unshiu_02113 | 12332   | 6737    | 5596  | 15.47 | 99.34 |
| chr3 | 12844068 | 12848042 | 3975  | 0.01 | C_unshiu_02113 | 3976    | 1       | 3976  | 10.99 | 98.82 |
| chr3 | 12852320 | 12854030 | 1711  | 0.01 | C_unshiu_00610 | 144942  | 143235  | 1708  | 1.04  | 99.71 |
| chr3 | 12854252 | 12855596 | 1345  | 0    | C_unshiu_00610 | 148005  | 146662  | 1344  | 0.81  | 99.41 |
| chr3 | 12855592 | 12861609 | 6018  | 0.02 | C_unshiu_00610 | 141672  | 135685  | 5988  | 3.63  | 99.2  |
| chr3 | 12867150 | 12875269 | 8120  | 0.03 | C_unshiu_01952 | 1531    | 9606    | 8076  | 18.99 | 99.02 |
| chr3 | 12876387 | 12882391 | 6005  | 0.02 | C_unshiu_01952 | 11154   | 17158   | 6005  | 14.12 | 100   |
| chr3 | 12889438 | 12892151 | 2714  | 0.01 | C_unshiu_01952 | 25190   | 27903   | 2714  | 6.38  | 99.96 |
| chr3 | 12892713 | 12896439 | 3727  | 0.01 | C_unshiu_01675 | 35237   | 31524   | 3714  | 6.89  | 98.69 |
| chr3 | 12898055 | 12900025 | 1971  | 0.01 | C_unshiu_01675 | 29874   | 27904   | 1971  | 3.66  | 100   |
| chr3 | 12900184 | 12912055 | 11872 | 0.04 | C_unshiu_01675 | 27534   | 15678   | 11857 | 22.01 | 99.08 |
| chr3 | 12916921 | 12928385 | 11465 | 0.04 | C_unshiu_00677 | 40732   | 29269   | 11464 | 7.69  | 99.78 |
| chr3 | 12930330 | 12932345 | 2016  | 0.01 | C_unshiu_00677 | 26618   | 24604   | 2015  | 1.35  | 99.06 |
| chr3 | 12941025 | 12952724 | 11700 | 0.04 | C_unshiu_00677 | 24609   | 12964   | 11646 | 7.81  | 98.19 |
| chr3 | 12950271 | 12957889 | 7619  | 0.03 | C_unshiu_01158 | 71367   | 78987   | 7621  | 8.48  | 99.42 |
| chr3 | 12959103 | 12991587 | 32485 | 0.12 | C_unshiu_01158 | 39528   | 71977   | 32450 | 36.09 | 99.87 |
| chr3 | 12992056 | 12996574 | 4519  | 0.02 | C_unshiu_01158 | 33778   | 38282   | 4505  | 5.01  | 99.16 |
| chr3 | 12993904 | 12999527 | 5624  | 0.02 | C_unshiu_00677 | 14116   | 8477    | 5640  | 3.78  | 99.08 |
| chr3 | 12999527 | 13007604 | 8078  | 0.03 | C_unshiu_00677 | 8077    | 1       | 8077  | 5.42  | 99.99 |
| chr3 | 13033394 | 13037410 | 4017  | 0.01 | C_unshiu_00585 | 170501  | 166486  | 4016  | 2.36  | 99.98 |
| chr3 | 13044787 | 13054593 | 9807  | 0.04 | C_unshiu_00585 | 159970  | 150199  | 9772  | 5.73  | 99.11 |
| chr3 | 13079873 | 13081563 | 1691  | 0.01 | C_unshiu_00585 | 80044   | 78354   | 1691  | 0.99  | 98.99 |
| chr3 | 13091938 | 13093448 | 1511  | 0.01 | C_unshiu_00585 | 67671   | 66160   | 1512  | 0.89  | 99.93 |
| chr3 | 13093460 | 13097405 | 3946  | 0.01 | C_unshiu_00585 | 65649   | 61691   | 3959  | 2.32  | 98.99 |
| chr3 | 13102423 | 13132706 | 30284 | 0.11 | C_unshiu_00585 | 61106   | 30814   | 30293 | 17.77 | 98.37 |
| chr3 | 13137337 | 13138518 | 1182  | 0    | C_unshiu_00005 | 1118760 | 1119941 | 1182  | 0.1   | 99.92 |
| chr3 | 13138527 | 13142685 | 4159  | 0.02 | C_unshiu_00005 | 1120124 | 1124278 | 4155  | 0.37  | 99.54 |
| chr3 | 13143297 | 13146318 | 3022  | 0.01 | C_unshiu_00585 | 27140   | 24107   | 3034  | 1.78  | 98.52 |
| chr3 | 13152913 | 13158972 | 6060  | 0.02 | C_unshiu_00585 | 17262   | 11164   | 6099  | 3.58  | 99.11 |
| chr3 | 13158993 | 13162215 | 3223  | 0.01 | C_unshiu_00585 | 11005   | 7783    | 3223  | 1.89  | 99.75 |
| chr3 | 13179283 | 13187513 | 8231  | 0.03 | C_unshiu_01698 | 22257   | 14041   | 8217  | 15.63 | 98.85 |
| chr3 | 13187507 | 13189650 | 2144  | 0.01 | C_unshiu_01713 | 31487   | 33630   | 2144  | 4.13  | 100   |
| chr3 | 13191430 | 13193599 | 2170  | 0.01 | C_unshiu_03031 | 11574   | 9418    | 2157  | 17.88 | 99.26 |
| chr3 | 13193754 | 13197790 | 4037  | 0.01 | C_unshiu_03031 | 9093    | 5057    | 4037  | 33.45 | 100   |
| chr3 | 13199751 | 13201438 | 1688  | 0.01 | C_unshiu_03031 | 2971    | 1284    | 1688  | 13.99 | 100   |
| chr3 | 13200121 | 13201438 | 1318  | 0    | C_unshiu_00005 | 1066371 | 1067691 | 1321  | 0.12  | 99.77 |
| chr3 | 13201887 | 13214224 | 12338 | 0.04 | C_unshiu_00005 | 1068245 | 1080562 | 12318 | 1.09  | 99.8  |
| chr3 | 13214621 | 13216084 | 1464  | 0.01 | C_unshiu_00005 | 1081315 | 1082778 | 1464  | 0.13  | 100   |
| chr3 | 13231862 | 13234570 | 2709  | 0.01 | C_unshiu_02262 | 7958    | 10666   | 2709  | 8.69  | 99.93 |
| chr3 | 13240884 | 13244935 | 4052  | 0.01 | C_unshiu_02262 | 11924   | 15975   | 4052  | 12.99 | 99.61 |
| chr3 | 13243651 | 13247017 | 3367  | 0.01 | C_unshiu_00774 | 104386  | 107730  | 3345  | 2.53  | 98.01 |
| chr3 | 13247524 | 13249486 | 1963  | 0.01 | C_unshiu_02262 | 17995   | 19957   | 1963  | 6.29  | 100   |
| chr3 | 13250899 | 13252015 | 1117  | 0    | C_unshiu_02262 | 21730   | 22846   | 1117  | 3.58  | 100   |
| chr3 | 13255425 | 13256571 | 1147  | 0    | C_unshiu_02262 | 25370   | 26516   | 1147  | 3.68  | 100   |
| chr3 | 13265455 | 13269216 | 3762  | 0.01 | C_unshiu_01549 | 15071   | 18834   | 3764  | 6.21  | 99.89 |
| chr3 | 13272387 | 13276830 | 4444  | 0.02 | C_unshiu_01507 | 53239   | 48786   | 4454  | 7.09  | 98.3  |
| chr3 | 13272387 | 13276830 | 4444  | 0.02 | C_unshiu_01549 | 20166   | 24607   | 4442  | 7.32  | 98.57 |
| chr3 | 13325870 | 13339508 | 13639 | 0.05 | C_unshiu_00167 | 368991  | 355302  | 13690 | 3.71  | 99.61 |
| chr3 | 13339878 | 13342967 | 3090  | 0.01 | C_unshiu_00167 | 354907  | 351818  | 3090  | 0.84  | 99.97 |
| chr3 | 13343324 | 13347420 | 4097  | 0.01 | C_unshiu_00167 | 351101  | 347005  | 4097  | 1.11  | 100   |
| chr3 | 13350344 | 13354358 | 4015  | 0.01 | C_unshiu_00167 | 345291  | 341277  | 4015  | 1.09  | 100   |
| chr3 | 13356145 | 13386306 | 30162 | 0.11 | C_unshiu_00167 | 338913  | 308776  | 30138 | 8.17  | 99.69 |

|      |          |          |       |      |                |        |        |       |       |       |
|------|----------|----------|-------|------|----------------|--------|--------|-------|-------|-------|
| chr3 | 13386565 | 13387949 | 1385  | 0.01 | C_unshiu_00167 | 305595 | 304208 | 1388  | 0.38  | 98.49 |
| chr3 | 13389626 | 13410372 | 20747 | 0.07 | C_unshiu_00167 | 303181 | 282467 | 20715 | 5.61  | 99.16 |
| chr3 | 13410917 | 13424501 | 13585 | 0.05 | C_unshiu_00167 | 282271 | 268709 | 13563 | 3.68  | 98.71 |
| chr3 | 13429470 | 13488343 | 58874 | 0.21 | C_unshiu_00167 | 264184 | 205315 | 58870 | 15.95 | 99.95 |
| chr3 | 13488656 | 13499768 | 11113 | 0.04 | C_unshiu_00167 | 204975 | 193863 | 11113 | 3.01  | 100   |
| chr3 | 13499515 | 13538892 | 39378 | 0.14 | C_unshiu_00167 | 193990 | 154612 | 39379 | 10.67 | 99.92 |
| chr3 | 13545660 | 13573796 | 28137 | 0.1  | C_unshiu_00167 | 147852 | 119715 | 28138 | 7.63  | 99.99 |
| chr3 | 13576645 | 13606215 | 29571 | 0.11 | C_unshiu_00167 | 117465 | 87982  | 29484 | 7.99  | 99.09 |
| chr3 | 13606337 | 13619193 | 12857 | 0.05 | C_unshiu_00040 | 398999 | 386138 | 12862 | 1.95  | 98.89 |
| chr3 | 13621118 | 13630731 | 9614  | 0.03 | C_unshiu_00167 | 84029  | 74416  | 9614  | 2.61  | 99.95 |
| chr3 | 13633382 | 13658675 | 25294 | 0.09 | C_unshiu_00167 | 73134  | 47829  | 25306 | 6.86  | 99.86 |
| chr3 | 13638688 | 13683154 | 44467 | 0.16 | C_unshiu_00167 | 67827  | 23350  | 44478 | 12.05 | 99.98 |
| chr3 | 13689304 | 13691832 | 2529  | 0.01 | C_unshiu_00167 | 19068  | 16540  | 2529  | 0.69  | 99.64 |
| chr3 | 13696396 | 13705333 | 8938  | 0.03 | C_unshiu_00167 | 12795  | 3859   | 8937  | 2.42  | 99.68 |
| chr3 | 13707001 | 13708231 | 1231  | 0    | C_unshiu_00650 | 94360  | 95588  | 1229  | 0.78  | 98.7  |
| chr3 | 13710577 | 13717840 | 7264  | 0.03 | C_unshiu_00650 | 98024  | 105285 | 7262  | 4.64  | 99.83 |
| chr3 | 13720173 | 13721248 | 1076  | 0    | C_unshiu_01391 | 33330  | 34405  | 1076  | 1.52  | 99.72 |
| chr3 | 13721252 | 13722966 | 1715  | 0.01 | C_unshiu_00713 | 5526   | 7231   | 1706  | 1.2   | 98.43 |
| chr3 | 13725084 | 13727210 | 2127  | 0.01 | C_unshiu_00713 | 9928   | 12054  | 2127  | 1.5   | 99.95 |
| chr3 | 13728808 | 13730149 | 1342  | 0    | C_unshiu_01391 | 35153  | 36494  | 1342  | 1.89  | 99.7  |
| chr3 | 13732074 | 13753270 | 21197 | 0.08 | C_unshiu_01391 | 38952  | 60136  | 21185 | 29.86 | 99.68 |
| chr3 | 13762420 | 13774450 | 12031 | 0.04 | C_unshiu_00713 | 15661  | 27672  | 12012 | 8.46  | 98.3  |
| chr3 | 13774445 | 13778741 | 4297  | 0.02 | C_unshiu_00713 | 28577  | 32874  | 4298  | 3.03  | 98.4  |
| chr3 | 13781776 | 13799222 | 17447 | 0.06 | C_unshiu_00713 | 35699  | 53135  | 17437 | 12.28 | 98.14 |
| chr3 | 13793555 | 13811275 | 17721 | 0.06 | C_unshiu_00014 | 1      | 17729  | 17729 | 1.96  | 99.58 |
| chr3 | 13812195 | 13825393 | 13199 | 0.05 | C_unshiu_00014 | 18569  | 31781  | 13213 | 1.46  | 98.91 |
| chr3 | 13830065 | 13831271 | 1207  | 0    | C_unshiu_00713 | 64540  | 65750  | 1211  | 0.85  | 98.93 |
| chr3 | 13832893 | 13843234 | 10342 | 0.04 | C_unshiu_00895 | 101024 | 111361 | 10338 | 8.79  | 99.68 |
| chr3 | 13844589 | 13847834 | 3246  | 0.01 | C_unshiu_00895 | 111361 | 114595 | 3235  | 2.75  | 99.41 |
| chr3 | 13847587 | 13849668 | 2082  | 0.01 | C_unshiu_02315 | 2      | 2069   | 2068  | 7.03  | 98.47 |
| chr3 | 13850371 | 13853337 | 2967  | 0.01 | C_unshiu_02315 | 3022   | 5988   | 2967  | 10.08 | 99.7  |
| chr3 | 13853330 | 13855463 | 2134  | 0.01 | C_unshiu_00106 | 334254 | 336387 | 2134  | 0.47  | 100   |
| chr3 | 13858487 | 13862101 | 3615  | 0.01 | C_unshiu_02315 | 12389  | 16002  | 3614  | 12.28 | 99.75 |
| chr3 | 13862101 | 13863145 | 1045  | 0    | C_unshiu_02315 | 16136  | 17180  | 1045  | 3.55  | 99.81 |
| chr3 | 13863266 | 13868429 | 5164  | 0.02 | C_unshiu_02315 | 17957  | 23088  | 5132  | 17.44 | 98.45 |
| chr3 | 13877241 | 13882446 | 5206  | 0.02 | C_unshiu_00335 | 27822  | 33077  | 5256  | 2.1   | 98.4  |
| chr3 | 13886014 | 13916944 | 30931 | 0.11 | C_unshiu_02186 | 1      | 30834  | 30834 | 91.26 | 99.49 |
| chr3 | 13932176 | 13944692 | 12517 | 0.05 | C_unshiu_01943 | 42969  | 30475  | 12495 | 29.08 | 98.74 |
| chr3 | 13936372 | 13944881 | 8510  | 0.03 | C_unshiu_00977 | 50150  | 41650  | 8501  | 7.81  | 98.2  |
| chr3 | 13946630 | 13953685 | 7056  | 0.03 | C_unshiu_00977 | 39930  | 32875  | 7056  | 6.48  | 100   |
| chr3 | 13956116 | 13958051 | 1936  | 0.01 | C_unshiu_00711 | 96077  | 94142  | 1936  | 1.36  | 99.95 |
| chr3 | 13958042 | 13966510 | 8469  | 0.03 | C_unshiu_00977 | 29467  | 21012  | 8456  | 7.77  | 99.74 |
| chr3 | 13966558 | 13977742 | 11185 | 0.04 | C_unshiu_00977 | 20661  | 9477   | 11185 | 10.27 | 100   |
| chr3 | 13979483 | 13986657 | 7175  | 0.03 | C_unshiu_00977 | 8647   | 1466   | 7182  | 6.6   | 99.01 |
| chr3 | 13982688 | 13996353 | 13666 | 0.05 | C_unshiu_01943 | 22658  | 9041   | 13618 | 31.69 | 98.82 |
| chr3 | 14014670 | 14016199 | 1530  | 0.01 | C_unshiu_01943 | 5017   | 3487   | 1531  | 3.56  | 98.95 |
| chr3 | 14016452 | 14018034 | 1583  | 0.01 | C_unshiu_01530 | 38645  | 40227  | 1583  | 2.57  | 100   |
| chr3 | 14018096 | 14027070 | 8975  | 0.03 | C_unshiu_01530 | 40754  | 49711  | 8958  | 14.54 | 99.67 |
| chr3 | 14035884 | 14056725 | 20842 | 0.08 | C_unshiu_01046 | 101126 | 80302  | 20825 | 20.59 | 99.8  |
| chr3 | 14060839 | 14071088 | 10250 | 0.04 | C_unshiu_01046 | 76966  | 66720  | 10247 | 10.13 | 99.37 |
| chr3 | 14078686 | 14086000 | 7315  | 0.03 | C_unshiu_02671 | 6492   | 13803  | 7312  | 35.68 | 98.57 |
| chr3 | 14099734 | 14101348 | 1615  | 0.01 | C_unshiu_00656 | 71440  | 73054  | 1615  | 1.04  | 100   |
| chr3 | 14105025 | 14115374 | 10350 | 0.04 | C_unshiu_02327 | 29043  | 18693  | 10351 | 35.64 | 99.94 |
| chr3 | 14115910 | 14124223 | 8314  | 0.03 | C_unshiu_02327 | 18773  | 10416  | 8358  | 28.78 | 98.33 |
| chr3 | 14125642 | 14127061 | 1420  | 0.01 | C_unshiu_00356 | 134499 | 135918 | 1420  | 0.6   | 100   |
| chr3 | 14131187 | 14151875 | 20689 | 0.07 | C_unshiu_00356 | 140404 | 161178 | 20775 | 8.75  | 98.8  |
| chr3 | 14172199 | 14194601 | 22403 | 0.08 | C_unshiu_00356 | 174814 | 197234 | 22421 | 9.44  | 98.81 |
| chr3 | 14197375 | 14202196 | 4822  | 0.02 | C_unshiu_00356 | 204452 | 209287 | 4836  | 2.04  | 98.76 |
| chr3 | 14204159 | 14213928 | 9770  | 0.04 | C_unshiu_00356 | 212264 | 222025 | 9762  | 4.11  | 99.5  |
| chr3 | 14230478 | 14239525 | 9048  | 0.03 | C_unshiu_01193 | 66551  | 75493  | 8943  | 10.36 | 98.08 |
| chr3 | 14239626 | 14240651 | 1026  | 0    | C_unshiu_02463 | 20827  | 19800  | 1028  | 3.99  | 99.81 |
| chr3 | 14284095 | 14286086 | 1992  | 0.01 | C_unshiu_01626 | 10700  | 12692  | 1993  | 3.55  | 99.8  |
| chr3 | 14298753 | 14301762 | 3010  | 0.01 | C_unshiu_01626 | 33012  | 36020  | 3009  | 5.35  | 99.44 |
| chr3 | 14301754 | 14310667 | 8914  | 0.03 | C_unshiu_01626 | 36496  | 45409  | 8914  | 15.86 | 99.11 |
| chr3 | 14315201 | 14335211 | 20011 | 0.07 | C_unshiu_00617 | 1      | 20011  | 20011 | 12.23 | 99.93 |
| chr3 | 14335251 | 14342015 | 6765  | 0.02 | C_unshiu_00617 | 19909  | 26673  | 6765  | 4.13  | 100   |
| chr3 | 14347535 | 14349024 | 1490  | 0.01 | C_unshiu_00617 | 32603  | 34090  | 1488  | 0.91  | 99.73 |
| chr3 | 14351138 | 14354511 | 3374  | 0.01 | C_unshiu_00617 | 36610  | 39994  | 3385  | 2.07  | 99.05 |
| chr3 | 14355120 | 14356665 | 1546  | 0.01 | C_unshiu_00617 | 40821  | 42367  | 1547  | 0.95  | 99.61 |
| chr3 | 14355696 | 14360937 | 5242  | 0.02 | C_unshiu_00617 | 42269  | 47511  | 5243  | 3.2   | 99.39 |
| chr3 | 14360025 | 14361265 | 1241  | 0    | C_unshiu_00617 | 47510  | 48748  | 1239  | 0.76  | 99.03 |
| chr3 | 14367121 | 14371974 | 4854  | 0.02 | C_unshiu_00617 | 57078  | 61901  | 4824  | 2.95  | 98.37 |
| chr3 | 14373276 | 14383356 | 10081 | 0.04 | C_unshiu_00621 | 161148 | 151060 | 10089 | 6.19  | 99.63 |
| chr3 | 14383336 | 14385862 | 2527  | 0.01 | C_unshiu_00621 | 150748 | 148222 | 2527  | 1.55  | 99.25 |
| chr3 | 14409999 | 14413884 | 3886  | 0.01 | C_unshiu_00621 | 128331 | 124434 | 3898  | 2.39  | 98.67 |
| chr3 | 14446816 | 14453527 | 6712  | 0.02 | C_unshiu_00621 | 102578 | 95841  | 6738  | 4.14  | 98.75 |
| chr3 | 14455188 | 14457278 | 2091  | 0.01 | C_unshiu_01560 | 9957   | 7864   | 2094  | 3.5   | 99.04 |
| chr3 | 14459184 | 14476862 | 17679 | 0.06 | C_unshiu_00621 | 91809  | 74143  | 17667 | 10.85 | 99.73 |
| chr3 | 14480607 | 14484291 | 3685  | 0.01 | C_unshiu_00621 | 72504  | 68853  | 3652  | 2.24  | 98.97 |

|      |          |          |       |      |                |        |        |       |       |       |
|------|----------|----------|-------|------|----------------|--------|--------|-------|-------|-------|
| chr3 | 14482571 | 14485984 | 3414  | 0.01 | C_unshiu_00692 | 66447  | 69860  | 3414  | 2.35  | 99.27 |
| chr3 | 14491154 | 14509765 | 18612 | 0.07 | C_unshiu_00692 | 74107  | 92743  | 18637 | 12.83 | 99.77 |
| chr3 | 14510897 | 14518755 | 7859  | 0.03 | C_unshiu_00692 | 93225  | 101099 | 7875  | 5.42  | 98.99 |
| chr3 | 14520782 | 14522669 | 1888  | 0.01 | C_unshiu_00692 | 103570 | 105455 | 1886  | 1.3   | 98.57 |
| chr3 | 14527513 | 14529486 | 1974  | 0.01 | C_unshiu_00692 | 108900 | 110873 | 1974  | 1.36  | 98.94 |
| chr3 | 14530794 | 14532042 | 1249  | 0    | C_unshiu_00692 | 112598 | 113847 | 1250  | 0.86  | 99.84 |
| chr3 | 14532847 | 14534904 | 2058  | 0.01 | C_unshiu_00692 | 115589 | 117647 | 2059  | 1.42  | 99.85 |
| chr3 | 14551677 | 14565150 | 13474 | 0.05 | C_unshiu_00692 | 131731 | 145213 | 13483 | 9.28  | 98.91 |
| chr3 | 14560096 | 14571640 | 11545 | 0.04 | C_unshiu_00602 | 167246 | 155689 | 11558 | 6.91  | 98.86 |
| chr3 | 14587958 | 14590301 | 2344  | 0.01 | C_unshiu_00602 | 130511 | 128159 | 2353  | 1.41  | 98.43 |
| chr3 | 14608329 | 14612503 | 4175  | 0.02 | C_unshiu_00602 | 116567 | 112376 | 4192  | 2.51  | 98.81 |
| chr3 | 14612604 | 14614125 | 1522  | 0.01 | C_unshiu_00771 | 76262  | 77783  | 1522  | 1.15  | 100   |
| chr3 | 14614210 | 14634700 | 20491 | 0.07 | C_unshiu_00771 | 77936  | 98445  | 20510 | 15.45 | 99.78 |
| chr3 | 14649855 | 14653533 | 3679  | 0.01 | C_unshiu_00793 | 109339 | 105681 | 3659  | 2.83  | 98.97 |
| chr3 | 14655136 | 14656778 | 1643  | 0.01 | C_unshiu_00793 | 103805 | 102169 | 1637  | 1.27  | 99.39 |
| chr3 | 14663681 | 14669911 | 6231  | 0.02 | C_unshiu_00175 | 264097 | 257865 | 6233  | 1.72  | 99.97 |
| chr3 | 14670140 | 14688787 | 18648 | 0.07 | C_unshiu_00175 | 257091 | 238490 | 18602 | 5.13  | 99.38 |
| chr3 | 14678449 | 14688798 | 10350 | 0.04 | C_unshiu_00175 | 248806 | 238479 | 10328 | 2.85  | 99.75 |
| chr3 | 14690198 | 14698330 | 8133  | 0.03 | C_unshiu_00113 | 54048  | 45916  | 8133  | 1.87  | 99.8  |
| chr3 | 14700220 | 14709976 | 9757  | 0.04 | C_unshiu_00113 | 44881  | 35125  | 9757  | 2.25  | 99.8  |
| chr3 | 14712823 | 14722048 | 9226  | 0.03 | C_unshiu_00113 | 32586  | 23382  | 9205  | 2.12  | 98.7  |
| chr3 | 14724825 | 14737168 | 12344 | 0.04 | C_unshiu_01308 | 12     | 12416  | 12405 | 16.23 | 98.56 |
| chr3 | 14738329 | 14740955 | 2627  | 0.01 | C_unshiu_01308 | 11842  | 14468  | 2627  | 3.44  | 99.7  |
| chr3 | 14740969 | 14743297 | 2329  | 0.01 | C_unshiu_01308 | 15533  | 17861  | 2329  | 3.05  | 100   |
| chr3 | 14751005 | 14752537 | 1533  | 0.01 | C_unshiu_00113 | 4021   | 2489   | 1533  | 0.35  | 100   |
| chr3 | 14752537 | 14754092 | 1556  | 0.01 | C_unshiu_00128 | 276165 | 274610 | 1556  | 0.38  | 100   |
| chr3 | 14758849 | 14760595 | 1747  | 0.01 | C_unshiu_00170 | 252500 | 254246 | 1747  | 0.48  | 100   |
| chr3 | 14760872 | 14768662 | 7791  | 0.03 | C_unshiu_01874 | 43589  | 35804  | 7786  | 17.07 | 99.51 |
| chr3 | 14768663 | 14774113 | 5451  | 0.02 | C_unshiu_01874 | 28249  | 22797  | 5453  | 11.95 | 98.87 |
| chr3 | 14776678 | 14783249 | 6572  | 0.02 | C_unshiu_01308 | 43796  | 50360  | 6565  | 8.59  | 98.45 |
| chr3 | 14777592 | 14783254 | 5663  | 0.02 | C_unshiu_01874 | 20016  | 14350  | 5667  | 12.42 | 98.75 |
| chr3 | 14785678 | 14788373 | 2696  | 0.01 | C_unshiu_01308 | 52756  | 55451  | 2696  | 3.53  | 99.96 |
| chr3 | 14793513 | 14806324 | 12812 | 0.05 | C_unshiu_01308 | 59486  | 72279  | 12794 | 16.73 | 98.96 |
| chr3 | 14806805 | 14808290 | 1486  | 0.01 | C_unshiu_01308 | 73270  | 74755  | 1486  | 1.94  | 99.53 |
| chr3 | 14818049 | 14835320 | 17272 | 0.06 | C_unshiu_01180 | 70072  | 87299  | 17228 | 19.73 | 98.19 |
| chr3 | 14842572 | 14844410 | 1839  | 0.01 | C_unshiu_01368 | 68095  | 69936  | 1842  | 2.52  | 98.81 |
| chr3 | 14844673 | 14845899 | 1227  | 0    | C_unshiu_01368 | 70668  | 71894  | 1227  | 1.68  | 99.84 |
| chr3 | 14874357 | 14878539 | 4183  | 0.02 | C_unshiu_00307 | 24026  | 19848  | 4179  | 1.6   | 99.59 |
| chr3 | 14887265 | 14888821 | 1557  | 0.01 | C_unshiu_01378 | 61951  | 60393  | 1559  | 2.17  | 99.29 |
| chr3 | 14888945 | 14890030 | 1086  | 0    | C_unshiu_01378 | 60182  | 59098  | 1085  | 1.51  | 98.16 |
| chr3 | 14908834 | 14921111 | 12278 | 0.04 | C_unshiu_00515 | 1853   | 14039  | 12187 | 6.53  | 99.13 |
| chr3 | 14931511 | 14936242 | 4732  | 0.02 | C_unshiu_00835 | 54552  | 49822  | 4731  | 3.81  | 99.96 |
| chr3 | 14946531 | 14957768 | 11238 | 0.04 | C_unshiu_01368 | 44886  | 33623  | 11264 | 15.4  | 98.38 |
| chr3 | 14959100 | 14963746 | 4647  | 0.02 | C_unshiu_01368 | 29860  | 25228  | 4633  | 6.33  | 98.52 |
| chr3 | 14972086 | 14975468 | 3383  | 0.01 | C_unshiu_01716 | 47586  | 44199  | 3388  | 6.53  | 99.18 |
| chr3 | 14976016 | 14983980 | 7965  | 0.03 | C_unshiu_01716 | 43184  | 35196  | 7989  | 15.39 | 98.99 |
| chr3 | 14986379 | 14992729 | 6351  | 0.02 | C_unshiu_01368 | 6352   | 4      | 6349  | 8.68  | 98.4  |
| chr3 | 15009173 | 15015337 | 6165  | 0.02 | C_unshiu_03075 | 10240  | 4079   | 6162  | 60.18 | 99.95 |
| chr3 | 15015329 | 15016366 | 1038  | 0    | C_unshiu_00726 | 55059  | 54022  | 1038  | 0.74  | 100   |
| chr3 | 15016367 | 15023781 | 7415  | 0.03 | C_unshiu_01716 | 7439   | 1      | 7439  | 14.33 | 99.68 |
| chr3 | 15025871 | 15056915 | 31045 | 0.11 | C_unshiu_00536 | 1      | 31067  | 31067 | 17.07 | 99.45 |
| chr3 | 15057196 | 15060136 | 2941  | 0.01 | C_unshiu_00536 | 31901  | 34845  | 2945  | 1.62  | 99.05 |
| chr3 | 15059536 | 15064567 | 5032  | 0.02 | C_unshiu_02437 | 7596   | 12585  | 4990  | 18.83 | 98.27 |
| chr3 | 15064571 | 15069062 | 4492  | 0.02 | C_unshiu_00536 | 39217  | 43708  | 4492  | 2.47  | 100   |
| chr3 | 15070342 | 15075409 | 5068  | 0.02 | C_unshiu_02437 | 15824  | 20922  | 5099  | 19.24 | 98.47 |
| chr3 | 15076777 | 15081750 | 4974  | 0.02 | C_unshiu_02437 | 21529  | 26506  | 4978  | 18.78 | 99.56 |
| chr3 | 15084970 | 15123310 | 38341 | 0.14 | C_unshiu_00536 | 54194  | 92536  | 38343 | 21.07 | 99.79 |
| chr3 | 15125529 | 15127906 | 2378  | 0.01 | C_unshiu_03091 | 1      | 2368   | 2368  | 24.47 | 98.87 |
| chr3 | 15128499 | 15131607 | 3109  | 0.01 | C_unshiu_03091 | 3275   | 6369   | 3095  | 31.98 | 98.36 |
| chr3 | 15132232 | 15135071 | 2840  | 0.01 | C_unshiu_03091 | 6855   | 9679   | 2825  | 29.19 | 98.21 |
| chr3 | 15149193 | 15155208 | 6016  | 0.02 | C_unshiu_00480 | 134414 | 140458 | 6045  | 3.05  | 98.23 |
| chr3 | 15155357 | 15156598 | 1242  | 0    | C_unshiu_02600 | 6616   | 7856   | 1241  | 5.62  | 99.68 |
| chr3 | 15157413 | 15164270 | 6858  | 0.02 | C_unshiu_00480 | 142918 | 149780 | 6863  | 3.47  | 98.26 |
| chr3 | 15165459 | 15169059 | 3601  | 0.01 | C_unshiu_00480 | 149791 | 153402 | 3612  | 1.82  | 99.31 |
| chr3 | 15170841 | 15172628 | 1788  | 0.01 | C_unshiu_00480 | 153864 | 155653 | 1790  | 0.9   | 99.89 |
| chr3 | 15173130 | 15183830 | 10701 | 0.04 | C_unshiu_00480 | 156385 | 167092 | 10708 | 5.41  | 98.42 |
| chr3 | 15184952 | 15188338 | 3387  | 0.01 | C_unshiu_00480 | 167860 | 171241 | 3382  | 1.71  | 98.97 |
| chr3 | 15188951 | 15195220 | 6270  | 0.02 | C_unshiu_00480 | 171236 | 177511 | 6276  | 3.17  | 98.89 |
| chr3 | 15188956 | 15195223 | 6268  | 0.02 | C_unshiu_00935 | 106586 | 100302 | 6285  | 5.55  | 98.18 |
| chr3 | 15205548 | 15211535 | 5988  | 0.02 | C_unshiu_00480 | 190179 | 196213 | 6035  | 3.05  | 98.2  |
| chr3 | 15212038 | 15233598 | 21561 | 0.08 | C_unshiu_00935 | 82789  | 61284  | 21506 | 19    | 98.17 |
| chr3 | 15235080 | 15244906 | 9827  | 0.04 | C_unshiu_00935 | 59647  | 49909  | 9739  | 8.6   | 98.13 |
| chr3 | 15246160 | 15259136 | 12977 | 0.05 | C_unshiu_00935 | 48398  | 35380  | 13019 | 11.5  | 98.99 |
| chr3 | 15264179 | 15269633 | 5455  | 0.02 | C_unshiu_00935 | 30601  | 25147  | 5455  | 4.82  | 99.94 |
| chr3 | 15270189 | 15295334 | 25146 | 0.09 | C_unshiu_00935 | 25157  | 1      | 25157 | 22.23 | 99.3  |
| chr3 | 15308316 | 15309335 | 1020  | 0    | C_unshiu_02619 | 7132   | 6112   | 1021  | 4.71  | 99.61 |
| chr3 | 15312855 | 15314643 | 1789  | 0.01 | C_unshiu_02619 | 2941   | 4719   | 1779  | 8.2   | 99    |
| chr3 | 15315973 | 15319706 | 3734  | 0.01 | C_unshiu_00591 | 42190  | 38455  | 3736  | 2.2   | 99.65 |
| chr3 | 15320132 | 15322168 | 2037  | 0.01 | C_unshiu_00591 | 37598  | 35563  | 2036  | 1.2   | 99.95 |

|      |          |          |       |      |                |        |        |       |       |       |
|------|----------|----------|-------|------|----------------|--------|--------|-------|-------|-------|
| chr3 | 15322716 | 15332696 | 9981  | 0.04 | C_unshiu_00591 | 34565  | 24600  | 9966  | 5.88  | 99.44 |
| chr3 | 15330703 | 15343193 | 12491 | 0.05 | C_unshiu_00097 | 30568  | 18146  | 12423 | 2.7   | 98.24 |
| chr3 | 15343905 | 15350486 | 6582  | 0.02 | C_unshiu_00097 | 16429  | 9848   | 6582  | 1.43  | 100   |
| chr3 | 15353302 | 15358760 | 5459  | 0.02 | C_unshiu_00097 | 7636   | 2174   | 5463  | 1.19  | 98.88 |
| chr3 | 15386718 | 15400336 | 13619 | 0.05 | C_unshiu_01224 | 38435  | 52073  | 13639 | 16.37 | 99.47 |
| chr3 | 15402407 | 15412098 | 9692  | 0.04 | C_unshiu_00840 | 121572 | 111879 | 9694  | 7.84  | 99.48 |
| chr3 | 15412255 | 15415828 | 3574  | 0.01 | C_unshiu_00840 | 111871 | 108295 | 3577  | 2.89  | 98.8  |
| chr3 | 15427171 | 15428443 | 1273  | 0    | C_unshiu_00840 | 101172 | 99900  | 1273  | 1.03  | 99.69 |
| chr3 | 15428735 | 15429803 | 1069  | 0    | C_unshiu_00840 | 98785  | 97722  | 1064  | 0.86  | 99.35 |
| chr3 | 15430593 | 15432337 | 1745  | 0.01 | C_unshiu_02448 | 1      | 1724   | 1724  | 6.57  | 98.51 |
| chr3 | 15434482 | 15454650 | 20169 | 0.07 | C_unshiu_02405 | 1901   | 22077  | 20177 | 74.22 | 99.02 |
| chr3 | 15454643 | 15459750 | 5108  | 0.02 | C_unshiu_02405 | 27185  | 22078  | 5108  | 18.79 | 100   |
| chr3 | 15473480 | 15490798 | 17319 | 0.06 | C_unshiu_00739 | 118022 | 100704 | 17319 | 12.56 | 99.95 |
| chr3 | 15504116 | 15510904 | 6789  | 0.02 | C_unshiu_00739 | 88855  | 82125  | 6731  | 4.88  | 98.49 |
| chr3 | 15510906 | 15514229 | 3324  | 0.01 | C_unshiu_00739 | 81958  | 78651  | 3308  | 2.4   | 98.86 |
| chr3 | 15521441 | 15523403 | 1963  | 0.01 | C_unshiu_00818 | 50532  | 48579  | 1954  | 1.54  | 98.93 |
| chr3 | 15523397 | 15525237 | 1841  | 0.01 | C_unshiu_01518 | 24148  | 22308  | 1841  | 2.95  | 100   |
| chr3 | 15526235 | 15544916 | 18682 | 0.07 | C_unshiu_00739 | 74347  | 55679  | 18669 | 13.54 | 99.66 |
| chr3 | 15563726 | 15573082 | 9357  | 0.03 | C_unshiu_00739 | 41395  | 31999  | 9397  | 6.82  | 98.7  |
| chr3 | 15581804 | 15584037 | 2234  | 0.01 | C_unshiu_00739 | 19306  | 17075  | 2232  | 1.62  | 98.44 |
| chr3 | 15586917 | 15596761 | 9845  | 0.04 | C_unshiu_00421 | 70878  | 60957  | 9922  | 4.54  | 98.33 |
| chr3 | 15605618 | 15606624 | 1007  | 0    | C_unshiu_00313 | 61142  | 60139  | 1004  | 0.39  | 99.21 |
| chr3 | 15610091 | 15612404 | 2314  | 0.01 | C_unshiu_00313 | 56370  | 54077  | 2294  | 0.89  | 98.75 |
| chr3 | 15616277 | 15653275 | 36999 | 0.13 | C_unshiu_00313 | 50720  | 13927  | 36794 | 14.21 | 98.91 |
| chr3 | 15649047 | 15658024 | 8978  | 0.03 | C_unshiu_01764 | 35042  | 44018  | 8977  | 18    | 98.42 |
| chr3 | 15658038 | 15659668 | 1631  | 0.01 | C_unshiu_01764 | 44261  | 45890  | 1630  | 3.27  | 99.94 |
| chr3 | 15676812 | 15682852 | 6041  | 0.02 | C_unshiu_02731 | 19296  | 13255  | 6042  | 31.31 | 99.92 |
| chr3 | 15682927 | 15687656 | 4730  | 0.02 | C_unshiu_02731 | 12978  | 8256   | 4723  | 24.48 | 99.85 |
| chr3 | 15687721 | 15693290 | 5570  | 0.02 | C_unshiu_02731 | 7845   | 2304   | 5542  | 28.72 | 99.26 |
| chr3 | 15709290 | 15731422 | 22133 | 0.08 | C_unshiu_00415 | 105776 | 127915 | 22140 | 10.04 | 99.87 |
| chr3 | 15752596 | 15760714 | 8119  | 0.03 | C_unshiu_02357 | 19817  | 27923  | 8107  | 28.72 | 99.85 |
| chr3 | 15761717 | 15782540 | 20824 | 0.08 | C_unshiu_02474 | 1      | 20826  | 20826 | 81.89 | 99.35 |
| chr3 | 15783527 | 15787814 | 4288  | 0.02 | C_unshiu_02474 | 21145  | 25432  | 4288  | 16.86 | 100   |
| chr3 | 15789528 | 15798815 | 9288  | 0.03 | C_unshiu_02551 | 23225  | 13919  | 9307  | 40.06 | 99.36 |
| chr3 | 15801511 | 15806043 | 4533  | 0.02 | C_unshiu_02551 | 11707  | 7175   | 4533  | 19.51 | 99.89 |
| chr3 | 15808347 | 15814673 | 6327  | 0.02 | C_unshiu_02551 | 6325   | 1      | 6325  | 27.23 | 99.75 |
| chr3 | 15811181 | 15816699 | 5519  | 0.02 | C_unshiu_02707 | 14264  | 19748  | 5485  | 27.77 | 98.73 |
| chr3 | 15818489 | 15821651 | 3163  | 0.01 | C_unshiu_01016 | 8455   | 5281   | 3175  | 3.04  | 98.31 |
| chr3 | 15856276 | 15857731 | 1456  | 0.01 | C_unshiu_01266 | 6043   | 7492   | 1450  | 1.82  | 98.56 |
| chr3 | 15861331 | 15865801 | 4471  | 0.02 | C_unshiu_00723 | 81541  | 77058  | 4484  | 3.2   | 99.38 |
| chr3 | 15868681 | 15879136 | 10456 | 0.04 | C_unshiu_01266 | 9419   | 19835  | 10417 | 13.08 | 99.02 |
| chr3 | 15875963 | 15889066 | 13104 | 0.05 | C_unshiu_00723 | 66887  | 53783  | 13105 | 9.34  | 98.96 |
| chr3 | 15897153 | 15911037 | 13885 | 0.05 | C_unshiu_00948 | 1      | 13906  | 13906 | 12.44 | 99.04 |
| chr3 | 15909545 | 15913420 | 3876  | 0.01 | C_unshiu_01266 | 54926  | 58800  | 3875  | 4.86  | 99.17 |
| chr3 | 15914458 | 15918399 | 3942  | 0.01 | C_unshiu_01266 | 60303  | 64237  | 3935  | 4.94  | 98.18 |
| chr3 | 15918421 | 15929176 | 10756 | 0.04 | C_unshiu_01266 | 64684  | 75396  | 10713 | 13.45 | 99.02 |
| chr3 | 15947100 | 15956165 | 9066  | 0.03 | C_unshiu_01813 | 48084  | 39019  | 9066  | 18.85 | 99.89 |
| chr3 | 15961297 | 15967490 | 6194  | 0.02 | C_unshiu_01813 | 33964  | 27800  | 6165  | 12.82 | 98.74 |
| chr3 | 15969107 | 15972439 | 3333  | 0.01 | C_unshiu_01813 | 25453  | 22122  | 3332  | 6.93  | 99.19 |
| chr3 | 15972465 | 15974755 | 2291  | 0.01 | C_unshiu_00173 | 156696 | 154416 | 2281  | 0.63  | 98.22 |
| chr3 | 15974823 | 15981402 | 6580  | 0.02 | C_unshiu_00173 | 153836 | 147265 | 6572  | 1.8   | 99.7  |
| chr3 | 15981943 | 15988699 | 6757  | 0.02 | C_unshiu_00173 | 146331 | 139575 | 6757  | 1.85  | 100   |
| chr3 | 15989908 | 15999421 | 9514  | 0.03 | C_unshiu_01813 | 21446  | 11925  | 9522  | 19.8  | 99.67 |
| chr3 | 1599457  | 16003573 | 4117  | 0.01 | C_unshiu_01813 | 11658  | 7545   | 4114  | 8.56  | 99.93 |
| chr3 | 16003591 | 16027632 | 24042 | 0.09 | C_unshiu_00173 | 133662 | 109658 | 24005 | 6.58  | 99.42 |
| chr3 | 16024267 | 16032928 | 8662  | 0.03 | C_unshiu_01813 | 8641   | 1      | 8641  | 17.97 | 98.34 |
| chr3 | 16033134 | 16034664 | 1531  | 0.01 | C_unshiu_00173 | 106338 | 104805 | 1534  | 0.42  | 99.22 |
| chr3 | 16035616 | 16039260 | 3645  | 0.01 | C_unshiu_00173 | 102367 | 98722  | 3646  | 1     | 98.22 |
| chr3 | 16041051 | 16053219 | 12169 | 0.04 | C_unshiu_00173 | 95953  | 83756  | 12198 | 3.34  | 98.69 |
| chr3 | 16062890 | 16068407 | 5518  | 0.02 | C_unshiu_00173 | 81943  | 76409  | 5535  | 1.52  | 98.65 |
| chr3 | 16068628 | 16072150 | 3523  | 0.01 | C_unshiu_00173 | 76169  | 72642  | 3528  | 0.97  | 99.12 |
| chr3 | 16085663 | 16087659 | 1997  | 0.01 | C_unshiu_00173 | 59747  | 57751  | 1997  | 0.55  | 99.2  |
| chr3 | 16087657 | 16094499 | 6843  | 0.02 | C_unshiu_00173 | 57303  | 50486  | 6818  | 1.87  | 98.23 |
| chr3 | 16140537 | 16143338 | 2802  | 0.01 | C_unshiu_00173 | 14368  | 11564  | 2805  | 0.77  | 98    |
| chr3 | 16152054 | 16158498 | 6445  | 0.02 | C_unshiu_02226 | 20993  | 27426  | 6434  | 19.89 | 99.36 |
| chr3 | 16158514 | 16161607 | 3094  | 0.01 | C_unshiu_02226 | 28499  | 31591  | 3093  | 9.56  | 99.94 |
| chr3 | 16162780 | 16164374 | 1595  | 0.01 | C_unshiu_00020 | 83839  | 82239  | 1601  | 0.2   | 98.69 |
| chr3 | 16167767 | 16172167 | 4401  | 0.02 | C_unshiu_00566 | 163454 | 167851 | 4398  | 2.52  | 98.01 |
| chr3 | 16191146 | 16192161 | 1016  | 0    | C_unshiu_00648 | 142902 | 141885 | 1018  | 0.65  | 99.61 |
| chr3 | 16202843 | 16208866 | 6024  | 0.02 | C_unshiu_02704 | 13758  | 19785  | 6028  | 30.47 | 98.79 |
| chr3 | 16213932 | 16215471 | 1540  | 0.01 | C_unshiu_02998 | 11975  | 10436  | 1540  | 11.87 | 100   |
| chr3 | 16215539 | 16220825 | 5287  | 0.02 | C_unshiu_02998 | 10307  | 4944   | 5364  | 41.35 | 98.49 |
| chr3 | 16220932 | 16222526 | 1595  | 0.01 | C_unshiu_02998 | 4949   | 3355   | 1595  | 12.29 | 100   |
| chr3 | 16232528 | 16237299 | 4772  | 0.02 | C_unshiu_01792 | 10836  | 15609  | 4774  | 9.8   | 99.48 |
| chr3 | 16237321 | 16240556 | 3236  | 0.01 | C_unshiu_01792 | 7523   | 10757  | 3235  | 6.64  | 99.54 |
| chr3 | 16245935 | 16267541 | 21607 | 0.08 | C_unshiu_01792 | 15805  | 37427  | 21623 | 44.37 | 99.06 |
| chr3 | 16269643 | 16279976 | 10334 | 0.04 | C_unshiu_01792 | 37822  | 48141  | 10320 | 21.18 | 98.18 |
| chr3 | 16279968 | 16288735 | 8768  | 0.03 | C_unshiu_01465 | 14182  | 5391   | 8792  | 13.41 | 99.18 |
| chr3 | 16291005 | 16294431 | 3427  | 0.01 | C_unshiu_01465 | 4023   | 606    | 3418  | 5.21  | 98.55 |

|      |          |           |       |      |                |        |        |       |       |       |
|------|----------|-----------|-------|------|----------------|--------|--------|-------|-------|-------|
| chr3 | 16302216 | 16303749  | 1534  | 0.01 | C_unshiu_00474 | 15321  | 13788  | 1534  | 0.76  | 100   |
| chr3 | 16309210 | 16314778  | 5569  | 0.02 | C_unshiu_00618 | 160886 | 155317 | 5570  | 3.41  | 99.96 |
| chr3 | 16338538 | 16340898  | 2361  | 0.01 | C_unshiu_00618 | 133952 | 131595 | 2358  | 1.44  | 99.58 |
| chr3 | 16341503 | 16347273  | 5771  | 0.02 | C_unshiu_00220 | 238758 | 232988 | 5771  | 1.83  | 99.31 |
| chr3 | 16345590 | 16347314  | 1725  | 0.01 | C_unshiu_00220 | 223921 | 225645 | 1725  | 0.55  | 99.25 |
| chr3 | 16347410 | 164148674 | 1265  | 0    | C_unshiu_00618 | 126655 | 125391 | 1265  | 0.77  | 98.97 |
| chr3 | 16349259 | 16352214  | 2956  | 0.01 | C_unshiu_00618 | 124199 | 121243 | 2957  | 1.81  | 99.43 |
| chr3 | 16355490 | 16359652  | 4163  | 0.02 | C_unshiu_00618 | 119512 | 115348 | 4165  | 2.55  | 98.37 |
| chr3 | 16376898 | 16379014  | 2117  | 0.01 | C_unshiu_00618 | 98451  | 96302  | 2150  | 1.32  | 98.28 |
| chr3 | 16379015 | 16380966  | 1952  | 0.01 | C_unshiu_00266 | 273607 | 271656 | 1952  | 0.69  | 100   |
| chr3 | 16380959 | 16388983  | 8025  | 0.03 | C_unshiu_00618 | 89948  | 81916  | 8033  | 4.91  | 99.13 |
| chr3 | 16388985 | 16399462  | 10478 | 0.04 | C_unshiu_00618 | 81791  | 71293  | 10499 | 6.42  | 98.64 |
| chr3 | 16400537 | 16407596  | 7060  | 0.03 | C_unshiu_00618 | 69420  | 62346  | 7075  | 4.33  | 98.72 |
| chr3 | 16407625 | 16414484  | 6860  | 0.02 | C_unshiu_00618 | 62373  | 55518  | 6856  | 4.19  | 99    |
| chr3 | 16427665 | 16428848  | 1184  | 0    | C_unshiu_02623 | 8057   | 6873   | 1185  | 5.48  | 98.74 |
| chr3 | 16432117 | 16439608  | 7492  | 0.03 | C_unshiu_00618 | 42460  | 34931  | 7530  | 4.61  | 98.17 |
| chr3 | 16439602 | 16450354  | 10753 | 0.04 | C_unshiu_00618 | 26960  | 16213  | 10748 | 6.57  | 98.61 |
| chr3 | 16450803 | 16466653  | 15851 | 0.06 | C_unshiu_00618 | 15875  | 1      | 15875 | 9.71  | 98.83 |
| chr3 | 16469572 | 16474325  | 4754  | 0.02 | C_unshiu_00095 | 180387 | 185150 | 4764  | 1.03  | 99.22 |
| chr3 | 16474342 | 16476268  | 1927  | 0.01 | C_unshiu_00095 | 185028 | 186953 | 1926  | 0.41  | 99.84 |
| chr3 | 16477116 | 16480524  | 3409  | 0.01 | C_unshiu_00095 | 187908 | 191315 | 3408  | 0.73  | 99.68 |
| chr3 | 16481089 | 16483177  | 2089  | 0.01 | C_unshiu_00095 | 192146 | 194233 | 2088  | 0.45  | 98.42 |
| chr3 | 16491642 | 16495811  | 4170  | 0.02 | C_unshiu_00095 | 200470 | 204638 | 4169  | 0.9   | 99.76 |
| chr3 | 16495957 | 16497277  | 1321  | 0    | C_unshiu_00095 | 205550 | 206871 | 1322  | 0.28  | 99.09 |
| chr3 | 16497273 | 16499937  | 2665  | 0.01 | C_unshiu_00095 | 206921 | 209586 | 2666  | 0.57  | 99.89 |
| chr3 | 16500359 | 16502709  | 2351  | 0.01 | C_unshiu_00095 | 210307 | 212654 | 2348  | 0.51  | 99.23 |
| chr3 | 16505049 | 16520430  | 15382 | 0.06 | C_unshiu_00095 | 215134 | 230490 | 15357 | 3.31  | 99.45 |
| chr3 | 16522044 | 16546980  | 24937 | 0.09 | C_unshiu_00095 | 232760 | 257631 | 24872 | 5.35  | 99.03 |
| chr3 | 16546983 | 16550876  | 3894  | 0.01 | C_unshiu_00095 | 257132 | 261029 | 3898  | 0.84  | 99.28 |
| chr3 | 16552864 | 16557262  | 4399  | 0.02 | C_unshiu_00095 | 261223 | 265638 | 4416  | 0.95  | 99.37 |
| chr3 | 16557477 | 16561580  | 4104  | 0.01 | C_unshiu_00095 | 266309 | 270424 | 4116  | 0.89  | 99.13 |
| chr3 | 16561585 | 16563626  | 2042  | 0.01 | C_unshiu_00095 | 270997 | 273039 | 2043  | 0.44  | 99.56 |
| chr3 | 16569691 | 16577377  | 7687  | 0.03 | C_unshiu_00095 | 280272 | 287944 | 7673  | 1.65  | 99.41 |
| chr3 | 16577375 | 16593837  | 16463 | 0.06 | C_unshiu_00095 | 287996 | 304476 | 16481 | 3.55  | 98.68 |
| chr3 | 16597384 | 16602192  | 4809  | 0.02 | C_unshiu_00095 | 305575 | 310375 | 4801  | 1.03  | 99.11 |
| chr3 | 16602201 | 16619430  | 17230 | 0.06 | C_unshiu_00095 | 312721 | 329939 | 17219 | 3.71  | 99.26 |
| chr3 | 16622329 | 16630633  | 8305  | 0.03 | C_unshiu_00095 | 332191 | 340492 | 8302  | 1.79  | 99.37 |
| chr3 | 16631058 | 16637274  | 6217  | 0.02 | C_unshiu_00095 | 340484 | 346703 | 6220  | 1.34  | 98.36 |
| chr3 | 16648171 | 16666810  | 18640 | 0.07 | C_unshiu_00095 | 349166 | 367863 | 18698 | 4.03  | 98.51 |
| chr3 | 16674759 | 16687953  | 13195 | 0.05 | C_unshiu_00095 | 375905 | 389100 | 13196 | 2.84  | 99.13 |
| chr3 | 16689981 | 16702319  | 12339 | 0.04 | C_unshiu_00095 | 391547 | 403855 | 12309 | 2.65  | 99.47 |
| chr3 | 16702917 | 16713693  | 10777 | 0.04 | C_unshiu_00095 | 404915 | 415716 | 10802 | 2.33  | 99.19 |
| chr3 | 16716017 | 16721898  | 5882  | 0.02 | C_unshiu_00095 | 419029 | 424914 | 5886  | 1.27  | 99.64 |
| chr3 | 16738061 | 16743208  | 5148  | 0.02 | C_unshiu_01810 | 33996  | 39164  | 5169  | 10.72 | 99.05 |
| chr3 | 16745608 | 16746958  | 1351  | 0    | C_unshiu_01222 | 8282   | 9640   | 1359  | 1.63  | 99.41 |
| chr3 | 16747303 | 16749267  | 1965  | 0.01 | C_unshiu_01222 | 9997   | 11964  | 1968  | 2.36  | 99.7  |
| chr3 | 16751460 | 16752951  | 1492  | 0.01 | C_unshiu_01670 | 3094   | 1600   | 1495  | 2.76  | 99.2  |
| chr3 | 16755263 | 16756262  | 1000  | 0    | C_unshiu_01357 | 1576   | 2575   | 1000  | 1.36  | 100   |
| chr3 | 16756263 | 16758291  | 2029  | 0.01 | C_unshiu_00575 | 24712  | 26740  | 2029  | 1.18  | 100   |
| chr3 | 16758282 | 16760604  | 2323  | 0.01 | C_unshiu_01357 | 4877   | 7199   | 2323  | 3.15  | 100   |
| chr3 | 16762200 | 16763827  | 1628  | 0.01 | C_unshiu_01357 | 9245   | 10872  | 1628  | 2.21  | 100   |
| chr3 | 16764569 | 16772819  | 8251  | 0.03 | C_unshiu_01357 | 11826  | 20076  | 8251  | 11.2  | 99.87 |
| chr3 | 16791350 | 16795395  | 4046  | 0.01 | C_unshiu_03016 | 12496  | 8452   | 4045  | 32.37 | 99.93 |
| chr3 | 16796142 | 16799364  | 3223  | 0.01 | C_unshiu_03016 | 7144   | 3922   | 3223  | 25.79 | 100   |
| chr3 | 16799896 | 16801249  | 1354  | 0    | C_unshiu_03016 | 3061   | 1708   | 1354  | 10.84 | 98.68 |
| chr3 | 16802133 | 16803379  | 1247  | 0    | C_unshiu_03016 | 1245   | 1      | 1245  | 9.96  | 99.36 |
| chr3 | 16815628 | 16816777  | 1150  | 0    | C_unshiu_00389 | 56148  | 54998  | 1151  | 0.51  | 99.3  |
| chr3 | 16820951 | 16837591  | 16641 | 0.06 | C_unshiu_00181 | 352587 | 335936 | 16652 | 4.67  | 99.07 |
| chr3 | 16841757 | 16845753  | 3997  | 0.01 | C_unshiu_01319 | 73654  | 69637  | 4018  | 5.32  | 98.41 |
| chr3 | 16861270 | 16867400  | 6131  | 0.02 | C_unshiu_00181 | 314200 | 308066 | 6135  | 1.72  | 98.8  |
| chr3 | 16868922 | 16883239  | 14318 | 0.05 | C_unshiu_00181 | 306156 | 291852 | 14305 | 4.01  | 98.95 |
| chr3 | 16887442 | 16892972  | 5531  | 0.02 | C_unshiu_00181 | 285932 | 280413 | 5520  | 1.55  | 98.66 |
| chr3 | 16889463 | 16893374  | 3912  | 0.01 | C_unshiu_01896 | 5993   | 9914   | 3922  | 8.74  | 98.52 |
| chr3 | 16893370 | 16896969  | 3600  | 0.01 | C_unshiu_01926 | 10490  | 14089  | 3600  | 8.21  | 100   |
| chr3 | 16897111 | 16898641  | 1531  | 0.01 | C_unshiu_01802 | 28716  | 27186  | 1531  | 3.16  | 100   |
| chr3 | 16898635 | 16900459  | 1825  | 0.01 | C_unshiu_00181 | 275192 | 273374 | 1819  | 0.51  | 99.34 |
| chr3 | 16900854 | 16902604  | 1751  | 0.01 | C_unshiu_00181 | 272696 | 270946 | 1751  | 0.49  | 99.94 |
| chr3 | 16902874 | 16910714  | 7841  | 0.03 | C_unshiu_00181 | 270346 | 262520 | 7827  | 2.19  | 98.94 |
| chr3 | 16914335 | 16917855  | 3521  | 0.01 | C_unshiu_01698 | 50150  | 46641  | 3510  | 6.68  | 98.5  |
| chr3 | 16917855 | 16919947  | 2093  | 0.01 | C_unshiu_01698 | 46706  | 44614  | 2093  | 3.98  | 100   |
| chr3 | 16935924 | 16938191  | 2268  | 0.01 | C_unshiu_01097 | 50334  | 52585  | 2252  | 2.34  | 98.15 |
| chr3 | 16962925 | 16965022  | 2098  | 0.01 | C_unshiu_02260 | 6157   | 8254   | 2098  | 6.72  | 99.67 |
| chr3 | 16966559 | 16973013  | 6455  | 0.02 | C_unshiu_00059 | 65008  | 58553  | 6456  | 1.1   | 99.98 |
| chr3 | 16973181 | 16975409  | 2229  | 0.01 | C_unshiu_00059 | 58265  | 56044  | 2222  | 0.38  | 99.37 |
| chr3 | 16977576 | 16979400  | 1825  | 0.01 | C_unshiu_00285 | 256444 | 258268 | 1825  | 0.67  | 100   |
| chr3 | 16982363 | 16983703  | 1341  | 0    | C_unshiu_00285 | 259650 | 260991 | 1342  | 0.49  | 99.93 |
| chr3 | 17002962 | 17008761  | 5800  | 0.02 | C_unshiu_01474 | 49314  | 43541  | 5774  | 8.9   | 99.22 |
| chr3 | 17014002 | 17016563  | 2562  | 0.01 | C_unshiu_02951 | 1      | 2575   | 2575  | 17.79 | 99.38 |
| chr3 | 17038615 | 17047638  | 9024  | 0.03 | C_unshiu_01494 | 63533  | 54485  | 9049  | 14.24 | 98.03 |

|      |          |          |       |      |                |        |        |       |       |       |
|------|----------|----------|-------|------|----------------|--------|--------|-------|-------|-------|
| chr3 | 17057722 | 17071219 | 13498 | 0.05 | C_unshiu_01494 | 47481  | 34017  | 13465 | 21.19 | 98.26 |
| chr3 | 17073462 | 17079286 | 5825  | 0.02 | C_unshiu_00536 | 181712 | 175916 | 5797  | 3.19  | 98.21 |
| chr3 | 17082352 | 17083502 | 1151  | 0    | C_unshiu_00536 | 174940 | 173788 | 1153  | 0.63  | 99.13 |
| chr3 | 17086673 | 17123705 | 37033 | 0.13 | C_unshiu_00536 | 170781 | 133564 | 37218 | 20.45 | 98.06 |
| chr3 | 17124412 | 17140380 | 15969 | 0.06 | C_unshiu_00536 | 132386 | 116392 | 15995 | 8.79  | 99.34 |
| chr3 | 17163529 | 17183311 | 19783 | 0.07 | C_unshiu_01915 | 44188  | 24401  | 19788 | 44.78 | 99.94 |
| chr3 | 17184823 | 17186558 | 1736  | 0.01 | C_unshiu_00147 | 338383 | 336648 | 1736  | 0.45  | 100   |
| chr3 | 17189052 | 17196688 | 7637  | 0.03 | C_unshiu_01915 | 19803  | 12167  | 7637  | 17.28 | 100   |
| chr3 | 17196789 | 17198217 | 1429  | 0.01 | C_unshiu_00259 | 72053  | 73481  | 1429  | 0.5   | 99.93 |
| chr3 | 17198265 | 17204238 | 5974  | 0.02 | C_unshiu_00259 | 74390  | 80363  | 5974  | 2.08  | 99.95 |
| chr3 | 17205840 | 17247243 | 41404 | 0.15 | C_unshiu_00259 | 82356  | 123777 | 41422 | 14.43 | 99.87 |
| chr3 | 17259313 | 17263230 | 3918  | 0.01 | C_unshiu_01368 | 67407  | 63489  | 3919  | 5.36  | 99.01 |
| chr3 | 17259313 | 17263230 | 3918  | 0.01 | C_unshiu_02452 | 177    | 4092   | 3916  | 14.98 | 99.08 |
| chr3 | 17273867 | 17276984 | 3118  | 0.01 | C_unshiu_00431 | 93093  | 96210  | 3118  | 1.45  | 99.68 |
| chr3 | 17276985 | 17282925 | 5941  | 0.02 | C_unshiu_00360 | 44975  | 50915  | 5941  | 2.51  | 100   |
| chr3 | 17286211 | 17289735 | 3525  | 0.01 | C_unshiu_00431 | 113014 | 116565 | 3552  | 1.65  | 98.73 |
| chr3 | 17289772 | 17303466 | 13695 | 0.05 | C_unshiu_00431 | 115960 | 129657 | 13698 | 6.38  | 99.26 |
| chr3 | 17311416 | 17319508 | 8093  | 0.03 | C_unshiu_00431 | 130802 | 138909 | 8108  | 3.78  | 98.56 |
| chr3 | 17319509 | 17330481 | 10973 | 0.04 | C_unshiu_00431 | 139150 | 150126 | 10977 | 5.11  | 99.19 |
| chr3 | 17330475 | 17334062 | 3588  | 0.01 | C_unshiu_00431 | 151008 | 154621 | 3614  | 1.68  | 98.42 |
| chr3 | 17342596 | 17345283 | 2688  | 0.01 | C_unshiu_01507 | 38503  | 35816  | 2688  | 4.28  | 100   |
| chr3 | 17347793 | 17351518 | 3726  | 0.01 | C_unshiu_00431 | 168805 | 172553 | 3749  | 1.75  | 98.88 |
| chr3 | 17358741 | 17364420 | 5680  | 0.02 | C_unshiu_01507 | 12203  | 6521   | 5683  | 9.05  | 99.45 |
| chr3 | 17376840 | 17436806 | 59967 | 0.22 | C_unshiu_00564 | 64796  | 4829   | 59968 | 34.29 | 99.96 |
| chr3 | 17436907 | 17444184 | 7278  | 0.03 | C_unshiu_01143 | 4924   | 12208  | 7285  | 7.94  | 99.73 |
| chr3 | 17445305 | 17449164 | 3860  | 0.01 | C_unshiu_01143 | 13904  | 17749  | 3846  | 4.19  | 98.76 |
| chr3 | 17452054 | 17454023 | 1970  | 0.01 | C_unshiu_01143 | 17236  | 19210  | 1975  | 2.15  | 99.39 |
| chr3 | 17455721 | 17457170 | 1450  | 0.01 | C_unshiu_01143 | 21474  | 22929  | 1456  | 1.59  | 98.83 |
| chr3 | 17463719 | 17465859 | 2141  | 0.01 | C_unshiu_01143 | 14345  | 12210  | 2136  | 2.33  | 98.93 |
| chr3 | 17466051 | 17490282 | 24232 | 0.09 | C_unshiu_01566 | 1      | 24205  | 24205 | 40.76 | 99.76 |
| chr3 | 17500163 | 17522703 | 22541 | 0.08 | C_unshiu_01566 | 34141  | 56692  | 22552 | 37.98 | 99.51 |
| chr3 | 17526744 | 17566521 | 39778 | 0.14 | C_unshiu_01239 | 56226  | 16546  | 39681 | 48.54 | 99.49 |
| chr3 | 17546519 | 17577938 | 31420 | 0.11 | C_unshiu_01239 | 36541  | 5132   | 31410 | 38.42 | 99.96 |
| chr3 | 17584540 | 17586102 | 1563  | 0.01 | C_unshiu_00011 | 899744 | 898181 | 1564  | 0.16  | 99.36 |
| chr3 | 17589510 | 17625994 | 36485 | 0.13 | C_unshiu_00011 | 894458 | 857967 | 36492 | 3.77  | 99.63 |
| chr3 | 17626599 | 17644122 | 17524 | 0.06 | C_unshiu_00011 | 856905 | 839382 | 17524 | 1.81  | 99.98 |
| chr3 | 17650412 | 17690744 | 40333 | 0.15 | C_unshiu_00011 | 833224 | 792882 | 40343 | 4.17  | 99.85 |
| chr3 | 17693078 | 17694087 | 1010  | 0    | C_unshiu_02049 | 34852  | 33843  | 1010  | 2.61  | 100   |
| chr3 | 17710113 | 17711941 | 1829  | 0.01 | C_unshiu_02049 | 16334  | 14513  | 1822  | 4.71  | 98.85 |
| chr3 | 17716588 | 17718554 | 1967  | 0.01 | C_unshiu_00783 | 117995 | 116029 | 1967  | 1.51  | 100   |
| chr3 | 17718548 | 17722362 | 3815  | 0.01 | C_unshiu_00822 | 49980  | 53794  | 3815  | 3.02  | 99.97 |
| chr3 | 17727191 | 17730875 | 3685  | 0.01 | C_unshiu_02689 | 9226   | 5541   | 3686  | 18.33 | 99.54 |
| chr3 | 17763771 | 17767037 | 3267  | 0.01 | C_unshiu_00822 | 93532  | 96834  | 3303  | 2.62  | 98.18 |
| chr3 | 17785355 | 17791986 | 6632  | 0.02 | C_unshiu_00822 | 115729 | 122360 | 6632  | 5.26  | 99.97 |
| chr3 | 17792103 | 17793646 | 1544  | 0.01 | C_unshiu_00822 | 122697 | 124227 | 1531  | 1.21  | 98.96 |
| chr3 | 17800913 | 17803152 | 2240  | 0.01 | C_unshiu_01423 | 68907  | 66668  | 2240  | 3.25  | 99.24 |
| chr3 | 17804858 | 17811773 | 6916  | 0.02 | C_unshiu_01423 | 63853  | 56939  | 6915  | 10.04 | 99.75 |
| chr3 | 17826235 | 17827453 | 1219  | 0    | C_unshiu_02761 | 15325  | 14118  | 1208  | 6.4   | 98.77 |
| chr3 | 17829562 | 17841227 | 11666 | 0.04 | C_unshiu_02761 | 11677  | 1      | 11677 | 61.83 | 99.64 |
| chr3 | 17864648 | 17867394 | 2747  | 0.01 | C_unshiu_01571 | 39093  | 41840  | 2748  | 4.65  | 98.69 |
| chr3 | 17872831 | 17877013 | 4183  | 0.02 | C_unshiu_01571 | 41119  | 45249  | 4131  | 6.99  | 98.23 |
| chr3 | 17874106 | 17885672 | 11567 | 0.04 | C_unshiu_01423 | 21040  | 9491   | 11550 | 16.76 | 98.97 |
| chr3 | 17902658 | 17945330 | 42673 | 0.15 | C_unshiu_01155 | 66930  | 24120  | 42811 | 47.56 | 98.74 |
| chr3 | 17945720 | 17956646 | 10927 | 0.04 | C_unshiu_01155 | 23481  | 12545  | 10937 | 12.15 | 98.37 |
| chr3 | 17981258 | 18009680 | 28423 | 0.1  | C_unshiu_00767 | 133388 | 104966 | 28423 | 21.31 | 99.81 |
| chr3 | 18009726 | 18010852 | 1127  | 0    | C_unshiu_00767 | 104722 | 103596 | 1127  | 0.84  | 100   |
| chr3 | 18021757 | 18023901 | 2145  | 0.01 | C_unshiu_02591 | 19086  | 21221  | 2136  | 9.54  | 98.28 |
| chr3 | 18023902 | 18025431 | 1530  | 0.01 | C_unshiu_00821 | 86906  | 88435  | 1530  | 1.21  | 100   |
| chr3 | 18028527 | 18030546 | 2020  | 0.01 | C_unshiu_00767 | 89674  | 87656  | 2019  | 1.51  | 99.95 |
| chr3 | 18030833 | 18033220 | 2388  | 0.01 | C_unshiu_00767 | 87180  | 84793  | 2388  | 1.79  | 99.96 |
| chr3 | 18038618 | 18044854 | 6237  | 0.02 | C_unshiu_02591 | 13822  | 7576   | 6247  | 27.89 | 98.74 |
| chr3 | 18056218 | 18057617 | 1400  | 0.01 | C_unshiu_00767 | 73436  | 72037  | 1400  | 1.05  | 100   |
| chr3 | 18059118 | 18066366 | 7249  | 0.03 | C_unshiu_00767 | 70134  | 62901  | 7234  | 5.42  | 99.26 |
| chr3 | 18062383 | 18067328 | 4946  | 0.02 | C_unshiu_00149 | 383617 | 378646 | 4972  | 1.29  | 98.33 |
| chr3 | 18088386 | 18136677 | 48292 | 0.17 | C_unshiu_01805 | 48325  | 1      | 48325 | 100   | 99.29 |
| chr3 | 18133721 | 18140894 | 7174  | 0.03 | C_unshiu_00149 | 331254 | 324045 | 7210  | 1.86  | 98.68 |
| chr3 | 18141310 | 18146224 | 4915  | 0.02 | C_unshiu_00149 | 322890 | 317930 | 4961  | 1.28  | 98.59 |
| chr3 | 18169379 | 18173674 | 4296  | 0.02 | C_unshiu_00149 | 296198 | 291900 | 4299  | 1.11  | 99.84 |
| chr3 | 18179608 | 18189443 | 9836  | 0.04 | C_unshiu_00149 | 284659 | 274795 | 9865  | 2.55  | 98.51 |
| chr3 | 18215788 | 18220336 | 4549  | 0.02 | C_unshiu_00149 | 254111 | 249552 | 4560  | 1.18  | 98.1  |
| chr3 | 18226155 | 18230839 | 4685  | 0.02 | C_unshiu_00149 | 247921 | 243242 | 4680  | 1.21  | 99.04 |
| chr3 | 18261136 | 18266517 | 5382  | 0.02 | C_unshiu_00149 | 211069 | 205643 | 5427  | 1.4   | 98.23 |
| chr3 | 18266502 | 18267621 | 1120  | 0    | C_unshiu_00149 | 205420 | 204303 | 1118  | 0.29  | 98.93 |
| chr3 | 18303613 | 18309650 | 6038  | 0.02 | C_unshiu_02014 | 1      | 6041   | 6041  | 15.05 | 98.28 |
| chr3 | 18311174 | 18313389 | 2216  | 0.01 | C_unshiu_00855 | 59039  | 61254  | 2216  | 1.81  | 99.77 |
| chr3 | 18315107 | 18356691 | 41585 | 0.15 | C_unshiu_00855 | 63716  | 105292 | 41577 | 34    | 99.45 |
| chr3 | 18360435 | 18363516 | 3082  | 0.01 | C_unshiu_00855 | 107780 | 110851 | 3072  | 2.51  | 98.9  |
| chr3 | 18365846 | 18370504 | 4659  | 0.02 | C_unshiu_00855 | 112567 | 117244 | 4678  | 3.83  | 98.63 |
| chr3 | 18368361 | 18370504 | 2144  | 0.01 | C_unshiu_00711 | 41139  | 38993  | 2147  | 1.51  | 99.07 |

|      |          |          |       |      |                |        |        |       |       |       |
|------|----------|----------|-------|------|----------------|--------|--------|-------|-------|-------|
| chr3 | 18391574 | 18400343 | 8770  | 0.03 | C_unshiu_02020 | 2068   | 10851  | 8784  | 21.98 | 99.48 |
| chr3 | 18400349 | 18413974 | 13626 | 0.05 | C_unshiu_02020 | 12156  | 25798  | 13643 | 34.15 | 99.06 |
| chr3 | 18430077 | 18438474 | 8398  | 0.03 | C_unshiu_01468 | 21435  | 29840  | 8406  | 12.83 | 99.1  |
| chr3 | 18439983 | 18441442 | 1460  | 0.01 | C_unshiu_02714 | 10211  | 8747   | 1465  | 7.46  | 99.11 |
| chr3 | 18442666 | 18448242 | 5577  | 0.02 | C_unshiu_01468 | 34123  | 39673  | 5551  | 8.47  | 99.44 |
| chr3 | 18449838 | 18453291 | 3454  | 0.01 | C_unshiu_02714 | 3442   | 1      | 3442  | 17.53 | 99.54 |
| chr3 | 18494742 | 18496050 | 1309  | 0    | C_unshiu_02166 | 29516  | 30824  | 1309  | 3.79  | 99.31 |
| chr3 | 18504160 | 18506503 | 2344  | 0.01 | C_unshiu_01165 | 79707  | 77371  | 2337  | 2.61  | 99.32 |
| chr3 | 18507469 | 18519353 | 11885 | 0.04 | C_unshiu_01165 | 75976  | 64031  | 11946 | 13.35 | 98.75 |
| chr3 | 18519397 | 18528313 | 8917  | 0.03 | C_unshiu_01165 | 64092  | 55179  | 8914  | 9.97  | 98.8  |
| chr3 | 18528652 | 18534472 | 5821  | 0.02 | C_unshiu_01165 | 54166  | 48342  | 5825  | 6.51  | 98.47 |
| chr3 | 18535098 | 18546020 | 10923 | 0.04 | C_unshiu_01165 | 47973  | 36967  | 11007 | 12.31 | 98.79 |
| chr3 | 18549385 | 18554578 | 5194  | 0.02 | C_unshiu_01165 | 36386  | 31164  | 5223  | 5.84  | 98.99 |
| chr3 | 18591988 | 18597317 | 5330  | 0.02 | C_unshiu_00225 | 31659  | 36992  | 5334  | 1.71  | 99.72 |
| chr3 | 18597583 | 18680425 | 82843 | 0.3  | C_unshiu_00225 | 37030  | 119906 | 82877 | 26.51 | 99.91 |
| chr3 | 18681235 | 18683300 | 2066  | 0.01 | C_unshiu_00846 | 35429  | 33348  | 2082  | 1.69  | 98.75 |
| chr3 | 18692411 | 18694771 | 2361  | 0.01 | C_unshiu_00580 | 11770  | 14135  | 2366  | 1.38  | 99.58 |
| chr3 | 18696844 | 18698455 | 1612  | 0.01 | C_unshiu_00580 | 16385  | 18001  | 1617  | 0.94  | 98.76 |
| chr3 | 18717446 | 18722401 | 4956  | 0.02 | C_unshiu_00580 | 23788  | 28745  | 4958  | 2.89  | 99.6  |
| chr3 | 18727042 | 18729325 | 2284  | 0.01 | C_unshiu_00580 | 32804  | 35091  | 2288  | 1.33  | 98.91 |
| chr3 | 18729662 | 18739462 | 9801  | 0.04 | C_unshiu_00580 | 36218  | 46057  | 9840  | 5.73  | 98.42 |
| chr3 | 18751102 | 18773356 | 22255 | 0.08 | C_unshiu_00580 | 52392  | 74772  | 22381 | 13.04 | 98.21 |
| chr3 | 18787671 | 18790699 | 3029  | 0.01 | C_unshiu_00580 | 92162  | 95191  | 3030  | 1.77  | 99.37 |
| chr3 | 18797167 | 18808351 | 11185 | 0.04 | C_unshiu_00580 | 99259  | 110435 | 11177 | 6.51  | 98.53 |
| chr3 | 18817691 | 18836525 | 18835 | 0.07 | C_unshiu_00580 | 119775 | 138590 | 18816 | 10.96 | 98.74 |
| chr3 | 18836519 | 18842441 | 5923  | 0.02 | C_unshiu_00580 | 138959 | 144895 | 5937  | 3.46  | 98.99 |
| chr3 | 18866948 | 18868746 | 1799  | 0.01 | C_unshiu_01748 | 49381  | 47590  | 1792  | 3.54  | 99.5  |
| chr3 | 18870715 | 18872550 | 1836  | 0.01 | C_unshiu_00580 | 166280 | 168103 | 1824  | 1.06  | 98.48 |
| chr3 | 18875338 | 18884056 | 8719  | 0.03 | C_unshiu_01748 | 46683  | 37908  | 8776  | 17.34 | 98.28 |
| chr3 | 18911943 | 18914691 | 2749  | 0.01 | C_unshiu_01748 | 12351  | 9603   | 2749  | 5.43  | 98.76 |
| chr3 | 18914767 | 18923558 | 8792  | 0.03 | C_unshiu_01748 | 9484   | 674    | 8811  | 17.41 | 98.5  |
| chr3 | 18921383 | 18932952 | 11570 | 0.04 | C_unshiu_00843 | 18389  | 29948  | 11560 | 9.38  | 99.1  |
| chr3 | 18937256 | 18941918 | 4663  | 0.02 | C_unshiu_00843 | 31649  | 36310  | 4662  | 3.78  | 99.38 |
| chr3 | 18942618 | 18944264 | 1647  | 0.01 | C_unshiu_00843 | 37503  | 39150  | 1648  | 1.34  | 99.39 |
| chr3 | 18945256 | 18954912 | 9657  | 0.03 | C_unshiu_00843 | 40049  | 49689  | 9641  | 7.82  | 98.4  |
| chr3 | 18956294 | 18964862 | 8569  | 0.03 | C_unshiu_00843 | 51527  | 60060  | 8534  | 6.93  | 98.16 |
| chr3 | 18970854 | 18973131 | 2278  | 0.01 | C_unshiu_00843 | 69133  | 71422  | 2290  | 1.86  | 98.65 |
| chr3 | 18976485 | 18981675 | 5191  | 0.02 | C_unshiu_00843 | 63641  | 68831  | 5191  | 4.21  | 99.83 |
| chr3 | 18987201 | 18989671 | 2471  | 0.01 | C_unshiu_00843 | 78206  | 80676  | 2471  | 2.01  | 99.15 |
| chr3 | 19005747 | 19010206 | 4460  | 0.02 | C_unshiu_00843 | 94924  | 99426  | 4503  | 3.65  | 98    |
| chr3 | 19013855 | 19028592 | 14738 | 0.05 | C_unshiu_00843 | 101808 | 116567 | 14760 | 11.98 | 98.7  |
| chr3 | 19026119 | 19040362 | 14244 | 0.05 | C_unshiu_00695 | 124045 | 109785 | 14261 | 9.88  | 98.27 |
| chr3 | 19041104 | 19046091 | 4988  | 0.02 | C_unshiu_02273 | 2410   | 7398   | 4989  | 16.28 | 98.26 |
| chr3 | 19047173 | 19049258 | 2086  | 0.01 | C_unshiu_02273 | 9110   | 11195  | 2086  | 6.81  | 100   |
| chr3 | 19049983 | 19051477 | 1495  | 0.01 | C_unshiu_02273 | 13797  | 15291  | 1495  | 4.88  | 99.67 |
| chr3 | 19060574 | 19075605 | 15032 | 0.05 | C_unshiu_00154 | 112498 | 97449  | 15050 | 3.95  | 98.89 |
| chr3 | 19084135 | 19090030 | 5896  | 0.02 | C_unshiu_00154 | 89689  | 83777  | 5913  | 1.55  | 98.97 |
| chr3 | 19136147 | 19140897 | 4751  | 0.02 | C_unshiu_00154 | 40849  | 36097  | 4753  | 1.25  | 99.73 |
| chr3 | 19141071 | 19146963 | 5893  | 0.02 | C_unshiu_00154 | 35536  | 29638  | 5899  | 1.55  | 99.59 |
| chr3 | 19148808 | 19157761 | 8954  | 0.03 | C_unshiu_00154 | 29007  | 20030  | 8978  | 2.35  | 98.02 |
| chr3 | 19203771 | 19206795 | 3025  | 0.01 | C_unshiu_01968 | 19331  | 22358  | 3028  | 7.24  | 98.02 |
| chr3 | 19210894 | 19212794 | 1901  | 0.01 | C_unshiu_00869 | 79982  | 81883  | 1902  | 1.58  | 99.95 |
| chr3 | 19229805 | 19233619 | 3815  | 0.01 | C_unshiu_00580 | 1      | 3818   | 3818  | 2.22  | 99.16 |
| chr3 | 19244229 | 19250972 | 6744  | 0.02 | C_unshiu_01331 | 67605  | 74377  | 6773  | 9.01  | 98.02 |
| chr3 | 19256428 | 19274002 | 17575 | 0.06 | C_unshiu_00705 | 140803 | 123294 | 17510 | 12.23 | 98.37 |
| chr3 | 19276263 | 19279298 | 3036  | 0.01 | C_unshiu_00705 | 122865 | 119832 | 3034  | 2.12  | 98.19 |
| chr3 | 19279768 | 19282705 | 2938  | 0.01 | C_unshiu_00705 | 119033 | 116096 | 2938  | 2.05  | 99.42 |
| chr3 | 19288785 | 19290398 | 1614  | 0.01 | C_unshiu_02312 | 3098   | 1483   | 1616  | 5.46  | 99.57 |
| chr3 | 19290510 | 19297331 | 6822  | 0.02 | C_unshiu_00705 | 107597 | 100725 | 6873  | 4.8   | 98.2  |
| chr3 | 19297829 | 19305792 | 7964  | 0.03 | C_unshiu_00705 | 100691 | 92668  | 8024  | 5.61  | 98.14 |
| chr3 | 19305793 | 19307723 | 1931  | 0.01 | C_unshiu_01573 | 24348  | 22418  | 1931  | 3.27  | 100   |
| chr3 | 19307717 | 19309309 | 1593  | 0.01 | C_unshiu_02306 | 28508  | 26916  | 1593  | 5.37  | 99.56 |
| chr3 | 19315118 | 19365362 | 50245 | 0.18 | C_unshiu_00705 | 82078  | 31742  | 50337 | 35.16 | 98.67 |
| chr3 | 19372370 | 19374366 | 1997  | 0.01 | C_unshiu_00705 | 25424  | 23431  | 1994  | 1.39  | 98.85 |
| chr3 | 19374358 | 19388599 | 14242 | 0.05 | C_unshiu_00705 | 22595  | 8374   | 14222 | 9.93  | 99.47 |
| chr3 | 19388673 | 19396960 | 8288  | 0.03 | C_unshiu_00705 | 8286   | 1      | 8286  | 5.79  | 99.93 |
| chr3 | 19404903 | 19426097 | 21195 | 0.08 | C_unshiu_00829 | 31150  | 52291  | 21142 | 16.93 | 99.58 |
| chr3 | 19426113 | 19427533 | 1421  | 0.01 | C_unshiu_00829 | 54218  | 55639  | 1422  | 1.14  | 99.72 |
| chr3 | 19429243 | 19436382 | 7140  | 0.03 | C_unshiu_00829 | 57947  | 65086  | 7140  | 5.72  | 100   |
| chr3 | 19436430 | 19439864 | 3435  | 0.01 | C_unshiu_00829 | 65453  | 68887  | 3435  | 2.75  | 99.97 |
| chr3 | 19441254 | 19442398 | 1145  | 0    | C_unshiu_00829 | 94766  | 93621  | 1146  | 0.92  | 98.27 |
| chr3 | 19446872 | 19451432 | 4561  | 0.02 | C_unshiu_00829 | 90569  | 86008  | 4562  | 3.65  | 99.98 |
| chr3 | 19452005 | 19454575 | 2571  | 0.01 | C_unshiu_01784 | 121    | 2691   | 2571  | 5.23  | 100   |
| chr3 | 19463747 | 19476665 | 12919 | 0.05 | C_unshiu_01087 | 3376   | 16303  | 12928 | 13.27 | 99.51 |
| chr3 | 19476714 | 19499794 | 23081 | 0.08 | C_unshiu_01784 | 13707  | 36993  | 23287 | 47.41 | 98.06 |
| chr3 | 19499819 | 19501352 | 1534  | 0.01 | C_unshiu_00116 | 187651 | 189182 | 1532  | 0.35  | 99.15 |
| chr3 | 19501362 | 19502893 | 1532  | 0.01 | C_unshiu_01784 | 39398  | 40929  | 1532  | 3.12  | 99.8  |
| chr3 | 19505887 | 19508206 | 2320  | 0.01 | C_unshiu_01784 | 46794  | 49120  | 2327  | 4.74  | 99.14 |
| chr3 | 19507616 | 19515414 | 7799  | 0.03 | C_unshiu_00512 | 179962 | 172177 | 7786  | 4.15  | 98.19 |

|      |          |          |       |      |                |        |        |       |       |       |
|------|----------|----------|-------|------|----------------|--------|--------|-------|-------|-------|
| chr3 | 19521993 | 19532233 | 10241 | 0.04 | C_unshiu_00512 | 165470 | 155231 | 10240 | 5.46  | 99.85 |
| chr3 | 19532231 | 19535884 | 3654  | 0.01 | C_unshiu_00512 | 154600 | 150923 | 3678  | 1.96  | 98.23 |
| chr3 | 19542480 | 19548636 | 6157  | 0.02 | C_unshiu_00730 | 9859   | 16033  | 6175  | 4.45  | 98.76 |
| chr3 | 19550220 | 19564214 | 13995 | 0.05 | C_unshiu_00730 | 18676  | 32717  | 14042 | 10.13 | 98.98 |
| chr3 | 19572318 | 19588369 | 16052 | 0.06 | C_unshiu_00730 | 40790  | 56835  | 16046 | 11.57 | 98.71 |
| chr3 | 19590260 | 19591338 | 1079  | 0    | C_unshiu_00836 | 123569 | 122490 | 1080  | 0.87  | 99.44 |
| chr3 | 19591586 | 19592734 | 1149  | 0    | C_unshiu_00836 | 122812 | 121666 | 1147  | 0.92  | 99.83 |
| chr3 | 19594110 | 19601166 | 7057  | 0.03 | C_unshiu_00836 | 120622 | 113554 | 7069  | 5.69  | 99.12 |
| chr3 | 19602983 | 19607089 | 4107  | 0.01 | C_unshiu_00836 | 111649 | 107525 | 4125  | 3.32  | 98.31 |
| chr3 | 19622627 | 19663346 | 15720 | 0.06 | C_unshiu_00154 | 115807 | 131475 | 15669 | 4.11  | 98.74 |
| chr3 | 19639239 | 19642311 | 3073  | 0.01 | C_unshiu_00154 | 131294 | 134366 | 3073  | 0.81  | 100   |
| chr3 | 19642491 | 19645824 | 3334  | 0.01 | C_unshiu_00154 | 134928 | 138252 | 3325  | 0.87  | 98.92 |
| chr3 | 19648463 | 19651171 | 2709  | 0.01 | C_unshiu_02955 | 10850  | 13547  | 2698  | 18.93 | 98.89 |
| chr3 | 19660127 | 19663596 | 3470  | 0.01 | C_unshiu_00154 | 152658 | 156128 | 3471  | 0.91  | 99.02 |
| chr3 | 19665811 | 19681148 | 15338 | 0.06 | C_unshiu_00154 | 156908 | 172309 | 15402 | 4.04  | 98.39 |
| chr3 | 19684727 | 19691841 | 7115  | 0.03 | C_unshiu_00154 | 176552 | 183633 | 7082  | 1.86  | 98.22 |
| chr3 | 19691905 | 19716994 | 25090 | 0.09 | C_unshiu_00154 | 183896 | 208973 | 25078 | 6.58  | 98.89 |
| chr3 | 19724203 | 19731117 | 6915  | 0.02 | C_unshiu_00154 | 216662 | 223579 | 6918  | 1.81  | 99.21 |
| chr3 | 19733026 | 19735060 | 2035  | 0.01 | C_unshiu_00154 | 226094 | 228132 | 2039  | 0.53  | 99.41 |
| chr3 | 19737120 | 19761793 | 24674 | 0.09 | C_unshiu_00154 | 230728 | 255475 | 24748 | 6.49  | 98.54 |
| chr3 | 19761810 | 19763467 | 1658  | 0.01 | C_unshiu_00154 | 255734 | 257391 | 1658  | 0.43  | 100   |
| chr3 | 19765782 | 19782967 | 17186 | 0.06 | C_unshiu_00154 | 259122 | 276323 | 17202 | 4.51  | 98.42 |
| chr3 | 19796115 | 19798505 | 2391  | 0.01 | C_unshiu_01729 | 35819  | 33441  | 2379  | 4.62  | 98.62 |
| chr3 | 19799576 | 19831885 | 32310 | 0.12 | C_unshiu_01729 | 33107  | 841    | 32267 | 62.61 | 99.01 |
| chr3 | 19904125 | 19906946 | 2822  | 0.01 | C_unshiu_02011 | 19490  | 22321  | 2832  | 7.03  | 99.15 |
| chr3 | 19908769 | 19914616 | 5848  | 0.02 | C_unshiu_00331 | 186519 | 180670 | 5850  | 2.32  | 98.45 |
| chr3 | 19914641 | 19919969 | 5329  | 0.02 | C_unshiu_00331 | 180205 | 174876 | 5330  | 2.11  | 99.94 |
| chr3 | 19920070 | 19922270 | 2201  | 0.01 | C_unshiu_01868 | 2206   | 1      | 2206  | 4.81  | 99.59 |
| chr3 | 19926230 | 19952593 | 26364 | 0.1  | C_unshiu_01080 | 17204  | 43607  | 26404 | 26.97 | 98.73 |
| chr3 | 19953012 | 19956183 | 3172  | 0.01 | C_unshiu_01080 | 43601  | 46777  | 3177  | 3.24  | 99.34 |
| chr3 | 19956102 | 19959446 | 3345  | 0.01 | C_unshiu_01080 | 46735  | 50087  | 3353  | 3.42  | 98.45 |
| chr3 | 19961317 | 19983167 | 21851 | 0.08 | C_unshiu_01080 | 52148  | 74065  | 21918 | 22.38 | 99.08 |
| chr3 | 19986795 | 19990995 | 4201  | 0.02 | C_unshiu_00744 | 135782 | 131582 | 4201  | 3.06  | 99.07 |
| chr3 | 19992210 | 19993260 | 1051  | 0    | C_unshiu_00744 | 131482 | 130428 | 1055  | 0.77  | 98.2  |
| chr3 | 20010785 | 20014476 | 3692  | 0.01 | C_unshiu_00744 | 112411 | 108726 | 3686  | 2.69  | 98.62 |
| chr3 | 20028213 | 20043667 | 15455 | 0.06 | C_unshiu_01045 | 80279  | 95640  | 15362 | 15.18 | 98.49 |
| chr3 | 20058974 | 20060113 | 1140  | 0    | C_unshiu_02596 | 1      | 1140   | 1140  | 5.13  | 99.56 |
| chr3 | 20074471 | 20088680 | 14210 | 0.05 | C_unshiu_01567 | 9180   | 23343  | 14164 | 23.9  | 99.41 |
| chr3 | 20089990 | 20120402 | 30413 | 0.11 | C_unshiu_01567 | 24994  | 55403  | 30410 | 51.31 | 98.89 |
| chr3 | 20108579 | 20121039 | 12461 | 0.05 | C_unshiu_00115 | 7580   | 20100  | 12521 | 2.89  | 98.82 |
| chr3 | 20121121 | 20125658 | 4538  | 0.02 | C_unshiu_00115 | 20873  | 25427  | 4555  | 1.05  | 98.86 |
| chr3 | 20141674 | 20148707 | 7034  | 0.03 | C_unshiu_00115 | 42179  | 49208  | 7030  | 1.63  | 98.26 |
| chr3 | 20149505 | 20158039 | 8535  | 0.03 | C_unshiu_00115 | 50514  | 59059  | 8546  | 1.98  | 98.94 |
| chr3 | 20168965 | 20179340 | 10376 | 0.04 | C_unshiu_00115 | 67597  | 77988  | 10392 | 2.4   | 98.5  |
| chr3 | 20192279 | 20204942 | 12664 | 0.05 | C_unshiu_00115 | 85992  | 98686  | 12695 | 2.93  | 98.6  |
| chr3 | 20248216 | 20250197 | 1982  | 0.01 | C_unshiu_00115 | 137823 | 139805 | 1983  | 0.46  | 99.95 |
| chr3 | 20269267 | 20271954 | 2688  | 0.01 | C_unshiu_00769 | 14748  | 17436  | 2689  | 2.02  | 99.15 |
| chr3 | 20281655 | 20284073 | 2419  | 0.01 | C_unshiu_00769 | 23686  | 26092  | 2407  | 1.81  | 98.88 |
| chr3 | 20292836 | 20294045 | 1210  | 0    | C_unshiu_00580 | 36257  | 35043  | 1215  | 0.71  | 98.27 |
| chr3 | 20317083 | 20319542 | 2460  | 0.01 | C_unshiu_00372 | 212433 | 209974 | 2460  | 1.06  | 100   |
| chr3 | 20320576 | 20322959 | 2384  | 0.01 | C_unshiu_00635 | 8878   | 11261  | 2384  | 1.49  | 99.96 |
| chr3 | 20336449 | 20346950 | 10502 | 0.04 | C_unshiu_00372 | 199571 | 189073 | 10499 | 4.52  | 99.28 |
| chr3 | 20356029 | 20357358 | 1330  | 0    | C_unshiu_00372 | 181047 | 179723 | 1325  | 0.57  | 98.73 |
| chr3 | 20382833 | 20385077 | 2245  | 0.01 | C_unshiu_01988 | 25922  | 28166  | 2245  | 5.48  | 99.29 |
| chr3 | 20398879 | 20401076 | 2198  | 0.01 | C_unshiu_01988 | 38762  | 40959  | 2198  | 5.37  | 99.82 |
| chr3 | 20421912 | 20423570 | 1659  | 0.01 | C_unshiu_00068 | 44967  | 46633  | 1667  | 0.32  | 98.98 |
| chr3 | 20424322 | 20436758 | 12437 | 0.04 | C_unshiu_00068 | 47697  | 60108  | 12412 | 2.35  | 98.14 |
| chr3 | 20437683 | 20439320 | 1638  | 0.01 | C_unshiu_00068 | 61402  | 63039  | 1638  | 0.31  | 99.88 |
| chr3 | 20440260 | 20441954 | 1695  | 0.01 | C_unshiu_00068 | 60037  | 61731  | 1695  | 0.32  | 100   |
| chr3 | 20442752 | 20452263 | 9512  | 0.03 | C_unshiu_00331 | 171991 | 162500 | 9492  | 3.77  | 98.65 |
| chr3 | 20453488 | 20454970 | 1483  | 0.01 | C_unshiu_00331 | 162504 | 161018 | 1487  | 0.59  | 99.4  |
| chr3 | 20454972 | 20457598 | 2627  | 0.01 | C_unshiu_02011 | 25793  | 28434  | 2642  | 6.56  | 99.09 |
| chr3 | 20459278 | 20464199 | 4922  | 0.02 | C_unshiu_02011 | 35351  | 40279  | 4929  | 12.24 | 99.21 |
| chr3 | 20469259 | 20473988 | 4730  | 0.02 | C_unshiu_01755 | 50228  | 45497  | 4732  | 9.42  | 99.64 |
| chr3 | 20474111 | 20479356 | 5246  | 0.02 | C_unshiu_01755 | 45291  | 40026  | 5266  | 10.48 | 98.77 |
| chr3 | 20478547 | 20487180 | 8634  | 0.03 | C_unshiu_00331 | 136745 | 128118 | 8628  | 3.42  | 99.13 |
| chr3 | 20493798 | 20498637 | 4840  | 0.02 | C_unshiu_01755 | 23289  | 18440  | 4850  | 9.66  | 99.07 |
| chr3 | 20509190 | 20513713 | 4524  | 0.02 | C_unshiu_00331 | 117894 | 113364 | 4531  | 1.8   | 99.36 |
| chr3 | 20515832 | 20539668 | 23837 | 0.09 | C_unshiu_00331 | 112571 | 88736  | 23836 | 9.46  | 99.33 |
| chr3 | 20539665 | 20565051 | 25387 | 0.09 | C_unshiu_00331 | 88444  | 63114  | 25331 | 10.05 | 98.82 |
| chr3 | 20561846 | 20567376 | 5531  | 0.02 | C_unshiu_02617 | 2069   | 7583   | 5515  | 25.42 | 98.99 |
| chr3 | 20567363 | 20573592 | 6230  | 0.02 | C_unshiu_00331 | 62060  | 55826  | 6235  | 2.47  | 99.6  |
| chr3 | 20575079 | 20576580 | 1502  | 0.01 | C_unshiu_00331 | 53826  | 52325  | 1502  | 0.6   | 100   |
| chr3 | 20582277 | 20583708 | 1432  | 0.01 | C_unshiu_02617 | 9041   | 10472  | 1432  | 6.6   | 99.93 |
| chr3 | 20588543 | 20591242 | 2700  | 0.01 | C_unshiu_02617 | 14971  | 17671  | 2701  | 12.45 | 98.89 |
| chr3 | 20591627 | 20594842 | 3216  | 0.01 | C_unshiu_00331 | 37811  | 34579  | 3233  | 1.28  | 99.1  |
| chr3 | 20609218 | 20615304 | 6087  | 0.02 | C_unshiu_00917 | 1      | 6086   | 6086  | 5.29  | 99.18 |
| chr3 | 20611887 | 20619765 | 7879  | 0.03 | C_unshiu_00331 | 23688  | 15818  | 7871  | 3.12  | 98.41 |
| chr3 | 20616409 | 20619765 | 3357  | 0.01 | C_unshiu_00917 | 6091   | 9462   | 3372  | 2.93  | 98.17 |

|      |          |          |       |      |                |        |        |       |       |       |
|------|----------|----------|-------|------|----------------|--------|--------|-------|-------|-------|
| chr3 | 20619766 | 20645140 | 25375 | 0.09 | C_unshiu_00917 | 9879   | 35306  | 25428 | 22.1  | 99.21 |
| chr3 | 20662209 | 20675028 | 12820 | 0.05 | C_unshiu_00917 | 51106  | 63905  | 12800 | 11.12 | 98.53 |
| chr3 | 20675047 | 20676606 | 1560  | 0.01 | C_unshiu_00714 | 61723  | 63283  | 1561  | 1.1   | 99.87 |
| chr3 | 20761362 | 20765463 | 4102  | 0.01 | C_unshiu_01545 | 35976  | 40076  | 4101  | 6.75  | 99.27 |
| chr3 | 20766946 | 20769137 | 2192  | 0.01 | C_unshiu_01545 | 41231  | 43422  | 2192  | 3.61  | 100   |
| chr3 | 20772074 | 20785598 | 13525 | 0.05 | C_unshiu_01545 | 47215  | 60772  | 13558 | 22.31 | 99.26 |
| chr3 | 20783996 | 20802570 | 18575 | 0.07 | C_unshiu_00030 | 697413 | 678781 | 18633 | 2.63  | 98.06 |
| chr3 | 20807727 | 20815868 | 8142  | 0.03 | C_unshiu_02716 | 7726   | 15856  | 8131  | 41.55 | 98.31 |
| chr3 | 20817837 | 20825551 | 7715  | 0.03 | C_unshiu_00030 | 671780 | 664038 | 7743  | 1.09  | 98.95 |
| chr3 | 20828868 | 20836963 | 8096  | 0.03 | C_unshiu_00030 | 659446 | 651329 | 8118  | 1.14  | 99.15 |
| chr3 | 20836954 | 20857478 | 20525 | 0.07 | C_unshiu_00030 | 650409 | 629821 | 20589 | 2.9   | 99.01 |
| chr3 | 20857928 | 20883961 | 26034 | 0.09 | C_unshiu_00030 | 629723 | 603603 | 26121 | 3.68  | 98.08 |
| chr3 | 20884475 | 20892124 | 7650  | 0.03 | C_unshiu_00030 | 603502 | 595858 | 7645  | 1.08  | 98.01 |
| chr3 | 20892124 | 20900022 | 7899  | 0.03 | C_unshiu_00030 | 595673 | 587804 | 7870  | 1.11  | 98.67 |
| chr3 | 20900044 | 20902110 | 2067  | 0.01 | C_unshiu_00030 | 587187 | 585121 | 2067  | 0.29  | 100   |
| chr3 | 20902358 | 20920695 | 18338 | 0.07 | C_unshiu_00030 | 584543 | 566202 | 18342 | 2.59  | 98.32 |
| chr3 | 20929583 | 20937479 | 7897  | 0.03 | C_unshiu_00030 | 556369 | 548454 | 7916  | 1.12  | 98.39 |
| chr3 | 20947502 | 20951239 | 3738  | 0.01 | C_unshiu_00030 | 539895 | 536149 | 3747  | 0.53  | 98.72 |
| chr3 | 20954629 | 20967154 | 12526 | 0.05 | C_unshiu_00744 | 95530  | 108055 | 12526 | 9.13  | 100   |
| chr3 | 20974715 | 20975964 | 1250  | 0    | C_unshiu_01143 | 24327  | 25576  | 1250  | 1.36  | 100   |
| chr3 | 20977090 | 20980103 | 3014  | 0.01 | C_unshiu_01872 | 11886  | 8870   | 3017  | 6.6   | 99.54 |
| chr3 | 20986652 | 20999956 | 13305 | 0.05 | C_unshiu_00412 | 2874   | 16226  | 13353 | 6.04  | 98.04 |
| chr3 | 21018421 | 21044692 | 26272 | 0.09 | C_unshiu_00412 | 34672  | 60976  | 26305 | 11.9  | 98.68 |
| chr3 | 21045743 | 21048293 | 2551  | 0.01 | C_unshiu_00412 | 70773  | 73338  | 2566  | 1.16  | 98.52 |
| chr3 | 21056830 | 21063123 | 6294  | 0.02 | C_unshiu_00412 | 82453  | 88745  | 6293  | 2.85  | 98.13 |
| chr3 | 21074298 | 21075395 | 1098  | 0    | C_unshiu_00099 | 53123  | 52027  | 1097  | 0.24  | 98.09 |
| chr3 | 21081098 | 21088918 | 7821  | 0.03 | C_unshiu_00412 | 101252 | 109056 | 7805  | 3.53  | 99.19 |
| chr3 | 21103243 | 21109085 | 5843  | 0.02 | C_unshiu_00412 | 123955 | 129786 | 5832  | 2.64  | 98.38 |
| chr3 | 21109528 | 21118556 | 9029  | 0.03 | C_unshiu_00412 | 129534 | 138584 | 9051  | 4.1   | 98.39 |
| chr3 | 21134216 | 21138837 | 4622  | 0.02 | C_unshiu_00412 | 154984 | 159627 | 4644  | 2.1   | 98.24 |
| chr3 | 21153419 | 21159482 | 6064  | 0.02 | C_unshiu_00412 | 174408 | 180474 | 6067  | 2.75  | 99.39 |
| chr3 | 21173979 | 21176353 | 2375  | 0.01 | C_unshiu_01991 | 32889  | 35264  | 2376  | 5.81  | 99.96 |
| chr3 | 21198680 | 21210751 | 12072 | 0.04 | C_unshiu_00412 | 208959 | 221008 | 12050 | 5.45  | 98.77 |
| chr3 | 21215076 | 21235719 | 20644 | 0.07 | C_unshiu_00443 | 111064 | 90416  | 20649 | 9.81  | 98.58 |
| chr3 | 21247363 | 21255557 | 8195  | 0.03 | C_unshiu_00443 | 76824  | 68678  | 8147  | 3.87  | 98.56 |
| chr3 | 21255574 | 21261721 | 6148  | 0.02 | C_unshiu_00443 | 68215  | 62071  | 6145  | 2.92  | 98.77 |
| chr3 | 21267040 | 21274158 | 7119  | 0.03 | C_unshiu_00443 | 52962  | 45851  | 7112  | 3.38  | 98.95 |
| chr3 | 21274158 | 21288079 | 13922 | 0.05 | C_unshiu_00443 | 45092  | 31138  | 13955 | 6.63  | 99.1  |
| chr3 | 21289088 | 21291494 | 2407  | 0.01 | C_unshiu_00443 | 29586  | 27175  | 2412  | 1.15  | 99.54 |
| chr3 | 21294902 | 21297334 | 2433  | 0.01 | C_unshiu_00443 | 25933  | 23495  | 2439  | 1.16  | 99.26 |
| chr3 | 21298779 | 21307848 | 9070  | 0.03 | C_unshiu_00443 | 22486  | 13410  | 9077  | 4.31  | 98.82 |
| chr3 | 21356893 | 21361030 | 4138  | 0.01 | C_unshiu_01248 | 52901  | 57062  | 4162  | 5.14  | 98.61 |
| chr3 | 21365886 | 21366976 | 1091  | 0    | C_unshiu_01248 | 63393  | 64481  | 1089  | 1.35  | 99.27 |
| chr3 | 21372998 | 21386897 | 13900 | 0.05 | C_unshiu_01248 | 64595  | 78465  | 13871 | 17.13 | 98.53 |
| chr3 | 21387406 | 21388559 | 1154  | 0    | C_unshiu_02491 | 6763   | 7916   | 1154  | 4.66  | 100   |
| chr3 | 21388581 | 21395708 | 7128  | 0.03 | C_unshiu_02491 | 8346   | 15496  | 7151  | 28.89 | 99.02 |
| chr3 | 21399783 | 21401299 | 1517  | 0.01 | C_unshiu_01027 | 102706 | 101190 | 1517  | 1.47  | 98.62 |
| chr3 | 21419699 | 21422491 | 2793  | 0.01 | C_unshiu_01027 | 81909  | 79120  | 2790  | 2.7   | 98.72 |
| chr3 | 21453025 | 21460375 | 7351  | 0.03 | C_unshiu_01027 | 49257  | 41897  | 7361  | 7.13  | 98.85 |
| chr3 | 21471767 | 21474114 | 2348  | 0.01 | C_unshiu_01103 | 8262   | 10610  | 2349  | 2.45  | 99.4  |
| chr3 | 21475045 | 21478255 | 3211  | 0.01 | C_unshiu_01027 | 22461  | 19250  | 3212  | 3.11  | 99.53 |
| chr3 | 21479152 | 21487091 | 7940  | 0.03 | C_unshiu_01103 | 15915  | 23830  | 7916  | 8.26  | 98.54 |
| chr3 | 21489145 | 21491116 | 1972  | 0.01 | C_unshiu_01103 | 26349  | 28326  | 1978  | 2.06  | 98.53 |
| chr3 | 21518695 | 21526651 | 7957  | 0.03 | C_unshiu_01103 | 42558  | 50528  | 7971  | 8.31  | 98.38 |
| chr3 | 21546386 | 21548735 | 2350  | 0.01 | C_unshiu_01103 | 70860  | 73208  | 2349  | 2.45  | 99.79 |
| chr3 | 21548675 | 21555388 | 6714  | 0.02 | C_unshiu_01103 | 73210  | 79948  | 6739  | 7.03  | 98.74 |
| chr3 | 21555813 | 21558126 | 2314  | 0.01 | C_unshiu_01103 | 80324  | 82630  | 2307  | 2.41  | 98.67 |
| chr3 | 21563495 | 21566121 | 2627  | 0.01 | C_unshiu_01103 | 85374  | 88000  | 2627  | 2.74  | 100   |
| chr3 | 21568172 | 21573842 | 5671  | 0.02 | C_unshiu_01103 | 90208  | 95877  | 5670  | 5.91  | 99.19 |
| chr3 | 21577791 | 21579072 | 1282  | 0    | C_unshiu_02663 | 20616  | 19335  | 1282  | 6.22  | 99.84 |
| chr3 | 21583216 | 21589072 | 5857  | 0.02 | C_unshiu_02663 | 12817  | 6967   | 5851  | 28.38 | 99.49 |
| chr3 | 21593848 | 21599405 | 5558  | 0.02 | C_unshiu_02663 | 5623   | 1      | 5623  | 27.27 | 98.68 |
| chr3 | 21596236 | 21616116 | 19881 | 0.07 | C_unshiu_00159 | 330032 | 349910 | 19879 | 5.32  | 98.47 |
| chr3 | 21629623 | 21633117 | 3495  | 0.01 | C_unshiu_00997 | 1      | 3495   | 3495  | 3.28  | 99.77 |
| chr3 | 21634629 | 21637495 | 2867  | 0.01 | C_unshiu_00159 | 366643 | 369505 | 2863  | 0.77  | 99.27 |
| chr3 | 21637648 | 21641728 | 4081  | 0.01 | C_unshiu_00159 | 369497 | 373574 | 4078  | 1.09  | 98.41 |
| chr3 | 21649169 | 21673274 | 24106 | 0.09 | C_unshiu_00997 | 19814  | 44086  | 24273 | 22.79 | 98.04 |
| chr3 | 21689786 | 21692190 | 2405  | 0.01 | C_unshiu_00997 | 59019  | 61420  | 2402  | 2.26  | 98.88 |
| chr3 | 21692729 | 21695090 | 2362  | 0.01 | C_unshiu_00997 | 61854  | 64224  | 2371  | 2.23  | 99.07 |
| chr3 | 21718216 | 21719951 | 1736  | 0.01 | C_unshiu_00997 | 87411  | 89155  | 1745  | 1.64  | 98.68 |
| chr3 | 21770951 | 21781436 | 10486 | 0.04 | C_unshiu_00179 | 329407 | 318866 | 10542 | 2.93  | 98.06 |
| chr3 | 21787141 | 21793174 | 6034  | 0.02 | C_unshiu_00179 | 312625 | 306575 | 6051  | 1.68  | 99.31 |
| chr3 | 21809706 | 21810931 | 1226  | 0    | C_unshiu_00179 | 281147 | 279931 | 1217  | 0.34  | 98.29 |
| chr3 | 21819301 | 21821317 | 2017  | 0.01 | C_unshiu_00179 | 272531 | 270515 | 2017  | 0.56  | 100   |
| chr3 | 21850313 | 21852134 | 1822  | 0.01 | C_unshiu_00179 | 241008 | 239170 | 1839  | 0.51  | 98.32 |
| chr3 | 21863782 | 21866183 | 2402  | 0.01 | C_unshiu_00179 | 232756 | 230348 | 2409  | 0.67  | 99.09 |
| chr3 | 21870910 | 21874536 | 3627  | 0.01 | C_unshiu_00179 | 226594 | 222978 | 3617  | 1.01  | 99.45 |
| chr3 | 21888463 | 21896120 | 7658  | 0.03 | C_unshiu_00179 | 205892 | 198213 | 7680  | 2.14  | 99.32 |
| chr3 | 21915481 | 21920486 | 5006  | 0.02 | C_unshiu_00179 | 179636 | 174623 | 5014  | 1.4   | 98.29 |

|      |          |          |       |      |                |        |        |       |       |       |
|------|----------|----------|-------|------|----------------|--------|--------|-------|-------|-------|
| chr3 | 21960807 | 21966798 | 5992  | 0.02 | C_unshiu_00179 | 130844 | 124819 | 6026  | 1.68  | 98.41 |
| chr3 | 21967200 | 21972585 | 5386  | 0.02 | C_unshiu_00179 | 123912 | 118518 | 5395  | 1.5   | 99.11 |
| chr3 | 21981618 | 22016808 | 35191 | 0.13 | C_unshiu_00179 | 117622 | 82389  | 35234 | 9.81  | 98.15 |
| chr3 | 22014279 | 22021641 | 7363  | 0.03 | C_unshiu_00179 | 59590  | 66960  | 7371  | 2.05  | 99.21 |
| chr3 | 22027487 | 22029862 | 2376  | 0.01 | C_unshiu_00179 | 71562  | 73913  | 2352  | 0.65  | 98.49 |
| chr3 | 22027800 | 22036151 | 8352  | 0.03 | C_unshiu_02284 | 11128  | 19509  | 8382  | 27.7  | 98.52 |
| chr3 | 22045744 | 22047099 | 1356  | 0    | C_unshiu_02284 | 28912  | 30262  | 1351  | 4.46  | 99.63 |
| chr3 | 22065642 | 22068000 | 2359  | 0.01 | C_unshiu_00900 | 105640 | 103295 | 2346  | 2.01  | 98.64 |
| chr3 | 22073465 | 22075157 | 1693  | 0.01 | C_unshiu_01746 | 1693   | 1      | 1693  | 3.34  | 99.65 |
| chr3 | 22074363 | 22090865 | 16503 | 0.06 | C_unshiu_00900 | 96945  | 80456  | 16490 | 14.1  | 98.31 |
| chr3 | 22095727 | 22106433 | 10707 | 0.04 | C_unshiu_02200 | 33214  | 22548  | 10667 | 32.11 | 98.42 |
| chr3 | 22103543 | 22119700 | 16158 | 0.06 | C_unshiu_00900 | 66338  | 50155  | 16184 | 13.83 | 98.2  |
| chr3 | 22112480 | 22124778 | 12299 | 0.04 | C_unshiu_02200 | 21386  | 9040   | 12347 | 37.17 | 98.73 |
| chr3 | 22124117 | 22133753 | 9637  | 0.03 | C_unshiu_00900 | 46469  | 36855  | 9615  | 8.22  | 99.13 |
| chr3 | 22133745 | 22154741 | 20997 | 0.08 | C_unshiu_00900 | 36662  | 15571  | 21092 | 18.03 | 98.96 |
| chr3 | 22154741 | 22170251 | 15511 | 0.06 | C_unshiu_00900 | 15459  | 1      | 15459 | 13.21 | 98.78 |
| chr3 | 22166085 | 22182504 | 16420 | 0.06 | C_unshiu_02184 | 29856  | 13512  | 16345 | 48.29 | 98.47 |
| chr3 | 22186758 | 22188685 | 1928  | 0.01 | C_unshiu_02184 | 10275  | 8347   | 1929  | 5.7   | 99.33 |
| chr3 | 22192070 | 22195071 | 3002  | 0.01 | C_unshiu_02184 | 6009   | 3006   | 3004  | 8.87  | 99.37 |
| chr3 | 22195065 | 22198507 | 3443  | 0.01 | C_unshiu_01764 | 18886  | 22328  | 3443  | 6.9   | 100   |
| chr3 | 22210183 | 22215203 | 5021  | 0.02 | C_unshiu_00857 | 53757  | 58802  | 5046  | 4.13  | 98.77 |
| chr3 | 22216762 | 22234959 | 18198 | 0.07 | C_unshiu_00857 | 59126  | 77328  | 18203 | 14.9  | 99.07 |
| chr3 | 22235766 | 22243657 | 7892  | 0.03 | C_unshiu_00857 | 77313  | 85257  | 7945  | 6.51  | 98.06 |
| chr3 | 22246176 | 22263218 | 17043 | 0.06 | C_unshiu_00857 | 86665  | 103744 | 17080 | 13.98 | 98.77 |
| chr3 | 22264046 | 22269457 | 5412  | 0.02 | C_unshiu_00857 | 103231 | 108675 | 5445  | 4.46  | 98.92 |
| chr3 | 22271195 | 22275947 | 4753  | 0.02 | C_unshiu_00857 | 108945 | 113664 | 4720  | 3.86  | 98.76 |
| chr3 | 22276068 | 22284173 | 8106  | 0.03 | C_unshiu_00442 | 202103 | 193967 | 8137  | 3.86  | 98.93 |
| chr3 | 22285335 | 22296357 | 11023 | 0.04 | C_unshiu_00442 | 193369 | 182329 | 11041 | 5.24  | 98.15 |
| chr3 | 22313606 | 22320319 | 6714  | 0.02 | C_unshiu_00442 | 169206 | 162487 | 6720  | 3.19  | 99.24 |
| chr3 | 22368445 | 22371141 | 2697  | 0.01 | C_unshiu_00442 | 103827 | 101128 | 2700  | 1.28  | 98.85 |
| chr3 | 22372559 | 22377864 | 5306  | 0.02 | C_unshiu_00442 | 99601  | 94276  | 5326  | 2.53  | 99.01 |
| chr3 | 22389836 | 22412313 | 22478 | 0.08 | C_unshiu_00442 | 81786  | 59265  | 22522 | 10.7  | 98.89 |
| chr3 | 22419278 | 22421001 | 1724  | 0.01 | C_unshiu_00795 | 22604  | 24315  | 1712  | 1.33  | 98.61 |
| chr3 | 22449702 | 22453180 | 3479  | 0.01 | C_unshiu_00795 | 53653  | 57139  | 3487  | 2.71  | 99.05 |
| chr3 | 22464581 | 22482509 | 17929 | 0.06 | C_unshiu_00795 | 57697  | 75601  | 17905 | 13.91 | 99.3  |
| chr3 | 22482519 | 22489160 | 6642  | 0.02 | C_unshiu_01456 | 10424  | 17079  | 6656  | 10.08 | 98.47 |
| chr3 | 22489835 | 22492602 | 2768  | 0.01 | C_unshiu_01456 | 16233  | 19000  | 2768  | 4.19  | 99.49 |
| chr3 | 22495774 | 22501548 | 5775  | 0.02 | C_unshiu_01456 | 21529  | 27342  | 5814  | 8.8   | 98.03 |
| chr3 | 22512741 | 22513899 | 1159  | 0    | C_unshiu_01926 | 14970  | 13812  | 1159  | 2.64  | 100   |
| chr3 | 22541256 | 22543968 | 2713  | 0.01 | C_unshiu_00795 | 90620  | 93331  | 2712  | 2.11  | 98.86 |
| chr3 | 22544039 | 22546167 | 2129  | 0.01 | C_unshiu_00795 | 95566  | 93437  | 2130  | 1.65  | 98.04 |
| chr3 | 22546168 | 22547232 | 1065  | 0    | C_unshiu_00795 | 95569  | 96633  | 1065  | 0.83  | 100   |
| chr3 | 22547231 | 22548508 | 1278  | 0    | C_unshiu_00795 | 97162  | 98439  | 1278  | 0.99  | 100   |
| chr3 | 22556209 | 22557707 | 1499  | 0.01 | C_unshiu_01638 | 16293  | 14792  | 1502  | 2.7   | 99.8  |
| chr3 | 22557836 | 22561822 | 3987  | 0.01 | C_unshiu_02611 | 6690   | 2702   | 3989  | 18.29 | 98.75 |
| chr3 | 22564245 | 22565490 | 1246  | 0    | C_unshiu_01638 | 10128  | 8883   | 1246  | 2.24  | 100   |
| chr3 | 22566920 | 22573435 | 6516  | 0.02 | C_unshiu_01638 | 7038   | 523    | 6516  | 11.72 | 99.98 |
| chr3 | 22576361 | 22651052 | 74692 | 0.27 | C_unshiu_00558 | 126234 | 51550  | 74685 | 42.42 | 99.77 |
| chr3 | 22671553 | 22674984 | 3432  | 0.01 | C_unshiu_00336 | 8508   | 5067   | 3442  | 1.38  | 98.75 |
| chr3 | 22673288 | 22726706 | 53419 | 0.19 | C_unshiu_00469 | 13478  | 66834  | 53357 | 26.52 | 99.41 |
| chr3 | 22728720 | 22745959 | 17240 | 0.06 | C_unshiu_00469 | 67062  | 84301  | 17240 | 8.57  | 100   |
| chr3 | 22745901 | 22817118 | 71218 | 0.26 | C_unshiu_00469 | 84300  | 155520 | 71221 | 35.4  | 99.99 |
| chr3 | 22817117 | 22862841 | 45725 | 0.17 | C_unshiu_00469 | 155452 | 201191 | 45740 | 22.73 | 99.66 |
| chr3 | 22848658 | 22924292 | 75635 | 0.27 | C_unshiu_00598 | 140168 | 64493  | 75676 | 45    | 99.93 |
| chr3 | 22936342 | 22947296 | 10955 | 0.04 | C_unshiu_02771 | 11909  | 955    | 10955 | 59.07 | 100   |
| chr3 | 22957015 | 22982872 | 25858 | 0.09 | C_unshiu_01470 | 243    | 26064  | 25822 | 39.51 | 99.57 |
| chr3 | 22983000 | 22990972 | 7973  | 0.03 | C_unshiu_01470 | 26096  | 34068  | 7973  | 12.2  | 99.95 |
| chr3 | 22990993 | 22998069 | 7077  | 0.03 | C_unshiu_01470 | 33949  | 40994  | 7046  | 10.78 | 99.2  |
| chr3 | 22998576 | 23006179 | 7604  | 0.03 | C_unshiu_01470 | 41866  | 49469  | 7604  | 11.64 | 100   |
| chr3 | 23007131 | 23015573 | 8443  | 0.03 | C_unshiu_01470 | 51723  | 60165  | 8443  | 12.92 | 99.99 |
| chr3 | 23010578 | 23015573 | 4996  | 0.02 | C_unshiu_02288 | 30165  | 25158  | 5008  | 16.6  | 99.5  |
| chr3 | 23016591 | 23039734 | 23144 | 0.08 | C_unshiu_02288 | 23969  | 814    | 23156 | 76.76 | 99.86 |
| chr3 | 23052429 | 23131014 | 78586 | 0.28 | C_unshiu_00604 | 27475  | 105996 | 78522 | 47.24 | 99.9  |
| chr3 | 23132331 | 23141008 | 8678  | 0.03 | C_unshiu_00604 | 108148 | 116824 | 8677  | 5.22  | 99.99 |
| chr3 | 23145283 | 23152316 | 7034  | 0.03 | C_unshiu_00604 | 120365 | 127393 | 7029  | 4.23  | 99.93 |
| chr3 | 23155500 | 23158380 | 2881  | 0.01 | C_unshiu_00604 | 132205 | 135085 | 2881  | 1.73  | 100   |
| chr3 | 23158441 | 23168755 | 10315 | 0.04 | C_unshiu_00604 | 135324 | 145628 | 10305 | 6.2   | 99.74 |
| chr3 | 23171478 | 23176137 | 4660  | 0.02 | C_unshiu_00604 | 148731 | 153390 | 4660  | 2.8   | 98.67 |
| chr3 | 23180453 | 23195817 | 15365 | 0.06 | C_unshiu_00450 | 197322 | 181948 | 15375 | 7.41  | 99.49 |
| chr3 | 23198023 | 23213756 | 15734 | 0.06 | C_unshiu_00450 | 178950 | 163213 | 15738 | 7.59  | 99.94 |
| chr3 | 23218622 | 23220570 | 1949  | 0.01 | C_unshiu_00450 | 157951 | 156003 | 1949  | 0.94  | 99.38 |
| chr3 | 23222194 | 23313640 | 91447 | 0.33 | C_unshiu_00450 | 153986 | 62635  | 91352 | 44.05 | 99.83 |
| chr3 | 23293636 | 23376270 | 82635 | 0.3  | C_unshiu_00450 | 82633  | 1      | 82633 | 39.84 | 99.95 |
| chr3 | 23382522 | 23386756 | 4235  | 0.02 | C_unshiu_00269 | 107400 | 103166 | 4235  | 1.5   | 100   |
| chr3 | 23386747 | 23449017 | 62271 | 0.23 | C_unshiu_00756 | 133277 | 70999  | 62279 | 46.01 | 99.96 |
| chr3 | 23449902 | 23490135 | 40234 | 0.15 | C_unshiu_00756 | 69789  | 29542  | 40248 | 29.73 | 99.97 |
| chr3 | 23470160 | 23496542 | 26383 | 0.1  | C_unshiu_00756 | 49531  | 23160  | 26372 | 19.48 | 99.18 |
| chr3 | 23505520 | 23533974 | 28455 | 0.1  | C_unshiu_00164 | 9      | 28477  | 28469 | 7.7   | 99.33 |
| chr3 | 23534000 | 23600402 | 66403 | 0.24 | C_unshiu_00164 | 27884  | 94386  | 66503 | 17.98 | 99.34 |

|      |          |          |       |      |                |        |        |       |       |       |
|------|----------|----------|-------|------|----------------|--------|--------|-------|-------|-------|
| chr3 | 23600398 | 23614490 | 14093 | 0.05 | C_unshiu_00164 | 99421  | 113522 | 14102 | 3.81  | 98.27 |
| chr3 | 23614533 | 23615736 | 1204  | 0    | C_unshiu_00164 | 113710 | 114913 | 1204  | 0.33  | 99.25 |
| chr3 | 23615939 | 23621862 | 5924  | 0.02 | C_unshiu_00164 | 115258 | 121184 | 5927  | 1.6   | 99.33 |
| chr3 | 23621898 | 23628387 | 6490  | 0.02 | C_unshiu_00164 | 121182 | 127676 | 6495  | 1.76  | 99.55 |
| chr3 | 23628758 | 23684258 | 55501 | 0.2  | C_unshiu_00164 | 128082 | 183547 | 55466 | 14.99 | 99.16 |
| chr3 | 23684360 | 23708442 | 24083 | 0.09 | C_unshiu_00164 | 183550 | 207662 | 24113 | 6.52  | 99.78 |
| chr3 | 23712001 | 23716179 | 4179  | 0.02 | C_unshiu_01267 | 45937  | 41749  | 4189  | 5.26  | 99.64 |
| chr3 | 23716422 | 23758136 | 41715 | 0.15 | C_unshiu_01267 | 41686  | 1      | 41686 | 52.37 | 99.57 |
| chr3 | 23754658 | 23777790 | 23133 | 0.08 | C_unshiu_01106 | 95713  | 72610  | 23104 | 24.14 | 99.28 |
| chr3 | 23778588 | 23844023 | 65436 | 0.24 | C_unshiu_01106 | 70029  | 4631   | 65399 | 68.33 | 99.57 |
| chr3 | 23844086 | 23845386 | 1301  | 0    | C_unshiu_00383 | 199015 | 197715 | 1301  | 0.57  | 100   |
| chr3 | 23851052 | 23854327 | 3276  | 0.01 | C_unshiu_00386 | 1      | 3301   | 3301  | 1.46  | 98.73 |
| chr3 | 23854386 | 23857580 | 3195  | 0.01 | C_unshiu_00386 | 3392   | 6581   | 3190  | 1.41  | 99.75 |
| chr3 | 23858598 | 23860303 | 1706  | 0.01 | C_unshiu_00386 | 6966   | 8663   | 1698  | 0.75  | 98.89 |
| chr3 | 23860768 | 23881719 | 20952 | 0.08 | C_unshiu_00386 | 9591   | 30549  | 20959 | 9.25  | 99.8  |
| chr3 | 23881177 | 23889620 | 8444  | 0.03 | C_unshiu_00386 | 34727  | 43154  | 8428  | 3.72  | 99.47 |
| chr3 | 23889588 | 23908171 | 18584 | 0.07 | C_unshiu_00386 | 43046  | 61610  | 18565 | 8.19  | 99.6  |
| chr3 | 23908892 | 23910384 | 1493  | 0.01 | C_unshiu_00386 | 61490  | 62978  | 1489  | 0.66  | 99.53 |
| chr3 | 23911106 | 23912489 | 1384  | 0.01 | C_unshiu_00386 | 64163  | 65552  | 1390  | 0.61  | 99.42 |
| chr3 | 23915627 | 23921542 | 5916  | 0.02 | C_unshiu_00386 | 68636  | 74564  | 5929  | 2.62  | 98.67 |
| chr3 | 23921535 | 23991821 | 70287 | 0.25 | C_unshiu_00386 | 75552  | 145973 | 70422 | 31.07 | 99.46 |
| chr3 | 23996789 | 23998379 | 1591  | 0.01 | C_unshiu_00032 | 553547 | 555141 | 1595  | 0.23  | 99.56 |
| chr3 | 23998381 | 24029417 | 31037 | 0.11 | C_unshiu_00032 | 555299 | 586342 | 31044 | 4.42  | 99.84 |
| chr3 | 24029630 | 24032257 | 2628  | 0.01 | C_unshiu_00974 | 54868  | 57495  | 2628  | 2.41  | 99.89 |
| chr3 | 24043832 | 24068210 | 24379 | 0.09 | C_unshiu_00032 | 598510 | 622888 | 24379 | 3.47  | 99.77 |
| chr3 | 24068209 | 24091983 | 23775 | 0.09 | C_unshiu_00032 | 622962 | 646708 | 23747 | 3.38  | 99.64 |
| chr3 | 24091889 | 24120111 | 28223 | 0.1  | C_unshiu_00032 | 646662 | 674884 | 28223 | 4.02  | 99.53 |
| chr3 | 24120128 | 24126821 | 6694  | 0.02 | C_unshiu_00032 | 675864 | 682565 | 6702  | 0.95  | 99.45 |
| chr3 | 24127457 | 24132771 | 5315  | 0.02 | C_unshiu_00032 | 682557 | 687872 | 5316  | 0.76  | 99.92 |
| chr3 | 24133290 | 24144710 | 11421 | 0.04 | C_unshiu_00032 | 689115 | 700527 | 11413 | 1.62  | 99.44 |
| chr3 | 24144704 | 24145821 | 1118  | 0    | C_unshiu_00032 | 701761 | 702878 | 1118  | 0.16  | 100   |
| chr3 | 24156071 | 24158346 | 2276  | 0.01 | C_unshiu_00410 | 25740  | 28015  | 2276  | 1.03  | 99.87 |
| chr3 | 24158854 | 24161215 | 2362  | 0.01 | C_unshiu_00410 | 28919  | 31284  | 2366  | 1.07  | 99.7  |
| chr3 | 24165757 | 24173986 | 8230  | 0.03 | C_unshiu_00410 | 35275  | 43485  | 8211  | 3.71  | 99.62 |
| chr3 | 24174775 | 24179602 | 4828  | 0.02 | C_unshiu_00410 | 44786  | 49613  | 4828  | 2.18  | 99.98 |
| chr3 | 24182878 | 24205382 | 22505 | 0.08 | C_unshiu_00410 | 50810  | 73273  | 22464 | 10.16 | 99.44 |
| chr3 | 24205172 | 24208226 | 3055  | 0.01 | C_unshiu_00410 | 74310  | 77358  | 3049  | 1.38  | 99.67 |
| chr3 | 24210044 | 24211714 | 1671  | 0.01 | C_unshiu_00410 | 78385  | 80055  | 1671  | 0.76  | 99.88 |
| chr3 | 24212733 | 24216080 | 3348  | 0.01 | C_unshiu_00410 | 81200  | 84569  | 3370  | 1.52  | 98.01 |
| chr3 | 24221086 | 24239226 | 18141 | 0.07 | C_unshiu_00410 | 90282  | 108438 | 18157 | 8.21  | 99.1  |
| chr3 | 24239244 | 24242857 | 3614  | 0.01 | C_unshiu_00410 | 108320 | 111932 | 3613  | 1.63  | 99.7  |
| chr3 | 24242958 | 24245316 | 2359  | 0.01 | C_unshiu_00442 | 85084  | 82727  | 2358  | 1.12  | 99.11 |
| chr3 | 24254561 | 24255565 | 1005  | 0    | C_unshiu_00163 | 366128 | 367132 | 1005  | 0.27  | 100   |
| chr3 | 24255704 | 24259253 | 3550  | 0.01 | C_unshiu_02638 | 11589  | 15136  | 3548  | 16.75 | 98.54 |
| chr3 | 24285899 | 24291700 | 5802  | 0.02 | C_unshiu_00092 | 439698 | 433892 | 5807  | 1.24  | 98.92 |
| chr3 | 24301501 | 24307528 | 6028  | 0.02 | C_unshiu_00092 | 435675 | 429646 | 6030  | 1.29  | 99.27 |
| chr3 | 24314207 | 24316143 | 1937  | 0.01 | C_unshiu_00092 | 422256 | 420306 | 1951  | 0.42  | 98.77 |
| chr3 | 24339403 | 24343029 | 3627  | 0.01 | C_unshiu_00092 | 401525 | 397889 | 3637  | 0.78  | 98.93 |
| chr3 | 24350770 | 24352037 | 1268  | 0    | C_unshiu_00092 | 389859 | 388593 | 1267  | 0.27  | 99.68 |
| chr3 | 24352058 | 24354320 | 2263  | 0.01 | C_unshiu_00092 | 387707 | 385442 | 2266  | 0.49  | 98.77 |
| chr3 | 24357121 | 24360632 | 3512  | 0.01 | C_unshiu_00092 | 382056 | 378522 | 3535  | 0.76  | 99.16 |
| chr3 | 24361649 | 24363211 | 1563  | 0.01 | C_unshiu_00092 | 378212 | 376653 | 1560  | 0.33  | 99.04 |
| chr3 | 24370983 | 24377493 | 6511  | 0.02 | C_unshiu_00092 | 368585 | 362018 | 6568  | 1.41  | 98.08 |
| chr3 | 24386450 | 24390839 | 4390  | 0.02 | C_unshiu_00092 | 353012 | 348607 | 4406  | 0.94  | 98.23 |
| chr3 | 24406767 | 24421454 | 14688 | 0.05 | C_unshiu_00092 | 330760 | 316016 | 14745 | 3.16  | 99    |
| chr3 | 24423317 | 24443412 | 20096 | 0.07 | C_unshiu_00092 | 315358 | 295243 | 20116 | 4.31  | 99.25 |
| chr3 | 24453865 | 24458430 | 4566  | 0.02 | C_unshiu_00092 | 286471 | 281895 | 4577  | 0.98  | 99.54 |
| chr3 | 24458451 | 24474415 | 15965 | 0.06 | C_unshiu_00092 | 281364 | 265305 | 16060 | 3.44  | 98.92 |
| chr3 | 24474917 | 24477603 | 2687  | 0.01 | C_unshiu_00092 | 265320 | 262633 | 2688  | 0.58  | 99    |
| chr3 | 24481071 | 24488996 | 7926  | 0.03 | C_unshiu_00092 | 260319 | 252354 | 7966  | 1.71  | 98.42 |
| chr3 | 24505760 | 24511917 | 6158  | 0.02 | C_unshiu_00092 | 233472 | 227293 | 6180  | 1.32  | 99.24 |
| chr3 | 24521646 | 24526965 | 5320  | 0.02 | C_unshiu_00092 | 219728 | 214364 | 5365  | 1.15  | 98.1  |
| chr3 | 24549374 | 24552582 | 3209  | 0.01 | C_unshiu_01787 | 26661  | 23453  | 3209  | 6.54  | 100   |
| chr3 | 24577764 | 24579388 | 1625  | 0.01 | C_unshiu_00092 | 165741 | 164112 | 1630  | 0.35  | 99.02 |
| chr3 | 24579485 | 24586366 | 6882  | 0.02 | C_unshiu_00092 | 163643 | 156738 | 6906  | 1.48  | 98.74 |
| chr3 | 24599774 | 24602816 | 3043  | 0.01 | C_unshiu_00092 | 141125 | 138063 | 3063  | 0.66  | 98.24 |
| chr3 | 24603541 | 24613367 | 9827  | 0.04 | C_unshiu_00092 | 136741 | 126905 | 9837  | 2.11  | 99.26 |
| chr3 | 24636752 | 24642402 | 5651  | 0.02 | C_unshiu_00092 | 101880 | 96198  | 5683  | 1.22  | 98.86 |
| chr3 | 24643503 | 24650192 | 6690  | 0.02 | C_unshiu_00092 | 94576  | 87876  | 6701  | 1.43  | 99    |
| chr3 | 24674453 | 24682236 | 7784  | 0.03 | C_unshiu_00092 | 64121  | 56328  | 7794  | 1.67  | 99.22 |
| chr3 | 24682233 | 24687213 | 4981  | 0.02 | C_unshiu_00092 | 56370  | 51387  | 4984  | 1.07  | 98.58 |
| chr3 | 24687539 | 24725148 | 37610 | 0.14 | C_unshiu_00092 | 51398  | 13855  | 37544 | 8.04  | 98.42 |
| chr3 | 24721529 | 24725773 | 4245  | 0.02 | C_unshiu_01592 | 57719  | 53499  | 4221  | 7.3   | 98.45 |
| chr3 | 24730795 | 24732398 | 1604  | 0.01 | C_unshiu_00092 | 12199  | 10610  | 1590  | 0.34  | 99.13 |
| chr3 | 24733715 | 24737629 | 3915  | 0.01 | C_unshiu_00092 | 10726  | 6824   | 3903  | 0.84  | 98.21 |
| chr3 | 24739064 | 24745655 | 6592  | 0.02 | C_unshiu_01592 | 35096  | 28502  | 6595  | 11.41 | 98.7  |
| chr3 | 24747957 | 24755121 | 7165  | 0.03 | C_unshiu_01592 | 25411  | 18204  | 7208  | 12.47 | 98.27 |
| chr3 | 24763173 | 24765298 | 2126  | 0.01 | C_unshiu_01592 | 11419  | 9302   | 2118  | 3.66  | 98.22 |
| chr3 | 24768182 | 24772435 | 4254  | 0.02 | C_unshiu_01592 | 9995   | 5740   | 4256  | 7.36  | 99.88 |

|      |          |          |       |      |                |        |        |       |       |       |
|------|----------|----------|-------|------|----------------|--------|--------|-------|-------|-------|
| chr3 | 24772432 | 24778101 | 5670  | 0.02 | C_unshiu_01592 | 5701   | 1      | 5701  | 9.86  | 98.7  |
| chr3 | 24811866 | 24820051 | 8186  | 0.03 | C_unshiu_02217 | 27874  | 19684  | 8191  | 25.04 | 99.62 |
| chr3 | 24821252 | 24825233 | 3982  | 0.01 | C_unshiu_02217 | 18614  | 14620  | 3995  | 12.21 | 98.8  |
| chr3 | 24826125 | 24827142 | 1018  | 0    | C_unshiu_02823 | 3687   | 4705   | 1019  | 5.86  | 99.41 |
| chr3 | 24838113 | 24856091 | 17979 | 0.06 | C_unshiu_00509 | 130064 | 112155 | 17910 | 9.51  | 98.64 |
| chr3 | 24883314 | 24910823 | 27510 | 0.1  | C_unshiu_00509 | 82680  | 55068  | 27613 | 14.66 | 99.17 |
| chr3 | 24920377 | 24932114 | 11738 | 0.04 | C_unshiu_00509 | 46734  | 34972  | 11763 | 6.24  | 98.22 |
| chr3 | 24933810 | 24945536 | 11727 | 0.04 | C_unshiu_00509 | 33112  | 21305  | 11808 | 6.27  | 98.42 |
| chr3 | 24945620 | 24952261 | 6642  | 0.02 | C_unshiu_00509 | 21321  | 14660  | 6662  | 3.54  | 99.35 |
| chr3 | 24955583 | 24958041 | 2459  | 0.01 | C_unshiu_00509 | 11186  | 8713   | 2474  | 1.31  | 98.06 |
| chr3 | 25007190 | 25016053 | 8864  | 0.03 | C_unshiu_00123 | 128501 | 137371 | 8871  | 2.11  | 98.83 |
| chr3 | 25020578 | 25026602 | 6025  | 0.02 | C_unshiu_00123 | 141102 | 147136 | 6035  | 1.44  | 98.63 |
| chr3 | 25037822 | 25052173 | 14352 | 0.05 | C_unshiu_00123 | 158733 | 173099 | 14367 | 3.42  | 98.46 |
| chr3 | 25051516 | 25056311 | 4796  | 0.02 | C_unshiu_00490 | 6570   | 11371  | 4802  | 2.45  | 99.27 |
| chr3 | 25056315 | 25059614 | 3300  | 0.01 | C_unshiu_02902 | 12407  | 15706  | 3300  | 21.01 | 100   |
| chr3 | 25059142 | 25064796 | 5655  | 0.02 | C_unshiu_00490 | 15805  | 21478  | 5674  | 2.9   | 98.21 |
| chr3 | 25088391 | 25089941 | 1551  | 0.01 | C_unshiu_02680 | 20289  | 18736  | 1554  | 7.66  | 99.42 |
| chr3 | 25090118 | 25103624 | 13507 | 0.05 | C_unshiu_00490 | 47663  | 61207  | 13545 | 6.91  | 98.09 |
| chr3 | 25103622 | 25115229 | 11608 | 0.04 | C_unshiu_00490 | 61304  | 72902  | 11599 | 5.92  | 99.39 |
| chr3 | 25117253 | 25128417 | 11165 | 0.04 | C_unshiu_00490 | 75436  | 86631  | 11196 | 5.71  | 98.56 |
| chr3 | 25132490 | 25138958 | 6469  | 0.02 | C_unshiu_00490 | 90902  | 97426  | 6525  | 3.33  | 98.21 |
| chr3 | 25139031 | 25140980 | 1950  | 0.01 | C_unshiu_00490 | 97425  | 99381  | 1957  | 1     | 99.59 |
| chr3 | 25148272 | 25152038 | 3767  | 0.01 | C_unshiu_00490 | 103342 | 107119 | 3778  | 1.93  | 98.07 |
| chr3 | 25206606 | 25227561 | 20956 | 0.08 | C_unshiu_01105 | 95718  | 74721  | 20998 | 21.94 | 99.06 |
| chr3 | 25230672 | 25240424 | 9753  | 0.04 | C_unshiu_01105 | 70554  | 60776  | 9779  | 10.22 | 98.97 |
| chr3 | 25241290 | 25244714 | 3425  | 0.01 | C_unshiu_01105 | 59877  | 56436  | 3442  | 3.6   | 98.64 |
| chr3 | 25244841 | 25247993 | 3153  | 0.01 | C_unshiu_01105 | 56436  | 53270  | 3167  | 3.31  | 98.3  |
| chr3 | 25247990 | 25253510 | 5521  | 0.02 | C_unshiu_01105 | 53529  | 47949  | 5581  | 5.83  | 98.17 |
| chr3 | 25254948 | 25256363 | 1416  | 0.01 | C_unshiu_01105 | 46121  | 44706  | 1416  | 1.48  | 100   |
| chr3 | 25271081 | 25286866 | 15786 | 0.06 | C_unshiu_01105 | 28172  | 12335  | 15838 | 16.55 | 99.14 |
| chr3 | 25299506 | 25303468 | 3963  | 0.01 | C_unshiu_01144 | 6729   | 10651  | 3923  | 4.29  | 98.56 |
| chr3 | 25312143 | 25324340 | 12198 | 0.04 | C_unshiu_01144 | 21610  | 33803  | 12194 | 13.33 | 98.56 |
| chr3 | 25330389 | 25334248 | 3860  | 0.01 | C_unshiu_02400 | 24536  | 20686  | 3851  | 14.11 | 99.02 |
| chr3 | 25332597 | 25334248 | 1652  | 0.01 | C_unshiu_01144 | 36269  | 37924  | 1656  | 1.81  | 99.09 |
| chr3 | 25337005 | 25349364 | 12360 | 0.04 | C_unshiu_01144 | 40888  | 53243  | 12356 | 13.5  | 99.57 |
| chr3 | 25350002 | 25353132 | 3131  | 0.01 | C_unshiu_01144 | 53236  | 56404  | 3169  | 3.46  | 98.08 |
| chr3 | 25354064 | 25365227 | 11164 | 0.04 | C_unshiu_01144 | 57857  | 69089  | 11233 | 12.28 | 98.37 |
| chr3 | 25373722 | 25379801 | 6080  | 0.02 | C_unshiu_01325 | 75304  | 69265  | 6040  | 8.02  | 98.49 |
| chr3 | 25385813 | 25389385 | 3573  | 0.01 | C_unshiu_01144 | 87924  | 91496  | 3573  | 3.91  | 99.24 |
| chr3 | 25399500 | 25429550 | 30051 | 0.11 | C_unshiu_01325 | 49201  | 19175  | 30027 | 39.87 | 98.49 |
| chr3 | 25431258 | 25434316 | 3059  | 0.01 | C_unshiu_01325 | 19014  | 15965  | 3050  | 4.05  | 99.35 |
| chr3 | 25434496 | 25436692 | 2197  | 0.01 | C_unshiu_01077 | 14706  | 16924  | 2219  | 2.26  | 98.78 |
| chr3 | 25436697 | 25440946 | 4250  | 0.02 | C_unshiu_01325 | 16044  | 11791  | 4254  | 5.65  | 99.41 |
| chr3 | 25440921 | 25444675 | 3755  | 0.01 | C_unshiu_01325 | 11649  | 7899   | 3751  | 4.98  | 98.12 |
| chr3 | 25452463 | 25456869 | 4407  | 0.02 | C_unshiu_01077 | 31352  | 35771  | 4420  | 4.5   | 98.69 |
| chr3 | 25459435 | 25466464 | 7030  | 0.03 | C_unshiu_03068 | 7062   | 1      | 7062  | 66.24 | 98.54 |
| chr3 | 25464510 | 25477905 | 13396 | 0.05 | C_unshiu_01313 | 1      | 13432  | 13432 | 17.66 | 98.86 |
| chr3 | 25490389 | 25493528 | 3140  | 0.01 | C_unshiu_01077 | 60437  | 63563  | 3127  | 3.19  | 98.45 |
| chr3 | 25494059 | 25498142 | 4084  | 0.01 | C_unshiu_00534 | 1      | 4085   | 4085  | 2.24  | 99.78 |
| chr3 | 25498135 | 25499907 | 1773  | 0.01 | C_unshiu_00534 | 5028   | 6787   | 1760  | 0.97  | 98.76 |
| chr3 | 25499887 | 25535846 | 35960 | 0.13 | C_unshiu_00534 | 7057   | 43102  | 36046 | 19.76 | 98.97 |
| chr3 | 25535941 | 25541683 | 5743  | 0.02 | C_unshiu_00534 | 43105  | 48858  | 5754  | 3.16  | 99.11 |
| chr3 | 25542119 | 25546500 | 4382  | 0.02 | C_unshiu_00534 | 51697  | 56103  | 4407  | 2.42  | 98.3  |
| chr3 | 25562817 | 25570298 | 7482  | 0.03 | C_unshiu_00343 | 111761 | 119289 | 7529  | 3.04  | 98.28 |
| chr3 | 25570290 | 25594159 | 23870 | 0.09 | C_unshiu_00343 | 120898 | 144839 | 23942 | 9.65  | 98.09 |
| chr3 | 25615228 | 25618847 | 3620  | 0.01 | C_unshiu_00343 | 163052 | 166669 | 3618  | 1.46  | 98.73 |
| chr3 | 25635043 | 25640703 | 5661  | 0.02 | C_unshiu_00343 | 183095 | 188745 | 5651  | 2.28  | 98.64 |
| chr3 | 25643564 | 25654280 | 10717 | 0.04 | C_unshiu_00343 | 191643 | 202388 | 10746 | 4.33  | 99.04 |
| chr3 | 25654285 | 25665970 | 11686 | 0.04 | C_unshiu_00343 | 202746 | 214467 | 11722 | 4.73  | 98.55 |
| chr3 | 25693869 | 25697220 | 3352  | 0.01 | C_unshiu_01924 | 35411  | 32061  | 3351  | 7.64  | 99.22 |
| chr3 | 25709666 | 25728330 | 18665 | 0.07 | C_unshiu_01924 | 18703  | 1      | 18703 | 42.62 | 98.84 |
| chr3 | 25732228 | 25748881 | 16654 | 0.06 | C_unshiu_00223 | 29521  | 46134  | 16614 | 5.29  | 98.25 |
| chr3 | 25771363 | 25777946 | 6584  | 0.02 | C_unshiu_00223 | 68307  | 74913  | 6607  | 2.1   | 98.49 |
| chr3 | 25778125 | 25783421 | 5297  | 0.02 | C_unshiu_00223 | 75483  | 80811  | 5329  | 1.7   | 98.65 |
| chr3 | 25784873 | 25791576 | 6704  | 0.02 | C_unshiu_00223 | 82504  | 89229  | 6726  | 2.14  | 98.83 |
| chr3 | 25850310 | 25861132 | 10823 | 0.04 | C_unshiu_00223 | 150325 | 161134 | 10810 | 3.44  | 98.08 |
| chr3 | 25863437 | 25893024 | 29588 | 0.11 | C_unshiu_00223 | 162996 | 192641 | 29646 | 9.44  | 98.52 |
| chr3 | 25899751 | 25904888 | 5138  | 0.02 | C_unshiu_00223 | 200013 | 205184 | 5172  | 1.65  | 98.19 |
| chr3 | 25928074 | 25930898 | 2825  | 0.01 | C_unshiu_00223 | 230272 | 233091 | 2820  | 0.9   | 98.94 |
| chr3 | 25931915 | 25937440 | 5526  | 0.02 | C_unshiu_00523 | 19619  | 25180  | 5562  | 3     | 98.55 |
| chr3 | 25940596 | 25944012 | 3417  | 0.01 | C_unshiu_00541 | 180741 | 177326 | 3416  | 1.89  | 99.5  |
| chr3 | 25946649 | 25953404 | 6756  | 0.02 | C_unshiu_00541 | 176153 | 169431 | 6723  | 3.72  | 98.13 |
| chr3 | 25961892 | 25990279 | 28388 | 0.1  | C_unshiu_00541 | 159760 | 131350 | 28411 | 15.72 | 98.13 |
| chr3 | 25990438 | 25996435 | 5998  | 0.02 | C_unshiu_00541 | 131346 | 125336 | 6011  | 3.33  | 99.12 |
| chr3 | 26002541 | 26009426 | 6886  | 0.02 | C_unshiu_00541 | 120328 | 113414 | 6915  | 3.83  | 99.1  |
| chr3 | 26013234 | 26017289 | 4056  | 0.01 | C_unshiu_00541 | 108872 | 104827 | 4046  | 2.24  | 98.16 |
| chr3 | 26034352 | 26039448 | 5097  | 0.02 | C_unshiu_00541 | 86427  | 81328  | 5100  | 2.82  | 98.13 |
| chr3 | 26071320 | 26072711 | 1392  | 0.01 | C_unshiu_00541 | 51640  | 50249  | 1392  | 0.77  | 100   |
| chr3 | 26072709 | 26076169 | 3461  | 0.01 | C_unshiu_00541 | 50215  | 46751  | 3465  | 1.92  | 99.31 |

|      |          |          |       |      |                |        |        |       |       |       |
|------|----------|----------|-------|------|----------------|--------|--------|-------|-------|-------|
| chr3 | 26087301 | 26113119 | 25819 | 0.09 | C_unshiu_00541 | 36690  | 10802  | 25889 | 14.32 | 98.49 |
| chr3 | 26113113 | 26114385 | 1273  | 0    | C_unshiu_00474 | 83689  | 84961  | 1273  | 0.63  | 100   |
| chr3 | 26114660 | 26126645 | 11986 | 0.04 | C_unshiu_00495 | 13401  | 25404  | 12004 | 6.23  | 98.88 |
| chr3 | 26126656 | 26135630 | 8975  | 0.03 | C_unshiu_00495 | 25913  | 34951  | 9039  | 4.69  | 98.23 |
| chr3 | 26142474 | 26168701 | 26228 | 0.09 | C_unshiu_00495 | 40548  | 66921  | 26374 | 13.7  | 98.19 |
| chr3 | 26168686 | 26194654 | 25969 | 0.09 | C_unshiu_00495 | 67288  | 93323  | 26036 | 13.52 | 98.93 |
| chr3 | 26197376 | 26203380 | 6005  | 0.02 | C_unshiu_00609 | 41574  | 47587  | 6014  | 3.64  | 98.57 |
| chr3 | 26223266 | 26225337 | 2072  | 0.01 | C_unshiu_00609 | 61662  | 63743  | 2082  | 1.26  | 99.14 |
| chr3 | 26232405 | 26242671 | 10267 | 0.04 | C_unshiu_00609 | 72443  | 82766  | 10324 | 6.26  | 98.78 |
| chr3 | 26250022 | 26252146 | 2125  | 0.01 | C_unshiu_00609 | 91637  | 93770  | 2134  | 1.29  | 98.36 |
| chr3 | 26262980 | 26269754 | 6775  | 0.02 | C_unshiu_00609 | 106459 | 113283 | 6825  | 4.14  | 98.37 |
| chr3 | 26272804 | 26305193 | 32390 | 0.12 | C_unshiu_00609 | 117916 | 150362 | 32447 | 19.66 | 98.7  |
| chr3 | 26305222 | 26307733 | 2512  | 0.01 | C_unshiu_00609 | 150235 | 152746 | 2512  | 1.52  | 98.89 |
| chr3 | 26308507 | 26310213 | 1707  | 0.01 | C_unshiu_00609 | 153674 | 155382 | 1709  | 1.04  | 98.13 |
| chr3 | 26327680 | 26329657 | 1978  | 0.01 | C_unshiu_01070 | 4975   | 6952   | 1978  | 2     | 98.79 |
| chr3 | 26330932 | 26332558 | 1627  | 0.01 | C_unshiu_01070 | 7169   | 8800   | 1632  | 1.65  | 98.41 |
| chr3 | 26335998 | 26339773 | 3776  | 0.01 | C_unshiu_01070 | 15055  | 18819  | 3765  | 3.81  | 99.34 |
| chr3 | 26369490 | 26377546 | 8057  | 0.03 | C_unshiu_01070 | 41901  | 49962  | 8062  | 8.17  | 98.32 |
| chr3 | 26402141 | 26415761 | 13621 | 0.05 | C_unshiu_01070 | 67785  | 81493  | 13709 | 13.89 | 98.59 |
| chr3 | 26415777 | 26419020 | 3244  | 0.01 | C_unshiu_01070 | 81841  | 85084  | 3244  | 3.29  | 99.66 |
| chr3 | 26430254 | 26432571 | 2318  | 0.01 | C_unshiu_01070 | 96397  | 98715  | 2319  | 2.35  | 99.4  |
| chr3 | 26432831 | 26446982 | 14152 | 0.05 | C_unshiu_00503 | 19310  | 33619  | 14310 | 7.5   | 98.15 |
| chr3 | 26446980 | 26450326 | 3347  | 0.01 | C_unshiu_00503 | 33889  | 37236  | 3348  | 1.75  | 99.43 |
| chr3 | 26453006 | 26458070 | 5065  | 0.02 | C_unshiu_00503 | 40593  | 45661  | 5069  | 2.65  | 98.11 |
| chr3 | 26466166 | 26501016 | 34851 | 0.13 | C_unshiu_00503 | 50192  | 85105  | 34914 | 18.29 | 99.19 |
| chr3 | 26506117 | 26508539 | 2423  | 0.01 | C_unshiu_01088 | 80058  | 82481  | 2424  | 2.49  | 99.71 |
| chr3 | 26510016 | 26511361 | 1346  | 0    | C_unshiu_01088 | 84167  | 85512  | 1346  | 1.38  | 100   |
| chr3 | 26511380 | 26519652 | 8273  | 0.03 | C_unshiu_01088 | 85453  | 93713  | 8261  | 8.49  | 99.28 |
| chr3 | 26521025 | 26523725 | 2701  | 0.01 | C_unshiu_01088 | 94584  | 97285  | 2702  | 2.78  | 99.41 |
| chr3 | 26539735 | 26555629 | 15895 | 0.06 | C_unshiu_00503 | 118734 | 134613 | 15880 | 8.32  | 98.49 |
| chr3 | 26587750 | 26590361 | 2612  | 0.01 | C_unshiu_00503 | 167713 | 170326 | 2614  | 1.37  | 99.58 |
| chr3 | 26604710 | 26613326 | 8617  | 0.03 | C_unshiu_00503 | 182282 | 190926 | 8645  | 4.53  | 98.22 |
| chr3 | 26610811 | 26636227 | 25417 | 0.09 | C_unshiu_01359 | 21444  | 46861  | 25418 | 34.54 | 98.59 |
| chr3 | 26637197 | 26643937 | 6741  | 0.02 | C_unshiu_01359 | 48003  | 54738  | 6736  | 9.15  | 99.32 |
| chr3 | 26653022 | 26658779 | 5758  | 0.02 | C_unshiu_00850 | 19106  | 24853  | 5748  | 4.69  | 99.69 |
| chr3 | 26659778 | 26702161 | 42384 | 0.15 | C_unshiu_00850 | 23232  | 65736  | 42505 | 34.67 | 98.54 |
| chr3 | 26704246 | 26706567 | 2322  | 0.01 | C_unshiu_00597 | 161065 | 158744 | 2322  | 1.38  | 100   |
| chr3 | 26726862 | 26732585 | 5724  | 0.02 | C_unshiu_00850 | 85713  | 91469  | 5757  | 4.7   | 98.78 |
| chr3 | 26734255 | 26742547 | 8293  | 0.03 | C_unshiu_00850 | 95429  | 103765 | 8337  | 6.8   | 98.03 |
| chr3 | 26744691 | 26746922 | 2232  | 0.01 | C_unshiu_00850 | 105263 | 107499 | 2237  | 1.82  | 98.26 |
| chr3 | 26749006 | 26762676 | 13671 | 0.05 | C_unshiu_00850 | 107829 | 121521 | 13693 | 11.17 | 98.7  |
| chr3 | 26767423 | 26769170 | 1748  | 0.01 | C_unshiu_01206 | 6433   | 8181   | 1749  | 2.06  | 99.49 |
| chr3 | 26791799 | 26793281 | 1483  | 0.01 | C_unshiu_00231 | 300001 | 301485 | 1485  | 0.48  | 99.39 |
| chr3 | 26804004 | 26807544 | 3541  | 0.01 | C_unshiu_00388 | 3540   | 1      | 3540  | 1.57  | 99.66 |
| chr3 | 26816441 | 26823684 | 7244  | 0.03 | C_unshiu_00838 | 23776  | 31043  | 7268  | 5.87  | 98.98 |
| chr3 | 26845487 | 26846738 | 1252  | 0    | C_unshiu_00272 | 43960  | 45211  | 1252  | 0.45  | 100   |
| chr3 | 26854076 | 26867911 | 13836 | 0.05 | C_unshiu_00838 | 51909  | 65829  | 13921 | 11.24 | 98.3  |
| chr3 | 26867895 | 26869971 | 2077  | 0.01 | C_unshiu_00838 | 66050  | 68126  | 2077  | 1.68  | 99.47 |
| chr3 | 26899196 | 26903525 | 4330  | 0.02 | C_unshiu_00838 | 82902  | 87243  | 4342  | 3.5   | 99.38 |
| chr3 | 26925426 | 26929328 | 3903  | 0.01 | C_unshiu_01206 | 84794  | 80886  | 3909  | 4.61  | 98.7  |
| chr3 | 26925524 | 26935049 | 9526  | 0.03 | C_unshiu_00838 | 107762 | 117322 | 9561  | 7.72  | 98.82 |
| chr3 | 26935044 | 26941004 | 5961  | 0.02 | C_unshiu_00838 | 117391 | 123427 | 6037  | 4.87  | 98.33 |
| chr3 | 26950991 | 26952370 | 1380  | 0    | C_unshiu_01206 | 60374  | 58995  | 1380  | 1.63  | 99.64 |
| chr3 | 26960332 | 26979399 | 19068 | 0.07 | C_unshiu_01206 | 50837  | 31760  | 19078 | 22.49 | 98.93 |
| chr3 | 26982932 | 26985195 | 2264  | 0.01 | C_unshiu_00231 | 300223 | 297956 | 2268  | 0.74  | 99.65 |
| chr3 | 26995168 | 27013253 | 18086 | 0.07 | C_unshiu_00175 | 112274 | 130268 | 17995 | 4.96  | 99.04 |
| chr3 | 27013493 | 27031032 | 17540 | 0.06 | C_unshiu_00175 | 131113 | 148699 | 17587 | 4.85  | 99.08 |
| chr3 | 27031151 | 27040064 | 8914  | 0.03 | C_unshiu_00175 | 148673 | 157586 | 8914  | 2.46  | 98.25 |
| chr3 | 27044668 | 27045882 | 1215  | 0    | C_unshiu_00175 | 158013 | 159227 | 1215  | 0.34  | 98.02 |
| chr3 | 27051439 | 27064705 | 13267 | 0.05 | C_unshiu_00175 | 163888 | 177220 | 13333 | 3.68  | 98.7  |
| chr3 | 27064776 | 27074519 | 9744  | 0.04 | C_unshiu_00175 | 177219 | 186972 | 9754  | 2.69  | 99.62 |
| chr3 | 27074518 | 27081298 | 6781  | 0.02 | C_unshiu_00175 | 186933 | 193746 | 6814  | 1.88  | 99.22 |
| chr3 | 27091917 | 27105716 | 13800 | 0.05 | C_unshiu_00175 | 201571 | 215343 | 13773 | 3.8   | 99.27 |
| chr3 | 27108041 | 27116033 | 7993  | 0.03 | C_unshiu_00175 | 217395 | 225409 | 8015  | 2.21  | 99.16 |
| chr3 | 27118054 | 27124719 | 6666  | 0.02 | C_unshiu_00175 | 225403 | 232075 | 6673  | 1.84  | 99.57 |
| chr3 | 27127084 | 27129668 | 2585  | 0.01 | C_unshiu_01705 | 37513  | 34929  | 2585  | 4.95  | 99.5  |
| chr3 | 27129666 | 27164409 | 34744 | 0.13 | C_unshiu_01705 | 34684  | 1      | 34684 | 66.39 | 99.72 |
| chr3 | 27191208 | 27194625 | 3418  | 0.01 | C_unshiu_01655 | 10086  | 6669   | 3418  | 6.21  | 100   |
| chr3 | 27194663 | 27200435 | 5773  | 0.02 | C_unshiu_01655 | 6255   | 482    | 5774  | 10.5  | 99.74 |
| chr3 | 27201094 | 27219142 | 18049 | 0.07 | C_unshiu_02095 | 13089  | 31135  | 18047 | 49.09 | 99.19 |
| chr3 | 27232612 | 27246717 | 14106 | 0.05 | C_unshiu_02688 | 1      | 14057  | 14057 | 69.89 | 98.22 |
| chr3 | 27247671 | 27251348 | 3678  | 0.01 | C_unshiu_02688 | 16437  | 20114  | 3678  | 18.29 | 99.97 |
| chr3 | 27271243 | 27274580 | 3338  | 0.01 | C_unshiu_00180 | 14734  | 11411  | 3324  | 0.93  | 98.71 |
| chr3 | 27274792 | 27276211 | 1420  | 0.01 | C_unshiu_00435 | 192464 | 191043 | 1422  | 0.67  | 99.86 |
| chr3 | 27279721 | 27281289 | 1569  | 0.01 | C_unshiu_00435 | 190719 | 189151 | 1569  | 0.73  | 99.75 |
| chr3 | 27288034 | 27289743 | 1710  | 0.01 | C_unshiu_00435 | 185454 | 183744 | 1711  | 0.8   | 99.47 |
| chr3 | 27302599 | 27305543 | 2945  | 0.01 | C_unshiu_00467 | 94753  | 97697  | 2945  | 1.45  | 100   |
| chr3 | 27313299 | 27338044 | 24746 | 0.09 | C_unshiu_01056 | 66186  | 41380  | 24807 | 24.89 | 98.67 |
| chr3 | 27338341 | 27340985 | 2645  | 0.01 | C_unshiu_01056 | 40605  | 37979  | 2627  | 2.64  | 98.75 |

|      |          |          |        |      |                |        |        |        |       |       |
|------|----------|----------|--------|------|----------------|--------|--------|--------|-------|-------|
| chr3 | 27341458 | 27353871 | 12414  | 0.04 | C_unshiu_01056 | 37282  | 24853  | 12430  | 12.47 | 98.1  |
| chr3 | 27370829 | 27372837 | 2009   | 0.01 | C_unshiu_01056 | 12717  | 10701  | 2017   | 2.02  | 98.67 |
| chr3 | 27398995 | 27400235 | 1241   | 0    | C_unshiu_00672 | 148889 | 147655 | 1235   | 0.82  | 98.87 |
| chr3 | 27400253 | 27405668 | 5416   | 0.02 | C_unshiu_00672 | 147436 | 142021 | 5416   | 3.59  | 99.94 |
| chr3 | 27420641 | 27425611 | 4971   | 0.02 | C_unshiu_00916 | 83971  | 88976  | 5006   | 4.35  | 98.22 |
| chr3 | 27432427 | 27440170 | 7744   | 0.03 | C_unshiu_00916 | 95794  | 103506 | 7713   | 6.7   | 99.44 |
| chr3 | 27441986 | 27448815 | 6830   | 0.02 | C_unshiu_00672 | 125770 | 118951 | 6820   | 4.52  | 98.83 |
| chr3 | 27447415 | 27450328 | 2914   | 0.01 | C_unshiu_00916 | 110889 | 113774 | 2886   | 2.51  | 98.01 |
| chr3 | 27452483 | 27461775 | 9293   | 0.03 | C_unshiu_00672 | 116794 | 107484 | 9311   | 6.17  | 98.75 |
| chr3 | 27465216 | 27474072 | 8857   | 0.03 | C_unshiu_00672 | 102541 | 93606  | 8936   | 5.92  | 98.58 |
| chr3 | 27471221 | 27481436 | 10216  | 0.04 | C_unshiu_01970 | 37937  | 27766  | 10172  | 24.39 | 98.39 |
| chr3 | 27488142 | 27509632 | 21491  | 0.08 | C_unshiu_01970 | 21505  | 8      | 21498  | 51.55 | 99.73 |
| chr3 | 27505034 | 27526344 | 21311  | 0.08 | C_unshiu_01551 | 60460  | 39151  | 21310  | 35.25 | 99.97 |
| chr3 | 27526520 | 27542272 | 15753  | 0.06 | C_unshiu_01551 | 38554  | 22798  | 15757  | 26.06 | 99.66 |
| chr3 | 27542264 | 27544552 | 2289   | 0.01 | C_unshiu_00081 | 460927 | 463215 | 2289   | 0.48  | 100   |
| chr3 | 27591179 | 27592494 | 1316   | 0    | C_unshiu_00090 | 13121  | 11806  | 1316   | 0.28  | 100   |
| chr3 | 27597875 | 27602076 | 4202   | 0.02 | C_unshiu_00090 | 6796   | 2603   | 4194   | 0.9   | 98.95 |
| chr3 | 27602397 | 27608187 | 5791   | 0.02 | C_unshiu_00664 | 148223 | 142461 | 5763   | 3.76  | 98.5  |
| chr3 | 27609204 | 27613105 | 3902   | 0.01 | C_unshiu_00664 | 140107 | 136184 | 3924   | 2.56  | 98.17 |
| chr3 | 27613114 | 27616373 | 3260   | 0.01 | C_unshiu_00664 | 136006 | 132743 | 3264   | 2.13  | 98.47 |
| chr3 | 27618160 | 27619524 | 1365   | 0    | C_unshiu_00664 | 130749 | 129385 | 1365   | 0.89  | 99.85 |
| chr3 | 27626501 | 27634661 | 8161   | 0.03 | C_unshiu_00664 | 116383 | 108204 | 8180   | 5.34  | 98.88 |
| chr3 | 27643123 | 27658052 | 14930  | 0.05 | C_unshiu_00637 | 56045  | 70979  | 14935  | 9.35  | 98.26 |
| chr4 | 11683    | 21494    | 9812   | 0.05 | C_unshiu_00086 | 409782 | 419593 | 9812   | 2.08  | 100   |
| chr4 | 21517    | 28163    | 6647   | 0.03 | C_unshiu_00086 | 420891 | 427536 | 6646   | 1.41  | 99.89 |
| chr4 | 36591    | 69666    | 33076  | 0.16 | C_unshiu_00765 | 93430  | 60620  | 32811  | 24.49 | 98.93 |
| chr4 | 68559    | 111633   | 43075  | 0.21 | C_unshiu_00765 | 58818  | 15741  | 43078  | 32.15 | 99.93 |
| chr4 | 115126   | 130519   | 15394  | 0.07 | C_unshiu_00765 | 15357  | 1      | 15357  | 11.46 | 99.64 |
| chr4 | 135467   | 165995   | 30529  | 0.15 | C_unshiu_00868 | 1      | 30524  | 30524  | 25.29 | 99.97 |
| chr4 | 165835   | 174790   | 8956   | 0.04 | C_unshiu_00868 | 30459  | 39414  | 8956   | 7.42  | 99.83 |
| chr4 | 174980   | 180404   | 5425   | 0.03 | C_unshiu_00868 | 39786  | 45221  | 5436   | 4.5   | 99.8  |
| chr4 | 181531   | 183443   | 1913   | 0.01 | C_unshiu_00868 | 46686  | 48606  | 1921   | 1.59  | 98.91 |
| chr4 | 183496   | 186683   | 3188   | 0.02 | C_unshiu_00868 | 49017  | 52212  | 3196   | 2.65  | 99.75 |
| chr4 | 189966   | 191927   | 1962   | 0.01 | C_unshiu_00420 | 185959 | 183998 | 1962   | 0.9   | 99.95 |
| chr4 | 191919   | 197748   | 5830   | 0.03 | C_unshiu_00868 | 57648  | 63501  | 5854   | 4.85  | 98.66 |
| chr4 | 197752   | 221182   | 23431  | 0.11 | C_unshiu_00868 | 63713  | 87155  | 23443  | 19.42 | 99.77 |
| chr4 | 227136   | 229571   | 2436   | 0.01 | C_unshiu_00868 | 92346  | 94779  | 2434   | 2.02  | 99.71 |
| chr4 | 233761   | 235048   | 1288   | 0.01 | C_unshiu_01357 | 12324  | 11037  | 1288   | 1.75  | 98.29 |
| chr4 | 238170   | 239993   | 1824   | 0.01 | C_unshiu_00868 | 99750  | 101571 | 1822   | 1.51  | 99.62 |
| chr4 | 240414   | 242130   | 1717   | 0.01 | C_unshiu_00868 | 102438 | 104154 | 1717   | 1.42  | 100   |
| chr4 | 243432   | 255430   | 11999  | 0.06 | C_unshiu_00868 | 104755 | 116752 | 11998  | 9.94  | 98.62 |
| chr4 | 256343   | 259254   | 2912   | 0.01 | C_unshiu_01670 | 28338  | 31248  | 2911   | 5.38  | 99.52 |
| chr4 | 266260   | 280472   | 14213  | 0.07 | C_unshiu_02035 | 489    | 14682  | 14194  | 36.07 | 99.63 |
| chr4 | 291974   | 296488   | 4515   | 0.02 | C_unshiu_00168 | 2676   | 7196   | 4521   | 1.23  | 99.87 |
| chr4 | 296489   | 301543   | 5055   | 0.02 | C_unshiu_00168 | 7779   | 12833  | 5055   | 1.37  | 100   |
| chr4 | 305437   | 346180   | 40744  | 0.19 | C_unshiu_00168 | 13249  | 53964  | 40716  | 11.06 | 99.84 |
| chr4 | 349526   | 369100   | 19575  | 0.09 | C_unshiu_00168 | 57007  | 76481  | 19475  | 5.29  | 98.53 |
| chr4 | 369263   | 375442   | 6180   | 0.03 | C_unshiu_00168 | 76505  | 82684  | 6180   | 1.68  | 100   |
| chr4 | 376364   | 429271   | 52908  | 0.25 | C_unshiu_00168 | 84051  | 136964 | 52914  | 14.38 | 99.97 |
| chr4 | 430583   | 515577   | 84995  | 0.41 | C_unshiu_00168 | 137333 | 222329 | 84997  | 23.1  | 99.98 |
| chr4 | 495579   | 546343   | 50765  | 0.24 | C_unshiu_00168 | 202325 | 253089 | 50765  | 13.79 | 99.98 |
| chr4 | 526339   | 637826   | 111488 | 0.53 | C_unshiu_00168 | 233091 | 344566 | 111476 | 30.29 | 99.98 |
| chr4 | 617821   | 653546   | 35726  | 0.17 | C_unshiu_00168 | 324567 | 360291 | 35725  | 9.71  | 99.96 |
| chr4 | 653463   | 661190   | 7728   | 0.04 | C_unshiu_00168 | 360282 | 368009 | 7728   | 2.1   | 99.97 |
| chr4 | 654221   | 691113   | 36893  | 0.18 | C_unshiu_02038 | 39200  | 2320   | 36881  | 94.08 | 99.95 |
| chr4 | 671117   | 693131   | 22015  | 0.11 | C_unshiu_02038 | 22306  | 322    | 21985  | 56.08 | 99.86 |
| chr4 | 695407   | 707615   | 12209  | 0.06 | C_unshiu_00944 | 62840  | 75010  | 12171  | 10.86 | 98.9  |
| chr4 | 708757   | 720840   | 12084  | 0.06 | C_unshiu_00944 | 76351  | 88434  | 12084  | 10.78 | 99.86 |
| chr4 | 725742   | 727826   | 2085   | 0.01 | C_unshiu_00944 | 93914  | 95998  | 2085   | 1.86  | 99.81 |
| chr4 | 727827   | 729371   | 1545   | 0.01 | C_unshiu_00052 | 551681 | 553225 | 1545   | 0.26  | 100   |
| chr4 | 733078   | 744578   | 11501  | 0.05 | C_unshiu_00944 | 100537 | 112082 | 11546  | 10.3  | 99.44 |
| chr4 | 743705   | 746483   | 2779   | 0.01 | C_unshiu_01071 | 87158  | 84407  | 2752   | 2.79  | 98.74 |
| chr4 | 785685   | 787121   | 1437   | 0.01 | C_unshiu_00408 | 143438 | 141989 | 1450   | 0.65  | 98.08 |
| chr4 | 787867   | 791138   | 3272   | 0.02 | C_unshiu_00408 | 140647 | 137355 | 3293   | 1.49  | 98.48 |
| chr4 | 813710   | 826078   | 12369  | 0.06 | C_unshiu_00408 | 129256 | 116904 | 12353  | 5.58  | 99.52 |
| chr4 | 829057   | 838425   | 9369   | 0.04 | C_unshiu_00408 | 115754 | 106351 | 9404   | 4.25  | 99.1  |
| chr4 | 840547   | 846274   | 5728   | 0.03 | C_unshiu_00408 | 106779 | 101052 | 5728   | 2.59  | 100   |
| chr4 | 849036   | 856437   | 7402   | 0.04 | C_unshiu_00408 | 96314  | 88916  | 7399   | 3.34  | 98.92 |
| chr4 | 878274   | 879555   | 1282   | 0.01 | C_unshiu_01764 | 21058  | 22339  | 1282   | 2.57  | 100   |
| chr4 | 920345   | 926341   | 5997   | 0.03 | C_unshiu_01001 | 43476  | 37464  | 6013   | 5.67  | 99.09 |
| chr4 | 926370   | 928882   | 2513   | 0.01 | C_unshiu_00128 | 129069 | 126557 | 2513   | 0.61  | 100   |
| chr4 | 928875   | 945806   | 16932  | 0.08 | C_unshiu_01001 | 35988  | 19055  | 16934  | 15.98 | 99.51 |
| chr4 | 980054   | 985695   | 5642   | 0.03 | C_unshiu_00833 | 124573 | 119005 | 5569   | 4.47  | 98.09 |
| chr4 | 991631   | 993148   | 1518   | 0.01 | C_unshiu_00833 | 118286 | 116766 | 1521   | 1.22  | 98.49 |
| chr4 | 995878   | 1088862  | 92985  | 0.44 | C_unshiu_00059 | 122922 | 215902 | 92981  | 15.8  | 99.93 |
| chr4 | 1091621  | 1150014  | 58394  | 0.28 | C_unshiu_00059 | 219240 | 277507 | 58268  | 9.9   | 99.2  |
| chr4 | 1129968  | 1254740  | 124773 | 0.6  | C_unshiu_00059 | 257463 | 382235 | 124773 | 21.2  | 99.96 |
| chr4 | 1234739  | 1265487  | 30749  | 0.15 | C_unshiu_00059 | 362232 | 392890 | 30659  | 5.21  | 99.11 |
| chr4 | 1264521  | 1277152  | 12632  | 0.06 | C_unshiu_00059 | 392407 | 405034 | 12628  | 2.15  | 99.94 |

|      |         |         |        |      |                |        |        |        |       |       |
|------|---------|---------|--------|------|----------------|--------|--------|--------|-------|-------|
| chr4 | 1277360 | 1278647 | 1288   | 0.01 | C_unshiu_02956 | 11762  | 13050  | 1289   | 9.05  | 99.15 |
| chr4 | 1282202 | 1283489 | 1288   | 0.01 | C_unshiu_00225 | 289522 | 290809 | 1288   | 0.41  | 100   |
| chr4 | 1285244 | 1298883 | 13640  | 0.07 | C_unshiu_00438 | 128237 | 114606 | 13632  | 6.42  | 99.22 |
| chr4 | 1299704 | 1321734 | 22031  | 0.11 | C_unshiu_00636 | 906    | 22743  | 21838  | 13.67 | 98.19 |
| chr4 | 1323606 | 1330519 | 6914   | 0.03 | C_unshiu_01436 | 60953  | 53987  | 6967   | 10.25 | 98.41 |
| chr4 | 1332483 | 1342250 | 9768   | 0.05 | C_unshiu_01436 | 53923  | 44156  | 9768   | 14.38 | 100   |
| chr4 | 1342251 | 1382748 | 40498  | 0.19 | C_unshiu_01436 | 43771  | 3274   | 40498  | 59.6  | 100   |
| chr4 | 1382862 | 1383922 | 1061   | 0.01 | C_unshiu_00035 | 346374 | 347434 | 1061   | 0.15  | 98.68 |
| chr4 | 1387652 | 1438997 | 51346  | 0.25 | C_unshiu_00202 | 176351 | 227694 | 51344  | 15.32 | 99.98 |
| chr4 | 1439063 | 1455191 | 16129  | 0.08 | C_unshiu_00202 | 227902 | 244020 | 16119  | 4.81  | 99.76 |
| chr4 | 1458907 | 1461771 | 2865   | 0.01 | C_unshiu_00202 | 250242 | 253126 | 2885   | 0.86  | 98.17 |
| chr4 | 1461882 | 1486617 | 24736  | 0.12 | C_unshiu_00202 | 253289 | 278045 | 24757  | 7.39  | 99.79 |
| chr4 | 1487505 | 1535730 | 48226  | 0.23 | C_unshiu_00202 | 279447 | 327670 | 48224  | 14.39 | 99.95 |
| chr4 | 1537562 | 1562083 | 24522  | 0.12 | C_unshiu_00012 | 187    | 24708  | 24522  | 2.61  | 99.91 |
| chr4 | 1562049 | 1735108 | 173060 | 0.83 | C_unshiu_00012 | 24768  | 197848 | 173081 | 18.45 | 99.94 |
| chr4 | 1735334 | 1779670 | 44337  | 0.21 | C_unshiu_00012 | 198003 | 242415 | 44413  | 4.73  | 99.71 |
| chr4 | 1779174 | 1789082 | 9909   | 0.05 | C_unshiu_00012 | 246845 | 256753 | 9909   | 1.06  | 99.99 |
| chr4 | 1791350 | 1990706 | 199357 | 0.95 | C_unshiu_00012 | 258170 | 457545 | 199376 | 21.25 | 99.89 |
| chr4 | 1990624 | 2034515 | 43892  | 0.21 | C_unshiu_00012 | 457504 | 501401 | 43898  | 4.68  | 99.96 |
| chr4 | 2032570 | 2055426 | 22857  | 0.11 | C_unshiu_00012 | 501407 | 524276 | 22870  | 2.44  | 99.94 |
| chr4 | 2035448 | 2159160 | 123713 | 0.59 | C_unshiu_00012 | 504285 | 628000 | 123716 | 13.18 | 99.89 |
| chr4 | 2159140 | 2206911 | 47772  | 0.23 | C_unshiu_00012 | 628031 | 675801 | 47771  | 5.09  | 99.99 |
| chr4 | 2206745 | 2231066 | 24322  | 0.12 | C_unshiu_00012 | 675803 | 700134 | 24332  | 2.59  | 99.83 |
| chr4 | 2211073 | 2257363 | 46291  | 0.22 | C_unshiu_00012 | 680131 | 726427 | 46297  | 4.93  | 99.9  |
| chr4 | 2261532 | 2273744 | 12213  | 0.06 | C_unshiu_00012 | 730090 | 742306 | 12217  | 1.3   | 99.97 |
| chr4 | 2273745 | 2279021 | 5277   | 0.03 | C_unshiu_00012 | 742680 | 747957 | 5278   | 0.56  | 99.98 |
| chr4 | 2279026 | 2334515 | 55490  | 0.27 | C_unshiu_00012 | 748804 | 804266 | 55463  | 5.91  | 99.8  |
| chr4 | 2314514 | 2384762 | 70249  | 0.34 | C_unshiu_00012 | 784272 | 854491 | 70220  | 7.48  | 99.94 |
| chr4 | 2384958 | 2390900 | 5943   | 0.03 | C_unshiu_00012 | 855368 | 861310 | 5943   | 0.63  | 100   |
| chr4 | 2390960 | 2397585 | 6626   | 0.03 | C_unshiu_00012 | 861672 | 868293 | 6622   | 0.71  | 99.92 |
| chr4 | 2397396 | 2439487 | 42092  | 0.2  | C_unshiu_00012 | 868866 | 910957 | 42092  | 4.49  | 99.98 |
| chr4 | 2438934 | 2451114 | 12181  | 0.06 | C_unshiu_00012 | 912398 | 924583 | 12186  | 1.3   | 99.89 |
| chr4 | 2463515 | 2465274 | 1760   | 0.01 | C_unshiu_00058 | 301880 | 300126 | 1755   | 0.3   | 99.26 |
| chr4 | 2463630 | 2490477 | 26848  | 0.13 | C_unshiu_00058 | 301879 | 328766 | 26888  | 4.55  | 99.7  |
| chr4 | 2470463 | 2590674 | 120212 | 0.57 | C_unshiu_00058 | 308725 | 428954 | 120230 | 20.36 | 99.95 |
| chr4 | 2594723 | 2644484 | 49762  | 0.24 | C_unshiu_00058 | 433007 | 482751 | 49745  | 8.42  | 99.93 |
| chr4 | 2645247 | 2751091 | 105845 | 0.51 | C_unshiu_00058 | 483829 | 589629 | 105801 | 17.92 | 99.84 |
| chr4 | 2772308 | 2778753 | 6446   | 0.03 | C_unshiu_01756 | 6493   | 26     | 6468   | 12.88 | 99.66 |
| chr4 | 2798012 | 2800359 | 2348   | 0.01 | C_unshiu_01756 | 32091  | 34465  | 2375   | 4.73  | 98.28 |
| chr4 | 2811039 | 2818707 | 7669   | 0.04 | C_unshiu_01756 | 36139  | 43794  | 7656   | 15.24 | 99.32 |
| chr4 | 2837193 | 2840933 | 3741   | 0.02 | C_unshiu_01286 | 47048  | 50782  | 3735   | 4.77  | 99.81 |
| chr4 | 2845858 | 2854633 | 8776   | 0.04 | C_unshiu_00323 | 74168  | 82945  | 8778   | 3.44  | 99.64 |
| chr4 | 2875297 | 2879194 | 3898   | 0.02 | C_unshiu_00323 | 103608 | 107538 | 3931   | 1.54  | 98.73 |
| chr4 | 2899627 | 2902258 | 2632   | 0.01 | C_unshiu_01596 | 31985  | 29335  | 2651   | 4.6   | 98.23 |
| chr4 | 2900794 | 2906642 | 5849   | 0.03 | C_unshiu_01138 | 1      | 5850   | 5850   | 6.35  | 99.3  |
| chr4 | 2913554 | 2915156 | 1603   | 0.01 | C_unshiu_01138 | 12992  | 14594  | 1603   | 1.74  | 98.19 |
| chr4 | 2916065 | 2920082 | 4018   | 0.02 | C_unshiu_01138 | 15701  | 19709  | 4009   | 4.35  | 98.95 |
| chr4 | 2916863 | 2922853 | 5991   | 0.03 | C_unshiu_01596 | 15400  | 9406   | 5995   | 10.4  | 98.37 |
| chr4 | 2924672 | 2928058 | 3387   | 0.02 | C_unshiu_01138 | 24126  | 27516  | 3391   | 3.68  | 99.73 |
| chr4 | 2928059 | 2929402 | 1344   | 0.01 | C_unshiu_01441 | 54173  | 55516  | 1344   | 1.99  | 100   |
| chr4 | 2940890 | 2942870 | 1981   | 0.01 | C_unshiu_01596 | 1982   | 1      | 1982   | 3.44  | 99.9  |
| chr4 | 2945676 | 2952249 | 6574   | 0.03 | C_unshiu_00645 | 127495 | 134049 | 6555   | 4.15  | 99.7  |
| chr4 | 2956387 | 2961943 | 5557   | 0.03 | C_unshiu_00645 | 134759 | 140312 | 5554   | 3.51  | 99.28 |
| chr4 | 2958264 | 2963131 | 4868   | 0.02 | C_unshiu_02442 | 26377  | 21510  | 4868   | 18.46 | 99.45 |
| chr4 | 2979478 | 2982322 | 2845   | 0.01 | C_unshiu_02442 | 10496  | 7653   | 2844   | 10.78 | 99.79 |
| chr4 | 2983706 | 2990264 | 6559   | 0.03 | C_unshiu_00106 | 65073  | 58484  | 6590   | 1.46  | 98.62 |
| chr4 | 2999692 | 3012502 | 12811  | 0.06 | C_unshiu_01775 | 10805  | 23598  | 12794  | 25.86 | 98.91 |
| chr4 | 3032571 | 3033644 | 1074   | 0.01 | C_unshiu_00506 | 137630 | 138703 | 1074   | 0.57  | 99.91 |
| chr4 | 3033656 | 3042292 | 8637   | 0.04 | C_unshiu_00506 | 137635 | 129030 | 8606   | 4.54  | 98.02 |
| chr4 | 3044261 | 3054250 | 9990   | 0.05 | C_unshiu_01414 | 35677  | 45701  | 10025  | 14.33 | 98.45 |
| chr4 | 3054259 | 3057680 | 3422   | 0.02 | C_unshiu_00506 | 115870 | 112449 | 3422   | 1.8   | 100   |
| chr4 | 3057700 | 3060946 | 3247   | 0.02 | C_unshiu_01414 | 48940  | 52187  | 3248   | 4.64  | 98.56 |
| chr4 | 3061691 | 3063971 | 2281   | 0.01 | C_unshiu_01414 | 52364  | 54648  | 2285   | 3.27  | 98.6  |
| chr4 | 3072195 | 3078154 | 5960   | 0.03 | C_unshiu_00506 | 106849 | 100871 | 5979   | 3.15  | 98.95 |
| chr4 | 3095799 | 3103823 | 8025   | 0.04 | C_unshiu_00506 | 99653  | 91629  | 8025   | 4.23  | 99.86 |
| chr4 | 3108459 | 3128125 | 19667  | 0.09 | C_unshiu_00506 | 87694  | 67999  | 19696  | 10.38 | 99.38 |
| chr4 | 3127994 | 3238108 | 110115 | 0.53 | C_unshiu_00920 | 110085 | 14     | 110072 | 95.92 | 99.54 |
| chr4 | 3238067 | 3244022 | 5956   | 0.03 | C_unshiu_00013 | 1      | 5951   | 5951   | 0.64  | 99.03 |
| chr4 | 3245387 | 3252609 | 7223   | 0.03 | C_unshiu_00506 | 61454  | 54232  | 7223   | 3.81  | 99.89 |
| chr4 | 3252858 | 3261396 | 8539   | 0.04 | C_unshiu_00013 | 11376  | 19927  | 8552   | 0.92  | 98.17 |
| chr4 | 3264568 | 3266480 | 1913   | 0.01 | C_unshiu_00506 | 46098  | 44185  | 1914   | 1.01  | 99.43 |
| chr4 | 3275798 | 3281011 | 5214   | 0.02 | C_unshiu_00506 | 36086  | 30849  | 5238   | 2.76  | 98.15 |
| chr4 | 3287290 | 3297160 | 9871   | 0.05 | C_unshiu_00506 | 24334  | 14464  | 9871   | 5.2   | 99.93 |
| chr4 | 3297257 | 3318799 | 21543  | 0.1  | C_unshiu_01855 | 34156  | 12644  | 21513  | 46.47 | 98.11 |
| chr4 | 3308553 | 3359038 | 50486  | 0.24 | C_unshiu_01039 | 59089  | 8583   | 50507  | 49.5  | 99.1  |
| chr4 | 3359854 | 3362420 | 2567   | 0.01 | C_unshiu_01039 | 7254   | 4694   | 2561   | 2.51  | 99.73 |
| chr4 | 3371773 | 3380938 | 9166   | 0.04 | C_unshiu_00309 | 156032 | 146840 | 9193   | 3.53  | 98.16 |
| chr4 | 3384481 | 3386099 | 1619   | 0.01 | C_unshiu_00629 | 160905 | 159295 | 1611   | 1     | 98.64 |
| chr4 | 3386976 | 3388854 | 1879   | 0.01 | C_unshiu_00629 | 158262 | 156395 | 1868   | 1.16  | 98.51 |

|      |         |         |        |      |                |        |        |        |       |       |
|------|---------|---------|--------|------|----------------|--------|--------|--------|-------|-------|
| chr4 | 3399920 | 3406168 | 6249   | 0.03 | C_unshiu_00629 | 144285 | 138047 | 6239   | 3.88  | 99.63 |
| chr4 | 3406505 | 3409288 | 2784   | 0.01 | C_unshiu_00629 | 137042 | 134252 | 2791   | 1.73  | 99.07 |
| chr4 | 3409763 | 3421527 | 11765  | 0.06 | C_unshiu_00629 | 133266 | 121499 | 11768  | 7.31  | 98.48 |
| chr4 | 3426229 | 3428442 | 2214   | 0.01 | C_unshiu_00629 | 117463 | 115245 | 2219   | 1.38  | 98.92 |
| chr4 | 3428442 | 3446486 | 18045  | 0.09 | C_unshiu_00629 | 113527 | 95481  | 18047  | 11.22 | 99.28 |
| chr4 | 3446982 | 3451146 | 4165   | 0.02 | C_unshiu_00424 | 181156 | 176992 | 4165   | 1.92  | 99.54 |
| chr4 | 3452457 | 3461470 | 9014   | 0.04 | C_unshiu_00629 | 90574  | 81562  | 9013   | 5.6   | 99.29 |
| chr4 | 3491826 | 3505430 | 13605  | 0.06 | C_unshiu_02379 | 367    | 13967  | 13601  | 49.08 | 99.67 |
| chr4 | 3503538 | 3516021 | 12484  | 0.06 | C_unshiu_00424 | 148212 | 135702 | 12511  | 5.76  | 98.89 |
| chr4 | 3516029 | 3536061 | 20033  | 0.1  | C_unshiu_00424 | 135411 | 115325 | 20087  | 9.24  | 98.51 |
| chr4 | 3536630 | 3543336 | 6707   | 0.03 | C_unshiu_00424 | 108017 | 101323 | 6695   | 3.08  | 98.73 |
| chr4 | 3583053 | 3591641 | 8589   | 0.04 | C_unshiu_00424 | 83835  | 75237  | 8599   | 3.96  | 99.22 |
| chr4 | 3594616 | 3598433 | 3818   | 0.02 | C_unshiu_02255 | 6607   | 10456  | 3850   | 12.22 | 98.29 |
| chr4 | 3598919 | 3600640 | 1722   | 0.01 | C_unshiu_02255 | 11413  | 13134  | 1722   | 5.47  | 99.01 |
| chr4 | 3599207 | 3626584 | 27378  | 0.13 | C_unshiu_00424 | 75241  | 47867  | 27375  | 12.6  | 99.76 |
| chr4 | 3626594 | 3639988 | 13395  | 0.06 | C_unshiu_00424 | 47579  | 34181  | 13399  | 6.16  | 99.43 |
| chr4 | 3638317 | 3641856 | 3540   | 0.02 | C_unshiu_02255 | 27960  | 31499  | 3540   | 11.24 | 98.45 |
| chr4 | 3643671 | 3652176 | 8506   | 0.04 | C_unshiu_01930 | 43631  | 35116  | 8516   | 19.52 | 99.45 |
| chr4 | 3652172 | 3663320 | 11149  | 0.05 | C_unshiu_01930 | 35029  | 23865  | 11165  | 25.59 | 99.28 |
| chr4 | 3664087 | 3667286 | 3200   | 0.02 | C_unshiu_01930 | 22574  | 19344  | 3231   | 7.41  | 98.24 |
| chr4 | 3673269 | 3676877 | 3609   | 0.02 | C_unshiu_00424 | 12128  | 8520   | 3609   | 1.66  | 100   |
| chr4 | 3677577 | 3678598 | 1022   | 0    | C_unshiu_00102 | 377066 | 376045 | 1022   | 0.22  | 100   |
| chr4 | 3678882 | 3681334 | 2453   | 0.01 | C_unshiu_00424 | 7775   | 5323   | 2453   | 1.13  | 100   |
| chr4 | 3694137 | 3695300 | 1164   | 0.01 | C_unshiu_00107 | 256973 | 255807 | 1167   | 0.26  | 98.71 |
| chr4 | 3696154 | 3697756 | 1603   | 0.01 | C_unshiu_00107 | 254811 | 253208 | 1604   | 0.36  | 99    |
| chr4 | 3701898 | 3703661 | 1764   | 0.01 | C_unshiu_02920 | 4430   | 6193   | 1764   | 11.53 | 99.6  |
| chr4 | 3733545 | 3737391 | 3847   | 0.02 | C_unshiu_01782 | 29300  | 33147  | 3848   | 7.82  | 99.53 |
| chr4 | 3741800 | 3745254 | 3455   | 0.02 | C_unshiu_01782 | 33840  | 37295  | 3456   | 7.02  | 98.99 |
| chr4 | 3744175 | 3745434 | 1260   | 0.01 | C_unshiu_02850 | 6236   | 4977   | 1260   | 7.55  | 99.29 |
| chr4 | 3753850 | 3755400 | 1551   | 0.01 | C_unshiu_02850 | 15137  | 16687  | 1551   | 9.29  | 99.81 |
| chr4 | 3760212 | 3774408 | 14197  | 0.07 | C_unshiu_00381 | 106427 | 92254  | 14174  | 6.19  | 98.22 |
| chr4 | 3774957 | 3784379 | 9423   | 0.05 | C_unshiu_00381 | 92260  | 82772  | 9489   | 4.14  | 98.59 |
| chr4 | 3807293 | 3834056 | 26764  | 0.13 | C_unshiu_01389 | 43746  | 70514  | 26769  | 37.63 | 99.66 |
| chr4 | 3868491 | 3880262 | 11772  | 0.06 | C_unshiu_01431 | 1      | 11781  | 11781  | 17.26 | 99.16 |
| chr4 | 3880525 | 3917783 | 37259  | 0.18 | C_unshiu_00439 | 100988 | 63710  | 37279  | 17.59 | 99.93 |
| chr4 | 3927780 | 3990098 | 62319  | 0.3  | C_unshiu_00439 | 64041  | 1666   | 62376  | 29.43 | 99.88 |
| chr4 | 4010380 | 4110876 | 100497 | 0.48 | C_unshiu_00979 | 103695 | 3237   | 100459 | 92.42 | 99.87 |
| chr4 | 4110877 | 4114110 | 3234   | 0.02 | C_unshiu_00979 | 1      | 3235   | 3235   | 2.98  | 99.97 |
| chr4 | 4128037 | 4136025 | 7989   | 0.04 | C_unshiu_00299 | 243972 | 235957 | 8016   | 3.01  | 99.14 |
| chr4 | 4133054 | 4145947 | 12894  | 0.06 | C_unshiu_00299 | 225026 | 212133 | 12894  | 4.84  | 99.98 |
| chr4 | 4145864 | 4180866 | 35003  | 0.17 | C_unshiu_00299 | 212132 | 177128 | 35005  | 13.14 | 99.99 |
| chr4 | 4180920 | 4203321 | 22402  | 0.11 | C_unshiu_00299 | 177210 | 154823 | 22388  | 8.41  | 99.94 |
| chr4 | 4183325 | 4242630 | 59306  | 0.28 | C_unshiu_00299 | 174805 | 115504 | 59302  | 22.27 | 99.91 |
| chr4 | 4222654 | 4248368 | 25715  | 0.12 | C_unshiu_00299 | 135495 | 109766 | 25730  | 9.66  | 99.93 |
| chr4 | 4249550 | 4252929 | 3380   | 0.02 | C_unshiu_00299 | 108298 | 104912 | 3387   | 1.27  | 99.56 |
| chr4 | 4253807 | 4263814 | 10008  | 0.05 | C_unshiu_00299 | 104254 | 94239  | 10016  | 3.76  | 98.91 |
| chr4 | 4272811 | 4352445 | 79635  | 0.38 | C_unshiu_00299 | 95093  | 15322  | 79772  | 29.95 | 99.73 |
| chr4 | 4332459 | 4360230 | 27772  | 0.13 | C_unshiu_00299 | 35297  | 7532   | 27766  | 10.43 | 99.92 |
| chr4 | 4361195 | 4363323 | 2129   | 0.01 | C_unshiu_01756 | 36289  | 34153  | 2137   | 4.26  | 99.44 |
| chr4 | 4366018 | 4409083 | 43066  | 0.21 | C_unshiu_01865 | 2801   | 45881  | 43081  | 93.86 | 99.72 |
| chr4 | 4405875 | 4425163 | 19289  | 0.09 | C_unshiu_00179 | 53546  | 34258  | 19289  | 5.37  | 100   |
| chr4 | 4424980 | 4457684 | 32705  | 0.16 | C_unshiu_00179 | 34062  | 1322   | 32741  | 9.11  | 99.86 |
| chr4 | 4454104 | 4599234 | 145131 | 0.69 | C_unshiu_00368 | 19199  | 164284 | 145086 | 62.2  | 99.93 |
| chr4 | 4599234 | 4604998 | 5765   | 0.03 | C_unshiu_00368 | 164565 | 170361 | 5797   | 2.49  | 98.97 |
| chr4 | 4610085 | 4612026 | 1942   | 0.01 | C_unshiu_00832 | 121355 | 123296 | 1942   | 1.56  | 100   |
| chr4 | 4612027 | 4704267 | 92241  | 0.44 | C_unshiu_00832 | 121337 | 29117  | 92221  | 73.96 | 99.97 |
| chr4 | 4710060 | 4716199 | 6140   | 0.03 | C_unshiu_00832 | 23872  | 17732  | 6141   | 4.92  | 99.95 |
| chr4 | 4716197 | 4732509 | 16313  | 0.08 | C_unshiu_00832 | 17574  | 1271   | 16304  | 13.07 | 99.86 |
| chr4 | 4731967 | 4747029 | 15063  | 0.07 | C_unshiu_00342 | 9353   | 24415  | 15063  | 6.07  | 99.96 |
| chr4 | 4748752 | 4761539 | 12788  | 0.06 | C_unshiu_00342 | 25291  | 38066  | 12776  | 5.15  | 99.55 |
| chr4 | 4761870 | 4855473 | 93604  | 0.45 | C_unshiu_00342 | 37744  | 131324 | 93581  | 37.7  | 99.93 |
| chr4 | 4855410 | 4876521 | 21112  | 0.1  | C_unshiu_00342 | 131328 | 152439 | 21112  | 8.5   | 99.92 |
| chr4 | 4880015 | 4884941 | 4927   | 0.02 | C_unshiu_00342 | 153352 | 158278 | 4927   | 1.98  | 100   |
| chr4 | 4887486 | 4974862 | 87377  | 0.42 | C_unshiu_00342 | 160779 | 248229 | 87451  | 35.23 | 99.71 |
| chr4 | 5002599 | 5085776 | 83178  | 0.4  | C_unshiu_00465 | 119930 | 203123 | 83194  | 40.96 | 99.97 |
| chr4 | 5080770 | 5105235 | 24466  | 0.12 | C_unshiu_01651 | 4418   | 28890  | 24473  | 44.41 | 99.96 |
| chr4 | 5105005 | 5126558 | 21554  | 0.1  | C_unshiu_01651 | 33540  | 55093  | 21554  | 39.12 | 99.98 |
| chr4 | 5136625 | 5205813 | 69189  | 0.33 | C_unshiu_00022 | 617098 | 686288 | 69191  | 8.85  | 99.99 |
| chr4 | 5206686 | 5277547 | 70862  | 0.34 | C_unshiu_00022 | 687756 | 758673 | 70918  | 9.07  | 99.74 |
| chr4 | 5278379 | 5301088 | 22710  | 0.11 | C_unshiu_00022 | 759282 | 781999 | 22718  | 2.91  | 99.79 |
| chr4 | 5300678 | 5453300 | 152623 | 0.73 | C_unshiu_00236 | 304900 | 152363 | 152538 | 50.03 | 99.86 |
| chr4 | 5458405 | 5476591 | 18187  | 0.09 | C_unshiu_00236 | 147597 | 129392 | 18206  | 5.97  | 99.74 |
| chr4 | 5474693 | 5486008 | 11316  | 0.05 | C_unshiu_00146 | 256769 | 245456 | 11314  | 2.88  | 98.85 |
| chr4 | 5486089 | 5502227 | 16139  | 0.08 | C_unshiu_00146 | 245363 | 229176 | 16188  | 4.13  | 99.23 |
| chr4 | 5502250 | 5511468 | 9219   | 0.04 | C_unshiu_00146 | 228993 | 219785 | 9209   | 2.35  | 98.49 |
| chr4 | 5511858 | 5544388 | 32531  | 0.16 | C_unshiu_00146 | 219526 | 186911 | 32616  | 8.31  | 99.33 |
| chr4 | 5549855 | 5585001 | 35147  | 0.17 | C_unshiu_00146 | 181767 | 146636 | 35132  | 8.95  | 99.09 |
| chr4 | 5587165 | 5611772 | 24608  | 0.12 | C_unshiu_00146 | 143303 | 118588 | 24716  | 6.3   | 99.09 |
| chr4 | 5611794 | 5621480 | 9687   | 0.05 | C_unshiu_00146 | 118803 | 109130 | 9674   | 2.47  | 99.16 |

|      |         |         |       |      |                |        |        |       |       |       |
|------|---------|---------|-------|------|----------------|--------|--------|-------|-------|-------|
| chr4 | 5622034 | 5623314 | 1281  | 0.01 | C_unshiu_00146 | 108080 | 106801 | 1280  | 0.33  | 99.53 |
| chr4 | 5623303 | 5642227 | 18925 | 0.09 | C_unshiu_00146 | 102114 | 83243  | 18872 | 4.81  | 98.83 |
| chr4 | 5645937 | 5650123 | 4187  | 0.02 | C_unshiu_00146 | 80382  | 76196  | 4187  | 1.07  | 99.14 |
| chr4 | 5652215 | 5661146 | 8932  | 0.04 | C_unshiu_00146 | 76035  | 67097  | 8939  | 2.28  | 99.51 |
| chr4 | 5661298 | 5702061 | 40764 | 0.19 | C_unshiu_00146 | 67029  | 26153  | 40877 | 10.42 | 98.94 |
| chr4 | 5702700 | 5705066 | 2367  | 0.01 | C_unshiu_00959 | 64073  | 66441  | 2369  | 2.14  | 99.32 |
| chr4 | 5710465 | 5728171 | 17707 | 0.08 | C_unshiu_00959 | 70125  | 87801  | 17677 | 15.96 | 99.27 |
| chr4 | 5736945 | 5756606 | 19662 | 0.09 | C_unshiu_00013 | 46374  | 66035  | 19662 | 2.11  | 100   |
| chr4 | 5756652 | 5759576 | 2925  | 0.01 | C_unshiu_00013 | 65939  | 68859  | 2921  | 0.31  | 99.52 |
| chr4 | 5759888 | 5810531 | 50644 | 0.24 | C_unshiu_00013 | 69382  | 119974 | 50593 | 5.43  | 99.8  |
| chr4 | 5811091 | 5831765 | 20675 | 0.1  | C_unshiu_00013 | 120688 | 141370 | 20683 | 2.22  | 99.96 |
| chr4 | 5811775 | 5868805 | 57031 | 0.27 | C_unshiu_00013 | 121372 | 178337 | 56966 | 6.11  | 99.79 |
| chr4 | 5869187 | 5905337 | 36151 | 0.17 | C_unshiu_00013 | 179173 | 215304 | 36132 | 3.88  | 99.94 |
| chr4 | 5905333 | 5950095 | 44763 | 0.21 | C_unshiu_00013 | 215234 | 259993 | 44760 | 4.8   | 99.97 |
| chr4 | 5950848 | 5961015 | 10168 | 0.05 | C_unshiu_00013 | 262157 | 272324 | 10168 | 1.09  | 100   |
| chr4 | 5964474 | 5991490 | 27017 | 0.13 | C_unshiu_00013 | 277782 | 304805 | 27024 | 2.9   | 99.97 |
| chr4 | 5971435 | 6016584 | 45150 | 0.22 | C_unshiu_00013 | 284744 | 329879 | 45136 | 4.84  | 99.88 |
| chr4 | 6016739 | 6039698 | 22960 | 0.11 | C_unshiu_00013 | 330240 | 353202 | 22963 | 2.46  | 99.9  |
| chr4 | 6019689 | 6076529 | 56841 | 0.27 | C_unshiu_00013 | 333192 | 390002 | 56811 | 6.1   | 99.69 |
| chr4 | 6077136 | 6124457 | 47322 | 0.23 | C_unshiu_00013 | 391359 | 438686 | 47328 | 5.08  | 99.88 |
| chr4 | 6123989 | 6177294 | 53306 | 0.25 | C_unshiu_00013 | 438308 | 491621 | 53314 | 5.72  | 99.94 |
| chr4 | 6185395 | 6217834 | 32440 | 0.15 | C_unshiu_00013 | 500054 | 532753 | 32700 | 3.51  | 98.85 |
| chr4 | 6220261 | 6234420 | 14160 | 0.07 | C_unshiu_00013 | 532872 | 546945 | 14074 | 1.51  | 98.35 |
| chr4 | 6235164 | 6244218 | 9055  | 0.04 | C_unshiu_00013 | 548428 | 557482 | 9055  | 0.97  | 99.97 |
| chr4 | 6244237 | 6309638 | 65402 | 0.31 | C_unshiu_00013 | 557797 | 623233 | 65437 | 7.02  | 99.9  |
| chr4 | 6309681 | 6362709 | 53029 | 0.25 | C_unshiu_00013 | 623675 | 676709 | 53035 | 5.69  | 99.99 |
| chr4 | 6366134 | 6372592 | 6459  | 0.03 | C_unshiu_00013 | 684296 | 690798 | 6503  | 0.7   | 99.32 |
| chr4 | 6379538 | 6400389 | 20852 | 0.1  | C_unshiu_02649 | 50     | 20883  | 20834 | 99.77 | 98.86 |
| chr4 | 6393649 | 6403342 | 9694  | 0.05 | C_unshiu_00753 | 56802  | 66523  | 9722  | 7.17  | 98.81 |
| chr4 | 6412684 | 6414645 | 1962  | 0.01 | C_unshiu_00753 | 71995  | 73963  | 1969  | 1.45  | 98.98 |
| chr4 | 6415346 | 6417566 | 2221  | 0.01 | C_unshiu_00160 | 42507  | 40263  | 2245  | 0.6   | 98.26 |
| chr4 | 6418969 | 6420534 | 1566  | 0.01 | C_unshiu_00160 | 39545  | 37978  | 1568  | 0.42  | 98.03 |
| chr4 | 6420857 | 6422902 | 2046  | 0.01 | C_unshiu_00160 | 38387  | 36342  | 2046  | 0.55  | 100   |
| chr4 | 6423176 | 6429791 | 6616  | 0.03 | C_unshiu_00160 | 35049  | 28424  | 6626  | 1.78  | 98.66 |
| chr4 | 6434532 | 6439141 | 4610  | 0.02 | C_unshiu_00160 | 24130  | 19453  | 4678  | 1.26  | 98.14 |
| chr4 | 6440992 | 6442222 | 1231  | 0.01 | C_unshiu_00160 | 19186  | 17954  | 1233  | 0.33  | 98.7  |
| chr4 | 6444700 | 6445878 | 1179  | 0.01 | C_unshiu_00358 | 123558 | 122380 | 1179  | 0.5   | 100   |
| chr4 | 6455649 | 6466072 | 10424 | 0.05 | C_unshiu_00020 | 635299 | 624885 | 10415 | 1.33  | 99.29 |
| chr4 | 6496663 | 6498021 | 1359  | 0.01 | C_unshiu_02897 | 15762  | 14404  | 1359  | 8.62  | 99.85 |
| chr4 | 6498021 | 6502240 | 4220  | 0.02 | C_unshiu_02897 | 13253  | 9034   | 4220  | 26.77 | 100   |
| chr4 | 6503347 | 6513757 | 10411 | 0.05 | C_unshiu_00020 | 590760 | 580332 | 10429 | 1.33  | 98.95 |
| chr4 | 6514892 | 6521645 | 6754  | 0.03 | C_unshiu_00020 | 580337 | 573595 | 6743  | 0.86  | 98.85 |
| chr4 | 6554174 | 6557929 | 3756  | 0.02 | C_unshiu_01108 | 51040  | 47285  | 3756  | 3.94  | 100   |
| chr4 | 6582805 | 6588577 | 5773  | 0.03 | C_unshiu_00771 | 63595  | 69376  | 5782  | 4.36  | 98.89 |
| chr4 | 6588797 | 6590850 | 2054  | 0.01 | C_unshiu_00771 | 69616  | 71671  | 2056  | 1.55  | 98.59 |
| chr4 | 6595327 | 6599117 | 3791  | 0.02 | C_unshiu_00771 | 72101  | 75881  | 3781  | 2.85  | 98.35 |
| chr4 | 6599949 | 6602751 | 2803  | 0.01 | C_unshiu_00771 | 73695  | 76497  | 2803  | 2.11  | 99    |
| chr4 | 6627936 | 6629247 | 1312  | 0.01 | C_unshiu_01776 | 48815  | 47498  | 1318  | 2.67  | 98.79 |
| chr4 | 6641439 | 6651589 | 10151 | 0.05 | C_unshiu_00298 | 184947 | 174793 | 10155 | 3.81  | 98.11 |
| chr4 | 6659527 | 6666409 | 6883  | 0.03 | C_unshiu_01277 | 79051  | 72169  | 6883  | 8.71  | 100   |
| chr4 | 6674104 | 6688308 | 14205 | 0.07 | C_unshiu_01277 | 63613  | 49397  | 14217 | 17.98 | 99.23 |
| chr4 | 6693466 | 6697164 | 3699  | 0.02 | C_unshiu_01277 | 44823  | 41125  | 3699  | 4.68  | 100   |
| chr4 | 6701666 | 6702878 | 1213  | 0.01 | C_unshiu_00032 | 549263 | 550477 | 1215  | 0.17  | 99.26 |
| chr4 | 6705712 | 6707008 | 1297  | 0.01 | C_unshiu_00032 | 543178 | 544471 | 1294  | 0.18  | 99.07 |
| chr4 | 6710448 | 6727320 | 16873 | 0.08 | C_unshiu_00102 | 47389  | 64280  | 16892 | 3.72  | 99.4  |
| chr4 | 6727338 | 6752491 | 25154 | 0.12 | C_unshiu_00102 | 64852  | 89867  | 25016 | 5.5   | 98.48 |
| chr4 | 6753462 | 6759322 | 5861  | 0.03 | C_unshiu_00102 | 94023  | 99838  | 5816  | 1.28  | 98.54 |
| chr4 | 6759185 | 6765282 | 6098  | 0.03 | C_unshiu_00102 | 99607  | 105697 | 6091  | 1.34  | 99.43 |
| chr4 | 6767365 | 6774484 | 7120  | 0.03 | C_unshiu_00102 | 105711 | 112842 | 7132  | 1.57  | 99.54 |
| chr4 | 6774483 | 6812371 | 37889 | 0.18 | C_unshiu_00102 | 113487 | 151378 | 37892 | 8.34  | 99.53 |
| chr4 | 6814683 | 6834682 | 20000 | 0.1  | C_unshiu_00102 | 152329 | 172317 | 19989 | 4.4   | 99.56 |
| chr4 | 6837178 | 6838437 | 1260  | 0.01 | C_unshiu_00178 | 140266 | 141525 | 1260  | 0.35  | 100   |
| chr4 | 6842854 | 6853190 | 10337 | 0.05 | C_unshiu_00102 | 178496 | 188833 | 10338 | 2.27  | 99.67 |
| chr4 | 6853191 | 6857551 | 4361  | 0.02 | C_unshiu_00029 | 632128 | 627768 | 4361  | 0.61  | 100   |
| chr4 | 6857544 | 6860957 | 3414  | 0.02 | C_unshiu_00102 | 192554 | 195979 | 3426  | 0.75  | 99.21 |
| chr4 | 6861321 | 6887319 | 25999 | 0.12 | C_unshiu_00102 | 194947 | 220938 | 25992 | 5.72  | 99.68 |
| chr4 | 6887311 | 6898073 | 10763 | 0.05 | C_unshiu_00102 | 221141 | 231914 | 10774 | 2.37  | 99.68 |
| chr4 | 6897876 | 6899159 | 1284  | 0.01 | C_unshiu_00102 | 231762 | 233045 | 1284  | 0.28  | 99.38 |
| chr4 | 6899183 | 6901260 | 2078  | 0.01 | C_unshiu_00102 | 234018 | 236097 | 2080  | 0.46  | 99.71 |
| chr4 | 6902729 | 6933135 | 30407 | 0.15 | C_unshiu_00102 | 237337 | 267707 | 30371 | 6.68  | 99.44 |
| chr4 | 6936178 | 6938943 | 2766  | 0.01 | C_unshiu_00102 | 272577 | 275330 | 2754  | 0.61  | 98.09 |
| chr4 | 6939541 | 6957282 | 17742 | 0.08 | C_unshiu_00102 | 275388 | 293143 | 17756 | 3.91  | 99.64 |
| chr4 | 6956834 | 6964027 | 7194  | 0.03 | C_unshiu_00102 | 295251 | 302439 | 7189  | 1.58  | 99.65 |
| chr4 | 6966810 | 6967976 | 1167  | 0.01 | C_unshiu_00221 | 285071 | 283905 | 1167  | 0.37  | 100   |
| chr4 | 6968342 | 6978743 | 10402 | 0.05 | C_unshiu_00102 | 305897 | 316301 | 10405 | 2.29  | 99.64 |
| chr4 | 6979369 | 6980983 | 1615  | 0.01 | C_unshiu_00102 | 317216 | 318829 | 1614  | 0.36  | 99.75 |
| chr4 | 6981075 | 6999270 | 18196 | 0.09 | C_unshiu_00102 | 318935 | 337247 | 18313 | 4.03  | 98.92 |
| chr4 | 7000158 | 7007227 | 7070  | 0.03 | C_unshiu_00102 | 338493 | 345611 | 7119  | 1.57  | 98.4  |
| chr4 | 7009428 | 7016997 | 7570  | 0.04 | C_unshiu_00102 | 347197 | 354770 | 7574  | 1.67  | 99.74 |

|      |         |         |        |      |                |        |        |        |       |       |
|------|---------|---------|--------|------|----------------|--------|--------|--------|-------|-------|
| chr4 | 7016990 | 7026391 | 9402   | 0.04 | C_unshiu_00102 | 354894 | 364286 | 9393   | 2.07  | 99.44 |
| chr4 | 7026389 | 7031235 | 4847   | 0.02 | C_unshiu_00102 | 364529 | 369380 | 4852   | 1.07  | 98.41 |
| chr4 | 7061718 | 7078484 | 16767  | 0.08 | C_unshiu_00178 | 8605   | 25389  | 16785  | 4.66  | 99.65 |
| chr4 | 7078840 | 7112334 | 33495  | 0.16 | C_unshiu_00178 | 25502  | 59095  | 33594  | 9.33  | 99.31 |
| chr4 | 7112414 | 7117259 | 4846   | 0.02 | C_unshiu_00178 | 59197  | 64057  | 4861   | 1.35  | 99.51 |
| chr4 | 7117324 | 7122943 | 5620   | 0.03 | C_unshiu_00178 | 64055  | 69669  | 5615   | 1.56  | 99.48 |
| chr4 | 7123253 | 7134271 | 11019  | 0.05 | C_unshiu_00178 | 69936  | 80981  | 11046  | 3.07  | 99.19 |
| chr4 | 7142344 | 7146227 | 3884   | 0.02 | C_unshiu_00178 | 89271  | 93137  | 3867   | 1.07  | 98.54 |
| chr4 | 7145833 | 7150921 | 5089   | 0.02 | C_unshiu_01358 | 1      | 5108   | 5108   | 6.94  | 99.18 |
| chr4 | 7150929 | 7157012 | 6084   | 0.03 | C_unshiu_01358 | 5936   | 12016  | 6081   | 8.26  | 99.59 |
| chr4 | 7166632 | 7175966 | 9335   | 0.04 | C_unshiu_00178 | 118832 | 128172 | 9341   | 2.59  | 99.55 |
| chr4 | 7174593 | 7196210 | 21618  | 0.1  | C_unshiu_01358 | 13884  | 35528  | 21645  | 29.39 | 98.76 |
| chr4 | 7196335 | 7205331 | 8997   | 0.04 | C_unshiu_01358 | 35864  | 44900  | 9037   | 12.27 | 99.08 |
| chr4 | 7205317 | 7217289 | 11973  | 0.06 | C_unshiu_01358 | 45226  | 57150  | 11925  | 16.19 | 98.49 |
| chr4 | 7220541 | 7221669 | 1129   | 0.01 | C_unshiu_01358 | 63299  | 64422  | 1124   | 1.53  | 98.06 |
| chr4 | 7246081 | 7247799 | 1719   | 0.01 | C_unshiu_00034 | 672056 | 670336 | 1721   | 0.25  | 99.42 |
| chr4 | 7247801 | 7260166 | 12366  | 0.06 | C_unshiu_00034 | 670144 | 657704 | 12441  | 1.78  | 98.82 |
| chr4 | 7284678 | 7289849 | 5172   | 0.02 | C_unshiu_03121 | 1      | 5190   | 5190   | 61.66 | 98.71 |
| chr4 | 7290033 | 7292456 | 2424   | 0.01 | C_unshiu_03121 | 5994   | 8417   | 2424   | 28.8  | 100   |
| chr4 | 7319221 | 7325545 | 6325   | 0.03 | C_unshiu_00034 | 597802 | 591463 | 6340   | 0.91  | 98.44 |
| chr4 | 7325571 | 7341930 | 16360  | 0.08 | C_unshiu_00034 | 590999 | 574626 | 16374  | 2.34  | 99.71 |
| chr4 | 7341928 | 7351788 | 9861   | 0.05 | C_unshiu_00034 | 574589 | 564709 | 9881   | 1.41  | 99.19 |
| chr4 | 7351809 | 7368074 | 16266  | 0.08 | C_unshiu_00034 | 564584 | 548321 | 16264  | 2.32  | 99.42 |
| chr4 | 7370963 | 7373440 | 2478   | 0.01 | C_unshiu_00034 | 543749 | 541270 | 2480   | 0.35  | 99.15 |
| chr4 | 7373425 | 7385962 | 12538  | 0.06 | C_unshiu_00034 | 541245 | 528700 | 12546  | 1.79  | 99.7  |
| chr4 | 7386131 | 7410498 | 24368  | 0.12 | C_unshiu_00034 | 528255 | 503809 | 24447  | 3.49  | 98.8  |
| chr4 | 7425306 | 7428912 | 3607   | 0.02 | C_unshiu_00034 | 491117 | 487511 | 3607   | 0.52  | 99.39 |
| chr4 | 7431506 | 7435024 | 3519   | 0.02 | C_unshiu_00034 | 486239 | 482719 | 3521   | 0.5   | 99.49 |
| chr4 | 7435384 | 7437467 | 2084   | 0.01 | C_unshiu_00034 | 482719 | 480623 | 2097   | 0.3   | 98.71 |
| chr4 | 7437595 | 7457923 | 20329  | 0.1  | C_unshiu_00034 | 480082 | 459761 | 20322  | 2.9   | 99.36 |
| chr4 | 7458059 | 7472265 | 14207  | 0.07 | C_unshiu_00034 | 459764 | 445567 | 14198  | 2.03  | 99.28 |
| chr4 | 7472259 | 7479693 | 7435   | 0.04 | C_unshiu_00034 | 445216 | 437774 | 7443   | 1.06  | 99.69 |
| chr4 | 7480298 | 7514060 | 33763  | 0.16 | C_unshiu_00034 | 437376 | 403552 | 33825  | 4.83  | 98.78 |
| chr4 | 7514590 | 7550126 | 35537  | 0.17 | C_unshiu_00034 | 401513 | 365907 | 35607  | 5.09  | 99.04 |
| chr4 | 7550898 | 7555760 | 4863   | 0.02 | C_unshiu_00034 | 364686 | 359816 | 4871   | 0.7   | 99.51 |
| chr4 | 7556426 | 7561530 | 5105   | 0.02 | C_unshiu_00034 | 358623 | 353511 | 5113   | 0.73  | 99.57 |
| chr4 | 7561566 | 7583471 | 21906  | 0.1  | C_unshiu_00034 | 353515 | 331630 | 21886  | 3.13  | 99.6  |
| chr4 | 7584744 | 7597582 | 12839  | 0.06 | C_unshiu_00034 | 330543 | 317733 | 12811  | 1.83  | 98.66 |
| chr4 | 7604152 | 7610652 | 6501   | 0.03 | C_unshiu_00034 | 312825 | 306325 | 6501   | 0.93  | 99.37 |
| chr4 | 7613438 | 7615597 | 2160   | 0.01 | C_unshiu_00932 | 111293 | 113452 | 2160   | 1.9   | 100   |
| chr4 | 7615590 | 7622240 | 6651   | 0.03 | C_unshiu_00932 | 111292 | 104643 | 6650   | 5.86  | 99.98 |
| chr4 | 7622294 | 7639248 | 16955  | 0.08 | C_unshiu_00932 | 104283 | 87259  | 17025  | 15.01 | 98.62 |
| chr4 | 7640335 | 7656191 | 15857  | 0.08 | C_unshiu_00932 | 88376  | 72498  | 15879  | 14    | 99.81 |
| chr4 | 7656736 | 7657972 | 1237   | 0.01 | C_unshiu_01399 | 13696  | 14932  | 1237   | 1.76  | 100   |
| chr4 | 7662343 | 7704918 | 42576  | 0.2  | C_unshiu_00932 | 67047  | 24465  | 42583  | 37.53 | 99.98 |
| chr4 | 7684889 | 7714818 | 29930  | 0.14 | C_unshiu_00932 | 44500  | 14565  | 29936  | 26.39 | 99.98 |
| chr4 | 7714894 | 7719362 | 4469   | 0.02 | C_unshiu_00932 | 14214  | 9746   | 4469   | 3.94  | 100   |
| chr4 | 7726743 | 7728585 | 1843   | 0.01 | C_unshiu_00777 | 117849 | 116003 | 1847   | 1.4   | 98.21 |
| chr4 | 7728599 | 7730348 | 1750   | 0.01 | C_unshiu_00777 | 115827 | 114078 | 1750   | 1.33  | 99.03 |
| chr4 | 7730374 | 7731632 | 1259   | 0.01 | C_unshiu_00219 | 79449  | 78191  | 1259   | 0.4   | 100   |
| chr4 | 7730383 | 7731639 | 1257   | 0.01 | C_unshiu_00634 | 94292  | 93036  | 1257   | 0.79  | 100   |
| chr4 | 7732284 | 7733489 | 1206   | 0.01 | C_unshiu_00777 | 112240 | 111035 | 1206   | 0.92  | 99.59 |
| chr4 | 7735158 | 7737841 | 2684   | 0.01 | C_unshiu_02303 | 6333   | 9016   | 2684   | 9.01  | 99.74 |
| chr4 | 7738417 | 7763236 | 24820  | 0.12 | C_unshiu_00777 | 108151 | 83333  | 24819  | 18.88 | 99.94 |
| chr4 | 7763166 | 7783191 | 20026  | 0.1  | C_unshiu_00777 | 83083  | 63043  | 20041  | 15.24 | 99.66 |
| chr4 | 7783195 | 7785210 | 2016   | 0.01 | C_unshiu_00777 | 62638  | 60622  | 2017   | 1.53  | 99.9  |
| chr4 | 7792339 | 7795508 | 3170   | 0.02 | C_unshiu_00777 | 53441  | 50271  | 3171   | 2.41  | 99.81 |
| chr4 | 7795609 | 7806721 | 11113  | 0.05 | C_unshiu_00030 | 484973 | 473862 | 11112  | 1.57  | 99.87 |
| chr4 | 7806739 | 7821483 | 14745  | 0.07 | C_unshiu_00030 | 473960 | 459205 | 14756  | 2.08  | 99.85 |
| chr4 | 7822717 | 7827235 | 4519   | 0.02 | C_unshiu_00030 | 458332 | 453814 | 4519   | 0.64  | 99.98 |
| chr4 | 7827853 | 7831897 | 4045   | 0.02 | C_unshiu_00030 | 452506 | 448465 | 4042   | 0.57  | 99.93 |
| chr4 | 7833145 | 7868418 | 35274  | 0.17 | C_unshiu_02144 | 1      | 35247  | 35247  | 100   | 99.91 |
| chr4 | 7880942 | 7904482 | 23541  | 0.11 | C_unshiu_02540 | 23540  | 1      | 23540  | 100   | 99.99 |
| chr4 | 7920550 | 7947662 | 27113  | 0.13 | C_unshiu_00019 | 789338 | 762239 | 27100  | 3.2   | 99.94 |
| chr4 | 7927673 | 7963100 | 35428  | 0.17 | C_unshiu_00019 | 782215 | 746801 | 35415  | 4.18  | 99.96 |
| chr4 | 7965931 | 8068052 | 102122 | 0.49 | C_unshiu_00019 | 742417 | 640202 | 102216 | 12.07 | 99.85 |
| chr4 | 8074914 | 8076746 | 1833   | 0.01 | C_unshiu_00019 | 640395 | 638562 | 1834   | 0.22  | 99.18 |
| chr4 | 8076769 | 8082538 | 5770   | 0.03 | C_unshiu_00019 | 620302 | 626064 | 5763   | 0.68  | 99.72 |
| chr4 | 8083455 | 8104197 | 20743  | 0.1  | C_unshiu_00019 | 609442 | 588700 | 20743  | 2.45  | 99.11 |
| chr4 | 8104359 | 8117457 | 13099  | 0.06 | C_unshiu_00019 | 588611 | 575513 | 13099  | 1.55  | 99.99 |
| chr4 | 8120027 | 8145994 | 25968  | 0.12 | C_unshiu_00019 | 573795 | 547818 | 25978  | 3.07  | 99.86 |
| chr4 | 8149699 | 8174975 | 25277  | 0.12 | C_unshiu_00019 | 543130 | 517862 | 25269  | 2.98  | 99.96 |
| chr4 | 8154954 | 8198469 | 43516  | 0.21 | C_unshiu_00019 | 537875 | 494381 | 43495  | 5.14  | 99.85 |
| chr4 | 8199052 | 8201388 | 2337   | 0.01 | C_unshiu_00019 | 493021 | 490685 | 2337   | 0.28  | 99.14 |
| chr4 | 8203680 | 8226764 | 23085  | 0.11 | C_unshiu_00019 | 481783 | 458698 | 23086  | 2.73  | 99.71 |
| chr4 | 8225409 | 8232262 | 6854   | 0.03 | C_unshiu_00019 | 459699 | 452866 | 6834   | 0.81  | 98.79 |
| chr4 | 8235285 | 8258356 | 23072  | 0.11 | C_unshiu_00019 | 449282 | 426210 | 23073  | 2.72  | 99.98 |
| chr4 | 8262078 | 8266431 | 4354   | 0.02 | C_unshiu_00019 | 422752 | 418401 | 4352   | 0.51  | 99.43 |
| chr4 | 8268703 | 8270893 | 2191   | 0.01 | C_unshiu_00019 | 416212 | 414021 | 2192   | 0.26  | 99.77 |

|      |          |          |        |      |                |        |        |        |       |       |
|------|----------|----------|--------|------|----------------|--------|--------|--------|-------|-------|
| chr4 | 8273342  | 8377820  | 104479 | 0.5  | C_unshiu_00019 | 412007 | 307526 | 104482 | 12.34 | 99.96 |
| chr4 | 8378154  | 8552715  | 174562 | 0.83 | C_unshiu_00019 | 306387 | 131823 | 174565 | 20.61 | 99.97 |
| chr4 | 8553573  | 8607346  | 53774  | 0.26 | C_unshiu_00019 | 130379 | 76605  | 53775  | 6.35  | 99.93 |
| chr4 | 8608078  | 8624740  | 16663  | 0.08 | C_unshiu_00019 | 75660  | 59003  | 16658  | 1.97  | 99.94 |
| chr4 | 8624747  | 8626788  | 2042   | 0.01 | C_unshiu_00019 | 59328  | 57293  | 2036   | 0.24  | 99.32 |
| chr4 | 8630598  | 8633687  | 3090   | 0.01 | C_unshiu_01309 | 38434  | 41523  | 3090   | 4.05  | 100   |
| chr4 | 8633682  | 8675722  | 42041  | 0.2  | C_unshiu_00061 | 495905 | 537942 | 42038  | 7.26  | 99.99 |
| chr4 | 8675622  | 8707101  | 31480  | 0.15 | C_unshiu_00061 | 538321 | 569796 | 31476  | 5.44  | 99.82 |
| chr4 | 8715643  | 8723009  | 7367   | 0.04 | C_unshiu_01396 | 57137  | 49785  | 7353   | 10.42 | 99.76 |
| chr4 | 8724420  | 8741323  | 16904  | 0.08 | C_unshiu_01396 | 49732  | 32819  | 16914  | 23.97 | 99.13 |
| chr4 | 8741009  | 8751186  | 10178  | 0.05 | C_unshiu_01396 | 33030  | 22853  | 10178  | 14.42 | 99.7  |
| chr4 | 8754910  | 8755950  | 1041   | 0    | C_unshiu_00400 | 9546   | 10578  | 1033   | 0.46  | 98.66 |
| chr4 | 8755581  | 8759388  | 3808   | 0.02 | C_unshiu_01396 | 19288  | 15488  | 3801   | 5.39  | 99.82 |
| chr4 | 8759622  | 8764344  | 4723   | 0.02 | C_unshiu_01396 | 15049  | 10326  | 4724   | 6.69  | 99.98 |
| chr4 | 8801129  | 8813006  | 11878  | 0.06 | C_unshiu_01991 | 17618  | 29498  | 11881  | 29.06 | 99.84 |
| chr4 | 8820953  | 8822211  | 1259   | 0.01 | C_unshiu_01771 | 47027  | 48284  | 1258   | 2.54  | 98.41 |
| chr4 | 8828238  | 8841149  | 12912  | 0.06 | C_unshiu_01811 | 34163  | 47047  | 12885  | 26.79 | 99.02 |
| chr4 | 8847277  | 8854804  | 7528   | 0.04 | C_unshiu_01771 | 46090  | 38554  | 7537   | 15.21 | 98.82 |
| chr4 | 8859907  | 8889022  | 29116  | 0.14 | C_unshiu_01771 | 34893  | 5743   | 29151  | 58.85 | 99.55 |
| chr4 | 8889472  | 8895176  | 5705   | 0.03 | C_unshiu_00274 | 279116 | 273431 | 5686   | 2.04  | 99.11 |
| chr4 | 8898361  | 8958488  | 60128  | 0.29 | C_unshiu_00274 | 271022 | 210989 | 60034  | 21.51 | 99.05 |
| chr4 | 8958333  | 8971232  | 12900  | 0.06 | C_unshiu_00274 | 210959 | 198013 | 12947  | 4.64  | 99.3  |
| chr4 | 8971949  | 8981411  | 9463   | 0.05 | C_unshiu_00274 | 198043 | 188574 | 9470   | 3.39  | 99.78 |
| chr4 | 8999313  | 9010675  | 11363  | 0.05 | C_unshiu_00274 | 170747 | 159379 | 11369  | 4.07  | 99    |
| chr4 | 9014144  | 9022223  | 8080   | 0.04 | C_unshiu_00274 | 155463 | 147406 | 8058   | 2.89  | 98.58 |
| chr4 | 9023937  | 9039441  | 15505  | 0.07 | C_unshiu_00274 | 140966 | 125462 | 15505  | 5.56  | 99.5  |
| chr4 | 9040669  | 9055286  | 14618  | 0.07 | C_unshiu_00274 | 125087 | 110469 | 14619  | 5.24  | 99.54 |
| chr4 | 9055923  | 9059762  | 3840   | 0.02 | C_unshiu_00274 | 109864 | 106025 | 3840   | 1.38  | 99.69 |
| chr4 | 9061140  | 9064348  | 3209   | 0.02 | C_unshiu_00274 | 104047 | 100840 | 3208   | 1.15  | 99.78 |
| chr4 | 9075266  | 9077839  | 2574   | 0.01 | C_unshiu_00274 | 89870  | 87297  | 2574   | 0.92  | 99.84 |
| chr4 | 9078331  | 9103785  | 25455  | 0.12 | C_unshiu_00274 | 86700  | 61306  | 25395  | 9.1   | 98.97 |
| chr4 | 9106155  | 9107685  | 1531   | 0.01 | C_unshiu_00074 | 114452 | 115982 | 1531   | 0.3   | 100   |
| chr4 | 9107686  | 9120930  | 13245  | 0.06 | C_unshiu_00274 | 57836  | 44583  | 13254  | 4.75  | 99.71 |
| chr4 | 9138406  | 9152483  | 14078  | 0.07 | C_unshiu_00274 | 28612  | 14554  | 14059  | 5.04  | 99.1  |
| chr4 | 9152483  | 9161649  | 9167   | 0.04 | C_unshiu_00274 | 14399  | 5179   | 9221   | 3.3   | 98.96 |
| chr4 | 9173373  | 9191262  | 17890  | 0.09 | C_unshiu_00369 | 225560 | 207624 | 17937  | 7.71  | 99.49 |
| chr4 | 9193250  | 9233134  | 39885  | 0.19 | C_unshiu_00369 | 203105 | 163076 | 40030  | 17.21 | 99.1  |
| chr4 | 9233147  | 9234930  | 1784   | 0.01 | C_unshiu_00369 | 162683 | 160900 | 1784   | 0.77  | 99.89 |
| chr4 | 9234951  | 9237850  | 2900   | 0.01 | C_unshiu_00369 | 156955 | 154037 | 2919   | 1.25  | 99.8  |
| chr4 | 9242473  | 9253822  | 11350  | 0.05 | C_unshiu_00369 | 150360 | 139047 | 11314  | 4.86  | 98.66 |
| chr4 | 9265944  | 9283847  | 17904  | 0.09 | C_unshiu_00369 | 132270 | 114407 | 17864  | 7.68  | 98.28 |
| chr4 | 9284037  | 9290047  | 6011   | 0.03 | C_unshiu_00369 | 113999 | 107988 | 6012   | 2.58  | 99.35 |
| chr4 | 9292356  | 9298310  | 5955   | 0.03 | C_unshiu_00369 | 105289 | 99317  | 5973   | 2.57  | 99.61 |
| chr4 | 9312898  | 9330503  | 17606  | 0.08 | C_unshiu_01129 | 57044  | 39440  | 17605  | 19    | 99.95 |
| chr4 | 9330029  | 9355855  | 25827  | 0.12 | C_unshiu_01129 | 39675  | 13843  | 25833  | 27.88 | 99.95 |
| chr4 | 9355849  | 9359919  | 4071   | 0.02 | C_unshiu_01062 | 47246  | 51316  | 4071   | 4.11  | 100   |
| chr4 | 9359920  | 9370333  | 10414  | 0.05 | C_unshiu_01129 | 10296  | 1      | 10296  | 11.11 | 98.71 |
| chr4 | 9377047  | 9379805  | 2759   | 0.01 | C_unshiu_00392 | 101966 | 104724 | 2759   | 1.23  | 99.96 |
| chr4 | 9379711  | 9465182  | 85472  | 0.41 | C_unshiu_00392 | 104677 | 190151 | 85475  | 38.03 | 99.99 |
| chr4 | 9476188  | 9478338  | 2151   | 0.01 | C_unshiu_00781 | 43869  | 41718  | 2152   | 1.64  | 99.63 |
| chr4 | 9479587  | 9500533  | 20947  | 0.1  | C_unshiu_00781 | 40006  | 19083  | 20924  | 15.98 | 99.13 |
| chr4 | 9515153  | 9516636  | 1484   | 0.01 | C_unshiu_00481 | 5560   | 7046   | 1487   | 0.75  | 99.66 |
| chr4 | 9518863  | 9522524  | 3662   | 0.02 | C_unshiu_00481 | 10940  | 14612  | 3673   | 1.86  | 98.35 |
| chr4 | 9542654  | 9544422  | 1769   | 0.01 | C_unshiu_01700 | 15259  | 13489  | 1771   | 3.37  | 98.7  |
| chr4 | 9551417  | 9597161  | 45745  | 0.22 | C_unshiu_01831 | 889    | 46523  | 45635  | 96.38 | 99.2  |
| chr4 | 9606574  | 9664717  | 58144  | 0.28 | C_unshiu_00288 | 959    | 59107  | 58149  | 21.34 | 99.98 |
| chr4 | 9664326  | 9697913  | 33588  | 0.16 | C_unshiu_00288 | 59119  | 92707  | 33589  | 12.32 | 99.97 |
| chr4 | 9697907  | 9700241  | 2335   | 0.01 | C_unshiu_00044 | 186187 | 183853 | 2335   | 0.37  | 100   |
| chr4 | 9716750  | 9806332  | 89583  | 0.43 | C_unshiu_01115 | 20     | 89364  | 89345  | 94.81 | 99.62 |
| chr4 | 9796364  | 9812733  | 16370  | 0.08 | C_unshiu_01727 | 33593  | 49986  | 16394  | 31.77 | 99.73 |
| chr4 | 9810771  | 9812733  | 1963   | 0.01 | C_unshiu_00814 | 121628 | 123593 | 1966   | 1.55  | 98.78 |
| chr4 | 9814093  | 9815137  | 1045   | 0    | C_unshiu_00641 | 144603 | 143559 | 1045   | 0.66  | 99.81 |
| chr4 | 9815129  | 9888909  | 73781  | 0.35 | C_unshiu_00641 | 142795 | 69007  | 73789  | 46.61 | 99.98 |
| chr4 | 9888983  | 9955107  | 66125  | 0.32 | C_unshiu_00641 | 68356  | 2248   | 66109  | 41.76 | 99.86 |
| chr4 | 9955974  | 10023167 | 67194  | 0.32 | C_unshiu_00840 | 11     | 66947  | 66937  | 54.12 | 98.96 |
| chr4 | 10023313 | 10026074 | 2762   | 0.01 | C_unshiu_00840 | 67393  | 70141  | 2749   | 2.22  | 98.95 |
| chr4 | 10028285 | 10029653 | 1369   | 0.01 | C_unshiu_00840 | 71049  | 72417  | 1369   | 1.11  | 98.18 |
| chr4 | 10029736 | 10032276 | 2541   | 0.01 | C_unshiu_01013 | 72029  | 74571  | 2543   | 2.43  | 98.16 |
| chr4 | 10033538 | 10046063 | 12526  | 0.06 | C_unshiu_00840 | 72417  | 84932  | 12516  | 10.12 | 99.91 |
| chr4 | 10047990 | 10067293 | 19304  | 0.09 | C_unshiu_00200 | 268266 | 249018 | 19249  | 5.73  | 99.15 |
| chr4 | 10074287 | 10075616 | 1330   | 0.01 | C_unshiu_00200 | 241461 | 240130 | 1332   | 0.4   | 98.27 |
| chr4 | 10120275 | 10164087 | 43813  | 0.21 | C_unshiu_00652 | 46066  | 89878  | 43813  | 28.21 | 99.96 |
| chr4 | 10164553 | 10166090 | 1538   | 0.01 | C_unshiu_00652 | 90831  | 92368  | 1538   | 0.99  | 100   |
| chr4 | 10166088 | 10203634 | 37547  | 0.18 | C_unshiu_00652 | 92552  | 130124 | 37573  | 24.19 | 99.87 |
| chr4 | 10203906 | 10228497 | 24592  | 0.12 | C_unshiu_00652 | 130782 | 155328 | 24547  | 15.8  | 99.48 |
| chr4 | 10257603 | 10260933 | 3331   | 0.02 | C_unshiu_00062 | 551611 | 548279 | 3333   | 0.59  | 99.67 |
| chr4 | 10261961 | 10268729 | 6769   | 0.03 | C_unshiu_00062 | 546753 | 539985 | 6769   | 1.21  | 99.96 |
| chr4 | 10268711 | 10339200 | 70490  | 0.34 | C_unshiu_00062 | 539903 | 469421 | 70483  | 12.55 | 99.96 |
| chr4 | 10340858 | 10343008 | 2151   | 0.01 | C_unshiu_00062 | 467222 | 465091 | 2132   | 0.38  | 98.19 |

|      |          |          |       |      |                |        |        |       |       |       |
|------|----------|----------|-------|------|----------------|--------|--------|-------|-------|-------|
| chr4 | 10344007 | 10345783 | 1777  | 0.01 | C_unshiu_00062 | 463752 | 461976 | 1777  | 0.32  | 100   |
| chr4 | 10346227 | 10391294 | 45068 | 0.22 | C_unshiu_00062 | 461086 | 415991 | 45096 | 8.03  | 99.65 |
| chr4 | 10406303 | 10409149 | 2847  | 0.01 | C_unshiu_00415 | 67425  | 70279  | 2855  | 1.29  | 99.23 |
| chr4 | 10410111 | 10411257 | 1147  | 0.01 | C_unshiu_00576 | 147595 | 146448 | 1148  | 0.67  | 99.39 |
| chr4 | 10412265 | 10440864 | 28600 | 0.14 | C_unshiu_00576 | 145013 | 116463 | 28551 | 16.57 | 99.24 |
| chr4 | 10437420 | 10441424 | 4005  | 0.02 | C_unshiu_03135 | 2383   | 6374   | 3992  | 59.67 | 98.43 |
| chr4 | 10451625 | 10455117 | 3493  | 0.02 | C_unshiu_00576 | 111470 | 107979 | 3492  | 2.03  | 98.71 |
| chr4 | 10455112 | 10457670 | 2559  | 0.01 | C_unshiu_00576 | 106783 | 104223 | 2561  | 1.49  | 99.02 |
| chr4 | 10458820 | 10466904 | 8085  | 0.04 | C_unshiu_00576 | 102379 | 94315  | 8065  | 4.68  | 99.54 |
| chr4 | 10467147 | 10471942 | 4796  | 0.02 | C_unshiu_00576 | 89216  | 84415  | 4802  | 2.79  | 99.71 |
| chr4 | 10484542 | 10493782 | 9241  | 0.04 | C_unshiu_02122 | 34990  | 25775  | 9216  | 25.72 | 98.85 |
| chr4 | 10494979 | 10500041 | 5063  | 0.02 | C_unshiu_02122 | 24268  | 19231  | 5038  | 14.06 | 98.54 |
| chr4 | 10500995 | 10511563 | 10569 | 0.05 | C_unshiu_00415 | 14678  | 25258  | 10581 | 4.8   | 99.05 |
| chr4 | 10516070 | 10517636 | 1567  | 0.01 | C_unshiu_02076 | 37410  | 35844  | 1567  | 4.19  | 100   |
| chr4 | 10524167 | 10529774 | 5608  | 0.03 | C_unshiu_02076 | 33142  | 27536  | 5607  | 14.98 | 99.75 |
| chr4 | 10548856 | 10552746 | 3891  | 0.02 | C_unshiu_00995 | 72412  | 68536  | 3877  | 3.63  | 98.18 |
| chr4 | 10557375 | 10558532 | 1158  | 0.01 | C_unshiu_00995 | 63663  | 62515  | 1149  | 1.08  | 98.88 |
| chr4 | 10571879 | 10576026 | 4148  | 0.02 | C_unshiu_01299 | 74547  | 70386  | 4162  | 5.37  | 99.5  |
| chr4 | 10578916 | 10584568 | 5653  | 0.03 | C_unshiu_01561 | 52960  | 47305  | 5656  | 9.45  | 98.76 |
| chr4 | 10584846 | 10587365 | 2520  | 0.01 | C_unshiu_01561 | 46554  | 44033  | 2522  | 4.22  | 99.17 |
| chr4 | 10587569 | 10592451 | 4883  | 0.02 | C_unshiu_01561 | 44311  | 39427  | 4885  | 8.17  | 99.39 |
| chr4 | 10625877 | 10632809 | 6933  | 0.03 | C_unshiu_00426 | 96     | 7061   | 6966  | 3.21  | 98.08 |
| chr4 | 10669084 | 10672171 | 3088  | 0.01 | C_unshiu_00426 | 39161  | 42264  | 3104  | 1.43  | 98.97 |
| chr4 | 10672218 | 10676284 | 4067  | 0.02 | C_unshiu_00204 | 45848  | 49914  | 4067  | 1.22  | 99.9  |
| chr4 | 10680453 | 10704513 | 24061 | 0.11 | C_unshiu_00204 | 53611  | 77669  | 24059 | 7.23  | 99.83 |
| chr4 | 10705074 | 10719849 | 14776 | 0.07 | C_unshiu_00426 | 46969  | 61792  | 14824 | 6.83  | 98.01 |
| chr4 | 10719785 | 10722056 | 2272  | 0.01 | C_unshiu_00204 | 94690  | 96961  | 2272  | 0.68  | 98.81 |
| chr4 | 10728390 | 10735864 | 7475  | 0.04 | C_unshiu_00204 | 100093 | 107567 | 7475  | 2.25  | 99.51 |
| chr4 | 10735085 | 10738896 | 3812  | 0.02 | C_unshiu_02900 | 1      | 3811   | 3811  | 24.24 | 99.48 |
| chr4 | 10739381 | 10741226 | 1846  | 0.01 | C_unshiu_02487 | 23145  | 21300  | 1846  | 7.39  | 99.84 |
| chr4 | 10742340 | 10758532 | 16193 | 0.08 | C_unshiu_00459 | 2279   | 18479  | 16201 | 7.9   | 99.12 |
| chr4 | 10758764 | 10768062 | 9299  | 0.04 | C_unshiu_00459 | 18905  | 28253  | 9349  | 4.56  | 98.04 |
| chr4 | 10776023 | 10780327 | 4305  | 0.02 | C_unshiu_00459 | 35437  | 39741  | 4305  | 2.1   | 99.79 |
| chr4 | 10780345 | 10786289 | 5945  | 0.03 | C_unshiu_00459 | 40833  | 46773  | 5941  | 2.9   | 98.99 |
| chr4 | 10800897 | 10805381 | 4485  | 0.02 | C_unshiu_00459 | 56019  | 60503  | 4485  | 2.19  | 98.47 |
| chr4 | 10805382 | 10819471 | 14090 | 0.07 | C_unshiu_00459 | 61124  | 75218  | 14095 | 6.87  | 99.87 |
| chr4 | 10819307 | 10825075 | 5769  | 0.03 | C_unshiu_00459 | 75222  | 80989  | 5768  | 2.81  | 99.13 |
| chr4 | 10833389 | 10834794 | 1406  | 0.01 | C_unshiu_01840 | 45496  | 46893  | 1398  | 2.98  | 99.43 |
| chr4 | 10868314 | 10878820 | 10507 | 0.05 | C_unshiu_00459 | 117616 | 128131 | 10516 | 5.13  | 99.1  |
| chr4 | 10893178 | 10894515 | 1338  | 0.01 | C_unshiu_00761 | 107336 | 108663 | 1328  | 0.98  | 98.06 |
| chr4 | 10906282 | 10907588 | 1307  | 0.01 | C_unshiu_00029 | 507155 | 508475 | 1321  | 0.18  | 98.56 |
| chr4 | 10907689 | 10909029 | 1341  | 0.01 | C_unshiu_01095 | 53333  | 51993  | 1341  | 1.39  | 100   |
| chr4 | 10937769 | 10948836 | 11068 | 0.05 | C_unshiu_01095 | 20217  | 9197   | 11021 | 11.44 | 98.49 |
| chr4 | 10950158 | 10953167 | 3010  | 0.01 | C_unshiu_01428 | 13287  | 16312  | 3026  | 4.43  | 98.88 |
| chr4 | 10980652 | 10986032 | 5381  | 0.03 | C_unshiu_01428 | 54944  | 60325  | 5382  | 7.88  | 99.57 |
| chr4 | 10981929 | 10986814 | 4886  | 0.02 | C_unshiu_01427 | 1      | 4883   | 4883  | 7.14  | 99.39 |
| chr4 | 10990225 | 10991518 | 1294  | 0.01 | C_unshiu_01427 | 9583   | 10877  | 1295  | 1.89  | 99.46 |
| chr4 | 10992439 | 10996377 | 3939  | 0.02 | C_unshiu_01427 | 10710  | 14649  | 3940  | 5.76  | 99.59 |
| chr4 | 10996365 | 11026326 | 29962 | 0.14 | C_unshiu_01427 | 14960  | 44888  | 29929 | 43.73 | 99.36 |
| chr4 | 11026810 | 11049291 | 22482 | 0.11 | C_unshiu_01427 | 45948  | 68435  | 22488 | 32.86 | 99.71 |
| chr4 | 11060782 | 11064480 | 3699  | 0.02 | C_unshiu_00699 | 143749 | 140094 | 3656  | 2.54  | 98.57 |
| chr4 | 11064883 | 11073662 | 8780  | 0.04 | C_unshiu_00065 | 516681 | 507900 | 8782  | 1.59  | 99.86 |
| chr4 | 11100818 | 11101887 | 1070  | 0.01 | C_unshiu_00699 | 111255 | 110184 | 1072  | 0.75  | 99.63 |
| chr4 | 11104281 | 11105967 | 1687  | 0.01 | C_unshiu_01538 | 20116  | 21802  | 1687  | 2.76  | 99.64 |
| chr4 | 11111713 | 11113782 | 2070  | 0.01 | C_unshiu_00275 | 6983   | 9056   | 2074  | 0.74  | 98.7  |
| chr4 | 11116009 | 11117290 | 1282  | 0.01 | C_unshiu_01538 | 27933  | 29214  | 1282  | 2.1   | 99.45 |
| chr4 | 11119165 | 11123879 | 4715  | 0.02 | C_unshiu_01538 | 31651  | 36365  | 4715  | 7.71  | 99.77 |
| chr4 | 11125350 | 11126797 | 1448  | 0.01 | C_unshiu_01538 | 38263  | 39709  | 1447  | 2.37  | 98.35 |
| chr4 | 11133735 | 11135560 | 1826  | 0.01 | C_unshiu_01538 | 42713  | 44556  | 1844  | 3.02  | 98.27 |
| chr4 | 11138532 | 11140047 | 1516  | 0.01 | C_unshiu_02347 | 26373  | 27888  | 1516  | 5.34  | 99.41 |
| chr4 | 11148676 | 11152260 | 3585  | 0.02 | C_unshiu_01538 | 57566  | 61153  | 3588  | 5.87  | 99.03 |
| chr4 | 11165165 | 11178548 | 13384 | 0.06 | C_unshiu_00275 | 29519  | 42926  | 13408 | 4.81  | 99.14 |
| chr4 | 11194926 | 11202547 | 7622  | 0.04 | C_unshiu_00275 | 56603  | 64242  | 7640  | 2.74  | 99.03 |
| chr4 | 11202573 | 11212413 | 9841  | 0.05 | C_unshiu_00275 | 64404  | 74276  | 9873  | 3.55  | 98.5  |
| chr4 | 11218247 | 11220710 | 2464  | 0.01 | C_unshiu_00275 | 81143  | 83623  | 2481  | 0.89  | 98.47 |
| chr4 | 11238382 | 11250847 | 12466 | 0.06 | C_unshiu_00275 | 98010  | 110508 | 12499 | 4.49  | 98.48 |
| chr4 | 11255642 | 11269064 | 13423 | 0.06 | C_unshiu_00275 | 113269 | 126737 | 13469 | 4.84  | 98.7  |
| chr4 | 11277723 | 11282464 | 4742  | 0.02 | C_unshiu_00275 | 136162 | 140903 | 4742  | 1.7   | 99.77 |
| chr4 | 11282460 | 11295122 | 12663 | 0.06 | C_unshiu_00275 | 141262 | 153927 | 12666 | 4.55  | 98.83 |
| chr4 | 11309608 | 11329043 | 19436 | 0.09 | C_unshiu_00275 | 169067 | 188519 | 19453 | 6.98  | 99.54 |
| chr4 | 11327243 | 11336018 | 8776  | 0.04 | C_unshiu_00858 | 24721  | 15927  | 8795  | 7.22  | 98.86 |
| chr4 | 11329852 | 11341839 | 11988 | 0.06 | C_unshiu_00275 | 189036 | 201001 | 11966 | 4.3   | 98.42 |
| chr4 | 11341840 | 11348911 | 7072  | 0.03 | C_unshiu_00275 | 201168 | 208241 | 7074  | 2.54  | 99.77 |
| chr4 | 11348913 | 11356529 | 7617  | 0.04 | C_unshiu_00275 | 208589 | 216203 | 7615  | 2.73  | 98.5  |
| chr4 | 11356547 | 11360064 | 3518  | 0.02 | C_unshiu_00275 | 217060 | 220577 | 3518  | 1.26  | 98.04 |
| chr4 | 11362952 | 11386536 | 23585 | 0.11 | C_unshiu_00049 | 23510  | 1      | 23510 | 3.8   | 99.14 |
| chr4 | 11387877 | 11393823 | 5947  | 0.03 | C_unshiu_00275 | 256076 | 262048 | 5973  | 2.14  | 98.26 |
| chr4 | 11413315 | 11421366 | 8052  | 0.04 | C_unshiu_01976 | 14961  | 22994  | 8034  | 19.34 | 98.65 |
| chr4 | 11444383 | 11450615 | 6233  | 0.03 | C_unshiu_01960 | 30783  | 24596  | 6188  | 14.61 | 98.93 |

|      |          |          |        |      |                |        |        |        |       |       |
|------|----------|----------|--------|------|----------------|--------|--------|--------|-------|-------|
| chr4 | 11455364 | 11463301 | 7938   | 0.04 | C_unshiu_01960 | 20695  | 12757  | 7939   | 18.75 | 99.82 |
| chr4 | 11464777 | 11466875 | 2099   | 0.01 | C_unshiu_01960 | 10943  | 8844   | 2100   | 4.96  | 99.95 |
| chr4 | 11466870 | 11469441 | 2572   | 0.01 | C_unshiu_01580 | 43788  | 46359  | 2572   | 4.39  | 100   |
| chr4 | 11475576 | 11476597 | 1022   | 0    | C_unshiu_00249 | 262811 | 263832 | 1022   | 0.35  | 100   |
| chr4 | 11477476 | 11479319 | 1844   | 0.01 | C_unshiu_01580 | 55940  | 57783  | 1844   | 3.14  | 99.89 |
| chr4 | 11481239 | 11485057 | 3819   | 0.02 | C_unshiu_00029 | 478018 | 481836 | 3819   | 0.53  | 100   |
| chr4 | 11486936 | 11489559 | 2624   | 0.01 | C_unshiu_01698 | 22258  | 24881  | 2624   | 4.99  | 100   |
| chr4 | 11491932 | 11495736 | 3805   | 0.02 | C_unshiu_02972 | 1      | 3802   | 3802   | 27.64 | 99.53 |
| chr4 | 11505904 | 11506957 | 1054   | 0.01 | C_unshiu_00390 | 144152 | 145205 | 1054   | 0.47  | 99.53 |
| chr4 | 11508136 | 11510428 | 2293   | 0.01 | C_unshiu_00449 | 15895  | 18187  | 2293   | 1.1   | 99.96 |
| chr4 | 11510978 | 11512491 | 1514   | 0.01 | C_unshiu_00847 | 1299   | 2814   | 1516   | 1.23  | 99.74 |
| chr4 | 11513518 | 11630370 | 116853 | 0.56 | C_unshiu_00847 | 4255   | 121176 | 116922 | 95.14 | 99.93 |
| chr4 | 11639081 | 11673105 | 34025  | 0.16 | C_unshiu_00895 | 97569  | 63484  | 34086  | 28.97 | 99.81 |
| chr4 | 11673107 | 11676634 | 3528   | 0.02 | C_unshiu_00895 | 63550  | 60023  | 3528   | 3     | 100   |
| chr4 | 11677866 | 11735740 | 57875  | 0.28 | C_unshiu_00895 | 58330  | 453    | 57878  | 49.19 | 99.46 |
| chr4 | 11735740 | 11758211 | 22472  | 0.11 | C_unshiu_00461 | 8258   | 30728  | 22471  | 11    | 99.99 |
| chr4 | 11758959 | 11764065 | 5107   | 0.02 | C_unshiu_00461 | 32147  | 37254  | 5108   | 2.5   | 99.98 |
| chr4 | 11764092 | 11770399 | 6308   | 0.03 | C_unshiu_00461 | 37140  | 43447  | 6308   | 3.09  | 100   |
| chr4 | 11770400 | 11923027 | 152628 | 0.73 | C_unshiu_00461 | 43612  | 196264 | 152653 | 74.72 | 99.96 |
| chr4 | 11922579 | 11926877 | 4299   | 0.02 | C_unshiu_00885 | 1      | 4355   | 4355   | 3.67  | 98.62 |
| chr4 | 11926410 | 11938522 | 12113  | 0.06 | C_unshiu_00885 | 13728  | 25843  | 12116  | 10.2  | 99.93 |
| chr4 | 11940395 | 11959564 | 19170  | 0.09 | C_unshiu_00885 | 31188  | 50359  | 19172  | 16.14 | 99.95 |
| chr4 | 11964551 | 12008176 | 43626  | 0.21 | C_unshiu_00885 | 54713  | 98362  | 43650  | 36.74 | 99.75 |
| chr4 | 11988166 | 12012735 | 24570  | 0.12 | C_unshiu_00885 | 78325  | 102921 | 24597  | 20.7  | 99.89 |
| chr4 | 12012739 | 12024675 | 11937  | 0.06 | C_unshiu_00885 | 105787 | 117723 | 11937  | 10.05 | 99.97 |
| chr4 | 12032456 | 12067855 | 35400  | 0.17 | C_unshiu_01410 | 8061   | 43461  | 35401  | 50.52 | 99.99 |
| chr4 | 12073819 | 12077351 | 3533   | 0.02 | C_unshiu_00364 | 201550 | 205082 | 3533   | 1.51  | 100   |
| chr4 | 12077353 | 12104103 | 26751  | 0.13 | C_unshiu_00364 | 207735 | 234491 | 26757  | 11.41 | 99.89 |
| chr4 | 12108679 | 12165944 | 57266  | 0.27 | C_unshiu_00665 | 1      | 57251  | 57251  | 37.44 | 99.92 |
| chr4 | 12169611 | 12210061 | 40451  | 0.19 | C_unshiu_00665 | 60810  | 101178 | 40369  | 26.4  | 99.61 |
| chr4 | 12210298 | 12212796 | 2499   | 0.01 | C_unshiu_00665 | 101613 | 104111 | 2499   | 1.63  | 99.68 |
| chr4 | 12215762 | 12217208 | 1447   | 0.01 | C_unshiu_00292 | 64153  | 65598  | 1446   | 0.54  | 99.52 |
| chr4 | 12217203 | 12218216 | 1014   | 0    | C_unshiu_00016 | 84886  | 85899  | 1014   | 0.12  | 100   |
| chr4 | 12218217 | 12228867 | 10651  | 0.05 | C_unshiu_00665 | 108648 | 119278 | 10631  | 6.95  | 99.46 |
| chr4 | 12229562 | 12249888 | 20327  | 0.1  | C_unshiu_00665 | 120581 | 140801 | 20221  | 13.23 | 99.3  |
| chr4 | 12252548 | 12264218 | 11671  | 0.06 | C_unshiu_00665 | 141227 | 152896 | 11670  | 7.63  | 99.99 |
| chr4 | 12277486 | 12301402 | 23917  | 0.11 | C_unshiu_02053 | 1      | 23922  | 23922  | 62.28 | 99.9  |
| chr4 | 12301415 | 12303763 | 2349   | 0.01 | C_unshiu_02053 | 24351  | 26699  | 2349   | 6.12  | 100   |
| chr4 | 12308240 | 12313982 | 5743   | 0.03 | C_unshiu_02053 | 31677  | 37421  | 5745   | 14.96 | 99.81 |
| chr4 | 12314836 | 12320175 | 5340   | 0.03 | C_unshiu_02753 | 12212  | 6872   | 5341   | 28.13 | 99.78 |
| chr4 | 12329357 | 12347390 | 18034  | 0.09 | C_unshiu_01260 | 70298  | 52265  | 18034  | 22.52 | 99.99 |
| chr4 | 12347385 | 12348852 | 1468   | 0.01 | C_unshiu_00888 | 26874  | 28341  | 1468   | 1.24  | 100   |
| chr4 | 12350405 | 12353670 | 3266   | 0.02 | C_unshiu_01260 | 49839  | 46574  | 3266   | 4.08  | 99.51 |
| chr4 | 12353566 | 12396030 | 42465  | 0.2  | C_unshiu_01260 | 46557  | 4100   | 42458  | 53.02 | 99.91 |
| chr4 | 12397519 | 12399995 | 2477   | 0.01 | C_unshiu_00225 | 28989  | 26511  | 2479   | 0.79  | 98.35 |
| chr4 | 12401019 | 12403103 | 2085   | 0.01 | C_unshiu_00225 | 25108  | 23023  | 2086   | 0.67  | 99.95 |
| chr4 | 12407503 | 12417942 | 10440  | 0.05 | C_unshiu_00225 | 20780  | 10435  | 10346  | 3.31  | 98.61 |
| chr4 | 12428938 | 12430645 | 1708   | 0.01 | C_unshiu_00700 | 76969  | 75259  | 1711   | 1.19  | 99.12 |
| chr4 | 12430762 | 12434148 | 3387   | 0.02 | C_unshiu_00700 | 75104  | 71711  | 3394   | 2.36  | 98.38 |
| chr4 | 12438598 | 12439882 | 1285   | 0.01 | C_unshiu_00576 | 147596 | 148880 | 1285   | 0.75  | 100   |
| chr4 | 12440703 | 12469033 | 28331  | 0.14 | C_unshiu_00700 | 65267  | 36944  | 28324  | 19.71 | 99.56 |
| chr4 | 12469058 | 12472762 | 3705   | 0.02 | C_unshiu_00700 | 94370  | 90664  | 3707   | 2.58  | 99.33 |
| chr4 | 12474816 | 12481598 | 6783   | 0.03 | C_unshiu_00250 | 291592 | 284811 | 6782   | 2.3   | 99.81 |
| chr4 | 12482707 | 12528961 | 46255  | 0.22 | C_unshiu_00250 | 284419 | 238162 | 46258  | 15.66 | 99.87 |
| chr4 | 12529625 | 12576997 | 47373  | 0.23 | C_unshiu_00250 | 237014 | 189635 | 47380  | 16.04 | 99.99 |
| chr4 | 12557002 | 12630969 | 73968  | 0.35 | C_unshiu_00250 | 209637 | 135661 | 73977  | 25.05 | 99.98 |
| chr4 | 12633206 | 12664979 | 31774  | 0.15 | C_unshiu_00250 | 132874 | 101085 | 31790  | 10.77 | 99.93 |
| chr4 | 12664651 | 12697065 | 32415  | 0.15 | C_unshiu_00250 | 96571  | 64157  | 32415  | 10.98 | 99.95 |
| chr4 | 12697291 | 12699211 | 1921   | 0.01 | C_unshiu_00250 | 63711  | 61792  | 1920   | 0.65  | 99.9  |
| chr4 | 12699037 | 12704251 | 5215   | 0.02 | C_unshiu_00250 | 61790  | 56555  | 5236   | 1.77  | 98.64 |
| chr4 | 12703509 | 12746457 | 42949  | 0.21 | C_unshiu_00250 | 57124  | 14220  | 42905  | 14.53 | 99.85 |
| chr4 | 12746456 | 12755816 | 9361   | 0.04 | C_unshiu_00250 | 13929  | 4571   | 9359   | 3.17  | 99.95 |
| chr4 | 12763045 | 12764212 | 1168   | 0.01 | C_unshiu_00086 | 400133 | 398966 | 1168   | 0.25  | 99.49 |
| chr4 | 12764210 | 12765508 | 1299   | 0.01 | C_unshiu_00298 | 173471 | 174769 | 1299   | 0.49  | 100   |
| chr4 | 12765508 | 12793609 | 28102  | 0.13 | C_unshiu_00086 | 396917 | 368804 | 28114  | 5.96  | 99.94 |
| chr4 | 12773597 | 12823337 | 49741  | 0.24 | C_unshiu_00086 | 388828 | 339061 | 49768  | 10.56 | 99.94 |
| chr4 | 12803365 | 12859321 | 55957  | 0.27 | C_unshiu_00086 | 359048 | 303077 | 55972  | 11.87 | 99.97 |
| chr4 | 12859314 | 12905257 | 45944  | 0.22 | C_unshiu_00086 | 303047 | 257161 | 45887  | 9.74  | 99.74 |
| chr4 | 12905567 | 12910794 | 5228   | 0.02 | C_unshiu_00086 | 256378 | 251151 | 5228   | 1.11  | 100   |
| chr4 | 12910818 | 12942481 | 31664  | 0.15 | C_unshiu_00086 | 250843 | 219221 | 31623  | 6.71  | 99.44 |
| chr4 | 12943546 | 12956809 | 13264  | 0.06 | C_unshiu_00086 | 219394 | 206127 | 13268  | 2.81  | 99.97 |
| chr4 | 12958311 | 13162352 | 204042 | 0.97 | C_unshiu_00086 | 204056 | 43     | 204014 | 43.28 | 99.82 |
| chr4 | 13160541 | 13212064 | 51524  | 0.25 | C_unshiu_01642 | 1      | 51524  | 51524  | 92.91 | 99.99 |
| chr4 | 13213743 | 13216089 | 2347   | 0.01 | C_unshiu_00154 | 18626  | 20979  | 2354   | 0.62  | 98.77 |
| chr4 | 13216851 | 13218962 | 2112   | 0.01 | C_unshiu_00416 | 184718 | 186824 | 2107   | 0.96  | 99.01 |
| chr4 | 13218955 | 13225570 | 6616   | 0.03 | C_unshiu_00416 | 184717 | 178102 | 6616   | 3.01  | 100   |
| chr4 | 13227426 | 13275962 | 48537  | 0.23 | C_unshiu_00416 | 174767 | 126231 | 48537  | 22.05 | 100   |
| chr4 | 13278203 | 13342538 | 64336  | 0.31 | C_unshiu_00416 | 124211 | 59864  | 64348  | 29.24 | 99.84 |
| chr4 | 13342771 | 13398747 | 55977  | 0.27 | C_unshiu_00416 | 59579  | 3749   | 55831  | 25.37 | 99.5  |

|      |          |          |        |      |                |        |        |        |       |       |
|------|----------|----------|--------|------|----------------|--------|--------|--------|-------|-------|
| chr4 | 13405242 | 13407418 | 2177   | 0.01 | C_unshiu_00548 | 75548  | 73367  | 2182   | 1.22  | 99.04 |
| chr4 | 13407420 | 13410206 | 2787   | 0.01 | C_unshiu_00548 | 73182  | 70382  | 2801   | 1.57  | 99.07 |
| chr4 | 13410284 | 13413343 | 3060   | 0.01 | C_unshiu_00548 | 70165  | 67109  | 3057   | 1.71  | 99.41 |
| chr4 | 13422887 | 13438591 | 15705  | 0.08 | C_unshiu_00548 | 62987  | 47270  | 15718  | 8.79  | 99.61 |
| chr4 | 13438591 | 13439614 | 1024   | 0    | C_unshiu_01764 | 34942  | 33919  | 1024   | 2.05  | 100   |
| chr4 | 13439614 | 13439707 | 20094  | 0.1  | C_unshiu_00548 | 46631  | 26456  | 20176  | 11.28 | 98.97 |
| chr4 | 13460571 | 13462390 | 1820   | 0.01 | C_unshiu_00548 | 24475  | 22652  | 1824   | 1.02  | 99.67 |
| chr4 | 13462861 | 13466145 | 3285   | 0.02 | C_unshiu_00548 | 21903  | 18619  | 3285   | 1.84  | 99.76 |
| chr4 | 13470462 | 13473606 | 3145   | 0.02 | C_unshiu_00548 | 7468   | 4344   | 3125   | 1.75  | 98    |
| chr4 | 13477760 | 13487533 | 9774   | 0.05 | C_unshiu_00993 | 97625  | 87861  | 9765   | 9.12  | 99.34 |
| chr4 | 13488015 | 13492700 | 4686   | 0.02 | C_unshiu_01676 | 49734  | 45052  | 4683   | 8.71  | 99.17 |
| chr4 | 13492951 | 13497892 | 4942   | 0.02 | C_unshiu_01676 | 44600  | 39661  | 4940   | 9.18  | 99.9  |
| chr4 | 13502082 | 13520459 | 18378  | 0.09 | C_unshiu_00993 | 82532  | 64101  | 18432  | 17.22 | 98.97 |
| chr4 | 13520898 | 13531419 | 10522  | 0.05 | C_unshiu_00993 | 63882  | 53360  | 10523  | 9.83  | 99.61 |
| chr4 | 13531410 | 13533915 | 2506   | 0.01 | C_unshiu_00993 | 52483  | 49978  | 2506   | 2.34  | 99.8  |
| chr4 | 13556130 | 13573614 | 17485  | 0.08 | C_unshiu_00993 | 27064  | 9548   | 17517  | 16.37 | 99.5  |
| chr4 | 13573480 | 13574636 | 1157   | 0.01 | C_unshiu_00993 | 8120   | 9262   | 1143   | 1.07  | 98.45 |
| chr4 | 13575323 | 13578509 | 3187   | 0.02 | C_unshiu_00993 | 6320   | 3116   | 3205   | 2.99  | 98.38 |
| chr4 | 13594635 | 13612490 | 17856  | 0.09 | C_unshiu_00137 | 397384 | 379488 | 17897  | 4.43  | 98.89 |
| chr4 | 13614852 | 13621705 | 6854   | 0.03 | C_unshiu_00137 | 378327 | 371480 | 6848   | 1.69  | 99.39 |
| chr4 | 13621700 | 13632313 | 10614  | 0.05 | C_unshiu_00137 | 369257 | 358663 | 10595  | 2.62  | 98.92 |
| chr4 | 13638846 | 13641819 | 2974   | 0.01 | C_unshiu_00137 | 349336 | 346360 | 2977   | 0.74  | 99.63 |
| chr4 | 13641820 | 13653583 | 11764  | 0.06 | C_unshiu_00137 | 346431 | 334672 | 11760  | 2.91  | 99.48 |
| chr4 | 13653484 | 13659812 | 6329   | 0.03 | C_unshiu_00137 | 334641 | 328301 | 6341   | 1.57  | 99.16 |
| chr4 | 13660232 | 13668755 | 8524   | 0.04 | C_unshiu_00137 | 327503 | 318967 | 8537   | 2.11  | 99.47 |
| chr4 | 13668726 | 13686602 | 17877  | 0.09 | C_unshiu_00137 | 318960 | 301100 | 17861  | 4.42  | 99.66 |
| chr4 | 13686623 | 13692751 | 6129   | 0.03 | C_unshiu_00137 | 300842 | 294704 | 6139   | 1.52  | 99.35 |
| chr4 | 13692869 | 13709795 | 16927  | 0.08 | C_unshiu_00137 | 294218 | 277205 | 17014  | 4.21  | 99.1  |
| chr4 | 13711482 | 13727328 | 15847  | 0.08 | C_unshiu_00137 | 276961 | 261079 | 15883  | 3.93  | 99.2  |
| chr4 | 13731820 | 13733110 | 1291   | 0.01 | C_unshiu_01117 | 14392  | 15681  | 1290   | 1.37  | 99.92 |
| chr4 | 13734111 | 13743070 | 8960   | 0.04 | C_unshiu_00137 | 256935 | 247941 | 8995   | 2.22  | 98.8  |
| chr4 | 13743062 | 13745746 | 2685   | 0.01 | C_unshiu_00137 | 247811 | 245126 | 2686   | 0.66  | 99.59 |
| chr4 | 13749059 | 13753478 | 4420   | 0.02 | C_unshiu_00137 | 239130 | 234703 | 4428   | 1.1   | 99.35 |
| chr4 | 13757946 | 13771758 | 13813  | 0.07 | C_unshiu_00137 | 230787 | 216949 | 13839  | 3.42  | 99.14 |
| chr4 | 13773774 | 13775132 | 1359   | 0.01 | C_unshiu_00137 | 214476 | 213118 | 1359   | 0.34  | 99.78 |
| chr4 | 13777413 | 13790762 | 13350  | 0.06 | C_unshiu_00137 | 201674 | 188326 | 13349  | 3.3   | 99.41 |
| chr4 | 13793009 | 13794339 | 1331   | 0.01 | C_unshiu_00137 | 187337 | 186012 | 1326   | 0.33  | 99.17 |
| chr4 | 13795447 | 13796914 | 1468   | 0.01 | C_unshiu_00137 | 185123 | 183657 | 1467   | 0.36  | 99.93 |
| chr4 | 13797553 | 13800123 | 2571   | 0.01 | C_unshiu_00775 | 119969 | 117399 | 2571   | 1.95  | 100   |
| chr4 | 13803189 | 13813834 | 10646  | 0.05 | C_unshiu_00137 | 178375 | 167713 | 10663  | 2.64  | 99.27 |
| chr4 | 13813792 | 13860970 | 47179  | 0.23 | C_unshiu_00137 | 167492 | 120278 | 47215  | 11.68 | 98.81 |
| chr4 | 13860964 | 13873663 | 12700  | 0.06 | C_unshiu_00137 | 115098 | 102363 | 12736  | 3.15  | 99.54 |
| chr4 | 13874821 | 13910229 | 35409  | 0.17 | C_unshiu_00137 | 100898 | 65459  | 35440  | 8.76  | 98.44 |
| chr4 | 13915884 | 13946634 | 30751  | 0.15 | C_unshiu_00137 | 60553  | 29771  | 30783  | 7.61  | 99.25 |
| chr4 | 13944379 | 13947338 | 2960   | 0.01 | C_unshiu_00137 | 66474  | 63525  | 2950   | 0.73  | 98.02 |
| chr4 | 13948352 | 13949457 | 1106   | 0.01 | C_unshiu_00137 | 28116  | 27011  | 1106   | 0.27  | 100   |
| chr4 | 13948450 | 13949549 | 1100   | 0.01 | C_unshiu_00137 | 62557  | 61457  | 1101   | 0.27  | 98.82 |
| chr4 | 13949891 | 13952083 | 2193   | 0.01 | C_unshiu_00137 | 27017  | 24851  | 2167   | 0.54  | 98.5  |
| chr4 | 13962425 | 13973011 | 10587  | 0.05 | C_unshiu_00148 | 185316 | 174731 | 10586  | 2.73  | 99.69 |
| chr4 | 13973525 | 13975117 | 1593   | 0.01 | C_unshiu_00148 | 169835 | 168235 | 1601   | 0.41  | 99.06 |
| chr4 | 13976030 | 13997663 | 21634  | 0.1  | C_unshiu_00148 | 165219 | 143563 | 21657  | 5.59  | 99.63 |
| chr4 | 13997963 | 14000289 | 2327   | 0.01 | C_unshiu_02385 | 27561  | 25235  | 2327   | 8.44  | 99.87 |
| chr4 | 14000782 | 14003461 | 2680   | 0.01 | C_unshiu_02385 | 24399  | 21720  | 2680   | 9.72  | 99.96 |
| chr4 | 14004390 | 14005833 | 1444   | 0.01 | C_unshiu_00148 | 139388 | 137945 | 1444   | 0.37  | 99.65 |
| chr4 | 14032849 | 14038657 | 5809   | 0.03 | C_unshiu_00148 | 111475 | 105609 | 5867   | 1.52  | 98.31 |
| chr4 | 14038653 | 14039892 | 1240   | 0.01 | C_unshiu_00148 | 104575 | 103334 | 1242   | 0.32  | 99.19 |
| chr4 | 14039877 | 14044343 | 4467   | 0.02 | C_unshiu_00148 | 98404  | 93914  | 4491   | 1.16  | 98.42 |
| chr4 | 14075107 | 14084985 | 9879   | 0.05 | C_unshiu_00148 | 62589  | 52721  | 9869   | 2.55  | 98.14 |
| chr4 | 14085013 | 14112273 | 27261  | 0.13 | C_unshiu_00148 | 51494  | 24226  | 27269  | 7.04  | 99.91 |
| chr4 | 14113235 | 14136293 | 23059  | 0.11 | C_unshiu_00148 | 22902  | 1      | 22902  | 5.91  | 99.18 |
| chr4 | 14154510 | 14162735 | 8226   | 0.04 | C_unshiu_00677 | 67460  | 75685  | 8226   | 5.52  | 99.99 |
| chr4 | 14162482 | 14165952 | 3471   | 0.02 | C_unshiu_00677 | 75684  | 79154  | 3471   | 2.33  | 99.91 |
| chr4 | 14165784 | 14177648 | 11865  | 0.06 | C_unshiu_00677 | 79124  | 90990  | 11867  | 7.96  | 99.61 |
| chr4 | 14177656 | 14187279 | 9624   | 0.05 | C_unshiu_00677 | 91134  | 100763 | 9630   | 6.46  | 98.57 |
| chr4 | 14192832 | 14294170 | 101339 | 0.48 | C_unshiu_00061 | 163667 | 62336  | 101332 | 17.5  | 99.98 |
| chr4 | 14294026 | 14356406 | 62381  | 0.3  | C_unshiu_00061 | 62422  | 1      | 62422  | 10.78 | 99.92 |
| chr4 | 14355555 | 14402077 | 46523  | 0.22 | C_unshiu_01757 | 1      | 46524  | 46524  | 92.8  | 99.98 |
| chr4 | 14402427 | 14404135 | 1709   | 0.01 | C_unshiu_01757 | 49399  | 47690  | 1710   | 3.41  | 99.94 |
| chr4 | 14420035 | 14510990 | 90956  | 0.43 | C_unshiu_00244 | 158889 | 249664 | 90776  | 30.24 | 99.4  |
| chr4 | 14515566 | 14522138 | 6573   | 0.03 | C_unshiu_00244 | 250760 | 257334 | 6575   | 2.19  | 99.97 |
| chr4 | 14522778 | 14526256 | 3479   | 0.02 | C_unshiu_00244 | 257852 | 261330 | 3479   | 1.16  | 99.94 |
| chr4 | 14526480 | 14528905 | 2426   | 0.01 | C_unshiu_00418 | 69960  | 72385  | 2426   | 1.11  | 100   |
| chr4 | 14528900 | 14547391 | 18492  | 0.09 | C_unshiu_00244 | 263127 | 281617 | 18491  | 6.16  | 99.99 |
| chr4 | 14547302 | 14558480 | 11179  | 0.05 | C_unshiu_00244 | 281583 | 292756 | 11174  | 3.72  | 99.91 |
| chr4 | 14566567 | 14568867 | 2301   | 0.01 | C_unshiu_00648 | 142898 | 145198 | 2301   | 1.46  | 100   |
| chr4 | 14568868 | 14581079 | 12212  | 0.06 | C_unshiu_01024 | 18374  | 6164   | 12211  | 11.81 | 99.98 |
| chr4 | 14587761 | 14589367 | 1607   | 0.01 | C_unshiu_00988 | 64709  | 63102  | 1608   | 1.49  | 98.76 |
| chr4 | 14605374 | 14612551 | 7178   | 0.03 | C_unshiu_00478 | 20004  | 27106  | 7103   | 3.58  | 98.37 |
| chr4 | 14607781 | 14613778 | 5998   | 0.03 | C_unshiu_00478 | 27110  | 33111  | 6002   | 3.02  | 99.87 |

|      |          |          |        |      |                |        |        |        |       |       |
|------|----------|----------|--------|------|----------------|--------|--------|--------|-------|-------|
| chr4 | 14613825 | 14669430 | 55606  | 0.27 | C_unshiu_00478 | 32607  | 88208  | 55602  | 28    | 99.96 |
| chr4 | 14649433 | 14699450 | 50018  | 0.24 | C_unshiu_00478 | 68223  | 118228 | 50006  | 25.18 | 99.97 |
| chr4 | 14698879 | 14707210 | 8332   | 0.04 | C_unshiu_00478 | 119574 | 127885 | 8312   | 4.19  | 99.29 |
| chr4 | 14707594 | 14708828 | 1235   | 0.01 | C_unshiu_00321 | 160933 | 162167 | 1235   | 0.48  | 100   |
| chr4 | 14708854 | 14729496 | 20643  | 0.1  | C_unshiu_00321 | 162533 | 183168 | 20636  | 8.07  | 99.9  |
| chr4 | 14730425 | 14812417 | 81993  | 0.39 | C_unshiu_00020 | 1      | 82023  | 82023  | 10.44 | 99.94 |
| chr4 | 14814003 | 14823362 | 9360   | 0.04 | C_unshiu_00020 | 84279  | 93650  | 9372   | 1.19  | 99.79 |
| chr4 | 14824720 | 15003195 | 178476 | 0.85 | C_unshiu_00020 | 95077  | 273487 | 178411 | 22.72 | 99.8  |
| chr4 | 15008657 | 15039436 | 30780  | 0.15 | C_unshiu_00020 | 281009 | 311775 | 30767  | 3.92  | 99.95 |
| chr4 | 15039273 | 15058433 | 19161  | 0.09 | C_unshiu_00020 | 311693 | 330769 | 19077  | 2.43  | 98.9  |
| chr4 | 15059719 | 15062489 | 2771   | 0.01 | C_unshiu_02157 | 23732  | 20962  | 2771   | 7.99  | 100   |
| chr4 | 15062482 | 15141347 | 78866  | 0.38 | C_unshiu_00020 | 334304 | 413151 | 78848  | 10.04 | 99.9  |
| chr4 | 15141789 | 15234831 | 93043  | 0.44 | C_unshiu_00020 | 414056 | 507119 | 93064  | 11.85 | 99.83 |
| chr4 | 15245461 | 15248747 | 3287   | 0.02 | C_unshiu_00556 | 82298  | 85570  | 3273   | 1.85  | 99.21 |
| chr4 | 15245614 | 15278656 | 33043  | 0.16 | C_unshiu_00556 | 82296  | 49554  | 32743  | 18.51 | 98.83 |
| chr4 | 15258618 | 15299271 | 40654  | 0.19 | C_unshiu_00556 | 69593  | 28897  | 40697  | 23.01 | 99.68 |
| chr4 | 15300789 | 15302736 | 1948   | 0.01 | C_unshiu_00556 | 27616  | 25666  | 1951   | 1.1   | 99.74 |
| chr4 | 15302737 | 15306796 | 4060   | 0.02 | C_unshiu_01104 | 21598  | 25656  | 4059   | 4.24  | 99.98 |
| chr4 | 15306801 | 15329052 | 22252  | 0.11 | C_unshiu_00556 | 22258  | 1      | 22258  | 12.59 | 99.93 |
| chr4 | 15329924 | 15351808 | 21885  | 0.1  | C_unshiu_00209 | 324556 | 302672 | 21885  | 6.64  | 99.96 |
| chr4 | 15353836 | 15396076 | 42241  | 0.2  | C_unshiu_00209 | 300861 | 258637 | 42225  | 12.81 | 99.94 |
| chr4 | 15395624 | 15429034 | 33411  | 0.16 | C_unshiu_00130 | 411126 | 377676 | 33451  | 8.11  | 99.29 |
| chr4 | 15429048 | 15448755 | 19708  | 0.09 | C_unshiu_00130 | 377252 | 357539 | 19714  | 4.78  | 99.96 |
| chr4 | 15449407 | 15510964 | 61558  | 0.29 | C_unshiu_00130 | 356340 | 294959 | 61382  | 14.89 | 99.49 |
| chr4 | 15513091 | 15622404 | 109314 | 0.52 | C_unshiu_00130 | 292039 | 182818 | 109222 | 26.49 | 99.9  |
| chr4 | 15624016 | 15625609 | 1594   | 0.01 | C_unshiu_00130 | 181433 | 179858 | 1576   | 0.38  | 98.31 |
| chr4 | 15627847 | 15635781 | 7935   | 0.04 | C_unshiu_00130 | 179299 | 171365 | 7935   | 1.92  | 100   |
| chr4 | 15641150 | 15677944 | 36795  | 0.18 | C_unshiu_00130 | 167611 | 130882 | 36730  | 8.91  | 99.2  |
| chr4 | 15677944 | 15769079 | 91136  | 0.44 | C_unshiu_00130 | 130764 | 39654  | 91111  | 22.1  | 99.92 |
| chr4 | 15773370 | 15804085 | 30716  | 0.15 | C_unshiu_00130 | 32482  | 1766   | 30717  | 7.45  | 99.99 |
| chr4 | 15808767 | 15873894 | 65128  | 0.31 | C_unshiu_00349 | 208106 | 142987 | 65120  | 26.78 | 99.94 |
| chr4 | 15873659 | 15929628 | 55970  | 0.27 | C_unshiu_00349 | 143142 | 87186  | 55957  | 23.01 | 99.91 |
| chr4 | 15930613 | 15932567 | 1955   | 0.01 | C_unshiu_01375 | 53353  | 51378  | 1976   | 2.73  | 98.43 |
| chr4 | 15937674 | 15940932 | 3259   | 0.02 | C_unshiu_02757 | 3173   | 6430   | 3258   | 17.23 | 99.51 |
| chr4 | 15940947 | 15943266 | 2320   | 0.01 | C_unshiu_02757 | 11273  | 13592  | 2320   | 12.27 | 99.78 |
| chr4 | 15947551 | 15950078 | 2528   | 0.01 | C_unshiu_02058 | 13798  | 16320  | 2523   | 6.58  | 98.26 |
| chr4 | 15959833 | 15966036 | 6204   | 0.03 | C_unshiu_00212 | 67466  | 61291  | 6176   | 1.89  | 98.66 |
| chr4 | 15973121 | 15975692 | 2572   | 0.01 | C_unshiu_00212 | 54391  | 51809  | 2583   | 0.79  | 98.45 |
| chr4 | 15982550 | 15983696 | 1147   | 0.01 | C_unshiu_01941 | 9872   | 8726   | 1147   | 2.66  | 98.69 |
| chr4 | 15985207 | 15986237 | 1031   | 0    | C_unshiu_01941 | 9903   | 8873   | 1031   | 2.39  | 99.81 |
| chr4 | 15987303 | 15992362 | 5060   | 0.02 | C_unshiu_01518 | 11176  | 6128   | 5049   | 8.1   | 98.29 |
| chr4 | 15992366 | 16002662 | 10297  | 0.05 | C_unshiu_01941 | 24120  | 13852  | 10269  | 23.85 | 98.36 |
| chr4 | 16002906 | 16005352 | 2447   | 0.01 | C_unshiu_01518 | 19330  | 16876  | 2455   | 3.94  | 99.47 |
| chr4 | 16005456 | 16006591 | 1136   | 0.01 | C_unshiu_01518 | 16490  | 15355  | 1136   | 1.82  | 99.74 |
| chr4 | 16008169 | 16011007 | 2839   | 0.01 | C_unshiu_00212 | 50261  | 47407  | 2855   | 0.87  | 99.09 |
| chr4 | 16013151 | 16014745 | 1595   | 0.01 | C_unshiu_00212 | 44203  | 42610  | 1594   | 0.49  | 99.56 |
| chr4 | 16030623 | 16036611 | 5989   | 0.03 | C_unshiu_00598 | 143222 | 149260 | 6039   | 3.59  | 98.59 |
| chr4 | 16038174 | 16044547 | 6374   | 0.03 | C_unshiu_00598 | 149567 | 155915 | 6349   | 3.78  | 98.02 |
| chr4 | 16044406 | 16048259 | 3854   | 0.02 | C_unshiu_00598 | 155911 | 159753 | 3843   | 2.29  | 99.2  |
| chr4 | 16048252 | 16056250 | 7999   | 0.04 | C_unshiu_00598 | 160161 | 168168 | 8008   | 4.76  | 98.84 |
| chr4 | 16063792 | 16066793 | 3002   | 0.01 | C_unshiu_00351 | 1      | 2992   | 2992   | 1.25  | 99.53 |
| chr4 | 16080752 | 16094022 | 13271  | 0.06 | C_unshiu_01857 | 6269   | 19540  | 13272  | 28.71 | 99.71 |
| chr4 | 16099185 | 16101459 | 2275   | 0.01 | C_unshiu_01511 | 33492  | 35767  | 2276   | 3.64  | 99.47 |
| chr4 | 16102754 | 16110467 | 7714   | 0.04 | C_unshiu_01857 | 28083  | 35777  | 7695   | 16.65 | 98.99 |
| chr4 | 16111486 | 16112787 | 1302   | 0.01 | C_unshiu_01857 | 37131  | 38432  | 1302   | 2.82  | 99.54 |
| chr4 | 16113173 | 16120815 | 7643   | 0.04 | C_unshiu_01857 | 38544  | 46188  | 7645   | 16.54 | 99.32 |
| chr4 | 16132719 | 16135370 | 2652   | 0.01 | C_unshiu_01117 | 85358  | 82703  | 2656   | 2.83  | 98.49 |
| chr4 | 16135360 | 16138628 | 3269   | 0.02 | C_unshiu_01117 | 82669  | 79419  | 3251   | 3.46  | 98.02 |
| chr4 | 16143631 | 16163542 | 19912  | 0.1  | C_unshiu_02244 | 12067  | 31898  | 19832  | 62.17 | 98.71 |
| chr4 | 16157975 | 16167836 | 9862   | 0.05 | C_unshiu_01117 | 1      | 9838   | 9838   | 10.46 | 99.09 |
| chr4 | 16167316 | 16169235 | 1920   | 0.01 | C_unshiu_01117 | 11237  | 13167  | 1931   | 2.05  | 99.07 |
| chr4 | 16169336 | 16176254 | 6919   | 0.03 | C_unshiu_01350 | 73470  | 66550  | 6921   | 9.33  | 99.97 |
| chr4 | 16177409 | 16181717 | 4309   | 0.02 | C_unshiu_01350 | 64942  | 60634  | 4309   | 5.81  | 99.77 |
| chr4 | 16183002 | 16187695 | 4694   | 0.02 | C_unshiu_01350 | 58930  | 54237  | 4694   | 6.33  | 99.94 |
| chr4 | 16188026 | 16189623 | 1598   | 0.01 | C_unshiu_01350 | 53549  | 51952  | 1598   | 2.16  | 100   |
| chr4 | 16190037 | 16197977 | 7941   | 0.04 | C_unshiu_01350 | 50400  | 42459  | 7942   | 10.71 | 99.96 |
| chr4 | 16205475 | 16207369 | 1895   | 0.01 | C_unshiu_00233 | 242998 | 241107 | 1892   | 0.62  | 98.73 |
| chr4 | 16207391 | 16304042 | 96652  | 0.46 | C_unshiu_00233 | 240797 | 144146 | 96652  | 31.61 | 99.97 |
| chr4 | 16305660 | 16308894 | 25235  | 0.12 | C_unshiu_00233 | 141860 | 116668 | 25193  | 8.24  | 99.83 |
| chr4 | 16310892 | 16360001 | 49110  | 0.23 | C_unshiu_00233 | 136628 | 87745  | 48884  | 15.99 | 99.18 |
| chr4 | 16359745 | 16387653 | 27909  | 0.13 | C_unshiu_00039 | 152868 | 180771 | 27904  | 4.23  | 99.64 |
| chr4 | 16367652 | 16390780 | 23129  | 0.11 | C_unshiu_00039 | 160783 | 183898 | 23116  | 3.5   | 99.78 |
| chr4 | 16390278 | 16453818 | 63541  | 0.3  | C_unshiu_00039 | 188249 | 251850 | 63602  | 9.63  | 99.88 |
| chr4 | 16457078 | 16523529 | 66452  | 0.32 | C_unshiu_00039 | 256333 | 322770 | 66438  | 10.06 | 99.93 |
| chr4 | 16523664 | 16528374 | 4711   | 0.02 | C_unshiu_00039 | 323391 | 328130 | 4740   | 0.72  | 98.74 |
| chr4 | 16537745 | 16577609 | 39865  | 0.19 | C_unshiu_00039 | 327829 | 367665 | 39837  | 6.03  | 99.65 |
| chr4 | 16578502 | 16579542 | 1041   | 0    | C_unshiu_00272 | 92316  | 93356  | 1041   | 0.37  | 100   |
| chr4 | 16579534 | 16584610 | 5077   | 0.02 | C_unshiu_00039 | 372455 | 377532 | 5078   | 0.77  | 99.9  |
| chr4 | 16586674 | 16661816 | 75143  | 0.36 | C_unshiu_00039 | 378756 | 453856 | 75101  | 11.38 | 99.9  |

|      |          |          |        |      |                |         |         |        |       |       |
|------|----------|----------|--------|------|----------------|---------|---------|--------|-------|-------|
| chr4 | 16641817 | 16784223 | 142407 | 0.68 | C_unshiu_00039 | 433875  | 576302  | 142428 | 21.57 | 99.95 |
| chr4 | 16764197 | 16813952 | 49756  | 0.24 | C_unshiu_00039 | 556248  | 606005  | 49758  | 7.54  | 99.89 |
| chr4 | 16793955 | 16834446 | 40492  | 0.19 | C_unshiu_00039 | 586034  | 626493  | 40460  | 6.13  | 99.88 |
| chr4 | 16834769 | 16867282 | 32514  | 0.16 | C_unshiu_00039 | 627680  | 660191  | 32512  | 4.92  | 99.98 |
| chr4 | 16863920 | 16916532 | 52613  | 0.25 | C_unshiu_00967 | 109933  | 57334   | 52600  | 47.85 | 99.97 |
| chr4 | 16896528 | 16960934 | 64407  | 0.31 | C_unshiu_00967 | 77332   | 12932   | 64401  | 58.58 | 99.99 |
| chr4 | 16960983 | 16966455 | 5473   | 0.03 | C_unshiu_00967 | 12630   | 7124    | 5507   | 5.01  | 98.73 |
| chr4 | 16965902 | 17007495 | 41594  | 0.2  | C_unshiu_00099 | 3833    | 45544   | 41712  | 9.1   | 99.57 |
| chr4 | 17009426 | 17012514 | 3089   | 0.01 | C_unshiu_00099 | 47608   | 50697   | 3090   | 0.67  | 99.77 |
| chr4 | 17011954 | 17058975 | 47022  | 0.22 | C_unshiu_00099 | 55251   | 102291  | 47041  | 10.26 | 99.83 |
| chr4 | 17059615 | 17139965 | 80351  | 0.38 | C_unshiu_00099 | 102326  | 182722  | 80397  | 17.54 | 99.91 |
| chr4 | 17139988 | 17193900 | 53913  | 0.26 | C_unshiu_00099 | 184461  | 238396  | 53936  | 11.77 | 99.96 |
| chr4 | 17173884 | 17219642 | 45759  | 0.22 | C_unshiu_00099 | 218365  | 264077  | 45713  | 9.97  | 99.61 |
| chr4 | 17219667 | 17236450 | 16784  | 0.08 | C_unshiu_00099 | 264063  | 280871  | 16809  | 3.67  | 99.8  |
| chr4 | 17241666 | 17285010 | 43345  | 0.21 | C_unshiu_00099 | 289545  | 332871  | 43327  | 9.45  | 99.96 |
| chr4 | 17291318 | 17366550 | 75233  | 0.36 | C_unshiu_00004 | 1099788 | 1024516 | 75273  | 6.41  | 99.92 |
| chr4 | 17366684 | 17528071 | 161388 | 0.77 | C_unshiu_00004 | 1024114 | 862745  | 161370 | 13.74 | 99.88 |
| chr4 | 17514024 | 17528326 | 14303  | 0.07 | C_unshiu_00004 | 876812  | 862490  | 14323  | 1.22  | 99.86 |
| chr4 | 17528327 | 17637674 | 109348 | 0.52 | C_unshiu_00004 | 862554  | 753223  | 109332 | 9.31  | 99.94 |
| chr4 | 17637656 | 17797675 | 160020 | 0.76 | C_unshiu_00004 | 753141  | 593147  | 159995 | 13.63 | 99.96 |
| chr4 | 17777676 | 17809141 | 31466  | 0.15 | C_unshiu_00004 | 613130  | 581679  | 31452  | 2.68  | 99.92 |
| chr4 | 17809141 | 17820711 | 11571  | 0.06 | C_unshiu_00004 | 581582  | 570012  | 11571  | 0.99  | 99.99 |
| chr4 | 17820785 | 17851787 | 31003  | 0.15 | C_unshiu_00004 | 570017  | 539040  | 30978  | 2.64  | 99.66 |
| chr4 | 17851899 | 17854993 | 3095   | 0.01 | C_unshiu_00004 | 538577  | 535484  | 3094   | 0.26  | 99.52 |
| chr4 | 17856998 | 17897244 | 40247  | 0.19 | C_unshiu_00004 | 534415  | 494142  | 40274  | 3.43  | 99.62 |
| chr4 | 17898326 | 17949459 | 51134  | 0.24 | C_unshiu_00004 | 498339  | 442685  | 51155  | 4.36  | 99.56 |
| chr4 | 17951126 | 17960240 | 9115   | 0.04 | C_unshiu_00004 | 442161  | 433045  | 9117   | 0.78  | 99.71 |
| chr4 | 17960524 | 17978606 | 18083  | 0.09 | C_unshiu_00004 | 432372  | 414244  | 18129  | 1.54  | 99.05 |
| chr4 | 17983004 | 18004140 | 21137  | 0.1  | C_unshiu_00004 | 414728  | 393626  | 21103  | 1.8   | 99.21 |
| chr4 | 18004885 | 18009961 | 5077   | 0.02 | C_unshiu_00004 | 392762  | 387685  | 5078   | 0.43  | 99.51 |
| chr4 | 18010738 | 18021503 | 10766  | 0.05 | C_unshiu_00004 | 387025  | 376228  | 10798  | 0.92  | 98.96 |
| chr4 | 18022950 | 18024881 | 1932   | 0.01 | C_unshiu_00004 | 375866  | 373915  | 1952   | 0.17  | 98.62 |
| chr4 | 18025383 | 18026654 | 1272   | 0.01 | C_unshiu_00008 | 556974  | 555702  | 1273   | 0.12  | 98.35 |
| chr4 | 18032464 | 18051676 | 19213  | 0.09 | C_unshiu_00004 | 369996  | 350742  | 19255  | 1.64  | 99.13 |
| chr4 | 18051660 | 18067973 | 16314  | 0.08 | C_unshiu_00004 | 350313  | 333996  | 16318  | 1.39  | 99.56 |
| chr4 | 18069668 | 18071431 | 1764   | 0.01 | C_unshiu_00004 | 331855  | 330092  | 1764   | 0.15  | 99.72 |
| chr4 | 18071469 | 18085455 | 13987  | 0.07 | C_unshiu_00004 | 330094  | 316074  | 14021  | 1.19  | 99.2  |
| chr4 | 18086587 | 18118340 | 31754  | 0.15 | C_unshiu_00004 | 316087  | 284308  | 31780  | 2.71  | 99.69 |
| chr4 | 18118976 | 18157138 | 38163  | 0.18 | C_unshiu_00004 | 283420  | 245177  | 38244  | 3.26  | 99.38 |
| chr4 | 18157130 | 18166230 | 9101   | 0.04 | C_unshiu_00004 | 244746  | 235611  | 9136   | 0.78  | 98.88 |
| chr4 | 18166518 | 18216998 | 50481  | 0.24 | C_unshiu_00004 | 233958  | 183482  | 50477  | 4.3   | 99.2  |
| chr4 | 18217069 | 18256769 | 39701  | 0.19 | C_unshiu_00004 | 183385  | 143725  | 39661  | 3.38  | 99.24 |
| chr4 | 18256761 | 18269973 | 13213  | 0.06 | C_unshiu_00004 | 142908  | 129649  | 13260  | 1.13  | 99.07 |
| chr4 | 18270670 | 18287939 | 17270  | 0.08 | C_unshiu_00004 | 127890  | 110578  | 17313  | 1.47  | 99.28 |
| chr4 | 18288244 | 18329988 | 41745  | 0.2  | C_unshiu_00004 | 110581  | 68794   | 41788  | 3.56  | 98.97 |
| chr4 | 18330470 | 18333888 | 3419   | 0.02 | C_unshiu_00004 | 67733   | 64272   | 3462   | 0.29  | 98.27 |
| chr4 | 18339651 | 18363384 | 23734  | 0.11 | C_unshiu_00004 | 63445   | 39624   | 23822  | 2.03  | 99.17 |
| chr4 | 18363384 | 18407753 | 44370  | 0.21 | C_unshiu_00001 | 50228   | 94565   | 44338  | 1.66  | 98.39 |
| chr4 | 18408671 | 18425576 | 16906  | 0.08 | C_unshiu_00001 | 95695   | 112592  | 16898  | 0.63  | 99.11 |
| chr4 | 18433418 | 18439614 | 6197   | 0.03 | C_unshiu_00001 | 127006  | 133214  | 6209   | 0.23  | 98.94 |
| chr4 | 18442529 | 18446069 | 3541   | 0.02 | C_unshiu_00001 | 134978  | 138531  | 3554   | 0.13  | 99.24 |
| chr4 | 18447628 | 18465301 | 17674  | 0.08 | C_unshiu_00001 | 138728  | 156492  | 17765  | 0.66  | 98.2  |
| chr4 | 18463465 | 18465365 | 1901   | 0.01 | C_unshiu_03023 | 12317   | 10416   | 1902   | 15.44 | 99.63 |
| chr4 | 18468085 | 18470744 | 2660   | 0.01 | C_unshiu_03023 | 2964    | 305     | 2660   | 21.6  | 99.02 |
| chr4 | 18468098 | 18484835 | 16738  | 0.08 | C_unshiu_00001 | 159568  | 176306  | 16739  | 0.63  | 99.22 |
| chr4 | 18485609 | 18500912 | 15304  | 0.07 | C_unshiu_00001 | 176295  | 191693  | 15399  | 0.58  | 98.37 |
| chr4 | 18500904 | 18506235 | 5332   | 0.03 | C_unshiu_00001 | 191976  | 197315  | 5340   | 0.2   | 99.16 |
| chr4 | 18506281 | 18523053 | 16773  | 0.08 | C_unshiu_00001 | 197866  | 214720  | 16855  | 0.63  | 98.42 |
| chr4 | 18525465 | 18531362 | 5898   | 0.03 | C_unshiu_00001 | 214830  | 220731  | 5902   | 0.22  | 99.61 |
| chr4 | 18532379 | 18544339 | 11961  | 0.06 | C_unshiu_00001 | 222232  | 234218  | 11987  | 0.45  | 99.42 |
| chr4 | 18544239 | 18545405 | 1167   | 0.01 | C_unshiu_00001 | 234218  | 235387  | 1170   | 0.04  | 99.74 |
| chr4 | 18551086 | 18563730 | 12645  | 0.06 | C_unshiu_00001 | 240754  | 253509  | 12756  | 0.48  | 98.34 |
| chr4 | 18563752 | 18587826 | 24075  | 0.12 | C_unshiu_00001 | 253939  | 278011  | 24073  | 0.9   | 99.11 |
| chr4 | 18589995 | 18652995 | 63001  | 0.3  | C_unshiu_00001 | 279634  | 342677  | 63044  | 2.36  | 99.38 |
| chr4 | 18655814 | 18656925 | 1112   | 0.01 | C_unshiu_00001 | 344642  | 345756  | 1115   | 0.04  | 98.3  |
| chr4 | 18656936 | 18663865 | 6930   | 0.03 | C_unshiu_00001 | 346309  | 353223  | 6915   | 0.26  | 99.61 |
| chr4 | 18664061 | 18697827 | 33767  | 0.16 | C_unshiu_00001 | 353464  | 387269  | 33806  | 1.26  | 99.29 |
| chr4 | 18697827 | 18706505 | 8679   | 0.04 | C_unshiu_00001 | 387411  | 396089  | 8679   | 0.32  | 99.18 |
| chr4 | 18724507 | 18732498 | 7992   | 0.04 | C_unshiu_00001 | 413992  | 421994  | 8003   | 0.3   | 99.33 |
| chr4 | 18731888 | 18735538 | 3651   | 0.02 | C_unshiu_00088 | 414644  | 418294  | 3651   | 0.78  | 99.78 |
| chr4 | 18735551 | 18754251 | 18701  | 0.09 | C_unshiu_00001 | 421625  | 440369  | 18745  | 0.7   | 99.42 |
| chr4 | 18754567 | 18772212 | 17646  | 0.08 | C_unshiu_00001 | 440356  | 458031  | 17676  | 0.66  | 99.65 |
| chr4 | 18773491 | 18780363 | 6873   | 0.03 | C_unshiu_00001 | 460026  | 466899  | 6874   | 0.26  | 99.36 |
| chr4 | 18780974 | 18782258 | 1285   | 0.01 | C_unshiu_00001 | 468331  | 469619  | 1289   | 0.05  | 99.38 |
| chr4 | 18782254 | 18814103 | 31850  | 0.15 | C_unshiu_00001 | 470067  | 501992  | 31926  | 1.19  | 99.32 |
| chr4 | 18817081 | 18864540 | 47460  | 0.23 | C_unshiu_00001 | 505541  | 553143  | 47603  | 1.78  | 99.36 |
| chr4 | 18865332 | 18893871 | 28540  | 0.14 | C_unshiu_00001 | 554547  | 583146  | 28600  | 1.07  | 99.53 |
| chr4 | 18893873 | 18918486 | 24614  | 0.12 | C_unshiu_00001 | 583265  | 607899  | 24635  | 0.92  | 99.54 |
| chr4 | 18918525 | 18940470 | 21946  | 0.1  | C_unshiu_00001 | 607078  | 629070  | 21993  | 0.82  | 99.48 |

|      |          |          |        |      |                |         |         |        |       |       |
|------|----------|----------|--------|------|----------------|---------|---------|--------|-------|-------|
| chr4 | 18942785 | 18948918 | 6134   | 0.03 | C_unshiu_00001 | 632156  | 638266  | 6111   | 0.23  | 98.57 |
| chr4 | 18950365 | 18952493 | 2129   | 0.01 | C_unshiu_00001 | 639123  | 641236  | 2114   | 0.08  | 98.17 |
| chr4 | 18954912 | 18975719 | 20808  | 0.1  | C_unshiu_00001 | 643787  | 664628  | 20842  | 0.78  | 99.55 |
| chr4 | 18975978 | 18992110 | 16133  | 0.08 | C_unshiu_00001 | 665023  | 681185  | 16163  | 0.6   | 99.57 |
| chr4 | 18994480 | 19046160 | 51681  | 0.25 | C_unshiu_00001 | 682348  | 734106  | 51759  | 1.94  | 99.05 |
| chr4 | 19046195 | 19050732 | 4538   | 0.02 | C_unshiu_00001 | 734527  | 739082  | 4556   | 0.17  | 99.43 |
| chr4 | 19051414 | 19054995 | 3582   | 0.02 | C_unshiu_00001 | 739810  | 743406  | 3597   | 0.13  | 98.86 |
| chr4 | 19055236 | 19065380 | 10145  | 0.05 | C_unshiu_00001 | 743800  | 753984  | 10185  | 0.38  | 98.31 |
| chr4 | 19065938 | 19077222 | 11285  | 0.05 | C_unshiu_00001 | 754664  | 765956  | 11293  | 0.42  | 99.58 |
| chr4 | 19076849 | 19111619 | 34771  | 0.17 | C_unshiu_00001 | 765769  | 800582  | 34814  | 1.3   | 99.28 |
| chr4 | 19111443 | 19124796 | 13354  | 0.06 | C_unshiu_00001 | 800582  | 814020  | 13439  | 0.5   | 98.23 |
| chr4 | 19124796 | 19136911 | 12116  | 0.06 | C_unshiu_00001 | 814228  | 826342  | 12115  | 0.45  | 99.41 |
| chr4 | 19137392 | 19145844 | 8453   | 0.04 | C_unshiu_00001 | 826803  | 835262  | 8460   | 0.32  | 99.69 |
| chr4 | 19146692 | 19157478 | 10787  | 0.05 | C_unshiu_00001 | 841867  | 852735  | 10869  | 0.41  | 98.23 |
| chr4 | 19157793 | 19175506 | 17714  | 0.08 | C_unshiu_00001 | 853025  | 870792  | 17768  | 0.66  | 99.52 |
| chr4 | 19179603 | 19202611 | 23009  | 0.11 | C_unshiu_00001 | 878002  | 901046  | 23045  | 0.86  | 99.21 |
| chr4 | 19202733 | 19245861 | 43129  | 0.21 | C_unshiu_00001 | 901029  | 944230  | 43202  | 1.62  | 98.77 |
| chr4 | 19248262 | 19255858 | 7597   | 0.04 | C_unshiu_00001 | 945758  | 953347  | 7590   | 0.28  | 99.37 |
| chr4 | 19255849 | 19261523 | 5675   | 0.03 | C_unshiu_00001 | 954284  | 959961  | 5678   | 0.21  | 99.52 |
| chr4 | 19261727 | 19271661 | 9935   | 0.05 | C_unshiu_00001 | 960227  | 970161  | 9935   | 0.37  | 99.37 |
| chr4 | 19272845 | 19277221 | 4377   | 0.02 | C_unshiu_03123 | 4936    | 575     | 4362   | 52.73 | 99.25 |
| chr4 | 19283911 | 19299576 | 15666  | 0.07 | C_unshiu_00001 | 983984  | 999640  | 15657  | 0.59  | 98.26 |
| chr4 | 19303245 | 19311613 | 8369   | 0.04 | C_unshiu_00001 | 1001699 | 1010131 | 8433   | 0.32  | 98.68 |
| chr4 | 19311611 | 19341687 | 30077  | 0.14 | C_unshiu_00001 | 1010187 | 1040305 | 30119  | 1.13  | 99.39 |
| chr4 | 19341688 | 19345770 | 4083   | 0.02 | C_unshiu_00001 | 1040410 | 1044516 | 4107   | 0.15  | 99.17 |
| chr4 | 19345763 | 19392991 | 47229  | 0.23 | C_unshiu_00001 | 1044721 | 1091993 | 47273  | 1.77  | 98.96 |
| chr4 | 19392956 | 19396189 | 3234   | 0.02 | C_unshiu_00001 | 1092662 | 1095909 | 3248   | 0.12  | 99.23 |
| chr4 | 19397007 | 19398515 | 1509   | 0.01 | C_unshiu_00001 | 1097260 | 1098770 | 1511   | 0.06  | 99.87 |
| chr4 | 19398799 | 19417198 | 18400  | 0.09 | C_unshiu_00001 | 1099605 | 1118017 | 18413  | 0.69  | 99.2  |
| chr4 | 19417198 | 19421655 | 4458   | 0.02 | C_unshiu_00001 | 1118170 | 1122625 | 4456   | 0.17  | 99.93 |
| chr4 | 19421653 | 19429470 | 7818   | 0.04 | C_unshiu_00001 | 1122708 | 1130527 | 7820   | 0.29  | 99.82 |
| chr4 | 19430844 | 19453711 | 22868  | 0.11 | C_unshiu_00001 | 1141712 | 1164669 | 22958  | 0.86  | 98.99 |
| chr4 | 19454157 | 19458830 | 4674   | 0.02 | C_unshiu_00001 | 1164661 | 1169335 | 4675   | 0.17  | 99.79 |
| chr4 | 19459024 | 19460521 | 1498   | 0.01 | C_unshiu_00001 | 1169519 | 1171016 | 1498   | 0.06  | 99.87 |
| chr4 | 19474162 | 19475188 | 1027   | 0    | C_unshiu_00001 | 1185127 | 1186153 | 1027   | 0.04  | 99.71 |
| chr4 | 19475239 | 19476558 | 1320   | 0.01 | C_unshiu_00001 | 1186082 | 1187401 | 1320   | 0.05  | 99.92 |
| chr4 | 19479965 | 19487694 | 7730   | 0.04 | C_unshiu_00001 | 1193521 | 1201253 | 7733   | 0.29  | 99.56 |
| chr4 | 19487893 | 19517062 | 29170  | 0.14 | C_unshiu_00001 | 1201240 | 1230434 | 29195  | 1.09  | 99.41 |
| chr4 | 19517061 | 19557645 | 40585  | 0.19 | C_unshiu_00001 | 1230383 | 1270990 | 40608  | 1.52  | 99.29 |
| chr4 | 19557646 | 19564693 | 7048   | 0.03 | C_unshiu_00001 | 1271187 | 1278236 | 7050   | 0.26  | 99.12 |
| chr4 | 19564861 | 19635766 | 70906  | 0.34 | C_unshiu_00001 | 1278236 | 1349182 | 70947  | 2.65  | 99.54 |
| chr4 | 19640809 | 19642308 | 1500   | 0.01 | C_unshiu_00001 | 1349286 | 1350806 | 1521   | 0.06  | 98.29 |
| chr4 | 19642613 | 19648821 | 6209   | 0.03 | C_unshiu_00001 | 1351085 | 1357333 | 6249   | 0.23  | 98.05 |
| chr4 | 19649051 | 19682575 | 33525  | 0.16 | C_unshiu_00001 | 1357567 | 1391099 | 33533  | 1.25  | 99.03 |
| chr4 | 19682568 | 19697751 | 15184  | 0.07 | C_unshiu_00001 | 1391191 | 1406282 | 15092  | 0.56  | 98.53 |
| chr4 | 19697750 | 19745458 | 47709  | 0.23 | C_unshiu_00001 | 1406545 | 1454480 | 47936  | 1.79  | 98.96 |
| chr4 | 19747066 | 19763507 | 16442  | 0.08 | C_unshiu_00001 | 1460543 | 1477025 | 16483  | 0.62  | 98.96 |
| chr4 | 19763517 | 19770504 | 6988   | 0.03 | C_unshiu_00001 | 1478227 | 1485317 | 7091   | 0.27  | 98.04 |
| chr4 | 19774289 | 19778474 | 4186   | 0.02 | C_unshiu_00001 | 1489313 | 1493510 | 4198   | 0.16  | 99.48 |
| chr4 | 19794900 | 19799603 | 4704   | 0.02 | C_unshiu_00001 | 1511081 | 1515797 | 4717   | 0.18  | 98.56 |
| chr4 | 19799955 | 19806933 | 6979   | 0.03 | C_unshiu_00001 | 1515792 | 1522738 | 6947   | 0.26  | 98.9  |
| chr4 | 19806957 | 19810755 | 3799   | 0.02 | C_unshiu_00001 | 1522905 | 1526707 | 3803   | 0.14  | 99.55 |
| chr4 | 19811486 | 19845987 | 34502  | 0.16 | C_unshiu_00001 | 1527066 | 1561548 | 34483  | 1.29  | 99.41 |
| chr4 | 19846745 | 19855391 | 8647   | 0.04 | C_unshiu_00001 | 1561533 | 1570198 | 8666   | 0.32  | 98.93 |
| chr4 | 19855405 | 19881890 | 26486  | 0.13 | C_unshiu_00001 | 1570174 | 1596687 | 26514  | 0.99  | 99.44 |
| chr4 | 19882346 | 19894359 | 12014  | 0.06 | C_unshiu_00001 | 1597506 | 1609521 | 12016  | 0.45  | 99.28 |
| chr4 | 19895233 | 19896338 | 1106   | 0.01 | C_unshiu_00001 | 1609510 | 1610614 | 1105   | 0.04  | 98.19 |
| chr4 | 19898599 | 19908523 | 9925   | 0.05 | C_unshiu_00001 | 1610637 | 1620561 | 9925   | 0.37  | 99.46 |
| chr4 | 19908603 | 19931180 | 22578  | 0.11 | C_unshiu_00001 | 1620975 | 1643646 | 22672  | 0.85  | 99    |
| chr4 | 19931378 | 19941235 | 9858   | 0.05 | C_unshiu_00001 | 1643911 | 1653777 | 9867   | 0.37  | 99.53 |
| chr4 | 19941254 | 20067656 | 126403 | 0.6  | C_unshiu_00001 | 1654173 | 1780640 | 126468 | 4.73  | 99.26 |
| chr4 | 20067653 | 20071589 | 3937   | 0.02 | C_unshiu_00001 | 1780530 | 1784472 | 3943   | 0.15  | 99.11 |
| chr4 | 20072164 | 20077954 | 5791   | 0.03 | C_unshiu_00001 | 1785048 | 1790834 | 5787   | 0.22  | 98.95 |
| chr4 | 20081261 | 20086045 | 4785   | 0.02 | C_unshiu_00001 | 1793675 | 1798467 | 4793   | 0.18  | 99.69 |
| chr4 | 20090214 | 20108351 | 18138  | 0.09 | C_unshiu_00001 | 1803593 | 1821793 | 18201  | 0.68  | 98.31 |
| chr4 | 20111043 | 20115822 | 4780   | 0.02 | C_unshiu_00001 | 1824302 | 1829087 | 4786   | 0.18  | 99.37 |
| chr4 | 20116075 | 20130325 | 14251  | 0.07 | C_unshiu_00001 | 1829474 | 1843770 | 14297  | 0.53  | 99.45 |
| chr4 | 20130938 | 20134453 | 3516   | 0.02 | C_unshiu_00001 | 1843759 | 1847274 | 3516   | 0.13  | 99.94 |
| chr4 | 20134453 | 20135512 | 1060   | 0.01 | C_unshiu_00001 | 1858894 | 1859954 | 1061   | 0.04  | 99.91 |
| chr4 | 20137870 | 20141627 | 3758   | 0.02 | C_unshiu_00001 | 1852009 | 1855768 | 3760   | 0.14  | 99.65 |
| chr4 | 20142311 | 20143475 | 1165   | 0.01 | C_unshiu_00001 | 1856562 | 1857731 | 1170   | 0.04  | 99.06 |
| chr4 | 20147367 | 20149611 | 2245   | 0.01 | C_unshiu_00001 | 1864971 | 1867220 | 2250   | 0.08  | 99.56 |
| chr4 | 20157204 | 20159780 | 2577   | 0.01 | C_unshiu_00001 | 1871911 | 1874488 | 2578   | 0.1   | 99.96 |
| chr4 | 20159814 | 20172793 | 12980  | 0.06 | C_unshiu_00001 | 1874487 | 1887532 | 13046  | 0.49  | 99.07 |
| chr4 | 20176030 | 20229398 | 53369  | 0.25 | C_unshiu_00001 | 1889673 | 1943003 | 53331  | 1.99  | 99.14 |
| chr4 | 20229382 | 20235382 | 6001   | 0.03 | C_unshiu_00001 | 1943330 | 1949401 | 6072   | 0.23  | 98.17 |
| chr4 | 20235365 | 20250974 | 15610  | 0.07 | C_unshiu_00001 | 1949490 | 1965158 | 15669  | 0.59  | 99.23 |
| chr4 | 20251390 | 20282836 | 31447  | 0.15 | C_unshiu_00001 | 1966008 | 1997533 | 31526  | 1.18  | 99.1  |
| chr4 | 20283359 | 20288012 | 4654   | 0.02 | C_unshiu_00001 | 1998647 | 2003294 | 4648   | 0.17  | 99.08 |

|      |          |          |        |      |                |         |         |        |       |       |
|------|----------|----------|--------|------|----------------|---------|---------|--------|-------|-------|
| chr4 | 20288653 | 20300070 | 11418  | 0.05 | C_unshiu_00001 | 2003285 | 2014737 | 11453  | 0.43  | 98.57 |
| chr4 | 20300068 | 20305839 | 5772   | 0.03 | C_unshiu_00001 | 2014824 | 2020620 | 5797   | 0.22  | 98.59 |
| chr4 | 20306233 | 20475287 | 169055 | 0.81 | C_unshiu_00001 | 2020984 | 2190070 | 169087 | 6.32  | 99.91 |
| chr4 | 20475291 | 20488767 | 13477  | 0.06 | C_unshiu_00001 | 2190199 | 2203675 | 13477  | 0.5   | 99.99 |
| chr4 | 20488109 | 20601668 | 113560 | 0.54 | C_unshiu_00001 | 2207759 | 2321346 | 113588 | 4.25  | 99.95 |
| chr4 | 20601673 | 20633766 | 32094  | 0.15 | C_unshiu_00001 | 2321726 | 2353811 | 32086  | 1.2   | 99.38 |
| chr4 | 20633766 | 20638703 | 4938   | 0.02 | C_unshiu_00001 | 2353923 | 2358929 | 5007   | 0.19  | 98.18 |
| chr4 | 20639377 | 20647611 | 8235   | 0.04 | C_unshiu_00001 | 2359448 | 2367663 | 8216   | 0.31  | 98.22 |
| chr4 | 20648264 | 20649301 | 1038   | 0    | C_unshiu_00001 | 2368686 | 2369723 | 1038   | 0.04  | 99.9  |
| chr4 | 20652416 | 20654303 | 1888   | 0.01 | C_unshiu_00001 | 2366442 | 2368328 | 1887   | 0.07  | 99.95 |
| chr4 | 20655124 | 20657266 | 2143   | 0.01 | C_unshiu_02391 | 8669    | 10793   | 2125   | 7.74  | 98.04 |
| chr4 | 20655227 | 20657266 | 2040   | 0.01 | C_unshiu_00001 | 2369707 | 2371775 | 2069   | 0.08  | 98.16 |
| chr4 | 20658290 | 20673748 | 15459  | 0.07 | C_unshiu_00001 | 2372590 | 2388054 | 15465  | 0.58  | 99.11 |
| chr4 | 20673814 | 20718426 | 44613  | 0.21 | C_unshiu_00001 | 2388335 | 2432895 | 44561  | 1.67  | 98.83 |
| chr4 | 20720405 | 20726509 | 6105   | 0.03 | C_unshiu_00001 | 2435881 | 2442038 | 6158   | 0.23  | 98.61 |
| chr4 | 20728465 | 20730751 | 2287   | 0.01 | C_unshiu_00001 | 2444951 | 2447232 | 2282   | 0.09  | 99.13 |
| chr4 | 20736522 | 20748551 | 12030  | 0.06 | C_unshiu_00001 | 2455412 | 2467425 | 12014  | 0.45  | 98.61 |
| chr4 | 20748549 | 20794339 | 45791  | 0.22 | C_unshiu_00001 | 2468337 | 2514264 | 45928  | 1.72  | 99.35 |
| chr4 | 20794325 | 20800193 | 5869   | 0.03 | C_unshiu_00001 | 2514393 | 2520254 | 5862   | 0.22  | 98.98 |
| chr4 | 20800145 | 20815316 | 15172  | 0.07 | C_unshiu_00001 | 2520266 | 2535454 | 15189  | 0.57  | 99.55 |
| chr4 | 20816660 | 20819064 | 2405   | 0.01 | C_unshiu_00001 | 2535458 | 2537885 | 2428   | 0.09  | 98.64 |
| chr4 | 20819663 | 20828682 | 9020   | 0.04 | C_unshiu_00001 | 2537880 | 2546917 | 9038   | 0.34  | 99.66 |
| chr4 | 20830980 | 20835975 | 4996   | 0.02 | C_unshiu_00001 | 2549583 | 2554578 | 4996   | 0.19  | 99.94 |
| chr4 | 20835970 | 20842335 | 6366   | 0.03 | C_unshiu_00001 | 2555976 | 2562374 | 6399   | 0.24  | 98.72 |
| chr4 | 20846791 | 20849871 | 3081   | 0.01 | C_unshiu_02898 | 15748   | 12667   | 3082   | 19.57 | 99.87 |
| chr4 | 20849926 | 20853031 | 3106   | 0.01 | C_unshiu_00001 | 2570930 | 2574033 | 3104   | 0.12  | 99.23 |
| chr4 | 20849982 | 20853043 | 3062   | 0.01 | C_unshiu_02898 | 12671   | 9610    | 3062   | 19.44 | 99.38 |
| chr4 | 20854415 | 20861846 | 7432   | 0.04 | C_unshiu_02898 | 9699    | 2306    | 7394   | 46.95 | 99.07 |
| chr4 | 20865623 | 20883894 | 18272  | 0.09 | C_unshiu_01273 | 77208   | 58877   | 18332  | 23.09 | 98.93 |
| chr4 | 20882563 | 20899584 | 17022  | 0.08 | C_unshiu_02516 | 24150   | 7120    | 17031  | 70.52 | 99.16 |
| chr4 | 20901774 | 20907357 | 5584   | 0.03 | C_unshiu_02516 | 6925    | 1342    | 5584   | 23.12 | 99.95 |
| chr4 | 20911451 | 20922731 | 11281  | 0.05 | C_unshiu_01273 | 31081   | 19704   | 11378  | 14.33 | 98.02 |
| chr5 | 2762     | 32822    | 30061  | 0.17 | C_unshiu_00159 | 99447   | 69382   | 30066  | 8.05  | 99.93 |
| chr5 | 41087    | 42736    | 1650   | 0.01 | C_unshiu_00159 | 69382   | 67733   | 1650   | 0.44  | 100   |
| chr5 | 42746    | 105659   | 62914  | 0.35 | C_unshiu_00159 | 67312   | 4401    | 62912  | 16.84 | 99.97 |
| chr5 | 103003   | 105681   | 2679   | 0.02 | C_unshiu_00344 | 211405  | 214082  | 2678   | 1.08  | 98.21 |
| chr5 | 106487   | 107843   | 1357   | 0.01 | C_unshiu_00760 | 10940   | 9582    | 1359   | 1.01  | 98.6  |
| chr5 | 120840   | 128405   | 7566   | 0.04 | C_unshiu_00449 | 21980   | 29607   | 7628   | 3.66  | 98.42 |
| chr5 | 128387   | 142008   | 13622  | 0.08 | C_unshiu_00449 | 29824   | 43454   | 13631  | 6.54  | 99.92 |
| chr5 | 131979   | 150990   | 19012  | 0.11 | C_unshiu_00449 | 33425   | 52472   | 19048  | 9.13  | 99.8  |
| chr5 | 150872   | 162186   | 11315  | 0.06 | C_unshiu_00449 | 52774   | 64131   | 11358  | 5.45  | 99.37 |
| chr5 | 166560   | 209343   | 42784  | 0.24 | C_unshiu_00449 | 63411   | 106209  | 42799  | 20.52 | 99.89 |
| chr5 | 213675   | 242211   | 28537  | 0.16 | C_unshiu_00449 | 110112  | 138622  | 28511  | 13.67 | 99.74 |
| chr5 | 244433   | 248784   | 4352   | 0.02 | C_unshiu_00449 | 140208  | 144559  | 4352   | 2.09  | 100   |
| chr5 | 248785   | 251813   | 3029   | 0.02 | C_unshiu_00286 | 15809   | 12781   | 3029   | 1.11  | 100   |
| chr5 | 251807   | 266847   | 15041  | 0.08 | C_unshiu_00449 | 146812  | 161852  | 15041  | 7.21  | 100   |
| chr5 | 273309   | 299030   | 25722  | 0.14 | C_unshiu_00449 | 168675  | 194392  | 25718  | 12.33 | 99.54 |
| chr5 | 299970   | 303443   | 3474   | 0.02 | C_unshiu_00449 | 205193  | 201720  | 3474   | 1.67  | 100   |
| chr5 | 303464   | 305072   | 1609   | 0.01 | C_unshiu_00904 | 25407   | 27016   | 1610   | 1.38  | 99.94 |
| chr5 | 310978   | 314913   | 3936   | 0.02 | C_unshiu_00904 | 32710   | 36597   | 3888   | 3.34  | 98.12 |
| chr5 | 315395   | 336854   | 21460  | 0.12 | C_unshiu_00904 | 37042   | 58459   | 21418  | 18.38 | 99.21 |
| chr5 | 345698   | 351235   | 5538   | 0.03 | C_unshiu_00904 | 65786   | 71295   | 5510   | 4.73  | 98.88 |
| chr5 | 355954   | 363983   | 8030   | 0.05 | C_unshiu_00060 | 244141  | 252170  | 8030   | 1.39  | 99.53 |
| chr5 | 364419   | 365745   | 1327   | 0.01 | C_unshiu_02034 | 27439   | 26113   | 1327   | 3.37  | 100   |
| chr5 | 365748   | 368478   | 2731   | 0.02 | C_unshiu_02034 | 25933   | 23201   | 2733   | 6.94  | 99.85 |
| chr5 | 368480   | 372340   | 3861   | 0.02 | C_unshiu_02034 | 22872   | 19010   | 3863   | 9.81  | 99.82 |
| chr5 | 375637   | 384906   | 9270   | 0.05 | C_unshiu_01899 | 3220    | 12454   | 9235   | 20.62 | 99.23 |
| chr5 | 385376   | 390492   | 5117   | 0.03 | C_unshiu_01899 | 13452   | 18561   | 5110   | 11.41 | 99.86 |
| chr5 | 406518   | 411781   | 5264   | 0.03 | C_unshiu_01899 | 34955   | 40225   | 5271   | 11.77 | 99.2  |
| chr5 | 421204   | 422722   | 1519   | 0.01 | C_unshiu_00372 | 215285  | 213782  | 1504   | 0.65  | 98.55 |
| chr5 | 422823   | 444719   | 21897  | 0.12 | C_unshiu_00239 | 82304   | 104211  | 21908  | 7.23  | 99.35 |
| chr5 | 448920   | 464688   | 15769  | 0.09 | C_unshiu_00239 | 104214  | 119931  | 15718  | 5.19  | 98.4  |
| chr5 | 463650   | 470137   | 6488   | 0.04 | C_unshiu_00633 | 106892  | 113384  | 6493   | 4.05  | 99.71 |
| chr5 | 470166   | 475355   | 5190   | 0.03 | C_unshiu_00247 | 271129  | 265933  | 5197   | 1.75  | 98.77 |
| chr5 | 475345   | 482804   | 7460   | 0.04 | C_unshiu_00247 | 265901  | 258424  | 7478   | 2.51  | 99.02 |
| chr5 | 492803   | 495419   | 2617   | 0.01 | C_unshiu_00760 | 4091    | 6707    | 2617   | 1.94  | 100   |
| chr5 | 495425   | 497691   | 2267   | 0.01 | C_unshiu_00760 | 7064    | 9330    | 2267   | 1.68  | 99.87 |
| chr5 | 504449   | 506230   | 1782   | 0.01 | C_unshiu_00760 | 16058   | 17839   | 1782   | 1.32  | 100   |
| chr5 | 507343   | 512590   | 5248   | 0.03 | C_unshiu_00334 | 27461   | 22214   | 5248   | 2.09  | 100   |
| chr5 | 512586   | 519980   | 7395   | 0.04 | C_unshiu_00760 | 23940   | 31331   | 7392   | 5.48  | 99.49 |
| chr5 | 525468   | 537646   | 12179  | 0.07 | C_unshiu_00019 | 9936    | 22121   | 12186  | 1.44  | 99.61 |
| chr5 | 537664   | 543818   | 6155   | 0.03 | C_unshiu_00019 | 22406   | 28545   | 6140   | 0.72  | 99.16 |
| chr5 | 543985   | 547799   | 3815   | 0.02 | C_unshiu_00019 | 29208   | 33013   | 3806   | 0.45  | 99.16 |
| chr5 | 551553   | 558874   | 7322   | 0.04 | C_unshiu_00019 | 36561   | 43881   | 7321   | 0.86  | 99.81 |
| chr5 | 560143   | 561372   | 1230   | 0.01 | C_unshiu_00151 | 23587   | 24816   | 1230   | 0.32  | 99.76 |
| chr5 | 561365   | 565562   | 4198   | 0.02 | C_unshiu_00124 | 106353  | 110550  | 4198   | 1     | 100   |
| chr5 | 571747   | 572950   | 1204   | 0.01 | C_unshiu_00151 | 32159   | 33368   | 1210   | 0.31  | 99.09 |
| chr5 | 573581   | 577142   | 3562   | 0.02 | C_unshiu_00151 | 34755   | 38306   | 3552   | 0.92  | 98.29 |
| chr5 | 577162   | 600311   | 23150  | 0.13 | C_unshiu_00151 | 38670   | 61828   | 23159  | 6.01  | 99.78 |

|      |         |         |        |      |                |        |        |        |       |       |
|------|---------|---------|--------|------|----------------|--------|--------|--------|-------|-------|
| chr5 | 601885  | 685448  | 83564  | 0.47 | C_unshiu_00151 | 64230  | 147791 | 83562  | 21.67 | 99.96 |
| chr5 | 665451  | 696584  | 31134  | 0.18 | C_unshiu_00151 | 127786 | 158927 | 31142  | 8.08  | 99.97 |
| chr5 | 729044  | 741173  | 12130  | 0.07 | C_unshiu_00060 | 287640 | 299769 | 12130  | 2.09  | 99.89 |
| chr5 | 741102  | 765450  | 24349  | 0.14 | C_unshiu_00060 | 299734 | 324082 | 24349  | 4.2   | 100   |
| chr5 | 765465  | 818770  | 53306  | 0.3  | C_unshiu_00060 | 324770 | 378107 | 53338  | 9.21  | 99.87 |
| chr5 | 823137  | 825921  | 2785   | 0.02 | C_unshiu_00060 | 381901 | 384685 | 2785   | 0.48  | 99.89 |
| chr5 | 825935  | 827398  | 1464   | 0.01 | C_unshiu_00060 | 379923 | 381386 | 1464   | 0.25  | 100   |
| chr5 | 834424  | 853629  | 19206  | 0.11 | C_unshiu_00060 | 389738 | 408943 | 19206  | 3.32  | 100   |
| chr5 | 854090  | 857531  | 3442   | 0.02 | C_unshiu_00060 | 409911 | 413358 | 3448   | 0.6   | 99.54 |
| chr5 | 866259  | 873210  | 6952   | 0.04 | C_unshiu_00383 | 134092 | 141050 | 6959   | 3.06  | 99.66 |
| chr5 | 873293  | 874825  | 1533   | 0.01 | C_unshiu_02310 | 22307  | 23842  | 1536   | 5.19  | 98.96 |
| chr5 | 875247  | 930457  | 55211  | 0.31 | C_unshiu_00383 | 124477 | 69318  | 55160  | 24.24 | 99.63 |
| chr5 | 928813  | 930516  | 1704   | 0.01 | C_unshiu_00383 | 41701  | 39999  | 1703   | 0.75  | 98.77 |
| chr5 | 930618  | 959449  | 28832  | 0.16 | C_unshiu_00269 | 114217 | 143048 | 28832  | 10.23 | 99.84 |
| chr5 | 960103  | 1006230 | 46128  | 0.26 | C_unshiu_00269 | 144211 | 190371 | 46161  | 16.37 | 99.89 |
| chr5 | 986270  | 1097816 | 111547 | 0.63 | C_unshiu_00269 | 170388 | 281963 | 111576 | 39.57 | 99.96 |
| chr5 | 1093390 | 1123808 | 30419  | 0.17 | C_unshiu_00293 | 269791 | 239368 | 30424  | 11.28 | 99.98 |
| chr5 | 1123818 | 1126287 | 2470   | 0.01 | C_unshiu_00293 | 236885 | 236216 | 2470   | 0.92  | 100   |
| chr5 | 1127499 | 1137476 | 9978   | 0.06 | C_unshiu_00293 | 236157 | 226202 | 9956   | 3.69  | 99.48 |
| chr5 | 1137470 | 1139121 | 1652   | 0.01 | C_unshiu_00204 | 45854  | 44203  | 1652   | 0.5   | 100   |
| chr5 | 1140392 | 1218208 | 77817  | 0.44 | C_unshiu_00324 | 253514 | 175978 | 77537  | 30.42 | 99.42 |
| chr5 | 1218812 | 1285467 | 66656  | 0.38 | C_unshiu_00324 | 176077 | 109416 | 66662  | 26.15 | 99.86 |
| chr5 | 1285482 | 1297094 | 11613  | 0.07 | C_unshiu_00324 | 109099 | 97498  | 11602  | 4.55  | 99.81 |
| chr5 | 1301621 | 1323687 | 22067  | 0.12 | C_unshiu_00486 | 3      | 22133  | 22131  | 11.24 | 98.76 |
| chr5 | 1339566 | 1345420 | 5855   | 0.03 | C_unshiu_00684 | 78884  | 73022  | 5863   | 3.97  | 98.4  |
| chr5 | 1352618 | 1355382 | 2765   | 0.02 | C_unshiu_00684 | 72161  | 69381  | 2781   | 1.88  | 98.96 |
| chr5 | 1360904 | 1366648 | 5745   | 0.03 | C_unshiu_01590 | 1275   | 7017   | 5743   | 9.86  | 99.72 |
| chr5 | 1368359 | 1386417 | 18059  | 0.1  | C_unshiu_01590 | 9230   | 27249  | 18020  | 30.95 | 99.64 |
| chr5 | 1398767 | 1399914 | 1148   | 0.01 | C_unshiu_00583 | 80038  | 81184  | 1147   | 0.67  | 98.43 |
| chr5 | 1404200 | 1405212 | 1013   | 0.01 | C_unshiu_01690 | 45922  | 44910  | 1013   | 1.91  | 100   |
| chr5 | 1405205 | 1416208 | 11004  | 0.06 | C_unshiu_00684 | 30089  | 19047  | 11043  | 7.47  | 98.65 |
| chr5 | 1427701 | 1434987 | 7287   | 0.04 | C_unshiu_00382 | 1506   | 8801   | 7296   | 3.19  | 99.07 |
| chr5 | 1436663 | 1438717 | 2055   | 0.01 | C_unshiu_00382 | 10886  | 12940  | 2055   | 0.9   | 100   |
| chr5 | 1440626 | 1443722 | 3097   | 0.02 | C_unshiu_00382 | 13975  | 17070  | 3096   | 1.35  | 98.94 |
| chr5 | 1443754 | 1481294 | 37541  | 0.21 | C_unshiu_00382 | 17442  | 54904  | 37463  | 16.38 | 99.36 |
| chr5 | 1499425 | 1509226 | 9802   | 0.06 | C_unshiu_01193 | 74918  | 84748  | 9831   | 11.39 | 98.87 |
| chr5 | 1511393 | 1525331 | 13939  | 0.08 | C_unshiu_01234 | 48392  | 34500  | 13893  | 16.93 | 99.03 |
| chr5 | 1525596 | 1536741 | 11146  | 0.06 | C_unshiu_01234 | 34170  | 23027  | 11144  | 13.58 | 99.35 |
| chr5 | 1537762 | 1561710 | 23949  | 0.13 | C_unshiu_01833 | 35768  | 11814  | 23955  | 50.68 | 99.9  |
| chr5 | 1563026 | 1573015 | 9990   | 0.06 | C_unshiu_01833 | 10024  | 14     | 10011  | 21.18 | 98.12 |
| chr5 | 1569879 | 1593828 | 23950  | 0.13 | C_unshiu_00149 | 126197 | 150236 | 24040  | 6.21  | 98.05 |
| chr5 | 1598440 | 1609489 | 11050  | 0.06 | C_unshiu_02458 | 8159   | 19209  | 11051  | 42.67 | 99.35 |
| chr5 | 1610178 | 1613076 | 2899   | 0.02 | C_unshiu_02458 | 19892  | 22794  | 2903   | 11.21 | 99.86 |
| chr5 | 1613717 | 1615937 | 2221   | 0.01 | C_unshiu_02458 | 23678  | 25898  | 2221   | 8.58  | 99.51 |
| chr5 | 1629510 | 1632462 | 2953   | 0.02 | C_unshiu_00149 | 168191 | 171147 | 2957   | 0.76  | 99.05 |
| chr5 | 1632483 | 1638860 | 6378   | 0.04 | C_unshiu_00149 | 171904 | 178291 | 6388   | 1.65  | 98.47 |
| chr5 | 1638885 | 1645887 | 7003   | 0.04 | C_unshiu_00149 | 178504 | 185480 | 6977   | 1.8   | 98.21 |
| chr5 | 1646999 | 1657409 | 10411  | 0.06 | C_unshiu_00149 | 187598 | 198008 | 10411  | 2.69  | 99.93 |
| chr5 | 1663023 | 1670973 | 7951   | 0.04 | C_unshiu_02041 | 8248   | 16198  | 7951   | 20.34 | 98.5  |
| chr5 | 1696021 | 1764424 | 68404  | 0.39 | C_unshiu_00062 | 406799 | 338455 | 68345  | 12.17 | 99.79 |
| chr5 | 1764415 | 1797187 | 32773  | 0.18 | C_unshiu_00062 | 335601 | 302829 | 32773  | 5.84  | 100   |
| chr5 | 1798055 | 1800431 | 2377   | 0.01 | C_unshiu_00062 | 301735 | 299359 | 2377   | 0.42  | 99.83 |
| chr5 | 1802147 | 1845070 | 42924  | 0.24 | C_unshiu_00062 | 298878 | 255957 | 42922  | 7.64  | 99.93 |
| chr5 | 1849886 | 1882347 | 32462  | 0.18 | C_unshiu_00062 | 251925 | 219473 | 32453  | 5.78  | 99.95 |
| chr5 | 1886157 | 1916932 | 30776  | 0.17 | C_unshiu_00062 | 217674 | 186887 | 30788  | 5.48  | 99.69 |
| chr5 | 1921849 | 1942234 | 20386  | 0.11 | C_unshiu_00062 | 182745 | 162343 | 20403  | 3.63  | 99.73 |
| chr5 | 1948336 | 1958545 | 10210  | 0.06 | C_unshiu_00062 | 142839 | 153048 | 10210  | 1.82  | 99.99 |
| chr5 | 1965247 | 1966699 | 1453   | 0.01 | C_unshiu_00063 | 38635  | 40082  | 1448   | 0.26  | 99.52 |
| chr5 | 1974920 | 1991584 | 16665  | 0.09 | C_unshiu_00063 | 26195  | 9545   | 16651  | 2.97  | 99.65 |
| chr5 | 1989192 | 2004986 | 15795  | 0.09 | C_unshiu_02524 | 23947  | 8152   | 15796  | 65.96 | 99.99 |
| chr5 | 2049814 | 2073087 | 23274  | 0.13 | C_unshiu_02070 | 26501  | 3234   | 23268  | 61.45 | 99.94 |
| chr5 | 2076699 | 2078796 | 2098   | 0.01 | C_unshiu_02231 | 30140  | 32237  | 2098   | 6.51  | 100   |
| chr5 | 2078724 | 2082338 | 3615   | 0.02 | C_unshiu_02231 | 30136  | 26522  | 3615   | 11.21 | 100   |
| chr5 | 2085883 | 2086936 | 1054   | 0.01 | C_unshiu_02231 | 21710  | 20657  | 1054   | 3.27  | 99.53 |
| chr5 | 2092298 | 2101552 | 9255   | 0.05 | C_unshiu_02231 | 16049  | 6793   | 9257   | 28.71 | 99.98 |
| chr5 | 2101870 | 2104628 | 2759   | 0.02 | C_unshiu_02231 | 6377   | 3624   | 2754   | 8.54  | 98.16 |
| chr5 | 2107080 | 2111019 | 3940   | 0.02 | C_unshiu_02231 | 3942   | 1      | 3942   | 12.23 | 99.47 |
| chr5 | 2112647 | 2135344 | 22698  | 0.13 | C_unshiu_02119 | 28420  | 5722   | 22699  | 63.31 | 99.98 |
| chr5 | 2135750 | 2138783 | 3034   | 0.02 | C_unshiu_02119 | 4929   | 1897   | 3033   | 8.46  | 99.9  |
| chr5 | 2138874 | 2140873 | 2000   | 0.01 | C_unshiu_00266 | 253456 | 251457 | 2000   | 0.7   | 98.1  |
| chr5 | 2140308 | 2144250 | 3943   | 0.02 | C_unshiu_00266 | 284481 | 280539 | 3943   | 1.39  | 99.85 |
| chr5 | 2145378 | 2146722 | 1345   | 0.01 | C_unshiu_00266 | 263385 | 262041 | 1345   | 0.47  | 99.48 |
| chr5 | 2153616 | 2157870 | 4255   | 0.02 | C_unshiu_00266 | 270453 | 266202 | 4252   | 1.49  | 99.69 |
| chr5 | 2158683 | 2159856 | 1174   | 0.01 | C_unshiu_00266 | 264550 | 263376 | 1175   | 0.41  | 99.74 |
| chr5 | 2159855 | 2164114 | 4260   | 0.02 | C_unshiu_00266 | 248574 | 244348 | 4227   | 1.49  | 98.9  |
| chr5 | 2167146 | 2184314 | 17169  | 0.1  | C_unshiu_00266 | 241842 | 224617 | 17226  | 6.06  | 98.44 |
| chr5 | 2192928 | 2203186 | 10259  | 0.06 | C_unshiu_00266 | 216859 | 206565 | 10295  | 3.62  | 98.59 |
| chr5 | 2203371 | 2219430 | 16060  | 0.09 | C_unshiu_00266 | 205966 | 189979 | 15988  | 5.62  | 98.72 |
| chr5 | 2221852 | 2226860 | 5009   | 0.03 | C_unshiu_00151 | 360831 | 365839 | 5009   | 1.3   | 100   |

|      |         |         |       |      |                |        |        |       |       |       |
|------|---------|---------|-------|------|----------------|--------|--------|-------|-------|-------|
| chr5 | 2227050 | 2231618 | 4569  | 0.03 | C_unshiu_00151 | 366095 | 370669 | 4575  | 1.19  | 99.69 |
| chr5 | 2231619 | 2238479 | 6861  | 0.04 | C_unshiu_00029 | 630397 | 637257 | 6861  | 0.96  | 100   |
| chr5 | 2238477 | 2239756 | 1280  | 0.01 | C_unshiu_00707 | 13096  | 14375  | 1280  | 0.9   | 98.52 |
| chr5 | 2243833 | 2247427 | 3595  | 0.02 | C_unshiu_00151 | 385616 | 382039 | 3578  | 0.93  | 98.75 |
| chr5 | 2245751 | 2249833 | 4083  | 0.02 | C_unshiu_00151 | 380335 | 376251 | 4085  | 1.06  | 99.9  |
| chr5 | 2253332 | 2253399 | 2068  | 0.01 | C_unshiu_00707 | 9227   | 11298  | 2072  | 1.45  | 99.61 |
| chr5 | 2258059 | 2272961 | 14903 | 0.08 | C_unshiu_00464 | 1      | 14902  | 14902 | 7.32  | 99.99 |
| chr5 | 2273529 | 2282153 | 8625  | 0.05 | C_unshiu_00668 | 134153 | 125524 | 8630  | 5.65  | 99.71 |
| chr5 | 2279289 | 2307686 | 28398 | 0.16 | C_unshiu_00292 | 269919 | 241510 | 28410 | 10.53 | 99.66 |
| chr5 | 2309250 | 2343995 | 34746 | 0.2  | C_unshiu_00292 | 239402 | 204660 | 34743 | 12.87 | 99.95 |
| chr5 | 2344659 | 2350163 | 5505  | 0.03 | C_unshiu_00292 | 204194 | 198685 | 5510  | 2.04  | 99.73 |
| chr5 | 2350164 | 2351965 | 1802  | 0.01 | C_unshiu_00775 | 118175 | 119976 | 1802  | 1.36  | 100   |
| chr5 | 2351959 | 2388509 | 36551 | 0.21 | C_unshiu_00292 | 196404 | 159838 | 36567 | 13.55 | 99.94 |
| chr5 | 2390132 | 2395987 | 5856  | 0.03 | C_unshiu_00292 | 157880 | 152025 | 5856  | 2.17  | 99.98 |
| chr5 | 2398633 | 2401973 | 3341  | 0.02 | C_unshiu_01078 | 39721  | 43064  | 3344  | 3.41  | 99.17 |
| chr5 | 2402170 | 2414534 | 12365 | 0.07 | C_unshiu_01078 | 43667  | 56040  | 12374 | 12.62 | 99.27 |
| chr5 | 2415358 | 2423627 | 8270  | 0.05 | C_unshiu_01078 | 1068   | 9337   | 8270  | 8.43  | 99.87 |
| chr5 | 2432084 | 2448377 | 16294 | 0.09 | C_unshiu_01692 | 25269  | 41578  | 16310 | 30.88 | 99.09 |
| chr5 | 2448478 | 2451856 | 3379  | 0.02 | C_unshiu_00319 | 252217 | 248839 | 3379  | 1.32  | 99.82 |
| chr5 | 2465514 | 2468112 | 2599  | 0.01 | C_unshiu_00319 | 237043 | 234444 | 2600  | 1.01  | 98.81 |
| chr5 | 2479498 | 2483009 | 3512  | 0.02 | C_unshiu_00319 | 224639 | 221099 | 3541  | 1.38  | 98.08 |
| chr5 | 2534043 | 2553055 | 19013 | 0.11 | C_unshiu_00319 | 171682 | 152611 | 19072 | 7.43  | 98.65 |
| chr5 | 2554856 | 2562679 | 7824  | 0.04 | C_unshiu_00319 | 147733 | 139884 | 7850  | 3.06  | 98.82 |
| chr5 | 2567086 | 2572611 | 5526  | 0.03 | C_unshiu_00319 | 135162 | 129636 | 5527  | 2.15  | 99.89 |
| chr5 | 2574237 | 2587128 | 12892 | 0.07 | C_unshiu_00319 | 127447 | 114492 | 12956 | 5.05  | 98.07 |
| chr5 | 2592496 | 2601404 | 8909  | 0.05 | C_unshiu_02969 | 901    | 9790   | 8890  | 64.33 | 99.05 |
| chr5 | 2629688 | 2632984 | 3297  | 0.02 | C_unshiu_00319 | 73723  | 70419  | 3305  | 1.29  | 98.97 |
| chr5 | 2632976 | 2637649 | 4674  | 0.03 | C_unshiu_00319 | 70300  | 65651  | 4650  | 1.81  | 98.34 |
| chr5 | 2641833 | 2647068 | 5236  | 0.03 | C_unshiu_00319 | 61712  | 56467  | 5246  | 2.04  | 99.05 |
| chr5 | 2654028 | 2656205 | 2178  | 0.01 | C_unshiu_00319 | 51089  | 48912  | 2178  | 0.85  | 99.59 |
| chr5 | 2657508 | 2659852 | 2345  | 0.01 | C_unshiu_02773 | 16182  | 18526  | 2345  | 12.66 | 99.1  |
| chr5 | 2740335 | 2746666 | 6332  | 0.04 | C_unshiu_00238 | 260868 | 254542 | 6327  | 2.09  | 98.13 |
| chr5 | 2771691 | 2772777 | 1087  | 0.01 | C_unshiu_01104 | 66303  | 67389  | 1087  | 1.13  | 100   |
| chr5 | 2776782 | 2779706 | 2925  | 0.02 | C_unshiu_00238 | 231572 | 228648 | 2925  | 0.97  | 100   |
| chr5 | 2784761 | 2801275 | 16515 | 0.09 | C_unshiu_00238 | 222853 | 206290 | 16564 | 5.47  | 98.2  |
| chr5 | 2802135 | 2806441 | 4307  | 0.02 | C_unshiu_00238 | 205216 | 200904 | 4313  | 1.42  | 98.36 |
| chr5 | 2808328 | 2819696 | 11369 | 0.06 | C_unshiu_00238 | 197888 | 186471 | 11418 | 3.77  | 98.64 |
| chr5 | 2819702 | 2843698 | 23997 | 0.14 | C_unshiu_00238 | 185461 | 161445 | 24017 | 7.93  | 98.91 |
| chr5 | 2886718 | 2908597 | 21880 | 0.12 | C_unshiu_00238 | 119513 | 97501  | 22013 | 7.27  | 98.44 |
| chr5 | 2911109 | 2961277 | 50169 | 0.28 | C_unshiu_00238 | 99138  | 48753  | 50386 | 16.63 | 98.18 |
| chr5 | 2961775 | 2967324 | 5550  | 0.03 | C_unshiu_00238 | 47285  | 41713  | 5573  | 1.84  | 99    |
| chr5 | 2968377 | 2972721 | 4345  | 0.02 | C_unshiu_00238 | 39860  | 35508  | 4353  | 1.44  | 99.22 |
| chr5 | 2974215 | 2979041 | 4827  | 0.03 | C_unshiu_00238 | 34793  | 29951  | 4843  | 1.6   | 98.97 |
| chr5 | 2996239 | 3012172 | 15934 | 0.09 | C_unshiu_00238 | 19794  | 3853   | 15942 | 5.26  | 98.59 |
| chr5 | 3016405 | 3018071 | 1667  | 0.01 | C_unshiu_00238 | 1649   | 1      | 1649  | 0.54  | 98.14 |
| chr5 | 3024750 | 3058335 | 33586 | 0.19 | C_unshiu_00985 | 11632  | 45294  | 33663 | 31.14 | 98.42 |
| chr5 | 3085249 | 3090752 | 5504  | 0.03 | C_unshiu_00985 | 71930  | 77446  | 5517  | 5.1   | 98.3  |
| chr5 | 3105187 | 3106342 | 1156  | 0.01 | C_unshiu_00985 | 97054  | 98210  | 1157  | 1.07  | 99.14 |
| chr5 | 3111646 | 3114710 | 3065  | 0.02 | C_unshiu_00477 | 10104  | 13188  | 3085  | 1.55  | 98.32 |
| chr5 | 3116727 | 3135563 | 18837 | 0.11 | C_unshiu_00477 | 15742  | 34605  | 18864 | 9.46  | 98.92 |
| chr5 | 3138575 | 3150956 | 12382 | 0.07 | C_unshiu_00477 | 36104  | 48461  | 12358 | 6.2   | 99.01 |
| chr5 | 3150950 | 3155596 | 4647  | 0.03 | C_unshiu_00477 | 48403  | 53047  | 4645  | 2.33  | 99.31 |
| chr5 | 3156057 | 3171961 | 15905 | 0.09 | C_unshiu_00477 | 53523  | 69440  | 15918 | 7.99  | 98.14 |
| chr5 | 3199036 | 3249806 | 50771 | 0.29 | C_unshiu_00825 | 3597   | 54333  | 50737 | 40.38 | 99.7  |
| chr5 | 3256274 | 3306463 | 50190 | 0.28 | C_unshiu_00825 | 61729  | 111977 | 50249 | 39.99 | 99.65 |
| chr5 | 3307084 | 3315595 | 8512  | 0.05 | C_unshiu_00825 | 113043 | 121590 | 8548  | 6.8   | 99.38 |
| chr5 | 3318792 | 3332007 | 13216 | 0.07 | C_unshiu_00929 | 47916  | 61187  | 13272 | 11.67 | 98.96 |
| chr5 | 3338960 | 3372652 | 33693 | 0.19 | C_unshiu_00929 | 68517  | 102304 | 33788 | 29.7  | 99.28 |
| chr5 | 3378625 | 3384788 | 6164  | 0.03 | C_unshiu_00929 | 107564 | 113754 | 6191  | 5.44  | 99.24 |
| chr5 | 3379503 | 3388162 | 8660  | 0.05 | C_unshiu_01426 | 4420   | 13110  | 8691  | 12.67 | 99.29 |
| chr5 | 3388340 | 3400656 | 12317 | 0.07 | C_unshiu_01426 | 13540  | 25856  | 12317 | 17.96 | 100   |
| chr5 | 3402048 | 3403672 | 1625  | 0.01 | C_unshiu_01039 | 99204  | 100798 | 1595  | 1.56  | 98.03 |
| chr5 | 3404910 | 3407463 | 2554  | 0.01 | C_unshiu_01426 | 29335  | 31881  | 2547  | 3.71  | 99.57 |
| chr5 | 3408335 | 3409437 | 1103  | 0.01 | C_unshiu_01001 | 80996  | 82098  | 1103  | 1.04  | 100   |
| chr5 | 3410516 | 3412250 | 1735  | 0.01 | C_unshiu_01250 | 30049  | 28315  | 1735  | 2.14  | 99.94 |
| chr5 | 3419320 | 3420699 | 1380  | 0.01 | C_unshiu_01250 | 21248  | 19870  | 1379  | 1.7   | 99.71 |
| chr5 | 3430956 | 3509482 | 78527 | 0.44 | C_unshiu_00946 | 105552 | 27008  | 78545 | 70.19 | 99.95 |
| chr5 | 3521135 | 3524774 | 3640  | 0.02 | C_unshiu_02307 | 24989  | 21346  | 3644  | 12.29 | 99.62 |
| chr5 | 3525738 | 3532649 | 6912  | 0.04 | C_unshiu_02307 | 20018  | 13107  | 6912  | 23.32 | 99.88 |
| chr5 | 3534370 | 3545828 | 11459 | 0.06 | C_unshiu_02307 | 12612  | 1153   | 11460 | 38.67 | 99.82 |
| chr5 | 3553499 | 3563204 | 9706  | 0.05 | C_unshiu_00377 | 866    | 10584  | 9719  | 4.21  | 99.11 |
| chr5 | 3571932 | 3575997 | 4066  | 0.02 | C_unshiu_00377 | 20070  | 24140  | 4071  | 1.76  | 99.14 |
| chr5 | 3576003 | 3593936 | 17934 | 0.1  | C_unshiu_00377 | 23889  | 41905  | 18017 | 7.8   | 99.1  |
| chr5 | 3650458 | 3674468 | 24011 | 0.14 | C_unshiu_00377 | 90506  | 114483 | 23978 | 10.38 | 99.58 |
| chr5 | 3674480 | 3676702 | 2223  | 0.01 | C_unshiu_00377 | 115341 | 117563 | 2223  | 0.96  | 99.82 |
| chr5 | 3678139 | 3698464 | 20326 | 0.11 | C_unshiu_00377 | 119328 | 139709 | 20382 | 8.82  | 99.59 |
| chr5 | 3698730 | 3725003 | 26274 | 0.15 | C_unshiu_00377 | 141215 | 167436 | 26222 | 11.35 | 99.35 |
| chr5 | 3725024 | 3729469 | 4446  | 0.03 | C_unshiu_00377 | 168554 | 172995 | 4442  | 1.92  | 98.92 |
| chr5 | 3730998 | 3758021 | 27024 | 0.15 | C_unshiu_00377 | 174144 | 201089 | 26946 | 11.66 | 98.65 |

|      |         |         |        |      |                |        |        |        |       |       |
|------|---------|---------|--------|------|----------------|--------|--------|--------|-------|-------|
| chr5 | 3758062 | 3772475 | 14414  | 0.08 | C_unshiu_00377 | 200989 | 215375 | 14387  | 6.23  | 99.63 |
| chr5 | 3769454 | 3789128 | 19675  | 0.11 | C_unshiu_01695 | 1      | 19705  | 19705  | 37.4  | 99.63 |
| chr5 | 3789041 | 3794836 | 5796   | 0.03 | C_unshiu_01695 | 19679  | 25475  | 5797   | 11    | 99.78 |
| chr5 | 3795143 | 3801050 | 5908   | 0.03 | C_unshiu_01695 | 25971  | 31860  | 5890   | 11.18 | 98.83 |
| chr5 | 3801425 | 3803048 | 1624   | 0.01 | C_unshiu_00226 | 194961 | 196587 | 1627   | 0.52  | 99.57 |
| chr5 | 3810438 | 3837298 | 26861  | 0.15 | C_unshiu_00374 | 219898 | 193038 | 26861  | 11.6  | 99.22 |
| chr5 | 3838038 | 3839445 | 1408   | 0.01 | C_unshiu_00374 | 192478 | 191070 | 1409   | 0.61  | 99.72 |
| chr5 | 3844417 | 3868612 | 24196  | 0.14 | C_unshiu_00374 | 186003 | 161728 | 24276  | 10.48 | 99.47 |
| chr5 | 3868707 | 3871174 | 2468   | 0.01 | C_unshiu_00374 | 161605 | 159138 | 2468   | 1.07  | 99.92 |
| chr5 | 3871195 | 3896036 | 24842  | 0.14 | C_unshiu_00374 | 158978 | 134137 | 24842  | 10.72 | 99.78 |
| chr5 | 3895701 | 3912573 | 16873  | 0.1  | C_unshiu_00374 | 134136 | 117263 | 16874  | 7.28  | 99.82 |
| chr5 | 3912882 | 3914154 | 1273   | 0.01 | C_unshiu_00374 | 116835 | 115562 | 1274   | 0.55  | 99.69 |
| chr5 | 3915256 | 3917382 | 2127   | 0.01 | C_unshiu_00374 | 113952 | 111826 | 2127   | 0.92  | 99.81 |
| chr5 | 3917523 | 3925860 | 8338   | 0.05 | C_unshiu_00374 | 111824 | 103551 | 8274   | 3.57  | 98.22 |
| chr5 | 3937442 | 3938581 | 1140   | 0.01 | C_unshiu_00374 | 91566  | 90427  | 1140   | 0.49  | 99.91 |
| chr5 | 3942877 | 3944322 | 1446   | 0.01 | C_unshiu_00374 | 85291  | 83849  | 1443   | 0.62  | 99.65 |
| chr5 | 3944344 | 3945837 | 1494   | 0.01 | C_unshiu_00374 | 83597  | 82105  | 1493   | 0.64  | 99.93 |
| chr5 | 3951684 | 3957387 | 5704   | 0.03 | C_unshiu_00374 | 76735  | 71030  | 5706   | 2.46  | 99.72 |
| chr5 | 3964536 | 3968360 | 3825   | 0.02 | C_unshiu_00374 | 64245  | 60363  | 3883   | 1.68  | 98.35 |
| chr5 | 3971356 | 3973232 | 1877   | 0.01 | C_unshiu_00374 | 58810  | 56932  | 1879   | 0.81  | 99.73 |
| chr5 | 3976209 | 3980824 | 4616   | 0.03 | C_unshiu_00374 | 53812  | 49141  | 4672   | 2.02  | 98.57 |
| chr5 | 3981045 | 3987834 | 16790  | 0.09 | C_unshiu_00374 | 48669  | 31902  | 16768  | 7.24  | 98.59 |
| chr5 | 4001330 | 4002692 | 1363   | 0.01 | C_unshiu_00374 | 27094  | 25731  | 1364   | 0.59  | 99.78 |
| chr5 | 4003040 | 4005610 | 2571   | 0.01 | C_unshiu_00374 | 25234  | 22633  | 2602   | 1.12  | 98.73 |
| chr5 | 4008989 | 4010479 | 1491   | 0.01 | C_unshiu_00374 | 18958  | 17470  | 1489   | 0.64  | 99.8  |
| chr5 | 4010098 | 4018463 | 8366   | 0.05 | C_unshiu_00374 | 17714  | 9364   | 8351   | 3.61  | 99.4  |
| chr5 | 4032869 | 4050046 | 17178  | 0.1  | C_unshiu_00531 | 55113  | 38010  | 17104  | 9.31  | 99.27 |
| chr5 | 4049909 | 4079904 | 29996  | 0.17 | C_unshiu_00531 | 38084  | 8079   | 30006  | 16.33 | 99.64 |
| chr5 | 4075652 | 4081928 | 6277   | 0.04 | C_unshiu_01903 | 1      | 6271   | 6271   | 14.06 | 99.49 |
| chr5 | 4082164 | 4117386 | 35223  | 0.2  | C_unshiu_01903 | 6920   | 42124  | 35205  | 78.95 | 99.37 |
| chr5 | 4118339 | 4122542 | 4204   | 0.02 | C_unshiu_00226 | 284199 | 280017 | 4183   | 1.34  | 99.07 |
| chr5 | 4124728 | 4130155 | 5428   | 0.03 | C_unshiu_00226 | 277245 | 271818 | 5428   | 1.74  | 99.83 |
| chr5 | 4131247 | 4142652 | 11406  | 0.06 | C_unshiu_00226 | 270381 | 258975 | 11407  | 3.67  | 99.89 |
| chr5 | 4143326 | 4147951 | 4626   | 0.03 | C_unshiu_00226 | 257956 | 253330 | 4627   | 1.49  | 99.55 |
| chr5 | 4148497 | 4151701 | 3205   | 0.02 | C_unshiu_00226 | 252897 | 249720 | 3178   | 1.02  | 98.29 |
| chr5 | 4158636 | 4167040 | 8405   | 0.05 | C_unshiu_00226 | 243812 | 235402 | 8411   | 2.7   | 99.45 |
| chr5 | 4183338 | 4187597 | 4260   | 0.02 | C_unshiu_00226 | 232026 | 227760 | 4267   | 1.37  | 99.11 |
| chr5 | 4188146 | 4190249 | 2104   | 0.01 | C_unshiu_00226 | 225929 | 223826 | 2104   | 0.68  | 99.9  |
| chr5 | 4190365 | 4200317 | 9953   | 0.06 | C_unshiu_00226 | 223504 | 213532 | 9973   | 3.2   | 98.97 |
| chr5 | 4200532 | 4212602 | 12071  | 0.07 | C_unshiu_00226 | 213361 | 201292 | 12070  | 3.88  | 99.67 |
| chr5 | 4213089 | 4217081 | 3993   | 0.02 | C_unshiu_00226 | 200465 | 196473 | 3993   | 1.28  | 100   |
| chr5 | 4219638 | 4227456 | 7819   | 0.04 | C_unshiu_00226 | 194726 | 186908 | 7819   | 2.51  | 99.8  |
| chr5 | 4229835 | 4245265 | 15431  | 0.09 | C_unshiu_00226 | 185011 | 169585 | 15427  | 4.96  | 99.73 |
| chr5 | 4260063 | 4265714 | 5652   | 0.03 | C_unshiu_00226 | 168630 | 162981 | 5650   | 1.82  | 99.86 |
| chr5 | 4266809 | 4276034 | 9226   | 0.05 | C_unshiu_00226 | 160809 | 151579 | 9231   | 2.97  | 99.89 |
| chr5 | 4288839 | 4289975 | 1137   | 0.01 | C_unshiu_00226 | 146658 | 145521 | 1138   | 0.37  | 99.65 |
| chr5 | 4294523 | 4305560 | 11038  | 0.06 | C_unshiu_00145 | 237391 | 226354 | 11038  | 2.79  | 100   |
| chr5 | 4306896 | 4310324 | 3429   | 0.02 | C_unshiu_00145 | 224534 | 221119 | 3416   | 0.86  | 99.1  |
| chr5 | 4311429 | 4428372 | 116944 | 0.66 | C_unshiu_00145 | 218151 | 101130 | 117022 | 29.57 | 99.78 |
| chr5 | 4431463 | 4438351 | 6889   | 0.04 | C_unshiu_00145 | 96870  | 89975  | 6896   | 1.74  | 99.81 |
| chr5 | 4444731 | 4462152 | 17422  | 0.1  | C_unshiu_01893 | 43639  | 26204  | 17436  | 38.78 | 99.75 |
| chr5 | 4463046 | 4485746 | 22701  | 0.13 | C_unshiu_01893 | 24143  | 1448   | 22696  | 50.48 | 99.97 |
| chr5 | 4488010 | 4502796 | 14787  | 0.08 | C_unshiu_01305 | 586    | 15247  | 14662  | 19.07 | 99.11 |
| chr5 | 4510739 | 4542319 | 31581  | 0.18 | C_unshiu_00565 | 127204 | 95632  | 31573  | 18.06 | 99.89 |
| chr5 | 4558888 | 4581031 | 22144  | 0.12 | C_unshiu_00201 | 7306   | 29468  | 22163  | 6.61  | 99.72 |
| chr5 | 4581512 | 4587398 | 5887   | 0.03 | C_unshiu_00558 | 147453 | 141567 | 5887   | 3.34  | 100   |
| chr5 | 4587638 | 4612606 | 24969  | 0.14 | C_unshiu_00201 | 36144  | 61082  | 24939  | 7.43  | 99.78 |
| chr5 | 4613322 | 4615667 | 2346   | 0.01 | C_unshiu_00201 | 62325  | 64671  | 2347   | 0.7   | 99.79 |
| chr5 | 4615664 | 4618716 | 3053   | 0.02 | C_unshiu_00201 | 64917  | 67969  | 3053   | 0.91  | 99.97 |
| chr5 | 4618851 | 4623202 | 4352   | 0.02 | C_unshiu_00201 | 68154  | 72505  | 4352   | 1.3   | 99.93 |
| chr5 | 4622779 | 4677957 | 55179  | 0.31 | C_unshiu_00201 | 72928  | 128012 | 55085  | 16.42 | 99.63 |
| chr5 | 4677948 | 4679413 | 1466   | 0.01 | C_unshiu_00201 | 128686 | 130160 | 1475   | 0.44  | 99.32 |
| chr5 | 4679332 | 4692315 | 12984  | 0.07 | C_unshiu_00201 | 130229 | 143226 | 12998  | 3.87  | 99.82 |
| chr5 | 4692518 | 4719175 | 26658  | 0.15 | C_unshiu_00201 | 143218 | 169891 | 26674  | 7.95  | 99.78 |
| chr5 | 4721156 | 4723162 | 2007   | 0.01 | C_unshiu_00246 | 240949 | 242955 | 2007   | 0.67  | 99.9  |
| chr5 | 4724947 | 4734233 | 9287   | 0.05 | C_unshiu_00246 | 245208 | 254494 | 9287   | 3.11  | 100   |
| chr5 | 4735322 | 4749818 | 14497  | 0.08 | C_unshiu_00246 | 255924 | 270412 | 14489  | 4.85  | 99.77 |
| chr5 | 4752341 | 4771591 | 19251  | 0.11 | C_unshiu_00246 | 273204 | 292454 | 19251  | 6.44  | 99.99 |
| chr5 | 4780083 | 4781800 | 1718   | 0.01 | C_unshiu_00056 | 577208 | 578925 | 1718   | 0.29  | 99.36 |
| chr5 | 4782958 | 4791841 | 8884   | 0.05 | C_unshiu_00056 | 580452 | 589311 | 8860   | 1.49  | 98.4  |
| chr5 | 4792767 | 4793898 | 1132   | 0.01 | C_unshiu_00056 | 590389 | 591521 | 1133   | 0.19  | 99.56 |
| chr5 | 4793999 | 4805114 | 11116  | 0.06 | C_unshiu_00243 | 287075 | 298142 | 11068  | 3.69  | 99.29 |
| chr5 | 4805251 | 4807287 | 2037   | 0.01 | C_unshiu_00243 | 298229 | 300264 | 2036   | 0.68  | 99.26 |
| chr5 | 4814268 | 4829210 | 14943  | 0.08 | C_unshiu_00031 | 67085  | 82021  | 14937  | 2.11  | 99.46 |
| chr5 | 4829215 | 4840906 | 11692  | 0.07 | C_unshiu_00031 | 82921  | 94615  | 11695  | 1.65  | 99.29 |
| chr5 | 4840887 | 4864847 | 23961  | 0.14 | C_unshiu_00031 | 94926  | 118892 | 23967  | 3.38  | 99.84 |
| chr5 | 4866457 | 4868420 | 1964   | 0.01 | C_unshiu_00031 | 120975 | 122938 | 1964   | 0.28  | 99.24 |
| chr5 | 4870894 | 4896504 | 25611  | 0.14 | C_unshiu_00031 | 126262 | 151837 | 25576  | 3.61  | 99.44 |
| chr5 | 4896584 | 4922223 | 25640  | 0.14 | C_unshiu_00031 | 151928 | 177574 | 25647  | 3.62  | 99.3  |

|      |         |         |        |      |                |        |        |        |       |       |
|------|---------|---------|--------|------|----------------|--------|--------|--------|-------|-------|
| chr5 | 4922215 | 5052845 | 130631 | 0.74 | C_unshiu_00031 | 178562 | 309109 | 130548 | 18.41 | 99.73 |
| chr5 | 5052844 | 5063475 | 10632  | 0.06 | C_unshiu_00031 | 309235 | 319890 | 10656  | 1.5   | 99.27 |
| chr5 | 5063473 | 5070531 | 7059   | 0.04 | C_unshiu_00031 | 319923 | 326971 | 7049   | 0.99  | 99.22 |
| chr5 | 5070546 | 5073161 | 2616   | 0.01 | C_unshiu_00031 | 327275 | 329904 | 2630   | 0.37  | 98.75 |
| chr5 | 5080774 | 5082017 | 1244   | 0.01 | C_unshiu_00031 | 330216 | 331460 | 1245   | 0.18  | 99.6  |
| chr5 | 5083194 | 5085770 | 2577   | 0.01 | C_unshiu_00031 | 333614 | 336196 | 2583   | 0.36  | 98.72 |
| chr5 | 5085767 | 5087139 | 1373   | 0.01 | C_unshiu_00414 | 22734  | 24105  | 1372   | 0.62  | 99.71 |
| chr5 | 5087140 | 5088462 | 1323   | 0.01 | C_unshiu_00031 | 338045 | 339376 | 1332   | 0.19  | 98.65 |
| chr5 | 5089348 | 5092896 | 3549   | 0.02 | C_unshiu_00031 | 341067 | 344614 | 3548   | 0.5   | 99.1  |
| chr5 | 5093416 | 5109807 | 16392  | 0.09 | C_unshiu_00031 | 344613 | 361019 | 16407  | 2.31  | 99.54 |
| chr5 | 5114133 | 5136052 | 21920  | 0.12 | C_unshiu_00031 | 364129 | 386049 | 21921  | 3.09  | 98.23 |
| chr5 | 5137780 | 5142172 | 4393   | 0.02 | C_unshiu_00031 | 386397 | 390779 | 4383   | 0.62  | 99.25 |
| chr5 | 5142168 | 5144375 | 2208   | 0.01 | C_unshiu_00031 | 390740 | 392947 | 2208   | 0.31  | 99.37 |
| chr5 | 5144652 | 5154856 | 10205  | 0.06 | C_unshiu_00031 | 393367 | 403581 | 10215  | 1.44  | 99.45 |
| chr5 | 5154855 | 5158136 | 3282   | 0.02 | C_unshiu_00031 | 403788 | 407079 | 3292   | 0.46  | 99.09 |
| chr5 | 5157692 | 5183271 | 25580  | 0.14 | C_unshiu_00031 | 407077 | 432627 | 25551  | 3.6   | 99.47 |
| chr5 | 5183492 | 5254295 | 70804  | 0.4  | C_unshiu_00031 | 433229 | 504078 | 70850  | 9.99  | 99.71 |
| chr5 | 5254369 | 5258393 | 4025   | 0.02 | C_unshiu_00031 | 504498 | 508505 | 4008   | 0.57  | 98.56 |
| chr5 | 5258420 | 5279633 | 21214  | 0.12 | C_unshiu_00031 | 508034 | 529259 | 21226  | 2.99  | 99.66 |
| chr5 | 5280277 | 5286949 | 6673   | 0.04 | C_unshiu_00031 | 529260 | 535929 | 6670   | 0.94  | 99.09 |
| chr5 | 5286937 | 5295171 | 8235   | 0.05 | C_unshiu_00031 | 536371 | 544603 | 8233   | 1.16  | 99.85 |
| chr5 | 5295209 | 5296603 | 1395   | 0.01 | C_unshiu_00031 | 544880 | 546274 | 1395   | 0.2   | 100   |
| chr5 | 5297132 | 5334803 | 37672  | 0.21 | C_unshiu_00031 | 547118 | 584768 | 37651  | 5.31  | 99.68 |
| chr5 | 5335952 | 5337343 | 1392   | 0.01 | C_unshiu_00031 | 586304 | 587696 | 1393   | 0.2   | 99.35 |
| chr5 | 5337477 | 5346583 | 9107   | 0.05 | C_unshiu_00031 | 587889 | 597009 | 9121   | 1.29  | 99.68 |
| chr5 | 5350583 | 5380454 | 29872  | 0.17 | C_unshiu_00031 | 600315 | 630271 | 29957  | 4.22  | 99.18 |
| chr5 | 5380541 | 5404884 | 24344  | 0.14 | C_unshiu_00031 | 630580 | 655023 | 24444  | 3.45  | 99.26 |
| chr5 | 5409366 | 5426725 | 17360  | 0.1  | C_unshiu_00031 | 661452 | 678814 | 17363  | 2.45  | 99.9  |
| chr5 | 5428108 | 5456046 | 27939  | 0.16 | C_unshiu_00031 | 680641 | 708473 | 27833  | 3.92  | 99.41 |
| chr5 | 5460947 | 5468548 | 7602   | 0.04 | C_unshiu_02953 | 8538   | 939    | 7600   | 53.23 | 99.88 |
| chr5 | 5469246 | 5496642 | 27397  | 0.15 | C_unshiu_00032 | 120530 | 147929 | 27400  | 3.9   | 99.98 |
| chr5 | 5503966 | 5504994 | 1029   | 0.01 | C_unshiu_02010 | 28094  | 29122  | 1029   | 2.55  | 99.13 |
| chr5 | 5504050 | 5522367 | 18318  | 0.1  | C_unshiu_02415 | 5365   | 23740  | 18376  | 68.21 | 98.82 |
| chr5 | 5524019 | 5630166 | 106148 | 0.6  | C_unshiu_00584 | 157989 | 51824  | 106166 | 62.22 | 99.96 |
| chr5 | 5632693 | 5678743 | 46051  | 0.26 | C_unshiu_00584 | 47733  | 1682   | 46052  | 26.99 | 99.99 |
| chr5 | 5688343 | 5739601 | 51259  | 0.29 | C_unshiu_01230 | 9243   | 60500  | 51258  | 62.23 | 99.99 |
| chr5 | 5739176 | 5757999 | 18824  | 0.11 | C_unshiu_01230 | 61604  | 80427  | 18824  | 22.85 | 99.99 |
| chr5 | 5768506 | 5773470 | 4965   | 0.03 | C_unshiu_00005 | 829740 | 834702 | 4963   | 0.44  | 99.03 |
| chr5 | 5783222 | 5784488 | 1267   | 0.01 | C_unshiu_00296 | 1270   | 1      | 1270   | 0.47  | 99.76 |
| chr5 | 5784489 | 5814983 | 30495  | 0.17 | C_unshiu_00296 | 1269   | 31770  | 30502  | 11.35 | 99.93 |
| chr5 | 5819166 | 5890574 | 71409  | 0.4  | C_unshiu_00296 | 35218  | 106664 | 71447  | 26.59 | 99.94 |
| chr5 | 5890732 | 5974361 | 83630  | 0.47 | C_unshiu_00579 | 171619 | 88031  | 83589  | 48.71 | 99.92 |
| chr5 | 5976501 | 6020556 | 44056  | 0.25 | C_unshiu_00579 | 86655  | 42598  | 44058  | 25.67 | 99.99 |
| chr5 | 6018797 | 6039562 | 20766  | 0.12 | C_unshiu_00156 | 3282   | 24049  | 20768  | 5.49  | 99.99 |
| chr5 | 6040392 | 6041987 | 1596   | 0.01 | C_unshiu_00156 | 25241  | 26837  | 1597   | 0.42  | 99.81 |
| chr5 | 6044153 | 6054765 | 10613  | 0.06 | C_unshiu_00156 | 31449  | 42061  | 10613  | 2.81  | 99.95 |
| chr5 | 6054637 | 6077913 | 23277  | 0.13 | C_unshiu_00156 | 41979  | 65256  | 23278  | 6.15  | 99.99 |
| chr5 | 6078023 | 6080298 | 2276   | 0.01 | C_unshiu_00156 | 65410  | 67685  | 2276   | 0.6   | 99.6  |
| chr5 | 6080925 | 6122636 | 41712  | 0.24 | C_unshiu_00156 | 68908  | 110607 | 41700  | 11.02 | 99.97 |
| chr5 | 6102639 | 6123497 | 20859  | 0.12 | C_unshiu_00156 | 90622  | 111468 | 20847  | 5.51  | 99.94 |
| chr5 | 6123541 | 6125103 | 1563   | 0.01 | C_unshiu_00837 | 51187  | 49625  | 1563   | 1.26  | 100   |
| chr5 | 6125109 | 6152034 | 26926  | 0.15 | C_unshiu_00198 | 54992  | 81919  | 26928  | 8     | 99.96 |
| chr5 | 6151995 | 6198506 | 46512  | 0.26 | C_unshiu_00198 | 81922  | 128424 | 46503  | 13.81 | 99.86 |
| chr5 | 6203962 | 6277995 | 74034  | 0.42 | C_unshiu_00198 | 133716 | 207726 | 74011  | 21.98 | 99.57 |
| chr5 | 6278173 | 6306465 | 28293  | 0.16 | C_unshiu_00198 | 208450 | 236746 | 28297  | 8.4   | 99.95 |
| chr5 | 6312484 | 6315481 | 2998   | 0.02 | C_unshiu_00829 | 82576  | 85573  | 2998   | 2.4   | 100   |
| chr5 | 6319003 | 6320003 | 1001   | 0.01 | C_unshiu_02036 | 32501  | 31501  | 1001   | 2.55  | 99.6  |
| chr5 | 6320897 | 6322192 | 1296   | 0.01 | C_unshiu_02036 | 30336  | 29043  | 1294   | 3.3   | 99.46 |
| chr5 | 6326292 | 6332364 | 6073   | 0.03 | C_unshiu_02036 | 24947  | 18860  | 6088   | 15.51 | 98.09 |
| chr5 | 6339571 | 6348896 | 9326   | 0.05 | C_unshiu_02036 | 18179  | 8910   | 9270   | 23.62 | 98.51 |
| chr5 | 6348895 | 6352077 | 3183   | 0.02 | C_unshiu_02036 | 8804   | 5617   | 3188   | 8.12  | 99.31 |
| chr5 | 6353493 | 6354897 | 1405   | 0.01 | C_unshiu_02036 | 3323   | 1919   | 1405   | 3.58  | 100   |
| chr5 | 6357794 | 6359742 | 1949   | 0.01 | C_unshiu_02036 | 1949   | 1      | 1949   | 4.97  | 99.95 |
| chr5 | 6364251 | 6366729 | 2479   | 0.01 | C_unshiu_01065 | 1      | 2483   | 2483   | 2.51  | 99.4  |
| chr5 | 6368425 | 6376224 | 7800   | 0.04 | C_unshiu_01065 | 4570   | 12366  | 7797   | 7.88  | 99.33 |
| chr5 | 6376222 | 6396868 | 20647  | 0.12 | C_unshiu_01065 | 12759  | 33401  | 20643  | 20.86 | 99.66 |
| chr5 | 6396911 | 6407658 | 10748  | 0.06 | C_unshiu_01065 | 33515  | 44277  | 10763  | 10.87 | 99.7  |
| chr5 | 6419740 | 6422208 | 2469   | 0.01 | C_unshiu_01065 | 49288  | 51745  | 2458   | 2.48  | 98.26 |
| chr5 | 6427171 | 6429987 | 2817   | 0.02 | C_unshiu_01065 | 57181  | 59996  | 2816   | 2.85  | 99.33 |
| chr5 | 6435005 | 6436797 | 1793   | 0.01 | C_unshiu_02950 | 9201   | 7409   | 1793   | 12.34 | 99.22 |
| chr5 | 6441114 | 6443432 | 2319   | 0.01 | C_unshiu_02950 | 2318   | 1      | 2318   | 15.96 | 99.57 |
| chr5 | 6445164 | 6447849 | 2686   | 0.02 | C_unshiu_01065 | 68528  | 71213  | 2686   | 2.71  | 100   |
| chr5 | 6453197 | 6464104 | 10908  | 0.06 | C_unshiu_01065 | 98972  | 88092  | 10881  | 10.99 | 99.55 |
| chr5 | 6466426 | 6467673 | 1248   | 0.01 | C_unshiu_01440 | 57343  | 56097  | 1247   | 1.85  | 98.64 |
| chr5 | 6468132 | 6476228 | 8097   | 0.05 | C_unshiu_01440 | 49089  | 40991  | 8099   | 12.02 | 99.7  |
| chr5 | 6478890 | 6484347 | 5458   | 0.03 | C_unshiu_01440 | 30251  | 24794  | 5458   | 8.1   | 99.85 |
| chr5 | 6484368 | 6508636 | 24269  | 0.14 | C_unshiu_01440 | 24284  | 1      | 24284  | 36.03 | 99.47 |
| chr5 | 6498182 | 6517309 | 19128  | 0.11 | C_unshiu_00389 | 224398 | 205264 | 19135  | 8.49  | 99.13 |
| chr5 | 6522481 | 6546016 | 23536  | 0.13 | C_unshiu_00389 | 204215 | 180708 | 23508  | 10.43 | 98.94 |

|      |         |         |       |      |                |        |        |       |       |       |
|------|---------|---------|-------|------|----------------|--------|--------|-------|-------|-------|
| chr5 | 6546693 | 6556584 | 9892  | 0.06 | C_unshiu_01383 | 61473  | 71373  | 9901  | 13.87 | 99.52 |
| chr5 | 6576646 | 6607980 | 31335 | 0.18 | C_unshiu_01664 | 1753   | 33087  | 31335 | 57.56 | 100   |
| chr5 | 6609319 | 6610793 | 1475  | 0.01 | C_unshiu_01664 | 34942  | 36416  | 1475  | 2.71  | 100   |
| chr5 | 6610810 | 6617524 | 6715  | 0.04 | C_unshiu_01664 | 39212  | 45928  | 6717  | 12.34 | 99.64 |
| chr5 | 6617598 | 6621783 | 4186  | 0.02 | C_unshiu_01664 | 46420  | 50614  | 4195  | 7.71  | 98.86 |
| chr5 | 6659976 | 6661165 | 1190  | 0.01 | C_unshiu_00011 | 408744 | 407556 | 1189  | 0.12  | 98.32 |
| chr5 | 6659976 | 6661165 | 1190  | 0.01 | C_unshiu_00381 | 59224  | 58034  | 1191  | 0.52  | 98.24 |
| chr5 | 6668633 | 6673432 | 4800  | 0.03 | C_unshiu_02370 | 27889  | 23090  | 4800  | 17.21 | 100   |
| chr5 | 6674572 | 6678060 | 3489  | 0.02 | C_unshiu_02370 | 21864  | 18376  | 3489  | 12.51 | 99.94 |
| chr5 | 6680505 | 6688561 | 8057  | 0.05 | C_unshiu_00758 | 27621  | 35704  | 8084  | 5.99  | 98.32 |
| chr5 | 6688736 | 6693432 | 4697  | 0.03 | C_unshiu_00758 | 36620  | 41331  | 4712  | 3.49  | 98.45 |
| chr5 | 6704551 | 6707891 | 3341  | 0.02 | C_unshiu_00758 | 3336   | 1      | 3336  | 2.47  | 99.13 |
| chr5 | 6725156 | 6784479 | 59324 | 0.33 | C_unshiu_00758 | 73257  | 132613 | 59357 | 43.95 | 99.46 |
| chr5 | 6800973 | 6805396 | 4424  | 0.02 | C_unshiu_00361 | 169013 | 164561 | 4453  | 1.88  | 98.41 |
| chr5 | 6805483 | 6840328 | 34846 | 0.2  | C_unshiu_00361 | 164194 | 129363 | 34832 | 14.74 | 99.74 |
| chr5 | 6840342 | 6843037 | 2696  | 0.02 | C_unshiu_00361 | 128492 | 125794 | 2699  | 1.14  | 98.48 |
| chr5 | 6843567 | 6854612 | 11046 | 0.06 | C_unshiu_00361 | 124741 | 113694 | 11048 | 4.67  | 99.67 |
| chr5 | 6854527 | 6877468 | 22942 | 0.13 | C_unshiu_00361 | 113736 | 90855  | 22882 | 9.68  | 99.63 |
| chr5 | 6877463 | 6943976 | 66514 | 0.37 | C_unshiu_00361 | 88044  | 21527  | 66518 | 28.14 | 99.68 |
| chr5 | 6946330 | 6948550 | 2221  | 0.01 | C_unshiu_02790 | 8396   | 10615  | 2220  | 12.27 | 99.95 |
| chr5 | 6949687 | 6952263 | 2577  | 0.01 | C_unshiu_02790 | 12155  | 14731  | 2577  | 14.24 | 100   |
| chr5 | 6955501 | 6958529 | 3029  | 0.02 | C_unshiu_00361 | 15846  | 12808  | 3039  | 1.29  | 98.82 |
| chr5 | 6959386 | 6968805 | 9420  | 0.05 | C_unshiu_00361 | 10692  | 1238   | 9455  | 4     | 98.4  |
| chr5 | 6965779 | 6974385 | 8607  | 0.05 | C_unshiu_02197 | 33274  | 24660  | 8615  | 25.89 | 98.64 |
| chr5 | 6974409 | 6975814 | 1406  | 0.01 | C_unshiu_02197 | 14664  | 16070  | 1407  | 4.23  | 99.72 |
| chr5 | 6976214 | 6978280 | 2067  | 0.01 | C_unshiu_00280 | 188718 | 186652 | 2067  | 0.75  | 100   |
| chr5 | 6978274 | 6979388 | 1115  | 0.01 | C_unshiu_02197 | 18998  | 20112  | 1115  | 3.35  | 99.82 |
| chr5 | 6991581 | 6992803 | 1223  | 0.01 | C_unshiu_01646 | 27095  | 28317  | 1223  | 2.21  | 100   |
| chr5 | 6994202 | 6995272 | 1071  | 0.01 | C_unshiu_01646 | 29943  | 31014  | 1072  | 1.94  | 99.07 |
| chr5 | 6995751 | 6996890 | 1140  | 0.01 | C_unshiu_01646 | 31181  | 32320  | 1140  | 2.06  | 98.07 |
| chr5 | 6997468 | 6998767 | 1300  | 0.01 | C_unshiu_01646 | 32647  | 33946  | 1300  | 2.35  | 100   |
| chr5 | 7005853 | 7015498 | 9646  | 0.05 | C_unshiu_01646 | 40272  | 49923  | 9652  | 17.43 | 99.11 |
| chr5 | 7015516 | 7019759 | 4244  | 0.02 | C_unshiu_01646 | 50918  | 55159  | 4242  | 7.66  | 99.55 |
| chr5 | 7027687 | 7031341 | 3655  | 0.02 | C_unshiu_00110 | 415502 | 411835 | 3668  | 0.83  | 98.91 |
| chr5 | 7031998 | 7036006 | 4009  | 0.02 | C_unshiu_00110 | 411975 | 407964 | 4012  | 0.91  | 99.4  |
| chr5 | 7039373 | 7075257 | 35885 | 0.2  | C_unshiu_00110 | 405535 | 369619 | 35917 | 8.16  | 99.3  |
| chr5 | 7075340 | 7078494 | 3155  | 0.02 | C_unshiu_00110 | 366834 | 363676 | 3159  | 0.72  | 99.46 |
| chr5 | 7078485 | 7086135 | 7651  | 0.04 | C_unshiu_00110 | 362360 | 354735 | 7626  | 1.73  | 98.98 |
| chr5 | 7092708 | 7099484 | 6777  | 0.04 | C_unshiu_00110 | 342545 | 335753 | 6793  | 1.54  | 99.1  |
| chr5 | 7099476 | 7155798 | 56323 | 0.32 | C_unshiu_00110 | 335550 | 279186 | 56365 | 12.81 | 99.52 |
| chr5 | 7155350 | 7176518 | 21169 | 0.12 | C_unshiu_00110 | 278339 | 257169 | 21171 | 4.81  | 99.49 |
| chr5 | 7176769 | 7185538 | 8770  | 0.05 | C_unshiu_00110 | 256509 | 247708 | 8802  | 2     | 99.6  |
| chr5 | 7186564 | 7221922 | 35359 | 0.2  | C_unshiu_00110 | 247712 | 212491 | 35222 | 8     | 99.17 |
| chr5 | 7222260 | 7223379 | 1120  | 0.01 | C_unshiu_00110 | 212491 | 211372 | 1120  | 0.25  | 99.82 |
| chr5 | 7222295 | 7223416 | 1122  | 0.01 | C_unshiu_00685 | 111675 | 110554 | 1122  | 0.76  | 98.13 |
| chr5 | 7223523 | 7224633 | 1111  | 0.01 | C_unshiu_00110 | 211372 | 210262 | 1111  | 0.25  | 99.91 |
| chr5 | 7227253 | 7230313 | 3061  | 0.02 | C_unshiu_00361 | 21745  | 18691  | 3055  | 1.29  | 99.31 |
| chr5 | 7230494 | 7232764 | 2271  | 0.01 | C_unshiu_02790 | 15362  | 17634  | 2273  | 12.56 | 99.16 |
| chr5 | 7236462 | 7238118 | 1657  | 0.01 | C_unshiu_00361 | 12852  | 11188  | 1665  | 0.7   | 99.52 |
| chr5 | 7242102 | 7245715 | 3614  | 0.02 | C_unshiu_00660 | 50871  | 47261  | 3611  | 2.35  | 98.9  |
| chr5 | 7261876 | 7279764 | 17889 | 0.1  | C_unshiu_00422 | 107976 | 125841 | 17866 | 8.18  | 99.46 |
| chr5 | 7283771 | 7288340 | 4570  | 0.03 | C_unshiu_00422 | 131961 | 136530 | 4570  | 2.09  | 100   |
| chr5 | 7288391 | 7303877 | 15487 | 0.09 | C_unshiu_00422 | 136685 | 152176 | 15492 | 7.09  | 99.78 |
| chr5 | 7304395 | 7306441 | 2047  | 0.01 | C_unshiu_00422 | 152280 | 154311 | 2032  | 0.93  | 99.12 |
| chr5 | 7311789 | 7313102 | 1314  | 0.01 | C_unshiu_00422 | 158409 | 159723 | 1315  | 0.6   | 99.01 |
| chr5 | 7313905 | 7316986 | 3082  | 0.02 | C_unshiu_00422 | 160761 | 163849 | 3089  | 1.41  | 99.61 |
| chr5 | 7334198 | 7359855 | 25658 | 0.14 | C_unshiu_00422 | 180184 | 205827 | 25644 | 11.74 | 99.77 |
| chr5 | 7365393 | 7368603 | 3211  | 0.02 | C_unshiu_01600 | 54269  | 57471  | 3203  | 5.57  | 98.33 |
| chr5 | 7383712 | 7385946 | 2235  | 0.01 | C_unshiu_01332 | 9685   | 11919  | 2235  | 2.98  | 99.64 |
| chr5 | 7389060 | 7392495 | 3436  | 0.02 | C_unshiu_01332 | 11914  | 15348  | 3435  | 4.57  | 99.8  |
| chr5 | 7402777 | 7416873 | 14097 | 0.08 | C_unshiu_01332 | 25559  | 39583  | 14025 | 18.67 | 98.39 |
| chr5 | 7417875 | 7436841 | 18967 | 0.11 | C_unshiu_01332 | 40071  | 59087  | 19017 | 25.32 | 98.1  |
| chr5 | 7438793 | 7441822 | 3030  | 0.02 | C_unshiu_01332 | 61284  | 64313  | 3030  | 4.03  | 99.93 |
| chr5 | 7442691 | 7450017 | 7327  | 0.04 | C_unshiu_01332 | 65761  | 73056  | 7296  | 9.71  | 98.83 |
| chr5 | 7454601 | 7459754 | 5154  | 0.03 | C_unshiu_00107 | 14760  | 19924  | 5165  | 1.16  | 98.77 |
| chr5 | 7475361 | 7477826 | 2466  | 0.01 | C_unshiu_00107 | 36956  | 39421  | 2466  | 0.55  | 99.55 |
| chr5 | 7481753 | 7484355 | 2603  | 0.01 | C_unshiu_00205 | 16889  | 19495  | 2607  | 0.79  | 99.12 |
| chr5 | 7485638 | 7512519 | 26882 | 0.15 | C_unshiu_02372 | 870    | 27845  | 26976 | 96.88 | 99.06 |
| chr5 | 7516384 | 7531640 | 15257 | 0.09 | C_unshiu_00205 | 46599  | 61860  | 15262 | 4.61  | 98.84 |
| chr5 | 7531660 | 7545282 | 13623 | 0.08 | C_unshiu_00205 | 62253  | 75869  | 13617 | 4.11  | 98.98 |
| chr5 | 7557889 | 7572556 | 14668 | 0.08 | C_unshiu_00205 | 78750  | 93447  | 14698 | 4.44  | 99.44 |
| chr5 | 7572580 | 7574077 | 1498  | 0.01 | C_unshiu_00205 | 94024  | 95520  | 1497  | 0.45  | 99.53 |
| chr5 | 7576359 | 7590696 | 14338 | 0.08 | C_unshiu_00205 | 98844  | 113175 | 14332 | 4.33  | 98.45 |
| chr5 | 7591544 | 7604859 | 13316 | 0.08 | C_unshiu_00205 | 113162 | 126481 | 13320 | 4.02  | 99.45 |
| chr5 | 7610119 | 7614213 | 4095  | 0.02 | C_unshiu_00205 | 130789 | 134921 | 4133  | 1.25  | 98.04 |
| chr5 | 7614239 | 7702728 | 88490 | 0.5  | C_unshiu_00205 | 134753 | 223295 | 88543 | 26.75 | 99.4  |
| chr5 | 7704568 | 7764494 | 59927 | 0.34 | C_unshiu_00205 | 223282 | 283274 | 59993 | 18.12 | 99.6  |
| chr5 | 7764549 | 7781055 | 16507 | 0.09 | C_unshiu_00205 | 283441 | 299964 | 16524 | 4.99  | 99.62 |
| chr5 | 7782567 | 7795995 | 13429 | 0.08 | C_unshiu_00205 | 300485 | 313822 | 13338 | 4.03  | 98.81 |

|      |         |         |       |      |                |        |        |       |       |       |
|------|---------|---------|-------|------|----------------|--------|--------|-------|-------|-------|
| chr5 | 7801391 | 7802550 | 1160  | 0.01 | C_unshiu_00205 | 320057 | 321215 | 1159  | 0.35  | 99.05 |
| chr5 | 7803077 | 7806640 | 3564  | 0.02 | C_unshiu_00205 | 326501 | 322938 | 3564  | 1.08  | 99.19 |
| chr5 | 7803712 | 7807994 | 4283  | 0.02 | C_unshiu_00660 | 1138   | 5372   | 4235  | 2.75  | 98.32 |
| chr5 | 7807986 | 7810128 | 2143  | 0.01 | C_unshiu_00558 | 148078 | 145936 | 2143  | 1.22  | 100   |
| chr5 | 7810129 | 7812647 | 2519  | 0.01 | C_unshiu_00660 | 8164   | 10685  | 2522  | 1.64  | 98.89 |
| chr5 | 7823118 | 7841079 | 17962 | 0.1  | C_unshiu_00660 | 20109  | 38116  | 18008 | 11.7  | 99.06 |
| chr5 | 7846971 | 7849877 | 2907  | 0.02 | C_unshiu_00660 | 42763  | 45669  | 2907  | 1.89  | 99.45 |
| chr5 | 7849910 | 7890432 | 40523 | 0.23 | C_unshiu_00660 | 53487  | 93982  | 40496 | 26.31 | 99.54 |
| chr5 | 7890848 | 7893474 | 2627  | 0.01 | C_unshiu_00660 | 93784  | 96426  | 2643  | 1.72  | 98.6  |
| chr5 | 7895555 | 7897081 | 1527  | 0.01 | C_unshiu_02774 | 14381  | 12865  | 1517  | 8.2   | 98.5  |
| chr5 | 7897360 | 7906286 | 8927  | 0.05 | C_unshiu_02774 | 12749  | 3824   | 8926  | 48.24 | 98.4  |
| chr5 | 7908640 | 7911205 | 2566  | 0.01 | C_unshiu_01472 | 34098  | 31533  | 2566  | 3.94  | 100   |
| chr5 | 7926460 | 7928111 | 1652  | 0.01 | C_unshiu_01690 | 16729  | 15078  | 1652  | 3.12  | 100   |
| chr5 | 7928116 | 7945786 | 17671 | 0.1  | C_unshiu_02710 | 2057   | 19702  | 17646 | 89.56 | 99.15 |
| chr5 | 7938654 | 7956041 | 17388 | 0.1  | C_unshiu_00467 | 146775 | 164152 | 17378 | 8.58  | 99.01 |
| chr5 | 7960228 | 7983392 | 23165 | 0.13 | C_unshiu_00467 | 169581 | 192755 | 23175 | 11.44 | 99.7  |
| chr5 | 7985740 | 7987717 | 1978  | 0.01 | C_unshiu_00044 | 287561 | 285585 | 1977  | 0.31  | 98.28 |
| chr5 | 7991341 | 8009440 | 18100 | 0.1  | C_unshiu_00782 | 126200 | 108140 | 18061 | 13.79 | 99.53 |
| chr5 | 8013308 | 8018944 | 5637  | 0.03 | C_unshiu_00782 | 102424 | 96783  | 5642  | 4.31  | 99.68 |
| chr5 | 8020857 | 8047176 | 26320 | 0.15 | C_unshiu_00782 | 95802  | 69471  | 26332 | 20.11 | 99.59 |
| chr5 | 8048809 | 8052439 | 3631  | 0.02 | C_unshiu_00782 | 69059  | 65426  | 3634  | 2.78  | 99.72 |
| chr5 | 8052434 | 8055204 | 2771  | 0.02 | C_unshiu_00755 | 31041  | 33811  | 2771  | 2.05  | 100   |
| chr5 | 8060573 | 8065261 | 4689  | 0.03 | C_unshiu_00852 | 37286  | 41977  | 4692  | 3.83  | 99.32 |
| chr5 | 8065752 | 8070959 | 5208  | 0.03 | C_unshiu_00852 | 42358  | 47561  | 5204  | 4.25  | 99.64 |
| chr5 | 8071192 | 8072453 | 1262  | 0.01 | C_unshiu_00852 | 48095  | 49355  | 1261  | 1.03  | 98.73 |
| chr5 | 8072467 | 8084030 | 11564 | 0.07 | C_unshiu_00852 | 50409  | 61928  | 11520 | 9.4   | 98.68 |
| chr5 | 8087197 | 8097044 | 9848  | 0.06 | C_unshiu_00852 | 64466  | 74313  | 9848  | 8.04  | 99.78 |
| chr5 | 8098140 | 8105171 | 7032  | 0.04 | C_unshiu_00852 | 76410  | 83448  | 7039  | 5.74  | 99.74 |
| chr5 | 8105166 | 8106594 | 1429  | 0.01 | C_unshiu_02197 | 20107  | 21535  | 1429  | 4.29  | 100   |
| chr5 | 8106595 | 8110661 | 4067  | 0.02 | C_unshiu_00852 | 85376  | 89443  | 4068  | 3.32  | 99.78 |
| chr5 | 8110894 | 8112387 | 1494  | 0.01 | C_unshiu_00852 | 90295  | 91788  | 1494  | 1.22  | 99.67 |
| chr5 | 8135982 | 8137385 | 1404  | 0.01 | C_unshiu_00447 | 8280   | 6872   | 1409  | 0.68  | 98.79 |
| chr5 | 8137379 | 8138969 | 1591  | 0.01 | C_unshiu_00308 | 54994  | 56584  | 1591  | 0.61  | 100   |
| chr5 | 8142111 | 8152116 | 10006 | 0.06 | C_unshiu_00196 | 2460   | 12448  | 9989  | 2.94  | 98.85 |
| chr5 | 8156701 | 8170277 | 13577 | 0.08 | C_unshiu_00196 | 17881  | 31512  | 13632 | 4.02  | 98.8  |
| chr5 | 8175868 | 8177118 | 1251  | 0.01 | C_unshiu_00011 | 406935 | 405685 | 1251  | 0.13  | 98.88 |
| chr5 | 8178618 | 8224086 | 45469 | 0.26 | C_unshiu_00196 | 34234  | 79959  | 45726 | 13.48 | 98.39 |
| chr5 | 8224633 | 8235603 | 10971 | 0.06 | C_unshiu_02418 | 13963  | 2986   | 10978 | 40.83 | 99.06 |
| chr5 | 8236587 | 8258150 | 21564 | 0.12 | C_unshiu_00196 | 91921  | 113548 | 21628 | 6.37  | 98.97 |
| chr5 | 8260251 | 8265257 | 5007  | 0.03 | C_unshiu_00196 | 113037 | 118038 | 5002  | 1.47  | 98.47 |
| chr5 | 8291898 | 8294312 | 2415  | 0.01 | C_unshiu_00196 | 142053 | 144492 | 2440  | 0.72  | 98.32 |
| chr5 | 8298928 | 8306081 | 7154  | 0.04 | C_unshiu_00196 | 149379 | 156553 | 7175  | 2.11  | 98.58 |
| chr5 | 8309268 | 8323354 | 14087 | 0.08 | C_unshiu_00196 | 160554 | 174680 | 14127 | 4.16  | 99.07 |
| chr5 | 8323360 | 8324431 | 1072  | 0.01 | C_unshiu_00196 | 175654 | 176725 | 1072  | 0.32  | 99.25 |
| chr5 | 8334893 | 8346733 | 11841 | 0.07 | C_unshiu_00314 | 243243 | 231416 | 11828 | 4.57  | 99.12 |
| chr5 | 8342134 | 8348996 | 6863  | 0.04 | C_unshiu_00196 | 194225 | 201099 | 6875  | 2.03  | 98.24 |
| chr5 | 8349362 | 8350876 | 1515  | 0.01 | C_unshiu_00196 | 202019 | 203533 | 1515  | 0.45  | 99.74 |
| chr5 | 8364720 | 8380449 | 15730 | 0.09 | C_unshiu_02204 | 5785   | 21568  | 15784 | 47.74 | 99.4  |
| chr5 | 8381227 | 8383065 | 1839  | 0.01 | C_unshiu_02204 | 29580  | 31424  | 1845  | 5.58  | 99.08 |
| chr5 | 8384333 | 8389393 | 5061  | 0.03 | C_unshiu_00314 | 212185 | 207125 | 5061  | 1.96  | 99.96 |
| chr5 | 8435034 | 8437689 | 2656  | 0.01 | C_unshiu_01472 | 65105  | 62450  | 2656  | 4.08  | 99.1  |
| chr5 | 8441955 | 8446804 | 4850  | 0.03 | C_unshiu_01472 | 58586  | 53751  | 4836  | 7.43  | 98.4  |
| chr5 | 8447220 | 8449085 | 1866  | 0.01 | C_unshiu_00314 | 150259 | 148394 | 1866  | 0.72  | 100   |
| chr5 | 8449627 | 8453453 | 3827  | 0.02 | C_unshiu_00314 | 147362 | 143526 | 3837  | 1.48  | 99.24 |
| chr5 | 8455499 | 8458039 | 2541  | 0.01 | C_unshiu_00314 | 143352 | 140803 | 2550  | 0.99  | 99.45 |
| chr5 | 8458065 | 8462279 | 4215  | 0.02 | C_unshiu_00314 | 140698 | 136481 | 4218  | 1.63  | 99.48 |
| chr5 | 8465321 | 8468202 | 2882  | 0.02 | C_unshiu_01472 | 36974  | 34093  | 2882  | 4.43  | 100   |
| chr5 | 8467835 | 8486483 | 18649 | 0.11 | C_unshiu_00314 | 137021 | 118274 | 18748 | 7.24  | 98.61 |
| chr5 | 8487104 | 8537194 | 50091 | 0.28 | C_unshiu_00314 | 119039 | 68756  | 50284 | 19.43 | 98.72 |
| chr5 | 8554099 | 8559188 | 5090  | 0.03 | C_unshiu_00314 | 51819  | 46712  | 5108  | 1.97  | 98.59 |
| chr5 | 8564651 | 8578125 | 13475 | 0.08 | C_unshiu_00314 | 46491  | 33012  | 13480 | 5.21  | 98.02 |
| chr5 | 8578118 | 8582956 | 4839  | 0.03 | C_unshiu_00314 | 33219  | 28366  | 4854  | 1.88  | 99.07 |
| chr5 | 8585443 | 8587845 | 2403  | 0.01 | C_unshiu_00314 | 26910  | 24492  | 2419  | 0.93  | 98.72 |
| chr5 | 8590602 | 8592521 | 1920  | 0.01 | C_unshiu_00314 | 21867  | 19948  | 1920  | 0.74  | 100   |
| chr5 | 8617820 | 8624481 | 6662  | 0.04 | C_unshiu_01774 | 3890   | 10567  | 6678  | 13.49 | 98.34 |
| chr5 | 8628340 | 8656448 | 28109 | 0.16 | C_unshiu_01774 | 13135  | 41211  | 28077 | 56.72 | 99.47 |
| chr5 | 8656707 | 8662462 | 5756  | 0.03 | C_unshiu_01774 | 43759  | 49497  | 5739  | 11.59 | 98.41 |
| chr5 | 8662878 | 8693194 | 30317 | 0.17 | C_unshiu_01107 | 95658  | 65344  | 30315 | 31.69 | 99.85 |
| chr5 | 8698215 | 8700930 | 2716  | 0.02 | C_unshiu_01107 | 60730  | 58012  | 2719  | 2.84  | 98.65 |
| chr5 | 8704436 | 8706903 | 2468  | 0.01 | C_unshiu_01107 | 57549  | 55082  | 2468  | 2.58  | 99.8  |
| chr5 | 8710113 | 8712861 | 2749  | 0.02 | C_unshiu_01107 | 51420  | 48687  | 2734  | 2.86  | 99.27 |
| chr5 | 8720670 | 8726111 | 5442  | 0.03 | C_unshiu_01107 | 36960  | 31521  | 5440  | 5.69  | 98.56 |
| chr5 | 8729009 | 8730037 | 1029  | 0.01 | C_unshiu_01107 | 47730  | 46702  | 1029  | 1.08  | 98.64 |
| chr5 | 8731684 | 8754584 | 22901 | 0.13 | C_unshiu_01107 | 28673  | 5765   | 22909 | 23.95 | 99.86 |
| chr5 | 8763072 | 8764088 | 1017  | 0.01 | C_unshiu_00906 | 51745  | 52758  | 1014  | 0.87  | 99.61 |
| chr5 | 8765193 | 8771474 | 6282  | 0.04 | C_unshiu_00906 | 53209  | 59491  | 6283  | 5.4   | 99.98 |
| chr5 | 8775565 | 8784720 | 9156  | 0.05 | C_unshiu_01608 | 694    | 9844   | 9151  | 16.02 | 99.49 |
| chr5 | 8785577 | 8788440 | 2864  | 0.02 | C_unshiu_00906 | 67017  | 69879  | 2863  | 2.46  | 99.97 |
| chr5 | 8789455 | 8790712 | 1258  | 0.01 | C_unshiu_00575 | 161140 | 159883 | 1258  | 0.73  | 99.92 |

|      |          |          |       |      |                |        |        |       |       |       |
|------|----------|----------|-------|------|----------------|--------|--------|-------|-------|-------|
| chr5 | 8803531  | 8817507  | 13977 | 0.08 | C_unshiu_00575 | 147558 | 133510 | 14049 | 8.15  | 98.21 |
| chr5 | 8835447  | 8862528  | 27082 | 0.15 | C_unshiu_00575 | 117347 | 90061  | 27287 | 15.83 | 98.17 |
| chr5 | 8862743  | 8885736  | 22994 | 0.13 | C_unshiu_00804 | 122577 | 99576  | 23002 | 17.99 | 99.69 |
| chr5 | 8891086  | 8934183  | 43098 | 0.24 | C_unshiu_00804 | 92566  | 49508  | 43059 | 33.67 | 99.68 |
| chr5 | 8934890  | 8936373  | 1484  | 0.01 | C_unshiu_01528 | 41409  | 39926  | 1484  | 2.4   | 99.93 |
| chr5 | 8937432  | 8940591  | 3160  | 0.02 | C_unshiu_01528 | 38320  | 35160  | 3161  | 5.11  | 99.91 |
| chr5 | 8947729  | 8951041  | 3313  | 0.02 | C_unshiu_01528 | 27982  | 24669  | 3314  | 5.36  | 98.25 |
| chr5 | 8954370  | 8957822  | 3453  | 0.02 | C_unshiu_01528 | 22013  | 18565  | 3449  | 5.58  | 98.32 |
| chr5 | 8985101  | 9001432  | 16332 | 0.09 | C_unshiu_00190 | 291101 | 274681 | 16421 | 4.77  | 98.33 |
| chr5 | 9001424  | 9022311  | 20888 | 0.12 | C_unshiu_00190 | 274552 | 253585 | 20968 | 6.09  | 98.16 |
| chr5 | 9023861  | 9025882  | 2022  | 0.01 | C_unshiu_00190 | 252431 | 250416 | 2016  | 0.59  | 98.91 |
| chr5 | 9049202  | 9052174  | 2973  | 0.02 | C_unshiu_00190 | 233567 | 230582 | 2986  | 0.87  | 98.19 |
| chr5 | 9059186  | 9060969  | 1784  | 0.01 | C_unshiu_00598 | 141945 | 140162 | 1784  | 1.06  | 100   |
| chr5 | 9060963  | 9080836  | 19874 | 0.11 | C_unshiu_00190 | 223146 | 203255 | 19892 | 5.77  | 99.35 |
| chr5 | 9084461  | 9087265  | 2805  | 0.02 | C_unshiu_00190 | 197906 | 195080 | 2827  | 0.82  | 98.16 |
| chr5 | 9093347  | 9102889  | 9543  | 0.05 | C_unshiu_00190 | 189298 | 179704 | 9595  | 2.79  | 99    |
| chr5 | 9111886  | 9124866  | 12981 | 0.07 | C_unshiu_00190 | 170023 | 156935 | 13089 | 3.8   | 98.11 |
| chr5 | 9144176  | 9147280  | 3105  | 0.02 | C_unshiu_02658 | 3100   | 1      | 3100  | 14.95 | 98.33 |
| chr5 | 9156181  | 9161918  | 5738  | 0.03 | C_unshiu_00190 | 126810 | 121012 | 5799  | 1.68  | 98.45 |
| chr5 | 9162706  | 9166104  | 3399  | 0.02 | C_unshiu_00190 | 119290 | 115892 | 3399  | 0.99  | 98.04 |
| chr5 | 9181718  | 9192427  | 10710 | 0.06 | C_unshiu_00190 | 99308  | 88550  | 10759 | 3.12  | 98.62 |
| chr5 | 9193445  | 9225309  | 31865 | 0.18 | C_unshiu_00190 | 87941  | 55995  | 31947 | 9.27  | 98.67 |
| chr5 | 9225310  | 9230604  | 5295  | 0.03 | C_unshiu_00190 | 55897  | 50566  | 5332  | 1.55  | 98.69 |
| chr5 | 9230734  | 9240408  | 9675  | 0.05 | C_unshiu_00190 | 50674  | 41001  | 9674  | 2.81  | 99.32 |
| chr5 | 9240951  | 9247951  | 7001  | 0.04 | C_unshiu_00190 | 40367  | 33351  | 7017  | 2.04  | 99.17 |
| chr5 | 9251600  | 9256398  | 4799  | 0.03 | C_unshiu_00190 | 30867  | 26028  | 4840  | 1.4   | 98.39 |
| chr5 | 9256726  | 9261718  | 4993  | 0.03 | C_unshiu_00190 | 26042  | 21048  | 4995  | 1.45  | 98.84 |
| chr5 | 9261788  | 9268648  | 6861  | 0.04 | C_unshiu_00676 | 3237   | 10094  | 6858  | 4.59  | 99.43 |
| chr5 | 9269860  | 9271329  | 1470  | 0.01 | C_unshiu_00676 | 12009  | 13478  | 1470  | 0.98  | 100   |
| chr5 | 9288055  | 9311524  | 23470 | 0.13 | C_unshiu_00676 | 28300  | 51970  | 23671 | 15.85 | 98.45 |
| chr5 | 9311530  | 9315899  | 4370  | 0.02 | C_unshiu_00676 | 52469  | 56846  | 4378  | 2.93  | 98.63 |
| chr5 | 9342684  | 9352232  | 9549  | 0.05 | C_unshiu_00676 | 84476  | 93970  | 9495  | 6.36  | 98.31 |
| chr5 | 9365791  | 9370485  | 4695  | 0.03 | C_unshiu_00676 | 108053 | 112784 | 4732  | 3.17  | 98.73 |
| chr5 | 9375538  | 9388270  | 12733 | 0.07 | C_unshiu_00125 | 52893  | 65562  | 12670 | 3.03  | 98.34 |
| chr5 | 9396900  | 9403468  | 6569  | 0.04 | C_unshiu_00125 | 77122  | 83708  | 6587  | 1.57  | 98.45 |
| chr5 | 9411136  | 9413736  | 2601  | 0.01 | C_unshiu_00484 | 6522   | 9127   | 2606  | 1.32  | 99.73 |
| chr5 | 9413752  | 9425682  | 11931 | 0.07 | C_unshiu_00484 | 9786   | 21741  | 11956 | 6.07  | 98.18 |
| chr5 | 9448867  | 9454233  | 5367  | 0.03 | C_unshiu_00042 | 100483 | 105878 | 5396  | 0.84  | 98.46 |
| chr5 | 9461890  | 9489748  | 27859 | 0.16 | C_unshiu_00042 | 113701 | 141600 | 27900 | 4.35  | 98.56 |
| chr5 | 9489729  | 9495378  | 5650  | 0.03 | C_unshiu_00042 | 141497 | 147152 | 5656  | 0.88  | 98.55 |
| chr5 | 9558357  | 9589024  | 30668 | 0.17 | C_unshiu_00042 | 205280 | 236026 | 30747 | 4.8   | 98.89 |
| chr5 | 9609430  | 9613060  | 3631  | 0.02 | C_unshiu_00042 | 249101 | 252735 | 3635  | 0.57  | 99.01 |
| chr5 | 9669172  | 9670572  | 1401  | 0.01 | C_unshiu_00042 | 307150 | 308554 | 1405  | 0.22  | 99.29 |
| chr5 | 9671095  | 9674317  | 3223  | 0.02 | C_unshiu_00042 | 308583 | 311838 | 3256  | 0.51  | 98.22 |
| chr5 | 9696282  | 9717040  | 20759 | 0.12 | C_unshiu_00042 | 335454 | 356264 | 20811 | 3.25  | 98.57 |
| chr5 | 9725180  | 9752337  | 27158 | 0.15 | C_unshiu_00042 | 368291 | 395581 | 27291 | 4.26  | 98.58 |
| chr5 | 9752261  | 9761427  | 9167  | 0.05 | C_unshiu_00042 | 395625 | 404829 | 9205  | 1.44  | 98.76 |
| chr5 | 9784198  | 9798587  | 14390 | 0.08 | C_unshiu_00042 | 430401 | 444840 | 14440 | 2.25  | 98.5  |
| chr5 | 9798579  | 9810250  | 11672 | 0.07 | C_unshiu_00042 | 450135 | 461860 | 11726 | 1.83  | 98.24 |
| chr5 | 9810249  | 9821786  | 11538 | 0.07 | C_unshiu_00042 | 462447 | 474060 | 11614 | 1.81  | 98.03 |
| chr5 | 9823010  | 9836202  | 13193 | 0.07 | C_unshiu_00042 | 475161 | 488360 | 13200 | 2.06  | 99    |
| chr5 | 9842806  | 9864332  | 21527 | 0.12 | C_unshiu_00042 | 493741 | 515253 | 21513 | 3.36  | 99.03 |
| chr5 | 9864324  | 9871053  | 6730  | 0.04 | C_unshiu_00042 | 516793 | 523573 | 6781  | 1.06  | 98.69 |
| chr5 | 9871054  | 9904680  | 33627 | 0.19 | C_unshiu_00042 | 523972 | 557663 | 33692 | 5.26  | 98.88 |
| chr5 | 9916477  | 9918540  | 2064  | 0.01 | C_unshiu_00042 | 570344 | 572405 | 2062  | 0.32  | 98.84 |
| chr5 | 9918563  | 9933772  | 15210 | 0.09 | C_unshiu_00042 | 572577 | 587775 | 15199 | 2.37  | 98.13 |
| chr5 | 9933651  | 9950155  | 16505 | 0.09 | C_unshiu_00042 | 587753 | 604270 | 16518 | 2.58  | 99.27 |
| chr5 | 9963711  | 9965173  | 1463  | 0.01 | C_unshiu_00344 | 57883  | 59345  | 1463  | 0.59  | 99.79 |
| chr5 | 9965166  | 9967848  | 2683  | 0.02 | C_unshiu_00204 | 112120 | 109438 | 2683  | 0.81  | 100   |
| chr5 | 9967849  | 9968970  | 1122  | 0.01 | C_unshiu_00344 | 64276  | 65397  | 1122  | 0.45  | 100   |
| chr5 | 9969129  | 9976142  | 7014  | 0.04 | C_unshiu_00344 | 65556  | 72569  | 7014  | 2.83  | 100   |
| chr5 | 9989235  | 9991747  | 2513  | 0.01 | C_unshiu_00128 | 126565 | 129077 | 2513  | 0.61  | 100   |
| chr5 | 9998120  | 10006687 | 8568  | 0.05 | C_unshiu_03004 | 12759  | 4186   | 8574  | 67.2  | 99.84 |
| chr5 | 10007471 | 10013400 | 5930  | 0.03 | C_unshiu_00190 | 332597 | 338526 | 5930  | 1.72  | 99.92 |
| chr5 | 10014222 | 10019216 | 4995  | 0.03 | C_unshiu_02775 | 15574  | 10582  | 4993  | 27.02 | 99.82 |
| chr5 | 10018239 | 10023679 | 5441  | 0.03 | C_unshiu_01528 | 41429  | 46867  | 5439  | 8.8   | 99.01 |
| chr5 | 10024659 | 10037031 | 12373 | 0.07 | C_unshiu_01528 | 46854  | 59225  | 12372 | 20.01 | 98.48 |
| chr5 | 10036552 | 10069577 | 33026 | 0.19 | C_unshiu_00321 | 186175 | 219176 | 33002 | 12.91 | 98.22 |
| chr5 | 10069721 | 10083767 | 14047 | 0.08 | C_unshiu_00321 | 219830 | 233882 | 14053 | 5.5   | 99.79 |
| chr5 | 10083672 | 10087106 | 3435  | 0.02 | C_unshiu_00321 | 233849 | 237283 | 3435  | 1.34  | 99.74 |
| chr5 | 10085602 | 10087106 | 1505  | 0.01 | C_unshiu_00447 | 171263 | 169758 | 1506  | 0.72  | 98.54 |
| chr5 | 10088153 | 10092505 | 4353  | 0.02 | C_unshiu_00447 | 168371 | 164035 | 4337  | 2.08  | 98.71 |
| chr5 | 10093986 | 10098515 | 4530  | 0.03 | C_unshiu_00447 | 162004 | 157485 | 4520  | 2.17  | 99.34 |
| chr5 | 10095967 | 10098515 | 2549  | 0.01 | C_unshiu_00321 | 243813 | 246370 | 2558  | 1     | 98.44 |
| chr5 | 10113356 | 10115095 | 1740  | 0.01 | C_unshiu_00264 | 267177 | 268916 | 1740  | 0.61  | 100   |
| chr5 | 10130428 | 10142171 | 11744 | 0.07 | C_unshiu_00447 | 123749 | 111966 | 11784 | 5.65  | 98.26 |
| chr5 | 10140834 | 10144960 | 4127  | 0.02 | C_unshiu_02182 | 10084  | 14202  | 4119  | 12.14 | 98.57 |
| chr5 | 10157313 | 10160132 | 2820  | 0.02 | C_unshiu_02182 | 26895  | 29709  | 2815  | 8.29  | 98.97 |
| chr5 | 10160818 | 10173159 | 12342 | 0.07 | C_unshiu_00447 | 94220  | 81808  | 12413 | 5.95  | 98.63 |

|      |          |          |       |      |                |        |        |       |       |       |
|------|----------|----------|-------|------|----------------|--------|--------|-------|-------|-------|
| chr5 | 10175951 | 10202734 | 26784 | 0.15 | C_unshiu_00447 | 81743  | 54923  | 26821 | 12.85 | 98.96 |
| chr5 | 10219448 | 10229933 | 10486 | 0.06 | C_unshiu_00447 | 37490  | 26956  | 10535 | 5.05  | 98.44 |
| chr5 | 10241405 | 10243941 | 2537  | 0.01 | C_unshiu_00447 | 15849  | 13316  | 2534  | 1.21  | 98.54 |
| chr5 | 10259260 | 10272828 | 13569 | 0.08 | C_unshiu_00147 | 208308 | 194688 | 13621 | 3.49  | 98.07 |
| chr5 | 10273411 | 10287188 | 13778 | 0.08 | C_unshiu_00147 | 194468 | 180671 | 13798 | 3.54  | 98.83 |
| chr5 | 10287993 | 10300947 | 12955 | 0.07 | C_unshiu_00147 | 179360 | 166406 | 12955 | 3.32  | 100   |
| chr5 | 10300874 | 10317095 | 16222 | 0.09 | C_unshiu_00147 | 166434 | 150212 | 16223 | 4.16  | 99.97 |
| chr5 | 10319147 | 10320858 | 1712  | 0.01 | C_unshiu_00016 | 87714  | 86003  | 1712  | 0.2   | 100   |
| chr5 | 10343910 | 10351006 | 7097  | 0.04 | C_unshiu_00718 | 133078 | 125954 | 7125  | 5.04  | 98.62 |
| chr5 | 10362271 | 10367148 | 4878  | 0.03 | C_unshiu_00718 | 113110 | 108225 | 4886  | 3.45  | 99.06 |
| chr5 | 10368541 | 10388592 | 20052 | 0.11 | C_unshiu_00718 | 107203 | 87003  | 20201 | 14.28 | 98.31 |
| chr5 | 10442162 | 10445181 | 3020  | 0.02 | C_unshiu_00718 | 30105  | 27085  | 3021  | 2.14  | 99.8  |
| chr5 | 10445307 | 10465102 | 19796 | 0.11 | C_unshiu_00718 | 26810  | 6954   | 19857 | 14.04 | 98.75 |
| chr5 | 10465496 | 10472014 | 6519  | 0.04 | C_unshiu_00718 | 6523   | 1      | 6523  | 4.61  | 99.66 |
| chr5 | 10480863 | 10491057 | 10195 | 0.06 | C_unshiu_00255 | 25916  | 36210  | 10295 | 3.51  | 98.13 |
| chr5 | 10498479 | 10500430 | 1952  | 0.01 | C_unshiu_00255 | 40482  | 42428  | 1947  | 0.66  | 99.49 |
| chr5 | 10505476 | 10516087 | 10612 | 0.06 | C_unshiu_00255 | 50563  | 61295  | 10733 | 3.66  | 98.05 |
| chr5 | 10519651 | 10527740 | 8090  | 0.05 | C_unshiu_00255 | 65849  | 73994  | 8146  | 2.78  | 98.52 |
| chr5 | 10535726 | 10541187 | 5462  | 0.03 | C_unshiu_00255 | 80315  | 85802  | 5488  | 1.87  | 98.03 |
| chr5 | 10542178 | 10562621 | 20444 | 0.12 | C_unshiu_00255 | 85795  | 106290 | 20496 | 6.98  | 98.87 |
| chr5 | 10564371 | 10583619 | 19249 | 0.11 | C_unshiu_00255 | 106543 | 125788 | 19246 | 6.56  | 98.42 |
| chr5 | 10584328 | 10593707 | 9380  | 0.05 | C_unshiu_00255 | 125780 | 135178 | 9399  | 3.2   | 98.73 |
| chr5 | 10619066 | 10636137 | 17072 | 0.1  | C_unshiu_00255 | 166033 | 183197 | 17165 | 5.85  | 98.77 |
| chr5 | 10636181 | 10642282 | 6102  | 0.03 | C_unshiu_00255 | 183337 | 189445 | 6109  | 2.08  | 99.53 |
| chr5 | 10642438 | 10644870 | 2433  | 0.01 | C_unshiu_02776 | 15805  | 13360  | 2446  | 13.24 | 99.06 |
| chr5 | 10645412 | 10650465 | 5054  | 0.03 | C_unshiu_02776 | 11656  | 6604   | 5053  | 27.36 | 98.07 |
| chr5 | 10678004 | 10695348 | 17345 | 0.1  | C_unshiu_00255 | 221944 | 239421 | 17478 | 5.96  | 98.35 |
| chr5 | 10696156 | 10701125 | 4970  | 0.03 | C_unshiu_00255 | 239962 | 244952 | 4991  | 1.7   | 98.36 |
| chr5 | 10716758 | 10734320 | 17563 | 0.1  | C_unshiu_00255 | 259951 | 277587 | 17637 | 6.01  | 98.19 |
| chr5 | 10739958 | 10750630 | 10673 | 0.06 | C_unshiu_00255 | 282840 | 293448 | 10609 | 3.62  | 98.13 |
| chr5 | 10763236 | 10769056 | 5821  | 0.03 | C_unshiu_01844 | 44554  | 38719  | 5836  | 12.48 | 98.82 |
| chr5 | 10785076 | 10789286 | 4211  | 0.02 | C_unshiu_01844 | 20651  | 16409  | 4243  | 9.08  | 98.09 |
| chr5 | 10794200 | 10796797 | 2598  | 0.01 | C_unshiu_00406 | 86407  | 89010  | 2604  | 1.17  | 99.08 |
| chr5 | 10796825 | 10801671 | 4847  | 0.03 | C_unshiu_01844 | 8725   | 3868   | 4858  | 10.39 | 99.53 |
| chr5 | 10803846 | 10810156 | 6311  | 0.04 | C_unshiu_00406 | 97146  | 103471 | 6326  | 2.85  | 98.89 |
| chr5 | 10813195 | 10819090 | 5896  | 0.03 | C_unshiu_00406 | 106022 | 111976 | 5955  | 2.68  | 98.35 |
| chr5 | 10819473 | 10823170 | 3698  | 0.02 | C_unshiu_00406 | 112550 | 116257 | 3708  | 1.67  | 98.25 |
| chr5 | 10846794 | 10865986 | 19193 | 0.11 | C_unshiu_00406 | 140155 | 159336 | 19182 | 8.64  | 98.08 |
| chr5 | 10872248 | 10883788 | 11541 | 0.07 | C_unshiu_00406 | 164730 | 176317 | 11588 | 5.22  | 99.21 |
| chr5 | 10885756 | 10886978 | 1223  | 0.01 | C_unshiu_01173 | 83527  | 84751  | 1225  | 1.39  | 98.45 |
| chr5 | 10887629 | 10918013 | 30385 | 0.17 | C_unshiu_01173 | 79888  | 49544  | 30345 | 34.4  | 98.31 |
| chr5 | 10918016 | 10920355 | 2340  | 0.01 | C_unshiu_01173 | 50032  | 47688  | 2345  | 2.66  | 98.85 |
| chr5 | 10924089 | 10927212 | 3124  | 0.02 | C_unshiu_00619 | 11     | 3131   | 3121  | 1.91  | 99.62 |
| chr5 | 10927212 | 10928520 | 1309  | 0.01 | C_unshiu_00619 | 3263   | 4572   | 1310  | 0.8   | 99.08 |
| chr5 | 10928714 | 10935322 | 6609  | 0.04 | C_unshiu_01173 | 40343  | 33703  | 6641  | 7.53  | 98.81 |
| chr5 | 10934802 | 10944146 | 9345  | 0.05 | C_unshiu_01173 | 33685  | 24346  | 9340  | 10.59 | 98.8  |
| chr5 | 10946046 | 10950926 | 4881  | 0.03 | C_unshiu_00619 | 7746   | 12626  | 4881  | 2.99  | 100   |
| chr5 | 10951286 | 10955640 | 4355  | 0.02 | C_unshiu_00619 | 13426  | 17780  | 4355  | 2.67  | 99.68 |
| chr5 | 10971334 | 10975085 | 3752  | 0.02 | C_unshiu_01173 | 10310  | 6531   | 3780  | 4.28  | 98.26 |
| chr5 | 10982274 | 11000726 | 18453 | 0.1  | C_unshiu_00619 | 38803  | 57351  | 18549 | 11.36 | 98.24 |
| chr5 | 11036069 | 11044934 | 8866  | 0.05 | C_unshiu_02009 | 38347  | 29509  | 8839  | 21.87 | 98.21 |
| chr5 | 11045195 | 11047508 | 2314  | 0.01 | C_unshiu_02009 | 29142  | 26829  | 2314  | 5.72  | 99.91 |
| chr5 | 11047782 | 11054913 | 7132  | 0.04 | C_unshiu_02009 | 26003  | 18873  | 7131  | 17.64 | 99.64 |
| chr5 | 11054936 | 11057996 | 3061  | 0.02 | C_unshiu_02009 | 17809  | 14749  | 3061  | 7.57  | 99.77 |
| chr5 | 11058020 | 11063716 | 5697  | 0.03 | C_unshiu_00619 | 108208 | 113911 | 5704  | 3.49  | 99.77 |
| chr5 | 11063886 | 11065846 | 1961  | 0.01 | C_unshiu_03149 | 2971   | 1011   | 1961  | 47.84 | 100   |
| chr5 | 11069153 | 11070877 | 1725  | 0.01 | C_unshiu_00619 | 120658 | 122397 | 1740  | 1.07  | 98.05 |
| chr5 | 11073121 | 11074585 | 1465  | 0.01 | C_unshiu_03066 | 5282   | 6737   | 1456  | 13.62 | 98.1  |
| chr5 | 11085353 | 11088836 | 3484  | 0.02 | C_unshiu_00619 | 122093 | 125577 | 3485  | 2.14  | 99.91 |
| chr5 | 11096122 | 11097951 | 1830  | 0.01 | C_unshiu_00619 | 132704 | 134539 | 1836  | 1.12  | 98.69 |
| chr5 | 11097939 | 11099675 | 1737  | 0.01 | C_unshiu_01145 | 23172  | 21436  | 1737  | 1.9   | 100   |
| chr5 | 11105021 | 11111673 | 6653  | 0.04 | C_unshiu_00619 | 142782 | 149453 | 6672  | 4.09  | 98.4  |
| chr5 | 11134468 | 11140905 | 6438  | 0.04 | C_unshiu_02659 | 12839  | 6398   | 6442  | 31.11 | 98.67 |
| chr5 | 11142514 | 11147471 | 4958  | 0.03 | C_unshiu_02857 | 16611  | 11658  | 4954  | 29.82 | 99.35 |
| chr5 | 11150284 | 11153814 | 3531  | 0.02 | C_unshiu_02857 | 9898   | 6368   | 3531  | 21.26 | 99.38 |
| chr5 | 11153868 | 11155632 | 1765  | 0.01 | C_unshiu_02857 | 4177   | 2415   | 1763  | 10.61 | 98.7  |
| chr5 | 11155623 | 11156874 | 1252  | 0.01 | C_unshiu_00357 | 125475 | 124224 | 1252  | 0.53  | 99.92 |
| chr5 | 11156972 | 11159359 | 2388  | 0.01 | C_unshiu_02857 | 2402   | 1      | 2402  | 14.46 | 98.21 |
| chr5 | 11157063 | 11159935 | 2873  | 0.02 | C_unshiu_00241 | 80580  | 77689  | 2892  | 0.96  | 98.07 |
| chr5 | 11160134 | 11179198 | 19065 | 0.11 | C_unshiu_00241 | 76724  | 57615  | 19110 | 6.36  | 98.07 |
| chr5 | 11179285 | 11181652 | 2368  | 0.01 | C_unshiu_00241 | 57341  | 54973  | 2369  | 0.79  | 99.75 |
| chr5 | 11191066 | 11232780 | 41715 | 0.24 | C_unshiu_00241 | 47232  | 5634   | 41599 | 13.83 | 98.1  |
| chr5 | 11236038 | 11261012 | 24975 | 0.14 | C_unshiu_00657 | 141001 | 116046 | 24956 | 16.15 | 98.54 |
| chr5 | 11261235 | 11266190 | 4956  | 0.03 | C_unshiu_00657 | 115397 | 110446 | 4952  | 3.21  | 98.23 |
| chr5 | 11270308 | 11277772 | 7465  | 0.04 | C_unshiu_00657 | 105787 | 98327  | 7461  | 4.83  | 98.48 |
| chr5 | 11283901 | 11305030 | 21130 | 0.12 | C_unshiu_00657 | 92326  | 71136  | 21191 | 13.72 | 98.48 |
| chr5 | 11307284 | 11320882 | 13599 | 0.08 | C_unshiu_00657 | 68990  | 55329  | 13662 | 8.84  | 98.08 |
| chr5 | 11322578 | 11334011 | 11434 | 0.06 | C_unshiu_00657 | 54180  | 42713  | 11468 | 7.42  | 98.56 |
| chr5 | 11351391 | 11361021 | 9631  | 0.05 | C_unshiu_00657 | 28021  | 18349  | 9673  | 6.26  | 98.52 |

|      |          |          |       |      |                |        |        |       |       |       |
|------|----------|----------|-------|------|----------------|--------|--------|-------|-------|-------|
| chr5 | 11361518 | 11371789 | 10272 | 0.06 | C_unshiu_01016 | 101993 | 91722  | 10272 | 9.85  | 98.91 |
| chr5 | 11371798 | 11376249 | 4452  | 0.03 | C_unshiu_01016 | 90480  | 86027  | 4454  | 4.27  | 99.62 |
| chr5 | 11377109 | 11380289 | 3181  | 0.02 | C_unshiu_01016 | 85638  | 82463  | 3176  | 3.04  | 99.06 |
| chr5 | 11386935 | 11389532 | 2598  | 0.01 | C_unshiu_00657 | 5201   | 2604   | 2598  | 1.68  | 99.38 |
| chr5 | 11393507 | 11396127 | 2621  | 0.01 | C_unshiu_01016 | 81696  | 79077  | 2620  | 2.51  | 98.71 |
| chr5 | 11396132 | 11408429 | 12298 | 0.07 | C_unshiu_01016 | 78764  | 66429  | 12336 | 11.83 | 98.17 |
| chr5 | 11411532 | 11428266 | 16735 | 0.09 | C_unshiu_00088 | 466585 | 449703 | 16883 | 3.59  | 98.51 |
| chr5 | 11449249 | 11451277 | 2029  | 0.01 | C_unshiu_00088 | 398478 | 396442 | 2037  | 0.43  | 98.58 |
| chr5 | 11469169 | 11473647 | 4479  | 0.03 | C_unshiu_00553 | 177682 | 173188 | 4495  | 2.53  | 98.38 |
| chr5 | 11494251 | 11502578 | 8328  | 0.05 | C_unshiu_00088 | 354204 | 345868 | 8337  | 1.77  | 99.26 |
| chr5 | 11503352 | 11541061 | 37710 | 0.21 | C_unshiu_00088 | 345384 | 307654 | 37731 | 8.03  | 98.11 |
| chr5 | 11551322 | 11572841 | 21520 | 0.12 | C_unshiu_00088 | 301466 | 279896 | 21571 | 4.59  | 98.82 |
| chr5 | 11590762 | 11598665 | 7904  | 0.04 | C_unshiu_00088 | 260200 | 252293 | 7908  | 1.68  | 98.08 |
| chr5 | 11598943 | 11606738 | 7796  | 0.04 | C_unshiu_02407 | 19766  | 11972  | 7795  | 28.71 | 99.76 |
| chr5 | 11606754 | 11610852 | 4099  | 0.02 | C_unshiu_02407 | 41     | 4111   | 4071  | 14.99 | 98.32 |
| chr5 | 11615572 | 11621493 | 5922  | 0.03 | C_unshiu_00088 | 239278 | 233327 | 5952  | 1.27  | 98.47 |
| chr5 | 11621494 | 11625437 | 3944  | 0.02 | C_unshiu_02342 | 14686  | 10746  | 3941  | 13.82 | 98.08 |
| chr5 | 11625438 | 11629110 | 3673  | 0.02 | C_unshiu_00088 | 233331 | 229615 | 3717  | 0.79  | 98.33 |
| chr5 | 11629123 | 11643112 | 13990 | 0.08 | C_unshiu_00088 | 228559 | 214532 | 14028 | 2.98  | 98.5  |
| chr5 | 11656234 | 11686137 | 29904 | 0.17 | C_unshiu_00088 | 201450 | 171364 | 30087 | 6.4   | 98.12 |
| chr5 | 11686302 | 11694650 | 8349  | 0.05 | C_unshiu_00088 | 171312 | 162894 | 8419  | 1.79  | 98.3  |
| chr5 | 11694708 | 11696583 | 1876  | 0.01 | C_unshiu_01110 | 16515  | 18390  | 1876  | 1.98  | 99.95 |
| chr5 | 11696673 | 11710820 | 14148 | 0.08 | C_unshiu_00088 | 162588 | 148436 | 14153 | 3.01  | 99.03 |
| chr5 | 11710825 | 11727416 | 16592 | 0.09 | C_unshiu_00088 | 148328 | 131618 | 16711 | 3.56  | 98.59 |
| chr5 | 11740272 | 11746162 | 5891  | 0.03 | C_unshiu_00088 | 119299 | 113385 | 5915  | 1.26  | 99.05 |
| chr5 | 11758410 | 11762305 | 3896  | 0.02 | C_unshiu_00571 | 172750 | 168850 | 3901  | 2.26  | 99.44 |
| chr5 | 11798702 | 11807254 | 8553  | 0.05 | C_unshiu_02164 | 29136  | 20582  | 8555  | 24.77 | 98.55 |
| chr5 | 11807227 | 11812474 | 5248  | 0.03 | C_unshiu_00088 | 51913  | 46657  | 5257  | 1.12  | 99.05 |
| chr5 | 11814267 | 11819212 | 4946  | 0.03 | C_unshiu_02164 | 16798  | 11853  | 4946  | 14.32 | 100   |
| chr5 | 11819223 | 11825465 | 6243  | 0.04 | C_unshiu_02164 | 11153  | 4910   | 6244  | 18.08 | 99.86 |
| chr5 | 11826542 | 11831963 | 5422  | 0.03 | C_unshiu_00088 | 35004  | 29559  | 5446  | 1.16  | 98.26 |
| chr5 | 11848945 | 11854286 | 5342  | 0.03 | C_unshiu_00773 | 7544   | 12872  | 5329  | 4.03  | 99.14 |
| chr5 | 11854286 | 11861103 | 6818  | 0.04 | C_unshiu_00088 | 6812   | 1      | 6812  | 1.45  | 99.46 |
| chr5 | 11864060 | 11865931 | 1872  | 0.01 | C_unshiu_00570 | 22761  | 20890  | 1872  | 1.08  | 100   |
| chr5 | 11891496 | 11896229 | 4734  | 0.03 | C_unshiu_00773 | 45619  | 50359  | 4741  | 3.58  | 98.95 |
| chr5 | 11896840 | 11904542 | 7703  | 0.04 | C_unshiu_00773 | 50840  | 58549  | 7710  | 5.83  | 99.12 |
| chr5 | 11915921 | 11925125 | 9205  | 0.05 | C_unshiu_00773 | 69830  | 79113  | 9284  | 7.02  | 98.23 |
| chr5 | 11925151 | 11926644 | 1494  | 0.01 | C_unshiu_00773 | 79340  | 80835  | 1496  | 1.13  | 99.8  |
| chr5 | 11971455 | 11975919 | 4465  | 0.03 | C_unshiu_00144 | 243433 | 238996 | 4438  | 1.12  | 98.5  |
| chr5 | 11987897 | 11989232 | 1336  | 0.01 | C_unshiu_00144 | 231341 | 230000 | 1342  | 0.34  | 99.18 |
| chr5 | 12012475 | 12017556 | 5082  | 0.03 | C_unshiu_00144 | 208457 | 203356 | 5102  | 1.29  | 98.73 |
| chr5 | 12075226 | 12078452 | 3227  | 0.02 | C_unshiu_00144 | 150296 | 147053 | 3244  | 0.82  | 98.77 |
| chr5 | 12078881 | 12082380 | 3500  | 0.02 | C_unshiu_00144 | 146524 | 143007 | 3518  | 0.89  | 98.72 |
| chr5 | 12082853 | 12091884 | 9032  | 0.05 | C_unshiu_00144 | 142074 | 133032 | 9043  | 2.28  | 98.96 |
| chr5 | 12092206 | 12093312 | 1107  | 0.01 | C_unshiu_00144 | 132260 | 131154 | 1107  | 0.28  | 99.91 |
| chr5 | 12154258 | 12166870 | 12613 | 0.07 | C_unshiu_00144 | 76357  | 63802  | 12556 | 3.17  | 98.37 |
| chr5 | 12173007 | 12178581 | 5575  | 0.03 | C_unshiu_00144 | 54131  | 48532  | 5600  | 1.41  | 98.56 |
| chr5 | 12180277 | 12192556 | 12280 | 0.07 | C_unshiu_00144 | 47327  | 34987  | 12341 | 3.12  | 98.05 |
| chr5 | 12194715 | 12197935 | 3221  | 0.02 | C_unshiu_00144 | 32874  | 29645  | 3230  | 0.82  | 99.26 |
| chr5 | 12217475 | 12227786 | 10312 | 0.06 | C_unshiu_00477 | 186680 | 176317 | 10364 | 5.2   | 98.23 |
| chr5 | 12233346 | 12241962 | 8617  | 0.05 | C_unshiu_00477 | 174137 | 165524 | 8614  | 4.32  | 98.89 |
| chr5 | 12247496 | 12254148 | 6653  | 0.04 | C_unshiu_00477 | 162861 | 156218 | 6644  | 3.33  | 98.84 |
| chr5 | 12254414 | 12263645 | 9232  | 0.05 | C_unshiu_00477 | 155366 | 146123 | 9244  | 4.64  | 98.59 |
| chr5 | 12264328 | 12268351 | 4024  | 0.02 | C_unshiu_00477 | 145668 | 141648 | 4021  | 2.02  | 98.32 |
| chr5 | 12274852 | 12277151 | 2300  | 0.01 | C_unshiu_00106 | 348915 | 351214 | 2300  | 0.51  | 100   |
| chr5 | 12284382 | 12292279 | 7898  | 0.04 | C_unshiu_00477 | 123961 | 116059 | 7903  | 3.97  | 98.65 |
| chr5 | 12292764 | 12294361 | 1598  | 0.01 | C_unshiu_00477 | 110389 | 108787 | 1603  | 0.8   | 98.57 |
| chr5 | 12298545 | 12322206 | 23662 | 0.13 | C_unshiu_00477 | 106359 | 82521  | 23839 | 11.96 | 98.39 |
| chr5 | 12322291 | 12325499 | 3209  | 0.02 | C_unshiu_00060 | 83912  | 80708  | 3205  | 0.55  | 99.72 |
| chr5 | 12326393 | 12330843 | 4451  | 0.03 | C_unshiu_00060 | 77701  | 73269  | 4433  | 0.77  | 98.57 |
| chr5 | 12330998 | 12335055 | 4058  | 0.02 | C_unshiu_00060 | 73209  | 69155  | 4055  | 0.7   | 98.6  |
| chr5 | 12346619 | 12348181 | 1563  | 0.01 | C_unshiu_00255 | 192270 | 193822 | 1553  | 0.53  | 98.02 |
| chr5 | 12348548 | 12350255 | 1708  | 0.01 | C_unshiu_00255 | 195636 | 197343 | 1708  | 0.58  | 100   |
| chr5 | 12352142 | 12355640 | 3499  | 0.02 | C_unshiu_00255 | 198743 | 202236 | 3494  | 1.19  | 98.83 |
| chr5 | 12357836 | 12360559 | 2724  | 0.02 | C_unshiu_00050 | 46063  | 48782  | 2720  | 0.45  | 98.06 |
| chr5 | 12360559 | 12372423 | 11865 | 0.07 | C_unshiu_00405 | 125636 | 113751 | 11886 | 5.35  | 99.43 |
| chr5 | 12381594 | 12382934 | 1341  | 0.01 | C_unshiu_00405 | 103518 | 102178 | 1341  | 0.6   | 100   |
| chr5 | 12385610 | 12390561 | 4952  | 0.03 | C_unshiu_00405 | 98830  | 93878  | 4953  | 2.23  | 99.8  |
| chr5 | 12391272 | 12409294 | 18023 | 0.1  | C_unshiu_00405 | 92702  | 74665  | 18038 | 8.13  | 99.69 |
| chr5 | 12409059 | 12413789 | 4731  | 0.03 | C_unshiu_00405 | 73290  | 68560  | 4731  | 2.13  | 100   |
| chr5 | 12415052 | 12420251 | 5200  | 0.03 | C_unshiu_00405 | 68288  | 63089  | 5200  | 2.34  | 100   |
| chr5 | 12421671 | 12430564 | 8894  | 0.05 | C_unshiu_00405 | 61172  | 52252  | 8921  | 4.02  | 99.67 |
| chr5 | 12431760 | 12478889 | 47130 | 0.27 | C_unshiu_00405 | 50580  | 3508   | 47073 | 21.21 | 99.42 |
| chr5 | 12485247 | 12536230 | 50984 | 0.29 | C_unshiu_00638 | 155142 | 104142 | 51001 | 32.02 | 99.94 |
| chr5 | 12537444 | 12544918 | 7475  | 0.04 | C_unshiu_00638 | 101955 | 94492  | 7464  | 4.69  | 98.4  |
| chr5 | 12545688 | 12547249 | 1562  | 0.01 | C_unshiu_00638 | 93071  | 91515  | 1557  | 0.98  | 99.62 |
| chr5 | 12547253 | 12569290 | 22038 | 0.12 | C_unshiu_00638 | 89031  | 67045  | 21987 | 13.81 | 99.52 |
| chr5 | 12571388 | 12631774 | 60387 | 0.34 | C_unshiu_00638 | 65182  | 4860   | 60323 | 37.88 | 99.64 |
| chr5 | 12632587 | 12634710 | 2124  | 0.01 | C_unshiu_00127 | 129894 | 132018 | 2125  | 0.51  | 99.95 |

|      |          |          |       |      |                |        |        |       |       |       |
|------|----------|----------|-------|------|----------------|--------|--------|-------|-------|-------|
| chr5 | 12636585 | 12653365 | 16781 | 0.09 | C_unshiu_00127 | 134386 | 151210 | 16825 | 4.06  | 99.03 |
| chr5 | 12657100 | 12666699 | 9600  | 0.05 | C_unshiu_00183 | 331209 | 321610 | 9600  | 2.72  | 98.69 |
| chr5 | 12686135 | 12690845 | 4711  | 0.03 | C_unshiu_00183 | 297880 | 293145 | 4736  | 1.34  | 98.56 |
| chr5 | 12701776 | 12703400 | 1625  | 0.01 | C_unshiu_00271 | 27128  | 28752  | 1625  | 0.58  | 100   |
| chr5 | 12714061 | 12724372 | 10312 | 0.06 | C_unshiu_00183 | 272061 | 261718 | 10344 | 2.93  | 98.77 |
| chr5 | 12735176 | 12741922 | 6747  | 0.04 | C_unshiu_00183 | 242969 | 236231 | 6739  | 1.91  | 99.47 |
| chr5 | 12754555 | 12770058 | 15504 | 0.09 | C_unshiu_00183 | 222235 | 206732 | 15504 | 4.39  | 98.35 |
| chr5 | 12804662 | 12810168 | 5507  | 0.03 | C_unshiu_00183 | 172516 | 166988 | 5529  | 1.57  | 99.08 |
| chr5 | 12854769 | 12860182 | 5414  | 0.03 | C_unshiu_00183 | 129854 | 124441 | 5414  | 1.53  | 100   |
| chr5 | 12867100 | 12875126 | 8027  | 0.05 | C_unshiu_00183 | 116825 | 108759 | 8067  | 2.29  | 98.65 |
| chr5 | 12875266 | 12900110 | 24845 | 0.14 | C_unshiu_00183 | 108759 | 83857  | 24903 | 7.06  | 98.67 |
| chr5 | 12946762 | 12948761 | 2000  | 0.01 | C_unshiu_00183 | 41034  | 39035  | 2000  | 0.57  | 100   |
| chr5 | 12955981 | 12975558 | 19578 | 0.11 | C_unshiu_00183 | 30964  | 11314  | 19651 | 5.57  | 98.8  |
| chr5 | 12975545 | 12979039 | 3495  | 0.02 | C_unshiu_00183 | 11094  | 7584   | 3511  | 0.99  | 98.75 |
| chr5 | 13020390 | 13037306 | 16917 | 0.1  | C_unshiu_00430 | 50790  | 67797  | 17008 | 7.92  | 98.84 |
| chr5 | 13066389 | 13071029 | 4641  | 0.03 | C_unshiu_00430 | 97167  | 101833 | 4667  | 2.17  | 98.93 |
| chr5 | 13075863 | 13079830 | 3968  | 0.02 | C_unshiu_00430 | 105223 | 109187 | 3965  | 1.85  | 99.52 |
| chr5 | 13109521 | 13110886 | 1366  | 0.01 | C_unshiu_00430 | 136088 | 137458 | 1371  | 0.64  | 99.2  |
| chr5 | 13136609 | 13157080 | 20472 | 0.12 | C_unshiu_00430 | 165714 | 186205 | 20492 | 9.54  | 98.55 |
| chr5 | 13175427 | 13179236 | 3810  | 0.02 | C_unshiu_00278 | 43202  | 47078  | 3877  | 1.4   | 98.04 |
| chr5 | 13212664 | 13223971 | 11308 | 0.06 | C_unshiu_00278 | 76890  | 88202  | 11313 | 4.08  | 99.91 |
| chr5 | 13224770 | 13226438 | 1669  | 0.01 | C_unshiu_00278 | 89358  | 91035  | 1678  | 0.6   | 98.04 |
| chr5 | 13236558 | 13242834 | 6277  | 0.04 | C_unshiu_00278 | 97343  | 103618 | 6276  | 2.26  | 98.13 |
| chr5 | 13242993 | 13245677 | 2685  | 0.02 | C_unshiu_00278 | 103673 | 106367 | 2695  | 0.97  | 98.3  |
| chr5 | 13246320 | 13272893 | 26574 | 0.15 | C_unshiu_00278 | 106826 | 133372 | 26547 | 9.56  | 98.31 |
| chr5 | 13275814 | 13281335 | 5522  | 0.03 | C_unshiu_00278 | 134106 | 139635 | 5530  | 1.99  | 99.21 |
| chr5 | 13284055 | 13293700 | 9646  | 0.05 | C_unshiu_00278 | 142876 | 152543 | 9668  | 3.48  | 98.38 |
| chr5 | 13295255 | 13307545 | 12291 | 0.07 | C_unshiu_00278 | 153814 | 166109 | 12296 | 4.43  | 98.28 |
| chr5 | 13327133 | 13342959 | 15827 | 0.09 | C_unshiu_00278 | 183218 | 199070 | 15853 | 5.71  | 99.03 |
| chr5 | 13347992 | 13350188 | 2197  | 0.01 | C_unshiu_00278 | 204192 | 206400 | 2209  | 0.8   | 98.01 |
| chr5 | 13366708 | 13375570 | 8863  | 0.05 | C_unshiu_00278 | 223036 | 231912 | 8877  | 3.2   | 99    |
| chr5 | 13376472 | 13384539 | 8068  | 0.05 | C_unshiu_00278 | 231906 | 239960 | 8055  | 2.9   | 98.53 |
| chr5 | 13392248 | 13415848 | 23601 | 0.13 | C_unshiu_00278 | 246136 | 269749 | 23614 | 8.51  | 98.74 |
| chr5 | 13416577 | 13423207 | 6631  | 0.04 | C_unshiu_00278 | 270930 | 277593 | 6664  | 2.4   | 99.24 |
| chr5 | 13435929 | 13439879 | 3951  | 0.02 | C_unshiu_03107 | 1      | 3952   | 3952  | 43.45 | 99.87 |
| chr5 | 13441053 | 13445235 | 4183  | 0.02 | C_unshiu_02515 | 15263  | 11079  | 4185  | 17.31 | 98.64 |
| chr5 | 13441132 | 13445563 | 4432  | 0.02 | C_unshiu_03107 | 3880   | 8296   | 4417  | 48.57 | 98.45 |
| chr5 | 13467430 | 13472563 | 5134  | 0.03 | C_unshiu_00046 | 164261 | 169391 | 5131  | 0.81  | 99.51 |
| chr5 | 13488728 | 13500920 | 12193 | 0.07 | C_unshiu_00046 | 186092 | 198237 | 12146 | 1.91  | 98.24 |
| chr5 | 13504892 | 13510431 | 5540  | 0.03 | C_unshiu_00046 | 202479 | 208021 | 5543  | 0.87  | 99.95 |
| chr5 | 13553892 | 13560885 | 6994  | 0.04 | C_unshiu_00046 | 251030 | 258027 | 6998  | 1.1   | 99.67 |
| chr5 | 13580495 | 13602371 | 21877 | 0.12 | C_unshiu_00495 | 102860 | 124731 | 21872 | 11.36 | 98.72 |
| chr5 | 13631745 | 13645569 | 13825 | 0.08 | C_unshiu_00495 | 155151 | 168999 | 13849 | 7.19  | 98.02 |
| chr5 | 13656667 | 13667253 | 10587 | 0.06 | C_unshiu_00802 | 128007 | 117431 | 10577 | 8.26  | 99.1  |
| chr5 | 13664993 | 13673384 | 8392  | 0.05 | C_unshiu_00495 | 183959 | 192387 | 8429  | 4.38  | 98.7  |
| chr5 | 13674535 | 13683002 | 8468  | 0.05 | C_unshiu_00802 | 107747 | 99244  | 8504  | 6.64  | 98.92 |
| chr5 | 13696142 | 13701255 | 5114  | 0.03 | C_unshiu_00802 | 89545  | 84408  | 5138  | 4.01  | 98.64 |
| chr5 | 13701250 | 13705326 | 4077  | 0.02 | C_unshiu_00802 | 84324  | 80228  | 4097  | 3.2   | 98.73 |
| chr5 | 13732381 | 13760104 | 27724 | 0.16 | C_unshiu_00802 | 54166  | 26419  | 27748 | 21.68 | 98.14 |
| chr5 | 13777409 | 13785468 | 8060  | 0.05 | C_unshiu_00802 | 9905   | 1848   | 8058  | 6.29  | 99.38 |
| chr5 | 13785488 | 13786957 | 1470  | 0.01 | C_unshiu_00802 | 1472   | 3      | 1470  | 1.15  | 100   |
| chr5 | 13800929 | 13832875 | 31947 | 0.18 | C_unshiu_00457 | 25701  | 57777  | 32077 | 15.63 | 98.12 |
| chr5 | 13833063 | 13840330 | 7268  | 0.04 | C_unshiu_00457 | 57973  | 65251  | 7279  | 3.55  | 99.2  |
| chr5 | 13841604 | 13848923 | 7320  | 0.04 | C_unshiu_00457 | 66737  | 74060  | 7324  | 3.57  | 98.94 |
| chr5 | 13849126 | 13864592 | 15467 | 0.09 | C_unshiu_00457 | 74052  | 89563  | 15512 | 7.56  | 99.1  |
| chr5 | 13878848 | 13892617 | 13770 | 0.08 | C_unshiu_02536 | 1      | 13770  | 13770 | 58.13 | 98.81 |
| chr5 | 13892642 | 13893772 | 1131  | 0.01 | C_unshiu_02536 | 18684  | 19814  | 1131  | 4.77  | 100   |
| chr5 | 13893792 | 13895191 | 1400  | 0.01 | C_unshiu_00457 | 120355 | 121754 | 1400  | 0.68  | 99.36 |
| chr5 | 13895734 | 13897519 | 1786  | 0.01 | C_unshiu_00457 | 122950 | 124743 | 1794  | 0.87  | 99.22 |
| chr5 | 13897483 | 13904805 | 7323  | 0.04 | C_unshiu_00457 | 124775 | 132112 | 7338  | 3.57  | 98.67 |
| chr5 | 13904711 | 13906944 | 2234  | 0.01 | C_unshiu_00457 | 132292 | 134536 | 2245  | 1.09  | 98.26 |
| chr5 | 13950604 | 13954210 | 3607  | 0.02 | C_unshiu_00457 | 180263 | 183882 | 3620  | 1.76  | 98.1  |
| chr5 | 13962140 | 13966354 | 4215  | 0.02 | C_unshiu_02031 | 7616   | 11807  | 4192  | 10.61 | 98.32 |
| chr5 | 13966369 | 13976801 | 10433 | 0.06 | C_unshiu_02031 | 13320  | 23785  | 10466 | 26.48 | 99.23 |
| chr5 | 13977087 | 13981651 | 4565  | 0.03 | C_unshiu_01033 | 1      | 4567   | 4567  | 4.44  | 99.74 |
| chr5 | 13981689 | 13989181 | 7493  | 0.04 | C_unshiu_01033 | 4563   | 12067  | 7505  | 7.3   | 99.67 |
| chr5 | 13989612 | 13995604 | 5993  | 0.03 | C_unshiu_01033 | 21240  | 27250  | 6011  | 5.84  | 99.7  |
| chr5 | 13998389 | 14001384 | 2996  | 0.02 | C_unshiu_01033 | 30299  | 33306  | 3008  | 2.92  | 99.2  |
| chr5 | 14003583 | 14007778 | 4196  | 0.02 | C_unshiu_01033 | 34230  | 38426  | 4197  | 4.08  | 99.05 |
| chr5 | 14007773 | 14016447 | 8675  | 0.05 | C_unshiu_01033 | 43747  | 52434  | 8688  | 8.45  | 98.56 |
| chr5 | 14021862 | 14057315 | 35454 | 0.2  | C_unshiu_01033 | 59089  | 94639  | 35551 | 34.57 | 98.82 |
| chr5 | 14065336 | 14085571 | 20236 | 0.11 | C_unshiu_01089 | 89760  | 69435  | 20326 | 20.9  | 98.07 |
| chr5 | 14108827 | 14111334 | 2508  | 0.01 | C_unshiu_01089 | 46205  | 43695  | 2511  | 2.58  | 98.25 |
| chr5 | 14125390 | 14142086 | 16697 | 0.09 | C_unshiu_01089 | 28684  | 11900  | 16785 | 17.26 | 98.51 |
| chr5 | 14142087 | 14152945 | 10859 | 0.06 | C_unshiu_01089 | 10857  | 1      | 10857 | 11.16 | 99.43 |
| chr5 | 14155011 | 14160988 | 5978  | 0.03 | C_unshiu_01702 | 44730  | 38752  | 5979  | 11.44 | 99.21 |
| chr5 | 14162210 | 14163578 | 1369  | 0.01 | C_unshiu_01702 | 36894  | 35526  | 1369  | 2.62  | 100   |
| chr5 | 14165670 | 14178432 | 12763 | 0.07 | C_unshiu_01702 | 32513  | 19792  | 12722 | 24.34 | 98.59 |
| chr5 | 14178608 | 14179967 | 1360  | 0.01 | C_unshiu_00096 | 10653  | 12012  | 1360  | 0.3   | 100   |

|      |          |          |       |      |                |        |        |       |       |       |
|------|----------|----------|-------|------|----------------|--------|--------|-------|-------|-------|
| chr5 | 14214315 | 14216816 | 2502  | 0.01 | C_unshiu_00096 | 44942  | 47442  | 2501  | 0.54  | 98.4  |
| chr5 | 14221455 | 14232469 | 11015 | 0.06 | C_unshiu_00096 | 51578  | 62685  | 11108 | 2.41  | 98.03 |
| chr5 | 14272379 | 14277359 | 4981  | 0.03 | C_unshiu_00096 | 100430 | 105424 | 4995  | 1.08  | 99.06 |
| chr5 | 14281180 | 14289195 | 8016  | 0.05 | C_unshiu_00096 | 107782 | 115780 | 7999  | 1.74  | 98.64 |
| chr5 | 14290030 | 14301206 | 11177 | 0.06 | C_unshiu_00096 | 115774 | 126965 | 11192 | 2.43  | 98.11 |
| chr5 | 14309904 | 14311421 | 1518  | 0.01 | C_unshiu_00096 | 130130 | 131645 | 1516  | 0.33  | 98.82 |
| chr5 | 14348859 | 14359309 | 10451 | 0.06 | C_unshiu_00096 | 167842 | 178251 | 10410 | 2.26  | 98.25 |
| chr5 | 14380238 | 14383444 | 3207  | 0.02 | C_unshiu_00096 | 197096 | 200327 | 3232  | 0.7   | 99.01 |
| chr5 | 14392349 | 14401401 | 9053  | 0.05 | C_unshiu_00096 | 204911 | 213969 | 9059  | 1.97  | 98.92 |
| chr5 | 14451181 | 14465081 | 13901 | 0.08 | C_unshiu_00096 | 263551 | 277504 | 13954 | 3.03  | 98.45 |
| chr5 | 14466186 | 14472807 | 6622  | 0.04 | C_unshiu_00096 | 277372 | 283997 | 6626  | 1.44  | 99.44 |
| chr5 | 14475386 | 14491141 | 15756 | 0.09 | C_unshiu_00096 | 283646 | 299428 | 15783 | 3.42  | 98.62 |
| chr5 | 14501074 | 14503632 | 2559  | 0.01 | C_unshiu_03001 | 10388  | 12942  | 2555  | 19.74 | 99.3  |
| chr5 | 14502817 | 14528734 | 25918 | 0.15 | C_unshiu_00096 | 311914 | 337825 | 25912 | 5.62  | 98.45 |
| chr5 | 14537832 | 14548909 | 11078 | 0.06 | C_unshiu_00096 | 350848 | 361918 | 11071 | 2.4   | 98.98 |
| chr5 | 14548896 | 14566569 | 17674 | 0.1  | C_unshiu_00096 | 362260 | 379969 | 17710 | 3.84  | 98.04 |
| chr5 | 14566681 | 14582219 | 15539 | 0.09 | C_unshiu_00096 | 380075 | 395682 | 15608 | 3.39  | 98.73 |
| chr5 | 14582258 | 14585271 | 3014  | 0.02 | C_unshiu_00096 | 395643 | 398655 | 3013  | 0.65  | 99.57 |
| chr5 | 14585295 | 14589545 | 4251  | 0.02 | C_unshiu_00096 | 398829 | 403097 | 4269  | 0.93  | 98.2  |
| chr5 | 14589547 | 14601938 | 12392 | 0.07 | C_unshiu_00096 | 403947 | 416379 | 12433 | 2.7   | 99.16 |
| chr5 | 14604254 | 14607925 | 3672  | 0.02 | C_unshiu_00096 | 417622 | 421288 | 3667  | 0.8   | 98.53 |
| chr5 | 14609945 | 14611709 | 1765  | 0.01 | C_unshiu_00096 | 422741 | 424505 | 1765  | 0.38  | 100   |
| chr5 | 14611744 | 14614705 | 2962  | 0.02 | C_unshiu_00096 | 424962 | 427923 | 2962  | 0.64  | 99.09 |
| chr5 | 14621585 | 14634706 | 13122 | 0.07 | C_unshiu_00951 | 1      | 13047  | 13047 | 11.7  | 98.1  |
| chr5 | 14634708 | 14657273 | 22566 | 0.13 | C_unshiu_00951 | 13213  | 35825  | 22613 | 20.28 | 99.31 |
| chr5 | 14657265 | 14674041 | 16777 | 0.09 | C_unshiu_00951 | 35968  | 52753  | 16786 | 15.06 | 98.77 |
| chr5 | 14682523 | 14690354 | 7832  | 0.04 | C_unshiu_00951 | 61473  | 69297  | 7825  | 7.02  | 98.47 |
| chr5 | 14695586 | 14699187 | 3602  | 0.02 | C_unshiu_00951 | 75990  | 79573  | 3584  | 3.21  | 98.04 |
| chr5 | 14699220 | 14713036 | 13817 | 0.08 | C_unshiu_00054 | 25794  | 11966  | 13829 | 2.32  | 99.4  |
| chr5 | 14713627 | 14717670 | 4044  | 0.02 | C_unshiu_00054 | 9493   | 5419   | 4075  | 0.68  | 98.16 |
| chr5 | 14717859 | 14719488 | 1630  | 0.01 | C_unshiu_00951 | 94011  | 95640  | 1630  | 1.46  | 99.82 |
| chr5 | 14720329 | 14725385 | 5057  | 0.03 | C_unshiu_00951 | 97175  | 102226 | 5052  | 4.53  | 98.91 |
| chr5 | 14724040 | 14730010 | 5971  | 0.03 | C_unshiu_00013 | 734673 | 740596 | 5924  | 0.64  | 98.64 |
| chr5 | 14731092 | 14732341 | 1250  | 0.01 | C_unshiu_00951 | 102371 | 103610 | 1240  | 1.11  | 98.64 |
| chr5 | 14731508 | 14733611 | 2104  | 0.01 | C_unshiu_00013 | 741930 | 744017 | 2088  | 0.22  | 98.39 |
| chr5 | 14733627 | 14741595 | 7969  | 0.04 | C_unshiu_00013 | 745791 | 753756 | 7966  | 0.85  | 99.96 |
| chr5 | 14742364 | 14745477 | 3114  | 0.02 | C_unshiu_00013 | 754850 | 757974 | 3125  | 0.34  | 98.91 |
| chr5 | 14746494 | 14756675 | 10182 | 0.06 | C_unshiu_00013 | 757972 | 768187 | 10216 | 1.1   | 99.2  |
| chr5 | 14756685 | 14772592 | 15908 | 0.09 | C_unshiu_00013 | 768973 | 784977 | 16005 | 1.72  | 98.6  |
| chr5 | 14779202 | 14784624 | 5423  | 0.03 | C_unshiu_00013 | 784943 | 790383 | 5441  | 0.58  | 99.26 |
| chr5 | 14824806 | 14827178 | 2373  | 0.01 | C_unshiu_00013 | 829073 | 831457 | 2385  | 0.26  | 98.7  |
| chr5 | 14835813 | 14847046 | 11234 | 0.06 | C_unshiu_00013 | 840081 | 851338 | 11258 | 1.21  | 98.98 |
| chr5 | 14847044 | 14885403 | 38360 | 0.22 | C_unshiu_00013 | 851475 | 889963 | 38489 | 4.13  | 98.45 |
| chr5 | 14887508 | 14893468 | 5961  | 0.03 | C_unshiu_00013 | 892805 | 898771 | 5967  | 0.64  | 99.46 |
| chr5 | 14904244 | 14916045 | 11802 | 0.07 | C_unshiu_02837 | 5182   | 16973  | 11792 | 69.48 | 98.17 |
| chr5 | 14915775 | 14921631 | 5857  | 0.03 | C_unshiu_00889 | 1      | 5853   | 5853  | 4.94  | 99.23 |
| chr5 | 14918115 | 14921631 | 3517  | 0.02 | C_unshiu_00013 | 922579 | 926109 | 3531  | 0.38  | 98.5  |
| chr5 | 14921706 | 14926532 | 4827  | 0.03 | C_unshiu_00013 | 926975 | 931812 | 4838  | 0.52  | 99.44 |
| chr5 | 14951457 | 14956011 | 4555  | 0.03 | C_unshiu_00889 | 36468  | 41019  | 4552  | 3.85  | 98.84 |
| chr5 | 14956591 | 14960066 | 3476  | 0.02 | C_unshiu_00889 | 41330  | 44845  | 3516  | 2.97  | 98.24 |
| chr5 | 14960165 | 14961604 | 1440  | 0.01 | C_unshiu_00507 | 24039  | 25478  | 1440  | 0.76  | 100   |
| chr5 | 14962385 | 14973857 | 11473 | 0.06 | C_unshiu_00889 | 45944  | 57428  | 11485 | 9.7   | 98.06 |
| chr5 | 14992832 | 15000802 | 7971  | 0.04 | C_unshiu_00889 | 76791  | 84801  | 8011  | 6.77  | 99.2  |
| chr5 | 15001130 | 15017620 | 16491 | 0.09 | C_unshiu_00889 | 84785  | 101237 | 16453 | 13.9  | 98.06 |
| chr5 | 15017653 | 15039998 | 22346 | 0.13 | C_unshiu_00234 | 73074  | 95364  | 22291 | 7.3   | 98.93 |
| chr5 | 15047273 | 15055068 | 7796  | 0.04 | C_unshiu_00234 | 102261 | 110079 | 7819  | 2.56  | 98.2  |
| chr5 | 15055395 | 15064948 | 9554  | 0.05 | C_unshiu_00234 | 110390 | 119953 | 9564  | 3.13  | 99.26 |
| chr5 | 15077366 | 15079524 | 2159  | 0.01 | C_unshiu_00234 | 132964 | 135131 | 2168  | 0.71  | 98.3  |
| chr5 | 15081455 | 15084132 | 2678  | 0.02 | C_unshiu_00234 | 137849 | 140531 | 2683  | 0.88  | 99.33 |
| chr5 | 15084123 | 15114896 | 30774 | 0.17 | C_unshiu_00234 | 140561 | 171416 | 30856 | 10.1  | 98.38 |
| chr5 | 15114889 | 15117586 | 2698  | 0.02 | C_unshiu_00234 | 171851 | 174533 | 2683  | 0.88  | 99.07 |
| chr5 | 15193526 | 15201934 | 8409  | 0.05 | C_unshiu_00527 | 139712 | 131305 | 8408  | 4.56  | 99.94 |
| chr5 | 15201928 | 15205065 | 3138  | 0.02 | C_unshiu_02013 | 10743  | 13880  | 3138  | 7.82  | 100   |
| chr5 | 15205415 | 15210525 | 5111  | 0.03 | C_unshiu_00527 | 128781 | 123635 | 5147  | 2.79  | 98.95 |
| chr5 | 15212046 | 15225596 | 13551 | 0.08 | C_unshiu_00527 | 123106 | 109442 | 13665 | 7.41  | 98.33 |
| chr5 | 15233631 | 15247165 | 13535 | 0.08 | C_unshiu_00527 | 104258 | 90697  | 13562 | 7.35  | 98.82 |
| chr5 | 15247364 | 15257838 | 10475 | 0.06 | C_unshiu_00527 | 90710  | 80172  | 10539 | 5.71  | 98.46 |
| chr5 | 15278585 | 15280911 | 2327  | 0.01 | C_unshiu_00527 | 57694  | 55357  | 2338  | 1.27  | 98.38 |
| chr5 | 15283990 | 15306036 | 22047 | 0.12 | C_unshiu_00527 | 52543  | 30496  | 22048 | 11.95 | 99.36 |
| chr5 | 15316458 | 15318254 | 1797  | 0.01 | C_unshiu_00527 | 20361  | 18560  | 1802  | 0.98  | 99.11 |
| chr5 | 15318747 | 15330852 | 12106 | 0.07 | C_unshiu_01006 | 75897  | 63728  | 12170 | 11.58 | 98.31 |
| chr5 | 15332117 | 15344083 | 11967 | 0.07 | C_unshiu_01006 | 62447  | 50430  | 12018 | 11.43 | 98.31 |
| chr5 | 15344079 | 15346200 | 2122  | 0.01 | C_unshiu_01006 | 50213  | 48099  | 2115  | 2.01  | 98.78 |
| chr5 | 15355850 | 15357184 | 1335  | 0.01 | C_unshiu_02285 | 15232  | 13898  | 1335  | 4.42  | 99.78 |
| chr5 | 15368772 | 15371932 | 3161  | 0.02 | C_unshiu_02285 | 3177   | 1      | 3177  | 10.51 | 99.12 |
| chr5 | 15372747 | 15379190 | 6444  | 0.04 | C_unshiu_01006 | 28799  | 22363  | 6437  | 6.12  | 99.44 |
| chr5 | 15387164 | 15392552 | 5389  | 0.03 | C_unshiu_01006 | 17007  | 11630  | 5378  | 5.12  | 98.39 |
| chr5 | 15398527 | 15403756 | 5230  | 0.03 | C_unshiu_00192 | 319369 | 314095 | 5275  | 1.53  | 98.41 |
| chr5 | 15403838 | 15411047 | 7210  | 0.04 | C_unshiu_00192 | 313833 | 306621 | 7213  | 2.1   | 98.91 |

|      |          |          |       |      |                |         |         |       |       |       |
|------|----------|----------|-------|------|----------------|---------|---------|-------|-------|-------|
| chr5 | 15415922 | 15423072 | 7151  | 0.04 | C_unshiu_01637 | 48410   | 55597   | 7188  | 12.93 | 98.93 |
| chr5 | 15421362 | 15423075 | 1714  | 0.01 | C_unshiu_00192 | 298887  | 297172  | 1716  | 0.5   | 98.6  |
| chr5 | 15442673 | 15444165 | 1493  | 0.01 | C_unshiu_00192 | 291482  | 289981  | 1502  | 0.44  | 99.4  |
| chr5 | 15444160 | 15447020 | 2861  | 0.02 | C_unshiu_00277 | 156144  | 159004  | 2861  | 1.03  | 100   |
| chr5 | 15467363 | 15492386 | 25024 | 0.14 | C_unshiu_00192 | 267416  | 242297  | 25120 | 7.31  | 98.38 |
| chr5 | 15528062 | 15542571 | 14510 | 0.08 | C_unshiu_00192 | 206318  | 191797  | 14522 | 4.23  | 98.8  |
| chr5 | 15568046 | 15575465 | 7420  | 0.04 | C_unshiu_00192 | 166378  | 158973  | 7406  | 2.15  | 98.92 |
| chr5 | 15604635 | 15624639 | 20005 | 0.11 | C_unshiu_00192 | 130580  | 110509  | 20072 | 5.84  | 98.58 |
| chr5 | 15645566 | 15653510 | 7945  | 0.04 | C_unshiu_00192 | 96771   | 88806   | 7966  | 2.32  | 98.12 |
| chr5 | 15654952 | 15671515 | 16564 | 0.09 | C_unshiu_00192 | 88814   | 72224   | 16591 | 4.83  | 98.47 |
| chr5 | 15671833 | 15674895 | 3063  | 0.02 | C_unshiu_00192 | 72225   | 69167   | 3059  | 0.89  | 98.17 |
| chr5 | 15685873 | 15687971 | 2099  | 0.01 | C_unshiu_02188 | 2960    | 863     | 2098  | 6.23  | 98.67 |
| chr5 | 15688189 | 15704914 | 16726 | 0.09 | C_unshiu_00192 | 51133   | 34340   | 16794 | 4.89  | 98.28 |
| chr5 | 15706958 | 15709469 | 2512  | 0.01 | C_unshiu_00192 | 31684   | 29177   | 2508  | 0.73  | 98.34 |
| chr5 | 15711202 | 15715554 | 4353  | 0.02 | C_unshiu_00009 | 1057444 | 1053084 | 4361  | 0.41  | 98.95 |
| chr5 | 15717524 | 15727241 | 9718  | 0.05 | C_unshiu_00192 | 22262   | 12536   | 9727  | 2.83  | 99.25 |
| chr5 | 15727832 | 15731298 | 3467  | 0.02 | C_unshiu_00009 | 1042728 | 1039269 | 3460  | 0.33  | 98.59 |
| chr5 | 15727832 | 15731298 | 3467  | 0.02 | C_unshiu_00192 | 12968   | 9475    | 3494  | 1.02  | 98.31 |
| chr5 | 15736156 | 15740431 | 4276  | 0.02 | C_unshiu_00192 | 7834    | 3557    | 4278  | 1.24  | 98.95 |
| chr5 | 15746551 | 15748078 | 1528  | 0.01 | C_unshiu_00192 | 1605    | 96      | 1510  | 0.44  | 98.49 |
| chr5 | 15748945 | 15757637 | 8693  | 0.05 | C_unshiu_00009 | 1028828 | 1020110 | 8719  | 0.82  | 98.45 |
| chr5 | 15759086 | 15761620 | 2535  | 0.01 | C_unshiu_01053 | 20413   | 22947   | 2535  | 2.54  | 100   |
| chr5 | 15787305 | 15803925 | 16621 | 0.09 | C_unshiu_00009 | 991575  | 974885  | 16691 | 1.58  | 98.49 |
| chr5 | 15804067 | 15810005 | 5939  | 0.03 | C_unshiu_00009 | 974862  | 968932  | 5931  | 0.56  | 98.27 |
| chr5 | 15840985 | 15844182 | 3198  | 0.02 | C_unshiu_00009 | 934271  | 931088  | 3184  | 0.3   | 98.54 |
| chr5 | 15848194 | 15853457 | 5264  | 0.03 | C_unshiu_00009 | 928065  | 922764  | 5302  | 0.5   | 98.87 |
| chr5 | 15853572 | 15872180 | 18609 | 0.1  | C_unshiu_00009 | 924218  | 905539  | 18680 | 1.77  | 98.25 |
| chr5 | 15880725 | 15882716 | 1992  | 0.01 | C_unshiu_00009 | 891408  | 889417  | 1992  | 0.19  | 99.65 |
| chr5 | 15883251 | 15889360 | 6110  | 0.03 | C_unshiu_00009 | 889425  | 883359  | 6067  | 0.57  | 98.63 |
| chr5 | 15892564 | 15896272 | 3709  | 0.02 | C_unshiu_00009 | 880781  | 877069  | 3713  | 0.35  | 99.6  |
| chr5 | 15901483 | 15906425 | 4943  | 0.03 | C_unshiu_00009 | 872072  | 867124  | 4949  | 0.47  | 98.81 |
| chr5 | 15911241 | 15913937 | 2697  | 0.02 | C_unshiu_00009 | 863424  | 860726  | 2699  | 0.26  | 98.7  |
| chr5 | 15922775 | 15947542 | 24768 | 0.14 | C_unshiu_00009 | 859911  | 834972  | 24940 | 2.36  | 98.56 |
| chr5 | 15953923 | 15957586 | 3664  | 0.02 | C_unshiu_00009 | 828351  | 824673  | 3679  | 0.35  | 98.37 |
| chr5 | 15966423 | 15980338 | 13916 | 0.08 | C_unshiu_00009 | 811102  | 797200  | 13903 | 1.31  | 99.1  |
| chr5 | 15980959 | 16009406 | 28448 | 0.16 | C_unshiu_00009 | 795777  | 767229  | 28549 | 2.7   | 98.94 |
| chr5 | 16011683 | 16012709 | 1027  | 0.01 | C_unshiu_00249 | 262813  | 263839  | 1027  | 0.35  | 100   |
| chr5 | 16012706 | 16025864 | 13159 | 0.07 | C_unshiu_00009 | 763549  | 750361  | 13189 | 1.25  | 98.89 |
| chr5 | 16027095 | 16031983 | 4889  | 0.03 | C_unshiu_00009 | 750371  | 745486  | 4886  | 0.46  | 99.35 |
| chr5 | 16046821 | 16049808 | 2988  | 0.02 | C_unshiu_00009 | 729580  | 726581  | 3000  | 0.28  | 98.24 |
| chr5 | 16049813 | 16067579 | 17767 | 0.1  | C_unshiu_00009 | 726140  | 708307  | 17834 | 1.69  | 98.25 |
| chr5 | 16079957 | 16087284 | 7328  | 0.04 | C_unshiu_00009 | 695739  | 688422  | 7318  | 0.69  | 99.11 |
| chr5 | 16091240 | 16097825 | 6586  | 0.04 | C_unshiu_00009 | 685072  | 678493  | 6580  | 0.62  | 98.43 |
| chr5 | 16097822 | 16100626 | 2805  | 0.02 | C_unshiu_00009 | 678186  | 675360  | 2827  | 0.27  | 98.59 |
| chr5 | 16101601 | 16108499 | 6899  | 0.04 | C_unshiu_00009 | 674501  | 667576  | 6926  | 0.65  | 98.21 |
| chr5 | 16108856 | 16114948 | 6093  | 0.03 | C_unshiu_00009 | 667591  | 661481  | 6111  | 0.58  | 98.55 |
| chr5 | 16115371 | 16122934 | 7564  | 0.04 | C_unshiu_00009 | 661144  | 653550  | 7595  | 0.72  | 98.92 |
| chr5 | 16132098 | 16137115 | 5018  | 0.03 | C_unshiu_00009 | 643291  | 638262  | 5030  | 0.48  | 98.59 |
| chr5 | 16137112 | 16143175 | 6064  | 0.03 | C_unshiu_00009 | 637313  | 631252  | 6062  | 0.57  | 99.36 |
| chr5 | 16143389 | 16165004 | 21616 | 0.12 | C_unshiu_00009 | 631250  | 609610  | 21641 | 2.04  | 98.25 |
| chr5 | 16165044 | 16171904 | 6861  | 0.04 | C_unshiu_00009 | 609424  | 602529  | 6896  | 0.65  | 98.93 |
| chr5 | 16178960 | 16206731 | 27772 | 0.16 | C_unshiu_00009 | 601977  | 574127  | 27851 | 2.63  | 98.15 |
| chr5 | 16222503 | 16233128 | 10626 | 0.06 | C_unshiu_00127 | 168096  | 178747  | 10652 | 2.57  | 98.85 |
| chr5 | 16233222 | 16257413 | 24192 | 0.14 | C_unshiu_00127 | 179033  | 203238  | 24206 | 5.84  | 98.77 |
| chr5 | 16257337 | 16258951 | 1615  | 0.01 | C_unshiu_00127 | 203279  | 204912  | 1634  | 0.39  | 98.41 |
| chr5 | 16259748 | 16261217 | 1470  | 0.01 | C_unshiu_00127 | 204931  | 206423  | 1493  | 0.36  | 98.12 |
| chr5 | 16297451 | 16298957 | 1507  | 0.01 | C_unshiu_00127 | 242923  | 244430  | 1508  | 0.36  | 99.67 |
| chr5 | 16310569 | 16318127 | 7559  | 0.04 | C_unshiu_00127 | 255552  | 263116  | 7565  | 1.82  | 99.41 |
| chr5 | 16322539 | 16355297 | 32759 | 0.18 | C_unshiu_00127 | 266938  | 299636  | 32699 | 7.89  | 98.01 |
| chr5 | 16447129 | 16465877 | 18749 | 0.11 | C_unshiu_00127 | 383125  | 401877  | 18753 | 4.52  | 99.38 |
| chr5 | 16468698 | 16470658 | 1961  | 0.01 | C_unshiu_00127 | 404242  | 406186  | 1945  | 0.47  | 99.13 |
| chr5 | 16470826 | 16474062 | 3237  | 0.02 | C_unshiu_02496 | 18840   | 22077   | 3238  | 13.13 | 99.91 |
| chr5 | 16477048 | 16478194 | 1147  | 0.01 | C_unshiu_02496 | 23520   | 24648   | 1129  | 4.58  | 98.17 |
| chr5 | 16481094 | 16488882 | 7789  | 0.04 | C_unshiu_01543 | 12262   | 20059   | 7798  | 12.8  | 98.14 |
| chr5 | 16498852 | 16502391 | 3540  | 0.02 | C_unshiu_01543 | 29753   | 33342   | 3590  | 5.89  | 98.13 |
| chr5 | 16502806 | 16506092 | 3287  | 0.02 | C_unshiu_01543 | 34203   | 37483   | 3281  | 5.39  | 98.39 |
| chr5 | 16506053 | 16526389 | 20337 | 0.11 | C_unshiu_01543 | 37484   | 57872   | 20389 | 33.47 | 98.37 |
| chr5 | 16539958 | 16548349 | 8392  | 0.05 | C_unshiu_00123 | 386373  | 377925  | 8449  | 2.01  | 98    |
| chr5 | 16544757 | 16549925 | 5169  | 0.03 | C_unshiu_01654 | 32033   | 26847   | 5187  | 9.42  | 98.77 |
| chr5 | 16548910 | 16550621 | 1712  | 0.01 | C_unshiu_00123 | 377742  | 376031  | 1712  | 0.41  | 99.42 |
| chr5 | 16552391 | 16555169 | 2779  | 0.02 | C_unshiu_00123 | 373603  | 370816  | 2788  | 0.66  | 99.35 |
| chr5 | 16556868 | 16562261 | 5394  | 0.03 | C_unshiu_00123 | 368136  | 362720  | 5417  | 1.29  | 98.3  |
| chr5 | 16561620 | 16568051 | 6432  | 0.04 | C_unshiu_01654 | 6436    | 1       | 6436  | 11.69 | 99.5  |
| chr5 | 16562974 | 16574136 | 11163 | 0.06 | C_unshiu_00123 | 362670  | 351424  | 11247 | 2.68  | 98.6  |
| chr5 | 16574302 | 16593304 | 19003 | 0.11 | C_unshiu_00123 | 351239  | 332256  | 18984 | 4.52  | 98.59 |
| chr5 | 16616775 | 16628512 | 11738 | 0.07 | C_unshiu_00123 | 310232  | 298419  | 11814 | 2.81  | 98.53 |
| chr5 | 16629733 | 16638836 | 9104  | 0.05 | C_unshiu_00123 | 297218  | 288088  | 9131  | 2.17  | 98.7  |
| chr5 | 16655662 | 16669519 | 13858 | 0.08 | C_unshiu_00123 | 273010  | 259151  | 13860 | 3.3   | 98.4  |
| chr5 | 16669910 | 16680311 | 10402 | 0.06 | C_unshiu_00123 | 258781  | 248354  | 10428 | 2.48  | 98.69 |

|      |          |          |       |      |                |        |        |       |       |       |
|------|----------|----------|-------|------|----------------|--------|--------|-------|-------|-------|
| chr5 | 16686798 | 16705973 | 19176 | 0.11 | C_unshiu_00123 | 239582 | 220367 | 19216 | 4.57  | 98.61 |
| chr5 | 16708254 | 16712703 | 4450  | 0.03 | C_unshiu_00123 | 215463 | 210997 | 4467  | 1.06  | 98.35 |
| chr5 | 16712695 | 16725442 | 12748 | 0.07 | C_unshiu_00123 | 209729 | 196948 | 12782 | 3.04  | 98.32 |
| chr5 | 16725873 | 16728281 | 2409  | 0.01 | C_unshiu_00123 | 196940 | 194531 | 2410  | 0.57  | 98.67 |
| chr5 | 16730363 | 16737512 | 7150  | 0.04 | C_unshiu_00123 | 192114 | 184917 | 7198  | 1.71  | 98.69 |
| chr5 | 16755265 | 16762609 | 7345  | 0.04 | C_unshiu_00234 | 290045 | 282668 | 7378  | 2.41  | 98.65 |
| chr5 | 16802755 | 16805649 | 2895  | 0.02 | C_unshiu_00234 | 242379 | 239480 | 2900  | 0.95  | 99.28 |
| chr5 | 16805701 | 16807191 | 1491  | 0.01 | C_unshiu_00234 | 239031 | 237538 | 1494  | 0.49  | 99.8  |
| chr5 | 16808403 | 16809580 | 1178  | 0.01 | C_unshiu_00234 | 237247 | 236053 | 1195  | 0.39  | 98.16 |
| chr5 | 16860523 | 16863035 | 2513  | 0.01 | C_unshiu_00409 | 35472  | 37998  | 2527  | 1.14  | 99.01 |
| chr5 | 16868030 | 16872720 | 4691  | 0.03 | C_unshiu_00409 | 43734  | 48458  | 4725  | 2.13  | 98.2  |
| chr5 | 16873397 | 16898817 | 25421 | 0.14 | C_unshiu_00409 | 48153  | 73572  | 25420 | 11.48 | 98.39 |
| chr5 | 16899633 | 16913898 | 14266 | 0.08 | C_unshiu_00409 | 73651  | 87936  | 14286 | 6.45  | 98.96 |
| chr5 | 16942724 | 16966622 | 23899 | 0.13 | C_unshiu_00409 | 118462 | 142360 | 23899 | 10.79 | 99.04 |
| chr5 | 16967162 | 16974639 | 7478  | 0.04 | C_unshiu_00409 | 143428 | 150950 | 7523  | 3.4   | 98.74 |
| chr5 | 16975595 | 16978463 | 2869  | 0.02 | C_unshiu_00409 | 151432 | 154304 | 2873  | 1.3   | 99.3  |
| chr5 | 16979205 | 16982115 | 2911  | 0.02 | C_unshiu_00409 | 155207 | 158099 | 2893  | 1.31  | 98.32 |
| chr5 | 16981580 | 16983851 | 2272  | 0.01 | C_unshiu_00409 | 158101 | 160378 | 2278  | 1.03  | 99.12 |
| chr5 | 16986363 | 16994289 | 7927  | 0.04 | C_unshiu_00409 | 161870 | 169797 | 7928  | 3.58  | 99.47 |
| chr5 | 17012925 | 17014139 | 1215  | 0.01 | C_unshiu_01461 | 25144  | 23930  | 1215  | 1.84  | 100   |
| chr5 | 17024113 | 17026183 | 2071  | 0.01 | C_unshiu_00409 | 193276 | 195345 | 2070  | 0.93  | 99.42 |
| chr5 | 17033732 | 17039680 | 5949  | 0.03 | C_unshiu_01461 | 5978   | 1      | 5978  | 9.07  | 98.03 |
| chr5 | 17046300 | 17057209 | 10910 | 0.06 | C_unshiu_00623 | 16360  | 27253  | 10894 | 6.71  | 98.09 |
| chr5 | 17065014 | 17084073 | 19060 | 0.11 | C_unshiu_00623 | 34220  | 53293  | 19074 | 11.75 | 98.42 |
| chr5 | 17084365 | 17085794 | 1430  | 0.01 | C_unshiu_00502 | 94089  | 92660  | 1430  | 0.75  | 100   |
| chr5 | 17167791 | 17184719 | 16929 | 0.1  | C_unshiu_00623 | 136551 | 153538 | 16988 | 10.47 | 98.62 |
| chr5 | 17185552 | 17186779 | 1228  | 0.01 | C_unshiu_00623 | 154467 | 155694 | 1228  | 0.76  | 98.05 |
| chr5 | 17216654 | 17223426 | 6773  | 0.04 | C_unshiu_00249 | 117297 | 124077 | 6781  | 2.29  | 98.32 |
| chr5 | 17233077 | 17235102 | 2026  | 0.01 | C_unshiu_02579 | 1      | 2026   | 2026  | 8.98  | 99.75 |
| chr5 | 17239209 | 17242426 | 3218  | 0.02 | C_unshiu_02579 | 4186   | 7427   | 3242  | 14.37 | 98.27 |
| chr5 | 17249072 | 17287540 | 38469 | 0.22 | C_unshiu_00249 | 151670 | 190374 | 38705 | 13.08 | 98.12 |
| chr5 | 17282348 | 17292830 | 10483 | 0.06 | C_unshiu_00370 | 1      | 10495  | 10495 | 4.51  | 99.23 |
| chr5 | 17327433 | 17344578 | 17146 | 0.1  | C_unshiu_00370 | 45131  | 62327  | 17197 | 7.39  | 98.47 |
| chr5 | 17352893 | 17356485 | 3593  | 0.02 | C_unshiu_00370 | 68008  | 71606  | 3599  | 1.55  | 99.47 |
| chr5 | 17374822 | 17376842 | 2021  | 0.01 | C_unshiu_02421 | 14745  | 12725  | 2021  | 7.53  | 99.16 |
| chr5 | 17377775 | 17380337 | 2563  | 0.01 | C_unshiu_00370 | 84920  | 87482  | 2563  | 1.1   | 100   |
| chr5 | 17402644 | 17408434 | 5791  | 0.03 | C_unshiu_00370 | 112252 | 118074 | 5823  | 2.5   | 98.56 |
| chr5 | 17446555 | 17455029 | 8475  | 0.05 | C_unshiu_00370 | 156433 | 164888 | 8456  | 3.64  | 98.81 |
| chr5 | 17465311 | 17477728 | 12418 | 0.07 | C_unshiu_00370 | 168798 | 181210 | 12413 | 5.34  | 98.56 |
| chr5 | 17477723 | 17480619 | 2897  | 0.02 | C_unshiu_00370 | 181435 | 184328 | 2894  | 1.24  | 98.59 |
| chr5 | 17481831 | 17510444 | 28614 | 0.16 | C_unshiu_00370 | 186792 | 215504 | 28713 | 12.34 | 98.94 |
| chr5 | 17518650 | 17519977 | 1328  | 0.01 | C_unshiu_00356 | 223363 | 222036 | 1328  | 0.56  | 100   |
| chr5 | 17519971 | 17528990 | 9020  | 0.05 | C_unshiu_02330 | 1312   | 10380  | 9069  | 31.42 | 98.09 |
| chr5 | 17529547 | 17530697 | 1151  | 0.01 | C_unshiu_01422 | 4090   | 5250   | 1161  | 1.68  | 98.36 |
| chr5 | 17530698 | 17544842 | 14145 | 0.08 | C_unshiu_02330 | 12339  | 26459  | 14121 | 48.92 | 99.17 |
| chr5 | 17582513 | 17585143 | 2631  | 0.01 | C_unshiu_02257 | 1      | 2631   | 2631  | 8.38  | 98.26 |
| chr5 | 17585792 | 17589358 | 3567  | 0.02 | C_unshiu_02257 | 2819   | 6357   | 3539  | 11.27 | 98.46 |
| chr5 | 17599762 | 17601198 | 1437  | 0.01 | C_unshiu_02510 | 24423  | 22993  | 1431  | 5.86  | 98.4  |
| chr5 | 17602462 | 17612525 | 10064 | 0.06 | C_unshiu_02510 | 22157  | 12051  | 10107 | 41.38 | 98.09 |
| chr5 | 17609825 | 17625649 | 15825 | 0.09 | C_unshiu_01514 | 57342  | 41454  | 15889 | 25.44 | 98.39 |
| chr5 | 17625637 | 17628358 | 2722  | 0.02 | C_unshiu_01514 | 41330  | 38610  | 2721  | 4.36  | 98.28 |
| chr5 | 17629581 | 17634436 | 4856  | 0.03 | C_unshiu_00106 | 368059 | 372895 | 4837  | 1.07  | 98.99 |
| chr5 | 17637952 | 17665490 | 27539 | 0.16 | C_unshiu_01514 | 27598  | 1      | 27598 | 44.18 | 98.3  |
| chr5 | 17676443 | 17678920 | 2478  | 0.01 | C_unshiu_00106 | 413422 | 415898 | 2477  | 0.55  | 99.44 |
| chr5 | 17680329 | 17694933 | 14605 | 0.08 | C_unshiu_00106 | 416116 | 430671 | 14556 | 3.23  | 98.48 |
| chr5 | 17699821 | 17703117 | 3297  | 0.02 | C_unshiu_00106 | 434268 | 437560 | 3293  | 0.73  | 99.06 |
| chr5 | 17715646 | 17716799 | 1154  | 0.01 | C_unshiu_01212 | 81545  | 80382  | 1164  | 1.38  | 98.11 |
| chr5 | 17718571 | 17725491 | 6921  | 0.04 | C_unshiu_01212 | 79798  | 72876  | 6923  | 8.22  | 98.75 |
| chr5 | 17727490 | 17731170 | 3681  | 0.02 | C_unshiu_01212 | 71955  | 68281  | 3675  | 4.36  | 99.29 |
| chr5 | 17732484 | 17734045 | 1562  | 0.01 | C_unshiu_00128 | 276164 | 274603 | 1562  | 0.38  | 100   |
| chr6 | 5927     | 8539     | 2613  | 0.01 | C_unshiu_01413 | 1116   | 3708   | 2593  | 3.7   | 99.16 |
| chr6 | 11499    | 19449    | 7951  | 0.05 | C_unshiu_02792 | 616    | 8453   | 7838  | 43.37 | 98.42 |
| chr6 | 21082    | 22091    | 1010  | 0.01 | C_unshiu_00145 | 240127 | 239118 | 1010  | 0.26  | 99.41 |
| chr6 | 21743    | 36053    | 14311 | 0.08 | C_unshiu_01338 | 40235  | 54537  | 14303 | 19.17 | 99.8  |
| chr6 | 61168    | 69884    | 8717  | 0.05 | C_unshiu_01100 | 13187  | 4469   | 8719  | 9.08  | 99.95 |
| chr6 | 70818    | 72403    | 1586  | 0.01 | C_unshiu_01100 | 2785   | 1200   | 1586  | 1.65  | 100   |
| chr6 | 88000    | 91505    | 3506  | 0.02 | C_unshiu_01347 | 74060  | 70555  | 3506  | 4.72  | 100   |
| chr6 | 91889    | 96451    | 4563  | 0.03 | C_unshiu_01347 | 69687  | 65125  | 4563  | 6.15  | 99.96 |
| chr6 | 103971   | 106091   | 2121  | 0.01 | C_unshiu_01074 | 50962  | 48841  | 2122  | 2.15  | 99.81 |
| chr6 | 108883   | 116342   | 7460  | 0.04 | C_unshiu_01074 | 46312  | 38823  | 7490  | 7.6   | 98.77 |
| chr6 | 121548   | 122600   | 1053  | 0.01 | C_unshiu_03147 | 3703   | 4755   | 1053  | 22.15 | 100   |
| chr6 | 130553   | 145046   | 14494 | 0.08 | C_unshiu_00549 | 116093 | 101655 | 14439 | 8.08  | 98.53 |
| chr6 | 139883   | 146669   | 6787  | 0.04 | C_unshiu_01074 | 19161  | 12342  | 6820  | 6.92  | 98.04 |
| chr6 | 148243   | 149560   | 1318  | 0.01 | C_unshiu_01074 | 6408   | 5092   | 1317  | 1.34  | 99.24 |
| chr6 | 150940   | 154302   | 3363  | 0.02 | C_unshiu_01074 | 3336   | 1      | 3336  | 3.39  | 98.43 |
| chr6 | 159084   | 162846   | 3763  | 0.02 | C_unshiu_00549 | 89104  | 85325  | 3780  | 2.11  | 98.49 |
| chr6 | 164678   | 165709   | 1032  | 0.01 | C_unshiu_00549 | 85216  | 84186  | 1031  | 0.58  | 99.13 |
| chr6 | 173163   | 181418   | 8256  | 0.05 | C_unshiu_00549 | 77459  | 69200  | 8260  | 4.62  | 98.99 |
| chr6 | 196455   | 198243   | 1789  | 0.01 | C_unshiu_00549 | 53307  | 51517  | 1791  | 1     | 99.5  |

|      |         |         |       |      |                |        |        |       |       |       |
|------|---------|---------|-------|------|----------------|--------|--------|-------|-------|-------|
| chr6 | 223884  | 227572  | 3689  | 0.02 | C_unshiu_00549 | 31762  | 28067  | 3696  | 2.07  | 98.67 |
| chr6 | 227564  | 235771  | 8208  | 0.05 | C_unshiu_00549 | 21054  | 12856  | 8199  | 4.59  | 98.56 |
| chr6 | 235765  | 250901  | 15137 | 0.09 | C_unshiu_00204 | 30766  | 15589  | 15178 | 4.56  | 98.96 |
| chr6 | 251068  | 261804  | 10737 | 0.06 | C_unshiu_00204 | 15566  | 4775   | 10792 | 3.24  | 98.38 |
| chr6 | 263299  | 265058  | 1760  | 0.01 | C_unshiu_00204 | 2560   | 802    | 1759  | 0.53  | 98.69 |
| chr6 | 312519  | 327070  | 14552 | 0.08 | C_unshiu_00239 | 225542 | 210995 | 14548 | 4.8   | 99.51 |
| chr6 | 327351  | 329772  | 2422  | 0.01 | C_unshiu_00931 | 5933   | 8339   | 2407  | 2.12  | 98.31 |
| chr6 | 359027  | 361002  | 1976  | 0.01 | C_unshiu_02250 | 29395  | 31369  | 1975  | 6.22  | 99.9  |
| chr6 | 361003  | 365731  | 4729  | 0.03 | C_unshiu_02250 | 29400  | 24672  | 4729  | 14.89 | 99.96 |
| chr6 | 365737  | 370393  | 4657  | 0.03 | C_unshiu_02250 | 24337  | 19681  | 4657  | 14.67 | 100   |
| chr6 | 370390  | 377414  | 7025  | 0.04 | C_unshiu_02250 | 19623  | 12597  | 7027  | 22.13 | 99.97 |
| chr6 | 383376  | 387958  | 4583  | 0.03 | C_unshiu_01169 | 88406  | 83824  | 4583  | 5.18  | 99.85 |
| chr6 | 388068  | 395610  | 7543  | 0.04 | C_unshiu_01169 | 83659  | 76156  | 7504  | 8.49  | 98.25 |
| chr6 | 397448  | 408098  | 10651 | 0.06 | C_unshiu_01169 | 75702  | 64940  | 10763 | 12.17 | 98.6  |
| chr6 | 414500  | 418511  | 4012  | 0.02 | C_unshiu_01169 | 65003  | 60986  | 4018  | 4.54  | 99.38 |
| chr6 | 435938  | 437375  | 1438  | 0.01 | C_unshiu_01169 | 45199  | 43762  | 1438  | 1.63  | 99.65 |
| chr6 | 454270  | 462498  | 8229  | 0.05 | C_unshiu_01169 | 25175  | 16941  | 8235  | 9.31  | 98.46 |
| chr6 | 471051  | 472294  | 1244  | 0.01 | C_unshiu_00892 | 50670  | 49427  | 1244  | 1.06  | 100   |
| chr6 | 482669  | 484075  | 1407  | 0.01 | C_unshiu_00732 | 61305  | 62711  | 1407  | 1.02  | 100   |
| chr6 | 484885  | 486969  | 2085  | 0.01 | C_unshiu_00267 | 154003 | 156095 | 2093  | 0.74  | 98.66 |
| chr6 | 491646  | 495256  | 3611  | 0.02 | C_unshiu_02597 | 17791  | 14181  | 3611  | 16.3  | 99.56 |
| chr6 | 495492  | 504400  | 8909  | 0.05 | C_unshiu_00267 | 162318 | 171208 | 8891  | 3.15  | 98.26 |
| chr6 | 499592  | 509783  | 10192 | 0.06 | C_unshiu_02597 | 11722  | 1550   | 10173 | 45.91 | 98.55 |
| chr6 | 520718  | 524689  | 3972  | 0.02 | C_unshiu_00164 | 254517 | 258486 | 3970  | 1.07  | 99.02 |
| chr6 | 525379  | 529707  | 4329  | 0.02 | C_unshiu_00267 | 190673 | 194990 | 4318  | 1.53  | 98.5  |
| chr6 | 530249  | 532937  | 2689  | 0.02 | C_unshiu_00164 | 266240 | 268949 | 2710  | 0.73  | 98.82 |
| chr6 | 536968  | 545637  | 8670  | 0.05 | C_unshiu_00267 | 197479 | 206209 | 8731  | 3.09  | 98.84 |
| chr6 | 547082  | 551152  | 4071  | 0.02 | C_unshiu_00267 | 207099 | 211173 | 4075  | 1.44  | 98.75 |
| chr6 | 555663  | 558309  | 2647  | 0.01 | C_unshiu_00267 | 216136 | 218760 | 2625  | 0.93  | 98.04 |
| chr6 | 563100  | 578401  | 15302 | 0.09 | C_unshiu_01797 | 48532  | 33250  | 15283 | 31.49 | 99.82 |
| chr6 | 578497  | 594602  | 16106 | 0.09 | C_unshiu_01797 | 33137  | 17044  | 16094 | 33.16 | 98.88 |
| chr6 | 591394  | 594924  | 3531  | 0.02 | C_unshiu_01387 | 71213  | 67676  | 3538  | 4.97  | 98.96 |
| chr6 | 595318  | 596652  | 1335  | 0.01 | C_unshiu_01797 | 16983  | 15648  | 1336  | 2.75  | 99.03 |
| chr6 | 598969  | 601118  | 2150  | 0.01 | C_unshiu_01387 | 63089  | 60940  | 2150  | 3.02  | 99.53 |
| chr6 | 601129  | 602938  | 1810  | 0.01 | C_unshiu_01797 | 13097  | 11288  | 1810  | 3.73  | 100   |
| chr6 | 603434  | 605976  | 2543  | 0.01 | C_unshiu_01797 | 10548  | 8005   | 2544  | 5.24  | 99.29 |
| chr6 | 606387  | 609900  | 3514  | 0.02 | C_unshiu_01387 | 55996  | 52483  | 3514  | 4.93  | 100   |
| chr6 | 618756  | 620747  | 1992  | 0.01 | C_unshiu_01387 | 46667  | 44678  | 1990  | 2.79  | 99.45 |
| chr6 | 622329  | 645245  | 22917 | 0.13 | C_unshiu_01387 | 42506  | 19589  | 22918 | 32.18 | 99.36 |
| chr6 | 647991  | 650081  | 2091  | 0.01 | C_unshiu_01092 | 27025  | 29117  | 2093  | 2.16  | 99.81 |
| chr6 | 650307  | 653184  | 2878  | 0.02 | C_unshiu_01092 | 30343  | 33220  | 2878  | 2.97  | 99.44 |
| chr6 | 661991  | 664504  | 2514  | 0.01 | C_unshiu_00519 | 1      | 2506   | 2506  | 1.35  | 99.28 |
| chr6 | 665313  | 670852  | 5540  | 0.03 | C_unshiu_00519 | 3713   | 9234   | 5522  | 2.98  | 98.15 |
| chr6 | 671351  | 672863  | 1513  | 0.01 | C_unshiu_00519 | 18487  | 19998  | 1512  | 0.81  | 99.01 |
| chr6 | 676380  | 686341  | 9962  | 0.06 | C_unshiu_00519 | 25755  | 35713  | 9959  | 5.37  | 99.34 |
| chr6 | 681317  | 686346  | 5030  | 0.03 | C_unshiu_00784 | 33123  | 38140  | 5018  | 3.84  | 98    |
| chr6 | 690324  | 704092  | 13769 | 0.08 | C_unshiu_00519 | 35051  | 48832  | 13782 | 7.43  | 99.52 |
| chr6 | 704265  | 715966  | 11702 | 0.07 | C_unshiu_00519 | 49408  | 61139  | 11732 | 6.32  | 99.3  |
| chr6 | 721995  | 742034  | 20040 | 0.11 | C_unshiu_00519 | 67991  | 88069  | 20079 | 10.82 | 98.95 |
| chr6 | 742044  | 745907  | 3864  | 0.02 | C_unshiu_00519 | 88203  | 92070  | 3868  | 2.08  | 99.12 |
| chr6 | 745904  | 756676  | 10773 | 0.06 | C_unshiu_00519 | 92123  | 102928 | 10806 | 5.82  | 99.2  |
| chr6 | 796187  | 807366  | 11180 | 0.06 | C_unshiu_00519 | 143609 | 154804 | 11196 | 6.03  | 99.22 |
| chr6 | 814222  | 819995  | 5774  | 0.03 | C_unshiu_02508 | 5778   | 1      | 5778  | 23.63 | 98.55 |
| chr6 | 814485  | 821356  | 6872  | 0.04 | C_unshiu_00519 | 164961 | 171798 | 6838  | 3.68  | 98.6  |
| chr6 | 826297  | 830319  | 4023  | 0.02 | C_unshiu_01312 | 66457  | 70503  | 4047  | 5.32  | 98.79 |
| chr6 | 858471  | 859851  | 1381  | 0.01 | C_unshiu_00057 | 565710 | 564330 | 1381  | 0.23  | 99.2  |
| chr6 | 859852  | 861917  | 2066  | 0.01 | C_unshiu_02167 | 20261  | 22326  | 2066  | 5.99  | 100   |
| chr6 | 861908  | 871842  | 9935  | 0.06 | C_unshiu_02853 | 14215  | 4279   | 9937  | 59.69 | 99.86 |
| chr6 | 871914  | 873104  | 1191  | 0.01 | C_unshiu_02853 | 3484   | 2294   | 1191  | 7.15  | 100   |
| chr6 | 895273  | 904663  | 9391  | 0.05 | C_unshiu_02990 | 9376   | 1      | 9376  | 70.99 | 98.26 |
| chr6 | 923377  | 932414  | 9038  | 0.05 | C_unshiu_00943 | 55736  | 46754  | 8983  | 8.01  | 99.17 |
| chr6 | 964149  | 966502  | 2354  | 0.01 | C_unshiu_00938 | 1      | 2354   | 2354  | 2.08  | 99.96 |
| chr6 | 966611  | 969177  | 2567  | 0.01 | C_unshiu_00938 | 2445   | 5012   | 2568  | 2.27  | 99.96 |
| chr6 | 970072  | 984027  | 13956 | 0.08 | C_unshiu_00938 | 5024   | 18915  | 13892 | 12.3  | 98.79 |
| chr6 | 992166  | 1006332 | 14167 | 0.08 | C_unshiu_02960 | 1      | 14167  | 14167 | 100   | 99.88 |
| chr6 | 1021746 | 1024241 | 2496  | 0.01 | C_unshiu_00721 | 63566  | 66037  | 2472  | 1.75  | 98.72 |
| chr6 | 1024088 | 1026978 | 2891  | 0.02 | C_unshiu_00721 | 66066  | 68956  | 2891  | 2.05  | 99.69 |
| chr6 | 1050776 | 1057248 | 6473  | 0.04 | C_unshiu_00938 | 60799  | 67271  | 6473  | 5.73  | 100   |
| chr6 | 1057127 | 1059024 | 1898  | 0.01 | C_unshiu_00938 | 67206  | 69103  | 1898  | 1.68  | 99.84 |
| chr6 | 1065694 | 1082899 | 17206 | 0.1  | C_unshiu_00721 | 105672 | 122960 | 17289 | 12.24 | 98.09 |
| chr6 | 1082900 | 1086045 | 3146  | 0.02 | C_unshiu_00711 | 106038 | 109183 | 3146  | 2.21  | 100   |
| chr6 | 1086041 | 1087652 | 1612  | 0.01 | C_unshiu_00721 | 124780 | 126373 | 1594  | 1.13  | 98.2  |
| chr6 | 1096037 | 1106643 | 10607 | 0.06 | C_unshiu_00788 | 19907  | 9340   | 10568 | 8.12  | 98.21 |
| chr6 | 1112289 | 1118866 | 6578  | 0.04 | C_unshiu_00181 | 71879  | 65324  | 6556  | 1.84  | 98.86 |
| chr6 | 1126025 | 1130476 | 4452  | 0.03 | C_unshiu_00966 | 23698  | 28147  | 4450  | 4.04  | 99.42 |
| chr6 | 1132694 | 1144185 | 11492 | 0.07 | C_unshiu_00181 | 52044  | 40550  | 11495 | 3.22  | 99.56 |
| chr6 | 1163535 | 1170788 | 7254  | 0.04 | C_unshiu_00181 | 24280  | 17031  | 7250  | 2.03  | 98.47 |
| chr6 | 1173838 | 1182568 | 8731  | 0.05 | C_unshiu_00181 | 17035  | 8292   | 8744  | 2.45  | 98.06 |
| chr6 | 1182553 | 1184069 | 1517  | 0.01 | C_unshiu_00181 | 7964   | 6443   | 1522  | 0.43  | 98.75 |

|      |         |         |       |      |                |        |        |       |       |       |
|------|---------|---------|-------|------|----------------|--------|--------|-------|-------|-------|
| chr6 | 1184648 | 1186412 | 1765  | 0.01 | C_unshiu_00297 | 253902 | 252138 | 1765  | 0.66  | 99.72 |
| chr6 | 1186779 | 1188783 | 2005  | 0.01 | C_unshiu_00181 | 2005   | 1      | 2005  | 0.56  | 100   |
| chr6 | 1212006 | 1213926 | 1921  | 0.01 | C_unshiu_00297 | 221337 | 219417 | 1921  | 0.72  | 98.33 |
| chr6 | 1219421 | 1246070 | 26650 | 0.15 | C_unshiu_00297 | 212261 | 185502 | 26760 | 10.02 | 98.76 |
| chr6 | 1247638 | 1252625 | 4988  | 0.03 | C_unshiu_01639 | 1      | 5008   | 5008  | 9.02  | 98.42 |
| chr6 | 1252995 | 1262160 | 9166  | 0.05 | C_unshiu_01639 | 5146   | 14321  | 9176  | 16.53 | 98.56 |
| chr6 | 1262156 | 1296304 | 34149 | 0.19 | C_unshiu_01639 | 15649  | 49870  | 34222 | 61.63 | 98.42 |
| chr6 | 1281370 | 1309659 | 28290 | 0.16 | C_unshiu_00297 | 162264 | 133854 | 28411 | 10.64 | 98.6  |
| chr6 | 1322299 | 1339064 | 16766 | 0.09 | C_unshiu_00297 | 123385 | 106604 | 16782 | 6.28  | 99.49 |
| chr6 | 1342106 | 1346649 | 4544  | 0.03 | C_unshiu_00297 | 102564 | 98008  | 4557  | 1.71  | 98.25 |
| chr6 | 1345026 | 1347915 | 2890  | 0.02 | C_unshiu_01398 | 67546  | 70434  | 2889  | 4.1   | 99.34 |
| chr6 | 1346681 | 1350019 | 3339  | 0.02 | C_unshiu_00297 | 97054  | 93701  | 3354  | 1.26  | 99.02 |
| chr6 | 1362435 | 1369545 | 7111  | 0.04 | C_unshiu_00297 | 82475  | 75334  | 7142  | 2.67  | 98.27 |
| chr6 | 1369257 | 1378893 | 9637  | 0.05 | C_unshiu_00297 | 75333  | 65694  | 9640  | 3.61  | 98.22 |
| chr6 | 1378260 | 1396587 | 18328 | 0.1  | C_unshiu_00297 | 64448  | 46113  | 18336 | 6.86  | 99.57 |
| chr6 | 1396688 | 1413575 | 16888 | 0.1  | C_unshiu_00135 | 100233 | 83293  | 16941 | 4.17  | 99.05 |
| chr6 | 1413563 | 1415806 | 2244  | 0.01 | C_unshiu_00135 | 83095  | 80851  | 2245  | 0.55  | 99.64 |
| chr6 | 1415776 | 1435907 | 20132 | 0.11 | C_unshiu_00135 | 80823  | 60595  | 20229 | 4.98  | 98.61 |
| chr6 | 1438209 | 1440114 | 1906  | 0.01 | C_unshiu_00135 | 58980  | 57063  | 1918  | 0.47  | 98.54 |
| chr6 | 1440378 | 1471393 | 31016 | 0.18 | C_unshiu_00135 | 56586  | 25423  | 31164 | 7.67  | 99.16 |
| chr6 | 1472607 | 1476201 | 3595  | 0.02 | C_unshiu_00135 | 23280  | 19684  | 3597  | 0.89  | 99.61 |
| chr6 | 1476383 | 1477697 | 1315  | 0.01 | C_unshiu_00135 | 19335  | 18018  | 1318  | 0.32  | 99.47 |
| chr6 | 1477817 | 1485269 | 7453  | 0.04 | C_unshiu_00135 | 16654  | 9209   | 7446  | 1.83  | 98.37 |
| chr6 | 1485879 | 1491927 | 6049  | 0.03 | C_unshiu_00135 | 9252   | 3173   | 6080  | 1.5   | 98.93 |
| chr6 | 1491367 | 1494125 | 2759  | 0.02 | C_unshiu_00135 | 8      | 2781   | 2774  | 0.68  | 98.24 |
| chr6 | 1498129 | 1522642 | 24514 | 0.14 | C_unshiu_01279 | 1765   | 26281  | 24517 | 31.11 | 99.75 |
| chr6 | 1525629 | 1572826 | 47198 | 0.27 | C_unshiu_01279 | 31569  | 78806  | 47238 | 59.94 | 99.36 |
| chr6 | 1570191 | 1580399 | 10209 | 0.06 | C_unshiu_00009 | 128    | 10346  | 10219 | 0.97  | 99.67 |
| chr6 | 1581149 | 1592218 | 11070 | 0.06 | C_unshiu_00009 | 12199  | 23313  | 11115 | 1.05  | 99.37 |
| chr6 | 1592534 | 1630140 | 37607 | 0.21 | C_unshiu_00009 | 23894  | 61431  | 37538 | 3.55  | 99.01 |
| chr6 | 1630482 | 1646355 | 15874 | 0.09 | C_unshiu_00009 | 61472  | 77341  | 15870 | 1.5   | 99.84 |
| chr6 | 1647151 | 1652628 | 5478  | 0.03 | C_unshiu_00009 | 77503  | 82976  | 5474  | 0.52  | 99.07 |
| chr6 | 1652631 | 1682613 | 29983 | 0.17 | C_unshiu_00009 | 82703  | 112730 | 30028 | 2.84  | 99.62 |
| chr6 | 1691753 | 1693027 | 1275  | 0.01 | C_unshiu_00009 | 119234 | 120505 | 1272  | 0.12  | 99.76 |
| chr6 | 1697266 | 1705122 | 7857  | 0.04 | C_unshiu_00009 | 124507 | 132388 | 7882  | 0.74  | 99.47 |
| chr6 | 1708944 | 1713270 | 4327  | 0.02 | C_unshiu_00009 | 135514 | 139849 | 4336  | 0.41  | 98.78 |
| chr6 | 1713295 | 1717708 | 4414  | 0.02 | C_unshiu_00009 | 140223 | 144638 | 4416  | 0.42  | 99.16 |
| chr6 | 1717938 | 1719506 | 1569  | 0.01 | C_unshiu_00009 | 145935 | 147503 | 1569  | 0.15  | 100   |
| chr6 | 1721594 | 1777093 | 55500 | 0.31 | C_unshiu_00009 | 164756 | 220231 | 55476 | 5.24  | 99.52 |
| chr6 | 1777130 | 1850778 | 73649 | 0.42 | C_unshiu_00009 | 220229 | 293972 | 73744 | 6.97  | 99.66 |
| chr6 | 1850770 | 1906630 | 55861 | 0.32 | C_unshiu_00009 | 295082 | 350911 | 55830 | 5.28  | 99.69 |
| chr6 | 1906640 | 1923403 | 16764 | 0.09 | C_unshiu_00009 | 351024 | 367778 | 16755 | 1.58  | 99.54 |
| chr6 | 1923386 | 1969043 | 45658 | 0.26 | C_unshiu_00009 | 367813 | 413500 | 45688 | 4.32  | 99.63 |
| chr6 | 1969085 | 1970346 | 1262  | 0.01 | C_unshiu_00009 | 413459 | 414720 | 1262  | 0.12  | 99.84 |
| chr6 | 1970445 | 2061464 | 91020 | 0.52 | C_unshiu_00009 | 415480 | 506682 | 91203 | 8.62  | 99.24 |
| chr6 | 2067946 | 2072638 | 4693  | 0.03 | C_unshiu_00009 | 506714 | 511416 | 4703  | 0.44  | 99.43 |
| chr6 | 2075393 | 2085199 | 9807  | 0.06 | C_unshiu_00009 | 513390 | 523240 | 9851  | 0.93  | 99.23 |
| chr6 | 2090017 | 2092172 | 2156  | 0.01 | C_unshiu_00009 | 527671 | 529817 | 2147  | 0.2   | 98.1  |
| chr6 | 2105714 | 2119922 | 14209 | 0.08 | C_unshiu_00009 | 539502 | 553720 | 14219 | 1.34  | 99.64 |
| chr6 | 2128730 | 2130377 | 1648  | 0.01 | C_unshiu_02167 | 15386  | 13739  | 1648  | 4.78  | 99.76 |
| chr6 | 2132157 | 2140362 | 8206  | 0.05 | C_unshiu_00135 | 363358 | 371571 | 8214  | 2.02  | 99.2  |
| chr6 | 2141468 | 2143552 | 2085  | 0.01 | C_unshiu_00135 | 373340 | 375432 | 2093  | 0.52  | 98.81 |
| chr6 | 2157385 | 2160508 | 3124  | 0.02 | C_unshiu_00135 | 386523 | 389645 | 3123  | 0.77  | 99.68 |
| chr6 | 2161698 | 2162708 | 1011  | 0.01 | C_unshiu_01128 | 89037  | 88023  | 1015  | 1.1   | 99.51 |
| chr6 | 2168284 | 2182686 | 14403 | 0.08 | C_unshiu_01128 | 82475  | 68081  | 14395 | 15.53 | 99.19 |
| chr6 | 2182677 | 2202933 | 20257 | 0.11 | C_unshiu_01128 | 67938  | 47557  | 20382 | 21.99 | 98.79 |
| chr6 | 2202924 | 2243901 | 40978 | 0.23 | C_unshiu_01128 | 46942  | 5925   | 41018 | 44.26 | 99.26 |
| chr6 | 2243898 | 2248138 | 4241  | 0.02 | C_unshiu_01128 | 5287   | 1050   | 4238  | 4.57  | 99.43 |
| chr6 | 2248591 | 2262598 | 14008 | 0.08 | C_unshiu_00420 | 165514 | 151532 | 13983 | 6.39  | 98.92 |
| chr6 | 2262598 | 2289216 | 26619 | 0.15 | C_unshiu_00420 | 151438 | 124765 | 26674 | 12.18 | 99.18 |
| chr6 | 2289211 | 2292971 | 3761  | 0.02 | C_unshiu_00420 | 124721 | 120982 | 3740  | 1.71  | 99.26 |
| chr6 | 2293067 | 2311150 | 18084 | 0.1  | C_unshiu_00420 | 120606 | 102529 | 18078 | 8.26  | 98.86 |
| chr6 | 2311148 | 2314038 | 2891  | 0.02 | C_unshiu_00420 | 98984  | 96103  | 2882  | 1.32  | 99.58 |
| chr6 | 2325094 | 2346170 | 21077 | 0.12 | C_unshiu_00133 | 365318 | 344179 | 21140 | 5.14  | 98.83 |
| chr6 | 2346667 | 2372000 | 25334 | 0.14 | C_unshiu_00133 | 343957 | 318449 | 25509 | 6.21  | 98.13 |
| chr6 | 2372015 | 2373886 | 1872  | 0.01 | C_unshiu_00133 | 318324 | 316445 | 1880  | 0.46  | 98.36 |
| chr6 | 2374627 | 2387355 | 12729 | 0.07 | C_unshiu_00133 | 316283 | 303576 | 12708 | 3.09  | 98.6  |
| chr6 | 2387335 | 2395073 | 7739  | 0.04 | C_unshiu_00133 | 303550 | 295799 | 7752  | 1.89  | 99.6  |
| chr6 | 2395290 | 2457447 | 62158 | 0.35 | C_unshiu_00133 | 295810 | 233656 | 62155 | 15.12 | 99.15 |
| chr6 | 2457439 | 2485211 | 27773 | 0.16 | C_unshiu_00133 | 228480 | 200679 | 27802 | 6.77  | 99.17 |
| chr6 | 2485352 | 2491207 | 5856  | 0.03 | C_unshiu_00133 | 200679 | 194840 | 5840  | 1.42  | 99.25 |
| chr6 | 2494698 | 2496848 | 2151  | 0.01 | C_unshiu_00593 | 93726  | 91576  | 2151  | 1.27  | 100   |
| chr6 | 2496903 | 2502627 | 5725  | 0.03 | C_unshiu_00133 | 189534 | 183801 | 5734  | 1.4   | 99.48 |
| chr6 | 2507058 | 2508843 | 1786  | 0.01 | C_unshiu_00133 | 179776 | 177992 | 1785  | 0.43  | 99.78 |
| chr6 | 2509684 | 2516679 | 6996  | 0.04 | C_unshiu_02705 | 12204  | 19200  | 6997  | 35.38 | 99.69 |
| chr6 | 2520282 | 2537732 | 17451 | 0.1  | C_unshiu_00133 | 168643 | 151185 | 17459 | 4.25  | 98.8  |
| chr6 | 2537804 | 2566780 | 28977 | 0.16 | C_unshiu_00133 | 151071 | 122135 | 28937 | 7.04  | 98.96 |
| chr6 | 2568350 | 2572424 | 4075  | 0.02 | C_unshiu_00133 | 121064 | 116983 | 4082  | 0.99  | 99.63 |
| chr6 | 2572424 | 2610097 | 37674 | 0.21 | C_unshiu_00133 | 116803 | 79011  | 37793 | 9.2   | 99.49 |

|      |         |         |       |      |                |        |        |       |       |       |
|------|---------|---------|-------|------|----------------|--------|--------|-------|-------|-------|
| chr6 | 2611511 | 2618525 | 7015  | 0.04 | C_unshiu_00133 | 77366  | 70354  | 7013  | 1.71  | 99.57 |
| chr6 | 2618532 | 2687518 | 68987 | 0.39 | C_unshiu_00133 | 69153  | 1      | 69153 | 16.83 | 99.3  |
| chr6 | 2679979 | 2713781 | 33803 | 0.19 | C_unshiu_00253 | 3641   | 37425  | 33785 | 11.46 | 99.26 |
| chr6 | 2713772 | 2715166 | 1395  | 0.01 | C_unshiu_00253 | 38129  | 39530  | 1402  | 0.48  | 98.57 |
| chr6 | 2715501 | 2760585 | 45085 | 0.26 | C_unshiu_00253 | 39515  | 84544  | 45030 | 15.28 | 99.05 |
| chr6 | 2761684 | 2803623 | 41940 | 0.24 | C_unshiu_00253 | 84412  | 126383 | 41972 | 14.24 | 98.98 |
| chr6 | 2803615 | 2816218 | 12604 | 0.07 | C_unshiu_00253 | 126507 | 139114 | 12608 | 4.28  | 99.35 |
| chr6 | 2816202 | 2823141 | 6940  | 0.04 | C_unshiu_00253 | 139134 | 146072 | 6939  | 2.35  | 99.19 |
| chr6 | 2823118 | 2850313 | 27196 | 0.15 | C_unshiu_00253 | 146265 | 173493 | 27229 | 9.24  | 99.45 |
| chr6 | 2850313 | 2862992 | 12680 | 0.07 | C_unshiu_00253 | 174205 | 186835 | 12631 | 4.29  | 98.82 |
| chr6 | 2863010 | 2864942 | 1933  | 0.01 | C_unshiu_00253 | 187324 | 189264 | 1941  | 0.66  | 99.13 |
| chr6 | 2864965 | 2933542 | 68578 | 0.39 | C_unshiu_00253 | 189738 | 258432 | 68695 | 23.31 | 99.2  |
| chr6 | 2933532 | 2938365 | 4834  | 0.03 | C_unshiu_00253 | 259128 | 263967 | 4840  | 1.64  | 99.32 |
| chr6 | 2938356 | 2951230 | 12875 | 0.07 | C_unshiu_00253 | 264224 | 277102 | 12879 | 4.37  | 99.35 |
| chr6 | 2953387 | 2956579 | 3193  | 0.02 | C_unshiu_00253 | 278338 | 281531 | 3194  | 1.08  | 98.84 |
| chr6 | 2956804 | 2969559 | 12756 | 0.07 | C_unshiu_00253 | 282041 | 294760 | 12720 | 4.32  | 98.76 |
| chr6 | 2962276 | 2979912 | 17637 | 0.1  | C_unshiu_00098 | 450786 | 433112 | 17675 | 3.85  | 99.06 |
| chr6 | 2982972 | 2992718 | 9747  | 0.06 | C_unshiu_00098 | 429352 | 419556 | 9797  | 2.14  | 98.64 |
| chr6 | 2993207 | 2996915 | 3709  | 0.02 | C_unshiu_00098 | 418831 | 415087 | 3745  | 0.82  | 98.75 |
| chr6 | 2996913 | 3000405 | 3493  | 0.02 | C_unshiu_00098 | 402670 | 399179 | 3492  | 0.76  | 99.51 |
| chr6 | 3024214 | 3033594 | 9381  | 0.05 | C_unshiu_00098 | 377315 | 367930 | 9386  | 2.05  | 99.44 |
| chr6 | 3033602 | 3039196 | 5595  | 0.03 | C_unshiu_00098 | 367767 | 362160 | 5608  | 1.22  | 99.22 |
| chr6 | 3040822 | 3077745 | 36924 | 0.21 | C_unshiu_00098 | 361131 | 324199 | 36933 | 8.05  | 99.16 |
| chr6 | 3077737 | 3096855 | 19119 | 0.11 | C_unshiu_00098 | 324057 | 304895 | 19163 | 4.18  | 99.28 |
| chr6 | 3097069 | 3101591 | 4523  | 0.03 | C_unshiu_00098 | 304650 | 300126 | 4525  | 0.99  | 99.71 |
| chr6 | 3102592 | 3106531 | 3940  | 0.02 | C_unshiu_00098 | 299959 | 296016 | 3944  | 0.86  | 99.82 |
| chr6 | 3111616 | 3125961 | 14346 | 0.08 | C_unshiu_00098 | 289353 | 275001 | 14353 | 3.13  | 99.01 |
| chr6 | 3126074 | 3128273 | 2200  | 0.01 | C_unshiu_00098 | 275019 | 272809 | 2211  | 0.48  | 99.41 |
| chr6 | 3128645 | 3146420 | 17776 | 0.1  | C_unshiu_00098 | 272817 | 255058 | 17760 | 3.87  | 99.07 |
| chr6 | 3146442 | 3156036 | 9595  | 0.05 | C_unshiu_00098 | 254412 | 244749 | 9664  | 2.11  | 98.93 |
| chr6 | 3156031 | 3212140 | 56110 | 0.32 | C_unshiu_00098 | 244682 | 188518 | 56165 | 12.24 | 99.62 |
| chr6 | 3212258 | 3216090 | 3833  | 0.02 | C_unshiu_00098 | 188393 | 184549 | 3845  | 0.84  | 99.48 |
| chr6 | 3216095 | 3218939 | 2845  | 0.02 | C_unshiu_00098 | 184442 | 181585 | 2858  | 0.62  | 99.09 |
| chr6 | 3221403 | 3226399 | 4997  | 0.03 | C_unshiu_00751 | 131061 | 136057 | 4997  | 3.67  | 100   |
| chr6 | 3234530 | 3239154 | 4625  | 0.03 | C_unshiu_01689 | 52948  | 48324  | 4625  | 8.73  | 100   |
| chr6 | 3239842 | 3243889 | 4048  | 0.02 | C_unshiu_00988 | 48341  | 52388  | 4048  | 3.76  | 100   |
| chr6 | 3243940 | 3246756 | 2817  | 0.02 | C_unshiu_01689 | 44561  | 41717  | 2845  | 5.37  | 99.02 |
| chr6 | 3250780 | 3253935 | 3156  | 0.02 | C_unshiu_01689 | 38641  | 35486  | 3156  | 5.96  | 100   |
| chr6 | 3256114 | 3258681 | 2568  | 0.01 | C_unshiu_01689 | 34455  | 31888  | 2568  | 4.85  | 100   |
| chr6 | 3261934 | 3277507 | 15574 | 0.09 | C_unshiu_01689 | 29794  | 14180  | 15615 | 29.47 | 98.43 |
| chr6 | 3277515 | 3281928 | 4414  | 0.02 | C_unshiu_01689 | 14071  | 9640   | 4432  | 8.36  | 98.76 |
| chr6 | 3281919 | 3283850 | 1932  | 0.01 | C_unshiu_01689 | 9401   | 7447   | 1955  | 3.69  | 98.72 |
| chr6 | 3286169 | 3291856 | 5688  | 0.03 | C_unshiu_01689 | 5655   | 1      | 5655  | 10.67 | 98.09 |
| chr6 | 3300240 | 3309442 | 9203  | 0.05 | C_unshiu_00574 | 65074  | 74317  | 9244  | 5.36  | 99.08 |
| chr6 | 3309442 | 3334168 | 24727 | 0.14 | C_unshiu_00574 | 74584  | 99353  | 24770 | 14.37 | 99    |
| chr6 | 3336422 | 3338408 | 1987  | 0.01 | C_unshiu_00119 | 416588 | 414602 | 1987  | 0.47  | 99.2  |
| chr6 | 3348197 | 3358687 | 10491 | 0.06 | C_unshiu_00119 | 404023 | 393530 | 10494 | 2.46  | 99.03 |
| chr6 | 3364286 | 3370586 | 6301  | 0.04 | C_unshiu_00119 | 389502 | 383188 | 6315  | 1.48  | 99.52 |
| chr6 | 3375830 | 3389050 | 13221 | 0.07 | C_unshiu_00098 | 181869 | 168647 | 13223 | 2.88  | 99.05 |
| chr6 | 3389062 | 3391432 | 2371  | 0.01 | C_unshiu_00098 | 168385 | 166015 | 2371  | 0.52  | 99.66 |
| chr6 | 3391445 | 3395604 | 4160  | 0.02 | C_unshiu_00098 | 165132 | 160960 | 4173  | 0.91  | 99.07 |
| chr6 | 3395591 | 3405152 | 9562  | 0.05 | C_unshiu_00098 | 160640 | 151006 | 9635  | 2.1   | 98.73 |
| chr6 | 3405136 | 3438503 | 33368 | 0.19 | C_unshiu_00098 | 150914 | 117527 | 33388 | 7.28  | 99.23 |
| chr6 | 3442974 | 3452380 | 9407  | 0.05 | C_unshiu_00098 | 111497 | 102087 | 9411  | 2.05  | 99.72 |
| chr6 | 3452373 | 3480585 | 28213 | 0.16 | C_unshiu_00098 | 101119 | 72880  | 28240 | 6.16  | 99.63 |
| chr6 | 3482960 | 3507023 | 24064 | 0.14 | C_unshiu_00098 | 71275  | 47231  | 24045 | 5.24  | 99.78 |
| chr6 | 3508491 | 3515172 | 6682  | 0.04 | C_unshiu_00098 | 41824  | 35117  | 6708  | 1.46  | 99.26 |
| chr6 | 3523192 | 3526544 | 3353  | 0.02 | C_unshiu_01505 | 59640  | 62974  | 3335  | 5.3   | 98.9  |
| chr6 | 3546456 | 3548002 | 1547  | 0.01 | C_unshiu_01505 | 39134  | 37589  | 1546  | 2.45  | 99.81 |
| chr6 | 3546839 | 3548018 | 1180  | 0.01 | C_unshiu_00537 | 173903 | 172724 | 1180  | 0.65  | 99.75 |
| chr6 | 3549450 | 3551500 | 2051  | 0.01 | C_unshiu_01505 | 35624  | 33582  | 2043  | 3.24  | 98.69 |
| chr6 | 3551505 | 3555828 | 4324  | 0.02 | C_unshiu_01505 | 33855  | 29526  | 4330  | 6.88  | 99.33 |
| chr6 | 3556667 | 3557843 | 1177  | 0.01 | C_unshiu_01505 | 28485  | 27308  | 1178  | 1.87  | 99.83 |
| chr6 | 3560205 | 3564410 | 4206  | 0.02 | C_unshiu_01505 | 24131  | 19911  | 4221  | 6.7   | 98.96 |
| chr6 | 3565478 | 3570543 | 5066  | 0.03 | C_unshiu_01505 | 19624  | 14540  | 5085  | 8.07  | 99.14 |
| chr6 | 3571835 | 3574594 | 2760  | 0.02 | C_unshiu_01505 | 14532  | 11773  | 2760  | 4.38  | 98.26 |
| chr6 | 3596818 | 3598100 | 1283  | 0.01 | C_unshiu_00537 | 151094 | 149812 | 1283  | 0.71  | 99.14 |
| chr6 | 3600197 | 3614890 | 14694 | 0.08 | C_unshiu_00537 | 148111 | 133414 | 14698 | 8.08  | 99.56 |
| chr6 | 3628289 | 3639782 | 11494 | 0.07 | C_unshiu_00537 | 116376 | 104756 | 11621 | 6.39  | 98.18 |
| chr6 | 3639808 | 3702819 | 63012 | 0.36 | C_unshiu_00537 | 104450 | 41349  | 63102 | 34.69 | 99.04 |
| chr6 | 3703152 | 3726909 | 23758 | 0.13 | C_unshiu_00537 | 39862  | 16079  | 23784 | 13.08 | 99.53 |
| chr6 | 3728134 | 3742893 | 14760 | 0.08 | C_unshiu_00537 | 14775  | 1      | 14775 | 8.12  | 99.65 |
| chr6 | 3733901 | 3794096 | 60196 | 0.34 | C_unshiu_00038 | 561311 | 501143 | 60169 | 8.97  | 99.12 |
| chr6 | 3794820 | 3812739 | 17920 | 0.1  | C_unshiu_00038 | 501152 | 483174 | 17979 | 2.68  | 98.42 |
| chr6 | 3812754 | 3814302 | 1549  | 0.01 | C_unshiu_00038 | 482342 | 480792 | 1551  | 0.23  | 99.61 |
| chr6 | 3814629 | 3816177 | 1549  | 0.01 | C_unshiu_00038 | 480265 | 478705 | 1561  | 0.23  | 98.91 |
| chr6 | 3823710 | 3840375 | 16666 | 0.09 | C_unshiu_00038 | 469988 | 453256 | 16733 | 2.49  | 98.85 |
| chr6 | 3840413 | 3873004 | 32592 | 0.18 | C_unshiu_00038 | 453059 | 420462 | 32598 | 4.86  | 99.31 |
| chr6 | 3873160 | 3876280 | 3121  | 0.02 | C_unshiu_00038 | 420209 | 417088 | 3122  | 0.47  | 99.78 |

|      |         |         |        |      |                |        |        |        |       |       |
|------|---------|---------|--------|------|----------------|--------|--------|--------|-------|-------|
| chr6 | 3876474 | 3877723 | 1250   | 0.01 | C_unshiu_00038 | 416822 | 415573 | 1250   | 0.19  | 99.52 |
| chr6 | 3877779 | 3893942 | 16164  | 0.09 | C_unshiu_00038 | 415246 | 399043 | 16204  | 2.42  | 99.11 |
| chr6 | 3893942 | 3918680 | 24739  | 0.14 | C_unshiu_00038 | 398674 | 373899 | 24776  | 3.69  | 99.69 |
| chr6 | 3918704 | 3920664 | 1961   | 0.01 | C_unshiu_00038 | 373770 | 371810 | 1961   | 0.29  | 99.69 |
| chr6 | 3920654 | 3958205 | 37552  | 0.21 | C_unshiu_00038 | 370391 | 332821 | 37571  | 5.6   | 99.69 |
| chr6 | 3958756 | 4003975 | 45220  | 0.26 | C_unshiu_00038 | 331237 | 285955 | 45283  | 6.75  | 99.16 |
| chr6 | 4003972 | 4029179 | 25208  | 0.14 | C_unshiu_00038 | 285829 | 260601 | 25229  | 3.76  | 99.49 |
| chr6 | 4037799 | 4042722 | 4924   | 0.03 | C_unshiu_00038 | 259015 | 254094 | 4922   | 0.73  | 99.76 |
| chr6 | 4051395 | 4071725 | 20331  | 0.12 | C_unshiu_00038 | 242694 | 222298 | 20397  | 3.04  | 99.42 |
| chr6 | 4074582 | 4077682 | 3101   | 0.02 | C_unshiu_00038 | 220498 | 217396 | 3103   | 0.46  | 99.26 |
| chr6 | 4083567 | 4091727 | 8161   | 0.05 | C_unshiu_00038 | 217538 | 209351 | 8188   | 1.22  | 99.38 |
| chr6 | 4097218 | 4152453 | 55236  | 0.31 | C_unshiu_00038 | 206509 | 151114 | 55396  | 8.26  | 99.08 |
| chr6 | 4152969 | 4155198 | 2230   | 0.01 | C_unshiu_00038 | 152875 | 150635 | 2241   | 0.33  | 98.62 |
| chr6 | 4160992 | 4173289 | 12298  | 0.07 | C_unshiu_00038 | 149213 | 136894 | 12320  | 1.84  | 98.98 |
| chr6 | 4173878 | 4208548 | 34671  | 0.2  | C_unshiu_00038 | 136616 | 101782 | 34835  | 5.19  | 99.13 |
| chr6 | 4208406 | 4217124 | 8719   | 0.05 | C_unshiu_00038 | 101763 | 93037  | 8727   | 1.3   | 99.06 |
| chr6 | 4217116 | 4227858 | 10743  | 0.06 | C_unshiu_00038 | 92885  | 82120  | 10766  | 1.6   | 99.2  |
| chr6 | 4228370 | 4242008 | 13639  | 0.08 | C_unshiu_00038 | 82084  | 68455  | 13630  | 2.03  | 99.14 |
| chr6 | 4242011 | 4247235 | 5225   | 0.03 | C_unshiu_00038 | 68496  | 63280  | 5217   | 0.78  | 99.01 |
| chr6 | 4247229 | 4271786 | 24558  | 0.14 | C_unshiu_00038 | 62861  | 38215  | 24647  | 3.67  | 99.05 |
| chr6 | 4272601 | 4275916 | 3316   | 0.02 | C_unshiu_00038 | 37491  | 34176  | 3316   | 0.49  | 99.76 |
| chr6 | 4275909 | 4281941 | 6033   | 0.03 | C_unshiu_00038 | 33490  | 27449  | 6042   | 0.9   | 99.16 |
| chr6 | 4292912 | 4300653 | 7742   | 0.04 | C_unshiu_00038 | 1132   | 8843   | 7712   | 1.15  | 98.84 |
| chr6 | 4304445 | 4312612 | 8168   | 0.05 | C_unshiu_00704 | 130686 | 138827 | 8142   | 5.69  | 99.3  |
| chr6 | 4314311 | 4354868 | 40558  | 0.23 | C_unshiu_00704 | 120938 | 80328  | 40611  | 28.36 | 99.2  |
| chr6 | 4355385 | 4359921 | 4537   | 0.03 | C_unshiu_00704 | 80085  | 75535  | 4551   | 3.18  | 99.27 |
| chr6 | 4361016 | 4376267 | 15252  | 0.09 | C_unshiu_00704 | 75543  | 60320  | 15224  | 10.63 | 99.38 |
| chr6 | 4376281 | 4380841 | 4561   | 0.03 | C_unshiu_00704 | 58620  | 54061  | 4560   | 3.18  | 99.43 |
| chr6 | 4382327 | 4394718 | 12392  | 0.07 | C_unshiu_00704 | 51346  | 38848  | 12499  | 8.73  | 98.57 |
| chr6 | 4397517 | 4405495 | 7979   | 0.05 | C_unshiu_00704 | 36035  | 28055  | 7981   | 5.57  | 99.66 |
| chr6 | 4405511 | 4410439 | 4929   | 0.03 | C_unshiu_00704 | 27905  | 22953  | 4953   | 3.46  | 98.97 |
| chr6 | 4411208 | 4421845 | 10638  | 0.06 | C_unshiu_00704 | 22961  | 12314  | 10648  | 7.44  | 99.08 |
| chr6 | 4421838 | 4432874 | 11037  | 0.06 | C_unshiu_00704 | 11063  | 1      | 11063  | 7.73  | 99.25 |
| chr6 | 4430392 | 4435209 | 4818   | 0.03 | C_unshiu_00074 | 1      | 4823   | 4823   | 0.94  | 99.65 |
| chr6 | 4435204 | 4445087 | 9884   | 0.06 | C_unshiu_00074 | 5067   | 14868  | 9802   | 1.91  | 98.12 |
| chr6 | 4445112 | 4453957 | 8846   | 0.05 | C_unshiu_00074 | 15201  | 24059  | 8859   | 1.73  | 99.24 |
| chr6 | 4457414 | 4466743 | 9330   | 0.05 | C_unshiu_00074 | 26543  | 35881  | 9339   | 1.82  | 98.47 |
| chr6 | 4466763 | 4480769 | 14007  | 0.08 | C_unshiu_00074 | 36210  | 50195  | 13986  | 2.73  | 99.3  |
| chr6 | 4480768 | 4502346 | 21579  | 0.12 | C_unshiu_00074 | 49873  | 71394  | 21522  | 4.2   | 98.96 |
| chr6 | 4506284 | 4526470 | 20187  | 0.11 | C_unshiu_00074 | 72271  | 92483  | 20213  | 3.94  | 99.63 |
| chr6 | 4526540 | 4533218 | 6679   | 0.04 | C_unshiu_00074 | 92701  | 99395  | 6695   | 1.31  | 99.45 |
| chr6 | 4533209 | 4541466 | 8258   | 0.05 | C_unshiu_00074 | 99891  | 108149 | 8259   | 1.61  | 99.37 |
| chr6 | 4542019 | 4554905 | 12887  | 0.07 | C_unshiu_02047 | 35355  | 22411  | 12945  | 33.4  | 99.14 |
| chr6 | 4555303 | 4577181 | 21879  | 0.12 | C_unshiu_02047 | 21919  | 1      | 21919  | 56.56 | 98.98 |
| chr6 | 4583232 | 4593829 | 10598  | 0.06 | C_unshiu_00079 | 496155 | 485515 | 10641  | 2.14  | 99.04 |
| chr6 | 4594035 | 4608683 | 14649  | 0.08 | C_unshiu_00079 | 485520 | 470849 | 14672  | 2.96  | 99.38 |
| chr6 | 4608490 | 4610799 | 2310   | 0.01 | C_unshiu_00079 | 470273 | 467964 | 2310   | 0.47  | 99.83 |
| chr6 | 4611519 | 4632598 | 21080  | 0.12 | C_unshiu_00079 | 467980 | 446863 | 21118  | 4.26  | 99.6  |
| chr6 | 4633017 | 4675155 | 42139  | 0.24 | C_unshiu_00079 | 446503 | 404285 | 42219  | 8.51  | 99.28 |
| chr6 | 4675065 | 4676940 | 1876   | 0.01 | C_unshiu_00079 | 404287 | 402415 | 1873   | 0.38  | 99.68 |
| chr6 | 4678844 | 4690846 | 12003  | 0.07 | C_unshiu_00079 | 396334 | 384302 | 12033  | 2.43  | 99.24 |
| chr6 | 4696784 | 4708187 | 11404  | 0.06 | C_unshiu_00079 | 381299 | 369859 | 11441  | 2.31  | 99.34 |
| chr6 | 4709272 | 4712204 | 2933   | 0.02 | C_unshiu_00079 | 369844 | 366922 | 2923   | 0.59  | 98.33 |
| chr6 | 4714001 | 4723981 | 9981   | 0.06 | C_unshiu_00079 | 365802 | 355803 | 10000  | 2.02  | 99.42 |
| chr6 | 4724084 | 4829692 | 105609 | 0.6  | C_unshiu_00079 | 355692 | 249875 | 105818 | 21.33 | 99.24 |
| chr6 | 4831242 | 4833034 | 1793   | 0.01 | C_unshiu_00079 | 247558 | 245770 | 1789   | 0.36  | 98.77 |
| chr6 | 4833859 | 4837685 | 3827   | 0.02 | C_unshiu_00079 | 244473 | 240654 | 3820   | 0.77  | 98.8  |
| chr6 | 4838366 | 4848104 | 9739   | 0.06 | C_unshiu_00079 | 240099 | 230348 | 9752   | 1.97  | 99.29 |
| chr6 | 4848703 | 4853046 | 4344   | 0.02 | C_unshiu_00079 | 188942 | 184586 | 4357   | 0.88  | 98.85 |
| chr6 | 4863709 | 4865132 | 1424   | 0.01 | C_unshiu_00079 | 220306 | 218888 | 1419   | 0.29  | 99.51 |
| chr6 | 4865579 | 4868405 | 2827   | 0.02 | C_unshiu_00079 | 218670 | 215844 | 2827   | 0.57  | 99.82 |
| chr6 | 4872776 | 4878737 | 5962   | 0.03 | C_unshiu_00079 | 170923 | 164954 | 5970   | 1.2   | 99.08 |
| chr6 | 4879620 | 4881489 | 1870   | 0.01 | C_unshiu_00079 | 164351 | 162470 | 1882   | 0.38  | 98.35 |
| chr6 | 4882164 | 4891982 | 9819   | 0.06 | C_unshiu_00079 | 162454 | 152650 | 9805   | 1.98  | 98.01 |
| chr6 | 4897597 | 4912138 | 14542  | 0.08 | C_unshiu_00079 | 148561 | 133981 | 14581  | 2.94  | 99.01 |
| chr6 | 4912130 | 4923204 | 11075  | 0.06 | C_unshiu_00079 | 133396 | 122350 | 11047  | 2.23  | 98.58 |
| chr6 | 4923034 | 4958738 | 35705  | 0.2  | C_unshiu_00079 | 121710 | 86034  | 35677  | 7.19  | 98.69 |
| chr6 | 4961863 | 4970930 | 9068   | 0.05 | C_unshiu_00079 | 79585  | 70519  | 9067   | 1.83  | 99.67 |
| chr6 | 4981618 | 4985139 | 3522   | 0.02 | C_unshiu_00538 | 180013 | 176471 | 3543   | 1.95  | 99.01 |
| chr6 | 4986036 | 4991545 | 5510   | 0.03 | C_unshiu_00538 | 175347 | 169836 | 5512   | 3.03  | 99.96 |
| chr6 | 5003719 | 5008924 | 5206   | 0.03 | C_unshiu_00591 | 57199  | 62335  | 5137   | 3.03  | 98.52 |
| chr6 | 5014452 | 5017539 | 3088   | 0.02 | C_unshiu_01045 | 66468  | 69555  | 3088   | 3.05  | 100   |
| chr6 | 5022077 | 5024236 | 2160   | 0.01 | C_unshiu_02478 | 10519  | 12678  | 2160   | 8.53  | 100   |
| chr6 | 5053657 | 5057381 | 3725   | 0.02 | C_unshiu_00366 | 91374  | 95107  | 3734   | 1.6   | 98.98 |
| chr6 | 5057953 | 5059286 | 1334   | 0.01 | C_unshiu_00366 | 83730  | 82383  | 1348   | 0.58  | 98.59 |
| chr6 | 5061693 | 5080347 | 18655  | 0.11 | C_unshiu_00366 | 80564  | 61910  | 18655  | 7.98  | 99.82 |
| chr6 | 5081500 | 5083400 | 1901   | 0.01 | C_unshiu_01271 | 65608  | 63712  | 1897   | 2.39  | 98.53 |
| chr6 | 5082351 | 5097577 | 15227  | 0.09 | C_unshiu_00015 | 420596 | 405358 | 15239  | 1.73  | 99.7  |
| chr6 | 5099926 | 5207192 | 107267 | 0.61 | C_unshiu_00015 | 402490 | 295208 | 107283 | 12.21 | 99.88 |

|      |         |         |        |      |                |        |        |        |       |       |
|------|---------|---------|--------|------|----------------|--------|--------|--------|-------|-------|
| chr6 | 5214662 | 5261454 | 46793  | 0.26 | C_unshiu_00015 | 290704 | 243904 | 46801  | 5.33  | 99.93 |
| chr6 | 5241458 | 5268170 | 26713  | 0.15 | C_unshiu_00015 | 263888 | 237414 | 26475  | 3.01  | 98.85 |
| chr6 | 5276271 | 5284534 | 8264   | 0.05 | C_unshiu_00960 | 32057  | 40316  | 8260   | 7.46  | 99.64 |
| chr6 | 5305929 | 5308169 | 2241   | 0.01 | C_unshiu_00079 | 58513  | 56275  | 2239   | 0.45  | 98.48 |
| chr6 | 5309636 | 5311199 | 1564   | 0.01 | C_unshiu_00079 | 53668  | 52102  | 1567   | 0.32  | 99.23 |
| chr6 | 5329353 | 5349502 | 20150  | 0.11 | C_unshiu_01167 | 88692  | 68499  | 20194  | 22.77 | 99.35 |
| chr6 | 5349573 | 5351604 | 2032   | 0.01 | C_unshiu_01167 | 68348  | 66308  | 2041   | 2.3   | 99.12 |
| chr6 | 5353673 | 5371651 | 17979  | 0.1  | C_unshiu_01167 | 66252  | 48243  | 18010  | 20.31 | 98.84 |
| chr6 | 5371674 | 5379057 | 7384   | 0.04 | C_unshiu_01167 | 47362  | 39959  | 7404   | 8.35  | 98.61 |
| chr6 | 5379062 | 5393885 | 14824  | 0.08 | C_unshiu_01167 | 39069  | 24164  | 14906  | 16.81 | 98.57 |
| chr6 | 5393877 | 5409246 | 15370  | 0.09 | C_unshiu_01167 | 24043  | 8657   | 15387  | 17.35 | 99.58 |
| chr6 | 5422674 | 5430356 | 7683   | 0.04 | C_unshiu_00037 | 13130  | 20799  | 7670   | 1.14  | 99.1  |
| chr6 | 5430953 | 5462190 | 31238  | 0.18 | C_unshiu_00037 | 21782  | 53052  | 31271  | 4.65  | 99.58 |
| chr6 | 5442197 | 5529360 | 87164  | 0.49 | C_unshiu_00037 | 33086  | 120237 | 87152  | 12.96 | 99.95 |
| chr6 | 5509391 | 5613339 | 103949 | 0.59 | C_unshiu_00037 | 100252 | 204227 | 103976 | 15.46 | 99.94 |
| chr6 | 5593342 | 5654891 | 61550  | 0.35 | C_unshiu_00037 | 184224 | 245780 | 61557  | 9.15  | 99.99 |
| chr6 | 5655699 | 5678417 | 22719  | 0.13 | C_unshiu_00037 | 247177 | 269895 | 22719  | 3.38  | 100   |
| chr6 | 5678416 | 5726832 | 48417  | 0.27 | C_unshiu_00037 | 269930 | 318361 | 48432  | 7.2   | 99.96 |
| chr6 | 5728933 | 5747705 | 18773  | 0.11 | C_unshiu_00037 | 319151 | 337923 | 18773  | 2.79  | 100   |
| chr6 | 5750515 | 5814885 | 64371  | 0.36 | C_unshiu_00037 | 339437 | 403764 | 64328  | 9.56  | 99.86 |
| chr6 | 5811373 | 5889733 | 78361  | 0.44 | C_unshiu_00052 | 101141 | 179531 | 78391  | 13.11 | 99.71 |
| chr6 | 5871197 | 6007106 | 135910 | 0.77 | C_unshiu_00052 | 160979 | 296887 | 135909 | 22.72 | 99.97 |
| chr6 | 6007131 | 6017388 | 10258  | 0.06 | C_unshiu_00052 | 296858 | 307122 | 10265  | 1.72  | 99.93 |
| chr6 | 6017318 | 6048064 | 30747  | 0.17 | C_unshiu_00052 | 307087 | 337832 | 30746  | 5.14  | 99.96 |
| chr6 | 6028075 | 6125687 | 97613  | 0.55 | C_unshiu_00052 | 317839 | 415435 | 97597  | 16.32 | 99.96 |
| chr6 | 6105690 | 6154405 | 48716  | 0.28 | C_unshiu_00052 | 395463 | 444136 | 48674  | 8.14  | 99.91 |
| chr6 | 6134418 | 6187579 | 53162  | 0.3  | C_unshiu_00052 | 424167 | 477468 | 53302  | 8.91  | 99.27 |
| chr6 | 6187583 | 6242756 | 55174  | 0.31 | C_unshiu_00052 | 477635 | 532859 | 55225  | 9.23  | 98.9  |
| chr6 | 6242635 | 6248096 | 5462   | 0.03 | C_unshiu_00052 | 533205 | 538664 | 5460   | 0.91  | 99.29 |
| chr6 | 6248088 | 6254718 | 6631   | 0.04 | C_unshiu_00052 | 538786 | 545446 | 6661   | 1.11  | 99.07 |
| chr6 | 6255596 | 6258079 | 2484   | 0.01 | C_unshiu_00052 | 546562 | 549046 | 2485   | 0.42  | 99.84 |
| chr6 | 6258071 | 6259532 | 1462   | 0.01 | C_unshiu_00052 | 549857 | 551320 | 1464   | 0.24  | 99.86 |
| chr6 | 6259317 | 6260787 | 1471   | 0.01 | C_unshiu_00046 | 299946 | 301427 | 1482   | 0.23  | 98.25 |
| chr6 | 6260757 | 6264632 | 3876   | 0.02 | C_unshiu_00046 | 301647 | 305542 | 3896   | 0.61  | 98.64 |
| chr6 | 6279835 | 6290963 | 11129  | 0.06 | C_unshiu_00046 | 319811 | 330967 | 11157  | 1.75  | 98.84 |
| chr6 | 6290962 | 6310847 | 19886  | 0.11 | C_unshiu_00046 | 331673 | 351704 | 20032  | 3.15  | 98.75 |
| chr6 | 6311236 | 6317862 | 6627   | 0.04 | C_unshiu_00046 | 351700 | 358333 | 6634   | 1.04  | 99.07 |
| chr6 | 6318113 | 6329661 | 11549  | 0.07 | C_unshiu_00046 | 359551 | 371112 | 11562  | 1.82  | 98.95 |
| chr6 | 6331417 | 6354590 | 23174  | 0.13 | C_unshiu_00046 | 372869 | 396077 | 23209  | 3.65  | 99.07 |
| chr6 | 6354865 | 6378084 | 23220  | 0.13 | C_unshiu_00046 | 396081 | 419285 | 23205  | 3.65  | 98.71 |
| chr6 | 6378254 | 6402123 | 23870  | 0.14 | C_unshiu_02025 | 31464  | 7642   | 23823  | 60.09 | 98.72 |
| chr6 | 6403842 | 6409365 | 5524   | 0.03 | C_unshiu_02025 | 5449   | 13     | 5437   | 13.71 | 98.1  |
| chr6 | 6410642 | 6412870 | 2229   | 0.01 | C_unshiu_00386 | 200769 | 198542 | 2228   | 0.98  | 98.21 |
| chr6 | 6419909 | 6422038 | 2130   | 0.01 | C_unshiu_00046 | 516845 | 518974 | 2130   | 0.33  | 99.72 |
| chr6 | 6422471 | 6430533 | 8063   | 0.05 | C_unshiu_00046 | 518974 | 527100 | 8127   | 1.28  | 98.76 |
| chr6 | 6432357 | 6433379 | 1023   | 0.01 | C_unshiu_01499 | 21644  | 22662  | 1019   | 1.61  | 99.61 |
| chr6 | 6434123 | 6521013 | 86891  | 0.49 | C_unshiu_00046 | 531247 | 618172 | 86926  | 13.67 | 99.28 |
| chr6 | 6521587 | 6533994 | 12408  | 0.07 | C_unshiu_00046 | 618241 | 630688 | 12448  | 1.96  | 98.94 |
| chr6 | 6533989 | 6538867 | 4879   | 0.03 | C_unshiu_00046 | 631165 | 636060 | 4896   | 0.77  | 99.53 |
| chr6 | 6538939 | 6550463 | 11525  | 0.07 | C_unshiu_00215 | 315421 | 303901 | 11521  | 3.57  | 99.23 |
| chr6 | 6550354 | 6560453 | 10100  | 0.06 | C_unshiu_00215 | 303903 | 293810 | 10094  | 3.13  | 99.57 |
| chr6 | 6560713 | 6606552 | 45840  | 0.26 | C_unshiu_00215 | 293563 | 247624 | 45940  | 14.22 | 99.43 |
| chr6 | 6607543 | 6628751 | 21209  | 0.12 | C_unshiu_00215 | 247631 | 226534 | 21098  | 6.53  | 98.29 |
| chr6 | 6636199 | 6683575 | 47377  | 0.27 | C_unshiu_00215 | 224398 | 177005 | 47394  | 14.67 | 99.16 |
| chr6 | 6683598 | 6702687 | 19090  | 0.11 | C_unshiu_00215 | 175991 | 156884 | 19108  | 5.92  | 99.28 |
| chr6 | 6704600 | 6707080 | 2481   | 0.01 | C_unshiu_00215 | 154550 | 152061 | 2490   | 0.77  | 99.16 |
| chr6 | 6707210 | 6719229 | 12020  | 0.07 | C_unshiu_00215 | 151614 | 139571 | 12044  | 3.73  | 99.25 |
| chr6 | 6718928 | 6721554 | 2627   | 0.01 | C_unshiu_00215 | 139562 | 136930 | 2633   | 0.82  | 99.51 |
| chr6 | 6722383 | 6731857 | 9475   | 0.05 | C_unshiu_00215 | 136248 | 126775 | 9474   | 2.93  | 99.81 |
| chr6 | 6731835 | 6733048 | 1214   | 0.01 | C_unshiu_00713 | 98575  | 99788  | 1214   | 0.85  | 100   |
| chr6 | 6733068 | 6745470 | 12403  | 0.07 | C_unshiu_00215 | 126947 | 114538 | 12410  | 3.84  | 99.6  |
| chr6 | 6746016 | 6769132 | 23117  | 0.13 | C_unshiu_00215 | 113035 | 89843  | 23193  | 7.18  | 99.29 |
| chr6 | 6772740 | 6785294 | 12555  | 0.07 | C_unshiu_00215 | 86179  | 73563  | 12617  | 3.91  | 99.1  |
| chr6 | 6785324 | 6798819 | 13496  | 0.08 | C_unshiu_00215 | 73348  | 59894  | 13455  | 4.17  | 99.19 |
| chr6 | 6798820 | 6801726 | 2907   | 0.02 | C_unshiu_00215 | 59543  | 56634  | 2910   | 0.9   | 99.18 |
| chr6 | 6801717 | 6807491 | 5775   | 0.03 | C_unshiu_00215 | 51107  | 45327  | 5781   | 1.79  | 99.69 |
| chr6 | 6809923 | 6814307 | 4385   | 0.02 | C_unshiu_00215 | 41399  | 37025  | 4375   | 1.35  | 99.5  |
| chr6 | 6831528 | 6869090 | 37563  | 0.21 | C_unshiu_00043 | 638934 | 601237 | 37698  | 5.9   | 99.07 |
| chr6 | 6869691 | 6871997 | 2307   | 0.01 | C_unshiu_00043 | 600097 | 597798 | 2300   | 0.36  | 99    |
| chr6 | 6873029 | 6891362 | 18334  | 0.1  | C_unshiu_00043 | 596877 | 578531 | 18347  | 2.87  | 99.63 |
| chr6 | 6891359 | 6895380 | 4022   | 0.02 | C_unshiu_00043 | 578494 | 574473 | 4022   | 0.63  | 99.63 |
| chr6 | 6899735 | 6904023 | 4289   | 0.02 | C_unshiu_00043 | 574466 | 570175 | 4292   | 0.67  | 99.04 |
| chr6 | 6904018 | 6909627 | 5610   | 0.03 | C_unshiu_00043 | 569759 | 564154 | 5606   | 0.88  | 99.64 |
| chr6 | 6910758 | 6911785 | 1028   | 0.01 | C_unshiu_00043 | 562056 | 561029 | 1028   | 0.16  | 99.71 |
| chr6 | 6912040 | 6924779 | 12740  | 0.07 | C_unshiu_00043 | 560980 | 548222 | 12759  | 2     | 99.52 |
| chr6 | 6924781 | 6931858 | 7078   | 0.04 | C_unshiu_00043 | 547824 | 540740 | 7085   | 1.11  | 99.65 |
| chr6 | 6931868 | 6982808 | 50941  | 0.29 | C_unshiu_00043 | 539660 | 488671 | 50990  | 7.98  | 99.25 |
| chr6 | 6982808 | 6989400 | 6593   | 0.04 | C_unshiu_00043 | 488535 | 481935 | 6601   | 1.03  | 99.26 |
| chr6 | 6989496 | 6999481 | 9986   | 0.06 | C_unshiu_00043 | 481949 | 471964 | 9986   | 1.56  | 99.11 |

|      |         |         |       |      |                |        |        |       |       |       |
|------|---------|---------|-------|------|----------------|--------|--------|-------|-------|-------|
| chr6 | 6999906 | 7002179 | 2274  | 0.01 | C_unshiu_00043 | 471805 | 469519 | 2287  | 0.36  | 99.26 |
| chr6 | 7002161 | 7058850 | 56690 | 0.32 | C_unshiu_00043 | 469206 | 412450 | 56757 | 8.88  | 99.62 |
| chr6 | 7063695 | 7116456 | 52762 | 0.3  | C_unshiu_00043 | 402811 | 349871 | 52941 | 8.29  | 98.98 |
| chr6 | 7116724 | 7126566 | 9843  | 0.06 | C_unshiu_00043 | 348348 | 338484 | 9865  | 1.54  | 98.88 |
| chr6 | 7126561 | 7176135 | 49575 | 0.28 | C_unshiu_00043 | 338396 | 288876 | 49521 | 7.75  | 99.33 |
| chr6 | 7176148 | 7206444 | 30297 | 0.17 | C_unshiu_00043 | 288755 | 258410 | 30346 | 4.75  | 99.47 |
| chr6 | 7206431 | 7215868 | 9438  | 0.05 | C_unshiu_00043 | 258385 | 248958 | 9428  | 1.48  | 98.41 |
| chr6 | 7216408 | 7221138 | 4731  | 0.03 | C_unshiu_00043 | 248291 | 243552 | 4740  | 0.74  | 99.56 |
| chr6 | 7227838 | 7274282 | 46445 | 0.26 | C_unshiu_00043 | 236553 | 189954 | 46600 | 7.29  | 99.22 |
| chr6 | 7278693 | 7280472 | 1780  | 0.01 | C_unshiu_00705 | 112976 | 114766 | 1791  | 1.25  | 98.44 |
| chr6 | 7282053 | 7290026 | 7974  | 0.05 | C_unshiu_00043 | 185066 | 177076 | 7991  | 1.25  | 99.13 |
| chr6 | 7290044 | 7320633 | 30590 | 0.17 | C_unshiu_00043 | 176468 | 145792 | 30677 | 4.8   | 99.16 |
| chr6 | 7321004 | 7331474 | 10471 | 0.06 | C_unshiu_00043 | 145793 | 135297 | 10497 | 1.64  | 98.93 |
| chr6 | 7349268 | 7350982 | 1715  | 0.01 | C_unshiu_00043 | 119859 | 118147 | 1713  | 0.27  | 99.65 |
| chr6 | 7355126 | 7357605 | 2480  | 0.01 | C_unshiu_00043 | 114183 | 111703 | 2481  | 0.39  | 99.36 |
| chr6 | 7368035 | 7385698 | 17664 | 0.1  | C_unshiu_00043 | 101671 | 83990  | 17682 | 2.77  | 99.19 |
| chr6 | 7389271 | 7392538 | 3268  | 0.02 | C_unshiu_00043 | 81414  | 78127  | 3288  | 0.51  | 98.88 |
| chr6 | 7394773 | 7402593 | 7821  | 0.04 | C_unshiu_00043 | 77215  | 69384  | 7832  | 1.23  | 99.49 |
| chr6 | 7404100 | 7419693 | 15594 | 0.09 | C_unshiu_00043 | 69470  | 53923  | 15548 | 2.43  | 99.36 |
| chr6 | 7416478 | 7428010 | 11533 | 0.07 | C_unshiu_00043 | 53894  | 42362  | 11533 | 1.81  | 99.6  |
| chr6 | 7429252 | 7431876 | 2625  | 0.01 | C_unshiu_00043 | 42351  | 39714  | 2638  | 0.41  | 99.09 |
| chr6 | 7433624 | 7436544 | 2921  | 0.02 | C_unshiu_00043 | 36988  | 34054  | 2935  | 0.46  | 98.94 |
| chr6 | 7436571 | 7466064 | 29494 | 0.17 | C_unshiu_00043 | 34073  | 4542   | 29532 | 4.62  | 99.51 |
| chr6 | 7464209 | 7475349 | 11141 | 0.06 | C_unshiu_00273 | 1      | 11152  | 11152 | 3.99  | 99.26 |
| chr6 | 7470014 | 7475449 | 5436  | 0.03 | C_unshiu_01263 | 79854  | 74389  | 5466  | 6.84  | 99.01 |
| chr6 | 7475793 | 7480659 | 4867  | 0.03 | C_unshiu_00273 | 11561  | 16433  | 4873  | 1.74  | 99.55 |
| chr6 | 7480661 | 7490713 | 10053 | 0.06 | C_unshiu_00273 | 16348  | 26427  | 10080 | 3.61  | 99.33 |
| chr6 | 7492531 | 7496040 | 3510  | 0.02 | C_unshiu_00273 | 27218  | 30728  | 3511  | 1.26  | 99.74 |
| chr6 | 7501003 | 7516234 | 15232 | 0.09 | C_unshiu_00273 | 31377  | 46609  | 15233 | 5.45  | 99.89 |
| chr6 | 7516254 | 7518224 | 1971  | 0.01 | C_unshiu_00273 | 46591  | 48560  | 1970  | 0.7   | 99.04 |
| chr6 | 7523508 | 7533473 | 9966  | 0.06 | C_unshiu_00273 | 50726  | 60695  | 9970  | 3.57  | 99.77 |
| chr6 | 7537096 | 7545531 | 8436  | 0.05 | C_unshiu_00273 | 62807  | 71256  | 8450  | 3.02  | 99.37 |
| chr6 | 7561307 | 7571796 | 10490 | 0.06 | C_unshiu_00273 | 87188  | 97737  | 10550 | 3.78  | 98.84 |
| chr6 | 7571750 | 7613766 | 42017 | 0.24 | C_unshiu_00273 | 98179  | 140248 | 42070 | 15.05 | 99.35 |
| chr6 | 7614992 | 7663345 | 48354 | 0.27 | C_unshiu_00273 | 142022 | 190321 | 48300 | 17.28 | 99.72 |
| chr6 | 7663347 | 7674477 | 11131 | 0.06 | C_unshiu_00273 | 190224 | 201398 | 11175 | 4     | 99.19 |
| chr6 | 7682194 | 7694499 | 12306 | 0.07 | C_unshiu_00273 | 215313 | 227606 | 12294 | 4.4   | 99.25 |
| chr6 | 7700286 | 7702891 | 2606  | 0.01 | C_unshiu_00273 | 230807 | 233414 | 2608  | 0.93  | 99.77 |
| chr6 | 7708899 | 7723286 | 14388 | 0.08 | C_unshiu_00273 | 236043 | 250448 | 14406 | 5.16  | 99.69 |
| chr6 | 7724953 | 7732268 | 7316  | 0.04 | C_unshiu_00273 | 255814 | 263159 | 7346  | 2.63  | 99.44 |
| chr6 | 7732860 | 7738351 | 5492  | 0.03 | C_unshiu_00273 | 263919 | 269395 | 5477  | 1.96  | 98.37 |
| chr6 | 7741615 | 7745699 | 4085  | 0.02 | C_unshiu_00089 | 2882   | 6993   | 4112  | 0.88  | 98.79 |
| chr6 | 7745935 | 7779212 | 33278 | 0.19 | C_unshiu_00089 | 7851   | 41080  | 33230 | 7.07  | 99.34 |
| chr6 | 7779226 | 7780946 | 1721  | 0.01 | C_unshiu_00089 | 41185  | 42904  | 1720  | 0.37  | 99.59 |
| chr6 | 7780930 | 7783475 | 2546  | 0.01 | C_unshiu_00089 | 48928  | 51466  | 2539  | 0.54  | 99.1  |
| chr6 | 7785958 | 7788964 | 3007  | 0.02 | C_unshiu_00089 | 54002  | 57010  | 3009  | 0.64  | 99.37 |
| chr6 | 7790709 | 7823848 | 33140 | 0.19 | C_unshiu_00089 | 58634  | 91771  | 33138 | 7.05  | 99.15 |
| chr6 | 7823839 | 7856086 | 32248 | 0.18 | C_unshiu_00089 | 92817  | 125053 | 32237 | 6.86  | 99.53 |
| chr6 | 7856082 | 7871057 | 14976 | 0.08 | C_unshiu_00089 | 126810 | 141763 | 14954 | 3.18  | 98.75 |
| chr6 | 7871050 | 7887001 | 15952 | 0.09 | C_unshiu_00089 | 142641 | 158610 | 15970 | 3.4   | 99.71 |
| chr6 | 7887001 | 7892496 | 5496  | 0.03 | C_unshiu_00089 | 158563 | 164090 | 5528  | 1.18  | 99.22 |
| chr6 | 7892494 | 7913882 | 21389 | 0.12 | C_unshiu_00089 | 164939 | 186353 | 21415 | 4.56  | 99.51 |
| chr6 | 7917675 | 7923551 | 5877  | 0.03 | C_unshiu_00089 | 188841 | 194711 | 5871  | 1.25  | 99.35 |
| chr6 | 7926618 | 7932303 | 5686  | 0.03 | C_unshiu_00089 | 196931 | 202642 | 5712  | 1.22  | 98.78 |
| chr6 | 7934476 | 7976898 | 42423 | 0.24 | C_unshiu_00089 | 202634 | 245250 | 42617 | 9.07  | 99.1  |
| chr6 | 7977137 | 7978621 | 1485  | 0.01 | C_unshiu_00089 | 245243 | 246725 | 1483  | 0.32  | 98.99 |
| chr6 | 7978613 | 7990137 | 11525 | 0.07 | C_unshiu_00089 | 246826 | 258354 | 11529 | 2.45  | 99.58 |
| chr6 | 7990802 | 8000970 | 10169 | 0.06 | C_unshiu_00089 | 258343 | 268518 | 10176 | 2.17  | 99.72 |
| chr6 | 8000965 | 8013707 | 12743 | 0.07 | C_unshiu_00089 | 269026 | 281771 | 12746 | 2.71  | 99.87 |
| chr6 | 8013685 | 8030609 | 16925 | 0.1  | C_unshiu_00089 | 281994 | 298966 | 16973 | 3.61  | 99.19 |
| chr6 | 8030818 | 8044045 | 13228 | 0.07 | C_unshiu_00089 | 299459 | 312632 | 13174 | 2.8   | 98.44 |
| chr6 | 8045793 | 8047043 | 1251  | 0.01 | C_unshiu_00161 | 323432 | 322182 | 1251  | 0.34  | 98.24 |
| chr6 | 8048009 | 8050084 | 2076  | 0.01 | C_unshiu_00089 | 312261 | 314335 | 2075  | 0.44  | 99.71 |
| chr6 | 8051084 | 8059692 | 8609  | 0.05 | C_unshiu_00089 | 314850 | 323461 | 8612  | 1.83  | 98.72 |
| chr6 | 8059918 | 8103439 | 43522 | 0.25 | C_unshiu_00089 | 323446 | 367055 | 43610 | 9.28  | 99.03 |
| chr6 | 8104159 | 8117846 | 13688 | 0.08 | C_unshiu_00089 | 368074 | 381805 | 13732 | 2.92  | 99.24 |
| chr6 | 8117969 | 8143154 | 25186 | 0.14 | C_unshiu_00089 | 381805 | 407019 | 25215 | 5.37  | 98.79 |
| chr6 | 8143217 | 8144463 | 1247  | 0.01 | C_unshiu_00089 | 407477 | 408723 | 1247  | 0.27  | 99.76 |
| chr6 | 8145341 | 8164355 | 19015 | 0.11 | C_unshiu_00089 | 409916 | 428927 | 19012 | 4.05  | 99.39 |
| chr6 | 8181814 | 8218494 | 36681 | 0.21 | C_unshiu_00089 | 427403 | 464168 | 36766 | 7.82  | 98.98 |
| chr6 | 8219752 | 8221885 | 2134  | 0.01 | C_unshiu_00089 | 465240 | 467383 | 2144  | 0.46  | 99.21 |
| chr6 | 8228706 | 8230804 | 2099  | 0.01 | C_unshiu_00089 | 467185 | 469295 | 2111  | 0.45  | 99.05 |
| chr6 | 8230818 | 8236437 | 5620  | 0.03 | C_unshiu_00054 | 562547 | 568175 | 5629  | 0.95  | 98.78 |
| chr6 | 8236565 | 8242646 | 6082  | 0.03 | C_unshiu_00054 | 568071 | 574181 | 6111  | 1.03  | 98.48 |
| chr6 | 8242646 | 8247959 | 5314  | 0.03 | C_unshiu_00054 | 573926 | 579248 | 5323  | 0.89  | 99.53 |
| chr6 | 8253584 | 8263464 | 9881  | 0.06 | C_unshiu_00054 | 579240 | 589162 | 9923  | 1.67  | 99.24 |
| chr6 | 8264850 | 8268179 | 3330  | 0.02 | C_unshiu_00054 | 591743 | 595068 | 3326  | 0.56  | 99.37 |
| chr6 | 8268609 | 8286164 | 17556 | 0.1  | C_unshiu_00139 | 175680 | 193249 | 17570 | 4.36  | 99.68 |
| chr6 | 8287491 | 8296777 | 9287  | 0.05 | C_unshiu_00139 | 194500 | 203803 | 9304  | 2.31  | 99.49 |

|      |         |         |       |      |                 |        |        |       |       |       |
|------|---------|---------|-------|------|-----------------|--------|--------|-------|-------|-------|
| chr6 | 8298232 | 8314544 | 16313 | 0.09 | C_unshiu_00139  | 203939 | 220277 | 16339 | 4.05  | 99.74 |
| chr6 | 8320741 | 8333558 | 12818 | 0.07 | C_unshiu_00139  | 226192 | 239019 | 12828 | 3.18  | 99.35 |
| chr6 | 8332754 | 8342064 | 9311  | 0.05 | C_unshiu_00139  | 241028 | 250340 | 9313  | 2.31  | 99.6  |
| chr6 | 8343182 | 8356578 | 13397 | 0.08 | C_unshiu_00139  | 250687 | 264086 | 13400 | 3.32  | 99.8  |
| chr6 | 8356562 | 8383794 | 27233 | 0.15 | C_unshiu_00139  | 264336 | 291609 | 27274 | 6.76  | 99.63 |
| chr6 | 8386744 | 8406585 | 19842 | 0.11 | C_unshiu_00139  | 291596 | 311541 | 19946 | 4.95  | 99.09 |
| chr6 | 8406585 | 8408632 | 2048  | 0.01 | C_unshiu_00139  | 311661 | 313711 | 2051  | 0.51  | 99.32 |
| chr6 | 8411354 | 8416664 | 5311  | 0.03 | C_unshiu_00139  | 315772 | 321094 | 5323  | 1.32  | 99.34 |
| chr6 | 8416684 | 8437820 | 21137 | 0.12 | C_unshiu_00139  | 322849 | 344023 | 21175 | 5.25  | 99.3  |
| chr6 | 8439087 | 8449551 | 10465 | 0.06 | C_unshiu_00139  | 345736 | 356180 | 10445 | 2.59  | 98.77 |
| chr6 | 8451731 | 8452969 | 1239  | 0.01 | C_unshiu_00139  | 355293 | 356531 | 1239  | 0.31  | 99.84 |
| chr6 | 8458047 | 8466741 | 8695  | 0.05 | C_unshiu_00139  | 360600 | 369300 | 8701  | 2.16  | 99.55 |
| chr6 | 8467603 | 8473564 | 5962  | 0.03 | C_unshiu_00139  | 369449 | 375434 | 5986  | 1.48  | 98.48 |
| chr6 | 8474130 | 8488233 | 14104 | 0.08 | C_unshiu_00139  | 376114 | 390222 | 14109 | 3.5   | 99.09 |
| chr6 | 8489729 | 8497978 | 8250  | 0.05 | C_unshiu_00248  | 296745 | 288496 | 8250  | 2.78  | 99.9  |
| chr6 | 8498178 | 8499772 | 1595  | 0.01 | C_unshiu_002087 | 20933  | 19339  | 1595  | 4.31  | 100   |
| chr6 | 8519923 | 8525449 | 5527  | 0.03 | C_unshiu_00248  | 264286 | 258776 | 5511  | 1.86  | 99.04 |
| chr6 | 8525427 | 8527013 | 1587  | 0.01 | C_unshiu_00248  | 258533 | 256947 | 1587  | 0.53  | 99.81 |
| chr6 | 8533330 | 8548441 | 15112 | 0.09 | C_unshiu_01309  | 31316  | 16184  | 15133 | 19.85 | 99.31 |
| chr6 | 8551821 | 8560778 | 8958  | 0.05 | C_unshiu_00248  | 239200 | 230236 | 8965  | 3.02  | 99.39 |
| chr6 | 8567633 | 8571483 | 3851  | 0.02 | C_unshiu_00248  | 223825 | 219970 | 3856  | 1.3   | 99.28 |
| chr6 | 8573540 | 8587094 | 13555 | 0.08 | C_unshiu_00248  | 216717 | 203162 | 13556 | 4.57  | 99    |
| chr6 | 8587297 | 8594452 | 7156  | 0.04 | C_unshiu_00248  | 203170 | 196008 | 7163  | 2.41  | 99.19 |
| chr6 | 8594445 | 8617412 | 22968 | 0.13 | C_unshiu_00248  | 194088 | 171110 | 22979 | 7.74  | 99.76 |
| chr6 | 8618128 | 8625743 | 7616  | 0.04 | C_unshiu_00248  | 170164 | 162543 | 7622  | 2.57  | 99.74 |
| chr6 | 8625738 | 8647664 | 21927 | 0.12 | C_unshiu_00248  | 160857 | 138931 | 21927 | 7.39  | 98.94 |
| chr6 | 8661971 | 8669321 | 7351  | 0.04 | C_unshiu_00248  | 124551 | 117201 | 7351  | 2.48  | 99.96 |
| chr6 | 8670145 | 8672718 | 2574  | 0.01 | C_unshiu_00248  | 115811 | 113238 | 2574  | 0.87  | 99.96 |
| chr6 | 8673062 | 8683495 | 10434 | 0.06 | C_unshiu_00248  | 112747 | 102305 | 10443 | 3.52  | 99.2  |
| chr6 | 8684660 | 8689425 | 4766  | 0.03 | C_unshiu_00248  | 101885 | 97116  | 4770  | 1.61  | 98.7  |
| chr6 | 8692081 | 8702385 | 10305 | 0.06 | C_unshiu_00248  | 95451  | 85156  | 10296 | 3.47  | 99.52 |
| chr6 | 8702387 | 8703852 | 1466  | 0.01 | C_unshiu_00248  | 81304  | 79823  | 1482  | 0.5   | 98.25 |
| chr6 | 8703870 | 8719995 | 16126 | 0.09 | C_unshiu_00248  | 78259  | 62114  | 16146 | 5.44  | 99.41 |
| chr6 | 8721703 | 8734270 | 12568 | 0.07 | C_unshiu_00248  | 60296  | 47712  | 12585 | 4.24  | 99.69 |
| chr6 | 8734300 | 8736008 | 1709  | 0.01 | C_unshiu_00248  | 47717  | 46007  | 1711  | 0.58  | 99.65 |
| chr6 | 8736134 | 8737404 | 1271  | 0.01 | C_unshiu_00248  | 46007  | 44735  | 1273  | 0.43  | 99.06 |
| chr6 | 8737434 | 8741517 | 4084  | 0.02 | C_unshiu_00248  | 44502  | 40407  | 4096  | 1.38  | 99.27 |
| chr6 | 8749191 | 8764854 | 15664 | 0.09 | C_unshiu_00248  | 39665  | 24065  | 15601 | 5.26  | 98.44 |
| chr6 | 8760253 | 8769122 | 8870  | 0.05 | C_unshiu_00644  | 149334 | 158180 | 8847  | 5.59  | 99.46 |
| chr6 | 8777098 | 8778422 | 1325  | 0.01 | C_unshiu_00644  | 132773 | 131449 | 1325  | 0.84  | 100   |
| chr6 | 8780504 | 8800222 | 19719 | 0.11 | C_unshiu_00644  | 128707 | 109010 | 19698 | 12.45 | 99.08 |
| chr6 | 8790349 | 8802675 | 12327 | 0.07 | C_unshiu_00248  | 12383  | 1      | 12383 | 4.17  | 98.1  |
| chr6 | 8800403 | 8826692 | 26290 | 0.15 | C_unshiu_00644  | 108305 | 81940  | 26366 | 16.67 | 99.25 |
| chr6 | 8827032 | 8889738 | 62707 | 0.35 | C_unshiu_00644  | 78617  | 15886  | 62732 | 39.66 | 99.4  |
| chr6 | 8875743 | 8897040 | 21298 | 0.12 | C_unshiu_01587  | 51610  | 30330  | 21281 | 36.49 | 98.6  |
| chr6 | 8901145 | 8905870 | 4726  | 0.03 | C_unshiu_00644  | 5962   | 1235   | 4728  | 2.99  | 99.43 |
| chr6 | 8910290 | 8913029 | 2740  | 0.02 | C_unshiu_02708  | 12943  | 10197  | 2747  | 13.93 | 99.34 |
| chr6 | 8920824 | 8945828 | 25005 | 0.14 | C_unshiu_00865  | 15487  | 40412  | 24926 | 20.62 | 98.25 |
| chr6 | 8950076 | 8966120 | 16045 | 0.09 | C_unshiu_00865  | 44030  | 60106  | 16077 | 13.3  | 99.32 |
| chr6 | 8968744 | 8975233 | 6490  | 0.04 | C_unshiu_00865  | 61556  | 68056  | 6501  | 5.38  | 99.66 |
| chr6 | 8975233 | 8984475 | 9243  | 0.05 | C_unshiu_00865  | 68171  | 77433  | 9263  | 7.66  | 99.03 |
| chr6 | 8985807 | 9010687 | 24881 | 0.14 | C_unshiu_00865  | 77499  | 102291 | 24793 | 20.51 | 98.93 |
| chr6 | 9010596 | 9013147 | 2552  | 0.01 | C_unshiu_00865  | 102291 | 104839 | 2549  | 2.11  | 99.84 |
| chr6 | 9013139 | 9014294 | 1156  | 0.01 | C_unshiu_00865  | 104897 | 106053 | 1157  | 0.96  | 99.74 |
| chr6 | 9014539 | 9017921 | 3383  | 0.02 | C_unshiu_00865  | 106588 | 109995 | 3408  | 2.82  | 98.3  |
| chr6 | 9021034 | 9022283 | 1250  | 0.01 | C_unshiu_00865  | 111989 | 113258 | 1270  | 1.05  | 98.11 |
| chr6 | 9027057 | 9029378 | 2322  | 0.01 | C_unshiu_00426  | 62621  | 64942  | 2322  | 1.07  | 100   |
| chr6 | 9029374 | 9031853 | 2480  | 0.01 | C_unshiu_00090  | 34835  | 37325  | 2491  | 0.53  | 98.52 |
| chr6 | 9033133 | 9060169 | 27037 | 0.15 | C_unshiu_00090  | 37316  | 64424  | 27109 | 5.79  | 99.17 |
| chr6 | 9060764 | 9068891 | 8128  | 0.05 | C_unshiu_00090  | 65825  | 73960  | 8136  | 1.74  | 99.59 |
| chr6 | 9070480 | 9082521 | 12042 | 0.07 | C_unshiu_00090  | 75699  | 87752  | 12054 | 2.57  | 98.86 |
| chr6 | 9082497 | 9109426 | 26930 | 0.15 | C_unshiu_00090  | 87773  | 114795 | 27023 | 5.77  | 99.12 |
| chr6 | 9109996 | 9133190 | 23195 | 0.13 | C_unshiu_00090  | 115582 | 138786 | 23205 | 4.96  | 99.3  |
| chr6 | 9135506 | 9148062 | 12557 | 0.07 | C_unshiu_00090  | 140079 | 152651 | 12573 | 2.68  | 99.32 |
| chr6 | 9151906 | 9197192 | 45287 | 0.26 | C_unshiu_00090  | 152997 | 198251 | 45255 | 9.66  | 99.17 |
| chr6 | 9197908 | 9200482 | 2575  | 0.01 | C_unshiu_00090  | 197973 | 200551 | 2579  | 0.55  | 98.49 |
| chr6 | 9200480 | 9213761 | 13282 | 0.08 | C_unshiu_00090  | 211834 | 225121 | 13288 | 2.84  | 98.55 |
| chr6 | 9216154 | 9250230 | 34077 | 0.19 | C_unshiu_00090  | 226116 | 260276 | 34161 | 7.29  | 98.85 |
| chr6 | 9266976 | 9274574 | 7599  | 0.04 | C_unshiu_00090  | 278532 | 286139 | 7608  | 1.62  | 99.01 |
| chr6 | 9274582 | 9291067 | 16486 | 0.09 | C_unshiu_00090  | 286457 | 302889 | 16433 | 3.51  | 98.52 |
| chr6 | 9298747 | 9313307 | 14561 | 0.08 | C_unshiu_00090  | 302486 | 317038 | 14553 | 3.11  | 99.36 |
| chr6 | 9313376 | 9340390 | 27015 | 0.15 | C_unshiu_00090  | 317174 | 344232 | 27059 | 5.78  | 99.25 |
| chr6 | 9340093 | 9356860 | 16768 | 0.09 | C_unshiu_00090  | 344233 | 361019 | 16787 | 3.58  | 99.22 |
| chr6 | 9356848 | 9390978 | 34131 | 0.19 | C_unshiu_00090  | 361630 | 395808 | 34179 | 7.3   | 99.07 |
| chr6 | 9390971 | 9403267 | 12297 | 0.07 | C_unshiu_00090  | 395960 | 408291 | 12332 | 2.63  | 99.26 |
| chr6 | 9405252 | 9412971 | 7720  | 0.04 | C_unshiu_00090  | 409362 | 417083 | 7722  | 1.65  | 99.47 |
| chr6 | 9413139 | 9414789 | 1651  | 0.01 | C_unshiu_00090  | 417682 | 419336 | 1655  | 0.35  | 99.4  |
| chr6 | 9415054 | 9429504 | 14451 | 0.08 | C_unshiu_00090  | 419689 | 434154 | 14466 | 3.09  | 99.54 |
| chr6 | 9431255 | 9444451 | 13197 | 0.07 | C_unshiu_00090  | 435178 | 448362 | 13185 | 2.82  | 99.01 |

|      |          |          |       |      |                |         |         |       |       |       |
|------|----------|----------|-------|------|----------------|---------|---------|-------|-------|-------|
| chr6 | 9445363  | 9451442  | 6080  | 0.03 | C_unshiu_00090 | 450128  | 456201  | 6074  | 1.3   | 99.34 |
| chr6 | 9448523  | 9451451  | 2929  | 0.02 | C_unshiu_00008 | 1016784 | 1013838 | 2947  | 0.27  | 98.34 |
| chr6 | 9453527  | 9458829  | 5303  | 0.03 | C_unshiu_00090 | 458516  | 463802  | 5287  | 1.13  | 98.46 |
| chr6 | 9459134  | 9463363  | 4230  | 0.02 | C_unshiu_00090 | 464050  | 468302  | 4253  | 0.91  | 98.82 |
| chr6 | 9460735  | 9472876  | 12142 | 0.07 | C_unshiu_00008 | 1003711 | 991581  | 12131 | 1.13  | 99.38 |
| chr6 | 9474688  | 9490198  | 15511 | 0.09 | C_unshiu_00008 | 989747  | 974211  | 15537 | 1.44  | 99.49 |
| chr6 | 9490431  | 9492686  | 2256  | 0.01 | C_unshiu_00008 | 974219  | 971964  | 2256  | 0.21  | 99.6  |
| chr6 | 9494576  | 9529047  | 34472 | 0.2  | C_unshiu_00008 | 969391  | 934848  | 34544 | 3.21  | 99.44 |
| chr6 | 9529281  | 9568661  | 39381 | 0.22 | C_unshiu_00008 | 933935  | 894572  | 39364 | 3.65  | 98.86 |
| chr6 | 9568679  | 9578637  | 9959  | 0.06 | C_unshiu_00008 | 894164  | 884183  | 9982  | 0.93  | 99.12 |
| chr6 | 9592681  | 9616346  | 23666 | 0.13 | C_unshiu_00008 | 864614  | 840961  | 23654 | 2.2   | 99.3  |
| chr6 | 9616339  | 9622500  | 6162  | 0.03 | C_unshiu_00008 | 840517  | 834358  | 6160  | 0.57  | 99.42 |
| chr6 | 9622391  | 9669811  | 47421 | 0.27 | C_unshiu_00008 | 834278  | 786905  | 47374 | 4.4   | 99.46 |
| chr6 | 9669947  | 9676924  | 6978  | 0.04 | C_unshiu_00008 | 786653  | 779665  | 6989  | 0.65  | 99.57 |
| chr6 | 9677031  | 9683901  | 6871  | 0.04 | C_unshiu_00008 | 779538  | 772654  | 6885  | 0.64  | 99.64 |
| chr6 | 9685443  | 9693755  | 8313  | 0.05 | C_unshiu_00008 | 771487  | 763171  | 8317  | 0.77  | 99.57 |
| chr6 | 9693911  | 9720279  | 26369 | 0.15 | C_unshiu_00008 | 763136  | 736790  | 26347 | 2.45  | 99.4  |
| chr6 | 9740043  | 9742232  | 2190  | 0.01 | C_unshiu_00008 | 715611  | 713417  | 2195  | 0.2   | 99.45 |
| chr6 | 9748736  | 9752846  | 4111  | 0.02 | C_unshiu_00008 | 707381  | 703265  | 4117  | 0.38  | 99.25 |
| chr6 | 9753280  | 9774930  | 21651 | 0.12 | C_unshiu_00008 | 702377  | 680753  | 21625 | 2.01  | 99.54 |
| chr6 | 9776016  | 9803074  | 27059 | 0.15 | C_unshiu_00008 | 679169  | 652096  | 27074 | 2.51  | 99.74 |
| chr6 | 9805172  | 9832044  | 26873 | 0.15 | C_unshiu_00008 | 649471  | 622592  | 26880 | 2.49  | 99.32 |
| chr6 | 9832042  | 9853387  | 21346 | 0.12 | C_unshiu_00008 | 622231  | 600897  | 21335 | 1.98  | 99.34 |
| chr6 | 9855139  | 9889761  | 34623 | 0.2  | C_unshiu_00008 | 598723  | 564181  | 34543 | 3.21  | 98.99 |
| chr6 | 9889765  | 9896780  | 7016  | 0.04 | C_unshiu_00008 | 563997  | 556975  | 7023  | 0.65  | 99.67 |
| chr6 | 9896772  | 9901171  | 4400  | 0.02 | C_unshiu_00008 | 555672  | 551309  | 4364  | 0.41  | 98.89 |
| chr6 | 9910263  | 9920036  | 9774  | 0.06 | C_unshiu_00008 | 539512  | 529721  | 9792  | 0.91  | 99.33 |
| chr6 | 9923420  | 9933599  | 10180 | 0.06 | C_unshiu_00008 | 529402  | 519230  | 10173 | 0.94  | 98.82 |
| chr6 | 9933564  | 9949782  | 16219 | 0.09 | C_unshiu_00008 | 519127  | 502931  | 16197 | 1.5   | 98.99 |
| chr6 | 9967407  | 9997527  | 30121 | 0.17 | C_unshiu_00008 | 484732  | 454512  | 30221 | 2.8   | 99.31 |
| chr6 | 9997391  | 10005472 | 8082  | 0.05 | C_unshiu_00008 | 454475  | 446383  | 8093  | 0.75  | 99.63 |
| chr6 | 10007023 | 10013566 | 6544  | 0.04 | C_unshiu_00008 | 443610  | 437052  | 6559  | 0.61  | 99.44 |
| chr6 | 10014177 | 10017218 | 3042  | 0.02 | C_unshiu_01643 | 20140   | 17099   | 3042  | 5.49  | 99.97 |
| chr6 | 10021138 | 10026739 | 5602  | 0.03 | C_unshiu_00008 | 427617  | 422013  | 5605  | 0.52  | 99.89 |
| chr6 | 10027483 | 10031512 | 4030  | 0.02 | C_unshiu_00008 | 422017  | 417988  | 4030  | 0.37  | 99.98 |
| chr6 | 10031443 | 10036327 | 4885  | 0.03 | C_unshiu_00008 | 417990  | 413106  | 4885  | 0.45  | 100   |
| chr6 | 10041499 | 10074746 | 33248 | 0.19 | C_unshiu_00008 | 408496  | 375160  | 33337 | 3.09  | 99.26 |
| chr6 | 10074730 | 10106380 | 31651 | 0.18 | C_unshiu_00008 | 375249  | 343542  | 31708 | 2.94  | 99.39 |
| chr6 | 10106381 | 10161066 | 54686 | 0.31 | C_unshiu_00008 | 342749  | 288003  | 54747 | 5.08  | 99.55 |
| chr6 | 10161645 | 10178747 | 17103 | 0.1  | C_unshiu_00008 | 286318  | 269176  | 17143 | 1.59  | 99.38 |
| chr6 | 10178718 | 10197417 | 18700 | 0.11 | C_unshiu_00008 | 268562  | 249827  | 18736 | 1.74  | 99.2  |
| chr6 | 10208243 | 10224686 | 16444 | 0.09 | C_unshiu_00008 | 240179  | 223706  | 16474 | 1.53  | 99.18 |
| chr6 | 10224697 | 10235494 | 10798 | 0.06 | C_unshiu_00008 | 223247  | 212376  | 10872 | 1.01  | 99.09 |
| chr6 | 10238027 | 10278840 | 40814 | 0.23 | C_unshiu_00008 | 210014  | 169197  | 40818 | 3.79  | 99.77 |
| chr6 | 10280219 | 10282579 | 2361  | 0.01 | C_unshiu_00008 | 167716  | 165356  | 2361  | 0.22  | 99.75 |
| chr6 | 10283175 | 10317581 | 34407 | 0.19 | C_unshiu_00008 | 164583  | 130218  | 34366 | 3.19  | 99.63 |
| chr6 | 10317402 | 10322375 | 4974  | 0.03 | C_unshiu_00008 | 129781  | 124807  | 4975  | 0.46  | 99.7  |
| chr6 | 10327541 | 10343689 | 16149 | 0.09 | C_unshiu_00008 | 119941  | 103793  | 16149 | 1.5   | 99.91 |
| chr6 | 10343776 | 10344880 | 1105  | 0.01 | C_unshiu_00042 | 356901  | 358005  | 1105  | 0.17  | 100   |
| chr6 | 10348217 | 10374560 | 26344 | 0.15 | C_unshiu_00008 | 100187  | 73833   | 26355 | 2.45  | 98    |
| chr6 | 10374552 | 10388033 | 13482 | 0.08 | C_unshiu_00008 | 72956   | 59452   | 13505 | 1.25  | 99.34 |
| chr6 | 10388604 | 10446158 | 57555 | 0.33 | C_unshiu_00008 | 58894   | 1345    | 57550 | 5.34  | 99.19 |
| chr6 | 10451391 | 10470519 | 19129 | 0.11 | C_unshiu_01534 | 55442   | 36317   | 19126 | 31.17 | 99.59 |
| chr6 | 10472897 | 10482122 | 9226  | 0.05 | C_unshiu_01577 | 49568   | 58816   | 9249  | 15.73 | 99.48 |
| chr6 | 10472898 | 10503995 | 31098 | 0.18 | C_unshiu_01534 | 34013   | 2829    | 31185 | 50.82 | 99.1  |
| chr6 | 10505004 | 10524652 | 19649 | 0.11 | C_unshiu_00694 | 124926  | 105286  | 19641 | 13.57 | 99.96 |
| chr6 | 10524653 | 10581189 | 56537 | 0.32 | C_unshiu_00694 | 104934  | 48486   | 56449 | 39.01 | 99.66 |
| chr6 | 10581321 | 10596655 | 15335 | 0.09 | C_unshiu_00694 | 47860   | 32525   | 15336 | 10.6  | 99.99 |
| chr6 | 10599091 | 10608055 | 8965  | 0.05 | C_unshiu_00694 | 31311   | 22407   | 8905  | 6.15  | 99.03 |
| chr6 | 10611716 | 10614557 | 2842  | 0.02 | C_unshiu_01723 | 22955   | 25789   | 2835  | 5.48  | 99.65 |
| chr6 | 10614827 | 10621200 | 6374  | 0.04 | C_unshiu_00694 | 17205   | 10814   | 6392  | 4.42  | 98.94 |
| chr6 | 10620187 | 10621200 | 1014  | 0.01 | C_unshiu_01235 | 76916   | 75884   | 1033  | 1.26  | 98.16 |
| chr6 | 10629669 | 10639384 | 9716  | 0.05 | C_unshiu_00556 | 162456  | 172189  | 9734  | 5.5   | 99.55 |
| chr6 | 10648669 | 10652467 | 3799  | 0.02 | C_unshiu_02060 | 22584   | 18783   | 3802  | 9.93  | 98.5  |
| chr6 | 10660540 | 10664036 | 3497  | 0.02 | C_unshiu_00693 | 2399    | 5895    | 3497  | 2.42  | 99.91 |
| chr6 | 10669812 | 10675911 | 6100  | 0.03 | C_unshiu_00361 | 229438  | 235501  | 6064  | 2.57  | 98.39 |
| chr6 | 10682612 | 10686504 | 3893  | 0.02 | C_unshiu_00693 | 13579   | 17476   | 3898  | 2.69  | 99.18 |
| chr6 | 10686509 | 10707463 | 20955 | 0.12 | C_unshiu_00693 | 17865   | 38791   | 20927 | 14.45 | 98.01 |
| chr6 | 10707829 | 10709633 | 1805  | 0.01 | C_unshiu_00693 | 39716   | 41518   | 1803  | 1.25  | 99.5  |
| chr6 | 10709759 | 10715604 | 5846  | 0.03 | C_unshiu_00693 | 41533   | 47304   | 5772  | 3.99  | 98.08 |
| chr6 | 10742512 | 10745891 | 3380  | 0.02 | C_unshiu_02390 | 24042   | 27454   | 3413  | 12.43 | 98.8  |
| chr6 | 10747758 | 10766582 | 18825 | 0.11 | C_unshiu_00693 | 81042   | 99858   | 18817 | 13    | 98.89 |
| chr6 | 10765172 | 10768131 | 2960  | 0.02 | C_unshiu_00940 | 31117   | 28157   | 2961  | 2.64  | 99.8  |
| chr6 | 10768850 | 10771297 | 2448  | 0.01 | C_unshiu_00940 | 27002   | 24555   | 2448  | 2.18  | 99.59 |
| chr6 | 10771317 | 10773404 | 2088  | 0.01 | C_unshiu_00693 | 99773   | 101860  | 2088  | 1.44  | 99.71 |
| chr6 | 10773364 | 10786088 | 12725 | 0.07 | C_unshiu_00693 | 102100  | 114887  | 12788 | 8.83  | 98.24 |
| chr6 | 10781837 | 10792485 | 10649 | 0.06 | C_unshiu_00940 | 13914   | 3254    | 10661 | 9.49  | 98.89 |
| chr6 | 10791118 | 10817109 | 25992 | 0.15 | C_unshiu_00693 | 116800  | 142809  | 26010 | 17.96 | 99.66 |
| chr6 | 10817210 | 10820290 | 3081  | 0.02 | C_unshiu_00371 | 210937  | 207856  | 3082  | 1.33  | 98.83 |

|      |          |          |       |      |                |        |        |       |       |       |
|------|----------|----------|-------|------|----------------|--------|--------|-------|-------|-------|
| chr6 | 10822269 | 10832737 | 10469 | 0.06 | C_unshiu_01340 | 37139  | 47607  | 10469 | 14.04 | 100   |
| chr6 | 10837112 | 10839089 | 1978  | 0.01 | C_unshiu_01340 | 21553  | 23529  | 1977  | 2.65  | 98.94 |
| chr6 | 10866641 | 10888671 | 22031 | 0.12 | C_unshiu_02116 | 1      | 22058  | 22058 | 61.29 | 99.16 |
| chr6 | 10889893 | 10892070 | 2178  | 0.01 | C_unshiu_01423 | 51158  | 48981  | 2178  | 3.16  | 100   |
| chr6 | 10892071 | 10893097 | 1027  | 0.01 | C_unshiu_02116 | 28077  | 29103  | 1027  | 2.85  | 100   |
| chr6 | 10893099 | 10894908 | 1810  | 0.01 | C_unshiu_00110 | 4265   | 6077   | 1813  | 0.41  | 99.12 |
| chr6 | 10894909 | 10896247 | 1339  | 0.01 | C_unshiu_01298 | 24787  | 26125  | 1339  | 1.73  | 99.55 |
| chr6 | 10897582 | 10899359 | 1778  | 0.01 | C_unshiu_01298 | 28434  | 30212  | 1779  | 2.29  | 99.49 |
| chr6 | 10917944 | 10924515 | 6572  | 0.04 | C_unshiu_00110 | 22016  | 28588  | 6573  | 1.49  | 98.13 |
| chr6 | 10946817 | 10949746 | 2930  | 0.02 | C_unshiu_00110 | 53747  | 56679  | 2933  | 0.67  | 98.64 |
| chr6 | 10962516 | 10967251 | 4736  | 0.03 | C_unshiu_00110 | 61093  | 65869  | 4777  | 1.09  | 98.64 |
| chr6 | 10984062 | 10988864 | 4803  | 0.03 | C_unshiu_00110 | 84103  | 88923  | 4821  | 1.1   | 98.92 |
| chr6 | 10988891 | 11008467 | 19577 | 0.11 | C_unshiu_00110 | 89320  | 109007 | 19688 | 4.47  | 98.71 |
| chr6 | 11009229 | 11011968 | 2740  | 0.02 | C_unshiu_00110 | 109799 | 112538 | 2740  | 0.62  | 99.82 |
| chr6 | 11011969 | 11015182 | 3214  | 0.02 | C_unshiu_00110 | 112801 | 115989 | 3189  | 0.72  | 98.17 |
| chr6 | 11015385 | 11020733 | 5349  | 0.03 | C_unshiu_00110 | 115981 | 121338 | 5358  | 1.22  | 98.92 |
| chr6 | 11029098 | 11033329 | 4232  | 0.02 | C_unshiu_02571 | 22728  | 18493  | 4236  | 18.64 | 99.6  |
| chr6 | 11037375 | 11040336 | 2962  | 0.02 | C_unshiu_02571 | 14929  | 11968  | 2962  | 13.03 | 99.93 |
| chr6 | 11054303 | 11059845 | 5543  | 0.03 | C_unshiu_00507 | 74798  | 80342  | 5545  | 2.93  | 99.89 |
| chr6 | 11060857 | 11062007 | 1151  | 0.01 | C_unshiu_02571 | 1151   | 1      | 1151  | 5.06  | 100   |
| chr6 | 11078543 | 11084391 | 5849  | 0.03 | C_unshiu_00507 | 91862  | 97734  | 5873  | 3.1   | 98.86 |
| chr6 | 11091604 | 11096932 | 5329  | 0.03 | C_unshiu_00507 | 104951 | 110298 | 5348  | 2.83  | 98.9  |
| chr6 | 11100758 | 11109579 | 8822  | 0.05 | C_unshiu_00507 | 113684 | 122505 | 8822  | 4.66  | 99.65 |
| chr6 | 11111452 | 11118534 | 7083  | 0.04 | C_unshiu_00507 | 124730 | 131839 | 7110  | 3.76  | 98.05 |
| chr6 | 11119260 | 11123074 | 3815  | 0.02 | C_unshiu_00507 | 132483 | 136299 | 3817  | 2.02  | 99.29 |
| chr6 | 11140624 | 11144208 | 3585  | 0.02 | C_unshiu_00507 | 153269 | 156864 | 3596  | 1.9   | 99.22 |
| chr6 | 11159267 | 11165613 | 6347  | 0.04 | C_unshiu_00507 | 175576 | 181922 | 6347  | 3.36  | 100   |
| chr6 | 11165673 | 11169687 | 4015  | 0.02 | C_unshiu_00507 | 182020 | 186033 | 4014  | 2.12  | 99.88 |
| chr6 | 11168302 | 11191946 | 23645 | 0.13 | C_unshiu_00102 | 404943 | 381314 | 23630 | 5.2   | 99.1  |
| chr6 | 11198215 | 11203897 | 5683  | 0.03 | C_unshiu_00053 | 72058  | 66376  | 5683  | 0.95  | 100   |
| chr6 | 11205487 | 11206546 | 1060  | 0.01 | C_unshiu_00557 | 117772 | 118830 | 1059  | 0.6   | 99.43 |
| chr6 | 11208391 | 11210728 | 2338  | 0.01 | C_unshiu_00557 | 121048 | 123374 | 2327  | 1.32  | 99.06 |
| chr6 | 11211340 | 11213446 | 2107  | 0.01 | C_unshiu_00557 | 155224 | 157330 | 2107  | 1.19  | 99.24 |
| chr6 | 11215750 | 11217983 | 2234  | 0.01 | C_unshiu_02201 | 7027   | 9261   | 2235  | 6.75  | 99.19 |
| chr6 | 11217782 | 11226324 | 8543  | 0.05 | C_unshiu_02201 | 10818  | 19348  | 8531  | 25.75 | 98.93 |
| chr6 | 11226596 | 11232562 | 5967  | 0.03 | C_unshiu_02201 | 19854  | 25828  | 5975  | 18.03 | 99.41 |
| chr6 | 11233615 | 11236342 | 2728  | 0.02 | C_unshiu_00739 | 121100 | 123827 | 2728  | 1.98  | 100   |
| chr6 | 11255692 | 11261331 | 5640  | 0.03 | C_unshiu_00771 | 108245 | 113884 | 5640  | 4.25  | 100   |
| chr6 | 11267910 | 11276745 | 8836  | 0.05 | C_unshiu_00146 | 381833 | 372997 | 8837  | 2.25  | 99.51 |
| chr6 | 11279262 | 11293402 | 14141 | 0.08 | C_unshiu_00146 | 372857 | 358677 | 14181 | 3.61  | 98.85 |
| chr6 | 11299531 | 11302193 | 2663  | 0.02 | C_unshiu_00146 | 348232 | 345562 | 2671  | 0.68  | 98.39 |
| chr6 | 11303339 | 11321898 | 18560 | 0.11 | C_unshiu_00146 | 344364 | 325778 | 18587 | 4.74  | 99.55 |
| chr6 | 11322740 | 11338282 | 15543 | 0.09 | C_unshiu_00146 | 325780 | 310208 | 15573 | 3.97  | 98.15 |
| chr6 | 11338968 | 11352839 | 13872 | 0.08 | C_unshiu_00146 | 309060 | 295180 | 13881 | 3.54  | 99.66 |
| chr6 | 11352638 | 11355176 | 2539  | 0.01 | C_unshiu_00146 | 295176 | 292638 | 2539  | 0.65  | 99.84 |
| chr6 | 11355268 | 11391373 | 36106 | 0.2  | C_unshiu_00146 | 292637 | 256517 | 36121 | 9.21  | 99.54 |
| chr6 | 11391474 | 11397508 | 6035  | 0.03 | C_unshiu_01101 | 37100  | 31038  | 6063  | 6.31  | 98.14 |
| chr6 | 11397495 | 11400258 | 2764  | 0.02 | C_unshiu_01101 | 30821  | 28057  | 2765  | 2.88  | 99.89 |
| chr6 | 11403798 | 11407439 | 3642  | 0.02 | C_unshiu_01101 | 21989  | 18335  | 3655  | 3.81  | 98.09 |
| chr6 | 11407540 | 11414722 | 7183  | 0.04 | C_unshiu_00464 | 84939  | 92121  | 7183  | 3.53  | 100   |
| chr6 | 11419847 | 11420986 | 1140  | 0.01 | C_unshiu_00851 | 9976   | 8839   | 1138  | 0.93  | 99.82 |
| chr6 | 11426553 | 11429438 | 2886  | 0.02 | C_unshiu_00851 | 2889   | 1      | 2889  | 2.36  | 98.93 |
| chr6 | 11435936 | 11437153 | 1218  | 0.01 | C_unshiu_00573 | 56944  | 55728  | 1217  | 0.71  | 99.92 |
| chr6 | 11437205 | 11442338 | 5134  | 0.03 | C_unshiu_00573 | 55351  | 50184  | 5168  | 2.99  | 99.03 |
| chr6 | 11439433 | 11452415 | 12983 | 0.07 | C_unshiu_02495 | 13019  | 1      | 13019 | 52.77 | 98.57 |
| chr6 | 11465227 | 11493650 | 28424 | 0.16 | C_unshiu_01371 | 70963  | 42580  | 28384 | 38.97 | 99.61 |
| chr6 | 11494473 | 11525815 | 31343 | 0.18 | C_unshiu_01371 | 40917  | 9506   | 31412 | 43.13 | 98.22 |
| chr6 | 11525817 | 11536259 | 10443 | 0.06 | C_unshiu_02111 | 7921   | 18367  | 10447 | 28.86 | 98.27 |
| chr6 | 11535595 | 11542318 | 6724  | 0.04 | C_unshiu_01297 | 77600  | 70870  | 6731  | 8.67  | 99.39 |
| chr6 | 11545473 | 11560377 | 14905 | 0.08 | C_unshiu_02111 | 21299  | 36193  | 14895 | 41.15 | 99.77 |
| chr6 | 11571217 | 11581106 | 9890  | 0.06 | C_unshiu_01297 | 64357  | 54506  | 9852  | 12.7  | 98.5  |
| chr6 | 11581410 | 11583574 | 2165  | 0.01 | C_unshiu_01297 | 53656  | 51492  | 2165  | 2.79  | 100   |
| chr6 | 11584072 | 11587383 | 3312  | 0.02 | C_unshiu_02361 | 17423  | 14111  | 3313  | 11.81 | 99.91 |
| chr6 | 11590453 | 11591774 | 1322  | 0.01 | C_unshiu_01297 | 46601  | 45291  | 1311  | 1.69  | 99.17 |
| chr6 | 11622709 | 11627010 | 4302  | 0.02 | C_unshiu_01297 | 12735  | 8434   | 4302  | 5.54  | 100   |
| chr6 | 11627797 | 11636437 | 8641  | 0.05 | C_unshiu_00668 | 84234  | 92935  | 8702  | 5.7   | 98.42 |
| chr6 | 11636437 | 11657653 | 21217 | 0.12 | C_unshiu_00668 | 93082  | 114373 | 21292 | 13.95 | 98.88 |
| chr6 | 11660573 | 11688554 | 27982 | 0.16 | C_unshiu_01610 | 34536  | 6457   | 28080 | 49.19 | 98.03 |
| chr6 | 11686235 | 11705709 | 19475 | 0.11 | C_unshiu_01118 | 57682  | 38313  | 19370 | 20.62 | 98.56 |
| chr6 | 11709290 | 11715346 | 6057  | 0.03 | C_unshiu_01025 | 1      | 6066   | 6066  | 5.87  | 98.2  |
| chr6 | 11721353 | 11722506 | 1154  | 0.01 | C_unshiu_01025 | 15115  | 16267  | 1153  | 1.12  | 98.87 |
| chr6 | 11723430 | 11725149 | 1720  | 0.01 | C_unshiu_01025 | 19183  | 20903  | 1721  | 1.67  | 99.94 |
| chr6 | 11731694 | 11739263 | 7570  | 0.04 | C_unshiu_01025 | 27690  | 35242  | 7553  | 7.31  | 98.81 |
| chr6 | 11748203 | 11766283 | 18081 | 0.1  | C_unshiu_01117 | 53292  | 35205  | 18088 | 19.24 | 99.9  |
| chr6 | 11767348 | 11771613 | 4266  | 0.02 | C_unshiu_01117 | 33828  | 29557  | 4272  | 4.54  | 98.9  |
| chr6 | 11771606 | 11784639 | 13034 | 0.07 | C_unshiu_01117 | 28679  | 15682  | 12998 | 13.83 | 99.07 |
| chr6 | 11787365 | 11789857 | 2493  | 0.01 | C_unshiu_02589 | 18610  | 21104  | 2495  | 11.11 | 99.64 |
| chr6 | 11792143 | 11806245 | 14103 | 0.08 | C_unshiu_02589 | 14073  | 1      | 14073 | 62.69 | 98.78 |
| chr6 | 11817725 | 11819168 | 1444  | 0.01 | C_unshiu_00927 | 56605  | 55162  | 1444  | 1.27  | 99.58 |

|      |          |          |       |      |                |        |        |       |       |       |
|------|----------|----------|-------|------|----------------|--------|--------|-------|-------|-------|
| chr6 | 11828654 | 11847243 | 18590 | 0.11 | C_unshiu_00927 | 38396  | 19744  | 18653 | 16.36 | 99.56 |
| chr6 | 11836810 | 11849744 | 12935 | 0.07 | C_unshiu_00927 | 30177  | 17247  | 12931 | 11.34 | 99.72 |
| chr6 | 11859262 | 11861897 | 2636  | 0.01 | C_unshiu_01035 | 93823  | 91181  | 2643  | 2.57  | 98.45 |
| chr6 | 11885426 | 11888320 | 2895  | 0.02 | C_unshiu_01035 | 66239  | 63331  | 2909  | 2.83  | 99.18 |
| chr6 | 11903573 | 11904795 | 1223  | 0.01 | C_unshiu_00313 | 62353  | 61131  | 1223  | 0.47  | 100   |
| chr6 | 11915184 | 11918954 | 3771  | 0.02 | C_unshiu_01035 | 37891  | 34122  | 3770  | 3.67  | 99.84 |
| chr6 | 11923064 | 11928287 | 5224  | 0.03 | C_unshiu_01035 | 30415  | 25175  | 5241  | 5.1   | 99.35 |
| chr6 | 11928283 | 11950746 | 22464 | 0.13 | C_unshiu_01035 | 24943  | 2500   | 22444 | 21.86 | 99.67 |
| chr6 | 11951154 | 11952972 | 1819  | 0.01 | C_unshiu_01035 | 1829   | 12     | 1818  | 1.77  | 99.95 |
| chr6 | 11954060 | 11955620 | 1561  | 0.01 | C_unshiu_00020 | 635427 | 636987 | 1561  | 0.2   | 100   |
| chr6 | 11962951 | 11964189 | 1239  | 0.01 | C_unshiu_01830 | 40195  | 38957  | 1239  | 2.62  | 99.76 |
| chr6 | 11968320 | 11972979 | 4660  | 0.03 | C_unshiu_01830 | 35819  | 31160  | 4660  | 9.84  | 100   |
| chr6 | 11973324 | 11981325 | 8002  | 0.05 | C_unshiu_01830 | 31027  | 23024  | 8004  | 16.9  | 99.33 |
| chr6 | 11979777 | 11985775 | 5999  | 0.03 | C_unshiu_00272 | 77880  | 71823  | 6058  | 2.16  | 98.6  |
| chr6 | 11985866 | 11988920 | 3055  | 0.02 | C_unshiu_00272 | 69156  | 66093  | 3064  | 1.09  | 99.02 |
| chr6 | 11989347 | 11998006 | 8660  | 0.05 | C_unshiu_00272 | 66236  | 57533  | 8704  | 3.11  | 98.94 |
| chr6 | 11998012 | 12001901 | 3890  | 0.02 | C_unshiu_00272 | 57386  | 53498  | 3889  | 1.39  | 99.51 |
| chr6 | 12004179 | 12005468 | 1290  | 0.01 | C_unshiu_00272 | 82968  | 81679  | 1290  | 0.46  | 99.38 |
| chr6 | 12005643 | 12007323 | 1681  | 0.01 | C_unshiu_00272 | 81040  | 79359  | 1682  | 0.6   | 99.41 |
| chr6 | 12010566 | 12035770 | 25205 | 0.14 | C_unshiu_00272 | 43304  | 18137  | 25168 | 8.99  | 99.27 |
| chr6 | 12036399 | 12038156 | 1758  | 0.01 | C_unshiu_00185 | 333511 | 331754 | 1758  | 0.51  | 98.35 |
| chr6 | 12039559 | 12047770 | 8212  | 0.05 | C_unshiu_00272 | 14421  | 6185   | 8237  | 2.94  | 99.36 |
| chr6 | 12051927 | 12054579 | 2653  | 0.02 | C_unshiu_00272 | 2660   | 1      | 2660  | 0.95  | 98.58 |
| chr6 | 12055842 | 12059755 | 3914  | 0.02 | C_unshiu_00624 | 63728  | 59825  | 3904  | 2.41  | 99.74 |
| chr6 | 12066786 | 12074067 | 7282  | 0.04 | C_unshiu_02521 | 22243  | 14983  | 7261  | 30.26 | 99.59 |
| chr6 | 12076700 | 12078641 | 1942  | 0.01 | C_unshiu_00106 | 180860 | 178932 | 1929  | 0.43  | 98.97 |
| chr6 | 12080954 | 12084050 | 3097  | 0.02 | C_unshiu_00106 | 177971 | 174874 | 3098  | 0.69  | 99.68 |
| chr6 | 12084711 | 12092339 | 7629  | 0.04 | C_unshiu_02521 | 7629   | 1      | 7629  | 31.79 | 99.82 |
| chr6 | 12096855 | 12102379 | 5525  | 0.03 | C_unshiu_00378 | 65154  | 59635  | 5520  | 2.4   | 98.66 |
| chr6 | 12133336 | 12140847 | 7512  | 0.04 | C_unshiu_01116 | 14270  | 21782  | 7513  | 7.98  | 99.85 |
| chr6 | 12141009 | 12144086 | 3078  | 0.02 | C_unshiu_01116 | 22076  | 25153  | 3078  | 3.27  | 100   |
| chr6 | 12144126 | 12145940 | 1815  | 0.01 | C_unshiu_01116 | 29920  | 31719  | 1800  | 1.91  | 99.17 |
| chr6 | 12145954 | 12162335 | 16382 | 0.09 | C_unshiu_00378 | 125935 | 109555 | 16381 | 7.11  | 99.71 |
| chr6 | 12162393 | 12168539 | 6147  | 0.03 | C_unshiu_02176 | 12627  | 6481   | 6147  | 18    | 99.97 |
| chr6 | 12171634 | 12176366 | 4733  | 0.03 | C_unshiu_02176 | 4733   | 1      | 4733  | 13.86 | 99.68 |
| chr6 | 12179528 | 12196783 | 17256 | 0.1  | C_unshiu_01713 | 51959  | 34704  | 17256 | 33.21 | 99.87 |
| chr6 | 12196635 | 12197708 | 1074  | 0.01 | C_unshiu_01713 | 34703  | 33631  | 1073  | 2.07  | 99.44 |
| chr6 | 12223753 | 12225505 | 1753  | 0.01 | C_unshiu_01104 | 95487  | 93748  | 1740  | 1.82  | 98    |
| chr6 | 12225505 | 12227182 | 1678  | 0.01 | C_unshiu_01104 | 93640  | 91965  | 1676  | 1.75  | 98.27 |
| chr6 | 12227975 | 12229273 | 1299  | 0.01 | C_unshiu_01104 | 90474  | 89176  | 1299  | 1.36  | 99.77 |
| chr6 | 12230952 | 12238355 | 7404  | 0.04 | C_unshiu_00232 | 7403   | 1      | 7403  | 2.41  | 99.41 |
| chr6 | 12238405 | 12242211 | 3807  | 0.02 | C_unshiu_01104 | 82195  | 78376  | 3820  | 3.99  | 99.03 |
| chr6 | 12242208 | 12244280 | 2073  | 0.01 | C_unshiu_00357 | 191253 | 193325 | 2073  | 0.87  | 100   |
| chr6 | 12244281 | 12248641 | 4361  | 0.02 | C_unshiu_01104 | 77748  | 73419  | 4330  | 4.52  | 98.6  |
| chr6 | 12257891 | 12264632 | 6742  | 0.04 | C_unshiu_01104 | 64564  | 57833  | 6732  | 7.03  | 98.92 |
| chr6 | 12266219 | 12267371 | 1153  | 0.01 | C_unshiu_01954 | 21474  | 22626  | 1153  | 2.71  | 99.57 |
| chr6 | 12267380 | 12268515 | 1136  | 0.01 | C_unshiu_01954 | 19956  | 21092  | 1137  | 2.68  | 99.82 |
| chr6 | 12269527 | 12270780 | 1254  | 0.01 | C_unshiu_01086 | 49410  | 50663  | 1254  | 1.29  | 99.76 |
| chr6 | 12271376 | 12272649 | 1274  | 0.01 | C_unshiu_01086 | 50511  | 51783  | 1273  | 1.31  | 99.37 |
| chr6 | 12273263 | 12274672 | 1410  | 0.01 | C_unshiu_01954 | 25966  | 27369  | 1404  | 3.3   | 99.08 |
| chr6 | 12276336 | 12278924 | 2589  | 0.01 | C_unshiu_01954 | 27322  | 29901  | 2580  | 6.07  | 99.58 |
| chr6 | 12283836 | 12287041 | 3206  | 0.02 | C_unshiu_01954 | 34044  | 37221  | 3178  | 7.48  | 99.13 |
| chr6 | 12287051 | 12291856 | 4806  | 0.03 | C_unshiu_01954 | 37709  | 42486  | 4778  | 11.25 | 98.94 |
| chr6 | 12307405 | 12315545 | 8141  | 0.05 | C_unshiu_01395 | 22576  | 14430  | 8147  | 11.53 | 99.53 |
| chr6 | 12332839 | 12335600 | 2762  | 0.02 | C_unshiu_01395 | 5241   | 2479   | 2763  | 3.91  | 99.71 |
| chr6 | 12337330 | 12347729 | 10400 | 0.06 | C_unshiu_00402 | 165323 | 154941 | 10383 | 4.67  | 98.97 |
| chr6 | 12347742 | 12359619 | 11878 | 0.07 | C_unshiu_00402 | 154388 | 142495 | 11894 | 5.35  | 98.76 |
| chr6 | 12360747 | 12366956 | 6210  | 0.04 | C_unshiu_00402 | 141587 | 135357 | 6231  | 2.8   | 98.37 |
| chr6 | 12381547 | 12385343 | 3797  | 0.02 | C_unshiu_00402 | 121282 | 117479 | 3804  | 1.71  | 99.53 |
| chr6 | 12388743 | 12391942 | 3200  | 0.02 | C_unshiu_00402 | 116261 | 113062 | 3200  | 1.44  | 99.97 |
| chr6 | 12408281 | 12417813 | 9533  | 0.05 | C_unshiu_00402 | 104450 | 94936  | 9515  | 4.28  | 98.77 |
| chr6 | 12419269 | 12428660 | 9392  | 0.05 | C_unshiu_00402 | 93829  | 84454  | 9376  | 4.22  | 98.5  |
| chr6 | 12428329 | 12433783 | 5455  | 0.03 | C_unshiu_00402 | 84683  | 79207  | 5477  | 2.46  | 99.49 |
| chr6 | 12434149 | 12436115 | 1967  | 0.01 | C_unshiu_01108 | 69592  | 71558  | 1967  | 2.06  | 100   |
| chr6 | 12441808 | 12444384 | 2577  | 0.01 | C_unshiu_01108 | 74779  | 77355  | 2577  | 2.7   | 99.84 |
| chr6 | 12444393 | 12445775 | 1383  | 0.01 | C_unshiu_01108 | 77958  | 79332  | 1375  | 1.44  | 99.28 |
| chr6 | 12449101 | 12453850 | 4750  | 0.03 | C_unshiu_00402 | 70713  | 65965  | 4749  | 2.14  | 99.85 |
| chr6 | 12464835 | 12466756 | 1922  | 0.01 | C_unshiu_01108 | 86928  | 88849  | 1922  | 2.02  | 100   |
| chr6 | 12466756 | 12474942 | 8187  | 0.05 | C_unshiu_00402 | 58371  | 50166  | 8206  | 3.69  | 99.33 |
| chr6 | 12478410 | 12486448 | 8039  | 0.05 | C_unshiu_00402 | 47004  | 38966  | 8039  | 3.62  | 99.99 |
| chr6 | 12487201 | 12491636 | 4436  | 0.03 | C_unshiu_00402 | 38051  | 33616  | 4436  | 2     | 99.98 |
| chr6 | 12494743 | 12501642 | 6900  | 0.04 | C_unshiu_00402 | 31575  | 24667  | 6909  | 3.11  | 98.97 |
| chr6 | 12502960 | 12506474 | 3515  | 0.02 | C_unshiu_00402 | 22726  | 19214  | 3513  | 1.58  | 99.01 |
| chr6 | 12507416 | 12513977 | 6562  | 0.04 | C_unshiu_00402 | 18012  | 11435  | 6578  | 2.96  | 98.86 |
| chr6 | 12529551 | 12530589 | 1039  | 0.01 | C_unshiu_00215 | 56638  | 55601  | 1038  | 0.32  | 98.46 |
| chr6 | 12536748 | 12537880 | 1133  | 0.01 | C_unshiu_02317 | 1      | 1133   | 1133  | 3.86  | 100   |
| chr6 | 12580130 | 12587226 | 7097  | 0.04 | C_unshiu_00848 | 103737 | 96623  | 7115  | 5.79  | 98.04 |
| chr6 | 12590483 | 12591829 | 1347  | 0.01 | C_unshiu_00389 | 2267   | 3624   | 1358  | 0.6   | 98.75 |
| chr6 | 12591989 | 12594439 | 2451  | 0.01 | C_unshiu_00389 | 4824   | 7273   | 2450  | 1.09  | 99.18 |

|      |          |          |       |      |                |        |        |       |       |       |
|------|----------|----------|-------|------|----------------|--------|--------|-------|-------|-------|
| chr6 | 12597542 | 12637252 | 39711 | 0.22 | C_unshiu_00389 | 10863  | 50571  | 39709 | 17.61 | 99.86 |
| chr6 | 12676431 | 12678862 | 2432  | 0.01 | C_unshiu_00715 | 18273  | 20704  | 2432  | 1.71  | 100   |
| chr6 | 12679327 | 12686228 | 6902  | 0.04 | C_unshiu_00715 | 21086  | 27988  | 6903  | 4.87  | 99.99 |
| chr6 | 12688536 | 12743403 | 54868 | 0.31 | C_unshiu_00715 | 31209  | 86074  | 54866 | 38.67 | 99.8  |
| chr6 | 12742308 | 12750229 | 7922  | 0.04 | C_unshiu_00715 | 85325  | 93275  | 7951  | 5.6   | 99.35 |
| chr6 | 12749840 | 12757012 | 7173  | 0.04 | C_unshiu_00715 | 97925  | 105105 | 7181  | 5.06  | 99.79 |
| chr6 | 12773810 | 12793445 | 19636 | 0.11 | C_unshiu_00715 | 104312 | 124011 | 19700 | 13.88 | 99.35 |
| chr6 | 12794979 | 12808211 | 13233 | 0.07 | C_unshiu_00232 | 100842 | 87593  | 13250 | 4.32  | 98.86 |
| chr6 | 12818286 | 12822719 | 4434  | 0.03 | C_unshiu_00232 | 77326  | 72895  | 4432  | 1.45  | 99.57 |
| chr6 | 12822713 | 12823813 | 1101  | 0.01 | C_unshiu_00796 | 115022 | 113922 | 1101  | 0.86  | 100   |
| chr6 | 12839642 | 12841129 | 1488  | 0.01 | C_unshiu_00232 | 55204  | 53713  | 1492  | 0.49  | 98.32 |
| chr6 | 12852238 | 12854695 | 2458  | 0.01 | C_unshiu_00232 | 51222  | 48766  | 2457  | 0.8   | 98.54 |
| chr6 | 12864255 | 12866433 | 2179  | 0.01 | C_unshiu_00232 | 46338  | 44153  | 2186  | 0.71  | 98.95 |
| chr6 | 12878077 | 12883176 | 5100  | 0.03 | C_unshiu_00232 | 35258  | 30135  | 5124  | 1.67  | 98.5  |
| chr6 | 12896436 | 12897496 | 1061  | 0.01 | C_unshiu_00147 | 117890 | 116830 | 1061  | 0.27  | 99.91 |
| chr6 | 12910784 | 12926141 | 15358 | 0.09 | C_unshiu_00860 | 43235  | 27863  | 15373 | 12.64 | 98.52 |
| chr6 | 12931337 | 12938235 | 6899  | 0.04 | C_unshiu_00860 | 23110  | 16199  | 6912  | 5.68  | 99.19 |
| chr6 | 12941736 | 12948971 | 7236  | 0.04 | C_unshiu_00147 | 85682  | 78447  | 7236  | 1.86  | 99.94 |
| chr6 | 12950806 | 12974905 | 24100 | 0.14 | C_unshiu_00147 | 75670  | 51553  | 24118 | 6.18  | 98.07 |
| chr6 | 12981481 | 12983028 | 1548  | 0.01 | C_unshiu_01881 | 45326  | 43802  | 1525  | 3.36  | 98.39 |
| chr6 | 12983988 | 12988002 | 4015  | 0.02 | C_unshiu_01881 | 42402  | 38387  | 4016  | 8.86  | 99.98 |
| chr6 | 12989371 | 12994725 | 5355  | 0.03 | C_unshiu_01528 | 8055   | 2703   | 5353  | 8.66  | 99.78 |
| chr6 | 12995463 | 12996875 | 1413  | 0.01 | C_unshiu_01881 | 33193  | 31781  | 1413  | 3.12  | 100   |
| chr6 | 12997774 | 13003709 | 5936  | 0.03 | C_unshiu_01881 | 30573  | 24639  | 5935  | 13.09 | 99.95 |
| chr6 | 13004288 | 13019824 | 15537 | 0.09 | C_unshiu_01881 | 23736  | 8187   | 15550 | 34.3  | 98.54 |
| chr6 | 13019932 | 13027768 | 7837  | 0.04 | C_unshiu_01881 | 7865   | 2      | 7864  | 17.34 | 99.57 |
| chr6 | 13086969 | 13090290 | 3322  | 0.02 | C_unshiu_02435 | 23100  | 19781  | 3320  | 12.52 | 99.46 |
| chr6 | 13107494 | 13109405 | 1912  | 0.01 | C_unshiu_02348 | 8138   | 6234   | 1905  | 6.71  | 98.43 |
| chr6 | 13109496 | 13115726 | 6231  | 0.04 | C_unshiu_02348 | 6236   | 1      | 6236  | 21.98 | 98.4  |
| chr6 | 13113323 | 13127426 | 14104 | 0.08 | C_unshiu_00231 | 281717 | 267629 | 14089 | 4.59  | 98.82 |
| chr6 | 13128067 | 13130223 | 2157  | 0.01 | C_unshiu_00231 | 267637 | 265473 | 2165  | 0.71  | 98.57 |
| chr6 | 13148075 | 13155244 | 7170  | 0.04 | C_unshiu_00231 | 252617 | 245470 | 7148  | 2.33  | 98.33 |
| chr6 | 13155230 | 13158666 | 3437  | 0.02 | C_unshiu_00231 | 245129 | 241691 | 3439  | 1.12  | 99.36 |
| chr6 | 13171110 | 13173365 | 2256  | 0.01 | C_unshiu_00231 | 228986 | 226716 | 2271  | 0.74  | 98.24 |
| chr6 | 13182257 | 13183504 | 1248  | 0.01 | C_unshiu_00231 | 226716 | 225469 | 1248  | 0.41  | 99.84 |
| chr6 | 13189590 | 13195353 | 5764  | 0.03 | C_unshiu_01461 | 49354  | 55119  | 5766  | 8.75  | 99.91 |
| chr6 | 13196431 | 13200388 | 3958  | 0.02 | C_unshiu_01461 | 56482  | 60439  | 3958  | 6.01  | 99.92 |
| chr6 | 13200389 | 13203188 | 2800  | 0.02 | C_unshiu_01461 | 60374  | 63173  | 2800  | 4.25  | 100   |
| chr6 | 13203241 | 13204675 | 1435  | 0.01 | C_unshiu_01461 | 63499  | 64932  | 1434  | 2.18  | 99.93 |
| chr6 | 13209258 | 13210991 | 1734  | 0.01 | C_unshiu_00309 | 209499 | 207766 | 1734  | 0.67  | 100   |
| chr6 | 13218540 | 13222705 | 4166  | 0.02 | C_unshiu_02072 | 29121  | 24958  | 4164  | 11.03 | 99.3  |
| chr6 | 13228670 | 13235000 | 6331  | 0.04 | C_unshiu_02072 | 15803  | 9460   | 6344  | 16.8  | 98.6  |
| chr6 | 13253376 | 13256210 | 2835  | 0.02 | C_unshiu_01454 | 272    | 3097   | 2826  | 4.27  | 99.61 |
| chr6 | 13266496 | 13290315 | 23820 | 0.13 | C_unshiu_00515 | 19862  | 43661  | 23800 | 12.76 | 99.68 |
| chr6 | 13291038 | 13293036 | 1999  | 0.01 | C_unshiu_01454 | 34762  | 36755  | 1994  | 3.01  | 98.05 |
| chr6 | 13311567 | 13329778 | 18212 | 0.1  | C_unshiu_00515 | 62945  | 81206  | 18262 | 9.79  | 98.26 |
| chr6 | 13330490 | 13333491 | 3002  | 0.02 | C_unshiu_00515 | 82783  | 85797  | 3015  | 1.62  | 98.01 |
| chr6 | 13333512 | 13335744 | 2233  | 0.01 | C_unshiu_00515 | 91767  | 94004  | 2238  | 1.2   | 99.15 |
| chr6 | 13335886 | 13338890 | 3005  | 0.02 | C_unshiu_00515 | 88447  | 91451  | 3005  | 1.61  | 100   |
| chr6 | 13353668 | 13355240 | 1573  | 0.01 | C_unshiu_00515 | 106460 | 108032 | 1573  | 0.84  | 99.81 |
| chr6 | 13376494 | 13380908 | 4415  | 0.02 | C_unshiu_00515 | 115650 | 120064 | 4415  | 2.37  | 100   |
| chr6 | 13381702 | 13383470 | 1769  | 0.01 | C_unshiu_00515 | 121170 | 122943 | 1774  | 0.95  | 99.55 |
| chr6 | 13383806 | 13386932 | 3127  | 0.02 | C_unshiu_00515 | 124025 | 127151 | 3127  | 1.68  | 100   |
| chr6 | 13391490 | 13423835 | 32346 | 0.18 | C_unshiu_00515 | 131132 | 163477 | 32346 | 17.34 | 99.97 |
| chr6 | 13427509 | 13429796 | 2288  | 0.01 | C_unshiu_00515 | 166990 | 169277 | 2288  | 1.23  | 99.74 |
| chr6 | 13430477 | 13432752 | 2276  | 0.01 | C_unshiu_00515 | 170197 | 172473 | 2277  | 1.22  | 99.65 |
| chr6 | 13450152 | 13468723 | 18572 | 0.11 | C_unshiu_01055 | 20939  | 39526  | 18588 | 18.64 | 99.52 |
| chr6 | 13468807 | 13478138 | 9332  | 0.05 | C_unshiu_01055 | 39625  | 48901  | 9277  | 9.3   | 99.04 |
| chr6 | 13478257 | 13486488 | 8232  | 0.05 | C_unshiu_01055 | 49031  | 57263  | 8233  | 8.26  | 99.81 |
| chr6 | 13487610 | 13495473 | 7864  | 0.04 | C_unshiu_01055 | 56854  | 64706  | 7853  | 7.88  | 98.18 |
| chr6 | 13498582 | 13507262 | 8681  | 0.05 | C_unshiu_01055 | 66715  | 75435  | 8721  | 8.75  | 98.15 |
| chr6 | 13512882 | 13514088 | 1207  | 0.01 | C_unshiu_01277 | 13326  | 14529  | 1204  | 1.52  | 98.51 |
| chr6 | 13527074 | 13535621 | 8548  | 0.05 | C_unshiu_01055 | 75420  | 84032  | 8613  | 8.64  | 98.21 |
| chr6 | 13545237 | 13555147 | 9911  | 0.06 | C_unshiu_00806 | 1      | 9942   | 9942  | 7.78  | 98.32 |
| chr6 | 13555135 | 13566413 | 11279 | 0.06 | C_unshiu_00806 | 10905  | 22196  | 11292 | 8.84  | 99.21 |
| chr6 | 13570897 | 13589056 | 18160 | 0.1  | C_unshiu_00806 | 27210  | 45326  | 18117 | 14.18 | 99.28 |
| chr6 | 13589068 | 13590264 | 1197  | 0.01 | C_unshiu_00806 | 45685  | 46886  | 1202  | 0.94  | 98.84 |
| chr6 | 13594178 | 13595526 | 1349  | 0.01 | C_unshiu_00806 | 49773  | 51128  | 1356  | 1.06  | 99.41 |
| chr6 | 13623377 | 13642102 | 18726 | 0.11 | C_unshiu_00463 | 79297  | 98020  | 18724 | 9.2   | 99.87 |
| chr6 | 13645834 | 13647118 | 1285  | 0.01 | C_unshiu_02892 | 8090   | 6804   | 1287  | 8.07  | 99.3  |
| chr6 | 13646117 | 13651216 | 5100  | 0.03 | C_unshiu_00463 | 103012 | 108104 | 5093  | 2.5   | 99.55 |
| chr6 | 13651861 | 13654270 | 2410  | 0.01 | C_unshiu_00463 | 109539 | 111948 | 2410  | 1.18  | 100   |
| chr6 | 13654848 | 13664675 | 9828  | 0.06 | C_unshiu_00463 | 112811 | 122642 | 9832  | 4.83  | 99.69 |
| chr6 | 13668074 | 13670301 | 2228  | 0.01 | C_unshiu_00463 | 127725 | 129955 | 2231  | 1.1   | 98.88 |
| chr6 | 13671905 | 13673683 | 1779  | 0.01 | C_unshiu_00463 | 132237 | 134014 | 1778  | 0.87  | 99.33 |
| chr6 | 13697296 | 13700347 | 3052  | 0.02 | C_unshiu_00463 | 157357 | 160405 | 3049  | 1.5   | 99.9  |
| chr6 | 13702602 | 13703862 | 1261  | 0.01 | C_unshiu_00463 | 161942 | 163202 | 1261  | 0.62  | 99.92 |
| chr6 | 13705254 | 13712644 | 7391  | 0.04 | C_unshiu_00463 | 164797 | 172176 | 7380  | 3.62  | 98.62 |
| chr6 | 13716417 | 13719995 | 3579  | 0.02 | C_unshiu_02092 | 4099   | 569    | 3531  | 9.59  | 98.24 |

|      |          |          |       |      |                |        |        |       |       |       |
|------|----------|----------|-------|------|----------------|--------|--------|-------|-------|-------|
| chr6 | 13722465 | 13724686 | 2222  | 0.01 | C_unshiu_00463 | 173583 | 175780 | 2198  | 1.08  | 98.52 |
| chr6 | 13728404 | 13729695 | 1292  | 0.01 | C_unshiu_00463 | 179053 | 180344 | 1292  | 0.63  | 100   |
| chr6 | 13750369 | 13754599 | 4231  | 0.02 | C_unshiu_00106 | 277340 | 281585 | 4246  | 0.94  | 98.99 |
| chr6 | 13757303 | 13759294 | 1992  | 0.01 | C_unshiu_00050 | 420752 | 422743 | 1992  | 0.33  | 99.4  |
| chr6 | 13789061 | 13797824 | 8764  | 0.05 | C_unshiu_00631 | 157329 | 148541 | 8789  | 5.48  | 98.41 |
| chr6 | 13797940 | 13801086 | 3147  | 0.02 | C_unshiu_00631 | 148546 | 145409 | 3138  | 1.96  | 99.08 |
| chr6 | 13801550 | 13808529 | 6980  | 0.04 | C_unshiu_01887 | 39506  | 32515  | 6992  | 15.49 | 98.74 |
| chr6 | 13815510 | 13822292 | 6783  | 0.04 | C_unshiu_01887 | 24083  | 17293  | 6791  | 15.05 | 99.32 |
| chr6 | 13833084 | 13836445 | 3362  | 0.02 | C_unshiu_01887 | 7776   | 4417   | 3360  | 7.45  | 99.94 |
| chr6 | 13839495 | 13840825 | 1331  | 0.01 | C_unshiu_00447 | 193147 | 194478 | 1332  | 0.64  | 98.8  |
| chr6 | 13842456 | 13844603 | 2148  | 0.01 | C_unshiu_02325 | 19624  | 17477  | 2148  | 7.37  | 99.95 |
| chr6 | 13857443 | 13863494 | 6052  | 0.03 | C_unshiu_02325 | 18082  | 12017  | 6066  | 20.82 | 98.18 |
| chr6 | 13874193 | 13879171 | 4979  | 0.03 | C_unshiu_02373 | 25896  | 20918  | 4979  | 17.88 | 99.94 |
| chr6 | 13881564 | 13883556 | 1993  | 0.01 | C_unshiu_02373 | 27841  | 25849  | 1993  | 7.16  | 99.45 |
| chr6 | 13890620 | 13892677 | 2058  | 0.01 | C_unshiu_01824 | 10431  | 8375   | 2057  | 4.33  | 98.84 |
| chr6 | 13899466 | 13900541 | 1076  | 0.01 | C_unshiu_01824 | 1076   | 1      | 1076  | 2.27  | 99.16 |
| chr6 | 13911451 | 13913001 | 1551  | 0.01 | C_unshiu_01499 | 59599  | 58050  | 1550  | 2.45  | 98.65 |
| chr6 | 13913674 | 13921930 | 8257  | 0.05 | C_unshiu_00711 | 134291 | 125999 | 8293  | 5.83  | 98.46 |
| chr6 | 13977521 | 13984956 | 7436  | 0.04 | C_unshiu_00976 | 39581  | 47070  | 7490  | 6.88  | 98.59 |
| chr6 | 13984946 | 13999123 | 14178 | 0.08 | C_unshiu_00976 | 47317  | 61467  | 14151 | 12.99 | 98.93 |
| chr6 | 14009377 | 14030752 | 21376 | 0.12 | C_unshiu_00407 | 1      | 21266  | 21266 | 9.58  | 99.34 |
| chr6 | 14033971 | 14035016 | 1046  | 0.01 | C_unshiu_01614 | 45059  | 46104  | 1046  | 1.84  | 99.81 |
| chr6 | 14038811 | 14051847 | 13037 | 0.07 | C_unshiu_00215 | 8338   | 21373  | 13036 | 4.04  | 99.9  |
| chr6 | 14052956 | 14054106 | 1151  | 0.01 | C_unshiu_00215 | 22908  | 24059  | 1152  | 0.36  | 99.91 |
| chr6 | 14054243 | 14056414 | 2172  | 0.01 | C_unshiu_00215 | 24225  | 26394  | 2170  | 0.67  | 99.59 |
| chr6 | 14055337 | 14059860 | 4524  | 0.03 | C_unshiu_00215 | 29620  | 34159  | 4540  | 1.41  | 99.36 |
| chr6 | 14060767 | 14062631 | 1865  | 0.01 | C_unshiu_00215 | 35123  | 36991  | 1869  | 0.58  | 98.08 |
| chr6 | 14066607 | 14069582 | 2976  | 0.02 | C_unshiu_01234 | 70931  | 73905  | 2975  | 3.62  | 99.3  |
| chr6 | 14076743 | 14082843 | 6101  | 0.03 | C_unshiu_00475 | 11000  | 17115  | 6116  | 3.05  | 99.15 |
| chr6 | 14083876 | 14091541 | 7666  | 0.04 | C_unshiu_00475 | 19082  | 26746  | 7665  | 3.82  | 98.49 |
| chr6 | 14135089 | 14146901 | 11813 | 0.07 | C_unshiu_00475 | 68679  | 80551  | 11873 | 5.92  | 98.54 |
| chr6 | 14162060 | 14171270 | 9211  | 0.05 | C_unshiu_00475 | 97077  | 106345 | 9269  | 4.62  | 98.09 |
| chr6 | 14163173 | 14173426 | 10254 | 0.06 | C_unshiu_02712 | 16667  | 6445   | 10223 | 51.97 | 98.14 |
| chr6 | 14182390 | 14204424 | 22035 | 0.12 | C_unshiu_00005 | 2276   | 24428  | 22153 | 1.96  | 98.46 |
| chr6 | 14204946 | 14206202 | 1257  | 0.01 | C_unshiu_00005 | 25237  | 26493  | 1257  | 0.11  | 99.36 |
| chr6 | 14207247 | 14209366 | 2120  | 0.01 | C_unshiu_00005 | 27910  | 30029  | 2120  | 0.19  | 99.34 |
| chr6 | 14211752 | 14215005 | 3254  | 0.02 | C_unshiu_00005 | 31326  | 34579  | 3254  | 0.29  | 99.97 |
| chr6 | 14214650 | 14221075 | 6426  | 0.04 | C_unshiu_00005 | 34576  | 41012  | 6437  | 0.57  | 99.47 |
| chr6 | 14217519 | 14221689 | 4171  | 0.02 | C_unshiu_00475 | 129406 | 133571 | 4166  | 2.08  | 98.32 |
| chr6 | 14231602 | 14242717 | 11116 | 0.06 | C_unshiu_00475 | 137833 | 148950 | 11118 | 5.54  | 99.13 |
| chr6 | 14253897 | 14254959 | 1063  | 0.01 | C_unshiu_00475 | 167750 | 168812 | 1063  | 0.53  | 100   |
| chr6 | 14255985 | 14257161 | 1177  | 0.01 | C_unshiu_00475 | 173942 | 175124 | 1183  | 0.59  | 98.4  |
| chr6 | 14258360 | 14259731 | 1372  | 0.01 | C_unshiu_00106 | 333080 | 331710 | 1371  | 0.3   | 99.05 |
| chr6 | 14261137 | 14263936 | 2800  | 0.02 | C_unshiu_00106 | 329954 | 327155 | 2800  | 0.62  | 99.82 |
| chr6 | 14265131 | 14266889 | 1759  | 0.01 | C_unshiu_00106 | 325501 | 323743 | 1759  | 0.39  | 100   |
| chr6 | 14266891 | 14267988 | 1098  | 0.01 | C_unshiu_00475 | 168821 | 169928 | 1108  | 0.55  | 98.47 |
| chr6 | 14269504 | 14270645 | 1142  | 0.01 | C_unshiu_00106 | 334187 | 333038 | 1150  | 0.26  | 98.61 |
| chr6 | 14272670 | 14273750 | 1081  | 0.01 | C_unshiu_00475 | 177834 | 178914 | 1081  | 0.54  | 99.35 |
| chr6 | 14276205 | 14289193 | 12989 | 0.07 | C_unshiu_00106 | 315586 | 302605 | 12982 | 2.88  | 99.25 |
| chr6 | 14290013 | 14304698 | 14686 | 0.08 | C_unshiu_00106 | 301748 | 287035 | 14714 | 3.27  | 98.52 |
| chr6 | 14308676 | 14312321 | 3646  | 0.02 | C_unshiu_00106 | 285188 | 281523 | 3666  | 0.81  | 98.64 |
| chr6 | 14319255 | 14334605 | 15351 | 0.09 | C_unshiu_00106 | 274739 | 259381 | 15359 | 3.41  | 98.23 |
| chr6 | 14346780 | 14348650 | 1871  | 0.01 | C_unshiu_00106 | 248968 | 247097 | 1872  | 0.42  | 99.68 |
| chr6 | 14357463 | 14363772 | 6310  | 0.04 | C_unshiu_00106 | 239560 | 233232 | 6329  | 1.41  | 98.26 |
| chr6 | 14363896 | 14368324 | 4429  | 0.03 | C_unshiu_00106 | 233240 | 228807 | 4434  | 0.98  | 99.03 |
| chr6 | 14376775 | 14378324 | 1550  | 0.01 | C_unshiu_00106 | 223019 | 221470 | 1550  | 0.34  | 99.16 |
| chr6 | 14382989 | 14389408 | 6420  | 0.04 | C_unshiu_00106 | 217868 | 211436 | 6433  | 1.43  | 98.35 |
| chr6 | 14389400 | 14392673 | 3274  | 0.02 | C_unshiu_00106 | 211109 | 207836 | 3274  | 0.73  | 99.76 |
| chr6 | 14392839 | 14394293 | 1455  | 0.01 | C_unshiu_00106 | 207654 | 206200 | 1455  | 0.32  | 100   |
| chr6 | 14395659 | 14413352 | 17694 | 0.1  | C_unshiu_00106 | 203517 | 185808 | 17710 | 3.93  | 98.72 |
| chr6 | 14433858 | 14450106 | 16249 | 0.09 | C_unshiu_00106 | 163821 | 147588 | 16234 | 3.61  | 98.22 |
| chr6 | 14448962 | 14457324 | 8363  | 0.05 | C_unshiu_02558 | 1      | 8337   | 8337  | 36.11 | 98.28 |
| chr6 | 14460920 | 14462684 | 1765  | 0.01 | C_unshiu_02558 | 12348  | 14098  | 1751  | 7.58  | 98.75 |
| chr6 | 14464888 | 14466290 | 1403  | 0.01 | C_unshiu_02558 | 16751  | 18153  | 1403  | 6.08  | 100   |
| chr6 | 14466295 | 14470645 | 4351  | 0.02 | C_unshiu_02558 | 18362  | 22714  | 4353  | 18.85 | 99.77 |
| chr6 | 14481596 | 14487663 | 6068  | 0.03 | C_unshiu_00106 | 138188 | 132134 | 6055  | 1.34  | 98.17 |
| chr6 | 14509340 | 14519790 | 10451 | 0.06 | C_unshiu_00106 | 117405 | 107007 | 10399 | 2.31  | 99.17 |
| chr6 | 14534201 | 14536616 | 2416  | 0.01 | C_unshiu_00256 | 214744 | 212331 | 2414  | 0.83  | 99.42 |
| chr6 | 14547463 | 14548537 | 1075  | 0.01 | C_unshiu_00205 | 313788 | 314864 | 1077  | 0.33  | 99.26 |
| chr6 | 14602127 | 14607936 | 5810  | 0.03 | C_unshiu_01388 | 58682  | 52847  | 5836  | 8.2   | 98.97 |
| chr6 | 14616839 | 14621557 | 4719  | 0.03 | C_unshiu_01388 | 52689  | 47947  | 4743  | 6.66  | 98.88 |
| chr6 | 14619872 | 14622438 | 2567  | 0.01 | C_unshiu_00915 | 2340   | 4904   | 2565  | 2.22  | 98.56 |
| chr6 | 14625817 | 14631701 | 5885  | 0.03 | C_unshiu_00915 | 9420   | 15317  | 5898  | 5.11  | 99.75 |
| chr6 | 14647863 | 14660665 | 12803 | 0.07 | C_unshiu_01764 | 821    | 13626  | 12806 | 25.68 | 99.97 |
| chr6 | 14659087 | 14660665 | 1579  | 0.01 | C_unshiu_00474 | 1      | 1581   | 1581  | 0.79  | 99.49 |
| chr6 | 14661224 | 14668508 | 7285  | 0.04 | C_unshiu_00474 | 2495   | 9777   | 7283  | 3.63  | 99.77 |
| chr6 | 14668589 | 14672489 | 3901  | 0.02 | C_unshiu_00474 | 9887   | 13787  | 3901  | 1.94  | 99.97 |
| chr6 | 14688208 | 14705512 | 17305 | 0.1  | C_unshiu_01786 | 11037  | 28378  | 17342 | 35.32 | 99.53 |
| chr6 | 14705701 | 14706936 | 1236  | 0.01 | C_unshiu_01786 | 28689  | 29922  | 1234  | 2.51  | 98.95 |

|      |          |          |       |      |                |        |        |       |       |       |
|------|----------|----------|-------|------|----------------|--------|--------|-------|-------|-------|
| chr6 | 14707743 | 14708943 | 1201  | 0.01 | C_unshiu_01145 | 23443  | 24643  | 1201  | 1.31  | 100   |
| chr6 | 14730476 | 14740372 | 9897  | 0.06 | C_unshiu_02323 | 29192  | 19292  | 9901  | 33.92 | 99.93 |
| chr6 | 14741948 | 14743254 | 1307  | 0.01 | C_unshiu_02323 | 17388  | 16083  | 1306  | 4.47  | 99.24 |
| chr6 | 14745295 | 14754897 | 9603  | 0.05 | C_unshiu_02323 | 14022  | 4443   | 9580  | 32.82 | 99.68 |
| chr6 | 14754998 | 14757662 | 2665  | 0.02 | C_unshiu_01321 | 64760  | 67424  | 2665  | 3.53  | 99.63 |
| chr6 | 14761461 | 14765095 | 3635  | 0.02 | C_unshiu_01321 | 71759  | 75393  | 3635  | 4.82  | 100   |
| chr6 | 14777957 | 14782476 | 4520  | 0.03 | C_unshiu_00267 | 247957 | 252466 | 4510  | 1.6   | 98.34 |
| chr6 | 14783012 | 14786019 | 3008  | 0.02 | C_unshiu_00267 | 254215 | 257214 | 3000  | 1.06  | 98.57 |
| chr6 | 14786951 | 14795046 | 8096  | 0.05 | C_unshiu_00267 | 258366 | 266522 | 8157  | 2.89  | 98.21 |
| chr6 | 14812419 | 14820581 | 8163  | 0.05 | C_unshiu_02355 | 28248  | 20118  | 8131  | 28.78 | 99.3  |
| chr6 | 14821132 | 14823661 | 2530  | 0.01 | C_unshiu_02355 | 21639  | 19111  | 2529  | 8.95  | 99.41 |
| chr6 | 14835799 | 14875997 | 40199 | 0.23 | C_unshiu_00036 | 642782 | 682935 | 40154 | 5.88  | 99.7  |
| chr6 | 14873161 | 14883196 | 10036 | 0.06 | C_unshiu_00036 | 616912 | 626954 | 10043 | 1.47  | 99.36 |
| chr6 | 14883998 | 14899666 | 15669 | 0.09 | C_unshiu_02434 | 4      | 15637  | 15634 | 58.73 | 99.62 |
| chr6 | 14900245 | 14910660 | 10416 | 0.06 | C_unshiu_02434 | 16201  | 26620  | 10420 | 39.14 | 99.89 |
| chr6 | 14913199 | 14915062 | 1864  | 0.01 | C_unshiu_00597 | 122948 | 121084 | 1865  | 1.11  | 99.04 |
| chr6 | 14927749 | 14940965 | 13217 | 0.07 | C_unshiu_00597 | 113372 | 100160 | 13213 | 7.85  | 98.99 |
| chr6 | 14941062 | 14942731 | 1670  | 0.01 | C_unshiu_00597 | 99930  | 98261  | 1670  | 0.99  | 99.4  |
| chr6 | 14943505 | 14946169 | 2665  | 0.02 | C_unshiu_00597 | 98080  | 95422  | 2659  | 1.58  | 99.59 |
| chr6 | 14946162 | 14955033 | 8872  | 0.05 | C_unshiu_00597 | 94532  | 85626  | 8907  | 5.29  | 98.89 |
| chr6 | 14956946 | 14961990 | 5045  | 0.03 | C_unshiu_00597 | 80067  | 75016  | 5052  | 3     | 98.87 |
| chr6 | 14964050 | 14998252 | 34203 | 0.19 | C_unshiu_00597 | 75086  | 40934  | 34153 | 20.28 | 99.11 |
| chr6 | 14999542 | 15005657 | 6116  | 0.03 | C_unshiu_00597 | 40938  | 34858  | 6081  | 3.61  | 98.69 |
| chr6 | 15014959 | 15024064 | 9106  | 0.05 | C_unshiu_00597 | 17255  | 8103   | 9153  | 5.44  | 98.25 |
| chr6 | 15024047 | 15030060 | 6014  | 0.03 | C_unshiu_00597 | 6018   | 1      | 6018  | 3.57  | 99.7  |
| chr6 | 15025355 | 15104874 | 79520 | 0.45 | C_unshiu_00155 | 1      | 79640  | 79640 | 20.89 | 99.49 |
| chr6 | 15105101 | 15115341 | 10241 | 0.06 | C_unshiu_00155 | 80398  | 90616  | 10219 | 2.68  | 99.21 |
| chr6 | 15115567 | 15135536 | 19970 | 0.11 | C_unshiu_00155 | 91528  | 111508 | 19981 | 5.24  | 98.73 |
| chr6 | 15144268 | 15148233 | 3966  | 0.02 | C_unshiu_00155 | 121739 | 125716 | 3978  | 1.04  | 98.94 |
| chr6 | 15148596 | 15151419 | 2824  | 0.02 | C_unshiu_00155 | 126671 | 129498 | 2828  | 0.74  | 98.91 |
| chr6 | 15151412 | 15165031 | 13620 | 0.08 | C_unshiu_00155 | 130162 | 143809 | 13648 | 3.58  | 99.49 |
| chr6 | 15175374 | 15203226 | 27853 | 0.16 | C_unshiu_00155 | 152039 | 179890 | 27852 | 7.31  | 99.35 |
| chr6 | 15203226 | 15208151 | 4926  | 0.03 | C_unshiu_00155 | 180183 | 185139 | 4957  | 1.3   | 98.02 |
| chr6 | 15208155 | 15213169 | 5015  | 0.03 | C_unshiu_00155 | 185396 | 190418 | 5023  | 1.32  | 99.18 |
| chr6 | 15213507 | 15215743 | 2237  | 0.01 | C_unshiu_00155 | 191074 | 193310 | 2237  | 0.59  | 99.73 |
| chr6 | 15216491 | 15220968 | 4478  | 0.03 | C_unshiu_00155 | 193673 | 198154 | 4482  | 1.18  | 99.42 |
| chr6 | 15221349 | 15252517 | 31169 | 0.18 | C_unshiu_00155 | 197386 | 228599 | 31214 | 8.19  | 99.53 |
| chr6 | 15258940 | 15275385 | 16446 | 0.09 | C_unshiu_00155 | 233894 | 250369 | 16476 | 4.32  | 98.71 |
| chr6 | 15280608 | 15290550 | 9943  | 0.06 | C_unshiu_00155 | 256691 | 266728 | 10038 | 2.63  | 98.63 |
| chr6 | 15292090 | 15300460 | 8371  | 0.05 | C_unshiu_00155 | 266720 | 275118 | 8399  | 2.2   | 98.95 |
| chr6 | 15304801 | 15311352 | 6552  | 0.04 | C_unshiu_00155 | 280103 | 286652 | 6550  | 1.72  | 98.98 |
| chr6 | 15311427 | 15323907 | 12481 | 0.07 | C_unshiu_00155 | 286909 | 299421 | 12513 | 3.28  | 99.2  |
| chr6 | 15325146 | 15333202 | 8057  | 0.05 | C_unshiu_00155 | 299465 | 307518 | 8054  | 2.11  | 98.75 |
| chr6 | 15333290 | 15357945 | 24656 | 0.14 | C_unshiu_00155 | 307981 | 332694 | 24714 | 6.48  | 99.19 |
| chr6 | 15363896 | 15365778 | 1883  | 0.01 | C_unshiu_00446 | 75650  | 73768  | 1883  | 0.9   | 99.58 |
| chr6 | 15366199 | 15381714 | 15516 | 0.09 | C_unshiu_00446 | 73083  | 57576  | 15508 | 7.42  | 98.79 |
| chr6 | 15381710 | 15395743 | 14034 | 0.08 | C_unshiu_00446 | 56354  | 42284  | 14071 | 6.73  | 98.77 |
| chr6 | 15398128 | 15401700 | 3573  | 0.02 | C_unshiu_00446 | 40882  | 37310  | 3573  | 1.71  | 99.64 |
| chr6 | 15402097 | 15412363 | 10267 | 0.06 | C_unshiu_00446 | 37311  | 27023  | 10289 | 4.92  | 99.29 |
| chr6 | 15414404 | 15419274 | 4871  | 0.03 | C_unshiu_00446 | 21006  | 16140  | 4867  | 2.33  | 99.45 |
| chr6 | 15436427 | 15439462 | 3036  | 0.02 | C_unshiu_00277 | 277269 | 274234 | 3036  | 1.09  | 100   |
| chr6 | 15441575 | 15443649 | 2075  | 0.01 | C_unshiu_00277 | 271274 | 269210 | 2065  | 0.74  | 98.65 |
| chr6 | 15443643 | 15446004 | 2362  | 0.01 | C_unshiu_00364 | 155658 | 158019 | 2362  | 1.01  | 100   |
| chr6 | 15446006 | 15450166 | 4161  | 0.02 | C_unshiu_00277 | 265938 | 261774 | 4165  | 1.5   | 98.87 |
| chr6 | 15457588 | 15462628 | 5041  | 0.03 | C_unshiu_00277 | 260748 | 255703 | 5046  | 1.81  | 99.56 |
| chr6 | 15465071 | 15479422 | 14352 | 0.08 | C_unshiu_00277 | 254470 | 240106 | 14365 | 5.16  | 99.4  |
| chr6 | 15484025 | 15485709 | 1685  | 0.01 | C_unshiu_00277 | 234486 | 232800 | 1687  | 0.61  | 98.58 |
| chr6 | 15486090 | 15488760 | 2671  | 0.02 | C_unshiu_00277 | 232170 | 229491 | 2680  | 0.96  | 99.03 |
| chr6 | 15489211 | 15521085 | 31875 | 0.18 | C_unshiu_00277 | 228395 | 196459 | 31937 | 11.48 | 99.28 |
| chr6 | 15521355 | 15534000 | 12646 | 0.07 | C_unshiu_00277 | 196087 | 183428 | 12660 | 4.55  | 98.87 |
| chr6 | 15534287 | 15540978 | 6692  | 0.04 | C_unshiu_00277 | 183336 | 176625 | 6712  | 2.41  | 99.39 |
| chr6 | 15543600 | 15555377 | 11778 | 0.07 | C_unshiu_00277 | 170795 | 159005 | 11791 | 4.24  | 98.6  |
| chr6 | 15544147 | 15560864 | 16718 | 0.09 | C_unshiu_00277 | 135861 | 152575 | 16715 | 6.01  | 98.69 |
| chr6 | 15567833 | 15584558 | 16726 | 0.09 | C_unshiu_00446 | 82393  | 99118  | 16726 | 8.01  | 99.59 |
| chr6 | 15586843 | 15588402 | 1560  | 0.01 | C_unshiu_00446 | 100016 | 101576 | 1561  | 0.75  | 99.62 |
| chr6 | 15588592 | 15604911 | 16320 | 0.09 | C_unshiu_00446 | 101747 | 118067 | 16321 | 7.81  | 98.99 |
| chr6 | 15617594 | 15643627 | 26034 | 0.15 | C_unshiu_00446 | 120511 | 146471 | 25961 | 12.43 | 98.82 |
| chr6 | 15644379 | 15647291 | 2913  | 0.02 | C_unshiu_00446 | 146775 | 149682 | 2908  | 1.39  | 98.36 |
| chr6 | 15647420 | 15660155 | 12736 | 0.07 | C_unshiu_00446 | 149675 | 162460 | 12786 | 6.12  | 98.85 |
| chr6 | 15663018 | 15667432 | 4415  | 0.02 | C_unshiu_00446 | 164403 | 168852 | 4450  | 2.13  | 98.72 |
| chr6 | 15670179 | 15675090 | 4912  | 0.03 | C_unshiu_00446 | 171706 | 176622 | 4917  | 2.35  | 99.67 |
| chr6 | 15684901 | 15710297 | 25397 | 0.14 | C_unshiu_01022 | 12     | 25482  | 25471 | 24.6  | 99.26 |
| chr6 | 15711091 | 15719035 | 7945  | 0.04 | C_unshiu_01022 | 25807  | 33741  | 7935  | 7.66  | 98.63 |
| chr6 | 15715392 | 15722355 | 6964  | 0.04 | C_unshiu_02957 | 1      | 6964   | 6964  | 49.08 | 99.6  |
| chr6 | 15726593 | 15735385 | 8793  | 0.05 | C_unshiu_01022 | 32149  | 40962  | 8814  | 8.51  | 99.22 |
| chr6 | 15736678 | 15737751 | 1074  | 0.01 | C_unshiu_01022 | 42654  | 43728  | 1075  | 1.04  | 99.91 |
| chr6 | 15740849 | 15745323 | 4475  | 0.03 | C_unshiu_01022 | 48972  | 53403  | 4432  | 4.28  | 98.37 |
| chr6 | 15745334 | 15750073 | 4740  | 0.03 | C_unshiu_01022 | 53802  | 58553  | 4752  | 4.59  | 99.33 |
| chr6 | 15750109 | 15765163 | 15055 | 0.09 | C_unshiu_01022 | 58551  | 73682  | 15132 | 14.61 | 98.86 |

|      |          |          |       |      |                |        |        |       |       |       |
|------|----------|----------|-------|------|----------------|--------|--------|-------|-------|-------|
| chr6 | 15765449 | 15768776 | 3328  | 0.02 | C_unshiu_01022 | 74237  | 77563  | 3327  | 3.21  | 98.41 |
| chr6 | 15781635 | 15782752 | 1118  | 0.01 | C_unshiu_00219 | 315804 | 314687 | 1118  | 0.35  | 100   |
| chr6 | 15782566 | 15785206 | 2641  | 0.01 | C_unshiu_00219 | 314664 | 312031 | 2634  | 0.83  | 98.11 |
| chr6 | 15785237 | 15805106 | 19870 | 0.11 | C_unshiu_00219 | 312113 | 292215 | 19899 | 6.29  | 99.52 |
| chr6 | 15805098 | 15809018 | 3921  | 0.02 | C_unshiu_00663 | 67129  | 63209  | 3921  | 2.56  | 100   |
| chr6 | 15818165 | 15820825 | 2661  | 0.02 | C_unshiu_00219 | 280850 | 278191 | 2660  | 0.84  | 99.96 |
| chr6 | 15831810 | 15851538 | 19729 | 0.11 | C_unshiu_00219 | 269066 | 249418 | 19649 | 6.21  | 98.16 |
| chr6 | 15853680 | 15862520 | 8841  | 0.05 | C_unshiu_00219 | 248109 | 239277 | 8833  | 2.79  | 98.95 |
| chr6 | 15862542 | 15886585 | 24044 | 0.14 | C_unshiu_00219 | 238715 | 214658 | 24058 | 7.6   | 99.19 |
| chr6 | 15890894 | 15894602 | 3709  | 0.02 | C_unshiu_00219 | 210321 | 206602 | 3720  | 1.18  | 99.3  |
| chr6 | 15895917 | 15916344 | 20428 | 0.12 | C_unshiu_00219 | 206056 | 185621 | 20436 | 6.46  | 98.76 |
| chr6 | 15916521 | 15930328 | 13808 | 0.08 | C_unshiu_00219 | 185385 | 171540 | 13846 | 4.38  | 99.28 |
| chr6 | 15930320 | 15937151 | 6832  | 0.04 | C_unshiu_00219 | 171337 | 164481 | 6857  | 2.17  | 99.17 |
| chr6 | 15944929 | 15949037 | 4109  | 0.02 | C_unshiu_00219 | 161601 | 157501 | 4101  | 1.3   | 98.5  |
| chr6 | 15950302 | 15960300 | 9999  | 0.06 | C_unshiu_00219 | 156442 | 146445 | 9998  | 3.16  | 98.67 |
| chr6 | 15959886 | 15964822 | 4937  | 0.03 | C_unshiu_00219 | 146035 | 141102 | 4934  | 1.56  | 99.43 |
| chr6 | 15965369 | 15981834 | 16466 | 0.09 | C_unshiu_00219 | 140030 | 123549 | 16482 | 5.21  | 99.55 |
| chr6 | 15982017 | 15996773 | 14757 | 0.08 | C_unshiu_00219 | 123564 | 108875 | 14690 | 4.64  | 99.09 |
| chr6 | 15997269 | 16020560 | 23292 | 0.13 | C_unshiu_00219 | 107884 | 84533  | 23352 | 7.38  | 99.38 |
| chr6 | 16020549 | 16024465 | 3917  | 0.02 | C_unshiu_00219 | 83368  | 79441  | 3928  | 1.24  | 98.45 |
| chr6 | 16045584 | 16071139 | 25556 | 0.14 | C_unshiu_01785 | 20958  | 46579  | 25622 | 52.18 | 98.44 |
| chr6 | 16074896 | 16088169 | 13274 | 0.08 | C_unshiu_00044 | 172904 | 159587 | 13318 | 2.09  | 98.85 |
| chr6 | 16090021 | 16119318 | 29298 | 0.17 | C_unshiu_00044 | 158136 | 128805 | 29332 | 4.6   | 99.2  |
| chr6 | 16119336 | 16130044 | 10709 | 0.06 | C_unshiu_00044 | 128127 | 117440 | 10688 | 1.68  | 99.32 |
| chr6 | 16131083 | 16151907 | 20825 | 0.12 | C_unshiu_00044 | 117808 | 96903  | 20906 | 3.28  | 99.02 |
| chr6 | 16154338 | 16157455 | 3118  | 0.02 | C_unshiu_00044 | 79371  | 76238  | 3134  | 0.49  | 98.56 |
| chr6 | 16159240 | 16161613 | 2374  | 0.01 | C_unshiu_00044 | 90198  | 87818  | 2381  | 0.37  | 98.15 |
| chr6 | 16162090 | 16174801 | 12712 | 0.07 | C_unshiu_02241 | 15594  | 28287  | 12694 | 39.66 | 99.14 |
| chr6 | 16179035 | 16183361 | 4327  | 0.02 | C_unshiu_00044 | 54354  | 50024  | 4331  | 0.68  | 98.08 |
| chr6 | 16183939 | 16205515 | 21577 | 0.12 | C_unshiu_00044 | 49995  | 28362  | 21634 | 3.39  | 98.7  |
| chr6 | 16205532 | 16210244 | 4713  | 0.03 | C_unshiu_02605 | 3231   | 7942   | 4712  | 21.48 | 99.17 |
| chr6 | 16207783 | 16222553 | 14771 | 0.08 | C_unshiu_00044 | 27363  | 12543  | 14821 | 2.32  | 98.13 |
| chr6 | 16224040 | 16247098 | 23059 | 0.13 | C_unshiu_00766 | 74929  | 97975  | 23047 | 17.26 | 99.8  |
| chr6 | 16251206 | 16255904 | 4699  | 0.03 | C_unshiu_00766 | 102055 | 106754 | 4700  | 3.52  | 98.49 |
| chr6 | 16256625 | 16261170 | 4546  | 0.03 | C_unshiu_00766 | 107914 | 112456 | 4543  | 3.4   | 99.65 |
| chr6 | 16271997 | 16274888 | 2892  | 0.02 | C_unshiu_00766 | 119023 | 121903 | 2881  | 2.16  | 99.27 |
| chr6 | 16276583 | 16279380 | 2798  | 0.02 | C_unshiu_00766 | 122164 | 124961 | 2798  | 2.1   | 100   |
| chr6 | 16279487 | 16281194 | 1708  | 0.01 | C_unshiu_00766 | 125261 | 126970 | 1710  | 1.28  | 99.3  |
| chr6 | 16281754 | 16291691 | 9938  | 0.06 | C_unshiu_00750 | 57802  | 67739  | 9938  | 7.28  | 99.96 |
| chr6 | 16293321 | 16294621 | 1301  | 0.01 | C_unshiu_00750 | 88643  | 89941  | 1299  | 0.95  | 98.77 |
| chr6 | 16299784 | 16302804 | 3021  | 0.02 | C_unshiu_00750 | 75994  | 78998  | 3005  | 2.2   | 98.35 |
| chr6 | 16304924 | 16306516 | 1593  | 0.01 | C_unshiu_00372 | 56398  | 57990  | 1593  | 0.69  | 100   |
| chr6 | 16306508 | 16308152 | 1645  | 0.01 | C_unshiu_01732 | 47175  | 45532  | 1644  | 3.2   | 98.6  |
| chr6 | 16308165 | 16310219 | 2055  | 0.01 | C_unshiu_01732 | 44970  | 42923  | 2048  | 3.98  | 98.54 |
| chr6 | 16310432 | 16328774 | 18343 | 0.1  | C_unshiu_01732 | 42837  | 24457  | 18381 | 35.74 | 99.22 |
| chr6 | 16346943 | 16351261 | 4319  | 0.02 | C_unshiu_01732 | 10269  | 5972   | 4298  | 8.36  | 98.21 |
| chr6 | 16351286 | 16357007 | 5722  | 0.03 | C_unshiu_01732 | 5722   | 1      | 5722  | 11.13 | 100   |
| chr6 | 16366230 | 16377831 | 11602 | 0.07 | C_unshiu_01123 | 71799  | 83455  | 11657 | 12.44 | 98.58 |
| chr6 | 16378400 | 16387238 | 8839  | 0.05 | C_unshiu_01123 | 84915  | 93740  | 8826  | 9.42  | 99.76 |
| chr6 | 16395445 | 16397279 | 1835  | 0.01 | C_unshiu_00876 | 30050  | 31890  | 1841  | 1.54  | 99.67 |
| chr6 | 16410686 | 16413199 | 2514  | 0.01 | C_unshiu_00876 | 43703  | 46208  | 2506  | 2.09  | 98.57 |
| chr6 | 16462989 | 16485227 | 22239 | 0.13 | C_unshiu_00876 | 96852  | 119079 | 22228 | 18.57 | 99.18 |
| chr6 | 16490448 | 16557662 | 67215 | 0.38 | C_unshiu_00202 | 164600 | 97383  | 67218 | 20.06 | 99.98 |
| chr6 | 16553902 | 16583527 | 29626 | 0.17 | C_unshiu_01079 | 2351   | 31964  | 29614 | 30.21 | 99.86 |
| chr6 | 16563541 | 16627375 | 63835 | 0.36 | C_unshiu_01079 | 11990  | 75793  | 63804 | 65.09 | 99.9  |
| chr6 | 16627392 | 16642945 | 15554 | 0.09 | C_unshiu_01079 | 76769  | 92324  | 15556 | 15.87 | 99.99 |
| chr6 | 16646065 | 16647098 | 1034  | 0.01 | C_unshiu_01079 | 93349  | 92315  | 1035  | 1.06  | 99.61 |
| chr6 | 16655859 | 16658949 | 3091  | 0.02 | C_unshiu_00351 | 240270 | 237180 | 3091  | 1.29  | 100   |
| chr6 | 16659280 | 16660693 | 1414  | 0.01 | C_unshiu_00351 | 236451 | 235038 | 1414  | 0.59  | 100   |
| chr6 | 16660726 | 16690167 | 29442 | 0.17 | C_unshiu_00351 | 235147 | 205909 | 29239 | 12.17 | 98.59 |
| chr6 | 16692463 | 16697483 | 5021  | 0.03 | C_unshiu_01530 | 56588  | 61608  | 5021  | 8.15  | 99.6  |
| chr6 | 16702972 | 16705130 | 2159  | 0.01 | C_unshiu_00085 | 429741 | 431889 | 2149  | 0.46  | 99.12 |
| chr6 | 16707961 | 16721281 | 13321 | 0.08 | C_unshiu_00085 | 433889 | 447210 | 13322 | 2.82  | 99.99 |
| chr6 | 16729302 | 16730526 | 1225  | 0.01 | C_unshiu_00085 | 456486 | 457710 | 1225  | 0.26  | 100   |
| chr6 | 16731190 | 16739031 | 7842  | 0.04 | C_unshiu_00085 | 458545 | 466412 | 7868  | 1.67  | 99.25 |
| chr6 | 16744515 | 16750099 | 5585  | 0.03 | C_unshiu_00980 | 27890  | 22285  | 5606  | 5.16  | 98.36 |
| chr6 | 16749805 | 16770507 | 20703 | 0.12 | C_unshiu_02660 | 20703  | 1      | 20703 | 100   | 99.94 |
| chr6 | 16782237 | 16783470 | 1234  | 0.01 | C_unshiu_00655 | 126130 | 124897 | 1234  | 0.8   | 99.76 |
| chr6 | 16785152 | 16794890 | 9739  | 0.06 | C_unshiu_00655 | 123979 | 114251 | 9729  | 6.29  | 99.2  |
| chr6 | 16794906 | 16802885 | 7980  | 0.05 | C_unshiu_00655 | 112607 | 104632 | 7976  | 5.15  | 99.92 |
| chr6 | 16810688 | 16812400 | 1713  | 0.01 | C_unshiu_00655 | 102634 | 100910 | 1725  | 1.11  | 98.27 |
| chr6 | 16812889 | 16820257 | 7369  | 0.04 | C_unshiu_00655 | 99876  | 92514  | 7363  | 4.76  | 99.35 |
| chr6 | 16822754 | 16831141 | 8388  | 0.05 | C_unshiu_00655 | 89225  | 80839  | 8387  | 5.42  | 99.67 |
| chr6 | 16831440 | 16833784 | 2345  | 0.01 | C_unshiu_02865 | 1098   | 3423   | 2326  | 14.1  | 98.72 |
| chr6 | 16833158 | 16835043 | 1886  | 0.01 | C_unshiu_00655 | 80143  | 78257  | 1887  | 1.22  | 98.62 |
| chr6 | 16837306 | 16838620 | 1315  | 0.01 | C_unshiu_00655 | 75196  | 73882  | 1315  | 0.85  | 100   |
| chr6 | 16839550 | 16859619 | 20070 | 0.11 | C_unshiu_00655 | 72528  | 52447  | 20082 | 12.97 | 99.57 |
| chr6 | 16860163 | 16863864 | 3702  | 0.02 | C_unshiu_00655 | 51535  | 47834  | 3702  | 2.39  | 100   |
| chr6 | 16872207 | 16873721 | 1515  | 0.01 | C_unshiu_01245 | 1      | 1501   | 1501  | 1.84  | 99.08 |

|      |          |          |       |      |                |        |        |       |       |       |
|------|----------|----------|-------|------|----------------|--------|--------|-------|-------|-------|
| chr6 | 16895265 | 16912915 | 17651 | 0.1  | C_unshiu_01219 | 1141   | 18791  | 17651 | 21.04 | 99.9  |
| chr6 | 16918472 | 16932800 | 14329 | 0.08 | C_unshiu_01219 | 24234  | 38566  | 14333 | 17.09 | 99.62 |
| chr6 | 16992006 | 17004790 | 12785 | 0.07 | C_unshiu_01301 | 19284  | 32068  | 12785 | 16.52 | 99.98 |
| chr6 | 17005325 | 17019145 | 13821 | 0.08 | C_unshiu_01301 | 32963  | 46780  | 13818 | 17.85 | 99.91 |
| chr6 | 17028040 | 17030388 | 2349  | 0.01 | C_unshiu_00856 | 17648  | 19989  | 2342  | 1.92  | 98.39 |
| chr6 | 17030395 | 17034287 | 3893  | 0.02 | C_unshiu_00856 | 20149  | 24045  | 3897  | 3.19  | 98.13 |
| chr6 | 17091455 | 17095532 | 4078  | 0.02 | C_unshiu_00454 | 124514 | 128587 | 4074  | 1.97  | 99.53 |
| chr6 | 17100694 | 17103297 | 2604  | 0.01 | C_unshiu_00454 | 136812 | 139392 | 2581  | 1.25  | 98.96 |
| chr6 | 17106806 | 17108116 | 1311  | 0.01 | C_unshiu_00454 | 139295 | 140607 | 1313  | 0.63  | 98.1  |
| chr6 | 17113408 | 17130620 | 17213 | 0.1  | C_unshiu_00454 | 147191 | 164395 | 17205 | 8.32  | 98.7  |
| chr6 | 17130926 | 17135171 | 4246  | 0.02 | C_unshiu_00454 | 165203 | 169444 | 4242  | 2.05  | 98.41 |
| chr6 | 17137662 | 17149221 | 11560 | 0.07 | C_unshiu_00454 | 175005 | 186628 | 11624 | 5.62  | 98.16 |
| chr6 | 17149902 | 17153688 | 3787  | 0.02 | C_unshiu_00454 | 187204 | 191007 | 3804  | 1.84  | 98    |
| chr6 | 17153696 | 17186242 | 32547 | 0.18 | C_unshiu_01249 | 38555  | 71198  | 32644 | 40.33 | 98.53 |
| chr6 | 17187043 | 17199055 | 12013 | 0.07 | C_unshiu_01247 | 2053   | 14033  | 11981 | 14.78 | 98.17 |
| chr6 | 17195909 | 17200787 | 4879  | 0.03 | C_unshiu_01104 | 1      | 4873   | 4873  | 5.09  | 98.67 |
| chr6 | 17199057 | 17234709 | 35653 | 0.2  | C_unshiu_01247 | 14217  | 49661  | 35445 | 43.73 | 98.41 |
| chr6 | 17235388 | 17238317 | 2930  | 0.02 | C_unshiu_01247 | 49995  | 52906  | 2912  | 3.59  | 98.43 |
| chr6 | 17244318 | 17245379 | 1062  | 0.01 | C_unshiu_01247 | 59578  | 60640  | 1063  | 1.31  | 99.15 |
| chr6 | 17249272 | 17251332 | 2061  | 0.01 | C_unshiu_01247 | 60639  | 62708  | 2070  | 2.55  | 98.26 |
| chr6 | 17251351 | 17269066 | 17716 | 0.1  | C_unshiu_01247 | 63321  | 81060  | 17740 | 21.89 | 99.49 |
| chr6 | 17297406 | 17306928 | 9523  | 0.05 | C_unshiu_00444 | 135559 | 126026 | 9534  | 4.56  | 99.27 |
| chr6 | 17312833 | 17314286 | 1454  | 0.01 | C_unshiu_00444 | 121272 | 119803 | 1470  | 0.7   | 98.44 |
| chr6 | 17314947 | 17316797 | 1851  | 0.01 | C_unshiu_00444 | 118763 | 116929 | 1835  | 0.88  | 98.81 |
| chr6 | 17317081 | 17325577 | 8497  | 0.05 | C_unshiu_00444 | 114093 | 105608 | 8486  | 4.06  | 99.06 |
| chr6 | 17329357 | 17359892 | 30536 | 0.17 | C_unshiu_00266 | 76361  | 106821 | 30461 | 10.71 | 99.68 |
| chr6 | 17361112 | 17378012 | 16901 | 0.1  | C_unshiu_00266 | 108374 | 125307 | 16934 | 5.95  | 98.73 |
| chr6 | 17380225 | 17402756 | 22532 | 0.13 | C_unshiu_00266 | 127890 | 150401 | 22512 | 7.91  | 99.71 |
| chr6 | 17402903 | 17404289 | 1387  | 0.01 | C_unshiu_00266 | 150689 | 152074 | 1386  | 0.49  | 99.93 |
| chr6 | 17438385 | 17446791 | 8407  | 0.05 | C_unshiu_02455 | 26032  | 17642  | 8391  | 32.22 | 99.68 |
| chr6 | 17447008 | 17452931 | 5924  | 0.03 | C_unshiu_00056 | 546333 | 540423 | 5911  | 1     | 98.82 |
| chr6 | 17457333 | 17458757 | 1425  | 0.01 | C_unshiu_00056 | 535574 | 534150 | 1425  | 0.24  | 100   |
| chr6 | 17460677 | 17482669 | 21993 | 0.12 | C_unshiu_00056 | 531452 | 509437 | 22016 | 3.71  | 99.05 |
| chr6 | 17483706 | 17486626 | 2921  | 0.02 | C_unshiu_00056 | 508184 | 505261 | 2924  | 0.49  | 98.22 |
| chr6 | 17490831 | 17510009 | 19179 | 0.11 | C_unshiu_00056 | 505245 | 486032 | 19214 | 3.24  | 99.55 |
| chr6 | 17528171 | 17537547 | 9377  | 0.05 | C_unshiu_00981 | 48164  | 38792  | 9373  | 8.62  | 99.13 |
| chr6 | 17542011 | 17545528 | 3518  | 0.02 | C_unshiu_02727 | 1423   | 4950   | 3528  | 18.25 | 98.47 |
| chr6 | 17543718 | 17547081 | 3364  | 0.02 | C_unshiu_00981 | 38796  | 35433  | 3364  | 3.1   | 99.08 |
| chr6 | 17547758 | 17561835 | 14078 | 0.08 | C_unshiu_00981 | 34317  | 20284  | 14034 | 12.91 | 99.1  |
| chr6 | 17561863 | 17566190 | 4328  | 0.02 | C_unshiu_02727 | 10367  | 14694  | 4328  | 22.39 | 99.88 |
| chr6 | 17570541 | 17571806 | 1266  | 0.01 | C_unshiu_02727 | 18068  | 19333  | 1266  | 6.55  | 98.03 |
| chr6 | 17589295 | 17593725 | 4431  | 0.03 | C_unshiu_00508 | 42460  | 38025  | 4436  | 2.35  | 98.9  |
| chr6 | 17594084 | 17616143 | 22060 | 0.12 | C_unshiu_00508 | 37402  | 15256  | 22147 | 11.72 | 98.69 |
| chr6 | 17633053 | 17638013 | 4961  | 0.03 | C_unshiu_01009 | 38015  | 42991  | 4977  | 4.74  | 98.57 |
| chr6 | 17644413 | 17650816 | 6404  | 0.04 | C_unshiu_00294 | 226561 | 220164 | 6398  | 2.38  | 99.42 |
| chr6 | 17657227 | 17658564 | 1338  | 0.01 | C_unshiu_01009 | 49771  | 51111  | 1341  | 1.28  | 99.7  |
| chr6 | 17663034 | 17664679 | 1646  | 0.01 | C_unshiu_01009 | 54288  | 55935  | 1648  | 1.57  | 99.76 |
| chr7 | 35047    | 40960    | 5914  | 0.02 | C_unshiu_00312 | 226402 | 220421 | 5982  | 2.3   | 98.21 |
| chr7 | 47820    | 57506    | 9687  | 0.04 | C_unshiu_00312 | 212488 | 202767 | 9722  | 3.74  | 98.65 |
| chr7 | 57519    | 60977    | 3459  | 0.01 | C_unshiu_00312 | 202379 | 198899 | 3481  | 1.34  | 98.22 |
| chr7 | 74674    | 75814    | 1141  | 0    | C_unshiu_00312 | 186289 | 185147 | 1143  | 0.44  | 98.6  |
| chr7 | 77618    | 86716    | 9099  | 0.04 | C_unshiu_00312 | 185141 | 176045 | 9097  | 3.5   | 99.7  |
| chr7 | 86642    | 94660    | 8019  | 0.03 | C_unshiu_00312 | 175982 | 167954 | 8029  | 3.09  | 99.05 |
| chr7 | 107385   | 116216   | 8832  | 0.04 | C_unshiu_00312 | 154592 | 145740 | 8853  | 3.41  | 99.15 |
| chr7 | 116597   | 122915   | 6319  | 0.03 | C_unshiu_00312 | 142775 | 136449 | 6327  | 2.43  | 98.02 |
| chr7 | 173143   | 179058   | 5916  | 0.02 | C_unshiu_00312 | 82372  | 76436  | 5937  | 2.28  | 98.45 |
| chr7 | 179053   | 186272   | 7220  | 0.03 | C_unshiu_00312 | 76329  | 69096  | 7234  | 2.78  | 98.51 |
| chr7 | 186915   | 191612   | 4698  | 0.02 | C_unshiu_00312 | 69085  | 64351  | 4735  | 1.82  | 98.02 |
| chr7 | 192260   | 207114   | 14855 | 0.06 | C_unshiu_00312 | 63417  | 48549  | 14869 | 5.72  | 99.29 |
| chr7 | 207674   | 239925   | 32252 | 0.14 | C_unshiu_00312 | 48689  | 16338  | 32352 | 12.45 | 98.26 |
| chr7 | 253730   | 255093   | 1364  | 0.01 | C_unshiu_00312 | 1364   | 1      | 1364  | 0.52  | 99.41 |
| chr7 | 253788   | 283125   | 29338 | 0.12 | C_unshiu_00706 | 8490   | 37838  | 29349 | 20.52 | 98.35 |
| chr7 | 294192   | 312397   | 18206 | 0.08 | C_unshiu_00706 | 50605  | 68847  | 18243 | 12.75 | 99    |
| chr7 | 312409   | 317061   | 4653  | 0.02 | C_unshiu_00706 | 69711  | 74400  | 4690  | 3.28  | 98.47 |
| chr7 | 328965   | 342658   | 13694 | 0.06 | C_unshiu_00706 | 86258  | 99966  | 13709 | 9.58  | 99.15 |
| chr7 | 342653   | 374154   | 31502 | 0.13 | C_unshiu_00706 | 101197 | 132671 | 31475 | 22.01 | 98.77 |
| chr7 | 385834   | 431399   | 45566 | 0.19 | C_unshiu_00691 | 145261 | 99734  | 45528 | 31.34 | 99.87 |
| chr7 | 454328   | 455609   | 1282  | 0.01 | C_unshiu_00450 | 181958 | 180664 | 1295  | 0.62  | 98.3  |
| chr7 | 459686   | 471750   | 12065 | 0.05 | C_unshiu_00664 | 44401  | 32418  | 11984 | 7.82  | 98.54 |
| chr7 | 471667   | 497250   | 25584 | 0.11 | C_unshiu_00664 | 32306  | 6743   | 25564 | 16.68 | 99.92 |
| chr7 | 500879   | 506521   | 5643  | 0.02 | C_unshiu_00073 | 99732  | 94071  | 5662  | 1.1   | 99.33 |
| chr7 | 507383   | 519671   | 12289 | 0.05 | C_unshiu_00073 | 93050  | 80763  | 12288 | 2.38  | 99.14 |
| chr7 | 529237   | 534005   | 4769  | 0.02 | C_unshiu_02420 | 4763   | 1      | 4763  | 17.72 | 98.95 |
| chr7 | 545092   | 553727   | 8636  | 0.04 | C_unshiu_00073 | 55058  | 46352  | 8707  | 1.69  | 98.52 |
| chr7 | 554064   | 557148   | 3085  | 0.01 | C_unshiu_00073 | 46230  | 43150  | 3081  | 0.6   | 98.06 |
| chr7 | 564046   | 565171   | 1126  | 0    | C_unshiu_00073 | 36155  | 35031  | 1125  | 0.22  | 98.23 |
| chr7 | 600052   | 602444   | 2393  | 0.01 | C_unshiu_00353 | 7307   | 9706   | 2400  | 1     | 99    |
| chr7 | 603309   | 625039   | 21731 | 0.09 | C_unshiu_00353 | 12167  | 33983  | 21817 | 9.13  | 98.57 |
| chr7 | 629633   | 652255   | 22623 | 0.1  | C_unshiu_00353 | 38219  | 60967  | 22749 | 9.52  | 98.16 |

|      |         |         |       |      |                |        |        |       |       |       |
|------|---------|---------|-------|------|----------------|--------|--------|-------|-------|-------|
| chr7 | 659073  | 665630  | 6558  | 0.03 | C_unshiu_00353 | 68703  | 75266  | 6564  | 2.75  | 99.13 |
| chr7 | 676514  | 690054  | 13541 | 0.06 | C_unshiu_00353 | 83987  | 97567  | 13581 | 5.68  | 98.46 |
| chr7 | 701348  | 705079  | 3732  | 0.02 | C_unshiu_00353 | 109068 | 112800 | 3733  | 1.56  | 98.9  |
| chr7 | 718330  | 723137  | 4808  | 0.02 | C_unshiu_00353 | 126834 | 131644 | 4811  | 2.01  | 99.52 |
| chr7 | 723553  | 727794  | 4242  | 0.02 | C_unshiu_00353 | 132173 | 136443 | 4271  | 1.79  | 98.62 |
| chr7 | 729518  | 752008  | 22491 | 0.09 | C_unshiu_00353 | 138364 | 160822 | 22459 | 9.4   | 98.61 |
| chr7 | 753691  | 755462  | 1772  | 0.01 | C_unshiu_00353 | 164231 | 166002 | 1772  | 0.74  | 99.94 |
| chr7 | 757057  | 759344  | 2288  | 0.01 | C_unshiu_00353 | 167994 | 170288 | 2295  | 0.96  | 98.91 |
| chr7 | 759573  | 769405  | 9833  | 0.04 | C_unshiu_00353 | 170523 | 180386 | 9864  | 4.13  | 99.19 |
| chr7 | 770220  | 773724  | 3505  | 0.01 | C_unshiu_00353 | 182125 | 185629 | 3505  | 1.47  | 99.91 |
| chr7 | 776584  | 781546  | 4963  | 0.02 | C_unshiu_00353 | 189779 | 194768 | 4990  | 2.09  | 98.02 |
| chr7 | 784308  | 785322  | 1015  | 0    | C_unshiu_00353 | 195710 | 196723 | 1014  | 0.42  | 99.51 |
| chr7 | 817523  | 820091  | 2569  | 0.01 | C_unshiu_00353 | 231530 | 234102 | 2573  | 1.08  | 98.84 |
| chr7 | 855015  | 866035  | 11021 | 0.05 | C_unshiu_01418 | 32324  | 43389  | 11066 | 15.9  | 98.71 |
| chr7 | 866777  | 879125  | 12349 | 0.05 | C_unshiu_01418 | 43387  | 55719  | 12333 | 17.72 | 98.39 |
| chr7 | 873289  | 890889  | 17601 | 0.07 | C_unshiu_01559 | 1      | 17627  | 17627 | 29.44 | 99.06 |
| chr7 | 909727  | 911666  | 1940  | 0.01 | C_unshiu_01559 | 39630  | 41571  | 1942  | 3.24  | 99.9  |
| chr7 | 911823  | 929575  | 17753 | 0.07 | C_unshiu_01559 | 42087  | 59884  | 17798 | 29.72 | 98.85 |
| chr7 | 919655  | 952917  | 33263 | 0.14 | C_unshiu_00488 | 6109   | 39386  | 33278 | 16.95 | 98.32 |
| chr7 | 965674  | 980222  | 14549 | 0.06 | C_unshiu_00488 | 40755  | 55285  | 14531 | 7.4   | 98.82 |
| chr7 | 1003579 | 1006102 | 2524  | 0.01 | C_unshiu_00488 | 79303  | 81831  | 2529  | 1.29  | 98.5  |
| chr7 | 1011210 | 1026698 | 15489 | 0.07 | C_unshiu_00488 | 88836  | 104324 | 15489 | 7.89  | 98.89 |
| chr7 | 1028277 | 1030538 | 2262  | 0.01 | C_unshiu_00488 | 105623 | 107884 | 2262  | 1.15  | 99.03 |
| chr7 | 1035673 | 1039612 | 3940  | 0.02 | C_unshiu_00488 | 112212 | 116160 | 3949  | 2.01  | 98.68 |
| chr7 | 1047146 | 1064368 | 17223 | 0.07 | C_unshiu_00488 | 125718 | 142993 | 17276 | 8.8   | 98.21 |
| chr7 | 1064356 | 1066025 | 1670  | 0.01 | C_unshiu_00488 | 143217 | 144885 | 1669  | 0.85  | 98.09 |
| chr7 | 1067470 | 1075589 | 8120  | 0.03 | C_unshiu_00488 | 146415 | 154519 | 8105  | 4.13  | 98.34 |
| chr7 | 1075706 | 1078127 | 2422  | 0.01 | C_unshiu_00488 | 154521 | 156945 | 2425  | 1.24  | 98.43 |
| chr7 | 1080502 | 1081796 | 1295  | 0.01 | C_unshiu_00488 | 160447 | 161744 | 1298  | 0.66  | 98.08 |
| chr7 | 1081796 | 1085148 | 3353  | 0.01 | C_unshiu_00488 | 161912 | 165261 | 3350  | 1.71  | 98.27 |
| chr7 | 1093489 | 1107637 | 14149 | 0.06 | C_unshiu_02749 | 14164  | 8      | 14157 | 74.29 | 99.84 |
| chr7 | 1113606 | 1116009 | 2404  | 0.01 | C_unshiu_01203 | 3278   | 5673   | 2396  | 2.81  | 98.38 |
| chr7 | 1127282 | 1129109 | 1828  | 0.01 | C_unshiu_00631 | 77819  | 79645  | 1827  | 1.14  | 98.75 |
| chr7 | 1129259 | 1130643 | 1385  | 0.01 | C_unshiu_00631 | 79994  | 81386  | 1393  | 0.87  | 98.21 |
| chr7 | 1147748 | 1151260 | 3513  | 0.01 | C_unshiu_02235 | 31116  | 27594  | 3523  | 10.97 | 99.57 |
| chr7 | 1151504 | 1153424 | 1921  | 0.01 | C_unshiu_02235 | 11913  | 9993   | 1921  | 5.98  | 99.64 |
| chr7 | 1154646 | 1156577 | 1932  | 0.01 | C_unshiu_02235 | 8502   | 6575   | 1928  | 6     | 99.59 |
| chr7 | 1156871 | 1159700 | 2830  | 0.01 | C_unshiu_02235 | 22479  | 19641  | 2839  | 8.84  | 98.56 |
| chr7 | 1159692 | 1160821 | 1130  | 0    | C_unshiu_02235 | 19499  | 18370  | 1130  | 3.52  | 99.38 |
| chr7 | 1161037 | 1166256 | 5220  | 0.02 | C_unshiu_02235 | 17525  | 12286  | 5240  | 16.32 | 98.19 |
| chr7 | 1168839 | 1183306 | 14468 | 0.06 | C_unshiu_02051 | 14432  | 12     | 14421 | 37.35 | 98.51 |
| chr7 | 1186015 | 1192468 | 6454  | 0.03 | C_unshiu_01937 | 13167  | 19592  | 6426  | 14.85 | 98.52 |
| chr7 | 1247070 | 1252905 | 5836  | 0.02 | C_unshiu_00292 | 119944 | 114104 | 5841  | 2.16  | 99.32 |
| chr7 | 1252921 | 1261589 | 8669  | 0.04 | C_unshiu_00292 | 113604 | 104936 | 8669  | 3.21  | 100   |
| chr7 | 1263659 | 1265445 | 1787  | 0.01 | C_unshiu_00292 | 102180 | 100394 | 1787  | 0.66  | 100   |
| chr7 | 1265896 | 1268156 | 2261  | 0.01 | C_unshiu_00292 | 99505  | 97245  | 2261  | 0.84  | 100   |
| chr7 | 1269275 | 1275820 | 6546  | 0.03 | C_unshiu_00292 | 151704 | 145152 | 6553  | 2.43  | 99.53 |
| chr7 | 1277132 | 1282246 | 5115  | 0.02 | C_unshiu_00292 | 143269 | 138155 | 5115  | 1.89  | 100   |
| chr7 | 1282493 | 1290686 | 8194  | 0.03 | C_unshiu_00292 | 137502 | 129322 | 8181  | 3.03  | 99    |
| chr7 | 1293529 | 1299661 | 6133  | 0.03 | C_unshiu_00292 | 126363 | 120230 | 6134  | 2.27  | 99.98 |
| chr7 | 1322350 | 1328502 | 6153  | 0.03 | C_unshiu_00218 | 292808 | 286653 | 6156  | 1.92  | 99.33 |
| chr7 | 1328534 | 1334397 | 5864  | 0.02 | C_unshiu_00209 | 30124  | 24266  | 5859  | 1.78  | 98.34 |
| chr7 | 1334818 | 1339067 | 4250  | 0.02 | C_unshiu_00218 | 280226 | 275976 | 4251  | 1.33  | 99.2  |
| chr7 | 1339070 | 1343344 | 4275  | 0.02 | C_unshiu_00209 | 19556  | 15277  | 4280  | 1.3   | 98.53 |
| chr7 | 1346642 | 1352794 | 6153  | 0.03 | C_unshiu_00218 | 267488 | 261324 | 6165  | 1.93  | 99.17 |
| chr7 | 1365631 | 1384396 | 18766 | 0.08 | C_unshiu_00218 | 247097 | 228305 | 18793 | 5.87  | 99.24 |
| chr7 | 1384502 | 1386223 | 1722  | 0.01 | C_unshiu_00218 | 228303 | 226576 | 1728  | 0.54  | 99.13 |
| chr7 | 1386216 | 1425110 | 38895 | 0.16 | C_unshiu_00218 | 225876 | 186776 | 39101 | 12.22 | 98.6  |
| chr7 | 1425104 | 1437538 | 12435 | 0.05 | C_unshiu_00218 | 176370 | 163918 | 12453 | 3.89  | 99.01 |
| chr7 | 1437876 | 1450217 | 12342 | 0.05 | C_unshiu_00218 | 163121 | 150786 | 12336 | 3.86  | 98.77 |
| chr7 | 1452543 | 1465057 | 12515 | 0.05 | C_unshiu_02929 | 14985  | 2461   | 12525 | 83.58 | 98.69 |
| chr7 | 1509835 | 1514167 | 4333  | 0.02 | C_unshiu_02692 | 1540   | 5872   | 4333  | 21.67 | 99.95 |
| chr7 | 1523897 | 1525533 | 1637  | 0.01 | C_unshiu_02692 | 17845  | 19479  | 1635  | 8.18  | 99.51 |
| chr7 | 1547433 | 1552950 | 5518  | 0.02 | C_unshiu_00218 | 56996  | 51454  | 5543  | 1.73  | 98.16 |
| chr7 | 1556119 | 1560233 | 4115  | 0.02 | C_unshiu_00218 | 47941  | 43812  | 4130  | 1.29  | 99.3  |
| chr7 | 1562558 | 1578346 | 15789 | 0.07 | C_unshiu_00218 | 41819  | 25989  | 15831 | 4.95  | 99.11 |
| chr7 | 1586598 | 1595838 | 9241  | 0.04 | C_unshiu_00218 | 19183  | 9937   | 9247  | 2.89  | 98.39 |
| chr7 | 1601784 | 1611299 | 9516  | 0.04 | C_unshiu_00218 | 9496   | 1      | 9496  | 2.97  | 99.58 |
| chr7 | 1609255 | 1621348 | 12094 | 0.05 | C_unshiu_00544 | 124175 | 112079 | 12097 | 6.74  | 98.97 |
| chr7 | 1626928 | 1647021 | 20094 | 0.08 | C_unshiu_00544 | 109020 | 88842  | 20179 | 11.25 | 98.84 |
| chr7 | 1648034 | 1676272 | 28239 | 0.12 | C_unshiu_00544 | 88757  | 60531  | 28227 | 15.73 | 99.57 |
| chr7 | 1681530 | 1699071 | 17542 | 0.07 | C_unshiu_00544 | 55788  | 38247  | 17542 | 9.78  | 100   |
| chr7 | 1701022 | 1716998 | 15977 | 0.07 | C_unshiu_00544 | 37611  | 21635  | 15977 | 8.91  | 99.98 |
| chr7 | 1724604 | 1726984 | 2381  | 0.01 | C_unshiu_00552 | 151309 | 153689 | 2381  | 1.33  | 100   |
| chr7 | 1728237 | 1729263 | 1027  | 0    | C_unshiu_01676 | 36347  | 35321  | 1027  | 1.91  | 100   |
| chr7 | 1744979 | 1756639 | 11661 | 0.05 | C_unshiu_01781 | 11661  | 1      | 11661 | 23.68 | 99.93 |
| chr7 | 1756220 | 1765513 | 9294  | 0.04 | C_unshiu_00254 | 17605  | 8274   | 9332  | 3.17  | 99.21 |
| chr7 | 1766438 | 1767654 | 1217  | 0.01 | C_unshiu_00254 | 6966   | 5744   | 1223  | 0.42  | 99.35 |
| chr7 | 1767713 | 1784942 | 17230 | 0.07 | C_unshiu_00126 | 384690 | 402004 | 17315 | 4.17  | 99.16 |

|      |         |         |       |      |                |        |        |       |       |       |
|------|---------|---------|-------|------|----------------|--------|--------|-------|-------|-------|
| chr7 | 1788571 | 1791410 | 2840  | 0.01 | C_unshiu_00126 | 404159 | 407000 | 2842  | 0.69  | 99.79 |
| chr7 | 1794889 | 1796323 | 1435  | 0.01 | C_unshiu_00051 | 583501 | 582066 | 1436  | 0.24  | 99.93 |
| chr7 | 1800999 | 1823143 | 22145 | 0.09 | C_unshiu_00051 | 574921 | 552754 | 22168 | 3.7   | 99.29 |
| chr7 | 1823142 | 1831289 | 8148  | 0.03 | C_unshiu_00051 | 552671 | 544491 | 8181  | 1.36  | 99.01 |
| chr7 | 1832126 | 1837558 | 5433  | 0.02 | C_unshiu_00051 | 544492 | 539061 | 5432  | 0.91  | 99.87 |
| chr7 | 1837543 | 1843244 | 5702  | 0.02 | C_unshiu_00051 | 537968 | 532262 | 5707  | 0.95  | 99.28 |
| chr7 | 1843350 | 1845930 | 2581  | 0.01 | C_unshiu_00051 | 531792 | 529202 | 2591  | 0.43  | 98.73 |
| chr7 | 1846696 | 1856279 | 9584  | 0.04 | C_unshiu_00051 | 527758 | 518145 | 9614  | 1.6   | 98.9  |
| chr7 | 1856294 | 1873712 | 17419 | 0.07 | C_unshiu_00051 | 517951 | 500526 | 17426 | 2.91  | 99.63 |
| chr7 | 1875784 | 1879133 | 3350  | 0.01 | C_unshiu_00051 | 499454 | 496100 | 3355  | 0.56  | 99.08 |
| chr7 | 1879133 | 1882921 | 3789  | 0.02 | C_unshiu_00051 | 496005 | 492196 | 3810  | 0.64  | 99.13 |
| chr7 | 1883279 | 1921876 | 38598 | 0.16 | C_unshiu_00051 | 490392 | 451786 | 38607 | 6.44  | 99.33 |
| chr7 | 1921869 | 1930890 | 9022  | 0.04 | C_unshiu_00051 | 450942 | 441901 | 9042  | 1.51  | 99.57 |
| chr7 | 1931281 | 1935988 | 4708  | 0.02 | C_unshiu_00051 | 441904 | 437195 | 4710  | 0.79  | 99.3  |
| chr7 | 1935985 | 1943906 | 7922  | 0.03 | C_unshiu_00051 | 437239 | 429249 | 7991  | 1.33  | 98.72 |
| chr7 | 1947230 | 1949933 | 2704  | 0.01 | C_unshiu_00051 | 428048 | 425327 | 2722  | 0.45  | 98.71 |
| chr7 | 1949916 | 1975864 | 25949 | 0.11 | C_unshiu_00051 | 425224 | 399233 | 25992 | 4.33  | 99.34 |
| chr7 | 1979204 | 2000894 | 21691 | 0.09 | C_unshiu_00051 | 397590 | 375910 | 21681 | 3.62  | 99.54 |
| chr7 | 2001993 | 2003275 | 1283  | 0.01 | C_unshiu_00051 | 374436 | 373153 | 1284  | 0.21  | 99.69 |
| chr7 | 2005805 | 2008197 | 2393  | 0.01 | C_unshiu_00051 | 371518 | 369119 | 2400  | 0.4   | 98.5  |
| chr7 | 2021453 | 2054354 | 32902 | 0.14 | C_unshiu_00051 | 355001 | 322154 | 32848 | 5.48  | 99.68 |
| chr7 | 2056537 | 2068758 | 12222 | 0.05 | C_unshiu_00051 | 320813 | 308528 | 12286 | 2.05  | 98.9  |
| chr7 | 2068777 | 2086545 | 17769 | 0.07 | C_unshiu_00051 | 308121 | 290356 | 17766 | 2.96  | 99.11 |
| chr7 | 2086658 | 2088630 | 1973  | 0.01 | C_unshiu_00051 | 287611 | 285623 | 1989  | 0.33  | 98.69 |
| chr7 | 2088629 | 2093643 | 5015  | 0.02 | C_unshiu_00051 | 285052 | 280045 | 5008  | 0.84  | 99.4  |
| chr7 | 2104201 | 2168128 | 63928 | 0.27 | C_unshiu_00051 | 271311 | 207238 | 64074 | 10.69 | 99.62 |
| chr7 | 2167494 | 2171878 | 4385  | 0.02 | C_unshiu_00051 | 202450 | 198066 | 4385  | 0.73  | 99.75 |
| chr7 | 2178915 | 2181555 | 2641  | 0.01 | C_unshiu_00051 | 191209 | 188569 | 2641  | 0.44  | 99.51 |
| chr7 | 2182229 | 2185422 | 3194  | 0.01 | C_unshiu_00051 | 187640 | 184460 | 3181  | 0.53  | 98.47 |
| chr7 | 2186835 | 2189601 | 2767  | 0.01 | C_unshiu_00051 | 184429 | 181663 | 2767  | 0.46  | 99.75 |
| chr7 | 2198902 | 2212466 | 13565 | 0.06 | C_unshiu_00051 | 181725 | 168156 | 13570 | 2.26  | 99.36 |
| chr7 | 2224105 | 2226076 | 1972  | 0.01 | C_unshiu_00209 | 61025  | 62996  | 1972  | 0.6   | 98.78 |
| chr7 | 2227701 | 2230224 | 2524  | 0.01 | C_unshiu_00209 | 63037  | 65560  | 2524  | 0.77  | 99.56 |
| chr7 | 2288482 | 2298150 | 9669  | 0.04 | C_unshiu_00209 | 115628 | 125379 | 9752  | 2.96  | 98.63 |
| chr7 | 2303828 | 2306088 | 2261  | 0.01 | C_unshiu_00209 | 131967 | 134240 | 2274  | 0.69  | 99.21 |
| chr7 | 2306108 | 2314055 | 7948  | 0.03 | C_unshiu_00209 | 134222 | 142153 | 7932  | 2.41  | 98.43 |
| chr7 | 2314713 | 2334335 | 19623 | 0.08 | C_unshiu_00209 | 142950 | 162706 | 19757 | 5.99  | 98.3  |
| chr7 | 2350345 | 2368367 | 18023 | 0.08 | C_unshiu_00209 | 175619 | 193692 | 18074 | 5.48  | 98.26 |
| chr7 | 2381483 | 2394163 | 12681 | 0.05 | C_unshiu_00209 | 206866 | 219573 | 12708 | 3.85  | 98.58 |
| chr7 | 2403132 | 2418272 | 15141 | 0.06 | C_unshiu_00209 | 229521 | 244656 | 15136 | 4.59  | 98.17 |
| chr7 | 2421240 | 2423223 | 1984  | 0.01 | C_unshiu_00209 | 248191 | 250174 | 1984  | 0.6   | 99.6  |
| chr7 | 2422599 | 2424810 | 2212  | 0.01 | C_unshiu_01334 | 1      | 2212   | 2212  | 2.95  | 99.32 |
| chr7 | 2424810 | 2428236 | 3427  | 0.01 | C_unshiu_02267 | 6990   | 3563   | 3428  | 11.08 | 99.56 |
| chr7 | 2472157 | 2476718 | 4562  | 0.02 | C_unshiu_00289 | 1      | 4559   | 4559  | 1.68  | 99.74 |
| chr7 | 2477580 | 2479417 | 1838  | 0.01 | C_unshiu_00289 | 5707   | 7549   | 1843  | 0.68  | 99.51 |
| chr7 | 2480406 | 2483869 | 3464  | 0.01 | C_unshiu_00289 | 7542   | 11011  | 3470  | 1.28  | 98.96 |
| chr7 | 2499563 | 2508874 | 9312  | 0.04 | C_unshiu_00289 | 26427  | 35728  | 9302  | 3.43  | 99.45 |
| chr7 | 2509018 | 2512211 | 3194  | 0.01 | C_unshiu_00289 | 35725  | 38933  | 3209  | 1.18  | 98.13 |
| chr7 | 2536758 | 2542047 | 5290  | 0.02 | C_unshiu_00289 | 65520  | 70847  | 5328  | 1.97  | 98.35 |
| chr7 | 2543836 | 2552203 | 8368  | 0.04 | C_unshiu_00289 | 71272  | 79689  | 8418  | 3.11  | 98.91 |
| chr7 | 2554605 | 2558836 | 4232  | 0.02 | C_unshiu_00289 | 81961  | 86184  | 4224  | 1.56  | 98.3  |
| chr7 | 2560130 | 2573086 | 12957 | 0.05 | C_unshiu_00289 | 87979  | 100940 | 12962 | 4.78  | 98.91 |
| chr7 | 2604264 | 2607882 | 3619  | 0.02 | C_unshiu_00289 | 132567 | 136208 | 3642  | 1.34  | 98.33 |
| chr7 | 2609188 | 2610245 | 1058  | 0    | C_unshiu_00079 | 46752  | 47809  | 1058  | 0.21  | 100   |
| chr7 | 2610240 | 2617540 | 7301  | 0.03 | C_unshiu_00289 | 137787 | 145132 | 7346  | 2.71  | 98.65 |
| chr7 | 2618191 | 2626203 | 8013  | 0.03 | C_unshiu_00289 | 145749 | 153765 | 8017  | 2.96  | 99    |
| chr7 | 2631031 | 2641048 | 10018 | 0.04 | C_unshiu_00289 | 159716 | 169744 | 10029 | 3.7   | 98.09 |
| chr7 | 2655170 | 2660505 | 5336  | 0.02 | C_unshiu_00289 | 184054 | 189405 | 5352  | 1.97  | 98.14 |
| chr7 | 2667213 | 2702103 | 34891 | 0.15 | C_unshiu_00289 | 195677 | 230805 | 35129 | 12.96 | 98.38 |
| chr7 | 2726010 | 2741028 | 15019 | 0.06 | C_unshiu_00289 | 254704 | 269789 | 15086 | 5.57  | 98.74 |
| chr7 | 2738268 | 2741147 | 2880  | 0.01 | C_unshiu_02295 | 10468  | 13338  | 2871  | 9.57  | 98.89 |
| chr7 | 2741678 | 2752015 | 10338 | 0.04 | C_unshiu_02295 | 14508  | 24898  | 10391 | 34.63 | 98.44 |
| chr7 | 2750875 | 2771559 | 20685 | 0.09 | C_unshiu_00025 | 1      | 20786  | 20786 | 2.75  | 98.07 |
| chr7 | 2772092 | 2774732 | 2641  | 0.01 | C_unshiu_00025 | 21723  | 24368  | 2646  | 0.35  | 98.79 |
| chr7 | 2776582 | 2778801 | 2220  | 0.01 | C_unshiu_00025 | 24813  | 27034  | 2222  | 0.29  | 98.74 |
| chr7 | 2779415 | 2789300 | 9886  | 0.04 | C_unshiu_00025 | 32346  | 42258  | 9913  | 1.31  | 98.7  |
| chr7 | 2805271 | 2824846 | 19576 | 0.08 | C_unshiu_00025 | 60571  | 80203  | 19633 | 2.6   | 98.73 |
| chr7 | 2862718 | 2864286 | 1569  | 0.01 | C_unshiu_00025 | 116820 | 118375 | 1556  | 0.21  | 98.16 |
| chr7 | 2874542 | 2875921 | 1380  | 0.01 | C_unshiu_00025 | 127867 | 129243 | 1377  | 0.18  | 98.26 |
| chr7 | 2877006 | 2879115 | 2110  | 0.01 | C_unshiu_00025 | 127122 | 129233 | 2112  | 0.28  | 99.76 |
| chr7 | 2881289 | 2907498 | 26210 | 0.11 | C_unshiu_00025 | 133931 | 160098 | 26168 | 3.47  | 98.16 |
| chr7 | 2912829 | 2947824 | 34996 | 0.15 | C_unshiu_00025 | 161191 | 196288 | 35098 | 4.65  | 98.31 |
| chr7 | 2953192 | 2955682 | 2491  | 0.01 | C_unshiu_00025 | 202381 | 204872 | 2492  | 0.33  | 99.96 |
| chr7 | 2980596 | 2984905 | 4310  | 0.02 | C_unshiu_00025 | 237599 | 241896 | 4298  | 0.57  | 98.72 |
| chr7 | 2984912 | 2998985 | 14074 | 0.06 | C_unshiu_00025 | 242021 | 256159 | 14139 | 1.87  | 99.2  |
| chr7 | 2999903 | 3013622 | 13720 | 0.06 | C_unshiu_00025 | 257883 | 271681 | 13799 | 1.83  | 98.06 |
| chr7 | 3020603 | 3029152 | 8550  | 0.04 | C_unshiu_00025 | 275384 | 283994 | 8611  | 1.14  | 98.5  |
| chr7 | 3029134 | 3030237 | 1104  | 0    | C_unshiu_00025 | 284017 | 285126 | 1110  | 0.15  | 99.46 |
| chr7 | 3047772 | 3051685 | 3914  | 0.02 | C_unshiu_00025 | 303034 | 306954 | 3921  | 0.52  | 98.04 |

|      |         |         |       |      |                |        |        |       |       |       |
|------|---------|---------|-------|------|----------------|--------|--------|-------|-------|-------|
| chr7 | 3052219 | 3053831 | 1613  | 0.01 | C_unshiu_00025 | 307620 | 309238 | 1619  | 0.21  | 98.15 |
| chr7 | 3054134 | 3061383 | 7250  | 0.03 | C_unshiu_00025 | 309303 | 316579 | 7277  | 0.96  | 98.92 |
| chr7 | 3065926 | 3073517 | 7592  | 0.03 | C_unshiu_00025 | 321103 | 328684 | 7582  | 1     | 99.15 |
| chr7 | 3085014 | 3111782 | 26769 | 0.11 | C_unshiu_00025 | 340061 | 366780 | 26720 | 3.54  | 98.05 |
| chr7 | 3116110 | 3118284 | 2175  | 0.01 | C_unshiu_00025 | 371754 | 373943 | 2190  | 0.29  | 98.36 |
| chr7 | 3118855 | 3128284 | 9430  | 0.04 | C_unshiu_00025 | 374854 | 384323 | 9470  | 1.25  | 98.63 |
| chr7 | 3128405 | 3130357 | 1953  | 0.01 | C_unshiu_00025 | 384476 | 386434 | 1959  | 0.26  | 99.39 |
| chr7 | 3134629 | 3137063 | 2435  | 0.01 | C_unshiu_00025 | 390270 | 392713 | 2444  | 0.32  | 98.24 |
| chr7 | 3138019 | 3144633 | 6615  | 0.03 | C_unshiu_00025 | 394308 | 400956 | 6649  | 0.88  | 98.13 |
| chr7 | 3144853 | 3154030 | 9178  | 0.04 | C_unshiu_00025 | 400989 | 410187 | 9199  | 1.22  | 98.97 |
| chr7 | 3158325 | 3180414 | 22090 | 0.09 | C_unshiu_00025 | 410179 | 432291 | 22113 | 2.93  | 98.22 |
| chr7 | 3180412 | 3183053 | 2642  | 0.01 | C_unshiu_00025 | 431927 | 434555 | 2629  | 0.35  | 99.36 |
| chr7 | 3187808 | 3191022 | 3215  | 0.01 | C_unshiu_02417 | 22069  | 18851  | 3219  | 11.95 | 99.88 |
| chr7 | 3194192 | 3203687 | 9496  | 0.04 | C_unshiu_00025 | 439339 | 448827 | 9489  | 1.26  | 99.2  |
| chr7 | 3216663 | 3222886 | 6224  | 0.03 | C_unshiu_00025 | 462622 | 468863 | 6242  | 0.83  | 98.48 |
| chr7 | 3222920 | 3226305 | 3386  | 0.01 | C_unshiu_00025 | 469031 | 472416 | 3386  | 0.45  | 99    |
| chr7 | 3229181 | 3235900 | 6720  | 0.03 | C_unshiu_00025 | 472890 | 479634 | 6745  | 0.89  | 98.65 |
| chr7 | 3235935 | 3246896 | 10962 | 0.05 | C_unshiu_00025 | 479829 | 490822 | 10994 | 1.46  | 98.75 |
| chr7 | 3266917 | 3275736 | 8820  | 0.04 | C_unshiu_00025 | 516015 | 524870 | 8856  | 1.17  | 98.21 |
| chr7 | 3275736 | 3283136 | 7401  | 0.03 | C_unshiu_00025 | 524957 | 532386 | 7430  | 0.98  | 98.65 |
| chr7 | 3283128 | 3288606 | 5479  | 0.02 | C_unshiu_00025 | 532727 | 538218 | 5492  | 0.73  | 98.38 |
| chr7 | 3290310 | 3296323 | 6014  | 0.03 | C_unshiu_00025 | 539122 | 545153 | 6032  | 0.8   | 98.3  |
| chr7 | 3296512 | 3301087 | 4576  | 0.02 | C_unshiu_00025 | 546157 | 550739 | 4583  | 0.61  | 99.02 |
| chr7 | 3350737 | 3353621 | 2885  | 0.01 | C_unshiu_00025 | 597204 | 600083 | 2880  | 0.38  | 99.17 |
| chr7 | 3359758 | 3369783 | 10026 | 0.04 | C_unshiu_00025 | 605473 | 615528 | 10056 | 1.33  | 98.76 |
| chr7 | 3370701 | 3399114 | 28414 | 0.12 | C_unshiu_00025 | 616881 | 645394 | 28514 | 3.78  | 98.68 |
| chr7 | 3400847 | 3404227 | 3381  | 0.01 | C_unshiu_00025 | 648095 | 651505 | 3411  | 0.45  | 98.68 |
| chr7 | 3404673 | 3406544 | 1872  | 0.01 | C_unshiu_00025 | 652163 | 654043 | 1881  | 0.25  | 98.57 |
| chr7 | 3440896 | 3442335 | 1440  | 0.01 | C_unshiu_02661 | 4209   | 2792   | 1418  | 6.85  | 98.19 |
| chr7 | 3443849 | 3445675 | 1827  | 0.01 | C_unshiu_00051 | 162600 | 160774 | 1827  | 0.3   | 100   |
| chr7 | 3445667 | 3447468 | 1802  | 0.01 | C_unshiu_02661 | 13905  | 15707  | 1803  | 8.72  | 99.78 |
| chr7 | 3452296 | 3461311 | 9016  | 0.04 | C_unshiu_02316 | 27915  | 18900  | 9016  | 30.66 | 99.76 |
| chr7 | 3457394 | 3462591 | 5198  | 0.02 | C_unshiu_00249 | 223000 | 217804 | 5197  | 1.76  | 98.33 |
| chr7 | 3480497 | 3482946 | 2450  | 0.01 | C_unshiu_00651 | 140181 | 142630 | 2450  | 1.58  | 100   |
| chr7 | 3484863 | 3494708 | 9846  | 0.04 | C_unshiu_00748 | 126956 | 117110 | 9847  | 7.21  | 99.35 |
| chr7 | 3505229 | 3523170 | 17942 | 0.08 | C_unshiu_01956 | 17909  | 10     | 17900 | 42.15 | 99.2  |
| chr7 | 3525885 | 3527642 | 1758  | 0.01 | C_unshiu_00748 | 95898  | 94143  | 1756  | 1.29  | 98.41 |
| chr7 | 3528416 | 3531110 | 2695  | 0.01 | C_unshiu_00748 | 93942  | 91248  | 2695  | 1.97  | 99.37 |
| chr7 | 3531109 | 3536230 | 5122  | 0.02 | C_unshiu_00748 | 91193  | 86052  | 5142  | 3.77  | 98.56 |
| chr7 | 3542509 | 3546452 | 3944  | 0.02 | C_unshiu_00748 | 80346  | 76386  | 3961  | 2.9   | 98.99 |
| chr7 | 3553034 | 3559514 | 6481  | 0.03 | C_unshiu_02941 | 11499  | 5022   | 6478  | 44.04 | 98.1  |
| chr7 | 3556453 | 3571852 | 15400 | 0.06 | C_unshiu_00748 | 67679  | 52282  | 15398 | 11.28 | 99.33 |
| chr7 | 3572997 | 3575157 | 2161  | 0.01 | C_unshiu_00748 | 52259  | 50109  | 2151  | 1.58  | 98.8  |
| chr7 | 3575152 | 3576863 | 1712  | 0.01 | C_unshiu_00748 | 49242  | 47536  | 1707  | 1.25  | 98.31 |
| chr7 | 3584302 | 3585825 | 1524  | 0.01 | C_unshiu_00748 | 39407  | 37882  | 1526  | 1.12  | 99.8  |
| chr7 | 3587579 | 3592280 | 4702  | 0.02 | C_unshiu_03040 | 6084   | 1384   | 4701  | 39.8  | 99.04 |
| chr7 | 3590334 | 3592326 | 1993  | 0.01 | C_unshiu_00313 | 258860 | 256868 | 1993  | 0.77  | 99.25 |
| chr7 | 3592562 | 3594093 | 1532  | 0.01 | C_unshiu_00748 | 31962  | 30431  | 1532  | 1.12  | 100   |
| chr7 | 3594340 | 3596522 | 2183  | 0.01 | C_unshiu_00313 | 254478 | 252296 | 2183  | 0.84  | 99.45 |
| chr7 | 3596523 | 3598864 | 2342  | 0.01 | C_unshiu_00178 | 130526 | 132867 | 2342  | 0.65  | 99.74 |
| chr7 | 3599792 | 3602729 | 2938  | 0.01 | C_unshiu_00748 | 26140  | 23203  | 2938  | 2.15  | 100   |
| chr7 | 3604007 | 3618075 | 14069 | 0.06 | C_unshiu_00748 | 23215  | 9142   | 14074 | 10.31 | 99.6  |
| chr7 | 3618346 | 3623955 | 5610  | 0.02 | C_unshiu_00748 | 8462   | 2855   | 5608  | 4.11  | 99.89 |
| chr7 | 3623980 | 3626554 | 2575  | 0.01 | C_unshiu_00748 | 2564   | 1      | 2564  | 1.88  | 99.57 |
| chr7 | 3638842 | 3642555 | 3714  | 0.02 | C_unshiu_01367 | 11719  | 15432  | 3714  | 5.07  | 100   |
| chr7 | 3643315 | 3664205 | 20891 | 0.09 | C_unshiu_01367 | 16639  | 37529  | 20891 | 28.53 | 100   |
| chr7 | 3664228 | 3678805 | 14578 | 0.06 | C_unshiu_01367 | 38120  | 52702  | 14583 | 19.92 | 99.84 |
| chr7 | 3677981 | 3686149 | 8169  | 0.03 | C_unshiu_00313 | 235591 | 227415 | 8177  | 3.16  | 99.6  |
| chr7 | 3700138 | 3701867 | 1730  | 0.01 | C_unshiu_00313 | 206734 | 205005 | 1730  | 0.67  | 100   |
| chr7 | 3715929 | 3717675 | 1747  | 0.01 | C_unshiu_00591 | 16232  | 14486  | 1747  | 1.03  | 98.91 |
| chr7 | 3750231 | 3766588 | 16358 | 0.07 | C_unshiu_00313 | 159007 | 142541 | 16467 | 6.36  | 98.28 |
| chr7 | 3766987 | 3787130 | 20144 | 0.08 | C_unshiu_00313 | 141596 | 121416 | 20181 | 7.8   | 98.85 |
| chr7 | 3788248 | 3790111 | 1864  | 0.01 | C_unshiu_00313 | 120321 | 118477 | 1845  | 0.71  | 98.61 |
| chr7 | 3790075 | 3810300 | 20226 | 0.09 | C_unshiu_00313 | 118617 | 98324  | 20294 | 7.84  | 98.69 |
| chr7 | 3807862 | 3811998 | 4137  | 0.02 | C_unshiu_01123 | 45390  | 49527  | 4138  | 4.41  | 99.35 |
| chr7 | 3820725 | 3824349 | 3625  | 0.02 | C_unshiu_00548 | 175239 | 178850 | 3612  | 2.02  | 99.59 |
| chr7 | 3824345 | 3843676 | 19332 | 0.08 | C_unshiu_00548 | 172828 | 153486 | 19343 | 10.82 | 99.69 |
| chr7 | 3854654 | 3878872 | 24219 | 0.1  | C_unshiu_00548 | 141416 | 117112 | 24305 | 13.59 | 99.28 |
| chr7 | 3880918 | 3898460 | 17543 | 0.07 | C_unshiu_00548 | 117117 | 99467  | 17651 | 9.87  | 98.9  |
| chr7 | 3899356 | 3912077 | 12722 | 0.05 | C_unshiu_00548 | 98315  | 85670  | 12646 | 7.07  | 98    |
| chr7 | 3914302 | 3916970 | 2669  | 0.01 | C_unshiu_00141 | 388437 | 385769 | 2669  | 0.66  | 98.16 |
| chr7 | 3940631 | 4005727 | 65097 | 0.27 | C_unshiu_00148 | 207749 | 272785 | 65037 | 16.79 | 99.67 |
| chr7 | 4008921 | 4012845 | 3925  | 0.02 | C_unshiu_00148 | 273629 | 277532 | 3904  | 1.01  | 98.23 |
| chr7 | 4012866 | 4027687 | 14822 | 0.06 | C_unshiu_00148 | 278250 | 293098 | 14849 | 3.83  | 99.77 |
| chr7 | 4028561 | 4059792 | 31232 | 0.13 | C_unshiu_00148 | 293125 | 324381 | 31257 | 8.07  | 99.53 |
| chr7 | 4068010 | 4109293 | 41284 | 0.17 | C_unshiu_00148 | 331898 | 373171 | 41274 | 10.66 | 99.84 |
| chr7 | 4109785 | 4113339 | 3555  | 0.01 | C_unshiu_00148 | 373454 | 376988 | 3535  | 0.91  | 98.01 |
| chr7 | 4129695 | 4150494 | 20800 | 0.09 | C_unshiu_01381 | 71509  | 50787  | 20723 | 28.98 | 99.18 |
| chr7 | 4150649 | 4197333 | 46685 | 0.2  | C_unshiu_01381 | 50417  | 3746   | 46672 | 65.27 | 99.89 |

|      |         |         |       |      |                |        |        |       |       |       |
|------|---------|---------|-------|------|----------------|--------|--------|-------|-------|-------|
| chr7 | 4198903 | 4200472 | 1570  | 0.01 | C_unshiu_01336 | 26303  | 24734  | 1570  | 2.1   | 100   |
| chr7 | 4200467 | 4205477 | 5011  | 0.02 | C_unshiu_00387 | 216957 | 211954 | 5004  | 2.21  | 99.56 |
| chr7 | 4205467 | 4209751 | 4285  | 0.02 | C_unshiu_00940 | 32003  | 36287  | 4285  | 3.81  | 100   |
| chr7 | 4209752 | 4215141 | 5390  | 0.02 | C_unshiu_01450 | 40822  | 35422  | 5401  | 8.12  | 99.15 |
| chr7 | 4218098 | 4220219 | 2122  | 0.01 | C_unshiu_00387 | 202023 | 199916 | 2108  | 0.93  | 98.82 |
| chr7 | 4220746 | 4226390 | 5645  | 0.02 | C_unshiu_00387 | 199157 | 193513 | 5645  | 2.5   | 99.95 |
| chr7 | 4226396 | 4255168 | 28773 | 0.12 | C_unshiu_01450 | 29782  | 973    | 28810 | 43.29 | 98.53 |
| chr7 | 4255197 | 4267104 | 11908 | 0.05 | C_unshiu_00387 | 180191 | 168240 | 11952 | 5.29  | 98.21 |
| chr7 | 4270685 | 4277845 | 7161  | 0.03 | C_unshiu_00527 | 7170   | 1      | 7170  | 3.89  | 99.23 |
| chr7 | 4292599 | 4304904 | 12306 | 0.05 | C_unshiu_01513 | 1      | 12267  | 12267 | 19.64 | 99.16 |
| chr7 | 4305679 | 4314107 | 8429  | 0.04 | C_unshiu_00387 | 145772 | 137396 | 8377  | 3.7   | 98.34 |
| chr7 | 4316970 | 4321106 | 4137  | 0.02 | C_unshiu_02797 | 13778  | 17912  | 4135  | 23.06 | 98.13 |
| chr7 | 4317207 | 4322097 | 4891  | 0.02 | C_unshiu_00387 | 136457 | 131559 | 4899  | 2.17  | 99.84 |
| chr7 | 4329981 | 4331497 | 1517  | 0.01 | C_unshiu_00387 | 124331 | 122815 | 1517  | 0.67  | 98.95 |
| chr7 | 4334011 | 4336095 | 2085  | 0.01 | C_unshiu_00387 | 119648 | 117558 | 2091  | 0.92  | 98.52 |
| chr7 | 4334446 | 4344218 | 9773  | 0.04 | C_unshiu_01690 | 1      | 9773   | 9773  | 18.46 | 99.91 |
| chr7 | 4347939 | 4352094 | 4156  | 0.02 | C_unshiu_02797 | 1      | 4109   | 4109  | 22.92 | 98.46 |
| chr7 | 4356309 | 4358742 | 2434  | 0.01 | C_unshiu_02797 | 7421   | 9854   | 2434  | 13.58 | 99.92 |
| chr7 | 4362485 | 4364072 | 1588  | 0.01 | C_unshiu_00025 | 681195 | 682781 | 1587  | 0.21  | 99.94 |
| chr7 | 4364064 | 4366563 | 2500  | 0.01 | C_unshiu_01094 | 35185  | 37684  | 2500  | 2.59  | 100   |
| chr7 | 4393068 | 4400801 | 7734  | 0.03 | C_unshiu_01066 | 43470  | 51195  | 7726  | 7.82  | 98.33 |
| chr7 | 4400915 | 4403966 | 3052  | 0.01 | C_unshiu_01032 | 91298  | 94353  | 3056  | 2.97  | 99.8  |
| chr7 | 4404171 | 4406982 | 2812  | 0.01 | C_unshiu_01032 | 94727  | 97538  | 2812  | 2.73  | 99.61 |
| chr7 | 4406986 | 4410908 | 3923  | 0.02 | C_unshiu_01066 | 58027  | 61952  | 3926  | 3.97  | 99.29 |
| chr7 | 4410925 | 4442160 | 31236 | 0.13 | C_unshiu_01066 | 62143  | 93386  | 31244 | 31.61 | 98.79 |
| chr7 | 4451188 | 4454925 | 3738  | 0.02 | C_unshiu_01032 | 39494  | 35766  | 3729  | 3.62  | 99.25 |
| chr7 | 4474511 | 4478951 | 4441  | 0.02 | C_unshiu_01032 | 14602  | 10165  | 4438  | 4.31  | 99.53 |
| chr7 | 4482096 | 4487512 | 5417  | 0.02 | C_unshiu_00084 | 438740 | 433321 | 5420  | 1.15  | 99.45 |
| chr7 | 4487512 | 4492294 | 4783  | 0.02 | C_unshiu_00040 | 63186  | 67975  | 4790  | 0.73  | 98.81 |
| chr7 | 4487513 | 4492294 | 4782  | 0.02 | C_unshiu_00124 | 371596 | 376389 | 4794  | 1.14  | 98.42 |
| chr7 | 4493356 | 4495256 | 1901  | 0.01 | C_unshiu_00084 | 433326 | 431405 | 1922  | 0.41  | 98.23 |
| chr7 | 4536294 | 4546182 | 9889  | 0.04 | C_unshiu_00084 | 395010 | 385144 | 9867  | 2.09  | 98.71 |
| chr7 | 4546646 | 4553268 | 6623  | 0.03 | C_unshiu_00084 | 384402 | 377779 | 6624  | 1.4   | 98.08 |
| chr7 | 4569554 | 4578589 | 9036  | 0.04 | C_unshiu_00084 | 357842 | 348740 | 9103  | 1.93  | 98.6  |
| chr7 | 4593658 | 4596171 | 2514  | 0.01 | C_unshiu_00084 | 339646 | 337152 | 2495  | 0.53  | 98.49 |
| chr7 | 4596237 | 4597787 | 1551  | 0.01 | C_unshiu_00084 | 336661 | 335090 | 1572  | 0.33  | 98.09 |
| chr7 | 4603925 | 4608678 | 4754  | 0.02 | C_unshiu_00084 | 330767 | 326009 | 4759  | 1.01  | 99.35 |
| chr7 | 4623790 | 4653290 | 29501 | 0.12 | C_unshiu_00084 | 307012 | 277497 | 29516 | 6.25  | 98.11 |
| chr7 | 4664679 | 4669117 | 4439  | 0.02 | C_unshiu_00084 | 264691 | 260198 | 4494  | 0.95  | 98.31 |
| chr7 | 4672008 | 4675619 | 3612  | 0.02 | C_unshiu_00084 | 258644 | 255000 | 3645  | 0.77  | 98.6  |
| chr7 | 4687767 | 4689417 | 1651  | 0.01 | C_unshiu_00084 | 241942 | 240291 | 1652  | 0.35  | 99.21 |
| chr7 | 4692517 | 4693727 | 1211  | 0.01 | C_unshiu_00313 | 61151  | 62361  | 1211  | 0.47  | 100   |
| chr7 | 4693720 | 4698504 | 4785  | 0.02 | C_unshiu_00084 | 236166 | 231355 | 4812  | 1.02  | 98.67 |
| chr7 | 4700094 | 4710057 | 9964  | 0.04 | C_unshiu_00084 | 231363 | 221384 | 9980  | 2.11  | 98.58 |
| chr7 | 4764436 | 4768089 | 3654  | 0.02 | C_unshiu_00084 | 163936 | 160293 | 3644  | 0.77  | 98.72 |
| chr7 | 4768086 | 4786225 | 18140 | 0.08 | C_unshiu_00084 | 159889 | 141661 | 18229 | 3.86  | 98.79 |
| chr7 | 4786492 | 4791815 | 5324  | 0.02 | C_unshiu_00084 | 141664 | 136305 | 5360  | 1.13  | 98.03 |
| chr7 | 4791830 | 4809171 | 17342 | 0.07 | C_unshiu_00084 | 135545 | 118144 | 17402 | 3.68  | 98.42 |
| chr7 | 4823251 | 4828162 | 4912  | 0.02 | C_unshiu_00051 | 96836  | 91938  | 4899  | 0.82  | 99.04 |
| chr7 | 4835860 | 4849762 | 13903 | 0.06 | C_unshiu_00051 | 84046  | 70182  | 13865 | 2.31  | 98.6  |
| chr7 | 4849802 | 4861033 | 11232 | 0.05 | C_unshiu_00051 | 68238  | 56989  | 11250 | 1.88  | 98.75 |
| chr7 | 4864890 | 4892971 | 28082 | 0.12 | C_unshiu_00051 | 53615  | 25371  | 28245 | 4.71  | 98.59 |
| chr7 | 4893094 | 4897692 | 4599  | 0.02 | C_unshiu_00051 | 25216  | 20603  | 4614  | 0.77  | 98.35 |
| chr7 | 4910397 | 4911904 | 1508  | 0.01 | C_unshiu_00301 | 233120 | 231611 | 1510  | 0.57  | 98.41 |
| chr7 | 4913618 | 4916194 | 2577  | 0.01 | C_unshiu_02365 | 27977  | 25401  | 2577  | 9.21  | 100   |
| chr7 | 4916572 | 4923447 | 6876  | 0.03 | C_unshiu_02365 | 24721  | 17846  | 6876  | 24.58 | 99.99 |
| chr7 | 4925528 | 4953877 | 28350 | 0.12 | C_unshiu_00207 | 112137 | 83740  | 28398 | 8.59  | 98.61 |
| chr7 | 4967220 | 4977275 | 10056 | 0.04 | C_unshiu_00207 | 69775  | 59689  | 10087 | 3.05  | 98.77 |
| chr7 | 4977426 | 4984794 | 7369  | 0.03 | C_unshiu_00207 | 59689  | 52325  | 7365  | 2.23  | 98.52 |
| chr7 | 4986772 | 4990767 | 3996  | 0.02 | C_unshiu_00207 | 51656  | 47602  | 4055  | 1.23  | 98.03 |
| chr7 | 4993703 | 5000895 | 7193  | 0.03 | C_unshiu_00207 | 45869  | 38700  | 7170  | 2.17  | 99.33 |
| chr7 | 5001341 | 5028983 | 27643 | 0.12 | C_unshiu_00207 | 38085  | 10520  | 27566 | 8.34  | 98.61 |
| chr7 | 5021163 | 5044612 | 23450 | 0.1  | C_unshiu_00149 | 42944  | 66362  | 23419 | 6.05  | 99.46 |
| chr7 | 5049156 | 5060987 | 11832 | 0.05 | C_unshiu_00149 | 66237  | 78106  | 11870 | 3.07  | 98.24 |
| chr7 | 5060849 | 5067233 | 6385  | 0.03 | C_unshiu_00149 | 78107  | 84528  | 6422  | 1.66  | 98.35 |
| chr7 | 5104416 | 5106231 | 1816  | 0.01 | C_unshiu_00936 | 25923  | 27738  | 1816  | 1.61  | 99.89 |
| chr7 | 5108733 | 5110061 | 1329  | 0.01 | C_unshiu_00661 | 17127  | 15799  | 1329  | 0.87  | 100   |
| chr7 | 5119872 | 5122255 | 2384  | 0.01 | C_unshiu_00936 | 32898  | 35264  | 2367  | 2.09  | 98.58 |
| chr7 | 5128093 | 5130677 | 2585  | 0.01 | C_unshiu_00936 | 36404  | 38982  | 2579  | 2.28  | 98.07 |
| chr7 | 5131674 | 5133255 | 1582  | 0.01 | C_unshiu_01021 | 39578  | 37997  | 1582  | 1.52  | 100   |
| chr7 | 5133261 | 5146410 | 13150 | 0.06 | C_unshiu_00936 | 37923  | 51064  | 13142 | 11.62 | 99.58 |
| chr7 | 5151895 | 5158627 | 6733  | 0.03 | C_unshiu_00936 | 51534  | 58219  | 6686  | 5.91  | 98.47 |
| chr7 | 5159354 | 5160960 | 1607  | 0.01 | C_unshiu_00936 | 59413  | 61019  | 1607  | 1.42  | 99.25 |
| chr7 | 5180708 | 5182874 | 2167  | 0.01 | C_unshiu_00936 | 69637  | 71808  | 2172  | 1.92  | 98.94 |
| chr7 | 5186888 | 5188310 | 1423  | 0.01 | C_unshiu_00936 | 75036  | 76448  | 1413  | 1.25  | 98.04 |
| chr7 | 5195366 | 5197003 | 1638  | 0.01 | C_unshiu_01015 | 13800  | 15436  | 1637  | 1.57  | 99.88 |
| chr7 | 5222308 | 5227469 | 5162  | 0.02 | C_unshiu_02504 | 14463  | 9296   | 5168  | 21.08 | 99.25 |
| chr7 | 5227465 | 5228581 | 1117  | 0    | C_unshiu_00083 | 40471  | 41587  | 1117  | 0.24  | 100   |
| chr7 | 5235970 | 5237234 | 1265  | 0.01 | C_unshiu_02181 | 33975  | 32714  | 1262  | 3.71  | 98.81 |

|      |         |         |       |      |                |        |        |       |       |       |
|------|---------|---------|-------|------|----------------|--------|--------|-------|-------|-------|
| chr7 | 5240929 | 5242293 | 1365  | 0.01 | C_unshiu_02562 | 9544   | 10908  | 1365  | 5.92  | 99.93 |
| chr7 | 5242408 | 5263642 | 21235 | 0.09 | C_unshiu_02181 | 27406  | 6177   | 21230 | 62.49 | 99.31 |
| chr7 | 5266759 | 5268060 | 1302  | 0.01 | C_unshiu_02977 | 1      | 1311   | 1311  | 9.66  | 98.32 |
| chr7 | 5307087 | 5320833 | 13747 | 0.06 | C_unshiu_00028 | 163256 | 149518 | 13739 | 1.91  | 99.39 |
| chr7 | 5321857 | 5324616 | 2760  | 0.01 | C_unshiu_00028 | 147812 | 145062 | 2751  | 0.38  | 98.19 |
| chr7 | 5329463 | 5330881 | 1419  | 0.01 | C_unshiu_00028 | 140994 | 139576 | 1419  | 0.2   | 99.93 |
| chr7 | 5330985 | 5335170 | 4186  | 0.02 | C_unshiu_00028 | 139421 | 135240 | 4182  | 0.58  | 99.88 |
| chr7 | 5339394 | 5355370 | 15977 | 0.07 | C_unshiu_00028 | 130776 | 114697 | 16080 | 2.24  | 98.28 |
| chr7 | 5355419 | 5357346 | 1928  | 0.01 | C_unshiu_00028 | 114364 | 112433 | 1932  | 0.27  | 99.28 |
| chr7 | 5361766 | 5370406 | 8641  | 0.04 | C_unshiu_00028 | 108822 | 100187 | 8636  | 1.2   | 99.9  |
| chr7 | 5370400 | 5371929 | 1530  | 0.01 | C_unshiu_00598 | 141952 | 140423 | 1530  | 0.91  | 100   |
| chr7 | 5371930 | 5373751 | 1822  | 0.01 | C_unshiu_00028 | 98297  | 96476  | 1822  | 0.25  | 100   |
| chr7 | 5378873 | 5384678 | 5806  | 0.02 | C_unshiu_00028 | 96766  | 90963  | 5804  | 0.81  | 98.9  |
| chr7 | 5384808 | 5387232 | 2425  | 0.01 | C_unshiu_01324 | 30298  | 32722  | 2425  | 3.22  | 100   |
| chr7 | 5387248 | 5394422 | 7175  | 0.03 | C_unshiu_00028 | 89050  | 81880  | 7171  | 1     | 99.32 |
| chr7 | 5442865 | 5452019 | 9155  | 0.04 | C_unshiu_00806 | 99122  | 89970  | 9153  | 7.17  | 99.98 |
| chr7 | 5462750 | 5464889 | 2140  | 0.01 | C_unshiu_01179 | 32130  | 29991  | 2140  | 2.44  | 100   |
| chr7 | 5465008 | 5467261 | 2254  | 0.01 | C_unshiu_00806 | 82674  | 80421  | 2254  | 1.76  | 98.76 |
| chr7 | 5466301 | 5474553 | 8253  | 0.03 | C_unshiu_00806 | 81261  | 73008  | 8254  | 6.46  | 99.14 |
| chr7 | 5476008 | 5512304 | 36297 | 0.15 | C_unshiu_00236 | 129818 | 93520  | 36299 | 11.91 | 99.99 |
| chr7 | 5514742 | 5556636 | 41895 | 0.18 | C_unshiu_00076 | 53860  | 12044  | 41817 | 8.22  | 99.59 |
| chr7 | 5536633 | 5568671 | 32039 | 0.13 | C_unshiu_00076 | 32044  | 1      | 32044 | 6.3   | 99.89 |
| chr7 | 5563118 | 5657459 | 94342 | 0.4  | C_unshiu_00306 | 261810 | 167446 | 94365 | 36.04 | 99.97 |
| chr7 | 5657566 | 5691170 | 33605 | 0.14 | C_unshiu_00306 | 167057 | 133431 | 33627 | 12.84 | 99.93 |
| chr7 | 5671209 | 5752773 | 81565 | 0.34 | C_unshiu_00306 | 153412 | 71889  | 81524 | 31.14 | 99.81 |
| chr7 | 5732775 | 5785077 | 52303 | 0.22 | C_unshiu_00306 | 91875  | 39649  | 52227 | 19.95 | 99.73 |
| chr7 | 5789348 | 5798459 | 9112  | 0.04 | C_unshiu_00306 | 35903  | 26792  | 9112  | 3.48  | 100   |
| chr7 | 5798441 | 5821904 | 23464 | 0.1  | C_unshiu_00306 | 26710  | 3247   | 23464 | 8.96  | 99.9  |
| chr7 | 5827280 | 5864706 | 37427 | 0.16 | C_unshiu_00203 | 2041   | 39444  | 37404 | 11.21 | 99.93 |
| chr7 | 5865977 | 5868291 | 2315  | 0.01 | C_unshiu_00397 | 135416 | 137729 | 2314  | 1.04  | 98.83 |
| chr7 | 5868706 | 5888959 | 20254 | 0.09 | C_unshiu_00068 | 67545  | 87803  | 20259 | 3.83  | 99.97 |
| chr7 | 5889412 | 5942127 | 52716 | 0.22 | C_unshiu_00068 | 88883  | 141606 | 52724 | 9.98  | 99.93 |
| chr7 | 5946920 | 5986543 | 39624 | 0.17 | C_unshiu_00068 | 146329 | 185965 | 39637 | 7.5   | 99.91 |
| chr7 | 5989950 | 6024692 | 34743 | 0.15 | C_unshiu_00068 | 188747 | 223473 | 34727 | 6.57  | 99.91 |
| chr7 | 6024764 | 6031689 | 6926  | 0.03 | C_unshiu_00068 | 223643 | 230515 | 6873  | 1.3   | 98.59 |
| chr7 | 6032939 | 6090629 | 57691 | 0.24 | C_unshiu_00068 | 231621 | 289311 | 57691 | 10.92 | 100   |
| chr7 | 6094837 | 6096102 | 1266  | 0.01 | C_unshiu_00068 | 292607 | 293871 | 1265  | 0.24  | 99.61 |
| chr7 | 6096244 | 6101216 | 4973  | 0.02 | C_unshiu_00068 | 294259 | 299231 | 4973  | 0.94  | 99.66 |
| chr7 | 6101195 | 6148914 | 47720 | 0.2  | C_unshiu_00068 | 299293 | 347018 | 47726 | 9.03  | 99.99 |
| chr7 | 6148971 | 6192407 | 43437 | 0.18 | C_unshiu_00068 | 346906 | 390333 | 43428 | 8.22  | 99.91 |
| chr7 | 6192429 | 6266739 | 74311 | 0.31 | C_unshiu_00068 | 390800 | 465124 | 74325 | 14.07 | 99.9  |
| chr7 | 6266670 | 6329895 | 63226 | 0.27 | C_unshiu_00068 | 465099 | 528325 | 63227 | 11.97 | 99.94 |
| chr7 | 6321942 | 6380154 | 58213 | 0.25 | C_unshiu_00837 | 124046 | 65831  | 58216 | 46.93 | 99.96 |
| chr7 | 6380142 | 6393999 | 13858 | 0.06 | C_unshiu_00837 | 65784  | 51928  | 13857 | 11.17 | 99.99 |
| chr7 | 6395737 | 6397497 | 1761  | 0.01 | C_unshiu_00315 | 113680 | 115440 | 1761  | 0.68  | 99.6  |
| chr7 | 6427812 | 6450207 | 22396 | 0.09 | C_unshiu_00207 | 330459 | 308072 | 22388 | 6.77  | 99.82 |
| chr7 | 6450944 | 6453294 | 2351  | 0.01 | C_unshiu_00207 | 306826 | 304467 | 2360  | 0.71  | 99.03 |
| chr7 | 6454590 | 6456010 | 1421  | 0.01 | C_unshiu_01246 | 11552  | 10131  | 1422  | 1.75  | 99.37 |
| chr7 | 6460245 | 6461338 | 1094  | 0    | C_unshiu_00207 | 294768 | 293677 | 1092  | 0.33  | 99.18 |
| chr7 | 6469536 | 6477655 | 8120  | 0.03 | C_unshiu_00207 | 285901 | 277781 | 8121  | 2.46  | 98.89 |
| chr7 | 6478101 | 6482396 | 4296  | 0.02 | C_unshiu_00207 | 262080 | 257810 | 4271  | 1.29  | 98.72 |
| chr7 | 6499959 | 6502388 | 2430  | 0.01 | C_unshiu_00266 | 275431 | 273002 | 2430  | 0.85  | 100   |
| chr7 | 6503082 | 6504675 | 1594  | 0.01 | C_unshiu_00207 | 234335 | 232742 | 1594  | 0.48  | 100   |
| chr7 | 6507662 | 6515545 | 7884  | 0.03 | C_unshiu_00207 | 229421 | 221515 | 7907  | 2.39  | 98.93 |
| chr7 | 6523239 | 6526195 | 2957  | 0.01 | C_unshiu_00207 | 211431 | 208479 | 2953  | 0.89  | 98.88 |
| chr7 | 6526977 | 6531490 | 4514  | 0.02 | C_unshiu_00207 | 206558 | 202046 | 4513  | 1.37  | 99.22 |
| chr7 | 6532180 | 6533876 | 1697  | 0.01 | C_unshiu_02842 | 4875   | 6570   | 1696  | 10.11 | 99.29 |
| chr7 | 6553593 | 6571509 | 17917 | 0.08 | C_unshiu_00207 | 179369 | 161391 | 17979 | 5.44  | 98.25 |
| chr7 | 6583839 | 6585132 | 1294  | 0.01 | C_unshiu_00207 | 146948 | 145651 | 1298  | 0.39  | 98.85 |
| chr7 | 6586549 | 6605534 | 18986 | 0.08 | C_unshiu_00207 | 141299 | 122267 | 19033 | 5.76  | 98.38 |
| chr7 | 6605039 | 6606584 | 1546  | 0.01 | C_unshiu_00207 | 121720 | 120174 | 1547  | 0.47  | 99.94 |
| chr7 | 6607400 | 6616195 | 8796  | 0.04 | C_unshiu_00301 | 231469 | 222674 | 8796  | 3.31  | 100   |
| chr7 | 6616913 | 6619755 | 2843  | 0.01 | C_unshiu_02365 | 17551  | 14710  | 2842  | 10.16 | 99.02 |
| chr7 | 6619751 | 6628143 | 8393  | 0.04 | C_unshiu_02365 | 14081  | 5674   | 8408  | 30.05 | 98.51 |
| chr7 | 6624732 | 6635882 | 11151 | 0.05 | C_unshiu_00301 | 214757 | 203545 | 11213 | 4.22  | 98.11 |
| chr7 | 6636481 | 6639461 | 2981  | 0.01 | C_unshiu_00301 | 202723 | 199751 | 2973  | 1.12  | 98.43 |
| chr7 | 6663009 | 6669184 | 6176  | 0.03 | C_unshiu_00301 | 176405 | 170188 | 6218  | 2.34  | 98.36 |
| chr7 | 6731677 | 6746732 | 15056 | 0.06 | C_unshiu_00301 | 106666 | 91660  | 15007 | 5.65  | 98.76 |
| chr7 | 6746730 | 6748212 | 1483  | 0.01 | C_unshiu_00301 | 91622  | 90140  | 1483  | 0.56  | 99.6  |
| chr7 | 6758408 | 6763675 | 5268  | 0.02 | C_unshiu_00301 | 80514  | 75207  | 5308  | 2     | 98.7  |
| chr7 | 6764032 | 6775052 | 11021 | 0.05 | C_unshiu_00301 | 73654  | 62620  | 11035 | 4.15  | 98.24 |
| chr7 | 6776809 | 6783960 | 7152  | 0.03 | C_unshiu_00301 | 59531  | 52356  | 7176  | 2.7   | 98.47 |
| chr7 | 6793286 | 6820684 | 27399 | 0.12 | C_unshiu_00301 | 42521  | 14916  | 27606 | 10.39 | 98.49 |
| chr7 | 6820679 | 6822699 | 2021  | 0.01 | C_unshiu_00301 | 14754  | 12720  | 2035  | 0.77  | 98.72 |
| chr7 | 6829702 | 6832058 | 2357  | 0.01 | C_unshiu_00301 | 7250   | 4883   | 2368  | 0.89  | 98.82 |
| chr7 | 6832432 | 6836563 | 4132  | 0.02 | C_unshiu_00301 | 4898   | 733    | 4166  | 1.57  | 98.35 |
| chr7 | 6837389 | 6859994 | 22606 | 0.1  | C_unshiu_00169 | 313161 | 290517 | 22645 | 6.15  | 98.64 |
| chr7 | 6861690 | 6875742 | 14053 | 0.06 | C_unshiu_00169 | 289861 | 275799 | 14063 | 3.82  | 98.26 |
| chr7 | 6881295 | 6885467 | 4173  | 0.02 | C_unshiu_00169 | 269686 | 265512 | 4175  | 1.13  | 99.19 |

|      |         |         |       |      |                |        |        |       |       |       |
|------|---------|---------|-------|------|----------------|--------|--------|-------|-------|-------|
| chr7 | 6897998 | 6938116 | 40119 | 0.17 | C_unshiu_00169 | 253384 | 213374 | 40011 | 10.87 | 98.37 |
| chr7 | 6938201 | 6939769 | 1569  | 0.01 | C_unshiu_01507 | 46854  | 45286  | 1569  | 2.5   | 100   |
| chr7 | 6952581 | 6960186 | 7606  | 0.03 | C_unshiu_00169 | 199660 | 192040 | 7621  | 2.07  | 99.03 |
| chr7 | 6960344 | 6972382 | 12039 | 0.05 | C_unshiu_00169 | 191931 | 179841 | 12091 | 3.29  | 98.51 |
| chr7 | 6972363 | 6975058 | 2696  | 0.01 | C_unshiu_00169 | 179626 | 176925 | 2702  | 0.73  | 99    |
| chr7 | 6985163 | 6998380 | 13218 | 0.06 | C_unshiu_00169 | 167068 | 153815 | 13254 | 3.6   | 98.85 |
| chr7 | 7011301 | 7016274 | 4974  | 0.02 | C_unshiu_00169 | 140747 | 135841 | 4907  | 1.33  | 98.15 |
| chr7 | 7017353 | 7022243 | 4891  | 0.02 | C_unshiu_00169 | 135483 | 130565 | 4919  | 1.34  | 98.78 |
| chr7 | 7058763 | 7077927 | 19165 | 0.08 | C_unshiu_00861 | 15882  | 35006  | 19125 | 15.74 | 98.26 |
| chr7 | 7095995 | 7097040 | 1046  | 0    | C_unshiu_00861 | 59323  | 60367  | 1045  | 0.86  | 98.38 |
| chr7 | 7100557 | 7101662 | 1106  | 0    | C_unshiu_00861 | 60397  | 61500  | 1104  | 0.91  | 98.28 |
| chr7 | 7106685 | 7108246 | 1562  | 0.01 | C_unshiu_00861 | 68646  | 70211  | 1566  | 1.29  | 98.66 |
| chr7 | 7111863 | 7114351 | 2489  | 0.01 | C_unshiu_00861 | 73366  | 75870  | 2505  | 2.06  | 98.48 |
| chr7 | 7114341 | 7139986 | 25646 | 0.11 | C_unshiu_00861 | 76195  | 101938 | 25744 | 21.19 | 98.14 |
| chr7 | 7131306 | 7149035 | 17730 | 0.07 | C_unshiu_00801 | 128247 | 110461 | 17787 | 13.87 | 98.4  |
| chr7 | 7148955 | 7167906 | 18952 | 0.08 | C_unshiu_00801 | 110459 | 91439  | 19021 | 14.83 | 98.93 |
| chr7 | 7218209 | 7220174 | 1966  | 0.01 | C_unshiu_00801 | 42371  | 40402  | 1970  | 1.54  | 99.24 |
| chr7 | 7220136 | 7229812 | 9677  | 0.04 | C_unshiu_00801 | 40403  | 30671  | 9733  | 7.59  | 98.52 |
| chr7 | 7229811 | 7230991 | 1181  | 0    | C_unshiu_00244 | 122608 | 121428 | 1181  | 0.39  | 100   |
| chr7 | 7230989 | 7254407 | 23419 | 0.1  | C_unshiu_00801 | 30552  | 7023   | 23530 | 18.34 | 98.35 |
| chr7 | 7254683 | 7257604 | 2922  | 0.01 | C_unshiu_00801 | 6697   | 3776   | 2922  | 2.28  | 100   |
| chr7 | 7258881 | 7260793 | 1913  | 0.01 | C_unshiu_00801 | 1913   | 1      | 1913  | 1.49  | 100   |
| chr7 | 7261051 | 7340130 | 79080 | 0.33 | C_unshiu_01160 | 84487  | 5434   | 79054 | 87.96 | 99.69 |
| chr7 | 7343240 | 7344505 | 1266  | 0.01 | C_unshiu_02075 | 32663  | 33928  | 1266  | 3.37  | 100   |
| chr7 | 7344805 | 7347236 | 2432  | 0.01 | C_unshiu_02075 | 34234  | 36662  | 2429  | 6.47  | 99.38 |
| chr7 | 7348282 | 7349778 | 1497  | 0.01 | C_unshiu_00052 | 96350  | 94865  | 1486  | 0.25  | 98.8  |
| chr7 | 7352357 | 7436788 | 84432 | 0.36 | C_unshiu_00052 | 91573  | 7086   | 84488 | 14.13 | 99.89 |
| chr7 | 7436813 | 7439650 | 2838  | 0.01 | C_unshiu_00052 | 7195   | 4358   | 2838  | 0.47  | 99.96 |
| chr7 | 7451924 | 7542969 | 91046 | 0.38 | C_unshiu_00049 | 24062  | 115080 | 91019 | 14.73 | 99.94 |
| chr7 | 7542973 | 7544380 | 1408  | 0.01 | C_unshiu_00049 | 120072 | 118670 | 1403  | 0.23  | 98.87 |
| chr7 | 7548400 | 7562651 | 14252 | 0.06 | C_unshiu_00049 | 120070 | 134321 | 14252 | 2.31  | 100   |
| chr7 | 7566895 | 7570242 | 3348  | 0.01 | C_unshiu_00049 | 138092 | 141439 | 3348  | 0.54  | 100   |
| chr7 | 7570600 | 7574665 | 4066  | 0.02 | C_unshiu_01007 | 34447  | 30382  | 4066  | 3.87  | 100   |
| chr7 | 7575809 | 7576868 | 1060  | 0    | C_unshiu_00707 | 102015 | 100954 | 1062  | 0.74  | 99.34 |
| chr7 | 7580191 | 7600595 | 20405 | 0.09 | C_unshiu_00707 | 97721  | 77308  | 20414 | 14.29 | 98.99 |
| chr7 | 7606216 | 7607974 | 1759  | 0.01 | C_unshiu_00707 | 69765  | 68004  | 1762  | 1.23  | 99.77 |
| chr7 | 7611780 | 7613741 | 1962  | 0.01 | C_unshiu_00707 | 63879  | 61935  | 1945  | 1.36  | 99.13 |
| chr7 | 7613750 | 7649122 | 35373 | 0.15 | C_unshiu_00510 | 9499   | 45002  | 35504 | 18.86 | 98.57 |
| chr7 | 7663699 | 7673415 | 9717  | 0.04 | C_unshiu_00510 | 60244  | 70057  | 9814  | 5.21  | 98.01 |
| chr7 | 7682636 | 7699358 | 16723 | 0.07 | C_unshiu_00510 | 82748  | 99502  | 16755 | 8.9   | 98.65 |
| chr7 | 7738957 | 7759124 | 20168 | 0.08 | C_unshiu_00510 | 142099 | 162320 | 20222 | 10.74 | 98.58 |
| chr7 | 7774928 | 7777746 | 2819  | 0.01 | C_unshiu_00510 | 178550 | 181379 | 2830  | 1.5   | 98.87 |
| chr7 | 7779106 | 7780425 | 1320  | 0.01 | C_unshiu_01220 | 65173  | 63856  | 1318  | 1.58  | 99.7  |
| chr7 | 7781243 | 7793970 | 12728 | 0.05 | C_unshiu_01220 | 62659  | 49866  | 12794 | 15.3  | 98.15 |
| chr7 | 7794076 | 7800905 | 6830  | 0.03 | C_unshiu_01220 | 49602  | 42706  | 6897  | 8.25  | 98.3  |
| chr7 | 7811327 | 7818387 | 7061  | 0.03 | C_unshiu_01220 | 31780  | 24679  | 7102  | 8.5   | 99.03 |
| chr7 | 7847319 | 7854641 | 7323  | 0.03 | C_unshiu_00028 | 692961 | 685558 | 7404  | 1.03  | 98.12 |
| chr7 | 7894856 | 7898669 | 3814  | 0.02 | C_unshiu_00028 | 655031 | 651218 | 3814  | 0.53  | 99.97 |
| chr7 | 7902095 | 7903740 | 1646  | 0.01 | C_unshiu_00028 | 648962 | 647315 | 1648  | 0.23  | 99.64 |
| chr7 | 7910148 | 7915472 | 5325  | 0.02 | C_unshiu_00028 | 640177 | 634849 | 5329  | 0.74  | 99.34 |
| chr7 | 7916819 | 7928123 | 11305 | 0.05 | C_unshiu_00028 | 632856 | 621492 | 11365 | 1.58  | 98.82 |
| chr7 | 7940151 | 7942549 | 2399  | 0.01 | C_unshiu_00028 | 611637 | 609238 | 2400  | 0.33  | 98.04 |
| chr7 | 7942946 | 7945723 | 2778  | 0.01 | C_unshiu_00028 | 608626 | 605847 | 2780  | 0.39  | 99.68 |
| chr7 | 7945724 | 7949619 | 3896  | 0.02 | C_unshiu_00028 | 605387 | 601493 | 3895  | 0.54  | 99.36 |
| chr7 | 7953060 | 7966491 | 13432 | 0.06 | C_unshiu_00028 | 599412 | 585908 | 13505 | 1.88  | 98.53 |
| chr7 | 7966791 | 7974805 | 8015  | 0.03 | C_unshiu_00028 | 585120 | 577089 | 8032  | 1.12  | 99.08 |
| chr7 | 7991789 | 7997127 | 5339  | 0.02 | C_unshiu_00028 | 559753 | 554397 | 5357  | 0.75  | 99.05 |
| chr7 | 7997358 | 8007940 | 10583 | 0.04 | C_unshiu_00028 | 553159 | 542535 | 10625 | 1.48  | 98.87 |
| chr7 | 8010014 | 8011456 | 1443  | 0.01 | C_unshiu_00028 | 541941 | 540492 | 1450  | 0.2   | 99.03 |
| chr7 | 8013408 | 8014722 | 1315  | 0.01 | C_unshiu_00028 | 538205 | 536885 | 1321  | 0.18  | 99.09 |
| chr7 | 8020777 | 8031481 | 10705 | 0.05 | C_unshiu_00028 | 531894 | 521157 | 10738 | 1.49  | 98.18 |
| chr7 | 8037294 | 8044408 | 7115  | 0.03 | C_unshiu_00028 | 519028 | 511912 | 7117  | 0.99  | 99.16 |
| chr7 | 8044400 | 8052829 | 8430  | 0.04 | C_unshiu_00028 | 511793 | 503342 | 8452  | 1.18  | 98.92 |
| chr7 | 8103247 | 8111033 | 7787  | 0.03 | C_unshiu_00656 | 12516  | 20348  | 7833  | 5.07  | 98.37 |
| chr7 | 8114001 | 8115490 | 1490  | 0.01 | C_unshiu_00656 | 23509  | 24998  | 1490  | 0.96  | 100   |
| chr7 | 8115734 | 8120923 | 5190  | 0.02 | C_unshiu_00539 | 11136  | 5947   | 5190  | 2.86  | 99.56 |
| chr7 | 8120923 | 8126000 | 5078  | 0.02 | C_unshiu_00539 | 5815   | 738    | 5078  | 2.8   | 99.53 |
| chr7 | 8136977 | 8145834 | 8858  | 0.04 | C_unshiu_00966 | 77119  | 85949  | 8831  | 8.02  | 98.73 |
| chr7 | 8147707 | 8152003 | 4297  | 0.02 | C_unshiu_00966 | 87495  | 91794  | 4300  | 3.9   | 99.33 |
| chr7 | 8151979 | 8165536 | 13558 | 0.06 | C_unshiu_00966 | 92101  | 105620 | 13520 | 12.27 | 98.22 |
| chr7 | 8165734 | 8170236 | 4503  | 0.02 | C_unshiu_00966 | 105684 | 110155 | 4472  | 4.06  | 98.09 |
| chr7 | 8191693 | 8217873 | 26181 | 0.11 | C_unshiu_00104 | 400130 | 373750 | 26381 | 5.85  | 98.27 |
| chr7 | 8219923 | 8223143 | 3221  | 0.01 | C_unshiu_00104 | 372251 | 369016 | 3236  | 0.72  | 98.83 |
| chr7 | 8234883 | 8236747 | 1865  | 0.01 | C_unshiu_00104 | 356475 | 354611 | 1865  | 0.41  | 99.73 |
| chr7 | 8243213 | 8245356 | 2144  | 0.01 | C_unshiu_00818 | 59627  | 57484  | 2144  | 1.69  | 100   |
| chr7 | 8252680 | 8258255 | 5576  | 0.02 | C_unshiu_02086 | 8826   | 14404  | 5579  | 15.04 | 99.86 |
| chr7 | 8258262 | 8264017 | 5756  | 0.02 | C_unshiu_00104 | 340950 | 335188 | 5763  | 1.28  | 99.27 |
| chr7 | 8260399 | 8282290 | 21892 | 0.09 | C_unshiu_02086 | 15208  | 37103  | 21896 | 59.01 | 99.82 |
| chr7 | 8287012 | 8291189 | 4178  | 0.02 | C_unshiu_00607 | 153485 | 157659 | 4175  | 2.53  | 98.09 |

|      |         |         |       |      |                |        |        |       |       |       |
|------|---------|---------|-------|------|----------------|--------|--------|-------|-------|-------|
| chr7 | 8296718 | 8308084 | 11367 | 0.05 | C_unshiu_00558 | 126293 | 137662 | 11370 | 6.46  | 99.6  |
| chr7 | 8324937 | 8333665 | 8729  | 0.04 | C_unshiu_00446 | 177923 | 186651 | 8729  | 4.18  | 99.95 |
| chr7 | 8333772 | 8335115 | 1344  | 0.01 | C_unshiu_00446 | 186938 | 188281 | 1344  | 0.64  | 100   |
| chr7 | 8335136 | 8336562 | 1427  | 0.01 | C_unshiu_00446 | 189943 | 191369 | 1427  | 0.68  | 100   |
| chr7 | 8339162 | 8340403 | 1242  | 0.01 | C_unshiu_02936 | 13227  | 11986  | 1242  | 8.42  | 100   |
| chr7 | 8340838 | 8352112 | 11275 | 0.05 | C_unshiu_02936 | 11288  | 1      | 11288 | 76.5  | 99.1  |
| chr7 | 8347516 | 8357742 | 10227 | 0.04 | C_unshiu_02870 | 16416  | 6194   | 10223 | 62.27 | 99.82 |
| chr7 | 8357914 | 8367772 | 9859  | 0.04 | C_unshiu_00446 | 199068 | 208937 | 9870  | 4.72  | 99.15 |
| chr7 | 8364740 | 8368458 | 3719  | 0.02 | C_unshiu_00393 | 224478 | 220799 | 3680  | 1.64  | 98.26 |
| chr7 | 8369793 | 8378742 | 8950  | 0.04 | C_unshiu_00393 | 219684 | 210722 | 8963  | 3.99  | 98.07 |
| chr7 | 8378421 | 8386257 | 7837  | 0.03 | C_unshiu_02628 | 6519   | 14356  | 7838  | 36.47 | 99.62 |
| chr7 | 8386277 | 8390093 | 3817  | 0.02 | C_unshiu_00393 | 204727 | 200911 | 3817  | 1.7   | 99.87 |
| chr7 | 8392355 | 8395023 | 2669  | 0.01 | C_unshiu_02628 | 18826  | 21494  | 2669  | 12.42 | 99.25 |
| chr7 | 8399280 | 8404271 | 4992  | 0.02 | C_unshiu_00393 | 188993 | 184002 | 4992  | 2.22  | 99.76 |
| chr7 | 8405169 | 8410180 | 5012  | 0.02 | C_unshiu_01321 | 19717  | 24707  | 4991  | 6.62  | 98.59 |
| chr7 | 8406396 | 8429779 | 23384 | 0.1  | C_unshiu_00393 | 170013 | 146616 | 23398 | 10.42 | 99.02 |
| chr7 | 8434000 | 8447760 | 13761 | 0.06 | C_unshiu_00393 | 143265 | 129482 | 13784 | 6.14  | 99.8  |
| chr7 | 8447781 | 8449995 | 2215  | 0.01 | C_unshiu_00106 | 146126 | 148340 | 2215  | 0.49  | 99.91 |
| chr7 | 8453813 | 8454815 | 1003  | 0    | C_unshiu_01854 | 41882  | 40880  | 1003  | 2.17  | 100   |
| chr7 | 8460481 | 8462426 | 1946  | 0.01 | C_unshiu_02100 | 36029  | 34085  | 1945  | 5.33  | 99.69 |
| chr7 | 8464706 | 8467001 | 2296  | 0.01 | C_unshiu_00916 | 15925  | 13629  | 2297  | 1.99  | 98.48 |
| chr7 | 8464706 | 8467001 | 2296  | 0.01 | C_unshiu_01854 | 35259  | 32964  | 2296  | 4.96  | 99.39 |
| chr7 | 8468744 | 8472524 | 3781  | 0.02 | C_unshiu_00916 | 12502  | 8716   | 3787  | 3.29  | 99.84 |
| chr7 | 8478029 | 8482563 | 4535  | 0.02 | C_unshiu_01854 | 29222  | 24688  | 4535  | 9.79  | 98.99 |
| chr7 | 8490678 | 8491927 | 1250  | 0.01 | C_unshiu_01854 | 16957  | 15718  | 1240  | 2.68  | 98.56 |
| chr7 | 8493664 | 8499679 | 6016  | 0.03 | C_unshiu_01854 | 10970  | 4952   | 6019  | 13    | 99.4  |
| chr7 | 8500096 | 8502509 | 2414  | 0.01 | C_unshiu_01854 | 4053   | 1640   | 2414  | 5.21  | 99.96 |
| chr7 | 8505630 | 8507355 | 1726  | 0.01 | C_unshiu_00445 | 41710  | 43441  | 1732  | 0.83  | 99.48 |
| chr7 | 8511078 | 8519612 | 8535  | 0.04 | C_unshiu_00445 | 46065  | 54670  | 8606  | 4.12  | 98.03 |
| chr7 | 8520428 | 8523817 | 3390  | 0.01 | C_unshiu_00445 | 55211  | 58595  | 3385  | 1.62  | 99.23 |
| chr7 | 8523599 | 8586327 | 62729 | 0.26 | C_unshiu_00445 | 58815  | 121640 | 62826 | 30.06 | 99.45 |
| chr7 | 8586666 | 8594150 | 7485  | 0.03 | C_unshiu_00445 | 122241 | 129811 | 7571  | 3.62  | 98.76 |
| chr7 | 8595673 | 8612248 | 16576 | 0.07 | C_unshiu_00445 | 129809 | 146402 | 16594 | 7.94  | 99.72 |
| chr7 | 8612240 | 8613771 | 1532  | 0.01 | C_unshiu_00445 | 146552 | 148083 | 1532  | 0.73  | 100   |
| chr7 | 8616770 | 8621640 | 4871  | 0.02 | C_unshiu_00445 | 149940 | 154811 | 4872  | 2.33  | 99.96 |
| chr7 | 8622631 | 8630019 | 7389  | 0.03 | C_unshiu_00445 | 154841 | 162229 | 7389  | 3.54  | 99.93 |
| chr7 | 8629971 | 8638277 | 8307  | 0.03 | C_unshiu_00445 | 195685 | 187387 | 8299  | 3.97  | 98.52 |
| chr7 | 8639452 | 8666296 | 26845 | 0.11 | C_unshiu_00445 | 189117 | 162236 | 26882 | 12.86 | 99.36 |
| chr7 | 8666334 | 8670241 | 3908  | 0.02 | C_unshiu_00445 | 195684 | 199590 | 3907  | 1.87  | 99.87 |
| chr7 | 8670922 | 8672329 | 1408  | 0.01 | C_unshiu_00445 | 201407 | 202813 | 1407  | 0.67  | 99.72 |
| chr7 | 8673043 | 8675470 | 2428  | 0.01 | C_unshiu_00445 | 204047 | 206474 | 2428  | 1.16  | 100   |
| chr7 | 8675493 | 8677660 | 2168  | 0.01 | C_unshiu_00445 | 206802 | 208969 | 2168  | 1.04  | 99.82 |
| chr7 | 8684447 | 8711125 | 26679 | 0.11 | C_unshiu_01285 | 74421  | 47741  | 26681 | 34.03 | 99.99 |
| chr7 | 8713425 | 8717536 | 4112  | 0.02 | C_unshiu_01285 | 44816  | 40701  | 4116  | 5.25  | 99.35 |
| chr7 | 8717537 | 8732487 | 14951 | 0.06 | C_unshiu_01285 | 41344  | 26414  | 14931 | 19.05 | 99.51 |
| chr7 | 8746651 | 8798714 | 52064 | 0.22 | C_unshiu_00908 | 10062  | 62091  | 52030 | 44.74 | 99.92 |
| chr7 | 8778717 | 8812985 | 34269 | 0.14 | C_unshiu_00908 | 42116  | 76395  | 34280 | 29.48 | 99.77 |
| chr7 | 8813008 | 8847698 | 34691 | 0.15 | C_unshiu_00908 | 76281  | 110970 | 34690 | 29.83 | 99.99 |
| chr7 | 8852800 | 8870996 | 18197 | 0.08 | C_unshiu_02102 | 1      | 18169  | 18169 | 49.94 | 99.3  |
| chr7 | 8874930 | 8883388 | 8459  | 0.04 | C_unshiu_02734 | 8463   | 1      | 8463  | 43.97 | 99.66 |
| chr7 | 8895050 | 8902128 | 7079  | 0.03 | C_unshiu_00357 | 118382 | 125460 | 7079  | 2.98  | 100   |
| chr7 | 8902129 | 8903622 | 1494  | 0.01 | C_unshiu_00655 | 35300  | 33807  | 1494  | 0.97  | 100   |
| chr7 | 8903829 | 8910116 | 6288  | 0.03 | C_unshiu_00655 | 33508  | 27225  | 6284  | 4.06  | 99.86 |
| chr7 | 8918705 | 8919743 | 1039  | 0    | C_unshiu_01669 | 18997  | 20035  | 1039  | 1.92  | 99.23 |
| chr7 | 8921195 | 8925244 | 4050  | 0.02 | C_unshiu_01669 | 28091  | 24042  | 4050  | 7.48  | 99.98 |
| chr7 | 8940339 | 8941483 | 1145  | 0    | C_unshiu_01829 | 19635  | 18491  | 1145  | 2.41  | 100   |
| chr7 | 8941484 | 8943300 | 1817  | 0.01 | C_unshiu_00780 | 19207  | 21023  | 1817  | 1.39  | 100   |
| chr7 | 8944593 | 8945896 | 1304  | 0.01 | C_unshiu_00708 | 94580  | 95883  | 1304  | 0.91  | 100   |
| chr7 | 8948716 | 8949958 | 1243  | 0.01 | C_unshiu_00656 | 28323  | 29565  | 1243  | 0.8   | 99.36 |
| chr7 | 8951415 | 8957364 | 5950  | 0.03 | C_unshiu_00656 | 31248  | 37211  | 5964  | 3.86  | 99.21 |
| chr7 | 8959855 | 8961263 | 1409  | 0.01 | C_unshiu_00310 | 173635 | 172230 | 1406  | 0.54  | 98.72 |
| chr7 | 8967529 | 8971755 | 4227  | 0.02 | C_unshiu_00656 | 44733  | 48949  | 4217  | 2.73  | 98.98 |
| chr7 | 8972581 | 8975056 | 2476  | 0.01 | C_unshiu_00656 | 49593  | 52077  | 2485  | 1.61  | 98.32 |
| chr7 | 8975290 | 8978112 | 2823  | 0.01 | C_unshiu_00656 | 52268  | 55092  | 2825  | 1.83  | 98.94 |
| chr7 | 8984392 | 8987862 | 3471  | 0.01 | C_unshiu_02640 | 7986   | 4514   | 3473  | 16.42 | 99.2  |
| chr7 | 8989483 | 8993363 | 3881  | 0.02 | C_unshiu_02640 | 3875   | 1      | 3875  | 18.32 | 98.61 |
| chr7 | 8989485 | 8996741 | 7257  | 0.03 | C_unshiu_00656 | 64184  | 71437  | 7254  | 4.69  | 98.3  |
| chr7 | 9003981 | 9005922 | 1942  | 0.01 | C_unshiu_00656 | 84658  | 86609  | 1952  | 1.26  | 98.36 |
| chr7 | 9012391 | 9019568 | 7178  | 0.03 | C_unshiu_00656 | 93433  | 100617 | 7185  | 4.65  | 98.29 |
| chr7 | 9022870 | 9030791 | 7922  | 0.03 | C_unshiu_00656 | 103479 | 111400 | 7922  | 5.13  | 99.24 |
| chr7 | 9031331 | 9040205 | 8875  | 0.04 | C_unshiu_00656 | 111919 | 120817 | 8899  | 5.76  | 98.04 |
| chr7 | 9051944 | 9062468 | 10525 | 0.04 | C_unshiu_00764 | 134423 | 123914 | 10510 | 7.82  | 98.6  |
| chr7 | 9063595 | 9068133 | 4539  | 0.02 | C_unshiu_00656 | 145183 | 149721 | 4539  | 2.94  | 99.89 |
| chr7 | 9068150 | 9070202 | 2053  | 0.01 | C_unshiu_00656 | 150626 | 152678 | 2053  | 1.33  | 99.95 |
| chr7 | 9112328 | 9113906 | 1579  | 0.01 | C_unshiu_02109 | 36253  | 34679  | 1575  | 4.34  | 98.67 |
| chr7 | 9114795 | 9120366 | 5572  | 0.02 | C_unshiu_00764 | 75164  | 69537  | 5628  | 4.19  | 98.45 |
| chr7 | 9125996 | 9128896 | 2901  | 0.01 | C_unshiu_02109 | 22685  | 19785  | 2901  | 8     | 99.48 |
| chr7 | 9130029 | 9136399 | 6371  | 0.03 | C_unshiu_02109 | 18390  | 12073  | 6318  | 17.43 | 98.48 |
| chr7 | 9134904 | 9139223 | 4320  | 0.02 | C_unshiu_00764 | 54207  | 49871  | 4337  | 3.23  | 98.85 |

|      |          |          |       |      |                |        |        |       |       |       |
|------|----------|----------|-------|------|----------------|--------|--------|-------|-------|-------|
| chr7 | 9141142  | 9159542  | 18401 | 0.08 | C_unshiu_00764 | 47287  | 28865  | 18423 | 13.71 | 98.42 |
| chr7 | 9173915  | 9186812  | 12898 | 0.05 | C_unshiu_00764 | 15402  | 2492   | 12911 | 9.6   | 98.2  |
| chr7 | 9187986  | 9190281  | 2296  | 0.01 | C_unshiu_00764 | 2296   | 1      | 2296  | 1.71  | 100   |
| chr7 | 9214755  | 9242687  | 27933 | 0.12 | C_unshiu_00853 | 97604  | 69614  | 27991 | 22.87 | 98.58 |
| chr7 | 9242571  | 9283055  | 40485 | 0.17 | C_unshiu_00853 | 69612  | 28979  | 40634 | 33.2  | 99.07 |
| chr7 | 9285233  | 9287657  | 2425  | 0.01 | C_unshiu_00853 | 25963  | 23529  | 2435  | 1.99  | 98.24 |
| chr7 | 9294669  | 9313220  | 18552 | 0.08 | C_unshiu_01662 | 1      | 18583  | 18583 | 34.1  | 98.15 |
| chr7 | 9343932  | 9349953  | 6022  | 0.03 | C_unshiu_01067 | 1      | 5992   | 5992  | 6.06  | 98.17 |
| chr7 | 9350205  | 9351780  | 1576  | 0.01 | C_unshiu_01067 | 6189   | 7763   | 1575  | 1.59  | 98.67 |
| chr7 | 9367480  | 9402405  | 34926 | 0.15 | C_unshiu_00789 | 121279 | 86233  | 35047 | 26.99 | 98.77 |
| chr7 | 9414553  | 9422215  | 7663  | 0.03 | C_unshiu_00789 | 74221  | 66538  | 7684  | 5.92  | 98.3  |
| chr7 | 9430223  | 9431669  | 1447  | 0.01 | C_unshiu_00789 | 66211  | 64764  | 1448  | 1.11  | 98.69 |
| chr7 | 9434678  | 9439680  | 5003  | 0.02 | C_unshiu_00789 | 60469  | 55460  | 5010  | 3.86  | 99.26 |
| chr7 | 9439676  | 9443685  | 4010  | 0.02 | C_unshiu_00789 | 55409  | 51397  | 4013  | 3.09  | 99.53 |
| chr7 | 9446534  | 9453964  | 7431  | 0.03 | C_unshiu_00789 | 47619  | 40176  | 7444  | 5.73  | 98.09 |
| chr7 | 9485660  | 9486695  | 1036  | 0    | C_unshiu_00789 | 16213  | 15178  | 1036  | 0.8   | 100   |
| chr7 | 9486696  | 9488007  | 1312  | 0.01 | C_unshiu_00423 | 165870 | 164559 | 1312  | 0.6   | 100   |
| chr7 | 9488947  | 9507559  | 18613 | 0.08 | C_unshiu_01948 | 8784   | 27432  | 18649 | 43.55 | 98.66 |
| chr7 | 9507770  | 9512169  | 4400  | 0.02 | C_unshiu_01948 | 27970  | 32364  | 4395  | 10.26 | 99.23 |
| chr7 | 9514538  | 9519765  | 5228  | 0.02 | C_unshiu_01948 | 33617  | 38861  | 5245  | 12.25 | 98.44 |
| chr7 | 9519684  | 9547800  | 28117 | 0.12 | C_unshiu_00288 | 250207 | 222092 | 28116 | 10.32 | 98.47 |
| chr7 | 9560689  | 9577410  | 16722 | 0.07 | C_unshiu_00288 | 209016 | 192135 | 16882 | 6.19  | 98.17 |
| chr7 | 9594478  | 9603704  | 9227  | 0.04 | C_unshiu_00288 | 179019 | 169776 | 9244  | 3.39  | 98.08 |
| chr7 | 9603686  | 9607414  | 3729  | 0.02 | C_unshiu_00288 | 169696 | 165973 | 3724  | 1.37  | 99.28 |
| chr7 | 9608647  | 9624216  | 15570 | 0.07 | C_unshiu_00288 | 165059 | 149497 | 15563 | 5.71  | 98.6  |
| chr7 | 9630203  | 9644730  | 14528 | 0.06 | C_unshiu_00288 | 143532 | 128966 | 14567 | 5.34  | 98.53 |
| chr7 | 9654246  | 9658925  | 4680  | 0.02 | C_unshiu_00303 | 1      | 4675   | 4675  | 1.76  | 99.4  |
| chr7 | 9670948  | 9673645  | 2698  | 0.01 | C_unshiu_00303 | 16587  | 19289  | 2703  | 1.02  | 98.71 |
| chr7 | 9673944  | 9687770  | 13827 | 0.06 | C_unshiu_00303 | 19621  | 33465  | 13845 | 5.21  | 98.65 |
| chr7 | 9690809  | 9691873  | 1065  | 0    | C_unshiu_00079 | 46743  | 45679  | 1065  | 0.21  | 98.04 |
| chr7 | 9693236  | 9706496  | 13261 | 0.06 | C_unshiu_00303 | 38799  | 52183  | 13385 | 5.04  | 98.08 |
| chr7 | 9736735  | 9747251  | 10517 | 0.04 | C_unshiu_00303 | 83843  | 94414  | 10572 | 3.98  | 98.23 |
| chr7 | 9748749  | 9751291  | 2543  | 0.01 | C_unshiu_00303 | 96145  | 98704  | 2560  | 0.96  | 98.32 |
| chr7 | 9772347  | 9788519  | 16173 | 0.07 | C_unshiu_00303 | 120411 | 136617 | 16207 | 6.1   | 99.03 |
| chr7 | 9791855  | 9799286  | 7432  | 0.03 | C_unshiu_00303 | 139944 | 147395 | 7452  | 2.81  | 98.21 |
| chr7 | 9799279  | 9800835  | 1557  | 0.01 | C_unshiu_00303 | 147842 | 149403 | 1562  | 0.59  | 98.53 |
| chr7 | 9824912  | 9828585  | 3674  | 0.02 | C_unshiu_00303 | 171536 | 175217 | 3682  | 1.39  | 98.7  |
| chr7 | 9850043  | 9852054  | 2012  | 0.01 | C_unshiu_00303 | 194991 | 197016 | 2026  | 0.76  | 98.32 |
| chr7 | 9874746  | 9876074  | 1329  | 0.01 | C_unshiu_00480 | 65495  | 64167  | 1329  | 0.67  | 100   |
| chr7 | 9881843  | 9889418  | 7576  | 0.03 | C_unshiu_00303 | 229089 | 236653 | 7565  | 2.85  | 98.21 |
| chr7 | 9905438  | 9914004  | 8567  | 0.04 | C_unshiu_00761 | 1      | 8549   | 8549  | 6.34  | 98.37 |
| chr7 | 9914901  | 9921221  | 6321  | 0.03 | C_unshiu_00303 | 254306 | 260641 | 6336  | 2.39  | 99.72 |
| chr7 | 9928293  | 9936151  | 7859  | 0.03 | C_unshiu_00761 | 17241  | 25118  | 7878  | 5.84  | 99.11 |
| chr7 | 9986212  | 9987484  | 1273  | 0.01 | C_unshiu_00761 | 50639  | 51917  | 1279  | 0.95  | 99.22 |
| chr7 | 10024429 | 10026606 | 2178  | 0.01 | C_unshiu_00508 | 189008 | 186822 | 2187  | 1.16  | 98.58 |
| chr7 | 10027578 | 10039043 | 11466 | 0.05 | C_unshiu_00761 | 91876  | 103328 | 11453 | 8.49  | 99.36 |
| chr7 | 10044673 | 10047349 | 2677  | 0.01 | C_unshiu_00761 | 108067 | 110730 | 2664  | 1.98  | 98.43 |
| chr7 | 10048776 | 10054486 | 5711  | 0.02 | C_unshiu_00761 | 112660 | 118370 | 5711  | 4.24  | 100   |
| chr7 | 10054716 | 10058281 | 3566  | 0.02 | C_unshiu_00761 | 118798 | 122378 | 3581  | 2.66  | 99.58 |
| chr7 | 10061825 | 10066244 | 4420  | 0.02 | C_unshiu_00761 | 102687 | 107099 | 4413  | 3.27  | 99.52 |
| chr7 | 10071336 | 10086928 | 15593 | 0.07 | C_unshiu_00508 | 160494 | 144871 | 15624 | 8.27  | 98.6  |
| chr7 | 10087683 | 10098679 | 10997 | 0.05 | C_unshiu_00508 | 142890 | 131858 | 11033 | 5.84  | 98.05 |
| chr7 | 10099527 | 10111422 | 11896 | 0.05 | C_unshiu_00508 | 131813 | 119888 | 11926 | 6.31  | 98.08 |
| chr7 | 10128740 | 10131167 | 2428  | 0.01 | C_unshiu_03128 | 2565   | 138    | 2428  | 33.25 | 100   |
| chr7 | 10129591 | 10131167 | 1577  | 0.01 | C_unshiu_03128 | 7303   | 5713   | 1591  | 21.79 | 98.43 |
| chr7 | 10136171 | 10137375 | 1205  | 0.01 | C_unshiu_00180 | 37424  | 36220  | 1205  | 0.34  | 100   |
| chr7 | 10137376 | 10151819 | 14444 | 0.06 | C_unshiu_00508 | 98669  | 84212  | 14458 | 7.65  | 98.75 |
| chr7 | 10178907 | 10185247 | 6341  | 0.03 | C_unshiu_01120 | 34178  | 40509  | 6332  | 6.75  | 98.48 |
| chr7 | 10190411 | 10212484 | 22074 | 0.09 | C_unshiu_01120 | 47220  | 69412  | 22193 | 23.65 | 98.18 |
| chr7 | 10215030 | 10220922 | 5893  | 0.02 | C_unshiu_01120 | 76893  | 82829  | 5937  | 6.33  | 98.11 |
| chr7 | 10221608 | 10222773 | 1166  | 0    | C_unshiu_00891 | 4855   | 6020   | 1166  | 0.99  | 99.66 |
| chr7 | 10258489 | 10263442 | 4954  | 0.02 | C_unshiu_00891 | 39282  | 44250  | 4969  | 4.2   | 98.11 |
| chr7 | 10281729 | 10287209 | 5481  | 0.02 | C_unshiu_00891 | 60162  | 65665  | 5504  | 4.66  | 98.11 |
| chr7 | 10287946 | 10289722 | 1777  | 0.01 | C_unshiu_02546 | 23426  | 21648  | 1779  | 7.59  | 98.88 |
| chr7 | 10294338 | 10296345 | 2008  | 0.01 | C_unshiu_00891 | 73639  | 75644  | 2006  | 1.7   | 99.1  |
| chr7 | 10294338 | 10296345 | 2008  | 0.01 | C_unshiu_02546 | 16900  | 14877  | 2024  | 8.64  | 99.01 |
| chr7 | 10296373 | 10299178 | 2806  | 0.01 | C_unshiu_02546 | 14460  | 11655  | 2806  | 11.98 | 99.68 |
| chr7 | 10299269 | 10306924 | 7656  | 0.03 | C_unshiu_02546 | 11541  | 3905   | 7637  | 32.6  | 98.59 |
| chr7 | 10306992 | 10317325 | 10334 | 0.04 | C_unshiu_00891 | 85767  | 96103  | 10337 | 8.74  | 98.43 |
| chr7 | 10317935 | 10321193 | 3259  | 0.01 | C_unshiu_02871 | 12889  | 9620   | 3270  | 19.93 | 99.11 |
| chr7 | 10323380 | 10330975 | 7596  | 0.03 | C_unshiu_02871 | 7607   | 1      | 7607  | 46.36 | 98.94 |
| chr7 | 10325258 | 10346651 | 21394 | 0.09 | C_unshiu_00627 | 92456  | 71069  | 21388 | 13.28 | 98.49 |
| chr7 | 10351044 | 10354224 | 3181  | 0.01 | C_unshiu_00696 | 132109 | 128928 | 3182  | 2.21  | 98.49 |
| chr7 | 10355027 | 10359249 | 4223  | 0.02 | C_unshiu_00627 | 63066  | 58842  | 4225  | 2.62  | 99.76 |
| chr7 | 10386936 | 10404228 | 17293 | 0.07 | C_unshiu_00696 | 98324  | 80996  | 17329 | 12.03 | 98.7  |
| chr7 | 10423600 | 10424849 | 1250  | 0.01 | C_unshiu_02210 | 6372   | 7620   | 1249  | 3.8   | 98.48 |
| chr7 | 10432952 | 10434303 | 1352  | 0.01 | C_unshiu_00696 | 52253  | 50902  | 1352  | 0.94  | 99.93 |
| chr7 | 10434411 | 10448327 | 13917 | 0.06 | C_unshiu_00696 | 50379  | 36438  | 13942 | 9.68  | 98.42 |
| chr7 | 10449916 | 10461606 | 11691 | 0.05 | C_unshiu_00696 | 35684  | 23968  | 11717 | 8.13  | 98.8  |

|      |          |          |       |      |                |        |        |       |       |       |
|------|----------|----------|-------|------|----------------|--------|--------|-------|-------|-------|
| chr7 | 10475159 | 10480055 | 4897  | 0.02 | C_unshiu_00696 | 1      | 4909   | 4909  | 3.41  | 98.29 |
| chr7 | 10497099 | 10504701 | 7603  | 0.03 | C_unshiu_00505 | 171735 | 164101 | 7635  | 4.02  | 98.51 |
| chr7 | 10507804 | 10518125 | 10322 | 0.04 | C_unshiu_00505 | 162119 | 151720 | 10400 | 5.47  | 98.25 |
| chr7 | 10522980 | 10529258 | 6279  | 0.03 | C_unshiu_00505 | 147078 | 140802 | 6277  | 3.3   | 99.24 |
| chr7 | 10522983 | 10529258 | 6276  | 0.03 | C_unshiu_00505 | 129411 | 123127 | 6285  | 3.31  | 99.21 |
| chr7 | 10532932 | 10544247 | 11316 | 0.05 | C_unshiu_00505 | 120425 | 109071 | 11355 | 5.98  | 98.06 |
| chr7 | 10544564 | 10564824 | 20261 | 0.09 | C_unshiu_00505 | 108928 | 88647  | 20282 | 10.67 | 98.4  |
| chr7 | 10565200 | 10573356 | 8157  | 0.03 | C_unshiu_00505 | 87710  | 79556  | 8155  | 4.29  | 98.74 |
| chr7 | 10573609 | 10611910 | 38302 | 0.16 | C_unshiu_00505 | 78879  | 40448  | 38432 | 20.23 | 98.2  |
| chr7 | 10629623 | 10632164 | 2542  | 0.01 | C_unshiu_00505 | 21949  | 19407  | 2543  | 1.34  | 99.02 |
| chr7 | 10633830 | 10638072 | 4243  | 0.02 | C_unshiu_00505 | 17210  | 12965  | 4246  | 2.23  | 98.87 |
| chr7 | 10638073 | 10644740 | 6668  | 0.03 | C_unshiu_01356 | 61178  | 54511  | 6668  | 9.04  | 100   |
| chr7 | 10651786 | 10658053 | 6268  | 0.03 | C_unshiu_00726 | 22647  | 16450  | 6198  | 4.45  | 98.23 |
| chr7 | 10662281 | 10664243 | 1963  | 0.01 | C_unshiu_00264 | 269144 | 267182 | 1963  | 0.69  | 100   |
| chr7 | 10664243 | 10667007 | 2765  | 0.01 | C_unshiu_00726 | 37022  | 34246  | 2777  | 1.99  | 98.35 |
| chr7 | 10667019 | 10668795 | 1777  | 0.01 | C_unshiu_00726 | 34496  | 32718  | 1779  | 1.28  | 99.72 |
| chr7 | 10669580 | 10671220 | 1641  | 0.01 | C_unshiu_00505 | 12614  | 10972  | 1643  | 0.86  | 98.6  |
| chr7 | 10671778 | 10677663 | 5886  | 0.02 | C_unshiu_00726 | 49957  | 44056  | 5902  | 4.24  | 99.2  |
| chr7 | 10671778 | 10677663 | 5886  | 0.02 | C_unshiu_00726 | 57110  | 62999  | 5890  | 4.23  | 98.81 |
| chr7 | 10678711 | 10680247 | 1537  | 0.01 | C_unshiu_00726 | 64418  | 65954  | 1537  | 1.1   | 99.87 |
| chr7 | 10685028 | 10688819 | 3792  | 0.02 | C_unshiu_00726 | 68399  | 72197  | 3799  | 2.73  | 99.08 |
| chr7 | 10689140 | 10691276 | 2137  | 0.01 | C_unshiu_00726 | 72334  | 74464  | 2131  | 1.53  | 98.92 |
| chr7 | 10692580 | 10702392 | 9813  | 0.04 | C_unshiu_00726 | 77084  | 86884  | 9801  | 7.03  | 98.68 |
| chr7 | 10731074 | 10734321 | 3248  | 0.01 | C_unshiu_00726 | 118267 | 121523 | 3257  | 2.34  | 99.17 |
| chr7 | 10734990 | 10740946 | 5957  | 0.03 | C_unshiu_00726 | 122286 | 128242 | 5957  | 4.28  | 98.26 |
| chr7 | 10770841 | 10776648 | 5808  | 0.02 | C_unshiu_00437 | 33205  | 39020  | 5816  | 2.74  | 99.83 |
| chr7 | 10777284 | 10781293 | 4010  | 0.02 | C_unshiu_00437 | 40124  | 44134  | 4011  | 1.89  | 99.98 |
| chr7 | 10781355 | 10783588 | 2234  | 0.01 | C_unshiu_00437 | 44477  | 46710  | 2234  | 1.05  | 99.46 |
| chr7 | 10786712 | 10790157 | 3446  | 0.01 | C_unshiu_00437 | 48491  | 51936  | 3446  | 1.62  | 100   |
| chr7 | 10790314 | 10801074 | 10761 | 0.05 | C_unshiu_00437 | 52284  | 63044  | 10761 | 5.06  | 100   |
| chr7 | 10801396 | 10803123 | 1728  | 0.01 | C_unshiu_00437 | 63507  | 65230  | 1724  | 0.81  | 99.6  |
| chr7 | 10826812 | 10832048 | 5237  | 0.02 | C_unshiu_00437 | 88049  | 93307  | 5259  | 2.47  | 99.09 |
| chr7 | 10863317 | 10875268 | 11952 | 0.05 | C_unshiu_00437 | 126210 | 138187 | 11978 | 5.64  | 99.37 |
| chr7 | 10875266 | 10877330 | 2065  | 0.01 | C_unshiu_00437 | 138807 | 140870 | 2064  | 0.97  | 98.16 |
| chr7 | 10889005 | 10901673 | 12669 | 0.05 | C_unshiu_00437 | 152159 | 164822 | 12664 | 5.96  | 99.3  |
| chr7 | 10902086 | 10908850 | 6765  | 0.03 | C_unshiu_00437 | 165652 | 172439 | 6788  | 3.19  | 98.78 |
| chr7 | 10910171 | 10920029 | 9859  | 0.04 | C_unshiu_02655 | 1551   | 11465  | 9915  | 47.59 | 98.39 |
| chr7 | 10922306 | 10929301 | 6996  | 0.03 | C_unshiu_00437 | 186571 | 193565 | 6995  | 3.29  | 99.71 |
| chr7 | 10929311 | 10934196 | 4886  | 0.02 | C_unshiu_00437 | 193808 | 198711 | 4904  | 2.31  | 98.21 |
| chr7 | 10934445 | 10940954 | 6510  | 0.03 | C_unshiu_00437 | 198707 | 205240 | 6534  | 3.07  | 98.36 |
| chr7 | 10941866 | 10962737 | 20872 | 0.09 | C_unshiu_00166 | 351908 | 330965 | 20944 | 5.66  | 99.14 |
| chr7 | 10964672 | 10980291 | 15620 | 0.07 | C_unshiu_00166 | 328567 | 312769 | 15799 | 4.27  | 98.11 |
| chr7 | 11007953 | 11010602 | 2650  | 0.01 | C_unshiu_00166 | 284349 | 281686 | 2664  | 0.72  | 98.35 |
| chr7 | 11027216 | 11031027 | 3812  | 0.02 | C_unshiu_00166 | 263732 | 259918 | 3815  | 1.03  | 99.37 |
| chr7 | 11037255 | 11048315 | 11061 | 0.05 | C_unshiu_00166 | 252817 | 241757 | 11061 | 2.99  | 99.99 |
| chr7 | 11049939 | 11065134 | 15196 | 0.06 | C_unshiu_00166 | 239380 | 224221 | 15160 | 4.1   | 99.05 |
| chr7 | 11065208 | 11082890 | 17683 | 0.07 | C_unshiu_00166 | 223198 | 205462 | 17737 | 4.8   | 98.92 |
| chr7 | 11096725 | 11103893 | 7169  | 0.03 | C_unshiu_00166 | 191034 | 183849 | 7186  | 1.94  | 98.46 |
| chr7 | 11103910 | 11105515 | 1606  | 0.01 | C_unshiu_00166 | 181099 | 179494 | 1606  | 0.43  | 100   |
| chr7 | 11107564 | 11124713 | 17150 | 0.07 | C_unshiu_00166 | 176844 | 159589 | 17256 | 4.67  | 98.66 |
| chr7 | 11124569 | 11167956 | 43388 | 0.18 | C_unshiu_00166 | 159681 | 116242 | 43440 | 11.74 | 98.15 |
| chr7 | 11168453 | 11196390 | 27938 | 0.12 | C_unshiu_00166 | 115784 | 87827  | 27958 | 7.56  | 98.98 |
| chr7 | 11252822 | 11268245 | 15424 | 0.06 | C_unshiu_00166 | 33049  | 17611  | 15439 | 4.17  | 98.48 |
| chr7 | 11268244 | 11270157 | 1914  | 0.01 | C_unshiu_00166 | 17510  | 15582  | 1929  | 0.52  | 98.71 |
| chr7 | 11268714 | 11270157 | 1444  | 0.01 | C_unshiu_00397 | 65296  | 63850  | 1447  | 0.65  | 99.38 |
| chr7 | 11331653 | 11332313 | 1561  | 0.01 | C_unshiu_00397 | 130420 | 131987 | 1568  | 0.7   | 99.3  |
| chr7 | 11333740 | 11336120 | 2381  | 0.01 | C_unshiu_00397 | 132907 | 135303 | 2397  | 1.07  | 98.21 |
| chr7 | 11337879 | 11339534 | 1656  | 0.01 | C_unshiu_00397 | 137529 | 139195 | 1667  | 0.75  | 98.38 |
| chr7 | 11339562 | 11359979 | 20418 | 0.09 | C_unshiu_00397 | 139490 | 159913 | 20424 | 9.14  | 99.12 |
| chr7 | 11360520 | 11369434 | 8915  | 0.04 | C_unshiu_00397 | 160035 | 168960 | 8926  | 4     | 98.96 |
| chr7 | 11372212 | 11384962 | 12751 | 0.05 | C_unshiu_00397 | 170414 | 183198 | 12785 | 5.72  | 98.68 |
| chr7 | 11384955 | 11395671 | 10717 | 0.05 | C_unshiu_00397 | 183911 | 194700 | 10790 | 4.83  | 98.11 |
| chr7 | 11397843 | 11400882 | 3040  | 0.01 | C_unshiu_00397 | 196143 | 199182 | 3040  | 1.36  | 99.51 |
| chr7 | 11403231 | 11407581 | 4351  | 0.02 | C_unshiu_00397 | 201067 | 205434 | 4368  | 1.96  | 98.11 |
| chr7 | 11407920 | 11410360 | 2441  | 0.01 | C_unshiu_00065 | 10998  | 13438  | 2441  | 0.44  | 99.67 |
| chr7 | 11423535 | 11426626 | 3092  | 0.01 | C_unshiu_02913 | 1      | 3082   | 3082  | 19.89 | 98.09 |
| chr7 | 11426619 | 11428393 | 1775  | 0.01 | C_unshiu_00397 | 221655 | 223426 | 1772  | 0.79  | 99.04 |
| chr7 | 11434072 | 11436804 | 2733  | 0.01 | C_unshiu_00739 | 123838 | 121106 | 2733  | 1.98  | 99.96 |
| chr7 | 11439192 | 11444689 | 5498  | 0.02 | C_unshiu_00065 | 38309  | 43794  | 5486  | 0.99  | 98.75 |
| chr7 | 11447240 | 11455023 | 7784  | 0.03 | C_unshiu_00065 | 46704  | 54504  | 7801  | 1.41  | 98.04 |
| chr7 | 11455280 | 11459191 | 3912  | 0.02 | C_unshiu_00065 | 54777  | 58692  | 3916  | 0.71  | 98.58 |
| chr7 | 11459526 | 11461702 | 2177  | 0.01 | C_unshiu_00065 | 59659  | 61853  | 2195  | 0.4   | 98.5  |
| chr7 | 11462139 | 11472244 | 10106 | 0.04 | C_unshiu_00065 | 63286  | 73413  | 10128 | 1.83  | 98.6  |
| chr7 | 11472223 | 11474862 | 2640  | 0.01 | C_unshiu_00065 | 73796  | 76427  | 2632  | 0.48  | 98.98 |
| chr7 | 11540865 | 11543993 | 3129  | 0.01 | C_unshiu_00065 | 137627 | 140758 | 3132  | 0.57  | 99.39 |
| chr7 | 11561252 | 11563150 | 1899  | 0.01 | C_unshiu_00065 | 158575 | 160477 | 1903  | 0.34  | 99.11 |
| chr7 | 11574156 | 11601332 | 27177 | 0.11 | C_unshiu_00065 | 174520 | 201772 | 27253 | 4.93  | 98.84 |
| chr7 | 11601490 | 11604440 | 2951  | 0.01 | C_unshiu_00065 | 201772 | 204736 | 2965  | 0.54  | 98.72 |
| chr7 | 11605673 | 11615232 | 9560  | 0.04 | C_unshiu_00065 | 204733 | 214294 | 9562  | 1.73  | 98.11 |

|      |          |          |       |      |                |        |        |       |       |       |
|------|----------|----------|-------|------|----------------|--------|--------|-------|-------|-------|
| chr7 | 11616663 | 11625778 | 9116  | 0.04 | C_unshiu_00065 | 214416 | 223510 | 9095  | 1.65  | 98.65 |
| chr7 | 11632049 | 11641233 | 9185  | 0.04 | C_unshiu_00065 | 229735 | 238945 | 9211  | 1.67  | 98.26 |
| chr7 | 11641771 | 11657050 | 15280 | 0.06 | C_unshiu_00065 | 239496 | 254852 | 15357 | 2.78  | 98.77 |
| chr7 | 11657981 | 11662269 | 4289  | 0.02 | C_unshiu_00065 | 256162 | 260451 | 4290  | 0.78  | 99.18 |
| chr7 | 11663487 | 11667694 | 4208  | 0.02 | C_unshiu_00065 | 260977 | 265179 | 4203  | 0.76  | 99.26 |
| chr7 | 11668993 | 11681717 | 12725 | 0.05 | C_unshiu_00065 | 265661 | 278433 | 12773 | 2.31  | 98.77 |
| chr7 | 11687452 | 11690586 | 3135  | 0.01 | C_unshiu_01174 | 6512   | 9640   | 3129  | 3.55  | 98.98 |
| chr7 | 11690812 | 11693037 | 2226  | 0.01 | C_unshiu_00065 | 286508 | 288733 | 2226  | 0.4   | 99.82 |
| chr7 | 11693820 | 11700714 | 6895  | 0.03 | C_unshiu_01174 | 11424  | 18321  | 6898  | 7.83  | 99.52 |
| chr7 | 11732077 | 11745461 | 13385 | 0.06 | C_unshiu_00065 | 338577 | 351992 | 13416 | 2.43  | 99.25 |
| chr7 | 11753464 | 11756549 | 3086  | 0.01 | C_unshiu_00065 | 357718 | 360819 | 3102  | 0.56  | 98.39 |
| chr7 | 11763477 | 11764712 | 1236  | 0.01 | C_unshiu_00065 | 364633 | 365869 | 1237  | 0.22  | 99.35 |
| chr7 | 11765325 | 11766412 | 1088  | 0    | C_unshiu_00065 | 368495 | 369571 | 1077  | 0.19  | 98.81 |
| chr7 | 11774354 | 11775543 | 1190  | 0.01 | C_unshiu_00065 | 398576 | 397386 | 1191  | 0.22  | 99.92 |
| chr7 | 11789584 | 11827535 | 37952 | 0.16 | C_unshiu_01216 | 50267  | 12382  | 37886 | 45.08 | 99.72 |
| chr7 | 11829638 | 11831092 | 1455  | 0.01 | C_unshiu_02062 | 26354  | 27809  | 1456  | 3.81  | 98.76 |
| chr7 | 11836743 | 11839106 | 2364  | 0.01 | C_unshiu_02160 | 7446   | 9793   | 2348  | 6.78  | 98.99 |
| chr7 | 11843140 | 11845191 | 2052  | 0.01 | C_unshiu_02062 | 34517  | 36570  | 2054  | 5.37  | 98.69 |
| chr7 | 11845258 | 11846831 | 1574  | 0.01 | C_unshiu_02062 | 36672  | 38243  | 1572  | 4.11  | 99.49 |
| chr7 | 11846841 | 11847917 | 1077  | 0    | C_unshiu_00783 | 114287 | 115364 | 1078  | 0.83  | 98.89 |
| chr7 | 11854393 | 11861746 | 7354  | 0.03 | C_unshiu_00290 | 214386 | 221720 | 7335  | 2.71  | 98.33 |
| chr7 | 11865684 | 11875690 | 10007 | 0.04 | C_unshiu_02160 | 24612  | 34621  | 10010 | 28.91 | 99.33 |
| chr7 | 11885674 | 11893495 | 7822  | 0.03 | C_unshiu_00290 | 238977 | 246850 | 7874  | 2.91  | 98.39 |
| chr7 | 11893498 | 11899518 | 6021  | 0.03 | C_unshiu_00290 | 247086 | 253105 | 6020  | 2.22  | 98.58 |
| chr7 | 11905726 | 11909026 | 3301  | 0.01 | C_unshiu_00290 | 255138 | 258438 | 3301  | 1.22  | 99.7  |
| chr7 | 11909113 | 11914064 | 4952  | 0.02 | C_unshiu_00290 | 258437 | 263380 | 4944  | 1.83  | 98.59 |
| chr7 | 11914064 | 11916587 | 2524  | 0.01 | C_unshiu_00290 | 264356 | 266883 | 2528  | 0.93  | 98.62 |
| chr7 | 11925142 | 11927841 | 2700  | 0.01 | C_unshiu_02243 | 13511  | 16212  | 2702  | 8.45  | 99.37 |
| chr7 | 11944133 | 11955501 | 11369 | 0.05 | C_unshiu_00221 | 1007   | 12320  | 11314 | 3.6   | 98.7  |
| chr7 | 11956438 | 11978886 | 22449 | 0.09 | C_unshiu_00221 | 13852  | 36336  | 22485 | 7.16  | 98.75 |
| chr7 | 11992925 | 12018301 | 25377 | 0.11 | C_unshiu_00221 | 50535  | 76070  | 25536 | 8.13  | 98.4  |
| chr7 | 12024640 | 12027409 | 2770  | 0.01 | C_unshiu_00221 | 82960  | 85732  | 2773  | 0.88  | 99.35 |
| chr7 | 12028890 | 12031532 | 2643  | 0.01 | C_unshiu_00221 | 85724  | 88370  | 2647  | 0.84  | 98.64 |
| chr7 | 12035452 | 12045654 | 10203 | 0.04 | C_unshiu_00221 | 92947  | 103151 | 10205 | 3.25  | 98.31 |
| chr7 | 12049042 | 12058274 | 9233  | 0.04 | C_unshiu_00221 | 104970 | 114219 | 9250  | 2.94  | 98.77 |
| chr7 | 12058839 | 12072342 | 13504 | 0.06 | C_unshiu_00221 | 115128 | 128652 | 13525 | 4.31  | 99.45 |
| chr7 | 12073666 | 12087596 | 13931 | 0.06 | C_unshiu_00221 | 130304 | 144255 | 13952 | 4.44  | 99.63 |
| chr7 | 12091546 | 12096012 | 4467  | 0.02 | C_unshiu_00221 | 147340 | 151824 | 4485  | 1.43  | 98.2  |
| chr7 | 12096607 | 12098136 | 1530  | 0.01 | C_unshiu_00221 | 152962 | 154491 | 1530  | 0.49  | 100   |
| chr7 | 12106200 | 12137832 | 31633 | 0.13 | C_unshiu_00221 | 162851 | 194646 | 31796 | 10.12 | 98.53 |
| chr7 | 12145927 | 12185098 | 39172 | 0.17 | C_unshiu_00221 | 198875 | 238202 | 39328 | 12.52 | 98.5  |
| chr7 | 12185141 | 12216894 | 31754 | 0.13 | C_unshiu_00221 | 238697 | 270455 | 31759 | 10.11 | 98.14 |
| chr7 | 12216889 | 12221866 | 4978  | 0.02 | C_unshiu_00221 | 271168 | 276167 | 5000  | 1.59  | 98.01 |
| chr7 | 12221872 | 12225373 | 3502  | 0.01 | C_unshiu_00221 | 276506 | 280007 | 3502  | 1.11  | 99.94 |
| chr7 | 12225391 | 12227679 | 2289  | 0.01 | C_unshiu_02767 | 7112   | 9414   | 2303  | 12.28 | 98.83 |
| chr7 | 12233763 | 12260215 | 26453 | 0.11 | C_unshiu_01708 | 42259  | 15766  | 26494 | 50.79 | 98.66 |
| chr7 | 12271744 | 12272951 | 1208  | 0.01 | C_unshiu_01926 | 26988  | 28186  | 1199  | 2.73  | 99.17 |
| chr7 | 12271760 | 12272957 | 1198  | 0.01 | C_unshiu_01708 | 4737   | 3537   | 1201  | 2.3   | 98.25 |
| chr7 | 12289436 | 12292387 | 2952  | 0.01 | C_unshiu_01929 | 33380  | 30429  | 2952  | 6.74  | 99.93 |
| chr7 | 12292740 | 12294296 | 1557  | 0.01 | C_unshiu_01929 | 29850  | 28294  | 1557  | 3.56  | 99.61 |
| chr7 | 12297777 | 12299824 | 2048  | 0.01 | C_unshiu_01929 | 25974  | 23925  | 2050  | 4.68  | 99.51 |
| chr7 | 12299281 | 12304320 | 5040  | 0.02 | C_unshiu_01053 | 17694  | 12655  | 5040  | 5.05  | 99.56 |
| chr7 | 12303397 | 12310115 | 6719  | 0.03 | C_unshiu_01929 | 21837  | 15121  | 6717  | 15.35 | 99.64 |
| chr7 | 12311217 | 12312846 | 1630  | 0.01 | C_unshiu_01053 | 7916   | 6287   | 1630  | 1.63  | 99.57 |
| chr7 | 12342516 | 12347760 | 5245  | 0.02 | C_unshiu_02292 | 4993   | 10237  | 5245  | 17.45 | 99.54 |
| chr7 | 12345583 | 12352012 | 6430  | 0.03 | C_unshiu_01692 | 2854   | 9293   | 6440  | 12.19 | 99.08 |
| chr7 | 12354992 | 12356494 | 1503  | 0.01 | C_unshiu_00185 | 330862 | 332364 | 1503  | 0.43  | 100   |
| chr7 | 12358089 | 12360262 | 2174  | 0.01 | C_unshiu_01830 | 2527   | 4700   | 2174  | 4.59  | 99.95 |
| chr7 | 12364518 | 12370475 | 5958  | 0.03 | C_unshiu_01692 | 17372  | 23301  | 5930  | 11.23 | 98.09 |
| chr7 | 12370471 | 12372723 | 2253  | 0.01 | C_unshiu_00944 | 57016  | 59268  | 2253  | 2.01  | 100   |
| chr7 | 12376130 | 12380997 | 4868  | 0.02 | C_unshiu_01078 | 70582  | 75476  | 4895  | 4.99  | 99.06 |
| chr7 | 12381316 | 12382343 | 1028  | 0    | C_unshiu_01034 | 81614  | 82641  | 1028  | 1     | 100   |
| chr7 | 12382336 | 12383568 | 1233  | 0.01 | C_unshiu_01078 | 77402  | 78634  | 1233  | 1.26  | 100   |
| chr7 | 12383819 | 12386706 | 2888  | 0.01 | C_unshiu_01078 | 79307  | 82194  | 2888  | 2.94  | 100   |
| chr7 | 12387836 | 12390284 | 2449  | 0.01 | C_unshiu_01078 | 83809  | 86265  | 2457  | 2.5   | 98.46 |
| chr7 | 12391382 | 12402969 | 11588 | 0.05 | C_unshiu_01078 | 86485  | 98087  | 11603 | 11.83 | 98.57 |
| chr7 | 12399562 | 12410178 | 10617 | 0.04 | C_unshiu_01644 | 11074  | 21730  | 10657 | 19.24 | 98.39 |
| chr7 | 12416485 | 12418599 | 2115  | 0.01 | C_unshiu_01310 | 63287  | 61181  | 2107  | 2.76  | 98.68 |
| chr7 | 12426449 | 12435409 | 8961  | 0.04 | C_unshiu_01958 | 1      | 8949   | 8949  | 21.09 | 99.47 |
| chr7 | 12435479 | 12438278 | 2800  | 0.01 | C_unshiu_01958 | 9460   | 12256  | 2797  | 6.59  | 99.47 |
| chr7 | 12443961 | 12449204 | 5244  | 0.02 | C_unshiu_01958 | 17586  | 22778  | 5193  | 12.24 | 98.48 |
| chr7 | 12449590 | 12469202 | 19613 | 0.08 | C_unshiu_01958 | 22815  | 42436  | 19622 | 46.24 | 99.19 |
| chr7 | 12461356 | 12472919 | 11564 | 0.05 | C_unshiu_00208 | 311228 | 299664 | 11565 | 3.5   | 98.75 |
| chr7 | 12474903 | 12482429 | 7527  | 0.03 | C_unshiu_00208 | 291714 | 284167 | 7548  | 2.29  | 99.02 |
| chr7 | 12504039 | 12506531 | 2493  | 0.01 | C_unshiu_02441 | 21515  | 19019  | 2497  | 9.44  | 99.76 |
| chr7 | 12506544 | 12507896 | 1353  | 0.01 | C_unshiu_02441 | 18763  | 17411  | 1353  | 5.12  | 100   |
| chr7 | 12508050 | 12509485 | 1436  | 0.01 | C_unshiu_00208 | 259537 | 258102 | 1436  | 0.43  | 100   |
| chr7 | 12509498 | 12511490 | 1993  | 0.01 | C_unshiu_02441 | 15560  | 13568  | 1993  | 7.54  | 99.6  |
| chr7 | 12511890 | 12514718 | 2829  | 0.01 | C_unshiu_02441 | 12806  | 9969   | 2838  | 10.73 | 98.17 |

|      |          |          |       |      |                |        |        |       |       |       |
|------|----------|----------|-------|------|----------------|--------|--------|-------|-------|-------|
| chr7 | 12521757 | 12526628 | 4872  | 0.02 | C_unshiu_00208 | 246893 | 242001 | 4893  | 1.48  | 98.28 |
| chr7 | 12535828 | 12545498 | 9671  | 0.04 | C_unshiu_00208 | 234828 | 225133 | 9696  | 2.94  | 99.22 |
| chr7 | 12555018 | 12566467 | 11450 | 0.05 | C_unshiu_00208 | 215265 | 203841 | 11425 | 3.46  | 98.63 |
| chr7 | 12567339 | 12583390 | 16052 | 0.07 | C_unshiu_00208 | 203417 | 187388 | 16030 | 4.85  | 98.42 |
| chr7 | 12594198 | 12595967 | 1770  | 0.01 | C_unshiu_00208 | 178331 | 176562 | 1770  | 0.54  | 100   |
| chr7 | 12596415 | 12597815 | 1401  | 0.01 | C_unshiu_00208 | 179176 | 177778 | 1399  | 0.42  | 99.36 |
| chr7 | 12597936 | 12603531 | 5596  | 0.02 | C_unshiu_00208 | 173999 | 168405 | 5595  | 1.69  | 99.91 |
| chr7 | 12603637 | 12606103 | 2467  | 0.01 | C_unshiu_00208 | 168280 | 165814 | 2467  | 0.75  | 99.92 |
| chr7 | 12606699 | 12607912 | 1214  | 0.01 | C_unshiu_00208 | 165327 | 164113 | 1215  | 0.37  | 99.42 |
| chr7 | 12608903 | 12610251 | 1349  | 0.01 | C_unshiu_00208 | 160252 | 158904 | 1349  | 0.41  | 100   |
| chr7 | 12617528 | 12620428 | 2901  | 0.01 | C_unshiu_00208 | 124592 | 121639 | 2954  | 0.89  | 98    |
| chr7 | 12622205 | 12624297 | 2093  | 0.01 | C_unshiu_00208 | 119860 | 117768 | 2093  | 0.63  | 100   |
| chr7 | 12624671 | 12626528 | 1858  | 0.01 | C_unshiu_00208 | 117480 | 115617 | 1864  | 0.56  | 98.29 |
| chr7 | 12626631 | 12629286 | 2656  | 0.01 | C_unshiu_00496 | 28385  | 25706  | 2680  | 1.39  | 98.73 |
| chr7 | 12629813 | 12631261 | 1449  | 0.01 | C_unshiu_00496 | 24870  | 23420  | 1451  | 0.75  | 99.86 |
| chr7 | 12643673 | 12647757 | 4085  | 0.02 | C_unshiu_00496 | 10093  | 6019   | 4075  | 2.12  | 98.29 |
| chr7 | 12646855 | 12648444 | 1590  | 0.01 | C_unshiu_00165 | 204781 | 203192 | 1590  | 0.43  | 99.69 |
| chr7 | 12649165 | 12654035 | 4871  | 0.02 | C_unshiu_00496 | 4897   | 1      | 4897  | 2.55  | 98.02 |
| chr7 | 12656113 | 12662640 | 6528  | 0.03 | C_unshiu_00165 | 195331 | 188788 | 6544  | 1.77  | 98.37 |
| chr7 | 12678247 | 12691952 | 13706 | 0.06 | C_unshiu_00165 | 166815 | 153133 | 13683 | 3.7   | 98.07 |
| chr7 | 12694769 | 12701248 | 6480  | 0.03 | C_unshiu_00165 | 153136 | 146658 | 6479  | 1.75  | 99.4  |
| chr7 | 12716972 | 12731496 | 14525 | 0.06 | C_unshiu_00165 | 130334 | 115692 | 14643 | 3.96  | 98.05 |
| chr7 | 12731492 | 12735963 | 4472  | 0.02 | C_unshiu_00165 | 115420 | 110938 | 4483  | 1.21  | 98.93 |
| chr7 | 12744385 | 12764930 | 20546 | 0.09 | C_unshiu_00165 | 104433 | 83745  | 20689 | 5.59  | 98.17 |
| chr7 | 12765952 | 12773410 | 7459  | 0.03 | C_unshiu_00165 | 83753  | 76307  | 7447  | 2.01  | 99.53 |
| chr7 | 12804416 | 12806002 | 1587  | 0.01 | C_unshiu_00866 | 62100  | 60510  | 1591  | 1.32  | 99.18 |
| chr7 | 12813264 | 12827180 | 13917 | 0.06 | C_unshiu_00866 | 54781  | 40823  | 13959 | 11.55 | 98.85 |
| chr7 | 12827906 | 12832620 | 4715  | 0.02 | C_unshiu_00866 | 40831  | 36144  | 4688  | 3.88  | 98.29 |
| chr7 | 12835316 | 12855110 | 19795 | 0.08 | C_unshiu_00866 | 28690  | 8860   | 19831 | 16.41 | 98.62 |
| chr7 | 12846437 | 12857574 | 11138 | 0.05 | C_unshiu_00975 | 3666   | 14856  | 11191 | 10.28 | 98.32 |
| chr7 | 12860146 | 12883845 | 23700 | 0.1  | C_unshiu_00975 | 17002  | 40788  | 23787 | 21.84 | 98.88 |
| chr7 | 12885649 | 12893444 | 7796  | 0.03 | C_unshiu_00975 | 42035  | 49835  | 7801  | 7.16  | 99.08 |
| chr7 | 12895878 | 12906725 | 10848 | 0.05 | C_unshiu_00975 | 53775  | 64681  | 10907 | 10.01 | 98.97 |
| chr7 | 12933514 | 12934663 | 1150  | 0    | C_unshiu_02258 | 1      | 1138   | 1138  | 3.64  | 98    |
| chr7 | 12934702 | 12938433 | 3732  | 0.02 | C_unshiu_01404 | 34371  | 38069  | 3699  | 5.27  | 98.16 |
| chr7 | 12938456 | 12943374 | 4919  | 0.02 | C_unshiu_02258 | 3268   | 8161   | 4894  | 15.65 | 98.25 |
| chr7 | 12946196 | 12961393 | 15198 | 0.06 | C_unshiu_01404 | 44431  | 59622  | 15192 | 21.64 | 99.86 |
| chr7 | 12965165 | 12972687 | 7523  | 0.03 | C_unshiu_01404 | 62699  | 70217  | 7519  | 10.71 | 99.87 |
| chr7 | 12980386 | 12985802 | 5417  | 0.02 | C_unshiu_01768 | 32258  | 37625  | 5368  | 10.79 | 98.98 |
| chr7 | 12990446 | 12998004 | 7559  | 0.03 | C_unshiu_01768 | 41521  | 49029  | 7509  | 15.09 | 98.3  |
| chr7 | 13006298 | 13015078 | 8781  | 0.04 | C_unshiu_01154 | 11955  | 3229   | 8727  | 9.69  | 98.36 |
| chr7 | 13015094 | 13016821 | 1728  | 0.01 | C_unshiu_01154 | 2536   | 809    | 1728  | 1.92  | 99.94 |
| chr7 | 13017736 | 13021568 | 3833  | 0.02 | C_unshiu_00087 | 180526 | 184331 | 3806  | 0.81  | 98.57 |
| chr7 | 13022327 | 13024022 | 1696  | 0.01 | C_unshiu_00087 | 185474 | 187173 | 1700  | 0.36  | 99.53 |
| chr7 | 13024629 | 13077842 | 53214 | 0.22 | C_unshiu_00087 | 187947 | 241132 | 53186 | 11.3  | 99.93 |
| chr7 | 13057858 | 13085406 | 27549 | 0.12 | C_unshiu_00087 | 221167 | 248696 | 27530 | 5.85  | 99.92 |
| chr7 | 13085279 | 13127205 | 41927 | 0.18 | C_unshiu_00087 | 248801 | 290750 | 41950 | 8.91  | 99.8  |
| chr7 | 13127199 | 13129042 | 1844  | 0.01 | C_unshiu_00308 | 171721 | 169878 | 1844  | 0.7   | 100   |
| chr7 | 13135929 | 13149055 | 13127 | 0.06 | C_unshiu_00087 | 299990 | 313125 | 13136 | 2.79  | 99.91 |
| chr7 | 13149321 | 13163141 | 13821 | 0.06 | C_unshiu_00087 | 313609 | 327328 | 13720 | 2.91  | 98.89 |
| chr7 | 13164507 | 13177409 | 12903 | 0.05 | C_unshiu_00087 | 329211 | 342142 | 12932 | 2.75  | 99.71 |
| chr7 | 13182644 | 13204054 | 21411 | 0.09 | C_unshiu_00087 | 346639 | 368067 | 21429 | 4.55  | 99.6  |
| chr7 | 13205632 | 13210402 | 4771  | 0.02 | C_unshiu_00087 | 370006 | 374777 | 4772  | 1.01  | 99.98 |
| chr7 | 13211915 | 13273095 | 61181 | 0.26 | C_unshiu_00087 | 375350 | 436546 | 61197 | 13    | 99.95 |
| chr7 | 13275303 | 13278872 | 3570  | 0.02 | C_unshiu_00687 | 124249 | 120680 | 3570  | 2.43  | 99.75 |
| chr7 | 13279255 | 13288972 | 9718  | 0.04 | C_unshiu_00687 | 120120 | 110408 | 9713  | 6.62  | 99.26 |
| chr7 | 13289291 | 13308291 | 19001 | 0.08 | C_unshiu_01886 | 19863  | 831    | 19033 | 42.15 | 98.98 |
| chr7 | 13319642 | 13325502 | 5861  | 0.02 | C_unshiu_00687 | 97497  | 91620  | 5878  | 4.01  | 98.37 |
| chr7 | 13325617 | 13328467 | 2851  | 0.01 | C_unshiu_00687 | 91327  | 88470  | 2858  | 1.95  | 99.27 |
| chr7 | 13330092 | 13338328 | 8237  | 0.03 | C_unshiu_00687 | 87938  | 79689  | 8250  | 5.62  | 99.38 |
| chr7 | 13337990 | 13342445 | 4456  | 0.02 | C_unshiu_00687 | 79682  | 75228  | 4455  | 3.04  | 99.91 |
| chr7 | 13352912 | 13354470 | 1559  | 0.01 | C_unshiu_00687 | 67081  | 65522  | 1560  | 1.06  | 99.94 |
| chr7 | 13357826 | 13363899 | 6074  | 0.03 | C_unshiu_00131 | 1      | 6076   | 6076  | 1.47  | 99.11 |
| chr7 | 13368928 | 13375443 | 6516  | 0.03 | C_unshiu_00131 | 11772  | 18326  | 6555  | 1.59  | 98.14 |
| chr7 | 13377937 | 13380413 | 2477  | 0.01 | C_unshiu_00131 | 19541  | 22017  | 2477  | 0.6   | 100   |
| chr7 | 13381928 | 13387079 | 5152  | 0.02 | C_unshiu_00346 | 30     | 5181   | 5152  | 2.08  | 100   |
| chr7 | 13387555 | 13389627 | 2073  | 0.01 | C_unshiu_00131 | 21938  | 24009  | 2072  | 0.5   | 99.37 |
| chr7 | 13395123 | 13396762 | 1640  | 0.01 | C_unshiu_00346 | 12897  | 14535  | 1639  | 0.66  | 99.94 |
| chr7 | 13398711 | 13419422 | 20712 | 0.09 | C_unshiu_00346 | 16338  | 37079  | 20742 | 8.38  | 99.38 |
| chr7 | 13419480 | 13429608 | 10129 | 0.04 | C_unshiu_00346 | 37078  | 47224  | 10147 | 4.1   | 99.08 |
| chr7 | 13439062 | 13453473 | 14412 | 0.06 | C_unshiu_00346 | 54433  | 68851  | 14419 | 5.82  | 99.75 |
| chr7 | 13453608 | 13463606 | 9999  | 0.04 | C_unshiu_00346 | 68875  | 78876  | 10002 | 4.04  | 99.92 |
| chr7 | 13464972 | 13475837 | 10866 | 0.05 | C_unshiu_00346 | 80900  | 91842  | 10943 | 4.42  | 99.18 |
| chr7 | 13475830 | 13476931 | 1102  | 0    | C_unshiu_00598 | 64407  | 63306  | 1102  | 0.66  | 100   |
| chr7 | 13476990 | 13507907 | 30918 | 0.13 | C_unshiu_00346 | 93288  | 124202 | 30915 | 12.48 | 99.84 |
| chr7 | 13508006 | 13522714 | 14709 | 0.06 | C_unshiu_00346 | 124521 | 139238 | 14718 | 5.94  | 99.31 |
| chr7 | 13537841 | 13539547 | 1707  | 0.01 | C_unshiu_00249 | 43538  | 45251  | 1714  | 0.58  | 99.18 |
| chr7 | 13539867 | 13545967 | 6101  | 0.03 | C_unshiu_00249 | 36017  | 42129  | 6113  | 2.07  | 98.08 |
| chr7 | 13545977 | 13547384 | 1408  | 0.01 | C_unshiu_00249 | 42486  | 43893  | 1408  | 0.48  | 99.08 |

|      |          |          |       |      |                |        |        |       |       |       |
|------|----------|----------|-------|------|----------------|--------|--------|-------|-------|-------|
| chr7 | 13548892 | 13555138 | 6247  | 0.03 | C_unshiu_00249 | 45350  | 51628  | 6279  | 2.12  | 98.65 |
| chr7 | 13562611 | 13566802 | 4192  | 0.02 | C_unshiu_01734 | 3875   | 8066   | 4192  | 8.17  | 99.86 |
| chr7 | 13568982 | 13573047 | 4066  | 0.02 | C_unshiu_01734 | 10798  | 14863  | 4066  | 7.92  | 99.9  |
| chr7 | 13573186 | 13576244 | 3059  | 0.01 | C_unshiu_01734 | 15643  | 18705  | 3063  | 5.97  | 99.18 |
| chr7 | 13586360 | 13592807 | 6448  | 0.03 | C_unshiu_00249 | 83063  | 89511  | 6449  | 2.18  | 99.61 |
| chr7 | 13601610 | 13603165 | 1556  | 0.01 | C_unshiu_00582 | 18986  | 17431  | 1556  | 0.91  | 100   |
| chr7 | 13603164 | 13604557 | 1394  | 0.01 | C_unshiu_00582 | 17197  | 15816  | 1382  | 0.81  | 98.85 |
| chr7 | 13604748 | 13609798 | 5051  | 0.02 | C_unshiu_00582 | 15544  | 10495  | 5050  | 2.95  | 99.86 |
| chr7 | 13609821 | 13612251 | 2431  | 0.01 | C_unshiu_01734 | 21079  | 23509  | 2431  | 4.74  | 98.4  |
| chr7 | 13612256 | 13622227 | 9972  | 0.04 | C_unshiu_01734 | 23640  | 33620  | 9981  | 19.45 | 98.54 |
| chr7 | 13622480 | 13631340 | 8861  | 0.04 | C_unshiu_01734 | 33713  | 42572  | 8860  | 17.27 | 99.16 |
| chr7 | 13632310 | 13638048 | 5739  | 0.02 | C_unshiu_01734 | 44189  | 49909  | 5721  | 11.15 | 98.31 |
| chr7 | 13634477 | 13643198 | 8722  | 0.04 | C_unshiu_01717 | 9535   | 18282  | 8748  | 16.86 | 98.94 |
| chr7 | 13649533 | 13662221 | 12689 | 0.05 | C_unshiu_01717 | 21712  | 34401  | 12690 | 24.46 | 99.02 |
| chr7 | 13662344 | 13668672 | 6329  | 0.03 | C_unshiu_01717 | 34403  | 40745  | 6343  | 12.23 | 98.13 |
| chr7 | 13666989 | 13681955 | 14967 | 0.06 | C_unshiu_00404 | 1      | 14936  | 14936 | 6.73  | 99.23 |
| chr7 | 13692069 | 13702648 | 10580 | 0.04 | C_unshiu_00404 | 22072  | 32730  | 10659 | 4.8   | 98.34 |
| chr7 | 13735158 | 13742169 | 7012  | 0.03 | C_unshiu_00404 | 62856  | 69894  | 7039  | 3.17  | 98.79 |
| chr7 | 13747934 | 13752454 | 4521  | 0.02 | C_unshiu_00404 | 69990  | 74522  | 4533  | 2.04  | 98.72 |
| chr7 | 13756217 | 13773181 | 16965 | 0.07 | C_unshiu_00404 | 88342  | 105343 | 17002 | 7.66  | 99.06 |
| chr7 | 13773189 | 13775884 | 2696  | 0.01 | C_unshiu_00404 | 105076 | 107771 | 2696  | 1.21  | 100   |
| chr7 | 13800220 | 13810779 | 10560 | 0.04 | C_unshiu_00404 | 125522 | 136083 | 10562 | 4.76  | 98.57 |
| chr7 | 13844058 | 13855447 | 11390 | 0.05 | C_unshiu_00404 | 150207 | 161590 | 11384 | 5.13  | 98.89 |
| chr7 | 13875634 | 13880689 | 5056  | 0.02 | C_unshiu_00404 | 180609 | 185662 | 5054  | 2.28  | 99.96 |
| chr7 | 13887718 | 13889091 | 1374  | 0.01 | C_unshiu_00404 | 192404 | 193763 | 1360  | 0.61  | 98.4  |
| chr7 | 13897319 | 13898441 | 1123  | 0    | C_unshiu_01372 | 34317  | 33195  | 1123  | 1.54  | 100   |
| chr7 | 13930717 | 13932721 | 2005  | 0.01 | C_unshiu_01240 | 1      | 1997   | 1997  | 2.44  | 98.9  |
| chr7 | 13932958 | 13943203 | 10246 | 0.04 | C_unshiu_01240 | 2438   | 12707  | 10270 | 12.57 | 98.63 |
| chr7 | 13948728 | 13954218 | 5491  | 0.02 | C_unshiu_01362 | 27316  | 32819  | 5504  | 7.5   | 99.33 |
| chr7 | 13962187 | 13974807 | 12621 | 0.05 | C_unshiu_01362 | 42420  | 55049  | 12630 | 17.2  | 98.92 |
| chr7 | 14005482 | 14020226 | 14745 | 0.06 | C_unshiu_00823 | 82736  | 67965  | 14772 | 11.71 | 98.26 |
| chr7 | 14020220 | 14022011 | 1792  | 0.01 | C_unshiu_00823 | 66517  | 64724  | 1794  | 1.42  | 98.05 |
| chr7 | 14023893 | 14028609 | 4717  | 0.02 | C_unshiu_01925 | 22875  | 18159  | 4717  | 10.75 | 100   |
| chr7 | 14028966 | 14038947 | 9982  | 0.04 | C_unshiu_01925 | 17748  | 7786   | 9963  | 22.71 | 99.73 |
| chr7 | 14039046 | 14041012 | 1967  | 0.01 | C_unshiu_00823 | 51774  | 49808  | 1967  | 1.56  | 100   |
| chr7 | 14041020 | 14047633 | 6614  | 0.03 | C_unshiu_00823 | 49064  | 42468  | 6597  | 5.23  | 98.05 |
| chr7 | 14049272 | 14056942 | 7671  | 0.03 | C_unshiu_00823 | 41705  | 34023  | 7683  | 6.09  | 98.95 |
| chr7 | 14059902 | 14065337 | 5436  | 0.02 | C_unshiu_00823 | 31942  | 26505  | 5438  | 4.31  | 99.85 |
| chr7 | 14069908 | 14072681 | 2774  | 0.01 | C_unshiu_01682 | 44816  | 42030  | 2787  | 5.23  | 98.92 |
| chr7 | 14076299 | 14082524 | 6226  | 0.03 | C_unshiu_01682 | 41472  | 35246  | 6227  | 11.68 | 99.98 |
| chr7 | 14083846 | 14091484 | 7639  | 0.03 | C_unshiu_01682 | 34706  | 27021  | 7686  | 14.42 | 98.09 |
| chr7 | 14092230 | 14093821 | 1592  | 0.01 | C_unshiu_01669 | 33453  | 31862  | 1592  | 2.94  | 100   |
| chr7 | 14106493 | 14118841 | 12349 | 0.05 | C_unshiu_01682 | 18433  | 6076   | 12358 | 23.18 | 98.36 |
| chr7 | 14118841 | 14122735 | 3895  | 0.02 | C_unshiu_01682 | 5872   | 1976   | 3897  | 7.31  | 99.56 |
| chr7 | 14127088 | 14129675 | 2588  | 0.01 | C_unshiu_00266 | 127889 | 125302 | 2588  | 0.91  | 100   |
| chr7 | 14135911 | 14144436 | 8526  | 0.04 | C_unshiu_02468 | 16995  | 25512  | 8518  | 33.37 | 99.24 |
| chr7 | 14163699 | 14174791 | 11093 | 0.05 | C_unshiu_01008 | 18811  | 7720   | 11092 | 10.56 | 99.45 |
| chr7 | 14176319 | 14178742 | 2424  | 0.01 | C_unshiu_00451 | 23794  | 26232  | 2439  | 1.18  | 98.93 |
| chr7 | 14178787 | 14196740 | 17954 | 0.08 | C_unshiu_00451 | 26551  | 44505  | 17955 | 8.67  | 98.76 |
| chr7 | 14197076 | 14215083 | 18008 | 0.08 | C_unshiu_00451 | 45022  | 62905  | 17884 | 8.63  | 98.12 |
| chr7 | 14220738 | 14248147 | 27410 | 0.12 | C_unshiu_00451 | 70311  | 97730  | 27420 | 13.24 | 99.79 |
| chr7 | 14251838 | 14257617 | 5780  | 0.02 | C_unshiu_00451 | 102180 | 107988 | 5809  | 2.8   | 99.04 |
| chr7 | 14268076 | 14270831 | 2756  | 0.01 | C_unshiu_00451 | 125046 | 127819 | 2774  | 1.34  | 98.38 |
| chr7 | 14277372 | 14283910 | 6539  | 0.03 | C_unshiu_00451 | 136216 | 142767 | 6552  | 3.16  | 98.95 |
| chr7 | 14291849 | 14327704 | 35856 | 0.15 | C_unshiu_00451 | 151596 | 187527 | 35932 | 17.35 | 98.97 |
| chr7 | 14334915 | 14346117 | 11203 | 0.05 | C_unshiu_00451 | 194065 | 205276 | 11212 | 5.41  | 98.45 |
| chr7 | 14375625 | 14398549 | 22925 | 0.1  | C_unshiu_02359 | 28111  | 5207   | 22905 | 81.48 | 99.36 |
| chr7 | 14398864 | 14403602 | 4739  | 0.02 | C_unshiu_01130 | 24036  | 19298  | 4739  | 5.12  | 100   |
| chr7 | 14423285 | 14431456 | 8172  | 0.03 | C_unshiu_02052 | 2870   | 11037  | 8168  | 21.24 | 99.17 |
| chr7 | 14434093 | 14437215 | 3123  | 0.01 | C_unshiu_01754 | 46994  | 43872  | 3123  | 6.21  | 98.75 |
| chr7 | 14443509 | 14450213 | 6705  | 0.03 | C_unshiu_01754 | 37912  | 31207  | 6706  | 13.33 | 99.61 |
| chr7 | 14450978 | 14454991 | 4014  | 0.02 | C_unshiu_02052 | 28308  | 32320  | 4013  | 10.44 | 99.5  |
| chr7 | 14456209 | 14457517 | 1309  | 0.01 | C_unshiu_01754 | 25594  | 24286  | 1309  | 2.6   | 100   |
| chr7 | 14457538 | 14463025 | 5488  | 0.02 | C_unshiu_01754 | 23664  | 18170  | 5495  | 10.93 | 99.07 |
| chr7 | 14464903 | 14468730 | 3828  | 0.02 | C_unshiu_01754 | 17867  | 14043  | 3825  | 7.61  | 98.88 |
| chr7 | 14469857 | 14473099 | 3243  | 0.01 | C_unshiu_01754 | 12794  | 9552   | 3243  | 6.45  | 99.97 |
| chr7 | 14478099 | 14482952 | 4854  | 0.02 | C_unshiu_01754 | 4934   | 84     | 4851  | 9.65  | 99.94 |
| chr7 | 14482974 | 14485318 | 2345  | 0.01 | C_unshiu_01658 | 41635  | 39304  | 2332  | 4.26  | 98.42 |
| chr7 | 14504542 | 14513907 | 9366  | 0.04 | C_unshiu_00989 | 97322  | 106655 | 9334  | 8.66  | 98.81 |
| chr7 | 14516720 | 14519826 | 3107  | 0.01 | C_unshiu_01480 | 13734  | 16840  | 3107  | 4.82  | 100   |
| chr7 | 14521506 | 14522878 | 1373  | 0.01 | C_unshiu_01480 | 19192  | 20565  | 1374  | 2.13  | 99.2  |
| chr7 | 14526435 | 14528238 | 1804  | 0.01 | C_unshiu_01362 | 57413  | 59222  | 1810  | 2.46  | 98.95 |
| chr7 | 14529965 | 14538236 | 8272  | 0.03 | C_unshiu_01362 | 59512  | 67783  | 8272  | 11.27 | 99.66 |
| chr7 | 14538914 | 14541402 | 2489  | 0.01 | C_unshiu_01362 | 68335  | 70825  | 2491  | 3.39  | 99.24 |
| chr7 | 14543922 | 14545165 | 1244  | 0.01 | C_unshiu_01362 | 72187  | 73429  | 1243  | 1.69  | 99.6  |
| chr7 | 14548128 | 14563024 | 14897 | 0.06 | C_unshiu_01330 | 75148  | 60231  | 14918 | 19.84 | 98.69 |
| chr7 | 14565137 | 14568386 | 3250  | 0.01 | C_unshiu_01799 | 48499  | 45247  | 3253  | 6.71  | 98.25 |
| chr7 | 14588061 | 14598143 | 10083 | 0.04 | C_unshiu_01799 | 25418  | 15335  | 10084 | 20.79 | 99.9  |
| chr7 | 14598690 | 14600660 | 1971  | 0.01 | C_unshiu_01799 | 27943  | 25973  | 1971  | 4.06  | 99.64 |

|      |          |          |       |      |                |         |         |       |       |       |
|------|----------|----------|-------|------|----------------|---------|---------|-------|-------|-------|
| chr7 | 14601259 | 14606480 | 5222  | 0.02 | C_unshiu_01799 | 14621   | 9378    | 5244  | 10.81 | 98.21 |
| chr7 | 14607358 | 14609316 | 1959  | 0.01 | C_unshiu_01799 | 8387    | 6415    | 1973  | 4.07  | 98.33 |
| chr7 | 14609316 | 14615513 | 6198  | 0.03 | C_unshiu_01799 | 6206    | 1       | 6206  | 12.8  | 99.55 |
| chr7 | 14614843 | 14621116 | 6274  | 0.03 | C_unshiu_01330 | 33886   | 27551   | 6336  | 8.42  | 98.06 |
| chr7 | 14621108 | 14624172 | 3065  | 0.01 | C_unshiu_01330 | 26867   | 23796   | 3072  | 4.08  | 98.05 |
| chr7 | 14624156 | 14631713 | 7558  | 0.03 | C_unshiu_01330 | 23507   | 15958   | 7550  | 10.04 | 98.52 |
| chr7 | 14633332 | 14648465 | 15134 | 0.06 | C_unshiu_01330 | 15224   | 27      | 15198 | 20.21 | 98.46 |
| chr7 | 14648290 | 14664310 | 16021 | 0.07 | C_unshiu_01501 | 16031   | 1       | 16031 | 25.35 | 98.41 |
| chr7 | 14657430 | 14667001 | 9572  | 0.04 | C_unshiu_01501 | 24881   | 34464   | 9584  | 15.16 | 98.79 |
| chr7 | 14667101 | 14679686 | 12586 | 0.05 | C_unshiu_01501 | 34390   | 47005   | 12616 | 19.95 | 99.44 |
| chr7 | 14679856 | 14682534 | 2679  | 0.01 | C_unshiu_01501 | 47370   | 50052   | 2683  | 4.24  | 99.4  |
| chr7 | 14685660 | 14687649 | 1990  | 0.01 | C_unshiu_01309 | 72429   | 70440   | 1990  | 2.61  | 99.9  |
| chr7 | 14693458 | 14694904 | 1447  | 0.01 | C_unshiu_01309 | 65112   | 63666   | 1447  | 1.9   | 100   |
| chr7 | 14695194 | 14697378 | 2185  | 0.01 | C_unshiu_01309 | 62861   | 60677   | 2185  | 2.87  | 100   |
| chr7 | 14700250 | 14715252 | 15003 | 0.06 | C_unshiu_01309 | 58255   | 43236   | 15020 | 19.7  | 99.32 |
| chr7 | 14715958 | 14721400 | 5443  | 0.02 | C_unshiu_01149 | 88248   | 82806   | 5443  | 5.99  | 100   |
| chr7 | 14728622 | 14730997 | 2376  | 0.01 | C_unshiu_01149 | 75174   | 72800   | 2375  | 2.61  | 99.54 |
| chr7 | 14731524 | 14733170 | 1647  | 0.01 | C_unshiu_01149 | 71347   | 69702   | 1646  | 1.81  | 99.7  |
| chr7 | 14744611 | 14746060 | 1450  | 0.01 | C_unshiu_01149 | 48477   | 47006   | 1472  | 1.62  | 98.44 |
| chr7 | 14750821 | 14751877 | 1057  | 0    | C_unshiu_01149 | 45245   | 44181   | 1065  | 1.17  | 98.97 |
| chr7 | 14754009 | 14769433 | 15425 | 0.06 | C_unshiu_01149 | 41876   | 26518   | 15359 | 16.89 | 99.02 |
| chr7 | 14772710 | 14787986 | 15277 | 0.06 | C_unshiu_01253 | 37885   | 22589   | 15297 | 18.96 | 99.86 |
| chr7 | 14789070 | 14800443 | 11374 | 0.05 | C_unshiu_01253 | 22047   | 10653   | 11395 | 14.12 | 98.37 |
| chr7 | 14802598 | 14806062 | 3465  | 0.01 | C_unshiu_00586 | 17916   | 21390   | 3475  | 2.04  | 98.59 |
| chr7 | 14802598 | 14806062 | 3465  | 0.01 | C_unshiu_01253 | 9108    | 5637    | 3472  | 4.3   | 99.05 |
| chr7 | 14809556 | 14813733 | 4178  | 0.02 | C_unshiu_00586 | 21390   | 25571   | 4182  | 2.45  | 99.04 |
| chr7 | 14814294 | 14817560 | 3267  | 0.01 | C_unshiu_01253 | 3246    | 1       | 3246  | 4.02  | 99.11 |
| chr7 | 14826525 | 14831377 | 4853  | 0.02 | C_unshiu_00586 | 33925   | 38814   | 4890  | 2.87  | 98.16 |
| chr7 | 14842896 | 14856364 | 13469 | 0.06 | C_unshiu_00586 | 60345   | 73941   | 13597 | 7.98  | 98.41 |
| chr7 | 14861248 | 14868666 | 7419  | 0.03 | C_unshiu_01776 | 1       | 7472    | 7472  | 15.12 | 98.24 |
| chr7 | 14868718 | 14873108 | 4391  | 0.02 | C_unshiu_01776 | 7772    | 12163   | 4392  | 8.89  | 99.8  |
| chr7 | 14886771 | 14888471 | 1701  | 0.01 | C_unshiu_01401 | 26228   | 27929   | 1702  | 2.42  | 99.18 |
| chr7 | 14888548 | 14891778 | 3231  | 0.01 | C_unshiu_01401 | 28017   | 31250   | 3234  | 4.59  | 99.63 |
| chr7 | 14900239 | 14901779 | 1541  | 0.01 | C_unshiu_01401 | 37307   | 38848   | 1542  | 2.19  | 99.61 |
| chr7 | 14908348 | 14911055 | 2708  | 0.01 | C_unshiu_01401 | 46669   | 49379   | 2711  | 3.85  | 99.45 |
| chr7 | 14931354 | 14937841 | 6488  | 0.03 | C_unshiu_02586 | 1       | 6452    | 6452  | 28.72 | 99.21 |
| chr7 | 14938431 | 14940198 | 1768  | 0.01 | C_unshiu_00015 | 56924   | 58691   | 1768  | 0.2   | 98.08 |
| chr7 | 14941153 | 14943143 | 1991  | 0.01 | C_unshiu_02586 | 15866   | 13883   | 1984  | 8.83  | 98    |
| chr7 | 14945856 | 14948040 | 2185  | 0.01 | C_unshiu_01513 | 54935   | 57119   | 2185  | 3.5   | 99.95 |
| chr7 | 14948240 | 14949749 | 1510  | 0.01 | C_unshiu_01513 | 57646   | 59155   | 1510  | 2.42  | 99.54 |
| chr7 | 14949866 | 14953055 | 3190  | 0.01 | C_unshiu_01513 | 59284   | 62474   | 3191  | 5.11  | 99.87 |
| chr7 | 14955034 | 14956897 | 1864  | 0.01 | C_unshiu_00387 | 99835   | 97972   | 1864  | 0.82  | 98.77 |
| chr7 | 14956982 | 14960654 | 3673  | 0.02 | C_unshiu_00387 | 97805   | 94134   | 3672  | 1.62  | 99.65 |
| chr7 | 14962389 | 14964691 | 2303  | 0.01 | C_unshiu_00387 | 91958   | 89645   | 2314  | 1.02  | 98.49 |
| chr7 | 14969153 | 14970576 | 1424  | 0.01 | C_unshiu_00162 | 347644  | 349067  | 1424  | 0.38  | 99.93 |
| chr7 | 14969153 | 14970576 | 1424  | 0.01 | C_unshiu_00250 | 98124   | 99551   | 1428  | 0.48  | 99.65 |
| chr7 | 14971956 | 14976722 | 4767  | 0.02 | C_unshiu_01194 | 17701   | 12935   | 4767  | 5.53  | 99.71 |
| chr7 | 14976869 | 14978154 | 1286  | 0.01 | C_unshiu_01194 | 11691   | 10406   | 1286  | 1.49  | 100   |
| chr7 | 14981163 | 14983328 | 2166  | 0.01 | C_unshiu_01194 | 4550    | 2385    | 2166  | 2.51  | 99.82 |
| chr7 | 14986313 | 14989708 | 3396  | 0.01 | C_unshiu_01069 | 43692   | 47087   | 3396  | 3.44  | 100   |
| chr7 | 15000194 | 15001960 | 1767  | 0.01 | C_unshiu_00766 | 26590   | 24824   | 1767  | 1.32  | 99.89 |
| chr7 | 15002882 | 15008442 | 5561  | 0.02 | C_unshiu_00766 | 19866   | 14336   | 5531  | 4.14  | 99.41 |
| chr7 | 15009206 | 15011664 | 2459  | 0.01 | C_unshiu_00766 | 13606   | 11148   | 2459  | 1.84  | 100   |
| chr7 | 15015523 | 15022638 | 7116  | 0.03 | C_unshiu_00766 | 7368    | 253     | 7116  | 5.33  | 99.89 |
| chr7 | 15025804 | 15031718 | 5915  | 0.02 | C_unshiu_00387 | 29486   | 23593   | 5894  | 2.61  | 99.58 |
| chr7 | 15032888 | 15033905 | 1018  | 0    | C_unshiu_00387 | 22471   | 21454   | 1018  | 0.45  | 99.8  |
| chr7 | 15041747 | 15043874 | 2128  | 0.01 | C_unshiu_00387 | 12964   | 10841   | 2124  | 0.94  | 98.07 |
| chr7 | 15044972 | 15047813 | 2842  | 0.01 | C_unshiu_00387 | 12961   | 10117   | 2845  | 1.26  | 99.58 |
| chr7 | 15047829 | 15049815 | 1987  | 0.01 | C_unshiu_00387 | 8903    | 6918    | 1986  | 0.88  | 99.85 |
| chr7 | 15047928 | 15051557 | 3630  | 0.02 | C_unshiu_00387 | 41568   | 37927   | 3642  | 1.61  | 99.51 |
| chr7 | 15065520 | 15096784 | 31265 | 0.13 | C_unshiu_00877 | 709     | 32049   | 31341 | 26.23 | 98.92 |
| chr7 | 15099360 | 15131064 | 31705 | 0.13 | C_unshiu_00877 | 34131   | 65789   | 31659 | 26.49 | 99.35 |
| chr7 | 15131225 | 15132783 | 1559  | 0.01 | C_unshiu_00877 | 66257   | 67818   | 1562  | 1.31  | 99.36 |
| chr7 | 15132801 | 15137674 | 4874  | 0.02 | C_unshiu_00877 | 73541   | 78447   | 4907  | 4.11  | 98.39 |
| chr7 | 15138241 | 15139502 | 1262  | 0.01 | C_unshiu_00877 | 78764   | 80025   | 1262  | 1.06  | 99.92 |
| chr7 | 15141390 | 15144775 | 3386  | 0.01 | C_unshiu_00877 | 82399   | 85783   | 3385  | 2.83  | 98.2  |
| chr7 | 15151237 | 15156661 | 5425  | 0.02 | C_unshiu_00302 | 226150  | 231576  | 5427  | 2.04  | 99.96 |
| chr7 | 15157782 | 15159139 | 1358  | 0.01 | C_unshiu_00302 | 233045  | 234402  | 1358  | 0.51  | 100   |
| chr7 | 15164066 | 15185810 | 21745 | 0.09 | C_unshiu_00302 | 238833  | 260586  | 21754 | 8.19  | 99.73 |
| chr7 | 15185831 | 15187598 | 1768  | 0.01 | C_unshiu_00302 | 261338  | 263105  | 1768  | 0.67  | 100   |
| chr7 | 15187591 | 15189842 | 2252  | 0.01 | C_unshiu_00351 | 199415  | 201666  | 2252  | 0.94  | 100   |
| chr7 | 15189843 | 15191066 | 1224  | 0.01 | C_unshiu_01298 | 53927   | 55152   | 1226  | 1.58  | 99.27 |
| chr7 | 15196756 | 15200391 | 3636  | 0.02 | C_unshiu_02572 | 1       | 3631    | 3631  | 15.98 | 99.23 |
| chr7 | 15201094 | 15204202 | 3109  | 0.01 | C_unshiu_00750 | 3149    | 6252    | 3104  | 2.27  | 98.2  |
| chr7 | 15211071 | 15216334 | 5264  | 0.02 | C_unshiu_02572 | 16605   | 21838   | 5234  | 23.03 | 98.01 |
| chr7 | 15216409 | 15221198 | 4790  | 0.02 | C_unshiu_00006 | 1116562 | 1111761 | 4802  | 0.43  | 98.24 |
| chr7 | 15221247 | 15248471 | 27225 | 0.11 | C_unshiu_02133 | 34273   | 7055    | 27219 | 76.62 | 99.69 |
| chr7 | 15248488 | 15252110 | 3623  | 0.02 | C_unshiu_00006 | 1102850 | 1099236 | 3615  | 0.32  | 98.73 |
| chr7 | 15260321 | 15263518 | 3198  | 0.01 | C_unshiu_01527 | 35918   | 39121   | 3204  | 5.18  | 98.29 |

|      |          |          |       |      |                |        |        |       |       |       |
|------|----------|----------|-------|------|----------------|--------|--------|-------|-------|-------|
| chr7 | 15274963 | 15277555 | 2593  | 0.01 | C_unshiu_00491 | 187756 | 185166 | 2591  | 1.32  | 98.96 |
| chr7 | 15294815 | 15302287 | 7473  | 0.03 | C_unshiu_01147 | 14393  | 21908  | 7516  | 8.25  | 98.26 |
| chr7 | 15304289 | 15314315 | 10027 | 0.04 | C_unshiu_01132 | 41459  | 51506  | 10048 | 10.85 | 99.3  |
| chr7 | 15315099 | 15323025 | 7927  | 0.03 | C_unshiu_01147 | 21905  | 29823  | 7919  | 8.69  | 98.46 |
| chr7 | 15347783 | 15352633 | 4851  | 0.02 | C_unshiu_00894 | 117688 | 112820 | 4869  | 4.14  | 99.59 |
| chr7 | 15360286 | 15364682 | 4397  | 0.02 | C_unshiu_00894 | 111256 | 106868 | 4389  | 3.73  | 98.12 |
| chr7 | 15366586 | 15368525 | 1940  | 0.01 | C_unshiu_00894 | 80447  | 82386  | 1940  | 1.65  | 99.43 |
| chr7 | 15376847 | 15377874 | 1028  | 0    | C_unshiu_00784 | 111067 | 112087 | 1021  | 0.78  | 98.25 |
| chr7 | 15388769 | 15400316 | 11548 | 0.05 | C_unshiu_00448 | 76052  | 87601  | 11550 | 5.54  | 99.55 |
| chr7 | 15406053 | 15411233 | 5181  | 0.02 | C_unshiu_00448 | 102994 | 108172 | 5179  | 2.48  | 99.09 |
| chr7 | 15412572 | 15428789 | 16218 | 0.07 | C_unshiu_00448 | 108596 | 124827 | 16232 | 7.78  | 99.54 |
| chr7 | 15440563 | 15449358 | 8796  | 0.04 | C_unshiu_00448 | 130239 | 139060 | 8822  | 4.23  | 98.73 |
| chr7 | 15453037 | 15465168 | 12132 | 0.05 | C_unshiu_00448 | 142190 | 154417 | 12228 | 5.86  | 98.1  |
| chr7 | 15479496 | 15485658 | 6163  | 0.03 | C_unshiu_00448 | 169765 | 175973 | 6209  | 2.98  | 98.36 |
| chr7 | 15485657 | 15504158 | 18502 | 0.08 | C_unshiu_00448 | 176506 | 195043 | 18538 | 8.88  | 98.83 |
| chr7 | 15504159 | 15508874 | 4716  | 0.02 | C_unshiu_00448 | 195689 | 200411 | 4723  | 2.26  | 98.14 |
| chr7 | 15508875 | 15527125 | 18251 | 0.08 | C_unshiu_02045 | 34784  | 16602  | 18183 | 46.73 | 98.57 |
| chr7 | 15527494 | 15544081 | 16588 | 0.07 | C_unshiu_02045 | 16607  | 1      | 16607 | 42.68 | 99.67 |
| chr7 | 15549969 | 15559047 | 9079  | 0.04 | C_unshiu_00884 | 104024 | 113124 | 9101  | 7.65  | 99.62 |
| chr7 | 15561199 | 15564729 | 3531  | 0.01 | C_unshiu_00884 | 115342 | 118928 | 3587  | 3.02  | 98.02 |
| chr7 | 15566585 | 15575531 | 8947  | 0.04 | C_unshiu_03003 | 12754  | 3915   | 8840  | 69.28 | 98    |
| chr7 | 15588735 | 15590487 | 1753  | 0.01 | C_unshiu_00245 | 86556  | 84795  | 1762  | 0.59  | 98.86 |
| chr7 | 15590574 | 15591708 | 1135  | 0    | C_unshiu_00245 | 84682  | 83548  | 1135  | 0.38  | 99.65 |
| chr7 | 15591833 | 15598429 | 6597  | 0.03 | C_unshiu_00245 | 83399  | 76796  | 6604  | 2.21  | 99.18 |
| chr7 | 15597968 | 15603185 | 5218  | 0.02 | C_unshiu_02427 | 26743  | 21522  | 5222  | 19.53 | 99.64 |
| chr7 | 15606847 | 15616812 | 9966  | 0.04 | C_unshiu_01529 | 5270   | 15226  | 9957  | 16.11 | 99.64 |
| chr7 | 15616818 | 15619449 | 2632  | 0.01 | C_unshiu_02135 | 24869  | 27503  | 2635  | 7.43  | 99.47 |
| chr7 | 15622325 | 15625376 | 3052  | 0.01 | C_unshiu_02963 | 5120   | 8171   | 3052  | 21.79 | 98.69 |
| chr7 | 15638617 | 15647296 | 8680  | 0.04 | C_unshiu_01529 | 39826  | 48566  | 8741  | 14.14 | 98.78 |
| chr7 | 15659417 | 15665297 | 5881  | 0.02 | C_unshiu_00542 | 174339 | 168458 | 5882  | 3.27  | 99.35 |
| chr7 | 15692337 | 15695557 | 3221  | 0.01 | C_unshiu_00542 | 143062 | 139842 | 3221  | 1.79  | 100   |
| chr7 | 15695692 | 15697300 | 1609  | 0.01 | C_unshiu_00542 | 139540 | 137929 | 1612  | 0.9   | 99.57 |
| chr7 | 15698495 | 15702966 | 4472  | 0.02 | C_unshiu_00542 | 134305 | 129834 | 4472  | 2.49  | 100   |
| chr7 | 15707589 | 15715384 | 7796  | 0.03 | C_unshiu_00542 | 125832 | 118042 | 7791  | 4.34  | 98.65 |
| chr7 | 15716869 | 15721699 | 4831  | 0.02 | C_unshiu_00542 | 117599 | 112781 | 4819  | 2.68  | 98.84 |
| chr7 | 15726139 | 15736026 | 9888  | 0.04 | C_unshiu_00542 | 108881 | 98996  | 9886  | 5.5   | 99.14 |
| chr7 | 15737377 | 15742764 | 5388  | 0.02 | C_unshiu_01834 | 41914  | 36527  | 5388  | 11.42 | 98.53 |
| chr7 | 15744176 | 15747443 | 3268  | 0.01 | C_unshiu_01834 | 36437  | 33173  | 3265  | 6.92  | 98.69 |
| chr7 | 15746178 | 15763837 | 17660 | 0.07 | C_unshiu_00542 | 91819  | 74177  | 17643 | 9.82  | 99.08 |
| chr7 | 15758095 | 15774834 | 16740 | 0.07 | C_unshiu_01834 | 33173  | 16454  | 16720 | 35.45 | 99.05 |
| chr7 | 15774826 | 15776418 | 1593  | 0.01 | C_unshiu_01669 | 31853  | 33445  | 1593  | 2.94  | 100   |
| chr7 | 15819436 | 15829376 | 9941  | 0.04 | C_unshiu_00542 | 34403  | 24451  | 9953  | 5.54  | 98.06 |
| chr7 | 15837703 | 15850949 | 13247 | 0.06 | C_unshiu_00542 | 13293  | 6      | 13288 | 7.39  | 99.18 |
| chr7 | 15862790 | 15863841 | 1052  | 0    | C_unshiu_00180 | 15125  | 16176  | 1052  | 0.29  | 100   |
| chr7 | 15875914 | 15882007 | 6094  | 0.03 | C_unshiu_01986 | 24760  | 18665  | 6096  | 14.86 | 99.82 |
| chr7 | 15882915 | 15887474 | 4560  | 0.02 | C_unshiu_01986 | 18605  | 14030  | 4576  | 11.16 | 98.52 |
| chr7 | 15893569 | 15894995 | 1427  | 0.01 | C_unshiu_02120 | 16547  | 17979  | 1433  | 4     | 98.88 |
| chr7 | 15898624 | 15899803 | 1180  | 0    | C_unshiu_00152 | 353333 | 354512 | 1180  | 0.31  | 98.47 |
| chr7 | 15899819 | 15902658 | 2840  | 0.01 | C_unshiu_02120 | 19854  | 22697  | 2844  | 7.93  | 98.49 |
| chr7 | 15902477 | 15906768 | 4292  | 0.02 | C_unshiu_02120 | 22697  | 26994  | 4298  | 11.99 | 98.49 |
| chr7 | 15906770 | 15912192 | 5423  | 0.02 | C_unshiu_02120 | 27160  | 32592  | 5433  | 15.16 | 98.07 |
| chr7 | 15910928 | 15913184 | 2257  | 0.01 | C_unshiu_01224 | 75074  | 77331  | 2258  | 2.71  | 99.56 |
| chr7 | 15914739 | 15916757 | 2019  | 0.01 | C_unshiu_01224 | 79597  | 81620  | 2024  | 2.43  | 99.26 |
| chr7 | 15915220 | 15918434 | 3215  | 0.01 | C_unshiu_02120 | 32593  | 35803  | 3211  | 8.96  | 98.97 |
| chr7 | 15924274 | 15926209 | 1936  | 0.01 | C_unshiu_01253 | 79023  | 77094  | 1930  | 2.39  | 98.35 |
| chr7 | 15926206 | 15932876 | 6671  | 0.03 | C_unshiu_01253 | 67196  | 60522  | 6675  | 8.27  | 98.34 |
| chr7 | 15938229 | 15940843 | 2615  | 0.01 | C_unshiu_01253 | 57090  | 54476  | 2615  | 3.24  | 100   |
| chr7 | 15946941 | 15951406 | 4466  | 0.02 | C_unshiu_01253 | 46940  | 42454  | 4487  | 5.56  | 98.46 |
| chr7 | 15963420 | 15972197 | 8778  | 0.04 | C_unshiu_00586 | 1      | 8795   | 8795  | 5.16  | 99.32 |
| chr7 | 15974616 | 15976268 | 1653  | 0.01 | C_unshiu_01467 | 40361  | 42013  | 1653  | 2.52  | 100   |
| chr7 | 15976817 | 15996482 | 19666 | 0.08 | C_unshiu_01467 | 43177  | 62901  | 19725 | 30.09 | 99.45 |
| chr7 | 15990687 | 15996482 | 5796  | 0.02 | C_unshiu_00229 | 32649  | 26850  | 5800  | 1.87  | 99.9  |
| chr7 | 15997213 | 16000122 | 2910  | 0.01 | C_unshiu_00229 | 25707  | 22802  | 2906  | 0.94  | 98.8  |
| chr7 | 16000805 | 16002271 | 1467  | 0.01 | C_unshiu_01132 | 41458  | 39992  | 1467  | 1.58  | 100   |
| chr7 | 16002264 | 16007481 | 5218  | 0.02 | C_unshiu_00095 | 160860 | 166072 | 5213  | 1.12  | 98.85 |
| chr7 | 16009896 | 16011032 | 1137  | 0    | C_unshiu_00095 | 168864 | 169994 | 1131  | 0.24  | 98.51 |
| chr7 | 16019523 | 16025012 | 5490  | 0.02 | C_unshiu_01777 | 30388  | 24917  | 5472  | 11.07 | 98.24 |
| chr7 | 16025531 | 16027376 | 1846  | 0.01 | C_unshiu_01777 | 23112  | 21267  | 1846  | 3.73  | 100   |
| chr7 | 16029582 | 16033440 | 3859  | 0.02 | C_unshiu_01777 | 18424  | 14605  | 3820  | 7.73  | 98.86 |
| chr7 | 16033633 | 16034678 | 1046  | 0    | C_unshiu_01777 | 14492  | 13447  | 1046  | 2.12  | 100   |
| chr7 | 16035585 | 16037508 | 1924  | 0.01 | C_unshiu_01777 | 12117  | 10194  | 1924  | 3.89  | 100   |
| chr7 | 16037608 | 16040745 | 3138  | 0.01 | C_unshiu_01777 | 10002  | 6865   | 3138  | 6.35  | 100   |
| chr7 | 16042243 | 16044026 | 1784  | 0.01 | C_unshiu_01777 | 4922   | 3140   | 1783  | 3.61  | 99.83 |
| chr7 | 16044586 | 16047035 | 2450  | 0.01 | C_unshiu_01777 | 2451   | 1      | 2451  | 4.96  | 99.8  |
| chr7 | 16073712 | 16085785 | 12074 | 0.05 | C_unshiu_00132 | 35155  | 47228  | 12074 | 2.93  | 100   |
| chr7 | 16086398 | 16104609 | 18212 | 0.08 | C_unshiu_01467 | 36287  | 18063  | 18225 | 27.8  | 99.87 |
| chr7 | 16105722 | 16107188 | 1467  | 0.01 | C_unshiu_02260 | 12494  | 13960  | 1467  | 4.7   | 99.93 |
| chr7 | 16107469 | 16109829 | 2361  | 0.01 | C_unshiu_02260 | 14513  | 16873  | 2361  | 7.57  | 100   |
| chr7 | 16109848 | 16114619 | 4772  | 0.02 | C_unshiu_02260 | 17586  | 22357  | 4772  | 15.29 | 99.98 |

|      |          |          |       |      |                |        |        |       |       |       |
|------|----------|----------|-------|------|----------------|--------|--------|-------|-------|-------|
| chr7 | 16114619 | 16116196 | 1578  | 0.01 | C_unshiu_00552 | 93842  | 92265  | 1578  | 0.88  | 100   |
| chr7 | 16116195 | 16122534 | 6340  | 0.03 | C_unshiu_02260 | 22968  | 29298  | 6331  | 20.29 | 99.65 |
| chr7 | 16124878 | 16145915 | 21038 | 0.09 | C_unshiu_00132 | 62814  | 83929  | 21116 | 5.13  | 98.78 |
| chr7 | 16153583 | 16162141 | 8559  | 0.04 | C_unshiu_00132 | 110956 | 119490 | 8535  | 2.07  | 99.02 |
| chr7 | 16162744 | 16166255 | 3512  | 0.01 | C_unshiu_00132 | 120498 | 124015 | 3518  | 0.85  | 98.81 |
| chr7 | 16166413 | 16198136 | 31724 | 0.13 | C_unshiu_00132 | 124017 | 155750 | 31734 | 7.7   | 99.55 |
| chr7 | 16199096 | 16204683 | 5588  | 0.02 | C_unshiu_00132 | 157121 | 162703 | 5583  | 1.36  | 98.27 |
| chr7 | 16206477 | 16210819 | 4343  | 0.02 | C_unshiu_00132 | 164371 | 168724 | 4354  | 1.06  | 99.56 |
| chr7 | 16211043 | 16216653 | 5611  | 0.02 | C_unshiu_00132 | 169239 | 174826 | 5588  | 1.36  | 99.18 |
| chr7 | 16217646 | 16236813 | 19168 | 0.08 | C_unshiu_00132 | 177066 | 196237 | 19172 | 4.65  | 99.76 |
| chr7 | 16236832 | 16240388 | 3557  | 0.01 | C_unshiu_00132 | 197011 | 200578 | 3568  | 0.87  | 99.05 |
| chr7 | 16246330 | 16258409 | 12080 | 0.05 | C_unshiu_02647 | 12105  | 1      | 12105 | 57.89 | 98.67 |
| chr7 | 16256420 | 16268155 | 11736 | 0.05 | C_unshiu_00132 | 211442 | 223176 | 11735 | 2.85  | 99.3  |
| chr7 | 16269839 | 16275571 | 5733  | 0.02 | C_unshiu_00132 | 224440 | 230190 | 5751  | 1.4   | 98.71 |
| chr7 | 16275745 | 16284424 | 8680  | 0.04 | C_unshiu_00132 | 230732 | 239414 | 8683  | 2.11  | 98.77 |
| chr7 | 16289754 | 16301232 | 11479 | 0.05 | C_unshiu_00132 | 246423 | 257908 | 11486 | 2.79  | 99.18 |
| chr7 | 16302909 | 16321387 | 18479 | 0.08 | C_unshiu_00132 | 260241 | 278739 | 18499 | 4.49  | 99.62 |
| chr7 | 16321387 | 16330147 | 8761  | 0.04 | C_unshiu_00132 | 279334 | 288101 | 8768  | 2.13  | 99.76 |
| chr7 | 16341805 | 16343810 | 2006  | 0.01 | C_unshiu_00245 | 52319  | 50312  | 2008  | 0.67  | 99.3  |
| chr7 | 16362068 | 16365655 | 3588  | 0.02 | C_unshiu_00245 | 28115  | 24511  | 3605  | 1.2   | 98.7  |
| chr7 | 16365846 | 16367340 | 1495  | 0.01 | C_unshiu_00245 | 24434  | 22936  | 1499  | 0.5   | 98.8  |
| chr7 | 16381702 | 16388203 | 6502  | 0.03 | C_unshiu_00245 | 6723   | 220    | 6504  | 2.17  | 99.74 |
| chr7 | 16388203 | 16389610 | 1408  | 0.01 | C_unshiu_00627 | 152478 | 151074 | 1405  | 0.87  | 98.02 |
| chr7 | 16390488 | 16401201 | 10714 | 0.05 | C_unshiu_00627 | 149607 | 138845 | 10763 | 6.68  | 98.53 |
| chr7 | 16408551 | 16416702 | 8152  | 0.03 | C_unshiu_00627 | 131744 | 123557 | 8188  | 5.09  | 98.38 |
| chr7 | 16424812 | 16428641 | 3830  | 0.02 | C_unshiu_02847 | 14714  | 10855  | 3860  | 23.09 | 98.32 |
| chr7 | 16426018 | 16428748 | 2731  | 0.01 | C_unshiu_00627 | 114942 | 112219 | 2724  | 1.69  | 98.79 |
| chr7 | 16428805 | 16439061 | 10257 | 0.04 | C_unshiu_02847 | 10270  | 1      | 10270 | 61.43 | 99.06 |
| chr7 | 16458266 | 16467741 | 9476  | 0.04 | C_unshiu_00637 | 121971 | 131436 | 9466  | 5.93  | 99.06 |
| chr7 | 16469829 | 16493005 | 23177 | 0.1  | C_unshiu_00637 | 132122 | 155402 | 23281 | 14.58 | 98.41 |
| chr7 | 16494363 | 16495928 | 1566  | 0.01 | C_unshiu_00637 | 156482 | 158047 | 1566  | 0.98  | 100   |
| chr7 | 16496925 | 16504142 | 7218  | 0.03 | C_unshiu_01243 | 76779  | 69557  | 7223  | 8.87  | 99.49 |
| chr7 | 16504124 | 16515301 | 11178 | 0.05 | C_unshiu_01243 | 69539  | 58344  | 11196 | 13.75 | 99.02 |
| chr7 | 16521431 | 16573157 | 51727 | 0.22 | C_unshiu_01243 | 51910  | 1      | 51910 | 63.74 | 98.54 |
| chr7 | 16584990 | 16592668 | 7679  | 0.03 | C_unshiu_01706 | 22832  | 30460  | 7629  | 14.6  | 98.35 |
| chr7 | 16609109 | 16615181 | 6073  | 0.03 | C_unshiu_01209 | 21607  | 27690  | 6084  | 7.18  | 99.29 |
| chr7 | 16615107 | 16618560 | 3454  | 0.01 | C_unshiu_01706 | 48786  | 52239  | 3454  | 6.61  | 99.83 |
| chr7 | 16629208 | 16632094 | 2887  | 0.01 | C_unshiu_02560 | 23049  | 20185  | 2865  | 12.43 | 98.79 |
| chr7 | 16632095 | 16639534 | 7440  | 0.03 | C_unshiu_02560 | 19800  | 12361  | 7440  | 32.28 | 100   |
| chr7 | 16644195 | 16647221 | 3027  | 0.01 | C_unshiu_02560 | 6576   | 3550   | 3027  | 13.13 | 99.7  |
| chr7 | 16711946 | 16716078 | 4133  | 0.02 | C_unshiu_01047 | 20099  | 24231  | 4133  | 4.1   | 99.98 |
| chr7 | 16756835 | 16763128 | 6294  | 0.03 | C_unshiu_01047 | 66714  | 73045  | 6332  | 6.29  | 98.53 |
| chr7 | 16763258 | 16776405 | 13148 | 0.06 | C_unshiu_01047 | 73065  | 86220  | 13156 | 13.06 | 98.47 |
| chr7 | 16786473 | 16792067 | 5595  | 0.02 | C_unshiu_02073 | 32117  | 37703  | 5587  | 14.82 | 98.38 |
| chr7 | 16789986 | 16793022 | 3037  | 0.01 | C_unshiu_01047 | 96731  | 99759  | 3029  | 3.01  | 98.29 |
| chr7 | 16796078 | 16806496 | 10419 | 0.04 | C_unshiu_02073 | 22075  | 11633  | 10443 | 27.7  | 98.75 |
| chr7 | 16811358 | 16813234 | 1877  | 0.01 | C_unshiu_01364 | 62243  | 60367  | 1877  | 2.56  | 98.03 |
| chr7 | 16850074 | 16851359 | 1286  | 0.01 | C_unshiu_01364 | 23443  | 22158  | 1286  | 1.75  | 98.99 |
| chr7 | 16854534 | 16861379 | 6846  | 0.03 | C_unshiu_01364 | 20301  | 13424  | 6878  | 9.37  | 98.56 |
| chr7 | 16881522 | 16888837 | 7316  | 0.03 | C_unshiu_00570 | 7318   | 1      | 7318  | 4.21  | 99.95 |
| chr7 | 16893929 | 16896226 | 2298  | 0.01 | C_unshiu_01987 | 40571  | 38274  | 2298  | 5.61  | 100   |
| chr7 | 16902839 | 16904590 | 1752  | 0.01 | C_unshiu_02026 | 26855  | 28607  | 1753  | 4.42  | 98.69 |
| chr7 | 16902906 | 16905411 | 2506  | 0.01 | C_unshiu_01987 | 35852  | 33349  | 2504  | 6.11  | 99.36 |
| chr7 | 16905904 | 16910244 | 4341  | 0.02 | C_unshiu_02026 | 30163  | 34502  | 4340  | 10.95 | 99.7  |
| chr7 | 16917481 | 16918760 | 1280  | 0.01 | C_unshiu_00164 | 345850 | 344572 | 1279  | 0.35  | 99.92 |
| chr7 | 16918536 | 16920363 | 1828  | 0.01 | C_unshiu_00164 | 34568  | 342740 | 1829  | 0.49  | 99.95 |
| chr7 | 16923070 | 16925511 | 2442  | 0.01 | C_unshiu_00164 | 339818 | 337365 | 2454  | 0.66  | 98.58 |
| chr7 | 16925501 | 16926593 | 1093  | 0    | C_unshiu_00164 | 337140 | 336044 | 1097  | 0.3   | 98.36 |
| chr7 | 16928630 | 16930833 | 2204  | 0.01 | C_unshiu_00164 | 332018 | 329814 | 2205  | 0.6   | 99.37 |
| chr7 | 16931301 | 16934516 | 3216  | 0.01 | C_unshiu_02396 | 7264   | 10478  | 3215  | 11.75 | 99.94 |
| chr7 | 16935141 | 16948833 | 13693 | 0.06 | C_unshiu_02396 | 10844  | 24512  | 13669 | 49.97 | 99.28 |
| chr7 | 16971533 | 16973849 | 2317  | 0.01 | C_unshiu_02340 | 19931  | 17607  | 2325  | 8.13  | 98.33 |
| chr7 | 16984597 | 16987565 | 2969  | 0.01 | C_unshiu_00752 | 135847 | 132879 | 2969  | 2.19  | 100   |
| chr7 | 16987567 | 17003373 | 15807 | 0.07 | C_unshiu_00752 | 131737 | 115941 | 15797 | 11.63 | 98.4  |
| chr7 | 17020938 | 17027319 | 6382  | 0.03 | C_unshiu_00752 | 97592  | 91197  | 6396  | 4.71  | 98.52 |
| chr7 | 17028986 | 17052112 | 23127 | 0.1  | C_unshiu_00752 | 91155  | 68021  | 23135 | 17.03 | 98.11 |
| chr7 | 17063322 | 17100869 | 37548 | 0.16 | C_unshiu_00752 | 66662  | 29085  | 37578 | 27.66 | 99.68 |
| chr7 | 17101029 | 17122888 | 21860 | 0.09 | C_unshiu_00752 | 28520  | 6658   | 21863 | 16.09 | 99.85 |
| chr7 | 17124407 | 17127122 | 2716  | 0.01 | C_unshiu_00354 | 145175 | 147890 | 2716  | 1.14  | 100   |
| chr7 | 17149713 | 17152567 | 2855  | 0.01 | C_unshiu_00968 | 62744  | 65583  | 2840  | 2.59  | 98.95 |
| chr7 | 17167452 | 17171859 | 4408  | 0.02 | C_unshiu_00968 | 82099  | 86508  | 4410  | 4.02  | 99.91 |
| chr7 | 17179097 | 17187231 | 8135  | 0.03 | C_unshiu_00968 | 89232  | 97340  | 8109  | 7.39  | 98.52 |
| chr7 | 17208248 | 17215481 | 7234  | 0.03 | C_unshiu_00690 | 129116 | 121850 | 7267  | 4.99  | 98.27 |
| chr7 | 17210177 | 17217728 | 7552  | 0.03 | C_unshiu_02401 | 19716  | 27257  | 7542  | 27.67 | 98.47 |
| chr7 | 17221119 | 17222583 | 1465  | 0.01 | C_unshiu_00690 | 117032 | 115563 | 1470  | 1.01  | 99.12 |
| chr7 | 17223000 | 17227006 | 4007  | 0.02 | C_unshiu_00690 | 114806 | 110766 | 4041  | 2.77  | 98.29 |
| chr7 | 17231718 | 17235360 | 3643  | 0.02 | C_unshiu_00690 | 108162 | 104519 | 3644  | 2.5   | 99.45 |
| chr7 | 17235486 | 17239459 | 3974  | 0.02 | C_unshiu_00690 | 104432 | 100459 | 3974  | 2.73  | 99.42 |
| chr7 | 17239278 | 17250124 | 10847 | 0.05 | C_unshiu_00690 | 100558 | 89716  | 10843 | 7.44  | 98.31 |

|      |          |          |       |      |                |        |        |       |       |       |
|------|----------|----------|-------|------|----------------|--------|--------|-------|-------|-------|
| chr7 | 17270278 | 17278053 | 7776  | 0.03 | C_unshiu_00690 | 70139  | 62372  | 7768  | 5.33  | 99.51 |
| chr7 | 17278181 | 17281900 | 3720  | 0.02 | C_unshiu_00690 | 62057  | 58338  | 3720  | 2.55  | 100   |
| chr7 | 17281922 | 17291667 | 9746  | 0.04 | C_unshiu_00690 | 58186  | 48538  | 9649  | 6.62  | 98.86 |
| chr7 | 17292435 | 17299544 | 7110  | 0.03 | C_unshiu_00690 | 47233  | 40180  | 7054  | 4.84  | 98.6  |
| chr7 | 17298550 | 17307015 | 8466  | 0.04 | C_unshiu_01580 | 39691  | 31230  | 8462  | 14.43 | 99.79 |
| chr7 | 17329150 | 17329543 | 7394  | 0.03 | C_unshiu_01580 | 10600  | 3248   | 7353  | 12.54 | 98.32 |
| chr7 | 17336991 | 17338559 | 1569  | 0.01 | C_unshiu_01580 | 2561   | 994    | 1568  | 2.67  | 99.94 |
| chr7 | 17340570 | 17342131 | 1562  | 0.01 | C_unshiu_00690 | 17035  | 15477  | 1559  | 1.07  | 98.79 |
| chr7 | 17358516 | 17359748 | 1233  | 0.01 | C_unshiu_00703 | 25311  | 26543  | 1233  | 0.86  | 100   |
| chr7 | 17368255 | 17370842 | 2588  | 0.01 | C_unshiu_00703 | 32695  | 35278  | 2584  | 1.8   | 99.19 |
| chr7 | 17370843 | 17376280 | 5438  | 0.02 | C_unshiu_00703 | 35185  | 40622  | 5438  | 3.79  | 99.14 |
| chr7 | 17408567 | 17414830 | 6264  | 0.03 | C_unshiu_00703 | 53631  | 59901  | 6271  | 4.37  | 99.38 |
| chr7 | 17431404 | 17443561 | 12158 | 0.05 | C_unshiu_00703 | 77157  | 89394  | 12238 | 8.54  | 98.23 |
| chr7 | 17446894 | 17450696 | 3803  | 0.02 | C_unshiu_00703 | 92530  | 96343  | 3814  | 2.66  | 98.93 |
| chr7 | 17450689 | 17453196 | 2508  | 0.01 | C_unshiu_00703 | 96722  | 99246  | 2525  | 1.76  | 98.26 |
| chr7 | 17453196 | 17461055 | 7860  | 0.03 | C_unshiu_00703 | 99685  | 107565 | 7881  | 5.5   | 98.17 |
| chr7 | 17482186 | 17489534 | 7349  | 0.03 | C_unshiu_00703 | 130383 | 137755 | 7373  | 5.14  | 98.25 |
| chr7 | 17490232 | 17492799 | 2568  | 0.01 | C_unshiu_01521 | 1      | 2555   | 2555  | 4.11  | 98.83 |
| chr7 | 17498441 | 17503364 | 4924  | 0.02 | C_unshiu_02691 | 4926   | 1      | 4926  | 24.56 | 99.43 |
| chr7 | 17511794 | 17513037 | 1244  | 0.01 | C_unshiu_01521 | 14714  | 15961  | 1248  | 2.01  | 99.52 |
| chr7 | 17523105 | 17526312 | 3208  | 0.01 | C_unshiu_01521 | 17771  | 20955  | 3185  | 5.12  | 98.04 |
| chr7 | 17532854 | 17534186 | 1333  | 0.01 | C_unshiu_01521 | 26498  | 27830  | 1333  | 2.14  | 100   |
| chr7 | 17536021 | 17539192 | 3172  | 0.01 | C_unshiu_01521 | 28142  | 31340  | 3199  | 5.14  | 98.13 |
| chr7 | 17537713 | 17543626 | 5914  | 0.02 | C_unshiu_01526 | 16092  | 22037  | 5946  | 9.61  | 98.42 |
| chr7 | 17550234 | 17583510 | 33277 | 0.14 | C_unshiu_01526 | 28630  | 61870  | 33241 | 53.73 | 98.9  |
| chr7 | 17582691 | 17605104 | 22414 | 0.09 | C_unshiu_01894 | 22546  | 44944  | 22399 | 49.84 | 98.85 |
| chr7 | 17602214 | 17638352 | 36139 | 0.15 | C_unshiu_00763 | 78587  | 42193  | 36395 | 27.01 | 98.03 |
| chr7 | 17643592 | 17652001 | 8410  | 0.04 | C_unshiu_00763 | 42198  | 33777  | 8422  | 6.25  | 98.55 |
| chr7 | 17674673 | 17677005 | 2333  | 0.01 | C_unshiu_02115 | 1      | 2333   | 2333  | 6.47  | 99.74 |
| chr7 | 17677272 | 17682084 | 4813  | 0.02 | C_unshiu_02115 | 2880   | 7693   | 4814  | 13.36 | 99.9  |
| chr7 | 17682093 | 17688934 | 6842  | 0.03 | C_unshiu_02115 | 8580   | 15418  | 6839  | 18.98 | 99.96 |
| chr7 | 17690859 | 17698545 | 7687  | 0.03 | C_unshiu_02115 | 16255  | 23913  | 7659  | 21.25 | 98.87 |
| chr7 | 17707907 | 17713070 | 5164  | 0.02 | C_unshiu_01676 | 29950  | 35111  | 5162  | 9.6   | 98.24 |
| chr7 | 17713234 | 17714968 | 1735  | 0.01 | C_unshiu_01676 | 24492  | 22759  | 1734  | 3.22  | 99.31 |
| chr7 | 17721015 | 17724577 | 3563  | 0.02 | C_unshiu_01676 | 18353  | 14800  | 3554  | 6.61  | 98.27 |
| chr7 | 17726456 | 17733698 | 7243  | 0.03 | C_unshiu_01676 | 13053  | 5809   | 7245  | 13.47 | 99.6  |
| chr7 | 17733967 | 17736222 | 2256  | 0.01 | C_unshiu_01676 | 5150   | 2895   | 2256  | 4.19  | 99.82 |
| chr7 | 17753782 | 17756667 | 2886  | 0.01 | C_unshiu_02500 | 21411  | 24297  | 2887  | 11.74 | 99.76 |
| chr7 | 17762650 | 17768274 | 5625  | 0.02 | C_unshiu_01015 | 70905  | 76478  | 5574  | 5.34  | 98.37 |
| chr7 | 17768675 | 17780499 | 11825 | 0.05 | C_unshiu_01015 | 77294  | 89149  | 11856 | 11.36 | 99.13 |
| chr7 | 17791451 | 17792887 | 1437  | 0.01 | C_unshiu_02500 | 892    | 2328   | 1437  | 5.84  | 99.37 |
| chr7 | 17793305 | 17795362 | 2058  | 0.01 | C_unshiu_01015 | 55178  | 57247  | 2070  | 1.98  | 98.6  |
| chr7 | 17800635 | 17803042 | 2408  | 0.01 | C_unshiu_01015 | 60212  | 62630  | 2419  | 2.32  | 99.21 |
| chr7 | 17811613 | 17812989 | 1377  | 0.01 | C_unshiu_00419 | 8281   | 9657   | 1377  | 0.63  | 98.91 |
| chr7 | 17813221 | 17819908 | 6688  | 0.03 | C_unshiu_00419 | 9818   | 16506  | 6689  | 3.05  | 99.72 |
| chr7 | 17821505 | 17824745 | 3241  | 0.01 | C_unshiu_01364 | 521    | 3761   | 3241  | 4.42  | 100   |
| chr7 | 17827593 | 17834614 | 7022  | 0.03 | C_unshiu_00419 | 15561  | 22585  | 7025  | 3.2   | 99.19 |
| chr7 | 17839110 | 17845893 | 6784  | 0.03 | C_unshiu_00419 | 22216  | 29019  | 6804  | 3.1   | 99.35 |
| chr7 | 17845499 | 17850315 | 4817  | 0.02 | C_unshiu_00419 | 29022  | 33836  | 4815  | 2.2   | 99.52 |
| chr7 | 17872654 | 17885523 | 12870 | 0.05 | C_unshiu_00793 | 102206 | 89284  | 12923 | 10.01 | 98.7  |
| chr7 | 17885513 | 17890599 | 5087  | 0.02 | C_unshiu_00793 | 89242  | 84141  | 5102  | 3.95  | 98.49 |
| chr7 | 17903604 | 17919517 | 15914 | 0.07 | C_unshiu_00793 | 84150  | 68180  | 15971 | 12.37 | 98.07 |
| chr7 | 17919518 | 17924875 | 5358  | 0.02 | C_unshiu_02382 | 5698   | 11048  | 5351  | 19.36 | 98.58 |
| chr7 | 17924673 | 17928171 | 3499  | 0.01 | C_unshiu_00793 | 57992  | 54491  | 3502  | 2.71  | 99.69 |
| chr7 | 17928517 | 17931660 | 3144  | 0.01 | C_unshiu_00793 | 53603  | 50459  | 3145  | 2.44  | 99.4  |
| chr7 | 17939415 | 17949741 | 10327 | 0.04 | C_unshiu_00793 | 42206  | 31878  | 10329 | 8     | 99.97 |
| chr7 | 17952595 | 17957925 | 5331  | 0.02 | C_unshiu_00861 | 44710  | 39376  | 5335  | 4.39  | 99.46 |
| chr7 | 17959005 | 17961521 | 2517  | 0.01 | C_unshiu_00861 | 39376  | 36854  | 2523  | 2.08  | 98.97 |
| chr7 | 17985358 | 18018054 | 32697 | 0.14 | C_unshiu_01042 | 57153  | 24471  | 32683 | 32.22 | 99.43 |
| chr7 | 18020127 | 18032984 | 12858 | 0.05 | C_unshiu_01042 | 19108  | 6291   | 12818 | 12.64 | 99.46 |
| chr7 | 18044020 | 18045123 | 1104  | 0    | C_unshiu_00358 | 188328 | 187224 | 1105  | 0.47  | 99.82 |
| chr7 | 18073344 | 18076674 | 3331  | 0.01 | C_unshiu_01471 | 14382  | 17728  | 3347  | 5.13  | 98.45 |
| chr7 | 18092912 | 18094419 | 1508  | 0.01 | C_unshiu_00149 | 199516 | 198009 | 1508  | 0.39  | 100   |
| chr7 | 18096223 | 18109316 | 13094 | 0.06 | C_unshiu_01471 | 17720  | 30796  | 13077 | 20.06 | 98.63 |
| chr7 | 18138148 | 18142004 | 3857  | 0.02 | C_unshiu_01471 | 60510  | 64339  | 3830  | 5.88  | 98.24 |
| chr7 | 18149169 | 18156069 | 6901  | 0.03 | C_unshiu_00762 | 132705 | 125821 | 6885  | 5.11  | 98.91 |
| chr7 | 18156146 | 18160336 | 4191  | 0.02 | C_unshiu_02568 | 1      | 4191   | 4191  | 18.31 | 100   |
| chr7 | 18160614 | 18206477 | 45864 | 0.19 | C_unshiu_00762 | 126034 | 80177  | 45858 | 34.02 | 99.8  |
| chr7 | 18206636 | 18211876 | 5241  | 0.02 | C_unshiu_02568 | 14997  | 20218  | 5222  | 22.82 | 98.63 |
| chr7 | 18212840 | 18229791 | 16952 | 0.07 | C_unshiu_00762 | 71794  | 54797  | 16998 | 12.61 | 98.81 |
| chr7 | 18228551 | 18231232 | 2682  | 0.01 | C_unshiu_01316 | 1      | 2681   | 2681  | 3.54  | 99.52 |
| chr7 | 18231264 | 18235213 | 3950  | 0.02 | C_unshiu_01316 | 3109   | 7058   | 3950  | 5.21  | 99.97 |
| chr7 | 18247938 | 18252161 | 4224  | 0.02 | C_unshiu_01316 | 19368  | 23594  | 4227  | 5.58  | 99.12 |
| chr7 | 18249005 | 18259681 | 10677 | 0.04 | C_unshiu_00762 | 52506  | 41831  | 10676 | 7.92  | 99.07 |
| chr7 | 18261940 | 18289096 | 27157 | 0.11 | C_unshiu_01316 | 28405  | 55551  | 27147 | 35.84 | 99.89 |
| chr7 | 18289122 | 18295528 | 6407  | 0.03 | C_unshiu_01316 | 55661  | 62040  | 6380  | 8.42  | 98.33 |
| chr7 | 18296717 | 18301857 | 5141  | 0.02 | C_unshiu_00762 | 32043  | 26894  | 5150  | 3.82  | 99.46 |
| chr7 | 18301885 | 18323788 | 21904 | 0.09 | C_unshiu_00762 | 27007  | 5109   | 21899 | 16.25 | 99.88 |
| chr7 | 18324807 | 18326271 | 1465  | 0.01 | C_unshiu_00762 | 3784   | 2320   | 1465  | 1.09  | 100   |

|      |          |          |       |      |                |        |        |       |       |       |
|------|----------|----------|-------|------|----------------|--------|--------|-------|-------|-------|
| chr7 | 18326562 | 18328007 | 1446  | 0.01 | C_unshiu_00555 | 129839 | 131284 | 1446  | 0.82  | 100   |
| chr7 | 18334968 | 18399976 | 65009 | 0.27 | C_unshiu_00578 | 165267 | 100258 | 65010 | 37.84 | 99.37 |
| chr7 | 18402406 | 18408517 | 6112  | 0.03 | C_unshiu_00578 | 95811  | 89700  | 6112  | 3.56  | 98.76 |
| chr7 | 18425993 | 18428589 | 2597  | 0.01 | C_unshiu_00578 | 73480  | 70882  | 2599  | 1.51  | 99.58 |
| chr7 | 18430441 | 18432313 | 1873  | 0.01 | C_unshiu_00578 | 67518  | 65645  | 1874  | 1.09  | 98.67 |
| chr7 | 18433858 | 18436130 | 2273  | 0.01 | C_unshiu_00578 | 65650  | 63375  | 2276  | 1.32  | 98.95 |
| chr7 | 18434891 | 18447049 | 12159 | 0.05 | C_unshiu_01781 | 41069  | 28927  | 12143 | 24.66 | 99    |
| chr7 | 18447150 | 18448283 | 1134  | 0    | C_unshiu_00243 | 246350 | 245217 | 1134  | 0.38  | 100   |
| chr7 | 18448286 | 18453155 | 4870  | 0.02 | C_unshiu_01529 | 4927   | 67     | 4861  | 7.86  | 99.22 |
| chr7 | 18465917 | 18499446 | 33530 | 0.14 | C_unshiu_00243 | 229096 | 195622 | 33475 | 11.15 | 98.36 |
| chr7 | 18496636 | 18517756 | 21121 | 0.09 | C_unshiu_01581 | 21159  | 1      | 21159 | 36.11 | 99.21 |
| chr7 | 18534616 | 18544081 | 9466  | 0.04 | C_unshiu_00243 | 195621 | 186142 | 9480  | 3.16  | 99.04 |
| chr7 | 18545896 | 18547886 | 1991  | 0.01 | C_unshiu_00243 | 184533 | 182540 | 1994  | 0.66  | 99.25 |
| chr7 | 18552564 | 18559129 | 6566  | 0.03 | C_unshiu_00243 | 178742 | 172169 | 6574  | 2.19  | 98.88 |
| chr7 | 18559176 | 18582620 | 23445 | 0.1  | C_unshiu_00243 | 171778 | 148352 | 23427 | 7.8   | 98.76 |
| chr7 | 18615004 | 18623627 | 8624  | 0.04 | C_unshiu_01788 | 48724  | 40065  | 8660  | 17.73 | 98.9  |
| chr7 | 18626645 | 18628921 | 2277  | 0.01 | C_unshiu_01919 | 38655  | 36379  | 2277  | 5.18  | 100   |
| chr7 | 18630911 | 18634034 | 3124  | 0.01 | C_unshiu_01788 | 28438  | 25315  | 3124  | 6.4   | 99.87 |
| chr7 | 18634530 | 18645370 | 10841 | 0.05 | C_unshiu_01919 | 28837  | 17976  | 10862 | 24.7  | 98.52 |
| chr7 | 18645388 | 18652120 | 6733  | 0.03 | C_unshiu_00948 | 106396 | 99655  | 6742  | 6.03  | 98.12 |
| chr7 | 18648330 | 18658560 | 10231 | 0.04 | C_unshiu_00948 | 76509  | 86722  | 10214 | 9.14  | 98.27 |
| chr7 | 18660041 | 18667154 | 7114  | 0.03 | C_unshiu_00323 | 127587 | 120472 | 7116  | 2.79  | 99.93 |
| chr7 | 18668783 | 18673891 | 5109  | 0.02 | C_unshiu_00323 | 118262 | 113155 | 5108  | 2     | 99.98 |
| chr7 | 18674768 | 18700462 | 25695 | 0.11 | C_unshiu_01135 | 57938  | 83639  | 25702 | 27.86 | 99.39 |
| chr7 | 18703061 | 18707356 | 4296  | 0.02 | C_unshiu_00420 | 30843  | 26546  | 4298  | 1.96  | 99.81 |
| chr7 | 18708948 | 18710819 | 1872  | 0.01 | C_unshiu_01135 | 87594  | 89465  | 1872  | 2.03  | 99.73 |
| chr7 | 18716232 | 18721834 | 5603  | 0.02 | C_unshiu_00420 | 21413  | 15801  | 5613  | 2.56  | 99.22 |
| chr7 | 18723246 | 18725249 | 2004  | 0.01 | C_unshiu_01384 | 7      | 1996   | 1990  | 2.79  | 98.75 |
| chr7 | 18731459 | 18739814 | 8356  | 0.04 | C_unshiu_01384 | 7997   | 16352  | 8356  | 11.71 | 100   |
| chr7 | 18742661 | 18745969 | 3309  | 0.01 | C_unshiu_01384 | 17919  | 21227  | 3309  | 4.64  | 100   |
| chr7 | 18747233 | 18750360 | 3128  | 0.01 | C_unshiu_00360 | 47468  | 44341  | 3128  | 1.32  | 100   |
| chr7 | 18751741 | 18762691 | 10951 | 0.05 | C_unshiu_01384 | 26474  | 37435  | 10962 | 15.36 | 98.83 |
| chr7 | 18764117 | 18791196 | 27080 | 0.11 | C_unshiu_01384 | 38794  | 65730  | 26937 | 37.75 | 98.93 |
| chr7 | 18825853 | 18829446 | 3594  | 0.02 | C_unshiu_02481 | 1      | 3594   | 3594  | 14.27 | 100   |
| chr7 | 18829457 | 18846819 | 17363 | 0.07 | C_unshiu_02481 | 3885   | 21142  | 17258 | 68.55 | 99.06 |
| chr7 | 18866923 | 18891359 | 24437 | 0.1  | C_unshiu_00171 | 40927  | 16489  | 24439 | 6.66  | 99.93 |
| chr7 | 18891873 | 18894429 | 2557  | 0.01 | C_unshiu_00171 | 15448  | 12892  | 2557  | 0.7   | 99.06 |
| chr7 | 18896905 | 18908953 | 12049 | 0.05 | C_unshiu_00171 | 12069  | 17     | 12053 | 3.28  | 99.12 |
| chr7 | 18905554 | 18917847 | 12294 | 0.05 | C_unshiu_01609 | 31763  | 19471  | 12293 | 21.53 | 98.92 |
| chr7 | 18922611 | 18926912 | 4302  | 0.02 | C_unshiu_01609 | 14004  | 9703   | 4302  | 7.53  | 98.82 |
| chr7 | 18936314 | 18942590 | 6277  | 0.03 | C_unshiu_01609 | 7199   | 921    | 6279  | 11    | 99.92 |
| chr7 | 18944264 | 18984677 | 40414 | 0.17 | C_unshiu_00180 | 358017 | 317610 | 40408 | 11.25 | 99.57 |
| chr7 | 18984639 | 18990662 | 6024  | 0.03 | C_unshiu_00180 | 317413 | 311374 | 6040  | 1.68  | 98.89 |
| chr7 | 18990777 | 19003888 | 13112 | 0.06 | C_unshiu_00180 | 311241 | 298145 | 13097 | 3.65  | 99.19 |
| chr7 | 19003788 | 19011199 | 7412  | 0.03 | C_unshiu_00180 | 298146 | 290729 | 7418  | 2.07  | 99.39 |
| chr7 | 19013397 | 19019516 | 6120  | 0.03 | C_unshiu_00180 | 290665 | 284546 | 6120  | 1.7   | 98.43 |
| chr7 | 19019319 | 19036286 | 16968 | 0.07 | C_unshiu_00180 | 284538 | 267495 | 17044 | 4.75  | 98.45 |
| chr7 | 19044101 | 19075719 | 31619 | 0.13 | C_unshiu_00180 | 263858 | 232202 | 31657 | 8.82  | 98.64 |
| chr7 | 19076802 | 19082489 | 5688  | 0.02 | C_unshiu_00180 | 230925 | 225270 | 5656  | 1.58  | 99.1  |
| chr7 | 19102815 | 19112444 | 9630  | 0.04 | C_unshiu_00180 | 204352 | 194692 | 9661  | 2.69  | 98.79 |
| chr7 | 19112543 | 19131387 | 18845 | 0.08 | C_unshiu_00180 | 194553 | 175638 | 18916 | 5.27  | 98.16 |
| chr7 | 19132922 | 19159366 | 26445 | 0.11 | C_unshiu_00180 | 175224 | 148799 | 26426 | 7.36  | 98.01 |
| chr7 | 19161023 | 19174937 | 13915 | 0.06 | C_unshiu_00180 | 146722 | 132755 | 13968 | 3.89  | 98.99 |
| chr7 | 19175089 | 19198468 | 23380 | 0.1  | C_unshiu_00180 | 132755 | 109383 | 23373 | 6.51  | 99.22 |
| chr7 | 19207703 | 19232472 | 24770 | 0.1  | C_unshiu_00180 | 99403  | 74624  | 24780 | 6.9   | 98.75 |
| chr7 | 19236018 | 19239803 | 3786  | 0.02 | C_unshiu_00180 | 69008  | 65205  | 3804  | 1.06  | 98.79 |
| chr7 | 19252331 | 19256878 | 4548  | 0.02 | C_unshiu_00180 | 42260  | 46811  | 4552  | 1.27  | 99.38 |
| chr7 | 19265049 | 19273564 | 8516  | 0.04 | C_unshiu_00293 | 202579 | 194057 | 8523  | 3.16  | 98.79 |
| chr7 | 19269256 | 19275886 | 6631  | 0.03 | C_unshiu_00837 | 1054   | 7661   | 6608  | 5.33  | 98.75 |
| chr7 | 19277037 | 19285843 | 8807  | 0.04 | C_unshiu_00293 | 188758 | 179946 | 8813  | 3.27  | 98.85 |
| chr7 | 19288235 | 19293418 | 5184  | 0.02 | C_unshiu_00293 | 179039 | 173843 | 5197  | 1.93  | 98.15 |
| chr7 | 19294501 | 19299871 | 5371  | 0.02 | C_unshiu_00293 | 174208 | 168830 | 5379  | 1.99  | 99.02 |
| chr7 | 19299864 | 19308656 | 8793  | 0.04 | C_unshiu_00293 | 168750 | 159935 | 8816  | 3.27  | 99.2  |
| chr7 | 19310159 | 19327528 | 17370 | 0.07 | C_unshiu_00293 | 156773 | 139350 | 17424 | 6.46  | 98.16 |
| chr7 | 19342802 | 19344629 | 1828  | 0.01 | C_unshiu_00456 | 200767 | 202598 | 1832  | 0.89  | 98.69 |
| chr7 | 19365211 | 19373480 | 8270  | 0.03 | C_unshiu_00293 | 109504 | 101212 | 8293  | 3.07  | 98.47 |
| chr7 | 19382955 | 19388672 | 5718  | 0.02 | C_unshiu_00293 | 85821  | 80073  | 5749  | 2.13  | 98.39 |
| chr7 | 19390027 | 19391342 | 1316  | 0.01 | C_unshiu_02239 | 7736   | 6421   | 1316  | 4.11  | 98.56 |
| chr7 | 19393618 | 19439364 | 45747 | 0.19 | C_unshiu_00293 | 80066  | 34317  | 45750 | 16.96 | 99.67 |
| chr7 | 19439640 | 19444911 | 5272  | 0.02 | C_unshiu_00293 | 33799  | 28520  | 5280  | 1.96  | 99.34 |
| chr7 | 19445732 | 19450373 | 4642  | 0.02 | C_unshiu_02436 | 759    | 5412   | 4654  | 17.56 | 98.86 |
| chr7 | 19450372 | 19470053 | 19682 | 0.08 | C_unshiu_02436 | 5818   | 25565  | 19748 | 74.5  | 98.46 |
| chr7 | 19471170 | 19474234 | 3065  | 0.01 | C_unshiu_00999 | 106151 | 103106 | 3046  | 2.87  | 98.11 |
| chr7 | 19478173 | 19488204 | 10032 | 0.04 | C_unshiu_00999 | 99980  | 89944  | 10037 | 9.46  | 99.95 |
| chr7 | 19493553 | 19495547 | 1995  | 0.01 | C_unshiu_00999 | 85466  | 83472  | 1995  | 1.88  | 99.9  |
| chr7 | 19533324 | 19542540 | 9217  | 0.04 | C_unshiu_00901 | 69864  | 60661  | 9204  | 7.87  | 99.71 |
| chr7 | 19542950 | 19544913 | 1964  | 0.01 | C_unshiu_00901 | 59673  | 57710  | 1964  | 1.68  | 99.95 |
| chr7 | 19544924 | 19574736 | 29813 | 0.13 | C_unshiu_00901 | 57126  | 27311  | 29816 | 25.49 | 99.12 |
| chr7 | 19574582 | 19580161 | 5580  | 0.02 | C_unshiu_00533 | 124644 | 130223 | 5580  | 3.05  | 99.37 |

|      |          |          |       |      |                |        |        |       |       |       |
|------|----------|----------|-------|------|----------------|--------|--------|-------|-------|-------|
| chr7 | 19580166 | 19594256 | 14091 | 0.06 | C_unshiu_00533 | 130369 | 144477 | 14109 | 7.72  | 98.46 |
| chr7 | 19594962 | 19599178 | 4217  | 0.02 | C_unshiu_00901 | 6815   | 2595   | 4221  | 3.61  | 99.46 |
| chr7 | 19599177 | 19601408 | 2232  | 0.01 | C_unshiu_00901 | 2231   | 1      | 2231  | 1.91  | 98.61 |
| chr7 | 19603490 | 19604881 | 1392  | 0.01 | C_unshiu_00533 | 155576 | 156971 | 1396  | 0.76  | 99.21 |
| chr7 | 19605247 | 19607100 | 1854  | 0.01 | C_unshiu_00533 | 157191 | 159038 | 1848  | 1.01  | 98.71 |
| chr7 | 19607102 | 19610367 | 3266  | 0.01 | C_unshiu_00533 | 160116 | 163388 | 3273  | 1.79  | 99.08 |
| chr7 | 19611437 | 19615410 | 3974  | 0.02 | C_unshiu_00533 | 163758 | 167735 | 3978  | 2.18  | 99.52 |
| chr7 | 19625422 | 19626602 | 1181  | 0    | C_unshiu_00533 | 167741 | 168921 | 1181  | 0.65  | 98.23 |
| chr7 | 19628837 | 19649166 | 20330 | 0.09 | C_unshiu_02423 | 22007  | 1699   | 20309 | 75.7  | 98.01 |
| chr7 | 19680153 | 19682885 | 2733  | 0.01 | C_unshiu_01430 | 36561  | 33829  | 2733  | 4     | 100   |
| chr7 | 19693168 | 19697699 | 4532  | 0.02 | C_unshiu_01628 | 4216   | 8747   | 4532  | 8.08  | 99.07 |
| chr7 | 19699023 | 19701160 | 2138  | 0.01 | C_unshiu_01179 | 30001  | 32138  | 2138  | 2.44  | 100   |
| chr7 | 19701166 | 19706047 | 4882  | 0.02 | C_unshiu_01628 | 12137  | 16999  | 4863  | 8.67  | 99.32 |
| chr7 | 19710373 | 19723425 | 13053 | 0.05 | C_unshiu_01628 | 16362  | 29435  | 13074 | 23.3  | 98    |
| chr7 | 19726672 | 19760557 | 33886 | 0.14 | C_unshiu_01018 | 16423  | 50312  | 33890 | 32.54 | 99.94 |
| chr7 | 19764083 | 19779771 | 15689 | 0.07 | C_unshiu_01749 | 50594  | 34863  | 15732 | 31.09 | 99.28 |
| chr7 | 19783776 | 19804721 | 20946 | 0.09 | C_unshiu_01275 | 19803  | 40674  | 20872 | 26.38 | 98.4  |
| chr7 | 19805591 | 19839098 | 33508 | 0.14 | C_unshiu_01275 | 40967  | 74422  | 33456 | 42.29 | 98.96 |
| chr7 | 19850351 | 19881154 | 30804 | 0.13 | C_unshiu_00492 | 116435 | 85666  | 30770 | 15.79 | 99.41 |
| chr7 | 19884220 | 19885266 | 1047  | 0    | C_unshiu_03102 | 5467   | 6516   | 1050  | 11.19 | 99.05 |
| chr7 | 19890138 | 19906478 | 16341 | 0.07 | C_unshiu_00492 | 81695  | 65287  | 16409 | 8.42  | 98.91 |
| chr7 | 19910572 | 19927499 | 16928 | 0.07 | C_unshiu_00492 | 61918  | 45098  | 16821 | 8.63  | 98.17 |
| chr7 | 19928521 | 19939707 | 11187 | 0.05 | C_unshiu_01455 | 49175  | 60370  | 11196 | 16.93 | 98.8  |
| chr7 | 19941925 | 19946072 | 4148  | 0.02 | C_unshiu_01455 | 61986  | 66137  | 4152  | 6.28  | 98.41 |
| chr7 | 19944678 | 19957804 | 13127 | 0.06 | C_unshiu_02268 | 19904  | 6781   | 13124 | 42.5  | 98.52 |
| chr7 | 19961130 | 19962979 | 1850  | 0.01 | C_unshiu_02044 | 15682  | 17531  | 1850  | 4.75  | 99.78 |
| chr7 | 19963338 | 19969565 | 6228  | 0.03 | C_unshiu_02044 | 17781  | 24031  | 6251  | 16.06 | 98.66 |
| chr7 | 19982532 | 19983721 | 1190  | 0.01 | C_unshiu_01744 | 34500  | 33313  | 1188  | 2.34  | 98.49 |
| chr7 | 19984380 | 20000044 | 15665 | 0.07 | C_unshiu_01744 | 32232  | 16653  | 15580 | 30.68 | 98.28 |
| chr7 | 20000094 | 20004311 | 4218  | 0.02 | C_unshiu_01744 | 16337  | 12141  | 4197  | 8.27  | 98.82 |
| chr7 | 20005028 | 20008047 | 3020  | 0.01 | C_unshiu_01744 | 11035  | 8025   | 3011  | 5.93  | 99.01 |
| chr7 | 20010845 | 20025904 | 15060 | 0.06 | C_unshiu_02129 | 1397   | 16480  | 15084 | 42.36 | 98.74 |
| chr7 | 20025894 | 20032713 | 6820  | 0.03 | C_unshiu_02129 | 16778  | 23624  | 6847  | 19.23 | 99.27 |
| chr7 | 20032733 | 20045591 | 12859 | 0.05 | C_unshiu_00577 | 1430   | 14286  | 12857 | 7.47  | 99.74 |
| chr7 | 20045578 | 20048175 | 2598  | 0.01 | C_unshiu_00577 | 14386  | 16995  | 2610  | 1.52  | 98.85 |
| chr7 | 20066118 | 20092407 | 26290 | 0.11 | C_unshiu_00577 | 39854  | 66154  | 26301 | 15.29 | 99.29 |
| chr7 | 20092394 | 20100628 | 8235  | 0.03 | C_unshiu_00577 | 67208  | 75443  | 8236  | 4.79  | 99.47 |
| chr7 | 20101221 | 20104834 | 3614  | 0.02 | C_unshiu_00577 | 76254  | 79864  | 3611  | 2.1   | 98.26 |
| chr7 | 20104872 | 20114048 | 9177  | 0.04 | C_unshiu_00577 | 79681  | 88875  | 9195  | 5.35  | 98.34 |
| chr7 | 20114030 | 20120954 | 6925  | 0.03 | C_unshiu_00577 | 90287  | 97198  | 6912  | 4.02  | 98.86 |
| chr7 | 20121056 | 20146838 | 25783 | 0.11 | C_unshiu_00577 | 98242  | 124029 | 25788 | 14.99 | 99.81 |
| chr7 | 20158928 | 20170042 | 11115 | 0.05 | C_unshiu_00577 | 123409 | 134514 | 11106 | 6.46  | 98    |
| chr7 | 20170097 | 20199778 | 29682 | 0.13 | C_unshiu_00577 | 135209 | 164890 | 29682 | 17.26 | 99.11 |
| chr7 | 20205618 | 20215006 | 9389  | 0.04 | C_unshiu_00060 | 232180 | 222822 | 9359  | 1.62  | 98.29 |
| chr7 | 20218987 | 20254229 | 35243 | 0.15 | C_unshiu_00060 | 219184 | 183952 | 35233 | 6.08  | 99.13 |
| chr7 | 20257793 | 20261591 | 3799  | 0.02 | C_unshiu_00060 | 179676 | 175884 | 3793  | 0.65  | 99.82 |
| chr7 | 20263382 | 20265489 | 2108  | 0.01 | C_unshiu_00060 | 173889 | 171782 | 2108  | 0.36  | 100   |
| chr7 | 20268565 | 20277172 | 8608  | 0.04 | C_unshiu_00060 | 169515 | 160898 | 8618  | 1.49  | 99.68 |
| chr7 | 20277192 | 20286730 | 9539  | 0.04 | C_unshiu_00060 | 160481 | 150998 | 9484  | 1.64  | 98.48 |
| chr7 | 20286743 | 20295336 | 8594  | 0.04 | C_unshiu_00060 | 150819 | 142230 | 8590  | 1.48  | 99.08 |
| chr7 | 20295602 | 20307060 | 11459 | 0.05 | C_unshiu_00060 | 142033 | 130648 | 11386 | 1.97  | 98.42 |
| chr7 | 20307049 | 20308805 | 1757  | 0.01 | C_unshiu_00060 | 130619 | 128862 | 1758  | 0.3   | 99.89 |
| chr7 | 20308801 | 20325920 | 17120 | 0.07 | C_unshiu_00060 | 121213 | 104008 | 17206 | 2.97  | 99.06 |
| chr7 | 20330808 | 20332280 | 1473  | 0.01 | C_unshiu_00060 | 98977  | 97505  | 1473  | 0.25  | 99.86 |
| chr7 | 20349180 | 20356968 | 7789  | 0.03 | C_unshiu_00463 | 48355  | 40583  | 7773  | 3.82  | 99.69 |
| chr7 | 20363767 | 20366680 | 2914  | 0.01 | C_unshiu_00463 | 34793  | 31880  | 2914  | 1.43  | 99.76 |
| chr7 | 20366524 | 20367748 | 1225  | 0.01 | C_unshiu_00463 | 31882  | 30662  | 1221  | 0.6   | 99.1  |
| chr7 | 20390330 | 20392937 | 2608  | 0.01 | C_unshiu_00521 | 56537  | 59161  | 2625  | 1.42  | 98.67 |
| chr7 | 20402712 | 20404471 | 1760  | 0.01 | C_unshiu_00521 | 64902  | 66661  | 1760  | 0.95  | 100   |
| chr7 | 20404647 | 20406394 | 1748  | 0.01 | C_unshiu_00521 | 67150  | 68897  | 1748  | 0.94  | 99.94 |
| chr7 | 20418246 | 20420836 | 2591  | 0.01 | C_unshiu_00521 | 81100  | 83696  | 2597  | 1.4   | 98.58 |
| chr7 | 20435091 | 20451297 | 16207 | 0.07 | C_unshiu_00521 | 99822  | 116030 | 16209 | 8.75  | 98.26 |
| chr7 | 20451687 | 20454249 | 2563  | 0.01 | C_unshiu_00521 | 115705 | 118261 | 2557  | 1.38  | 99.57 |
| chr7 | 20462107 | 20470224 | 8118  | 0.03 | C_unshiu_03014 | 1      | 8055   | 8055  | 64.25 | 98.05 |
| chr7 | 20464835 | 20470439 | 5605  | 0.02 | C_unshiu_00521 | 126458 | 132067 | 5610  | 3.03  | 99.27 |
| chr7 | 20470457 | 20472050 | 1594  | 0.01 | C_unshiu_00521 | 133021 | 134614 | 1594  | 0.86  | 100   |
| chr7 | 20472058 | 20473697 | 1640  | 0.01 | C_unshiu_03014 | 10898  | 12537  | 1640  | 13.08 | 100   |
| chr7 | 20474775 | 20480575 | 5801  | 0.02 | C_unshiu_00521 | 136166 | 141966 | 5801  | 3.13  | 99.9  |
| chr7 | 20482084 | 20488085 | 6002  | 0.03 | C_unshiu_00521 | 142173 | 148193 | 6021  | 3.25  | 98.29 |
| chr7 | 20488910 | 20495852 | 6943  | 0.03 | C_unshiu_00521 | 149019 | 155963 | 6945  | 3.75  | 99.12 |
| chr7 | 20490542 | 20497408 | 6867  | 0.03 | C_unshiu_01242 | 75678  | 68839  | 6840  | 8.38  | 98.14 |
| chr7 | 20496637 | 20499317 | 2681  | 0.01 | C_unshiu_00521 | 156641 | 159323 | 2683  | 1.45  | 98.99 |
| chr7 | 20509000 | 20512482 | 3483  | 0.01 | C_unshiu_00521 | 178031 | 181511 | 3481  | 1.88  | 99.74 |
| chr7 | 20531676 | 20534170 | 2495  | 0.01 | C_unshiu_00338 | 248489 | 245995 | 2495  | 1     | 100   |
| chr7 | 20534186 | 20535831 | 1646  | 0.01 | C_unshiu_01242 | 33974  | 32319  | 1656  | 2.03  | 99.4  |
| chr7 | 20537319 | 20539013 | 1695  | 0.01 | C_unshiu_01242 | 30618  | 28924  | 1695  | 2.08  | 100   |
| chr7 | 20542821 | 20547427 | 4607  | 0.02 | C_unshiu_01242 | 26447  | 21840  | 4608  | 5.65  | 99.05 |
| chr7 | 20562577 | 20584062 | 21486 | 0.09 | C_unshiu_00816 | 94241  | 115774 | 21534 | 16.97 | 98.93 |
| chr7 | 20606313 | 20607575 | 1263  | 0.01 | C_unshiu_00258 | 284804 | 283539 | 1266  | 0.44  | 98.03 |

|      |          |          |       |      |                |        |        |       |       |       |
|------|----------|----------|-------|------|----------------|--------|--------|-------|-------|-------|
| chr7 | 20612121 | 20617421 | 5301  | 0.02 | C_unshiu_00028 | 428891 | 423623 | 5269  | 0.73  | 98.62 |
| chr7 | 20617422 | 20619638 | 2217  | 0.01 | C_unshiu_00491 | 86634  | 84418  | 2217  | 1.13  | 99.37 |
| chr7 | 20619704 | 20620743 | 1040  | 0    | C_unshiu_00491 | 80206  | 79167  | 1040  | 0.53  | 98.27 |
| chr7 | 20620741 | 20636798 | 16058 | 0.07 | C_unshiu_00028 | 423567 | 407497 | 16071 | 2.24  | 99.14 |
| chr7 | 20641601 | 20664412 | 22812 | 0.1  | C_unshiu_00031 | 21188  | 43969  | 22782 | 3.21  | 99.1  |
| chr7 | 20664424 | 20669355 | 4932  | 0.02 | C_unshiu_00031 | 44302  | 49180  | 4879  | 0.69  | 98.1  |
| chr7 | 20675861 | 20690228 | 14368 | 0.06 | C_unshiu_00524 | 177349 | 163019 | 14331 | 7.74  | 98.91 |
| chr7 | 20690228 | 20698761 | 8534  | 0.04 | C_unshiu_00524 | 163085 | 154553 | 8533  | 4.61  | 98.51 |
| chr7 | 20700694 | 20703450 | 2757  | 0.01 | C_unshiu_00587 | 57375  | 54616  | 2760  | 1.62  | 99.31 |
| chr7 | 20705197 | 20719118 | 13922 | 0.06 | C_unshiu_00482 | 179925 | 166025 | 13901 | 7.04  | 99.5  |
| chr7 | 20720271 | 20729436 | 9166  | 0.04 | C_unshiu_00482 | 164484 | 155319 | 9166  | 4.64  | 100   |
| chr7 | 20729437 | 20740067 | 10631 | 0.04 | C_unshiu_00482 | 154880 | 144313 | 10568 | 5.35  | 99.31 |
| chr7 | 20738228 | 20747547 | 9320  | 0.04 | C_unshiu_02684 | 20236  | 10919  | 9318  | 46.05 | 99.95 |
| chr7 | 20761225 | 20770556 | 9332  | 0.04 | C_unshiu_00414 | 187527 | 196855 | 9329  | 4.23  | 99.38 |
| chr7 | 20772044 | 20789007 | 16964 | 0.07 | C_unshiu_00414 | 198709 | 215661 | 16953 | 7.68  | 99.79 |
| chr7 | 20794771 | 20817950 | 23180 | 0.1  | C_unshiu_00071 | 474351 | 497481 | 23131 | 4.43  | 98.42 |
| chr7 | 20829550 | 20832006 | 2457  | 0.01 | C_unshiu_00071 | 511319 | 513767 | 2449  | 0.47  | 99.1  |
| chr7 | 20833966 | 20841994 | 8029  | 0.03 | C_unshiu_00421 | 216274 | 208255 | 8020  | 3.67  | 98.11 |
| chr7 | 20843386 | 20845278 | 1893  | 0.01 | C_unshiu_00421 | 205432 | 203534 | 1899  | 0.87  | 99.32 |
| chr7 | 20846437 | 20852783 | 6347  | 0.03 | C_unshiu_00421 | 201430 | 195069 | 6362  | 2.91  | 98.84 |
| chr7 | 20861124 | 20879739 | 18616 | 0.08 | C_unshiu_00421 | 185348 | 166787 | 18562 | 8.49  | 98.3  |
| chr7 | 20880003 | 20885319 | 5317  | 0.02 | C_unshiu_00421 | 165952 | 160637 | 5316  | 2.43  | 98.84 |
| chr7 | 20901125 | 20905690 | 4566  | 0.02 | C_unshiu_00153 | 257719 | 253154 | 4566  | 1.19  | 99.28 |
| chr7 | 20905693 | 20906738 | 1046  | 0    | C_unshiu_00421 | 146918 | 145864 | 1055  | 0.48  | 98.48 |
| chr7 | 20910126 | 20911422 | 1297  | 0.01 | C_unshiu_00421 | 142577 | 141280 | 1298  | 0.59  | 99.31 |
| chr7 | 20911429 | 20912916 | 1488  | 0.01 | C_unshiu_02203 | 19348  | 17873  | 1476  | 4.46  | 98.12 |
| chr7 | 20912216 | 20921786 | 9571  | 0.04 | C_unshiu_00421 | 140493 | 130912 | 9582  | 4.38  | 98.13 |
| chr7 | 20931088 | 20942128 | 11041 | 0.05 | C_unshiu_00421 | 120132 | 109136 | 10997 | 5.03  | 98.69 |
| chr7 | 20945889 | 20952373 | 6485  | 0.03 | C_unshiu_00421 | 104614 | 98139  | 6476  | 2.96  | 98.43 |
| chr7 | 20953184 | 20962685 | 9502  | 0.04 | C_unshiu_00147 | 369096 | 378599 | 9504  | 2.44  | 99    |
| chr7 | 20973059 | 20974934 | 1876  | 0.01 | C_unshiu_00925 | 100781 | 102656 | 1876  | 1.64  | 99.15 |
| chr7 | 20974938 | 20978904 | 3967  | 0.02 | C_unshiu_00925 | 103066 | 107030 | 3965  | 3.47  | 98.56 |
| chr7 | 20980840 | 20982904 | 2065  | 0.01 | C_unshiu_00925 | 109020 | 111074 | 2055  | 1.8   | 98.6  |
| chr7 | 20990283 | 21001401 | 11119 | 0.05 | C_unshiu_00925 | 89029  | 77862  | 11168 | 9.77  | 99.07 |
| chr7 | 21001591 | 21009535 | 7945  | 0.03 | C_unshiu_00925 | 77264  | 69316  | 7949  | 6.96  | 99.86 |
| chr7 | 21015773 | 21022608 | 6836  | 0.03 | C_unshiu_02404 | 19381  | 12616  | 6766  | 24.89 | 98.52 |
| chr7 | 21023602 | 21031084 | 7483  | 0.03 | C_unshiu_00925 | 60403  | 52950  | 7454  | 6.52  | 99    |
| chr7 | 21031113 | 21034816 | 3704  | 0.02 | C_unshiu_02404 | 3774   | 68     | 3707  | 13.63 | 99.14 |
| chr7 | 21038567 | 21045515 | 6949  | 0.03 | C_unshiu_00925 | 49345  | 42392  | 6954  | 6.08  | 99.08 |
| chr7 | 21046018 | 21051986 | 5969  | 0.03 | C_unshiu_00925 | 41458  | 35468  | 5991  | 5.24  | 98.8  |
| chr7 | 21052201 | 21058713 | 6513  | 0.03 | C_unshiu_00925 | 35698  | 29180  | 6519  | 5.7   | 98.81 |
| chr7 | 21060948 | 21065434 | 4487  | 0.02 | C_unshiu_00925 | 23981  | 19495  | 4487  | 3.93  | 99.98 |
| chr7 | 21065658 | 21067208 | 1551  | 0.01 | C_unshiu_00925 | 19127  | 17576  | 1552  | 1.36  | 99.68 |
| chr7 | 21072005 | 21083319 | 11315 | 0.05 | C_unshiu_00925 | 11430  | 67     | 11364 | 9.94  | 98.09 |
| chr7 | 21079850 | 21089141 | 9292  | 0.04 | C_unshiu_00384 | 179511 | 188769 | 9259  | 4.08  | 98.01 |
| chr7 | 21092300 | 21106369 | 14070 | 0.06 | C_unshiu_00384 | 191445 | 205515 | 14071 | 6.19  | 99.81 |
| chr7 | 21107104 | 21110437 | 3334  | 0.01 | C_unshiu_00384 | 207260 | 210593 | 3334  | 1.47  | 99.73 |
| chr7 | 21110751 | 21119105 | 8355  | 0.04 | C_unshiu_00384 | 211352 | 219648 | 8297  | 3.65  | 98.27 |
| chr7 | 21126853 | 21134291 | 7439  | 0.03 | C_unshiu_01656 | 33249  | 40693  | 7445  | 13.53 | 99.41 |
| chr7 | 21137882 | 21139198 | 1317  | 0.01 | C_unshiu_01656 | 45512  | 46828  | 1317  | 2.39  | 99.85 |
| chr7 | 21149967 | 21151281 | 1315  | 0.01 | C_unshiu_00582 | 46069  | 47383  | 1315  | 0.77  | 100   |
| chr7 | 21171035 | 21190957 | 19923 | 0.08 | C_unshiu_00582 | 67305  | 87247  | 19943 | 11.66 | 98.32 |
| chr7 | 21206452 | 21232978 | 26527 | 0.11 | C_unshiu_00582 | 103280 | 129914 | 26635 | 15.57 | 98.38 |
| chr7 | 21233519 | 21235710 | 2192  | 0.01 | C_unshiu_00582 | 149355 | 147164 | 2192  | 1.28  | 99.54 |
| chr7 | 21241223 | 21243696 | 2474  | 0.01 | C_unshiu_00582 | 145633 | 143158 | 2476  | 1.45  | 98.87 |
| chr7 | 21244533 | 21245884 | 1352  | 0.01 | C_unshiu_00582 | 141583 | 140229 | 1355  | 0.79  | 99.41 |
| chr7 | 21246425 | 21251434 | 5010  | 0.02 | C_unshiu_00582 | 139320 | 134307 | 5014  | 2.93  | 99.62 |
| chr7 | 21251422 | 21253996 | 2575  | 0.01 | C_unshiu_00582 | 133230 | 130663 | 2568  | 1.5   | 98.57 |
| chr7 | 21272654 | 21273829 | 1176  | 0    | C_unshiu_00635 | 74386  | 73211  | 1176  | 0.74  | 100   |
| chr7 | 21280095 | 21281921 | 1827  | 0.01 | C_unshiu_00272 | 45204  | 43378  | 1827  | 0.65  | 100   |
| chr7 | 21289591 | 21290811 | 1221  | 0.01 | C_unshiu_01170 | 88405  | 87184  | 1222  | 1.38  | 99.02 |
| chr7 | 21290965 | 21315675 | 24711 | 0.1  | C_unshiu_01170 | 86856  | 62165  | 24692 | 27.93 | 99.66 |
| chr7 | 21324021 | 21325648 | 1628  | 0.01 | C_unshiu_01170 | 49485  | 47858  | 1628  | 1.84  | 99.75 |
| chr7 | 21325935 | 21332788 | 6854  | 0.03 | C_unshiu_01170 | 41571  | 34716  | 6856  | 7.76  | 99.56 |
| chr7 | 21335737 | 21345876 | 10140 | 0.04 | C_unshiu_01170 | 32812  | 22617  | 10196 | 11.53 | 98.08 |
| chr7 | 21352472 | 21355146 | 2675  | 0.01 | C_unshiu_00410 | 6407   | 9081   | 2675  | 1.21  | 100   |
| chr7 | 21355421 | 21362298 | 6878  | 0.03 | C_unshiu_00410 | 9744   | 16580  | 6837  | 3.09  | 99.07 |
| chr7 | 21412698 | 21417230 | 4533  | 0.02 | C_unshiu_00016 | 367831 | 363268 | 4564  | 0.52  | 98.05 |
| chr7 | 21471390 | 21477900 | 6511  | 0.03 | C_unshiu_00016 | 309521 | 302978 | 6544  | 0.75  | 98.67 |
| chr7 | 21477835 | 21491011 | 13177 | 0.06 | C_unshiu_00016 | 302964 | 289821 | 13144 | 1.51  | 99.08 |
| chr7 | 21491030 | 21503337 | 12308 | 0.05 | C_unshiu_01981 | 26658  | 14349  | 12310 | 29.86 | 99.87 |
| chr7 | 21504172 | 21505838 | 1667  | 0.01 | C_unshiu_00016 | 283907 | 282241 | 1667  | 0.19  | 99.88 |
| chr7 | 21506582 | 21510417 | 3836  | 0.02 | C_unshiu_01981 | 11567  | 7759   | 3809  | 9.24  | 98.07 |
| chr7 | 21508429 | 21515320 | 6892  | 0.03 | C_unshiu_00016 | 278979 | 272093 | 6887  | 0.79  | 98.55 |
| chr7 | 21519005 | 21528805 | 9801  | 0.04 | C_unshiu_00016 | 268276 | 258453 | 9824  | 1.12  | 98.93 |
| chr7 | 21526966 | 21535478 | 8513  | 0.04 | C_unshiu_02029 | 1      | 8535   | 8535  | 21.57 | 98.1  |
| chr7 | 21576270 | 21589365 | 13096 | 0.06 | C_unshiu_00016 | 212055 | 198935 | 13121 | 1.5   | 98.35 |
| chr7 | 21595215 | 21597840 | 2626  | 0.01 | C_unshiu_00757 | 55312  | 57937  | 2626  | 1.94  | 100   |
| chr7 | 21597861 | 21609041 | 11181 | 0.05 | C_unshiu_00016 | 189318 | 178138 | 11181 | 1.28  | 99.86 |

|      |          |          |       |      |                |        |        |       |       |       |
|------|----------|----------|-------|------|----------------|--------|--------|-------|-------|-------|
| chr7 | 21609798 | 21612084 | 2287  | 0.01 | C_unshiu_00016 | 176999 | 174713 | 2287  | 0.26  | 98.86 |
| chr7 | 21611038 | 21613072 | 2035  | 0.01 | C_unshiu_00757 | 126644 | 128678 | 2035  | 1.51  | 98.28 |
| chr7 | 21613444 | 21617577 | 4134  | 0.02 | C_unshiu_00016 | 173030 | 168899 | 4132  | 0.47  | 99.18 |
| chr7 | 21619847 | 21637298 | 17452 | 0.07 | C_unshiu_00016 | 167161 | 149696 | 17466 | 2     | 98.54 |
| chr7 | 21646478 | 21661567 | 15090 | 0.06 | C_unshiu_00016 | 139387 | 124232 | 15156 | 1.74  | 98.42 |
| chr7 | 21650389 | 21666613 | 16225 | 0.07 | C_unshiu_00382 | 94521  | 110727 | 16207 | 7.09  | 98.94 |
| chr7 | 21666701 | 21689903 | 23203 | 0.1  | C_unshiu_00382 | 110727 | 133964 | 23238 | 10.16 | 99.15 |
| chr7 | 21725555 | 21727071 | 1517  | 0.01 | C_unshiu_00382 | 171651 | 173176 | 1526  | 0.67  | 98.23 |
| chr7 | 21728067 | 21733918 | 5852  | 0.02 | C_unshiu_02366 | 23100  | 17236  | 5865  | 20.98 | 98.01 |
| chr7 | 21734429 | 21736573 | 2145  | 0.01 | C_unshiu_00480 | 66316  | 64172  | 2145  | 1.08  | 100   |
| chr7 | 21741836 | 21745505 | 3670  | 0.02 | C_unshiu_02366 | 9883   | 6215   | 3669  | 13.13 | 99.78 |
| chr7 | 21761184 | 21765455 | 4272  | 0.02 | C_unshiu_00698 | 24414  | 20189  | 4226  | 2.94  | 98.67 |
| chr7 | 21766121 | 21772393 | 6273  | 0.03 | C_unshiu_01897 | 21457  | 27718  | 6262  | 13.98 | 98.95 |
| chr7 | 21771581 | 21780478 | 8898  | 0.04 | C_unshiu_00698 | 14080  | 5184   | 8897  | 6.19  | 99.63 |
| chr7 | 21780580 | 21782658 | 2079  | 0.01 | C_unshiu_00698 | 5071   | 2993   | 2079  | 1.45  | 100   |
| chr7 | 21783173 | 21785335 | 2163  | 0.01 | C_unshiu_00698 | 2131   | 1      | 2131  | 1.48  | 98.24 |
| chr7 | 21785587 | 21789127 | 3541  | 0.01 | C_unshiu_01897 | 32165  | 35700  | 3536  | 7.89  | 98.56 |
| chr7 | 21797114 | 21818271 | 21158 | 0.09 | C_unshiu_00634 | 10493  | 31670  | 21178 | 13.23 | 98.9  |
| chr7 | 21814225 | 21820440 | 6216  | 0.03 | C_unshiu_02787 | 7447   | 1233   | 6215  | 34.32 | 98.32 |
| chr7 | 21821438 | 21841512 | 20075 | 0.08 | C_unshiu_00634 | 35019  | 55101  | 20083 | 12.55 | 98.81 |
| chr7 | 21841555 | 21844999 | 3445  | 0.01 | C_unshiu_01284 | 63474  | 60031  | 3444  | 4.39  | 99.39 |
| chr7 | 21841972 | 21850327 | 8356  | 0.04 | C_unshiu_00634 | 55506  | 63861  | 8356  | 5.22  | 99.58 |
| chr7 | 21851596 | 21852900 | 1305  | 0.01 | C_unshiu_01284 | 58160  | 56856  | 1305  | 1.66  | 98.85 |
| chr7 | 21851599 | 21854763 | 3165  | 0.01 | C_unshiu_01998 | 28516  | 31701  | 3186  | 7.83  | 98.52 |
| chr7 | 21855195 | 21860434 | 5240  | 0.02 | C_unshiu_01998 | 33081  | 38306  | 5226  | 12.85 | 99.18 |
| chr7 | 21858859 | 21863098 | 4240  | 0.02 | C_unshiu_01284 | 46364  | 42124  | 4241  | 5.41  | 99.62 |
| chr7 | 21863260 | 21866205 | 2946  | 0.01 | C_unshiu_01284 | 42102  | 39155  | 2948  | 3.76  | 99.46 |
| chr7 | 21885130 | 21891096 | 5967  | 0.03 | C_unshiu_01570 | 5277   | 11256  | 5980  | 10.11 | 98.56 |
| chr7 | 21892595 | 21898547 | 5953  | 0.03 | C_unshiu_01570 | 13189  | 19122  | 5934  | 10.03 | 98.96 |
| chr7 | 21904146 | 21908244 | 4099  | 0.02 | C_unshiu_01570 | 21681  | 25792  | 4112  | 6.95  | 98.45 |
| chr7 | 21908834 | 21910419 | 1586  | 0.01 | C_unshiu_01570 | 26204  | 27789  | 1586  | 2.68  | 100   |
| chr7 | 21914199 | 21918777 | 4579  | 0.02 | C_unshiu_01570 | 30783  | 35382  | 4600  | 7.77  | 98.76 |
| chr7 | 21917246 | 21934816 | 17571 | 0.07 | C_unshiu_00173 | 364720 | 347155 | 17566 | 4.82  | 99.84 |
| chr7 | 21934816 | 21939092 | 4277  | 0.02 | C_unshiu_00173 | 347199 | 342930 | 4270  | 1.17  | 98.74 |
| chr7 | 21940289 | 21947524 | 7236  | 0.03 | C_unshiu_01539 | 16771  | 24027  | 7257  | 11.88 | 99.1  |
| chr7 | 21948680 | 21956834 | 8155  | 0.03 | C_unshiu_01539 | 26883  | 35037  | 8155  | 13.35 | 99.89 |
| chr7 | 21959987 | 21968461 | 8475  | 0.04 | C_unshiu_01539 | 37036  | 45510  | 8475  | 13.87 | 99.81 |
| chr7 | 21970157 | 21972974 | 2818  | 0.01 | C_unshiu_01539 | 46133  | 48965  | 2833  | 4.64  | 99.47 |
| chr7 | 21974326 | 21976825 | 2500  | 0.01 | C_unshiu_01539 | 49414  | 51908  | 2495  | 4.08  | 98.52 |
| chr7 | 21975849 | 21989823 | 13975 | 0.06 | C_unshiu_01539 | 4      | 13976  | 13973 | 22.87 | 99.91 |
| chr7 | 21989828 | 21991431 | 1604  | 0.01 | C_unshiu_01570 | 38935  | 40538  | 1604  | 2.71  | 100   |
| chr7 | 21991694 | 21995178 | 3485  | 0.01 | C_unshiu_00173 | 341667 | 338184 | 3484  | 0.96  | 99.86 |
| chr7 | 21996896 | 21998738 | 1843  | 0.01 | C_unshiu_00173 | 337596 | 335755 | 1842  | 0.51  | 99.95 |
| chr7 | 22002742 | 22004933 | 2192  | 0.01 | C_unshiu_00173 | 329215 | 327024 | 2192  | 0.6   | 99.91 |
| chr7 | 22006770 | 22022462 | 15693 | 0.07 | C_unshiu_00173 | 324358 | 308667 | 15692 | 4.3   | 99.98 |
| chr7 | 22024858 | 22030506 | 5649  | 0.02 | C_unshiu_01570 | 49629  | 55277  | 5649  | 9.55  | 99.33 |
| chr7 | 22031116 | 22033658 | 2543  | 0.01 | C_unshiu_00173 | 305006 | 302464 | 2543  | 0.7   | 100   |
| chr7 | 22038921 | 22049351 | 10431 | 0.04 | C_unshiu_00173 | 296214 | 285769 | 10446 | 2.86  | 98.48 |
| chr7 | 22051099 | 22055280 | 4182  | 0.02 | C_unshiu_00173 | 285089 | 280896 | 4194  | 1.15  | 98.12 |
| chr7 | 22055899 | 22058787 | 2889  | 0.01 | C_unshiu_00173 | 279520 | 276629 | 2892  | 0.79  | 99.45 |
| chr7 | 22058725 | 22066238 | 7514  | 0.03 | C_unshiu_00173 | 276631 | 269093 | 7539  | 2.07  | 98.64 |
| chr7 | 22066031 | 22073992 | 7962  | 0.03 | C_unshiu_00173 | 269204 | 261252 | 7953  | 2.18  | 98.55 |
| chr7 | 22079286 | 22130654 | 51369 | 0.22 | C_unshiu_00173 | 256740 | 205367 | 51374 | 14.09 | 99.04 |
| chr7 | 22130671 | 22150766 | 20096 | 0.08 | C_unshiu_00173 | 205586 | 185519 | 20068 | 5.5   | 99.69 |
| chr7 | 22152760 | 22159284 | 6525  | 0.03 | C_unshiu_00173 | 183099 | 176575 | 6525  | 1.79  | 100   |
| chr7 | 22159633 | 22160699 | 1067  | 0    | C_unshiu_00173 | 175967 | 174901 | 1067  | 0.29  | 100   |
| chr7 | 22163803 | 22165940 | 2138  | 0.01 | C_unshiu_00173 | 170890 | 168754 | 2137  | 0.59  | 99.77 |
| chr7 | 22168831 | 22169959 | 1129  | 0    | C_unshiu_00616 | 118992 | 120119 | 1128  | 0.69  | 98.41 |
| chr7 | 22195937 | 22210524 | 14588 | 0.06 | C_unshiu_00616 | 147585 | 162142 | 14558 | 8.88  | 98.48 |
| chr7 | 22211451 | 22212578 | 1128  | 0    | C_unshiu_00616 | 162808 | 163935 | 1128  | 0.69  | 100   |
| chr7 | 22228279 | 22233364 | 5086  | 0.02 | C_unshiu_00834 | 1      | 5087   | 5087  | 4.08  | 99.25 |
| chr7 | 22248699 | 22256899 | 8201  | 0.03 | C_unshiu_00661 | 70305  | 78521  | 8217  | 5.36  | 99.77 |
| chr7 | 22256900 | 22261189 | 4290  | 0.02 | C_unshiu_00661 | 78802  | 83091  | 4290  | 2.8   | 99.98 |
| chr7 | 22261458 | 22263652 | 2195  | 0.01 | C_unshiu_00661 | 83852  | 86049  | 2198  | 1.43  | 99.45 |
| chr7 | 22286929 | 22300730 | 13802 | 0.06 | C_unshiu_00661 | 89073  | 102874 | 13802 | 9     | 99.88 |
| chr7 | 22302419 | 22306901 | 4483  | 0.02 | C_unshiu_00661 | 105079 | 109562 | 4484  | 2.92  | 99.87 |
| chr7 | 22311161 | 22315579 | 4419  | 0.02 | C_unshiu_00661 | 113268 | 117680 | 4413  | 2.88  | 99.82 |
| chr7 | 22315579 | 22328130 | 12552 | 0.05 | C_unshiu_00661 | 141569 | 128943 | 12627 | 8.23  | 98.28 |
| chr7 | 22331676 | 22344679 | 13004 | 0.05 | C_unshiu_00434 | 147742 | 134727 | 13016 | 6.09  | 99.27 |
| chr7 | 22343701 | 22350326 | 6626  | 0.03 | C_unshiu_02364 | 13989  | 20593  | 6605  | 23.58 | 99.14 |
| chr7 | 22356863 | 22358304 | 1442  | 0.01 | C_unshiu_02364 | 26570  | 28010  | 1441  | 5.14  | 98.96 |
| chr7 | 22368916 | 22370158 | 1243  | 0.01 | C_unshiu_00646 | 135414 | 134172 | 1243  | 0.79  | 100   |
| chr7 | 22370151 | 22376822 | 6672  | 0.03 | C_unshiu_01108 | 43221  | 36548  | 6674  | 7     | 99.97 |
| chr7 | 22376841 | 22395628 | 18788 | 0.08 | C_unshiu_01108 | 35767  | 16999  | 18769 | 19.68 | 99.42 |
| chr7 | 22397179 | 22398843 | 1665  | 0.01 | C_unshiu_01108 | 709    | 2373   | 1665  | 1.75  | 98.14 |
| chr7 | 22399248 | 22403049 | 3802  | 0.02 | C_unshiu_01108 | 15844  | 12080  | 3765  | 3.95  | 98.16 |
| chr7 | 22403497 | 22415798 | 12302 | 0.05 | C_unshiu_00434 | 116511 | 104193 | 12319 | 5.76  | 99.33 |
| chr7 | 22415946 | 22425890 | 9945  | 0.04 | C_unshiu_00434 | 103494 | 93583  | 9912  | 4.64  | 98    |
| chr7 | 22426148 | 22444842 | 18695 | 0.08 | C_unshiu_00434 | 92028  | 73303  | 18726 | 8.76  | 98.46 |

|      |          |          |       |      |                |        |        |       |       |       |
|------|----------|----------|-------|------|----------------|--------|--------|-------|-------|-------|
| chr7 | 22445967 | 22458475 | 12509 | 0.05 | C_unshiu_00434 | 72255  | 59736  | 12520 | 5.86  | 99.36 |
| chr7 | 22459950 | 22463228 | 3279  | 0.01 | C_unshiu_00434 | 54893  | 51608  | 3286  | 1.54  | 98    |
| chr7 | 22485169 | 22492091 | 6923  | 0.03 | C_unshiu_00434 | 32679  | 25754  | 6926  | 3.24  | 99.93 |
| chr7 | 22492698 | 22502345 | 9648  | 0.04 | C_unshiu_00434 | 24551  | 14899  | 9653  | 4.52  | 99.89 |
| chr7 | 22502429 | 22514337 | 11909 | 0.05 | C_unshiu_00434 | 14744  | 2910   | 11835 | 5.54  | 98.83 |
| chr7 | 22515098 | 22516676 | 1579  | 0.01 | C_unshiu_00854 | 31414  | 33005  | 1592  | 1.3   | 98.3  |
| chr7 | 22516683 | 22520028 | 3346  | 0.01 | C_unshiu_00854 | 33548  | 36893  | 3346  | 2.74  | 100   |
| chr7 | 22523565 | 22524679 | 1115  | 0    | C_unshiu_01312 | 45365  | 44250  | 1116  | 1.47  | 99.73 |
| chr7 | 22526460 | 22527563 | 1104  | 0    | C_unshiu_01193 | 47273  | 46169  | 1105  | 1.28  | 99.37 |
| chr7 | 22533736 | 22537791 | 4056  | 0.02 | C_unshiu_00174 | 254646 | 258702 | 4057  | 1.11  | 98.75 |
| chr7 | 22542225 | 22553708 | 11484 | 0.05 | C_unshiu_00174 | 269072 | 280518 | 11447 | 3.14  | 99.25 |
| chr7 | 22561512 | 22574996 | 13485 | 0.06 | C_unshiu_00219 | 1      | 13452  | 13452 | 4.25  | 99.61 |
| chr7 | 22586606 | 22589889 | 3284  | 0.01 | C_unshiu_01372 | 14271  | 17555  | 3285  | 4.51  | 99.85 |
| chr7 | 22594309 | 22606318 | 12010 | 0.05 | C_unshiu_01372 | 21123  | 33117  | 11995 | 16.48 | 99.77 |
| chr7 | 22609910 | 22612652 | 2743  | 0.01 | C_unshiu_01372 | 38550  | 41292  | 2743  | 3.77  | 100   |
| chr7 | 22615151 | 22625724 | 10574 | 0.04 | C_unshiu_01372 | 43718  | 54307  | 10590 | 14.55 | 98.82 |
| chr7 | 22625597 | 22627228 | 1632  | 0.01 | C_unshiu_01372 | 54334  | 55965  | 1632  | 2.24  | 100   |
| chr7 | 22650347 | 22651953 | 1607  | 0.01 | C_unshiu_00405 | 182014 | 180408 | 1607  | 0.72  | 100   |
| chr7 | 22651975 | 22654109 | 2135  | 0.01 | C_unshiu_00405 | 180166 | 178032 | 2135  | 0.96  | 100   |
| chr7 | 22680763 | 22689482 | 8720  | 0.04 | C_unshiu_00272 | 124743 | 133474 | 8732  | 3.12  | 99.38 |
| chr7 | 22689648 | 22693170 | 3523  | 0.01 | C_unshiu_00272 | 133902 | 137425 | 3524  | 1.26  | 99.97 |
| chr7 | 22694985 | 22698544 | 3560  | 0.01 | C_unshiu_00272 | 173395 | 140979 | 3585  | 1.28  | 98.36 |
| chr7 | 22700158 | 22702022 | 1865  | 0.01 | C_unshiu_00272 | 143312 | 145176 | 1865  | 0.67  | 99.09 |
| chr7 | 22708702 | 22711806 | 3105  | 0.01 | C_unshiu_00272 | 151389 | 154493 | 3105  | 1.11  | 99.03 |
| chr7 | 22712460 | 22714026 | 1567  | 0.01 | C_unshiu_00498 | 17245  | 18810  | 1566  | 0.81  | 98.79 |
| chr7 | 22715496 | 22720956 | 5461  | 0.02 | C_unshiu_00272 | 158392 | 163868 | 5477  | 1.96  | 98.98 |
| chr7 | 22720060 | 22726676 | 6617  | 0.03 | C_unshiu_00272 | 163877 | 170525 | 6649  | 2.37  | 98.05 |
| chr7 | 22726678 | 22736502 | 9825  | 0.04 | C_unshiu_00272 | 170620 | 180473 | 9854  | 3.52  | 98.71 |
| chr7 | 22736588 | 22752153 | 15566 | 0.07 | C_unshiu_00272 | 180901 | 196525 | 15625 | 5.58  | 98.28 |
| chr7 | 22753677 | 22768121 | 14445 | 0.06 | C_unshiu_00272 | 197347 | 211809 | 14463 | 5.16  | 98.07 |
| chr7 | 22775961 | 22778363 | 2403  | 0.01 | C_unshiu_01663 | 54479  | 52071  | 2409  | 4.42  | 99.34 |
| chr7 | 22783114 | 22824944 | 41831 | 0.18 | C_unshiu_01663 | 43824  | 1994   | 41831 | 76.78 | 99.99 |
| chr7 | 22825114 | 22827116 | 2003  | 0.01 | C_unshiu_00272 | 228412 | 230432 | 2021  | 0.72  | 98.27 |
| chr7 | 22827484 | 22835966 | 8483  | 0.04 | C_unshiu_00272 | 231182 | 239679 | 8498  | 3.03  | 98.32 |
| chr7 | 22836714 | 22850947 | 14234 | 0.06 | C_unshiu_00272 | 239675 | 253927 | 14253 | 5.09  | 98.67 |
| chr7 | 22851706 | 22853480 | 1775  | 0.01 | C_unshiu_00272 | 255115 | 256891 | 1777  | 0.63  | 98.04 |
| chr7 | 22854283 | 22877121 | 22839 | 0.1  | C_unshiu_00272 | 257263 | 280056 | 22794 | 8.14  | 99.6  |
| chr7 | 22883038 | 22884295 | 1258  | 0.01 | C_unshiu_01111 | 39229  | 37967  | 1263  | 1.33  | 98.18 |
| chr7 | 22906850 | 22916445 | 9596  | 0.04 | C_unshiu_01916 | 1      | 9597   | 9597  | 21.76 | 99.64 |
| chr7 | 22916095 | 22922074 | 5980  | 0.03 | C_unshiu_01367 | 66515  | 72501  | 5987  | 8.18  | 99.7  |
| chr7 | 22926935 | 22933820 | 6886  | 0.03 | C_unshiu_00591 | 24599  | 17695  | 6905  | 4.07  | 99.46 |
| chr7 | 22934973 | 22936028 | 1056  | 0    | C_unshiu_00591 | 17742  | 16694  | 1049  | 0.62  | 98.86 |
| chr7 | 22936028 | 22938133 | 2106  | 0.01 | C_unshiu_00857 | 30204  | 32308  | 2105  | 1.72  | 99.95 |
| chr7 | 22942879 | 22945978 | 3100  | 0.01 | C_unshiu_00857 | 39406  | 42505  | 3100  | 2.54  | 99.61 |
| chr7 | 22961328 | 22966585 | 5258  | 0.02 | C_unshiu_01041 | 1      | 5258   | 5258  | 5.16  | 99.87 |
| chr7 | 22969252 | 22970497 | 1246  | 0.01 | C_unshiu_01041 | 7991   | 9247   | 1257  | 1.23  | 98.33 |
| chr7 | 22973966 | 22976740 | 2775  | 0.01 | C_unshiu_01041 | 9375   | 12167  | 2793  | 2.74  | 98.68 |
| chr7 | 23000429 | 23011692 | 11264 | 0.05 | C_unshiu_01041 | 20169  | 31449  | 11281 | 11.07 | 98.57 |
| chr7 | 23012651 | 23015424 | 2774  | 0.01 | C_unshiu_01041 | 32283  | 35081  | 2799  | 2.75  | 98.07 |
| chr7 | 23022175 | 23024758 | 2584  | 0.01 | C_unshiu_01041 | 41899  | 44483  | 2585  | 2.54  | 99.15 |
| chr7 | 23027648 | 23049009 | 21362 | 0.09 | C_unshiu_01041 | 51186  | 72542  | 21357 | 20.95 | 99.16 |
| chr7 | 23049964 | 23054878 | 4915  | 0.02 | C_unshiu_01041 | 73975  | 78889  | 4915  | 4.82  | 100   |
| chr7 | 23057146 | 23059382 | 2237  | 0.01 | C_unshiu_01041 | 79984  | 82212  | 2229  | 2.19  | 98.35 |
| chr7 | 23062480 | 23063737 | 1258  | 0.01 | C_unshiu_02082 | 4918   | 3661   | 1258  | 3.38  | 100   |
| chr7 | 23063942 | 23067534 | 3593  | 0.02 | C_unshiu_02082 | 3593   | 1      | 3593  | 9.64  | 99.58 |
| chr7 | 23072162 | 23077292 | 5131  | 0.02 | C_unshiu_01041 | 93352  | 98499  | 5148  | 5.05  | 98.52 |
| chr7 | 23077011 | 23080652 | 3642  | 0.02 | C_unshiu_00650 | 1      | 3645   | 3645  | 2.33  | 99.31 |
| chr7 | 23082976 | 23089230 | 6255  | 0.03 | C_unshiu_00650 | 5929   | 12160  | 6232  | 3.98  | 98.99 |
| chr7 | 23089245 | 23098166 | 8922  | 0.04 | C_unshiu_00650 | 12508  | 21378  | 8871  | 5.67  | 98.87 |
| chr7 | 23099695 | 23104340 | 4646  | 0.02 | C_unshiu_00650 | 23437  | 28095  | 4659  | 2.98  | 98.95 |
| chr7 | 23135804 | 23143408 | 7605  | 0.03 | C_unshiu_00650 | 58322  | 65977  | 7656  | 4.89  | 98.46 |
| chr7 | 23144488 | 23146924 | 2437  | 0.01 | C_unshiu_00650 | 67709  | 70147  | 2439  | 1.56  | 99.75 |
| chr7 | 23147265 | 23149307 | 2043  | 0.01 | C_unshiu_00650 | 65954  | 68002  | 2049  | 1.31  | 98.15 |
| chr7 | 23151790 | 23154634 | 2845  | 0.01 | C_unshiu_00650 | 70394  | 73257  | 2864  | 1.83  | 98.01 |
| chr7 | 23166743 | 23175744 | 9002  | 0.04 | C_unshiu_00650 | 85137  | 94120  | 8984  | 5.74  | 98.27 |
| chr7 | 23185572 | 23187045 | 1474  | 0.01 | C_unshiu_02682 | 18568  | 17097  | 1472  | 7.27  | 98.98 |
| chr7 | 23193162 | 23199344 | 6183  | 0.03 | C_unshiu_02682 | 16397  | 10222  | 6176  | 30.51 | 99.21 |
| chr7 | 23201215 | 23206246 | 5032  | 0.02 | C_unshiu_00713 | 569    | 5577   | 5009  | 3.53  | 98.47 |
| chr7 | 23207237 | 23210087 | 2851  | 0.01 | C_unshiu_00713 | 7157   | 10009  | 2853  | 2.01  | 99.05 |
| chr7 | 23213380 | 23217232 | 3853  | 0.02 | C_unshiu_00713 | 12199  | 16051  | 3853  | 2.71  | 98.99 |
| chr7 | 23218072 | 23219871 | 1800  | 0.01 | C_unshiu_00019 | 35924  | 34126  | 1799  | 0.21  | 99.72 |
| chr7 | 23226357 | 23234924 | 8568  | 0.04 | C_unshiu_01382 | 66845  | 58312  | 8534  | 11.95 | 98.44 |
| chr7 | 23236788 | 23253638 | 16851 | 0.07 | C_unshiu_01382 | 55843  | 39013  | 16831 | 23.56 | 98.75 |
| chr7 | 23257914 | 23259763 | 1850  | 0.01 | C_unshiu_01382 | 34769  | 32920  | 1850  | 2.59  | 100   |
| chr7 | 23260296 | 23261326 | 1031  | 0    | C_unshiu_01382 | 14972  | 13942  | 1031  | 1.44  | 100   |
| chr7 | 23266456 | 23268050 | 1595  | 0.01 | C_unshiu_01382 | 13316  | 11724  | 1593  | 2.23  | 98.75 |
| chr7 | 23271824 | 23276771 | 4948  | 0.02 | C_unshiu_01382 | 23933  | 18988  | 4946  | 6.92  | 99.29 |
| chr7 | 23276772 | 23280581 | 3810  | 0.02 | C_unshiu_01382 | 18688  | 14898  | 3791  | 5.31  | 98.87 |
| chr7 | 23287171 | 23290834 | 3664  | 0.02 | C_unshiu_02537 | 17518  | 13856  | 3663  | 15.47 | 99.89 |

|      |          |          |       |      |                |         |         |       |       |       |
|------|----------|----------|-------|------|----------------|---------|---------|-------|-------|-------|
| chr7 | 23291382 | 23293883 | 2502  | 0.01 | C_unshiu_03131 | 4028    | 6520    | 2493  | 35.78 | 99.4  |
| chr7 | 23308558 | 23315660 | 7103  | 0.03 | C_unshiu_00622 | 8224    | 1165    | 7060  | 4.34  | 98.12 |
| chr7 | 23316108 | 23318201 | 2094  | 0.01 | C_unshiu_00622 | 18097   | 20186   | 2090  | 1.29  | 99    |
| chr7 | 23318168 | 23342843 | 24676 | 0.1  | C_unshiu_00622 | 20222   | 45025   | 24804 | 15.25 | 98.94 |
| chr7 | 23381810 | 23392801 | 10992 | 0.05 | C_unshiu_00622 | 78661   | 89674   | 11014 | 6.77  | 99.24 |
| chr7 | 23405649 | 23418141 | 12493 | 0.05 | C_unshiu_00622 | 99650   | 112141  | 12492 | 7.68  | 99.35 |
| chr7 | 23438186 | 23453661 | 15476 | 0.07 | C_unshiu_00622 | 131794  | 147315  | 15522 | 9.55  | 98.84 |
| chr7 | 23454201 | 23466579 | 12379 | 0.05 | C_unshiu_00940 | 111846  | 99482   | 12365 | 11.01 | 98.23 |
| chr7 | 23481844 | 23495848 | 14005 | 0.06 | C_unshiu_00940 | 85408   | 71362   | 14047 | 12.5  | 98.08 |
| chr7 | 23496025 | 23516723 | 20699 | 0.09 | C_unshiu_00940 | 71320   | 50614   | 20707 | 18.43 | 99.44 |
| chr7 | 23518185 | 23519984 | 1800  | 0.01 | C_unshiu_00940 | 48007   | 46184   | 1824  | 1.62  | 98.14 |
| chr7 | 23525307 | 23528338 | 3032  | 0.01 | C_unshiu_00940 | 42265   | 39245   | 3021  | 2.69  | 98.69 |
| chr7 | 23529661 | 23538644 | 8984  | 0.04 | C_unshiu_01159 | 82961   | 73972   | 8990  | 10    | 99.66 |
| chr7 | 23539958 | 23547689 | 7732  | 0.03 | C_unshiu_01159 | 71483   | 63689   | 7795  | 8.67  | 98.53 |
| chr7 | 23547689 | 23563498 | 15810 | 0.07 | C_unshiu_01159 | 63283   | 47409   | 15875 | 17.66 | 98.33 |
| chr7 | 23567449 | 23577047 | 9599  | 0.04 | C_unshiu_01159 | 44751   | 35213   | 9539  | 10.61 | 98.22 |
| chr7 | 23599667 | 23600671 | 1005  | 0    | C_unshiu_00001 | 2594658 | 2593654 | 1005  | 0.04  | 100   |
| chr7 | 23601953 | 23604125 | 2173  | 0.01 | C_unshiu_00001 | 2591302 | 2589124 | 2179  | 0.08  | 99.5  |
| chr7 | 23632346 | 23637939 | 5594  | 0.02 | C_unshiu_02885 | 16071   | 10478   | 5594  | 34.81 | 100   |
| chr7 | 23641714 | 23645732 | 4019  | 0.02 | C_unshiu_00001 | 2594371 | 2598411 | 4041  | 0.15  | 98.89 |
| chr7 | 23645744 | 23647780 | 2037  | 0.01 | C_unshiu_00001 | 2598670 | 2600696 | 2027  | 0.08  | 98.44 |
| chr7 | 23647843 | 23657364 | 9522  | 0.04 | C_unshiu_00001 | 2600808 | 2610352 | 9545  | 0.36  | 98.19 |
| chr7 | 23659068 | 23680326 | 21259 | 0.09 | C_unshiu_00001 | 2611545 | 2632722 | 21178 | 0.79  | 98.49 |
| chr7 | 23680323 | 23706959 | 26637 | 0.11 | C_unshiu_00001 | 2633340 | 2660034 | 26695 | 1     | 98.26 |
| chr7 | 23701907 | 23718933 | 17027 | 0.07 | C_unshiu_00285 | 46583   | 29478   | 17106 | 6.24  | 98.37 |
| chr7 | 23733541 | 23734688 | 1148  | 0    | C_unshiu_00285 | 15470   | 14323   | 1148  | 0.42  | 100   |
| chr8 | 1734     | 7157     | 5424  | 0.02 | C_unshiu_00252 | 153384  | 158801  | 5418  | 1.84  | 98.17 |
| chr8 | 7179     | 8274     | 1096  | 0    | C_unshiu_00252 | 159357  | 160454  | 1098  | 0.37  | 99.82 |
| chr8 | 13236    | 48005    | 34770 | 0.15 | C_unshiu_00252 | 160448  | 195153  | 34706 | 11.77 | 99.46 |
| chr8 | 48723    | 60509    | 11787 | 0.05 | C_unshiu_00252 | 196269  | 208055  | 11787 | 4     | 99.5  |
| chr8 | 61657    | 106181   | 44525 | 0.19 | C_unshiu_00252 | 208696  | 253238  | 44543 | 15.11 | 99.07 |
| chr8 | 106191   | 125093   | 18903 | 0.08 | C_unshiu_00252 | 254068  | 272895  | 18828 | 6.39  | 98.95 |
| chr8 | 125106   | 128297   | 3192  | 0.01 | C_unshiu_00741 | 30144   | 33335   | 3192  | 2.32  | 99.78 |
| chr8 | 127795   | 139126   | 11332 | 0.05 | C_unshiu_00252 | 279162  | 290418  | 11257 | 3.82  | 98.73 |
| chr8 | 139475   | 143101   | 3627  | 0.02 | C_unshiu_00741 | 39653   | 43256   | 3604  | 2.62  | 98.29 |
| chr8 | 143094   | 156950   | 13857 | 0.06 | C_unshiu_00741 | 43694   | 57555   | 13862 | 10.09 | 99.71 |
| chr8 | 182183   | 192674   | 10492 | 0.04 | C_unshiu_00433 | 196496  | 186012  | 10485 | 4.9   | 99.35 |
| chr8 | 192667   | 203495   | 10829 | 0.05 | C_unshiu_00433 | 185826  | 174974  | 10853 | 5.07  | 98.09 |
| chr8 | 203487   | 211264   | 7778  | 0.03 | C_unshiu_00433 | 174327  | 166539  | 7789  | 3.64  | 99.31 |
| chr8 | 211637   | 219576   | 7940  | 0.03 | C_unshiu_00433 | 166622  | 158654  | 7969  | 3.73  | 99.26 |
| chr8 | 220660   | 239173   | 18514 | 0.08 | C_unshiu_00433 | 156984  | 138309  | 18676 | 8.73  | 98.42 |
| chr8 | 245200   | 263766   | 18567 | 0.08 | C_unshiu_00433 | 138322  | 119676  | 18647 | 8.72  | 98.73 |
| chr8 | 264263   | 275237   | 10975 | 0.05 | C_unshiu_00433 | 119665  | 108682  | 10984 | 5.13  | 98.81 |
| chr8 | 277700   | 283062   | 5363  | 0.02 | C_unshiu_00433 | 106715  | 101326  | 5390  | 2.52  | 98.54 |
| chr8 | 283386   | 284621   | 1236  | 0.01 | C_unshiu_01399 | 13703   | 14938   | 1236  | 1.76  | 100   |
| chr8 | 284799   | 313136   | 28338 | 0.12 | C_unshiu_00433 | 101138  | 72654   | 28485 | 13.32 | 98.75 |
| chr8 | 313768   | 341422   | 27655 | 0.12 | C_unshiu_00433 | 73240   | 45589   | 27652 | 12.93 | 99.09 |
| chr8 | 328175   | 346257   | 18083 | 0.08 | C_unshiu_00775 | 6511    | 24610   | 18100 | 13.7  | 98.52 |
| chr8 | 346286   | 358446   | 12161 | 0.05 | C_unshiu_00775 | 26911   | 39040   | 12130 | 9.18  | 98.86 |
| chr8 | 358689   | 359952   | 1264  | 0.01 | C_unshiu_00775 | 39033   | 40296   | 1264  | 0.96  | 99.68 |
| chr8 | 361032   | 364479   | 3448  | 0.01 | C_unshiu_00775 | 47490   | 50937   | 3448  | 2.61  | 99.88 |
| chr8 | 367508   | 374430   | 6923  | 0.03 | C_unshiu_00775 | 52961   | 59869   | 6909  | 5.23  | 98.53 |
| chr8 | 374683   | 377503   | 2821  | 0.01 | C_unshiu_00775 | 60445   | 63265   | 2821  | 2.14  | 100   |
| chr8 | 380496   | 382289   | 1794  | 0.01 | C_unshiu_00324 | 89702   | 87907   | 1796  | 0.7   | 99.72 |
| chr8 | 382266   | 401032   | 18767 | 0.08 | C_unshiu_00775 | 67675   | 86372   | 18698 | 14.15 | 99.31 |
| chr8 | 401037   | 408557   | 7521  | 0.03 | C_unshiu_00775 | 86590   | 94109   | 7520  | 5.69  | 99.99 |
| chr8 | 408646   | 412811   | 4166  | 0.02 | C_unshiu_00775 | 94433   | 98598   | 4166  | 3.15  | 100   |
| chr8 | 418106   | 427612   | 9507  | 0.04 | C_unshiu_00161 | 277879  | 287346  | 9468  | 2.55  | 99.47 |
| chr8 | 427156   | 438683   | 11528 | 0.05 | C_unshiu_00161 | 287345  | 298872  | 11528 | 3.1   | 99.98 |
| chr8 | 438702   | 449515   | 10814 | 0.05 | C_unshiu_00161 | 299193  | 309988  | 10796 | 2.9   | 99.58 |
| chr8 | 453587   | 459944   | 6358  | 0.03 | C_unshiu_00161 | 313768  | 320125  | 6358  | 1.71  | 100   |
| chr8 | 459939   | 463347   | 3409  | 0.01 | C_unshiu_00600 | 52830   | 56238   | 3409  | 2.03  | 100   |
| chr8 | 464282   | 474713   | 10432 | 0.04 | C_unshiu_00161 | 323594  | 334023  | 10430 | 2.8   | 99.67 |
| chr8 | 475705   | 479197   | 3493  | 0.01 | C_unshiu_00161 | 335516  | 339003  | 3488  | 0.94  | 98.52 |
| chr8 | 479600   | 489151   | 9552  | 0.04 | C_unshiu_00161 | 339790  | 349343  | 9554  | 2.57  | 99.94 |
| chr8 | 495598   | 498751   | 3154  | 0.01 | C_unshiu_00095 | 170972  | 174119  | 3148  | 0.68  | 99.21 |
| chr8 | 502306   | 504127   | 1822  | 0.01 | C_unshiu_00558 | 141564  | 143385  | 1822  | 1.03  | 100   |
| chr8 | 504128   | 505921   | 1794  | 0.01 | C_unshiu_01777 | 38840   | 37046   | 1795  | 3.63  | 99.44 |
| chr8 | 519549   | 521314   | 1766  | 0.01 | C_unshiu_00527 | 13413   | 11648   | 1766  | 0.96  | 100   |
| chr8 | 521308   | 532471   | 11164 | 0.05 | C_unshiu_00478 | 185571  | 174399  | 11173 | 5.63  | 99.86 |
| chr8 | 533191   | 534845   | 1655  | 0.01 | C_unshiu_02260 | 2727    | 4365    | 1639  | 5.25  | 98.31 |
| chr8 | 535037   | 547335   | 12299 | 0.05 | C_unshiu_00478 | 171215  | 158896  | 12320 | 6.2   | 99.49 |
| chr8 | 544467   | 547682   | 3216  | 0.01 | C_unshiu_00095 | 161637  | 158411  | 3227  | 0.69  | 98.24 |
| chr8 | 554024   | 556209   | 2186  | 0.01 | C_unshiu_00095 | 153029  | 150829  | 2201  | 0.47  | 98.73 |
| chr8 | 582602   | 587228   | 4627  | 0.02 | C_unshiu_00095 | 118592  | 113932  | 4661  | 1     | 98.73 |
| chr8 | 587235   | 600808   | 13574 | 0.06 | C_unshiu_00095 | 108470  | 94863   | 13608 | 2.93  | 99.12 |
| chr8 | 601073   | 619088   | 18016 | 0.08 | C_unshiu_00095 | 94866   | 76826   | 18041 | 3.88  | 98.27 |
| chr8 | 619086   | 630771   | 11686 | 0.05 | C_unshiu_00095 | 76644   | 64964   | 11681 | 2.51  | 98.44 |
| chr8 | 635560   | 636666   | 1107  | 0    | C_unshiu_00751 | 14807   | 15913   | 1107  | 0.81  | 99.91 |

|      |         |         |       |      |                |        |        |       |       |       |
|------|---------|---------|-------|------|----------------|--------|--------|-------|-------|-------|
| chr8 | 655494  | 663616  | 8123  | 0.03 | C_unshiu_00016 | 394001 | 385879 | 8123  | 0.93  | 99.99 |
| chr8 | 664393  | 670862  | 6470  | 0.03 | C_unshiu_00016 | 384578 | 378109 | 6470  | 0.74  | 99.95 |
| chr8 | 671998  | 673256  | 1259  | 0.01 | C_unshiu_00016 | 376423 | 375164 | 1260  | 0.14  | 99.92 |
| chr8 | 682199  | 700524  | 18326 | 0.08 | C_unshiu_00271 | 144828 | 163153 | 18326 | 6.54  | 99.86 |
| chr8 | 701185  | 711212  | 10028 | 0.04 | C_unshiu_00271 | 163603 | 173616 | 10014 | 3.57  | 99.7  |
| chr8 | 714787  | 716110  | 1324  | 0.01 | C_unshiu_00271 | 174956 | 173619 | 1338  | 0.48  | 98.14 |
| chr8 | 725993  | 737652  | 11660 | 0.05 | C_unshiu_00271 | 184564 | 196242 | 11679 | 4.17  | 99.7  |
| chr8 | 739616  | 743460  | 3845  | 0.02 | C_unshiu_00271 | 198858 | 202708 | 3851  | 1.37  | 99.56 |
| chr8 | 746140  | 748540  | 2401  | 0.01 | C_unshiu_00271 | 205066 | 207464 | 2399  | 0.86  | 99.79 |
| chr8 | 748534  | 788816  | 40283 | 0.17 | C_unshiu_00271 | 208570 | 248862 | 40293 | 14.38 | 99.72 |
| chr8 | 791164  | 815160  | 23997 | 0.1  | C_unshiu_00271 | 253035 | 277028 | 23994 | 8.56  | 99.71 |
| chr8 | 815552  | 821574  | 6023  | 0.03 | C_unshiu_00984 | 105622 | 99570  | 6053  | 5.59  | 98.91 |
| chr8 | 827047  | 828531  | 1485  | 0.01 | C_unshiu_00984 | 98612  | 97121  | 1492  | 1.38  | 99.33 |
| chr8 | 828856  | 843561  | 14706 | 0.06 | C_unshiu_00984 | 96747  | 81993  | 14755 | 13.63 | 99.34 |
| chr8 | 843563  | 851415  | 7853  | 0.03 | C_unshiu_00984 | 81804  | 73943  | 7862  | 7.26  | 99.31 |
| chr8 | 851396  | 874232  | 22837 | 0.1  | C_unshiu_00984 | 73925  | 51081  | 22845 | 21.1  | 99.72 |
| chr8 | 875972  | 919093  | 43122 | 0.18 | C_unshiu_00984 | 43426  | 250    | 43177 | 39.87 | 99.62 |
| chr8 | 919040  | 957361  | 38322 | 0.16 | C_unshiu_00021 | 782903 | 744537 | 38367 | 4.89  | 99.39 |
| chr8 | 957436  | 982736  | 25301 | 0.11 | C_unshiu_00021 | 744538 | 719199 | 25340 | 3.23  | 99.73 |
| chr8 | 982795  | 1004361 | 21567 | 0.09 | C_unshiu_00021 | 718799 | 697264 | 21536 | 2.75  | 99.54 |
| chr8 | 1007354 | 1079794 | 72441 | 0.31 | C_unshiu_00021 | 690938 | 618413 | 72526 | 9.24  | 99.36 |
| chr8 | 1080182 | 1083145 | 2964  | 0.01 | C_unshiu_00021 | 618173 | 615188 | 2986  | 0.38  | 98.79 |
| chr8 | 1083129 | 1134028 | 50900 | 0.22 | C_unshiu_00021 | 614992 | 564101 | 50892 | 6.49  | 99.6  |
| chr8 | 1137002 | 1138427 | 1426  | 0.01 | C_unshiu_00021 | 557702 | 556271 | 1432  | 0.18  | 99.37 |
| chr8 | 1138445 | 1146385 | 7941  | 0.03 | C_unshiu_00021 | 555480 | 547517 | 7964  | 1.02  | 98.53 |
| chr8 | 1154281 | 1168952 | 14672 | 0.06 | C_unshiu_00021 | 535946 | 521220 | 14727 | 1.88  | 99.44 |
| chr8 | 1169243 | 1217460 | 48218 | 0.2  | C_unshiu_00021 | 520937 | 472784 | 48154 | 6.14  | 99.51 |
| chr8 | 1221299 | 1228302 | 7004  | 0.03 | C_unshiu_00021 | 471726 | 464722 | 7005  | 0.89  | 99.79 |
| chr8 | 1229043 | 1283281 | 54239 | 0.23 | C_unshiu_00021 | 464729 | 410400 | 54330 | 6.93  | 99.36 |
| chr8 | 1288133 | 1292654 | 4522  | 0.02 | C_unshiu_00021 | 405537 | 401016 | 4522  | 0.58  | 99.85 |
| chr8 | 1292876 | 1348156 | 55281 | 0.23 | C_unshiu_00021 | 400724 | 345518 | 55207 | 7.04  | 99.11 |
| chr8 | 1352648 | 1353752 | 1105  | 0    | C_unshiu_01312 | 45373  | 44269  | 1105  | 1.45  | 100   |
| chr8 | 1354160 | 1364520 | 10361 | 0.04 | C_unshiu_00021 | 336652 | 326279 | 10374 | 1.32  | 99.03 |
| chr8 | 1394163 | 1396893 | 2731  | 0.01 | C_unshiu_00021 | 301297 | 298563 | 2735  | 0.35  | 99.41 |
| chr8 | 1403929 | 1424089 | 20161 | 0.09 | C_unshiu_00021 | 290534 | 270361 | 20174 | 2.57  | 99.65 |
| chr8 | 1425019 | 1441139 | 16121 | 0.07 | C_unshiu_00021 | 270655 | 254514 | 16142 | 2.06  | 99.62 |
| chr8 | 1441970 | 1448357 | 6388  | 0.03 | C_unshiu_00021 | 254881 | 248448 | 6434  | 0.82  | 98.03 |
| chr8 | 1451239 | 1462419 | 11181 | 0.05 | C_unshiu_00021 | 246806 | 235618 | 11189 | 1.43  | 99.55 |
| chr8 | 1463514 | 1500302 | 36789 | 0.16 | C_unshiu_00021 | 234099 | 197312 | 36788 | 4.69  | 99.57 |
| chr8 | 1516831 | 1527148 | 10318 | 0.04 | C_unshiu_00021 | 185082 | 174759 | 10324 | 1.32  | 99.43 |
| chr8 | 1527150 | 1539956 | 12807 | 0.05 | C_unshiu_00021 | 174348 | 161522 | 12827 | 1.64  | 99.68 |
| chr8 | 1557851 | 1559037 | 1187  | 0.01 | C_unshiu_00117 | 147457 | 148643 | 1187  | 0.27  | 98.15 |
| chr8 | 1558245 | 1569036 | 10792 | 0.05 | C_unshiu_00117 | 136774 | 147530 | 10757 | 2.49  | 98.34 |
| chr8 | 1570548 | 1575718 | 5171  | 0.02 | C_unshiu_00117 | 150138 | 155314 | 5177  | 1.2   | 99.59 |
| chr8 | 1577155 | 1585517 | 8363  | 0.04 | C_unshiu_00117 | 155324 | 163698 | 8375  | 1.94  | 99.64 |
| chr8 | 1586074 | 1632814 | 46741 | 0.2  | C_unshiu_00117 | 169703 | 216543 | 46841 | 10.84 | 99.53 |
| chr8 | 1632811 | 1647686 | 14876 | 0.06 | C_unshiu_00117 | 217234 | 232139 | 14906 | 3.45  | 99.35 |
| chr8 | 1647737 | 1671630 | 23894 | 0.1  | C_unshiu_00117 | 232396 | 256296 | 23901 | 5.53  | 99.76 |
| chr8 | 1674027 | 1708662 | 34636 | 0.15 | C_unshiu_00117 | 258643 | 293307 | 34665 | 8.02  | 98.69 |
| chr8 | 1711249 | 1719893 | 8645  | 0.04 | C_unshiu_00117 | 295296 | 303869 | 8574  | 1.98  | 98.48 |
| chr8 | 1719874 | 1722284 | 2411  | 0.01 | C_unshiu_00117 | 303896 | 306309 | 2414  | 0.56  | 99.59 |
| chr8 | 1723508 | 1756441 | 32934 | 0.14 | C_unshiu_00117 | 308172 | 340990 | 32819 | 7.59  | 99.2  |
| chr8 | 1757054 | 1807372 | 50319 | 0.21 | C_unshiu_00117 | 342050 | 392368 | 50319 | 11.64 | 99.77 |
| chr8 | 1809005 | 1813404 | 4400  | 0.02 | C_unshiu_01861 | 41133  | 36728  | 4406  | 9.54  | 99.66 |
| chr8 | 1813899 | 1829938 | 16040 | 0.07 | C_unshiu_01861 | 32552  | 16488  | 16065 | 34.78 | 99.66 |
| chr8 | 1832660 | 1834010 | 1351  | 0.01 | C_unshiu_01861 | 12178  | 10828  | 1351  | 2.93  | 99.93 |
| chr8 | 1833274 | 1843326 | 10053 | 0.04 | C_unshiu_00281 | 269247 | 259187 | 10061 | 3.64  | 98.72 |
| chr8 | 1845412 | 1862004 | 16593 | 0.07 | C_unshiu_00281 | 256617 | 240017 | 16601 | 6     | 99.73 |
| chr8 | 1862001 | 1872391 | 10391 | 0.04 | C_unshiu_00281 | 239320 | 228977 | 10344 | 3.74  | 99.16 |
| chr8 | 1873206 | 1878270 | 5065  | 0.02 | C_unshiu_00281 | 229365 | 224300 | 5066  | 1.83  | 98.37 |
| chr8 | 1915175 | 1920223 | 5049  | 0.02 | C_unshiu_00281 | 187707 | 182617 | 5091  | 1.84  | 98.29 |
| chr8 | 1920189 | 1930775 | 10587 | 0.04 | C_unshiu_00281 | 182617 | 172034 | 10584 | 3.83  | 98.66 |
| chr8 | 1932970 | 1945458 | 12489 | 0.05 | C_unshiu_00281 | 170931 | 158458 | 12474 | 4.51  | 98.32 |
| chr8 | 1947286 | 1967296 | 20011 | 0.08 | C_unshiu_00281 | 158460 | 138415 | 20046 | 7.25  | 98.53 |
| chr8 | 1967298 | 1970429 | 3132  | 0.01 | C_unshiu_00281 | 137990 | 134859 | 3132  | 1.13  | 98.91 |
| chr8 | 1970742 | 1976331 | 5590  | 0.02 | C_unshiu_00281 | 134629 | 129012 | 5618  | 2.03  | 98.35 |
| chr8 | 1980149 | 1991486 | 11338 | 0.05 | C_unshiu_00281 | 126277 | 114952 | 11326 | 4.09  | 98.04 |
| chr8 | 2059349 | 2060840 | 1492  | 0.01 | C_unshiu_00281 | 42455  | 40959  | 1497  | 0.54  | 98.93 |
| chr8 | 2060830 | 2064537 | 3708  | 0.02 | C_unshiu_00281 | 40838  | 37135  | 3704  | 1.34  | 98.25 |
| chr8 | 2065370 | 2071094 | 5725  | 0.02 | C_unshiu_00281 | 37142  | 31433  | 5710  | 2.06  | 98.29 |
| chr8 | 2073228 | 2082676 | 9449  | 0.04 | C_unshiu_00375 | 6765   | 16228  | 9464  | 4.09  | 98.08 |
| chr8 | 2111094 | 2119163 | 8070  | 0.03 | C_unshiu_00375 | 35462  | 43567  | 8106  | 3.5   | 98.78 |
| chr8 | 2119164 | 2125590 | 6427  | 0.03 | C_unshiu_00375 | 43801  | 50229  | 6429  | 2.78  | 98.34 |
| chr8 | 2147287 | 2153744 | 6458  | 0.03 | C_unshiu_02110 | 6507   | 1      | 6507  | 17.97 | 98.16 |
| chr8 | 2153887 | 2160290 | 6404  | 0.03 | C_unshiu_00571 | 9321   | 15732  | 6412  | 3.71  | 99.05 |
| chr8 | 2160312 | 2165708 | 5397  | 0.02 | C_unshiu_00375 | 87101  | 92498  | 5398  | 2.33  | 99.17 |
| chr8 | 2169516 | 2173987 | 4472  | 0.02 | C_unshiu_00571 | 24773  | 29259  | 4487  | 2.6   | 98.66 |
| chr8 | 2169517 | 2191557 | 22041 | 0.09 | C_unshiu_00375 | 97929  | 119994 | 22066 | 9.53  | 98.23 |
| chr8 | 2184934 | 2201135 | 16202 | 0.07 | C_unshiu_00571 | 47262  | 63486  | 16225 | 9.39  | 98.49 |

|      |         |         |       |      |                |        |        |       |       |       |
|------|---------|---------|-------|------|----------------|--------|--------|-------|-------|-------|
| chr8 | 2203269 | 2206630 | 3362  | 0.01 | C_unshiu_00571 | 66366  | 69726  | 3361  | 1.95  | 99.44 |
| chr8 | 2206174 | 2212461 | 6288  | 0.03 | C_unshiu_00375 | 131718 | 138014 | 6297  | 2.72  | 98.65 |
| chr8 | 2214837 | 2221453 | 6617  | 0.03 | C_unshiu_00571 | 77559  | 84193  | 6635  | 3.84  | 99.2  |
| chr8 | 2233441 | 2238243 | 4803  | 0.02 | C_unshiu_00571 | 97445  | 102234 | 4790  | 2.77  | 98.71 |
| chr8 | 2242047 | 2261383 | 19337 | 0.08 | C_unshiu_00571 | 104811 | 124216 | 19406 | 11.23 | 98.74 |
| chr8 | 2262929 | 2267206 | 4278  | 0.02 | C_unshiu_00571 | 124317 | 128609 | 4293  | 2.49  | 99.23 |
| chr8 | 2283469 | 2288282 | 4814  | 0.02 | C_unshiu_00571 | 148141 | 152957 | 4817  | 2.79  | 99.13 |
| chr8 | 2288990 | 2292805 | 3816  | 0.02 | C_unshiu_00571 | 152951 | 156771 | 3821  | 2.21  | 98.95 |
| chr8 | 2292885 | 2294037 | 1153  | 0    | C_unshiu_00571 | 156861 | 158013 | 1153  | 0.67  | 99.39 |
| chr8 | 2303070 | 2318000 | 14931 | 0.06 | C_unshiu_01320 | 21995  | 36888  | 14894 | 19.72 | 98.74 |
| chr8 | 2318536 | 2323377 | 4842  | 0.02 | C_unshiu_02393 | 7519   | 2665   | 4855  | 17.71 | 99.57 |
| chr8 | 2330349 | 2348516 | 18168 | 0.08 | C_unshiu_01320 | 44210  | 62399  | 18190 | 24.08 | 98.45 |
| chr8 | 2349559 | 2355584 | 6026  | 0.03 | C_unshiu_00525 | 170135 | 164103 | 6033  | 3.26  | 98.76 |
| chr8 | 2357691 | 2389266 | 31576 | 0.13 | C_unshiu_00525 | 161453 | 129725 | 31729 | 17.14 | 98.2  |
| chr8 | 2390263 | 2403391 | 13129 | 0.06 | C_unshiu_00525 | 129730 | 116587 | 13144 | 7.1   | 98.92 |
| chr8 | 2418005 | 2453980 | 35976 | 0.15 | C_unshiu_00525 | 102556 | 66563  | 35994 | 19.45 | 98.76 |
| chr8 | 2492204 | 2504829 | 12626 | 0.05 | C_unshiu_00525 | 29899  | 17277  | 12623 | 6.82  | 98.68 |
| chr8 | 2506472 | 2522450 | 15979 | 0.07 | C_unshiu_00525 | 16788  | 792    | 15997 | 8.64  | 98.54 |
| chr8 | 2548662 | 2551615 | 2954  | 0.01 | C_unshiu_02534 | 20826  | 23778  | 2953  | 12.42 | 99.26 |
| chr8 | 2572187 | 2574910 | 2724  | 0.01 | C_unshiu_00158 | 364293 | 361570 | 2724  | 0.73  | 98.17 |
| chr8 | 2586266 | 2589255 | 2990  | 0.01 | C_unshiu_00158 | 349495 | 346503 | 2993  | 0.8   | 99.53 |
| chr8 | 2589255 | 2594857 | 5603  | 0.02 | C_unshiu_00158 | 346381 | 340781 | 5601  | 1.5   | 98.47 |
| chr8 | 2595488 | 2605347 | 9860  | 0.04 | C_unshiu_00158 | 339245 | 329402 | 9844  | 2.63  | 98.54 |
| chr8 | 2633862 | 2634977 | 1116  | 0    | C_unshiu_00158 | 299379 | 298268 | 1112  | 0.3   | 98.48 |
| chr8 | 2634512 | 2645340 | 10829 | 0.05 | C_unshiu_02604 | 1      | 10859  | 10859 | 49.41 | 99.2  |
| chr8 | 2684651 | 2685698 | 1048  | 0    | C_unshiu_00598 | 58608  | 57561  | 1048  | 0.62  | 100   |
| chr8 | 2685706 | 2707448 | 21743 | 0.09 | C_unshiu_00158 | 244062 | 222170 | 21893 | 5.85  | 98.47 |
| chr8 | 2709198 | 2725697 | 16500 | 0.07 | C_unshiu_00158 | 220829 | 204261 | 16569 | 4.42  | 98.79 |
| chr8 | 2726557 | 2753334 | 26778 | 0.11 | C_unshiu_00158 | 203489 | 176603 | 26887 | 7.18  | 98.6  |
| chr8 | 2754727 | 2756215 | 1489  | 0.01 | C_unshiu_00158 | 175916 | 174428 | 1489  | 0.4   | 100   |
| chr8 | 2765552 | 2768367 | 2816  | 0.01 | C_unshiu_00158 | 167374 | 164546 | 2829  | 0.76  | 98.09 |
| chr8 | 2773616 | 2775999 | 2384  | 0.01 | C_unshiu_00158 | 159196 | 156794 | 2403  | 0.64  | 98.63 |
| chr8 | 2777896 | 2783310 | 5415  | 0.02 | C_unshiu_00158 | 155383 | 149969 | 5415  | 1.45  | 99.34 |
| chr8 | 2790007 | 2794168 | 4162  | 0.02 | C_unshiu_00158 | 136660 | 132487 | 4174  | 1.11  | 99.33 |
| chr8 | 2794279 | 2802336 | 8058  | 0.03 | C_unshiu_00158 | 132482 | 124390 | 8093  | 2.16  | 98.18 |
| chr8 | 2848607 | 2853116 | 4510  | 0.02 | C_unshiu_03095 | 1      | 4509   | 4509  | 46.91 | 99.62 |
| chr8 | 2854458 | 2855654 | 1197  | 0.01 | C_unshiu_03095 | 6276   | 7472   | 1197  | 12.45 | 100   |
| chr8 | 2870489 | 2896499 | 26011 | 0.11 | C_unshiu_00158 | 63251  | 37098  | 26154 | 6.98  | 98.53 |
| chr8 | 2902487 | 2907230 | 4744  | 0.02 | C_unshiu_00158 | 36197  | 31436  | 4762  | 1.27  | 98.87 |
| chr8 | 2913137 | 2925629 | 12493 | 0.05 | C_unshiu_00158 | 26282  | 13789  | 12494 | 3.34  | 98.83 |
| chr8 | 2925655 | 2929516 | 3862  | 0.02 | C_unshiu_00286 | 16649  | 12788  | 3862  | 1.41  | 99.97 |
| chr8 | 2928744 | 2930742 | 1999  | 0.01 | C_unshiu_00017 | 459148 | 457150 | 1999  | 0.23  | 100   |
| chr8 | 2956288 | 2968627 | 12340 | 0.05 | C_unshiu_01619 | 51311  | 38937  | 12375 | 21.86 | 98.73 |
| chr8 | 2979453 | 3007053 | 27601 | 0.12 | C_unshiu_01619 | 27561  | 1      | 27561 | 48.68 | 98.46 |
| chr8 | 3003590 | 3007460 | 3871  | 0.02 | C_unshiu_00082 | 462226 | 458342 | 3885  | 0.82  | 98.46 |
| chr8 | 3020380 | 3030987 | 10608 | 0.04 | C_unshiu_00082 | 444276 | 433669 | 10608 | 2.24  | 99.13 |
| chr8 | 3052475 | 3070844 | 18370 | 0.08 | C_unshiu_00082 | 404194 | 385708 | 18487 | 3.9   | 98.19 |
| chr8 | 3090596 | 3094637 | 4042  | 0.02 | C_unshiu_00082 | 368435 | 364372 | 4064  | 0.86  | 98.75 |
| chr8 | 3100223 | 3109592 | 9370  | 0.04 | C_unshiu_00082 | 357313 | 347866 | 9448  | 2     | 98.08 |
| chr8 | 3112326 | 3113454 | 1129  | 0    | C_unshiu_00082 | 347028 | 345897 | 1132  | 0.24  | 99.29 |
| chr8 | 3149085 | 3163364 | 14280 | 0.06 | C_unshiu_00082 | 305713 | 291302 | 14412 | 3.04  | 98.37 |
| chr8 | 3163983 | 3178206 | 14224 | 0.06 | C_unshiu_00082 | 291306 | 277078 | 14229 | 3.01  | 99.23 |
| chr8 | 3197375 | 3203150 | 5776  | 0.02 | C_unshiu_00639 | 87451  | 81673  | 5779  | 3.65  | 99.24 |
| chr8 | 3219622 | 3221215 | 1594  | 0.01 | C_unshiu_00639 | 73680  | 72084  | 1597  | 1.01  | 98.62 |
| chr8 | 3226449 | 3272102 | 45654 | 0.19 | C_unshiu_00639 | 67902  | 22191  | 45712 | 28.87 | 98.34 |
| chr8 | 3271627 | 3274265 | 2639  | 0.01 | C_unshiu_01354 | 1217   | 3857   | 2641  | 3.58  | 99.05 |
| chr8 | 3275224 | 3277391 | 2168  | 0.01 | C_unshiu_00639 | 19349  | 17175  | 2175  | 1.37  | 98.81 |
| chr8 | 3285156 | 3292791 | 7636  | 0.03 | C_unshiu_00639 | 7602   | 1      | 7602  | 4.8   | 98.35 |
| chr8 | 3311412 | 3323896 | 12485 | 0.05 | C_unshiu_01354 | 44150  | 56662  | 12513 | 16.94 | 99    |
| chr8 | 3324229 | 3327115 | 2887  | 0.01 | C_unshiu_00481 | 196177 | 193286 | 2892  | 1.46  | 98.1  |
| chr8 | 3324350 | 3327471 | 3122  | 0.01 | C_unshiu_01354 | 56833  | 59962  | 3130  | 4.24  | 98.03 |
| chr8 | 3327567 | 3338766 | 11200 | 0.05 | C_unshiu_01354 | 60106  | 71355  | 11250 | 15.23 | 98.12 |
| chr8 | 3331555 | 3338968 | 7414  | 0.03 | C_unshiu_00481 | 187421 | 180038 | 7384  | 3.74  | 98.87 |
| chr8 | 3338874 | 3340571 | 1698  | 0.01 | C_unshiu_00481 | 179973 | 178277 | 1697  | 0.86  | 99.88 |
| chr8 | 3364938 | 3368677 | 3740  | 0.02 | C_unshiu_00481 | 155034 | 151292 | 3743  | 1.9   | 99.04 |
| chr8 | 3370267 | 3371568 | 1302  | 0.01 | C_unshiu_00481 | 157117 | 155816 | 1302  | 0.66  | 99.31 |
| chr8 | 3374945 | 3391957 | 17013 | 0.07 | C_unshiu_00481 | 151880 | 134769 | 17112 | 8.66  | 98.66 |
| chr8 | 3391967 | 3406910 | 14944 | 0.06 | C_unshiu_00481 | 134501 | 119551 | 14951 | 7.57  | 98.28 |
| chr8 | 3422724 | 3455015 | 32292 | 0.14 | C_unshiu_00481 | 104130 | 71704  | 32427 | 16.42 | 98.57 |
| chr8 | 3473197 | 3474345 | 1149  | 0    | C_unshiu_02341 | 26008  | 24860  | 1149  | 4.02  | 99.83 |
| chr8 | 3474352 | 3477750 | 3399  | 0.01 | C_unshiu_01617 | 11344  | 7946   | 3399  | 5.99  | 100   |
| chr8 | 3483565 | 3485999 | 2435  | 0.01 | C_unshiu_01053 | 22939  | 25373  | 2435  | 2.44  | 99.79 |
| chr8 | 3486300 | 3502284 | 15985 | 0.07 | C_unshiu_01053 | 25792  | 41812  | 16021 | 16.06 | 98.39 |
| chr8 | 3526261 | 3536564 | 10304 | 0.04 | C_unshiu_01053 | 63498  | 73843  | 10346 | 10.37 | 98.04 |
| chr8 | 3536571 | 3548065 | 11495 | 0.05 | C_unshiu_01053 | 74001  | 85556  | 11556 | 11.59 | 98.48 |
| chr8 | 3548255 | 3562573 | 14319 | 0.06 | C_unshiu_02574 | 2949   | 17247  | 14299 | 63.04 | 99.18 |
| chr8 | 3558892 | 3566003 | 7112  | 0.03 | C_unshiu_02543 | 1      | 7118   | 7118  | 30.35 | 99.38 |
| chr8 | 3565999 | 3571836 | 5838  | 0.02 | C_unshiu_02543 | 12673  | 18511  | 5839  | 24.89 | 99.23 |
| chr8 | 3609986 | 3613238 | 3253  | 0.01 | C_unshiu_00500 | 152928 | 149675 | 3254  | 1.7   | 99.57 |

|      |         |         |       |      |                |        |        |       |       |       |
|------|---------|---------|-------|------|----------------|--------|--------|-------|-------|-------|
| chr8 | 3613237 | 3645202 | 31966 | 0.14 | C_unshiu_00500 | 149596 | 117565 | 32032 | 16.71 | 98.34 |
| chr8 | 3672307 | 3677372 | 5066  | 0.02 | C_unshiu_00576 | 94292  | 89225  | 5068  | 2.94  | 99.15 |
| chr8 | 3689755 | 3700639 | 10885 | 0.05 | C_unshiu_00500 | 73753  | 62824  | 10930 | 5.7   | 99.1  |
| chr8 | 3702881 | 3705715 | 2835  | 0.01 | C_unshiu_00500 | 61012  | 58178  | 2835  | 1.48  | 99.68 |
| chr8 | 3705715 | 3719452 | 13738 | 0.06 | C_unshiu_00500 | 57656  | 43885  | 13772 | 7.18  | 99.12 |
| chr8 | 3723305 | 3732535 | 9231  | 0.04 | C_unshiu_00500 | 41395  | 32191  | 9205  | 4.8   | 98.87 |
| chr8 | 3734624 | 3757266 | 22643 | 0.1  | C_unshiu_00500 | 31244  | 8628   | 22617 | 11.8  | 98.96 |
| chr8 | 3757294 | 3758382 | 1089  | 0    | C_unshiu_00438 | 153188 | 154282 | 1095  | 0.52  | 98.08 |
| chr8 | 3760622 | 3762710 | 2089  | 0.01 | C_unshiu_00500 | 8396   | 6298   | 2099  | 1.09  | 98.19 |
| chr8 | 3762707 | 3763725 | 1019  | 0    | C_unshiu_01816 | 40727  | 39709  | 1019  | 2.13  | 100   |
| chr8 | 3768762 | 3774251 | 5490  | 0.02 | C_unshiu_00444 | 167534 | 173039 | 5506  | 2.63  | 98.19 |
| chr8 | 3773944 | 3779889 | 5946  | 0.03 | C_unshiu_00444 | 174962 | 180875 | 5914  | 2.83  | 99.18 |
| chr8 | 3780228 | 3807749 | 27522 | 0.12 | C_unshiu_00444 | 181620 | 209172 | 27553 | 13.17 | 99.55 |
| chr8 | 3811348 | 3820432 | 9085  | 0.04 | C_unshiu_00383 | 174115 | 183206 | 9092  | 4     | 98.33 |
| chr8 | 3827195 | 3839511 | 12317 | 0.05 | C_unshiu_02413 | 20511  | 8201   | 12311 | 45.58 | 99.94 |
| chr8 | 3840772 | 3848695 | 7924  | 0.03 | C_unshiu_02413 | 7924   | 1      | 7924  | 29.34 | 99.9  |
| chr8 | 3856689 | 3863006 | 6318  | 0.03 | C_unshiu_00685 | 96242  | 89921  | 6322  | 4.28  | 99.15 |
| chr8 | 3860383 | 3863160 | 2778  | 0.01 | C_unshiu_02096 | 11451  | 14229  | 2779  | 7.58  | 99.21 |
| chr8 | 3863154 | 3864367 | 1214  | 0.01 | C_unshiu_00420 | 98978  | 100191 | 1214  | 0.55  | 100   |
| chr8 | 3864587 | 3877632 | 13046 | 0.06 | C_unshiu_00685 | 89447  | 76406  | 13042 | 8.84  | 99.72 |
| chr8 | 3878779 | 3893916 | 15138 | 0.06 | C_unshiu_00685 | 68223  | 53086  | 15138 | 10.26 | 99.92 |
| chr8 | 3915242 | 3917499 | 2258  | 0.01 | C_unshiu_00685 | 34226  | 31966  | 2261  | 1.53  | 99.03 |
| chr8 | 3942148 | 3943657 | 1510  | 0.01 | C_unshiu_00685 | 8433   | 6929   | 1505  | 1.02  | 98.74 |
| chr8 | 3945781 | 3948153 | 2373  | 0.01 | C_unshiu_00233 | 85378  | 87750  | 2373  | 0.78  | 100   |
| chr8 | 3948148 | 3953918 | 5771  | 0.02 | C_unshiu_02207 | 25596  | 31355  | 5760  | 17.45 | 98.86 |
| chr8 | 3953645 | 3962436 | 8792  | 0.04 | C_unshiu_02207 | 15951  | 7148   | 8804  | 26.67 | 98.38 |
| chr8 | 3962356 | 3966129 | 3774  | 0.02 | C_unshiu_02207 | 7077   | 3303   | 3775  | 11.43 | 99.97 |
| chr8 | 3968369 | 3975989 | 7621  | 0.03 | C_unshiu_00784 | 38630  | 46281  | 7652  | 5.86  | 98.79 |
| chr8 | 3986399 | 3989657 | 3259  | 0.01 | C_unshiu_01487 | 48546  | 45288  | 3259  | 5.09  | 100   |
| chr8 | 3990358 | 4005634 | 15277 | 0.06 | C_unshiu_00784 | 58920  | 74159  | 15240 | 11.68 | 99.06 |
| chr8 | 4006371 | 4016180 | 9810  | 0.04 | C_unshiu_01487 | 32896  | 23062  | 9835  | 15.37 | 98.99 |
| chr8 | 4029763 | 4041302 | 11540 | 0.05 | C_unshiu_02948 | 12861  | 1169   | 11693 | 80.06 | 98.03 |
| chr8 | 4050657 | 4054645 | 3989  | 0.02 | C_unshiu_00955 | 106668 | 110649 | 3982  | 3.59  | 99.07 |
| chr8 | 4055047 | 4067308 | 12262 | 0.05 | C_unshiu_00955 | 84598  | 72356  | 12243 | 11.03 | 98.06 |
| chr8 | 4090183 | 4091480 | 1298  | 0.01 | C_unshiu_01543 | 1599   | 302    | 1298  | 2.13  | 100   |
| chr8 | 4091481 | 4094286 | 2806  | 0.01 | C_unshiu_00320 | 137712 | 134888 | 2825  | 1.1   | 98.55 |
| chr8 | 4114065 | 4125000 | 10936 | 0.05 | C_unshiu_00955 | 28649  | 17695  | 10955 | 9.87  | 99.11 |
| chr8 | 4121869 | 4125000 | 3132  | 0.01 | C_unshiu_00808 | 4627   | 7761   | 3135  | 2.46  | 98.54 |
| chr8 | 4126051 | 4127726 | 1676  | 0.01 | C_unshiu_02378 | 1      | 1675   | 1675  | 6.04  | 99.58 |
| chr8 | 4128816 | 4130612 | 1797  | 0.01 | C_unshiu_02378 | 3397   | 5193   | 1797  | 6.48  | 100   |
| chr8 | 4130613 | 4135558 | 4946  | 0.02 | C_unshiu_00808 | 11177  | 16119  | 4943  | 3.88  | 98.43 |
| chr8 | 4137936 | 4155033 | 17098 | 0.07 | C_unshiu_02378 | 9133   | 26251  | 17119 | 61.77 | 98.6  |
| chr8 | 4146422 | 4156335 | 9914  | 0.04 | C_unshiu_00808 | 25880  | 35793  | 9914  | 7.78  | 98.19 |
| chr8 | 4161580 | 4165716 | 4137  | 0.02 | C_unshiu_00808 | 40921  | 45057  | 4137  | 3.24  | 99.11 |
| chr8 | 4188855 | 4191123 | 2269  | 0.01 | C_unshiu_00808 | 68049  | 70315  | 2267  | 1.78  | 99.25 |
| chr8 | 4193923 | 4202849 | 8927  | 0.04 | C_unshiu_00808 | 73232  | 82152  | 8921  | 7     | 98.88 |
| chr8 | 4215786 | 4220935 | 5150  | 0.02 | C_unshiu_00808 | 94196  | 99382  | 5187  | 4.07  | 98.42 |
| chr8 | 4229218 | 4249872 | 20655 | 0.09 | C_unshiu_00808 | 106806 | 127502 | 20697 | 16.23 | 98.98 |
| chr8 | 4281107 | 4290794 | 9688  | 0.04 | C_unshiu_00438 | 179556 | 169823 | 9734  | 4.58  | 98.52 |
| chr8 | 4291107 | 4305537 | 14431 | 0.06 | C_unshiu_00438 | 168981 | 154546 | 14436 | 6.8   | 99.47 |
| chr8 | 4308267 | 4311682 | 3416  | 0.01 | C_unshiu_00500 | 14     | 3426   | 3413  | 1.78  | 99.47 |
| chr8 | 4311723 | 4312816 | 1094  | 0    | C_unshiu_00438 | 152122 | 151029 | 1094  | 0.52  | 99.18 |
| chr8 | 4312813 | 4315444 | 2632  | 0.01 | C_unshiu_00438 | 150893 | 148258 | 2636  | 1.24  | 99.17 |
| chr8 | 4316103 | 4319768 | 3666  | 0.02 | C_unshiu_00438 | 147869 | 144228 | 3642  | 1.71  | 98.09 |
| chr8 | 4341269 | 4350832 | 9564  | 0.04 | C_unshiu_01573 | 9363   | 18944  | 9582  | 16.25 | 99.47 |
| chr8 | 4352526 | 4360413 | 7888  | 0.03 | C_unshiu_01976 | 29336  | 37204  | 7869  | 18.94 | 99.44 |
| chr8 | 4359143 | 4368298 | 9156  | 0.04 | C_unshiu_01311 | 19257  | 28401  | 9145  | 12.01 | 99.26 |
| chr8 | 4383331 | 4400263 | 16933 | 0.07 | C_unshiu_01311 | 42042  | 59081  | 17040 | 22.37 | 98.28 |
| chr8 | 4408421 | 4411060 | 2640  | 0.01 | C_unshiu_01311 | 63363  | 65997  | 2635  | 3.46  | 99.47 |
| chr8 | 4416427 | 4422200 | 5774  | 0.02 | C_unshiu_00784 | 7098   | 12892  | 5795  | 4.44  | 98.81 |
| chr8 | 4424705 | 4428690 | 3986  | 0.02 | C_unshiu_00784 | 15723  | 19719  | 3997  | 3.06  | 99.05 |
| chr8 | 4428703 | 4432311 | 3609  | 0.02 | C_unshiu_00784 | 19861  | 23499  | 3639  | 2.79  | 98.76 |
| chr8 | 4432311 | 4433845 | 1535  | 0.01 | C_unshiu_00784 | 28939  | 30472  | 1534  | 1.18  | 99.35 |
| chr8 | 4434096 | 4436568 | 2473  | 0.01 | C_unshiu_00634 | 67999  | 65527  | 2473  | 1.55  | 100   |
| chr8 | 4467694 | 4491587 | 23894 | 0.1  | C_unshiu_00974 | 4      | 23738  | 23735 | 21.78 | 98.73 |
| chr8 | 4494199 | 4495973 | 1775  | 0.01 | C_unshiu_01538 | 20162  | 18388  | 1775  | 2.9   | 99.49 |
| chr8 | 4506516 | 4511472 | 4957  | 0.02 | C_unshiu_01538 | 18063  | 13158  | 4906  | 8.02  | 98.29 |
| chr8 | 4511473 | 4512679 | 1207  | 0.01 | C_unshiu_00735 | 12874  | 11668  | 1207  | 0.87  | 100   |
| chr8 | 4512676 | 4524161 | 11486 | 0.05 | C_unshiu_01538 | 11506  | 1      | 11506 | 18.82 | 99.66 |
| chr8 | 4523365 | 4529653 | 6289  | 0.03 | C_unshiu_00974 | 23819  | 30119  | 6301  | 5.78  | 98.16 |
| chr8 | 4534995 | 4539077 | 4083  | 0.02 | C_unshiu_00974 | 36407  | 40495  | 4089  | 3.75  | 98.9  |
| chr8 | 4542230 | 4545737 | 3508  | 0.01 | C_unshiu_00974 | 32936  | 36479  | 3544  | 3.25  | 98.39 |
| chr8 | 4546725 | 4550352 | 3628  | 0.02 | C_unshiu_00974 | 44569  | 48170  | 3602  | 3.3   | 98.07 |
| chr8 | 4553148 | 4579909 | 26762 | 0.11 | C_unshiu_01305 | 66630  | 39905  | 26726 | 34.76 | 98.13 |
| chr8 | 4584347 | 4588662 | 4316  | 0.02 | C_unshiu_01890 | 12227  | 16542  | 4316  | 9.58  | 99.95 |
| chr8 | 4588663 | 4590882 | 2220  | 0.01 | C_unshiu_00883 | 28352  | 30571  | 2220  | 1.87  | 100   |
| chr8 | 4596685 | 4598832 | 2148  | 0.01 | C_unshiu_00689 | 115416 | 117563 | 2148  | 1.47  | 100   |
| chr8 | 4607864 | 4618497 | 10634 | 0.04 | C_unshiu_00883 | 43999  | 54632  | 10634 | 8.94  | 99.74 |
| chr8 | 4620450 | 4638232 | 17783 | 0.08 | C_unshiu_00513 | 129614 | 111859 | 17756 | 9.48  | 99.79 |

|      |         |         |       |      |                |        |        |       |       |       |
|------|---------|---------|-------|------|----------------|--------|--------|-------|-------|-------|
| chr8 | 4666583 | 4685715 | 19133 | 0.08 | C_unshiu_00345 | 23418  | 42523  | 19106 | 7.71  | 99.78 |
| chr8 | 4689290 | 4691034 | 1745  | 0.01 | C_unshiu_02576 | 14207  | 12462  | 1746  | 7.72  | 99.31 |
| chr8 | 4691346 | 4697985 | 6640  | 0.03 | C_unshiu_00345 | 46195  | 52829  | 6635  | 2.68  | 99.46 |
| chr8 | 4701011 | 4702065 | 1055  | 0    | C_unshiu_02576 | 7556   | 6501   | 1056  | 4.67  | 99.15 |
| chr8 | 4702080 | 4703943 | 1864  | 0.01 | C_unshiu_02576 | 9182   | 7320   | 1863  | 8.23  | 98.98 |
| chr8 | 4705380 | 4716991 | 11612 | 0.05 | C_unshiu_00345 | 57886  | 69507  | 11622 | 4.69  | 99.03 |
| chr8 | 4717502 | 4722271 | 4770  | 0.02 | C_unshiu_00345 | 70061  | 74830  | 4770  | 1.92  | 99.94 |
| chr8 | 4731876 | 4734099 | 2224  | 0.01 | C_unshiu_00959 | 51196  | 53424  | 2229  | 2.01  | 98.43 |
| chr8 | 4734069 | 4742196 | 8128  | 0.03 | C_unshiu_00345 | 85561  | 93708  | 8148  | 3.29  | 98.27 |
| chr8 | 4764507 | 4771167 | 6661  | 0.03 | C_unshiu_00958 | 100885 | 107546 | 6662  | 6.01  | 99.86 |
| chr8 | 4775365 | 4788607 | 13243 | 0.06 | C_unshiu_01761 | 36699  | 49923  | 13225 | 26.49 | 98.77 |
| chr8 | 4791827 | 4799626 | 7800  | 0.03 | C_unshiu_00249 | 196212 | 203990 | 7779  | 2.63  | 98.76 |
| chr8 | 4799622 | 4805798 | 6177  | 0.03 | C_unshiu_01925 | 22871  | 29047  | 6177  | 14.08 | 100   |
| chr8 | 4806454 | 4811093 | 4640  | 0.02 | C_unshiu_02976 | 8962   | 13601  | 4640  | 34.12 | 100   |
| chr8 | 4819547 | 4822533 | 2987  | 0.01 | C_unshiu_00249 | 224484 | 227494 | 3011  | 1.02  | 98.9  |
| chr8 | 4822903 | 4827149 | 4247  | 0.02 | C_unshiu_00249 | 228888 | 233146 | 4259  | 1.44  | 98.87 |
| chr8 | 4827654 | 4828968 | 1315  | 0.01 | C_unshiu_00249 | 234054 | 235367 | 1314  | 0.44  | 99.54 |
| chr8 | 4829152 | 4844785 | 15634 | 0.07 | C_unshiu_00249 | 235583 | 251187 | 15605 | 5.28  | 98.18 |
| chr8 | 4855821 | 4862536 | 6716  | 0.03 | C_unshiu_00249 | 255822 | 262563 | 6742  | 2.28  | 98.23 |
| chr8 | 4862557 | 4864595 | 2039  | 0.01 | C_unshiu_01495 | 62339  | 60302  | 2038  | 3.21  | 98.77 |
| chr8 | 4869064 | 4870669 | 1606  | 0.01 | C_unshiu_01495 | 56703  | 55091  | 1613  | 2.54  | 98.88 |
| chr8 | 4870716 | 4878103 | 7388  | 0.03 | C_unshiu_00249 | 288418 | 295806 | 7389  | 2.5   | 98.09 |
| chr8 | 4879657 | 4881135 | 1479  | 0.01 | C_unshiu_01495 | 50556  | 49078  | 1479  | 2.33  | 100   |
| chr8 | 4904249 | 4905581 | 1333  | 0.01 | C_unshiu_00722 | 133077 | 131745 | 1333  | 0.94  | 100   |
| chr8 | 4907147 | 4910901 | 3755  | 0.02 | C_unshiu_00722 | 129783 | 126042 | 3742  | 2.65  | 99.44 |
| chr8 | 4913176 | 4917833 | 4658  | 0.02 | C_unshiu_01495 | 16294  | 11636  | 4659  | 7.33  | 99.98 |
| chr8 | 4917826 | 4921415 | 3590  | 0.02 | C_unshiu_01028 | 83856  | 80267  | 3590  | 3.48  | 100   |
| chr8 | 4921445 | 4936262 | 14818 | 0.06 | C_unshiu_00722 | 114789 | 99962  | 14828 | 10.5  | 99.26 |
| chr8 | 4947263 | 4974357 | 27095 | 0.11 | C_unshiu_00722 | 88221  | 61128  | 27094 | 19.18 | 99.46 |
| chr8 | 4954311 | 4977531 | 23221 | 0.1  | C_unshiu_00722 | 81172  | 57954  | 23219 | 16.44 | 99.37 |
| chr8 | 4986426 | 4989054 | 2629  | 0.01 | C_unshiu_00320 | 28572  | 31190  | 2619  | 1.02  | 98.37 |
| chr8 | 4993765 | 4997594 | 3830  | 0.02 | C_unshiu_00320 | 35071  | 38911  | 3841  | 1.5   | 98.62 |
| chr8 | 5000709 | 5003424 | 2716  | 0.01 | C_unshiu_00320 | 46933  | 49654  | 2722  | 1.06  | 98.39 |
| chr8 | 5022490 | 5025882 | 3393  | 0.01 | C_unshiu_00320 | 67100  | 70491  | 3392  | 1.32  | 99.79 |
| chr8 | 5055959 | 5060419 | 4461  | 0.02 | C_unshiu_00320 | 100003 | 104465 | 4463  | 1.74  | 98.99 |
| chr8 | 5077732 | 5079387 | 1656  | 0.01 | C_unshiu_00320 | 120925 | 122580 | 1656  | 0.65  | 99.64 |
| chr8 | 5079658 | 5083435 | 3778  | 0.02 | C_unshiu_00320 | 122247 | 126011 | 3765  | 1.47  | 98.44 |
| chr8 | 5098965 | 5111722 | 12758 | 0.05 | C_unshiu_00320 | 140535 | 153301 | 12767 | 4.98  | 98.66 |
| chr8 | 5122003 | 5132087 | 10085 | 0.04 | C_unshiu_00320 | 159251 | 169346 | 10096 | 3.94  | 99.54 |
| chr8 | 5125382 | 5147993 | 22612 | 0.1  | C_unshiu_01839 | 46949  | 24235  | 22715 | 48.38 | 98.42 |
| chr8 | 5150135 | 5153544 | 3410  | 0.01 | C_unshiu_00320 | 176171 | 179580 | 3410  | 1.33  | 99.94 |
| chr8 | 5165118 | 5180879 | 15762 | 0.07 | C_unshiu_00320 | 185000 | 200739 | 15740 | 6.14  | 98.02 |
| chr8 | 5212840 | 5215607 | 2768  | 0.01 | C_unshiu_00320 | 233222 | 235990 | 2769  | 1.08  | 99.67 |
| chr8 | 5219931 | 5225866 | 5936  | 0.03 | C_unshiu_00320 | 237620 | 243565 | 5946  | 2.32  | 98.64 |
| chr8 | 5233056 | 5234901 | 1846  | 0.01 | C_unshiu_00059 | 563997 | 562149 | 1849  | 0.31  | 99.03 |
| chr8 | 5236505 | 5238234 | 1730  | 0.01 | C_unshiu_00059 | 559712 | 557984 | 1729  | 0.29  | 99.19 |
| chr8 | 5238752 | 5247004 | 8253  | 0.03 | C_unshiu_00059 | 557029 | 548816 | 8214  | 1.4   | 98.63 |
| chr8 | 5248849 | 5254966 | 6118  | 0.03 | C_unshiu_00059 | 546502 | 540378 | 6125  | 1.04  | 99.31 |
| chr8 | 5256646 | 5258174 | 1529  | 0.01 | C_unshiu_00059 | 538211 | 536685 | 1527  | 0.26  | 99.87 |
| chr8 | 5267175 | 5278237 | 11063 | 0.05 | C_unshiu_00059 | 534421 | 523361 | 11061 | 1.88  | 99.3  |
| chr8 | 5279063 | 5301220 | 22158 | 0.09 | C_unshiu_00059 | 523192 | 501035 | 22158 | 3.77  | 98.72 |
| chr8 | 5307460 | 5309248 | 1789  | 0.01 | C_unshiu_00059 | 494228 | 492440 | 1789  | 0.3   | 99.72 |
| chr8 | 5314010 | 5337028 | 23019 | 0.1  | C_unshiu_00059 | 487151 | 464080 | 23072 | 3.92  | 99.23 |
| chr8 | 5337232 | 5342941 | 5710  | 0.02 | C_unshiu_00059 | 463888 | 458172 | 5717  | 0.97  | 98.85 |
| chr8 | 5354913 | 5358026 | 3114  | 0.01 | C_unshiu_00320 | 4108   | 7228   | 3121  | 1.22  | 99.49 |
| chr8 | 5361070 | 5363151 | 2082  | 0.01 | C_unshiu_00011 | 96201  | 94121  | 2081  | 0.22  | 99.23 |
| chr8 | 5363142 | 5370537 | 7396  | 0.03 | C_unshiu_00011 | 93043  | 85637  | 7407  | 0.77  | 99.04 |
| chr8 | 5383128 | 5411315 | 28188 | 0.12 | C_unshiu_00011 | 71477  | 43262  | 28216 | 2.92  | 98.36 |
| chr8 | 5422725 | 5425161 | 2437  | 0.01 | C_unshiu_01697 | 989    | 3427   | 2439  | 4.64  | 99.55 |
| chr8 | 5426714 | 5428940 | 2227  | 0.01 | C_unshiu_01697 | 5130   | 7356   | 2227  | 4.23  | 98.43 |
| chr8 | 5428936 | 5446352 | 17417 | 0.07 | C_unshiu_01697 | 8643   | 26135  | 17493 | 33.26 | 98.72 |
| chr8 | 5446976 | 5448913 | 1938  | 0.01 | C_unshiu_01697 | 26862  | 28798  | 1937  | 3.68  | 99.74 |
| chr8 | 5448185 | 5453400 | 5216  | 0.02 | C_unshiu_00011 | 110295 | 115524 | 5230  | 0.54  | 98.51 |
| chr8 | 5506355 | 5508832 | 2478  | 0.01 | C_unshiu_00011 | 168292 | 170727 | 2436  | 0.25  | 98.18 |
| chr8 | 5513562 | 5516331 | 2770  | 0.01 | C_unshiu_00011 | 177087 | 179874 | 2788  | 0.29  | 98.32 |
| chr8 | 5523564 | 5525169 | 1606  | 0.01 | C_unshiu_00011 | 181572 | 183183 | 1612  | 0.17  | 98.57 |
| chr8 | 5525204 | 5534494 | 9291  | 0.04 | C_unshiu_00011 | 183510 | 192825 | 9316  | 0.96  | 98.43 |
| chr8 | 5541201 | 5542515 | 1315  | 0.01 | C_unshiu_00011 | 200601 | 201923 | 1323  | 0.14  | 98.56 |
| chr8 | 5542967 | 5552744 | 9778  | 0.04 | C_unshiu_00011 | 202804 | 212611 | 9808  | 1.01  | 98.28 |
| chr8 | 5553527 | 5559036 | 5510  | 0.02 | C_unshiu_00011 | 210623 | 216126 | 5504  | 0.57  | 99.17 |
| chr8 | 5559788 | 5561911 | 2124  | 0.01 | C_unshiu_00709 | 118341 | 116218 | 2124  | 1.49  | 99.44 |
| chr8 | 5564084 | 5566125 | 2042  | 0.01 | C_unshiu_00011 | 222312 | 224353 | 2042  | 0.21  | 99.85 |
| chr8 | 5569480 | 5572027 | 2548  | 0.01 | C_unshiu_00011 | 226751 | 229296 | 2546  | 0.26  | 98.86 |
| chr8 | 5579369 | 5593532 | 14164 | 0.06 | C_unshiu_00011 | 234313 | 248522 | 14210 | 1.47  | 99.04 |
| chr8 | 5599575 | 5604089 | 4515  | 0.02 | C_unshiu_00011 | 255069 | 259592 | 4524  | 0.47  | 98.43 |
| chr8 | 5604091 | 5635469 | 31379 | 0.13 | C_unshiu_00011 | 259756 | 291207 | 31452 | 3.25  | 99.49 |
| chr8 | 5638187 | 5640743 | 2557  | 0.01 | C_unshiu_00011 | 292226 | 294782 | 2557  | 0.26  | 99.96 |
| chr8 | 5642633 | 5644660 | 2028  | 0.01 | C_unshiu_00011 | 297058 | 299097 | 2040  | 0.21  | 98.19 |
| chr8 | 5650888 | 5670569 | 19682 | 0.08 | C_unshiu_00212 | 19660  | 1      | 19660 | 6     | 99.73 |

|      |         |         |       |      |                |        |        |       |       |       |
|------|---------|---------|-------|------|----------------|--------|--------|-------|-------|-------|
| chr8 | 5677540 | 5701004 | 23465 | 0.1  | C_unshiu_01606 | 11612  | 35100  | 23489 | 41.07 | 98.68 |
| chr8 | 5701006 | 5704583 | 3578  | 0.02 | C_unshiu_01606 | 35366  | 38944  | 3579  | 6.26  | 99.75 |
| chr8 | 5724843 | 5728445 | 3603  | 0.02 | C_unshiu_02473 | 17866  | 14241  | 3626  | 14.24 | 98.98 |
| chr8 | 5737922 | 5739743 | 1822  | 0.01 | C_unshiu_00251 | 35807  | 37629  | 1823  | 0.62  | 99.07 |
| chr8 | 5741242 | 5743320 | 2079  | 0.01 | C_unshiu_00251 | 39686  | 41764  | 2079  | 0.7   | 99.13 |
| chr8 | 5741475 | 5753802 | 12328 | 0.05 | C_unshiu_02467 | 12560  | 24867  | 12308 | 48.07 | 99.47 |
| chr8 | 5753814 | 5755274 | 1461  | 0.01 | C_unshiu_00251 | 48904  | 50364  | 1461  | 0.49  | 100   |
| chr8 | 5781489 | 5784190 | 2702  | 0.01 | C_unshiu_00251 | 69161  | 71870  | 2710  | 0.92  | 99    |
| chr8 | 5784657 | 5789471 | 4815  | 0.02 | C_unshiu_00251 | 72855  | 77674  | 4820  | 1.63  | 99.46 |
| chr8 | 5805676 | 5808360 | 2685  | 0.01 | C_unshiu_00251 | 86986  | 89674  | 2689  | 0.91  | 98.11 |
| chr8 | 5809721 | 5816762 | 7042  | 0.03 | C_unshiu_00251 | 89722  | 96705  | 6984  | 2.37  | 98.65 |
| chr8 | 5818856 | 5824183 | 5328  | 0.02 | C_unshiu_00251 | 96802  | 102138 | 5337  | 1.81  | 99.16 |
| chr8 | 5833245 | 5836139 | 2895  | 0.01 | C_unshiu_00251 | 103562 | 106442 | 2881  | 0.98  | 99.31 |
| chr8 | 5862338 | 5879533 | 17196 | 0.07 | C_unshiu_00251 | 135114 | 152357 | 17244 | 5.84  | 98.94 |
| chr8 | 5880950 | 5885441 | 4492  | 0.02 | C_unshiu_00251 | 152353 | 156827 | 4475  | 1.52  | 98.18 |
| chr8 | 5891547 | 5923045 | 31499 | 0.13 | C_unshiu_00251 | 162663 | 194296 | 31634 | 10.71 | 98.69 |
| chr8 | 5923062 | 5924481 | 1420  | 0.01 | C_unshiu_00251 | 196951 | 198368 | 1418  | 0.48  | 99.51 |
| chr8 | 5924777 | 5934115 | 9339  | 0.04 | C_unshiu_00251 | 198960 | 208241 | 9282  | 3.14  | 98.64 |
| chr8 | 5935488 | 5948219 | 12732 | 0.05 | C_unshiu_00251 | 210207 | 222999 | 12793 | 4.33  | 98.63 |
| chr8 | 5949160 | 5964942 | 15783 | 0.07 | C_unshiu_02346 | 26746  | 10936  | 15811 | 55.66 | 98.62 |
| chr8 | 5958652 | 5985069 | 26418 | 0.11 | C_unshiu_00251 | 233901 | 260326 | 26426 | 8.95  | 99.49 |
| chr8 | 5984620 | 5986442 | 1823  | 0.01 | C_unshiu_00251 | 260655 | 262477 | 1823  | 0.62  | 98.85 |
| chr8 | 5986531 | 6003169 | 16639 | 0.07 | C_unshiu_00251 | 262604 | 279242 | 16639 | 5.64  | 99.34 |
| chr8 | 6021829 | 6024707 | 2879  | 0.01 | C_unshiu_01086 | 51582  | 54460  | 2879  | 2.95  | 98.47 |
| chr8 | 6024995 | 6035423 | 10429 | 0.04 | C_unshiu_01110 | 12457  | 2027   | 10431 | 10.99 | 99.58 |
| chr8 | 6038423 | 6047384 | 8962  | 0.04 | C_unshiu_01653 | 51334  | 42373  | 8962  | 16.27 | 100   |
| chr8 | 6049280 | 6051210 | 1931  | 0.01 | C_unshiu_00507 | 25472  | 23542  | 1931  | 1.02  | 100   |
| chr8 | 6051204 | 6062035 | 10832 | 0.05 | C_unshiu_01653 | 39589  | 28754  | 10836 | 19.68 | 99.84 |
| chr8 | 6065838 | 6075210 | 9373  | 0.04 | C_unshiu_01653 | 17847  | 8452   | 9396  | 17.06 | 99.19 |
| chr8 | 6076550 | 6083095 | 6546  | 0.03 | C_unshiu_01653 | 6571   | 1      | 6571  | 11.93 | 98.81 |
| chr8 | 6085764 | 6087900 | 2137  | 0.01 | C_unshiu_00962 | 463    | 2592   | 2130  | 1.93  | 98.46 |
| chr8 | 6085764 | 6087894 | 2131  | 0.01 | C_unshiu_02252 | 21087  | 23213  | 2127  | 6.74  | 98.92 |
| chr8 | 6091089 | 6094327 | 3239  | 0.01 | C_unshiu_02252 | 28294  | 31541  | 3248  | 10.29 | 98.56 |
| chr8 | 6107759 | 6110242 | 2484  | 0.01 | C_unshiu_00962 | 22096  | 24589  | 2494  | 2.26  | 98.76 |
| chr8 | 6112182 | 6121733 | 9552  | 0.04 | C_unshiu_00962 | 25233  | 34806  | 9574  | 8.67  | 98.19 |
| chr8 | 6123672 | 6125650 | 1979  | 0.01 | C_unshiu_01116 | 10443  | 8465   | 1979  | 2.1   | 100   |
| chr8 | 6126387 | 6130294 | 3908  | 0.02 | C_unshiu_00962 | 39114  | 43032  | 3919  | 3.55  | 99.16 |
| chr8 | 6135656 | 6139644 | 3989  | 0.02 | C_unshiu_01594 | 16395  | 20396  | 4002  | 6.93  | 99.05 |
| chr8 | 6139662 | 6142145 | 2484  | 0.01 | C_unshiu_00962 | 50361  | 52844  | 2484  | 2.25  | 99.76 |
| chr8 | 6144745 | 6146106 | 1362  | 0.01 | C_unshiu_01860 | 1760   | 3123   | 1364  | 2.95  | 98.32 |
| chr8 | 6147562 | 6159289 | 11728 | 0.05 | C_unshiu_00962 | 58223  | 69909  | 11687 | 10.58 | 99.07 |
| chr8 | 6161203 | 6162400 | 1198  | 0.01 | C_unshiu_00105 | 13395  | 14588  | 1194  | 0.26  | 98.66 |
| chr8 | 6170700 | 6204162 | 33463 | 0.14 | C_unshiu_00962 | 76814  | 110314 | 33501 | 30.32 | 99.75 |
| chr8 | 6206020 | 6208775 | 2756  | 0.01 | C_unshiu_01147 | 91062  | 88307  | 2756  | 3.02  | 99.82 |
| chr8 | 6208920 | 6215269 | 6350  | 0.03 | C_unshiu_01147 | 88157  | 81808  | 6350  | 6.97  | 99.97 |
| chr8 | 6215282 | 6234774 | 19493 | 0.08 | C_unshiu_01147 | 81513  | 62022  | 19492 | 21.39 | 99.92 |
| chr8 | 6235945 | 6237215 | 1271  | 0.01 | C_unshiu_00962 | 49134  | 50404  | 1271  | 1.15  | 99.69 |
| chr8 | 6237767 | 6240178 | 2412  | 0.01 | C_unshiu_01594 | 22487  | 24898  | 2412  | 4.18  | 100   |
| chr8 | 6240464 | 6261136 | 20673 | 0.09 | C_unshiu_01594 | 55682  | 35042  | 20641 | 35.75 | 99.57 |
| chr8 | 6262408 | 6270304 | 7897  | 0.03 | C_unshiu_01147 | 56958  | 49054  | 7905  | 8.67  | 99.67 |
| chr8 | 6278340 | 6286195 | 7856  | 0.03 | C_unshiu_01860 | 4584   | 12396  | 7813  | 16.91 | 98.75 |
| chr8 | 6289649 | 6293892 | 4244  | 0.02 | C_unshiu_01860 | 13852  | 18096  | 4245  | 9.19  | 99.91 |
| chr8 | 6294793 | 6304748 | 9956  | 0.04 | C_unshiu_01317 | 2070   | 12009  | 9940  | 13.13 | 99.42 |
| chr8 | 6315776 | 6317103 | 1328  | 0.01 | C_unshiu_01860 | 38105  | 39432  | 1328  | 2.87  | 98.8  |
| chr8 | 6317349 | 6347830 | 30482 | 0.13 | C_unshiu_01317 | 27381  | 57790  | 30410 | 40.17 | 99.25 |
| chr8 | 6347885 | 6350688 | 2804  | 0.01 | C_unshiu_01317 | 58699  | 61514  | 2816  | 3.72  | 98.79 |
| chr8 | 6356697 | 6364697 | 8001  | 0.03 | C_unshiu_01317 | 64895  | 72862  | 7968  | 10.52 | 98.2  |
| chr8 | 6368743 | 6370054 | 1312  | 0.01 | C_unshiu_00333 | 162966 | 164277 | 1312  | 0.52  | 100   |
| chr8 | 6370443 | 6373241 | 2799  | 0.01 | C_unshiu_00333 | 165003 | 167795 | 2793  | 1.11  | 99.25 |
| chr8 | 6388978 | 6396640 | 7663  | 0.03 | C_unshiu_00333 | 178560 | 186212 | 7653  | 3.05  | 98.95 |
| chr8 | 6396632 | 6398706 | 2075  | 0.01 | C_unshiu_00333 | 186629 | 188713 | 2085  | 0.83  | 98.37 |
| chr8 | 6399256 | 6400425 | 1170  | 0    | C_unshiu_00333 | 192685 | 193842 | 1158  | 0.46  | 98.03 |
| chr8 | 6405213 | 6427010 | 21798 | 0.09 | C_unshiu_00427 | 165    | 21937  | 21773 | 10.04 | 99.85 |
| chr8 | 6428395 | 6432432 | 4038  | 0.02 | C_unshiu_00333 | 194860 | 198872 | 4013  | 1.6   | 99.33 |
| chr8 | 6433833 | 6435870 | 2038  | 0.01 | C_unshiu_00427 | 27188  | 29228  | 2041  | 0.94  | 99.71 |
| chr8 | 6437177 | 6438826 | 1650  | 0.01 | C_unshiu_00427 | 31121  | 32766  | 1646  | 0.76  | 98.61 |
| chr8 | 6439481 | 6441944 | 2464  | 0.01 | C_unshiu_00427 | 34837  | 37301  | 2465  | 1.14  | 99.84 |
| chr8 | 6442043 | 6446984 | 4942  | 0.02 | C_unshiu_00427 | 37423  | 42366  | 4944  | 2.28  | 99.7  |
| chr8 | 6446984 | 6448982 | 1999  | 0.01 | C_unshiu_00427 | 43070  | 45068  | 1999  | 0.92  | 99.8  |
| chr8 | 6453497 | 6456515 | 3019  | 0.01 | C_unshiu_03076 | 5147   | 8136   | 2990  | 29.21 | 98.41 |
| chr8 | 6456226 | 6459731 | 3506  | 0.01 | C_unshiu_00427 | 54736  | 58241  | 3506  | 1.62  | 99.89 |
| chr8 | 6461662 | 6464483 | 2822  | 0.01 | C_unshiu_00427 | 59135  | 61957  | 2823  | 1.3   | 99.96 |
| chr8 | 6465230 | 6466968 | 1739  | 0.01 | C_unshiu_00427 | 63184  | 64918  | 1735  | 0.8   | 99.37 |
| chr8 | 6467462 | 6469937 | 2476  | 0.01 | C_unshiu_00427 | 67823  | 70314  | 2492  | 1.15  | 98.24 |
| chr8 | 6470069 | 6472375 | 2307  | 0.01 | C_unshiu_00427 | 70484  | 72812  | 2329  | 1.07  | 98.07 |
| chr8 | 6483253 | 6502356 | 19104 | 0.08 | C_unshiu_01593 | 34688  | 53798  | 19111 | 33.07 | 98.25 |
| chr8 | 6505508 | 6508279 | 2772  | 0.01 | C_unshiu_00755 | 31047  | 33818  | 2772  | 2.05  | 100   |
| chr8 | 6541231 | 6553317 | 12087 | 0.05 | C_unshiu_00427 | 133333 | 145464 | 12132 | 5.6   | 99.01 |
| chr8 | 6558259 | 6559762 | 1504  | 0.01 | C_unshiu_00427 | 145460 | 146962 | 1503  | 0.69  | 98.08 |

|      |         |         |       |      |                |        |        |       |       |       |
|------|---------|---------|-------|------|----------------|--------|--------|-------|-------|-------|
| chr8 | 6570541 | 6572820 | 2280  | 0.01 | C_unshiu_01787 | 23445  | 25724  | 2280  | 4.65  | 100   |
| chr8 | 6580598 | 6585590 | 4993  | 0.02 | C_unshiu_02066 | 24201  | 19210  | 4992  | 13.1  | 99.94 |
| chr8 | 6586466 | 6587778 | 1313  | 0.01 | C_unshiu_02066 | 17043  | 15731  | 1313  | 3.45  | 99.47 |
| chr8 | 6622523 | 6627151 | 4629  | 0.02 | C_unshiu_01281 | 63207  | 58573  | 4635  | 5.9   | 98.35 |
| chr8 | 6627160 | 6634216 | 7057  | 0.03 | C_unshiu_01281 | 58191  | 51065  | 7127  | 9.07  | 98.29 |
| chr8 | 6654077 | 6655218 | 1142  | 0    | C_unshiu_01281 | 35869  | 34728  | 1142  | 1.45  | 100   |
| chr8 | 6662018 | 6664151 | 2134  | 0.01 | C_unshiu_01281 | 29575  | 27442  | 2134  | 2.72  | 99.91 |
| chr8 | 6681976 | 6719462 | 37487 | 0.16 | C_unshiu_00392 | 95675  | 58194  | 37482 | 16.68 | 99.87 |
| chr8 | 6718123 | 6725134 | 7012  | 0.03 | C_unshiu_00392 | 52661  | 45640  | 7022  | 3.12  | 99.74 |
| chr8 | 6725154 | 6735696 | 10543 | 0.04 | C_unshiu_00392 | 44682  | 34162  | 10521 | 4.68  | 99.52 |
| chr8 | 6736411 | 6743482 | 7072  | 0.03 | C_unshiu_01281 | 7039   | 1      | 7039  | 8.96  | 98.29 |
| chr8 | 6740812 | 6744247 | 3436  | 0.01 | C_unshiu_00669 | 152623 | 149192 | 3432  | 2.25  | 98.23 |
| chr8 | 6744207 | 6756554 | 12348 | 0.05 | C_unshiu_00669 | 148719 | 136335 | 12385 | 8.11  | 99.14 |
| chr8 | 6754686 | 6775534 | 20849 | 0.09 | C_unshiu_00392 | 23903  | 3076   | 20828 | 9.27  | 99.51 |
| chr8 | 6776036 | 6779240 | 3205  | 0.01 | C_unshiu_00025 | 694897 | 691693 | 3205  | 0.42  | 100   |
| chr8 | 6780782 | 6783531 | 2750  | 0.01 | C_unshiu_00669 | 123652 | 120892 | 2761  | 1.81  | 98.95 |
| chr8 | 6783762 | 6788174 | 4413  | 0.02 | C_unshiu_00669 | 120879 | 116443 | 4437  | 2.91  | 98.99 |
| chr8 | 6788155 | 6793143 | 4989  | 0.02 | C_unshiu_00669 | 116424 | 111401 | 5024  | 3.29  | 98.75 |
| chr8 | 6794604 | 6796665 | 2062  | 0.01 | C_unshiu_00669 | 109285 | 107218 | 2068  | 1.35  | 98.5  |
| chr8 | 6798392 | 6803697 | 5306  | 0.02 | C_unshiu_00669 | 105982 | 100691 | 5292  | 3.47  | 98.55 |
| chr8 | 6808735 | 6820422 | 11688 | 0.05 | C_unshiu_00669 | 94488  | 82796  | 11693 | 7.66  | 99.15 |
| chr8 | 6838781 | 6844040 | 5260  | 0.02 | C_unshiu_00669 | 71155  | 65871  | 5285  | 3.46  | 99.02 |
| chr8 | 6844691 | 6849809 | 5119  | 0.02 | C_unshiu_00669 | 65650  | 60518  | 5133  | 3.36  | 98.31 |
| chr8 | 6849705 | 6864543 | 14839 | 0.06 | C_unshiu_00669 | 60727  | 45910  | 14818 | 9.71  | 98.6  |
| chr8 | 6854735 | 6865099 | 10365 | 0.04 | C_unshiu_00080 | 252193 | 241817 | 10377 | 2.11  | 99.32 |
| chr8 | 6866047 | 6867974 | 1928  | 0.01 | C_unshiu_00669 | 43745  | 41817  | 1929  | 1.26  | 99.79 |
| chr8 | 6869195 | 6870681 | 1487  | 0.01 | C_unshiu_00080 | 237967 | 236480 | 1488  | 0.3   | 99.8  |
| chr8 | 6875136 | 6877924 | 2789  | 0.01 | C_unshiu_00080 | 230400 | 227612 | 2789  | 0.57  | 99.93 |
| chr8 | 6877924 | 6885305 | 7382  | 0.03 | C_unshiu_00080 | 227507 | 220108 | 7400  | 1.5   | 99.53 |
| chr8 | 6896557 | 6901861 | 5305  | 0.02 | C_unshiu_00080 | 207267 | 201939 | 5329  | 1.08  | 98.95 |
| chr8 | 6902341 | 6916630 | 14290 | 0.06 | C_unshiu_00080 | 201021 | 186712 | 14310 | 2.9   | 99.13 |
| chr8 | 6921747 | 6922970 | 1224  | 0.01 | C_unshiu_00080 | 181691 | 180465 | 1227  | 0.25  | 99.67 |
| chr8 | 6926821 | 6928836 | 2016  | 0.01 | C_unshiu_00080 | 175619 | 173599 | 2021  | 0.41  | 99.11 |
| chr8 | 6928872 | 6949780 | 20909 | 0.09 | C_unshiu_00464 | 175092 | 154165 | 20928 | 10.28 | 99.74 |
| chr8 | 6950411 | 6955899 | 5489  | 0.02 | C_unshiu_00464 | 154169 | 148667 | 5503  | 2.7   | 99.36 |
| chr8 | 6955919 | 6959820 | 3902  | 0.02 | C_unshiu_00464 | 148422 | 144511 | 3912  | 1.92  | 98.98 |
| chr8 | 6966797 | 6968404 | 1608  | 0.01 | C_unshiu_00434 | 204807 | 203200 | 1608  | 0.75  | 99.88 |
| chr8 | 6981344 | 6984787 | 3444  | 0.01 | C_unshiu_00434 | 192106 | 188666 | 3441  | 1.61  | 98.64 |
| chr8 | 6987696 | 6994895 | 7200  | 0.03 | C_unshiu_01672 | 6459   | 13663  | 7205  | 13.35 | 99.88 |
| chr8 | 7000502 | 7013983 | 13482 | 0.06 | C_unshiu_01672 | 15880  | 29361  | 13482 | 24.97 | 99.98 |
| chr8 | 7018562 | 7019598 | 1037  | 0    | C_unshiu_01672 | 35698  | 36734  | 1037  | 1.92  | 99.33 |
| chr8 | 7020436 | 7026337 | 5902  | 0.02 | C_unshiu_02709 | 5903   | 1      | 5903  | 29.95 | 99.83 |
| chr8 | 7028046 | 7029342 | 1297  | 0.01 | C_unshiu_02709 | 7360   | 6064   | 1297  | 6.58  | 100   |
| chr8 | 7048324 | 7055367 | 7044  | 0.03 | C_unshiu_00231 | 173611 | 180693 | 7083  | 2.31  | 98.81 |
| chr8 | 7057818 | 7066002 | 8185  | 0.03 | C_unshiu_00231 | 185274 | 193440 | 8167  | 2.66  | 98.79 |
| chr8 | 7071992 | 7075862 | 3871  | 0.02 | C_unshiu_00231 | 199127 | 202995 | 3869  | 1.26  | 98.89 |
| chr8 | 7079500 | 7081793 | 2294  | 0.01 | C_unshiu_00231 | 206136 | 208442 | 2307  | 0.75  | 98.23 |
| chr8 | 7108432 | 7123520 | 15089 | 0.06 | C_unshiu_01882 | 44314  | 29202  | 15113 | 33.41 | 99.49 |
| chr8 | 7150378 | 7151985 | 1608  | 0.01 | C_unshiu_00914 | 8603   | 10210  | 1608  | 1.39  | 99.94 |
| chr8 | 7151986 | 7153633 | 1648  | 0.01 | C_unshiu_00245 | 280046 | 281693 | 1648  | 0.55  | 100   |
| chr8 | 7153629 | 7159527 | 5899  | 0.02 | C_unshiu_00914 | 12399  | 18301  | 5903  | 5.11  | 99.9  |
| chr8 | 7170013 | 7171965 | 1953  | 0.01 | C_unshiu_00914 | 35499  | 37441  | 1943  | 1.68  | 98.21 |
| chr8 | 7176314 | 7178533 | 2220  | 0.01 | C_unshiu_00914 | 31257  | 33477  | 2221  | 1.92  | 99.14 |
| chr8 | 7195639 | 7197244 | 1606  | 0.01 | C_unshiu_00914 | 48332  | 49931  | 1600  | 1.38  | 99.44 |
| chr8 | 7197381 | 7199051 | 1671  | 0.01 | C_unshiu_00914 | 50047  | 51721  | 1675  | 1.45  | 98.27 |
| chr8 | 7205916 | 7227299 | 21384 | 0.09 | C_unshiu_00914 | 63706  | 85137  | 21432 | 18.55 | 98.97 |
| chr8 | 7231065 | 7258119 | 27055 | 0.11 | C_unshiu_00914 | 88254  | 115305 | 27052 | 23.41 | 99.87 |
| chr8 | 7302469 | 7306268 | 3800  | 0.02 | C_unshiu_02645 | 12253  | 8455   | 3799  | 18.04 | 99.45 |
| chr8 | 7308184 | 7309641 | 1458  | 0.01 | C_unshiu_02645 | 6016   | 4559   | 1458  | 6.92  | 100   |
| chr8 | 7310641 | 7312145 | 1505  | 0.01 | C_unshiu_00783 | 113831 | 112327 | 1505  | 1.15  | 99.6  |
| chr8 | 7312543 | 7313704 | 1162  | 0    | C_unshiu_02645 | 1215   | 66     | 1150  | 5.46  | 98.62 |
| chr8 | 7315115 | 7316207 | 1093  | 0    | C_unshiu_00355 | 227878 | 228970 | 1093  | 0.46  | 100   |
| chr8 | 7316423 | 7318809 | 2387  | 0.01 | C_unshiu_00783 | 110983 | 108597 | 2387  | 1.83  | 99.96 |
| chr8 | 7321114 | 7323041 | 1928  | 0.01 | C_unshiu_01630 | 29582  | 27655  | 1928  | 3.44  | 100   |
| chr8 | 7323042 | 7324340 | 1299  | 0.01 | C_unshiu_00783 | 103829 | 102531 | 1299  | 0.99  | 99.31 |
| chr8 | 7331449 | 7356255 | 24807 | 0.1  | C_unshiu_00783 | 91784  | 66929  | 24856 | 19.03 | 98.61 |
| chr8 | 7358548 | 7359622 | 1075  | 0    | C_unshiu_00340 | 49873  | 48799  | 1075  | 0.43  | 98.88 |
| chr8 | 7361167 | 7362391 | 1225  | 0.01 | C_unshiu_00340 | 47064  | 45840  | 1225  | 0.49  | 98.12 |
| chr8 | 7362392 | 7364436 | 2045  | 0.01 | C_unshiu_00783 | 66938  | 64892  | 2047  | 1.57  | 99.32 |
| chr8 | 7364431 | 7371085 | 6655  | 0.03 | C_unshiu_00783 | 63447  | 56769  | 6679  | 5.11  | 98.68 |
| chr8 | 7382028 | 7383891 | 1864  | 0.01 | C_unshiu_00783 | 48974  | 47093  | 1882  | 1.44  | 98.46 |
| chr8 | 7385528 | 7429746 | 44219 | 0.19 | C_unshiu_00783 | 44201  | 1      | 44201 | 33.84 | 99.3  |
| chr8 | 7434751 | 7450500 | 15750 | 0.07 | C_unshiu_00360 | 15702  | 1      | 15702 | 6.64  | 98.59 |
| chr8 | 7462718 | 7464647 | 1930  | 0.01 | C_unshiu_01072 | 73810  | 75739  | 1930  | 1.96  | 99.95 |
| chr8 | 7473473 | 7478388 | 4916  | 0.02 | C_unshiu_01072 | 81745  | 86688  | 4944  | 5.01  | 98.08 |
| chr8 | 7483064 | 7485250 | 2187  | 0.01 | C_unshiu_01072 | 90753  | 92936  | 2184  | 2.21  | 98.67 |
| chr8 | 7485256 | 7490258 | 5003  | 0.02 | C_unshiu_01072 | 93672  | 98674  | 5003  | 5.07  | 99.1  |
| chr8 | 7527544 | 7536174 | 8631  | 0.04 | C_unshiu_00485 | 13511  | 22122  | 8612  | 4.37  | 98.44 |
| chr8 | 7536173 | 7537532 | 1360  | 0.01 | C_unshiu_00067 | 496579 | 497938 | 1360  | 0.26  | 100   |

|      |         |         |       |      |                |        |        |       |       |       |
|------|---------|---------|-------|------|----------------|--------|--------|-------|-------|-------|
| chr8 | 7540840 | 7550575 | 9736  | 0.04 | C_unshiu_01031 | 102984 | 93170  | 9815  | 9.53  | 98.66 |
| chr8 | 7551214 | 7563897 | 12684 | 0.05 | C_unshiu_00485 | 33725  | 46447  | 12723 | 6.46  | 98.74 |
| chr8 | 7598608 | 7603627 | 5020  | 0.02 | C_unshiu_01136 | 39967  | 34933  | 5035  | 5.46  | 98.89 |
| chr8 | 7606551 | 7608019 | 1469  | 0.01 | C_unshiu_01136 | 33930  | 32448  | 1483  | 1.61  | 98.11 |
| chr8 | 7609693 | 7615647 | 5955  | 0.03 | C_unshiu_01136 | 30095  | 24171  | 5925  | 6.42  | 98.32 |
| chr8 | 7630827 | 7638551 | 7725  | 0.03 | C_unshiu_01136 | 10358  | 2608   | 7751  | 8.4   | 98.09 |
| chr8 | 7667917 | 7672335 | 4419  | 0.02 | C_unshiu_01419 | 34004  | 29587  | 4418  | 6.36  | 99.46 |
| chr8 | 7672512 | 7674574 | 2063  | 0.01 | C_unshiu_00573 | 67727  | 65665  | 2063  | 1.2   | 100   |
| chr8 | 7687756 | 7692531 | 4776  | 0.02 | C_unshiu_01419 | 16917  | 12139  | 4779  | 6.88  | 99.25 |
| chr8 | 7695126 | 7697113 | 1988  | 0.01 | C_unshiu_01419 | 4424   | 2437   | 1988  | 2.86  | 99.2  |
| chr8 | 7697176 | 7701551 | 4376  | 0.02 | C_unshiu_01419 | 4391   | 1      | 4391  | 6.32  | 98.43 |
| chr8 | 7701965 | 7706765 | 4801  | 0.02 | C_unshiu_00708 | 142874 | 138125 | 4750  | 3.32  | 98.61 |
| chr8 | 7707176 | 7708682 | 1507  | 0.01 | C_unshiu_00708 | 137273 | 135767 | 1507  | 1.05  | 100   |
| chr8 | 7708783 | 7709828 | 1046  | 0    | C_unshiu_00720 | 133818 | 132773 | 1046  | 0.74  | 100   |
| chr8 | 7713661 | 7718758 | 5098  | 0.02 | C_unshiu_00720 | 128245 | 123148 | 5098  | 3.6   | 100   |
| chr8 | 7718763 | 7725049 | 6287  | 0.03 | C_unshiu_00720 | 122802 | 116541 | 6262  | 4.43  | 98.84 |
| chr8 | 7725066 | 7727357 | 2292  | 0.01 | C_unshiu_00720 | 116200 | 113910 | 2291  | 1.62  | 99.52 |
| chr8 | 7727955 | 7732735 | 4781  | 0.02 | C_unshiu_00720 | 112806 | 108054 | 4753  | 3.36  | 98.45 |
| chr8 | 7730950 | 7733009 | 2060  | 0.01 | C_unshiu_00859 | 84891  | 86950  | 2060  | 1.69  | 98.93 |
| chr8 | 7733032 | 7735091 | 2060  | 0.01 | C_unshiu_00859 | 70810  | 72878  | 2069  | 1.7   | 99.18 |
| chr8 | 7735111 | 7739059 | 3949  | 0.02 | C_unshiu_00859 | 80937  | 84886  | 3950  | 3.24  | 99.54 |
| chr8 | 7738545 | 7744199 | 5655  | 0.02 | C_unshiu_00859 | 74977  | 80631  | 5655  | 4.64  | 99.91 |
| chr8 | 7767318 | 7768661 | 1344  | 0.01 | C_unshiu_01742 | 2406   | 3749   | 1344  | 2.64  | 99.93 |
| chr8 | 7769737 | 7778002 | 8266  | 0.03 | C_unshiu_01742 | 5089   | 13453  | 8365  | 16.43 | 98.07 |
| chr8 | 7775796 | 7778012 | 2217  | 0.01 | C_unshiu_00683 | 9318   | 7108   | 2211  | 1.49  | 98.92 |
| chr8 | 7781392 | 7788549 | 7158  | 0.03 | C_unshiu_01742 | 16537  | 23747  | 7211  | 14.17 | 98.15 |
| chr8 | 7788552 | 7790851 | 2300  | 0.01 | C_unshiu_01742 | 24165  | 26485  | 2321  | 4.56  | 98.06 |
| chr8 | 7796798 | 7798127 | 1330  | 0.01 | C_unshiu_01742 | 46261  | 44932  | 1330  | 2.61  | 98.5  |
| chr8 | 7831715 | 7836668 | 4954  | 0.02 | C_unshiu_03020 | 7411   | 12364  | 4954  | 40.07 | 99.88 |
| chr8 | 7843312 | 7846097 | 2786  | 0.01 | C_unshiu_01393 | 68900  | 66118  | 2783  | 3.92  | 98.78 |
| chr8 | 7869389 | 7877447 | 8059  | 0.03 | C_unshiu_02785 | 8317   | 16361  | 8045  | 44.22 | 99.59 |
| chr8 | 7880013 | 7893194 | 13182 | 0.06 | C_unshiu_01213 | 70979  | 84159  | 13181 | 15.66 | 99.73 |
| chr8 | 7888932 | 7898150 | 9219  | 0.04 | C_unshiu_01393 | 56320  | 47103  | 9218  | 13    | 98.96 |
| chr8 | 7899093 | 7901770 | 2678  | 0.01 | C_unshiu_01393 | 46672  | 43993  | 2680  | 3.78  | 98.25 |
| chr8 | 7925833 | 7927088 | 1256  | 0.01 | C_unshiu_01393 | 42651  | 41397  | 1255  | 1.77  | 99.44 |
| chr8 | 7930153 | 7940474 | 10322 | 0.04 | C_unshiu_01393 | 38995  | 28585  | 10411 | 14.68 | 98.35 |
| chr8 | 7941549 | 7943027 | 1479  | 0.01 | C_unshiu_00930 | 92351  | 93829  | 1479  | 1.3   | 99.86 |
| chr8 | 7943676 | 7946025 | 2350  | 0.01 | C_unshiu_00930 | 94800  | 97149  | 2350  | 2.07  | 100   |
| chr8 | 7946020 | 7950922 | 4903  | 0.02 | C_unshiu_00243 | 144485 | 139583 | 4903  | 1.63  | 100   |
| chr8 | 7952041 | 7955476 | 3436  | 0.01 | C_unshiu_00930 | 102600 | 106035 | 3436  | 3.02  | 100   |
| chr8 | 7955917 | 7969813 | 13897 | 0.06 | C_unshiu_01393 | 17584  | 3656   | 13929 | 19.64 | 98.44 |
| chr8 | 7978148 | 7984313 | 6166  | 0.03 | C_unshiu_00520 | 159645 | 153481 | 6165  | 3.33  | 99.89 |
| chr8 | 7984694 | 8000173 | 15480 | 0.07 | C_unshiu_00520 | 152742 | 137263 | 15480 | 8.35  | 99.9  |
| chr8 | 8007372 | 8055687 | 48316 | 0.2  | C_unshiu_00520 | 132302 | 83942  | 48361 | 26.09 | 98.53 |
| chr8 | 8058615 | 8060822 | 2208  | 0.01 | C_unshiu_00520 | 81530  | 79323  | 2208  | 1.19  | 100   |
| chr8 | 8092873 | 8098129 | 5257  | 0.02 | C_unshiu_00197 | 298315 | 293068 | 5248  | 1.55  | 98.61 |
| chr8 | 8098131 | 8100213 | 2083  | 0.01 | C_unshiu_00197 | 292808 | 290725 | 2084  | 0.62  | 99.28 |
| chr8 | 8131183 | 8155167 | 23985 | 0.1  | C_unshiu_01017 | 1      | 23900  | 23900 | 22.91 | 99.33 |
| chr8 | 8155181 | 8156888 | 1708  | 0.01 | C_unshiu_01017 | 23998  | 25705  | 1708  | 1.64  | 100   |
| chr8 | 8168595 | 8182232 | 13638 | 0.06 | C_unshiu_01017 | 36867  | 50486  | 13620 | 13.06 | 99.87 |
| chr8 | 8185854 | 8188208 | 2355  | 0.01 | C_unshiu_00508 | 2096   | 4449   | 2354  | 1.25  | 98.26 |
| chr8 | 8185854 | 8188209 | 2356  | 0.01 | C_unshiu_01009 | 26676  | 29039  | 2364  | 2.25  | 98.06 |
| chr8 | 8190310 | 8193833 | 3524  | 0.01 | C_unshiu_00142 | 282417 | 285929 | 3513  | 0.88  | 98.22 |
| chr8 | 8195390 | 8197509 | 2120  | 0.01 | C_unshiu_00142 | 286907 | 289028 | 2122  | 0.53  | 99.53 |
| chr8 | 8198690 | 8200296 | 1607  | 0.01 | C_unshiu_00926 | 96232  | 94624  | 1609  | 1.41  | 99.07 |
| chr8 | 8201128 | 8218011 | 16884 | 0.07 | C_unshiu_00329 | 92739  | 109592 | 16854 | 6.68  | 99.63 |
| chr8 | 8220033 | 8223789 | 3757  | 0.02 | C_unshiu_00329 | 110921 | 114689 | 3769  | 1.49  | 99.1  |
| chr8 | 8235324 | 8239873 | 4550  | 0.02 | C_unshiu_01208 | 79078  | 74523  | 4556  | 5.38  | 98.9  |
| chr8 | 8240647 | 8256206 | 15560 | 0.07 | C_unshiu_01208 | 73811  | 58222  | 15590 | 18.41 | 98.76 |
| chr8 | 8257781 | 8281872 | 24092 | 0.1  | C_unshiu_01208 | 55770  | 31605  | 24166 | 28.53 | 98.63 |
| chr8 | 8286509 | 8290490 | 3982  | 0.02 | C_unshiu_01208 | 27155  | 23158  | 3998  | 4.72  | 99.1  |
| chr8 | 8299358 | 8303995 | 4638  | 0.02 | C_unshiu_01208 | 16342  | 11695  | 4648  | 5.49  | 99.78 |
| chr8 | 8312008 | 8322453 | 10446 | 0.04 | C_unshiu_01208 | 10463  | 1      | 10463 | 12.35 | 99.67 |
| chr8 | 8313246 | 8323786 | 10541 | 0.04 | C_unshiu_00694 | 142487 | 131935 | 10553 | 7.29  | 99.74 |
| chr8 | 8324306 | 8327841 | 3536  | 0.01 | C_unshiu_00694 | 131559 | 128060 | 3500  | 2.42  | 98.59 |
| chr8 | 8332919 | 8335083 | 2165  | 0.01 | C_unshiu_01085 | 7926   | 10078  | 2153  | 2.21  | 98.44 |
| chr8 | 8335297 | 8338000 | 2704  | 0.01 | C_unshiu_01085 | 10214  | 12938  | 2725  | 2.8   | 98.72 |
| chr8 | 8340950 | 8351107 | 10158 | 0.04 | C_unshiu_01085 | 17253  | 27409  | 10157 | 10.42 | 99.59 |
| chr8 | 8352131 | 8356847 | 4717  | 0.02 | C_unshiu_01788 | 20222  | 15506  | 4717  | 9.66  | 100   |
| chr8 | 8360825 | 8362972 | 2148  | 0.01 | C_unshiu_01788 | 10483  | 8336   | 2148  | 4.4   | 100   |
| chr8 | 8396980 | 8403238 | 6259  | 0.03 | C_unshiu_01085 | 49523  | 55790  | 6268  | 6.43  | 99.17 |
| chr8 | 8422211 | 8453347 | 31137 | 0.13 | C_unshiu_01085 | 59319  | 90599  | 31281 | 32.09 | 98.62 |
| chr8 | 8454264 | 8455500 | 1237  | 0.01 | C_unshiu_02035 | 16081  | 14852  | 1230  | 3.13  | 99.11 |
| chr8 | 8456982 | 8463101 | 6120  | 0.03 | C_unshiu_02314 | 3212   | 9337   | 6126  | 20.75 | 99.28 |
| chr8 | 8473533 | 8474611 | 1079  | 0    | C_unshiu_00278 | 36741  | 35663  | 1079  | 0.39  | 98.33 |
| chr8 | 8482315 | 8484827 | 2513  | 0.01 | C_unshiu_02457 | 16     | 2560   | 2545  | 9.82  | 98.43 |
| chr8 | 8487835 | 8498784 | 10950 | 0.05 | C_unshiu_00949 | 5891   | 16778  | 10888 | 9.75  | 98.49 |
| chr8 | 8498786 | 8503057 | 4272  | 0.02 | C_unshiu_02457 | 5007   | 9276   | 4270  | 16.47 | 99.77 |
| chr8 | 8508035 | 8528462 | 20428 | 0.09 | C_unshiu_00949 | 25454  | 45901  | 20448 | 18.3  | 98.74 |

|      |         |         |       |      |                |        |        |       |       |       |
|------|---------|---------|-------|------|----------------|--------|--------|-------|-------|-------|
| chr8 | 8528654 | 8533441 | 4788  | 0.02 | C_unshiu_00949 | 46133  | 50905  | 4773  | 4.27  | 98.96 |
| chr8 | 8536576 | 8538099 | 1524  | 0.01 | C_unshiu_00949 | 53037  | 54554  | 1518  | 1.36  | 98.36 |
| chr8 | 8560409 | 8567579 | 7171  | 0.03 | C_unshiu_00949 | 76966  | 84149  | 7184  | 6.43  | 98.86 |
| chr8 | 8582843 | 8587509 | 4667  | 0.02 | C_unshiu_00949 | 96380  | 101062 | 4683  | 4.19  | 98.25 |
| chr8 | 8595247 | 8600651 | 5405  | 0.02 | C_unshiu_02374 | 21108  | 15705  | 5404  | 19.42 | 98.98 |
| chr8 | 8603993 | 8607255 | 3263  | 0.01 | C_unshiu_02374 | 11029  | 7752   | 3278  | 11.78 | 98.38 |
| chr8 | 8614262 | 8620738 | 6477  | 0.03 | C_unshiu_02374 | 6452   | 1      | 6452  | 23.19 | 98.01 |
| chr8 | 8650616 | 8654388 | 3773  | 0.02 | C_unshiu_00507 | 18651  | 22441  | 3791  | 2     | 98.11 |
| chr8 | 8655512 | 8659398 | 3887  | 0.02 | C_unshiu_01153 | 21064  | 24951  | 3888  | 4.31  | 99.77 |
| chr8 | 8659396 | 8666782 | 7387  | 0.03 | C_unshiu_00507 | 26710  | 34066  | 7357  | 3.89  | 98.38 |
| chr8 | 8659497 | 8679827 | 20331 | 0.09 | C_unshiu_01153 | 36251  | 56534  | 20284 | 22.5  | 98.83 |
| chr8 | 8679969 | 8690422 | 10454 | 0.04 | C_unshiu_01153 | 56616  | 67062  | 10447 | 11.59 | 99.85 |
| chr8 | 8690423 | 8692882 | 2460  | 0.01 | C_unshiu_00787 | 87191  | 89650  | 2460  | 1.89  | 100   |
| chr8 | 8692876 | 8694069 | 1194  | 0.01 | C_unshiu_01153 | 70230  | 71423  | 1194  | 1.32  | 99.58 |
| chr8 | 8696109 | 8697165 | 1057  | 0    | C_unshiu_01153 | 73963  | 75019  | 1057  | 1.17  | 99.91 |
| chr8 | 8699199 | 8704126 | 4928  | 0.02 | C_unshiu_01153 | 82863  | 77936  | 4928  | 5.47  | 99.96 |
| chr8 | 8712698 | 8717156 | 4459  | 0.02 | C_unshiu_00643 | 80     | 4520   | 4441  | 2.81  | 99.6  |
| chr8 | 8718897 | 8734536 | 15640 | 0.07 | C_unshiu_00643 | 6724   | 22369  | 15646 | 9.89  | 99.96 |
| chr8 | 8739883 | 8747549 | 7667  | 0.03 | C_unshiu_00733 | 87688  | 95346  | 7659  | 5.53  | 99.62 |
| chr8 | 8747425 | 8753853 | 6429  | 0.03 | C_unshiu_00733 | 95812  | 102227 | 6416  | 4.63  | 99.52 |
| chr8 | 8753860 | 8788662 | 34803 | 0.15 | C_unshiu_00244 | 119135 | 84392  | 34744 | 11.57 | 99.61 |
| chr8 | 8785694 | 8789436 | 3743  | 0.02 | C_unshiu_00733 | 127269 | 130986 | 3718  | 2.69  | 98.29 |
| chr8 | 8789442 | 8792031 | 2590  | 0.01 | C_unshiu_00733 | 135865 | 138454 | 2590  | 1.87  | 99.11 |
| chr8 | 8804080 | 8823083 | 19004 | 0.08 | C_unshiu_00244 | 67868  | 48849  | 19020 | 6.34  | 98.23 |
| chr8 | 8825159 | 8829281 | 4123  | 0.02 | C_unshiu_01081 | 9466   | 13590  | 4125  | 4.21  | 99.03 |
| chr8 | 8828065 | 8830696 | 2632  | 0.01 | C_unshiu_00279 | 210066 | 212684 | 2619  | 0.94  | 98.48 |
| chr8 | 8831371 | 8857477 | 26107 | 0.11 | C_unshiu_00244 | 45694  | 19583  | 26112 | 8.7   | 99.59 |
| chr8 | 8859032 | 8861958 | 2927  | 0.01 | C_unshiu_01081 | 26068  | 28987  | 2920  | 2.98  | 99.76 |
| chr8 | 8863169 | 8865204 | 2036  | 0.01 | C_unshiu_01081 | 30659  | 32695  | 2037  | 2.08  | 99.56 |
| chr8 | 8869121 | 8872832 | 3712  | 0.02 | C_unshiu_00244 | 8649   | 4932   | 3718  | 1.24  | 98.15 |
| chr8 | 8876594 | 8882277 | 5684  | 0.02 | C_unshiu_01081 | 49928  | 55638  | 5711  | 5.83  | 98.76 |
| chr8 | 8882355 | 8893975 | 11621 | 0.05 | C_unshiu_01081 | 56810  | 68507  | 11698 | 11.95 | 98.16 |
| chr8 | 8893985 | 8895006 | 1022  | 0    | C_unshiu_01081 | 69581  | 70599  | 1019  | 1.04  | 98.34 |
| chr8 | 8917428 | 8921654 | 4227  | 0.02 | C_unshiu_01793 | 1074   | 5298   | 4225  | 8.67  | 99.48 |
| chr8 | 8948978 | 8950822 | 1845  | 0.01 | C_unshiu_01793 | 27437  | 29281  | 1845  | 3.79  | 100   |
| chr8 | 8953928 | 8957668 | 3741  | 0.02 | C_unshiu_01793 | 31356  | 35103  | 3748  | 7.69  | 98.91 |
| chr8 | 8959306 | 8964089 | 4784  | 0.02 | C_unshiu_01793 | 35476  | 40260  | 4785  | 9.82  | 99.56 |
| chr8 | 8965661 | 8968429 | 2769  | 0.01 | C_unshiu_01793 | 40610  | 43376  | 2767  | 5.68  | 99.6  |
| chr8 | 8988409 | 8990196 | 1788  | 0.01 | C_unshiu_01162 | 83867  | 82078  | 1790  | 2     | 98.83 |
| chr8 | 9013544 | 9021591 | 8048  | 0.03 | C_unshiu_01162 | 58392  | 50342  | 8051  | 8.98  | 99.42 |
| chr8 | 9046095 | 9053664 | 7570  | 0.03 | C_unshiu_01162 | 33871  | 26290  | 7582  | 8.46  | 99.31 |
| chr8 | 9061345 | 9064419 | 3075  | 0.01 | C_unshiu_01425 | 62539  | 65614  | 3076  | 4.48  | 98.02 |
| chr8 | 9064596 | 9066380 | 1785  | 0.01 | C_unshiu_01425 | 54815  | 53026  | 1790  | 2.61  | 98.55 |
| chr8 | 9066376 | 9080998 | 14623 | 0.06 | C_unshiu_01425 | 52753  | 38157  | 14597 | 21.27 | 99    |
| chr8 | 9081311 | 9092336 | 11026 | 0.05 | C_unshiu_01425 | 37323  | 26270  | 11054 | 16.11 | 98.35 |
| chr8 | 9096342 | 9097589 | 1248  | 0.01 | C_unshiu_01425 | 19846  | 21095  | 1250  | 1.82  | 99.12 |
| chr8 | 9099764 | 9105455 | 5692  | 0.02 | C_unshiu_01425 | 19856  | 14157  | 5700  | 8.31  | 99.58 |
| chr8 | 9105969 | 9119045 | 13077 | 0.06 | C_unshiu_01425 | 13098  | 1      | 13098 | 19.09 | 99.69 |
| chr8 | 9121450 | 9129171 | 7722  | 0.03 | C_unshiu_02368 | 1      | 7742   | 7742  | 27.74 | 98.8  |
| chr8 | 9128845 | 9131003 | 2159  | 0.01 | C_unshiu_02368 | 7508   | 9668   | 2161  | 7.74  | 99.58 |
| chr8 | 9139280 | 9144167 | 4888  | 0.02 | C_unshiu_02531 | 18561  | 13676  | 4886  | 20.5  | 99.35 |
| chr8 | 9139939 | 9144167 | 4229  | 0.02 | C_unshiu_00720 | 78872  | 83124  | 4253  | 3.01  | 98.36 |
| chr8 | 9145931 | 9148258 | 2328  | 0.01 | C_unshiu_00720 | 83649  | 85978  | 2330  | 1.65  | 99.57 |
| chr8 | 9149073 | 9153878 | 4806  | 0.02 | C_unshiu_00720 | 86507  | 91310  | 4804  | 3.4   | 98.44 |
| chr8 | 9160354 | 9161885 | 1532  | 0.01 | C_unshiu_00452 | 186624 | 188155 | 1532  | 0.74  | 100   |
| chr8 | 9177074 | 9178276 | 1203  | 0.01 | C_unshiu_00082 | 265485 | 266687 | 1203  | 0.25  | 99.83 |
| chr8 | 9186514 | 9187513 | 1000  | 0    | C_unshiu_01056 | 94950  | 93950  | 1001  | 1     | 98.1  |
| chr8 | 9210504 | 9221718 | 11215 | 0.05 | C_unshiu_01305 | 26446  | 15249  | 11198 | 14.56 | 99.79 |
| chr8 | 9265271 | 9269184 | 3914  | 0.02 | C_unshiu_00593 | 47540  | 51453  | 3914  | 2.32  | 99.95 |
| chr8 | 9270568 | 9280425 | 9858  | 0.04 | C_unshiu_00593 | 53012  | 62823  | 9812  | 5.81  | 98.96 |
| chr8 | 9282253 | 9288637 | 6385  | 0.03 | C_unshiu_00593 | 63275  | 69659  | 6385  | 3.78  | 99.98 |
| chr8 | 9289727 | 9291553 | 1827  | 0.01 | C_unshiu_00593 | 71061  | 72887  | 1827  | 1.08  | 100   |
| chr8 | 9291748 | 9296375 | 4628  | 0.02 | C_unshiu_00593 | 73385  | 78017  | 4633  | 2.75  | 99.89 |
| chr8 | 9296890 | 9307498 | 10609 | 0.04 | C_unshiu_00593 | 80989  | 91572  | 10584 | 6.27  | 99.44 |
| chr8 | 9315928 | 9328839 | 12912 | 0.05 | C_unshiu_00878 | 52588  | 39692  | 12897 | 10.79 | 99.85 |
| chr8 | 9337472 | 9370449 | 32978 | 0.14 | C_unshiu_01360 | 1      | 32974  | 32974 | 44.85 | 99.48 |
| chr8 | 9372906 | 9381485 | 8580  | 0.04 | C_unshiu_01360 | 35829  | 44435  | 8607  | 11.71 | 98.65 |
| chr8 | 9381494 | 9384215 | 2722  | 0.01 | C_unshiu_01360 | 46813  | 49534  | 2722  | 3.7   | 99.89 |
| chr8 | 9392348 | 9393858 | 1511  | 0.01 | C_unshiu_01015 | 69385  | 67875  | 1511  | 1.45  | 99.93 |
| chr8 | 9431804 | 9434895 | 3092  | 0.01 | C_unshiu_00713 | 119615 | 116531 | 3085  | 2.17  | 98.55 |
| chr8 | 9434891 | 9436169 | 1279  | 0.01 | C_unshiu_00713 | 116308 | 115029 | 1280  | 0.9   | 98.99 |
| chr8 | 9439828 | 9449342 | 9515  | 0.04 | C_unshiu_02254 | 14844  | 5362   | 9483  | 30.07 | 98.02 |
| chr8 | 9451179 | 9453352 | 2174  | 0.01 | C_unshiu_00086 | 400180 | 402353 | 2174  | 0.46  | 100   |
| chr8 | 9453345 | 9456294 | 2950  | 0.01 | C_unshiu_00713 | 104402 | 101453 | 2950  | 2.08  | 99.56 |
| chr8 | 9462672 | 9467058 | 4387  | 0.02 | C_unshiu_02254 | 4376   | 1      | 4376  | 13.88 | 98.86 |
| chr8 | 9469434 | 9471392 | 1959  | 0.01 | C_unshiu_01434 | 68113  | 66147  | 1967  | 2.89  | 98.23 |
| chr8 | 9469951 | 9474861 | 4911  | 0.02 | C_unshiu_02410 | 10859  | 5946   | 4914  | 18.14 | 99.59 |
| chr8 | 9475046 | 9478427 | 3382  | 0.01 | C_unshiu_02410 | 5345   | 1958   | 3388  | 12.51 | 98.17 |
| chr8 | 9475819 | 9487561 | 11743 | 0.05 | C_unshiu_01434 | 62394  | 50612  | 11783 | 17.3  | 98.91 |

|      |          |          |       |      |                |        |        |       |       |       |
|------|----------|----------|-------|------|----------------|--------|--------|-------|-------|-------|
| chr8 | 9492022  | 9494168  | 2147  | 0.01 | C_unshiu_01434 | 45211  | 43046  | 2166  | 3.18  | 98.48 |
| chr8 | 9494185  | 9496080  | 1896  | 0.01 | C_unshiu_01434 | 42465  | 40570  | 1896  | 2.78  | 99.95 |
| chr8 | 9496377  | 9508947  | 12571 | 0.05 | C_unshiu_01434 | 39968  | 27357  | 12612 | 18.52 | 99.03 |
| chr8 | 9518615  | 9525234  | 6620  | 0.03 | C_unshiu_01434 | 16094  | 9518   | 6577  | 9.66  | 98.07 |
| chr8 | 9526032  | 9531262  | 5231  | 0.02 | C_unshiu_01434 | 9527   | 4286   | 5242  | 7.7   | 98.48 |
| chr8 | 9531937  | 9535330  | 3394  | 0.01 | C_unshiu_01434 | 3417   | 1      | 3417  | 5.02  | 98.83 |
| chr8 | 9537537  | 9542773  | 5237  | 0.02 | C_unshiu_02618 | 1      | 5232   | 5232  | 24.12 | 99.05 |
| chr8 | 9564671  | 9567999  | 3329  | 0.01 | C_unshiu_01665 | 51056  | 54385  | 3330  | 6.12  | 98.95 |
| chr8 | 9567376  | 9575672  | 8297  | 0.04 | C_unshiu_01496 | 20760  | 29088  | 8329  | 13.12 | 98.98 |
| chr8 | 9579158  | 9584041  | 4884  | 0.02 | C_unshiu_01496 | 31624  | 36509  | 4886  | 7.69  | 98.57 |
| chr8 | 9584304  | 9585426  | 1123  | 0    | C_unshiu_00029 | 478011 | 479133 | 1123  | 0.16  | 100   |
| chr8 | 9586646  | 9591036  | 4391  | 0.02 | C_unshiu_01496 | 37904  | 42316  | 4413  | 6.95  | 98.51 |
| chr8 | 9591681  | 9611871  | 20191 | 0.09 | C_unshiu_01496 | 43362  | 63506  | 20145 | 31.72 | 98.32 |
| chr8 | 9611617  | 9626181  | 14565 | 0.06 | C_unshiu_01599 | 50769  | 36159  | 14611 | 25.41 | 98.7  |
| chr8 | 9627636  | 9630442  | 2807  | 0.01 | C_unshiu_01599 | 35946  | 33138  | 2809  | 4.89  | 98.58 |
| chr8 | 9650098  | 9652037  | 1940  | 0.01 | C_unshiu_01599 | 12757  | 10815  | 1943  | 3.38  | 98.56 |
| chr8 | 9684352  | 9704231  | 19880 | 0.08 | C_unshiu_00598 | 30347  | 10468  | 19880 | 11.82 | 99.74 |
| chr8 | 9702921  | 9706024  | 3104  | 0.01 | C_unshiu_00658 | 80177  | 83250  | 3074  | 1.99  | 98.14 |
| chr8 | 9710239  | 9723786  | 13548 | 0.06 | C_unshiu_00658 | 87186  | 100747 | 13562 | 8.79  | 99.43 |
| chr8 | 9727808  | 9738814  | 11007 | 0.05 | C_unshiu_00658 | 103648 | 114586 | 10939 | 7.09  | 98.36 |
| chr8 | 9738816  | 9742592  | 3777  | 0.02 | C_unshiu_00658 | 114751 | 118538 | 3788  | 2.46  | 99.05 |
| chr8 | 9749986  | 9758165  | 8180  | 0.03 | C_unshiu_00658 | 125332 | 133526 | 8195  | 5.31  | 98.2  |
| chr8 | 9758920  | 9777453  | 18534 | 0.08 | C_unshiu_00658 | 134810 | 153331 | 18522 | 12    | 99.25 |
| chr8 | 9779224  | 9780581  | 1358  | 0.01 | C_unshiu_00425 | 95998  | 94641  | 1358  | 0.63  | 100   |
| chr8 | 9781597  | 9785582  | 3986  | 0.02 | C_unshiu_00425 | 93790  | 89805  | 3986  | 1.83  | 99.85 |
| chr8 | 9790526  | 9794731  | 4206  | 0.02 | C_unshiu_00425 | 85070  | 80902  | 4169  | 1.92  | 98.03 |
| chr8 | 9869758  | 9871400  | 1643  | 0.01 | C_unshiu_02301 | 24080  | 22438  | 1643  | 5.5   | 99.03 |
| chr8 | 9874172  | 9875494  | 1323  | 0.01 | C_unshiu_02301 | 21736  | 20414  | 1323  | 4.43  | 100   |
| chr8 | 9875487  | 9877574  | 2088  | 0.01 | C_unshiu_00265 | 236753 | 234666 | 2088  | 0.73  | 100   |
| chr8 | 9877575  | 9882534  | 4960  | 0.02 | C_unshiu_02301 | 17713  | 12753  | 4961  | 16.62 | 98.95 |
| chr8 | 9887581  | 9894105  | 6525  | 0.03 | C_unshiu_02301 | 8447   | 1923   | 6525  | 21.85 | 99.85 |
| chr8 | 9894120  | 9895891  | 1772  | 0.01 | C_unshiu_02301 | 1771   | 1      | 1771  | 5.93  | 99.94 |
| chr8 | 9896857  | 9902130  | 5274  | 0.02 | C_unshiu_00199 | 336596 | 331331 | 5266  | 1.56  | 98.58 |
| chr8 | 9953358  | 9991188  | 37831 | 0.16 | C_unshiu_00199 | 281453 | 243435 | 38019 | 11.3  | 98.84 |
| chr8 | 9993153  | 10006049 | 12897 | 0.05 | C_unshiu_00199 | 240379 | 227441 | 12939 | 3.84  | 99.13 |
| chr8 | 10007301 | 10012616 | 5316  | 0.02 | C_unshiu_00199 | 227449 | 222177 | 5273  | 1.57  | 98.12 |
| chr8 | 10016046 | 10027526 | 11481 | 0.05 | C_unshiu_00199 | 219377 | 207922 | 11456 | 3.4   | 98.63 |
| chr8 | 10031104 | 10035928 | 4825  | 0.02 | C_unshiu_00199 | 203002 | 198161 | 4842  | 1.44  | 98.66 |
| chr8 | 10057677 | 10069568 | 11892 | 0.05 | C_unshiu_00199 | 172353 | 160440 | 11914 | 3.54  | 98.98 |
| chr8 | 10069559 | 10085489 | 15931 | 0.07 | C_unshiu_00199 | 159599 | 143553 | 16047 | 4.77  | 98.29 |
| chr8 | 10086912 | 10096706 | 9795  | 0.04 | C_unshiu_00199 | 142926 | 133097 | 9830  | 2.92  | 99.19 |
| chr8 | 10098114 | 10100965 | 2852  | 0.01 | C_unshiu_00199 | 135133 | 132281 | 2853  | 0.85  | 99.19 |
| chr8 | 10103121 | 10110012 | 6892  | 0.03 | C_unshiu_00199 | 131797 | 124858 | 6940  | 2.06  | 98.57 |
| chr8 | 10112712 | 10122505 | 9794  | 0.04 | C_unshiu_00199 | 123308 | 113462 | 9847  | 2.93  | 98.11 |
| chr8 | 10129522 | 10137390 | 7869  | 0.03 | C_unshiu_00199 | 101159 | 93295  | 7865  | 2.34  | 99.12 |
| chr8 | 10142638 | 10151724 | 9087  | 0.04 | C_unshiu_00199 | 88502  | 79351  | 9152  | 2.72  | 98.57 |
| chr8 | 10173515 | 10174597 | 1083  | 0    | C_unshiu_00199 | 57543  | 56456  | 1088  | 0.32  | 98.99 |
| chr8 | 10189331 | 10206904 | 17574 | 0.07 | C_unshiu_00199 | 38959  | 21375  | 17585 | 5.22  | 98.1  |
| chr8 | 10202373 | 10207572 | 5200  | 0.02 | C_unshiu_00995 | 7088   | 12291  | 5204  | 4.87  | 99.29 |
| chr8 | 10214105 | 10223402 | 9298  | 0.04 | C_unshiu_00199 | 9302   | 1      | 9302  | 2.76  | 98.95 |
| chr8 | 10217075 | 10225492 | 8418  | 0.04 | C_unshiu_00995 | 20283  | 28698  | 8416  | 7.88  | 99.02 |
| chr8 | 10227602 | 10232289 | 4688  | 0.02 | C_unshiu_00995 | 29616  | 34292  | 4677  | 4.38  | 99.1  |
| chr8 | 10252616 | 10255753 | 3138  | 0.01 | C_unshiu_00995 | 50345  | 53491  | 3147  | 2.95  | 98.76 |
| chr8 | 10268722 | 10271396 | 2675  | 0.01 | C_unshiu_00995 | 66492  | 69162  | 2671  | 2.5   | 98.18 |
| chr8 | 10285090 | 10286419 | 1330  | 0.01 | C_unshiu_00264 | 232502 | 233836 | 1335  | 0.47  | 98.58 |
| chr8 | 10287063 | 10291140 | 4078  | 0.02 | C_unshiu_00264 | 235016 | 239061 | 4046  | 1.42  | 98.63 |
| chr8 | 10324610 | 10325982 | 1373  | 0.01 | C_unshiu_00264 | 256412 | 257784 | 1373  | 0.48  | 100   |
| chr8 | 10329955 | 10337092 | 7138  | 0.03 | C_unshiu_00264 | 257938 | 265077 | 7140  | 2.51  | 99.8  |
| chr8 | 10337905 | 10344526 | 6622  | 0.03 | C_unshiu_02179 | 17327  | 10706  | 6622  | 19.46 | 99.82 |
| chr8 | 10350712 | 10355974 | 5263  | 0.02 | C_unshiu_02764 | 17663  | 12407  | 5257  | 27.89 | 99.37 |
| chr8 | 10357316 | 10360810 | 3495  | 0.01 | C_unshiu_02764 | 10625  | 7131   | 3495  | 18.54 | 99.31 |
| chr8 | 10361601 | 10363486 | 1886  | 0.01 | C_unshiu_02764 | 7393   | 5508   | 1886  | 10.01 | 99.58 |
| chr8 | 10369169 | 10372154 | 2986  | 0.01 | C_unshiu_00878 | 113419 | 110430 | 2990  | 2.5   | 99.5  |
| chr8 | 10373047 | 10377148 | 4102  | 0.02 | C_unshiu_00866 | 118901 | 114794 | 4108  | 3.4   | 98.78 |
| chr8 | 10384743 | 10390536 | 5794  | 0.02 | C_unshiu_00866 | 107365 | 101571 | 5795  | 4.8   | 98.52 |
| chr8 | 10409642 | 10411632 | 1991  | 0.01 | C_unshiu_01736 | 7517   | 9500   | 1984  | 3.87  | 98.5  |
| chr8 | 10414623 | 10417399 | 2777  | 0.01 | C_unshiu_01736 | 9518   | 12296  | 2779  | 5.43  | 99.14 |
| chr8 | 10422879 | 10430478 | 7600  | 0.03 | C_unshiu_01736 | 16256  | 23864  | 7609  | 14.86 | 99.01 |
| chr8 | 10440790 | 10452803 | 12014 | 0.05 | C_unshiu_01736 | 29951  | 41994  | 12044 | 23.52 | 99.43 |
| chr8 | 10453011 | 10458727 | 5717  | 0.02 | C_unshiu_01736 | 42624  | 48314  | 5691  | 11.11 | 99.2  |
| chr8 | 10467603 | 10485151 | 17549 | 0.07 | C_unshiu_00331 | 224139 | 241707 | 17569 | 6.97  | 98.53 |
| chr8 | 10485551 | 10494908 | 9358  | 0.04 | C_unshiu_00323 | 68838  | 59455  | 9384  | 3.68  | 98.84 |
| chr8 | 10506399 | 10509269 | 2871  | 0.01 | C_unshiu_00323 | 43911  | 41070  | 2842  | 1.11  | 98.26 |
| chr8 | 10510257 | 10511580 | 1324  | 0.01 | C_unshiu_00323 | 39889  | 38566  | 1324  | 0.52  | 100   |
| chr8 | 10519592 | 10520650 | 1059  | 0    | C_unshiu_00484 | 188839 | 187781 | 1059  | 0.54  | 99.81 |
| chr8 | 10520695 | 10546185 | 25491 | 0.11 | C_unshiu_00323 | 32091  | 6604   | 25488 | 9.99  | 99.53 |
| chr8 | 10546832 | 10553029 | 6198  | 0.03 | C_unshiu_00323 | 6265   | 1      | 6265  | 2.46  | 98.05 |
| chr8 | 10559908 | 10561034 | 1127  | 0    | C_unshiu_00484 | 169242 | 168122 | 1121  | 0.57  | 98.05 |
| chr8 | 10561035 | 10579835 | 18801 | 0.08 | C_unshiu_00484 | 168018 | 149108 | 18911 | 9.6   | 98.6  |

|      |          |          |       |      |                |        |        |       |       |       |
|------|----------|----------|-------|------|----------------|--------|--------|-------|-------|-------|
| chr8 | 10579891 | 10581215 | 1325  | 0.01 | C_unshiu_00484 | 148813 | 147489 | 1325  | 0.67  | 100   |
| chr8 | 10582708 | 10585043 | 2336  | 0.01 | C_unshiu_01121 | 91485  | 89155  | 2331  | 2.48  | 99.1  |
| chr8 | 10585060 | 10597602 | 12543 | 0.05 | C_unshiu_01121 | 88667  | 76125  | 12543 | 13.37 | 99.63 |
| chr8 | 10598465 | 10605418 | 6954  | 0.03 | C_unshiu_01121 | 74982  | 68024  | 6959  | 7.42  | 98.56 |
| chr8 | 10606863 | 10612164 | 5302  | 0.02 | C_unshiu_01121 | 70580  | 65280  | 5301  | 5.65  | 98.29 |
| chr8 | 10615909 | 10623028 | 7120  | 0.03 | C_unshiu_01121 | 62665  | 55530  | 7136  | 7.6   | 98.23 |
| chr8 | 10632183 | 10640483 | 8301  | 0.04 | C_unshiu_01121 | 48059  | 39753  | 8307  | 8.85  | 99.1  |
| chr8 | 10640717 | 10645111 | 4395  | 0.02 | C_unshiu_01121 | 38535  | 34127  | 4409  | 4.7   | 98.26 |
| chr8 | 10646453 | 10652354 | 5902  | 0.02 | C_unshiu_01121 | 33124  | 27244  | 5881  | 6.27  | 98.93 |
| chr8 | 10654913 | 10656774 | 1862  | 0.01 | C_unshiu_01121 | 27317  | 25445  | 1873  | 2     | 98.03 |
| chr8 | 10661844 | 10668450 | 6607  | 0.03 | C_unshiu_01152 | 86635  | 80044  | 6592  | 7.27  | 98.97 |
| chr8 | 10669675 | 10671441 | 1767  | 0.01 | C_unshiu_01121 | 14692  | 12926  | 1767  | 1.88  | 99.38 |
| chr8 | 10671797 | 10673670 | 1874  | 0.01 | C_unshiu_01152 | 76187  | 74315  | 1873  | 2.06  | 98.93 |
| chr8 | 10673751 | 10696545 | 22795 | 0.1  | C_unshiu_01152 | 74210  | 51399  | 22812 | 25.14 | 98.78 |
| chr8 | 10698180 | 10700492 | 2313  | 0.01 | C_unshiu_01152 | 51861  | 49552  | 2310  | 2.55  | 99.52 |
| chr8 | 10701262 | 10704035 | 2774  | 0.01 | C_unshiu_01152 | 48717  | 45940  | 2778  | 3.06  | 99.78 |
| chr8 | 10714470 | 10715535 | 1066  | 0    | C_unshiu_01152 | 45094  | 44028  | 1067  | 1.18  | 99.81 |
| chr8 | 10725874 | 10727241 | 1368  | 0.01 | C_unshiu_01152 | 31714  | 30344  | 1371  | 1.51  | 99.42 |
| chr8 | 10733339 | 10735154 | 1816  | 0.01 | C_unshiu_01152 | 25330  | 23515  | 1816  | 2     | 99.89 |
| chr8 | 10736520 | 10750873 | 14354 | 0.06 | C_unshiu_01152 | 21295  | 6889   | 14407 | 15.88 | 99.47 |
| chr8 | 10753088 | 10754167 | 1080  | 0    | C_unshiu_02861 | 5477   | 6556   | 1080  | 6.53  | 100   |
| chr8 | 10754251 | 10761011 | 6761  | 0.03 | C_unshiu_02861 | 6651   | 13412  | 6762  | 40.88 | 99.91 |
| chr8 | 10761005 | 10763518 | 2514  | 0.01 | C_unshiu_00610 | 135687 | 133174 | 2514  | 1.52  | 100   |
| chr8 | 10763519 | 10769408 | 5890  | 0.02 | C_unshiu_02294 | 19998  | 14076  | 5923  | 19.71 | 98.32 |
| chr8 | 10772985 | 10775014 | 2030  | 0.01 | C_unshiu_02294 | 12500  | 10471  | 2030  | 6.76  | 99.36 |
| chr8 | 10775014 | 10781138 | 6125  | 0.03 | C_unshiu_02294 | 10346  | 4187   | 6160  | 20.5  | 98.27 |
| chr8 | 10797746 | 10799058 | 1313  | 0.01 | C_unshiu_02093 | 32689  | 31371  | 1319  | 3.58  | 98.79 |
| chr8 | 10803189 | 10809674 | 6486  | 0.03 | C_unshiu_01028 | 64221  | 70699  | 6479  | 6.28  | 99.51 |
| chr8 | 10810420 | 10813518 | 3099  | 0.01 | C_unshiu_01028 | 71934  | 75032  | 3099  | 3     | 99.9  |
| chr8 | 10814245 | 10827879 | 13635 | 0.06 | C_unshiu_00506 | 170680 | 184314 | 13635 | 7.19  | 99.97 |
| chr8 | 10827981 | 10850615 | 22635 | 0.1  | C_unshiu_01081 | 92501  | 69866  | 22636 | 23.12 | 99.4  |
| chr8 | 10845596 | 10854807 | 9212  | 0.04 | C_unshiu_00861 | 1      | 9213   | 9213  | 7.58  | 99.83 |
| chr8 | 10858135 | 10860524 | 2390  | 0.01 | C_unshiu_00169 | 90610  | 88221  | 2390  | 0.65  | 100   |
| chr8 | 10862927 | 10885957 | 23031 | 0.1  | C_unshiu_00169 | 85474  | 62463  | 23012 | 6.25  | 99.92 |
| chr8 | 10865961 | 10890992 | 25032 | 0.11 | C_unshiu_00169 | 82440  | 57428  | 25013 | 6.8   | 99.92 |
| chr8 | 10892620 | 10901280 | 8661  | 0.04 | C_unshiu_00169 | 55420  | 46761  | 8660  | 2.35  | 99.94 |
| chr8 | 10901197 | 10933711 | 32515 | 0.14 | C_unshiu_00169 | 46668  | 14145  | 32524 | 8.84  | 99.82 |
| chr8 | 10933641 | 10941659 | 8019  | 0.03 | C_unshiu_00169 | 14146  | 6128   | 8019  | 2.18  | 100   |
| chr8 | 10942336 | 10943586 | 1251  | 0.01 | C_unshiu_01108 | 74800  | 73550  | 1251  | 1.31  | 99.92 |
| chr8 | 10946063 | 10948178 | 2116  | 0.01 | C_unshiu_00402 | 77210  | 79329  | 2120  | 0.95  | 99.25 |
| chr8 | 10946714 | 10966295 | 19582 | 0.08 | C_unshiu_01108 | 70495  | 51035  | 19461 | 20.41 | 98.74 |
| chr8 | 10970943 | 10972480 | 1538  | 0.01 | C_unshiu_00233 | 245276 | 246813 | 1538  | 0.5   | 99.61 |
| chr8 | 10974037 | 10984447 | 10411 | 0.04 | C_unshiu_00233 | 248746 | 259131 | 10386 | 3.4   | 99.76 |
| chr8 | 10984439 | 10985943 | 1505  | 0.01 | C_unshiu_01474 | 57233  | 55729  | 1505  | 2.32  | 100   |
| chr8 | 10985944 | 10990545 | 4602  | 0.02 | C_unshiu_00393 | 126963 | 122369 | 4595  | 2.05  | 98.63 |
| chr8 | 10988241 | 10998138 | 9898  | 0.04 | C_unshiu_00233 | 262353 | 272221 | 9869  | 3.23  | 98.7  |
| chr8 | 10998145 | 11017946 | 19802 | 0.08 | C_unshiu_01938 | 25962  | 6158   | 19805 | 45.77 | 98.68 |
| chr8 | 11034101 | 11035495 | 1395  | 0.01 | C_unshiu_02765 | 6744   | 5350   | 1395  | 7.41  | 99.5  |
| chr8 | 11037393 | 11038798 | 1406  | 0.01 | C_unshiu_01829 | 24207  | 25608  | 1402  | 2.96  | 98.79 |
| chr8 | 11040969 | 11047576 | 6608  | 0.03 | C_unshiu_01829 | 26066  | 32685  | 6620  | 13.96 | 98.14 |
| chr8 | 11073654 | 11077168 | 3515  | 0.01 | C_unshiu_00028 | 448338 | 451851 | 3514  | 0.49  | 99.46 |
| chr8 | 11079644 | 11084648 | 5005  | 0.02 | C_unshiu_00787 | 106866 | 101862 | 5005  | 3.84  | 100   |
| chr8 | 11084861 | 11090785 | 5925  | 0.03 | C_unshiu_00787 | 101231 | 95306  | 5926  | 4.55  | 99.66 |
| chr8 | 11091061 | 11094850 | 3790  | 0.02 | C_unshiu_00787 | 95213  | 91420  | 3794  | 2.91  | 99.55 |
| chr8 | 11104439 | 11106481 | 2043  | 0.01 | C_unshiu_00963 | 1651   | 3700   | 2050  | 1.86  | 98    |
| chr8 | 11106481 | 11118371 | 11891 | 0.05 | C_unshiu_00963 | 6391   | 18282  | 11892 | 10.77 | 99.84 |
| chr8 | 11118372 | 11123211 | 4840  | 0.02 | C_unshiu_01773 | 21305  | 16466  | 4840  | 9.78  | 100   |
| chr8 | 11123205 | 11138161 | 14957 | 0.06 | C_unshiu_00963 | 22266  | 37222  | 14957 | 13.55 | 99.43 |
| chr8 | 11150989 | 11159790 | 8802  | 0.04 | C_unshiu_00963 | 50026  | 58848  | 8823  | 7.99  | 98.81 |
| chr8 | 11151015 | 11160476 | 9462  | 0.04 | C_unshiu_02845 | 453    | 9947   | 9495  | 56.69 | 98.68 |
| chr8 | 11161859 | 11165934 | 4076  | 0.02 | C_unshiu_00963 | 60166  | 64244  | 4079  | 3.69  | 99.63 |
| chr8 | 11179772 | 11189586 | 9815  | 0.04 | C_unshiu_00963 | 76482  | 86352  | 9871  | 8.94  | 98.12 |
| chr8 | 11189586 | 11192931 | 3346  | 0.01 | C_unshiu_00963 | 86455  | 89807  | 3353  | 3.04  | 98.16 |
| chr8 | 11194024 | 11196880 | 2857  | 0.01 | C_unshiu_00418 | 213655 | 210799 | 2857  | 1.3   | 100   |
| chr8 | 11217763 | 11239179 | 21417 | 0.09 | C_unshiu_00418 | 198728 | 177276 | 21453 | 9.78  | 98.51 |
| chr8 | 11253382 | 11258343 | 4962  | 0.02 | C_unshiu_00418 | 162134 | 157167 | 4968  | 2.26  | 98.41 |
| chr8 | 11277104 | 11293272 | 16169 | 0.07 | C_unshiu_00418 | 143466 | 127322 | 16145 | 7.36  | 99.42 |
| chr8 | 11306520 | 11311609 | 5090  | 0.02 | C_unshiu_02677 | 20     | 5134   | 5115  | 25.12 | 98.26 |
| chr8 | 11311612 | 11318931 | 7320  | 0.03 | C_unshiu_00418 | 109632 | 102314 | 7319  | 3.34  | 98.8  |
| chr8 | 11319125 | 11321685 | 2561  | 0.01 | C_unshiu_00418 | 102280 | 99735  | 2546  | 1.16  | 98.63 |
| chr8 | 11332334 | 11336205 | 3872  | 0.02 | C_unshiu_01741 | 50092  | 46217  | 3876  | 7.59  | 99.02 |
| chr8 | 11338920 | 11348336 | 9417  | 0.04 | C_unshiu_01741 | 44885  | 35491  | 9395  | 18.4  | 99.77 |
| chr8 | 11348621 | 11351058 | 2438  | 0.01 | C_unshiu_01741 | 34734  | 32297  | 2438  | 4.78  | 100   |
| chr8 | 11351544 | 11352562 | 1019  | 0    | C_unshiu_02884 | 12114  | 11096  | 1019  | 6.32  | 99.41 |
| chr8 | 11352578 | 11355236 | 2659  | 0.01 | C_unshiu_02884 | 10544  | 7885   | 2660  | 16.51 | 99.36 |
| chr8 | 11354533 | 11383311 | 28779 | 0.12 | C_unshiu_01741 | 28819  | 1      | 28819 | 56.45 | 99.46 |
| chr8 | 11389210 | 11391072 | 1863  | 0.01 | C_unshiu_00211 | 230959 | 232821 | 1863  | 0.57  | 98.98 |
| chr8 | 11389552 | 11397442 | 7891  | 0.03 | C_unshiu_02884 | 7885   | 1      | 7885  | 48.94 | 99.72 |
| chr8 | 11398959 | 11407261 | 8303  | 0.04 | C_unshiu_00080 | 2569   | 10909  | 8341  | 1.69  | 98.41 |

|      |          |          |       |      |                |        |        |       |       |       |
|------|----------|----------|-------|------|----------------|--------|--------|-------|-------|-------|
| chr8 | 11410705 | 11418105 | 7401  | 0.03 | C_unshiu_02613 | 1      | 7454   | 7454  | 34.2  | 98.02 |
| chr8 | 11421042 | 11422187 | 1146  | 0    | C_unshiu_00080 | 17813  | 18958  | 1146  | 0.23  | 99.83 |
| chr8 | 11422713 | 11424385 | 1673  | 0.01 | C_unshiu_00080 | 23113  | 24785  | 1673  | 0.34  | 100   |
| chr8 | 11426347 | 11427363 | 1017  | 0    | C_unshiu_00080 | 26018  | 27034  | 1017  | 0.21  | 99.31 |
| chr8 | 11433304 | 11439032 | 5729  | 0.02 | C_unshiu_00080 | 30569  | 36287  | 5719  | 1.16  | 98.33 |
| chr8 | 11459627 | 11459809 | 1183  | 0.01 | C_unshiu_00244 | 121424 | 122606 | 1183  | 0.39  | 100   |
| chr8 | 11465081 | 11466679 | 1599  | 0.01 | C_unshiu_00280 | 188724 | 187126 | 1599  | 0.58  | 100   |
| chr8 | 11465382 | 11466696 | 1315  | 0.01 | C_unshiu_00085 | 429740 | 428425 | 1316  | 0.28  | 99.85 |
| chr8 | 11478841 | 11480507 | 1667  | 0.01 | C_unshiu_01356 | 13360  | 11694  | 1667  | 2.26  | 100   |
| chr8 | 11480601 | 11488275 | 7675  | 0.03 | C_unshiu_01356 | 11565  | 3886   | 7680  | 10.41 | 98.52 |
| chr8 | 11490165 | 11491295 | 1131  | 0    | C_unshiu_00988 | 83551  | 84681  | 1131  | 1.05  | 100   |
| chr8 | 11516926 | 11537528 | 20603 | 0.09 | C_unshiu_00767 | 23691  | 44152  | 20462 | 15.34 | 98.63 |
| chr8 | 11541253 | 11549098 | 7846  | 0.03 | C_unshiu_00466 | 178787 | 170928 | 7860  | 3.87  | 99.49 |
| chr8 | 11555145 | 11559623 | 4479  | 0.02 | C_unshiu_00466 | 168674 | 164193 | 4482  | 2.21  | 99.22 |
| chr8 | 11569474 | 11580927 | 11454 | 0.05 | C_unshiu_00466 | 157509 | 146036 | 11474 | 5.65  | 98.58 |
| chr8 | 11608622 | 11619850 | 11229 | 0.05 | C_unshiu_00466 | 119170 | 107944 | 11227 | 5.53  | 99.15 |
| chr8 | 11615689 | 11622385 | 6697  | 0.03 | C_unshiu_00226 | 311230 | 304540 | 6691  | 2.15  | 99.1  |
| chr8 | 11619866 | 11623229 | 3364  | 0.01 | C_unshiu_00466 | 108285 | 104916 | 3370  | 1.66  | 98.14 |
| chr8 | 11623215 | 11632677 | 9463  | 0.04 | C_unshiu_00466 | 104701 | 95253  | 9449  | 4.66  | 98.22 |
| chr8 | 11641526 | 11657593 | 16068 | 0.07 | C_unshiu_01750 | 7      | 16076  | 16070 | 31.79 | 98.85 |
| chr8 | 11657694 | 11659501 | 1808  | 0.01 | C_unshiu_03061 | 277    | 2087   | 1811  | 16.49 | 98.73 |
| chr8 | 11663355 | 11665531 | 2177  | 0.01 | C_unshiu_00595 | 12854  | 15032  | 2179  | 1.29  | 98.85 |
| chr8 | 11666299 | 11668290 | 1992  | 0.01 | C_unshiu_01265 | 3429   | 5423   | 1995  | 2.5   | 99.6  |
| chr8 | 11668290 | 11670755 | 2466  | 0.01 | C_unshiu_00595 | 16509  | 18976  | 2468  | 1.46  | 98.91 |
| chr8 | 11670866 | 11724639 | 53774 | 0.23 | C_unshiu_00595 | 19396  | 73196  | 53801 | 31.89 | 99.32 |
| chr8 | 11724723 | 11764986 | 40264 | 0.17 | C_unshiu_00595 | 73315  | 113727 | 40413 | 23.96 | 98.62 |
| chr8 | 11764988 | 11773905 | 8918  | 0.04 | C_unshiu_00595 | 114144 | 123069 | 8926  | 5.29  | 99.51 |
| chr8 | 11778806 | 11781761 | 2956  | 0.01 | C_unshiu_00357 | 191259 | 194214 | 2956  | 1.25  | 100   |
| chr8 | 11781753 | 11791518 | 9766  | 0.04 | C_unshiu_00998 | 72422  | 62619  | 9804  | 9.21  | 99.38 |
| chr8 | 11791517 | 11799066 | 7550  | 0.03 | C_unshiu_00998 | 62566  | 55044  | 7523  | 7.07  | 99.17 |
| chr8 | 11799079 | 11812577 | 13499 | 0.06 | C_unshiu_00998 | 52951  | 39435  | 13517 | 12.7  | 99.64 |
| chr8 | 11818783 | 11834264 | 15482 | 0.07 | C_unshiu_00998 | 40739  | 25191  | 15549 | 14.61 | 99.07 |
| chr8 | 11834276 | 11859208 | 24933 | 0.11 | C_unshiu_00998 | 24885  | 1      | 24885 | 23.38 | 99.27 |
| chr8 | 11860038 | 11866593 | 6556  | 0.03 | C_unshiu_00911 | 18202  | 24763  | 6562  | 5.66  | 98.12 |
| chr8 | 11867206 | 11868790 | 1585  | 0.01 | C_unshiu_00911 | 25125  | 26719  | 1595  | 1.38  | 98.18 |
| chr8 | 11868790 | 11884228 | 15439 | 0.07 | C_unshiu_00911 | 27013  | 42543  | 15531 | 13.4  | 99.02 |
| chr8 | 11889056 | 11890277 | 1222  | 0.01 | C_unshiu_00911 | 46510  | 47732  | 1223  | 1.06  | 99.67 |
| chr8 | 11890500 | 11893333 | 2834  | 0.01 | C_unshiu_00911 | 48000  | 50834  | 2835  | 2.45  | 99.93 |
| chr8 | 11918659 | 11920480 | 1822  | 0.01 | C_unshiu_01352 | 67171  | 65350  | 1822  | 2.47  | 99.67 |
| chr8 | 11921860 | 11924397 | 2538  | 0.01 | C_unshiu_01352 | 64989  | 62454  | 2536  | 3.43  | 99.84 |
| chr8 | 11929302 | 11931068 | 1767  | 0.01 | C_unshiu_01352 | 58000  | 56238  | 1763  | 2.39  | 99.77 |
| chr8 | 11938177 | 11940153 | 1977  | 0.01 | C_unshiu_01352 | 31679  | 33655  | 1977  | 2.68  | 100   |
| chr8 | 11940148 | 11948722 | 8575  | 0.04 | C_unshiu_01352 | 48205  | 39629  | 8577  | 11.61 | 99.84 |
| chr8 | 11949511 | 11952798 | 3288  | 0.01 | C_unshiu_01352 | 38421  | 35121  | 3301  | 4.47  | 99.15 |
| chr8 | 11952801 | 11953850 | 1050  | 0    | C_unshiu_01352 | 34699  | 33650  | 1050  | 1.42  | 99.62 |
| chr8 | 11958837 | 11961397 | 2561  | 0.01 | C_unshiu_00911 | 102991 | 100431 | 2561  | 2.21  | 100   |
| chr8 | 11961689 | 11963671 | 1983  | 0.01 | C_unshiu_00911 | 99972  | 97990  | 1983  | 1.71  | 100   |
| chr8 | 11969245 | 11979237 | 9993  | 0.04 | C_unshiu_00911 | 92661  | 82673  | 9989  | 8.62  | 99.65 |
| chr8 | 11979237 | 11980316 | 1080  | 0    | C_unshiu_01104 | 66311  | 67390  | 1080  | 1.13  | 100   |
| chr8 | 11985375 | 12003723 | 18349 | 0.08 | C_unshiu_00911 | 75081  | 56740  | 18342 | 15.83 | 99.14 |
| chr8 | 12009445 | 12010544 | 1100  | 0    | C_unshiu_01709 | 24457  | 25556  | 1100  | 2.11  | 99.73 |
| chr8 | 12010545 | 12015744 | 5200  | 0.02 | C_unshiu_01709 | 25491  | 30691  | 5201  | 9.98  | 99.52 |
| chr8 | 12015757 | 12017316 | 1560  | 0.01 | C_unshiu_01709 | 1890   | 3449   | 1560  | 2.99  | 99.81 |
| chr8 | 12019305 | 12021547 | 2243  | 0.01 | C_unshiu_01709 | 30840  | 33082  | 2243  | 4.3   | 99.91 |
| chr8 | 12021564 | 12023306 | 1743  | 0.01 | C_unshiu_01709 | 34081  | 35840  | 1760  | 3.38  | 98.81 |
| chr8 | 12023306 | 12024308 | 1003  | 0    | C_unshiu_01352 | 50439  | 51438  | 1000  | 1.35  | 99    |
| chr8 | 12029175 | 12030952 | 1778  | 0.01 | C_unshiu_01709 | 3466   | 5243   | 1778  | 3.41  | 99.72 |
| chr8 | 12032406 | 12033703 | 1298  | 0.01 | C_unshiu_01709 | 5098   | 6395   | 1298  | 2.49  | 99.31 |
| chr8 | 12033699 | 12034767 | 1069  | 0    | C_unshiu_01709 | 12185  | 13253  | 1069  | 2.05  | 99.72 |
| chr8 | 12034868 | 12037448 | 2581  | 0.01 | C_unshiu_01746 | 22590  | 20013  | 2578  | 5.09  | 98.03 |
| chr8 | 12049864 | 12055549 | 5686  | 0.02 | C_unshiu_01746 | 7305   | 1621   | 5685  | 11.21 | 99.37 |
| chr8 | 12054872 | 12055900 | 1029  | 0    | C_unshiu_00900 | 99065  | 98035  | 1031  | 0.88  | 98.64 |
| chr8 | 12071920 | 12084671 | 12752 | 0.05 | C_unshiu_00329 | 136635 | 149335 | 12701 | 5.03  | 98.83 |
| chr8 | 12096244 | 12109307 | 13064 | 0.06 | C_unshiu_00329 | 155728 | 168766 | 13039 | 5.16  | 99.03 |
| chr8 | 12115684 | 12121756 | 6073  | 0.03 | C_unshiu_00329 | 174412 | 180509 | 6098  | 2.42  | 98.32 |
| chr8 | 12121749 | 12128786 | 7038  | 0.03 | C_unshiu_00329 | 181207 | 188254 | 7048  | 2.79  | 98.9  |
| chr8 | 12128780 | 12131103 | 2324  | 0.01 | C_unshiu_00329 | 188633 | 190957 | 2325  | 0.92  | 99.18 |
| chr8 | 12153684 | 12159973 | 6290  | 0.03 | C_unshiu_00204 | 296897 | 303189 | 6293  | 1.89  | 99.63 |
| chr8 | 12164097 | 12165282 | 1186  | 0.01 | C_unshiu_00204 | 305898 | 307083 | 1186  | 0.36  | 99.24 |
| chr8 | 12165596 | 12170092 | 4497  | 0.02 | C_unshiu_00204 | 307309 | 311804 | 4496  | 1.35  | 99.8  |
| chr8 | 12171435 | 12180307 | 8873  | 0.04 | C_unshiu_00204 | 313628 | 322523 | 8896  | 2.67  | 99.46 |
| chr8 | 12183027 | 12184028 | 1002  | 0    | C_unshiu_00204 | 326117 | 327119 | 1003  | 0.3   | 99.2  |
| chr8 | 12184317 | 12185632 | 1316  | 0.01 | C_unshiu_00204 | 325176 | 326492 | 1317  | 0.4   | 99.54 |
| chr8 | 12194589 | 12220420 | 25832 | 0.11 | C_unshiu_01289 | 9557   | 35412  | 25856 | 33.04 | 99.01 |
| chr8 | 12229776 | 12231825 | 2050  | 0.01 | C_unshiu_02239 | 7453   | 5403   | 2051  | 6.4   | 99.76 |
| chr8 | 12232160 | 12233477 | 1318  | 0.01 | C_unshiu_02239 | 3766   | 2449   | 1318  | 4.11  | 100   |
| chr8 | 12234915 | 12236839 | 1925  | 0.01 | C_unshiu_02239 | 5618   | 3694   | 1925  | 6.01  | 99.07 |
| chr8 | 12236850 | 12238350 | 1501  | 0.01 | C_unshiu_01289 | 45309  | 46810  | 1502  | 1.92  | 99.93 |
| chr8 | 12246419 | 12248556 | 2138  | 0.01 | C_unshiu_01289 | 51244  | 53377  | 2134  | 2.73  | 98.92 |

|      |          |          |        |      |                |        |        |        |       |       |
|------|----------|----------|--------|------|----------------|--------|--------|--------|-------|-------|
| chr8 | 12249403 | 12265877 | 16475  | 0.07 | C_unshiu_01289 | 54792  | 71295  | 16504  | 21.09 | 98.42 |
| chr8 | 12262464 | 12272329 | 9866   | 0.04 | C_unshiu_01458 | 1      | 9869   | 9869   | 14.96 | 98.81 |
| chr8 | 12270862 | 12275736 | 4875   | 0.02 | C_unshiu_01289 | 73369  | 78250  | 4882   | 6.24  | 98.47 |
| chr8 | 12275144 | 12281730 | 6587   | 0.03 | C_unshiu_01458 | 15025  | 21635  | 6611   | 10.02 | 98.39 |
| chr8 | 12281904 | 12295032 | 13129  | 0.06 | C_unshiu_01458 | 22578  | 35680  | 13103  | 19.86 | 98.18 |
| chr8 | 12299962 | 12321482 | 21521  | 0.09 | C_unshiu_01458 | 35527  | 57105  | 21579  | 32.7  | 98.74 |
| chr8 | 12322937 | 12324245 | 1309   | 0.01 | C_unshiu_01821 | 36731  | 35423  | 1309   | 2.74  | 100   |
| chr8 | 12324240 | 12332678 | 8439   | 0.04 | C_unshiu_01738 | 10245  | 18675  | 8431   | 16.49 | 99.79 |
| chr8 | 12333734 | 12345725 | 11992  | 0.05 | C_unshiu_01738 | 19845  | 31891  | 12047  | 23.57 | 99.24 |
| chr8 | 12354856 | 12389441 | 34586  | 0.15 | C_unshiu_00071 | 133247 | 167833 | 34587  | 6.62  | 99.97 |
| chr8 | 12393662 | 12555907 | 162246 | 0.69 | C_unshiu_00071 | 172159 | 334465 | 162307 | 31.07 | 99.91 |
| chr8 | 12557489 | 12558840 | 1352   | 0.01 | C_unshiu_00016 | 665628 | 666979 | 1352   | 0.15  | 99.26 |
| chr8 | 12559890 | 12603569 | 43680  | 0.18 | C_unshiu_00071 | 339034 | 382779 | 43746  | 8.37  | 99.72 |
| chr8 | 12603693 | 12629089 | 25397  | 0.11 | C_unshiu_00071 | 383079 | 408500 | 25422  | 4.87  | 99.78 |
| chr8 | 12629698 | 12668558 | 38861  | 0.16 | C_unshiu_00071 | 409496 | 448355 | 38860  | 7.44  | 99.99 |
| chr8 | 12711117 | 12713257 | 2141   | 0.01 | C_unshiu_02490 | 24756  | 22620  | 2137   | 8.63  | 99.07 |
| chr8 | 12714425 | 12728064 | 13640  | 0.06 | C_unshiu_02490 | 22624  | 9131   | 13494  | 54.51 | 98.53 |
| chr8 | 12728299 | 12731807 | 3509   | 0.01 | C_unshiu_02490 | 8710   | 5199   | 3512   | 14.19 | 99.91 |
| chr8 | 12735361 | 12740355 | 4995   | 0.02 | C_unshiu_00091 | 72686  | 77680  | 4995   | 1.07  | 100   |
| chr8 | 12759060 | 12772307 | 13248  | 0.06 | C_unshiu_02991 | 13189  | 1      | 13189  | 100   | 99.02 |
| chr8 | 12778611 | 12783045 | 4435   | 0.02 | C_unshiu_02855 | 752    | 5193   | 4442   | 26.69 | 99.53 |
| chr8 | 12798327 | 12805416 | 7090   | 0.03 | C_unshiu_00945 | 88877  | 81746  | 7132   | 6.37  | 98.03 |
| chr8 | 12807968 | 12814513 | 6546   | 0.03 | C_unshiu_00945 | 81751  | 75111  | 6641   | 5.93  | 98.12 |
| chr8 | 12815461 | 12817085 | 1625   | 0.01 | C_unshiu_00945 | 73544  | 71913  | 1632   | 1.46  | 98.1  |
| chr8 | 12823578 | 12831002 | 7425   | 0.03 | C_unshiu_00945 | 60528  | 53077  | 7452   | 6.66  | 98.77 |
| chr8 | 12833947 | 12843986 | 10040  | 0.04 | C_unshiu_00945 | 51377  | 41286  | 10092  | 9.02  | 98.68 |
| chr8 | 12880220 | 12889595 | 9376   | 0.04 | C_unshiu_01557 | 26207  | 16755  | 9453   | 15.75 | 98.41 |
| chr8 | 12889945 | 12893565 | 3621   | 0.02 | C_unshiu_01069 | 98817  | 95172  | 3646   | 3.69  | 98.08 |
| chr8 | 12893396 | 12897971 | 4576   | 0.02 | C_unshiu_01069 | 95152  | 90569  | 4584   | 4.64  | 98.3  |
| chr8 | 12920769 | 12923288 | 2520   | 0.01 | C_unshiu_01069 | 77556  | 75070  | 2487   | 2.52  | 98.57 |
| chr8 | 12926893 | 12931256 | 4364   | 0.02 | C_unshiu_01069 | 72709  | 68346  | 4364   | 4.42  | 99.43 |
| chr8 | 12931481 | 12934314 | 2834   | 0.01 | C_unshiu_01069 | 67688  | 64850  | 2839   | 2.87  | 99.33 |
| chr8 | 12934613 | 12938132 | 3520   | 0.01 | C_unshiu_02174 | 34205  | 30688  | 3518   | 10.29 | 99.43 |
| chr8 | 12938123 | 12943315 | 5193   | 0.02 | C_unshiu_01069 | 62186  | 56999  | 5188   | 5.25  | 99.48 |
| chr8 | 12943743 | 12950512 | 6770   | 0.03 | C_unshiu_01069 | 56014  | 49252  | 6763   | 6.84  | 99.45 |
| chr8 | 12950538 | 12968603 | 18066  | 0.08 | C_unshiu_00491 | 77632  | 59728  | 17905  | 9.14  | 98.74 |
| chr8 | 12975271 | 12976342 | 1072   | 0    | C_unshiu_00491 | 51196  | 50129  | 1068   | 0.55  | 98.32 |
| chr8 | 12976633 | 13013731 | 37099  | 0.16 | C_unshiu_00491 | 49526  | 12441  | 37086  | 18.93 | 99.54 |
| chr8 | 13015739 | 13032491 | 16753  | 0.07 | C_unshiu_01176 | 84659  | 67963  | 16697  | 19    | 98.12 |
| chr8 | 13025467 | 13040615 | 15149  | 0.06 | C_unshiu_02187 | 33125  | 17944  | 15182  | 44.98 | 99.08 |
| chr8 | 13041009 | 13045633 | 4625   | 0.02 | C_unshiu_02187 | 17121  | 12498  | 4624   | 13.7  | 99.98 |
| chr8 | 13047772 | 13053701 | 5930   | 0.03 | C_unshiu_02187 | 9479   | 3568   | 5912   | 17.51 | 98.79 |
| chr8 | 13054183 | 13055918 | 1736   | 0.01 | C_unshiu_02187 | 2722   | 985    | 1738   | 5.15  | 99.31 |
| chr8 | 13058217 | 13066193 | 7977   | 0.03 | C_unshiu_01176 | 25680  | 17699  | 7982   | 9.08  | 99.74 |
| chr8 | 13069822 | 13089355 | 19534  | 0.08 | C_unshiu_01852 | 16014  | 35500  | 19487  | 41.96 | 98.07 |
| chr8 | 13092945 | 13103941 | 10997  | 0.05 | C_unshiu_01852 | 35501  | 46443  | 10943  | 23.56 | 98.62 |
| chr8 | 13100962 | 13109841 | 8880   | 0.04 | C_unshiu_00926 | 113091 | 104161 | 8931   | 7.82  | 98.38 |
| chr8 | 13144675 | 13185313 | 40639  | 0.17 | C_unshiu_00512 | 1      | 40710  | 40710  | 21.7  | 98.74 |
| chr8 | 13204092 | 13215982 | 11891  | 0.05 | C_unshiu_00512 | 58648  | 70545  | 11898  | 6.34  | 99.57 |
| chr8 | 13232165 | 13235159 | 2995   | 0.01 | C_unshiu_02063 | 23341  | 20348  | 2994   | 7.83  | 98.87 |
| chr8 | 13232250 | 13235164 | 2915   | 0.01 | C_unshiu_00512 | 86598  | 89514  | 2917   | 1.56  | 99.25 |
| chr8 | 13236344 | 13240172 | 3829   | 0.02 | C_unshiu_00512 | 91208  | 95029  | 3822   | 2.04  | 98.83 |
| chr8 | 13240666 | 13241924 | 1259   | 0.01 | C_unshiu_02063 | 15260  | 14002  | 1259   | 3.29  | 100   |
| chr8 | 13244916 | 13246319 | 1404   | 0.01 | C_unshiu_02063 | 12223  | 10820  | 1404   | 3.67  | 100   |
| chr8 | 13246879 | 13249882 | 3004   | 0.01 | C_unshiu_01828 | 47441  | 44439  | 3003   | 6.33  | 98.5  |
| chr8 | 13250401 | 13252740 | 2340   | 0.01 | C_unshiu_00512 | 97202  | 99541  | 2340   | 1.25  | 99.96 |
| chr8 | 13285533 | 13310993 | 25461  | 0.11 | C_unshiu_00952 | 27182  | 52637  | 25456  | 22.88 | 98.82 |
| chr8 | 13331161 | 13335898 | 4738   | 0.02 | C_unshiu_00952 | 66398  | 71134  | 4737   | 4.26  | 98.59 |
| chr8 | 13335441 | 13347314 | 11874  | 0.05 | C_unshiu_00952 | 72278  | 84180  | 11903  | 10.7  | 98.37 |
| chr8 | 13357844 | 13364634 | 6791   | 0.03 | C_unshiu_00952 | 92376  | 99086  | 6711   | 6.03  | 98.4  |
| chr8 | 13369326 | 13374726 | 5401   | 0.02 | C_unshiu_00952 | 100702 | 106103 | 5402   | 4.85  | 98.34 |
| chr8 | 13377218 | 13380535 | 3318   | 0.01 | C_unshiu_00952 | 107367 | 110714 | 3348   | 3.01  | 98.51 |
| chr8 | 13390435 | 13394301 | 3867   | 0.02 | C_unshiu_00354 | 194630 | 198509 | 3880   | 1.62  | 99.05 |
| chr8 | 13401566 | 13403657 | 2092   | 0.01 | C_unshiu_00741 | 105469 | 107560 | 2092   | 1.52  | 99.81 |
| chr8 | 13403903 | 13430965 | 27063  | 0.11 | C_unshiu_00354 | 211967 | 238932 | 26966  | 11.29 | 99.18 |
| chr8 | 13434071 | 13439016 | 4946   | 0.02 | C_unshiu_02459 | 16996  | 12035  | 4962   | 19.19 | 98.53 |
| chr8 | 13441630 | 13445522 | 3893   | 0.02 | C_unshiu_02459 | 8708   | 4823   | 3886   | 15.03 | 99.44 |
| chr8 | 13447385 | 13455749 | 8365   | 0.04 | C_unshiu_02669 | 11733  | 3318   | 8416   | 40.96 | 98.23 |
| chr8 | 13455749 | 13461164 | 5416   | 0.02 | C_unshiu_00603 | 2858   | 8297   | 5440   | 3.25  | 98.79 |
| chr8 | 13478393 | 13482572 | 4180   | 0.02 | C_unshiu_00603 | 30096  | 34307  | 4212   | 2.52  | 98.74 |
| chr8 | 13492545 | 13514284 | 21740  | 0.09 | C_unshiu_00603 | 43466  | 65186  | 21721  | 12.99 | 99.79 |
| chr8 | 13559976 | 13583786 | 23811  | 0.1  | C_unshiu_00603 | 106383 | 130234 | 23852  | 14.27 | 99.49 |
| chr8 | 13583797 | 13587124 | 3328   | 0.01 | C_unshiu_00603 | 130172 | 133497 | 3326   | 1.99  | 99.04 |
| chr8 | 13587573 | 13589418 | 1846   | 0.01 | C_unshiu_00603 | 133320 | 135173 | 1854   | 1.11  | 98.65 |
| chr8 | 13589592 | 13592162 | 2571   | 0.01 | C_unshiu_00603 | 135175 | 137746 | 2572   | 1.54  | 99.22 |
| chr8 | 13624942 | 13629529 | 4588   | 0.02 | C_unshiu_01998 | 9408   | 4832   | 4577   | 11.25 | 99.22 |
| chr8 | 13628305 | 13631915 | 3611   | 0.02 | C_unshiu_00294 | 3605   | 7215   | 3611   | 1.34  | 99.34 |
| chr8 | 13635335 | 13637433 | 2099   | 0.01 | C_unshiu_00294 | 10567  | 12666  | 2100   | 0.78  | 99.52 |
| chr8 | 13644485 | 13664311 | 19827  | 0.08 | C_unshiu_01945 | 35714  | 15928  | 19787  | 46.06 | 99.12 |

|      |          |          |       |      |                |        |        |       |       |       |
|------|----------|----------|-------|------|----------------|--------|--------|-------|-------|-------|
| chr8 | 13663647 | 13664769 | 1123  | 0    | C_unshiu_00355 | 47648  | 48769  | 1122  | 0.47  | 99.64 |
| chr8 | 13671267 | 13674950 | 3684  | 0.02 | C_unshiu_00294 | 16484  | 12810  | 3675  | 1.36  | 98.11 |
| chr8 | 13682823 | 13686272 | 3450  | 0.01 | C_unshiu_00294 | 10643  | 7191   | 3453  | 1.28  | 98.78 |
| chr8 | 13687806 | 13689187 | 1382  | 0.01 | C_unshiu_01132 | 65622  | 64237  | 1386  | 1.5   | 98.05 |
| chr8 | 13692339 | 13695051 | 2713  | 0.01 | C_unshiu_00747 | 74564  | 71865  | 2700  | 1.98  | 98.2  |
| chr8 | 13706688 | 13709087 | 2400  | 0.01 | C_unshiu_00108 | 19127  | 16728  | 2400  | 0.54  | 98.33 |
| chr8 | 13710881 | 13729145 | 18265 | 0.08 | C_unshiu_01093 | 14799  | 33025  | 18227 | 18.88 | 98.85 |
| chr8 | 13729236 | 13736183 | 6948  | 0.03 | C_unshiu_01093 | 33142  | 40081  | 6940  | 7.19  | 99.38 |
| chr8 | 13738326 | 13739618 | 1293  | 0.01 | C_unshiu_01093 | 43076  | 44379  | 1304  | 1.35  | 98.77 |
| chr8 | 13740943 | 13747219 | 6277  | 0.03 | C_unshiu_01093 | 46165  | 52463  | 6299  | 6.52  | 98.62 |
| chr8 | 13747211 | 13749539 | 2329  | 0.01 | C_unshiu_01093 | 53479  | 55809  | 2331  | 2.41  | 98.71 |
| chr8 | 13747710 | 13750626 | 2917  | 0.01 | C_unshiu_01093 | 91735  | 88805  | 2931  | 3.04  | 98.4  |
| chr8 | 13752439 | 13754744 | 2306  | 0.01 | C_unshiu_01093 | 84227  | 81923  | 2305  | 2.39  | 99.83 |
| chr8 | 13755094 | 13758726 | 3633  | 0.02 | C_unshiu_01093 | 68508  | 72148  | 3641  | 3.77  | 98.41 |
| chr8 | 13756120 | 13758726 | 2607  | 0.01 | C_unshiu_01647 | 54425  | 51811  | 2615  | 4.73  | 98.09 |
| chr8 | 13761986 | 13770438 | 8453  | 0.04 | C_unshiu_01647 | 48047  | 39606  | 8442  | 15.27 | 99.2  |
| chr8 | 13773474 | 13790025 | 16552 | 0.07 | C_unshiu_01647 | 39583  | 23014  | 16570 | 29.98 | 99.19 |
| chr8 | 13795441 | 13798928 | 3488  | 0.01 | C_unshiu_01073 | 41     | 3530   | 3490  | 3.54  | 98.8  |
| chr8 | 13799848 | 13805097 | 5250  | 0.02 | C_unshiu_01647 | 12858  | 7604   | 5255  | 9.51  | 98.73 |
| chr8 | 13811181 | 13812522 | 1342  | 0.01 | C_unshiu_01073 | 18526  | 19870  | 1345  | 1.36  | 99.03 |
| chr8 | 13814459 | 13816488 | 2030  | 0.01 | C_unshiu_01073 | 22402  | 24444  | 2043  | 2.07  | 98.83 |
| chr8 | 13822031 | 13826392 | 4362  | 0.02 | C_unshiu_01073 | 26800  | 31183  | 4384  | 4.45  | 98.52 |
| chr8 | 13826384 | 13829283 | 2900  | 0.01 | C_unshiu_01073 | 31386  | 34292  | 2907  | 2.95  | 99.28 |
| chr8 | 13837869 | 13846199 | 8331  | 0.04 | C_unshiu_01073 | 43785  | 52075  | 8291  | 8.41  | 98.65 |
| chr8 | 13847520 | 13866257 | 18738 | 0.08 | C_unshiu_01073 | 52190  | 70965  | 18776 | 19.05 | 98.26 |
| chr8 | 13866865 | 13868192 | 1328  | 0.01 | C_unshiu_00998 | 82620  | 81293  | 1328  | 1.25  | 98.87 |
| chr8 | 13870639 | 13872588 | 1950  | 0.01 | C_unshiu_00998 | 79621  | 77666  | 1956  | 1.84  | 98.88 |
| chr8 | 13873118 | 13877319 | 4202  | 0.02 | C_unshiu_00998 | 77956  | 73751  | 4206  | 3.95  | 98.36 |
| chr8 | 13878509 | 13881155 | 2647  | 0.01 | C_unshiu_00413 | 7288   | 9935   | 2648  | 1.2   | 98.3  |
| chr8 | 13885227 | 13887253 | 2027  | 0.01 | C_unshiu_00055 | 216760 | 218786 | 2027  | 0.34  | 100   |
| chr8 | 13891580 | 13894286 | 2707  | 0.01 | C_unshiu_00413 | 18749  | 21457  | 2709  | 1.23  | 98.93 |
| chr8 | 13896094 | 13901548 | 5455  | 0.02 | C_unshiu_00413 | 22076  | 27530  | 5455  | 2.47  | 99.98 |
| chr8 | 13906531 | 13907976 | 1446  | 0.01 | C_unshiu_00640 | 124374 | 122927 | 1448  | 0.91  | 99.65 |
| chr8 | 13918337 | 13920959 | 2623  | 0.01 | C_unshiu_00460 | 93736  | 91114  | 2623  | 1.28  | 98.7  |
| chr8 | 13922632 | 13924378 | 1747  | 0.01 | C_unshiu_00460 | 89308  | 87562  | 1747  | 0.85  | 99.89 |
| chr8 | 13947128 | 13948947 | 1820  | 0.01 | C_unshiu_02732 | 2609   | 781    | 1829  | 9.48  | 98.63 |
| chr8 | 13953973 | 13977012 | 23040 | 0.1  | C_unshiu_01629 | 1      | 23108  | 23108 | 41.22 | 99.16 |
| chr8 | 13978712 | 14000564 | 21853 | 0.09 | C_unshiu_01629 | 25616  | 47328  | 21713 | 38.73 | 98.52 |
| chr8 | 13994602 | 14002894 | 8293  | 0.04 | C_unshiu_02021 | 18149  | 26471  | 8323  | 20.91 | 98.31 |
| chr8 | 14002912 | 14008084 | 5173  | 0.02 | C_unshiu_02021 | 26707  | 31862  | 5156  | 12.96 | 98.04 |
| chr8 | 14024491 | 14036596 | 12106 | 0.05 | C_unshiu_01990 | 10523  | 22637  | 12115 | 29.62 | 99.62 |
| chr8 | 14052167 | 14053926 | 1760  | 0.01 | C_unshiu_01990 | 32117  | 33875  | 1759  | 4.3   | 98.92 |
| chr8 | 14053820 | 14057764 | 3945  | 0.02 | C_unshiu_01990 | 33872  | 37816  | 3945  | 9.64  | 98.86 |
| chr8 | 14057945 | 14060046 | 2102  | 0.01 | C_unshiu_01990 | 38397  | 40504  | 2108  | 5.15  | 98.67 |
| chr8 | 14087278 | 14109430 | 22153 | 0.09 | C_unshiu_01295 | 47167  | 25039  | 22129 | 28.47 | 99.05 |
| chr8 | 14118925 | 14123404 | 4480  | 0.02 | C_unshiu_01421 | 69386  | 64894  | 4493  | 6.48  | 99.51 |
| chr8 | 14123424 | 14125282 | 1859  | 0.01 | C_unshiu_01421 | 64756  | 62896  | 1861  | 2.68  | 99.79 |
| chr8 | 14125591 | 14131909 | 6319  | 0.03 | C_unshiu_01421 | 60914  | 54579  | 6336  | 9.13  | 98.36 |
| chr8 | 14131971 | 14145996 | 14026 | 0.06 | C_unshiu_01295 | 14055  | 2      | 14054 | 18.08 | 99.06 |
| chr8 | 14137192 | 14170848 | 33657 | 0.14 | C_unshiu_01421 | 54424  | 20840  | 33585 | 48.4  | 98.99 |
| chr8 | 14170803 | 14174153 | 3351  | 0.01 | C_unshiu_01421 | 20793  | 17443  | 3351  | 4.83  | 99.43 |
| chr8 | 14173081 | 14197896 | 24816 | 0.1  | C_unshiu_00658 | 218    | 25033  | 24816 | 16.08 | 99.55 |
| chr8 | 14202412 | 14212435 | 10024 | 0.04 | C_unshiu_00658 | 24346  | 34359  | 10014 | 6.49  | 98.96 |
| chr8 | 14214650 | 14221041 | 6392  | 0.03 | C_unshiu_00658 | 37643  | 44051  | 6409  | 4.15  | 99    |
| chr8 | 14221768 | 14225285 | 3518  | 0.01 | C_unshiu_00658 | 45451  | 48943  | 3493  | 2.26  | 98.72 |
| chr8 | 14242537 | 14322115 | 79579 | 0.34 | C_unshiu_00035 | 563749 | 484160 | 79590 | 11.59 | 99.95 |
| chr8 | 14321792 | 14360026 | 38235 | 0.16 | C_unshiu_00035 | 484421 | 446188 | 38234 | 5.57  | 99.93 |
| chr8 | 14357131 | 14385467 | 28337 | 0.12 | C_unshiu_00035 | 437669 | 409412 | 28258 | 4.11  | 99.68 |
| chr8 | 14385389 | 14442171 | 56783 | 0.24 | C_unshiu_00035 | 409377 | 352599 | 56779 | 8.27  | 99.99 |
| chr8 | 14442172 | 14443369 | 1198  | 0.01 | C_unshiu_00035 | 351410 | 352603 | 1194  | 0.17  | 98.09 |
| chr8 | 14446953 | 14453937 | 6985  | 0.03 | C_unshiu_02033 | 1      | 6991   | 6991  | 17.72 | 99.67 |
| chr8 | 14460714 | 14494819 | 34106 | 0.14 | C_unshiu_00708 | 130009 | 95875  | 34135 | 23.89 | 99.09 |
| chr8 | 14495878 | 14507197 | 11320 | 0.05 | C_unshiu_02627 | 1      | 11320  | 11320 | 52.56 | 100   |
| chr8 | 14507343 | 14509741 | 2399  | 0.01 | C_unshiu_02627 | 11526  | 13924  | 2399  | 11.14 | 100   |
| chr8 | 14523049 | 14552284 | 29236 | 0.12 | C_unshiu_01072 | 37682  | 8465   | 29218 | 29.61 | 98.14 |
| chr8 | 14552628 | 14553814 | 1187  | 0.01 | C_unshiu_01072 | 7587   | 6401   | 1187  | 1.2   | 100   |
| chr8 | 14561344 | 14565265 | 3922  | 0.02 | C_unshiu_00151 | 225130 | 229051 | 3922  | 1.02  | 100   |
| chr8 | 14583095 | 14590427 | 7333  | 0.03 | C_unshiu_00626 | 141452 | 148795 | 7344  | 4.54  | 98.19 |
| chr8 | 14590424 | 14593047 | 2624  | 0.01 | C_unshiu_00626 | 148937 | 151573 | 2637  | 1.63  | 98.6  |
| chr8 | 14606492 | 14607545 | 1054  | 0    | C_unshiu_00030 | 267625 | 266572 | 1054  | 0.15  | 100   |
| chr8 | 14608171 | 14612347 | 4177  | 0.02 | C_unshiu_01801 | 9973   | 14152  | 4180  | 8.62  | 99.71 |
| chr8 | 14645775 | 14648777 | 3003  | 0.01 | C_unshiu_01801 | 18194  | 21184  | 2991  | 6.17  | 98.57 |
| chr8 | 14649646 | 14651094 | 1449  | 0.01 | C_unshiu_00030 | 228167 | 226729 | 1439  | 0.2   | 99.1  |
| chr8 | 14649714 | 14651100 | 1387  | 0.01 | C_unshiu_01801 | 22458  | 23844  | 1387  | 2.86  | 99.42 |
| chr8 | 14651126 | 14665402 | 14277 | 0.06 | C_unshiu_01801 | 24274  | 38550  | 14277 | 29.44 | 99.99 |
| chr8 | 14666134 | 14671542 | 5409  | 0.02 | C_unshiu_00030 | 218033 | 212613 | 5421  | 0.76  | 98.58 |
| chr8 | 14675126 | 14686451 | 11326 | 0.05 | C_unshiu_00907 | 1      | 11242  | 11242 | 9.66  | 98.84 |
| chr8 | 14694957 | 14696115 | 1159  | 0    | C_unshiu_00030 | 189262 | 188104 | 1159  | 0.16  | 99.91 |
| chr8 | 14697347 | 14698851 | 1505  | 0.01 | C_unshiu_00197 | 5273   | 3770   | 1504  | 0.45  | 99.34 |

|      |          |          |       |      |                |        |        |       |       |       |
|------|----------|----------|-------|------|----------------|--------|--------|-------|-------|-------|
| chr8 | 14703729 | 14705620 | 1892  | 0.01 | C_unshiu_00197 | 12337  | 14235  | 1899  | 0.56  | 99.16 |
| chr8 | 14706411 | 14720890 | 14480 | 0.06 | C_unshiu_00197 | 15352  | 29839  | 14488 | 4.29  | 99.7  |
| chr8 | 14725237 | 14733301 | 8065  | 0.03 | C_unshiu_01172 | 8074   | 1      | 8074  | 9.15  | 99.44 |
| chr8 | 14740876 | 14773364 | 32489 | 0.14 | C_unshiu_00197 | 32508  | 65038  | 32531 | 9.63  | 99.58 |
| chr8 | 14753390 | 14787478 | 34089 | 0.14 | C_unshiu_00197 | 45053  | 79208  | 34156 | 10.11 | 99.19 |
| chr8 | 14788210 | 14802594 | 14385 | 0.06 | C_unshiu_02815 | 17576  | 3236   | 14341 | 81.59 | 98.72 |
| chr8 | 14806380 | 14807485 | 1106  | 0    | C_unshiu_00197 | 100786 | 101876 | 1091  | 0.32  | 98.37 |
| chr8 | 14843151 | 14846262 | 3112  | 0.01 | C_unshiu_01590 | 43046  | 39910  | 3137  | 5.39  | 98.31 |
| chr8 | 14847253 | 14854560 | 7308  | 0.03 | C_unshiu_02172 | 1      | 7321   | 7321  | 21.35 | 98.25 |
| chr8 | 14855195 | 14856760 | 1566  | 0.01 | C_unshiu_01590 | 30484  | 28919  | 1566  | 2.69  | 99.68 |
| chr8 | 14868003 | 14869397 | 1395  | 0.01 | C_unshiu_00649 | 156882 | 155488 | 1395  | 0.89  | 98.93 |
| chr8 | 14869858 | 14877032 | 7175  | 0.03 | C_unshiu_02172 | 20873  | 28043  | 7171  | 20.92 | 99.68 |
| chr8 | 14877311 | 14880317 | 3007  | 0.01 | C_unshiu_02172 | 28677  | 31666  | 2990  | 8.72  | 98.54 |
| chr8 | 14879398 | 14882018 | 2621  | 0.01 | C_unshiu_00649 | 144430 | 141806 | 2625  | 1.67  | 98.14 |
| chr8 | 14882633 | 14892284 | 9652  | 0.04 | C_unshiu_00649 | 141270 | 131595 | 9676  | 6.17  | 98.5  |
| chr8 | 14896912 | 14906038 | 9127  | 0.04 | C_unshiu_00649 | 131603 | 122428 | 9176  | 5.85  | 98.24 |
| chr8 | 14902865 | 14906038 | 3174  | 0.01 | C_unshiu_01573 | 58971  | 55789  | 3183  | 5.4   | 98.62 |
| chr8 | 14907209 | 14923248 | 16040 | 0.07 | C_unshiu_01573 | 53720  | 37677  | 16044 | 27.21 | 99.42 |
| chr8 | 14922656 | 14927614 | 4959  | 0.02 | C_unshiu_01573 | 38030  | 33075  | 4956  | 8.4   | 99.15 |
| chr8 | 14928058 | 14931007 | 2950  | 0.01 | C_unshiu_01573 | 32325  | 29376  | 2950  | 5     | 99.76 |
| chr8 | 14930541 | 14944001 | 13461 | 0.06 | C_unshiu_00649 | 112782 | 99321  | 13462 | 8.58  | 99.94 |
| chr8 | 14950121 | 14958439 | 8319  | 0.04 | C_unshiu_00649 | 100959 | 92609  | 8351  | 5.32  | 98.63 |
| chr8 | 14961561 | 14978702 | 17142 | 0.07 | C_unshiu_00649 | 86143  | 68992  | 17152 | 10.93 | 98.95 |
| chr8 | 14978803 | 14980946 | 2144  | 0.01 | C_unshiu_00845 | 2434   | 4567   | 2134  | 1.73  | 98.46 |
| chr8 | 14979582 | 14980987 | 1406  | 0.01 | C_unshiu_01204 | 37879  | 39285  | 1407  | 1.65  | 98.93 |
| chr8 | 14980987 | 14982897 | 1911  | 0.01 | C_unshiu_00845 | 34440  | 36350  | 1911  | 1.55  | 100   |
| chr8 | 14986034 | 15007954 | 21921 | 0.09 | C_unshiu_00845 | 36968  | 58886  | 21919 | 17.81 | 98.5  |
| chr8 | 15007967 | 15011564 | 3598  | 0.02 | C_unshiu_00845 | 59291  | 62896  | 3606  | 2.93  | 99.45 |
| chr8 | 15037509 | 15045052 | 7544  | 0.03 | C_unshiu_00845 | 90017  | 97573  | 7557  | 6.14  | 99.01 |
| chr8 | 15065780 | 15067272 | 1493  | 0.01 | C_unshiu_00242 | 74035  | 75527  | 1493  | 0.5   | 100   |
| chr8 | 15068940 | 15080812 | 11873 | 0.05 | C_unshiu_00624 | 69448  | 81326  | 11879 | 7.33  | 99.44 |
| chr8 | 15080981 | 15085035 | 4055  | 0.02 | C_unshiu_00624 | 81851  | 85913  | 4063  | 2.51  | 99.21 |
| chr8 | 15111323 | 15123012 | 11690 | 0.05 | C_unshiu_00624 | 119244 | 130926 | 11683 | 7.21  | 99.26 |
| chr8 | 15122690 | 15129977 | 7288  | 0.03 | C_unshiu_00624 | 130929 | 138229 | 7301  | 4.5   | 98.25 |
| chr8 | 15137866 | 15144598 | 6733  | 0.03 | C_unshiu_00624 | 154431 | 161163 | 6733  | 4.15  | 99.5  |
| chr8 | 15153774 | 15158279 | 4506  | 0.02 | C_unshiu_01123 | 30827  | 26323  | 4505  | 4.81  | 99.25 |
| chr8 | 15166263 | 15169967 | 3705  | 0.02 | C_unshiu_00923 | 114438 | 110734 | 3705  | 3.24  | 99.41 |
| chr8 | 15175702 | 15177665 | 1964  | 0.01 | C_unshiu_00923 | 104502 | 102541 | 1962  | 1.71  | 99.54 |
| chr8 | 15182315 | 15189411 | 7097  | 0.03 | C_unshiu_01415 | 35835  | 42990  | 7156  | 10.25 | 98.3  |
| chr8 | 15189420 | 15201664 | 12245 | 0.05 | C_unshiu_01415 | 43112  | 55282  | 12171 | 17.43 | 98.87 |
| chr8 | 15218313 | 15222448 | 4136  | 0.02 | C_unshiu_01143 | 71542  | 75679  | 4138  | 4.51  | 99.32 |
| chr8 | 15222582 | 15234308 | 11727 | 0.05 | C_unshiu_01143 | 75850  | 87578  | 11729 | 12.79 | 99.96 |
| chr8 | 15237735 | 15243202 | 5468  | 0.02 | C_unshiu_00778 | 98445  | 103952 | 5508  | 4.19  | 98.15 |
| chr8 | 15243420 | 15246739 | 3320  | 0.01 | C_unshiu_00778 | 104625 | 107947 | 3323  | 2.53  | 99.85 |
| chr8 | 15247696 | 15250384 | 2689  | 0.01 | C_unshiu_00778 | 110033 | 112721 | 2689  | 2.05  | 100   |
| chr8 | 15251764 | 15256727 | 4964  | 0.02 | C_unshiu_00778 | 114812 | 119768 | 4957  | 3.77  | 99.5  |
| chr8 | 15256969 | 15267942 | 10974 | 0.05 | C_unshiu_00778 | 120480 | 131430 | 10951 | 8.33  | 98.23 |
| chr8 | 15261744 | 15275224 | 13481 | 0.06 | C_unshiu_00484 | 59853  | 46369  | 13485 | 6.84  | 98.74 |
| chr8 | 15278141 | 15287088 | 8948  | 0.04 | C_unshiu_00117 | 422097 | 413129 | 8969  | 2.08  | 99    |
| chr8 | 15287794 | 15299211 | 11418 | 0.05 | C_unshiu_00117 | 413123 | 401701 | 11423 | 2.64  | 99.07 |
| chr8 | 15303048 | 15309283 | 6236  | 0.03 | C_unshiu_00220 | 291087 | 284771 | 6317  | 2.01  | 98.39 |
| chr8 | 15316190 | 15331723 | 15534 | 0.07 | C_unshiu_00220 | 276022 | 260416 | 15607 | 4.96  | 98.9  |
| chr8 | 15331725 | 15333717 | 1993  | 0.01 | C_unshiu_00220 | 260191 | 258199 | 1993  | 0.63  | 98.2  |
| chr8 | 15340909 | 15345020 | 4112  | 0.02 | C_unshiu_00220 | 249125 | 245021 | 4105  | 1.3   | 98.52 |
| chr8 | 15352252 | 15354341 | 2090  | 0.01 | C_unshiu_00220 | 222522 | 220429 | 2094  | 0.67  | 99.24 |
| chr8 | 15354636 | 15356496 | 1861  | 0.01 | C_unshiu_00220 | 220128 | 218267 | 1862  | 0.59  | 99.46 |
| chr8 | 15367592 | 15382129 | 14538 | 0.06 | C_unshiu_00220 | 212386 | 197832 | 14555 | 4.62  | 98.76 |
| chr8 | 15383488 | 15388682 | 5195  | 0.02 | C_unshiu_00220 | 195106 | 189900 | 5207  | 1.65  | 98.56 |
| chr8 | 15388957 | 15416034 | 27078 | 0.11 | C_unshiu_00220 | 189902 | 162676 | 27227 | 8.65  | 98.59 |
| chr8 | 15448775 | 15450364 | 1590  | 0.01 | C_unshiu_01161 | 55781  | 57370  | 1590  | 1.77  | 99.87 |
| chr8 | 15451074 | 15453811 | 2738  | 0.01 | C_unshiu_00220 | 128351 | 125614 | 2738  | 0.87  | 99.85 |
| chr8 | 15453922 | 15471218 | 17297 | 0.07 | C_unshiu_00220 | 125478 | 108239 | 17240 | 5.48  | 98.04 |
| chr8 | 15470663 | 15474775 | 4113  | 0.02 | C_unshiu_01161 | 85643  | 89755  | 4113  | 4.58  | 99.88 |
| chr8 | 15484918 | 15486221 | 1304  | 0.01 | C_unshiu_00220 | 106402 | 105097 | 1306  | 0.41  | 99.77 |
| chr8 | 15486222 | 15490495 | 4274  | 0.02 | C_unshiu_00220 | 104598 | 100339 | 4260  | 1.35  | 98.9  |
| chr8 | 15491048 | 15499619 | 8572  | 0.04 | C_unshiu_00220 | 98877  | 90311  | 8567  | 2.72  | 98.72 |
| chr8 | 15499533 | 15510732 | 11200 | 0.05 | C_unshiu_00220 | 90354  | 79151  | 11204 | 3.56  | 98.45 |
| chr8 | 15510961 | 15519873 | 8913  | 0.04 | C_unshiu_00220 | 78131  | 69203  | 8929  | 2.84  | 99.13 |
| chr8 | 15568079 | 15574968 | 6890  | 0.03 | C_unshiu_00814 | 71221  | 64332  | 6890  | 5.42  | 99.84 |
| chr8 | 15601900 | 15617016 | 15117 | 0.06 | C_unshiu_00814 | 33479  | 18255  | 15225 | 11.98 | 98.15 |
| chr8 | 15617286 | 15633416 | 16131 | 0.07 | C_unshiu_00814 | 19503  | 3352   | 16152 | 12.71 | 98.32 |
| chr8 | 15635979 | 15637839 | 1861  | 0.01 | C_unshiu_00814 | 1913   | 75     | 1839  | 1.45  | 98.76 |
| chr8 | 15644233 | 15646232 | 2000  | 0.01 | C_unshiu_02215 | 10781  | 12780  | 2000  | 6.11  | 99.2  |
| chr8 | 15659383 | 15663519 | 4137  | 0.02 | C_unshiu_02101 | 15031  | 10909  | 4123  | 11.33 | 98.67 |
| chr8 | 15663739 | 15665143 | 1405  | 0.01 | C_unshiu_02215 | 31243  | 32647  | 1405  | 4.29  | 100   |
| chr8 | 15665164 | 15670737 | 5574  | 0.02 | C_unshiu_02101 | 7432   | 1861   | 5572  | 15.31 | 99.62 |
| chr8 | 15670845 | 15672597 | 1753  | 0.01 | C_unshiu_02101 | 1753   | 1      | 1753  | 4.82  | 100   |
| chr8 | 15683160 | 15687793 | 4634  | 0.02 | C_unshiu_02412 | 1      | 4620   | 4620  | 17.1  | 99.5  |
| chr8 | 15688144 | 15693140 | 4997  | 0.02 | C_unshiu_01553 | 10621  | 5626   | 4996  | 8.27  | 99.88 |

|      |          |          |       |      |                |        |        |       |       |       |
|------|----------|----------|-------|------|----------------|--------|--------|-------|-------|-------|
| chr8 | 15693134 | 15694359 | 1226  | 0.01 | C_unshiu_00474 | 13781  | 15006  | 1226  | 0.61  | 100   |
| chr8 | 15694360 | 15708952 | 14593 | 0.06 | C_unshiu_02412 | 8481   | 23048  | 14568 | 53.91 | 99.32 |
| chr8 | 15723226 | 15735877 | 12652 | 0.05 | C_unshiu_00682 | 21     | 12665  | 12645 | 8.52  | 99.46 |
| chr8 | 15737694 | 15740086 | 2393  | 0.01 | C_unshiu_02107 | 1      | 2393   | 2393  | 6.6   | 100   |
| chr8 | 15742730 | 15744698 | 1969  | 0.01 | C_unshiu_00682 | 15344  | 17312  | 1969  | 1.33  | 100   |
| chr8 | 15745010 | 15753403 | 8394  | 0.04 | C_unshiu_00682 | 17761  | 26127  | 8367  | 5.64  | 99.18 |
| chr8 | 15761248 | 15779642 | 18395 | 0.08 | C_unshiu_00682 | 35113  | 53553  | 18441 | 12.42 | 98.44 |
| chr8 | 15780735 | 15783963 | 3229  | 0.01 | C_unshiu_00682 | 55318  | 58552  | 3235  | 2.18  | 98.52 |
| chr8 | 15784768 | 15791285 | 6518  | 0.03 | C_unshiu_00682 | 58611  | 65141  | 6531  | 4.4   | 99.48 |
| chr8 | 15791445 | 15803866 | 12422 | 0.05 | C_unshiu_00682 | 65186  | 77616  | 12431 | 8.37  | 99.48 |
| chr8 | 15830009 | 15831650 | 1642  | 0.01 | C_unshiu_01989 | 22396  | 20755  | 1642  | 4.01  | 98.18 |
| chr8 | 15837559 | 15841130 | 3572  | 0.02 | C_unshiu_01989 | 17540  | 13962  | 3579  | 8.74  | 98.22 |
| chr8 | 15858056 | 15859741 | 1686  | 0.01 | C_unshiu_00702 | 140916 | 139241 | 1676  | 1.17  | 98.1  |
| chr8 | 15860064 | 15929234 | 69171 | 0.29 | C_unshiu_00702 | 138455 | 69238  | 69218 | 48.26 | 99.88 |
| chr8 | 15909234 | 15930549 | 21316 | 0.09 | C_unshiu_00702 | 89245  | 67923  | 21323 | 14.87 | 99.96 |
| chr8 | 15950866 | 15952921 | 2056  | 0.01 | C_unshiu_01632 | 32862  | 30823  | 2040  | 3.65  | 99.22 |
| chr8 | 15954800 | 15962581 | 7782  | 0.03 | C_unshiu_01632 | 28135  | 20353  | 7783  | 13.92 | 99.7  |
| chr8 | 15963112 | 15969388 | 6277  | 0.03 | C_unshiu_01632 | 19392  | 13103  | 6290  | 11.25 | 99.33 |
| chr8 | 15979256 | 15981627 | 2372  | 0.01 | C_unshiu_00845 | 1      | 2362   | 2362  | 1.92  | 99.45 |
| chr8 | 15982816 | 15984626 | 1811  | 0.01 | C_unshiu_00845 | 4018   | 5828   | 1811  | 1.47  | 100   |
| chr8 | 15984843 | 16002344 | 17502 | 0.07 | C_unshiu_00845 | 6476   | 23977  | 17502 | 14.22 | 99.98 |
| chr8 | 16003163 | 16005806 | 2644  | 0.01 | C_unshiu_00845 | 25274  | 27924  | 2651  | 2.15  | 99.43 |
| chr8 | 16009252 | 16017052 | 7801  | 0.03 | C_unshiu_00874 | 90110  | 82298  | 7813  | 6.51  | 99.48 |
| chr8 | 16017049 | 16021148 | 4100  | 0.02 | C_unshiu_00874 | 82254  | 78124  | 4131  | 3.44  | 98.38 |
| chr8 | 16024232 | 16033536 | 9305  | 0.04 | C_unshiu_00874 | 77123  | 67782  | 9342  | 7.79  | 99.09 |
| chr8 | 16034522 | 16052235 | 17714 | 0.07 | C_unshiu_00874 | 66367  | 48674  | 17694 | 14.75 | 99.06 |
| chr8 | 16053721 | 16063523 | 9803  | 0.04 | C_unshiu_00874 | 48679  | 38882  | 9798  | 8.17  | 98.99 |
| chr8 | 16063535 | 16069915 | 6381  | 0.03 | C_unshiu_01478 | 23467  | 29837  | 6371  | 9.86  | 99.28 |
| chr8 | 16069937 | 16074154 | 4218  | 0.02 | C_unshiu_01478 | 30861  | 35078  | 4218  | 6.53  | 99.72 |
| chr8 | 16073676 | 16077393 | 3718  | 0.02 | C_unshiu_01478 | 36211  | 39910  | 3700  | 5.73  | 98.55 |
| chr8 | 16079664 | 16081056 | 1393  | 0.01 | C_unshiu_01478 | 41912  | 43304  | 1393  | 2.16  | 99.71 |
| chr8 | 16081387 | 16097590 | 16204 | 0.07 | C_unshiu_01478 | 44031  | 60234  | 16204 | 25.08 | 99.93 |
| chr8 | 16105848 | 16107495 | 1648  | 0.01 | C_unshiu_00874 | 27059  | 25412  | 1648  | 1.37  | 100   |
| chr8 | 16129075 | 16138750 | 9676  | 0.04 | C_unshiu_00220 | 24768  | 34452  | 9685  | 3.08  | 98.73 |
| chr8 | 16138896 | 16142402 | 3507  | 0.01 | C_unshiu_01491 | 60201  | 63707  | 3507  | 5.5   | 99.2  |
| chr8 | 16142798 | 16147278 | 4481  | 0.02 | C_unshiu_02689 | 11329  | 15812  | 4484  | 22.3  | 99.71 |
| chr8 | 16148141 | 16149185 | 1045  | 0    | C_unshiu_00563 | 27592  | 28637  | 1046  | 0.6   | 98.66 |
| chr8 | 16151100 | 16156330 | 5231  | 0.02 | C_unshiu_00529 | 9340   | 14567  | 5228  | 2.84  | 99.79 |
| chr8 | 16156537 | 16159884 | 3348  | 0.01 | C_unshiu_00529 | 15135  | 18482  | 3348  | 1.82  | 100   |
| chr8 | 16164499 | 16166780 | 2282  | 0.01 | C_unshiu_00529 | 22563  | 24844  | 2282  | 1.24  | 100   |
| chr8 | 16167536 | 16175697 | 8162  | 0.03 | C_unshiu_00529 | 25886  | 34047  | 8162  | 4.43  | 99.9  |
| chr8 | 16175967 | 16185263 | 9297  | 0.04 | C_unshiu_00529 | 34075  | 43270  | 9196  | 4.99  | 98.2  |
| chr8 | 16190400 | 16191447 | 1048  | 0    | C_unshiu_02049 | 37592  | 38628  | 1037  | 2.68  | 98.66 |
| chr8 | 16197336 | 16215222 | 17887 | 0.08 | C_unshiu_00563 | 29948  | 47869  | 17922 | 10.23 | 99.06 |
| chr8 | 16217875 | 16228794 | 10920 | 0.05 | C_unshiu_00563 | 47421  | 58314  | 10894 | 6.22  | 98.08 |
| chr8 | 16232751 | 16236886 | 4136  | 0.02 | C_unshiu_01869 | 35276  | 31141  | 4136  | 9.03  | 99.95 |
| chr8 | 16236906 | 16243363 | 6458  | 0.03 | C_unshiu_01869 | 31157  | 24694  | 6464  | 14.12 | 99.23 |
| chr8 | 16240036 | 16271074 | 31039 | 0.13 | C_unshiu_00563 | 63673  | 94663  | 30991 | 17.7  | 98.69 |
| chr8 | 16271858 | 16274653 | 2796  | 0.01 | C_unshiu_00563 | 95908  | 98709  | 2802  | 1.6   | 98.61 |
| chr8 | 16276684 | 16289066 | 12383 | 0.05 | C_unshiu_00563 | 101530 | 113924 | 12395 | 7.08  | 99.65 |
| chr8 | 16308330 | 16321542 | 13213 | 0.06 | C_unshiu_00563 | 134937 | 148185 | 13249 | 7.57  | 98.38 |
| chr8 | 16322473 | 16323647 | 1175  | 0    | C_unshiu_00563 | 148512 | 149688 | 1177  | 0.67  | 99.41 |
| chr8 | 16323652 | 16347977 | 24326 | 0.1  | C_unshiu_00563 | 149922 | 174259 | 24338 | 13.9  | 99.45 |
| chr8 | 16348060 | 16349392 | 1333  | 0.01 | C_unshiu_00511 | 15031  | 16363  | 1333  | 0.71  | 100   |
| chr8 | 16350748 | 16356754 | 6007  | 0.03 | C_unshiu_00511 | 18205  | 24201  | 5997  | 3.19  | 99.02 |
| chr8 | 16356772 | 16368008 | 11237 | 0.05 | C_unshiu_00511 | 24494  | 35701  | 11208 | 5.96  | 99.62 |
| chr8 | 16373318 | 16377552 | 4235  | 0.02 | C_unshiu_00511 | 41746  | 45984  | 4239  | 2.25  | 98.7  |
| chr8 | 16377687 | 16395951 | 18265 | 0.08 | C_unshiu_00511 | 46302  | 64582  | 18281 | 9.72  | 99.7  |
| chr8 | 16414620 | 16421474 | 6855  | 0.03 | C_unshiu_01724 | 37669  | 44535  | 6867  | 13.26 | 98.94 |
| chr8 | 16421682 | 16423598 | 1917  | 0.01 | C_unshiu_00511 | 90781  | 92687  | 1907  | 1.01  | 98.12 |
| chr8 | 16428960 | 16430875 | 1916  | 0.01 | C_unshiu_00511 | 95343  | 97258  | 1916  | 1.02  | 99.95 |
| chr8 | 16456433 | 16462219 | 5787  | 0.02 | C_unshiu_00511 | 124895 | 130681 | 5787  | 3.08  | 98.49 |
| chr8 | 16499767 | 16507937 | 8171  | 0.03 | C_unshiu_01879 | 1      | 8174   | 8174  | 18.01 | 99.6  |
| chr8 | 16508798 | 16528722 | 19925 | 0.08 | C_unshiu_01879 | 9495   | 29433  | 19939 | 43.93 | 99.9  |
| chr8 | 16529658 | 16544110 | 14453 | 0.06 | C_unshiu_01879 | 30907  | 45384  | 14478 | 31.9  | 99.39 |
| chr8 | 16536805 | 16552117 | 15313 | 0.06 | C_unshiu_00511 | 157206 | 172528 | 15323 | 8.14  | 99.14 |
| chr8 | 16559276 | 16561973 | 2698  | 0.01 | C_unshiu_00517 | 1888   | 4592   | 2705  | 1.45  | 98.56 |
| chr8 | 16568017 | 16573431 | 5415  | 0.02 | C_unshiu_00517 | 11039  | 16469  | 5431  | 2.92  | 99.01 |
| chr8 | 16590121 | 16591743 | 1623  | 0.01 | C_unshiu_00517 | 30542  | 32164  | 1623  | 0.87  | 100   |
| chr8 | 16592523 | 16594445 | 1923  | 0.01 | C_unshiu_01099 | 27778  | 25856  | 1923  | 2     | 100   |
| chr8 | 16594447 | 16596317 | 1871  | 0.01 | C_unshiu_00517 | 38949  | 40820  | 1872  | 1.01  | 99.09 |
| chr8 | 16604624 | 16606210 | 1587  | 0.01 | C_unshiu_00344 | 50746  | 49160  | 1587  | 0.64  | 100   |
| chr8 | 16606894 | 16608295 | 1402  | 0.01 | C_unshiu_00815 | 4664   | 6067   | 1404  | 1.1   | 98.72 |
| chr8 | 16613668 | 16615069 | 1402  | 0.01 | C_unshiu_00815 | 11637  | 13040  | 1404  | 1.1   | 99.29 |
| chr8 | 16616406 | 16628332 | 11927 | 0.05 | C_unshiu_00815 | 14863  | 26795  | 11933 | 9.39  | 99.75 |
| chr8 | 16629950 | 16641112 | 11163 | 0.05 | C_unshiu_00815 | 27023  | 38170  | 11148 | 8.77  | 99.29 |
| chr8 | 16643093 | 16652365 | 9273  | 0.04 | C_unshiu_00815 | 46484  | 55806  | 9323  | 7.34  | 98.77 |
| chr8 | 16653229 | 16664609 | 11381 | 0.05 | C_unshiu_00815 | 57247  | 68735  | 11489 | 9.04  | 98    |
| chr8 | 16682252 | 16747927 | 65676 | 0.28 | C_unshiu_00200 | 235856 | 170181 | 65676 | 19.54 | 99.99 |

|      |          |          |        |      |                |        |        |        |       |       |
|------|----------|----------|--------|------|----------------|--------|--------|--------|-------|-------|
| chr8 | 16747477 | 16887999 | 140523 | 0.59 | C_unshiu_00200 | 169281 | 28753  | 140529 | 41.81 | 99.99 |
| chr8 | 16888338 | 16914769 | 26432  | 0.11 | C_unshiu_00200 | 27924  | 1551   | 26374  | 7.85  | 99.7  |
| chr8 | 16918416 | 16920140 | 1725   | 0.01 | C_unshiu_00511 | 114091 | 112363 | 1729   | 0.92  | 98.96 |
| chr8 | 16921113 | 16925421 | 4309   | 0.02 | C_unshiu_00511 | 111084 | 106771 | 4314   | 2.29  | 99.35 |
| chr8 | 16931266 | 16938698 | 7433   | 0.03 | C_unshiu_02970 | 4037   | 11469  | 7433   | 53.79 | 99.65 |
| chr8 | 16938816 | 16940541 | 1726   | 0.01 | C_unshiu_00268 | 74750  | 73030  | 1721   | 0.61  | 98.84 |
| chr8 | 16941622 | 16942782 | 1161   | 0    | C_unshiu_00094 | 366898 | 365739 | 1160   | 0.25  | 99.14 |
| chr8 | 16944816 | 16962706 | 17891  | 0.08 | C_unshiu_00094 | 365744 | 347824 | 17921  | 3.86  | 99.56 |
| chr8 | 16965019 | 16976177 | 11159  | 0.05 | C_unshiu_00094 | 342777 | 331619 | 11159  | 2.4   | 100   |
| chr8 | 16977594 | 17012114 | 34521  | 0.15 | C_unshiu_00094 | 329800 | 295261 | 34540  | 7.43  | 98.97 |
| chr8 | 17019392 | 17024707 | 5316   | 0.02 | C_unshiu_00124 | 152289 | 146996 | 5294   | 1.26  | 98.26 |
| chr8 | 17024971 | 17026432 | 1462   | 0.01 | C_unshiu_00124 | 146249 | 144788 | 1462   | 0.35  | 100   |
| chr8 | 17026638 | 17053453 | 26816  | 0.11 | C_unshiu_00124 | 144704 | 117888 | 26817  | 6.4   | 99.99 |
| chr8 | 17060218 | 17061959 | 1742   | 0.01 | C_unshiu_00124 | 102203 | 103944 | 1742   | 0.42  | 98.91 |
| chr8 | 17062168 | 17063925 | 1758   | 0.01 | C_unshiu_00124 | 104597 | 106354 | 1758   | 0.42  | 99.89 |
| chr8 | 17063114 | 17079390 | 16277  | 0.07 | C_unshiu_00124 | 101850 | 85573  | 16278  | 3.88  | 99.99 |
| chr8 | 17086727 | 17093443 | 6717   | 0.03 | C_unshiu_00124 | 74421  | 67697  | 6725   | 1.6   | 99.67 |
| chr8 | 17093708 | 17107289 | 13582  | 0.06 | C_unshiu_00124 | 67630  | 54068  | 13563  | 3.24  | 98.27 |
| chr8 | 17108504 | 17111643 | 3140   | 0.01 | C_unshiu_00431 | 1      | 3129   | 3129   | 1.46  | 98.38 |
| chr8 | 17112131 | 17132749 | 20619  | 0.09 | C_unshiu_00431 | 4509   | 25099  | 20591  | 9.59  | 99.24 |
| chr8 | 17151827 | 17160403 | 8577   | 0.04 | C_unshiu_00367 | 221909 | 213333 | 8577   | 3.67  | 100   |
| chr8 | 17170350 | 17334197 | 163848 | 0.69 | C_unshiu_00367 | 213333 | 49519  | 163815 | 70.18 | 99.97 |
| chr8 | 17334214 | 17381036 | 46823  | 0.2  | C_unshiu_00367 | 48641  | 1835   | 46807  | 20.05 | 99.89 |
| chr8 | 17386310 | 17421809 | 35500  | 0.15 | C_unshiu_00372 | 62222  | 97723  | 35502  | 15.3  | 99.99 |
| chr8 | 17423117 | 17429885 | 6769   | 0.03 | C_unshiu_00372 | 97704  | 104471 | 6768   | 2.92  | 99.93 |
| chr8 | 17429810 | 17475316 | 45507  | 0.19 | C_unshiu_00372 | 104453 | 149980 | 45528  | 19.62 | 99.62 |
| chr8 | 17479232 | 17485839 | 6608   | 0.03 | C_unshiu_00372 | 152891 | 159504 | 6614   | 2.85  | 99.62 |
| chr8 | 17487899 | 17491471 | 3573   | 0.02 | C_unshiu_00372 | 162388 | 165960 | 3573   | 1.54  | 99.75 |
| chr8 | 17492315 | 17499176 | 6862   | 0.03 | C_unshiu_00057 | 50836  | 57701  | 6866   | 1.16  | 98.72 |
| chr8 | 17500735 | 17537271 | 36537  | 0.15 | C_unshiu_00057 | 59759  | 96297  | 36539  | 6.19  | 99.86 |
| chr8 | 17538171 | 17544318 | 6148   | 0.03 | C_unshiu_00057 | 97522  | 103669 | 6148   | 1.04  | 100   |
| chr8 | 17544648 | 17552726 | 8079   | 0.03 | C_unshiu_00057 | 104231 | 112319 | 8089   | 1.37  | 99.77 |
| chr8 | 17552718 | 17555192 | 2475   | 0.01 | C_unshiu_00245 | 106613 | 109087 | 2475   | 0.83  | 100   |
| chr8 | 17559882 | 17565288 | 5407   | 0.02 | C_unshiu_00057 | 120225 | 125631 | 5407   | 0.92  | 100   |
| chr8 | 17566156 | 17567326 | 1171   | 0    | C_unshiu_00057 | 134566 | 135737 | 1172   | 0.2   | 99.74 |
| chr8 | 17568210 | 17594580 | 26371  | 0.11 | C_unshiu_00057 | 137209 | 163432 | 26224  | 4.44  | 98.5  |
| chr8 | 17594427 | 17631032 | 36606  | 0.15 | C_unshiu_00057 | 163404 | 200006 | 36603  | 6.2   | 99.92 |
| chr8 | 17631199 | 17683413 | 52215  | 0.22 | C_unshiu_00057 | 200292 | 252531 | 52240  | 8.84  | 99.91 |
| chr8 | 17683587 | 17745994 | 62408  | 0.26 | C_unshiu_00057 | 253085 | 315437 | 62353  | 10.56 | 99.68 |
| chr8 | 17746512 | 17750322 | 3811   | 0.02 | C_unshiu_00057 | 316316 | 320125 | 3810   | 0.64  | 99.87 |
| chr8 | 17751811 | 17756086 | 4276   | 0.02 | C_unshiu_00057 | 322178 | 326469 | 4292   | 0.73  | 99.39 |
| chr8 | 17756680 | 17787143 | 30464  | 0.13 | C_unshiu_00057 | 334145 | 364594 | 30450  | 5.15  | 99.91 |
| chr8 | 17805683 | 17807036 | 1354   | 0.01 | C_unshiu_00768 | 131448 | 130093 | 1356   | 1.02  | 99.41 |
| chr8 | 17828426 | 17829961 | 1536   | 0.01 | C_unshiu_00277 | 157479 | 159014 | 1536   | 0.55  | 100   |
| chr8 | 17831447 | 17833091 | 1645   | 0.01 | C_unshiu_00768 | 116497 | 114848 | 1650   | 1.24  | 99.09 |
| chr8 | 17838845 | 17841393 | 2549   | 0.01 | C_unshiu_00768 | 109498 | 106945 | 2554   | 1.92  | 99.61 |
| chr8 | 17845168 | 17901000 | 55833  | 0.24 | C_unshiu_01184 | 87082  | 31228  | 55855  | 64.14 | 99.91 |
| chr8 | 17901000 | 17932116 | 31117  | 0.13 | C_unshiu_01184 | 31110  | 2      | 31109  | 35.72 | 99.97 |
| chr8 | 17938374 | 17961515 | 23142  | 0.1  | C_unshiu_00360 | 153593 | 130469 | 23125  | 9.78  | 99.88 |
| chr8 | 17965029 | 18032074 | 67046  | 0.28 | C_unshiu_00360 | 126562 | 59499  | 67064  | 28.37 | 99.88 |
| chr8 | 18038025 | 18046316 | 8292   | 0.04 | C_unshiu_00390 | 54696  | 46435  | 8262   | 3.67  | 99.22 |
| chr8 | 18046373 | 18049822 | 3450   | 0.01 | C_unshiu_00390 | 46262  | 42813  | 3450   | 1.53  | 100   |
| chr8 | 18049828 | 18052380 | 2553   | 0.01 | C_unshiu_00390 | 42564  | 40012  | 2553   | 1.13  | 99.96 |
| chr8 | 18053773 | 18056246 | 2474   | 0.01 | C_unshiu_00390 | 37754  | 35281  | 2474   | 1.1   | 100   |
| chr8 | 18056263 | 18061002 | 4740   | 0.02 | C_unshiu_00332 | 42772  | 47518  | 4747   | 1.89  | 98.95 |
| chr8 | 18063321 | 18064920 | 1600   | 0.01 | C_unshiu_00332 | 50542  | 52146  | 1605   | 0.64  | 99.44 |
| chr8 | 18068968 | 18071595 | 2628   | 0.01 | C_unshiu_00332 | 55705  | 58336  | 2632   | 1.05  | 98.86 |
| chr8 | 18073394 | 18076617 | 3224   | 0.01 | C_unshiu_00332 | 62111  | 65318  | 3208   | 1.28  | 99.35 |
| chr8 | 18076786 | 18081383 | 4598   | 0.02 | C_unshiu_00332 | 65700  | 70303  | 4604   | 1.83  | 99.46 |
| chr8 | 18082579 | 18088284 | 5706   | 0.02 | C_unshiu_00332 | 71961  | 77667  | 5707   | 2.27  | 99.16 |
| chr8 | 18089584 | 18105591 | 16008  | 0.07 | C_unshiu_00332 | 78951  | 94958  | 16008  | 6.36  | 99.43 |
| chr8 | 18105582 | 18108491 | 2910   | 0.01 | C_unshiu_00332 | 95563  | 98469  | 2907   | 1.16  | 99    |
| chr8 | 18110377 | 18112710 | 2334   | 0.01 | C_unshiu_00332 | 100563 | 102900 | 2338   | 0.93  | 99.44 |
| chr8 | 18112835 | 18119713 | 6879   | 0.03 | C_unshiu_00332 | 103249 | 110047 | 6799   | 2.7   | 98.42 |
| chr8 | 18119713 | 18143798 | 24086  | 0.1  | C_unshiu_00332 | 110320 | 134437 | 24118  | 9.59  | 99.44 |
| chr8 | 18144533 | 18146647 | 2115   | 0.01 | C_unshiu_00332 | 135396 | 137510 | 2115   | 0.84  | 99.91 |
| chr8 | 18147188 | 18211943 | 64756  | 0.27 | C_unshiu_00332 | 139887 | 204690 | 64804  | 25.76 | 99.58 |
| chr8 | 18217917 | 18223473 | 5557   | 0.02 | C_unshiu_00557 | 4277   | 9829   | 5553   | 3.14  | 99.41 |
| chr8 | 18223496 | 18235566 | 12071  | 0.05 | C_unshiu_00557 | 9147   | 21137  | 11991  | 6.79  | 98.46 |
| chr8 | 18235661 | 18236907 | 1247   | 0.01 | C_unshiu_00557 | 21526  | 22775  | 1250   | 0.71  | 99.44 |
| chr8 | 18238233 | 18249506 | 11274  | 0.05 | C_unshiu_00557 | 24394  | 35645  | 11252  | 6.37  | 99.41 |
| chr8 | 18265115 | 18287833 | 22719  | 0.1  | C_unshiu_00557 | 50701  | 73515  | 22815  | 12.92 | 99.28 |
| chr8 | 18287858 | 18290354 | 2497   | 0.01 | C_unshiu_00557 | 73412  | 75906  | 2495   | 1.41  | 98.44 |
| chr8 | 18293568 | 18295563 | 1996   | 0.01 | C_unshiu_00557 | 79048  | 81044  | 1997   | 1.13  | 99.6  |
| chr8 | 18295576 | 18297038 | 1463   | 0.01 | C_unshiu_00557 | 81339  | 82788  | 1450   | 0.82  | 98.97 |
| chr8 | 18297481 | 18302475 | 4995   | 0.02 | C_unshiu_00017 | 4964   | 1      | 4964   | 0.58  | 98.48 |
| chr8 | 18298035 | 18303902 | 5868   | 0.02 | C_unshiu_00557 | 84392  | 90267  | 5876   | 3.33  | 99.68 |
| chr8 | 18303898 | 18311710 | 7813   | 0.03 | C_unshiu_00557 | 97831  | 105672 | 7842   | 4.44  | 99.16 |
| chr8 | 18312522 | 18314636 | 2115   | 0.01 | C_unshiu_00557 | 107081 | 109206 | 2126   | 1.2   | 99.39 |

|      |          |          |       |      |                |        |        |       |       |       |
|------|----------|----------|-------|------|----------------|--------|--------|-------|-------|-------|
| chr8 | 18317294 | 18321250 | 3957  | 0.02 | C_unshiu_00557 | 109337 | 113301 | 3965  | 2.25  | 98.57 |
| chr8 | 18321241 | 18323527 | 2287  | 0.01 | C_unshiu_00557 | 114326 | 116605 | 2280  | 1.29  | 99.3  |
| chr8 | 18331965 | 18333386 | 1422  | 0.01 | C_unshiu_00557 | 123394 | 124817 | 1424  | 0.81  | 98.95 |
| chr8 | 18334846 | 18336795 | 1950  | 0.01 | C_unshiu_00557 | 124812 | 126764 | 1953  | 1.11  | 98.52 |
| chr8 | 18340472 | 18346519 | 6048  | 0.03 | C_unshiu_00557 | 131513 | 137585 | 6073  | 3.44  | 98.88 |
| chr8 | 18348023 | 18363860 | 15838 | 0.07 | C_unshiu_00557 | 139446 | 155296 | 15851 | 8.98  | 98.85 |
| chr8 | 18383596 | 18387269 | 3674  | 0.02 | C_unshiu_00085 | 56233  | 52560  | 3674  | 0.78  | 99.92 |
| chr8 | 18389113 | 18401059 | 11947 | 0.05 | C_unshiu_00085 | 50031  | 38085  | 11947 | 2.53  | 99.98 |
| chr8 | 18410215 | 18411541 | 1327  | 0.01 | C_unshiu_02149 | 2007   | 3334   | 1328  | 3.77  | 99.92 |
| chr8 | 18413109 | 18415837 | 2729  | 0.01 | C_unshiu_02149 | 5595   | 8287   | 2693  | 7.65  | 98.1  |
| chr8 | 18416442 | 18419138 | 2697  | 0.01 | C_unshiu_02149 | 9053   | 11711  | 2659  | 7.56  | 98.04 |
| chr8 | 18425875 | 18426965 | 1091  | 0    | C_unshiu_02149 | 17719  | 18808  | 1090  | 3.1   | 99.73 |
| chr8 | 18427632 | 18428885 | 1254  | 0.01 | C_unshiu_00382 | 10370  | 9117   | 1254  | 0.55  | 99.68 |
| chr8 | 18429127 | 18435688 | 6562  | 0.03 | C_unshiu_02149 | 19252  | 25784  | 6533  | 18.57 | 99.56 |
| chr8 | 18435669 | 18437405 | 1737  | 0.01 | C_unshiu_00795 | 81440  | 79705  | 1736  | 1.35  | 99.94 |
| chr8 | 18442205 | 18444699 | 2495  | 0.01 | C_unshiu_00085 | 32429  | 29930  | 2500  | 0.53  | 99.4  |
| chr8 | 18444724 | 18469401 | 24678 | 0.1  | C_unshiu_00085 | 30817  | 6097   | 24721 | 5.23  | 98.56 |
| chr8 | 18469401 | 18475368 | 5968  | 0.03 | C_unshiu_00085 | 5947   | 1      | 5947  | 1.26  | 98.11 |
| chr8 | 18490227 | 18492527 | 2301  | 0.01 | C_unshiu_01959 | 5950   | 3648   | 2303  | 5.43  | 99.04 |
| chr8 | 18492534 | 18495420 | 2887  | 0.01 | C_unshiu_01959 | 2890   | 1      | 2890  | 6.81  | 99    |
| chr8 | 18500804 | 18502045 | 1242  | 0.01 | C_unshiu_02006 | 17125  | 18369  | 1245  | 3.07  | 98.48 |
| chr8 | 18502048 | 18514353 | 12306 | 0.05 | C_unshiu_02006 | 18740  | 31043  | 12304 | 30.38 | 99.44 |
| chr8 | 18515485 | 18528784 | 13300 | 0.06 | C_unshiu_00362 | 227239 | 213959 | 13281 | 5.62  | 98.74 |
| chr8 | 18534706 | 18541537 | 6832  | 0.03 | C_unshiu_00362 | 207617 | 200757 | 6861  | 2.9   | 98.22 |
| chr8 | 18542453 | 18548603 | 6151  | 0.03 | C_unshiu_00362 | 200427 | 194257 | 6171  | 2.61  | 98.41 |
| chr8 | 18548683 | 18552704 | 4022  | 0.02 | C_unshiu_00362 | 194322 | 190279 | 4044  | 1.71  | 98.47 |
| chr8 | 18552845 | 18564471 | 11627 | 0.05 | C_unshiu_00362 | 190280 | 178662 | 11619 | 4.92  | 99.12 |
| chr8 | 18564621 | 18568554 | 3934  | 0.02 | C_unshiu_00362 | 178662 | 174719 | 3944  | 1.67  | 98.18 |
| chr8 | 18581182 | 18582483 | 1302  | 0.01 | C_unshiu_00362 | 162555 | 161254 | 1302  | 0.55  | 100   |
| chr8 | 18584129 | 18586704 | 2576  | 0.01 | C_unshiu_00362 | 158761 | 156185 | 2577  | 1.09  | 99.69 |
| chr8 | 18590987 | 18598644 | 7658  | 0.03 | C_unshiu_00362 | 150737 | 143080 | 7658  | 3.24  | 100   |
| chr8 | 18598665 | 18599974 | 1310  | 0.01 | C_unshiu_00362 | 141837 | 140528 | 1310  | 0.55  | 98.4  |
| chr8 | 18603853 | 18626347 | 22495 | 0.1  | C_unshiu_00362 | 136653 | 114178 | 22476 | 9.51  | 99.58 |
| chr8 | 18641836 | 18645770 | 3935  | 0.02 | C_unshiu_00362 | 107861 | 103901 | 3961  | 1.68  | 98.66 |
| chr8 | 18650841 | 18656382 | 5542  | 0.02 | C_unshiu_00362 | 98090  | 92529  | 5562  | 2.35  | 98.98 |
| chr8 | 18656380 | 18666168 | 9789  | 0.04 | C_unshiu_00362 | 92027  | 82239  | 9789  | 4.14  | 99.47 |
| chr8 | 18666140 | 18677631 | 11492 | 0.05 | C_unshiu_00362 | 82184  | 70700  | 11485 | 4.86  | 99.69 |
| chr8 | 18687917 | 18688984 | 1068  | 0    | C_unshiu_00212 | 45130  | 44063  | 1068  | 0.33  | 98.78 |
| chr8 | 18702892 | 18705572 | 2681  | 0.01 | C_unshiu_00362 | 52639  | 49956  | 2684  | 1.14  | 99.03 |
| chr8 | 18705451 | 18709753 | 4303  | 0.02 | C_unshiu_00362 | 49957  | 45675  | 4283  | 1.81  | 99.42 |
| chr8 | 18710357 | 18716199 | 5843  | 0.02 | C_unshiu_00362 | 40466  | 34623  | 5844  | 2.47  | 99.91 |
| chr8 | 18720695 | 18722683 | 1989  | 0.01 | C_unshiu_00362 | 26506  | 28503  | 1998  | 0.85  | 98.5  |
| chr8 | 18720780 | 18724022 | 3243  | 0.01 | C_unshiu_02286 | 20264  | 23508  | 3245  | 10.73 | 98.86 |
| chr8 | 18737421 | 18740303 | 2883  | 0.01 | C_unshiu_00362 | 13185  | 10296  | 2890  | 1.22  | 98.93 |
| chr8 | 18744501 | 18747795 | 3295  | 0.01 | C_unshiu_00362 | 4506   | 1209   | 3298  | 1.4   | 99.91 |
| chr8 | 18749530 | 18759683 | 10154 | 0.04 | C_unshiu_02959 | 10153  | 1      | 10153 | 71.61 | 99.67 |
| chr8 | 18765860 | 18782201 | 16342 | 0.07 | C_unshiu_02198 | 14874  | 31314  | 16441 | 49.43 | 98.41 |
| chr8 | 18785282 | 18795447 | 10166 | 0.04 | C_unshiu_01962 | 28165  | 38363  | 10199 | 24.12 | 98.71 |
| chr8 | 18792029 | 18815674 | 23646 | 0.1  | C_unshiu_02171 | 34371  | 10709  | 23663 | 68.85 | 98.37 |
| chr8 | 18815796 | 18818140 | 2345  | 0.01 | C_unshiu_02171 | 10686  | 8341   | 2346  | 6.83  | 99.4  |
| chr8 | 18820152 | 18823193 | 3042  | 0.01 | C_unshiu_02171 | 7273   | 4234   | 3040  | 8.84  | 98.85 |
| chr8 | 18823249 | 18825124 | 1876  | 0.01 | C_unshiu_02171 | 4445   | 2570   | 1876  | 5.46  | 99.15 |
| chr8 | 18849488 | 18851002 | 1515  | 0.01 | C_unshiu_02356 | 18791  | 17277  | 1515  | 5.37  | 100   |
| chr8 | 18851003 | 18854683 | 3681  | 0.02 | C_unshiu_02986 | 6441   | 10113  | 3673  | 27.64 | 98.29 |
| chr8 | 18855276 | 18861337 | 6062  | 0.03 | C_unshiu_01515 | 33396  | 39446  | 6051  | 9.7   | 98.51 |
| chr8 | 18863506 | 18866591 | 3086  | 0.01 | C_unshiu_01515 | 18806  | 21891  | 3086  | 4.94  | 99.9  |
| chr8 | 18866620 | 18869458 | 2839  | 0.01 | C_unshiu_01515 | 21628  | 24469  | 2842  | 4.55  | 99.58 |
| chr8 | 18869509 | 18871690 | 2182  | 0.01 | C_unshiu_01515 | 24727  | 26909  | 2183  | 3.5   | 99.95 |
| chr8 | 18874795 | 18877956 | 3162  | 0.01 | C_unshiu_02986 | 9854   | 13014  | 3161  | 23.78 | 99.15 |
| chr8 | 18890716 | 18892676 | 1961  | 0.01 | C_unshiu_01515 | 53999  | 55945  | 1947  | 3.12  | 98.37 |
| chr8 | 18902941 | 18908083 | 5143  | 0.02 | C_unshiu_00673 | 23778  | 28939  | 5162  | 3.43  | 99.21 |
| chr8 | 18908099 | 18909656 | 1558  | 0.01 | C_unshiu_00673 | 31713  | 33269  | 1557  | 1.03  | 99.94 |
| chr8 | 18917224 | 18922710 | 5487  | 0.02 | C_unshiu_00630 | 85335  | 79848  | 5488  | 3.41  | 99.53 |
| chr8 | 18929501 | 18935325 | 5825  | 0.02 | C_unshiu_00630 | 78253  | 72402  | 5852  | 3.64  | 98.65 |
| chr8 | 18938696 | 18942866 | 4171  | 0.02 | C_unshiu_00630 | 69892  | 65729  | 4164  | 2.59  | 98.59 |
| chr8 | 18944776 | 18955616 | 10841 | 0.05 | C_unshiu_00630 | 65095  | 54207  | 10889 | 6.77  | 98.32 |
| chr8 | 18955776 | 18967769 | 11994 | 0.05 | C_unshiu_00630 | 53908  | 41891  | 12018 | 7.47  | 98.99 |
| chr8 | 18969735 | 18972217 | 2483  | 0.01 | C_unshiu_00630 | 41226  | 38742  | 2485  | 1.54  | 99.64 |
| chr8 | 18972368 | 18976144 | 3777  | 0.02 | C_unshiu_00630 | 37805  | 34029  | 3777  | 2.35  | 99.87 |
| chr8 | 18976303 | 18977747 | 1445  | 0.01 | C_unshiu_00630 | 33653  | 32209  | 1445  | 0.9   | 100   |
| chr8 | 18981443 | 18987035 | 5593  | 0.02 | C_unshiu_00630 | 31350  | 25719  | 5632  | 3.5   | 98.42 |
| chr8 | 18987024 | 18989876 | 2853  | 0.01 | C_unshiu_00630 | 25572  | 22709  | 2864  | 1.78  | 98.05 |
| chr8 | 18989891 | 18999050 | 9160  | 0.04 | C_unshiu_00630 | 19918  | 10723  | 9196  | 5.72  | 98.08 |
| chr8 | 18999930 | 19001034 | 1105  | 0    | C_unshiu_00630 | 10575  | 9469   | 1107  | 0.69  | 99.01 |
| chr8 | 19005422 | 19014749 | 9328  | 0.04 | C_unshiu_00560 | 81741  | 72380  | 9362  | 5.34  | 98.83 |
| chr8 | 19024963 | 19040754 | 15792 | 0.07 | C_unshiu_00560 | 64232  | 48439  | 15794 | 9.01  | 98.51 |
| chr8 | 19058065 | 19064726 | 6662  | 0.03 | C_unshiu_00560 | 47350  | 40692  | 6659  | 3.8   | 98.03 |
| chr8 | 19093258 | 19099679 | 6422  | 0.03 | C_unshiu_00560 | 13226  | 6798   | 6429  | 3.67  | 99.14 |
| chr8 | 19097638 | 19120893 | 23256 | 0.1  | C_unshiu_01394 | 25779  | 49045  | 23267 | 32.84 | 98.25 |

|      |          |          |       |      |                |        |        |       |       |       |
|------|----------|----------|-------|------|----------------|--------|--------|-------|-------|-------|
| chr8 | 19120801 | 19137232 | 16432 | 0.07 | C_unshiu_01394 | 49216  | 65624  | 16409 | 23.16 | 98.85 |
| chr8 | 19164284 | 19175430 | 11147 | 0.05 | C_unshiu_01175 | 70234  | 59093  | 11142 | 12.67 | 98.31 |
| chr8 | 19180559 | 19182552 | 1994  | 0.01 | C_unshiu_01175 | 54237  | 52253  | 1985  | 2.26  | 98.45 |
| chr8 | 19182552 | 19192467 | 9916  | 0.04 | C_unshiu_01175 | 52079  | 42131  | 9949  | 11.31 | 99.04 |
| chr8 | 19199106 | 19202508 | 3403  | 0.01 | C_unshiu_01175 | 32738  | 29334  | 3405  | 3.87  | 98.44 |
| chr8 | 19205941 | 19213277 | 7337  | 0.03 | C_unshiu_01175 | 25282  | 17926  | 7357  | 8.37  | 98.29 |
| chr8 | 19218606 | 19222142 | 3537  | 0.01 | C_unshiu_01175 | 11973  | 8432   | 3542  | 4.03  | 99.1  |
| chr8 | 19224350 | 19229753 | 5404  | 0.02 | C_unshiu_01175 | 5406   | 1      | 5406  | 6.15  | 99.39 |
| chr8 | 19239944 | 19244232 | 4289  | 0.02 | C_unshiu_02145 | 804    | 5135   | 4332  | 12.29 | 98.43 |
| chr8 | 19244623 | 19246965 | 2343  | 0.01 | C_unshiu_00560 | 104764 | 107108 | 2345  | 1.34  | 99.45 |
| chr8 | 19246978 | 19248852 | 1875  | 0.01 | C_unshiu_00560 | 108023 | 109896 | 1874  | 1.07  | 99.79 |
| chr8 | 19248866 | 19255949 | 7084  | 0.03 | C_unshiu_00560 | 110094 | 117184 | 7091  | 4.05  | 98.06 |
| chr8 | 19257318 | 19260924 | 3607  | 0.02 | C_unshiu_02145 | 18907  | 22516  | 3610  | 10.24 | 98.09 |
| chr8 | 19261596 | 19264263 | 2668  | 0.01 | C_unshiu_00560 | 121522 | 124189 | 2668  | 1.52  | 100   |
| chr8 | 19264720 | 19269861 | 5142  | 0.02 | C_unshiu_02145 | 30100  | 35244  | 5145  | 14.6  | 99.34 |
| chr8 | 19266163 | 19271536 | 5374  | 0.02 | C_unshiu_00560 | 126124 | 131490 | 5367  | 3.06  | 98.36 |
| chr8 | 19271876 | 19282434 | 10559 | 0.04 | C_unshiu_00560 | 131956 | 142505 | 10550 | 6.02  | 98.33 |
| chr8 | 19285876 | 19291744 | 5869  | 0.02 | C_unshiu_00560 | 147340 | 153209 | 5870  | 3.35  | 99.44 |
| chr8 | 19291665 | 19313009 | 21345 | 0.09 | C_unshiu_00560 | 153207 | 174494 | 21288 | 12.14 | 98.3  |
| chr8 | 19310199 | 19313011 | 2813  | 0.01 | C_unshiu_00692 | 115702 | 112893 | 2810  | 1.94  | 98.69 |
| chr8 | 19314601 | 19321895 | 7295  | 0.03 | C_unshiu_01146 | 85747  | 78450  | 7298  | 8     | 99.47 |
| chr8 | 19324348 | 19326929 | 2582  | 0.01 | C_unshiu_01146 | 77347  | 74768  | 2580  | 2.83  | 99.38 |
| chr8 | 19334807 | 19336209 | 1403  | 0.01 | C_unshiu_01375 | 25965  | 27367  | 1403  | 1.94  | 100   |
| chr8 | 19347405 | 19349277 | 1873  | 0.01 | C_unshiu_00556 | 158104 | 159976 | 1873  | 1.06  | 100   |
| chr8 | 19361845 | 19363869 | 2025  | 0.01 | C_unshiu_01146 | 48477  | 46452  | 2026  | 2.22  | 98.57 |
| chr8 | 19365452 | 19395698 | 30247 | 0.13 | C_unshiu_01146 | 44360  | 14095  | 30266 | 33.19 | 98.19 |
| chr8 | 19404468 | 19408608 | 4141  | 0.02 | C_unshiu_01832 | 40363  | 36227  | 4137  | 8.74  | 99.23 |
| chr8 | 19408607 | 19421717 | 13111 | 0.06 | C_unshiu_01832 | 36327  | 23167  | 13161 | 27.8  | 98.75 |
| chr8 | 19424103 | 19426469 | 2367  | 0.01 | C_unshiu_01832 | 22086  | 19720  | 2367  | 5     | 99.96 |
| chr8 | 19429604 | 19447733 | 18130 | 0.08 | C_unshiu_01832 | 19669  | 1487   | 18183 | 38.4  | 98.12 |
| chr8 | 19448811 | 19454886 | 6076  | 0.03 | C_unshiu_02623 | 21609  | 15552  | 6058  | 28.03 | 99.51 |
| chr8 | 19456878 | 19461908 | 5031  | 0.02 | C_unshiu_02623 | 13084  | 8055   | 5030  | 23.28 | 98.26 |
| chr8 | 19466668 | 19485084 | 18417 | 0.08 | C_unshiu_02067 | 37993  | 19646  | 18348 | 48.24 | 98.42 |
| chr8 | 19478360 | 19487321 | 8962  | 0.04 | C_unshiu_00788 | 52593  | 61618  | 9026  | 6.93  | 98.26 |
| chr8 | 19488057 | 19491105 | 3049  | 0.01 | C_unshiu_02067 | 17593  | 14545  | 3049  | 8.02  | 100   |
| chr8 | 19491852 | 19495027 | 3176  | 0.01 | C_unshiu_02067 | 12017  | 8842   | 3176  | 8.35  | 100   |
| chr8 | 19495051 | 19503623 | 8573  | 0.04 | C_unshiu_02067 | 8524   | 1      | 8524  | 22.41 | 99.37 |
| chr8 | 19514535 | 19538688 | 24154 | 0.1  | C_unshiu_00788 | 71723  | 96004  | 24282 | 18.65 | 98.09 |
| chr8 | 19540173 | 19542827 | 2655  | 0.01 | C_unshiu_01444 | 58663  | 56009  | 2655  | 3.95  | 100   |
| chr8 | 19542963 | 19545509 | 2547  | 0.01 | C_unshiu_01444 | 55757  | 53211  | 2547  | 3.79  | 100   |
| chr8 | 19545796 | 19548329 | 2534  | 0.01 | C_unshiu_01444 | 52751  | 50217  | 2535  | 3.77  | 99.61 |
| chr8 | 19546143 | 19548329 | 2187  | 0.01 | C_unshiu_00788 | 102002 | 104190 | 2189  | 1.68  | 98.68 |
| chr8 | 19548750 | 19550007 | 1258  | 0.01 | C_unshiu_00788 | 104635 | 105891 | 1257  | 0.97  | 98.25 |
| chr8 | 19555944 | 19559272 | 3329  | 0.01 | C_unshiu_01444 | 45509  | 42181  | 3329  | 4.95  | 98.95 |
| chr8 | 19563101 | 19565921 | 2821  | 0.01 | C_unshiu_01444 | 36572  | 33752  | 2821  | 4.2   | 100   |
| chr8 | 19566422 | 19571116 | 4695  | 0.02 | C_unshiu_01444 | 33867  | 29113  | 4755  | 7.08  | 98.19 |
| chr8 | 19575963 | 19579607 | 3645  | 0.02 | C_unshiu_02158 | 16230  | 12594  | 3637  | 10.49 | 98.77 |
| chr8 | 19584912 | 19586677 | 1766  | 0.01 | C_unshiu_01444 | 18367  | 16602  | 1766  | 2.63  | 100   |
| chr8 | 19587139 | 19590234 | 3096  | 0.01 | C_unshiu_02158 | 7058   | 3967   | 3092  | 8.92  | 98.68 |
| chr8 | 19592788 | 19594185 | 1398  | 0.01 | C_unshiu_01444 | 10586  | 9189   | 1398  | 2.08  | 100   |
| chr8 | 19598464 | 19600425 | 1962  | 0.01 | C_unshiu_00531 | 59799  | 61751  | 1953  | 1.06  | 98.12 |
| chr8 | 19607857 | 19613905 | 6049  | 0.03 | C_unshiu_00531 | 61670  | 67686  | 6017  | 3.27  | 98.08 |
| chr8 | 19612663 | 19614520 | 1858  | 0.01 | C_unshiu_00531 | 68173  | 70031  | 1859  | 1.01  | 98.39 |
| chr8 | 19615374 | 19620860 | 5487  | 0.02 | C_unshiu_00531 | 71126  | 76588  | 5463  | 2.97  | 99.34 |
| chr8 | 19621922 | 19647458 | 25537 | 0.11 | C_unshiu_00531 | 77990  | 103514 | 25525 | 13.89 | 99.51 |
| chr8 | 19656020 | 19659250 | 3231  | 0.01 | C_unshiu_00531 | 105328 | 108557 | 3230  | 1.76  | 99.38 |
| chr8 | 19686339 | 19692657 | 6319  | 0.03 | C_unshiu_01031 | 16844  | 23162  | 6319  | 6.14  | 99.97 |
| chr8 | 19706005 | 19707307 | 1303  | 0.01 | C_unshiu_01031 | 30652  | 31954  | 1303  | 1.27  | 99.85 |
| chr8 | 19715891 | 19717114 | 1224  | 0.01 | C_unshiu_01031 | 33486  | 34710  | 1225  | 1.19  | 99.92 |
| chr8 | 19717208 | 19721007 | 3800  | 0.02 | C_unshiu_01031 | 35065  | 38868  | 3804  | 3.69  | 99.79 |
| chr8 | 19721563 | 19745268 | 23706 | 0.1  | C_unshiu_01031 | 39780  | 63433  | 23654 | 22.97 | 98.31 |
| chr8 | 19745543 | 19747216 | 1674  | 0.01 | C_unshiu_01946 | 17183  | 18856  | 1674  | 3.9   | 98.69 |
| chr8 | 19748658 | 19750458 | 1801  | 0.01 | C_unshiu_01031 | 67311  | 69111  | 1801  | 1.75  | 99.94 |
| chr8 | 19754754 | 19758671 | 3918  | 0.02 | C_unshiu_03103 | 2107   | 6023   | 3917  | 41.78 | 99.95 |
| chr8 | 19766857 | 19771738 | 4882  | 0.02 | C_unshiu_01001 | 47997  | 52861  | 4865  | 4.59  | 98.57 |
| chr8 | 19772558 | 19780170 | 7613  | 0.03 | C_unshiu_01001 | 54024  | 61701  | 7678  | 7.24  | 98.92 |
| chr8 | 19780932 | 19794308 | 13377 | 0.06 | C_unshiu_01001 | 63298  | 76674  | 13377 | 12.62 | 99.9  |
| chr8 | 19797264 | 19799849 | 2586  | 0.01 | C_unshiu_01001 | 78411  | 80995  | 2585  | 2.44  | 98.92 |
| chr8 | 19801327 | 19803924 | 2598  | 0.01 | C_unshiu_00616 | 119338 | 116741 | 2598  | 1.58  | 100   |
| chr8 | 19803258 | 19804372 | 1115  | 0    | C_unshiu_00616 | 112801 | 111691 | 1111  | 0.68  | 99.55 |
| chr8 | 19805455 | 19824223 | 18769 | 0.08 | C_unshiu_00616 | 110623 | 91887  | 18737 | 11.43 | 98.83 |
| chr8 | 19831724 | 19840984 | 9261  | 0.04 | C_unshiu_00233 | 75559  | 66311  | 9249  | 3.02  | 99.18 |
| chr8 | 19841948 | 19844948 | 3001  | 0.01 | C_unshiu_00233 | 65118  | 62093  | 3026  | 0.99  | 98.18 |
| chr8 | 19856931 | 19868562 | 11632 | 0.05 | C_unshiu_00892 | 49433  | 37827  | 11607 | 9.86  | 99.36 |
| chr8 | 19869462 | 19874013 | 4552  | 0.02 | C_unshiu_00892 | 36393  | 31832  | 4562  | 3.88  | 98.42 |
| chr8 | 19876355 | 19877423 | 1069  | 0    | C_unshiu_01060 | 14612  | 15680  | 1069  | 1.08  | 99.72 |
| chr8 | 19878999 | 19880034 | 1036  | 0    | C_unshiu_00892 | 1024   | 1      | 1024  | 0.87  | 98.84 |
| chr8 | 19880155 | 19882148 | 1994  | 0.01 | C_unshiu_00148 | 332620 | 330632 | 1989  | 0.51  | 98.2  |
| chr8 | 19882295 | 19889799 | 7505  | 0.03 | C_unshiu_00736 | 19157  | 26658  | 7502  | 5.43  | 99.93 |

|      |          |          |       |      |                |        |        |       |       |       |
|------|----------|----------|-------|------|----------------|--------|--------|-------|-------|-------|
| chr8 | 19890388 | 19894480 | 4093  | 0.02 | C_unshiu_00736 | 13958  | 18050  | 4093  | 2.96  | 99.93 |
| chr8 | 19894473 | 19896349 | 1877  | 0.01 | C_unshiu_00783 | 116028 | 117904 | 1877  | 1.44  | 100   |
| chr8 | 19903129 | 19904906 | 1778  | 0.01 | C_unshiu_01210 | 16062  | 14269  | 1794  | 2.13  | 99    |
| chr8 | 19905241 | 19910890 | 5650  | 0.02 | C_unshiu_01210 | 13578  | 7948   | 5631  | 6.68  | 99.49 |
| chr8 | 19918300 | 19922675 | 4376  | 0.02 | C_unshiu_00736 | 32611  | 37008  | 4398  | 3.18  | 99.16 |
| chr8 | 19930182 | 19932876 | 2695  | 0.01 | C_unshiu_00736 | 49206  | 51902  | 2697  | 1.95  | 99.59 |
| chr8 | 19936478 | 19938457 | 1980  | 0.01 | C_unshiu_00736 | 51677  | 53657  | 1981  | 1.43  | 99.29 |
| chr8 | 19942150 | 19950205 | 8056  | 0.03 | C_unshiu_00736 | 55973  | 64044  | 8072  | 5.84  | 99.34 |
| chr8 | 19951114 | 19956414 | 5301  | 0.02 | C_unshiu_00736 | 65430  | 70737  | 5308  | 3.84  | 99.21 |
| chr8 | 19981788 | 19983712 | 1925  | 0.01 | C_unshiu_00736 | 89261  | 91193  | 1933  | 1.4   | 98.76 |
| chr8 | 19999375 | 20001318 | 1944  | 0.01 | C_unshiu_00736 | 102231 | 104174 | 1944  | 1.41  | 100   |
| chr8 | 20001342 | 20023171 | 21830 | 0.09 | C_unshiu_00736 | 108211 | 130041 | 21831 | 15.8  | 98.76 |
| chr8 | 20030906 | 20035183 | 4278  | 0.02 | C_unshiu_01293 | 56094  | 51809  | 4286  | 5.49  | 99.42 |
| chr8 | 20035184 | 20040375 | 5192  | 0.02 | C_unshiu_01293 | 51545  | 46314  | 5232  | 6.7   | 98.21 |
| chr8 | 20057518 | 20068925 | 11408 | 0.05 | C_unshiu_01293 | 28098  | 16703  | 11396 | 14.6  | 99.04 |
| chr8 | 20063336 | 20091856 | 28521 | 0.12 | C_unshiu_00589 | 1      | 28506  | 28506 | 16.79 | 98.14 |
| chr8 | 20102543 | 20108818 | 6276  | 0.03 | C_unshiu_00589 | 38079  | 44341  | 6263  | 3.69  | 98.22 |
| chr8 | 20106997 | 20111047 | 4051  | 0.02 | C_unshiu_01091 | 1      | 4071   | 4071  | 4.2   | 98.5  |
| chr8 | 20111396 | 20117845 | 6450  | 0.03 | C_unshiu_01091 | 4077   | 10525  | 6449  | 6.65  | 99.18 |
| chr8 | 20120675 | 20134352 | 13678 | 0.06 | C_unshiu_00589 | 53314  | 67000  | 13687 | 8.06  | 99.51 |
| chr8 | 20134526 | 20152636 | 18111 | 0.08 | C_unshiu_00589 | 67623  | 85746  | 18124 | 10.67 | 99.72 |
| chr8 | 20152763 | 20166570 | 13808 | 0.06 | C_unshiu_00589 | 85748  | 99575  | 13828 | 8.14  | 99.23 |
| chr8 | 20176804 | 20180059 | 3256  | 0.01 | C_unshiu_00589 | 106560 | 109816 | 3257  | 1.92  | 99.75 |
| chr8 | 20181666 | 20189951 | 8286  | 0.04 | C_unshiu_00016 | 106501 | 98236  | 8266  | 0.95  | 99.3  |
| chr8 | 20203853 | 20217090 | 13238 | 0.06 | C_unshiu_00589 | 125026 | 138229 | 13204 | 7.78  | 98.15 |
| chr8 | 20217548 | 20219211 | 1664  | 0.01 | C_unshiu_00589 | 138747 | 140420 | 1674  | 0.99  | 98.03 |
| chr8 | 20233612 | 20237181 | 3570  | 0.02 | C_unshiu_00589 | 152138 | 155707 | 3570  | 2.1   | 99.86 |
| chr8 | 20237174 | 20238980 | 1807  | 0.01 | C_unshiu_00485 | 74949  | 73143  | 1807  | 0.92  | 100   |
| chr8 | 20238981 | 20247102 | 8122  | 0.03 | C_unshiu_00630 | 138121 | 129994 | 8128  | 5.05  | 99.8  |
| chr8 | 20248652 | 20259861 | 11210 | 0.05 | C_unshiu_01911 | 15329  | 26545  | 11217 | 25.36 | 99.79 |
| chr8 | 20259860 | 20264044 | 4185  | 0.02 | C_unshiu_01911 | 26852  | 31036  | 4185  | 9.46  | 99.93 |
| chr8 | 20264044 | 20271285 | 7242  | 0.03 | C_unshiu_01911 | 32065  | 39330  | 7266  | 16.43 | 99.61 |
| chr8 | 20272057 | 20276497 | 4441  | 0.02 | C_unshiu_00630 | 110491 | 106030 | 4462  | 2.77  | 98.7  |
| chr8 | 20277705 | 20279883 | 2179  | 0.01 | C_unshiu_00630 | 104312 | 102127 | 2186  | 1.36  | 99.09 |
| chr8 | 20308539 | 20310006 | 1468  | 0.01 | C_unshiu_02622 | 15601  | 14133  | 1469  | 6.8   | 99.66 |
| chr8 | 20320849 | 20322370 | 1522  | 0.01 | C_unshiu_00775 | 102600 | 104121 | 1522  | 1.15  | 100   |
| chr8 | 20322359 | 20329735 | 7377  | 0.03 | C_unshiu_01391 | 10851  | 18228  | 7378  | 10.4  | 99.95 |
| chr8 | 20339393 | 20342379 | 2987  | 0.01 | C_unshiu_00497 | 171878 | 168883 | 2996  | 1.56  | 99.2  |
| chr8 | 20345238 | 20346556 | 1319  | 0.01 | C_unshiu_00497 | 167781 | 166460 | 1322  | 0.69  | 99.32 |
| chr8 | 20348012 | 20356415 | 8404  | 0.04 | C_unshiu_00497 | 164199 | 155804 | 8396  | 4.37  | 99.11 |
| chr8 | 20362427 | 20383479 | 21053 | 0.09 | C_unshiu_00497 | 151351 | 130256 | 21096 | 10.97 | 98.11 |
| chr8 | 20386407 | 20398329 | 11923 | 0.05 | C_unshiu_00497 | 126349 | 114451 | 11899 | 6.19  | 98.45 |
| chr8 | 20429515 | 20431704 | 2190  | 0.01 | C_unshiu_00497 | 89420  | 87232  | 2189  | 1.14  | 99.95 |
| chr8 | 20436698 | 20449089 | 12392 | 0.05 | C_unshiu_00497 | 82819  | 70412  | 12408 | 6.45  | 98.47 |
| chr8 | 20461338 | 20462517 | 1180  | 0    | C_unshiu_00497 | 55373  | 54194  | 1180  | 0.61  | 98.98 |
| chr8 | 20467164 | 20477348 | 10185 | 0.04 | C_unshiu_00497 | 53539  | 43331  | 10209 | 5.31  | 98.52 |
| chr8 | 20477350 | 20489430 | 12081 | 0.05 | C_unshiu_00497 | 43179  | 31022  | 12158 | 6.32  | 98.54 |
| chr8 | 20489429 | 20493174 | 3746  | 0.02 | C_unshiu_00497 | 31360  | 27598  | 3763  | 1.96  | 98.78 |
| chr8 | 20491682 | 20501291 | 9610  | 0.04 | C_unshiu_01315 | 1      | 9620   | 9620  | 12.67 | 99.44 |
| chr8 | 20501755 | 20507900 | 6146  | 0.03 | C_unshiu_01315 | 11260  | 17380  | 6121  | 8.06  | 99.28 |
| chr8 | 20509912 | 20520308 | 10397 | 0.04 | C_unshiu_00497 | 19167  | 8759   | 10409 | 5.41  | 99.43 |
| chr8 | 20524289 | 20527888 | 3600  | 0.02 | C_unshiu_00497 | 3904   | 309    | 3596  | 1.87  | 98.83 |
| chr8 | 20529207 | 20531140 | 1934  | 0.01 | C_unshiu_00827 | 1      | 1934   | 1934  | 1.54  | 99.07 |
| chr8 | 20532156 | 20540292 | 8137  | 0.03 | C_unshiu_01315 | 35442  | 43581  | 8140  | 10.72 | 98.23 |
| chr8 | 20550477 | 20553245 | 2769  | 0.01 | C_unshiu_00827 | 22305  | 25051  | 2747  | 2.19  | 98.77 |
| chr8 | 20553269 | 20554562 | 1294  | 0.01 | C_unshiu_00827 | 25470  | 26764  | 1295  | 1.03  | 99.77 |
| chr8 | 20564251 | 20566418 | 2168  | 0.01 | C_unshiu_00827 | 38202  | 40369  | 2168  | 1.73  | 99.54 |
| chr8 | 20568365 | 20569791 | 1427  | 0.01 | C_unshiu_00827 | 43274  | 44700  | 1427  | 1.14  | 99.93 |
| chr8 | 20573158 | 20574663 | 1506  | 0.01 | C_unshiu_01315 | 73378  | 74883  | 1506  | 1.98  | 99.47 |
| chr8 | 20579452 | 20588071 | 8620  | 0.04 | C_unshiu_00827 | 54228  | 62865  | 8638  | 6.89  | 98.21 |
| chr8 | 20588175 | 20593700 | 5526  | 0.02 | C_unshiu_00827 | 63001  | 68535  | 5535  | 4.41  | 98.16 |
| chr8 | 20593835 | 20617716 | 23882 | 0.1  | C_unshiu_00827 | 68547  | 92472  | 23926 | 19.07 | 98.58 |
| chr8 | 20613052 | 20620695 | 7644  | 0.03 | C_unshiu_00152 | 17     | 7666   | 7650  | 1.99  | 98.92 |
| chr8 | 20622587 | 20631399 | 8813  | 0.04 | C_unshiu_00152 | 9115   | 17938  | 8824  | 2.3   | 99.2  |
| chr8 | 20641245 | 20655169 | 13925 | 0.06 | C_unshiu_00152 | 26644  | 40557  | 13914 | 3.62  | 98.97 |
| chr8 | 20678009 | 20694582 | 16574 | 0.07 | C_unshiu_00152 | 62975  | 79592  | 16618 | 4.32  | 99.54 |
| chr8 | 20696209 | 20724366 | 28158 | 0.12 | C_unshiu_00152 | 81742  | 109898 | 28157 | 7.32  | 98.59 |
| chr8 | 20724515 | 20726145 | 1631  | 0.01 | C_unshiu_00152 | 110007 | 111626 | 1620  | 0.42  | 99.02 |
| chr8 | 20728491 | 20763606 | 35116 | 0.15 | C_unshiu_00152 | 114619 | 149599 | 34981 | 9.1   | 98.61 |
| chr8 | 20764214 | 20768216 | 4003  | 0.02 | C_unshiu_00152 | 149592 | 153588 | 3997  | 1.04  | 99.73 |
| chr8 | 20768291 | 20773575 | 5285  | 0.02 | C_unshiu_00152 | 153704 | 158992 | 5289  | 1.38  | 98.72 |
| chr8 | 20773835 | 20778675 | 4841  | 0.02 | C_unshiu_00152 | 159223 | 164075 | 4853  | 1.26  | 99.4  |
| chr8 | 20779074 | 20804545 | 25472 | 0.11 | C_unshiu_00152 | 164915 | 190451 | 25537 | 6.64  | 99.34 |
| chr8 | 20806845 | 20830663 | 23819 | 0.1  | C_unshiu_00152 | 191975 | 215682 | 23708 | 6.17  | 98.29 |
| chr8 | 20832349 | 20848050 | 15702 | 0.07 | C_unshiu_00152 | 218040 | 233718 | 15679 | 4.08  | 99.41 |
| chr8 | 20848049 | 20873751 | 25703 | 0.11 | C_unshiu_00152 | 234294 | 260045 | 25752 | 6.7   | 99.48 |
| chr8 | 20873783 | 20875780 | 1998  | 0.01 | C_unshiu_00152 | 262831 | 264820 | 1990  | 0.52  | 98.4  |
| chr8 | 20879053 | 20887228 | 8176  | 0.03 | C_unshiu_00152 | 264788 | 273032 | 8245  | 2.14  | 98.25 |
| chr8 | 20887228 | 20913415 | 26188 | 0.11 | C_unshiu_00152 | 273166 | 299445 | 26280 | 6.84  | 99.03 |

|      |          |          |        |      |                |        |        |        |       |       |
|------|----------|----------|--------|------|----------------|--------|--------|--------|-------|-------|
| chr8 | 20921551 | 20923131 | 1581   | 0.01 | C_unshiu_00064 | 482082 | 483662 | 1581   | 0.28  | 100   |
| chr8 | 20943415 | 20945509 | 2095   | 0.01 | C_unshiu_01040 | 96150  | 98245  | 2096   | 2.05  | 99.29 |
| chr8 | 20953443 | 20956637 | 3195   | 0.01 | C_unshiu_01365 | 23697  | 20503  | 3195   | 4.35  | 100   |
| chr8 | 20956638 | 20961185 | 4548   | 0.02 | C_unshiu_00363 | 45105  | 49656  | 4552   | 1.93  | 99.17 |
| chr8 | 20976245 | 20987067 | 10823  | 0.05 | C_unshiu_00363 | 62015  | 72894  | 10880  | 4.62  | 98.61 |
| chr8 | 20987380 | 20991440 | 4061   | 0.02 | C_unshiu_00363 | 73278  | 77336  | 4059   | 1.72  | 99.58 |
| chr8 | 20991497 | 21006802 | 15306  | 0.06 | C_unshiu_00363 | 77597  | 92882  | 15286  | 6.49  | 98.78 |
| chr8 | 21013377 | 21023541 | 10165  | 0.04 | C_unshiu_00363 | 99071  | 109220 | 10150  | 4.31  | 99.29 |
| chr8 | 21023782 | 21043570 | 19789  | 0.08 | C_unshiu_00363 | 109343 | 129147 | 19805  | 8.41  | 99.35 |
| chr8 | 21046434 | 21049658 | 3225   | 0.01 | C_unshiu_00363 | 131556 | 134783 | 3228   | 1.37  | 98.82 |
| chr8 | 21055270 | 21060613 | 5344   | 0.02 | C_unshiu_00363 | 140270 | 145613 | 5344   | 2.27  | 99.78 |
| chr8 | 21065299 | 21071255 | 5957   | 0.03 | C_unshiu_02227 | 13199  | 19155  | 5957   | 18.42 | 100   |
| chr8 | 21071336 | 21074633 | 3298   | 0.01 | C_unshiu_02227 | 20536  | 23835  | 3300   | 10.2  | 98.4  |
| chr8 | 21078587 | 21082023 | 3437   | 0.01 | C_unshiu_00363 | 149880 | 153336 | 3457   | 1.47  | 98.12 |
| chr8 | 21082016 | 21125354 | 43339  | 0.18 | C_unshiu_00363 | 154167 | 197561 | 43395  | 18.43 | 99.06 |
| chr8 | 21127318 | 21145706 | 18389  | 0.08 | C_unshiu_00363 | 198829 | 217268 | 18440  | 7.83  | 98.37 |
| chr8 | 21145702 | 21152115 | 6414   | 0.03 | C_unshiu_00363 | 217396 | 223716 | 6321   | 2.68  | 98.07 |
| chr8 | 21155316 | 21163876 | 8561   | 0.04 | C_unshiu_00104 | 289732 | 281139 | 8594   | 1.91  | 98.01 |
| chr8 | 21167896 | 21195719 | 27824  | 0.12 | C_unshiu_00024 | 18032  | 45880  | 27849  | 3.6   | 98.14 |
| chr8 | 21197627 | 21203905 | 6279   | 0.03 | C_unshiu_00024 | 48781  | 55067  | 6287   | 0.81  | 99.73 |
| chr8 | 21205450 | 21217587 | 12138  | 0.05 | C_unshiu_00024 | 55355  | 67509  | 12155  | 1.57  | 98.05 |
| chr8 | 21234725 | 21236300 | 1576   | 0.01 | C_unshiu_00024 | 83212  | 84792  | 1581   | 0.2   | 99.3  |
| chr8 | 21242126 | 21290058 | 47933  | 0.2  | C_unshiu_00024 | 85558  | 133694 | 48137  | 6.22  | 98.6  |
| chr8 | 21305608 | 21316218 | 10611  | 0.04 | C_unshiu_00024 | 150606 | 161245 | 10640  | 1.38  | 99.52 |
| chr8 | 21316328 | 21341101 | 24774  | 0.1  | C_unshiu_00024 | 161237 | 186013 | 24777  | 3.2   | 99.95 |
| chr8 | 21341101 | 21350101 | 9001   | 0.04 | C_unshiu_00024 | 186268 | 195270 | 9003   | 1.16  | 99.98 |
| chr8 | 21351279 | 21400680 | 49402  | 0.21 | C_unshiu_00024 | 195825 | 245193 | 49369  | 6.38  | 99.86 |
| chr8 | 21405508 | 21406663 | 1156   | 0    | C_unshiu_00024 | 248201 | 249355 | 1155   | 0.15  | 98.7  |
| chr8 | 21408122 | 21458470 | 50349  | 0.21 | C_unshiu_00024 | 251039 | 301342 | 50304  | 6.5   | 99.78 |
| chr8 | 21461266 | 21479307 | 18042  | 0.08 | C_unshiu_00024 | 306724 | 324732 | 18009  | 2.33  | 99.72 |
| chr8 | 21479615 | 21525676 | 46062  | 0.19 | C_unshiu_00024 | 324806 | 370841 | 46036  | 5.95  | 99.93 |
| chr8 | 21505681 | 21548654 | 42974  | 0.18 | C_unshiu_00024 | 350873 | 393799 | 42927  | 5.55  | 99.73 |
| chr8 | 21548685 | 21627425 | 78741  | 0.33 | C_unshiu_00024 | 394113 | 472804 | 78692  | 10.17 | 99.89 |
| chr8 | 21634317 | 21636595 | 2279   | 0.01 | C_unshiu_00024 | 502396 | 504682 | 2287   | 0.3   | 99.39 |
| chr8 | 21639938 | 21653131 | 13194  | 0.06 | C_unshiu_00024 | 472810 | 486035 | 13226  | 1.71  | 98.14 |
| chr8 | 21652864 | 21772099 | 119236 | 0.5  | C_unshiu_00024 | 507933 | 627183 | 119251 | 15.42 | 99.95 |
| chr8 | 21772117 | 21860441 | 88325  | 0.37 | C_unshiu_00024 | 627166 | 715585 | 88420  | 11.43 | 99.88 |
| chr8 | 21874344 | 21878830 | 4487   | 0.02 | C_unshiu_00116 | 48762  | 44279  | 4484   | 1.04  | 99.89 |
| chr8 | 21883604 | 21899476 | 15873  | 0.07 | C_unshiu_00116 | 39896  | 24047  | 15850  | 3.67  | 99.77 |
| chr8 | 21903017 | 21911785 | 8769   | 0.04 | C_unshiu_01780 | 11405  | 20154  | 8750   | 17.77 | 98.93 |
| chr8 | 21912124 | 21915360 | 3237   | 0.01 | C_unshiu_01780 | 21018  | 24265  | 3248   | 6.6   | 98.55 |
| chr8 | 21917060 | 21928267 | 11208  | 0.05 | C_unshiu_01780 | 28069  | 39283  | 11215  | 22.77 | 98.36 |
| chr8 | 21928298 | 21955892 | 27595  | 0.12 | C_unshiu_00735 | 125826 | 98098  | 27729  | 20.06 | 98.05 |
| chr8 | 21956010 | 21959416 | 3407   | 0.01 | C_unshiu_00735 | 97594  | 94181  | 3414   | 2.47  | 98.51 |
| chr8 | 21959414 | 21966347 | 6934   | 0.03 | C_unshiu_00735 | 94221  | 87265  | 6957   | 5.03  | 99.27 |
| chr8 | 22002714 | 22004862 | 2149   | 0.01 | C_unshiu_00735 | 52075  | 49923  | 2153   | 1.56  | 98.61 |
| chr8 | 22005889 | 22011435 | 5547   | 0.02 | C_unshiu_00735 | 47718  | 42132  | 5587   | 4.04  | 98.14 |
| chr8 | 22017968 | 22026110 | 8143   | 0.03 | C_unshiu_00735 | 30097  | 21955  | 8143   | 5.89  | 99.98 |
| chr8 | 22026133 | 22031140 | 5008   | 0.02 | C_unshiu_00735 | 20880  | 15872  | 5009   | 3.62  | 99.98 |
| chr8 | 22031143 | 22033039 | 1897   | 0.01 | C_unshiu_00818 | 107126 | 109034 | 1909   | 1.51  | 98.95 |
| chr8 | 22034384 | 22042253 | 7870   | 0.03 | C_unshiu_00818 | 110956 | 118912 | 7957   | 6.29  | 98.5  |
| chr8 | 22043779 | 22045300 | 1522   | 0.01 | C_unshiu_00818 | 121028 | 122549 | 1522   | 1.2   | 99.67 |
| chr8 | 22047436 | 22050934 | 3499   | 0.01 | C_unshiu_00024 | 749451 | 745950 | 3502   | 0.45  | 98.38 |
| chr8 | 22047891 | 22066102 | 18212  | 0.08 | C_unshiu_00024 | 769517 | 751308 | 18210  | 2.35  | 99.79 |
| chr8 | 22063718 | 22072863 | 9146   | 0.04 | C_unshiu_00116 | 25143  | 15980  | 9164   | 2.12  | 99.45 |
| chr8 | 22074501 | 22087333 | 12833  | 0.05 | C_unshiu_00116 | 15185  | 2353   | 12833  | 2.97  | 100   |
| chr8 | 22088560 | 22124188 | 35629  | 0.15 | C_unshiu_00650 | 149977 | 114358 | 35620  | 22.75 | 99.67 |
| chr8 | 22123244 | 22125380 | 2137   | 0.01 | C_unshiu_00024 | 752270 | 750121 | 2150   | 0.28  | 98.05 |
| chr8 | 22126817 | 22148518 | 21702  | 0.09 | C_unshiu_00024 | 748320 | 726631 | 21690  | 2.8   | 99.56 |
| chr8 | 22151277 | 22159710 | 8434   | 0.04 | C_unshiu_00024 | 725002 | 716544 | 8459   | 1.09  | 98.48 |
| chr8 | 22159711 | 22165559 | 5849   | 0.02 | C_unshiu_00116 | 54992  | 60837  | 5846   | 1.35  | 98.21 |
| chr8 | 22166154 | 22236217 | 70064  | 0.3  | C_unshiu_00116 | 62469  | 132526 | 70058  | 16.2  | 99.98 |
| chr8 | 22236224 | 22240987 | 4764   | 0.02 | C_unshiu_00116 | 132844 | 137606 | 4763   | 1.1   | 99.43 |
| chr8 | 22242238 | 22289529 | 47292  | 0.2  | C_unshiu_00116 | 139228 | 186518 | 47291  | 10.94 | 99.88 |
| chr8 | 22289309 | 22303799 | 14491  | 0.06 | C_unshiu_00116 | 190816 | 205306 | 14491  | 3.35  | 100   |
| chr8 | 22303861 | 22309575 | 5715   | 0.02 | C_unshiu_00116 | 205285 | 211024 | 5740   | 1.33  | 99.09 |
| chr8 | 22309120 | 22317128 | 8009   | 0.03 | C_unshiu_01909 | 9281   | 1274   | 8008   | 18.09 | 99.93 |
| chr8 | 22321229 | 22323817 | 2589   | 0.01 | C_unshiu_02416 | 20568  | 17986  | 2583   | 9.59  | 98.31 |
| chr8 | 22323799 | 22340983 | 17185  | 0.07 | C_unshiu_02416 | 17940  | 756    | 17185  | 63.8  | 100   |
| chr8 | 22355564 | 22362457 | 6894   | 0.03 | C_unshiu_00116 | 210898 | 217784 | 6887   | 1.59  | 99.72 |
| chr8 | 22362464 | 22452711 | 90248  | 0.38 | C_unshiu_00116 | 218386 | 308629 | 90244  | 20.87 | 99.96 |
| chr8 | 22455109 | 22462482 | 7374   | 0.03 | C_unshiu_00116 | 312294 | 319669 | 7376   | 1.71  | 99.91 |
| chr8 | 22462301 | 22473674 | 11374  | 0.05 | C_unshiu_00116 | 319549 | 330922 | 11374  | 2.63  | 99.97 |
| chr8 | 22473958 | 22531814 | 57857  | 0.24 | C_unshiu_00116 | 331362 | 389244 | 57883  | 13.38 | 99.87 |
| chr8 | 22535770 | 22543896 | 8127   | 0.03 | C_unshiu_00116 | 392697 | 400833 | 8137   | 1.88  | 99.03 |
| chr8 | 22548227 | 22554067 | 5841   | 0.02 | C_unshiu_00116 | 405212 | 411060 | 5849   | 1.35  | 98.58 |
| chr8 | 22555933 | 22566491 | 10559  | 0.04 | C_unshiu_00116 | 414821 | 425436 | 10616  | 2.45  | 98.8  |
| chr8 | 22566582 | 22573056 | 6475   | 0.03 | C_unshiu_00116 | 426002 | 432469 | 6468   | 1.5   | 98.92 |
| chr8 | 22615763 | 22641265 | 25503  | 0.11 | C_unshiu_00041 | 641741 | 616251 | 25491  | 3.88  | 99.17 |

|      |          |          |       |      |                |        |        |       |       |       |
|------|----------|----------|-------|------|----------------|--------|--------|-------|-------|-------|
| chr8 | 22643716 | 22651130 | 7415  | 0.03 | C_unshiu_00041 | 615598 | 608151 | 7448  | 1.13  | 98.07 |
| chr8 | 22651139 | 22674791 | 23653 | 0.1  | C_unshiu_00041 | 607754 | 584121 | 23634 | 3.59  | 98.64 |
| chr8 | 22678338 | 22683731 | 5394  | 0.02 | C_unshiu_00041 | 584378 | 578969 | 5410  | 0.82  | 98.97 |
| chr8 | 22688143 | 22689372 | 1230  | 0.01 | C_unshiu_00041 | 572952 | 571725 | 1228  | 0.19  | 98.46 |
| chr8 | 22718376 | 22724313 | 5938  | 0.03 | C_unshiu_00041 | 543274 | 537332 | 5943  | 0.9   | 98.77 |
| chr8 | 22747158 | 22752574 | 5417  | 0.02 | C_unshiu_00041 | 518461 | 513047 | 5415  | 0.82  | 98.02 |
| chr8 | 22755476 | 22757315 | 1840  | 0.01 | C_unshiu_00041 | 512034 | 510195 | 1840  | 0.28  | 99.84 |
| chr8 | 22761330 | 22770356 | 9027  | 0.04 | C_unshiu_00041 | 509715 | 500645 | 9071  | 1.38  | 98.89 |
| chr8 | 22770355 | 22781319 | 10965 | 0.05 | C_unshiu_00041 | 500611 | 489599 | 11013 | 1.67  | 98.85 |
| chr8 | 22784433 | 22790152 | 5720  | 0.02 | C_unshiu_00041 | 485818 | 480063 | 5756  | 0.88  | 98.47 |
| chr8 | 22801678 | 22803158 | 1481  | 0.01 | C_unshiu_00041 | 469271 | 467791 | 1481  | 0.23  | 98.79 |
| chr8 | 22803299 | 22807385 | 4087  | 0.02 | C_unshiu_00041 | 467229 | 463135 | 4095  | 0.62  | 98.2  |
| chr8 | 22807390 | 22818348 | 10959 | 0.05 | C_unshiu_00041 | 463042 | 452076 | 10967 | 1.67  | 98.69 |
| chr8 | 22819212 | 22821514 | 2303  | 0.01 | C_unshiu_00041 | 450520 | 448240 | 2281  | 0.35  | 98.22 |
| chr8 | 22821514 | 22841653 | 20140 | 0.09 | C_unshiu_00041 | 448078 | 427896 | 20183 | 3.07  | 99.26 |
| chr8 | 22841667 | 22846287 | 4621  | 0.02 | C_unshiu_00041 | 427611 | 422984 | 4628  | 0.7   | 99.44 |
| chr8 | 22905795 | 22907386 | 1592  | 0.01 | C_unshiu_00041 | 362294 | 360703 | 1592  | 0.24  | 99.87 |
| chr8 | 22906096 | 22916849 | 10754 | 0.05 | C_unshiu_03000 | 10750  | 1      | 10750 | 82.99 | 98.48 |
| chr8 | 22930921 | 22944250 | 13330 | 0.06 | C_unshiu_00041 | 334667 | 321302 | 13366 | 2.03  | 98.66 |
| chr8 | 22950974 | 22965469 | 14496 | 0.06 | C_unshiu_00041 | 313724 | 299192 | 14533 | 2.21  | 98.22 |
| chr8 | 22980915 | 22983717 | 2803  | 0.01 | C_unshiu_00041 | 283478 | 280656 | 2823  | 0.43  | 98.48 |
| chr8 | 22983713 | 22995047 | 11335 | 0.05 | C_unshiu_00041 | 279685 | 268349 | 11337 | 1.72  | 99.6  |
| chr8 | 22996994 | 23007542 | 10549 | 0.04 | C_unshiu_00041 | 266812 | 256200 | 10613 | 1.61  | 98.19 |
| chr8 | 23026256 | 23033081 | 6826  | 0.03 | C_unshiu_00041 | 238115 | 231286 | 6830  | 1.04  | 99.8  |
| chr8 | 23034751 | 23045918 | 11168 | 0.05 | C_unshiu_00041 | 228619 | 217349 | 11271 | 1.71  | 98.43 |
| chr8 | 23079237 | 23082794 | 3558  | 0.02 | C_unshiu_00041 | 185781 | 182206 | 3576  | 0.54  | 98.21 |
| chr8 | 23136265 | 23141857 | 5593  | 0.02 | C_unshiu_00041 | 126639 | 121050 | 5590  | 0.85  | 98.34 |
| chr8 | 23148511 | 23151866 | 3356  | 0.01 | C_unshiu_00041 | 114234 | 110876 | 3359  | 0.51  | 99.58 |
| chr8 | 23152097 | 23154352 | 2256  | 0.01 | C_unshiu_00041 | 110457 | 108211 | 2247  | 0.34  | 98.98 |
| chr8 | 23154924 | 23157621 | 2698  | 0.01 | C_unshiu_02466 | 21003  | 18307  | 2697  | 10.53 | 99.59 |
| chr8 | 23161041 | 23165776 | 4736  | 0.02 | C_unshiu_00041 | 92128  | 87392  | 4737  | 0.72  | 99.7  |
| chr8 | 23167485 | 23171736 | 4252  | 0.02 | C_unshiu_00041 | 99961  | 95702  | 4260  | 0.65  | 99.46 |
| chr8 | 23174813 | 23178212 | 3400  | 0.01 | C_unshiu_02466 | 1      | 3399   | 3399  | 13.27 | 98.1  |
| chr8 | 23178478 | 23180189 | 1712  | 0.01 | C_unshiu_02466 | 3573   | 5284   | 1712  | 6.68  | 99.71 |
| chr8 | 23184444 | 23188022 | 3579  | 0.02 | C_unshiu_00041 | 87027  | 83474  | 3554  | 0.54  | 98.16 |
| chr8 | 23192725 | 23202837 | 10113 | 0.04 | C_unshiu_00041 | 79121  | 68960  | 10162 | 1.54  | 98.51 |
| chr8 | 23203539 | 23212956 | 9418  | 0.04 | C_unshiu_00041 | 67965  | 58535  | 9431  | 1.43  | 99.06 |
| chr8 | 23213209 | 23215424 | 2216  | 0.01 | C_unshiu_00041 | 58547  | 56333  | 2215  | 0.34  | 98.87 |
| chr8 | 23222584 | 23226273 | 3690  | 0.02 | C_unshiu_00983 | 28192  | 24503  | 3690  | 3.41  | 100   |
| chr8 | 23240683 | 23250933 | 10251 | 0.04 | C_unshiu_00041 | 41125  | 30889  | 10237 | 1.56  | 98.02 |
| chr8 | 23267609 | 23281582 | 13974 | 0.06 | C_unshiu_00041 | 15159  | 1180   | 13980 | 2.13  | 98.93 |
| chr8 | 23312074 | 23327174 | 15101 | 0.06 | C_unshiu_01291 | 32650  | 17472  | 15179 | 19.41 | 98.92 |
| chr8 | 23327171 | 23329213 | 2043  | 0.01 | C_unshiu_00376 | 2291   | 4332   | 2042  | 0.88  | 98.73 |
| chr8 | 23332066 | 23341626 | 9561  | 0.04 | C_unshiu_01291 | 13346  | 3753   | 9594  | 12.27 | 98.35 |
| chr8 | 23341971 | 23344827 | 2857  | 0.01 | C_unshiu_00376 | 18074  | 20926  | 2853  | 1.23  | 99.51 |
| chr8 | 23344866 | 23346190 | 1325  | 0.01 | C_unshiu_00376 | 16829  | 18159  | 1331  | 0.58  | 99.02 |
| chr8 | 23344866 | 23346190 | 1325  | 0.01 | C_unshiu_01291 | 4214   | 2883   | 1332  | 1.7   | 99.25 |
| chr8 | 23347769 | 23395551 | 47783 | 0.2  | C_unshiu_00376 | 20528  | 68401  | 47874 | 20.69 | 98.84 |
| chr8 | 23413099 | 23415783 | 2685  | 0.01 | C_unshiu_00376 | 85566  | 88252  | 2687  | 1.16  | 98.55 |
| chr8 | 23418177 | 23419477 | 1301  | 0.01 | C_unshiu_00376 | 94481  | 95781  | 1301  | 0.56  | 100   |
| chr8 | 23420393 | 23421884 | 1492  | 0.01 | C_unshiu_00376 | 92914  | 94405  | 1492  | 0.64  | 99.53 |
| chr8 | 23427015 | 23428757 | 1743  | 0.01 | C_unshiu_00376 | 101201 | 102950 | 1750  | 0.76  | 98.97 |
| chr8 | 23445196 | 23466984 | 21789 | 0.09 | C_unshiu_00376 | 114796 | 136732 | 21937 | 9.48  | 98.12 |
| chr8 | 23489522 | 23503197 | 13676 | 0.06 | C_unshiu_00376 | 159190 | 172871 | 13682 | 5.91  | 98.19 |
| chr8 | 23503218 | 23517546 | 14329 | 0.06 | C_unshiu_00376 | 173498 | 187888 | 14391 | 6.22  | 98.92 |
| chr8 | 23517945 | 23522404 | 4460  | 0.02 | C_unshiu_00376 | 188823 | 193299 | 4477  | 1.93  | 98.57 |
| chr8 | 23540138 | 23543671 | 3534  | 0.01 | C_unshiu_01137 | 3585   | 7117   | 3533  | 3.83  | 98.25 |
| chr8 | 23540337 | 23545007 | 4671  | 0.02 | C_unshiu_00376 | 209770 | 214516 | 4747  | 2.05  | 98.08 |
| chr8 | 23545980 | 23549199 | 3220  | 0.01 | C_unshiu_00376 | 216320 | 219521 | 3202  | 1.38  | 99.13 |
| chr8 | 23552716 | 23555875 | 3160  | 0.01 | C_unshiu_00376 | 221571 | 224738 | 3168  | 1.37  | 98.33 |
| chr8 | 23562337 | 23573760 | 11424 | 0.05 | C_unshiu_01137 | 25864  | 37363  | 11500 | 12.47 | 98.42 |
| chr8 | 23579446 | 23586295 | 6850  | 0.03 | C_unshiu_01137 | 41290  | 48145  | 6856  | 7.44  | 99.18 |
| chr8 | 23599786 | 23603559 | 3774  | 0.02 | C_unshiu_01137 | 56434  | 60206  | 3773  | 4.09  | 99.31 |
| chr8 | 23636968 | 23647067 | 10100 | 0.04 | C_unshiu_01168 | 33771  | 43838  | 10068 | 11.37 | 98.76 |
| chr9 | 14859    | 15892    | 1034  | 0.01 | C_unshiu_00620 | 6480   | 5449   | 1032  | 0.63  | 98.45 |
| chr9 | 20486    | 32453    | 11968 | 0.08 | C_unshiu_01012 | 45379  | 33372  | 12008 | 11.47 | 98.4  |
| chr9 | 34059    | 39851    | 5793  | 0.04 | C_unshiu_01012 | 32613  | 26818  | 5796  | 5.53  | 99.79 |
| chr9 | 40054    | 48368    | 8315  | 0.06 | C_unshiu_01012 | 25115  | 16792  | 8324  | 7.95  | 99.5  |
| chr9 | 55101    | 62487    | 7387  | 0.05 | C_unshiu_01012 | 12510  | 5115   | 7396  | 7.06  | 99.31 |
| chr9 | 68827    | 84062    | 15236 | 0.11 | C_unshiu_01264 | 72501  | 57260  | 15242 | 19.11 | 99.67 |
| chr9 | 90420    | 107379   | 16960 | 0.12 | C_unshiu_01264 | 51079  | 34097  | 16983 | 21.29 | 99.29 |
| chr9 | 109741   | 122624   | 12884 | 0.09 | C_unshiu_01264 | 33096  | 20202  | 12895 | 16.16 | 98.48 |
| chr9 | 123745   | 130939   | 7195  | 0.05 | C_unshiu_01264 | 19867  | 12699  | 7169  | 8.99  | 98.71 |
| chr9 | 130965   | 133490   | 2526  | 0.02 | C_unshiu_01264 | 12511  | 9986   | 2526  | 3.17  | 100   |
| chr9 | 133487   | 141634   | 8148  | 0.06 | C_unshiu_01264 | 9929   | 1768   | 8162  | 10.23 | 99.13 |
| chr9 | 145662   | 147880   | 2219  | 0.02 | C_unshiu_02326 | 2226   | 4      | 2223  | 7.65  | 99.64 |
| chr9 | 145852   | 160894   | 15043 | 0.1  | C_unshiu_02700 | 1      | 14979  | 14979 | 75.43 | 98.96 |
| chr9 | 161070   | 164225   | 3156  | 0.02 | C_unshiu_02700 | 15349  | 18486  | 3138  | 15.8  | 99.33 |
| chr9 | 163018   | 171342   | 8325  | 0.06 | C_unshiu_00015 | 806561 | 814943 | 8383  | 0.95  | 98.02 |

|      |         |         |       |      |                |        |        |       |       |       |
|------|---------|---------|-------|------|----------------|--------|--------|-------|-------|-------|
| chr9 | 173031  | 177412  | 4382  | 0.03 | C_unshiu_00551 | 896    | 5274   | 4379  | 2.45  | 99.41 |
| chr9 | 187891  | 198832  | 10942 | 0.08 | C_unshiu_00551 | 14168  | 25106  | 10939 | 6.13  | 99    |
| chr9 | 190099  | 198832  | 8734  | 0.06 | C_unshiu_00015 | 833465 | 842211 | 8747  | 1     | 98.87 |
| chr9 | 198944  | 200337  | 1394  | 0.01 | C_unshiu_00015 | 842637 | 844027 | 1391  | 0.16  | 98.92 |
| chr9 | 200691  | 204700  | 4010  | 0.03 | C_unshiu_00737 | 131008 | 135006 | 3999  | 2.9   | 98.29 |
| chr9 | 215695  | 218054  | 2360  | 0.02 | C_unshiu_00750 | 45932  | 43573  | 2360  | 1.73  | 100   |
| chr9 | 228484  | 229890  | 1407  | 0.01 | C_unshiu_01913 | 32451  | 33855  | 1405  | 3.18  | 99.36 |
| chr9 | 229887  | 233375  | 3489  | 0.02 | C_unshiu_01913 | 33531  | 37030  | 3500  | 7.92  | 99.37 |
| chr9 | 233371  | 235668  | 2298  | 0.02 | C_unshiu_00249 | 93104  | 90807  | 2298  | 0.78  | 100   |
| chr9 | 234244  | 235675  | 1432  | 0.01 | C_unshiu_00722 | 131744 | 130313 | 1432  | 1.01  | 100   |
| chr9 | 235699  | 237191  | 1493  | 0.01 | C_unshiu_01913 | 39755  | 41247  | 1493  | 3.38  | 99.6  |
| chr9 | 237812  | 239208  | 1397  | 0.01 | C_unshiu_01913 | 42308  | 43704  | 1397  | 3.16  | 100   |
| chr9 | 257955  | 260489  | 2535  | 0.02 | C_unshiu_01455 | 45444  | 42910  | 2535  | 3.83  | 100   |
| chr9 | 260547  | 262197  | 1651  | 0.01 | C_unshiu_01600 | 50297  | 48647  | 1651  | 2.87  | 100   |
| chr9 | 274931  | 276118  | 1188  | 0.01 | C_unshiu_01600 | 36638  | 35451  | 1188  | 2.07  | 99.66 |
| chr9 | 278465  | 283740  | 5276  | 0.04 | C_unshiu_01600 | 32562  | 27270  | 5293  | 9.21  | 98.28 |
| chr9 | 282941  | 287080  | 4140  | 0.03 | C_unshiu_01101 | 8611   | 12761  | 4151  | 4.32  | 98.43 |
| chr9 | 294172  | 295404  | 1233  | 0.01 | C_unshiu_01600 | 6336   | 7569   | 1234  | 2.15  | 99.92 |
| chr9 | 298366  | 303974  | 5609  | 0.04 | C_unshiu_01101 | 21950  | 27559  | 5610  | 5.84  | 98.93 |
| chr9 | 307374  | 310465  | 3092  | 0.02 | C_unshiu_01944 | 23093  | 20002  | 3092  | 7.2   | 100   |
| chr9 | 323150  | 336728  | 13579 | 0.09 | C_unshiu_01101 | 36851  | 50429  | 13579 | 14.14 | 98.71 |
| chr9 | 331241  | 336735  | 5495  | 0.04 | C_unshiu_02305 | 29695  | 24188  | 5508  | 18.55 | 99.29 |
| chr9 | 337906  | 341706  | 3801  | 0.03 | C_unshiu_01265 | 73861  | 77661  | 3801  | 4.76  | 99.63 |
| chr9 | 342506  | 344580  | 2075  | 0.01 | C_unshiu_02305 | 21245  | 19171  | 2075  | 6.99  | 100   |
| chr9 | 345561  | 347208  | 1648  | 0.01 | C_unshiu_02305 | 17807  | 16160  | 1648  | 5.55  | 100   |
| chr9 | 352015  | 354760  | 2746  | 0.02 | C_unshiu_02305 | 12822  | 10079  | 2744  | 9.24  | 98.47 |
| chr9 | 355955  | 357164  | 1210  | 0.01 | C_unshiu_01101 | 67453  | 68662  | 1210  | 1.26  | 99.67 |
| chr9 | 357937  | 360366  | 2430  | 0.02 | C_unshiu_01101 | 69746  | 72179  | 2434  | 2.53  | 99.79 |
| chr9 | 360386  | 364860  | 4475  | 0.03 | C_unshiu_01101 | 72513  | 76987  | 4475  | 4.66  | 99.78 |
| chr9 | 365607  | 370716  | 5110  | 0.04 | C_unshiu_01101 | 77696  | 82800  | 5105  | 5.32  | 99.45 |
| chr9 | 374586  | 380012  | 5427  | 0.04 | C_unshiu_00443 | 121857 | 127298 | 5442  | 2.59  | 98.75 |
| chr9 | 383332  | 384647  | 1316  | 0.01 | C_unshiu_00443 | 132849 | 134169 | 1321  | 0.63  | 98.94 |
| chr9 | 385214  | 387529  | 2316  | 0.02 | C_unshiu_01265 | 64334  | 66648  | 2315  | 2.9   | 99.96 |
| chr9 | 389234  | 398644  | 9411  | 0.07 | C_unshiu_00443 | 134089 | 143501 | 9413  | 4.47  | 99.75 |
| chr9 | 398938  | 401016  | 2079  | 0.01 | C_unshiu_00443 | 143814 | 145893 | 2080  | 0.99  | 98.94 |
| chr9 | 413390  | 432345  | 18956 | 0.13 | C_unshiu_01171 | 1249   | 20231  | 18983 | 21.49 | 99.03 |
| chr9 | 452769  | 454688  | 1920  | 0.01 | C_unshiu_01217 | 13752  | 11833  | 1920  | 2.29  | 100   |
| chr9 | 464025  | 465674  | 1650  | 0.01 | C_unshiu_00606 | 147153 | 145504 | 1650  | 1     | 98.91 |
| chr9 | 466061  | 468230  | 2170  | 0.02 | C_unshiu_00606 | 144661 | 142490 | 2172  | 1.31  | 99.31 |
| chr9 | 476282  | 496268  | 19987 | 0.14 | C_unshiu_00606 | 135819 | 115818 | 20002 | 12.08 | 98.44 |
| chr9 | 496892  | 513333  | 16442 | 0.11 | C_unshiu_00606 | 114985 | 98669  | 16317 | 9.86  | 98.62 |
| chr9 | 514856  | 516767  | 1912  | 0.01 | C_unshiu_00606 | 97742  | 95831  | 1912  | 1.15  | 100   |
| chr9 | 519273  | 521013  | 1741  | 0.01 | C_unshiu_00056 | 15635  | 13894  | 1742  | 0.29  | 99.94 |
| chr9 | 526906  | 529674  | 2769  | 0.02 | C_unshiu_00606 | 86106  | 83338  | 2769  | 1.67  | 98.45 |
| chr9 | 528870  | 531644  | 2775  | 0.02 | C_unshiu_00606 | 81717  | 78943  | 2775  | 1.68  | 99.93 |
| chr9 | 532579  | 534577  | 1999  | 0.01 | C_unshiu_00606 | 76254  | 74258  | 1997  | 1.21  | 99.65 |
| chr9 | 534712  | 536920  | 2209  | 0.02 | C_unshiu_00606 | 74097  | 71889  | 2209  | 1.33  | 99.86 |
| chr9 | 537870  | 544138  | 6269  | 0.04 | C_unshiu_00606 | 50430  | 44173  | 6258  | 3.78  | 99.43 |
| chr9 | 545003  | 546612  | 1610  | 0.01 | C_unshiu_00606 | 44645  | 43037  | 1609  | 0.97  | 99.32 |
| chr9 | 562056  | 565940  | 3885  | 0.03 | C_unshiu_00606 | 30938  | 27062  | 3877  | 2.34  | 99.15 |
| chr9 | 567599  | 569345  | 1747  | 0.01 | C_unshiu_00606 | 27064  | 25315  | 1750  | 1.06  | 99.2  |
| chr9 | 573667  | 592080  | 18414 | 0.13 | C_unshiu_00606 | 22681  | 4201   | 18481 | 11.16 | 98.85 |
| chr9 | 592838  | 598398  | 5561  | 0.04 | C_unshiu_01221 | 15292  | 20870  | 5579  | 6.68  | 99.03 |
| chr9 | 598417  | 611648  | 13232 | 0.09 | C_unshiu_01221 | 23573  | 36761  | 13189 | 15.8  | 98.31 |
| chr9 | 611648  | 614083  | 2436  | 0.02 | C_unshiu_01221 | 36862  | 39296  | 2435  | 2.92  | 98.98 |
| chr9 | 614936  | 634834  | 19899 | 0.14 | C_unshiu_01221 | 40210  | 60011  | 19802 | 23.72 | 98.13 |
| chr9 | 635854  | 656415  | 20562 | 0.14 | C_unshiu_01221 | 60840  | 81300  | 20461 | 24.51 | 98.79 |
| chr9 | 669633  | 672392  | 2760  | 0.02 | C_unshiu_01810 | 12947  | 15735  | 2789  | 5.78  | 98.64 |
| chr9 | 676718  | 695083  | 18366 | 0.13 | C_unshiu_01810 | 15729  | 34148  | 18420 | 38.21 | 99.45 |
| chr9 | 700604  | 704061  | 3458  | 0.02 | C_unshiu_01222 | 4935   | 8419   | 3485  | 4.18  | 98.82 |
| chr9 | 704740  | 707302  | 2563  | 0.02 | C_unshiu_00995 | 66264  | 63702  | 2563  | 2.4   | 100   |
| chr9 | 708676  | 745602  | 36927 | 0.26 | C_unshiu_01222 | 11952  | 48900  | 36949 | 44.32 | 99.46 |
| chr9 | 745559  | 769031  | 23473 | 0.16 | C_unshiu_01222 | 48907  | 72432  | 23526 | 28.22 | 98.69 |
| chr9 | 770917  | 775890  | 4974  | 0.03 | C_unshiu_00045 | 636851 | 631871 | 4981  | 0.78  | 98.78 |
| chr9 | 775552  | 793444  | 17893 | 0.12 | C_unshiu_00045 | 632030 | 614094 | 17937 | 2.82  | 99.02 |
| chr9 | 793429  | 800617  | 7189  | 0.05 | C_unshiu_00045 | 608590 | 601405 | 7186  | 1.13  | 99.5  |
| chr9 | 802074  | 805514  | 3441  | 0.02 | C_unshiu_00045 | 599563 | 596118 | 3446  | 0.54  | 99.07 |
| chr9 | 805875  | 821614  | 15740 | 0.11 | C_unshiu_00045 | 596120 | 580342 | 15779 | 2.48  | 99.48 |
| chr9 | 821506  | 826568  | 5063  | 0.04 | C_unshiu_00045 | 580342 | 575281 | 5062  | 0.79  | 99.55 |
| chr9 | 827713  | 829418  | 1706  | 0.01 | C_unshiu_00045 | 570004 | 568305 | 1700  | 0.27  | 98.3  |
| chr9 | 832383  | 834409  | 2027  | 0.01 | C_unshiu_00045 | 569678 | 567636 | 2043  | 0.32  | 98.09 |
| chr9 | 835909  | 876109  | 40201 | 0.28 | C_unshiu_00045 | 567720 | 527384 | 40337 | 6.33  | 98.85 |
| chr9 | 885684  | 892765  | 7082  | 0.05 | C_unshiu_00045 | 517332 | 510239 | 7094  | 1.11  | 99.2  |
| chr9 | 908052  | 916533  | 8482  | 0.06 | C_unshiu_00045 | 509770 | 501284 | 8487  | 1.33  | 99.12 |
| chr9 | 916551  | 926582  | 10032 | 0.07 | C_unshiu_00045 | 501026 | 490989 | 10038 | 1.58  | 99.5  |
| chr9 | 926427  | 928177  | 1751  | 0.01 | C_unshiu_00045 | 490985 | 489233 | 1753  | 0.28  | 98.23 |
| chr9 | 932663  | 983068  | 50406 | 0.35 | C_unshiu_00045 | 484954 | 434429 | 50526 | 7.93  | 99.11 |
| chr9 | 984964  | 998540  | 13577 | 0.09 | C_unshiu_00045 | 433107 | 419514 | 13594 | 2.13  | 99.34 |
| chr9 | 1000837 | 1013023 | 12187 | 0.09 | C_unshiu_00045 | 416723 | 404512 | 12212 | 1.92  | 99.54 |

|      |         |         |       |      |                |        |        |       |       |       |
|------|---------|---------|-------|------|----------------|--------|--------|-------|-------|-------|
| chr9 | 1014381 | 1031660 | 17280 | 0.12 | C_unshiu_00045 | 402029 | 384708 | 17322 | 2.72  | 99.32 |
| chr9 | 1033010 | 1040906 | 7897  | 0.06 | C_unshiu_00045 | 384716 | 376817 | 7900  | 1.24  | 99.32 |
| chr9 | 1042214 | 1044003 | 1790  | 0.01 | C_unshiu_00045 | 374877 | 373088 | 1790  | 0.28  | 99.5  |
| chr9 | 1044161 | 1053528 | 9368  | 0.07 | C_unshiu_00045 | 372697 | 363281 | 9417  | 1.48  | 98.15 |
| chr9 | 1059118 | 1095470 | 36353 | 0.25 | C_unshiu_00045 | 354644 | 318238 | 36407 | 5.72  | 99.19 |
| chr9 | 1096145 | 1103510 | 7366  | 0.05 | C_unshiu_00045 | 317897 | 310478 | 7420  | 1.17  | 98.87 |
| chr9 | 1105766 | 1111176 | 5411  | 0.04 | C_unshiu_00045 | 309673 | 304279 | 5395  | 0.85  | 98.14 |
| chr9 | 1113114 | 1115249 | 2136  | 0.01 | C_unshiu_00045 | 300478 | 298343 | 2136  | 0.34  | 99.58 |
| chr9 | 1115660 | 1117974 | 2315  | 0.02 | C_unshiu_00045 | 297919 | 295592 | 2328  | 0.37  | 98.8  |
| chr9 | 1117966 | 1119668 | 1703  | 0.01 | C_unshiu_00045 | 295384 | 293688 | 1697  | 0.27  | 99.12 |
| chr9 | 1120680 | 1123150 | 2471  | 0.02 | C_unshiu_00045 | 292288 | 289818 | 2471  | 0.39  | 99.68 |
| chr9 | 1128081 | 1145725 | 17645 | 0.12 | C_unshiu_00045 | 285448 | 267753 | 17696 | 2.78  | 98.16 |
| chr9 | 1145711 | 1168507 | 22797 | 0.16 | C_unshiu_00045 | 267805 | 244925 | 22881 | 3.59  | 99.26 |
| chr9 | 1168502 | 1188673 | 20172 | 0.14 | C_unshiu_00045 | 242484 | 222277 | 20208 | 3.17  | 99.29 |
| chr9 | 1189529 | 1202017 | 12489 | 0.09 | C_unshiu_00045 | 221085 | 208547 | 12539 | 1.97  | 98.51 |
| chr9 | 1202009 | 1234142 | 32134 | 0.22 | C_unshiu_00045 | 207988 | 175603 | 32386 | 5.09  | 98.05 |
| chr9 | 1234130 | 1289947 | 55818 | 0.39 | C_unshiu_00045 | 175404 | 119511 | 55894 | 8.78  | 99.25 |
| chr9 | 1294254 | 1311731 | 17478 | 0.12 | C_unshiu_00045 | 120238 | 102708 | 17531 | 2.75  | 99.57 |
| chr9 | 1312922 | 1314870 | 1949  | 0.01 | C_unshiu_00045 | 100685 | 98734  | 1952  | 0.31  | 99.39 |
| chr9 | 1316173 | 1326625 | 10453 | 0.07 | C_unshiu_00045 | 98739  | 88239  | 10501 | 1.65  | 99.27 |
| chr9 | 1326617 | 1330302 | 3686  | 0.03 | C_unshiu_00045 | 88146  | 84450  | 3697  | 0.58  | 99.11 |
| chr9 | 1332418 | 1345640 | 13223 | 0.09 | C_unshiu_00045 | 82295  | 69090  | 13206 | 2.07  | 99.12 |
| chr9 | 1345632 | 1350783 | 5152  | 0.04 | C_unshiu_00045 | 68423  | 63265  | 5159  | 0.81  | 99.26 |
| chr9 | 1352239 | 1376041 | 23803 | 0.17 | C_unshiu_00045 | 61766  | 37983  | 23784 | 3.73  | 98.21 |
| chr9 | 1376041 | 1391441 | 15401 | 0.11 | C_unshiu_00045 | 37619  | 22223  | 15397 | 2.42  | 98.8  |
| chr9 | 1392028 | 1394977 | 2950  | 0.02 | C_unshiu_00045 | 22221  | 19271  | 2951  | 0.46  | 99.63 |
| chr9 | 1394978 | 1407780 | 12803 | 0.09 | C_unshiu_00045 | 19307  | 6500   | 12808 | 2.01  | 98.94 |
| chr9 | 1408375 | 1414723 | 6349  | 0.04 | C_unshiu_01380 | 68474  | 62120  | 6355  | 8.88  | 99.4  |
| chr9 | 1414923 | 1424079 | 9157  | 0.06 | C_unshiu_01380 | 61936  | 52718  | 9219  | 12.89 | 98.87 |
| chr9 | 1424078 | 1427876 | 3799  | 0.03 | C_unshiu_01380 | 45182  | 48981  | 3800  | 5.31  | 99.92 |
| chr9 | 1427440 | 1437083 | 9644  | 0.07 | C_unshiu_01380 | 43785  | 34117  | 9669  | 13.51 | 99.35 |
| chr9 | 1437075 | 1456574 | 19500 | 0.14 | C_unshiu_01380 | 33965  | 14433  | 19533 | 27.3  | 99.6  |
| chr9 | 1459625 | 1469556 | 9932  | 0.07 | C_unshiu_01380 | 12635  | 2700   | 9936  | 13.89 | 99.55 |
| chr9 | 1469573 | 1471925 | 2353  | 0.02 | C_unshiu_01380 | 2351   | 1      | 2351  | 3.29  | 99.41 |
| chr9 | 1476905 | 1478490 | 1586  | 0.01 | C_unshiu_01050 | 8139   | 9735   | 1597  | 1.6   | 99    |
| chr9 | 1486697 | 1489941 | 3245  | 0.02 | C_unshiu_01809 | 4835   | 1612   | 3224  | 6.69  | 98.71 |
| chr9 | 1503982 | 1505471 | 1490  | 0.01 | C_unshiu_01809 | 19391  | 20883  | 1493  | 3.1   | 99.73 |
| chr9 | 1505629 | 1519102 | 13474 | 0.09 | C_unshiu_01809 | 23573  | 37067  | 13495 | 27.99 | 99.44 |
| chr9 | 1519090 | 1524775 | 5686  | 0.04 | C_unshiu_01809 | 36985  | 42666  | 5682  | 11.78 | 99.21 |
| chr9 | 1529306 | 1530722 | 1417  | 0.01 | C_unshiu_01809 | 46792  | 48214  | 1423  | 2.95  | 99.44 |
| chr9 | 1529308 | 1567504 | 38197 | 0.27 | C_unshiu_01050 | 31187  | 69409  | 38223 | 38.21 | 98.78 |
| chr9 | 1567715 | 1571409 | 3695  | 0.03 | C_unshiu_01050 | 77194  | 73466  | 3729  | 3.73  | 98.42 |
| chr9 | 1576237 | 1590743 | 14507 | 0.1  | C_unshiu_00181 | 84477  | 98894  | 14418 | 4.04  | 98.97 |
| chr9 | 1590754 | 1597218 | 6465  | 0.05 | C_unshiu_00181 | 99190  | 105679 | 6490  | 1.82  | 99.29 |
| chr9 | 1597365 | 1600322 | 2958  | 0.02 | C_unshiu_00181 | 106013 | 108991 | 2979  | 0.83  | 98.99 |
| chr9 | 1600346 | 1611870 | 11525 | 0.08 | C_unshiu_00181 | 109282 | 120856 | 11575 | 3.24  | 99.28 |
| chr9 | 1617076 | 1629648 | 12573 | 0.09 | C_unshiu_00181 | 121647 | 134249 | 12603 | 3.53  | 99.34 |
| chr9 | 1629640 | 1632413 | 2774  | 0.02 | C_unshiu_00181 | 135432 | 138197 | 2766  | 0.77  | 99.03 |
| chr9 | 1632835 | 1633939 | 1105  | 0.01 | C_unshiu_00181 | 138692 | 139795 | 1104  | 0.31  | 99.82 |
| chr9 | 1634022 | 1635407 | 1386  | 0.01 | C_unshiu_00181 | 139908 | 141293 | 1386  | 0.39  | 99.42 |
| chr9 | 1635491 | 1637134 | 1644  | 0.01 | C_unshiu_00181 | 141429 | 143075 | 1647  | 0.46  | 98.72 |
| chr9 | 1637233 | 1646643 | 9411  | 0.07 | C_unshiu_02234 | 668    | 10162  | 9495  | 29.56 | 98.33 |
| chr9 | 1661732 | 1663530 | 1799  | 0.01 | C_unshiu_02234 | 25966  | 27764  | 1799  | 5.6   | 99.33 |
| chr9 | 1667255 | 1706902 | 39648 | 0.28 | C_unshiu_00182 | 352518 | 312916 | 39603 | 11.11 | 99.43 |
| chr9 | 1706972 | 1709370 | 2399  | 0.02 | C_unshiu_00182 | 312919 | 310521 | 2399  | 0.67  | 100   |
| chr9 | 1709313 | 1733497 | 24185 | 0.17 | C_unshiu_00182 | 310478 | 286263 | 24216 | 6.79  | 99.47 |
| chr9 | 1730503 | 1734885 | 4383  | 0.03 | C_unshiu_01194 | 86253  | 81884  | 4370  | 5.07  | 98.97 |
| chr9 | 1735471 | 1739791 | 4321  | 0.03 | C_unshiu_01194 | 79553  | 75227  | 4327  | 5.02  | 98.36 |
| chr9 | 1747213 | 1754302 | 7090  | 0.05 | C_unshiu_00182 | 273175 | 266064 | 7112  | 1.99  | 98.47 |
| chr9 | 1758737 | 1766679 | 7943  | 0.06 | C_unshiu_00182 | 258641 | 250672 | 7970  | 2.24  | 99.21 |
| chr9 | 1766735 | 1786895 | 20161 | 0.14 | C_unshiu_00182 | 250675 | 230458 | 20218 | 5.67  | 98.65 |
| chr9 | 1787593 | 1795095 | 7503  | 0.05 | C_unshiu_00182 | 230466 | 222953 | 7514  | 2.11  | 99.52 |
| chr9 | 1795561 | 1799615 | 4055  | 0.03 | C_unshiu_00182 | 222946 | 218908 | 4039  | 1.13  | 98.87 |
| chr9 | 1799697 | 1862897 | 63201 | 0.44 | C_unshiu_00182 | 218755 | 155503 | 63253 | 17.74 | 99.21 |
| chr9 | 1865102 | 1873626 | 8525  | 0.06 | C_unshiu_00182 | 155272 | 146747 | 8526  | 2.39  | 99.55 |
| chr9 | 1885725 | 1888481 | 2757  | 0.02 | C_unshiu_00182 | 136098 | 133342 | 2757  | 0.77  | 99.64 |
| chr9 | 1889057 | 1895520 | 6464  | 0.05 | C_unshiu_00182 | 127637 | 121192 | 6446  | 1.81  | 98.44 |
| chr9 | 1910173 | 1925479 | 15307 | 0.11 | C_unshiu_00182 | 106324 | 91033  | 15292 | 4.29  | 99.03 |
| chr9 | 1926006 | 1929874 | 3869  | 0.03 | C_unshiu_00182 | 90703  | 86812  | 3892  | 1.09  | 98.59 |
| chr9 | 1929969 | 1934819 | 4851  | 0.03 | C_unshiu_00182 | 86816  | 81950  | 4867  | 1.36  | 99.45 |
| chr9 | 1935131 | 1937520 | 2390  | 0.02 | C_unshiu_00182 | 81393  | 78986  | 2408  | 0.68  | 98.42 |
| chr9 | 1938160 | 1946714 | 8555  | 0.06 | C_unshiu_00182 | 78326  | 69815  | 8512  | 2.39  | 98.02 |
| chr9 | 1947562 | 1969277 | 21716 | 0.15 | C_unshiu_00182 | 69060  | 47300  | 21761 | 6.1   | 99.37 |
| chr9 | 1978429 | 1980880 | 2452  | 0.02 | C_unshiu_00182 | 36376  | 33906  | 2471  | 0.69  | 98.3  |
| chr9 | 1982905 | 1987650 | 4746  | 0.03 | C_unshiu_00182 | 31894  | 27144  | 4751  | 1.33  | 99.6  |
| chr9 | 1989832 | 1998906 | 9075  | 0.06 | C_unshiu_00182 | 24373  | 15285  | 9089  | 2.55  | 98.2  |
| chr9 | 2007433 | 2014336 | 6904  | 0.05 | C_unshiu_00252 | 1      | 6921   | 6921  | 2.35  | 98.85 |
| chr9 | 2014661 | 2016827 | 2167  | 0.02 | C_unshiu_00252 | 7178   | 9349   | 2172  | 0.74  | 98.12 |
| chr9 | 2020944 | 2058875 | 37932 | 0.26 | C_unshiu_00252 | 15302  | 53291  | 37990 | 12.88 | 99.53 |

|      |         |         |        |      |                |        |        |        |       |       |
|------|---------|---------|--------|------|----------------|--------|--------|--------|-------|-------|
| chr9 | 2058872 | 2066929 | 8058   | 0.06 | C_unshiu_00252 | 54002  | 62064  | 8063   | 2.73  | 99.65 |
| chr9 | 2068198 | 2081039 | 12842  | 0.09 | C_unshiu_00252 | 62663  | 75497  | 12835  | 4.35  | 99.09 |
| chr9 | 2086602 | 2088507 | 1906   | 0.01 | C_unshiu_00252 | 76721  | 78627  | 1907   | 0.65  | 99.63 |
| chr9 | 2089927 | 2095522 | 5596   | 0.04 | C_unshiu_00252 | 79577  | 85193  | 5617   | 1.9   | 99.27 |
| chr9 | 2097414 | 2101317 | 3904   | 0.03 | C_unshiu_00252 | 87928  | 91839  | 3912   | 1.33  | 99.36 |
| chr9 | 2102622 | 2124144 | 21523  | 0.15 | C_unshiu_00252 | 93776  | 115342 | 21567  | 7.31  | 98.91 |
| chr9 | 2124140 | 2131335 | 7196   | 0.05 | C_unshiu_00252 | 116028 | 123255 | 7228   | 2.45  | 98.99 |
| chr9 | 2132624 | 2144260 | 11637  | 0.08 | C_unshiu_00252 | 125209 | 136866 | 11658  | 3.95  | 99.21 |
| chr9 | 2144864 | 2165370 | 20507  | 0.14 | C_unshiu_00252 | 137552 | 158119 | 20568  | 6.98  | 98.02 |
| chr9 | 2165882 | 2187248 | 21367  | 0.15 | C_unshiu_00260 | 249963 | 228618 | 21346  | 7.44  | 99.89 |
| chr9 | 2187328 | 2196866 | 9539   | 0.07 | C_unshiu_00260 | 228529 | 218994 | 9536   | 3.33  | 99.97 |
| chr9 | 2197808 | 2261362 | 63555  | 0.44 | C_unshiu_00260 | 217597 | 154007 | 63591  | 22.18 | 99.94 |
| chr9 | 2261621 | 2318510 | 56890  | 0.4  | C_unshiu_00260 | 152688 | 95805  | 56884  | 19.84 | 99.95 |
| chr9 | 2318703 | 2336766 | 18064  | 0.13 | C_unshiu_00260 | 95139  | 77077  | 18063  | 6.3   | 99.91 |
| chr9 | 2336766 | 2386679 | 49914  | 0.35 | C_unshiu_00260 | 76984  | 27369  | 49616  | 17.3  | 99.28 |
| chr9 | 2390478 | 2413588 | 23111  | 0.16 | C_unshiu_00260 | 23714  | 602    | 23113  | 8.06  | 99.99 |
| chr9 | 2408753 | 2442540 | 33788  | 0.24 | C_unshiu_00028 | 217037 | 250826 | 33790  | 4.7   | 99.81 |
| chr9 | 2442173 | 2449597 | 7425   | 0.05 | C_unshiu_00028 | 255317 | 262706 | 7390   | 1.03  | 99.14 |
| chr9 | 2444481 | 2495545 | 51065  | 0.36 | C_unshiu_00028 | 270585 | 321648 | 51064  | 7.1   | 99.29 |
| chr9 | 2501724 | 2527375 | 25652  | 0.18 | C_unshiu_00028 | 327613 | 353261 | 25649  | 3.57  | 99.93 |
| chr9 | 2528098 | 2540951 | 12854  | 0.09 | C_unshiu_00028 | 354541 | 367360 | 12820  | 1.78  | 99.21 |
| chr9 | 2582104 | 2594291 | 12188  | 0.09 | C_unshiu_00256 | 78049  | 90219  | 12171  | 4.19  | 99.14 |
| chr9 | 2595061 | 2611178 | 16118  | 0.11 | C_unshiu_00256 | 91355  | 107586 | 16232  | 5.58  | 98.93 |
| chr9 | 2630273 | 2635133 | 4861   | 0.03 | C_unshiu_00141 | 380914 | 385774 | 4861   | 1.21  | 100   |
| chr9 | 2635128 | 2642210 | 7083   | 0.05 | C_unshiu_00902 | 89555  | 96638  | 7084   | 6.08  | 99.08 |
| chr9 | 2646166 | 2651719 | 5554   | 0.04 | C_unshiu_00902 | 104669 | 110232 | 5564   | 4.77  | 99.82 |
| chr9 | 2659704 | 2667104 | 7401   | 0.05 | C_unshiu_02559 | 1910   | 9310   | 7401   | 32.08 | 99.97 |
| chr9 | 2679951 | 2683868 | 3918   | 0.03 | C_unshiu_00499 | 160922 | 164839 | 3918   | 2.04  | 100   |
| chr9 | 2684312 | 2687555 | 3244   | 0.02 | C_unshiu_00499 | 165687 | 168929 | 3243   | 1.69  | 99.97 |
| chr9 | 2691623 | 2710196 | 18574  | 0.13 | C_unshiu_01022 | 84982  | 103545 | 18564  | 17.93 | 99.89 |
| chr9 | 2731674 | 2734847 | 3174   | 0.02 | C_unshiu_01562 | 10990  | 14157  | 3168   | 5.3   | 98.46 |
| chr9 | 2736526 | 2754027 | 17502  | 0.12 | C_unshiu_01562 | 18991  | 36526  | 17536  | 29.34 | 98.38 |
| chr9 | 2754654 | 2764530 | 9877   | 0.07 | C_unshiu_01562 | 38094  | 47971  | 9878   | 16.53 | 98.88 |
| chr9 | 2767886 | 2777857 | 9972   | 0.07 | C_unshiu_01562 | 49809  | 59762  | 9954   | 16.66 | 98.71 |
| chr9 | 2776794 | 2780082 | 3289   | 0.02 | C_unshiu_01304 | 6710   | 9991   | 3282   | 4.25  | 99.15 |
| chr9 | 2791792 | 2812220 | 20429  | 0.14 | C_unshiu_01304 | 26553  | 46840  | 20288  | 26.25 | 99.18 |
| chr9 | 2830259 | 2865979 | 35721  | 0.25 | C_unshiu_01385 | 71332  | 35578  | 35755  | 50.12 | 99.75 |
| chr9 | 2866005 | 2868572 | 2568   | 0.02 | C_unshiu_01385 | 35258  | 32691  | 2568   | 3.6   | 99.88 |
| chr9 | 2869209 | 2875779 | 6571   | 0.05 | C_unshiu_01385 | 31769  | 25193  | 6577   | 9.22  | 99.41 |
| chr9 | 2875959 | 2878373 | 2415   | 0.02 | C_unshiu_01385 | 24841  | 22430  | 2412   | 3.38  | 99.63 |
| chr9 | 2879691 | 2887221 | 7531   | 0.05 | C_unshiu_01385 | 22244  | 14714  | 7531   | 10.56 | 99.95 |
| chr9 | 2889461 | 2890740 | 1280   | 0.01 | C_unshiu_00017 | 455401 | 454136 | 1266   | 0.15  | 98.59 |
| chr9 | 2889887 | 2896339 | 6453   | 0.05 | C_unshiu_00017 | 460926 | 467380 | 6455   | 0.76  | 99.92 |
| chr9 | 2896323 | 2919094 | 22772  | 0.16 | C_unshiu_00017 | 467474 | 490234 | 22761  | 2.67  | 99.95 |
| chr9 | 2899089 | 2954336 | 55248  | 0.39 | C_unshiu_00017 | 470240 | 525476 | 55237  | 6.47  | 99.98 |
| chr9 | 2958155 | 3008245 | 50091  | 0.35 | C_unshiu_00017 | 529379 | 579469 | 50091  | 5.87  | 100   |
| chr9 | 3008227 | 3028262 | 20036  | 0.14 | C_unshiu_00017 | 579505 | 599572 | 20068  | 2.35  | 99.79 |
| chr9 | 3008295 | 3218603 | 210309 | 1.47 | C_unshiu_00017 | 579573 | 789821 | 210249 | 24.64 | 99.89 |
| chr9 | 3218056 | 3222352 | 4297   | 0.03 | C_unshiu_00017 | 794297 | 798586 | 4290   | 0.5   | 99.42 |
| chr9 | 3227722 | 3279725 | 52004  | 0.36 | C_unshiu_00017 | 798270 | 850279 | 52010  | 6.09  | 99.96 |
| chr9 | 3280318 | 3282743 | 2426   | 0.02 | C_unshiu_01896 | 44882  | 42459  | 2424   | 5.4   | 99.63 |
| chr9 | 3283388 | 3291150 | 7763   | 0.05 | C_unshiu_01896 | 41493  | 33749  | 7745   | 17.26 | 98.87 |
| chr9 | 3297892 | 3299996 | 2105   | 0.01 | C_unshiu_02763 | 18850  | 16746  | 2105   | 11.17 | 99.19 |
| chr9 | 3302115 | 3303877 | 1763   | 0.01 | C_unshiu_01896 | 18001  | 16232  | 1770   | 3.94  | 98.25 |
| chr9 | 3306678 | 3312893 | 6216   | 0.04 | C_unshiu_01896 | 16223  | 10056  | 6168   | 13.74 | 98.33 |
| chr9 | 3313167 | 3314486 | 1320   | 0.01 | C_unshiu_00267 | 88069  | 86750  | 1320   | 0.47  | 99.92 |
| chr9 | 3315543 | 3319269 | 3727   | 0.03 | C_unshiu_01896 | 5482   | 1753   | 3730   | 8.31  | 99.84 |
| chr9 | 3319612 | 3320622 | 1011   | 0.01 | C_unshiu_01896 | 1016   | 7      | 1010   | 2.25  | 99.7  |
| chr9 | 3331709 | 3338934 | 7226   | 0.05 | C_unshiu_00267 | 73978  | 66674  | 7305   | 2.58  | 98.03 |
| chr9 | 3338914 | 3345133 | 6220   | 0.04 | C_unshiu_00267 | 66376  | 60159  | 6218   | 2.2   | 99.84 |
| chr9 | 3346282 | 3348032 | 1751   | 0.01 | C_unshiu_00267 | 58293  | 56543  | 1751   | 0.62  | 100   |
| chr9 | 3350263 | 3353509 | 3247   | 0.02 | C_unshiu_00267 | 53749  | 50486  | 3264   | 1.15  | 98.62 |
| chr9 | 3354485 | 3380568 | 26084  | 0.18 | C_unshiu_00267 | 50485  | 24338  | 26148  | 9.25  | 99.55 |
| chr9 | 3381115 | 3404549 | 23435  | 0.16 | C_unshiu_00267 | 23445  | 1      | 23445  | 8.3   | 99.86 |
| chr9 | 3418163 | 3420111 | 1949   | 0.01 | C_unshiu_00390 | 33067  | 31145  | 1923   | 0.85  | 98.15 |
| chr9 | 3421514 | 3427463 | 5950   | 0.04 | C_unshiu_00390 | 29318  | 23358  | 5961   | 2.65  | 98.88 |
| chr9 | 3428194 | 3450223 | 22030  | 0.15 | C_unshiu_02249 | 4585   | 26640  | 22056  | 69.44 | 98.74 |
| chr9 | 3451291 | 3453528 | 2238   | 0.02 | C_unshiu_00390 | 5909   | 3670   | 2240   | 0.99  | 98.88 |
| chr9 | 3453816 | 3456485 | 2670   | 0.02 | C_unshiu_00390 | 3277   | 606    | 2672   | 1.19  | 99.4  |
| chr9 | 3456476 | 3461013 | 4538   | 0.03 | C_unshiu_02259 | 21106  | 16572  | 4535   | 14.51 | 98.59 |
| chr9 | 3480072 | 3483710 | 3639   | 0.03 | C_unshiu_00284 | 67709  | 64078  | 3632   | 1.32  | 98.25 |
| chr9 | 3485005 | 3491983 | 6979   | 0.05 | C_unshiu_00284 | 61575  | 54604  | 6972   | 2.54  | 98.33 |
| chr9 | 3497541 | 3499320 | 1780   | 0.01 | C_unshiu_01595 | 160    | 1939   | 1780   | 3.09  | 100   |
| chr9 | 3499465 | 3502094 | 2630   | 0.02 | C_unshiu_00284 | 49546  | 46918  | 2629   | 0.96  | 99.85 |
| chr9 | 3504854 | 3505858 | 1005   | 0.01 | C_unshiu_00902 | 2159   | 1155   | 1005   | 0.86  | 100   |
| chr9 | 3505863 | 3507886 | 2024   | 0.01 | C_unshiu_00284 | 43385  | 41366  | 2020   | 0.74  | 99.8  |
| chr9 | 3516133 | 3524655 | 8523   | 0.06 | C_unshiu_00796 | 128660 | 120138 | 8523   | 6.62  | 100   |
| chr9 | 3525172 | 3529491 | 4320   | 0.03 | C_unshiu_00796 | 119337 | 115091 | 4247   | 3.3   | 98.13 |
| chr9 | 3537471 | 3551574 | 14104  | 0.1  | C_unshiu_01478 | 1      | 14093  | 14093  | 21.81 | 99.91 |

|      |         |         |       |      |                |        |        |       |       |       |
|------|---------|---------|-------|------|----------------|--------|--------|-------|-------|-------|
| chr9 | 3561539 | 3571179 | 9641  | 0.07 | C_unshiu_01213 | 70977  | 61339  | 9639  | 11.45 | 99.92 |
| chr9 | 3572226 | 3575528 | 3303  | 0.02 | C_unshiu_00721 | 76469  | 79771  | 3303  | 2.34  | 99.97 |
| chr9 | 3575518 | 3592631 | 17114 | 0.12 | C_unshiu_01213 | 57274  | 40163  | 17112 | 20.33 | 99.11 |
| chr9 | 3598179 | 3602767 | 4589  | 0.03 | C_unshiu_01018 | 79207  | 83760  | 4554  | 4.37  | 98.06 |
| chr9 | 3602938 | 3617607 | 14670 | 0.1  | C_unshiu_01018 | 83891  | 98543  | 14653 | 14.07 | 99.51 |
| chr9 | 3614732 | 3617607 | 2876  | 0.02 | C_unshiu_02799 | 17906  | 15017  | 2890  | 16.14 | 99.14 |
| chr9 | 3617723 | 3623748 | 6026  | 0.04 | C_unshiu_02799 | 14882  | 8813   | 6070  | 33.9  | 98.12 |
| chr9 | 3618527 | 3624759 | 6233  | 0.04 | C_unshiu_01722 | 27878  | 21633  | 6246  | 12.06 | 98.4  |
| chr9 | 3624784 | 3626126 | 1343  | 0.01 | C_unshiu_01722 | 21683  | 20341  | 1343  | 2.59  | 100   |
| chr9 | 3626120 | 3627944 | 1825  | 0.01 | C_unshiu_02799 | 8432   | 6610   | 1823  | 10.18 | 99.89 |
| chr9 | 3627952 | 3629214 | 1263  | 0.01 | C_unshiu_02799 | 5151   | 3889   | 1263  | 7.05  | 100   |
| chr9 | 3634488 | 3642547 | 8060  | 0.06 | C_unshiu_01722 | 19563  | 11504  | 8060  | 15.56 | 100   |
| chr9 | 3642885 | 3646215 | 3331  | 0.02 | C_unshiu_00968 | 988    | 4318   | 3331  | 3.04  | 100   |
| chr9 | 3646219 | 3650318 | 4100  | 0.03 | C_unshiu_01722 | 9325   | 5239   | 4087  | 7.89  | 98.32 |
| chr9 | 3652762 | 3656562 | 3801  | 0.03 | C_unshiu_01722 | 3817   | 1      | 3817  | 7.37  | 99.35 |
| chr9 | 3658782 | 3660170 | 1389  | 0.01 | C_unshiu_00968 | 15345  | 16735  | 1391  | 1.27  | 98.27 |
| chr9 | 3667575 | 3680470 | 12896 | 0.09 | C_unshiu_00968 | 21106  | 34046  | 12941 | 11.8  | 98.91 |
| chr9 | 3680471 | 3684503 | 4033  | 0.03 | C_unshiu_00968 | 34144  | 38198  | 4055  | 3.7   | 98.5  |
| chr9 | 3684493 | 3686253 | 1761  | 0.01 | C_unshiu_00040 | 379066 | 377306 | 1761  | 0.27  | 99.94 |
| chr9 | 3697061 | 3698486 | 1426  | 0.01 | C_unshiu_00968 | 65487  | 66912  | 1426  | 1.3   | 99.86 |
| chr9 | 3706779 | 3721366 | 14588 | 0.1  | C_unshiu_00323 | 254218 | 239602 | 14617 | 5.73  | 99.79 |
| chr9 | 3721446 | 3734325 | 12880 | 0.09 | C_unshiu_00323 | 239383 | 226504 | 12880 | 5.05  | 100   |
| chr9 | 3738114 | 3739652 | 1539  | 0.01 | C_unshiu_00323 | 223186 | 221634 | 1553  | 0.61  | 98.07 |
| chr9 | 3742232 | 3748878 | 6647  | 0.05 | C_unshiu_00323 | 220487 | 213839 | 6649  | 2.61  | 99.56 |
| chr9 | 3750306 | 3757114 | 6809  | 0.05 | C_unshiu_01752 | 7172   | 361    | 6812  | 13.52 | 98.4  |
| chr9 | 3790096 | 3794599 | 4504  | 0.03 | C_unshiu_00323 | 181469 | 176970 | 4500  | 1.76  | 99.69 |
| chr9 | 3799081 | 3815596 | 16516 | 0.12 | C_unshiu_00323 | 171892 | 155404 | 16489 | 6.46  | 99.79 |
| chr9 | 3815780 | 3818423 | 2644  | 0.02 | C_unshiu_00323 | 154743 | 152100 | 2644  | 1.04  | 100   |
| chr9 | 3818484 | 3837732 | 19249 | 0.13 | C_unshiu_00323 | 151779 | 132528 | 19252 | 7.55  | 99.75 |
| chr9 | 3842652 | 3854863 | 12212 | 0.09 | C_unshiu_01323 | 63139  | 75350  | 12212 | 16.21 | 100   |
| chr9 | 3872551 | 3874983 | 2433  | 0.02 | C_unshiu_00420 | 101417 | 98985  | 2433  | 1.11  | 100   |
| chr9 | 3895666 | 3900775 | 5110  | 0.04 | C_unshiu_00877 | 105030 | 110129 | 5100  | 4.27  | 98.28 |
| chr9 | 3909511 | 3910781 | 1271  | 0.01 | C_unshiu_01744 | 41660  | 42933  | 1274  | 2.51  | 98.67 |
| chr9 | 3912093 | 3918027 | 5935  | 0.04 | C_unshiu_01744 | 44624  | 50535  | 5912  | 11.64 | 98.87 |
| chr9 | 3924482 | 3926691 | 2210  | 0.02 | C_unshiu_00504 | 168199 | 165990 | 2210  | 1.16  | 99.64 |
| chr9 | 3926282 | 3930426 | 4145  | 0.03 | C_unshiu_00504 | 165975 | 161834 | 4142  | 2.18  | 98.73 |
| chr9 | 3934048 | 3935251 | 1204  | 0.01 | C_unshiu_00504 | 162248 | 161042 | 1207  | 0.63  | 99.34 |
| chr9 | 3935251 | 3962494 | 27244 | 0.19 | C_unshiu_00504 | 160948 | 133632 | 27317 | 14.35 | 98.61 |
| chr9 | 3962500 | 4014365 | 51866 | 0.36 | C_unshiu_00504 | 133518 | 81639  | 51880 | 27.26 | 99.83 |
| chr9 | 4014870 | 4057388 | 42519 | 0.3  | C_unshiu_00504 | 81200  | 38807  | 42394 | 22.27 | 98.62 |
| chr9 | 4056852 | 4090845 | 33994 | 0.24 | C_unshiu_00504 | 38807  | 4820   | 33988 | 17.86 | 99.83 |
| chr9 | 4089579 | 4107502 | 17924 | 0.13 | C_unshiu_01088 | 2161   | 20104  | 17944 | 18.44 | 99.26 |
| chr9 | 4107690 | 4128794 | 21105 | 0.15 | C_unshiu_01088 | 20733  | 41827  | 21095 | 21.68 | 99.5  |
| chr9 | 4128709 | 4137082 | 8374  | 0.06 | C_unshiu_01088 | 41981  | 50373  | 8393  | 8.63  | 99.62 |
| chr9 | 4138156 | 4161288 | 23133 | 0.16 | C_unshiu_01088 | 50364  | 73391  | 23028 | 23.67 | 98.24 |
| chr9 | 4162316 | 4163333 | 1018  | 0.01 | C_unshiu_02503 | 1      | 1019   | 1019  | 4.15  | 99.9  |
| chr9 | 4163339 | 4170317 | 6979  | 0.05 | C_unshiu_02503 | 1465   | 8442   | 6978  | 28.39 | 99.93 |
| chr9 | 4175099 | 4178351 | 3253  | 0.02 | C_unshiu_01088 | 73515  | 76789  | 3275  | 3.37  | 98.47 |
| chr9 | 4182467 | 4183709 | 1243  | 0.01 | C_unshiu_01196 | 69     | 1314   | 1246  | 1.45  | 99.6  |
| chr9 | 4189641 | 4196123 | 6483  | 0.05 | C_unshiu_01196 | 2185   | 8673   | 6489  | 7.53  | 99.42 |
| chr9 | 4208000 | 4244812 | 36813 | 0.26 | C_unshiu_01196 | 19128  | 55957  | 36830 | 42.75 | 99.55 |
| chr9 | 4247211 | 4271156 | 23946 | 0.17 | C_unshiu_01196 | 62129  | 86150  | 24022 | 27.88 | 99.38 |
| chr9 | 4271128 | 4296049 | 24922 | 0.17 | C_unshiu_00115 | 160905 | 185757 | 24853 | 5.75  | 98.64 |
| chr9 | 4296325 | 4313353 | 17029 | 0.12 | C_unshiu_00115 | 186327 | 203353 | 17027 | 3.94  | 98.6  |
| chr9 | 4313361 | 4325726 | 12366 | 0.09 | C_unshiu_00115 | 204070 | 216475 | 12406 | 2.87  | 99.17 |
| chr9 | 4337553 | 4341044 | 3492  | 0.02 | C_unshiu_00115 | 222791 | 226325 | 3535  | 0.82  | 98.47 |
| chr9 | 4341037 | 4344892 | 3856  | 0.03 | C_unshiu_00115 | 227289 | 231147 | 3859  | 0.89  | 99.27 |
| chr9 | 4344882 | 4350978 | 6097  | 0.04 | C_unshiu_00115 | 231282 | 237385 | 6104  | 1.41  | 99.56 |
| chr9 | 4350969 | 4367705 | 16737 | 0.12 | C_unshiu_00115 | 238000 | 254770 | 16771 | 3.88  | 99.15 |
| chr9 | 4373216 | 4391617 | 18402 | 0.13 | C_unshiu_00115 | 259773 | 278133 | 18361 | 4.24  | 98.54 |
| chr9 | 4402929 | 4418475 | 15547 | 0.11 | C_unshiu_00115 | 291633 | 307198 | 15566 | 3.6   | 99.06 |
| chr9 | 4418484 | 4419973 | 1490  | 0.01 | C_unshiu_00115 | 307597 | 309087 | 1491  | 0.34  | 99.4  |
| chr9 | 4420620 | 4463259 | 42640 | 0.3  | C_unshiu_00115 | 309743 | 352425 | 42683 | 9.87  | 99.3  |
| chr9 | 4463275 | 4465587 | 2313  | 0.02 | C_unshiu_00115 | 357889 | 360202 | 2314  | 0.53  | 99.31 |
| chr9 | 4473726 | 4477436 | 3711  | 0.03 | C_unshiu_00564 | 71419  | 67709  | 3711  | 2.12  | 100   |
| chr9 | 4477432 | 4478579 | 1148  | 0.01 | C_unshiu_00115 | 378935 | 380085 | 1151  | 0.27  | 99.13 |
| chr9 | 4479777 | 4483445 | 3669  | 0.03 | C_unshiu_01023 | 78217  | 74549  | 3669  | 3.54  | 99.21 |
| chr9 | 4483882 | 4488026 | 4145  | 0.03 | C_unshiu_01023 | 74549  | 70411  | 4139  | 4     | 98.89 |
| chr9 | 4489200 | 4491029 | 1830  | 0.01 | C_unshiu_01306 | 28248  | 26412  | 1837  | 2.4   | 99.02 |
| chr9 | 4491499 | 4504028 | 12530 | 0.09 | C_unshiu_01023 | 70413  | 57865  | 12549 | 12.12 | 99.72 |
| chr9 | 4506935 | 4519790 | 12856 | 0.09 | C_unshiu_01023 | 55167  | 42291  | 12877 | 12.44 | 98.95 |
| chr9 | 4519773 | 4533523 | 13751 | 0.1  | C_unshiu_01023 | 42102  | 28350  | 13753 | 13.28 | 99.38 |
| chr9 | 4533563 | 4538831 | 5269  | 0.04 | C_unshiu_01023 | 28356  | 23036  | 5321  | 5.14  | 98.52 |
| chr9 | 4565733 | 4590711 | 24979 | 0.17 | C_unshiu_01118 | 13175  | 38106  | 24932 | 26.54 | 98.21 |
| chr9 | 4599444 | 4602167 | 2724  | 0.02 | C_unshiu_01349 | 6136   | 3413   | 2724  | 3.67  | 100   |
| chr9 | 4606603 | 4608816 | 2214  | 0.02 | C_unshiu_01349 | 72887  | 70671  | 2217  | 2.99  | 99.41 |
| chr9 | 4609284 | 4611555 | 2272  | 0.02 | C_unshiu_01349 | 69761  | 67489  | 2273  | 3.07  | 99.52 |
| chr9 | 4616870 | 4618710 | 1841  | 0.01 | C_unshiu_03052 | 3479   | 5322   | 1844  | 16.22 | 99.78 |
| chr9 | 4631005 | 4633187 | 2183  | 0.02 | C_unshiu_00160 | 101103 | 103305 | 2203  | 0.59  | 98.28 |

|      |         |         |        |      |                |        |        |        |       |       |
|------|---------|---------|--------|------|----------------|--------|--------|--------|-------|-------|
| chr9 | 4633183 | 4653318 | 20136  | 0.14 | C_unshiu_00160 | 104892 | 125186 | 20295  | 5.45  | 98.16 |
| chr9 | 4654035 | 4709444 | 55410  | 0.39 | C_unshiu_00160 | 125823 | 181251 | 55429  | 14.9  | 99.38 |
| chr9 | 4711894 | 4804381 | 92488  | 0.65 | C_unshiu_00160 | 183342 | 276015 | 92674  | 24.91 | 99.59 |
| chr9 | 4804435 | 4826381 | 21947  | 0.15 | C_unshiu_00160 | 275973 | 297912 | 21940  | 5.9   | 99.88 |
| chr9 | 4826363 | 4827717 | 1355   | 0.01 | C_unshiu_00160 | 297828 | 299183 | 1356   | 0.36  | 99.93 |
| chr9 | 4827718 | 4829408 | 1691   | 0.01 | C_unshiu_00018 | 65654  | 63964  | 1691   | 0.2   | 100   |
| chr9 | 4829400 | 4862143 | 32744  | 0.23 | C_unshiu_00160 | 301393 | 334100 | 32708  | 8.79  | 99.86 |
| chr9 | 4862143 | 4863256 | 1114   | 0.01 | C_unshiu_00160 | 334551 | 335663 | 1113   | 0.3   | 99.64 |
| chr9 | 4868696 | 4871998 | 3303   | 0.02 | C_unshiu_00160 | 340262 | 343566 | 3305   | 0.89  | 98.91 |
| chr9 | 4872623 | 4893714 | 21092  | 0.15 | C_unshiu_00160 | 344471 | 365554 | 21084  | 5.67  | 99.77 |
| chr9 | 4942384 | 4945391 | 3008   | 0.02 | C_unshiu_02366 | 2722   | 5729   | 3008   | 10.76 | 99.73 |
| chr9 | 4947227 | 4949620 | 2394   | 0.02 | C_unshiu_01935 | 39790  | 42194  | 2405   | 5.55  | 98.96 |
| chr9 | 4949643 | 4961204 | 11562  | 0.08 | C_unshiu_00241 | 204421 | 192859 | 11563  | 3.85  | 99.96 |
| chr9 | 4961204 | 5037935 | 76732  | 0.54 | C_unshiu_00241 | 192733 | 115988 | 76746  | 25.52 | 99.93 |
| chr9 | 5042101 | 5083718 | 41618  | 0.29 | C_unshiu_00391 | 16985  | 58607  | 41623  | 18.5  | 99.99 |
| chr9 | 5087454 | 5088635 | 1182   | 0.01 | C_unshiu_01161 | 21281  | 22462  | 1182   | 1.32  | 100   |
| chr9 | 5088631 | 5148326 | 59696  | 0.42 | C_unshiu_00391 | 63030  | 122726 | 59697  | 26.53 | 99.95 |
| chr9 | 5151271 | 5188326 | 37056  | 0.26 | C_unshiu_00391 | 122377 | 159416 | 37040  | 16.46 | 99.8  |
| chr9 | 5188333 | 5204151 | 15819  | 0.11 | C_unshiu_00391 | 159793 | 175580 | 15788  | 7.02  | 99.8  |
| chr9 | 5204281 | 5206765 | 2485   | 0.02 | C_unshiu_00391 | 175668 | 178128 | 2461   | 1.09  | 98.27 |
| chr9 | 5207130 | 5208219 | 1090   | 0.01 | C_unshiu_00389 | 53539  | 54630  | 1092   | 0.48  | 98.35 |
| chr9 | 5209062 | 5233613 | 24552  | 0.17 | C_unshiu_00331 | 215007 | 190434 | 24574  | 9.75  | 98.91 |
| chr9 | 5233532 | 5237891 | 4360   | 0.03 | C_unshiu_00324 | 87749  | 83410  | 4340   | 1.7   | 99.22 |
| chr9 | 5236618 | 5237998 | 1381   | 0.01 | C_unshiu_00324 | 71825  | 70445  | 1381   | 0.54  | 98.19 |
| chr9 | 5238191 | 5239656 | 1466   | 0.01 | C_unshiu_00324 | 83217  | 81753  | 1465   | 0.57  | 99.93 |
| chr9 | 5248197 | 5251044 | 2848   | 0.02 | C_unshiu_00295 | 1      | 2849   | 2849   | 1.06  | 99.89 |
| chr9 | 5252129 | 5290437 | 38309  | 0.27 | C_unshiu_00295 | 4529   | 42838  | 38310  | 14.25 | 99.99 |
| chr9 | 5291050 | 5418222 | 127173 | 0.89 | C_unshiu_00295 | 43914  | 171085 | 127172 | 47.3  | 99.97 |
| chr9 | 5418223 | 5424713 | 6491   | 0.05 | C_unshiu_00410 | 19253  | 25743  | 6491   | 2.94  | 100   |
| chr9 | 5424710 | 5481818 | 57109  | 0.4  | C_unshiu_00295 | 178004 | 235084 | 57081  | 21.23 | 99.87 |
| chr9 | 5481943 | 5490661 | 8719   | 0.06 | C_unshiu_00295 | 235166 | 243841 | 8676   | 3.23  | 99.06 |
| chr9 | 5491946 | 5494719 | 2774   | 0.02 | C_unshiu_00295 | 245677 | 248450 | 2774   | 1.03  | 100   |
| chr9 | 5496418 | 5514561 | 18144  | 0.13 | C_unshiu_00295 | 250727 | 268874 | 18148  | 6.75  | 99.94 |
| chr9 | 5522723 | 5527092 | 4370   | 0.03 | C_unshiu_01187 | 28575  | 24206  | 4370   | 5.04  | 99.89 |
| chr9 | 5535295 | 5537761 | 2467   | 0.02 | C_unshiu_01126 | 4418   | 6859   | 2442   | 2.62  | 98.34 |
| chr9 | 5538474 | 5543309 | 4836   | 0.03 | C_unshiu_01187 | 83888  | 79061  | 4828   | 5.57  | 98.35 |
| chr9 | 5543331 | 5546989 | 3659   | 0.03 | C_unshiu_01187 | 79178  | 75524  | 3655   | 4.21  | 98.96 |
| chr9 | 5550513 | 5556362 | 5850   | 0.04 | C_unshiu_01867 | 45848  | 40010  | 5839   | 12.74 | 98.94 |
| chr9 | 5556387 | 5566205 | 9819   | 0.07 | C_unshiu_01187 | 74624  | 64821  | 9804   | 11.3  | 98.71 |
| chr9 | 5569423 | 5571403 | 1981   | 0.01 | C_unshiu_01187 | 61290  | 59309  | 1982   | 2.28  | 99.85 |
| chr9 | 5572046 | 5581432 | 9387   | 0.07 | C_unshiu_01187 | 58789  | 49391  | 9399   | 10.83 | 99.47 |
| chr9 | 5590512 | 5611343 | 20832  | 0.15 | C_unshiu_01187 | 49397  | 28540  | 20858  | 24.04 | 99.69 |
| chr9 | 5624288 | 5653422 | 29135  | 0.2  | C_unshiu_01867 | 29136  | 1      | 29136  | 63.55 | 99.12 |
| chr9 | 5669435 | 5682360 | 12926  | 0.09 | C_unshiu_00465 | 73827  | 86754  | 12928  | 6.36  | 99.98 |
| chr9 | 5687210 | 5689881 | 2672   | 0.02 | C_unshiu_00465 | 91725  | 94397  | 2673   | 1.32  | 99.93 |
| chr9 | 5690222 | 5691928 | 1707   | 0.01 | C_unshiu_00465 | 95221  | 96928  | 1708   | 0.84  | 99.94 |
| chr9 | 5693694 | 5710128 | 16435  | 0.11 | C_unshiu_00465 | 97832  | 114284 | 16453  | 8.1   | 99.84 |
| chr9 | 5712380 | 5713444 | 1065   | 0.01 | C_unshiu_00465 | 96249  | 97314  | 1066   | 0.52  | 98.87 |
| chr9 | 5717678 | 5720560 | 2883   | 0.02 | C_unshiu_00104 | 169453 | 166571 | 2883   | 0.64  | 100   |
| chr9 | 5717688 | 5816262 | 98575  | 0.69 | C_unshiu_00104 | 169453 | 267932 | 98480  | 21.83 | 99.84 |
| chr9 | 5853392 | 5867240 | 13849  | 0.1  | C_unshiu_00074 | 416304 | 430150 | 13847  | 2.7   | 99.96 |
| chr9 | 5867866 | 5895379 | 27514  | 0.19 | C_unshiu_00074 | 435047 | 462561 | 27515  | 5.37  | 99.97 |
| chr9 | 5895405 | 5923392 | 27988  | 0.2  | C_unshiu_00074 | 464726 | 492720 | 27995  | 5.46  | 99.97 |
| chr9 | 5926760 | 5943670 | 16911  | 0.12 | C_unshiu_01641 | 4398   | 21285  | 16888  | 30.45 | 98.96 |
| chr9 | 5949153 | 5950964 | 1812   | 0.01 | C_unshiu_01641 | 25816  | 27628  | 1813   | 3.27  | 99.61 |
| chr9 | 5950965 | 5978905 | 27941  | 0.19 | C_unshiu_01641 | 27564  | 55447  | 27884  | 50.28 | 99.46 |
| chr9 | 5979594 | 5981477 | 1884   | 0.01 | C_unshiu_01321 | 19551  | 17668  | 1884   | 2.5   | 100   |
| chr9 | 5985109 | 5994022 | 8914   | 0.06 | C_unshiu_01321 | 16716  | 7803   | 8914   | 11.82 | 100   |
| chr9 | 5995504 | 5996865 | 1362   | 0.01 | C_unshiu_01321 | 4421   | 3061   | 1361   | 1.81  | 99.93 |
| chr9 | 5996866 | 5998850 | 1985   | 0.01 | C_unshiu_00399 | 25781  | 23797  | 1985   | 0.89  | 100   |
| chr9 | 6012853 | 6014127 | 1275   | 0.01 | C_unshiu_00240 | 1495   | 2769   | 1275   | 0.42  | 100   |
| chr9 | 6029443 | 6030812 | 1370   | 0.01 | C_unshiu_00240 | 18902  | 20271  | 1370   | 0.45  | 99.78 |
| chr9 | 6036643 | 6051436 | 14794  | 0.1  | C_unshiu_00240 | 24966  | 39696  | 14731  | 4.88  | 99.12 |
| chr9 | 6052336 | 6055497 | 3162   | 0.02 | C_unshiu_00240 | 39904  | 43052  | 3149   | 1.04  | 98.9  |
| chr9 | 6055479 | 6138890 | 83412  | 0.58 | C_unshiu_00240 | 43159  | 126553 | 83395  | 27.65 | 99.96 |
| chr9 | 6138872 | 6148181 | 9310   | 0.06 | C_unshiu_00240 | 126635 | 135946 | 9312   | 3.09  | 99.87 |
| chr9 | 6147903 | 6235433 | 87531  | 0.61 | C_unshiu_00240 | 136001 | 223515 | 87515  | 29.02 | 99.96 |
| chr9 | 6242664 | 6244014 | 1351   | 0.01 | C_unshiu_00185 | 1945   | 3294   | 1350   | 0.39  | 99.93 |
| chr9 | 6244023 | 6262736 | 18714  | 0.13 | C_unshiu_00093 | 70029  | 88742  | 18714  | 4.01  | 100   |
| chr9 | 6262792 | 6282236 | 19445  | 0.14 | C_unshiu_00093 | 89448  | 108899 | 19452  | 4.17  | 99.75 |
| chr9 | 6280712 | 6304750 | 24039  | 0.17 | C_unshiu_00093 | 106604 | 130635 | 24032  | 5.15  | 99.73 |
| chr9 | 6284761 | 6485088 | 200328 | 1.4  | C_unshiu_00093 | 110660 | 310946 | 200287 | 42.94 | 99.96 |
| chr9 | 6485618 | 6562156 | 76539  | 0.53 | C_unshiu_00093 | 312225 | 388716 | 76492  | 16.4  | 99.94 |
| chr9 | 6542168 | 6636891 | 94724  | 0.66 | C_unshiu_00093 | 368752 | 463461 | 94710  | 20.3  | 99.96 |
| chr9 | 6637996 | 6681934 | 43939  | 0.31 | C_unshiu_01282 | 32073  | 75990  | 43918  | 55.88 | 99.92 |
| chr9 | 6681926 | 6684492 | 2567   | 0.02 | C_unshiu_01211 | 14764  | 17330  | 2567   | 3.05  | 100   |
| chr9 | 6684493 | 6687831 | 3339   | 0.02 | C_unshiu_00241 | 116236 | 112892 | 3345   | 1.11  | 99.76 |
| chr9 | 6687941 | 6717614 | 29674  | 0.21 | C_unshiu_00241 | 112348 | 82706  | 29643  | 9.86  | 99.86 |
| chr9 | 6720171 | 6745062 | 24892  | 0.17 | C_unshiu_01204 | 60553  | 85310  | 24758  | 29.02 | 98.61 |

|      |         |         |        |      |                |        |        |        |       |       |
|------|---------|---------|--------|------|----------------|--------|--------|--------|-------|-------|
| chr9 | 6750457 | 6794224 | 43768  | 0.31 | C_unshiu_00921 | 47697  | 91448  | 43752  | 38.17 | 99.84 |
| chr9 | 6794424 | 6805893 | 11470  | 0.08 | C_unshiu_00921 | 91704  | 103153 | 11450  | 9.99  | 99.78 |
| chr9 | 6811161 | 6836631 | 25471  | 0.18 | C_unshiu_00098 | 25349  | 3      | 25347  | 5.53  | 99.24 |
| chr9 | 6840252 | 6867477 | 27226  | 0.19 | C_unshiu_02322 | 27226  | 1      | 27226  | 93.17 | 99.97 |
| chr9 | 6872262 | 6875824 | 3563   | 0.02 | C_unshiu_00015 | 24125  | 20584  | 3542   | 0.4   | 98.26 |
| chr9 | 6880802 | 6941477 | 60676  | 0.42 | C_unshiu_00567 | 18142  | 78932  | 60791  | 34.79 | 99.13 |
| chr9 | 6943193 | 7012093 | 68901  | 0.48 | C_unshiu_00567 | 81212  | 150093 | 68882  | 39.42 | 99.96 |
| chr9 | 7012012 | 7031300 | 19289  | 0.13 | C_unshiu_00567 | 150072 | 169375 | 19304  | 11.05 | 99.79 |
| chr9 | 7040253 | 7192288 | 152036 | 1.06 | C_unshiu_00380 | 229957 | 77951  | 152007 | 66.1  | 99.95 |
| chr9 | 7197774 | 7214481 | 16708  | 0.12 | C_unshiu_00138 | 277804 | 261097 | 16708  | 4.14  | 99.98 |
| chr9 | 7216898 | 7239207 | 22310  | 0.16 | C_unshiu_00138 | 255568 | 233267 | 22302  | 5.52  | 99.88 |
| chr9 | 7239050 | 7309307 | 70258  | 0.49 | C_unshiu_00138 | 230065 | 159931 | 70135  | 17.36 | 99.75 |
| chr9 | 7310397 | 7345714 | 35318  | 0.25 | C_unshiu_00138 | 159390 | 124072 | 35319  | 8.74  | 99.99 |
| chr9 | 7345715 | 7352980 | 7266   | 0.05 | C_unshiu_00898 | 53661  | 46396  | 7266   | 6.2   | 100   |
| chr9 | 7352977 | 7362202 | 9226   | 0.06 | C_unshiu_00118 | 172811 | 163586 | 9226   | 2.16  | 100   |
| chr9 | 7362222 | 7365768 | 3547   | 0.02 | C_unshiu_01372 | 33196  | 36742  | 3547   | 4.87  | 100   |
| chr9 | 7366192 | 7419797 | 53606  | 0.37 | C_unshiu_00118 | 159054 | 105456 | 53599  | 12.56 | 99.89 |
| chr9 | 7421140 | 7425199 | 4060   | 0.03 | C_unshiu_00118 | 103706 | 99647  | 4060   | 0.95  | 100   |
| chr9 | 7430780 | 7479450 | 48671  | 0.34 | C_unshiu_00118 | 94937  | 46267  | 48671  | 11.4  | 99.97 |
| chr9 | 7482094 | 7494089 | 11996  | 0.08 | C_unshiu_01933 | 15193  | 3201   | 11993  | 27.62 | 99.91 |
| chr9 | 7490564 | 7521533 | 30970  | 0.22 | C_unshiu_00118 | 415415 | 384446 | 30970  | 7.25  | 100   |
| chr9 | 7522864 | 7545086 | 22223  | 0.16 | C_unshiu_00118 | 382713 | 360496 | 22218  | 5.2   | 99.88 |
| chr9 | 7551093 | 7580162 | 29070  | 0.2  | C_unshiu_00118 | 354753 | 325684 | 29070  | 6.81  | 100   |
| chr9 | 7580184 | 7610159 | 29976  | 0.21 | C_unshiu_00118 | 325167 | 295191 | 29977  | 7.02  | 99.95 |
| chr9 | 7610903 | 7617677 | 6775   | 0.05 | C_unshiu_00118 | 294104 | 287330 | 6775   | 1.59  | 99.99 |
| chr9 | 7617672 | 7653149 | 35478  | 0.25 | C_unshiu_00118 | 287400 | 251923 | 35478  | 8.31  | 99.99 |
| chr9 | 7653982 | 7671381 | 17400  | 0.12 | C_unshiu_00118 | 250759 | 233360 | 17400  | 4.08  | 99.98 |
| chr9 | 7673190 | 7728546 | 55357  | 0.39 | C_unshiu_00118 | 230968 | 175623 | 55346  | 12.96 | 99.96 |
| chr9 | 7728910 | 7731020 | 2111   | 0.01 | C_unshiu_00118 | 174875 | 172766 | 2110   | 0.49  | 99.48 |
| chr9 | 7731974 | 7747393 | 15420  | 0.11 | C_unshiu_00138 | 123868 | 108449 | 15420  | 3.82  | 100   |
| chr9 | 7747402 | 7748639 | 1238   | 0.01 | C_unshiu_00118 | 163733 | 162490 | 1244   | 0.29  | 98.71 |
| chr9 | 7750828 | 7752187 | 1360   | 0.01 | C_unshiu_00138 | 103655 | 102296 | 1360   | 0.34  | 100   |
| chr9 | 7752671 | 7795643 | 42973  | 0.3  | C_unshiu_00138 | 101701 | 58718  | 42984  | 10.64 | 99.79 |
| chr9 | 7795759 | 7798551 | 2793   | 0.02 | C_unshiu_00138 | 58126  | 55334  | 2793   | 0.69  | 99.18 |
| chr9 | 7801881 | 7820000 | 18120  | 0.13 | C_unshiu_00138 | 51344  | 33225  | 18120  | 4.49  | 99.97 |
| chr9 | 7853828 | 7873879 | 20052  | 0.14 | C_unshiu_01462 | 24879  | 4931   | 19949  | 30.32 | 99.03 |
| chr9 | 7864559 | 7900554 | 35996  | 0.25 | C_unshiu_00118 | 1      | 36007  | 36007  | 8.43  | 99.97 |
| chr9 | 7902482 | 7905297 | 2816   | 0.02 | C_unshiu_00672 | 81161  | 78370  | 2792   | 1.85  | 98.58 |
| chr9 | 7918868 | 7955329 | 36462  | 0.25 | C_unshiu_00259 | 135620 | 172083 | 36464  | 12.7  | 99.94 |
| chr9 | 7956381 | 7998114 | 41734  | 0.29 | C_unshiu_00259 | 173604 | 215312 | 41709  | 14.53 | 99.9  |
| chr9 | 7997510 | 8026832 | 29323  | 0.2  | C_unshiu_00259 | 214823 | 244144 | 29322  | 10.21 | 99.76 |
| chr9 | 8027643 | 8036828 | 9186   | 0.06 | C_unshiu_00259 | 247632 | 256817 | 9186   | 3.2   | 100   |
| chr9 | 8039078 | 8040533 | 1456   | 0.01 | C_unshiu_00401 | 215833 | 214390 | 1444   | 0.65  | 98.76 |
| chr9 | 8040866 | 8043391 | 2526   | 0.02 | C_unshiu_00401 | 214395 | 211871 | 2525   | 1.13  | 99.88 |
| chr9 | 8045382 | 8065158 | 19777  | 0.14 | C_unshiu_00259 | 263934 | 283597 | 19664  | 6.85  | 98.84 |
| chr9 | 8065189 | 8067231 | 2043   | 0.01 | C_unshiu_00259 | 283486 | 285532 | 2047   | 0.71  | 99.8  |
| chr9 | 8065298 | 8067231 | 1934   | 0.01 | C_unshiu_00401 | 220287 | 218350 | 1938   | 0.87  | 99.79 |
| chr9 | 8067283 | 8069361 | 2079   | 0.01 | C_unshiu_00846 | 41227  | 39149  | 2079   | 1.69  | 100   |
| chr9 | 8070906 | 8072488 | 1583   | 0.01 | C_unshiu_00224 | 301210 | 302796 | 1587   | 0.51  | 98.24 |
| chr9 | 8076618 | 8077672 | 1055   | 0.01 | C_unshiu_01062 | 91097  | 92151  | 1055   | 1.07  | 99.53 |
| chr9 | 8079161 | 8082950 | 3790   | 0.03 | C_unshiu_02043 | 12438  | 16225  | 3788   | 9.71  | 98.26 |
| chr9 | 8084108 | 8104993 | 20886  | 0.15 | C_unshiu_00401 | 203097 | 182212 | 20886  | 9.37  | 99.98 |
| chr9 | 8105373 | 8106431 | 1059   | 0.01 | C_unshiu_00283 | 274491 | 273434 | 1058   | 0.38  | 98.87 |
| chr9 | 8119712 | 8215823 | 96112  | 0.67 | C_unshiu_00401 | 174998 | 78882  | 96117  | 43.12 | 99.85 |
| chr9 | 8217235 | 8252280 | 35046  | 0.24 | C_unshiu_00401 | 77011  | 41972  | 35040  | 15.72 | 99.93 |
| chr9 | 8287828 | 8291526 | 3699   | 0.03 | C_unshiu_01085 | 16632  | 12934  | 3699   | 3.79  | 100   |
| chr9 | 8291525 | 8303741 | 12217  | 0.09 | C_unshiu_00197 | 196890 | 209079 | 12190  | 3.61  | 98.83 |
| chr9 | 8308398 | 8363954 | 55557  | 0.39 | C_unshiu_00197 | 213777 | 269356 | 55580  | 16.46 | 99.64 |
| chr9 | 8363954 | 8372386 | 8433   | 0.06 | C_unshiu_00197 | 269290 | 277724 | 8435   | 2.5   | 99.96 |
| chr9 | 8372625 | 8376386 | 3762   | 0.03 | C_unshiu_00197 | 278210 | 281972 | 3763   | 1.11  | 99.97 |
| chr9 | 8391053 | 8523588 | 132536 | 0.92 | C_unshiu_00262 | 1      | 132440 | 132440 | 46.44 | 99.72 |
| chr9 | 8524655 | 8542457 | 17803  | 0.12 | C_unshiu_00262 | 134105 | 151945 | 17841  | 6.26  | 99.78 |
| chr9 | 8542448 | 8582416 | 39969  | 0.28 | C_unshiu_00262 | 151990 | 191955 | 39966  | 14.01 | 99.97 |
| chr9 | 8582308 | 8654082 | 71775  | 0.5  | C_unshiu_00262 | 191956 | 263725 | 71770  | 25.16 | 99.97 |
| chr9 | 8655857 | 8667703 | 11847  | 0.08 | C_unshiu_00262 | 263593 | 275442 | 11850  | 4.15  | 99.87 |
| chr9 | 8668212 | 8670419 | 2208   | 0.02 | C_unshiu_00305 | 149186 | 151393 | 2208   | 0.84  | 100   |
| chr9 | 8671761 | 8674951 | 3191   | 0.02 | C_unshiu_00193 | 25809  | 28999  | 3191   | 0.93  | 99.94 |
| chr9 | 8677862 | 8679878 | 2017   | 0.01 | C_unshiu_00193 | 30589  | 32605  | 2017   | 0.59  | 99.5  |
| chr9 | 8681725 | 8685301 | 3577   | 0.02 | C_unshiu_00193 | 33435  | 37000  | 3566   | 1.04  | 99.44 |
| chr9 | 8687630 | 8697414 | 9785   | 0.07 | C_unshiu_00193 | 40232  | 50016  | 9785   | 2.86  | 100   |
| chr9 | 8697639 | 8701087 | 3449   | 0.02 | C_unshiu_02381 | 1      | 3487   | 3487   | 12.6  | 98.11 |
| chr9 | 8701700 | 8704024 | 2325   | 0.02 | C_unshiu_02381 | 2374   | 4698   | 2325   | 8.4   | 99.53 |
| chr9 | 8704025 | 8705523 | 1499   | 0.01 | C_unshiu_00193 | 12588  | 14084  | 1497   | 0.44  | 99.53 |
| chr9 | 8704025 | 8705523 | 1499   | 0.01 | C_unshiu_02381 | 9956   | 11452  | 1497   | 5.41  | 99.47 |
| chr9 | 8710297 | 8719541 | 9245   | 0.06 | C_unshiu_02381 | 11443  | 20692  | 9250   | 33.43 | 99.81 |
| chr9 | 8717428 | 8811851 | 94424  | 0.66 | C_unshiu_00193 | 60245  | 154666 | 94422  | 27.63 | 99.68 |
| chr9 | 8811849 | 8835734 | 23886  | 0.17 | C_unshiu_00193 | 155964 | 179848 | 23885  | 6.99  | 99.98 |
| chr9 | 8836255 | 8896212 | 59958  | 0.42 | C_unshiu_00193 | 180477 | 240439 | 59963  | 17.54 | 99.97 |
| chr9 | 8897874 | 8916885 | 19012  | 0.13 | C_unshiu_00193 | 246272 | 265283 | 19012  | 5.56  | 99.94 |

|      |          |          |        |      |                |        |        |        |       |       |
|------|----------|----------|--------|------|----------------|--------|--------|--------|-------|-------|
| chr9 | 8922840  | 8934319  | 11480  | 0.08 | C_unshiu_00193 | 269030 | 280527 | 11498  | 3.36  | 99.84 |
| chr9 | 8937083  | 8994802  | 57720  | 0.4  | C_unshiu_00193 | 282977 | 340740 | 57764  | 16.9  | 99.73 |
| chr9 | 8994800  | 8995822  | 1023   | 0.01 | C_unshiu_00193 | 341777 | 340756 | 1022   | 0.3   | 99.8  |
| chr9 | 9012666  | 9027786  | 15121  | 0.11 | C_unshiu_00830 | 61296  | 76362  | 15067  | 12.07 | 98.78 |
| chr9 | 9032528  | 9034593  | 2066   | 0.01 | C_unshiu_00830 | 81971  | 84035  | 2065   | 1.65  | 99.85 |
| chr9 | 9036099  | 9039719  | 3621   | 0.03 | C_unshiu_00830 | 87126  | 90746  | 3621   | 2.9   | 99.86 |
| chr9 | 9049651  | 9055684  | 6034   | 0.04 | C_unshiu_01442 | 46811  | 52843  | 6033   | 8.97  | 99.83 |
| chr9 | 9055684  | 9087906  | 32223  | 0.22 | C_unshiu_01442 | 33273  | 1041   | 32233  | 47.91 | 99.87 |
| chr9 | 9100291  | 9102373  | 2083   | 0.01 | C_unshiu_00741 | 76717  | 78810  | 2094   | 1.52  | 98.62 |
| chr9 | 9104164  | 9126706  | 22543  | 0.16 | C_unshiu_00830 | 94236  | 116768 | 22533  | 18.05 | 99.54 |
| chr9 | 9127056  | 9133791  | 6736   | 0.05 | C_unshiu_00830 | 117522 | 124224 | 6703   | 5.37  | 98.37 |
| chr9 | 9134721  | 9177112  | 42392  | 0.3  | C_unshiu_00050 | 229957 | 187512 | 42446  | 7.05  | 99.71 |
| chr9 | 9177104  | 9233728  | 56625  | 0.4  | C_unshiu_00050 | 186825 | 130231 | 56595  | 9.4   | 99.54 |
| chr9 | 9234336  | 9246520  | 12185  | 0.09 | C_unshiu_00050 | 129576 | 117386 | 12191  | 2.02  | 98.56 |
| chr9 | 9249576  | 9250643  | 1068   | 0.01 | C_unshiu_01426 | 63776  | 64843  | 1068   | 1.56  | 99.25 |
| chr9 | 9256671  | 9279634  | 22964  | 0.16 | C_unshiu_02523 | 23021  | 29     | 22993  | 95.87 | 99.68 |
| chr9 | 9284065  | 9302359  | 18295  | 0.13 | C_unshiu_01119 | 72057  | 53762  | 18296  | 19.48 | 99.53 |
| chr9 | 9304006  | 9309163  | 5158   | 0.04 | C_unshiu_01119 | 51537  | 46375  | 5163   | 5.5   | 99.86 |
| chr9 | 9309852  | 9316991  | 7140   | 0.05 | C_unshiu_01119 | 46535  | 39383  | 7153   | 7.61  | 99.4  |
| chr9 | 9321613  | 9323817  | 2205   | 0.02 | C_unshiu_00625 | 159972 | 157779 | 2194   | 1.36  | 98.78 |
| chr9 | 9324449  | 9352862  | 28414  | 0.2  | C_unshiu_00625 | 156996 | 128776 | 28221  | 17.43 | 98.25 |
| chr9 | 9353406  | 9367987  | 14582  | 0.1  | C_unshiu_01524 | 2281   | 16852  | 14572  | 23.53 | 99.57 |
| chr9 | 9369601  | 9378375  | 8775   | 0.06 | C_unshiu_00966 | 53530  | 62299  | 8770   | 7.96  | 98.55 |
| chr9 | 9378396  | 9380790  | 2395   | 0.02 | C_unshiu_00966 | 64788  | 67178  | 2391   | 2.17  | 99.12 |
| chr9 | 9390787  | 9401014  | 10228  | 0.07 | C_unshiu_00079 | 5074   | 15330  | 10257  | 2.07  | 98.45 |
| chr9 | 9413368  | 9440328  | 26961  | 0.19 | C_unshiu_00592 | 37227  | 64270  | 27044  | 16    | 99.07 |
| chr9 | 9464036  | 9471675  | 7640   | 0.05 | C_unshiu_00592 | 73263  | 80918  | 7656   | 4.53  | 99.43 |
| chr9 | 9497049  | 9501536  | 4488   | 0.03 | C_unshiu_00592 | 92737  | 97223  | 4487   | 2.65  | 99.06 |
| chr9 | 9501544  | 9505051  | 3508   | 0.02 | C_unshiu_01665 | 3511   | 1      | 3511   | 6.45  | 99.69 |
| chr9 | 9546787  | 9548472  | 1686   | 0.01 | C_unshiu_00020 | 635293 | 636978 | 1686   | 0.21  | 100   |
| chr9 | 9566591  | 9573443  | 6853   | 0.05 | C_unshiu_00912 | 77208  | 70432  | 6777   | 5.85  | 98.61 |
| chr9 | 9573962  | 9579875  | 5914   | 0.04 | C_unshiu_00063 | 471892 | 465979 | 5914   | 1.06  | 100   |
| chr9 | 9586670  | 9712960  | 126291 | 0.88 | C_unshiu_00063 | 460981 | 334701 | 126281 | 22.54 | 99.96 |
| chr9 | 9725634  | 9735001  | 9368   | 0.07 | C_unshiu_00063 | 317988 | 308621 | 9368   | 1.67  | 100   |
| chr9 | 9737734  | 9738850  | 1117   | 0.01 | C_unshiu_00063 | 305573 | 304458 | 1116   | 0.2   | 99.55 |
| chr9 | 9740107  | 9792932  | 52826  | 0.37 | C_unshiu_00063 | 302770 | 250009 | 52762  | 9.42  | 99.4  |
| chr9 | 9793025  | 9799718  | 6694   | 0.05 | C_unshiu_00063 | 246490 | 239794 | 6697   | 1.2   | 98.49 |
| chr9 | 9800563  | 9809498  | 8936   | 0.06 | C_unshiu_00063 | 240919 | 232043 | 8877   | 1.58  | 98.83 |
| chr9 | 9807894  | 9825130  | 17237  | 0.12 | C_unshiu_00063 | 232037 | 214791 | 17247  | 3.08  | 98.76 |
| chr9 | 9831061  | 9832527  | 1467   | 0.01 | C_unshiu_00063 | 208495 | 207037 | 1459   | 0.26  | 98.7  |
| chr9 | 9834330  | 9836406  | 2077   | 0.01 | C_unshiu_00063 | 204681 | 202610 | 2072   | 0.37  | 99.23 |
| chr9 | 9840242  | 9862246  | 22005  | 0.15 | C_unshiu_00063 | 199504 | 177470 | 22035  | 3.93  | 99.15 |
| chr9 | 9863777  | 9870960  | 7184   | 0.05 | C_unshiu_00063 | 177244 | 170059 | 7186   | 1.28  | 99.62 |
| chr9 | 9871185  | 9876233  | 5049   | 0.04 | C_unshiu_00063 | 169891 | 164840 | 5052   | 0.9   | 99.86 |
| chr9 | 9877530  | 9883185  | 5656   | 0.04 | C_unshiu_00063 | 164482 | 158882 | 5601   | 1     | 98.22 |
| chr9 | 9883211  | 9893192  | 9982   | 0.07 | C_unshiu_00063 | 158787 | 148868 | 9920   | 1.77  | 98.46 |
| chr9 | 9897760  | 9899460  | 1701   | 0.01 | C_unshiu_00063 | 145371 | 143667 | 1705   | 0.3   | 99.53 |
| chr9 | 9899661  | 9914722  | 15062  | 0.11 | C_unshiu_00063 | 143174 | 128105 | 15070  | 2.69  | 99.59 |
| chr9 | 9914785  | 9921524  | 6740   | 0.05 | C_unshiu_00063 | 127812 | 121065 | 6748   | 1.2   | 99.32 |
| chr9 | 9922383  | 9938643  | 16261  | 0.11 | C_unshiu_00161 | 1454   | 17727  | 16274  | 4.37  | 99.52 |
| chr9 | 9939499  | 9978458  | 38960  | 0.27 | C_unshiu_00161 | 19073  | 58084  | 39012  | 10.49 | 99.52 |
| chr9 | 9987645  | 9999134  | 11490  | 0.08 | C_unshiu_00161 | 70394  | 81843  | 11450  | 3.08  | 98.07 |
| chr9 | 10006636 | 10021186 | 14551  | 0.1  | C_unshiu_02138 | 6654   | 21219  | 14566  | 41.19 | 98.3  |
| chr9 | 10021199 | 10029098 | 7900   | 0.06 | C_unshiu_02138 | 21665  | 29529  | 7865   | 22.24 | 98.48 |
| chr9 | 10031131 | 10032354 | 1224   | 0.01 | C_unshiu_02015 | 34374  | 33151  | 1224   | 3.05  | 100   |
| chr9 | 10034156 | 10038460 | 4305   | 0.03 | C_unshiu_02015 | 30613  | 26313  | 4301   | 10.72 | 99.61 |
| chr9 | 10041580 | 10045031 | 3452   | 0.02 | C_unshiu_01864 | 20734  | 24185  | 3452   | 7.51  | 100   |
| chr9 | 10045026 | 10058825 | 13800  | 0.1  | C_unshiu_02015 | 20081  | 6142   | 13940  | 34.74 | 98.86 |
| chr9 | 10058849 | 10068290 | 9442   | 0.07 | C_unshiu_00161 | 124356 | 133802 | 9447   | 2.54  | 99.55 |
| chr9 | 10068288 | 10069764 | 1477   | 0.01 | C_unshiu_00161 | 134505 | 135984 | 1480   | 0.4   | 99.32 |
| chr9 | 10076576 | 10079672 | 3097   | 0.02 | C_unshiu_00161 | 138131 | 141225 | 3095   | 0.83  | 99.55 |
| chr9 | 10079768 | 10082733 | 2966   | 0.02 | C_unshiu_00161 | 141577 | 144544 | 2968   | 0.8   | 99.8  |
| chr9 | 10082752 | 10105395 | 22644  | 0.16 | C_unshiu_00161 | 144993 | 167657 | 22665  | 6.09  | 99.23 |
| chr9 | 10110096 | 10143619 | 33524  | 0.23 | C_unshiu_00161 | 170936 | 204509 | 33574  | 9.03  | 99.57 |
| chr9 | 10143759 | 10153582 | 9824   | 0.07 | C_unshiu_00161 | 204509 | 214303 | 9795   | 2.63  | 98.07 |
| chr9 | 10155295 | 10163897 | 8603   | 0.06 | C_unshiu_00161 | 214296 | 222901 | 8606   | 2.31  | 99.13 |
| chr9 | 10162935 | 10164288 | 1354   | 0.01 | C_unshiu_00161 | 222061 | 223413 | 1353   | 0.36  | 98.82 |
| chr9 | 10164329 | 10170879 | 6551   | 0.05 | C_unshiu_00161 | 223408 | 229974 | 6567   | 1.77  | 99.41 |
| chr9 | 10170883 | 10181779 | 10897  | 0.08 | C_unshiu_00161 | 230362 | 241278 | 10917  | 2.93  | 99.66 |
| chr9 | 10187300 | 10193803 | 6504   | 0.05 | C_unshiu_00161 | 241274 | 247777 | 6504   | 1.75  | 99.97 |
| chr9 | 10195355 | 10198708 | 3354   | 0.02 | C_unshiu_00161 | 248282 | 251631 | 3350   | 0.9   | 99.46 |
| chr9 | 10198753 | 10200396 | 1644   | 0.01 | C_unshiu_00161 | 252301 | 253944 | 1644   | 0.44  | 99.39 |
| chr9 | 10200858 | 10222203 | 21346  | 0.15 | C_unshiu_00161 | 254639 | 276006 | 21368  | 5.74  | 99.53 |
| chr9 | 10223129 | 10228715 | 5587   | 0.04 | C_unshiu_00307 | 30343  | 35930  | 5588   | 2.13  | 99.18 |
| chr9 | 10242914 | 10262403 | 19490  | 0.14 | C_unshiu_00307 | 48628  | 68209  | 19582  | 7.48  | 98.51 |
| chr9 | 10263796 | 10265863 | 2068   | 0.01 | C_unshiu_00307 | 69506  | 71573  | 2068   | 0.79  | 100   |
| chr9 | 10267098 | 10268309 | 1212   | 0.01 | C_unshiu_00307 | 73177  | 74388  | 1212   | 0.46  | 99.75 |
| chr9 | 10269268 | 10297488 | 28221  | 0.2  | C_unshiu_00307 | 75639  | 103980 | 28342  | 10.83 | 99.07 |
| chr9 | 10297274 | 10302507 | 5234   | 0.04 | C_unshiu_00307 | 103856 | 109090 | 5235   | 2     | 99.62 |

|      |          |          |        |      |                |        |        |        |       |       |
|------|----------|----------|--------|------|----------------|--------|--------|--------|-------|-------|
| chr9 | 10302499 | 10329950 | 27452  | 0.19 | C_unshiu_00307 | 109536 | 137143 | 27608  | 10.55 | 99    |
| chr9 | 10329951 | 10332279 | 2329   | 0.02 | C_unshiu_00307 | 139369 | 141696 | 2328   | 0.89  | 99.96 |
| chr9 | 10334255 | 10380750 | 46496  | 0.32 | C_unshiu_00307 | 141699 | 188200 | 46502  | 17.76 | 99.78 |
| chr9 | 10382158 | 10395645 | 13488  | 0.09 | C_unshiu_00307 | 190285 | 203785 | 13501  | 5.16  | 99.73 |
| chr9 | 10396634 | 10418651 | 22018  | 0.15 | C_unshiu_00307 | 205015 | 227005 | 21991  | 8.4   | 99.5  |
| chr9 | 10418688 | 10431702 | 13015  | 0.09 | C_unshiu_00307 | 227002 | 240081 | 13080  | 5     | 98.63 |
| chr9 | 10437821 | 10443332 | 5512   | 0.04 | C_unshiu_00307 | 242037 | 247548 | 5512   | 2.11  | 99.49 |
| chr9 | 10443346 | 10444408 | 1063   | 0.01 | C_unshiu_01048 | 7577   | 8639   | 1063   | 1.06  | 99.62 |
| chr9 | 10446300 | 10448016 | 1717   | 0.01 | C_unshiu_01048 | 11086  | 12812  | 1727   | 1.72  | 98.96 |
| chr9 | 10446584 | 10450711 | 4128   | 0.03 | C_unshiu_00307 | 248338 | 252452 | 4115   | 1.57  | 98.43 |
| chr9 | 10450731 | 10474043 | 23313  | 0.16 | C_unshiu_01048 | 29235  | 52612  | 23378  | 23.28 | 99.36 |
| chr9 | 10474040 | 10481396 | 7357   | 0.05 | C_unshiu_01048 | 52856  | 60220  | 7365   | 7.33  | 99.28 |
| chr9 | 10482090 | 10499532 | 17443  | 0.12 | C_unshiu_01048 | 61537  | 78977  | 17441  | 17.37 | 99.82 |
| chr9 | 10500098 | 10507644 | 7547   | 0.05 | C_unshiu_01048 | 79769  | 87314  | 7546   | 7.51  | 99.87 |
| chr9 | 10515036 | 10519775 | 4740   | 0.03 | C_unshiu_02752 | 17914  | 13171  | 4744   | 24.95 | 98.39 |
| chr9 | 10553239 | 10566874 | 13636  | 0.1  | C_unshiu_01355 | 64551  | 50916  | 13636  | 18.47 | 99.9  |
| chr9 | 10567263 | 10579881 | 12619  | 0.09 | C_unshiu_01355 | 50095  | 37463  | 12633  | 17.11 | 98.81 |
| chr9 | 10585226 | 10587000 | 1775   | 0.01 | C_unshiu_01355 | 29581  | 27797  | 1785   | 2.42  | 98.88 |
| chr9 | 10639551 | 10654542 | 14992  | 0.1  | C_unshiu_01002 | 57424  | 72414  | 14991  | 14.17 | 99.61 |
| chr9 | 10654669 | 10672891 | 18223  | 0.13 | C_unshiu_01002 | 73084  | 91335  | 18252  | 17.25 | 99.28 |
| chr9 | 10673929 | 10676876 | 2948   | 0.02 | C_unshiu_02004 | 30496  | 27560  | 2937   | 7.25  | 98.78 |
| chr9 | 10679131 | 10681072 | 1942   | 0.01 | C_unshiu_01002 | 103883 | 105831 | 1949   | 1.84  | 98.61 |
| chr9 | 10707098 | 10710335 | 3238   | 0.02 | C_unshiu_02098 | 31932  | 28695  | 3238   | 8.87  | 100   |
| chr9 | 10720599 | 10722273 | 1675   | 0.01 | C_unshiu_01028 | 81934  | 80260  | 1675   | 1.62  | 100   |
| chr9 | 10724663 | 10730170 | 5508   | 0.04 | C_unshiu_01074 | 95162  | 89655  | 5508   | 5.59  | 99.93 |
| chr9 | 10730194 | 10737289 | 7096   | 0.05 | C_unshiu_01074 | 88835  | 81740  | 7096   | 7.2   | 99.97 |
| chr9 | 10743803 | 10745225 | 1423   | 0.01 | C_unshiu_00620 | 89920  | 88506  | 1415   | 0.87  | 98.59 |
| chr9 | 10745226 | 10752089 | 6864   | 0.05 | C_unshiu_00107 | 241230 | 248093 | 6864   | 1.54  | 99.99 |
| chr9 | 10753016 | 10754932 | 1917   | 0.01 | C_unshiu_00620 | 82940  | 81026  | 1915   | 1.17  | 98.23 |
| chr9 | 10757946 | 10760538 | 2593   | 0.02 | C_unshiu_00107 | 253218 | 255811 | 2594   | 0.58  | 98.8  |
| chr9 | 10763477 | 10769994 | 6518   | 0.05 | C_unshiu_00107 | 257293 | 263810 | 6518   | 1.46  | 100   |
| chr9 | 10774533 | 10922991 | 148459 | 1.04 | C_unshiu_00107 | 267663 | 416121 | 148459 | 33.2  | 100   |
| chr9 | 10923012 | 10953747 | 30736  | 0.21 | C_unshiu_00107 | 416433 | 447148 | 30716  | 6.87  | 99.78 |
| chr9 | 10955424 | 10957844 | 2421   | 0.02 | C_unshiu_00122 | 1      | 2421   | 2421   | 0.57  | 100   |
| chr9 | 10959892 | 11093204 | 133313 | 0.93 | C_unshiu_00122 | 3583   | 136873 | 133291 | 31.65 | 99.94 |
| chr9 | 11093224 | 11094508 | 1285   | 0.01 | C_unshiu_00122 | 137305 | 138589 | 1285   | 0.31  | 99.92 |
| chr9 | 11093224 | 11094508 | 1285   | 0.01 | C_unshiu_03089 | 4366   | 3080   | 1287   | 13.21 | 98.21 |
| chr9 | 11097209 | 11098711 | 1503   | 0.01 | C_unshiu_01363 | 233    | 1735   | 1503   | 2.05  | 98.27 |
| chr9 | 11099495 | 11102516 | 3022   | 0.02 | C_unshiu_00122 | 142701 | 145722 | 3022   | 0.72  | 100   |
| chr9 | 11104456 | 11123930 | 19475  | 0.14 | C_unshiu_00122 | 145976 | 165483 | 19508  | 4.63  | 99.74 |
| chr9 | 11125381 | 11147503 | 22123  | 0.15 | C_unshiu_00122 | 170338 | 192556 | 22219  | 5.28  | 99.41 |
| chr9 | 11147519 | 11206194 | 58676  | 0.41 | C_unshiu_00122 | 193596 | 252281 | 58686  | 13.94 | 99.98 |
| chr9 | 11206179 | 11237843 | 31665  | 0.22 | C_unshiu_00122 | 252303 | 283941 | 31639  | 7.51  | 99.92 |
| chr9 | 11217850 | 11282785 | 64936  | 0.45 | C_unshiu_00122 | 263974 | 328870 | 64897  | 15.41 | 99.89 |
| chr9 | 11287808 | 11367820 | 80013  | 0.56 | C_unshiu_00122 | 333109 | 413102 | 79994  | 19    | 99.93 |
| chr9 | 11378279 | 11398925 | 20647  | 0.14 | C_unshiu_02358 | 3627   | 24244  | 20618  | 73.22 | 99.73 |
| chr9 | 11398979 | 11402791 | 3813   | 0.03 | C_unshiu_02358 | 24346  | 28158  | 3813   | 13.54 | 100   |
| chr9 | 11422145 | 11430209 | 8065   | 0.06 | C_unshiu_01280 | 42134  | 34073  | 8062   | 10.24 | 99.47 |
| chr9 | 11434667 | 11455389 | 20723  | 0.14 | C_unshiu_00972 | 59399  | 38689  | 20711  | 18.95 | 99.73 |
| chr9 | 11458407 | 11460748 | 2342   | 0.02 | C_unshiu_00697 | 74951  | 77292  | 2342   | 1.63  | 99.87 |
| chr9 | 11467757 | 11469560 | 1804   | 0.01 | C_unshiu_00697 | 84754  | 86559  | 1806   | 1.25  | 98.01 |
| chr9 | 11471003 | 11475621 | 4619   | 0.03 | C_unshiu_00697 | 87120  | 91749  | 4630   | 3.22  | 98.16 |
| chr9 | 11475894 | 11477111 | 1218   | 0.01 | C_unshiu_00697 | 92313  | 93538  | 1226   | 0.85  | 99.18 |
| chr9 | 11477123 | 11489067 | 11945  | 0.08 | C_unshiu_00697 | 93796  | 105741 | 11946  | 8.3   | 98.45 |
| chr9 | 11507137 | 11513484 | 6348   | 0.04 | C_unshiu_00697 | 119527 | 125857 | 6331   | 4.4   | 98.16 |
| chr9 | 11515643 | 11518257 | 2615   | 0.02 | C_unshiu_00697 | 126135 | 128751 | 2617   | 1.82  | 98.97 |
| chr9 | 11525399 | 11530040 | 4642   | 0.03 | C_unshiu_01227 | 1      | 4662   | 4662   | 5.64  | 98.61 |
| chr9 | 11529887 | 11535078 | 5192   | 0.04 | C_unshiu_00697 | 135758 | 140955 | 5198   | 3.61  | 99.52 |
| chr9 | 11536763 | 11538616 | 1854   | 0.01 | C_unshiu_01227 | 9856   | 11703  | 1848   | 2.23  | 99.14 |
| chr9 | 11538641 | 11552242 | 13602  | 0.09 | C_unshiu_01227 | 11932  | 25537  | 13606  | 16.45 | 98.21 |
| chr9 | 11553521 | 11557175 | 3655   | 0.03 | C_unshiu_02599 | 19090  | 15433  | 3658   | 16.55 | 99.26 |
| chr9 | 11558896 | 11563664 | 4769   | 0.03 | C_unshiu_02599 | 14978  | 10185  | 4794   | 21.69 | 98.1  |
| chr9 | 11582725 | 11593018 | 10294  | 0.07 | C_unshiu_00388 | 13107  | 23429  | 10323  | 4.57  | 98.23 |
| chr9 | 11615409 | 11620638 | 5230   | 0.04 | C_unshiu_00388 | 48204  | 53430  | 5227   | 2.32  | 99.1  |
| chr9 | 11622313 | 11630211 | 7899   | 0.06 | C_unshiu_02643 | 11513  | 3624   | 7890   | 37.44 | 99.34 |
| chr9 | 11634607 | 11679624 | 45018  | 0.31 | C_unshiu_00388 | 56645  | 101695 | 45051  | 19.96 | 98.8  |
| chr9 | 11679623 | 11685749 | 6127   | 0.04 | C_unshiu_00388 | 101729 | 107861 | 6133   | 2.72  | 99.28 |
| chr9 | 11685753 | 11692322 | 6570   | 0.05 | C_unshiu_00388 | 108096 | 114680 | 6585   | 2.92  | 98.55 |
| chr9 | 11707358 | 11715610 | 8253   | 0.06 | C_unshiu_00388 | 130188 | 138479 | 8292   | 3.67  | 98.33 |
| chr9 | 11720310 | 11728382 | 8073   | 0.06 | C_unshiu_00399 | 23804  | 15698  | 8107   | 3.63  | 98.72 |
| chr9 | 11733510 | 11743403 | 9894   | 0.07 | C_unshiu_00399 | 40086  | 49996  | 9911   | 4.44  | 98.67 |
| chr9 | 11761102 | 11774309 | 13208  | 0.09 | C_unshiu_00399 | 65877  | 79095  | 13219  | 5.92  | 98.46 |
| chr9 | 11776737 | 11779058 | 2322   | 0.02 | C_unshiu_00399 | 81314  | 83643  | 2330   | 1.04  | 99.27 |
| chr9 | 11782574 | 11785993 | 3420   | 0.02 | C_unshiu_00399 | 85711  | 89154  | 3444   | 1.54  | 98.49 |
| chr9 | 11789423 | 11803095 | 13673  | 0.1  | C_unshiu_00399 | 94843  | 108578 | 13736  | 6.15  | 98.37 |
| chr9 | 11803316 | 11806086 | 2771   | 0.02 | C_unshiu_00399 | 108808 | 111583 | 2776   | 1.24  | 99.64 |
| chr9 | 11806106 | 11811080 | 4975   | 0.03 | C_unshiu_00399 | 112143 | 117150 | 5008   | 2.24  | 98.01 |
| chr9 | 11835398 | 11845941 | 10544  | 0.07 | C_unshiu_00399 | 141167 | 151765 | 10599  | 4.75  | 98.39 |
| chr9 | 11845939 | 11855273 | 9335   | 0.07 | C_unshiu_00399 | 151807 | 161156 | 9350   | 4.19  | 98.06 |

|      |          |          |       |      |                |        |        |       |       |       |
|------|----------|----------|-------|------|----------------|--------|--------|-------|-------|-------|
| chr9 | 11876434 | 11881860 | 5427  | 0.04 | C_unshiu_00399 | 182111 | 187561 | 5451  | 2.44  | 99.19 |
| chr9 | 11884728 | 11886294 | 1567  | 0.01 | C_unshiu_01604 | 29354  | 27778  | 1577  | 2.76  | 99.37 |
| chr9 | 11886596 | 11890604 | 4009  | 0.03 | C_unshiu_01604 | 27144  | 23135  | 4010  | 7.01  | 99.98 |
| chr9 | 11892861 | 11928856 | 35996 | 0.25 | C_unshiu_00141 | 556    | 36367  | 35812 | 8.92  | 99.1  |
| chr9 | 11930431 | 11941381 | 10951 | 0.08 | C_unshiu_00141 | 36560  | 47452  | 10893 | 2.71  | 99.12 |
| chr9 | 11941156 | 11950974 | 9819  | 0.07 | C_unshiu_00141 | 47316  | 57135  | 9820  | 2.45  | 99.73 |
| chr9 | 11947970 | 11987962 | 39993 | 0.28 | C_unshiu_00389 | 181919 | 141901 | 40019 | 17.75 | 98.73 |
| chr9 | 11988976 | 11990770 | 1795  | 0.01 | C_unshiu_00455 | 8702   | 6908   | 1795  | 0.87  | 99.78 |
| chr9 | 11989392 | 12002452 | 13061 | 0.09 | C_unshiu_00389 | 141397 | 128329 | 13069 | 5.8   | 99.59 |
| chr9 | 12009344 | 12014432 | 5089  | 0.04 | C_unshiu_00389 | 121017 | 115982 | 5036  | 2.23  | 98.31 |
| chr9 | 12014453 | 12016344 | 1892  | 0.01 | C_unshiu_00389 | 115308 | 113432 | 1877  | 0.83  | 98.42 |
| chr9 | 12016360 | 12020301 | 3942  | 0.03 | C_unshiu_00389 | 113079 | 109137 | 3943  | 1.75  | 99.59 |
| chr9 | 12020300 | 12028706 | 8407  | 0.06 | C_unshiu_00389 | 109206 | 100765 | 8442  | 3.74  | 98.97 |
| chr9 | 12034161 | 12054737 | 20577 | 0.14 | C_unshiu_00389 | 100763 | 80322  | 20442 | 9.07  | 98.55 |
| chr9 | 12060210 | 12071110 | 10901 | 0.08 | C_unshiu_00040 | 347267 | 336376 | 10892 | 1.65  | 99.36 |
| chr9 | 12071257 | 12075361 | 4105  | 0.03 | C_unshiu_00040 | 335811 | 331707 | 4105  | 0.62  | 99.88 |
| chr9 | 12077227 | 12084184 | 6958  | 0.05 | C_unshiu_00040 | 331142 | 324178 | 6965  | 1.06  | 99.07 |
| chr9 | 12084285 | 12086284 | 2000  | 0.01 | C_unshiu_01854 | 35226  | 37235  | 2010  | 4.34  | 99.05 |
| chr9 | 12085269 | 12087037 | 1769  | 0.01 | C_unshiu_02100 | 30919  | 32689  | 1771  | 4.85  | 99.49 |
| chr9 | 12111446 | 12143695 | 32250 | 0.23 | C_unshiu_00436 | 195136 | 162824 | 32313 | 15.18 | 99.52 |
| chr9 | 12143695 | 12150756 | 7062  | 0.05 | C_unshiu_00436 | 162692 | 155630 | 7063  | 3.32  | 99.63 |
| chr9 | 12150760 | 12161306 | 10547 | 0.07 | C_unshiu_00436 | 155390 | 144829 | 10562 | 4.96  | 99.26 |
| chr9 | 12163171 | 12164432 | 1262  | 0.01 | C_unshiu_00436 | 142168 | 140904 | 1265  | 0.59  | 99.05 |
| chr9 | 12166499 | 12236303 | 69805 | 0.49 | C_unshiu_00436 | 138105 | 68291  | 69815 | 32.79 | 99.2  |
| chr9 | 12236671 | 12240875 | 4205  | 0.03 | C_unshiu_00436 | 67592  | 63385  | 4208  | 1.98  | 99.24 |
| chr9 | 12241034 | 12252986 | 11953 | 0.08 | C_unshiu_00436 | 63216  | 51263  | 11954 | 5.61  | 98.53 |
| chr9 | 12254204 | 12260411 | 6208  | 0.04 | C_unshiu_00436 | 51255  | 45045  | 6211  | 2.92  | 99.66 |
| chr9 | 12260424 | 12278267 | 17844 | 0.12 | C_unshiu_00436 | 44569  | 26718  | 17852 | 8.38  | 99.75 |
| chr9 | 12288869 | 12302209 | 13341 | 0.09 | C_unshiu_00436 | 25647  | 12308  | 13340 | 6.27  | 99.88 |
| chr9 | 12306177 | 12310341 | 4165  | 0.03 | C_unshiu_00298 | 1      | 4165   | 4165  | 1.56  | 99.95 |
| chr9 | 12310467 | 12312618 | 2152  | 0.02 | C_unshiu_00298 | 4332   | 6485   | 2154  | 0.81  | 99.68 |
| chr9 | 12312932 | 12321010 | 8079  | 0.06 | C_unshiu_00298 | 7248   | 15319  | 8072  | 3.03  | 98.19 |
| chr9 | 12321015 | 12322368 | 1354  | 0.01 | C_unshiu_01537 | 58320  | 59673  | 1354  | 2.21  | 100   |
| chr9 | 12322393 | 12335558 | 13166 | 0.09 | C_unshiu_00298 | 15254  | 28345  | 13092 | 4.91  | 99.22 |
| chr9 | 12337944 | 12339130 | 1187  | 0.01 | C_unshiu_00298 | 32459  | 33646  | 1188  | 0.45  | 99.41 |
| chr9 | 12339148 | 12347444 | 8297  | 0.06 | C_unshiu_00298 | 34046  | 42308  | 8263  | 3.1   | 99.13 |
| chr9 | 12347634 | 12348958 | 1325  | 0.01 | C_unshiu_00298 | 42973  | 44300  | 1328  | 0.5   | 99.25 |
| chr9 | 12352870 | 12385604 | 32735 | 0.23 | C_unshiu_00298 | 45049  | 77866  | 32818 | 12.3  | 99.3  |
| chr9 | 12386763 | 12406172 | 19410 | 0.14 | C_unshiu_00298 | 79424  | 98833  | 19410 | 7.28  | 99.14 |
| chr9 | 12406353 | 12465368 | 59016 | 0.41 | C_unshiu_00298 | 99622  | 158669 | 59048 | 22.13 | 99.56 |
| chr9 | 12472448 | 12476816 | 4369  | 0.03 | C_unshiu_02879 | 928    | 5329   | 4402  | 27.1  | 98.75 |
| chr9 | 12476830 | 12481002 | 4173  | 0.03 | C_unshiu_02123 | 22623  | 18451  | 4173  | 11.65 | 99.98 |
| chr9 | 12476832 | 12481002 | 4171  | 0.03 | C_unshiu_00101 | 176026 | 180208 | 4183  | 0.92  | 99.69 |
| chr9 | 12481569 | 12485388 | 3820  | 0.03 | C_unshiu_00101 | 181168 | 184987 | 3820  | 0.84  | 99.87 |
| chr9 | 12486072 | 12492809 | 6738  | 0.05 | C_unshiu_00101 | 186464 | 193217 | 6754  | 1.48  | 99.3  |
| chr9 | 12493149 | 12498082 | 4934  | 0.03 | C_unshiu_00101 | 194201 | 199121 | 4921  | 1.08  | 99.51 |
| chr9 | 12498074 | 12502880 | 4807  | 0.03 | C_unshiu_00101 | 199263 | 204093 | 4831  | 1.06  | 98.95 |
| chr9 | 12503382 | 12537425 | 34044 | 0.24 | C_unshiu_00101 | 204576 | 238681 | 34106 | 7.48  | 99.53 |
| chr9 | 12537424 | 12548179 | 10756 | 0.08 | C_unshiu_00101 | 239226 | 249986 | 10761 | 2.36  | 99.56 |
| chr9 | 12548196 | 12557572 | 9377  | 0.07 | C_unshiu_00101 | 250419 | 259853 | 9435  | 2.07  | 98.63 |
| chr9 | 12561280 | 12653825 | 92546 | 0.65 | C_unshiu_00101 | 263998 | 356560 | 92563 | 20.31 | 99.5  |
| chr9 | 12654026 | 12666924 | 12899 | 0.09 | C_unshiu_00101 | 356870 | 369794 | 12925 | 2.84  | 99.15 |
| chr9 | 12667423 | 12669169 | 1747  | 0.01 | C_unshiu_00101 | 369790 | 371536 | 1747  | 0.38  | 99.03 |
| chr9 | 12675829 | 12714575 | 38747 | 0.27 | C_unshiu_00101 | 383941 | 422534 | 38594 | 8.47  | 98.81 |
| chr9 | 12717120 | 12741644 | 24525 | 0.17 | C_unshiu_00101 | 426679 | 451204 | 24526 | 5.38  | 99.83 |
| chr9 | 12743332 | 12748401 | 5070  | 0.04 | C_unshiu_00647 | 130666 | 125622 | 5045  | 3.2   | 98.56 |
| chr9 | 12773875 | 12777404 | 3530  | 0.02 | C_unshiu_00647 | 100077 | 96548  | 3530  | 2.24  | 100   |
| chr9 | 12778060 | 12793701 | 15642 | 0.11 | C_unshiu_00647 | 95336  | 79617  | 15720 | 9.98  | 98.32 |
| chr9 | 12795516 | 12799184 | 3669  | 0.03 | C_unshiu_00647 | 76263  | 72599  | 3665  | 2.33  | 99.32 |
| chr9 | 12801747 | 12803778 | 2032  | 0.01 | C_unshiu_00647 | 71839  | 69802  | 2038  | 1.29  | 99.17 |
| chr9 | 12815012 | 12821034 | 6023  | 0.04 | C_unshiu_00647 | 58853  | 52826  | 6028  | 3.83  | 98.99 |
| chr9 | 12821042 | 12834249 | 13208 | 0.09 | C_unshiu_00647 | 52699  | 39489  | 13211 | 8.39  | 99.92 |
| chr9 | 12846683 | 12854626 | 7944  | 0.06 | C_unshiu_00647 | 27616  | 19646  | 7971  | 5.06  | 98.32 |
| chr9 | 12857847 | 12867476 | 9630  | 0.07 | C_unshiu_00819 | 126570 | 116946 | 9625  | 7.6   | 98.59 |
| chr9 | 12868499 | 12873333 | 4835  | 0.03 | C_unshiu_00819 | 115572 | 110748 | 4825  | 3.81  | 99.44 |
| chr9 | 12873344 | 12883268 | 9925  | 0.07 | C_unshiu_01479 | 45598  | 55538  | 9941  | 15.42 | 99.18 |
| chr9 | 12885619 | 12889599 | 3981  | 0.03 | C_unshiu_00819 | 107099 | 103119 | 3981  | 3.15  | 98.67 |
| chr9 | 12889697 | 12905825 | 16129 | 0.11 | C_unshiu_00819 | 102576 | 86402  | 16175 | 12.78 | 98.93 |
| chr9 | 12909795 | 12912732 | 2938  | 0.02 | C_unshiu_00243 | 128947 | 126034 | 2914  | 0.97  | 98.61 |
| chr9 | 12911923 | 12917648 | 5726  | 0.04 | C_unshiu_00263 | 94851  | 100605 | 5755  | 2.02  | 98.61 |
| chr9 | 12956612 | 12959322 | 2711  | 0.02 | C_unshiu_00263 | 144556 | 147258 | 2703  | 0.95  | 98.38 |
| chr9 | 12962076 | 12976544 | 14469 | 0.1  | C_unshiu_00263 | 148704 | 163171 | 14468 | 5.08  | 98.37 |
| chr9 | 12976538 | 12978121 | 1584  | 0.01 | C_unshiu_00263 | 163315 | 164901 | 1587  | 0.56  | 99.06 |
| chr9 | 12978635 | 12990999 | 12365 | 0.09 | C_unshiu_00263 | 165995 | 178342 | 12348 | 4.33  | 99.35 |
| chr9 | 12991028 | 12993092 | 2065  | 0.01 | C_unshiu_00263 | 178672 | 180730 | 2059  | 0.72  | 98.94 |
| chr9 | 12999070 | 13020357 | 21288 | 0.15 | C_unshiu_00263 | 181744 | 203040 | 21297 | 7.47  | 99.89 |
| chr9 | 13022033 | 13030424 | 8392  | 0.06 | C_unshiu_00254 | 25067  | 33458  | 8392  | 2.85  | 99.39 |
| chr9 | 13033069 | 13034190 | 1122  | 0.01 | C_unshiu_00254 | 41143  | 42264  | 1122  | 0.38  | 99.11 |
| chr9 | 13034455 | 13037269 | 2815  | 0.02 | C_unshiu_00254 | 38409  | 41223  | 2815  | 0.96  | 100   |

|      |          |          |       |      |                |        |        |       |       |       |
|------|----------|----------|-------|------|----------------|--------|--------|-------|-------|-------|
| chr9 | 13038601 | 13039863 | 1263  | 0.01 | C_unshiu_00178 | 140257 | 141519 | 1263  | 0.35  | 100   |
| chr9 | 13042164 | 13048776 | 6613  | 0.05 | C_unshiu_00254 | 45820  | 52432  | 6613  | 2.25  | 99.64 |
| chr9 | 13048761 | 13062249 | 13489 | 0.09 | C_unshiu_00254 | 58319  | 71831  | 13513 | 4.59  | 99.11 |
| chr9 | 13077882 | 13080902 | 3021  | 0.02 | C_unshiu_00254 | 84745  | 87766  | 3022  | 1.03  | 99.4  |
| chr9 | 13081020 | 13082226 | 1207  | 0.01 | C_unshiu_00254 | 86617  | 87825  | 1209  | 0.41  | 99.83 |
| chr9 | 13085482 | 13097970 | 12489 | 0.09 | C_unshiu_00254 | 90165  | 102641 | 12477 | 4.24  | 99.54 |
| chr9 | 13097986 | 13099841 | 1856  | 0.01 | C_unshiu_00254 | 103311 | 105167 | 1857  | 0.63  | 99.14 |
| chr9 | 13101567 | 13178204 | 76638 | 0.53 | C_unshiu_00254 | 106276 | 182879 | 76604 | 26.02 | 99.36 |
| chr9 | 13180689 | 13194680 | 13992 | 0.1  | C_unshiu_00254 | 184822 | 198750 | 13929 | 4.73  | 99.25 |
| chr9 | 13196653 | 13197684 | 1032  | 0.01 | C_unshiu_00145 | 48514  | 49546  | 1033  | 0.26  | 98.55 |
| chr9 | 13206226 | 13286916 | 80691 | 0.56 | C_unshiu_00254 | 209304 | 290040 | 80737 | 27.43 | 99.32 |
| chr9 | 13286676 | 13291086 | 4411  | 0.03 | C_unshiu_00369 | 85567  | 81166  | 4402  | 1.89  | 99.09 |
| chr9 | 13294667 | 13298098 | 3432  | 0.02 | C_unshiu_00254 | 290942 | 294361 | 3420  | 1.16  | 99.45 |
| chr9 | 13312271 | 13316534 | 4264  | 0.03 | C_unshiu_00369 | 71501  | 67230  | 4272  | 1.84  | 98.67 |
| chr9 | 13317102 | 13346762 | 29661 | 0.21 | C_unshiu_00369 | 66349  | 36669  | 29681 | 12.76 | 99.43 |
| chr9 | 13346656 | 13383297 | 36642 | 0.26 | C_unshiu_00369 | 36679  | 1      | 36679 | 15.77 | 99.55 |
| chr9 | 13375894 | 13401906 | 26013 | 0.18 | C_unshiu_01588 | 552    | 26556  | 26005 | 44.62 | 99.71 |
| chr9 | 13401966 | 13412479 | 10514 | 0.07 | C_unshiu_01588 | 26551  | 37111  | 10561 | 18.12 | 99.17 |
| chr9 | 13415508 | 13435203 | 19696 | 0.14 | C_unshiu_01588 | 38556  | 58276  | 19721 | 33.84 | 99.71 |
| chr9 | 13443707 | 13453499 | 9793  | 0.07 | C_unshiu_00340 | 160398 | 170188 | 9791  | 3.92  | 99.89 |
| chr9 | 13465697 | 13499712 | 34016 | 0.24 | C_unshiu_00340 | 194590 | 228604 | 34015 | 13.63 | 99.7  |
| chr9 | 13498276 | 13504100 | 5825  | 0.04 | C_unshiu_01084 | 63731  | 57921  | 5811  | 5.96  | 98.22 |
| chr9 | 13514158 | 13518424 | 4267  | 0.03 | C_unshiu_01283 | 1      | 4295   | 4295  | 5.47  | 98.47 |
| chr9 | 13519863 | 13522315 | 2453  | 0.02 | C_unshiu_01283 | 6434   | 8886   | 2453  | 3.12  | 99.14 |
| chr9 | 13522770 | 13525772 | 3003  | 0.02 | C_unshiu_01283 | 9867   | 12869  | 3003  | 3.82  | 99.8  |
| chr9 | 13529696 | 13539833 | 10138 | 0.07 | C_unshiu_01283 | 12963  | 23178  | 10216 | 13.01 | 98.48 |
| chr9 | 13535161 | 13554708 | 19548 | 0.14 | C_unshiu_01084 | 29799  | 10212  | 19588 | 20.07 | 98.73 |
| chr9 | 13549513 | 13556515 | 7003  | 0.05 | C_unshiu_01283 | 23262  | 30263  | 7002  | 8.91  | 99.7  |
| chr9 | 13556529 | 13559025 | 2497  | 0.02 | C_unshiu_01283 | 30748  | 33254  | 2507  | 3.19  | 98.21 |
| chr9 | 13563573 | 13574333 | 10761 | 0.08 | C_unshiu_01283 | 40456  | 51252  | 10797 | 13.75 | 99.01 |
| chr9 | 13574539 | 13575724 | 1186  | 0.01 | C_unshiu_01197 | 58299  | 59484  | 1186  | 1.38  | 100   |
| chr9 | 13576655 | 13580430 | 3776  | 0.03 | C_unshiu_01283 | 52478  | 56254  | 3777  | 4.81  | 99.39 |
| chr9 | 13584865 | 13595388 | 10524 | 0.07 | C_unshiu_01283 | 62744  | 73298  | 10555 | 13.44 | 98.91 |
| chr9 | 13597672 | 13612229 | 14558 | 0.1  | C_unshiu_01405 | 62838  | 48277  | 14562 | 20.75 | 98.47 |
| chr9 | 13623969 | 13654671 | 30703 | 0.21 | C_unshiu_00040 | 657269 | 626582 | 30688 | 4.66  | 99.31 |
| chr9 | 13655911 | 13661095 | 5185  | 0.04 | C_unshiu_00040 | 626527 | 621348 | 5180  | 0.79  | 99.1  |
| chr9 | 13675666 | 13685341 | 9676  | 0.07 | C_unshiu_00040 | 618234 | 608556 | 9679  | 1.47  | 99.79 |
| chr9 | 13689689 | 13692503 | 2815  | 0.02 | C_unshiu_00040 | 604856 | 602031 | 2826  | 0.43  | 99.01 |
| chr9 | 13696618 | 13701040 | 4423  | 0.03 | C_unshiu_00040 | 597941 | 593518 | 4424  | 0.67  | 99.5  |
| chr9 | 13701193 | 13714672 | 13480 | 0.09 | C_unshiu_00040 | 593332 | 579852 | 13481 | 2.05  | 99.87 |
| chr9 | 13714728 | 13757204 | 42477 | 0.3  | C_unshiu_00040 | 579746 | 537236 | 42511 | 6.45  | 99.58 |
| chr9 | 13757221 | 13758532 | 1312  | 0.01 | C_unshiu_00040 | 537261 | 535941 | 1321  | 0.2   | 98.64 |
| chr9 | 13759921 | 13763037 | 3117  | 0.02 | C_unshiu_00040 | 535947 | 532832 | 3116  | 0.47  | 98.4  |
| chr9 | 13763030 | 13767326 | 4297  | 0.03 | C_unshiu_00040 | 531944 | 527627 | 4318  | 0.66  | 99.05 |
| chr9 | 13767347 | 13768533 | 1187  | 0.01 | C_unshiu_00040 | 525437 | 524251 | 1187  | 0.18  | 100   |
| chr9 | 13767992 | 13778516 | 10525 | 0.07 | C_unshiu_00040 | 519859 | 509322 | 10538 | 1.6   | 99.57 |
| chr9 | 13786241 | 13794267 | 8027  | 0.06 | C_unshiu_00473 | 101228 | 109258 | 8031  | 4     | 99.34 |
| chr9 | 13794271 | 13796434 | 2164  | 0.02 | C_unshiu_01603 | 52115  | 54269  | 2155  | 3.76  | 98.15 |
| chr9 | 13799068 | 13800846 | 1779  | 0.01 | C_unshiu_01207 | 74576  | 76354  | 1779  | 2.1   | 98.43 |
| chr9 | 13802681 | 13804004 | 1324  | 0.01 | C_unshiu_01438 | 17613  | 16290  | 1324  | 1.96  | 99.92 |
| chr9 | 13804833 | 13806253 | 1421  | 0.01 | C_unshiu_01438 | 15476  | 14056  | 1421  | 2.1   | 99.93 |
| chr9 | 13808501 | 13814485 | 5985  | 0.04 | C_unshiu_01603 | 41734  | 35735  | 6000  | 10.46 | 99.53 |
| chr9 | 13815229 | 13824158 | 8930  | 0.06 | C_unshiu_01603 | 34524  | 25620  | 8905  | 15.52 | 99.07 |
| chr9 | 13824628 | 13844024 | 19397 | 0.14 | C_unshiu_01603 | 24669  | 5236   | 19434 | 33.87 | 99.52 |
| chr9 | 13843558 | 13847195 | 3638  | 0.03 | C_unshiu_01603 | 4997   | 1349   | 3649  | 6.36  | 99.62 |
| chr9 | 13856488 | 13861553 | 5066  | 0.04 | C_unshiu_02789 | 9658   | 4593   | 5066  | 27.98 | 99.98 |
| chr9 | 13865570 | 13867031 | 1462  | 0.01 | C_unshiu_01166 | 57714  | 59175  | 1462  | 1.64  | 100   |
| chr9 | 13877435 | 13881908 | 4474  | 0.03 | C_unshiu_00473 | 119693 | 124172 | 4480  | 2.23  | 98.24 |
| chr9 | 13883396 | 13912904 | 29509 | 0.21 | C_unshiu_00473 | 126240 | 155789 | 29550 | 14.71 | 99.46 |
| chr9 | 13912899 | 13929221 | 16323 | 0.11 | C_unshiu_00473 | 156440 | 172812 | 16373 | 8.15  | 98.47 |
| chr9 | 13929214 | 13939063 | 9850  | 0.07 | C_unshiu_00473 | 173933 | 183807 | 9875  | 4.91  | 98.96 |
| chr9 | 13939088 | 13945253 | 6166  | 0.04 | C_unshiu_00473 | 183980 | 190190 | 6211  | 3.09  | 98.06 |
| chr9 | 13954334 | 13956855 | 2522  | 0.02 | C_unshiu_00779 | 90327  | 87793  | 2535  | 1.93  | 98.27 |
| chr9 | 13957453 | 13965294 | 7842  | 0.05 | C_unshiu_00779 | 87780  | 79850  | 7931  | 6.05  | 98.25 |
| chr9 | 13965324 | 13990495 | 25172 | 0.18 | C_unshiu_00779 | 79976  | 54751  | 25226 | 19.23 | 98.57 |
| chr9 | 14015282 | 14016756 | 1475  | 0.01 | C_unshiu_00779 | 28774  | 27296  | 1479  | 1.13  | 99.66 |
| chr9 | 14016786 | 14021673 | 4888  | 0.03 | C_unshiu_00779 | 27412  | 22537  | 4876  | 3.72  | 99.31 |
| chr9 | 14021872 | 14023269 | 1398  | 0.01 | C_unshiu_00779 | 21638  | 20241  | 1398  | 1.07  | 100   |
| chr9 | 14025174 | 14033088 | 7915  | 0.06 | C_unshiu_00779 | 19142  | 11205  | 7938  | 6.05  | 98.78 |
| chr9 | 14034307 | 14038598 | 4292  | 0.03 | C_unshiu_00779 | 10450  | 6155   | 4296  | 3.27  | 99.4  |
| chr9 | 14056905 | 14059340 | 2436  | 0.02 | C_unshiu_00284 | 73092  | 70659  | 2434  | 0.89  | 98.56 |
| chr9 | 14058883 | 14084353 | 25471 | 0.18 | C_unshiu_00284 | 93980  | 119411 | 25432 | 9.26  | 98.81 |
| chr9 | 14084353 | 14110441 | 26089 | 0.18 | C_unshiu_00284 | 119519 | 145631 | 26113 | 9.51  | 99.07 |
| chr9 | 14111773 | 14115724 | 3952  | 0.03 | C_unshiu_00284 | 147391 | 151344 | 3954  | 1.44  | 99.24 |
| chr9 | 14115751 | 14127247 | 11497 | 0.08 | C_unshiu_00284 | 151726 | 163298 | 11573 | 4.21  | 98.88 |
| chr9 | 14127231 | 14151458 | 24228 | 0.17 | C_unshiu_00284 | 163631 | 187896 | 24266 | 8.84  | 98.85 |
| chr9 | 14151422 | 14155581 | 4160  | 0.03 | C_unshiu_00284 | 187898 | 192037 | 4140  | 1.51  | 98.66 |
| chr9 | 14155757 | 14169882 | 14126 | 0.1  | C_unshiu_00284 | 192194 | 206376 | 14183 | 5.17  | 98.75 |
| chr9 | 14170153 | 14172893 | 2741  | 0.02 | C_unshiu_00284 | 209674 | 212415 | 2742  | 1     | 99.85 |

|               |          |          |        |      |                |        |        |        |       |       |
|---------------|----------|----------|--------|------|----------------|--------|--------|--------|-------|-------|
| chr9          | 14172820 | 14218618 | 45799  | 0.32 | C_unshiu_00284 | 212379 | 258343 | 45965  | 16.74 | 98.98 |
| chr9          | 14222690 | 14226934 | 4245   | 0.03 | C_unshiu_00284 | 261393 | 265663 | 4271   | 1.56  | 98.78 |
| chr9          | 14227661 | 14230342 | 2682   | 0.02 | C_unshiu_00284 | 266015 | 268702 | 2688   | 0.98  | 99.26 |
| chr9          | 14241771 | 14247906 | 6136   | 0.04 | C_unshiu_02528 | 872    | 7016   | 6145   | 25.7  | 99.04 |
| chr9          | 14248346 | 14250314 | 1969   | 0.01 | C_unshiu_02528 | 6940   | 8909   | 1970   | 8.24  | 99.54 |
| chr9          | 14251233 | 14254025 | 2793   | 0.02 | C_unshiu_02528 | 10961  | 13754  | 2794   | 11.69 | 99.86 |
| chr9          | 14260941 | 14262152 | 1212   | 0.01 | C_unshiu_00034 | 263668 | 262456 | 1213   | 0.17  | 99.34 |
| chr9          | 14263938 | 14265730 | 1793   | 0.01 | C_unshiu_00034 | 260114 | 258323 | 1792   | 0.26  | 99.94 |
| chr9          | 14303386 | 14309431 | 6046   | 0.04 | C_unshiu_00308 | 233447 | 239492 | 6046   | 2.31  | 98.93 |
| chr9          | 14313823 | 14315542 | 1720   | 0.01 | C_unshiu_00308 | 244694 | 246410 | 1717   | 0.66  | 99.71 |
| chr9          | 14316019 | 14317624 | 1606   | 0.01 | C_unshiu_00308 | 246854 | 248459 | 1606   | 0.61  | 99.94 |
| chr9          | 14317625 | 14318682 | 1058   | 0.01 | C_unshiu_00446 | 78179  | 77122  | 1058   | 0.51  | 100   |
| scaffold00016 | 1        | 4078     | 4078   | 0.21 | C_unshiu_00792 | 64577  | 60498  | 4080   | 3.16  | 99.27 |
| scaffold00016 | 4089     | 26644    | 22556  | 1.17 | C_unshiu_00792 | 39680  | 17125  | 22556  | 17.45 | 99.96 |
| scaffold00016 | 36394    | 37557    | 1164   | 0.06 | C_unshiu_00476 | 115728 | 116893 | 1166   | 0.58  | 98.11 |
| scaffold00016 | 41436    | 43489    | 2054   | 0.11 | C_unshiu_01710 | 1      | 2034   | 2034   | 3.91  | 98.69 |
| scaffold00016 | 44037    | 49328    | 5292   | 0.27 | C_unshiu_01710 | 2970   | 8264   | 5295   | 10.17 | 99.64 |
| scaffold00016 | 54416    | 58397    | 3982   | 0.21 | C_unshiu_01710 | 13029  | 17047  | 4019   | 7.72  | 98.83 |
| scaffold00016 | 60335    | 67084    | 6750   | 0.35 | C_unshiu_01710 | 19577  | 26322  | 6746   | 12.96 | 99.59 |
| scaffold00016 | 68428    | 70530    | 2103   | 0.11 | C_unshiu_02637 | 19307  | 17212  | 2096   | 9.87  | 99.19 |
| scaffold00016 | 70525    | 79222    | 8698   | 0.45 | C_unshiu_01710 | 27113  | 35781  | 8669   | 16.65 | 98.53 |
| scaffold00016 | 90892    | 95937    | 5046   | 0.26 | C_unshiu_01710 | 47032  | 52072  | 5041   | 9.68  | 99.66 |
| scaffold00016 | 106654   | 108970   | 2317   | 0.12 | C_unshiu_00302 | 4245   | 6561   | 2317   | 0.87  | 99.83 |
| scaffold00016 | 147363   | 164927   | 17565  | 0.91 | C_unshiu_00302 | 46526  | 64090  | 17565  | 6.61  | 98.45 |
| scaffold00016 | 174743   | 177235   | 2493   | 0.13 | C_unshiu_02588 | 13378  | 15867  | 2490   | 11.09 | 99.52 |
| scaffold00016 | 178410   | 180266   | 1857   | 0.1  | C_unshiu_02588 | 17554  | 19410  | 1857   | 8.27  | 99.41 |
| scaffold00016 | 180250   | 181849   | 1600   | 0.08 | C_unshiu_02588 | 19558  | 21159  | 1602   | 7.13  | 98.63 |
| scaffold00016 | 207626   | 210738   | 3113   | 0.16 | C_unshiu_00302 | 101008 | 104131 | 3124   | 1.18  | 99.07 |
| scaffold00016 | 210752   | 212869   | 2118   | 0.11 | C_unshiu_00302 | 104263 | 106389 | 2127   | 0.8   | 99.15 |
| scaffold00016 | 227619   | 246211   | 18593  | 0.97 | C_unshiu_00302 | 120255 | 138860 | 18606  | 7.01  | 98.78 |
| scaffold00016 | 245162   | 259761   | 14600  | 0.76 | C_unshiu_00708 | 36280  | 21790  | 14491  | 10.14 | 98.76 |
| scaffold00016 | 259812   | 278628   | 18817  | 0.98 | C_unshiu_00708 | 21878  | 3102   | 18777  | 13.14 | 99.78 |
| scaffold00016 | 259905   | 281711   | 21807  | 1.13 | C_unshiu_00708 | 21789  | 19     | 21771  | 15.24 | 99.73 |
| scaffold00016 | 307499   | 314333   | 6835   | 0.35 | C_unshiu_00302 | 159827 | 166652 | 6826   | 2.57  | 98.19 |
| scaffold00016 | 346317   | 348272   | 1956   | 0.1  | C_unshiu_00302 | 199892 | 201849 | 1958   | 0.74  | 98.93 |
| scaffold00016 | 354812   | 361212   | 6401   | 0.33 | C_unshiu_01153 | 33900  | 27493  | 6408   | 7.11  | 98.38 |
| scaffold00016 | 361294   | 362296   | 1003   | 0.05 | C_unshiu_00517 | 143894 | 142894 | 1001   | 0.54  | 99.1  |
| scaffold00016 | 372737   | 380393   | 7657   | 0.4  | C_unshiu_00302 | 216786 | 224428 | 7643   | 2.88  | 98.45 |
| scaffold00016 | 374791   | 384955   | 10165  | 0.53 | C_unshiu_02894 | 1      | 10189  | 10189  | 63.97 | 99.25 |
| scaffold00016 | 397847   | 399757   | 1911   | 0.1  | C_unshiu_00017 | 10996  | 12906  | 1911   | 0.22  | 100   |
| scaffold00016 | 399772   | 506164   | 106393 | 5.52 | C_unshiu_00017 | 13221  | 119593 | 106373 | 12.46 | 99.85 |
| scaffold00016 | 507079   | 509303   | 2225   | 0.12 | C_unshiu_00017 | 120891 | 123105 | 2215   | 0.26  | 98.39 |
| scaffold00016 | 510178   | 511848   | 1671   | 0.09 | C_unshiu_00017 | 124721 | 126391 | 1671   | 0.2   | 99.7  |
| scaffold00016 | 511849   | 518426   | 6578   | 0.34 | C_unshiu_00227 | 25341  | 18764  | 6578   | 2.12  | 100   |
| scaffold00016 | 518623   | 520734   | 2112   | 0.11 | C_unshiu_00017 | 133391 | 135502 | 2112   | 0.25  | 99.76 |
| scaffold00016 | 521350   | 524321   | 2972   | 0.15 | C_unshiu_00017 | 139095 | 142066 | 2972   | 0.35  | 99.97 |
| scaffold00016 | 524642   | 526111   | 1470   | 0.08 | C_unshiu_00017 | 143232 | 144701 | 1470   | 0.17  | 100   |
| scaffold00016 | 527184   | 534614   | 7431   | 0.39 | C_unshiu_00017 | 146281 | 153714 | 7434   | 0.87  | 99.83 |
| scaffold00016 | 530333   | 545587   | 15255  | 0.79 | C_unshiu_00334 | 34261  | 49444  | 15184  | 6.05  | 99.25 |
| scaffold00016 | 545606   | 561779   | 16174  | 0.84 | C_unshiu_00334 | 49306  | 65481  | 16176  | 6.45  | 99.92 |
| scaffold00016 | 564367   | 567942   | 3576   | 0.19 | C_unshiu_00334 | 68989  | 72564  | 3576   | 1.42  | 100   |
| scaffold00016 | 568379   | 570016   | 1638   | 0.09 | C_unshiu_00334 | 75004  | 76633  | 1630   | 0.65  | 98.48 |
| scaffold00016 | 570018   | 601667   | 31650  | 1.64 | C_unshiu_00334 | 76341  | 107969 | 31629  | 12.6  | 99.88 |
| scaffold00016 | 601925   | 607367   | 5443   | 0.28 | C_unshiu_00334 | 108885 | 114327 | 5443   | 2.17  | 99.98 |
| scaffold00016 | 615044   | 641108   | 26065  | 1.35 | C_unshiu_00334 | 122788 | 148842 | 26055  | 10.38 | 99.92 |
| scaffold00016 | 641116   | 652099   | 10984  | 0.57 | C_unshiu_00334 | 149173 | 160156 | 10984  | 4.38  | 100   |
| scaffold00016 | 653618   | 667266   | 13649  | 0.71 | C_unshiu_00334 | 160796 | 174446 | 13651  | 5.44  | 99.21 |
| scaffold00016 | 666253   | 690864   | 24612  | 1.28 | C_unshiu_00334 | 173588 | 198200 | 24613  | 9.81  | 99.97 |
| scaffold00016 | 690829   | 743390   | 52562  | 2.73 | C_unshiu_00334 | 198382 | 250971 | 52590  | 20.95 | 99.83 |
| scaffold00016 | 739036   | 787277   | 48242  | 2.51 | C_unshiu_00112 | 7796   | 55951  | 48156  | 11.04 | 99.62 |
| scaffold00016 | 788880   | 835655   | 46776  | 2.43 | C_unshiu_00112 | 58502  | 105204 | 46703  | 10.71 | 99.63 |
| scaffold00016 | 836067   | 863051   | 26985  | 1.4  | C_unshiu_00112 | 104826 | 131809 | 26984  | 6.19  | 99.98 |
| scaffold00016 | 863752   | 887684   | 23933  | 1.24 | C_unshiu_00112 | 132943 | 156885 | 23943  | 5.49  | 99.92 |
| scaffold00016 | 891662   | 902537   | 10876  | 0.56 | C_unshiu_00112 | 160058 | 170933 | 10876  | 2.49  | 99.96 |
| scaffold00016 | 904290   | 925301   | 21012  | 1.09 | C_unshiu_00112 | 171391 | 192441 | 21051  | 4.83  | 99.38 |
| scaffold00016 | 926380   | 957358   | 30979  | 1.61 | C_unshiu_00112 | 194003 | 224991 | 30989  | 7.11  | 99.94 |
| scaffold00016 | 957804   | 1019089  | 61286  | 3.18 | C_unshiu_00112 | 225050 | 286356 | 61307  | 14.06 | 99.95 |
| scaffold00016 | 999124   | 1069177  | 70054  | 3.64 | C_unshiu_00112 | 266374 | 336434 | 70061  | 16.06 | 99.87 |
| scaffold00016 | 1069214  | 1076501  | 7288   | 0.38 | C_unshiu_00112 | 336891 | 344161 | 7271   | 1.67  | 99.07 |
| scaffold00016 | 1075961  | 1161469  | 85509  | 4.44 | C_unshiu_00112 | 344157 | 429670 | 85514  | 19.61 | 99.99 |
| scaffold00016 | 1166974  | 1168591  | 1618   | 0.08 | C_unshiu_00112 | 434498 | 436114 | 1617   | 0.37  | 99.94 |
| scaffold00016 | 1177454  | 1179981  | 2528   | 0.13 | C_unshiu_00003 | 157185 | 159711 | 2527   | 0.19  | 99.72 |
| scaffold00016 | 1181500  | 1187418  | 5919   | 0.31 | C_unshiu_00003 | 161833 | 167741 | 5909   | 0.45  | 98.85 |
| scaffold00016 | 1187441  | 1189281  | 1841   | 0.1  | C_unshiu_00003 | 167871 | 169699 | 1829   | 0.14  | 98.1  |
| scaffold00016 | 1195274  | 1213640  | 18367  | 0.95 | C_unshiu_00003 | 175479 | 193877 | 18399  | 1.4   | 99.44 |
| scaffold00016 | 1214293  | 1226542  | 12250  | 0.64 | C_unshiu_00003 | 195003 | 207326 | 12324  | 0.94  | 98.59 |
| scaffold00016 | 1226531  | 1256936  | 30406  | 1.58 | C_unshiu_00003 | 208480 | 239035 | 30556  | 2.33  | 99.12 |
| scaffold00016 | 1258743  | 1289021  | 30279  | 1.57 | C_unshiu_00003 | 240275 | 270604 | 30330  | 2.32  | 99.19 |
| scaffold00016 | 1289013  | 1310408  | 21396  | 1.11 | C_unshiu_00003 | 272355 | 293785 | 21431  | 1.64  | 98.97 |

|               |         |         |        |       |                |         |         |        |       |       |
|---------------|---------|---------|--------|-------|----------------|---------|---------|--------|-------|-------|
| scaffold00016 | 1352004 | 1353594 | 1591   | 0.08  | C_unshiu_00003 | 334848  | 336439  | 1592   | 0.12  | 98.56 |
| scaffold00016 | 1353611 | 1378796 | 25186  | 1.31  | C_unshiu_00003 | 337136  | 362185  | 25050  | 1.91  | 98.07 |
| scaffold00016 | 1378792 | 1388395 | 9604   | 0.5   | C_unshiu_00003 | 363570  | 373208  | 9639   | 0.74  | 99.04 |
| scaffold00016 | 1388386 | 1428455 | 40070  | 2.08  | C_unshiu_00003 | 374196  | 414347  | 40152  | 3.07  | 99.35 |
| scaffold00016 | 1428962 | 1430940 | 1979   | 0.1   | C_unshiu_00003 | 414334  | 416311  | 1978   | 0.15  | 98.44 |
| scaffold00016 | 1430932 | 1460474 | 29543  | 1.53  | C_unshiu_00003 | 416389  | 445995  | 29607  | 2.26  | 99.47 |
| scaffold00016 | 1460474 | 1475571 | 15098  | 0.78  | C_unshiu_00003 | 445918  | 461011  | 15094  | 1.15  | 98.34 |
| scaffold00016 | 1475752 | 1483060 | 7309   | 0.38  | C_unshiu_00003 | 460992  | 468306  | 7315   | 0.56  | 98.62 |
| scaffold00016 | 1484165 | 1504120 | 19956  | 1.04  | C_unshiu_00003 | 468853  | 488824  | 19972  | 1.53  | 99.39 |
| scaffold00016 | 1515261 | 1536908 | 21648  | 1.12  | C_unshiu_00003 | 489171  | 510870  | 21700  | 1.66  | 98.99 |
| scaffold00016 | 1538136 | 1550259 | 12124  | 0.63  | C_unshiu_00003 | 511900  | 524033  | 12134  | 0.93  | 98.88 |
| scaffold00016 | 1550258 | 1564525 | 14268  | 0.74  | C_unshiu_00003 | 524255  | 538544  | 14290  | 1.09  | 99.36 |
| scaffold00016 | 1564726 | 1577816 | 13091  | 0.68  | C_unshiu_00003 | 538564  | 551694  | 13131  | 1     | 99.02 |
| scaffold00016 | 1578312 | 1590507 | 12196  | 0.63  | C_unshiu_00003 | 551731  | 563883  | 12153  | 0.93  | 99.1  |
| scaffold00016 | 1591784 | 1593861 | 2078   | 0.11  | C_unshiu_00003 | 564655  | 566737  | 2083   | 0.16  | 99.28 |
| scaffold00016 | 1594175 | 1600833 | 6659   | 0.35  | C_unshiu_00003 | 567545  | 574203  | 6659   | 0.51  | 99.83 |
| scaffold00016 | 1600815 | 1645617 | 44803  | 2.33  | C_unshiu_00003 | 574449  | 619281  | 44833  | 3.42  | 99.17 |
| scaffold00016 | 1646794 | 1649760 | 2967   | 0.15  | C_unshiu_00003 | 625747  | 628712  | 2966   | 0.23  | 99.73 |
| scaffold00016 | 1653619 | 1657510 | 3892   | 0.2   | C_unshiu_00003 | 622022  | 625913  | 3892   | 0.3   | 99.77 |
| scaffold00016 | 1659997 | 1664835 | 4839   | 0.25  | C_unshiu_00003 | 627924  | 632762  | 4839   | 0.37  | 99.59 |
| scaffold00016 | 1665266 | 1678278 | 13013  | 0.68  | C_unshiu_00003 | 633734  | 646753  | 13020  | 0.99  | 98.26 |
| scaffold00016 | 1679572 | 1686176 | 6605   | 0.34  | C_unshiu_00003 | 646751  | 653348  | 6598   | 0.5   | 98.36 |
| scaffold00016 | 1686687 | 1715163 | 28477  | 1.48  | C_unshiu_00003 | 653939  | 682525  | 28587  | 2.18  | 98.6  |
| scaffold00016 | 1728219 | 1736521 | 8303   | 0.43  | C_unshiu_00003 | 697582  | 705880  | 8299   | 0.63  | 99.47 |
| scaffold00016 | 1736487 | 1750584 | 14098  | 0.73  | C_unshiu_00003 | 705992  | 720115  | 14124  | 1.08  | 98.52 |
| scaffold00016 | 1750592 | 1753188 | 2597   | 0.13  | C_unshiu_00003 | 721557  | 724158  | 2602   | 0.2   | 99.46 |
| scaffold00016 | 1754664 | 1757275 | 2612   | 0.14  | C_unshiu_00003 | 730556  | 733171  | 2616   | 0.2   | 98.93 |
| scaffold00016 | 1755137 | 1757278 | 2142   | 0.11  | C_unshiu_03011 | 12619   | 10485   | 2135   | 16.92 | 98.51 |
| scaffold00016 | 1758019 | 1765309 | 7291   | 0.38  | C_unshiu_00003 | 725679  | 732968  | 7290   | 0.56  | 99.41 |
| scaffold00016 | 1768893 | 1776815 | 7923   | 0.41  | C_unshiu_03011 | 8460    | 538     | 7923   | 62.79 | 98.98 |
| scaffold00016 | 1771656 | 1771350 | 5695   | 0.3   | C_unshiu_00529 | 79301   | 73605   | 5697   | 3.09  | 98.7  |
| scaffold00016 | 1782261 | 1786530 | 4270   | 0.22  | C_unshiu_00003 | 740445  | 744715  | 4271   | 0.33  | 99.23 |
| scaffold00016 | 1789039 | 1806718 | 17680  | 0.92  | C_unshiu_00003 | 745786  | 763498  | 17713  | 1.35  | 99.36 |
| scaffold00016 | 1808538 | 1809984 | 1447   | 0.08  | C_unshiu_00062 | 61673   | 63122   | 1450   | 0.26  | 98.48 |
| scaffold00016 | 1811235 | 1812412 | 1178   | 0.06  | C_unshiu_00003 | 767674  | 768856  | 1183   | 0.09  | 98.73 |
| scaffold00016 | 1812419 | 1837632 | 25214  | 1.31  | C_unshiu_00003 | 769015  | 794233  | 25219  | 1.93  | 98.76 |
| scaffold00016 | 1837633 | 1843010 | 5378   | 0.28  | C_unshiu_00003 | 794188  | 799514  | 5327   | 0.41  | 98.51 |
| scaffold00016 | 1897564 | 1907730 | 10167  | 0.53  | C_unshiu_00003 | 853565  | 863734  | 10170  | 0.78  | 99.56 |
| scaffold00016 | 1912272 | 1914491 | 2220   | 0.12  | C_unshiu_00003 | 869541  | 871760  | 2220   | 0.17  | 99.95 |
| scaffold00016 | 1924503 | 1925504 | 1002   | 0.05  | C_unshiu_00211 | 251441  | 250439  | 1003   | 0.31  | 98.5  |
| scaffold00022 | 18625   | 19820   | 1196   | 0.08  | C_unshiu_00004 | 1107229 | 1108423 | 1195   | 0.1   | 99.5  |
| scaffold00022 | 21790   | 49352   | 27563  | 1.75  | C_unshiu_00004 | 1109571 | 1137128 | 27558  | 2.35  | 99.92 |
| scaffold00022 | 39375   | 64437   | 25063  | 1.59  | C_unshiu_00004 | 1127151 | 1152180 | 25030  | 2.13  | 99.83 |
| scaffold00022 | 64436   | 67723   | 3288   | 0.21  | C_unshiu_00004 | 1155488 | 1152203 | 3286   | 0.28  | 99.94 |
| scaffold00022 | 94010   | 106242  | 12233  | 0.78  | C_unshiu_01346 | 50671   | 38462   | 12210  | 16.42 | 99.43 |
| scaffold00022 | 106755  | 117365  | 10611  | 0.67  | C_unshiu_01346 | 36172   | 25556   | 10617  | 14.28 | 99.81 |
| scaffold00022 | 119170  | 143479  | 24310  | 1.54  | C_unshiu_01346 | 24346   | 41      | 24306  | 32.7  | 99.84 |
| scaffold00022 | 146710  | 226599  | 79890  | 5.06  | C_unshiu_00010 | 12453   | 92330   | 79878  | 8.13  | 99.7  |
| scaffold00022 | 206606  | 314011  | 107406 | 6.81  | C_unshiu_00010 | 72361   | 179750  | 107390 | 10.94 | 99.93 |
| scaffold00022 | 294027  | 327667  | 33641  | 2.13  | C_unshiu_00010 | 159753  | 193406  | 33654  | 3.43  | 99.96 |
| scaffold00022 | 330657  | 389126  | 58470  | 3.71  | C_unshiu_00010 | 195417  | 253880  | 58464  | 5.95  | 99.99 |
| scaffold00022 | 369122  | 620297  | 251176 | 15.92 | C_unshiu_00010 | 233882  | 485081  | 251200 | 25.58 | 99.95 |
| scaffold00022 | 620304  | 690745  | 70442  | 4.46  | C_unshiu_00010 | 486004  | 556449  | 70446  | 7.17  | 99.99 |
| scaffold00022 | 690672  | 732494  | 41823  | 2.65  | C_unshiu_00010 | 556307  | 598130  | 41824  | 4.26  | 99.99 |
| scaffold00022 | 736481  | 748237  | 11757  | 0.75  | C_unshiu_00010 | 604579  | 616335  | 11757  | 1.2   | 100   |
| scaffold00022 | 749327  | 795129  | 45803  | 2.9   | C_unshiu_00010 | 617044  | 662853  | 45810  | 4.67  | 99.73 |
| scaffold00022 | 797675  | 801418  | 3744   | 0.24  | C_unshiu_00010 | 665692  | 669422  | 3731   | 0.38  | 99.01 |
| scaffold00022 | 802222  | 839070  | 36849  | 2.34  | C_unshiu_00010 | 668799  | 705709  | 36911  | 3.76  | 99.82 |
| scaffold00022 | 845320  | 918086  | 72767  | 4.61  | C_unshiu_00010 | 711307  | 784065  | 72759  | 7.41  | 99.95 |
| scaffold00022 | 918461  | 1020326 | 101866 | 6.46  | C_unshiu_00010 | 794655  | 896514  | 101860 | 10.37 | 99.94 |
| scaffold00022 | 1023068 | 1100331 | 77264  | 4.9   | C_unshiu_00010 | 900623  | 977837  | 77215  | 7.86  | 99.92 |
| scaffold00022 | 1100332 | 1123042 | 22711  | 1.44  | C_unshiu_00551 | 141701  | 118999  | 22703  | 12.72 | 99.9  |
| scaffold00022 | 1123036 | 1144844 | 21809  | 1.38  | C_unshiu_00551 | 118164  | 96364   | 21801  | 12.21 | 99.8  |
| scaffold00022 | 1144945 | 1153506 | 8562   | 0.54  | C_unshiu_00551 | 96247   | 87681   | 8567   | 4.8   | 99.22 |
| scaffold00022 | 1150870 | 1162594 | 11725  | 0.74  | C_unshiu_00551 | 79611   | 67903   | 11709  | 6.56  | 98.74 |
| scaffold00022 | 1157980 | 1199862 | 41883  | 2.65  | C_unshiu_00551 | 67542   | 25591   | 41952  | 23.5  | 99.56 |
| scaffold00022 | 1199854 | 1307678 | 107825 | 6.83  | C_unshiu_00015 | 806560  | 698726  | 107835 | 12.27 | 99.78 |
| scaffold00022 | 1307694 | 1363184 | 55491  | 3.52  | C_unshiu_00015 | 698747  | 643265  | 55483  | 6.32  | 99.93 |
| scaffold00022 | 1364938 | 1547922 | 182985 | 11.6  | C_unshiu_00015 | 641143  | 458155  | 182989 | 20.83 | 99.98 |
| scaffold00022 | 1547923 | 1576906 | 28984  | 1.84  | C_unshiu_00015 | 458063  | 429130  | 28934  | 3.29  | 99.51 |
| scaffold00022 | 1576906 | 1577999 | 1094   | 0.07  | C_unshiu_00015 | 428047  | 429140  | 1094   | 0.12  | 98.54 |
| scaffold00024 | 1510    | 12103   | 10594  | 0.72  | C_unshiu_00408 | 188707  | 199300  | 10594  | 4.78  | 99.99 |
| scaffold00024 | 12117   | 22419   | 10303  | 0.7   | C_unshiu_00408 | 199653  | 209981  | 10329  | 4.66  | 99.17 |
| scaffold00024 | 24875   | 26633   | 1759   | 0.12  | C_unshiu_00408 | 211380  | 213138  | 1759   | 0.79  | 100   |
| scaffold00024 | 27299   | 35814   | 8516   | 0.58  | C_unshiu_00257 | 52504   | 61035   | 8532   | 2.94  | 98.79 |
| scaffold00024 | 74438   | 75948   | 1511   | 0.1   | C_unshiu_00409 | 205415  | 203905  | 1511   | 0.68  | 100   |
| scaffold00024 | 75949   | 77538   | 1590   | 0.11  | C_unshiu_00257 | 97115   | 98707   | 1593   | 0.55  | 99.69 |
| scaffold00024 | 77538   | 82290   | 4753   | 0.32  | C_unshiu_00257 | 98642   | 103408  | 4767   | 1.64  | 98.56 |
| scaffold00024 | 128195  | 131346  | 3152   | 0.21  | C_unshiu_00257 | 147646  | 150794  | 3149   | 1.08  | 98.77 |

|               |         |         |       |      |                |        |        |       |       |       |
|---------------|---------|---------|-------|------|----------------|--------|--------|-------|-------|-------|
| scaffold00024 | 135084  | 145113  | 10030 | 0.68 | C_unshiu_00257 | 153716 | 163776 | 10061 | 3.47  | 98.72 |
| scaffold00024 | 145491  | 151114  | 5624  | 0.38 | C_unshiu_00257 | 164877 | 170516 | 5640  | 1.94  | 98.58 |
| scaffold00024 | 183998  | 189559  | 5562  | 0.38 | C_unshiu_00257 | 188479 | 194090 | 5612  | 1.93  | 98.36 |
| scaffold00024 | 190848  | 192408  | 1561  | 0.11 | C_unshiu_02116 | 26095  | 27663  | 1569  | 4.36  | 99.3  |
| scaffold00024 | 194134  | 196588  | 2455  | 0.17 | C_unshiu_00257 | 194088 | 196537 | 2450  | 0.84  | 99.39 |
| scaffold00024 | 196871  | 198386  | 1516  | 0.1  | C_unshiu_00257 | 197205 | 198722 | 1518  | 0.52  | 99.01 |
| scaffold00024 | 199653  | 201816  | 2164  | 0.15 | C_unshiu_00257 | 198799 | 200961 | 2163  | 0.74  | 98.99 |
| scaffold00024 | 201826  | 217130  | 15305 | 1.04 | C_unshiu_00257 | 201429 | 216812 | 15384 | 5.3   | 98.64 |
| scaffold00024 | 219524  | 221801  | 2278  | 0.16 | C_unshiu_00257 | 219083 | 221368 | 2286  | 0.79  | 98.38 |
| scaffold00024 | 229655  | 231768  | 2114  | 0.14 | C_unshiu_01096 | 93236  | 95354  | 2119  | 2.2   | 99.72 |
| scaffold00024 | 236025  | 247384  | 11360 | 0.77 | C_unshiu_00257 | 232060 | 243439 | 11380 | 3.92  | 98.4  |
| scaffold00024 | 262255  | 264603  | 2349  | 0.16 | C_unshiu_00257 | 250253 | 252601 | 2349  | 0.81  | 100   |
| scaffold00024 | 267120  | 268281  | 1162  | 0.08 | C_unshiu_00257 | 253470 | 254631 | 1162  | 0.4   | 100   |
| scaffold00024 | 268670  | 269816  | 1147  | 0.08 | C_unshiu_00257 | 255225 | 256357 | 1133  | 0.39  | 98.61 |
| scaffold00024 | 277107  | 281493  | 4387  | 0.3  | C_unshiu_00257 | 260961 | 265354 | 4394  | 1.51  | 99.09 |
| scaffold00024 | 281494  | 283045  | 1552  | 0.11 | C_unshiu_00378 | 216885 | 215333 | 1553  | 0.67  | 99.49 |
| scaffold00024 | 283110  | 284667  | 1558  | 0.11 | C_unshiu_00378 | 215245 | 213687 | 1559  | 0.68  | 99.74 |
| scaffold00024 | 284799  | 286299  | 1501  | 0.1  | C_unshiu_00415 | 175664 | 177164 | 1501  | 0.68  | 99.07 |
| scaffold00024 | 291476  | 308372  | 16897 | 1.15 | C_unshiu_00415 | 182202 | 199093 | 16892 | 7.66  | 98.57 |
| scaffold00024 | 298353  | 312196  | 13844 | 0.94 | C_unshiu_00257 | 270887 | 284710 | 13824 | 4.76  | 98.69 |
| scaffold00024 | 312223  | 313432  | 1210  | 0.08 | C_unshiu_00257 | 286004 | 287213 | 1210  | 0.42  | 100   |
| scaffold00024 | 314232  | 326422  | 12191 | 0.83 | C_unshiu_00415 | 201500 | 213687 | 12188 | 5.53  | 98.13 |
| scaffold00024 | 334244  | 341310  | 7067  | 0.48 | C_unshiu_02226 | 8642   | 1567   | 7076  | 21.88 | 99.31 |
| scaffold00024 | 349923  | 355478  | 5556  | 0.38 | C_unshiu_00432 | 62932  | 57380  | 5553  | 2.59  | 99.78 |
| scaffold00024 | 355499  | 364664  | 9166  | 0.62 | C_unshiu_00432 | 56983  | 47818  | 9166  | 4.28  | 100   |
| scaffold00024 | 365314  | 384196  | 18883 | 1.29 | C_unshiu_00432 | 46668  | 27841  | 18828 | 8.8   | 99.24 |
| scaffold00024 | 385358  | 395818  | 10461 | 0.71 | C_unshiu_00432 | 26558  | 16087  | 10472 | 4.89  | 98.86 |
| scaffold00024 | 395841  | 397794  | 1954  | 0.13 | C_unshiu_00432 | 15928  | 13978  | 1951  | 0.91  | 98.98 |
| scaffold00024 | 398017  | 400436  | 2420  | 0.16 | C_unshiu_00432 | 13341  | 10923  | 2419  | 1.13  | 98.18 |
| scaffold00024 | 423072  | 430491  | 7420  | 0.51 | C_unshiu_02289 | 30133  | 22712  | 7422  | 24.63 | 98.66 |
| scaffold00024 | 425667  | 434889  | 9223  | 0.63 | C_unshiu_01791 | 26581  | 17315  | 9267  | 19.02 | 98.72 |
| scaffold00024 | 435005  | 440137  | 5133  | 0.35 | C_unshiu_01791 | 17184  | 12051  | 5134  | 10.53 | 98.72 |
| scaffold00024 | 440191  | 451745  | 11555 | 0.79 | C_unshiu_01791 | 11680  | 99     | 11582 | 23.77 | 98.39 |
| scaffold00024 | 452879  | 460569  | 7691  | 0.52 | C_unshiu_00882 | 102846 | 95154  | 7693  | 6.46  | 98.73 |
| scaffold00024 | 460701  | 510040  | 49340 | 3.36 | C_unshiu_00882 | 94821  | 45677  | 49145 | 41.26 | 98.32 |
| scaffold00024 | 514300  | 518082  | 3783  | 0.26 | C_unshiu_00607 | 146099 | 149880 | 3782  | 2.29  | 99.74 |
| scaffold00024 | 523045  | 550832  | 27788 | 1.89 | C_unshiu_00882 | 38762  | 10975  | 27788 | 23.33 | 100   |
| scaffold00024 | 551309  | 561159  | 9851  | 0.67 | C_unshiu_00882 | 9824   | 1      | 9824  | 8.25  | 98.77 |
| scaffold00024 | 589657  | 591386  | 1730  | 0.12 | C_unshiu_00222 | 7556   | 9261   | 1706  | 0.54  | 98.33 |
| scaffold00024 | 591422  | 594958  | 3537  | 0.24 | C_unshiu_00104 | 324583 | 321036 | 3548  | 0.79  | 99.27 |
| scaffold00024 | 595541  | 605026  | 9486  | 0.65 | C_unshiu_00104 | 319873 | 310388 | 9486  | 2.1   | 99.15 |
| scaffold00024 | 607563  | 630967  | 23405 | 1.59 | C_unshiu_00222 | 16921  | 40314  | 23394 | 7.45  | 98.91 |
| scaffold00024 | 637303  | 639126  | 1824  | 0.12 | C_unshiu_02078 | 33428  | 35265  | 1838  | 4.92  | 99.08 |
| scaffold00024 | 658102  | 659368  | 1267  | 0.09 | C_unshiu_00222 | 65103  | 66377  | 1275  | 0.41  | 99.14 |
| scaffold00024 | 676602  | 677882  | 1281  | 0.09 | C_unshiu_00233 | 305775 | 304482 | 1294  | 0.42  | 98.3  |
| scaffold00024 | 697081  | 728304  | 31224 | 2.13 | C_unshiu_00110 | 198795 | 167624 | 31172 | 7.08  | 98.47 |
| scaffold00024 | 728415  | 753813  | 25399 | 1.73 | C_unshiu_00110 | 166957 | 141590 | 25368 | 5.76  | 99.05 |
| scaffold00024 | 754651  | 775296  | 20646 | 1.41 | C_unshiu_00110 | 141997 | 121349 | 20649 | 4.69  | 99.56 |
| scaffold00024 | 778400  | 814608  | 36209 | 2.47 | C_unshiu_01370 | 69139  | 32913  | 36227 | 49.63 | 99.84 |
| scaffold00024 | 814592  | 823302  | 8711  | 0.59 | C_unshiu_01370 | 32243  | 23518  | 8726  | 11.95 | 98.93 |
| scaffold00024 | 823800  | 832677  | 8878  | 0.6  | C_unshiu_01370 | 23526  | 14678  | 8849  | 12.12 | 98.1  |
| scaffold00024 | 832695  | 834737  | 2043  | 0.14 | C_unshiu_01493 | 5872   | 7920   | 2049  | 3.22  | 99.61 |
| scaffold00024 | 838164  | 840911  | 2748  | 0.19 | C_unshiu_01493 | 9980   | 12728  | 2749  | 4.32  | 99.85 |
| scaffold00024 | 842801  | 847944  | 5144  | 0.35 | C_unshiu_01493 | 13577  | 18731  | 5155  | 8.1   | 98.02 |
| scaffold00024 | 849272  | 868324  | 19053 | 1.3  | C_unshiu_01493 | 20841  | 39918  | 19078 | 29.99 | 99.48 |
| scaffold00024 | 869796  | 870986  | 1191  | 0.08 | C_unshiu_02059 | 1      | 1191   | 1191  | 3.11  | 99.92 |
| scaffold00024 | 871165  | 879944  | 8780  | 0.6  | C_unshiu_02059 | 1333   | 10093  | 8761  | 22.85 | 99.59 |
| scaffold00024 | 880525  | 900341  | 19817 | 1.35 | C_unshiu_02059 | 11138  | 30982  | 19845 | 51.77 | 99.5  |
| scaffold00024 | 904043  | 907858  | 3816  | 0.26 | C_unshiu_02059 | 28985  | 32811  | 3827  | 9.98  | 99.09 |
| scaffold00024 | 909192  | 911090  | 1899  | 0.13 | C_unshiu_02059 | 34576  | 36474  | 1899  | 4.95  | 99.47 |
| scaffold00024 | 911625  | 912679  | 1055  | 0.07 | C_unshiu_02059 | 36804  | 37844  | 1041  | 2.72  | 98.2  |
| scaffold00024 | 915425  | 928450  | 13026 | 0.89 | C_unshiu_00499 | 152571 | 139552 | 13020 | 6.79  | 99.82 |
| scaffold00024 | 929737  | 984111  | 54375 | 3.7  | C_unshiu_00499 | 137820 | 83360  | 54461 | 28.41 | 99.51 |
| scaffold00024 | 988061  | 1015676 | 27616 | 1.88 | C_unshiu_00499 | 79917  | 52269  | 27649 | 14.42 | 99.29 |
| scaffold00024 | 1016635 | 1025828 | 9194  | 0.63 | C_unshiu_00499 | 48086  | 38887  | 9200  | 4.8   | 99.88 |
| scaffold00024 | 1027410 | 1054420 | 27011 | 1.84 | C_unshiu_00499 | 37291  | 10272  | 27020 | 14.09 | 99.07 |
| scaffold00024 | 1044439 | 1054479 | 10041 | 0.68 | C_unshiu_00499 | 20253  | 10182  | 10072 | 5.25  | 98.98 |
| scaffold00024 | 1054495 | 1061196 | 6702  | 0.46 | C_unshiu_00731 | 129438 | 122730 | 6709  | 4.84  | 99.58 |
| scaffold00024 | 1063343 | 1065099 | 1757  | 0.12 | C_unshiu_00731 | 131122 | 129361 | 1762  | 1.27  | 98.87 |
| scaffold00024 | 1069825 | 1073323 | 3499  | 0.24 | C_unshiu_00499 | 5646   | 2130   | 3517  | 1.83  | 98.66 |
| scaffold00024 | 1078866 | 1102660 | 23795 | 1.62 | C_unshiu_00731 | 99000  | 75174  | 23827 | 17.19 | 98.89 |
| scaffold00024 | 1102697 | 1121932 | 19236 | 1.31 | C_unshiu_00731 | 75467  | 56234  | 19234 | 13.88 | 98.73 |
| scaffold00024 | 1122131 | 1141992 | 19862 | 1.35 | C_unshiu_00731 | 55966  | 36143  | 19824 | 14.3  | 98.97 |
| scaffold00024 | 1141996 | 1144062 | 2067  | 0.14 | C_unshiu_00731 | 35856  | 33790  | 2067  | 1.49  | 99.56 |
| scaffold00024 | 1144255 | 1146836 | 2582  | 0.18 | C_unshiu_00731 | 33177  | 30598  | 2580  | 1.86  | 99.11 |
| scaffold00024 | 1158939 | 1170065 | 11127 | 0.76 | C_unshiu_00731 | 17883  | 6723   | 11161 | 8.05  | 99.36 |
| scaffold00024 | 1170062 | 1174825 | 4764  | 0.32 | C_unshiu_00276 | 3421   | 8204   | 4784  | 1.72  | 98.71 |
| scaffold00024 | 1195135 | 1197190 | 2056  | 0.14 | C_unshiu_00726 | 55051  | 52996  | 2056  | 1.48  | 100   |
| scaffold00024 | 1197190 | 1209051 | 11862 | 0.81 | C_unshiu_00276 | 23847  | 35714  | 11868 | 4.26  | 99.73 |

|               |         |         |        |      |                |         |         |        |       |       |
|---------------|---------|---------|--------|------|----------------|---------|---------|--------|-------|-------|
| scaffold00024 | 1201592 | 1224250 | 22659  | 1.54 | C_unshiu_00570 | 28446   | 51108   | 22663  | 13.05 | 99.89 |
| scaffold00024 | 1225419 | 1229970 | 4552   | 0.31 | C_unshiu_00570 | 52782   | 57372   | 4591   | 2.64  | 99.09 |
| scaffold00024 | 1230306 | 1235069 | 4764   | 0.32 | C_unshiu_00570 | 59379   | 64141   | 4763   | 2.74  | 99.73 |
| scaffold00024 | 1235095 | 1238432 | 3338   | 0.23 | C_unshiu_00570 | 64466   | 67800   | 3335   | 1.92  | 99.07 |
| scaffold00024 | 1238496 | 1240481 | 1986   | 0.14 | C_unshiu_00570 | 67613   | 69600   | 1988   | 1.14  | 99.65 |
| scaffold00024 | 1245871 | 1247565 | 21695  | 1.48 | C_unshiu_00570 | 70621   | 92326   | 21706  | 12.5  | 99.45 |
| scaffold00024 | 1280200 | 1284587 | 4388   | 0.3  | C_unshiu_00555 | 102988  | 98601   | 4388   | 2.48  | 100   |
| scaffold00024 | 1290410 | 1294877 | 4468   | 0.3  | C_unshiu_00555 | 93312   | 88843   | 4470   | 2.53  | 99.53 |
| scaffold00024 | 1299515 | 1347705 | 48191  | 3.28 | C_unshiu_00555 | 84136   | 36059   | 48078  | 27.17 | 99.47 |
| scaffold00024 | 1351644 | 1384617 | 32974  | 2.25 | C_unshiu_00555 | 32815   | 1       | 32815  | 18.55 | 98.97 |
| scaffold00024 | 1393121 | 1394585 | 1465   | 0.1  | C_unshiu_00570 | 102834  | 104301  | 1468   | 0.85  | 98.64 |
| scaffold00024 | 1395698 | 1400641 | 4944   | 0.34 | C_unshiu_00570 | 105843  | 110791  | 4949   | 2.85  | 98.43 |
| scaffold00024 | 1406120 | 1413985 | 7866   | 0.54 | C_unshiu_00570 | 116709  | 124606  | 7898   | 4.55  | 98.71 |
| scaffold00024 | 1418116 | 1424664 | 6549   | 0.45 | C_unshiu_00570 | 132394  | 138957  | 6564   | 3.78  | 99.47 |
| scaffold00024 | 1426825 | 1430200 | 3376   | 0.23 | C_unshiu_00570 | 139771  | 143144  | 3374   | 1.94  | 99.91 |
| scaffold00024 | 1431522 | 1435325 | 3804   | 0.26 | C_unshiu_00570 | 145382  | 149185  | 3804   | 2.19  | 99.84 |
| scaffold00024 | 1436035 | 1442392 | 6358   | 0.43 | C_unshiu_00570 | 150322  | 156675  | 6354   | 3.66  | 99.69 |
| scaffold00024 | 1444313 | 1450867 | 6555   | 0.45 | C_unshiu_00021 | 14173   | 7618    | 6556   | 0.84  | 99.95 |
| scaffold00024 | 1451477 | 1453571 | 2095   | 0.14 | C_unshiu_00021 | 6640    | 4531    | 2110   | 0.27  | 98.91 |
| scaffold00024 | 1457405 | 1459369 | 1965   | 0.13 | C_unshiu_00807 | 776     | 2743    | 1968   | 1.54  | 99.64 |
| scaffold00024 | 1459473 | 1467719 | 8247   | 0.56 | C_unshiu_00812 | 87921   | 96168   | 8248   | 6.48  | 99.03 |
| scaffold00026 | 2993    | 19720   | 16728  | 1.18 | C_unshiu_00053 | 147985  | 164721  | 16737  | 2.8   | 99.84 |
| scaffold00026 | 19715   | 24902   | 5188   | 0.37 | C_unshiu_00053 | 165082  | 170277  | 5196   | 0.87  | 99.62 |
| scaffold00026 | 25706   | 67266   | 41561  | 2.93 | C_unshiu_00053 | 171464  | 213091  | 41628  | 6.97  | 99.45 |
| scaffold00026 | 67757   | 75528   | 7772   | 0.55 | C_unshiu_00053 | 213737  | 221496  | 7760   | 1.3   | 99.15 |
| scaffold00026 | 78913   | 80043   | 1131   | 0.08 | C_unshiu_00053 | 246880  | 248012  | 1133   | 0.19  | 99.03 |
| scaffold00026 | 80044   | 82537   | 2494   | 0.18 | C_unshiu_00053 | 251364  | 253871  | 2508   | 0.42  | 99.36 |
| scaffold00026 | 85314   | 93332   | 8019   | 0.57 | C_unshiu_00053 | 227888  | 235904  | 8017   | 1.34  | 99.81 |
| scaffold00026 | 93416   | 103082  | 9667   | 0.68 | C_unshiu_00053 | 236002  | 245673  | 9672   | 1.62  | 99.71 |
| scaffold00026 | 112498  | 124078  | 11581  | 0.82 | C_unshiu_00053 | 255151  | 266720  | 11570  | 1.94  | 99.58 |
| scaffold00026 | 124073  | 139454  | 15382  | 1.09 | C_unshiu_00053 | 267683  | 283050  | 15368  | 2.57  | 99.64 |
| scaffold00026 | 139449  | 159136  | 19688  | 1.39 | C_unshiu_00053 | 283140  | 302883  | 19744  | 3.31  | 98.87 |
| scaffold00026 | 161239  | 179402  | 18164  | 1.28 | C_unshiu_00053 | 303796  | 321968  | 18173  | 3.04  | 99.46 |
| scaffold00026 | 184266  | 205387  | 21122  | 1.49 | C_unshiu_00053 | 327179  | 348313  | 21135  | 3.54  | 99.52 |
| scaffold00026 | 206139  | 265929  | 59791  | 4.22 | C_unshiu_00053 | 348333  | 408234  | 59902  | 10.03 | 99.23 |
| scaffold00026 | 265933  | 277368  | 11436  | 0.81 | C_unshiu_00053 | 409066  | 420508  | 11443  | 1.92  | 99.83 |
| scaffold00026 | 277361  | 281404  | 4044   | 0.29 | C_unshiu_00053 | 420982  | 425030  | 4049   | 0.68  | 99.04 |
| scaffold00026 | 281394  | 354911  | 73518  | 5.19 | C_unshiu_00053 | 428882  | 502466  | 73585  | 12.32 | 99.67 |
| scaffold00026 | 354913  | 386292  | 31380  | 2.22 | C_unshiu_00053 | 502882  | 534255  | 31374  | 5.25  | 99.7  |
| scaffold00026 | 391717  | 399854  | 8138   | 0.57 | C_unshiu_00053 | 540355  | 548549  | 8195   | 1.37  | 98.28 |
| scaffold00026 | 401079  | 402798  | 1720   | 0.12 | C_unshiu_00053 | 550250  | 551958  | 1709   | 0.29  | 98.95 |
| scaffold00026 | 412333  | 415203  | 2871   | 0.2  | C_unshiu_01229 | 3406    | 6289    | 2884   | 3.5   | 99.06 |
| scaffold00026 | 425516  | 456169  | 30654  | 2.16 | C_unshiu_01229 | 8347    | 39028   | 30682  | 37.21 | 99.39 |
| scaffold00026 | 458600  | 472696  | 14097  | 1    | C_unshiu_01229 | 40307   | 54405   | 14099  | 17.1  | 99.56 |
| scaffold00026 | 472937  | 500329  | 27393  | 1.93 | C_unshiu_01229 | 54638   | 82049   | 27412  | 33.24 | 99.02 |
| scaffold00026 | 489791  | 500329  | 10539  | 0.74 | C_unshiu_02662 | 13448   | 2908    | 10541  | 51.08 | 99.13 |
| scaffold00026 | 500596  | 503064  | 2469   | 0.17 | C_unshiu_02662 | 2671    | 200     | 2472   | 11.98 | 99.31 |
| scaffold00026 | 511607  | 517080  | 5474   | 0.39 | C_unshiu_00023 | 6233    | 11714   | 5482   | 0.7   | 99.44 |
| scaffold00026 | 517335  | 532622  | 15288  | 1.08 | C_unshiu_00023 | 12044   | 27318   | 15275  | 1.96  | 99.17 |
| scaffold00026 | 533814  | 538311  | 4498   | 0.32 | C_unshiu_00023 | 27717   | 32217   | 4501   | 0.58  | 99.78 |
| scaffold00026 | 539272  | 540279  | 1008   | 0.07 | C_unshiu_02077 | 24237   | 25244   | 1008   | 2.7   | 100   |
| scaffold00026 | 541093  | 559045  | 17953  | 1.27 | C_unshiu_00023 | 39143   | 57117   | 17975  | 2.31  | 99.61 |
| scaffold00026 | 562570  | 688050  | 125481 | 8.86 | C_unshiu_00023 | 60449   | 186173  | 125725 | 16.15 | 99.49 |
| scaffold00026 | 687987  | 759443  | 71457  | 5.05 | C_unshiu_00023 | 186249  | 257849  | 71601  | 9.2   | 99.49 |
| scaffold00026 | 760763  | 764502  | 3740   | 0.26 | C_unshiu_00023 | 260426  | 264169  | 3744   | 0.48  | 99.76 |
| scaffold00026 | 764645  | 804638  | 39994  | 2.82 | C_unshiu_00023 | 264761  | 304756  | 39996  | 5.14  | 99.67 |
| scaffold00026 | 807175  | 856078  | 48904  | 3.45 | C_unshiu_00023 | 304149  | 352912  | 48764  | 6.27  | 98.54 |
| scaffold00026 | 846082  | 856182  | 10101  | 0.71 | C_unshiu_00023 | 342908  | 352986  | 10079  | 1.29  | 99.32 |
| scaffold00026 | 856955  | 873324  | 16370  | 1.16 | C_unshiu_00023 | 352924  | 369272  | 16349  | 2.1   | 99.54 |
| scaffold00026 | 873316  | 899109  | 25794  | 1.82 | C_unshiu_00023 | 369904  | 395714  | 25811  | 3.32  | 99.73 |
| scaffold00026 | 909929  | 912790  | 2862   | 0.2  | C_unshiu_00023 | 402147  | 405011  | 2865   | 0.37  | 99.41 |
| scaffold00026 | 913075  | 916367  | 3293   | 0.23 | C_unshiu_00023 | 405798  | 409080  | 3283   | 0.42  | 98.49 |
| scaffold00026 | 923349  | 926462  | 3114   | 0.22 | C_unshiu_00023 | 411729  | 414845  | 3117   | 0.4   | 98.91 |
| scaffold00026 | 932143  | 937483  | 5341   | 0.38 | C_unshiu_00023 | 397032  | 402372  | 5341   | 0.69  | 99.96 |
| scaffold00026 | 939433  | 941125  | 1693   | 0.12 | C_unshiu_00023 | 404947  | 406640  | 1694   | 0.22  | 99.76 |
| scaffold00026 | 947258  | 958751  | 11494  | 0.81 | C_unshiu_00023 | 414594  | 426087  | 11494  | 1.48  | 100   |
| scaffold00026 | 959986  | 1005152 | 45167  | 3.19 | C_unshiu_00023 | 426099  | 471322  | 45224  | 5.81  | 99.62 |
| scaffold00026 | 1007373 | 1025296 | 17924  | 1.27 | C_unshiu_00023 | 472707  | 490591  | 17885  | 2.3   | 99.52 |
| scaffold00026 | 1025292 | 1033990 | 8699   | 0.61 | C_unshiu_00023 | 491360  | 500076  | 8717   | 1.12  | 99.55 |
| scaffold00026 | 1033983 | 1035304 | 1322   | 0.09 | C_unshiu_00515 | 19869   | 18548   | 1322   | 0.71  | 100   |
| scaffold00026 | 1036531 | 1039153 | 2623   | 0.19 | C_unshiu_00005 | 1057163 | 1059786 | 2624   | 0.23  | 99.01 |
| scaffold00026 | 1041804 | 1106514 | 64711  | 4.57 | C_unshiu_01272 | 64893   | 189     | 64705  | 81.47 | 99.88 |
| scaffold00026 | 1122796 | 1124431 | 1636   | 0.12 | C_unshiu_00749 | 1643    | 1       | 1643   | 1.2   | 98.85 |
| scaffold00026 | 1124094 | 1149251 | 25158  | 1.78 | C_unshiu_00749 | 1648    | 26751   | 25104  | 18.39 | 99.49 |
| scaffold00026 | 1149251 | 1150927 | 1677   | 0.12 | C_unshiu_00749 | 26684   | 28360   | 1677   | 1.23  | 100   |
| scaffold00026 | 1151520 | 1172537 | 21018  | 1.48 | C_unshiu_00749 | 28655   | 49617   | 20963  | 15.36 | 99.43 |
| scaffold00026 | 1172661 | 1216049 | 43389  | 3.06 | C_unshiu_00749 | 50490   | 93875   | 43386  | 31.79 | 99.99 |
| scaffold00026 | 1216643 | 1220895 | 4253   | 0.3  | C_unshiu_00553 | 1170    | 5424    | 4255   | 2.39  | 99.95 |
| scaffold00026 | 1222250 | 1240115 | 17866  | 1.26 | C_unshiu_00553 | 6678    | 24543   | 17866  | 10.06 | 99.99 |

|               |         |         |       |      |                |        |        |       |       |       |
|---------------|---------|---------|-------|------|----------------|--------|--------|-------|-------|-------|
| scaffold00026 | 1241256 | 1332875 | 91620 | 6.47 | C_unshiu_00553 | 26138  | 117778 | 91641 | 51.58 | 99.94 |
| scaffold00026 | 1332854 | 1386106 | 53253 | 3.76 | C_unshiu_00553 | 117840 | 171090 | 53251 | 29.97 | 99.99 |
| scaffold00026 | 1414856 | 1416045 | 1190  | 0.08 | C_unshiu_00055 | 63579  | 62389  | 1191  | 0.2   | 99.24 |
| scaffold00029 | 1599    | 78548   | 76950 | 5.62 | C_unshiu_00171 | 62888  | 139818 | 76931 | 20.96 | 99.95 |
| scaffold00029 | 78549   | 141205  | 62657 | 4.58 | C_unshiu_00171 | 139938 | 202581 | 62644 | 17.07 | 99.98 |
| scaffold00029 | 121205  | 160984  | 39780 | 2.91 | C_unshiu_00171 | 182593 | 222365 | 39773 | 10.84 | 99.95 |
| scaffold00029 | 160980  | 163417  | 2438  | 0.18 | C_unshiu_00350 | 206896 | 209333 | 2438  | 1.01  | 100   |
| scaffold00029 | 163840  | 165546  | 1707  | 0.12 | C_unshiu_00061 | 205149 | 203446 | 1704  | 0.29  | 99.12 |
| scaffold00029 | 167495  | 170962  | 3468  | 0.25 | C_unshiu_00003 | 151922 | 148448 | 3475  | 0.27  | 99.19 |
| scaffold00029 | 171099  | 174886  | 3788  | 0.28 | C_unshiu_00003 | 147849 | 144055 | 3795  | 0.29  | 99.42 |
| scaffold00029 | 176546  | 184855  | 8310  | 0.61 | C_unshiu_00003 | 141269 | 132922 | 8348  | 0.64  | 99.35 |
| scaffold00029 | 184855  | 185886  | 1032  | 0.08 | C_unshiu_00003 | 132643 | 131606 | 1038  | 0.08  | 98.65 |
| scaffold00029 | 188342  | 189543  | 1202  | 0.09 | C_unshiu_00003 | 130043 | 128842 | 1202  | 0.09  | 99.5  |
| scaffold00029 | 190983  | 206360  | 15378 | 1.12 | C_unshiu_00003 | 127033 | 111649 | 15385 | 1.17  | 99.53 |
| scaffold00029 | 211655  | 233319  | 21665 | 1.58 | C_unshiu_00003 | 110202 | 88434  | 21769 | 1.66  | 98.56 |
| scaffold00029 | 233310  | 242828  | 9519  | 0.7  | C_unshiu_00003 | 88312  | 78768  | 9545  | 0.73  | 98.04 |
| scaffold00029 | 242602  | 253097  | 10496 | 0.77 | C_unshiu_00003 | 78763  | 68254  | 10510 | 0.8   | 99.59 |
| scaffold00029 | 253096  | 276416  | 23321 | 1.7  | C_unshiu_00003 | 68300  | 44979  | 23322 | 1.78  | 98.68 |
| scaffold00029 | 276619  | 280523  | 3905  | 0.29 | C_unshiu_00003 | 44987  | 41115  | 3873  | 0.3   | 98.69 |
| scaffold00029 | 283051  | 284116  | 1066  | 0.08 | C_unshiu_00003 | 39255  | 38190  | 1066  | 0.08  | 99.81 |
| scaffold00029 | 285130  | 295728  | 10599 | 0.77 | C_unshiu_00003 | 37585  | 26946  | 10640 | 0.81  | 98.14 |
| scaffold00029 | 306674  | 318720  | 12047 | 0.88 | C_unshiu_00003 | 18392  | 6346   | 12047 | 0.92  | 99.3  |
| scaffold00029 | 323470  | 324861  | 1392  | 0.1  | C_unshiu_01726 | 315    | 1704   | 1390  | 2.69  | 99.14 |
| scaffold00029 | 326025  | 332765  | 6741  | 0.49 | C_unshiu_01726 | 664    | 7395   | 6732  | 13.04 | 98.44 |
| scaffold00029 | 335867  | 348992  | 13126 | 0.96 | C_unshiu_01726 | 11983  | 25108  | 13126 | 25.43 | 99.99 |
| scaffold00029 | 350565  | 354058  | 3494  | 0.26 | C_unshiu_01726 | 25347  | 28840  | 3494  | 6.77  | 99.91 |
| scaffold00029 | 388824  | 401906  | 13083 | 0.96 | C_unshiu_00740 | 126584 | 113484 | 13101 | 9.53  | 99.36 |
| scaffold00029 | 403698  | 404987  | 1290  | 0.09 | C_unshiu_00740 | 37268  | 38553  | 1286  | 0.94  | 99.07 |
| scaffold00029 | 405167  | 406984  | 1818  | 0.13 | C_unshiu_00740 | 111568 | 109751 | 1818  | 1.32  | 99.83 |
| scaffold00029 | 414174  | 419346  | 5173  | 0.38 | C_unshiu_00740 | 97495  | 92310  | 5186  | 3.77  | 99.27 |
| scaffold00029 | 420411  | 425909  | 5499  | 0.4  | C_unshiu_00137 | 3902   | 9398   | 5497  | 1.36  | 99.76 |
| scaffold00029 | 428551  | 431692  | 3142  | 0.23 | C_unshiu_01094 | 93386  | 96523  | 3138  | 3.25  | 98.57 |
| scaffold00029 | 432924  | 434242  | 1319  | 0.1  | C_unshiu_00740 | 83136  | 81818  | 1319  | 0.96  | 99.7  |
| scaffold00029 | 460222  | 464376  | 4155  | 0.3  | C_unshiu_00740 | 52612  | 48462  | 4151  | 3.02  | 99.86 |
| scaffold00029 | 469766  | 500928  | 31163 | 2.28 | C_unshiu_00134 | 1      | 31097  | 31097 | 7.64  | 99.73 |
| scaffold00029 | 502194  | 525612  | 23419 | 1.71 | C_unshiu_00134 | 32774  | 56104  | 23331 | 5.73  | 98.41 |
| scaffold00029 | 525613  | 528812  | 3200  | 0.23 | C_unshiu_00539 | 20394  | 17195  | 3200  | 1.77  | 100   |
| scaffold00029 | 528813  | 533494  | 4682  | 0.34 | C_unshiu_00134 | 58432  | 63130  | 4699  | 1.15  | 98.68 |
| scaffold00029 | 536944  | 541046  | 4103  | 0.3  | C_unshiu_00134 | 64466  | 68564  | 4099  | 1.01  | 99.76 |
| scaffold00029 | 542297  | 553778  | 11482 | 0.84 | C_unshiu_00134 | 68570  | 80068  | 11499 | 2.83  | 98.87 |
| scaffold00029 | 554223  | 556213  | 1991  | 0.15 | C_unshiu_00134 | 80797  | 82788  | 1992  | 0.49  | 98.35 |
| scaffold00029 | 555871  | 559701  | 3831  | 0.28 | C_unshiu_00134 | 82847  | 86680  | 3834  | 0.94  | 98.7  |
| scaffold00029 | 600197  | 609504  | 9308  | 0.68 | C_unshiu_00134 | 124729 | 134036 | 9308  | 2.29  | 99.38 |
| scaffold00029 | 619701  | 641908  | 22208 | 1.62 | C_unshiu_00134 | 149674 | 171919 | 22246 | 5.47  | 98.98 |
| scaffold00029 | 646922  | 651100  | 4179  | 0.31 | C_unshiu_00134 | 176636 | 180802 | 4167  | 1.02  | 98.71 |
| scaffold00029 | 662262  | 670080  | 7819  | 0.57 | C_unshiu_00134 | 192100 | 199949 | 7850  | 1.93  | 99.01 |
| scaffold00029 | 672545  | 683098  | 10554 | 0.77 | C_unshiu_00134 | 201547 | 211963 | 10417 | 2.56  | 98.09 |
| scaffold00029 | 683248  | 686623  | 3376  | 0.25 | C_unshiu_00134 | 211963 | 215349 | 3387  | 0.83  | 99.23 |
| scaffold00029 | 686720  | 705854  | 19135 | 1.4  | C_unshiu_00134 | 215346 | 234503 | 19158 | 4.71  | 99.02 |
| scaffold00029 | 711568  | 716325  | 4758  | 0.35 | C_unshiu_00134 | 236660 | 241431 | 4772  | 1.17  | 98.49 |
| scaffold00029 | 716709  | 748751  | 32043 | 2.34 | C_unshiu_00134 | 242170 | 274293 | 32124 | 7.9   | 98.5  |
| scaffold00029 | 754694  | 757718  | 3025  | 0.22 | C_unshiu_00134 | 279539 | 282579 | 3041  | 0.75  | 99.15 |
| scaffold00029 | 757611  | 765969  | 8359  | 0.61 | C_unshiu_00134 | 282579 | 290961 | 8383  | 2.06  | 98.33 |
| scaffold00029 | 766265  | 770484  | 4220  | 0.31 | C_unshiu_01837 | 19273  | 23492  | 4220  | 8.97  | 100   |
| scaffold00029 | 770481  | 779671  | 9191  | 0.67 | C_unshiu_00134 | 294999 | 304153 | 9155  | 2.25  | 98.33 |
| scaffold00029 | 780936  | 799041  | 18106 | 1.32 | C_unshiu_00134 | 305077 | 323206 | 18130 | 4.46  | 99.49 |
| scaffold00029 | 800946  | 802021  | 1076  | 0.08 | C_unshiu_00134 | 325277 | 326351 | 1075  | 0.26  | 99.72 |
| scaffold00029 | 813618  | 816082  | 2465  | 0.18 | C_unshiu_00134 | 334903 | 337367 | 2465  | 0.61  | 98.83 |
| scaffold00029 | 819309  | 824851  | 5543  | 0.41 | C_unshiu_00134 | 340669 | 346216 | 5548  | 1.36  | 99.42 |
| scaffold00029 | 828100  | 829214  | 1115  | 0.08 | C_unshiu_00134 | 346196 | 347307 | 1112  | 0.27  | 99.1  |
| scaffold00029 | 829214  | 839099  | 9886  | 0.72 | C_unshiu_00134 | 349994 | 359870 | 9877  | 2.43  | 99.48 |
| scaffold00029 | 841149  | 881874  | 40726 | 2.98 | C_unshiu_00134 | 361302 | 402006 | 40705 | 10    | 99.2  |
| scaffold00029 | 882631  | 886239  | 3609  | 0.26 | C_unshiu_00134 | 403278 | 406886 | 3609  | 0.89  | 100   |
| scaffold00029 | 893305  | 911414  | 18110 | 1.32 | C_unshiu_00056 | 474229 | 456082 | 18148 | 3.06  | 98.9  |
| scaffold00029 | 907934  | 912398  | 4465  | 0.33 | C_unshiu_02153 | 18905  | 23376  | 4472  | 12.79 | 99.78 |
| scaffold00029 | 917031  | 924009  | 6979  | 0.51 | C_unshiu_02153 | 27979  | 34948  | 6970  | 19.93 | 98.68 |
| scaffold00029 | 927378  | 930156  | 2779  | 0.2  | C_unshiu_00056 | 413464 | 410668 | 2797  | 0.47  | 98.25 |
| scaffold00029 | 931183  | 956737  | 25555 | 1.87 | C_unshiu_00056 | 409534 | 383879 | 25656 | 4.32  | 99.16 |
| scaffold00029 | 957605  | 966703  | 9099  | 0.66 | C_unshiu_00056 | 383999 | 374894 | 9106  | 1.53  | 99.71 |
| scaffold00029 | 979884  | 985894  | 6011  | 0.44 | C_unshiu_00056 | 361428 | 355438 | 5991  | 1.01  | 98.52 |
| scaffold00029 | 996396  | 998371  | 1976  | 0.14 | C_unshiu_00056 | 343751 | 341769 | 1983  | 0.33  | 99.14 |
| scaffold00029 | 998815  | 1011418 | 12604 | 0.92 | C_unshiu_00056 | 343019 | 330383 | 12637 | 2.13  | 98.3  |
| scaffold00029 | 1020731 | 1062845 | 42115 | 3.08 | C_unshiu_00056 | 323209 | 280995 | 42215 | 7.12  | 98.84 |
| scaffold00029 | 1062838 | 1064081 | 1244  | 0.09 | C_unshiu_00924 | 22167  | 20924  | 1244  | 1.09  | 100   |
| scaffold00029 | 1064085 | 1066456 | 2372  | 0.17 | C_unshiu_00056 | 279468 | 277097 | 2372  | 0.4   | 99.28 |
| scaffold00029 | 1067023 | 1070871 | 3849  | 0.28 | C_unshiu_00056 | 277101 | 273248 | 3854  | 0.65  | 99.17 |
| scaffold00029 | 1070874 | 1085416 | 14543 | 1.06 | C_unshiu_00056 | 273086 | 258508 | 14579 | 2.46  | 99.16 |
| scaffold00029 | 1089304 | 1143659 | 54356 | 3.97 | C_unshiu_00056 | 256371 | 202085 | 54287 | 9.15  | 98.85 |
| scaffold00029 | 1143880 | 1164952 | 21073 | 1.54 | C_unshiu_00056 | 201965 | 180862 | 21104 | 3.56  | 99.44 |

|               |         |         |        |      |                |        |        |        |       |       |
|---------------|---------|---------|--------|------|----------------|--------|--------|--------|-------|-------|
| scaffold00029 | 1165734 | 1181905 | 16172  | 1.18 | C_unshiu_00056 | 180874 | 164676 | 16199  | 2.73  | 98.78 |
| scaffold00029 | 1181916 | 1192799 | 10884  | 0.8  | C_unshiu_00056 | 164375 | 153487 | 10889  | 1.84  | 99.74 |
| scaffold00029 | 1198627 | 1211189 | 12563  | 0.92 | C_unshiu_00056 | 147268 | 134674 | 12595  | 2.12  | 99.2  |
| scaffold00029 | 1211249 | 1238618 | 27370  | 2    | C_unshiu_00056 | 134679 | 107258 | 27422  | 4.62  | 99.49 |
| scaffold00029 | 1241850 | 1249711 | 7862   | 0.57 | C_unshiu_00056 | 102965 | 95096  | 7870   | 1.33  | 98.93 |
| scaffold00029 | 1251756 | 1263988 | 12233  | 0.89 | C_unshiu_00056 | 90102  | 77872  | 12231  | 2.06  | 99.54 |
| scaffold00029 | 1265298 | 1294124 | 28827  | 2.11 | C_unshiu_00056 | 75368  | 46515  | 28854  | 4.86  | 99.01 |
| scaffold00029 | 1294148 | 1297387 | 3240   | 0.24 | C_unshiu_00056 | 46387  | 43125  | 3263   | 0.55  | 98.44 |
| scaffold00029 | 1297572 | 1299513 | 1942   | 0.14 | C_unshiu_00056 | 38669  | 36724  | 1946   | 0.33  | 99.64 |
| scaffold00029 | 1299719 | 1305068 | 5350   | 0.39 | C_unshiu_00056 | 36730  | 31350  | 5381   | 0.91  | 98.04 |
| scaffold00029 | 1305874 | 1313015 | 7142   | 0.52 | C_unshiu_00056 | 30916  | 23757  | 7160   | 1.21  | 99    |
| scaffold00029 | 1308508 | 1328111 | 19604  | 1.43 | C_unshiu_02489 | 1      | 19547  | 19547  | 78.79 | 98.77 |
| scaffold00029 | 1318474 | 1332576 | 14103  | 1.03 | C_unshiu_02489 | 9921   | 24041  | 14121  | 56.92 | 99.17 |
| scaffold00029 | 1336294 | 1339300 | 3007   | 0.22 | C_unshiu_00056 | 12350  | 9344   | 3007   | 0.51  | 99.67 |
| scaffold00029 | 1341120 | 1344459 | 3340   | 0.24 | C_unshiu_00056 | 8145   | 4806   | 3340   | 0.56  | 99.37 |
| scaffold00029 | 1343509 | 1349936 | 6428   | 0.47 | C_unshiu_00606 | 71562  | 65133  | 6430   | 3.88  | 99.35 |
| scaffold00029 | 1347061 | 1360090 | 13030  | 0.95 | C_unshiu_01131 | 56104  | 69175  | 13072  | 14.11 | 98.41 |
| scaffold00029 | 1359476 | 1364386 | 4911   | 0.36 | C_unshiu_01131 | 73241  | 78147  | 4907   | 5.3   | 99.45 |
| scaffold00029 | 1364384 | 1366188 | 1805   | 0.13 | C_unshiu_01328 | 57131  | 55301  | 1831   | 2.43  | 98.25 |
| scaffold00033 | 1730    | 10362   | 8633   | 0.71 | C_unshiu_01519 | 13116  | 4463   | 8654   | 13.89 | 99.12 |
| scaffold00033 | 12682   | 15576   | 2895   | 0.24 | C_unshiu_01519 | 3386   | 492    | 2895   | 4.65  | 100   |
| scaffold00033 | 19455   | 22801   | 3347   | 0.28 | C_unshiu_02583 | 15945  | 19303  | 3359   | 14.93 | 99.2  |
| scaffold00033 | 23716   | 25753   | 2038   | 0.17 | C_unshiu_02583 | 20457  | 22495  | 2039   | 9.06  | 99.07 |
| scaffold00033 | 30121   | 64232   | 34112  | 2.82 | C_unshiu_00062 | 2499   | 36701  | 34203  | 6.09  | 98.01 |
| scaffold00033 | 64417   | 81904   | 17488  | 1.44 | C_unshiu_00062 | 36703  | 54206  | 17504  | 3.12  | 98.28 |
| scaffold00033 | 82519   | 89915   | 7397   | 0.61 | C_unshiu_00062 | 54197  | 61603  | 7407   | 1.32  | 99.18 |
| scaffold00033 | 98711   | 100186  | 1476   | 0.12 | C_unshiu_00062 | 80269  | 81744  | 1476   | 0.26  | 99.86 |
| scaffold00033 | 107741  | 128747  | 21007  | 1.74 | C_unshiu_00062 | 81802  | 102848 | 21047  | 3.75  | 99.37 |
| scaffold00033 | 128746  | 138963  | 10218  | 0.84 | C_unshiu_00062 | 102883 | 113138 | 10256  | 1.83  | 98.95 |
| scaffold00033 | 130507  | 145007  | 14501  | 1.2  | C_unshiu_01329 | 1      | 14526  | 14526  | 19.31 | 99.09 |
| scaffold00033 | 148556  | 153542  | 4987   | 0.41 | C_unshiu_01329 | 21902  | 26888  | 4987   | 6.63  | 99.5  |
| scaffold00033 | 159319  | 168489  | 9171   | 0.76 | C_unshiu_01329 | 33318  | 42509  | 9192   | 12.22 | 99.6  |
| scaffold00033 | 174833  | 184409  | 9577   | 0.79 | C_unshiu_01329 | 48645  | 58223  | 9579   | 12.73 | 99.47 |
| scaffold00033 | 190742  | 191765  | 1024   | 0.08 | C_unshiu_00169 | 335829 | 336852 | 1024   | 0.28  | 99.02 |
| scaffold00033 | 191786  | 197630  | 5845   | 0.48 | C_unshiu_00169 | 337280 | 343164 | 5885   | 1.6   | 98.56 |
| scaffold00033 | 199545  | 214112  | 14568  | 1.2  | C_unshiu_00169 | 345573 | 360206 | 14634  | 3.98  | 98.96 |
| scaffold00033 | 217129  | 224160  | 7032   | 0.58 | C_unshiu_00169 | 360959 | 368000 | 7042   | 1.91  | 99.66 |
| scaffold00033 | 219150  | 234627  | 15478  | 1.28 | C_unshiu_02099 | 36514  | 21106  | 15409  | 42.2  | 98.94 |
| scaffold00033 | 235546  | 245816  | 10271  | 0.85 | C_unshiu_02099 | 1      | 10182  | 10182  | 27.89 | 98.74 |
| scaffold00033 | 238578  | 258768  | 20191  | 1.67 | C_unshiu_00103 | 1      | 20155  | 20155  | 4.47  | 99.55 |
| scaffold00033 | 258762  | 266632  | 7871   | 0.65 | C_unshiu_00103 | 21320  | 29240  | 7921   | 1.76  | 98.63 |
| scaffold00033 | 267051  | 286679  | 19629  | 1.62 | C_unshiu_00103 | 29336  | 48921  | 19586  | 4.34  | 98.99 |
| scaffold00033 | 286671  | 296737  | 10067  | 0.83 | C_unshiu_00103 | 49798  | 59874  | 10077  | 2.23  | 99.4  |
| scaffold00033 | 296714  | 315502  | 18789  | 1.55 | C_unshiu_00103 | 59893  | 78743  | 18851  | 4.18  | 99.23 |
| scaffold00033 | 315498  | 326444  | 10947  | 0.9  | C_unshiu_00103 | 78838  | 89855  | 11018  | 2.44  | 98.9  |
| scaffold00033 | 326585  | 328879  | 2295   | 0.19 | C_unshiu_00103 | 90690  | 92988  | 2299   | 0.51  | 99.52 |
| scaffold00033 | 332379  | 333816  | 1438   | 0.12 | C_unshiu_02229 | 2517   | 3954   | 1438   | 4.45  | 100   |
| scaffold00033 | 334793  | 337510  | 2718   | 0.22 | C_unshiu_02229 | 5205   | 7922   | 2718   | 8.41  | 99.93 |
| scaffold00033 | 342657  | 349824  | 7168   | 0.59 | C_unshiu_02229 | 12481  | 19646  | 7166   | 22.17 | 99.82 |
| scaffold00033 | 350213  | 352996  | 2784   | 0.23 | C_unshiu_02229 | 23681  | 26464  | 2784   | 8.61  | 99.6  |
| scaffold00033 | 353037  | 356124  | 3088   | 0.26 | C_unshiu_02229 | 26616  | 29687  | 3072   | 9.5   | 98.93 |
| scaffold00033 | 359263  | 362085  | 2823   | 0.23 | C_unshiu_01438 | 56126  | 53304  | 2823   | 4.17  | 99.93 |
| scaffold00033 | 365716  | 374959  | 9244   | 0.76 | C_unshiu_01438 | 49150  | 39907  | 9244   | 13.65 | 99.92 |
| scaffold00033 | 382048  | 415470  | 33423  | 2.76 | C_unshiu_00210 | 168650 | 202041 | 33392  | 10.19 | 99.91 |
| scaffold00033 | 395484  | 445303  | 49820  | 4.12 | C_unshiu_00210 | 182086 | 231924 | 49839  | 15.22 | 99.77 |
| scaffold00033 | 445056  | 525259  | 80204  | 6.63 | C_unshiu_01202 | 85425  | 5215   | 80211  | 93.9  | 99.94 |
| scaffold00033 | 525645  | 526731  | 1087   | 0.09 | C_unshiu_01202 | 4546   | 3460   | 1087   | 1.27  | 100   |
| scaffold00033 | 527299  | 530493  | 3195   | 0.26 | C_unshiu_00794 | 70403  | 73600  | 3198   | 2.48  | 99.69 |
| scaffold00033 | 530514  | 534948  | 4435   | 0.37 | C_unshiu_00794 | 73491  | 77925  | 4435   | 3.44  | 99.82 |
| scaffold00033 | 535696  | 553770  | 18075  | 1.49 | C_unshiu_00607 | 40446  | 58521  | 18076  | 10.93 | 99.94 |
| scaffold00033 | 554041  | 565811  | 11771  | 0.97 | C_unshiu_00607 | 58580  | 70350  | 11771  | 7.12  | 100   |
| scaffold00033 | 566705  | 569178  | 2474   | 0.2  | C_unshiu_00607 | 71590  | 74065  | 2476   | 1.5   | 99.76 |
| scaffold00033 | 570254  | 573050  | 2797   | 0.23 | C_unshiu_00225 | 290800 | 288004 | 2797   | 0.89  | 100   |
| scaffold00033 | 573042  | 574452  | 1411   | 0.12 | C_unshiu_00607 | 76944  | 78353  | 1410   | 0.85  | 99.93 |
| scaffold00033 | 574477  | 601870  | 27394  | 2.26 | C_unshiu_00607 | 79405  | 106798 | 27394  | 16.57 | 99.96 |
| scaffold00033 | 601893  | 603099  | 1207   | 0.1  | C_unshiu_00607 | 106680 | 107886 | 1207   | 0.73  | 99.83 |
| scaffold00033 | 602928  | 605817  | 2890   | 0.24 | C_unshiu_00607 | 108293 | 111177 | 2885   | 1.74  | 99.17 |
| scaffold00033 | 611752  | 623340  | 11589  | 0.96 | C_unshiu_00607 | 116886 | 128400 | 11515  | 6.96  | 98.84 |
| scaffold00033 | 623375  | 625196  | 1822   | 0.15 | C_unshiu_00607 | 128301 | 130122 | 1822   | 1.1   | 100   |
| scaffold00033 | 625201  | 626215  | 1015   | 0.08 | C_unshiu_00124 | 204536 | 205548 | 1013   | 0.24  | 98.82 |
| scaffold00033 | 628302  | 630995  | 2694   | 0.22 | C_unshiu_00124 | 201637 | 198944 | 2694   | 0.64  | 99.85 |
| scaffold00033 | 631376  | 669259  | 37884  | 3.13 | C_unshiu_00124 | 197906 | 160074 | 37833  | 9.03  | 99.22 |
| scaffold00033 | 664213  | 765504  | 101292 | 8.37 | C_unshiu_00094 | 300282 | 199057 | 101226 | 21.78 | 99.76 |
| scaffold00033 | 761717  | 765518  | 3802   | 0.31 | C_unshiu_00094 | 195142 | 198943 | 3802   | 0.82  | 100   |
| scaffold00033 | 770320  | 785982  | 15663  | 1.29 | C_unshiu_00094 | 194090 | 178427 | 15664  | 3.37  | 99.87 |
| scaffold00033 | 786675  | 854014  | 67340  | 5.56 | C_unshiu_00094 | 177294 | 109920 | 67375  | 14.5  | 99.92 |
| scaffold00033 | 854094  | 870557  | 16464  | 1.36 | C_unshiu_00094 | 109580 | 93107  | 16474  | 3.54  | 99.89 |
| scaffold00033 | 871692  | 952821  | 81130  | 6.7  | C_unshiu_00094 | 91291  | 10182  | 81110  | 17.45 | 99.92 |
| scaffold00033 | 953524  | 988047  | 34524  | 2.85 | C_unshiu_00679 | 1      | 34533  | 34533  | 23.25 | 99.94 |

|               |         |         |       |      |                |        |        |       |       |       |
|---------------|---------|---------|-------|------|----------------|--------|--------|-------|-------|-------|
| scaffold00033 | 988915  | 1018672 | 29758 | 2.46 | C_unshiu_00679 | 35989  | 65773  | 29785 | 20.05 | 99.85 |
| scaffold00033 | 1020511 | 1102379 | 81869 | 6.76 | C_unshiu_00679 | 66802  | 148552 | 81751 | 55.03 | 99.65 |
| scaffold00033 | 1099339 | 1132736 | 33398 | 2.76 | C_unshiu_02192 | 1      | 33437  | 33437 | 100   | 99.66 |
| scaffold00033 | 1127310 | 1146618 | 19309 | 1.6  | C_unshiu_01139 | 1      | 19314  | 19314 | 20.97 | 99.97 |
| scaffold00033 | 1149668 | 1188291 | 38624 | 3.19 | C_unshiu_01139 | 27133  | 65726  | 38594 | 41.91 | 99.75 |
| scaffold00033 | 1192974 | 1210395 | 17422 | 1.44 | C_unshiu_01139 | 71323  | 88755  | 17433 | 18.93 | 99.76 |
| scaffold00038 | 11801   | 13774   | 1974  | 0.18 | C_unshiu_00318 | 252557 | 254530 | 1974  | 0.77  | 100   |
| scaffold00038 | 14771   | 20288   | 5518  | 0.5  | C_unshiu_01823 | 30189  | 35683  | 5495  | 11.55 | 98.53 |
| scaffold00038 | 21075   | 22785   | 1711  | 0.15 | C_unshiu_01823 | 35681  | 37391  | 1711  | 3.6   | 99.36 |
| scaffold00038 | 26459   | 27970   | 1512  | 0.14 | C_unshiu_01823 | 38564  | 40075  | 1512  | 3.18  | 99.34 |
| scaffold00038 | 67046   | 98885   | 31840 | 2.86 | C_unshiu_00849 | 89197  | 57331  | 31867 | 25.96 | 98.06 |
| scaffold00038 | 119446  | 122804  | 3359  | 0.3  | C_unshiu_01094 | 89402  | 92760  | 3359  | 3.48  | 98.12 |
| scaffold00038 | 125700  | 132388  | 6689  | 0.6  | C_unshiu_00849 | 42979  | 36222  | 6758  | 5.5   | 98.34 |
| scaffold00038 | 137223  | 138982  | 1760  | 0.16 | C_unshiu_00849 | 24991  | 23222  | 1770  | 1.44  | 98.64 |
| scaffold00038 | 142171  | 146487  | 4317  | 0.39 | C_unshiu_00849 | 18844  | 14515  | 4330  | 3.53  | 99.08 |
| scaffold00038 | 147944  | 153425  | 5482  | 0.49 | C_unshiu_00849 | 13048  | 7561   | 5488  | 4.47  | 99.31 |
| scaffold00038 | 155364  | 156928  | 1565  | 0.14 | C_unshiu_00849 | 6198   | 4634   | 1565  | 1.27  | 99.23 |
| scaffold00038 | 160427  | 162871  | 2445  | 0.22 | C_unshiu_00849 | 2443   | 1      | 2443  | 1.99  | 99.02 |
| scaffold00038 | 165092  | 168355  | 3264  | 0.29 | C_unshiu_00120 | 307833 | 304601 | 3233  | 0.77  | 98.38 |
| scaffold00038 | 187356  | 191775  | 4420  | 0.4  | C_unshiu_00120 | 295063 | 290657 | 4407  | 1.04  | 98.82 |
| scaffold00038 | 191793  | 194979  | 3187  | 0.29 | C_unshiu_01646 | 12068  | 8874   | 3195  | 5.77  | 98.75 |
| scaffold00038 | 205042  | 213874  | 8833  | 0.79 | C_unshiu_00120 | 281759 | 272906 | 8854  | 2.1   | 98.99 |
| scaffold00038 | 216899  | 218927  | 2029  | 0.18 | C_unshiu_02848 | 15262  | 13234  | 2029  | 12.15 | 99.56 |
| scaffold00038 | 220825  | 226235  | 5411  | 0.49 | C_unshiu_02848 | 12184  | 6811   | 5374  | 32.19 | 98.03 |
| scaffold00038 | 257529  | 263508  | 5980  | 0.54 | C_unshiu_00120 | 229990 | 224009 | 5982  | 1.42  | 98.61 |
| scaffold00038 | 278202  | 305845  | 27644 | 2.48 | C_unshiu_00120 | 208677 | 181035 | 27643 | 6.55  | 99.29 |
| scaffold00038 | 285842  | 328964  | 43123 | 3.87 | C_unshiu_00120 | 201021 | 157933 | 43089 | 10.21 | 99.19 |
| scaffold00038 | 333683  | 335973  | 2291  | 0.21 | C_unshiu_00120 | 152045 | 149729 | 2317  | 0.55  | 98.45 |
| scaffold00038 | 398479  | 399895  | 1417  | 0.13 | C_unshiu_00933 | 113293 | 111875 | 1419  | 1.25  | 99.44 |
| scaffold00038 | 419879  | 427611  | 7733  | 0.69 | C_unshiu_00933 | 92209  | 84466  | 7744  | 6.84  | 98.48 |
| scaffold00038 | 431292  | 433220  | 1929  | 0.17 | C_unshiu_02209 | 32893  | 30952  | 1942  | 5.9   | 98.46 |
| scaffold00038 | 435990  | 441611  | 5622  | 0.51 | C_unshiu_00933 | 78413  | 72778  | 5636  | 4.97  | 99.33 |
| scaffold00038 | 452100  | 453680  | 1581  | 0.14 | C_unshiu_02209 | 18983  | 17396  | 1588  | 4.83  | 98.43 |
| scaffold00038 | 494098  | 504619  | 10522 | 0.95 | C_unshiu_02608 | 1      | 10503  | 10503 | 47.96 | 98.82 |
| scaffold00038 | 498605  | 510777  | 12173 | 1.09 | C_unshiu_00933 | 16832  | 4643   | 12190 | 10.76 | 99.35 |
| scaffold00038 | 512861  | 515605  | 2745  | 0.25 | C_unshiu_02608 | 19157  | 21899  | 2743  | 12.53 | 99.38 |
| scaffold00038 | 512863  | 516425  | 3563  | 0.32 | C_unshiu_00933 | 3585   | 1      | 3585  | 3.16  | 98.91 |
| scaffold00038 | 525769  | 528431  | 2663  | 0.24 | C_unshiu_00163 | 37352  | 40016  | 2665  | 0.72  | 99.44 |
| scaffold00038 | 558582  | 574013  | 15432 | 1.39 | C_unshiu_00163 | 70631  | 86096  | 15466 | 4.18  | 98.7  |
| scaffold00038 | 574011  | 589551  | 15541 | 1.4  | C_unshiu_00163 | 86296  | 101859 | 15564 | 4.21  | 99.19 |
| scaffold00038 | 633296  | 639604  | 6309  | 0.57 | C_unshiu_00163 | 143342 | 149668 | 6327  | 1.71  | 98.26 |
| scaffold00038 | 639623  | 650303  | 10681 | 0.96 | C_unshiu_00163 | 150544 | 161281 | 10738 | 2.9   | 98.35 |
| scaffold00038 | 665790  | 692307  | 26518 | 2.38 | C_unshiu_00163 | 177311 | 203922 | 26612 | 7.19  | 98.54 |
| scaffold00038 | 692301  | 699989  | 7689  | 0.69 | C_unshiu_00163 | 203960 | 211724 | 7765  | 2.1   | 98.24 |
| scaffold00038 | 700023  | 710540  | 10518 | 0.94 | C_unshiu_00163 | 212503 | 223108 | 10606 | 2.87  | 98.16 |
| scaffold00038 | 710557  | 718014  | 7458  | 0.67 | C_unshiu_00163 | 223505 | 230973 | 7469  | 2.02  | 98.84 |
| scaffold00038 | 718012  | 720054  | 2043  | 0.18 | C_unshiu_00163 | 231816 | 233854 | 2039  | 0.55  | 98.53 |
| scaffold00038 | 722688  | 727587  | 4900  | 0.44 | C_unshiu_00163 | 234337 | 239234 | 4898  | 1.32  | 98.7  |
| scaffold00038 | 731753  | 733585  | 1833  | 0.16 | C_unshiu_00163 | 243053 | 244884 | 1832  | 0.5   | 99.51 |
| scaffold00038 | 752983  | 766870  | 13888 | 1.25 | C_unshiu_00163 | 263660 | 277686 | 14027 | 3.79  | 98.23 |
| scaffold00038 | 766870  | 773545  | 6676  | 0.6  | C_unshiu_00163 | 277812 | 284508 | 6697  | 1.81  | 99.13 |
| scaffold00038 | 773538  | 789443  | 15906 | 1.43 | C_unshiu_00163 | 284838 | 300777 | 15940 | 4.31  | 99.04 |
| scaffold00038 | 789533  | 799129  | 9597  | 0.86 | C_unshiu_00163 | 301056 | 310667 | 9612  | 2.6   | 99.15 |
| scaffold00038 | 830436  | 841104  | 10669 | 0.96 | C_unshiu_00163 | 345986 | 356640 | 10655 | 2.88  | 98.65 |
| scaffold00038 | 841657  | 842773  | 1117  | 0.1  | C_unshiu_00163 | 357201 | 358324 | 1124  | 0.3   | 98.31 |
| scaffold00038 | 848723  | 856012  | 7290  | 0.65 | C_unshiu_00060 | 96083  | 88796  | 7288  | 1.26  | 98.33 |
| scaffold00038 | 859649  | 907686  | 48038 | 4.32 | C_unshiu_00060 | 61160  | 13089  | 48072 | 8.3   | 99.24 |
| scaffold00038 | 908151  | 912954  | 4804  | 0.43 | C_unshiu_00060 | 13094  | 8310   | 4785  | 0.83  | 99.13 |
| scaffold00038 | 917487  | 923713  | 6227  | 0.56 | C_unshiu_00599 | 4550   | 10775  | 6226  | 3.71  | 99.74 |
| scaffold00038 | 923730  | 932048  | 8319  | 0.75 | C_unshiu_00599 | 11243  | 19556  | 8314  | 4.95  | 99.35 |
| scaffold00038 | 932854  | 938275  | 5422  | 0.49 | C_unshiu_00599 | 20632  | 26060  | 5429  | 3.23  | 99.5  |
| scaffold00038 | 938270  | 964284  | 26015 | 2.34 | C_unshiu_00599 | 26732  | 52757  | 26026 | 15.49 | 98.56 |
| scaffold00038 | 975694  | 987112  | 11419 | 1.03 | C_unshiu_00599 | 55111  | 66497  | 11387 | 6.78  | 98.88 |
| scaffold00038 | 987229  | 991622  | 4394  | 0.39 | C_unshiu_00599 | 66499  | 70894  | 4396  | 2.62  | 99.5  |
| scaffold00038 | 995389  | 1015862 | 20474 | 1.84 | C_unshiu_00599 | 74561  | 95029  | 20469 | 12.19 | 99.32 |
| scaffold00038 | 1015886 | 1023895 | 8010  | 0.72 | C_unshiu_00599 | 95314  | 103341 | 8028  | 4.78  | 99.46 |
| scaffold00038 | 1040598 | 1049557 | 8960  | 0.8  | C_unshiu_00599 | 123000 | 131963 | 8964  | 5.34  | 99.21 |
| scaffold00038 | 1054383 | 1072860 | 18478 | 1.66 | C_unshiu_00599 | 136189 | 154726 | 18538 | 11.04 | 99.15 |
| scaffold00038 | 1072966 | 1080112 | 7147  | 0.64 | C_unshiu_00599 | 155106 | 162281 | 7176  | 4.27  | 99.05 |
| scaffold00038 | 1092302 | 1109140 | 16839 | 1.51 | C_unshiu_00095 | 445578 | 428763 | 16816 | 3.62  | 99.32 |
| scaffold00038 | 1109151 | 1113010 | 3860  | 0.35 | C_unshiu_00095 | 428788 | 424935 | 3854  | 0.83  | 99.53 |
| scaffold00041 | 10369   | 17636   | 7268  | 0.67 | C_unshiu_02143 | 1      | 7257   | 7257  | 20.57 | 99.79 |
| scaffold00041 | 12274   | 18817   | 6544  | 0.61 | C_unshiu_00044 | 637996 | 631453 | 6544  | 1.03  | 100   |
| scaffold00041 | 19947   | 31584   | 11638 | 1.08 | C_unshiu_00044 | 630158 | 618521 | 11638 | 1.82  | 100   |
| scaffold00041 | 31937   | 70177   | 38241 | 3.54 | C_unshiu_00044 | 617857 | 579624 | 38234 | 5.99  | 99.95 |
| scaffold00041 | 71798   | 121864  | 50067 | 4.64 | C_unshiu_00044 | 578919 | 528839 | 50081 | 7.85  | 99.95 |
| scaffold00041 | 101877  | 198053  | 96177 | 8.91 | C_unshiu_00044 | 548840 | 452580 | 96261 | 15.09 | 99.83 |
| scaffold00041 | 197667  | 202430  | 4764  | 0.44 | C_unshiu_00044 | 447934 | 443171 | 4764  | 0.75  | 100   |
| scaffold00041 | 202445  | 208117  | 5673  | 0.53 | C_unshiu_00044 | 443191 | 437519 | 5673  | 0.89  | 100   |

|               |         |         |        |       |                |        |        |        |       |       |
|---------------|---------|---------|--------|-------|----------------|--------|--------|--------|-------|-------|
| scaffold00041 | 208151  | 285066  | 76916  | 7.13  | C_unshiu_00044 | 437617 | 360728 | 76890  | 12.05 | 99.96 |
| scaffold00041 | 286055  | 305434  | 19380  | 1.8   | C_unshiu_00044 | 358795 | 339444 | 19352  | 3.03  | 99.86 |
| scaffold00041 | 305425  | 349465  | 44041  | 4.08  | C_unshiu_00044 | 339416 | 295372 | 44045  | 6.9   | 99.96 |
| scaffold00041 | 352403  | 355504  | 3102   | 0.29  | C_unshiu_00044 | 292282 | 289180 | 3103   | 0.49  | 98.49 |
| scaffold00041 | 356166  | 358252  | 2087   | 0.19  | C_unshiu_00460 | 93893  | 91807  | 2087   | 1.02  | 99.23 |
| scaffold00041 | 358908  | 392676  | 33769  | 3.13  | C_unshiu_00044 | 284387 | 250618 | 33770  | 5.29  | 99.73 |
| scaffold00041 | 393542  | 414453  | 20912  | 1.94  | C_unshiu_00044 | 248839 | 227994 | 20846  | 3.27  | 99.55 |
| scaffold00041 | 413352  | 414569  | 1218   | 0.11  | C_unshiu_00460 | 98361  | 97145  | 1217   | 0.59  | 99.34 |
| scaffold00041 | 414949  | 444992  | 30044  | 2.78  | C_unshiu_00044 | 217729 | 187862 | 29868  | 4.68  | 99.31 |
| scaffold00041 | 454578  | 456196  | 1619   | 0.15  | C_unshiu_01024 | 70972  | 69355  | 1618   | 1.56  | 99.94 |
| scaffold00041 | 456188  | 465733  | 9546   | 0.88  | C_unshiu_01024 | 76825  | 86370  | 9546   | 9.23  | 100   |
| scaffold00041 | 465726  | 467129  | 1404   | 0.13  | C_unshiu_01926 | 10487  | 11890  | 1404   | 3.2   | 100   |
| scaffold00041 | 467130  | 469375  | 2246   | 0.21  | C_unshiu_01024 | 88345  | 90590  | 2246   | 2.17  | 100   |
| scaffold00041 | 469376  | 470866  | 1491   | 0.14  | C_unshiu_01024 | 94319  | 92816  | 1504   | 1.45  | 98.14 |
| scaffold00041 | 473646  | 477341  | 3696   | 0.34  | C_unshiu_01024 | 94312  | 98007  | 3696   | 3.57  | 100   |
| scaffold00041 | 480749  | 487874  | 7126   | 0.66  | C_unshiu_00032 | 541152 | 534056 | 7097   | 1.01  | 98.64 |
| scaffold00041 | 488476  | 496540  | 8065   | 0.75  | C_unshiu_00032 | 530060 | 521984 | 8077   | 1.15  | 99.46 |
| scaffold00041 | 499689  | 521509  | 21821  | 2.02  | C_unshiu_00032 | 518681 | 496889 | 21793  | 3.1   | 98.19 |
| scaffold00041 | 528411  | 538412  | 10002  | 0.93  | C_unshiu_00032 | 492276 | 482308 | 9969   | 1.42  | 98.29 |
| scaffold00041 | 538531  | 564646  | 26116  | 2.42  | C_unshiu_00032 | 482306 | 456103 | 26204  | 3.73  | 99.1  |
| scaffold00041 | 564757  | 575377  | 10621  | 0.98  | C_unshiu_00032 | 455780 | 445097 | 10684  | 1.52  | 98.84 |
| scaffold00041 | 576684  | 589593  | 12910  | 1.2   | C_unshiu_00032 | 444394 | 431467 | 12928  | 1.84  | 99.55 |
| scaffold00041 | 596376  | 602430  | 6055   | 0.56  | C_unshiu_00032 | 430073 | 424023 | 6051   | 0.86  | 99.09 |
| scaffold00041 | 602431  | 654442  | 52012  | 4.82  | C_unshiu_00032 | 424061 | 371996 | 52066  | 7.41  | 99.42 |
| scaffold00041 | 654452  | 656037  | 1586   | 0.15  | C_unshiu_00032 | 370836 | 369251 | 1586   | 0.23  | 99.87 |
| scaffold00041 | 656437  | 681573  | 25137  | 2.33  | C_unshiu_00032 | 369271 | 344138 | 25134  | 3.58  | 98.9  |
| scaffold00041 | 682359  | 683788  | 1430   | 0.13  | C_unshiu_00032 | 327129 | 325700 | 1430   | 0.2   | 99.51 |
| scaffold00041 | 683786  | 695616  | 11831  | 1.1   | C_unshiu_00032 | 323850 | 312033 | 11818  | 1.68  | 99.06 |
| scaffold00041 | 700230  | 704936  | 4707   | 0.44  | C_unshiu_00032 | 307891 | 303174 | 4718   | 0.67  | 99.47 |
| scaffold00041 | 706575  | 717775  | 11201  | 1.04  | C_unshiu_00032 | 302063 | 290853 | 11211  | 1.6   | 99.74 |
| scaffold00041 | 718048  | 720448  | 2401   | 0.22  | C_unshiu_00032 | 291033 | 288622 | 2412   | 0.34  | 99.38 |
| scaffold00041 | 728697  | 788559  | 59863  | 5.55  | C_unshiu_00032 | 279781 | 219883 | 59899  | 8.52  | 99.11 |
| scaffold00041 | 789574  | 809080  | 19507  | 1.81  | C_unshiu_00032 | 218072 | 198505 | 19568  | 2.78  | 98.26 |
| scaffold00041 | 809272  | 823436  | 14165  | 1.31  | C_unshiu_00032 | 199549 | 185312 | 14238  | 2.03  | 98.69 |
| scaffold00041 | 823969  | 825992  | 2024   | 0.19  | C_unshiu_01743 | 40602  | 38579  | 2024   | 3.99  | 99.01 |
| scaffold00041 | 835059  | 838338  | 3280   | 0.3   | C_unshiu_01743 | 29170  | 25883  | 3288   | 6.47  | 98.85 |
| scaffold00041 | 838650  | 844698  | 6049   | 0.56  | C_unshiu_01743 | 25594  | 19544  | 6051   | 11.92 | 99.82 |
| scaffold00041 | 844703  | 858144  | 13442  | 1.25  | C_unshiu_01743 | 19646  | 6199   | 13448  | 26.48 | 99.29 |
| scaffold00041 | 853702  | 896648  | 42947  | 3.98  | C_unshiu_00063 | 508660 | 551566 | 42907  | 7.66  | 98.41 |
| scaffold00041 | 896989  | 901777  | 4789   | 0.44  | C_unshiu_00063 | 551926 | 556715 | 4790   | 0.85  | 99.25 |
| scaffold00041 | 901843  | 902857  | 1015   | 0.09  | C_unshiu_00063 | 556818 | 557832 | 1015   | 0.18  | 99.7  |
| scaffold00041 | 903759  | 944236  | 40478  | 3.75  | C_unshiu_00747 | 70266  | 29727  | 40540  | 29.67 | 99.27 |
| scaffold00041 | 944315  | 947832  | 3518   | 0.33  | C_unshiu_00747 | 30786  | 27271  | 3516   | 2.57  | 99.43 |
| scaffold00041 | 949408  | 950845  | 1438   | 0.13  | C_unshiu_00747 | 25426  | 23988  | 1439   | 1.05  | 98.4  |
| scaffold00041 | 950963  | 963125  | 12163  | 1.13  | C_unshiu_00747 | 23851  | 11680  | 12172  | 8.91  | 98.59 |
| scaffold00041 | 969771  | 971494  | 1724   | 0.16  | C_unshiu_00287 | 204377 | 206101 | 1725   | 0.63  | 99.83 |
| scaffold00041 | 971509  | 1033091 | 61583  | 5.71  | C_unshiu_00287 | 207135 | 268790 | 61656  | 22.58 | 99.41 |
| scaffold00041 | 1037678 | 1050049 | 12372  | 1.15  | C_unshiu_01718 | 51855  | 39484  | 12372  | 23.86 | 99.98 |
| scaffold00041 | 1053061 | 1063950 | 10890  | 1.01  | C_unshiu_01718 | 36932  | 26043  | 10890  | 21    | 100   |
| scaffold00041 | 1068184 | 1070483 | 2300   | 0.21  | C_unshiu_01718 | 22296  | 20001  | 2296   | 4.43  | 98.09 |
| scaffold00057 | 1297    | 2723    | 1427   | 0.16  | C_unshiu_01349 | 54638  | 53212  | 1427   | 1.92  | 99.86 |
| scaffold00057 | 7783    | 10792   | 3010   | 0.34  | C_unshiu_01349 | 48725  | 45715  | 3011   | 4.06  | 99.04 |
| scaffold00057 | 10817   | 12372   | 1556   | 0.18  | C_unshiu_01349 | 45430  | 43875  | 1556   | 2.1   | 99.61 |
| scaffold00057 | 13258   | 14722   | 1465   | 0.17  | C_unshiu_01349 | 42987  | 41522  | 1466   | 1.98  | 99.32 |
| scaffold00057 | 15732   | 23628   | 7897   | 0.89  | C_unshiu_01349 | 40072  | 32178  | 7895   | 10.65 | 99.08 |
| scaffold00057 | 24718   | 32345   | 7628   | 0.86  | C_unshiu_00076 | 487389 | 479762 | 7628   | 1.5   | 100   |
| scaffold00057 | 32015   | 41725   | 9711   | 1.1   | C_unshiu_00076 | 475179 | 465469 | 9711   | 1.91  | 99.99 |
| scaffold00057 | 41710   | 106384  | 64675  | 7.32  | C_unshiu_00076 | 465434 | 400736 | 64699  | 12.72 | 99.94 |
| scaffold00057 | 106537  | 119538  | 13002  | 1.47  | C_unshiu_00076 | 400580 | 387601 | 12980  | 2.55  | 99.3  |
| scaffold00057 | 119994  | 170238  | 50245  | 5.69  | C_unshiu_00076 | 386710 | 336460 | 50251  | 9.88  | 99.91 |
| scaffold00057 | 170618  | 243476  | 72859  | 8.25  | C_unshiu_00076 | 335903 | 263046 | 72858  | 14.32 | 99.99 |
| scaffold00057 | 244123  | 324464  | 80342  | 9.1   | C_unshiu_00076 | 262012 | 181672 | 80341  | 15.8  | 99.98 |
| scaffold00057 | 325451  | 361687  | 36237  | 4.1   | C_unshiu_00076 | 181655 | 145451 | 36205  | 7.12  | 99.86 |
| scaffold00057 | 361701  | 367402  | 5702   | 0.65  | C_unshiu_00076 | 145161 | 139454 | 5708   | 1.12  | 99.86 |
| scaffold00057 | 373735  | 376881  | 3147   | 0.36  | C_unshiu_00076 | 112721 | 109561 | 3161   | 0.62  | 99.49 |
| scaffold00057 | 377933  | 392502  | 14570  | 1.65  | C_unshiu_00076 | 133759 | 119176 | 14584  | 2.87  | 99.68 |
| scaffold00057 | 392984  | 398489  | 5506   | 0.62  | C_unshiu_00076 | 118540 | 113033 | 5508   | 1.08  | 99.96 |
| scaffold00057 | 401285  | 447437  | 46153  | 5.22  | C_unshiu_00076 | 109782 | 63520  | 46263  | 9.1   | 99.66 |
| scaffold00057 | 447042  | 473007  | 25966  | 2.94  | C_unshiu_00029 | 5940   | 31895  | 25956  | 3.62  | 99.86 |
| scaffold00057 | 473080  | 575669  | 102590 | 11.61 | C_unshiu_00029 | 31990  | 134617 | 102628 | 14.31 | 99.93 |
| scaffold00057 | 575254  | 635922  | 60669  | 6.87  | C_unshiu_00029 | 135036 | 195705 | 60670  | 8.46  | 99.97 |
| scaffold00057 | 636101  | 638053  | 1953   | 0.22  | C_unshiu_00029 | 195820 | 197772 | 1953   | 0.27  | 100   |
| scaffold00057 | 638497  | 653150  | 14654  | 1.66  | C_unshiu_00029 | 198697 | 213351 | 14655  | 2.04  | 99.99 |
| scaffold00057 | 653466  | 669202  | 15737  | 1.78  | C_unshiu_00029 | 214160 | 229878 | 15719  | 2.19  | 99.86 |
| scaffold00057 | 671520  | 769408  | 97889  | 11.08 | C_unshiu_00029 | 231353 | 329238 | 97886  | 13.65 | 99.82 |
| scaffold00057 | 769387  | 823675  | 54289  | 6.15  | C_unshiu_00029 | 329297 | 383576 | 54280  | 7.57  | 99.94 |
| scaffold00057 | 823695  | 825886  | 2192   | 0.25  | C_unshiu_00029 | 383235 | 385427 | 2193   | 0.31  | 98.54 |
| scaffold00057 | 827301  | 829877  | 2577   | 0.29  | C_unshiu_00490 | 132410 | 134986 | 2577   | 1.31  | 99.92 |
| scaffold00057 | 830055  | 854877  | 24823  | 2.81  | C_unshiu_00029 | 388751 | 413562 | 24812  | 3.46  | 99.88 |

|               |        |        |       |      |                |        |        |       |       |       |
|---------------|--------|--------|-------|------|----------------|--------|--------|-------|-------|-------|
| scaffold00057 | 861681 | 863222 | 1542  | 0.17 | C_unshiu_01250 | 79886  | 78345  | 1542  | 1.91  | 98.51 |
| scaffold00057 | 863962 | 867478 | 3517  | 0.4  | C_unshiu_00097 | 68546  | 72019  | 3474  | 0.75  | 98.32 |
| scaffold00057 | 867681 | 870414 | 2734  | 0.31 | C_unshiu_00097 | 72176  | 74887  | 2712  | 0.59  | 98.5  |
| scaffold00057 | 875052 | 877191 | 2140  | 0.24 | C_unshiu_01039 | 75425  | 77565  | 2141  | 2.1   | 99.86 |
| scaffold00057 | 881172 | 883312 | 2141  | 0.24 | C_unshiu_01039 | 81788  | 83928  | 2141  | 2.1   | 99.63 |
| scaffold00058 | 959    | 7595   | 6637  | 0.75 | C_unshiu_00263 | 260869 | 267500 | 6632  | 2.33  | 99.8  |
| scaffold00058 | 15752  | 20157  | 4406  | 0.5  | C_unshiu_00050 | 107111 | 102707 | 4405  | 0.73  | 99.57 |
| scaffold00058 | 22347  | 25536  | 3190  | 0.36 | C_unshiu_00050 | 101543 | 98354  | 3190  | 0.53  | 100   |
| scaffold00058 | 29966  | 32307  | 2342  | 0.27 | C_unshiu_00795 | 79087  | 81428  | 2342  | 1.82  | 100   |
| scaffold00058 | 32304  | 43534  | 11231 | 1.28 | C_unshiu_00050 | 91964  | 80734  | 11231 | 1.86  | 100   |
| scaffold00058 | 44190  | 49625  | 5436  | 0.62 | C_unshiu_00050 | 79688  | 74221  | 5468  | 0.91  | 99.4  |
| scaffold00058 | 77858  | 82739  | 4882  | 0.56 | C_unshiu_01443 | 21477  | 16587  | 4891  | 7.27  | 99.39 |
| scaffold00058 | 85173  | 91145  | 5973  | 0.68 | C_unshiu_01443 | 13370  | 7404   | 5967  | 8.87  | 98.48 |
| scaffold00058 | 91280  | 94231  | 2952  | 0.34 | C_unshiu_01443 | 6883   | 3931   | 2953  | 4.39  | 99.97 |
| scaffold00058 | 101018 | 122679 | 21662 | 2.46 | C_unshiu_00714 | 7599   | 29261  | 21663 | 15.26 | 98.45 |
| scaffold00058 | 122171 | 129323 | 7153  | 0.81 | C_unshiu_00714 | 29419  | 36555  | 7137  | 5.03  | 98.1  |
| scaffold00058 | 129346 | 130621 | 1276  | 0.15 | C_unshiu_00714 | 37308  | 38583  | 1276  | 0.9   | 100   |
| scaffold00058 | 137988 | 141961 | 3974  | 0.45 | C_unshiu_00714 | 57680  | 61718  | 4039  | 2.85  | 98.09 |
| scaffold00058 | 144349 | 157313 | 12965 | 1.47 | C_unshiu_00714 | 63320  | 76269  | 12950 | 9.12  | 99.02 |
| scaffold00058 | 157317 | 186735 | 29419 | 3.35 | C_unshiu_00714 | 77700  | 107164 | 29465 | 20.76 | 99.57 |
| scaffold00058 | 187655 | 200856 | 13202 | 1.5  | C_unshiu_00714 | 108554 | 121757 | 13204 | 9.3   | 99.87 |
| scaffold00058 | 203100 | 220920 | 17821 | 2.03 | C_unshiu_00714 | 124132 | 141953 | 17822 | 12.55 | 99.8  |
| scaffold00058 | 219161 | 228045 | 8885  | 1.01 | C_unshiu_02280 | 30365  | 21479  | 8887  | 29.27 | 99.88 |
| scaffold00058 | 233977 | 245353 | 11377 | 1.29 | C_unshiu_02280 | 15449  | 4069   | 11381 | 37.48 | 98.7  |
| scaffold00058 | 247977 | 249624 | 1648  | 0.19 | C_unshiu_02280 | 2759   | 1113   | 1647  | 5.42  | 99.64 |
| scaffold00058 | 251365 | 252841 | 1477  | 0.17 | C_unshiu_00600 | 145406 | 143929 | 1478  | 0.88  | 98.38 |
| scaffold00058 | 251365 | 252841 | 1477  | 0.17 | C_unshiu_00612 | 109913 | 108437 | 1477  | 0.9   | 99.26 |
| scaffold00058 | 255655 | 306871 | 51217 | 5.82 | C_unshiu_00011 | 341663 | 392862 | 51200 | 5.29  | 99.82 |
| scaffold00058 | 308632 | 317283 | 8652  | 0.98 | C_unshiu_00011 | 395654 | 404310 | 8657  | 0.9   | 99.8  |
| scaffold00058 | 318180 | 330534 | 12355 | 1.41 | C_unshiu_00011 | 412623 | 424985 | 12363 | 1.28  | 99.84 |
| scaffold00058 | 331147 | 348132 | 16986 | 1.93 | C_unshiu_00011 | 424638 | 441647 | 17010 | 1.76  | 98.71 |
| scaffold00058 | 349345 | 365940 | 16596 | 1.89 | C_unshiu_00011 | 442883 | 459475 | 16593 | 1.72  | 99.82 |
| scaffold00058 | 366080 | 401888 | 35809 | 4.07 | C_unshiu_00011 | 459566 | 495398 | 35833 | 3.71  | 98.53 |
| scaffold00058 | 401962 | 408037 | 6076  | 0.69 | C_unshiu_00011 | 495391 | 501468 | 6078  | 0.63  | 99.77 |
| scaffold00058 | 412958 | 422319 | 9362  | 1.06 | C_unshiu_00011 | 506700 | 516073 | 9374  | 0.97  | 99.5  |
| scaffold00058 | 422415 | 443096 | 20682 | 2.35 | C_unshiu_00011 | 516184 | 536856 | 20673 | 2.14  | 99.46 |
| scaffold00058 | 445202 | 462178 | 16977 | 1.93 | C_unshiu_00011 | 540995 | 557999 | 17005 | 1.76  | 99.66 |
| scaffold00058 | 463825 | 474391 | 10567 | 1.2  | C_unshiu_00011 | 561564 | 572118 | 10555 | 1.09  | 99.48 |
| scaffold00058 | 474392 | 475460 | 1069  | 0.12 | C_unshiu_00171 | 307738 | 306670 | 1069  | 0.29  | 100   |
| scaffold00058 | 475457 | 477613 | 2157  | 0.25 | C_unshiu_00011 | 573197 | 575360 | 2164  | 0.22  | 98.29 |
| scaffold00058 | 477477 | 503989 | 26513 | 3.02 | C_unshiu_00011 | 574982 | 601523 | 26542 | 2.74  | 99.56 |
| scaffold00058 | 503987 | 509447 | 5461  | 0.62 | C_unshiu_00011 | 601456 | 606904 | 5449  | 0.56  | 99.67 |
| scaffold00058 | 515432 | 519991 | 4560  | 0.52 | C_unshiu_00011 | 614075 | 618636 | 4562  | 0.47  | 99.89 |
| scaffold00058 | 521625 | 522778 | 1154  | 0.13 | C_unshiu_00011 | 620754 | 621907 | 1154  | 0.12  | 99.22 |
| scaffold00058 | 522797 | 525070 | 2274  | 0.26 | C_unshiu_00011 | 622195 | 624468 | 2274  | 0.24  | 99.82 |
| scaffold00058 | 525449 | 539985 | 14537 | 1.65 | C_unshiu_00011 | 625202 | 639806 | 14605 | 1.51  | 99.17 |
| scaffold00058 | 540180 | 545941 | 5762  | 0.66 | C_unshiu_00011 | 640261 | 646022 | 5762  | 0.6   | 99.74 |
| scaffold00058 | 552571 | 553929 | 1359  | 0.15 | C_unshiu_00011 | 652608 | 653968 | 1361  | 0.14  | 99.71 |
| scaffold00058 | 555658 | 557003 | 1346  | 0.15 | C_unshiu_00011 | 656024 | 657368 | 1345  | 0.14  | 99.26 |
| scaffold00058 | 567250 | 599036 | 31787 | 3.61 | C_unshiu_00343 | 12248  | 44014  | 31767 | 12.81 | 98.94 |
| scaffold00058 | 599056 | 603020 | 3965  | 0.45 | C_unshiu_00343 | 45338  | 49303  | 3966  | 1.6   | 99.82 |
| scaffold00058 | 603041 | 629485 | 26445 | 3.01 | C_unshiu_00343 | 50018  | 76440  | 26423 | 10.65 | 99.71 |
| scaffold00058 | 629360 | 649186 | 19827 | 2.25 | C_unshiu_00343 | 76427  | 96246  | 19820 | 7.99  | 99.66 |
| scaffold00058 | 652602 | 668350 | 15749 | 1.79 | C_unshiu_00686 | 146804 | 131026 | 15779 | 10.75 | 99.54 |
| scaffold00058 | 681599 | 702450 | 20852 | 2.37 | C_unshiu_00686 | 127515 | 106603 | 20913 | 14.25 | 99.38 |
| scaffold00058 | 702629 | 716766 | 14138 | 1.61 | C_unshiu_00686 | 105968 | 91798  | 14171 | 9.65  | 99.29 |
| scaffold00058 | 721094 | 748865 | 27772 | 3.16 | C_unshiu_00686 | 87538  | 59751  | 27788 | 18.93 | 99.79 |
| scaffold00058 | 750362 | 795570 | 45209 | 5.14 | C_unshiu_00686 | 57983  | 12836  | 45148 | 30.75 | 99.37 |
| scaffold00058 | 795591 | 805771 | 10181 | 1.16 | C_unshiu_00686 | 12604  | 2437   | 10168 | 6.93  | 98.38 |
| scaffold00058 | 807259 | 808261 | 1003  | 0.11 | C_unshiu_00960 | 62591  | 61590  | 1002  | 0.91  | 98.7  |
| scaffold00058 | 812178 | 822678 | 10501 | 1.19 | C_unshiu_02274 | 7008   | 17492  | 10485 | 34.22 | 99.69 |
| scaffold00058 | 822784 | 828352 | 5569  | 0.63 | C_unshiu_02274 | 17599  | 23174  | 5576  | 18.2  | 99.23 |
| scaffold00058 | 829652 | 833774 | 4123  | 0.47 | C_unshiu_00019 | 791429 | 795551 | 4123  | 0.49  | 100   |
| scaffold00058 | 834646 | 836148 | 1503  | 0.17 | C_unshiu_02274 | 28678  | 30179  | 1502  | 4.9   | 99.2  |
| scaffold00058 | 856761 | 859272 | 2512  | 0.29 | C_unshiu_01989 | 40928  | 38394  | 2535  | 6.19  | 98.86 |
| scaffold00058 | 863565 | 870210 | 6646  | 0.76 | C_unshiu_01989 | 35311  | 28665  | 6647  | 16.24 | 99.64 |
| scaffold00058 | 871012 | 874640 | 3629  | 0.41 | C_unshiu_01989 | 27747  | 24118  | 3630  | 8.87  | 99.64 |
| scaffold00058 | 876030 | 878059 | 2030  | 0.23 | C_unshiu_01989 | 38198  | 36170  | 2029  | 4.96  | 99.9  |
| scaffold00067 | 6940   | 9595   | 2656  | 0.33 | C_unshiu_00318 | 245514 | 242857 | 2658  | 1.04  | 99.55 |
| scaffold00067 | 9615   | 11522  | 1908  | 0.23 | C_unshiu_01823 | 18483  | 16576  | 1908  | 4.01  | 99.79 |
| scaffold00067 | 20292  | 28623  | 8332  | 1.03 | C_unshiu_01823 | 8338   | 1      | 8338  | 17.53 | 98.7  |
| scaffold00067 | 30559  | 56824  | 26266 | 3.23 | C_unshiu_00318 | 221061 | 194679 | 26383 | 10.28 | 98.51 |
| scaffold00067 | 77855  | 98170  | 20316 | 2.5  | C_unshiu_00318 | 173718 | 153326 | 20393 | 7.95  | 98.21 |
| scaffold00067 | 108262 | 110676 | 2415  | 0.3  | C_unshiu_00318 | 144705 | 142287 | 2419  | 0.94  | 99.38 |
| scaffold00067 | 110682 | 115268 | 4587  | 0.56 | C_unshiu_00318 | 142164 | 137590 | 4575  | 1.78  | 98.98 |
| scaffold00067 | 115347 | 122955 | 7609  | 0.94 | C_unshiu_00318 | 137327 | 129722 | 7606  | 2.96  | 98.49 |
| scaffold00067 | 123488 | 126338 | 2851  | 0.35 | C_unshiu_00318 | 129411 | 126583 | 2829  | 1.1   | 98.21 |
| scaffold00067 | 126427 | 132100 | 5674  | 0.7  | C_unshiu_00318 | 126583 | 120867 | 5717  | 2.23  | 98.81 |
| scaffold00067 | 133062 | 134939 | 1878  | 0.23 | C_unshiu_00318 | 120274 | 118394 | 1881  | 0.73  | 99.84 |

|               |        |        |       |      |                |        |        |       |       |       |
|---------------|--------|--------|-------|------|----------------|--------|--------|-------|-------|-------|
| scaffold00067 | 141145 | 151564 | 10420 | 1.28 | C_unshiu_00318 | 112665 | 102241 | 10425 | 4.06  | 99.02 |
| scaffold00067 | 155723 | 165726 | 10004 | 1.23 | C_unshiu_00318 | 97066  | 87047  | 10020 | 3.9   | 98.9  |
| scaffold00067 | 165727 | 167526 | 1800  | 0.22 | C_unshiu_00514 | 23704  | 21905  | 1800  | 0.96  | 100   |
| scaffold00067 | 167767 | 194958 | 27192 | 3.35 | C_unshiu_00318 | 86073  | 58853  | 27221 | 10.61 | 98.63 |
| scaffold00067 | 196267 | 198839 | 2573  | 0.32 | C_unshiu_00318 | 58837  | 56239  | 2599  | 1.01  | 98.31 |
| scaffold00067 | 200888 | 205185 | 4298  | 0.53 | C_unshiu_00318 | 56083  | 51769  | 4315  | 1.68  | 98.96 |
| scaffold00067 | 221454 | 224409 | 2956  | 0.36 | C_unshiu_00318 | 36826  | 33866  | 2961  | 1.15  | 98.82 |
| scaffold00067 | 244758 | 262197 | 17440 | 2.15 | C_unshiu_01973 | 1      | 17494  | 17494 | 42.05 | 98.98 |
| scaffold00067 | 263311 | 270490 | 7180  | 0.88 | C_unshiu_01817 | 912    | 8091   | 7180  | 15    | 100   |
| scaffold00067 | 284074 | 289472 | 5399  | 0.66 | C_unshiu_01973 | 36183  | 41598  | 5416  | 13.02 | 98.51 |
| scaffold00067 | 289653 | 299578 | 9926  | 1.22 | C_unshiu_01817 | 20431  | 30377  | 9947  | 20.78 | 98.88 |
| scaffold00067 | 315904 | 316912 | 1009  | 0.12 | C_unshiu_01817 | 39927  | 40935  | 1009  | 2.11  | 100   |
| scaffold00067 | 317813 | 322404 | 4592  | 0.57 | C_unshiu_01817 | 41305  | 45947  | 4643  | 9.7   | 98.09 |
| scaffold00067 | 322400 | 328048 | 5649  | 0.7  | C_unshiu_00575 | 21082  | 26730  | 5649  | 3.28  | 100   |
| scaffold00067 | 328274 | 334836 | 6563  | 0.81 | C_unshiu_00186 | 332284 | 325677 | 6608  | 1.91  | 98.01 |
| scaffold00067 | 355994 | 384978 | 28985 | 3.57 | C_unshiu_00186 | 303880 | 274802 | 29079 | 8.4   | 98.43 |
| scaffold00067 | 400858 | 406257 | 5400  | 0.66 | C_unshiu_00186 | 260290 | 254871 | 5420  | 1.57  | 98.21 |
| scaffold00067 | 406257 | 407694 | 1438  | 0.18 | C_unshiu_01991 | 30939  | 29502  | 1438  | 3.52  | 100   |
| scaffold00067 | 407694 | 416593 | 8900  | 1.1  | C_unshiu_00186 | 254465 | 245587 | 8879  | 2.56  | 98.81 |
| scaffold00067 | 416590 | 422874 | 6285  | 0.77 | C_unshiu_00186 | 245500 | 239203 | 6298  | 1.82  | 98.68 |
| scaffold00067 | 425526 | 455143 | 29618 | 3.65 | C_unshiu_00186 | 239208 | 209484 | 29725 | 8.58  | 98.04 |
| scaffold00067 | 457892 | 459892 | 2001  | 0.25 | C_unshiu_00186 | 206751 | 204751 | 2001  | 0.58  | 99.5  |
| scaffold00067 | 477156 | 480000 | 2845  | 0.35 | C_unshiu_00186 | 189345 | 186497 | 2849  | 0.82  | 98.88 |
| scaffold00067 | 481457 | 485291 | 3835  | 0.47 | C_unshiu_00186 | 186139 | 182274 | 3866  | 1.12  | 98.89 |
| scaffold00067 | 499377 | 515316 | 15940 | 1.96 | C_unshiu_00186 | 169855 | 153875 | 15981 | 4.62  | 98.71 |
| scaffold00067 | 515520 | 530651 | 15132 | 1.86 | C_unshiu_00186 | 153891 | 138654 | 15238 | 4.4   | 98.38 |
| scaffold00067 | 547884 | 563800 | 15917 | 1.96 | C_unshiu_00186 | 122029 | 106103 | 15927 | 4.6   | 98.88 |
| scaffold00067 | 596973 | 605938 | 8966  | 1.1  | C_unshiu_00186 | 72056  | 63053  | 9004  | 2.6   | 98.5  |
| scaffold00067 | 632397 | 633694 | 1298  | 0.16 | C_unshiu_00186 | 39096  | 37801  | 1296  | 0.37  | 99.46 |
| scaffold00067 | 633695 | 636689 | 2995  | 0.37 | C_unshiu_01104 | 24338  | 21344  | 2995  | 3.13  | 100   |
| scaffold00067 | 641068 | 642783 | 1716  | 0.21 | C_unshiu_00186 | 32128  | 30415  | 1714  | 0.5   | 98.32 |
| scaffold00067 | 645019 | 650586 | 5568  | 0.69 | C_unshiu_00186 | 21722  | 16156  | 5567  | 1.61  | 99.37 |
| scaffold00067 | 661250 | 662919 | 1670  | 0.21 | C_unshiu_00128 | 11418  | 13087  | 1670  | 0.4   | 100   |
| scaffold00067 | 665148 | 674214 | 9067  | 1.12 | C_unshiu_00128 | 13673  | 22738  | 9066  | 2.19  | 99.99 |
| scaffold00067 | 675072 | 694072 | 19001 | 2.34 | C_unshiu_00128 | 23959  | 42972  | 19014 | 4.6   | 99.65 |
| scaffold00067 | 693684 | 708254 | 14571 | 1.79 | C_unshiu_00128 | 44409  | 59078  | 14670 | 3.55  | 98.88 |
| scaffold00067 | 708253 | 716572 | 8320  | 1.02 | C_unshiu_00128 | 59251  | 67589  | 8339  | 2.02  | 99.29 |
| scaffold00067 | 716864 | 730152 | 13289 | 1.64 | C_unshiu_00128 | 67585  | 80898  | 13314 | 3.22  | 99.07 |
| scaffold00067 | 730152 | 753773 | 23622 | 2.91 | C_unshiu_00128 | 80998  | 104692 | 23695 | 5.73  | 98.87 |
| scaffold00067 | 753881 | 755225 | 1345  | 0.17 | C_unshiu_00128 | 105539 | 106882 | 1344  | 0.33  | 99.18 |
| scaffold00067 | 756044 | 757924 | 1881  | 0.23 | C_unshiu_00200 | 272052 | 273932 | 1881  | 0.56  | 100   |
| scaffold00067 | 757925 | 758944 | 1020  | 0.13 | C_unshiu_00128 | 107884 | 108903 | 1020  | 0.25  | 99.51 |
| scaffold00067 | 759415 | 761754 | 2340  | 0.29 | C_unshiu_00211 | 25036  | 27372  | 2337  | 0.71  | 99.02 |
| scaffold00067 | 763255 | 766469 | 3215  | 0.4  | C_unshiu_03111 | 5745   | 8960   | 3216  | 35.89 | 98.94 |
| scaffold00067 | 776105 | 780785 | 4681  | 0.58 | C_unshiu_00902 | 39113  | 34433  | 4681  | 4.02  | 100   |
| scaffold00067 | 783408 | 806707 | 23300 | 2.87 | C_unshiu_00902 | 31976  | 8834   | 23143 | 19.85 | 98.83 |
| scaffold00067 | 807455 | 809366 | 1912  | 0.24 | C_unshiu_00902 | 7841   | 5922   | 1920  | 1.65  | 98.8  |
| scaffold00067 | 809822 | 812252 | 2431  | 0.3  | C_unshiu_00902 | 4771   | 2341   | 2431  | 2.09  | 100   |
| scaffold00072 | 1314   | 6307   | 4994  | 0.64 | C_unshiu_00141 | 58299  | 63300  | 5002  | 1.25  | 99.08 |
| scaffold00072 | 6328   | 67734  | 61407 | 7.91 | C_unshiu_00141 | 63788  | 125193 | 61406 | 15.3  | 99.99 |
| scaffold00072 | 68987  | 71906  | 2920  | 0.38 | C_unshiu_00575 | 24000  | 21081  | 2920  | 1.69  | 100   |
| scaffold00072 | 72529  | 93575  | 21047 | 2.71 | C_unshiu_00141 | 129262 | 150340 | 21079 | 5.25  | 99.55 |
| scaffold00072 | 97894  | 106109 | 8216  | 1.06 | C_unshiu_00141 | 154074 | 162292 | 8219  | 2.05  | 99.96 |
| scaffold00072 | 106269 | 109595 | 3327  | 0.43 | C_unshiu_00141 | 162680 | 166006 | 3327  | 0.83  | 99.97 |
| scaffold00072 | 110727 | 146507 | 35781 | 4.61 | C_unshiu_00141 | 166791 | 202563 | 35773 | 8.91  | 99.49 |
| scaffold00072 | 149717 | 164841 | 15125 | 1.95 | C_unshiu_00141 | 205273 | 220434 | 15162 | 3.78  | 99.76 |
| scaffold00072 | 165195 | 196582 | 31388 | 4.04 | C_unshiu_00141 | 220797 | 251865 | 31069 | 7.74  | 98.52 |
| scaffold00072 | 198220 | 202629 | 4410  | 0.57 | C_unshiu_00141 | 253902 | 258313 | 4412  | 1.1   | 99.46 |
| scaffold00072 | 202030 | 217288 | 15259 | 1.96 | C_unshiu_00141 | 258194 | 273481 | 15288 | 3.81  | 99.33 |
| scaffold00072 | 218160 | 256361 | 38202 | 4.92 | C_unshiu_00141 | 274803 | 313003 | 38201 | 9.52  | 99.99 |
| scaffold00072 | 256383 | 320547 | 64165 | 8.26 | C_unshiu_00141 | 313287 | 377414 | 64128 | 15.98 | 99.93 |
| scaffold00072 | 326259 | 327351 | 1093  | 0.14 | C_unshiu_00146 | 182194 | 183289 | 1096  | 0.28  | 98.36 |
| scaffold00072 | 330749 | 343364 | 12616 | 1.62 | C_unshiu_00141 | 388242 | 400854 | 12613 | 3.14  | 99.98 |
| scaffold00072 | 367475 | 384532 | 17058 | 2.2  | C_unshiu_01310 | 1      | 17058  | 17058 | 22.38 | 100   |
| scaffold00072 | 392809 | 413558 | 20750 | 2.67 | C_unshiu_00864 | 96577  | 117341 | 20765 | 17.18 | 99.9  |
| scaffold00072 | 393536 | 415172 | 21637 | 2.79 | C_unshiu_00864 | 97304  | 118954 | 21651 | 17.91 | 99.57 |
| scaffold00072 | 423872 | 425530 | 1659  | 0.21 | C_unshiu_00259 | 1      | 1659   | 1659  | 0.58  | 99.94 |
| scaffold00072 | 425537 | 490452 | 64916 | 8.36 | C_unshiu_00259 | 2951   | 67849  | 64899 | 22.6  | 99.94 |
| scaffold00072 | 490488 | 495511 | 5024  | 0.65 | C_unshiu_00259 | 67745  | 72766  | 5022  | 1.75  | 98.91 |
| scaffold00072 | 499044 | 501372 | 2329  | 0.3  | C_unshiu_00974 | 86408  | 84101  | 2308  | 2.12  | 98.67 |
| scaffold00072 | 509031 | 515568 | 6538  | 0.84 | C_unshiu_00974 | 75652  | 69122  | 6531  | 5.99  | 99.82 |
| scaffold00072 | 515565 | 517416 | 1852  | 0.24 | C_unshiu_00974 | 69085  | 67234  | 1852  | 1.7   | 100   |
| scaffold00072 | 518410 | 526533 | 8124  | 1.05 | C_unshiu_00974 | 65713  | 57586  | 8128  | 7.46  | 99.14 |
| scaffold00072 | 528050 | 529717 | 1668  | 0.21 | C_unshiu_01550 | 37266  | 38931  | 1666  | 2.75  | 99.88 |
| scaffold00072 | 530490 | 532259 | 1770  | 0.23 | C_unshiu_01550 | 40047  | 41814  | 1768  | 2.92  | 99.55 |
| scaffold00072 | 532279 | 533417 | 1139  | 0.15 | C_unshiu_00974 | 104390 | 105529 | 1140  | 1.05  | 99.3  |
| scaffold00072 | 544311 | 549380 | 5070  | 0.65 | C_unshiu_00051 | 155633 | 150564 | 5070  | 0.85  | 99.9  |
| scaffold00072 | 550529 | 551780 | 1252  | 0.16 | C_unshiu_01043 | 45208  | 46459  | 1252  | 1.24  | 99.92 |
| scaffold00072 | 555924 | 562304 | 6381  | 0.82 | C_unshiu_00051 | 147001 | 140619 | 6383  | 1.06  | 98.24 |

|               |        |        |        |       |                |        |        |        |       |       |
|---------------|--------|--------|--------|-------|----------------|--------|--------|--------|-------|-------|
| scaffold00072 | 559839 | 562308 | 2470   | 0.32  | C_unshiu_01550 | 57343  | 54883  | 2461   | 4.07  | 99.03 |
| scaffold00072 | 563374 | 569180 | 5807   | 0.75  | C_unshiu_01550 | 53833  | 48027  | 5807   | 9.6   | 100   |
| scaffold00072 | 570872 | 573580 | 2709   | 0.35  | C_unshiu_00496 | 184670 | 181982 | 2689   | 1.4   | 99.08 |
| scaffold00072 | 575925 | 592785 | 16861  | 2.17  | C_unshiu_00496 | 181982 | 165016 | 16967  | 8.82  | 98.43 |
| scaffold00072 | 601173 | 602575 | 1403   | 0.18  | C_unshiu_00496 | 156394 | 154988 | 1407   | 0.73  | 98.37 |
| scaffold00072 | 606943 | 608844 | 1902   | 0.24  | C_unshiu_00496 | 152665 | 150764 | 1902   | 0.99  | 99.47 |
| scaffold00072 | 615169 | 616381 | 1213   | 0.16  | C_unshiu_00496 | 144113 | 142901 | 1213   | 0.63  | 99.01 |
| scaffold00072 | 632097 | 634160 | 2064   | 0.27  | C_unshiu_00496 | 135262 | 133197 | 2066   | 1.07  | 98.6  |
| scaffold00072 | 641379 | 653786 | 12408  | 1.6   | C_unshiu_00496 | 125425 | 113018 | 12408  | 6.45  | 100   |
| scaffold00072 | 672370 | 682698 | 10329  | 1.33  | C_unshiu_00496 | 91846  | 81434  | 10413  | 5.41  | 98.45 |
| scaffold00072 | 682890 | 701693 | 18804  | 2.42  | C_unshiu_00496 | 81415  | 62502  | 18914  | 9.83  | 98.39 |
| scaffold00072 | 701691 | 705828 | 4138   | 0.53  | C_unshiu_00496 | 61666  | 57500  | 4167   | 2.17  | 98.37 |
| scaffold00072 | 730380 | 733830 | 3451   | 0.44  | C_unshiu_00496 | 31954  | 28497  | 3458   | 1.8   | 99.25 |
| scaffold00072 | 751478 | 753170 | 1693   | 0.22  | C_unshiu_00821 | 86398  | 84706  | 1693   | 1.34  | 100   |
| scaffold00072 | 753163 | 755131 | 1969   | 0.25  | C_unshiu_00165 | 248436 | 246470 | 1967   | 0.53  | 99.85 |
| scaffold00072 | 756907 | 758267 | 1361   | 0.18  | C_unshiu_00242 | 94117  | 95474  | 1358   | 0.45  | 98.09 |
| scaffold00072 | 760050 | 761056 | 1007   | 0.13  | C_unshiu_00165 | 223137 | 222131 | 1007   | 0.27  | 100   |
| scaffold00076 | 2730   | 3835   | 1106   | 0.15  | C_unshiu_01550 | 42116  | 43221  | 1106   | 1.83  | 100   |
| scaffold00076 | 4661   | 9246   | 4586   | 0.61  | C_unshiu_00372 | 46106  | 50680  | 4575   | 1.97  | 99.69 |
| scaffold00076 | 9278   | 13860  | 4583   | 0.61  | C_unshiu_00372 | 51023  | 55609  | 4587   | 1.98  | 99.26 |
| scaffold00076 | 46440  | 51268  | 4829   | 0.64  | C_unshiu_00384 | 48685  | 43857  | 4829   | 2.13  | 100   |
| scaffold00076 | 53222  | 60429  | 7208   | 0.96  | C_unshiu_00909 | 102308 | 95101  | 7208   | 6.21  | 99.94 |
| scaffold00076 | 59580  | 89156  | 29577  | 3.92  | C_unshiu_00909 | 95105  | 65544  | 29562  | 25.47 | 99.93 |
| scaffold00076 | 90395  | 92242  | 1848   | 0.25  | C_unshiu_00909 | 63879  | 62035  | 1845   | 1.59  | 99.84 |
| scaffold00076 | 99234  | 114756 | 15523  | 2.06  | C_unshiu_02814 | 15556  | 1      | 15556  | 88.45 | 98.62 |
| scaffold00076 | 109590 | 134640 | 25051  | 3.32  | C_unshiu_00385 | 226684 | 201610 | 25075  | 11.06 | 99.57 |
| scaffold00076 | 135599 | 168094 | 32496  | 4.31  | C_unshiu_00385 | 200187 | 167692 | 32496  | 14.34 | 99.98 |
| scaffold00076 | 167312 | 308718 | 141407 | 18.75 | C_unshiu_00385 | 162371 | 20957  | 141415 | 62.38 | 99.98 |
| scaffold00076 | 319103 | 366608 | 47506  | 6.3   | C_unshiu_00296 | 183384 | 135871 | 47514  | 17.68 | 99.93 |
| scaffold00076 | 366609 | 369159 | 2551   | 0.34  | C_unshiu_00734 | 17167  | 14617  | 2551   | 1.85  | 100   |
| scaffold00076 | 369153 | 382480 | 13328  | 1.77  | C_unshiu_00296 | 132952 | 119625 | 13328  | 4.96  | 99.96 |
| scaffold00076 | 384852 | 389923 | 5072   | 0.67  | C_unshiu_00296 | 116569 | 111497 | 5073   | 1.89  | 98.52 |
| scaffold00076 | 389213 | 390217 | 1005   | 0.13  | C_unshiu_00296 | 112051 | 111047 | 1005   | 0.37  | 99.2  |
| scaffold00076 | 392718 | 394187 | 1470   | 0.19  | C_unshiu_00060 | 220850 | 222318 | 1469   | 0.25  | 98.64 |
| scaffold00076 | 395184 | 399564 | 4381   | 0.58  | C_unshiu_00577 | 168835 | 164452 | 4384   | 2.55  | 98.84 |
| scaffold00076 | 399570 | 450986 | 51417  | 6.82  | C_unshiu_00824 | 2953   | 54369  | 51417  | 40.84 | 100   |
| scaffold00076 | 450987 | 452453 | 1467   | 0.19  | C_unshiu_00722 | 31089  | 29623  | 1467   | 1.04  | 100   |
| scaffold00076 | 452734 | 459624 | 6891   | 0.91  | C_unshiu_01613 | 9435   | 16329  | 6895   | 12.11 | 99.68 |
| scaffold00076 | 464940 | 486851 | 21912  | 2.91  | C_unshiu_01613 | 15727  | 37653  | 21927  | 38.51 | 99.88 |
| scaffold00076 | 488717 | 489782 | 1066   | 0.14  | C_unshiu_01613 | 39884  | 40950  | 1067   | 1.87  | 99.91 |
| scaffold00076 | 491519 | 493594 | 2076   | 0.28  | C_unshiu_01613 | 51295  | 53370  | 2076   | 3.65  | 99.08 |
| scaffold00076 | 492113 | 530253 | 38141  | 5.06  | C_unshiu_00824 | 69567  | 107710 | 38144  | 30.3  | 99.77 |
| scaffold00076 | 533918 | 539276 | 5359   | 0.71  | C_unshiu_00824 | 110346 | 115704 | 5359   | 4.26  | 100   |
| scaffold00076 | 541069 | 582261 | 41193  | 5.46  | C_unshiu_00545 | 178563 | 137371 | 41193  | 22.99 | 99.91 |
| scaffold00076 | 585184 | 599532 | 14349  | 1.9   | C_unshiu_00545 | 132401 | 118048 | 14354  | 8.01  | 99.78 |
| scaffold00076 | 604893 | 620141 | 15249  | 2.02  | C_unshiu_00545 | 112868 | 97622  | 15247  | 8.51  | 99.72 |
| scaffold00076 | 621209 | 710037 | 88829  | 11.78 | C_unshiu_00545 | 95791  | 6962   | 88830  | 49.57 | 99.99 |
| scaffold00076 | 715268 | 718238 | 2971   | 0.39  | C_unshiu_00953 | 52336  | 49402  | 2935   | 2.64  | 98.38 |
| scaffold00076 | 724679 | 729575 | 4897   | 0.65  | C_unshiu_00953 | 42285  | 37389  | 4897   | 4.4   | 100   |
| scaffold00076 | 729595 | 732116 | 2522   | 0.33  | C_unshiu_00953 | 35655  | 33134  | 2522   | 2.27  | 100   |
| scaffold00076 | 732457 | 737892 | 5436   | 0.72  | C_unshiu_00953 | 32551  | 27126  | 5426   | 4.88  | 99.67 |
| scaffold00076 | 737894 | 739480 | 1587   | 0.21  | C_unshiu_00308 | 56586  | 55000  | 1587   | 0.61  | 100   |
| scaffold00076 | 739480 | 740787 | 1308   | 0.17  | C_unshiu_00953 | 25222  | 23915  | 1308   | 1.18  | 99.92 |
| scaffold00076 | 742170 | 743178 | 1009   | 0.13  | C_unshiu_01278 | 25494  | 24486  | 1009   | 1.28  | 100   |
| scaffold00076 | 743328 | 744525 | 1198   | 0.16  | C_unshiu_00442 | 29165  | 30364  | 1200   | 0.57  | 99.83 |
| scaffold00076 | 746174 | 747294 | 1121   | 0.15  | C_unshiu_02980 | 6721   | 7841   | 1121   | 8.32  | 99.73 |
| scaffold00076 | 751082 | 754236 | 3155   | 0.42  | C_unshiu_00442 | 36107  | 39263  | 3157   | 1.5   | 99.24 |
| scaffold00083 | 1      | 23014  | 23014  | 3.12  | C_unshiu_00140 | 82465  | 105448 | 22984  | 5.7   | 99.83 |
| scaffold00083 | 3025   | 72603  | 69579  | 9.42  | C_unshiu_00140 | 85471  | 155035 | 69565  | 17.27 | 99.97 |
| scaffold00083 | 72578  | 98628  | 26051  | 3.53  | C_unshiu_00140 | 155340 | 181393 | 26054  | 6.47  | 99.93 |
| scaffold00083 | 98299  | 204521 | 106223 | 14.38 | C_unshiu_00140 | 183285 | 289505 | 106221 | 26.36 | 99.97 |
| scaffold00083 | 204543 | 304547 | 100005 | 13.54 | C_unshiu_00140 | 290329 | 390295 | 99967  | 24.81 | 99.85 |
| scaffold00083 | 309721 | 311096 | 1376   | 0.19  | C_unshiu_00319 | 1493   | 121    | 1373   | 0.54  | 98.11 |
| scaffold00083 | 318565 | 356721 | 38157  | 5.17  | C_unshiu_00532 | 176186 | 138029 | 38158  | 20.8  | 99.99 |
| scaffold00083 | 360994 | 362277 | 1284   | 0.17  | C_unshiu_00532 | 134596 | 133313 | 1284   | 0.7   | 100   |
| scaffold00083 | 362324 | 365669 | 3346   | 0.45  | C_unshiu_00532 | 132916 | 129542 | 3375   | 1.84  | 99.14 |
| scaffold00083 | 365760 | 474076 | 108317 | 14.67 | C_unshiu_00532 | 128886 | 20715  | 108172 | 58.96 | 99.61 |
| scaffold00083 | 474206 | 494844 | 20639  | 2.79  | C_unshiu_00532 | 20643  | 1      | 20643  | 11.25 | 99.88 |
| scaffold00083 | 485435 | 561137 | 75703  | 10.25 | C_unshiu_00440 | 211731 | 136031 | 75701  | 35.75 | 99.88 |
| scaffold00083 | 560966 | 597123 | 36158  | 4.9   | C_unshiu_00440 | 135862 | 99705  | 36158  | 17.08 | 99.98 |
| scaffold00083 | 596720 | 621579 | 24860  | 3.37  | C_unshiu_00440 | 99709  | 74858  | 24852  | 11.74 | 99.96 |
| scaffold00083 | 630907 | 675754 | 44848  | 6.07  | C_unshiu_00440 | 64226  | 19380  | 44847  | 21.18 | 99.99 |
| scaffold00083 | 677998 | 694543 | 16546  | 2.24  | C_unshiu_00440 | 16617  | 68     | 16550  | 7.82  | 99.86 |
| scaffold00083 | 708104 | 736188 | 28085  | 3.8   | C_unshiu_02253 | 28188  | 143    | 28046  | 88.88 | 99.52 |
| scaffold00090 | 3719   | 33742  | 30024  | 4.24  | C_unshiu_00388 | 222994 | 192954 | 30041  | 13.31 | 99.82 |
| scaffold00090 | 36814  | 51507  | 14694  | 2.08  | C_unshiu_00502 | 1986   | 16693  | 14708  | 7.7   | 98.64 |
| scaffold00090 | 56207  | 71946  | 15740  | 2.22  | C_unshiu_00388 | 179983 | 164231 | 15753  | 6.98  | 99.51 |
| scaffold00090 | 72415  | 74630  | 2216   | 0.31  | C_unshiu_00388 | 164785 | 162571 | 2215   | 0.98  | 99.37 |
| scaffold00090 | 77488  | 106516 | 29029  | 4.1   | C_unshiu_00502 | 24199  | 53252  | 29054  | 15.21 | 99.61 |

|               |        |        |       |       |                |        |        |       |       |       |
|---------------|--------|--------|-------|-------|----------------|--------|--------|-------|-------|-------|
| scaffold00090 | 109275 | 112892 | 3618  | 0.51  | C_unshiu_00502 | 56059  | 59677  | 3619  | 1.89  | 98.87 |
| scaffold00090 | 130801 | 137754 | 6954  | 0.98  | C_unshiu_00502 | 109824 | 116796 | 6973  | 3.65  | 99.25 |
| scaffold00090 | 143053 | 145313 | 2261  | 0.32  | C_unshiu_00502 | 123103 | 125373 | 2271  | 1.19  | 98.86 |
| scaffold00090 | 180891 | 183639 | 2749  | 0.39  | C_unshiu_00502 | 150844 | 153592 | 2749  | 1.44  | 99.31 |
| scaffold00090 | 183645 | 203516 | 19872 | 2.81  | C_unshiu_00502 | 154061 | 173960 | 19900 | 10.42 | 98.93 |
| scaffold00090 | 203512 | 208251 | 4740  | 0.67  | C_unshiu_00502 | 174160 | 178905 | 4746  | 2.48  | 99.43 |
| scaffold00090 | 209589 | 210898 | 1310  | 0.19  | C_unshiu_00502 | 182276 | 183585 | 1310  | 0.69  | 100   |
| scaffold00090 | 213761 | 214847 | 1087  | 0.15  | C_unshiu_00502 | 181187 | 182274 | 1088  | 0.57  | 99.08 |
| scaffold00090 | 215233 | 218017 | 2785  | 0.39  | C_unshiu_00471 | 41454  | 44210  | 2757  | 1.37  | 98.53 |
| scaffold00090 | 218773 | 219910 | 1138  | 0.16  | C_unshiu_00880 | 97108  | 98245  | 1138  | 0.95  | 100   |
| scaffold00090 | 219903 | 230321 | 10419 | 1.47  | C_unshiu_00471 | 46127  | 56589  | 10463 | 5.21  | 98.81 |
| scaffold00090 | 238544 | 241440 | 2897  | 0.41  | C_unshiu_00471 | 57392  | 60295  | 2904  | 1.45  | 98.48 |
| scaffold00090 | 263845 | 279219 | 15375 | 2.17  | C_unshiu_01826 | 47455  | 32065  | 15391 | 32.43 | 98    |
| scaffold00090 | 281723 | 284702 | 2980  | 0.42  | C_unshiu_00502 | 102141 | 105130 | 2990  | 1.57  | 99.36 |
| scaffold00090 | 281723 | 284702 | 2980  | 0.42  | C_unshiu_01826 | 31489  | 28510  | 2980  | 6.28  | 99.83 |
| scaffold00090 | 295629 | 298313 | 2685  | 0.38  | C_unshiu_00471 | 113647 | 116331 | 2685  | 1.34  | 98.73 |
| scaffold00090 | 305435 | 309868 | 4434  | 0.63  | C_unshiu_01826 | 4447   | 1      | 4447  | 9.37  | 98.94 |
| scaffold00090 | 307658 | 310986 | 3329  | 0.47  | C_unshiu_00471 | 124259 | 127603 | 3345  | 1.66  | 98.33 |
| scaffold00090 | 314049 | 355505 | 41457 | 5.86  | C_unshiu_00471 | 129620 | 171251 | 41632 | 20.72 | 98.15 |
| scaffold00090 | 364701 | 374942 | 10242 | 1.45  | C_unshiu_01214 | 50403  | 40167  | 10237 | 12.17 | 99    |
| scaffold00090 | 374284 | 387556 | 13273 | 1.88  | C_unshiu_01214 | 38273  | 24954  | 13320 | 15.84 | 98.43 |
| scaffold00090 | 388517 | 407245 | 18729 | 2.65  | C_unshiu_01214 | 24289  | 5578   | 18712 | 22.25 | 99.62 |
| scaffold00090 | 407238 | 410722 | 3485  | 0.49  | C_unshiu_00639 | 126384 | 122900 | 3485  | 2.2   | 100   |
| scaffold00090 | 413701 | 415646 | 1946  | 0.27  | C_unshiu_00923 | 100626 | 98676  | 1951  | 1.7   | 98.87 |
| scaffold00090 | 415395 | 418463 | 3069  | 0.43  | C_unshiu_00923 | 98663  | 95585  | 3079  | 2.69  | 99.19 |
| scaffold00090 | 418482 | 420491 | 2010  | 0.28  | C_unshiu_00923 | 95276  | 93271  | 2006  | 1.75  | 99.7  |
| scaffold00090 | 421807 | 427191 | 5385  | 0.76  | C_unshiu_00923 | 92192  | 86846  | 5347  | 4.67  | 98.72 |
| scaffold00090 | 427381 | 434677 | 7297  | 1.03  | C_unshiu_00923 | 86195  | 78884  | 7312  | 6.39  | 99.36 |
| scaffold00090 | 434674 | 437753 | 3080  | 0.44  | C_unshiu_00923 | 75564  | 72484  | 3081  | 2.69  | 99.25 |
| scaffold00090 | 447364 | 454895 | 7532  | 1.06  | C_unshiu_00923 | 63138  | 55589  | 7550  | 6.6   | 99.4  |
| scaffold00090 | 454980 | 461894 | 6915  | 0.98  | C_unshiu_00923 | 55282  | 48387  | 6896  | 6.03  | 98.26 |
| scaffold00090 | 465666 | 474185 | 8520  | 1.2   | C_unshiu_00923 | 44905  | 36376  | 8530  | 7.45  | 98.08 |
| scaffold00090 | 483927 | 490914 | 6988  | 0.99  | C_unshiu_02414 | 14662  | 7720   | 6943  | 25.75 | 98.43 |
| scaffold00090 | 497880 | 505262 | 7383  | 1.04  | C_unshiu_00923 | 21388  | 14003  | 7386  | 6.45  | 98.88 |
| scaffold00090 | 506259 | 516104 | 9846  | 1.39  | C_unshiu_00923 | 13717  | 3826   | 9892  | 8.64  | 98.33 |
| scaffold00090 | 523087 | 538245 | 15159 | 2.14  | C_unshiu_01282 | 5182   | 20360  | 15179 | 19.31 | 98.21 |
| scaffold00090 | 538246 | 541444 | 3199  | 0.45  | C_unshiu_01282 | 20845  | 24060  | 3216  | 4.09  | 98.29 |
| scaffold00090 | 578759 | 581028 | 2270  | 0.32  | C_unshiu_01148 | 22908  | 25188  | 2281  | 2.5   | 98.47 |
| scaffold00090 | 594734 | 604028 | 9295  | 1.31  | C_unshiu_01307 | 16404  | 25778  | 9375  | 12.24 | 98.66 |
| scaffold00090 | 622131 | 624381 | 2251  | 0.32  | C_unshiu_01908 | 1      | 2243   | 2243  | 5.06  | 99.2  |
| scaffold00090 | 624388 | 641876 | 17489 | 2.47  | C_unshiu_01307 | 44602  | 62008  | 17407 | 22.72 | 98.84 |
| scaffold00090 | 641877 | 645233 | 3357  | 0.47  | C_unshiu_00196 | 208419 | 205063 | 3357  | 0.99  | 100   |
| scaffold00090 | 646226 | 649241 | 3016  | 0.43  | C_unshiu_01307 | 69462  | 72480  | 3019  | 3.94  | 98.08 |
| scaffold00090 | 666394 | 688405 | 22012 | 3.11  | C_unshiu_00054 | 27040  | 49053  | 22014 | 3.7   | 99.42 |
| scaffold00090 | 689729 | 706868 | 17140 | 2.42  | C_unshiu_00054 | 56328  | 73469  | 17142 | 2.88  | 99.98 |
| scaffold00099 | 86     | 13190  | 13105 | 1.99  | C_unshiu_00770 | 42875  | 55953  | 13079 | 9.84  | 99.66 |
| scaffold00099 | 13672  | 44238  | 30567 | 4.64  | C_unshiu_00770 | 57219  | 87823  | 30605 | 23.03 | 99.85 |
| scaffold00099 | 44507  | 73689  | 29183 | 4.43  | C_unshiu_00770 | 88490  | 117671 | 29182 | 21.95 | 99.98 |
| scaffold00099 | 78505  | 79651  | 1147  | 0.17  | C_unshiu_00770 | 121997 | 123149 | 1153  | 0.87  | 98.18 |
| scaffold00099 | 119199 | 136303 | 17105 | 2.6   | C_unshiu_00526 | 73020  | 55916  | 17105 | 9.27  | 100   |
| scaffold00099 | 137663 | 149974 | 12312 | 1.87  | C_unshiu_00526 | 54071  | 41767  | 12305 | 6.67  | 99.85 |
| scaffold00099 | 154794 | 194119 | 39326 | 5.97  | C_unshiu_00526 | 39304  | 1      | 39304 | 21.3  | 99.74 |
| scaffold00099 | 201149 | 207105 | 5957  | 0.9   | C_unshiu_00692 | 66449  | 60547  | 5903  | 4.07  | 98.49 |
| scaffold00099 | 203393 | 222412 | 19020 | 2.89  | C_unshiu_00692 | 56693  | 37739  | 18955 | 13.05 | 99.43 |
| scaffold00099 | 226052 | 251018 | 24967 | 3.79  | C_unshiu_00692 | 34430  | 9464   | 24967 | 17.19 | 100   |
| scaffold00099 | 252393 | 259836 | 7444  | 1.13  | C_unshiu_00692 | 7438   | 1      | 7438  | 5.12  | 99.65 |
| scaffold00099 | 256012 | 262581 | 6570  | 1     | C_unshiu_01377 | 67767  | 61204  | 6564  | 9.13  | 99.5  |
| scaffold00099 | 265054 | 309036 | 43983 | 6.68  | C_unshiu_01377 | 58404  | 14424  | 43981 | 61.2  | 99.95 |
| scaffold00099 | 310970 | 322924 | 11955 | 1.82  | C_unshiu_01377 | 11970  | 1      | 11970 | 16.66 | 99.77 |
| scaffold00099 | 317123 | 397191 | 80069 | 12.16 | C_unshiu_01190 | 6384   | 86374  | 79991 | 92.61 | 99.47 |
| scaffold00099 | 396899 | 426611 | 29713 | 4.51  | C_unshiu_01582 | 9142   | 38829  | 29688 | 50.7  | 99.6  |
| scaffold00099 | 425398 | 459088 | 33691 | 5.12  | C_unshiu_00246 | 346    | 34036  | 33691 | 11.27 | 100   |
| scaffold00099 | 459193 | 523551 | 64359 | 9.77  | C_unshiu_00246 | 34425  | 98708  | 64284 | 21.51 | 99.57 |
| scaffold00099 | 524421 | 565627 | 41207 | 6.26  | C_unshiu_00246 | 98857  | 140068 | 41212 | 13.79 | 99.84 |
| scaffold00099 | 568774 | 629281 | 60508 | 9.19  | C_unshiu_00246 | 141809 | 202323 | 60515 | 20.25 | 99.93 |
| scaffold00099 | 628801 | 640279 | 11479 | 1.74  | C_unshiu_00246 | 202144 | 213611 | 11468 | 3.84  | 99.31 |
| scaffold00099 | 644820 | 656662 | 11843 | 1.8   | C_unshiu_00246 | 217600 | 229445 | 11846 | 3.96  | 99.97 |
| scaffold00103 | 1      | 81090  | 81090 | 12.6  | C_unshiu_00176 | 233368 | 152273 | 81096 | 22.44 | 99.99 |
| scaffold00103 | 61093  | 107959 | 46867 | 7.28  | C_unshiu_00176 | 172277 | 125440 | 46838 | 12.96 | 99.83 |
| scaffold00103 | 104724 | 124328 | 19605 | 3.05  | C_unshiu_00184 | 351980 | 332359 | 19622 | 5.57  | 99.78 |
| scaffold00103 | 126360 | 153845 | 27486 | 4.27  | C_unshiu_00184 | 329023 | 301539 | 27485 | 7.81  | 99.91 |
| scaffold00103 | 153145 | 183157 | 30013 | 4.66  | C_unshiu_00184 | 301543 | 271525 | 30019 | 8.53  | 99.89 |
| scaffold00103 | 183142 | 212853 | 29712 | 4.61  | C_unshiu_00184 | 271161 | 241361 | 29801 | 8.47  | 99.13 |
| scaffold00103 | 213000 | 230670 | 17671 | 2.74  | C_unshiu_00184 | 240811 | 223135 | 17677 | 5.02  | 99.22 |
| scaffold00103 | 230668 | 255425 | 24758 | 3.85  | C_unshiu_00184 | 222660 | 197913 | 24748 | 7.03  | 99.71 |
| scaffold00103 | 255501 | 258064 | 2564  | 0.4   | C_unshiu_00184 | 197736 | 195172 | 2565  | 0.73  | 99.57 |
| scaffold00103 | 257861 | 289826 | 31966 | 4.97  | C_unshiu_00184 | 195163 | 163116 | 32048 | 9.11  | 99.42 |
| scaffold00103 | 290409 | 316872 | 26464 | 4.11  | C_unshiu_00184 | 163120 | 136609 | 26512 | 7.53  | 99.59 |
| scaffold00103 | 317315 | 324480 | 7166  | 1.11  | C_unshiu_00184 | 136695 | 129541 | 7155  | 2.03  | 99.53 |

|               |        |        |       |       |                |        |        |       |       |       |
|---------------|--------|--------|-------|-------|----------------|--------|--------|-------|-------|-------|
| scaffold00103 | 324643 | 364044 | 39402 | 6.12  | C_unshiu_00184 | 129276 | 89779  | 39498 | 11.22 | 98.96 |
| scaffold00103 | 366680 | 386958 | 20279 | 3.15  | C_unshiu_00184 | 87817  | 67473  | 20345 | 5.78  | 98.03 |
| scaffold00103 | 387153 | 393106 | 5954  | 0.92  | C_unshiu_00184 | 67545  | 61593  | 5953  | 1.69  | 98.99 |
| scaffold00103 | 393100 | 395976 | 2877  | 0.45  | C_unshiu_00184 | 59673  | 56787  | 2887  | 0.82  | 99.1  |
| scaffold00103 | 406954 | 410150 | 3197  | 0.5   | C_unshiu_00184 | 42029  | 38839  | 3191  | 0.91  | 98.78 |
| scaffold00103 | 417203 | 422372 | 5170  | 0.8   | C_unshiu_00184 | 37712  | 32556  | 5157  | 1.47  | 98.26 |
| scaffold00103 | 423910 | 426358 | 2449  | 0.38  | C_unshiu_01711 | 1      | 2451   | 2451  | 4.71  | 99.55 |
| scaffold00103 | 427484 | 430996 | 3513  | 0.55  | C_unshiu_01711 | 3098   | 6611   | 3514  | 6.75  | 99.29 |
| scaffold00103 | 430905 | 437132 | 6228  | 0.97  | C_unshiu_01711 | 6609   | 12843  | 6235  | 11.97 | 99.31 |
| scaffold00103 | 439658 | 447331 | 7674  | 1.19  | C_unshiu_01711 | 26588  | 34264  | 7677  | 14.74 | 99.14 |
| scaffold00103 | 447236 | 454411 | 7176  | 1.11  | C_unshiu_01711 | 34262  | 41463  | 7202  | 13.83 | 98.2  |
| scaffold00103 | 452721 | 458672 | 5952  | 0.92  | C_unshiu_01218 | 26728  | 32677  | 5950  | 7.09  | 98.26 |
| scaffold00103 | 458883 | 464999 | 6117  | 0.95  | C_unshiu_01218 | 32928  | 39101  | 6174  | 7.36  | 98.22 |
| scaffold00103 | 480805 | 485563 | 4759  | 0.74  | C_unshiu_01218 | 56222  | 60980  | 4759  | 5.67  | 99.41 |
| scaffold00103 | 485494 | 494049 | 8556  | 1.33  | C_unshiu_01218 | 60993  | 69549  | 8557  | 10.19 | 99.3  |
| scaffold00103 | 495330 | 505909 | 10580 | 1.64  | C_unshiu_01218 | 69542  | 80123  | 10582 | 12.61 | 99.62 |
| scaffold00103 | 533079 | 554349 | 21271 | 3.3   | C_unshiu_00999 | 59143  | 37778  | 21366 | 20.13 | 98.64 |
| scaffold00103 | 555396 | 566051 | 10656 | 1.66  | C_unshiu_00999 | 38272  | 27556  | 10717 | 10.1  | 98.49 |
| scaffold00103 | 572004 | 573956 | 1953  | 0.3   | C_unshiu_00999 | 25304  | 23356  | 1949  | 1.84  | 98.57 |
| scaffold00103 | 576187 | 580192 | 4006  | 0.62  | C_unshiu_00999 | 22783  | 18741  | 4043  | 3.81  | 98.2  |
| scaffold00103 | 586850 | 594729 | 7880  | 1.22  | C_unshiu_00999 | 10700  | 2813   | 7888  | 7.43  | 99.24 |
| scaffold00103 | 594902 | 597616 | 2715  | 0.42  | C_unshiu_00999 | 2690   | 1      | 2690  | 2.53  | 98.86 |
| scaffold00103 | 607152 | 609859 | 2708  | 0.42  | C_unshiu_00999 | 18141  | 15434  | 2708  | 2.55  | 100   |
| scaffold00103 | 612905 | 618041 | 5137  | 0.8   | C_unshiu_00957 | 2386   | 7555   | 5170  | 4.66  | 98.78 |
| scaffold00103 | 623036 | 624135 | 1100  | 0.17  | C_unshiu_00383 | 124819 | 125918 | 1100  | 0.48  | 98.09 |
| scaffold00103 | 624722 | 628272 | 3551  | 0.55  | C_unshiu_01211 | 55649  | 59211  | 3563  | 4.23  | 99.41 |
| scaffold00103 | 628938 | 635369 | 6432  | 1     | C_unshiu_01211 | 60481  | 66924  | 6444  | 7.65  | 99.33 |
| scaffold00103 | 636457 | 641260 | 4804  | 0.75  | C_unshiu_00957 | 17863  | 22694  | 4832  | 4.36  | 98.61 |
| scaffold00113 | 1355   | 3648   | 2294  | 0.38  | C_unshiu_01067 | 58459  | 56166  | 2294  | 2.32  | 99.96 |
| scaffold00113 | 5122   | 17472  | 12351 | 2.02  | C_unshiu_00188 | 250381 | 262663 | 12283 | 3.56  | 98.25 |
| scaffold00113 | 20001  | 29810  | 9810  | 1.6   | C_unshiu_00359 | 12307  | 22114  | 9808  | 4.14  | 99.7  |
| scaffold00113 | 34651  | 39750  | 5100  | 0.83  | C_unshiu_00359 | 26982  | 32153  | 5172  | 2.18  | 98.47 |
| scaffold00113 | 40143  | 119729 | 79587 | 13.02 | C_unshiu_00359 | 32947  | 112584 | 79638 | 33.62 | 99.73 |
| scaffold00113 | 119721 | 144826 | 25106 | 4.11  | C_unshiu_00359 | 113829 | 138966 | 25138 | 10.61 | 99.51 |
| scaffold00113 | 146489 | 147817 | 1329  | 0.22  | C_unshiu_00359 | 140855 | 142183 | 1329  | 0.56  | 99.7  |
| scaffold00113 | 147966 | 167486 | 19521 | 3.19  | C_unshiu_00359 | 142185 | 161727 | 19543 | 8.25  | 99.71 |
| scaffold00113 | 168466 | 173873 | 5408  | 0.88  | C_unshiu_00359 | 162372 | 167803 | 5432  | 2.29  | 99.06 |
| scaffold00113 | 174074 | 205645 | 31572 | 5.16  | C_unshiu_00359 | 168454 | 200092 | 31639 | 13.36 | 99.41 |
| scaffold00113 | 206635 | 225819 | 19185 | 3.14  | C_unshiu_00359 | 201950 | 221156 | 19207 | 8.11  | 99.68 |
| scaffold00113 | 239596 | 243064 | 3469  | 0.57  | C_unshiu_00359 | 233202 | 236672 | 3471  | 1.47  | 98.11 |
| scaffold00113 | 243646 | 259722 | 16077 | 2.63  | C_unshiu_00913 | 25287  | 41349  | 16063 | 13.89 | 99.4  |
| scaffold00113 | 266172 | 280218 | 14047 | 2.3   | C_unshiu_00913 | 47564  | 61652  | 14089 | 12.18 | 99.23 |
| scaffold00113 | 280260 | 288859 | 8600  | 1.41  | C_unshiu_00913 | 61749  | 70349  | 8601  | 7.44  | 99.29 |
| scaffold00113 | 294896 | 303697 | 8802  | 1.44  | C_unshiu_00913 | 82143  | 90946  | 8804  | 7.61  | 99.63 |
| scaffold00113 | 303981 | 314015 | 10035 | 1.64  | C_unshiu_00913 | 91702  | 101744 | 10043 | 8.68  | 99.71 |
| scaffold00113 | 315958 | 322042 | 6085  | 1     | C_unshiu_00913 | 104636 | 110725 | 6090  | 5.27  | 99.59 |
| scaffold00113 | 322045 | 334459 | 12415 | 2.03  | C_unshiu_01277 | 30324  | 17909  | 12416 | 15.71 | 99.61 |
| scaffold00113 | 336209 | 337999 | 1791  | 0.29  | C_unshiu_01277 | 16497  | 14725  | 1773  | 2.24  | 98.49 |
| scaffold00113 | 350871 | 354418 | 3548  | 0.58  | C_unshiu_00879 | 18138  | 14591  | 3548  | 2.97  | 100   |
| scaffold00113 | 357590 | 362022 | 4433  | 0.72  | C_unshiu_01910 | 28544  | 24109  | 4436  | 10.02 | 99.39 |
| scaffold00113 | 362149 | 363950 | 1802  | 0.29  | C_unshiu_01910 | 23684  | 21883  | 1802  | 4.07  | 100   |
| scaffold00113 | 365570 | 371187 | 5618  | 0.92  | C_unshiu_01910 | 19901  | 14284  | 5618  | 12.69 | 100   |
| scaffold00113 | 371197 | 384539 | 13343 | 2.18  | C_unshiu_01255 | 1301   | 14671  | 13371 | 16.6  | 99.22 |
| scaffold00113 | 384535 | 398240 | 13706 | 2.24  | C_unshiu_01255 | 14710  | 28384  | 13675 | 16.97 | 98.36 |
| scaffold00113 | 398257 | 399624 | 1368  | 0.22  | C_unshiu_01255 | 75122  | 76490  | 1369  | 1.7   | 99.93 |
| scaffold00113 | 403149 | 404317 | 1169  | 0.19  | C_unshiu_01255 | 35769  | 36940  | 1172  | 1.45  | 99.49 |
| scaffold00113 | 404888 | 406582 | 1695  | 0.28  | C_unshiu_01255 | 34372  | 36074  | 1703  | 2.11  | 98.53 |
| scaffold00113 | 409872 | 413510 | 3639  | 0.6   | C_unshiu_01255 | 40734  | 44375  | 3642  | 4.52  | 99.84 |
| scaffold00113 | 417801 | 427795 | 9995  | 1.63  | C_unshiu_01255 | 48786  | 58704  | 9919  | 12.31 | 98.2  |
| scaffold00113 | 427818 | 430422 | 2605  | 0.43  | C_unshiu_01255 | 60305  | 62909  | 2605  | 3.23  | 100   |
| scaffold00113 | 432694 | 434985 | 2292  | 0.37  | C_unshiu_01255 | 65852  | 68143  | 2292  | 2.84  | 100   |
| scaffold00113 | 435790 | 439232 | 3443  | 0.56  | C_unshiu_00581 | 169062 | 165617 | 3446  | 2.01  | 99.83 |
| scaffold00113 | 440287 | 469723 | 29437 | 4.81  | C_unshiu_00581 | 164043 | 134537 | 29507 | 17.23 | 99.51 |
| scaffold00113 | 473643 | 476670 | 3028  | 0.5   | C_unshiu_00581 | 129874 | 126876 | 2999  | 1.75  | 98.98 |
| scaffold00113 | 480904 | 484628 | 3725  | 0.61  | C_unshiu_00581 | 124220 | 120487 | 3734  | 2.18  | 99.25 |
| scaffold00113 | 484623 | 490691 | 6069  | 0.99  | C_unshiu_00581 | 119315 | 113230 | 6086  | 3.55  | 99.33 |
| scaffold00113 | 490689 | 504792 | 14104 | 2.31  | C_unshiu_00581 | 112789 | 98694  | 14096 | 8.23  | 99.07 |
| scaffold00113 | 511095 | 514627 | 3533  | 0.58  | C_unshiu_00581 | 92992  | 89455  | 3538  | 2.07  | 98.5  |
| scaffold00113 | 522831 | 524988 | 2158  | 0.35  | C_unshiu_00581 | 81732  | 79561  | 2172  | 1.27  | 98.43 |
| scaffold00113 | 525213 | 532241 | 7029  | 1.15  | C_unshiu_00581 | 79161  | 72126  | 7036  | 4.11  | 99.6  |
| scaffold00113 | 532587 | 539652 | 7066  | 1.16  | C_unshiu_00581 | 72131  | 65063  | 7069  | 4.13  | 99.66 |
| scaffold00113 | 539652 | 543315 | 3664  | 0.6   | C_unshiu_00581 | 64899  | 61208  | 3692  | 2.16  | 98.86 |
| scaffold00113 | 543307 | 570824 | 27518 | 4.5   | C_unshiu_00581 | 61066  | 33540  | 27527 | 16.08 | 99.68 |
| scaffold00113 | 570823 | 575870 | 5048  | 0.83  | C_unshiu_00421 | 98140  | 93093  | 5048  | 2.31  | 100   |
| scaffold00113 | 576069 | 594019 | 17951 | 2.94  | C_unshiu_00581 | 28936  | 11123  | 17814 | 10.41 | 98.59 |
| scaffold00113 | 594044 | 595848 | 1805  | 0.3   | C_unshiu_00581 | 9424   | 7620   | 1805  | 1.05  | 100   |
| scaffold00113 | 596764 | 598411 | 1648  | 0.27  | C_unshiu_00258 | 22558  | 20911  | 1648  | 0.57  | 99.76 |
| scaffold00113 | 599163 | 601092 | 1930  | 0.32  | C_unshiu_00258 | 20751  | 18825  | 1927  | 0.67  | 98.86 |
| scaffold00113 | 601730 | 604792 | 3063  | 0.5   | C_unshiu_00581 | 4387   | 1306   | 3082  | 1.8   | 99.38 |

|               |        |        |        |       |                |        |        |        |       |       |
|---------------|--------|--------|--------|-------|----------------|--------|--------|--------|-------|-------|
| scaffold00113 | 607001 | 611487 | 4487   | 0.73  | C_unshiu_00258 | 27265  | 22783  | 4483   | 1.55  | 98.96 |
| scaffold00118 | 3846   | 7374   | 3529   | 0.6   | C_unshiu_00834 | 115777 | 119304 | 3528   | 2.83  | 99.91 |
| scaffold00118 | 7271   | 12606  | 5336   | 0.91  | C_unshiu_00834 | 119251 | 124563 | 5313   | 4.27  | 98.49 |
| scaffold00118 | 10679  | 40014  | 29336  | 4.98  | C_unshiu_00834 | 115773 | 86431  | 29343  | 23.56 | 99.98 |
| scaffold00118 | 40008  | 41180  | 1173   | 0.2   | C_unshiu_01203 | 46867  | 48039  | 1173   | 1.37  | 100   |
| scaffold00118 | 44374  | 68104  | 23731  | 4.03  | C_unshiu_00834 | 81373  | 57656  | 23718  | 19.04 | 99.33 |
| scaffold00118 | 67724  | 78881  | 11158  | 1.89  | C_unshiu_00834 | 57655  | 46498  | 11158  | 8.96  | 100   |
| scaffold00118 | 80521  | 81840  | 1320   | 0.22  | C_unshiu_01071 | 19079  | 17760  | 1320   | 1.34  | 100   |
| scaffold00118 | 84368  | 95663  | 11296  | 1.92  | C_unshiu_00672 | 73023  | 61753  | 11271  | 7.47  | 99.25 |
| scaffold00118 | 100931 | 156406 | 55476  | 9.42  | C_unshiu_00672 | 56852  | 1415   | 55438  | 36.73 | 99.66 |
| scaffold00118 | 156436 | 220285 | 63850  | 10.84 | C_unshiu_00111 | 434432 | 370618 | 63815  | 14.54 | 99.72 |
| scaffold00118 | 220494 | 230497 | 10004  | 1.7   | C_unshiu_00111 | 370356 | 360353 | 10004  | 2.28  | 100   |
| scaffold00118 | 232394 | 233624 | 1231   | 0.21  | C_unshiu_00111 | 357844 | 356613 | 1232   | 0.28  | 98.38 |
| scaffold00118 | 232625 | 252383 | 18759  | 3.18  | C_unshiu_00111 | 356364 | 337606 | 18759  | 4.27  | 100   |
| scaffold00118 | 254058 | 264096 | 10039  | 1.7   | C_unshiu_00111 | 335620 | 325582 | 10039  | 2.29  | 100   |
| scaffold00118 | 264883 | 269590 | 4708   | 0.8   | C_unshiu_00111 | 324351 | 319647 | 4705   | 1.07  | 99.77 |
| scaffold00118 | 269666 | 271181 | 1516   | 0.26  | C_unshiu_00111 | 319009 | 317494 | 1516   | 0.35  | 100   |
| scaffold00118 | 276214 | 343007 | 66794  | 11.34 | C_unshiu_00111 | 313422 | 246639 | 66784  | 15.21 | 99.94 |
| scaffold00118 | 323003 | 374582 | 51580  | 8.76  | C_unshiu_00111 | 266634 | 215064 | 51571  | 11.75 | 99.91 |
| scaffold00118 | 374890 | 405962 | 31073  | 5.28  | C_unshiu_00111 | 214527 | 183455 | 31073  | 7.08  | 99.99 |
| scaffold00118 | 406426 | 469250 | 62825  | 10.67 | C_unshiu_00111 | 182345 | 119510 | 62836  | 14.31 | 99.97 |
| scaffold00118 | 449263 | 491832 | 42570  | 7.23  | C_unshiu_00111 | 139503 | 96934  | 42570  | 9.7   | 99.97 |
| scaffold00118 | 471822 | 559848 | 88027  | 14.95 | C_unshiu_00111 | 116938 | 28898  | 88041  | 20.06 | 99.9  |
| scaffold00118 | 560364 | 587834 | 27471  | 4.66  | C_unshiu_00111 | 28484  | 1043   | 27442  | 6.25  | 99.65 |
| scaffold00122 | 1      | 21420  | 21420  | 3.72  | C_unshiu_00987 | 27675  | 49095  | 21421  | 19.83 | 99.99 |
| scaffold00122 | 25921  | 28855  | 2935   | 0.51  | C_unshiu_00188 | 323141 | 326075 | 2935   | 0.85  | 100   |
| scaffold00122 | 28854  | 65960  | 37107  | 6.44  | C_unshiu_00987 | 56595  | 93750  | 37156  | 34.4  | 99.8  |
| scaffold00122 | 67603  | 68892  | 1290   | 0.22  | C_unshiu_00829 | 108350 | 107066 | 1285   | 1.03  | 98.53 |
| scaffold00122 | 68907  | 81588  | 12682  | 2.2   | C_unshiu_00987 | 95320  | 107999 | 12680  | 11.74 | 99.98 |
| scaffold00122 | 74845  | 114782 | 39938  | 6.93  | C_unshiu_01842 | 1      | 39938  | 39938  | 85.22 | 100   |
| scaffold00122 | 114798 | 120524 | 5727   | 0.99  | C_unshiu_01842 | 40465  | 46193  | 5729   | 12.22 | 99.97 |
| scaffold00122 | 159652 | 212191 | 52540  | 9.12  | C_unshiu_00403 | 18     | 52576  | 52559  | 23.66 | 99.87 |
| scaffold00122 | 212586 | 217594 | 5009   | 0.87  | C_unshiu_00403 | 53524  | 58532  | 5009   | 2.25  | 100   |
| scaffold00122 | 217965 | 345688 | 127724 | 22.18 | C_unshiu_00403 | 59344  | 187073 | 127730 | 57.49 | 99.95 |
| scaffold00122 | 350957 | 377867 | 26911  | 4.67  | C_unshiu_00403 | 186677 | 213561 | 26885  | 12.1  | 99.81 |
| scaffold00122 | 377869 | 381354 | 3486   | 0.61  | C_unshiu_00403 | 215006 | 218491 | 3486   | 1.57  | 99.97 |
| scaffold00122 | 383014 | 384523 | 1510   | 0.26  | C_unshiu_00403 | 220627 | 222131 | 1505   | 0.68  | 99.34 |
| scaffold00122 | 390186 | 417466 | 27281  | 4.74  | C_unshiu_00107 | 49645  | 76911  | 27267  | 6.1   | 99.86 |
| scaffold00122 | 418127 | 434584 | 16458  | 2.86  | C_unshiu_00107 | 78175  | 94446  | 16272  | 3.64  | 98.33 |
| scaffold00122 | 433566 | 451396 | 17831  | 3.1   | C_unshiu_00107 | 94447  | 112134 | 17688  | 3.96  | 98.88 |
| scaffold00122 | 452849 | 463422 | 10574  | 1.84  | C_unshiu_00107 | 113613 | 124185 | 10573  | 2.36  | 99.74 |
| scaffold00122 | 462938 | 469796 | 6859   | 1.19  | C_unshiu_00107 | 124664 | 131522 | 6859   | 1.53  | 99.97 |
| scaffold00122 | 470019 | 505447 | 35429  | 6.15  | C_unshiu_00107 | 132112 | 167545 | 35434  | 7.92  | 99.54 |
| scaffold00122 | 485448 | 557571 | 72124  | 12.52 | C_unshiu_00107 | 147516 | 219681 | 72166  | 16.14 | 99.94 |
| scaffold00122 | 537591 | 573286 | 35696  | 6.2   | C_unshiu_00107 | 199689 | 235393 | 35705  | 7.99  | 99.94 |
| scaffold00134 | 7279   | 29858  | 22580  | 4.29  | C_unshiu_02480 | 25190  | 2636   | 22555  | 89.54 | 99.73 |
| scaffold00134 | 41079  | 42116  | 1038   | 0.2   | C_unshiu_00080 | 229707 | 230744 | 1038   | 0.21  | 98.94 |
| scaffold00134 | 44505  | 60322  | 15818  | 3     | C_unshiu_00434 | 161757 | 177590 | 15834  | 7.41  | 99.54 |
| scaffold00134 | 57596  | 69222  | 11627  | 2.21  | C_unshiu_02793 | 18004  | 6377   | 11628  | 64.59 | 99.79 |
| scaffold00134 | 79737  | 87620  | 7884   | 1.5   | C_unshiu_02068 | 34716  | 26849  | 7868   | 20.69 | 99.32 |
| scaffold00134 | 94129  | 107087 | 12959  | 2.46  | C_unshiu_02068 | 19655  | 6697   | 12959  | 34.08 | 100   |
| scaffold00134 | 109555 | 113145 | 3591   | 0.68  | C_unshiu_02068 | 5555   | 1963   | 3593   | 9.45  | 99.94 |
| scaffold00134 | 117596 | 132656 | 15061  | 2.86  | C_unshiu_02808 | 2670   | 17727  | 15058  | 84.94 | 99.95 |
| scaffold00134 | 146279 | 148237 | 1959   | 0.37  | C_unshiu_00688 | 43883  | 41959  | 1925   | 1.31  | 98.21 |
| scaffold00134 | 169382 | 196552 | 27171  | 5.16  | C_unshiu_00080 | 135663 | 108543 | 27121  | 5.5   | 99.36 |
| scaffold00134 | 196569 | 197601 | 1033   | 0.2   | C_unshiu_01672 | 34315  | 35348  | 1034   | 1.92  | 98.65 |
| scaffold00134 | 199012 | 208133 | 9122   | 1.73  | C_unshiu_01672 | 36546  | 45709  | 9164   | 16.97 | 98.64 |
| scaffold00134 | 213695 | 233820 | 20126  | 3.82  | C_unshiu_00080 | 96055  | 75956  | 20100  | 4.08  | 98.63 |
| scaffold00134 | 239396 | 253952 | 14557  | 2.76  | C_unshiu_00080 | 68968  | 54409  | 14560  | 2.95  | 99.96 |
| scaffold00134 | 269643 | 276327 | 6685   | 1.27  | C_unshiu_02702 | 10571  | 3959   | 6613   | 33.36 | 98.52 |
| scaffold00134 | 276348 | 277702 | 1355   | 0.26  | C_unshiu_02702 | 2351   | 997    | 1355   | 6.83  | 99.41 |
| scaffold00134 | 284162 | 329444 | 45283  | 8.6   | C_unshiu_00228 | 221830 | 176541 | 45290  | 14.63 | 99.98 |
| scaffold00134 | 337433 | 338890 | 1458   | 0.28  | C_unshiu_00196 | 207118 | 208575 | 1458   | 0.43  | 100   |
| scaffold00134 | 338885 | 439891 | 101007 | 19.18 | C_unshiu_00228 | 176141 | 75131  | 101011 | 32.62 | 99.96 |
| scaffold00134 | 439901 | 513848 | 73948  | 14.04 | C_unshiu_00228 | 73909  | 1      | 73909  | 23.87 | 99.8  |
| scaffold00136 | 3420   | 9144   | 5725   | 1.11  | C_unshiu_00075 | 35     | 5716   | 5682   | 1.12  | 98.43 |
| scaffold00136 | 9632   | 13218  | 3587   | 0.7   | C_unshiu_00321 | 155193 | 151607 | 3587   | 1.4   | 100   |
| scaffold00136 | 13210  | 33146  | 19937  | 3.86  | C_unshiu_00075 | 8914   | 28835  | 19922  | 3.91  | 99.76 |
| scaffold00136 | 37294  | 38657  | 1364   | 0.26  | C_unshiu_00075 | 32176  | 33533  | 1358   | 0.27  | 98.83 |
| scaffold00136 | 43060  | 125733 | 82674  | 16.03 | C_unshiu_00075 | 36749  | 119425 | 82677  | 16.24 | 99.73 |
| scaffold00136 | 125976 | 312315 | 186340 | 36.12 | C_unshiu_00075 | 120166 | 306472 | 186307 | 36.6  | 99.95 |
| scaffold00136 | 314595 | 318544 | 3950   | 0.77  | C_unshiu_00075 | 307444 | 311393 | 3950   | 0.78  | 99.85 |
| scaffold00136 | 318577 | 319647 | 1071   | 0.21  | C_unshiu_00075 | 311285 | 312355 | 1071   | 0.21  | 99.72 |
| scaffold00136 | 321754 | 334044 | 12291  | 2.38  | C_unshiu_00075 | 313235 | 325527 | 12293  | 2.42  | 99.96 |
| scaffold00136 | 334038 | 385348 | 51311  | 9.95  | C_unshiu_00075 | 325575 | 376891 | 51317  | 10.08 | 99.51 |
| scaffold00136 | 387262 | 394527 | 7266   | 1.41  | C_unshiu_00075 | 374711 | 381978 | 7268   | 1.43  | 99.83 |
| scaffold00136 | 398405 | 514658 | 116254 | 22.54 | C_unshiu_00075 | 384068 | 500288 | 116221 | 22.83 | 99.89 |
| scaffold00137 | 2318   | 4166   | 1849   | 0.36  | C_unshiu_00458 | 143634 | 145481 | 1848   | 0.9   | 99.46 |
| scaffold00137 | 9695   | 22289  | 12595  | 2.44  | C_unshiu_00290 | 197843 | 185241 | 12603  | 4.66  | 98.09 |

|               |        |        |       |       |                |        |        |       |       |       |
|---------------|--------|--------|-------|-------|----------------|--------|--------|-------|-------|-------|
| scaffold00137 | 25331  | 29961  | 4631  | 0.9   | C_unshiu_00290 | 182966 | 178336 | 4631  | 1.71  | 100   |
| scaffold00137 | 30640  | 38850  | 8211  | 1.59  | C_unshiu_00290 | 179777 | 171580 | 8198  | 3.03  | 98.13 |
| scaffold00137 | 49444  | 64092  | 14649 | 2.84  | C_unshiu_00290 | 160343 | 145679 | 14665 | 5.42  | 99.14 |
| scaffold00137 | 72424  | 81235  | 8812  | 1.71  | C_unshiu_00290 | 138548 | 129779 | 8770  | 3.24  | 98.27 |
| scaffold00137 | 88255  | 94314  | 6060  | 1.18  | C_unshiu_00290 | 123419 | 117383 | 6037  | 2.23  | 98.63 |
| scaffold00137 | 94307  | 98208  | 3902  | 0.76  | C_unshiu_01032 | 19676  | 23577  | 3902  | 3.79  | 99.97 |
| scaffold00137 | 98209  | 104666 | 6458  | 1.25  | C_unshiu_00290 | 107535 | 101060 | 6476  | 2.39  | 98.78 |
| scaffold00137 | 104944 | 106769 | 1826  | 0.35  | C_unshiu_02725 | 1      | 1811   | 1811  | 9.36  | 98.58 |
| scaffold00137 | 105261 | 111752 | 6492  | 1.26  | C_unshiu_00290 | 101068 | 94617  | 6452  | 2.38  | 98.43 |
| scaffold00137 | 114256 | 124764 | 10509 | 2.04  | C_unshiu_02725 | 8822   | 19349  | 10528 | 54.41 | 99.38 |
| scaffold00137 | 135932 | 139026 | 3095  | 0.6   | C_unshiu_00290 | 77309  | 74191  | 3119  | 1.15  | 98.43 |
| scaffold00137 | 139847 | 144509 | 4663  | 0.9   | C_unshiu_00290 | 72763  | 68047  | 4717  | 1.74  | 98.13 |
| scaffold00137 | 144496 | 150420 | 5925  | 1.15  | C_unshiu_00290 | 68017  | 62086  | 5932  | 2.19  | 99.29 |
| scaffold00137 | 155752 | 164383 | 8632  | 1.68  | C_unshiu_00290 | 56590  | 47948  | 8643  | 3.19  | 98.47 |
| scaffold00137 | 165417 | 185916 | 20500 | 3.98  | C_unshiu_00290 | 47760  | 27274  | 20487 | 7.57  | 99.09 |
| scaffold00137 | 196109 | 201404 | 5296  | 1.03  | C_unshiu_00290 | 27103  | 21804  | 5300  | 1.96  | 99.19 |
| scaffold00137 | 208026 | 211669 | 3644  | 0.71  | C_unshiu_00290 | 17794  | 14141  | 3654  | 1.35  | 98.96 |
| scaffold00137 | 214700 | 215708 | 1009  | 0.2   | C_unshiu_00290 | 12314  | 11306  | 1009  | 0.37  | 99.9  |
| scaffold00137 | 220876 | 223214 | 2339  | 0.45  | C_unshiu_01225 | 7590   | 9913   | 2324  | 2.8   | 98.04 |
| scaffold00137 | 223230 | 233417 | 10188 | 1.98  | C_unshiu_01225 | 10945  | 21146  | 10202 | 12.29 | 98.18 |
| scaffold00137 | 242317 | 255152 | 12836 | 2.49  | C_unshiu_01225 | 30024  | 42865  | 12842 | 15.47 | 98.2  |
| scaffold00137 | 265453 | 279354 | 13902 | 2.7   | C_unshiu_01225 | 45096  | 59043  | 13948 | 16.8  | 98.11 |
| scaffold00137 | 282002 | 290115 | 8114  | 1.57  | C_unshiu_01225 | 62140  | 70256  | 8117  | 9.78  | 98.57 |
| scaffold00137 | 294035 | 301629 | 7595  | 1.47  | C_unshiu_01225 | 73424  | 81051  | 7628  | 9.19  | 98.23 |
| scaffold00137 | 311186 | 321518 | 10333 | 2.01  | C_unshiu_02827 | 1      | 10282  | 10282 | 59.7  | 98.21 |
| scaffold00137 | 339667 | 341847 | 2181  | 0.42  | C_unshiu_00121 | 47284  | 49477  | 2194  | 0.52  | 98.13 |
| scaffold00137 | 344113 | 357914 | 13802 | 2.68  | C_unshiu_00121 | 53727  | 67566  | 13840 | 3.28  | 98.88 |
| scaffold00137 | 361995 | 364798 | 2804  | 0.54  | C_unshiu_00121 | 71195  | 73998  | 2804  | 0.67  | 99.71 |
| scaffold00137 | 364805 | 384642 | 19838 | 3.85  | C_unshiu_00121 | 75000  | 94802  | 19803 | 4.7   | 98.76 |
| scaffold00137 | 403467 | 407641 | 4175  | 0.81  | C_unshiu_02462 | 1754   | 5929   | 4176  | 16.21 | 99.55 |
| scaffold00137 | 407657 | 411175 | 3519  | 0.68  | C_unshiu_02462 | 6599   | 10127  | 3529  | 13.7  | 98.95 |
| scaffold00137 | 418986 | 420485 | 1500  | 0.29  | C_unshiu_02462 | 14195  | 15693  | 1499  | 5.82  | 99.07 |
| scaffold00137 | 422248 | 430421 | 8174  | 1.59  | C_unshiu_00121 | 137776 | 145964 | 8189  | 1.94  | 98.91 |
| scaffold00137 | 430429 | 434439 | 4011  | 0.78  | C_unshiu_00121 | 147000 | 151010 | 4011  | 0.95  | 100   |
| scaffold00137 | 442065 | 445860 | 3796  | 0.74  | C_unshiu_00121 | 157712 | 161492 | 3781  | 0.9   | 99.26 |
| scaffold00137 | 471686 | 473184 | 1499  | 0.29  | C_unshiu_00121 | 194922 | 196421 | 1500  | 0.36  | 99.47 |
| scaffold00140 | 18     | 30675  | 30658 | 6.06  | C_unshiu_00017 | 447006 | 416393 | 30614 | 3.59  | 99.67 |
| scaffold00140 | 33003  | 91286  | 58284 | 11.52 | C_unshiu_00017 | 413718 | 355410 | 58309 | 6.83  | 99.95 |
| scaffold00140 | 95353  | 138310 | 42958 | 8.49  | C_unshiu_00017 | 356012 | 313049 | 42964 | 5.03  | 99.96 |
| scaffold00140 | 140375 | 202803 | 62429 | 12.34 | C_unshiu_00017 | 309351 | 246956 | 62396 | 7.31  | 99.55 |
| scaffold00140 | 182792 | 225904 | 43113 | 8.53  | C_unshiu_00017 | 266961 | 223911 | 43051 | 5.04  | 99.82 |
| scaffold00140 | 225895 | 229550 | 3656  | 0.72  | C_unshiu_00017 | 215560 | 219212 | 3653  | 0.43  | 99.78 |
| scaffold00140 | 264559 | 267617 | 3059  | 0.6   | C_unshiu_00276 | 35726  | 38784  | 3059  | 1.1   | 99.87 |
| scaffold00140 | 267620 | 272653 | 5034  | 1     | C_unshiu_00276 | 42457  | 47490  | 5034  | 1.81  | 100   |
| scaffold00140 | 272217 | 299895 | 27679 | 5.47  | C_unshiu_00276 | 49622  | 77300  | 27679 | 9.94  | 100   |
| scaffold00140 | 299915 | 335370 | 35456 | 7.01  | C_unshiu_00276 | 77779  | 113234 | 35456 | 12.73 | 100   |
| scaffold00140 | 339586 | 370875 | 31290 | 6.19  | C_unshiu_00276 | 116952 | 148276 | 31325 | 11.25 | 99.87 |
| scaffold00140 | 370860 | 402283 | 31424 | 6.21  | C_unshiu_00276 | 148297 | 179708 | 31412 | 11.28 | 99.95 |
| scaffold00140 | 402296 | 478511 | 76216 | 15.07 | C_unshiu_00276 | 179844 | 256050 | 76207 | 27.37 | 99.88 |
| scaffold00140 | 458544 | 482103 | 23560 | 4.66  | C_unshiu_00276 | 236064 | 259642 | 23579 | 8.47  | 99.89 |
| scaffold00140 | 481983 | 486959 | 4977  | 0.98  | C_unshiu_00262 | 285215 | 280239 | 4977  | 1.74  | 100   |
| scaffold00140 | 490277 | 491801 | 1525  | 0.3   | C_unshiu_00262 | 277712 | 276188 | 1525  | 0.53  | 99.41 |
| scaffold00145 | 6211   | 7359   | 1149  | 0.23  | C_unshiu_00033 | 298661 | 297512 | 1150  | 0.16  | 99.39 |
| scaffold00145 | 38584  | 39928  | 1345  | 0.27  | C_unshiu_01098 | 87822  | 89167  | 1346  | 1.4   | 99.26 |
| scaffold00145 | 58931  | 60879  | 1949  | 0.4   | C_unshiu_02175 | 31398  | 29450  | 1949  | 5.7   | 99.95 |
| scaffold00145 | 61066  | 70254  | 9189  | 1.86  | C_unshiu_02175 | 29016  | 19826  | 9191  | 26.88 | 99.92 |
| scaffold00145 | 74598  | 78212  | 3615  | 0.73  | C_unshiu_02175 | 16187  | 12563  | 3625  | 10.6  | 98.76 |
| scaffold00145 | 81321  | 93628  | 12308 | 2.5   | C_unshiu_02175 | 12306  | 1      | 12306 | 36    | 98.08 |
| scaffold00145 | 95073  | 127928 | 32856 | 6.66  | C_unshiu_00893 | 1      | 32874  | 32874 | 27.92 | 99.07 |
| scaffold00145 | 127945 | 154575 | 26631 | 5.4   | C_unshiu_00893 | 33133  | 59821  | 26689 | 22.67 | 98.52 |
| scaffold00145 | 159402 | 172294 | 12893 | 2.61  | C_unshiu_00893 | 64191  | 77134  | 12944 | 11    | 98.76 |
| scaffold00145 | 182658 | 186639 | 3982  | 0.81  | C_unshiu_00893 | 82359  | 86355  | 3997  | 3.4   | 99.22 |
| scaffold00145 | 217610 | 224244 | 6635  | 1.35  | C_unshiu_00144 | 309280 | 315902 | 6623  | 1.67  | 99.82 |
| scaffold00145 | 227872 | 230743 | 2872  | 0.58  | C_unshiu_00144 | 318498 | 321353 | 2856  | 0.72  | 98.12 |
| scaffold00145 | 231485 | 234741 | 3257  | 0.66  | C_unshiu_00893 | 114464 | 117726 | 3263  | 2.77  | 98.23 |
| scaffold00145 | 242953 | 246529 | 3577  | 0.73  | C_unshiu_00144 | 333622 | 337223 | 3602  | 0.91  | 98.83 |
| scaffold00145 | 278854 | 283864 | 5011  | 1.02  | C_unshiu_00193 | 246248 | 241238 | 5011  | 1.47  | 99.72 |
| scaffold00145 | 296938 | 314439 | 17502 | 3.55  | C_unshiu_00300 | 205932 | 188387 | 17546 | 6.6   | 98.61 |
| scaffold00145 | 352078 | 376218 | 24141 | 4.9   | C_unshiu_00300 | 150551 | 126398 | 24154 | 9.08  | 99.41 |
| scaffold00145 | 376232 | 383534 | 7303  | 1.48  | C_unshiu_00300 | 126056 | 118778 | 7279  | 2.74  | 98.79 |
| scaffold00145 | 391139 | 395711 | 4573  | 0.93  | C_unshiu_00300 | 112387 | 107804 | 4584  | 1.72  | 98.1  |
| scaffold00145 | 395704 | 410214 | 14511 | 2.94  | C_unshiu_00300 | 107610 | 92979  | 14632 | 5.5   | 98.46 |
| scaffold00145 | 424032 | 434632 | 10601 | 2.15  | C_unshiu_00300 | 75173  | 64487  | 10687 | 4.02  | 98.06 |
| scaffold00145 | 439051 | 440372 | 1322  | 0.27  | C_unshiu_00300 | 59637  | 58316  | 1322  | 0.5   | 99.92 |
| scaffold00145 | 441271 | 455018 | 13748 | 2.79  | C_unshiu_01808 | 1      | 13642  | 13642 | 28.29 | 98.4  |
| scaffold00145 | 456143 | 485967 | 29825 | 6.05  | C_unshiu_00300 | 45772  | 15884  | 29889 | 11.24 | 99.53 |
| scaffold00145 | 486237 | 489805 | 3569  | 0.72  | C_unshiu_00300 | 15486  | 11918  | 3569  | 1.34  | 99.58 |
| scaffold00147 | 3965   | 5245   | 1281  | 0.26  | C_unshiu_00776 | 6386   | 7666   | 1281  | 0.97  | 100   |
| scaffold00147 | 5297   | 7413   | 2117  | 0.43  | C_unshiu_00776 | 7956   | 10072  | 2117  | 1.61  | 100   |

|               |        |        |        |       |                |        |        |        |       |       |
|---------------|--------|--------|--------|-------|----------------|--------|--------|--------|-------|-------|
| scaffold00147 | 9238   | 10558  | 1321   | 0.27  | C_unshiu_00776 | 11617  | 12937  | 1321   | 1     | 99.32 |
| scaffold00147 | 17484  | 24092  | 6609   | 1.35  | C_unshiu_02114 | 19604  | 26211  | 6608   | 18.33 | 99.53 |
| scaffold00147 | 25403  | 30516  | 5114   | 1.04  | C_unshiu_01099 | 39112  | 44246  | 5135   | 5.34  | 98.58 |
| scaffold00147 | 33599  | 37828  | 4230   | 0.86  | C_unshiu_01099 | 49633  | 53852  | 4220   | 4.39  | 98.01 |
| scaffold00147 | 40420  | 55673  | 15254  | 3.11  | C_unshiu_01205 | 8162   | 23418  | 15257  | 17.92 | 99.84 |
| scaffold00147 | 54180  | 55673  | 1494   | 0.3   | C_unshiu_01205 | 31344  | 32843  | 1500   | 1.76  | 99.27 |
| scaffold00147 | 60774  | 101659 | 40886  | 8.32  | C_unshiu_01205 | 37524  | 78446  | 40923  | 48.06 | 99.35 |
| scaffold00147 | 108304 | 175814 | 67511  | 13.74 | C_unshiu_00340 | 146729 | 79292  | 67438  | 27.03 | 99.66 |
| scaffold00147 | 185732 | 189515 | 3784   | 0.77  | C_unshiu_00340 | 75575  | 71793  | 3783   | 1.52  | 99.95 |
| scaffold00147 | 189515 | 209278 | 19764  | 4.02  | C_unshiu_00340 | 70257  | 50501  | 19757  | 7.92  | 99.79 |
| scaffold00147 | 209049 | 255114 | 46066  | 9.38  | C_unshiu_00340 | 46069  | 1      | 46069  | 18.46 | 99.72 |
| scaffold00147 | 248984 | 293553 | 44570  | 9.07  | C_unshiu_01502 | 1      | 44600  | 44600  | 70.71 | 99.86 |
| scaffold00147 | 294399 | 307645 | 13247  | 2.7   | C_unshiu_01502 | 45992  | 59145  | 13154  | 20.85 | 98.82 |
| scaffold00147 | 298059 | 315486 | 17428  | 3.55  | C_unshiu_00899 | 117104 | 99730  | 17375  | 14.84 | 98.88 |
| scaffold00147 | 320294 | 343190 | 22897  | 4.66  | C_unshiu_00899 | 94654  | 71766  | 22889  | 19.55 | 99.73 |
| scaffold00147 | 345910 | 473091 | 127182 | 25.89 | C_unshiu_00034 | 196138 | 69008  | 127131 | 18.17 | 99.94 |
| scaffold00147 | 453095 | 491039 | 37945  | 7.72  | C_unshiu_00034 | 88991  | 51145  | 37847  | 5.41  | 99.72 |
| scaffold00148 | 1      | 25616  | 25616  | 5.27  | C_unshiu_00524 | 148857 | 123231 | 25627  | 13.85 | 99.65 |
| scaffold00148 | 28869  | 51515  | 22647  | 4.66  | C_unshiu_00524 | 120333 | 97665  | 22669  | 12.25 | 98.37 |
| scaffold00148 | 70723  | 82408  | 11686  | 2.4   | C_unshiu_00524 | 85425  | 73725  | 11701  | 6.32  | 99.56 |
| scaffold00148 | 82685  | 85655  | 2971   | 0.61  | C_unshiu_00524 | 73368  | 70390  | 2979   | 1.61  | 99.19 |
| scaffold00148 | 85655  | 97356  | 11702  | 2.41  | C_unshiu_00524 | 70239  | 58532  | 11708  | 6.33  | 98.17 |
| scaffold00148 | 104398 | 109457 | 5060   | 1.04  | C_unshiu_00524 | 49314  | 44233  | 5082   | 2.75  | 99    |
| scaffold00148 | 115257 | 116542 | 1286   | 0.26  | C_unshiu_00524 | 42607  | 41320  | 1288   | 0.7   | 98.22 |
| scaffold00148 | 118735 | 121508 | 2774   | 0.57  | C_unshiu_00524 | 40185  | 37413  | 2773   | 1.5   | 99.93 |
| scaffold00148 | 129472 | 139473 | 10002  | 2.06  | C_unshiu_00524 | 31518  | 21535  | 9984   | 5.39  | 99.52 |
| scaffold00148 | 139484 | 144652 | 5169   | 1.06  | C_unshiu_00524 | 20611  | 15432  | 5180   | 2.8   | 99.25 |
| scaffold00148 | 145780 | 147117 | 1338   | 0.28  | C_unshiu_00524 | 13628  | 12291  | 1338   | 0.72  | 99.85 |
| scaffold00148 | 148363 | 158952 | 10590  | 2.18  | C_unshiu_00524 | 10590  | 1      | 10590  | 5.72  | 99.65 |
| scaffold00148 | 174571 | 183307 | 8737   | 1.8   | C_unshiu_00063 | 76129  | 84891  | 8763   | 1.56  | 99.3  |
| scaffold00148 | 202969 | 205625 | 2657   | 0.55  | C_unshiu_00063 | 102626 | 105241 | 2616   | 0.47  | 98.01 |
| scaffold00148 | 206242 | 207747 | 1506   | 0.31  | C_unshiu_00063 | 106317 | 107822 | 1506   | 0.27  | 99.93 |
| scaffold00148 | 208989 | 210762 | 1774   | 0.36  | C_unshiu_00063 | 107997 | 109770 | 1774   | 0.32  | 100   |
| scaffold00148 | 210782 | 215638 | 4857   | 1     | C_unshiu_00983 | 6520   | 11384  | 4865   | 4.49  | 98.58 |
| scaffold00148 | 212800 | 216193 | 3394   | 0.7   | C_unshiu_00063 | 111994 | 115402 | 3409   | 0.61  | 98.42 |
| scaffold00148 | 236561 | 240419 | 3859   | 0.79  | C_unshiu_00983 | 47307  | 51155  | 3849   | 3.55  | 99.61 |
| scaffold00148 | 241148 | 243917 | 2770   | 0.57  | C_unshiu_00983 | 52658  | 55430  | 2773   | 2.56  | 99.64 |
| scaffold00148 | 247240 | 254661 | 7422   | 1.53  | C_unshiu_01104 | 34521  | 41897  | 7377   | 7.7   | 98.8  |
| scaffold00148 | 264692 | 276974 | 12283  | 2.52  | C_unshiu_00559 | 2692   | 14977  | 12286  | 7     | 99.09 |
| scaffold00148 | 277897 | 287232 | 9336   | 1.92  | C_unshiu_00559 | 14004  | 23351  | 9348   | 5.33  | 98.15 |
| scaffold00148 | 287228 | 301071 | 13844  | 2.85  | C_unshiu_00559 | 24544  | 38452  | 13909  | 7.93  | 98.58 |
| scaffold00148 | 322059 | 323315 | 1257   | 0.26  | C_unshiu_00559 | 55912  | 57178  | 1267   | 0.72  | 99.21 |
| scaffold00148 | 377506 | 380023 | 2518   | 0.52  | C_unshiu_00559 | 113558 | 116070 | 2513   | 1.43  | 98.77 |
| scaffold00148 | 380119 | 402615 | 22497  | 4.62  | C_unshiu_00559 | 116220 | 138769 | 22550  | 12.86 | 98.32 |
| scaffold00148 | 403585 | 404951 | 1367   | 0.28  | C_unshiu_00637 | 16062  | 14698  | 1365   | 0.85  | 98.1  |
| scaffold00148 | 405141 | 406308 | 1168   | 0.24  | C_unshiu_00559 | 166878 | 168046 | 1169   | 0.67  | 98.63 |
| scaffold00148 | 406439 | 410511 | 4073   | 0.84  | C_unshiu_02638 | 476    | 4555   | 4080   | 19.26 | 99.31 |
| scaffold00148 | 415986 | 418252 | 2267   | 0.47  | C_unshiu_02638 | 3868   | 6125   | 2258   | 10.66 | 99.16 |
| scaffold00148 | 418534 | 419660 | 1127   | 0.23  | C_unshiu_00559 | 174234 | 175365 | 1132   | 0.65  | 99.12 |
| scaffold00148 | 420378 | 423070 | 2693   | 0.55  | C_unshiu_00559 | 149009 | 151696 | 2688   | 1.53  | 99.78 |
| scaffold00148 | 426777 | 428551 | 1775   | 0.36  | C_unshiu_00559 | 152786 | 154562 | 1777   | 1.01  | 99.83 |
| scaffold00148 | 430449 | 433537 | 3089   | 0.63  | C_unshiu_00559 | 156637 | 159758 | 3122   | 1.78  | 98.59 |
| scaffold00148 | 436129 | 439096 | 2968   | 0.61  | C_unshiu_00559 | 163153 | 166120 | 2968   | 1.69  | 100   |
| scaffold00148 | 439112 | 450312 | 11201  | 2.3   | C_unshiu_00698 | 28296  | 39498  | 11203  | 7.79  | 99.86 |
| scaffold00148 | 451956 | 453252 | 1297   | 0.27  | C_unshiu_00574 | 46080  | 47376  | 1297   | 0.75  | 100   |
| scaffold00148 | 453872 | 468124 | 14253  | 2.93  | C_unshiu_00698 | 42804  | 57007  | 14204  | 9.88  | 99.39 |
| scaffold00148 | 470127 | 483090 | 12964  | 2.66  | C_unshiu_00698 | 63557  | 76542  | 12986  | 9.03  | 99.68 |
| scaffold00149 | 1213   | 11192  | 9980   | 2.06  | C_unshiu_00117 | 1      | 9980   | 9980   | 2.31  | 100   |
| scaffold00149 | 14437  | 15741  | 1305   | 0.27  | C_unshiu_01342 | 57474  | 58778  | 1305   | 1.75  | 99.54 |
| scaffold00149 | 17068  | 30986  | 13919  | 2.87  | C_unshiu_01342 | 60352  | 74293  | 13942  | 18.73 | 99.12 |
| scaffold00149 | 71995  | 91674  | 19680  | 4.06  | C_unshiu_00117 | 76232  | 95970  | 19739  | 4.57  | 98.04 |
| scaffold00149 | 110916 | 123228 | 12313  | 2.54  | C_unshiu_00212 | 160207 | 147899 | 12309  | 3.76  | 99.16 |
| scaffold00149 | 128790 | 132228 | 3439   | 0.71  | C_unshiu_00212 | 142718 | 139278 | 3441   | 1.05  | 99.16 |
| scaffold00149 | 132228 | 139507 | 7280   | 1.5   | C_unshiu_00212 | 139147 | 131867 | 7281   | 2.22  | 99.64 |
| scaffold00149 | 145974 | 173404 | 27431  | 5.65  | C_unshiu_00212 | 130532 | 102959 | 27574  | 8.42  | 98.06 |
| scaffold00149 | 173543 | 175144 | 1602   | 0.33  | C_unshiu_00212 | 102957 | 101357 | 1601   | 0.49  | 98.25 |
| scaffold00149 | 186928 | 189244 | 2317   | 0.48  | C_unshiu_00286 | 238920 | 236602 | 2319   | 0.85  | 99.74 |
| scaffold00149 | 189945 | 193945 | 4001   | 0.82  | C_unshiu_00212 | 88422  | 84421  | 4002   | 1.22  | 99.53 |
| scaffold00149 | 194735 | 200855 | 6121   | 1.26  | C_unshiu_00212 | 83183  | 77079  | 6105   | 1.86  | 98.99 |
| scaffold00149 | 201241 | 203756 | 2516   | 0.52  | C_unshiu_00286 | 229425 | 226907 | 2519   | 0.92  | 99.25 |
| scaffold00149 | 203783 | 205370 | 1588   | 0.33  | C_unshiu_00286 | 224723 | 223148 | 1576   | 0.58  | 98.93 |
| scaffold00149 | 220905 | 224277 | 3373   | 0.7   | C_unshiu_00286 | 211590 | 208217 | 3374   | 1.23  | 99.85 |
| scaffold00149 | 225056 | 227441 | 2386   | 0.49  | C_unshiu_00286 | 206912 | 204519 | 2394   | 0.87  | 99.67 |
| scaffold00149 | 231559 | 236105 | 4547   | 0.94  | C_unshiu_00286 | 196685 | 192126 | 4560   | 1.66  | 99.17 |
| scaffold00149 | 244102 | 283098 | 38997  | 8.04  | C_unshiu_00286 | 181659 | 142391 | 39269  | 14.34 | 98.84 |
| scaffold00149 | 288252 | 297216 | 8965   | 1.85  | C_unshiu_00286 | 135797 | 126819 | 8979   | 3.28  | 99.25 |
| scaffold00149 | 299079 | 310071 | 10993  | 2.27  | C_unshiu_00286 | 125098 | 114043 | 11056  | 4.04  | 98.7  |
| scaffold00149 | 323256 | 324395 | 1140   | 0.23  | C_unshiu_00286 | 105389 | 104250 | 1140   | 0.42  | 100   |
| scaffold00149 | 325585 | 340039 | 14455  | 2.98  | C_unshiu_00286 | 102545 | 88090  | 14456  | 5.28  | 98.83 |

|               |        |        |       |      |                |        |        |       |       |       |
|---------------|--------|--------|-------|------|----------------|--------|--------|-------|-------|-------|
| scaffold00149 | 344632 | 353583 | 8952  | 1.85 | C_unshiu_00286 | 78930  | 69951  | 8980  | 3.28  | 98.36 |
| scaffold00149 | 354929 | 358732 | 3804  | 0.78 | C_unshiu_00286 | 68079  | 64289  | 3791  | 1.38  | 98.64 |
| scaffold00149 | 359945 | 361741 | 1797  | 0.37 | C_unshiu_01657 | 41804  | 43600  | 1797  | 3.27  | 99.05 |
| scaffold00149 | 364023 | 366726 | 2704  | 0.56 | C_unshiu_01657 | 46554  | 49260  | 2707  | 4.93  | 98.67 |
| scaffold00149 | 364023 | 366726 | 2704  | 0.56 | C_unshiu_02869 | 9795   | 7090   | 2706  | 16.47 | 98.45 |
| scaffold00149 | 379817 | 380895 | 1079  | 0.22 | C_unshiu_02869 | 1079   | 1      | 1079  | 6.57  | 100   |
| scaffold00149 | 402482 | 405334 | 2853  | 0.59 | C_unshiu_00082 | 257902 | 255050 | 2853  | 0.6   | 100   |
| scaffold00149 | 404192 | 405335 | 1144  | 0.24 | C_unshiu_00267 | 59023  | 60166  | 1144  | 0.4   | 100   |
| scaffold00149 | 407442 | 408527 | 1086  | 0.22 | C_unshiu_01587 | 22288  | 23373  | 1086  | 1.86  | 100   |
| scaffold00149 | 408528 | 415687 | 7160  | 1.48 | C_unshiu_00383 | 207255 | 200096 | 7160  | 3.15  | 99.92 |
| scaffold00149 | 417363 | 420794 | 3432  | 0.71 | C_unshiu_01656 | 16032  | 19454  | 3423  | 6.22  | 99.53 |
| scaffold00149 | 424043 | 426087 | 2045  | 0.42 | C_unshiu_01656 | 21309  | 23353  | 2045  | 3.72  | 100   |
| scaffold00149 | 426350 | 427958 | 1609  | 0.33 | C_unshiu_01656 | 24101  | 25712  | 1612  | 2.93  | 98.95 |
| scaffold00149 | 426541 | 427958 | 1418  | 0.29 | C_unshiu_02223 | 19572  | 18152  | 1421  | 4.37  | 99.02 |
| scaffold00149 | 430049 | 431387 | 1339  | 0.28 | C_unshiu_00384 | 608    | 1946   | 1339  | 0.59  | 100   |
| scaffold00149 | 430049 | 431387 | 1339  | 0.28 | C_unshiu_02223 | 15801  | 14461  | 1341  | 4.12  | 99.85 |
| scaffold00149 | 445511 | 448333 | 2823  | 0.58 | C_unshiu_00286 | 29085  | 26263  | 2823  | 1.03  | 99.96 |
| scaffold00149 | 448329 | 451990 | 3662  | 0.75 | C_unshiu_00097 | 443060 | 439399 | 3662  | 0.79  | 100   |
| scaffold00149 | 457901 | 459522 | 1622  | 0.33 | C_unshiu_00286 | 19811  | 18194  | 1618  | 0.59  | 99.75 |
| scaffold00149 | 460200 | 462171 | 1972  | 0.41 | C_unshiu_01437 | 54300  | 56248  | 1949  | 2.87  | 98.33 |
| scaffold00149 | 473465 | 476625 | 3161  | 0.65 | C_unshiu_00753 | 118528 | 121688 | 3161  | 2.33  | 100   |
| scaffold00149 | 479471 | 480967 | 1497  | 0.31 | C_unshiu_00582 | 47482  | 48977  | 1496  | 0.87  | 99.33 |
| scaffold00149 | 481528 | 485190 | 3663  | 0.75 | C_unshiu_00582 | 49551  | 53208  | 3658  | 2.14  | 98.61 |
| scaffold00150 | 5592   | 9789   | 4198  | 0.87 | C_unshiu_01930 | 19421  | 15178  | 4244  | 9.73  | 98.23 |
| scaffold00150 | 16393  | 18261  | 1869  | 0.39 | C_unshiu_00661 | 122661 | 120793 | 1869  | 1.22  | 100   |
| scaffold00150 | 20206  | 23929  | 3724  | 0.77 | C_unshiu_01930 | 3721   | 1      | 3721  | 8.53  | 99.57 |
| scaffold00150 | 61960  | 65340  | 3381  | 0.7  | C_unshiu_00620 | 96137  | 99539  | 3403  | 2.09  | 99.06 |
| scaffold00150 | 66226  | 74799  | 8574  | 1.77 | C_unshiu_00620 | 101482 | 110037 | 8556  | 5.25  | 98.7  |
| scaffold00150 | 90264  | 106828 | 16565 | 3.43 | C_unshiu_00620 | 115960 | 132562 | 16603 | 10.18 | 98.86 |
| scaffold00150 | 109459 | 131014 | 21556 | 4.46 | C_unshiu_00620 | 134868 | 156438 | 21571 | 13.22 | 98.2  |
| scaffold00150 | 132054 | 144944 | 12891 | 2.67 | C_unshiu_01366 | 44463  | 31572  | 12892 | 17.59 | 99.83 |
| scaffold00150 | 154437 | 155610 | 1174  | 0.24 | C_unshiu_00140 | 395513 | 396686 | 1174  | 0.29  | 98.89 |
| scaffold00150 | 169239 | 177530 | 8292  | 1.72 | C_unshiu_01366 | 18261  | 9964   | 8298  | 11.32 | 99.35 |
| scaffold00150 | 178530 | 187036 | 8507  | 1.76 | C_unshiu_01366 | 8511   | 1      | 8511  | 11.61 | 98.2  |
| scaffold00150 | 180885 | 189599 | 8715  | 1.8  | C_unshiu_00063 | 71632  | 62905  | 8728  | 1.56  | 99.45 |
| scaffold00150 | 190378 | 193543 | 3166  | 0.66 | C_unshiu_00357 | 235992 | 232834 | 3159  | 1.33  | 99.08 |
| scaffold00150 | 202549 | 208579 | 6031  | 1.25 | C_unshiu_00357 | 213916 | 207867 | 6050  | 2.55  | 98.58 |
| scaffold00150 | 236603 | 238254 | 1652  | 0.34 | C_unshiu_00211 | 31820  | 33480  | 1661  | 0.51  | 98.08 |
| scaffold00150 | 248233 | 269576 | 21344 | 4.42 | C_unshiu_00211 | 45679  | 67037  | 21359 | 6.52  | 98.98 |
| scaffold00150 | 251695 | 270918 | 19224 | 3.98 | C_unshiu_00211 | 49123  | 68368  | 19246 | 5.88  | 99.61 |
| scaffold00150 | 271105 | 275139 | 4035  | 0.84 | C_unshiu_00211 | 68504  | 72536  | 4033  | 1.23  | 99.8  |
| scaffold00150 | 276383 | 293151 | 16769 | 3.47 | C_unshiu_00211 | 74252  | 91088  | 16837 | 5.14  | 98.69 |
| scaffold00150 | 293859 | 295400 | 1542  | 0.32 | C_unshiu_00211 | 91083  | 92623  | 1541  | 0.47  | 98.9  |
| scaffold00150 | 296788 | 302976 | 6189  | 1.28 | C_unshiu_00211 | 105474 | 111679 | 6206  | 1.89  | 98.79 |
| scaffold00150 | 306561 | 313211 | 6651  | 1.38 | C_unshiu_00211 | 114839 | 121494 | 6656  | 2.03  | 99.17 |
| scaffold00150 | 322381 | 324709 | 2329  | 0.48 | C_unshiu_01939 | 28351  | 26024  | 2328  | 5.38  | 99.66 |
| scaffold00150 | 325183 | 336461 | 11279 | 2.33 | C_unshiu_00211 | 130676 | 141941 | 11266 | 3.44  | 98.29 |
| scaffold00150 | 353896 | 355385 | 1490  | 0.31 | C_unshiu_00211 | 148297 | 149804 | 1508  | 0.46  | 98.08 |
| scaffold00150 | 355734 | 356836 | 1103  | 0.23 | C_unshiu_01816 | 439    | 1541   | 1103  | 2.3   | 99.91 |
| scaffold00150 | 357388 | 360103 | 2716  | 0.56 | C_unshiu_01816 | 1696   | 4396   | 2701  | 5.64  | 98.75 |
| scaffold00150 | 357805 | 363091 | 5287  | 1.09 | C_unshiu_00211 | 151699 | 156991 | 5293  | 1.62  | 98.17 |
| scaffold00150 | 363329 | 368644 | 5316  | 1.1  | C_unshiu_01816 | 18941  | 24256  | 5316  | 11.1  | 99.3  |
| scaffold00150 | 372262 | 375699 | 3438  | 0.71 | C_unshiu_00211 | 160797 | 164234 | 3438  | 1.05  | 98.37 |
| scaffold00150 | 387893 | 392792 | 4900  | 1.01 | C_unshiu_00211 | 172140 | 177076 | 4937  | 1.51  | 98.26 |
| scaffold00150 | 396271 | 397589 | 1319  | 0.27 | C_unshiu_00211 | 179342 | 180661 | 1320  | 0.4   | 99.17 |
| scaffold00150 | 399150 | 405503 | 6354  | 1.32 | C_unshiu_00211 | 180591 | 186941 | 6351  | 1.94  | 99.26 |
| scaffold00150 | 407606 | 411677 | 4072  | 0.84 | C_unshiu_00409 | 205407 | 201336 | 4072  | 1.84  | 100   |
| scaffold00150 | 411669 | 424737 | 13069 | 2.71 | C_unshiu_00981 | 107113 | 93962  | 13152 | 12.1  | 98.97 |
| scaffold00150 | 425888 | 432085 | 6198  | 1.28 | C_unshiu_00981 | 93078  | 86856  | 6223  | 5.73  | 98.8  |
| scaffold00150 | 445937 | 447035 | 1099  | 0.23 | C_unshiu_00981 | 76034  | 74936  | 1099  | 1.01  | 100   |
| scaffold00150 | 447575 | 456581 | 9007  | 1.86 | C_unshiu_00981 | 74236  | 65213  | 9024  | 8.3   | 98.55 |
| scaffold00150 | 453004 | 468734 | 15731 | 3.26 | C_unshiu_02278 | 16347  | 615    | 15733 | 51.7  | 99.62 |
| scaffold00150 | 479346 | 481083 | 1738  | 0.36 | C_unshiu_00981 | 58479  | 56732  | 1748  | 1.61  | 98.46 |
| scaffold00154 | 7052   | 13020  | 5969  | 1.26 | C_unshiu_00841 | 5975   | 7      | 5969  | 4.83  | 99.36 |
| scaffold00154 | 37160  | 38243  | 1084  | 0.23 | C_unshiu_00287 | 19827  | 20922  | 1096  | 0.4   | 98.45 |
| scaffold00154 | 38016  | 46024  | 8009  | 1.7  | C_unshiu_00287 | 1      | 7993   | 7993  | 2.93  | 99.17 |
| scaffold00154 | 46652  | 57792  | 11141 | 2.36 | C_unshiu_00287 | 9070   | 20222  | 11153 | 4.08  | 99.62 |
| scaffold00154 | 58164  | 70244  | 12081 | 2.56 | C_unshiu_00287 | 20614  | 32713  | 12100 | 4.43  | 99.48 |
| scaffold00154 | 98858  | 101190 | 2333  | 0.49 | C_unshiu_00890 | 71981  | 74330  | 2350  | 1.99  | 98.09 |
| scaffold00154 | 106694 | 109921 | 3228  | 0.68 | C_unshiu_00890 | 72956  | 76206  | 3251  | 2.75  | 98.09 |
| scaffold00154 | 110851 | 151178 | 40328 | 8.54 | C_unshiu_00890 | 77601  | 117961 | 40361 | 34.12 | 99.5  |
| scaffold00154 | 152202 | 157410 | 5209  | 1.1  | C_unshiu_01968 | 41838  | 36607  | 5232  | 12.51 | 99.27 |
| scaffold00154 | 157203 | 164642 | 7440  | 1.58 | C_unshiu_01968 | 36611  | 29188  | 7424  | 17.74 | 99.54 |
| scaffold00154 | 167607 | 168737 | 1131  | 0.24 | C_unshiu_01968 | 25127  | 23985  | 1143  | 2.73  | 98.95 |
| scaffold00154 | 175850 | 190793 | 14944 | 3.17 | C_unshiu_01968 | 15823  | 963    | 14861 | 35.52 | 98.1  |
| scaffold00154 | 213803 | 224445 | 10643 | 2.25 | C_unshiu_01699 | 48599  | 37946  | 10654 | 20.27 | 99.01 |
| scaffold00154 | 232541 | 247225 | 14685 | 3.11 | C_unshiu_01699 | 36152  | 21442  | 14711 | 27.99 | 98.23 |
| scaffold00154 | 247314 | 252400 | 5087  | 1.08 | C_unshiu_01699 | 21059  | 15973  | 5087  | 9.68  | 100   |
| scaffold00154 | 253563 | 262804 | 9242  | 1.96 | C_unshiu_01699 | 14302  | 5007   | 9296  | 17.69 | 99.09 |

|               |        |        |        |       |                |        |        |        |       |       |
|---------------|--------|--------|--------|-------|----------------|--------|--------|--------|-------|-------|
| scaffold00154 | 263357 | 267486 | 4130   | 0.87  | C_unshiu_01699 | 4130   | 1      | 4130   | 7.86  | 100   |
| scaffold00154 | 310508 | 335084 | 24577  | 5.21  | C_unshiu_00101 | 59221  | 83788  | 24568  | 5.39  | 98.09 |
| scaffold00154 | 336928 | 360327 | 23400  | 4.96  | C_unshiu_00101 | 84405  | 107865 | 23461  | 5.15  | 98.13 |
| scaffold00154 | 361005 | 366145 | 5141   | 1.09  | C_unshiu_00101 | 108839 | 114002 | 5164   | 1.13  | 98.47 |
| scaffold00154 | 368133 | 377842 | 9710   | 2.06  | C_unshiu_00101 | 115521 | 125288 | 9768   | 2.14  | 98.6  |
| scaffold00154 | 377836 | 382813 | 4978   | 1.05  | C_unshiu_00101 | 125499 | 130490 | 4992   | 1.1   | 98.54 |
| scaffold00154 | 404728 | 405897 | 1170   | 0.25  | C_unshiu_00101 | 147530 | 148699 | 1170   | 0.26  | 100   |
| scaffold00154 | 415454 | 425801 | 10348  | 2.19  | C_unshiu_00101 | 157660 | 168063 | 10404  | 2.28  | 98.13 |
| scaffold00154 | 429742 | 431976 | 2235   | 0.47  | C_unshiu_01087 | 94130  | 91881  | 2250   | 2.31  | 98.67 |
| scaffold00154 | 432088 | 433665 | 1578   | 0.33  | C_unshiu_01087 | 91717  | 90141  | 1577   | 1.62  | 99.62 |
| scaffold00154 | 434406 | 435815 | 1410   | 0.3   | C_unshiu_01087 | 89104  | 87693  | 1412   | 1.45  | 99.5  |
| scaffold00154 | 440553 | 449406 | 8854   | 1.88  | C_unshiu_00070 | 1      | 8865   | 8865   | 1.7   | 98.4  |
| scaffold00154 | 450818 | 456844 | 6027   | 1.28  | C_unshiu_00070 | 10993  | 16993  | 6001   | 1.15  | 98.79 |
| scaffold00154 | 454923 | 458314 | 3392   | 0.72  | C_unshiu_02665 | 1      | 3385   | 3385   | 16.44 | 98.73 |
| scaffold00154 | 468607 | 472084 | 3478   | 0.74  | C_unshiu_02665 | 14903  | 18375  | 3473   | 16.87 | 99.83 |
| scaffold00158 | 4940   | 6449   | 1510   | 0.33  | C_unshiu_00165 | 66543  | 65035  | 1509   | 0.41  | 99.8  |
| scaffold00158 | 6402   | 57426  | 51025  | 11.07 | C_unshiu_00165 | 52854  | 1816   | 51039  | 13.8  | 99.87 |
| scaffold00158 | 56333  | 59966  | 3634   | 0.79  | C_unshiu_00364 | 155592 | 151959 | 3634   | 1.55  | 100   |
| scaffold00158 | 68691  | 139177 | 70487  | 15.3  | C_unshiu_00364 | 143146 | 72659  | 70488  | 30.06 | 99.99 |
| scaffold00158 | 138169 | 170058 | 31890  | 6.92  | C_unshiu_00364 | 72655  | 40775  | 31881  | 13.6  | 99.66 |
| scaffold00158 | 150059 | 170416 | 20358  | 4.42  | C_unshiu_00364 | 60755  | 40417  | 20339  | 8.67  | 99.88 |
| scaffold00158 | 174979 | 209997 | 35019  | 7.6   | C_unshiu_00364 | 35488  | 479    | 35010  | 14.93 | 99.97 |
| scaffold00158 | 190002 | 210475 | 20474  | 4.44  | C_unshiu_00364 | 20465  | 1      | 20465  | 8.73  | 99.96 |
| scaffold00158 | 225583 | 388251 | 162669 | 35.3  | C_unshiu_00270 | 84161  | 246859 | 162699 | 57.9  | 99.96 |
| scaffold00158 | 386922 | 458030 | 71109  | 15.43 | C_unshiu_00228 | 308013 | 236905 | 71109  | 22.96 | 99.95 |
| scaffold00160 | 2560   | 64295  | 61736  | 13.49 | C_unshiu_00258 | 283587 | 221838 | 61750  | 21.39 | 99.97 |
| scaffold00160 | 64295  | 112227 | 47933  | 10.47 | C_unshiu_00258 | 221735 | 173801 | 47935  | 16.61 | 99.99 |
| scaffold00160 | 114088 | 117759 | 3672   | 0.8   | C_unshiu_00515 | 19861  | 16190  | 3672   | 1.97  | 100   |
| scaffold00160 | 118812 | 196562 | 77751  | 16.99 | C_unshiu_00258 | 167069 | 89320  | 77750  | 26.93 | 99.98 |
| scaffold00160 | 200523 | 201527 | 1005   | 0.22  | C_unshiu_00258 | 85828  | 84824  | 1005   | 0.35  | 100   |
| scaffold00160 | 201528 | 216493 | 14966  | 3.27  | C_unshiu_00258 | 80628  | 65662  | 14967  | 5.18  | 99.99 |
| scaffold00160 | 222863 | 224153 | 1291   | 0.28  | C_unshiu_00258 | 57478  | 56188  | 1291   | 0.45  | 100   |
| scaffold00160 | 225222 | 227539 | 2318   | 0.51  | C_unshiu_00258 | 54944  | 52637  | 2308   | 0.8   | 98.5  |
| scaffold00160 | 226988 | 228870 | 1883   | 0.41  | C_unshiu_00210 | 1      | 1883   | 1883   | 0.57  | 99.36 |
| scaffold00160 | 228871 | 233353 | 4483   | 0.98  | C_unshiu_01423 | 43754  | 39272  | 4483   | 6.51  | 100   |
| scaffold00160 | 233349 | 308147 | 74799  | 16.35 | C_unshiu_00210 | 5654   | 80456  | 74803  | 22.84 | 99.97 |
| scaffold00160 | 308996 | 331774 | 22779  | 4.98  | C_unshiu_00210 | 80660  | 103438 | 22779  | 6.95  | 99.99 |
| scaffold00160 | 332597 | 394252 | 61656  | 13.47 | C_unshiu_00210 | 103808 | 165433 | 61626  | 18.82 | 99.72 |
| scaffold00160 | 397272 | 402525 | 5254   | 1.15  | C_unshiu_01438 | 31429  | 26175  | 5255   | 7.76  | 99.9  |
| scaffold00160 | 403892 | 408056 | 4165   | 0.91  | C_unshiu_01438 | 25083  | 20923  | 4161   | 6.15  | 99.86 |
| scaffold00160 | 408329 | 410393 | 2065   | 0.45  | C_unshiu_00418 | 78435  | 80499  | 2065   | 0.94  | 99.81 |
| scaffold00160 | 411212 | 412589 | 1378   | 0.3   | C_unshiu_00418 | 81085  | 82463  | 1379   | 0.63  | 99.35 |
| scaffold00160 | 413202 | 414911 | 1710   | 0.37  | C_unshiu_00418 | 83094  | 84803  | 1710   | 0.78  | 100   |
| scaffold00160 | 416433 | 418439 | 2007   | 0.44  | C_unshiu_01572 | 26141  | 24135  | 2007   | 3.4   | 100   |
| scaffold00160 | 419446 | 424674 | 5229   | 1.14  | C_unshiu_02721 | 6262   | 1033   | 5230   | 26.99 | 99.89 |
| scaffold00160 | 424699 | 432052 | 7354   | 1.61  | C_unshiu_01064 | 43466  | 36107  | 7360   | 7.44  | 99.52 |
| scaffold00160 | 438056 | 440144 | 2089   | 0.46  | C_unshiu_01572 | 2882   | 787    | 2096   | 3.55  | 98.1  |
| scaffold00160 | 444284 | 457595 | 13312  | 2.91  | C_unshiu_00423 | 159266 | 145996 | 13271  | 6.1   | 99.16 |
| scaffold00161 | 3701   | 14543  | 10843  | 2.37  | C_unshiu_00229 | 290228 | 279380 | 10849  | 3.5   | 99.23 |
| scaffold00161 | 21052  | 22547  | 1496   | 0.33  | C_unshiu_01347 | 20833  | 19338  | 1496   | 2.02  | 100   |
| scaffold00161 | 22539  | 24923  | 2385   | 0.52  | C_unshiu_00229 | 270967 | 268582 | 2386   | 0.77  | 99.29 |
| scaffold00161 | 24964  | 27255  | 2292   | 0.5   | C_unshiu_00229 | 268344 | 266051 | 2294   | 0.74  | 99.52 |
| scaffold00161 | 29654  | 32042  | 2389   | 0.52  | C_unshiu_03097 | 1      | 2388   | 2388   | 25.03 | 99.41 |
| scaffold00161 | 34565  | 36251  | 1687   | 0.37  | C_unshiu_00229 | 259042 | 257358 | 1685   | 0.54  | 99.64 |
| scaffold00161 | 38515  | 41003  | 2489   | 0.54  | C_unshiu_00229 | 255100 | 252619 | 2482   | 0.8   | 98.96 |
| scaffold00161 | 41497  | 52001  | 10505  | 2.3   | C_unshiu_00229 | 251680 | 241184 | 10497  | 3.39  | 99.54 |
| scaffold00161 | 54059  | 55375  | 1317   | 0.29  | C_unshiu_00229 | 238753 | 237437 | 1317   | 0.43  | 100   |
| scaffold00161 | 55451  | 66260  | 10810  | 2.36  | C_unshiu_00229 | 237028 | 226216 | 10813  | 3.49  | 98.93 |
| scaffold00161 | 90548  | 139113 | 48566  | 10.62 | C_unshiu_00214 | 8988   | 57602  | 48615  | 14.96 | 99.6  |
| scaffold00161 | 139224 | 141677 | 2454   | 0.54  | C_unshiu_00214 | 57895  | 60355  | 2461   | 0.76  | 99.59 |
| scaffold00161 | 141847 | 144289 | 2443   | 0.53  | C_unshiu_00214 | 60815  | 63261  | 2447   | 0.75  | 99.67 |
| scaffold00161 | 144291 | 189308 | 45018  | 9.84  | C_unshiu_00214 | 63701  | 108750 | 45050  | 13.86 | 99.78 |
| scaffold00161 | 190131 | 195408 | 5278   | 1.15  | C_unshiu_00214 | 109695 | 114946 | 5252   | 1.62  | 98.11 |
| scaffold00161 | 195423 | 209118 | 13696  | 2.99  | C_unshiu_00214 | 115501 | 129216 | 13716  | 4.22  | 99.74 |
| scaffold00161 | 209110 | 224017 | 14908  | 3.26  | C_unshiu_00214 | 129662 | 144578 | 14917  | 4.59  | 98.53 |
| scaffold00161 | 224009 | 257870 | 33862  | 7.4   | C_unshiu_00214 | 145227 | 179127 | 33901  | 10.43 | 99.18 |
| scaffold00161 | 257973 | 307859 | 49887  | 10.9  | C_unshiu_00214 | 179280 | 229437 | 50158  | 15.43 | 98.64 |
| scaffold00161 | 309456 | 313345 | 3890   | 0.85  | C_unshiu_00214 | 229832 | 233723 | 3892   | 1.2   | 98.46 |
| scaffold00161 | 313360 | 323464 | 10105  | 2.21  | C_unshiu_00214 | 234237 | 244335 | 10099  | 3.11  | 99.83 |
| scaffold00161 | 324131 | 353977 | 29847  | 6.52  | C_unshiu_00214 | 245453 | 275286 | 29834  | 9.18  | 99.19 |
| scaffold00161 | 353976 | 356526 | 2551   | 0.56  | C_unshiu_01143 | 27571  | 25021  | 2551   | 2.78  | 100   |
| scaffold00161 | 356527 | 362159 | 5633   | 1.23  | C_unshiu_00214 | 276223 | 281838 | 5616   | 1.73  | 98.48 |
| scaffold00161 | 362178 | 371545 | 9368   | 2.05  | C_unshiu_00214 | 282908 | 292294 | 9387   | 2.89  | 99.67 |
| scaffold00161 | 375905 | 377692 | 1788   | 0.39  | C_unshiu_00214 | 294816 | 296600 | 1785   | 0.55  | 99.55 |
| scaffold00161 | 399520 | 403445 | 3926   | 0.86  | C_unshiu_01847 | 1      | 3930   | 3930   | 8.43  | 99.34 |
| scaffold00161 | 403136 | 408247 | 5112   | 1.12  | C_unshiu_01847 | 4393   | 9502   | 5110   | 10.96 | 99.43 |
| scaffold00161 | 410917 | 419887 | 8971   | 1.96  | C_unshiu_01847 | 10550  | 19522  | 8973   | 19.25 | 99.18 |
| scaffold00161 | 419898 | 428736 | 8839   | 1.93  | C_unshiu_01847 | 20728  | 29572  | 8845   | 18.97 | 99.67 |
| scaffold00161 | 428745 | 431586 | 2842   | 0.62  | C_unshiu_01847 | 31900  | 34741  | 2842   | 6.1   | 100   |

|               |        |        |       |       |                |         |         |       |       |       |
|---------------|--------|--------|-------|-------|----------------|---------|---------|-------|-------|-------|
| scaffold00161 | 449173 | 452828 | 3656  | 0.8   | C_unshiu_00214 | 314811  | 311156  | 3656  | 1.12  | 99.12 |
| scaffold00161 | 453586 | 455021 | 1436  | 0.31  | C_unshiu_00214 | 309733  | 308299  | 1435  | 0.44  | 99.58 |
| scaffold00162 | 15090  | 17124  | 2035  | 0.44  | C_unshiu_00078 | 64499   | 66527   | 2029  | 0.41  | 98.43 |
| scaffold00162 | 32136  | 73848  | 41713 | 9.12  | C_unshiu_00078 | 67538   | 109238  | 41701 | 8.36  | 99.54 |
| scaffold00162 | 80430  | 137520 | 57091 | 12.48 | C_unshiu_00078 | 121664  | 178798  | 57135 | 11.45 | 99.66 |
| scaffold00162 | 137560 | 142050 | 4491  | 0.98  | C_unshiu_00078 | 193207  | 197697  | 4491  | 0.9   | 99.87 |
| scaffold00162 | 180118 | 187830 | 7713  | 1.69  | C_unshiu_02041 | 29886   | 37598   | 7713  | 19.73 | 99.95 |
| scaffold00162 | 187839 | 207187 | 19349 | 4.23  | C_unshiu_00078 | 232344  | 251681  | 19338 | 3.88  | 99.64 |
| scaffold00162 | 208403 | 213101 | 4699  | 1.03  | C_unshiu_00078 | 253431  | 258129  | 4699  | 0.94  | 99.98 |
| scaffold00162 | 213105 | 216375 | 3271  | 0.72  | C_unshiu_01334 | 60926   | 64194   | 3269  | 4.36  | 99.21 |
| scaffold00162 | 217721 | 227135 | 9415  | 2.06  | C_unshiu_00078 | 262114  | 271538  | 9425  | 1.89  | 99.47 |
| scaffold00162 | 227311 | 249532 | 22222 | 4.86  | C_unshiu_00078 | 271339  | 293595  | 22257 | 4.46  | 99.37 |
| scaffold00162 | 250295 | 280061 | 29767 | 6.51  | C_unshiu_00078 | 293794  | 323466  | 29673 | 5.95  | 99.16 |
| scaffold00162 | 280089 | 284885 | 4797  | 1.05  | C_unshiu_00078 | 323440  | 328237  | 4798  | 0.96  | 99.69 |
| scaffold00162 | 284883 | 357635 | 72753 | 15.91 | C_unshiu_00078 | 328168  | 401009  | 72842 | 14.6  | 99.51 |
| scaffold00162 | 359735 | 361079 | 1345  | 0.29  | C_unshiu_00078 | 403607  | 404952  | 1346  | 0.27  | 99.55 |
| scaffold00162 | 361071 | 380102 | 19032 | 4.16  | C_unshiu_00078 | 405501  | 424567  | 19067 | 3.82  | 99.47 |
| scaffold00162 | 379963 | 383202 | 3240  | 0.71  | C_unshiu_00078 | 424567  | 427780  | 3214  | 0.64  | 98.31 |
| scaffold00162 | 383508 | 388982 | 5475  | 1.2   | C_unshiu_00078 | 427783  | 433255  | 5473  | 1.1   | 99.29 |
| scaffold00162 | 388976 | 391487 | 2512  | 0.55  | C_unshiu_00514 | 24495   | 21984   | 2512  | 1.34  | 100   |
| scaffold00162 | 391871 | 393207 | 1337  | 0.29  | C_unshiu_01197 | 32237   | 33575   | 1339  | 1.56  | 98.88 |
| scaffold00162 | 399401 | 401195 | 1795  | 0.39  | C_unshiu_00489 | 182984  | 181190  | 1795  | 0.92  | 100   |
| scaffold00162 | 408485 | 409993 | 1509  | 0.33  | C_unshiu_00155 | 341461  | 342971  | 1511  | 0.4   | 98.54 |
| scaffold00162 | 413483 | 415209 | 1727  | 0.38  | C_unshiu_00078 | 464570  | 466288  | 1719  | 0.34  | 98.44 |
| scaffold00162 | 413496 | 415232 | 1737  | 0.38  | C_unshiu_00078 | 464583  | 466311  | 1729  | 0.35  | 98.45 |
| scaffold00162 | 417782 | 423166 | 5385  | 1.18  | C_unshiu_00155 | 350952  | 356342  | 5391  | 1.41  | 98.87 |
| scaffold00162 | 435638 | 437995 | 2358  | 0.52  | C_unshiu_00155 | 368301  | 370658  | 2358  | 0.62  | 99.96 |
| scaffold00162 | 440806 | 444159 | 3354  | 0.73  | C_unshiu_00155 | 372009  | 375364  | 3356  | 0.88  | 99.46 |
| scaffold00162 | 444960 | 449375 | 4416  | 0.97  | C_unshiu_00155 | 376768  | 381144  | 4377  | 1.15  | 98.42 |
| scaffold00162 | 449440 | 451141 | 1702  | 0.37  | C_unshiu_02812 | 9133    | 10834   | 1702  | 9.65  | 100   |
| scaffold00162 | 452062 | 453501 | 1440  | 0.31  | C_unshiu_00916 | 74330   | 72891   | 1440  | 1.25  | 100   |
| scaffold00162 | 453506 | 454916 | 1411  | 0.31  | C_unshiu_02812 | 12818   | 14225   | 1408  | 7.98  | 99.79 |
| scaffold00162 | 456054 | 457340 | 1287  | 0.28  | C_unshiu_02812 | 14971   | 16249   | 1279  | 7.25  | 98.14 |
| scaffold00164 | 1      | 60622  | 60622 | 13.36 | C_unshiu_00201 | 335075  | 274445  | 60631 | 18.07 | 99.99 |
| scaffold00164 | 40621  | 98933  | 58313 | 12.85 | C_unshiu_00201 | 294452  | 236123  | 58330 | 17.38 | 99.94 |
| scaffold00164 | 99615  | 112337 | 12723 | 2.8   | C_unshiu_00201 | 235252  | 222543  | 12710 | 3.79  | 99.89 |
| scaffold00164 | 112777 | 151342 | 38566 | 8.5   | C_unshiu_00201 | 221802  | 183239  | 38564 | 11.49 | 99.99 |
| scaffold00164 | 161585 | 217649 | 56065 | 12.35 | C_unshiu_00368 | 226451  | 170369  | 56083 | 24.04 | 99.28 |
| scaffold00164 | 242482 | 249963 | 7482  | 1.65  | C_unshiu_00242 | 281990  | 274509  | 7482  | 2.49  | 99.76 |
| scaffold00164 | 249960 | 253047 | 3088  | 0.68  | C_unshiu_00242 | 283205  | 286268  | 3064  | 1.02  | 98.77 |
| scaffold00164 | 253048 | 274869 | 21822 | 4.81  | C_unshiu_00242 | 274508  | 252685  | 21824 | 7.26  | 99.93 |
| scaffold00164 | 283579 | 304853 | 21275 | 4.69  | C_unshiu_00242 | 251004  | 229746  | 21259 | 7.07  | 99.86 |
| scaffold00164 | 305099 | 310693 | 5595  | 1.23  | C_unshiu_00242 | 229473  | 223879  | 5595  | 1.86  | 100   |
| scaffold00164 | 312395 | 340472 | 28078 | 6.19  | C_unshiu_00242 | 223889  | 195812  | 28078 | 9.34  | 100   |
| scaffold00164 | 340501 | 439849 | 99349 | 21.89 | C_unshiu_00242 | 195442  | 96223   | 99220 | 33.01 | 99.8  |
| scaffold00164 | 440323 | 451951 | 11629 | 2.56  | C_unshiu_00242 | 95146   | 83528   | 11619 | 3.87  | 99.48 |
| scaffold00166 | 2809   | 3820   | 1012  | 0.23  | C_unshiu_00051 | 162607  | 161596  | 1012  | 0.17  | 100   |
| scaffold00166 | 5722   | 7781   | 2060  | 0.46  | C_unshiu_00358 | 60599   | 62658   | 2060  | 0.87  | 99.71 |
| scaffold00166 | 19626  | 20840  | 1215  | 0.27  | C_unshiu_00358 | 73248   | 74453   | 1206  | 0.51  | 98.6  |
| scaffold00166 | 20829  | 27535  | 6707  | 1.49  | C_unshiu_00358 | 76487   | 83180   | 6694  | 2.82  | 99.17 |
| scaffold00166 | 40888  | 43713  | 2826  | 0.63  | C_unshiu_01614 | 1776    | 4596    | 2821  | 4.96  | 99.36 |
| scaffold00166 | 44884  | 51280  | 6397  | 1.42  | C_unshiu_00358 | 102027  | 108433  | 6407  | 2.7   | 99.72 |
| scaffold00166 | 51298  | 61820  | 10523 | 2.34  | C_unshiu_00358 | 108828  | 119331  | 10504 | 4.43  | 99.64 |
| scaffold00166 | 66518  | 69310  | 2793  | 0.62  | C_unshiu_01659 | 53639   | 50842   | 2798  | 5.11  | 98.79 |
| scaffold00166 | 69300  | 72219  | 2920  | 0.65  | C_unshiu_01659 | 44932   | 42012   | 2921  | 5.33  | 98.36 |
| scaffold00166 | 76842  | 78824  | 1983  | 0.44  | C_unshiu_00539 | 20522   | 18540   | 1983  | 1.09  | 100   |
| scaffold00166 | 112611 | 121239 | 8629  | 1.92  | C_unshiu_01333 | 34412   | 43040   | 8629  | 11.5  | 99.64 |
| scaffold00166 | 144337 | 148176 | 3840  | 0.85  | C_unshiu_00994 | 1398    | 5237    | 3840  | 3.59  | 100   |
| scaffold00166 | 150601 | 160243 | 9643  | 2.15  | C_unshiu_01333 | 60392   | 70021   | 9630  | 12.84 | 98.73 |
| scaffold00166 | 160244 | 162186 | 1943  | 0.43  | C_unshiu_01333 | 70401   | 72343   | 1943  | 2.59  | 100   |
| scaffold00166 | 162210 | 163479 | 1270  | 0.28  | C_unshiu_00915 | 16937   | 18206   | 1270  | 1.1   | 100   |
| scaffold00166 | 165081 | 178517 | 13437 | 2.99  | C_unshiu_00074 | 290388  | 303851  | 13464 | 2.63  | 99.6  |
| scaffold00166 | 181925 | 183242 | 1318  | 0.29  | C_unshiu_02131 | 34263   | 35577   | 1315  | 3.7   | 98.56 |
| scaffold00166 | 197323 | 202650 | 5328  | 1.19  | C_unshiu_00871 | 5097    | 10364   | 5268  | 4.38  | 98.69 |
| scaffold00166 | 203147 | 209752 | 6606  | 1.47  | C_unshiu_00871 | 10878   | 17479   | 6602  | 5.49  | 99.88 |
| scaffold00166 | 210346 | 223413 | 13068 | 2.91  | C_unshiu_00871 | 18345   | 31421   | 13077 | 10.88 | 99.85 |
| scaffold00166 | 223631 | 229067 | 5437  | 1.21  | C_unshiu_00573 | 63670   | 58234   | 5437  | 3.15  | 100   |
| scaffold00166 | 229062 | 252447 | 23386 | 5.2   | C_unshiu_00871 | 36655   | 60040   | 23386 | 19.46 | 100   |
| scaffold00166 | 284963 | 286690 | 1728  | 0.38  | C_unshiu_00223 | 297699  | 299426  | 1728  | 0.55  | 100   |
| scaffold00166 | 330168 | 346656 | 16489 | 3.67  | C_unshiu_01296 | 14      | 16456   | 16443 | 21.18 | 99.58 |
| scaffold00166 | 350879 | 352044 | 1166  | 0.26  | C_unshiu_01296 | 19980   | 21137   | 1158  | 1.49  | 99.31 |
| scaffold00166 | 352045 | 356173 | 4129  | 0.92  | C_unshiu_00410 | 20702   | 16574   | 4129  | 1.87  | 100   |
| scaffold00166 | 366867 | 368866 | 2000  | 0.45  | C_unshiu_01109 | 75465   | 73468   | 1998  | 2.1   | 98    |
| scaffold00166 | 383180 | 407019 | 23840 | 5.31  | C_unshiu_00104 | 51148   | 74941   | 23794 | 5.28  | 99.44 |
| scaffold00166 | 407615 | 416400 | 8786  | 1.96  | C_unshiu_00104 | 75808   | 84588   | 8781  | 1.95  | 99.72 |
| scaffold00166 | 416398 | 437601 | 21204 | 4.72  | C_unshiu_00174 | 291199  | 312355  | 21157 | 5.81  | 99.57 |
| scaffold00166 | 438072 | 441896 | 3825  | 0.85  | C_unshiu_00174 | 313230  | 317054  | 3825  | 1.05  | 100   |
| scaffold00166 | 447995 | 449387 | 1393  | 0.31  | C_unshiu_00174 | 323581  | 324973  | 1393  | 0.38  | 99.78 |
| scaffold00170 | 3486   | 36233  | 32748 | 7.41  | C_unshiu_00003 | 1307474 | 1274814 | 32661 | 2.49  | 99.09 |

|               |        |        |        |       |                |         |         |        |       |       |
|---------------|--------|--------|--------|-------|----------------|---------|---------|--------|-------|-------|
| scaffold00170 | 40774  | 53712  | 12939  | 2.93  | C_unshiu_00003 | 1267132 | 1254187 | 12946  | 0.99  | 99.31 |
| scaffold00170 | 59308  | 74106  | 14799  | 3.35  | C_unshiu_00474 | 87506   | 102308  | 14803  | 7.37  | 99.94 |
| scaffold00170 | 75491  | 121130 | 45640  | 10.32 | C_unshiu_00474 | 103935  | 149574  | 45640  | 22.73 | 99.99 |
| scaffold00170 | 121059 | 130876 | 9818   | 2.22  | C_unshiu_00474 | 149538  | 159355  | 9818   | 4.89  | 100   |
| scaffold00170 | 136807 | 144316 | 7510   | 1.7   | C_unshiu_00474 | 165043  | 172552  | 7510   | 3.74  | 100   |
| scaffold00170 | 149271 | 172445 | 23175  | 5.24  | C_unshiu_00474 | 176946  | 200120  | 23175  | 11.54 | 100   |
| scaffold00170 | 174663 | 179945 | 5283   | 1.19  | C_unshiu_00886 | 1       | 5236    | 5236   | 4.41  | 98.43 |
| scaffold00170 | 179813 | 191984 | 12172  | 2.75  | C_unshiu_00886 | 5259    | 17308   | 12050  | 10.15 | 98.87 |
| scaffold00170 | 192278 | 282274 | 89997  | 20.35 | C_unshiu_00886 | 18517   | 108043  | 89527  | 75.39 | 99.35 |
| scaffold00170 | 288162 | 289430 | 1269   | 0.29  | C_unshiu_01092 | 14453   | 15721   | 1269   | 1.31  | 100   |
| scaffold00170 | 290285 | 294397 | 4113   | 0.93  | C_unshiu_00243 | 143687  | 139575  | 4113   | 1.37  | 100   |
| scaffold00170 | 294390 | 296443 | 2054   | 0.46  | C_unshiu_00321 | 3591    | 5646    | 2056   | 0.8   | 99.76 |
| scaffold00170 | 301311 | 314495 | 13185  | 2.98  | C_unshiu_00321 | 10098   | 23285   | 13188  | 5.16  | 99.49 |
| scaffold00170 | 314875 | 346457 | 31583  | 7.14  | C_unshiu_00321 | 23465   | 55035   | 31571  | 12.35 | 99.94 |
| scaffold00170 | 349421 | 392180 | 42760  | 9.67  | C_unshiu_00321 | 57330   | 100068  | 42739  | 16.71 | 99.9  |
| scaffold00170 | 372181 | 434119 | 61939  | 14.01 | C_unshiu_00321 | 80091   | 141987  | 61897  | 24.21 | 99.91 |
| scaffold00170 | 435453 | 436754 | 1302   | 0.29  | C_unshiu_00321 | 143835  | 145137  | 1303   | 0.51  | 99.92 |
| scaffold00175 | 1561   | 3931   | 2371   | 0.54  | C_unshiu_00620 | 45531   | 47921   | 2391   | 1.47  | 98.41 |
| scaffold00175 | 1561   | 3931   | 2371   | 0.54  | C_unshiu_00717 | 54142   | 51753   | 2390   | 1.69  | 98.66 |
| scaffold00175 | 9833   | 12467  | 2635   | 0.61  | C_unshiu_00717 | 44227   | 41593   | 2635   | 1.86  | 99.96 |
| scaffold00175 | 17532  | 28476  | 10945  | 2.52  | C_unshiu_00717 | 36918   | 25972   | 10947  | 7.73  | 99.95 |
| scaffold00175 | 28468  | 29542  | 1075   | 0.25  | C_unshiu_00084 | 106334  | 105260  | 1075   | 0.23  | 100   |
| scaffold00175 | 29543  | 38715  | 9173   | 2.11  | C_unshiu_00717 | 24538   | 15399   | 9140   | 6.46  | 99.38 |
| scaffold00175 | 37631  | 41634  | 4004   | 0.92  | C_unshiu_01012 | 54858   | 58861   | 4004   | 3.82  | 99.53 |
| scaffold00175 | 49488  | 56645  | 7158   | 1.65  | C_unshiu_01012 | 64757   | 71873   | 7117   | 6.8   | 98.42 |
| scaffold00175 | 57470  | 58574  | 1105   | 0.25  | C_unshiu_01012 | 73012   | 74116   | 1105   | 1.06  | 99    |
| scaffold00175 | 58859  | 60974  | 2116   | 0.49  | C_unshiu_01012 | 75135   | 77244   | 2110   | 2.01  | 98.91 |
| scaffold00175 | 83145  | 89367  | 6223   | 1.43  | C_unshiu_00379 | 174803  | 181025  | 6223   | 2.7   | 99.97 |
| scaffold00175 | 96748  | 99491  | 2744   | 0.63  | C_unshiu_01012 | 101976  | 104719  | 2744   | 2.62  | 99.64 |
| scaffold00175 | 104052 | 105819 | 1768   | 0.41  | C_unshiu_00717 | 137338  | 139108  | 1771   | 1.25  | 99.27 |
| scaffold00175 | 140323 | 143787 | 3465   | 0.8   | C_unshiu_02272 | 20824   | 17361   | 3464   | 11.27 | 99.94 |
| scaffold00175 | 143789 | 148602 | 4814   | 1.11  | C_unshiu_02272 | 17057   | 12247   | 4811   | 15.65 | 99.65 |
| scaffold00175 | 148993 | 157350 | 8358   | 1.92  | C_unshiu_00717 | 109844  | 101493  | 8352   | 5.9   | 99.27 |
| scaffold00175 | 158558 | 160019 | 1462   | 0.34  | C_unshiu_00717 | 97961   | 96500   | 1462   | 1.03  | 98.91 |
| scaffold00175 | 167179 | 173282 | 6104   | 1.4   | C_unshiu_00717 | 90690   | 84581   | 6110   | 4.32  | 98.68 |
| scaffold00175 | 180547 | 186950 | 6404   | 1.47  | C_unshiu_00717 | 79745   | 73334   | 6412   | 4.53  | 99.39 |
| scaffold00175 | 187704 | 199197 | 11494  | 2.64  | C_unshiu_00717 | 71717   | 60189   | 11529  | 8.15  | 98.29 |
| scaffold00175 | 207380 | 228568 | 21189  | 4.87  | C_unshiu_00175 | 102809  | 81628   | 21182  | 5.84  | 98.82 |
| scaffold00175 | 229306 | 232663 | 3358   | 0.77  | C_unshiu_00175 | 81116   | 77759   | 3358   | 0.93  | 99.97 |
| scaffold00175 | 232658 | 237430 | 4773   | 1.1   | C_unshiu_00213 | 17481   | 22253   | 4773   | 1.46  | 100   |
| scaffold00175 | 242094 | 272428 | 30335  | 6.97  | C_unshiu_00213 | 27149   | 57397   | 30249  | 9.28  | 99.57 |
| scaffold00175 | 252442 | 341583 | 89142  | 20.49 | C_unshiu_00213 | 37439   | 126549  | 89111  | 27.32 | 99.97 |
| scaffold00175 | 341606 | 369317 | 27712  | 6.37  | C_unshiu_00213 | 127365  | 155082  | 27718  | 8.5   | 99.85 |
| scaffold00175 | 373989 | 428050 | 54062  | 12.43 | C_unshiu_00213 | 164770  | 218858  | 54089  | 16.59 | 99.86 |
| scaffold00175 | 408096 | 435075 | 26980  | 6.2   | C_unshiu_00213 | 198865  | 225907  | 27043  | 8.29  | 99.71 |
| scaffold00176 | 960    | 2262   | 1303   | 0.3   | C_unshiu_00058 | 142221  | 143506  | 1286   | 0.22  | 98.7  |
| scaffold00176 | 3206   | 14795  | 11590  | 2.69  | C_unshiu_00058 | 144993  | 156582  | 11590  | 1.96  | 99.93 |
| scaffold00176 | 16120  | 17885  | 1766   | 0.41  | C_unshiu_00058 | 157397  | 159162  | 1766   | 0.3   | 98.92 |
| scaffold00176 | 17886  | 23053  | 5168   | 1.2   | C_unshiu_00885 | 25809   | 30977   | 5169   | 4.35  | 99.98 |
| scaffold00176 | 23861  | 29984  | 6124   | 1.42  | C_unshiu_00058 | 164739  | 170870  | 6132   | 1.04  | 99.01 |
| scaffold00176 | 38494  | 54994  | 16501  | 3.83  | C_unshiu_00058 | 180457  | 196929  | 16473  | 2.79  | 98.01 |
| scaffold00176 | 55863  | 68061  | 12199  | 2.83  | C_unshiu_00058 | 198027  | 210197  | 12171  | 2.06  | 98.27 |
| scaffold00176 | 68199  | 69732  | 1534   | 0.36  | C_unshiu_00058 | 210270  | 211808  | 1539   | 0.26  | 98.9  |
| scaffold00176 | 72981  | 74862  | 1882   | 0.44  | C_unshiu_00058 | 217683  | 219563  | 1881   | 0.32  | 98.73 |
| scaffold00176 | 74609  | 80754  | 6146   | 1.43  | C_unshiu_00058 | 219434  | 225620  | 6187   | 1.05  | 98.21 |
| scaffold00176 | 81010  | 109842 | 28833  | 6.69  | C_unshiu_00058 | 225716  | 254725  | 29010  | 4.91  | 98.03 |
| scaffold00176 | 109840 | 126328 | 16489  | 3.82  | C_unshiu_00058 | 255474  | 271973  | 16500  | 2.79  | 98.74 |
| scaffold00176 | 126325 | 128698 | 2374   | 0.55  | C_unshiu_00233 | 85371   | 87744   | 2374   | 0.78  | 100   |
| scaffold00176 | 129863 | 133193 | 3331   | 0.77  | C_unshiu_00058 | 274543  | 277873  | 3331   | 0.56  | 100   |
| scaffold00176 | 133825 | 136444 | 2620   | 0.61  | C_unshiu_00290 | 115068  | 117686  | 2619   | 0.97  | 98.32 |
| scaffold00176 | 135095 | 167960 | 32866  | 7.62  | C_unshiu_02212 | 1       | 32847   | 32847  | 100   | 98.9  |
| scaffold00176 | 183903 | 196282 | 12380  | 2.87  | C_unshiu_00227 | 283306  | 270945  | 12362  | 3.99  | 98.73 |
| scaffold00176 | 192702 | 196282 | 3581   | 0.83  | C_unshiu_00227 | 255836  | 252243  | 3594   | 1.16  | 98.64 |
| scaffold00176 | 197771 | 204295 | 6525   | 1.51  | C_unshiu_00227 | 251868  | 245402  | 6467   | 2.09  | 98.28 |
| scaffold00176 | 205919 | 208536 | 2618   | 0.61  | C_unshiu_00227 | 243616  | 241001  | 2616   | 0.84  | 99.62 |
| scaffold00176 | 210950 | 242722 | 31773  | 7.37  | C_unshiu_00227 | 238339  | 206475  | 31865  | 10.29 | 98.43 |
| scaffold00176 | 242724 | 247946 | 5223   | 1.21  | C_unshiu_00227 | 206384  | 201132  | 5253   | 1.7   | 98.78 |
| scaffold00176 | 250534 | 254794 | 4261   | 0.99  | C_unshiu_03146 | 813     | 5073    | 4261   | 83.99 | 100   |
| scaffold00176 | 313004 | 316185 | 3182   | 0.74  | C_unshiu_00227 | 145549  | 142349  | 3201   | 1.03  | 99.09 |
| scaffold00176 | 346147 | 349149 | 3003   | 0.7   | C_unshiu_00227 | 95021   | 92019   | 3003   | 0.97  | 99.14 |
| scaffold00176 | 349305 | 358028 | 8724   | 2.02  | C_unshiu_00227 | 91422   | 82672   | 8751   | 2.83  | 99.13 |
| scaffold00176 | 358527 | 382845 | 24319  | 5.64  | C_unshiu_00227 | 82149   | 57841   | 24309  | 7.85  | 98.55 |
| scaffold00176 | 376895 | 384996 | 8102   | 1.88  | C_unshiu_02158 | 24826   | 32928   | 8103   | 23.38 | 98.32 |
| scaffold00176 | 385013 | 386434 | 1422   | 0.33  | C_unshiu_02158 | 33200   | 34621   | 1422   | 4.1   | 100   |
| scaffold00176 | 395448 | 405393 | 9946   | 2.31  | C_unshiu_00227 | 51868   | 41929   | 9940   | 3.21  | 99.7  |
| scaffold00176 | 407310 | 413832 | 6523   | 1.51  | C_unshiu_01165 | 1132    | 7676    | 6545   | 7.32  | 98.6  |
| scaffold00176 | 413856 | 419020 | 5165   | 1.2   | C_unshiu_00227 | 34312   | 29164   | 5149   | 1.66  | 99.17 |
| scaffold00176 | 420381 | 422137 | 1757   | 0.41  | C_unshiu_00227 | 27277   | 25530   | 1748   | 0.56  | 98.69 |
| scaffold00177 | 511    | 161087 | 160577 | 37.25 | C_unshiu_00470 | 184004  | 23433   | 160572 | 79.88 | 99.91 |

|               |        |        |        |       |                |        |        |        |       |       |
|---------------|--------|--------|--------|-------|----------------|--------|--------|--------|-------|-------|
| scaffold00177 | 161199 | 162534 | 1336   | 0.31  | C_unshiu_00470 | 22930  | 21595  | 1336   | 0.66  | 100   |
| scaffold00177 | 162534 | 164543 | 2010   | 0.47  | C_unshiu_01312 | 24473  | 22464  | 2010   | 2.64  | 100   |
| scaffold00177 | 164542 | 175910 | 11369  | 2.64  | C_unshiu_00864 | 12294  | 23656  | 11363  | 9.4   | 99.88 |
| scaffold00177 | 176717 | 177848 | 1132   | 0.26  | C_unshiu_00864 | 24704  | 25835  | 1132   | 0.94  | 100   |
| scaffold00177 | 178773 | 193561 | 14789  | 3.43  | C_unshiu_00864 | 27847  | 42635  | 14789  | 12.24 | 99.83 |
| scaffold00177 | 193581 | 202760 | 9180   | 2.13  | C_unshiu_00864 | 43821  | 52960  | 9140   | 7.56  | 98.74 |
| scaffold00177 | 203696 | 231780 | 28085  | 6.51  | C_unshiu_00864 | 54380  | 82484  | 28105  | 23.25 | 99.49 |
| scaffold00177 | 226519 | 234160 | 7642   | 1.77  | C_unshiu_00864 | 92445  | 84810  | 7636   | 6.32  | 99.71 |
| scaffold00177 | 231785 | 263117 | 31333  | 7.27  | C_unshiu_00393 | 74895  | 43618  | 31278  | 13.93 | 99.07 |
| scaffold00177 | 282256 | 304512 | 22257  | 5.16  | C_unshiu_00393 | 25050  | 2775   | 22276  | 9.92  | 99.07 |
| scaffold00177 | 304607 | 307067 | 2461   | 0.57  | C_unshiu_00393 | 2653   | 197    | 2457   | 1.09  | 99.84 |
| scaffold00177 | 308378 | 309784 | 1407   | 0.33  | C_unshiu_02293 | 9278   | 7872   | 1407   | 4.68  | 100   |
| scaffold00177 | 330864 | 337455 | 6592   | 1.53  | C_unshiu_01672 | 51030  | 44440  | 6591   | 12.21 | 98.36 |
| scaffold00177 | 357625 | 370809 | 13185  | 3.06  | C_unshiu_00138 | 386240 | 399424 | 13185  | 3.26  | 100   |
| scaffold00177 | 372381 | 376580 | 4200   | 0.97  | C_unshiu_00138 | 399674 | 403889 | 4216   | 1.04  | 99.55 |
| scaffold00177 | 379584 | 401335 | 21752  | 5.05  | C_unshiu_00576 | 171617 | 149874 | 21744  | 12.62 | 99.96 |
| scaffold00177 | 420382 | 421420 | 1039   | 0.24  | C_unshiu_00410 | 74305  | 73267  | 1039   | 0.47  | 100   |
| scaffold00178 | 1      | 1835   | 1835   | 0.43  | C_unshiu_00183 | 124478 | 122644 | 1835   | 0.52  | 99.89 |
| scaffold00178 | 4964   | 27756  | 22793  | 5.33  | C_unshiu_00029 | 426681 | 449452 | 22772  | 3.18  | 99.64 |
| scaffold00178 | 32410  | 40116  | 7707   | 1.8   | C_unshiu_00029 | 450270 | 457976 | 7707   | 1.07  | 100   |
| scaffold00178 | 44360  | 50339  | 5980   | 1.4   | C_unshiu_00029 | 416570 | 422515 | 5946   | 0.83  | 99.33 |
| scaffold00178 | 50339  | 53168  | 2830   | 0.66  | C_unshiu_00029 | 422673 | 425490 | 2818   | 0.39  | 99.51 |
| scaffold00178 | 58601  | 61489  | 2889   | 0.68  | C_unshiu_00029 | 467100 | 469988 | 2889   | 0.4   | 100   |
| scaffold00178 | 61484  | 63087  | 1604   | 0.38  | C_unshiu_02430 | 15507  | 13904  | 1604   | 6     | 100   |
| scaffold00178 | 68187  | 69915  | 1729   | 0.4   | C_unshiu_00029 | 476171 | 477895 | 1725   | 0.24  | 99.54 |
| scaffold00178 | 74472  | 84554  | 10083  | 2.36  | C_unshiu_00754 | 4953   | 15053  | 10101  | 7.45  | 99.79 |
| scaffold00178 | 96930  | 113584 | 16655  | 3.9   | C_unshiu_00754 | 26271  | 42925  | 16655  | 12.28 | 99.98 |
| scaffold00178 | 113572 | 140968 | 27397  | 6.41  | C_unshiu_01034 | 57307  | 29948  | 27360  | 26.63 | 99.2  |
| scaffold00178 | 142176 | 151573 | 9398   | 2.2   | C_unshiu_01034 | 28072  | 18687  | 9386   | 9.13  | 99.34 |
| scaffold00178 | 151827 | 164294 | 12468  | 2.92  | C_unshiu_01034 | 18393  | 5925   | 12469  | 12.14 | 99.79 |
| scaffold00178 | 166974 | 168168 | 1195   | 0.28  | C_unshiu_01034 | 1195   | 1      | 1195   | 1.16  | 100   |
| scaffold00178 | 168674 | 170140 | 1467   | 0.34  | C_unshiu_00213 | 7214   | 5746   | 1469   | 0.45  | 98.31 |
| scaffold00178 | 176594 | 184883 | 8290   | 1.94  | C_unshiu_00213 | 9173   | 17479  | 8307   | 2.55  | 99.8  |
| scaffold00178 | 188948 | 192894 | 3947   | 0.92  | C_unshiu_00175 | 76446  | 72536  | 3911   | 1.08  | 98.1  |
| scaffold00178 | 205787 | 207029 | 1243   | 0.29  | C_unshiu_00175 | 61442  | 60199  | 1244   | 0.34  | 99.2  |
| scaffold00178 | 210094 | 220392 | 10299  | 2.41  | C_unshiu_00175 | 60268  | 49910  | 10359  | 2.86  | 98.52 |
| scaffold00178 | 240239 | 243355 | 3117   | 0.73  | C_unshiu_00335 | 1      | 3115   | 3115   | 1.24  | 98.78 |
| scaffold00178 | 243850 | 247427 | 3578   | 0.84  | C_unshiu_01168 | 50300  | 53877  | 3578   | 4.04  | 100   |
| scaffold00178 | 249104 | 261284 | 12181  | 2.85  | C_unshiu_00271 | 137048 | 124812 | 12237  | 4.37  | 99.08 |
| scaffold00178 | 261389 | 263897 | 2509   | 0.59  | C_unshiu_00271 | 124624 | 122110 | 2515   | 0.9   | 98.93 |
| scaffold00178 | 263893 | 270183 | 6291   | 1.47  | C_unshiu_00271 | 121968 | 115649 | 6320   | 2.25  | 98.89 |
| scaffold00178 | 280434 | 285769 | 5336   | 1.25  | C_unshiu_00271 | 105674 | 100323 | 5352   | 1.91  | 99.4  |
| scaffold00178 | 287169 | 343340 | 56172  | 13.15 | C_unshiu_00271 | 98742  | 42509  | 56234  | 20.06 | 99.59 |
| scaffold00178 | 339538 | 391018 | 51481  | 12.05 | C_unshiu_00211 | 327498 | 275963 | 51536  | 15.74 | 99.19 |
| scaffold00178 | 392018 | 398080 | 6063   | 1.42  | C_unshiu_00211 | 275960 | 269889 | 6072   | 1.85  | 98.57 |
| scaffold00178 | 398768 | 407987 | 9220   | 2.16  | C_unshiu_00211 | 268921 | 259720 | 9202   | 2.81  | 98.46 |
| scaffold00178 | 409057 | 414348 | 5292   | 1.24  | C_unshiu_00211 | 256336 | 251052 | 5285   | 1.61  | 98.12 |
| scaffold00178 | 419434 | 423741 | 4308   | 1.01  | C_unshiu_02872 | 11733  | 15986  | 4254   | 25.95 | 98.63 |
| scaffold00188 | 5163   | 6600   | 1438   | 0.35  | C_unshiu_01686 | 47846  | 49283  | 1438   | 2.7   | 100   |
| scaffold00188 | 7188   | 10761  | 3574   | 0.86  | C_unshiu_01686 | 49688  | 53239  | 3552   | 6.67  | 99.16 |
| scaffold00188 | 13613  | 129130 | 115518 | 27.82 | C_unshiu_00011 | 784800 | 669278 | 115523 | 11.95 | 99.97 |
| scaffold00188 | 130037 | 132935 | 2899   | 0.7   | C_unshiu_00011 | 667711 | 664827 | 2885   | 0.3   | 98.73 |
| scaffold00188 | 141381 | 155058 | 13678  | 3.29  | C_unshiu_00170 | 359897 | 346273 | 13625  | 3.71  | 99.31 |
| scaffold00188 | 156369 | 187261 | 30893  | 7.44  | C_unshiu_00170 | 343085 | 312193 | 30893  | 8.41  | 99.98 |
| scaffold00188 | 187255 | 188394 | 1140   | 0.27  | C_unshiu_00227 | 25385  | 24246  | 1140   | 0.37  | 100   |
| scaffold00188 | 188395 | 192393 | 3999   | 0.96  | C_unshiu_00170 | 309443 | 305445 | 3999   | 1.09  | 100   |
| scaffold00188 | 195306 | 221484 | 26179  | 6.3   | C_unshiu_00170 | 305111 | 278933 | 26179  | 7.12  | 99.92 |
| scaffold00188 | 225379 | 241472 | 16094  | 3.88  | C_unshiu_00170 | 276113 | 260019 | 16095  | 4.38  | 99.78 |
| scaffold00188 | 286855 | 289557 | 2703   | 0.65  | C_unshiu_01028 | 85740  | 88448  | 2709   | 2.63  | 99.74 |
| scaffold00188 | 289558 | 299781 | 10224  | 2.46  | C_unshiu_01028 | 90979  | 101113 | 10135  | 9.83  | 99.02 |
| scaffold00188 | 307637 | 314810 | 7174   | 1.73  | C_unshiu_00942 | 5710   | 12884  | 7175   | 6.4   | 99.99 |
| scaffold00188 | 316079 | 412571 | 96493  | 23.23 | C_unshiu_00942 | 14993  | 111430 | 96438  | 85.99 | 99.91 |
| scaffold00192 | 344    | 2526   | 2183   | 0.54  | C_unshiu_00453 | 192184 | 190008 | 2177   | 1.05  | 99.36 |
| scaffold00192 | 2518   | 4534   | 2017   | 0.5   | C_unshiu_02526 | 16785  | 14769  | 2017   | 8.43  | 100   |
| scaffold00192 | 7655   | 16122  | 8468   | 2.1   | C_unshiu_00453 | 185167 | 176695 | 8473   | 4.09  | 99.4  |
| scaffold00192 | 22600  | 24496  | 1897   | 0.47  | C_unshiu_00453 | 136503 | 134589 | 1915   | 0.92  | 98.96 |
| scaffold00192 | 38751  | 43379  | 4629   | 1.15  | C_unshiu_00453 | 125937 | 121307 | 4631   | 2.24  | 99.94 |
| scaffold00192 | 53369  | 101504 | 48136  | 11.93 | C_unshiu_00453 | 110638 | 62482  | 48157  | 23.26 | 99.68 |
| scaffold00192 | 106433 | 119024 | 12592  | 3.12  | C_unshiu_00453 | 59022  | 46431  | 12592  | 6.08  | 99.83 |
| scaffold00192 | 119145 | 138829 | 19685  | 4.88  | C_unshiu_00453 | 45501  | 25767  | 19735  | 9.53  | 99.04 |
| scaffold00192 | 138890 | 155289 | 16400  | 4.06  | C_unshiu_00453 | 24832  | 8455   | 16378  | 7.91  | 99.57 |
| scaffold00192 | 166830 | 176769 | 9940   | 2.46  | C_unshiu_00226 | 45330  | 35395  | 9936   | 3.19  | 99.76 |
| scaffold00192 | 178932 | 207027 | 28096  | 6.96  | C_unshiu_00226 | 33293  | 5209   | 28085  | 9.02  | 99.55 |
| scaffold00192 | 209713 | 211779 | 2067   | 0.51  | C_unshiu_00226 | 3911   | 1845   | 2067   | 0.66  | 99.95 |
| scaffold00192 | 212190 | 213553 | 1364   | 0.34  | C_unshiu_00467 | 94089  | 92729  | 1361   | 0.67  | 99.56 |
| scaffold00192 | 215015 | 229124 | 14110  | 3.5   | C_unshiu_00467 | 90693  | 76566  | 14128  | 6.97  | 99.77 |
| scaffold00192 | 231860 | 236722 | 4863   | 1.2   | C_unshiu_00467 | 75098  | 70235  | 4864   | 2.4   | 99.88 |
| scaffold00192 | 239799 | 245609 | 5811   | 1.44  | C_unshiu_00467 | 69084  | 63273  | 5812   | 2.87  | 99.86 |
| scaffold00192 | 250757 | 256046 | 5290   | 1.31  | C_unshiu_00467 | 58480  | 53189  | 5292   | 2.61  | 99.85 |

|               |        |        |       |       |                |        |        |       |       |       |
|---------------|--------|--------|-------|-------|----------------|--------|--------|-------|-------|-------|
| scaffold00192 | 256691 | 262603 | 5913  | 1.47  | C_unshiu_00467 | 52296  | 46383  | 5914  | 2.92  | 99.93 |
| scaffold00192 | 263478 | 274798 | 11321 | 2.81  | C_unshiu_00467 | 45095  | 33771  | 11325 | 5.59  | 99.84 |
| scaffold00192 | 275446 | 276982 | 1537  | 0.38  | C_unshiu_00467 | 32887  | 31350  | 1538  | 0.76  | 99.87 |
| scaffold00192 | 277850 | 289157 | 11308 | 2.8   | C_unshiu_00467 | 30126  | 18802  | 11325 | 5.59  | 99.76 |
| scaffold00192 | 313627 | 315352 | 1726  | 0.43  | C_unshiu_00467 | 6292   | 4563   | 1730  | 0.85  | 99.36 |
| scaffold00192 | 315362 | 317218 | 1857  | 0.46  | C_unshiu_01583 | 1639   | 3493   | 1855  | 3.17  | 99.57 |
| scaffold00192 | 318632 | 336458 | 17827 | 4.42  | C_unshiu_01583 | 5267   | 23034  | 17768 | 30.36 | 99.47 |
| scaffold00192 | 336500 | 354316 | 17817 | 4.41  | C_unshiu_01583 | 23242  | 41041  | 17800 | 30.41 | 99.64 |
| scaffold00192 | 355466 | 371319 | 15854 | 3.93  | C_unshiu_01583 | 42660  | 58530  | 15871 | 27.12 | 99.75 |
| scaffold00192 | 374718 | 399245 | 24528 | 6.08  | C_unshiu_01024 | 28857  | 53363  | 24507 | 23.7  | 99.69 |
| scaffold00192 | 399685 | 401122 | 1438  | 0.36  | C_unshiu_01024 | 54212  | 55650  | 1439  | 1.39  | 99.93 |
| scaffold00192 | 401134 | 402453 | 1320  | 0.33  | C_unshiu_01024 | 56231  | 57549  | 1319  | 1.28  | 99.47 |
| scaffold00198 | 1      | 64436  | 64436 | 16.58 | C_unshiu_00910 | 69120  | 4698   | 64423 | 55.55 | 99.97 |
| scaffold00198 | 44447  | 66702  | 22256 | 5.73  | C_unshiu_00910 | 24675  | 2432   | 22244 | 19.18 | 99.95 |
| scaffold00198 | 83983  | 85394  | 1412  | 0.36  | C_unshiu_00667 | 140398 | 138986 | 1413  | 0.92  | 99.93 |
| scaffold00198 | 85956  | 113760 | 27805 | 7.15  | C_unshiu_00667 | 138967 | 111159 | 27809 | 18.2  | 99.96 |
| scaffold00198 | 93771  | 180894 | 87124 | 22.41 | C_unshiu_00667 | 131152 | 44023  | 87130 | 57.02 | 99.98 |
| scaffold00198 | 182216 | 224186 | 41971 | 10.8  | C_unshiu_00667 | 41885  | 1      | 41885 | 27.41 | 99.77 |
| scaffold00198 | 219453 | 228105 | 8653  | 2.23  | C_unshiu_00462 | 131012 | 122341 | 8672  | 4.26  | 99.77 |
| scaffold00198 | 227999 | 254787 | 26789 | 6.89  | C_unshiu_00462 | 122412 | 95617  | 26796 | 13.16 | 99.97 |
| scaffold00198 | 234780 | 268523 | 33744 | 8.68  | C_unshiu_00462 | 115631 | 81880  | 33752 | 16.57 | 99.97 |
| scaffold00198 | 271146 | 349746 | 78601 | 20.22 | C_unshiu_00462 | 78637  | 1      | 78637 | 38.61 | 99.83 |
| scaffold00198 | 360772 | 384774 | 24003 | 6.17  | C_unshiu_00750 | 18574  | 42557  | 23984 | 17.58 | 99.76 |
| scaffold00198 | 384309 | 385340 | 1032  | 0.27  | C_unshiu_00750 | 43577  | 42546  | 1032  | 0.76  | 99.9  |
| scaffold00199 | 25776  | 29059  | 3284  | 0.85  | C_unshiu_02132 | 29993  | 26742  | 3252  | 9.15  | 98.87 |
| scaffold00199 | 29313  | 42902  | 13590 | 3.5   | C_unshiu_02132 | 26223  | 12653  | 13571 | 38.19 | 99.36 |
| scaffold00199 | 39868  | 53118  | 13251 | 3.41  | C_unshiu_00124 | 405938 | 419176 | 13239 | 3.16  | 98.49 |
| scaffold00199 | 50310  | 60740  | 10431 | 2.69  | C_unshiu_02132 | 12411  | 1942   | 10470 | 29.46 | 98.75 |
| scaffold00199 | 63255  | 92502  | 29248 | 7.53  | C_unshiu_01634 | 6143   | 35439  | 29297 | 52.64 | 98.51 |
| scaffold00199 | 116019 | 120555 | 4537  | 1.17  | C_unshiu_00608 | 165121 | 160578 | 4544  | 2.75  | 98.35 |
| scaffold00199 | 121192 | 123126 | 1935  | 0.5   | C_unshiu_00608 | 159318 | 157386 | 1933  | 1.17  | 98.81 |
| scaffold00199 | 123117 | 128703 | 5587  | 1.44  | C_unshiu_00608 | 156770 | 151174 | 5597  | 3.39  | 98.03 |
| scaffold00199 | 131751 | 149142 | 17392 | 4.48  | C_unshiu_00608 | 149425 | 131921 | 17505 | 10.6  | 98.29 |
| scaffold00199 | 154548 | 159817 | 5270  | 1.36  | C_unshiu_00608 | 120983 | 115711 | 5273  | 3.19  | 98.62 |
| scaffold00199 | 159817 | 174396 | 14580 | 3.75  | C_unshiu_00608 | 115337 | 100737 | 14601 | 8.84  | 98.59 |
| scaffold00199 | 178765 | 182896 | 4132  | 1.06  | C_unshiu_00608 | 100486 | 96350  | 4137  | 2.51  | 99.47 |
| scaffold00199 | 184053 | 206248 | 22196 | 5.71  | C_unshiu_00608 | 94709  | 72440  | 22270 | 13.49 | 98.37 |
| scaffold00199 | 221304 | 224170 | 2867  | 0.74  | C_unshiu_00608 | 57759  | 54901  | 2859  | 1.73  | 98.29 |
| scaffold00199 | 228990 | 240401 | 11412 | 2.94  | C_unshiu_00608 | 51133  | 39685  | 11449 | 6.93  | 98.14 |
| scaffold00199 | 246240 | 268377 | 22138 | 5.7   | C_unshiu_00608 | 35509  | 13376  | 22134 | 13.4  | 99.44 |
| scaffold00199 | 274476 | 278133 | 3658  | 0.94  | C_unshiu_01766 | 42771  | 39112  | 3660  | 7.35  | 98.5  |
| scaffold00199 | 278155 | 281484 | 3330  | 0.86  | C_unshiu_01766 | 38418  | 35087  | 3332  | 6.69  | 99.7  |
| scaffold00199 | 290635 | 299779 | 9145  | 2.35  | C_unshiu_00202 | 87146  | 77981  | 9166  | 2.74  | 99.3  |
| scaffold00199 | 299892 | 307507 | 7616  | 1.96  | C_unshiu_01766 | 17207  | 9572   | 7636  | 15.34 | 99.41 |
| scaffold00199 | 308092 | 309925 | 1834  | 0.47  | C_unshiu_01766 | 7276   | 5445   | 1832  | 3.68  | 99.84 |
| scaffold00199 | 317926 | 321035 | 3110  | 0.8   | C_unshiu_01018 | 3107   | 6217   | 3111  | 2.99  | 99.36 |
| scaffold00199 | 321273 | 326358 | 5086  | 1.31  | C_unshiu_01018 | 6702   | 11785  | 5084  | 4.88  | 98.03 |
| scaffold00199 | 325089 | 336122 | 11034 | 2.84  | C_unshiu_00202 | 56751  | 45737  | 11015 | 3.29  | 99.34 |
| scaffold00199 | 336766 | 339640 | 2875  | 0.74  | C_unshiu_00202 | 38851  | 35977  | 2875  | 0.86  | 99.9  |
| scaffold00199 | 338400 | 343434 | 5035  | 1.3   | C_unshiu_00202 | 46001  | 40957  | 5045  | 1.51  | 98.83 |
| scaffold00199 | 343451 | 376859 | 33409 | 8.6   | C_unshiu_00202 | 33352  | 1      | 33352 | 9.95  | 99.79 |
| scaffold00199 | 386018 | 387511 | 1494  | 0.38  | C_unshiu_02722 | 17175  | 15682  | 1494  | 7.71  | 99.93 |
| scaffold00205 | 5855   | 19592  | 13738 | 3.62  | C_unshiu_00354 | 1724   | 15431  | 13708 | 5.74  | 99.72 |
| scaffold00205 | 25405  | 60677  | 35273 | 9.29  | C_unshiu_00354 | 24111  | 59388  | 35278 | 14.76 | 99.97 |
| scaffold00205 | 60816  | 79081  | 18266 | 4.81  | C_unshiu_00354 | 59481  | 77628  | 18148 | 7.6   | 99.14 |
| scaffold00205 | 79417  | 91281  | 11865 | 3.12  | C_unshiu_00354 | 77863  | 89730  | 11868 | 4.97  | 99.82 |
| scaffold00205 | 89651  | 117709 | 28059 | 7.39  | C_unshiu_00159 | 108321 | 136415 | 28095 | 7.52  | 99.72 |
| scaffold00205 | 117351 | 169263 | 51913 | 13.67 | C_unshiu_00159 | 136120 | 188032 | 51913 | 13.9  | 99.94 |
| scaffold00205 | 170428 | 172067 | 1640  | 0.43  | C_unshiu_00159 | 188499 | 190138 | 1640  | 0.44  | 100   |
| scaffold00205 | 172220 | 199116 | 26897 | 7.08  | C_unshiu_00159 | 190609 | 217505 | 26897 | 7.2   | 99.98 |
| scaffold00205 | 204083 | 231283 | 27201 | 7.16  | C_unshiu_00159 | 222013 | 249217 | 27205 | 7.28  | 99.98 |
| scaffold00205 | 231310 | 234721 | 3412  | 0.9   | C_unshiu_00159 | 249849 | 253260 | 3412  | 0.91  | 100   |
| scaffold00205 | 235617 | 237913 | 2297  | 0.6   | C_unshiu_00159 | 252687 | 254983 | 2297  | 0.61  | 99.22 |
| scaffold00205 | 236005 | 237913 | 1909  | 0.5   | C_unshiu_01351 | 73926  | 72015  | 1912  | 2.59  | 99.53 |
| scaffold00205 | 241825 | 245210 | 3386  | 0.89  | C_unshiu_01351 | 69204  | 65817  | 3388  | 4.58  | 98.74 |
| scaffold00205 | 245511 | 279011 | 33501 | 8.82  | C_unshiu_01351 | 64040  | 30545  | 33496 | 45.31 | 99.92 |
| scaffold00205 | 290294 | 299221 | 8928  | 2.35  | C_unshiu_00127 | 114669 | 105725 | 8945  | 2.16  | 99.25 |
| scaffold00205 | 298026 | 362574 | 64549 | 17    | C_unshiu_00127 | 100506 | 35939  | 64568 | 15.58 | 99.91 |
| scaffold00205 | 364385 | 372850 | 8466  | 2.23  | C_unshiu_00127 | 34597  | 26130  | 8468  | 2.04  | 99.89 |
| scaffold00205 | 373947 | 378124 | 4178  | 1.1   | C_unshiu_00127 | 24551  | 20392  | 4160  | 1     | 99.07 |
| scaffold00206 | 35752  | 42219  | 6468  | 1.71  | C_unshiu_00026 | 146159 | 139692 | 6468  | 0.86  | 99.98 |
| scaffold00206 | 58852  | 65277  | 6426  | 1.7   | C_unshiu_00026 | 128550 | 122120 | 6431  | 0.85  | 99.11 |
| scaffold00206 | 65301  | 67173  | 1873  | 0.49  | C_unshiu_00026 | 122136 | 120268 | 1869  | 0.25  | 98.24 |
| scaffold00206 | 84735  | 108723 | 23989 | 6.34  | C_unshiu_00026 | 101850 | 77777  | 24074 | 3.19  | 98.23 |
| scaffold00206 | 138971 | 140439 | 1469  | 0.39  | C_unshiu_00026 | 45470  | 44006  | 1465  | 0.19  | 98.3  |
| scaffold00206 | 163415 | 168189 | 4775  | 1.26  | C_unshiu_00026 | 18675  | 13871  | 4805  | 0.64  | 98.92 |
| scaffold00206 | 170249 | 173598 | 3350  | 0.88  | C_unshiu_00026 | 10753  | 7407   | 3347  | 0.44  | 99.7  |
| scaffold00206 | 179327 | 202328 | 23002 | 6.08  | C_unshiu_01763 | 49180  | 26182  | 22999 | 46.1  | 99.89 |
| scaffold00206 | 203767 | 227871 | 24105 | 6.37  | C_unshiu_01763 | 24104  | 1      | 24104 | 48.32 | 99.83 |

|               |        |        |       |       |                |        |        |       |       |       |
|---------------|--------|--------|-------|-------|----------------|--------|--------|-------|-------|-------|
| scaffold00206 | 227486 | 257565 | 30080 | 7.95  | C_unshiu_01679 | 1      | 30061  | 30061 | 56.12 | 98.82 |
| scaffold00206 | 255211 | 259036 | 3826  | 1.01  | C_unshiu_02687 | 16330  | 20170  | 3841  | 19.04 | 98.31 |
| scaffold00206 | 257685 | 264263 | 6579  | 1.74  | C_unshiu_01679 | 30067  | 36619  | 6553  | 12.23 | 98.19 |
| scaffold00206 | 278033 | 279139 | 1107  | 0.29  | C_unshiu_01086 | 24413  | 25515  | 1103  | 1.13  | 98.38 |
| scaffold00206 | 279141 | 281172 | 2032  | 0.54  | C_unshiu_01848 | 30039  | 32070  | 2032  | 4.37  | 100   |
| scaffold00206 | 281606 | 283891 | 2286  | 0.6   | C_unshiu_01848 | 32658  | 34943  | 2286  | 4.91  | 99.91 |
| scaffold00206 | 289093 | 292409 | 3317  | 0.88  | C_unshiu_01848 | 39169  | 42482  | 3314  | 7.12  | 99.79 |
| scaffold00206 | 294808 | 295888 | 1081  | 0.29  | C_unshiu_01848 | 45484  | 46548  | 1065  | 2.29  | 98.24 |
| scaffold00206 | 299039 | 307525 | 8487  | 2.24  | C_unshiu_01086 | 30970  | 39456  | 8487  | 8.71  | 98.61 |
| scaffold00206 | 307740 | 312436 | 4697  | 1.24  | C_unshiu_01086 | 40087  | 44846  | 4760  | 4.88  | 98.26 |
| scaffold00206 | 318047 | 342723 | 24677 | 6.52  | C_unshiu_01086 | 54907  | 79673  | 24767 | 25.41 | 98.69 |
| scaffold00206 | 351489 | 357374 | 5886  | 1.55  | C_unshiu_01086 | 88301  | 94208  | 5908  | 6.06  | 98.77 |
| scaffold00221 | 689    | 40803  | 40115 | 10.94 | C_unshiu_00380 | 55367  | 15180  | 40188 | 17.48 | 98.58 |
| scaffold00221 | 40819  | 48360  | 7542  | 2.06  | C_unshiu_00380 | 14214  | 6695   | 7520  | 3.27  | 98.1  |
| scaffold00221 | 41778  | 73061  | 31284 | 8.53  | C_unshiu_00176 | 121091 | 89842  | 31250 | 8.65  | 98.87 |
| scaffold00221 | 73074  | 77483  | 4410  | 1.2   | C_unshiu_00176 | 86304  | 81895  | 4410  | 1.22  | 100   |
| scaffold00221 | 124300 | 128924 | 4625  | 1.26  | C_unshiu_00835 | 15817  | 20402  | 4586  | 3.69  | 98.32 |
| scaffold00221 | 145760 | 152856 | 7097  | 1.94  | C_unshiu_00176 | 24092  | 16991  | 7102  | 1.96  | 98.58 |
| scaffold00221 | 152851 | 157179 | 4329  | 1.18  | C_unshiu_00176 | 16774  | 12426  | 4349  | 1.2   | 98.71 |
| scaffold00221 | 177155 | 181845 | 4691  | 1.28  | C_unshiu_00176 | 8579   | 3856   | 4724  | 1.31  | 98.62 |
| scaffold00221 | 188303 | 194461 | 6159  | 1.68  | C_unshiu_00241 | 213828 | 219969 | 6142  | 2.04  | 98.36 |
| scaffold00221 | 208058 | 209741 | 1684  | 0.46  | C_unshiu_00241 | 222954 | 224641 | 1688  | 0.56  | 98.11 |
| scaffold00221 | 211283 | 213786 | 2504  | 0.68  | C_unshiu_00241 | 226166 | 228674 | 2509  | 0.83  | 99.16 |
| scaffold00221 | 213915 | 227277 | 13363 | 3.64  | C_unshiu_00241 | 228666 | 242072 | 13407 | 4.46  | 98.13 |
| scaffold00221 | 228715 | 232270 | 3556  | 0.97  | C_unshiu_00241 | 244346 | 247873 | 3528  | 1.17  | 98.9  |
| scaffold00221 | 232271 | 249112 | 16842 | 4.59  | C_unshiu_00241 | 247970 | 264809 | 16840 | 5.6   | 98.96 |
| scaffold00221 | 257183 | 263669 | 6487  | 1.77  | C_unshiu_01569 | 42227  | 35743  | 6485  | 10.96 | 99.52 |
| scaffold00221 | 269567 | 274348 | 4782  | 1.3   | C_unshiu_00241 | 280486 | 285269 | 4784  | 1.59  | 99.25 |
| scaffold00221 | 291557 | 294828 | 3272  | 0.89  | C_unshiu_00032 | 548658 | 545387 | 3272  | 0.47  | 100   |
| scaffold00221 | 294828 | 314207 | 19380 | 5.29  | C_unshiu_00821 | 42236  | 61606  | 19371 | 15.35 | 98.7  |
| scaffold00221 | 332391 | 335860 | 3470  | 0.95  | C_unshiu_00821 | 79885  | 83330  | 3446  | 2.73  | 98.96 |
| scaffold00221 | 344648 | 345920 | 1273  | 0.35  | C_unshiu_00821 | 93740  | 95012  | 1273  | 1.01  | 98.74 |
| scaffold00221 | 348076 | 351032 | 2957  | 0.81  | C_unshiu_01737 | 22993  | 25928  | 2936  | 5.74  | 98.01 |
| scaffold00222 | 3674   | 13822  | 10149 | 2.77  | C_unshiu_01727 | 19126  | 8988   | 10139 | 19.65 | 98.59 |
| scaffold00222 | 18423  | 21274  | 2852  | 0.78  | C_unshiu_02852 | 7982   | 10833  | 2852  | 17.12 | 100   |
| scaffold00222 | 23981  | 28515  | 4535  | 1.24  | C_unshiu_02852 | 12131  | 16663  | 4533  | 27.2  | 99.96 |
| scaffold00222 | 41215  | 43391  | 2177  | 0.59  | C_unshiu_00982 | 108483 | 106309 | 2175  | 2     | 99.91 |
| scaffold00222 | 43532  | 47556  | 4025  | 1.1   | C_unshiu_00982 | 106169 | 102145 | 4025  | 3.71  | 99.63 |
| scaffold00222 | 51948  | 53722  | 1775  | 0.48  | C_unshiu_02852 | 1      | 1777   | 1777  | 10.66 | 99.83 |
| scaffold00222 | 53748  | 60176  | 6429  | 1.76  | C_unshiu_00982 | 94564  | 88135  | 6430  | 5.93  | 99.49 |
| scaffold00222 | 60878  | 66894  | 6017  | 1.64  | C_unshiu_00982 | 87128  | 81119  | 6010  | 5.54  | 99.68 |
| scaffold00222 | 69112  | 71691  | 2580  | 0.7   | C_unshiu_00982 | 78493  | 75921  | 2573  | 2.37  | 99.57 |
| scaffold00222 | 71699  | 73805  | 2107  | 0.58  | C_unshiu_00982 | 75689  | 73583  | 2107  | 1.94  | 99.91 |
| scaffold00222 | 73825  | 76358  | 2534  | 0.69  | C_unshiu_00982 | 73692  | 71157  | 2536  | 2.34  | 99.65 |
| scaffold00222 | 77091  | 84542  | 7452  | 2.03  | C_unshiu_00982 | 70023  | 62573  | 7451  | 6.87  | 99.92 |
| scaffold00222 | 87503  | 93842  | 6340  | 1.73  | C_unshiu_00982 | 59652  | 53343  | 6310  | 5.82  | 99.4  |
| scaffold00222 | 101463 | 116584 | 15122 | 4.13  | C_unshiu_00982 | 50947  | 35873  | 15075 | 13.9  | 98.77 |
| scaffold00222 | 120266 | 124477 | 4212  | 1.15  | C_unshiu_00982 | 34611  | 30398  | 4214  | 3.88  | 99.17 |
| scaffold00222 | 125675 | 129830 | 4156  | 1.13  | C_unshiu_00982 | 24293  | 20155  | 4139  | 3.82  | 98.47 |
| scaffold00222 | 129999 | 131360 | 1362  | 0.37  | C_unshiu_00071 | 468789 | 470150 | 1362  | 0.26  | 99.63 |
| scaffold00222 | 147677 | 149825 | 2149  | 0.59  | C_unshiu_00982 | 6166   | 4018   | 2149  | 1.98  | 100   |
| scaffold00222 | 155510 | 160122 | 4613  | 1.26  | C_unshiu_00982 | 11162  | 6550   | 4613  | 4.25  | 99.09 |
| scaffold00222 | 160117 | 162049 | 1933  | 0.53  | C_unshiu_00595 | 130692 | 132624 | 1933  | 1.15  | 99.9  |
| scaffold00222 | 164042 | 165974 | 1933  | 0.53  | C_unshiu_01521 | 48525  | 46600  | 1926  | 3.1   | 98.4  |
| scaffold00222 | 167770 | 168997 | 1228  | 0.34  | C_unshiu_01521 | 43974  | 42747  | 1228  | 1.97  | 100   |
| scaffold00222 | 169353 | 171558 | 2206  | 0.6   | C_unshiu_01521 | 42228  | 40023  | 2206  | 3.55  | 99.95 |
| scaffold00222 | 172004 | 175318 | 3315  | 0.91  | C_unshiu_00595 | 141753 | 145067 | 3315  | 1.97  | 99.73 |
| scaffold00222 | 180264 | 196685 | 16422 | 4.48  | C_unshiu_00595 | 151890 | 168388 | 16499 | 9.78  | 98.26 |
| scaffold00222 | 202463 | 210849 | 8387  | 2.29  | C_unshiu_00208 | 10972  | 19353  | 8382  | 2.54  | 99.15 |
| scaffold00222 | 216311 | 221597 | 5287  | 1.44  | C_unshiu_01327 | 66646  | 61359  | 5288  | 7.03  | 98.22 |
| scaffold00222 | 245221 | 261157 | 15937 | 4.35  | C_unshiu_00208 | 47630  | 63534  | 15905 | 4.81  | 98.18 |
| scaffold00222 | 261760 | 272495 | 10736 | 2.93  | C_unshiu_00208 | 65405  | 76152  | 10748 | 3.25  | 99.24 |
| scaffold00222 | 276883 | 283505 | 6623  | 1.81  | C_unshiu_03029 | 12096  | 5500   | 6597  | 54.54 | 98.3  |
| scaffold00222 | 281303 | 286777 | 5475  | 1.49  | C_unshiu_00208 | 84560  | 90045  | 5486  | 1.66  | 99.02 |
| scaffold00222 | 305224 | 307767 | 2544  | 0.69  | C_unshiu_03029 | 3240   | 703    | 2538  | 20.98 | 98.2  |
| scaffold00222 | 317339 | 318689 | 1351  | 0.37  | C_unshiu_00282 | 238514 | 239864 | 1351  | 0.49  | 99.85 |
| scaffold00222 | 319005 | 324890 | 5886  | 1.61  | C_unshiu_00282 | 239864 | 245734 | 5871  | 2.13  | 98.73 |
| scaffold00222 | 321407 | 328887 | 7481  | 2.04  | C_unshiu_00208 | 179943 | 187426 | 7484  | 2.27  | 98.24 |
| scaffold00222 | 331182 | 333773 | 2592  | 0.71  | C_unshiu_00282 | 229995 | 232585 | 2591  | 0.94  | 98.66 |
| scaffold00222 | 333930 | 352706 | 18777 | 5.13  | C_unshiu_00282 | 257490 | 276233 | 18744 | 6.79  | 99.43 |
| scaffold00222 | 356056 | 357351 | 1296  | 0.35  | C_unshiu_00282 | 233524 | 234819 | 1296  | 0.47  | 100   |
| scaffold00222 | 358589 | 360057 | 1469  | 0.4   | C_unshiu_00282 | 234813 | 236281 | 1469  | 0.53  | 99.66 |
| scaffold00222 | 360059 | 361392 | 1334  | 0.36  | C_unshiu_00282 | 236827 | 238162 | 1336  | 0.48  | 99.55 |
| scaffold00222 | 361389 | 363830 | 2442  | 0.67  | C_unshiu_00208 | 139263 | 141703 | 2441  | 0.74  | 99.84 |
| scaffold00222 | 364022 | 366282 | 2261  | 0.62  | C_unshiu_00208 | 142279 | 144539 | 2261  | 0.68  | 99.91 |
| scaffold00223 | 1      | 2182   | 2182  | 0.6   | C_unshiu_01020 | 2255   | 4438   | 2184  | 2.1   | 99.31 |
| scaffold00223 | 1      | 2182   | 2182  | 0.6   | C_unshiu_01179 | 74458  | 76653  | 2196  | 2.51  | 98.77 |
| scaffold00223 | 12708  | 19890  | 7183  | 1.98  | C_unshiu_00906 | 89803  | 82621  | 7183  | 6.17  | 100   |
| scaffold00223 | 19891  | 22994  | 3104  | 0.85  | C_unshiu_00530 | 82703  | 85807  | 3105  | 1.69  | 98.71 |

|               |        |        |       |       |                |        |        |       |       |       |
|---------------|--------|--------|-------|-------|----------------|--------|--------|-------|-------|-------|
| scaffold00223 | 25416  | 30999  | 5584  | 1.54  | C_unshiu_01020 | 17513  | 23094  | 5582  | 5.37  | 99.59 |
| scaffold00223 | 31105  | 32575  | 1471  | 0.41  | C_unshiu_01020 | 23962  | 25434  | 1473  | 1.42  | 98.31 |
| scaffold00223 | 34034  | 40223  | 6190  | 1.7   | C_unshiu_00530 | 177884 | 184052 | 6169  | 3.35  | 98.35 |
| scaffold00223 | 61133  | 69534  | 8402  | 2.31  | C_unshiu_01020 | 42973  | 51395  | 8423  | 8.1   | 98.33 |
| scaffold00223 | 69654  | 72035  | 2382  | 0.66  | C_unshiu_01020 | 51687  | 54068  | 2382  | 2.29  | 98.74 |
| scaffold00223 | 106344 | 110434 | 4091  | 1.13  | C_unshiu_01020 | 90862  | 94957  | 4096  | 3.94  | 98.73 |
| scaffold00223 | 129087 | 133643 | 4557  | 1.25  | C_unshiu_02121 | 31994  | 27415  | 4580  | 12.78 | 98.19 |
| scaffold00223 | 137405 | 152800 | 15396 | 4.24  | C_unshiu_00407 | 215158 | 199639 | 15520 | 6.99  | 98.46 |
| scaffold00223 | 148117 | 154852 | 6736  | 1.85  | C_unshiu_02121 | 14350  | 7524   | 6827  | 19.05 | 98.26 |
| scaffold00223 | 152841 | 159745 | 6905  | 1.9   | C_unshiu_00407 | 199646 | 192732 | 6915  | 3.12  | 98.77 |
| scaffold00223 | 158185 | 161396 | 3212  | 0.88  | C_unshiu_02121 | 6595   | 3384   | 3212  | 8.96  | 99.91 |
| scaffold00223 | 161532 | 164520 | 2989  | 0.82  | C_unshiu_02121 | 2964   | 1      | 2964  | 8.27  | 98.4  |
| scaffold00223 | 172344 | 173511 | 1168  | 0.32  | C_unshiu_00407 | 188368 | 187201 | 1168  | 0.53  | 99.49 |
| scaffold00223 | 182398 | 183999 | 1602  | 0.44  | C_unshiu_00407 | 179321 | 177717 | 1605  | 0.72  | 99.13 |
| scaffold00223 | 209334 | 218186 | 8853  | 2.44  | C_unshiu_00407 | 151668 | 142840 | 8829  | 3.98  | 98.87 |
| scaffold00223 | 231256 | 232649 | 1394  | 0.38  | C_unshiu_00300 | 4171   | 5564   | 1394  | 0.52  | 100   |
| scaffold00223 | 232832 | 238331 | 5500  | 1.51  | C_unshiu_00407 | 137025 | 131504 | 5522  | 2.49  | 98.86 |
| scaffold00223 | 238325 | 245129 | 6805  | 1.87  | C_unshiu_00407 | 131444 | 124607 | 6838  | 3.08  | 98.96 |
| scaffold00223 | 245128 | 249055 | 3928  | 1.08  | C_unshiu_00407 | 123989 | 120085 | 3905  | 1.76  | 98.58 |
| scaffold00223 | 252651 | 265900 | 13250 | 3.65  | C_unshiu_02697 | 19891  | 6666   | 13226 | 66.49 | 98.2  |
| scaffold00223 | 267301 | 294100 | 26800 | 7.38  | C_unshiu_00407 | 108534 | 81740  | 26795 | 12.07 | 99.3  |
| scaffold00223 | 294097 | 294838 | 4342  | 1.2   | C_unshiu_00323 | 171889 | 176230 | 4342  | 1.7   | 100   |
| scaffold00223 | 299686 | 315902 | 16217 | 4.47  | C_unshiu_00407 | 75863  | 59594  | 16270 | 7.33  | 98.55 |
| scaffold00223 | 320144 | 342047 | 21904 | 6.03  | C_unshiu_00407 | 55528  | 33640  | 21889 | 9.86  | 98.91 |
| scaffold00223 | 338123 | 357332 | 19210 | 5.29  | C_unshiu_00976 | 88541  | 69441  | 19101 | 17.54 | 98.79 |
| scaffold00226 | 6465   | 18051  | 11587 | 3.21  | C_unshiu_00526 | 136823 | 148454 | 11632 | 6.3   | 98.72 |
| scaffold00226 | 9367   | 21712  | 12346 | 3.42  | C_unshiu_01923 | 43890  | 31526  | 12365 | 28.17 | 99.68 |
| scaffold00226 | 29078  | 32590  | 3513  | 0.97  | C_unshiu_01923 | 16486  | 19982  | 3497  | 7.97  | 99.09 |
| scaffold00226 | 31649  | 33669  | 2021  | 0.56  | C_unshiu_00526 | 113284 | 115307 | 2024  | 1.1   | 99.21 |
| scaffold00226 | 37356  | 47979  | 10624 | 2.94  | C_unshiu_00526 | 118079 | 128703 | 10625 | 5.76  | 99.31 |
| scaffold00226 | 60427  | 77476  | 17050 | 4.72  | C_unshiu_00526 | 147387 | 164402 | 17016 | 9.22  | 99.54 |
| scaffold00226 | 81223  | 83058  | 1836  | 0.51  | C_unshiu_00666 | 143537 | 145370 | 1834  | 1.2   | 99.67 |
| scaffold00226 | 86309  | 90114  | 3806  | 1.05  | C_unshiu_00526 | 172973 | 176755 | 3783  | 2.05  | 98.35 |
| scaffold00226 | 94110  | 96050  | 1941  | 0.54  | C_unshiu_00526 | 179827 | 181764 | 1938  | 1.05  | 99.54 |
| scaffold00226 | 96045  | 97582  | 1538  | 0.43  | C_unshiu_01042 | 5239   | 3702   | 1538  | 1.52  | 98.31 |
| scaffold00226 | 99133  | 100296 | 1164  | 0.32  | C_unshiu_01042 | 6408   | 5245   | 1164  | 1.15  | 100   |
| scaffold00226 | 100917 | 102119 | 1203  | 0.33  | C_unshiu_01042 | 2093   | 891    | 1203  | 1.19  | 99.58 |
| scaffold00226 | 103027 | 109501 | 6475  | 1.79  | C_unshiu_00666 | 152294 | 145826 | 6469  | 4.23  | 99.85 |
| scaffold00226 | 112323 | 113847 | 1525  | 0.42  | C_unshiu_00666 | 143399 | 141882 | 1518  | 0.99  | 98.95 |
| scaffold00226 | 115483 | 117021 | 1539  | 0.43  | C_unshiu_00666 | 140099 | 138560 | 1540  | 1.01  | 99.87 |
| scaffold00226 | 122211 | 123572 | 1362  | 0.38  | C_unshiu_00666 | 133179 | 131814 | 1366  | 0.89  | 98.76 |
| scaffold00226 | 123841 | 132143 | 8303  | 2.3   | C_unshiu_00666 | 131190 | 122847 | 8344  | 5.46  | 99.22 |
| scaffold00226 | 132880 | 180510 | 47631 | 13.19 | C_unshiu_00666 | 121752 | 74041  | 47712 | 31.21 | 98.92 |
| scaffold00226 | 180510 | 188377 | 7868  | 2.18  | C_unshiu_00666 | 73949  | 66082  | 7868  | 5.15  | 99.47 |
| scaffold00226 | 191369 | 193305 | 1937  | 0.54  | C_unshiu_01940 | 17861  | 19797  | 1937  | 4.48  | 100   |
| scaffold00226 | 194600 | 203085 | 8486  | 2.35  | C_unshiu_01940 | 21793  | 30285  | 8493  | 19.65 | 98.98 |
| scaffold00226 | 214486 | 215753 | 1268  | 0.35  | C_unshiu_01940 | 39749  | 41016  | 1268  | 2.93  | 100   |
| scaffold00226 | 220288 | 224885 | 4598  | 1.27  | C_unshiu_00896 | 75274  | 79917  | 4644  | 3.95  | 98.3  |
| scaffold00226 | 254462 | 267962 | 13501 | 3.74  | C_unshiu_00851 | 92075  | 78575  | 13501 | 11.02 | 100   |
| scaffold00226 | 269504 | 273403 | 3900  | 1.08  | C_unshiu_00851 | 75981  | 72085  | 3897  | 3.18  | 99.82 |
| scaffold00226 | 273429 | 313590 | 40162 | 11.12 | C_unshiu_00896 | 22962  | 63163  | 40202 | 34.17 | 99.39 |
| scaffold00226 | 316885 | 338020 | 21136 | 5.85  | C_unshiu_00666 | 57563  | 36427  | 21137 | 13.83 | 99.98 |
| scaffold00226 | 338072 | 359575 | 21504 | 5.96  | C_unshiu_00666 | 36102  | 14644  | 21459 | 14.04 | 99.78 |
| scaffold00226 | 339576 | 361108 | 21533 | 5.96  | C_unshiu_00666 | 34621  | 13111  | 21511 | 14.07 | 99.9  |
| scaffold00228 | 7203   | 8343   | 1141  | 0.32  | C_unshiu_02043 | 36952  | 35810  | 1143  | 2.93  | 99.74 |
| scaffold00228 | 8350   | 10823  | 2474  | 0.69  | C_unshiu_02229 | 29861  | 32326  | 2466  | 7.63  | 98.02 |
| scaffold00228 | 12609  | 13711  | 1103  | 0.31  | C_unshiu_01967 | 26281  | 25182  | 1100  | 2.63  | 98.1  |
| scaffold00228 | 26683  | 27754  | 1072  | 0.3   | C_unshiu_03055 | 8436   | 9507   | 1072  | 9.51  | 98.79 |
| scaffold00228 | 28549  | 33672  | 5124  | 1.43  | C_unshiu_02476 | 7955   | 13080  | 5126  | 20.17 | 98.14 |
| scaffold00228 | 34456  | 37281  | 2826  | 0.79  | C_unshiu_01837 | 6322   | 3518   | 2805  | 5.96  | 98.13 |
| scaffold00228 | 41300  | 53048  | 11749 | 3.28  | C_unshiu_00344 | 19125  | 7455   | 11671 | 4.71  | 98.16 |
| scaffold00228 | 54566  | 67154  | 12589 | 3.51  | C_unshiu_00939 | 78090  | 90678  | 12589 | 11.19 | 99.94 |
| scaffold00228 | 70405  | 82655  | 12251 | 3.42  | C_unshiu_00939 | 92737  | 104987 | 12251 | 10.89 | 99.36 |
| scaffold00228 | 89598  | 93192  | 3595  | 1     | C_unshiu_00939 | 108857 | 112453 | 3597  | 3.2   | 99.42 |
| scaffold00228 | 89603  | 98980  | 9378  | 2.62  | C_unshiu_00229 | 49912  | 59315  | 9404  | 3.04  | 99.44 |
| scaffold00228 | 101599 | 126568 | 24970 | 6.97  | C_unshiu_00229 | 59677  | 84660  | 24984 | 8.07  | 99.48 |
| scaffold00228 | 134442 | 155162 | 20721 | 5.78  | C_unshiu_00229 | 93752  | 114503 | 20752 | 6.7   | 99.28 |
| scaffold00228 | 155304 | 158163 | 2860  | 0.8   | C_unshiu_00229 | 114495 | 117355 | 2861  | 0.92  | 99.76 |
| scaffold00228 | 158155 | 173405 | 15251 | 4.26  | C_unshiu_00229 | 117762 | 133044 | 15283 | 4.94  | 98.93 |
| scaffold00228 | 172860 | 250982 | 78123 | 21.8  | C_unshiu_00229 | 133045 | 211140 | 78096 | 25.22 | 99.17 |
| scaffold00228 | 252458 | 260397 | 7940  | 2.22  | C_unshiu_00229 | 212005 | 219943 | 7939  | 2.56  | 99.74 |
| scaffold00228 | 262613 | 267820 | 5208  | 1.45  | C_unshiu_00229 | 308528 | 303330 | 5199  | 1.68  | 99.65 |
| scaffold00228 | 267816 | 271082 | 3267  | 0.91  | C_unshiu_00229 | 303176 | 299927 | 3250  | 1.05  | 98.23 |
| scaffold00228 | 276870 | 280596 | 3727  | 1.04  | C_unshiu_03097 | 5129   | 8857   | 3729  | 39.08 | 99.87 |
| scaffold00228 | 289047 | 294369 | 5323  | 1.49  | C_unshiu_01584 | 31788  | 37105  | 5318  | 9.1   | 99.91 |
| scaffold00228 | 297045 | 300039 | 2995  | 0.84  | C_unshiu_01584 | 37906  | 40900  | 2995  | 5.13  | 99.8  |
| scaffold00228 | 300039 | 317525 | 17487 | 4.88  | C_unshiu_01584 | 41003  | 58421  | 17419 | 29.82 | 99.56 |
| scaffold00228 | 323846 | 325095 | 1250  | 0.35  | C_unshiu_00403 | 219865 | 218616 | 1250  | 0.56  | 98.64 |
| scaffold00228 | 328214 | 329310 | 1097  | 0.31  | C_unshiu_01632 | 54892  | 53796  | 1097  | 1.96  | 99.64 |

|               |        |        |       |       |                |        |        |       |       |       |
|---------------|--------|--------|-------|-------|----------------|--------|--------|-------|-------|-------|
| scaffold00228 | 340036 | 341725 | 1690  | 0.47  | C_unshiu_02622 | 18567  | 20231  | 1665  | 7.7   | 98.34 |
| scaffold00228 | 342781 | 345821 | 3041  | 0.85  | C_unshiu_02622 | 8450   | 11492  | 3043  | 14.08 | 99.08 |
| scaffold00232 | 48705  | 52622  | 3918  | 1.11  | C_unshiu_00121 | 268331 | 272252 | 3922  | 0.93  | 98.93 |
| scaffold00232 | 93987  | 100554 | 6568  | 1.87  | C_unshiu_00121 | 313478 | 320018 | 6541  | 1.55  | 98.22 |
| scaffold00232 | 115624 | 136041 | 20418 | 5.8   | C_unshiu_00121 | 334532 | 354843 | 20312 | 4.82  | 98.42 |
| scaffold00232 | 149926 | 158633 | 8708  | 2.47  | C_unshiu_00121 | 374607 | 383365 | 8759  | 2.08  | 98.15 |
| scaffold00232 | 158700 | 167066 | 8367  | 2.38  | C_unshiu_00121 | 383865 | 392255 | 8391  | 1.99  | 98.87 |
| scaffold00232 | 172419 | 173487 | 1069  | 0.3   | C_unshiu_01536 | 48388  | 47324  | 1065  | 1.74  | 98.13 |
| scaffold00232 | 180274 | 186042 | 5769  | 1.64  | C_unshiu_00121 | 404541 | 410330 | 5790  | 1.37  | 98.5  |
| scaffold00232 | 186274 | 188064 | 1791  | 0.51  | C_unshiu_00121 | 410441 | 412231 | 1791  | 0.42  | 99.66 |
| scaffold00232 | 189695 | 197546 | 7852  | 2.23  | C_unshiu_03038 | 768    | 8621   | 7854  | 66.41 | 99.87 |
| scaffold00232 | 198664 | 200363 | 1700  | 0.48  | C_unshiu_03038 | 10128  | 11827  | 1700  | 14.37 | 100   |
| scaffold00232 | 200997 | 209370 | 8374  | 2.38  | C_unshiu_01633 | 1      | 8371   | 8371  | 15.01 | 99.87 |
| scaffold00232 | 211803 | 220538 | 8736  | 2.48  | C_unshiu_01633 | 9866   | 18644  | 8779  | 15.74 | 98.71 |
| scaffold00232 | 221053 | 223077 | 2025  | 0.58  | C_unshiu_00251 | 35786  | 33762  | 2025  | 0.69  | 100   |
| scaffold00232 | 231635 | 236913 | 5279  | 1.5   | C_unshiu_00785 | 5460   | 155    | 5306  | 4.07  | 98.49 |
| scaffold00232 | 247016 | 260365 | 13350 | 3.79  | C_unshiu_00785 | 22375  | 35781  | 13407 | 10.27 | 98.3  |
| scaffold00232 | 278954 | 288205 | 9252  | 2.63  | C_unshiu_00785 | 52533  | 61818  | 9286  | 7.12  | 98.73 |
| scaffold00232 | 314914 | 351633 | 36720 | 10.43 | C_unshiu_00785 | 86235  | 123058 | 36824 | 28.22 | 98.57 |
| scaffold00234 | 502    | 5736   | 5235  | 1.5   | C_unshiu_00757 | 39988  | 34754  | 5235  | 3.88  | 99.96 |
| scaffold00234 | 30964  | 38173  | 7210  | 2.07  | C_unshiu_00724 | 17923  | 25143  | 7221  | 5.16  | 99.14 |
| scaffold00234 | 43638  | 45632  | 1995  | 0.57  | C_unshiu_00724 | 31362  | 33361  | 2000  | 1.43  | 98.9  |
| scaffold00234 | 64250  | 80731  | 16482 | 4.73  | C_unshiu_00724 | 46212  | 62685  | 16474 | 11.77 | 98.38 |
| scaffold00234 | 85707  | 108531 | 22825 | 6.54  | C_unshiu_00724 | 73047  | 95851  | 22805 | 16.29 | 98.75 |
| scaffold00234 | 115778 | 150913 | 35136 | 10.07 | C_unshiu_00280 | 35136  | 1      | 35136 | 12.7  | 99.97 |
| scaffold00234 | 200013 | 213435 | 13423 | 3.85  | C_unshiu_01424 | 2506   | 15941  | 13436 | 19.54 | 99.63 |
| scaffold00234 | 210849 | 219417 | 8569  | 2.46  | C_unshiu_01424 | 55250  | 63789  | 8540  | 12.42 | 99.15 |
| scaffold00234 | 219768 | 221309 | 1542  | 0.44  | C_unshiu_01424 | 64240  | 65781  | 1542  | 2.24  | 100   |
| scaffold00234 | 221304 | 222643 | 1340  | 0.38  | C_unshiu_00104 | 298152 | 299491 | 1340  | 0.3   | 100   |
| scaffold00234 | 222644 | 240312 | 17669 | 5.07  | C_unshiu_01424 | 21908  | 39573  | 17666 | 25.69 | 99.89 |
| scaffold00234 | 252121 | 254023 | 1903  | 0.55  | C_unshiu_01424 | 48253  | 50155  | 1903  | 2.77  | 99.95 |
| scaffold00234 | 283652 | 284871 | 1220  | 0.35  | C_unshiu_00856 | 82465  | 81246  | 1220  | 1     | 100   |
| scaffold00234 | 298571 | 304798 | 6228  | 1.79  | C_unshiu_03106 | 6219   | 1      | 6219  | 68.08 | 99.66 |
| scaffold00234 | 318051 | 322992 | 4942  | 1.42  | C_unshiu_01666 | 54381  | 49483  | 4899  | 9.01  | 98.89 |
| scaffold00234 | 321518 | 342947 | 21430 | 6.14  | C_unshiu_01666 | 49487  | 28225  | 21263 | 39.1  | 99.04 |
| scaffold00235 | 2275   | 4264   | 1990  | 0.57  | C_unshiu_00364 | 197414 | 195425 | 1990  | 0.85  | 99.65 |
| scaffold00235 | 18271  | 19546  | 1276  | 0.37  | C_unshiu_00364 | 180496 | 179215 | 1282  | 0.55  | 98.83 |
| scaffold00235 | 27330  | 28409  | 1080  | 0.31  | C_unshiu_00364 | 181496 | 180417 | 1080  | 0.46  | 99.54 |
| scaffold00235 | 63772  | 78711  | 14940 | 4.29  | C_unshiu_01936 | 20404  | 35363  | 14960 | 34.53 | 98.78 |
| scaffold00235 | 79632  | 80850  | 1219  | 0.35  | C_unshiu_01627 | 1768   | 2986   | 1219  | 2.17  | 100   |
| scaffold00235 | 81113  | 85194  | 4082  | 1.17  | C_unshiu_01627 | 3590   | 7672   | 4083  | 7.27  | 99.95 |
| scaffold00235 | 85204  | 90019  | 4816  | 1.38  | C_unshiu_01627 | 8510   | 13317  | 4808  | 8.56  | 98.76 |
| scaffold00235 | 103051 | 105153 | 2103  | 0.6   | C_unshiu_02594 | 2132   | 34     | 2099  | 9.4   | 99.81 |
| scaffold00235 | 146515 | 148271 | 1757  | 0.5   | C_unshiu_00191 | 256746 | 254987 | 1760  | 0.51  | 98.01 |
| scaffold00235 | 150706 | 155435 | 4730  | 1.36  | C_unshiu_00264 | 113884 | 109155 | 4730  | 1.66  | 99.92 |
| scaffold00235 | 156109 | 164635 | 8527  | 2.45  | C_unshiu_00264 | 108057 | 99521  | 8537  | 3     | 99.37 |
| scaffold00235 | 166256 | 168709 | 2454  | 0.7   | C_unshiu_00264 | 97059  | 94600  | 2460  | 0.86  | 98.7  |
| scaffold00235 | 177469 | 179762 | 2294  | 0.66  | C_unshiu_00264 | 85997  | 83702  | 2296  | 0.81  | 99.91 |
| scaffold00235 | 225823 | 227118 | 1296  | 0.37  | C_unshiu_01925 | 27766  | 29062  | 1297  | 2.96  | 99.92 |
| scaffold00235 | 227105 | 228389 | 1285  | 0.37  | C_unshiu_01812 | 11530  | 10246  | 1285  | 2.67  | 99.46 |
| scaffold00235 | 242001 | 248639 | 6639  | 1.91  | C_unshiu_03005 | 1      | 6662   | 6662  | 52.24 | 99.37 |
| scaffold00235 | 248648 | 249908 | 1261  | 0.36  | C_unshiu_03005 | 6870   | 8130   | 1261  | 9.89  | 100   |
| scaffold00235 | 249926 | 254083 | 4158  | 1.19  | C_unshiu_03005 | 8642   | 12753  | 4112  | 32.24 | 98.73 |
| scaffold00235 | 261432 | 287440 | 26009 | 7.47  | C_unshiu_00772 | 132423 | 106532 | 25892 | 19.55 | 99.48 |
| scaffold00235 | 287779 | 309635 | 21857 | 6.28  | C_unshiu_00772 | 105805 | 83921  | 21885 | 16.53 | 98.54 |
| scaffold00235 | 310171 | 321265 | 11095 | 3.19  | C_unshiu_00772 | 83040  | 71908  | 11133 | 8.41  | 98.15 |
| scaffold00235 | 321310 | 331789 | 10480 | 3.01  | C_unshiu_00772 | 71911  | 61411  | 10501 | 7.93  | 99.26 |
| scaffold00235 | 335963 | 346020 | 10058 | 2.89  | C_unshiu_00772 | 58006  | 47965  | 10042 | 7.58  | 99.67 |
| scaffold00236 | 14578  | 16668  | 2091  | 0.6   | C_unshiu_00771 | 129468 | 131559 | 2092  | 1.58  | 99.95 |
| scaffold00236 | 15530  | 16736  | 1207  | 0.35  | C_unshiu_00771 | 132761 | 131567 | 1195  | 0.9   | 98.68 |
| scaffold00236 | 17507  | 21932  | 4426  | 1.28  | C_unshiu_00888 | 113877 | 109447 | 4431  | 3.74  | 98.07 |
| scaffold00236 | 28223  | 29970  | 1748  | 0.5   | C_unshiu_00809 | 63537  | 65284  | 1748  | 1.37  | 99.71 |
| scaffold00236 | 32382  | 33579  | 1198  | 0.35  | C_unshiu_00809 | 67796  | 68994  | 1199  | 0.94  | 99.92 |
| scaffold00236 | 38968  | 48098  | 9131  | 2.64  | C_unshiu_00809 | 74270  | 83352  | 9083  | 7.12  | 98.6  |
| scaffold00236 | 48248  | 51670  | 3423  | 0.99  | C_unshiu_00809 | 83368  | 86790  | 3423  | 2.69  | 99.5  |
| scaffold00236 | 57655  | 58759  | 1105  | 0.32  | C_unshiu_00771 | 120060 | 118957 | 1104  | 0.83  | 99.28 |
| scaffold00236 | 59042  | 62015  | 2974  | 0.86  | C_unshiu_00771 | 118666 | 115694 | 2973  | 2.24  | 99.7  |
| scaffold00236 | 63748  | 65600  | 1853  | 0.53  | C_unshiu_00961 | 81102  | 79256  | 1847  | 1.67  | 99.57 |
| scaffold00236 | 93997  | 95859  | 1863  | 0.54  | C_unshiu_00961 | 45863  | 47725  | 1863  | 1.69  | 98.61 |
| scaffold00236 | 100452 | 104608 | 4157  | 1.2   | C_unshiu_00771 | 124639 | 120483 | 4157  | 3.13  | 99.83 |
| scaffold00236 | 106265 | 107281 | 1017  | 0.29  | C_unshiu_00809 | 91489  | 92506  | 1018  | 0.8   | 99.21 |
| scaffold00236 | 109841 | 123894 | 14054 | 4.06  | C_unshiu_00809 | 91716  | 105794 | 14079 | 11.04 | 99.51 |
| scaffold00236 | 126349 | 127602 | 1254  | 0.36  | C_unshiu_00809 | 111486 | 112739 | 1254  | 0.98  | 100   |
| scaffold00236 | 128048 | 136832 | 8785  | 2.54  | C_unshiu_00809 | 113350 | 122135 | 8786  | 6.89  | 99.9  |
| scaffold00236 | 136861 | 141087 | 4227  | 1.22  | C_unshiu_00809 | 122414 | 126614 | 4201  | 3.3   | 98.49 |
| scaffold00236 | 141621 | 174315 | 32695 | 9.44  | C_unshiu_01383 | 59719  | 26914  | 32806 | 45.96 | 99    |
| scaffold00236 | 176088 | 200894 | 24807 | 7.16  | C_unshiu_01383 | 24816  | 1      | 24816 | 34.77 | 99.79 |
| scaffold00236 | 206322 | 207421 | 1100  | 0.32  | C_unshiu_00061 | 207051 | 208150 | 1100  | 0.19  | 100   |
| scaffold00236 | 208163 | 216136 | 7974  | 2.3   | C_unshiu_00061 | 209320 | 217314 | 7995  | 1.38  | 99.2  |

|               |        |        |        |       |                |        |        |        |       |       |
|---------------|--------|--------|--------|-------|----------------|--------|--------|--------|-------|-------|
| scaffold00236 | 224827 | 226200 | 1374   | 0.4   | C_unshiu_00095 | 125483 | 124114 | 1370   | 0.29  | 99.35 |
| scaffold00236 | 230067 | 248572 | 18506  | 5.34  | C_unshiu_00061 | 223617 | 242195 | 18579  | 3.21  | 99.21 |
| scaffold00236 | 251081 | 253964 | 2884   | 0.83  | C_unshiu_00061 | 243423 | 246309 | 2887   | 0.5   | 99.45 |
| scaffold00236 | 256726 | 259347 | 2622   | 0.76  | C_unshiu_00061 | 247899 | 250520 | 2622   | 0.45  | 98.71 |
| scaffold00236 | 259339 | 286667 | 27329  | 7.89  | C_unshiu_00061 | 251123 | 278310 | 27188  | 4.7   | 98.81 |
| scaffold00236 | 287604 | 289574 | 1971   | 0.57  | C_unshiu_00061 | 279150 | 281100 | 1951   | 0.34  | 98.68 |
| scaffold00236 | 290312 | 292085 | 1774   | 0.51  | C_unshiu_00061 | 282049 | 283822 | 1774   | 0.31  | 99.94 |
| scaffold00236 | 292246 | 309015 | 16770  | 4.84  | C_unshiu_00061 | 284329 | 301007 | 16679  | 2.88  | 98.31 |
| scaffold00236 | 309786 | 312332 | 2547   | 0.74  | C_unshiu_00061 | 300987 | 303536 | 2550   | 0.44  | 99.14 |
| scaffold00236 | 313612 | 317200 | 3589   | 1.04  | C_unshiu_00061 | 305320 | 308908 | 3589   | 0.62  | 99.86 |
| scaffold00236 | 317868 | 320060 | 2193   | 0.63  | C_unshiu_00061 | 310030 | 312222 | 2193   | 0.38  | 100   |
| scaffold00236 | 330372 | 332088 | 1717   | 0.5   | C_unshiu_01112 | 73836  | 72125  | 1712   | 1.81  | 99.53 |
| scaffold00237 | 566    | 2338   | 1773   | 0.51  | C_unshiu_00231 | 210418 | 208646 | 1773   | 0.58  | 100   |
| scaffold00237 | 23178  | 33707  | 10530  | 3.05  | C_unshiu_00674 | 150092 | 139568 | 10525  | 7.01  | 99.95 |
| scaffold00237 | 40152  | 42568  | 2417   | 0.7   | C_unshiu_00674 | 132688 | 130269 | 2420   | 1.61  | 99.83 |
| scaffold00237 | 68950  | 73015  | 4066   | 1.18  | C_unshiu_02456 | 4406   | 8471   | 4066   | 15.68 | 99.95 |
| scaffold00237 | 73722  | 75144  | 1423   | 0.41  | C_unshiu_00596 | 151278 | 149856 | 1423   | 0.84  | 99.3  |
| scaffold00237 | 79363  | 85837  | 6475   | 1.87  | C_unshiu_02456 | 12008  | 18479  | 6472   | 24.96 | 99.94 |
| scaffold00237 | 87270  | 93739  | 6470   | 1.87  | C_unshiu_02456 | 19468  | 25934  | 6467   | 24.94 | 99    |
| scaffold00237 | 89672  | 118213 | 28542  | 8.26  | C_unshiu_00596 | 145680 | 117082 | 28599  | 16.96 | 98.45 |
| scaffold00237 | 128684 | 133856 | 5173   | 1.5   | C_unshiu_00596 | 114124 | 108926 | 5199   | 3.08  | 98.14 |
| scaffold00237 | 135477 | 157845 | 22369  | 6.47  | C_unshiu_00596 | 108559 | 86190  | 22370  | 13.26 | 99.88 |
| scaffold00237 | 159537 | 164347 | 4811   | 1.39  | C_unshiu_01977 | 39527  | 34715  | 4813   | 11.63 | 99.21 |
| scaffold00237 | 164930 | 172166 | 7237   | 2.09  | C_unshiu_01977 | 34731  | 27498  | 7234   | 17.48 | 99.56 |
| scaffold00237 | 172167 | 173516 | 1350   | 0.39  | C_unshiu_01094 | 36438  | 37787  | 1350   | 1.4   | 100   |
| scaffold00237 | 182103 | 183893 | 1791   | 0.52  | C_unshiu_00596 | 65622  | 63830  | 1793   | 1.06  | 99.89 |
| scaffold00237 | 187579 | 193719 | 6141   | 1.78  | C_unshiu_00596 | 61537  | 55388  | 6150   | 3.65  | 98.12 |
| scaffold00237 | 193711 | 205613 | 11903  | 3.45  | C_unshiu_00596 | 54547  | 42568  | 11980  | 7.1   | 98.01 |
| scaffold00237 | 210196 | 219582 | 9387   | 2.72  | C_unshiu_00596 | 37641  | 28246  | 9396   | 5.57  | 99.6  |
| scaffold00237 | 220292 | 223458 | 3167   | 0.92  | C_unshiu_00596 | 28247  | 25079  | 3169   | 1.88  | 98.58 |
| scaffold00237 | 223524 | 249129 | 25606  | 7.41  | C_unshiu_00596 | 25656  | 1      | 25656  | 15.21 | 98.9  |
| scaffold00237 | 307585 | 309373 | 1789   | 0.52  | C_unshiu_00518 | 81223  | 83008  | 1786   | 0.96  | 98.71 |
| scaffold00237 | 309376 | 325915 | 16540  | 4.79  | C_unshiu_00518 | 83346  | 99942  | 16597  | 8.94  | 98.51 |
| scaffold00237 | 327833 | 329479 | 1647   | 0.48  | C_unshiu_00518 | 101649 | 103292 | 1644   | 0.89  | 98.79 |
| scaffold00238 | 261    | 33895  | 33635  | 9.75  | C_unshiu_01714 | 18261  | 51944  | 33684  | 64.85 | 99.39 |
| scaffold00238 | 90386  | 91424  | 1039   | 0.3   | C_unshiu_00410 | 74312  | 73274  | 1039   | 0.47  | 100   |
| scaffold00238 | 98092  | 99650  | 1559   | 0.45  | C_unshiu_00058 | 88869  | 87310  | 1560   | 0.26  | 98.91 |
| scaffold00238 | 99771  | 130406 | 30636  | 8.88  | C_unshiu_00058 | 86796  | 56262  | 30535  | 5.17  | 99.08 |
| scaffold00238 | 130414 | 134673 | 4260   | 1.24  | C_unshiu_02746 | 4256   | 1      | 4256   | 22.29 | 99.48 |
| scaffold00238 | 164422 | 170305 | 5884   | 1.71  | C_unshiu_00058 | 24483  | 18626  | 5858   | 0.99  | 98.83 |
| scaffold00238 | 171732 | 175008 | 3277   | 0.95  | C_unshiu_00058 | 18427  | 15166  | 3262   | 0.55  | 98.93 |
| scaffold00238 | 175168 | 179886 | 4719   | 1.37  | C_unshiu_00846 | 42444  | 47112  | 4669   | 3.8   | 98.33 |
| scaffold00238 | 182075 | 191883 | 9809   | 2.84  | C_unshiu_00846 | 47859  | 57687  | 9829   | 8     | 98.49 |
| scaffold00238 | 191880 | 201511 | 9632   | 2.79  | C_unshiu_00846 | 57989  | 67624  | 9636   | 7.84  | 98.8  |
| scaffold00238 | 206515 | 211895 | 5381   | 1.56  | C_unshiu_00846 | 70174  | 75561  | 5388   | 4.38  | 99.18 |
| scaffold00238 | 218611 | 230954 | 12344  | 3.58  | C_unshiu_00846 | 82290  | 94648  | 12359  | 10.05 | 98.82 |
| scaffold00238 | 236062 | 246201 | 10140  | 2.94  | C_unshiu_00846 | 98664  | 108891 | 10228  | 8.32  | 98.15 |
| scaffold00238 | 243387 | 249545 | 6159   | 1.79  | C_unshiu_00695 | 1      | 6158   | 6158   | 4.27  | 98.53 |
| scaffold00238 | 250556 | 251762 | 1207   | 0.35  | C_unshiu_00846 | 110857 | 112063 | 1207   | 0.98  | 99.01 |
| scaffold00238 | 251812 | 253073 | 1262   | 0.37  | C_unshiu_00846 | 112451 | 113712 | 1262   | 1.03  | 100   |
| scaffold00238 | 253083 | 260784 | 7702   | 2.23  | C_unshiu_00846 | 115245 | 122935 | 7691   | 6.26  | 99.52 |
| scaffold00238 | 276280 | 277481 | 1202   | 0.35  | C_unshiu_01213 | 38942  | 40143  | 1202   | 1.43  | 100   |
| scaffold00238 | 302238 | 303503 | 1266   | 0.37  | C_unshiu_01651 | 3150   | 4415   | 1266   | 2.3   | 99.76 |
| scaffold00238 | 309251 | 316215 | 6965   | 2.02  | C_unshiu_00695 | 71798  | 78761  | 6964   | 4.83  | 98.97 |
| scaffold00238 | 318977 | 321034 | 2058   | 0.6   | C_unshiu_00695 | 80257  | 82310  | 2054   | 1.42  | 99.37 |
| scaffold00238 | 325301 | 327005 | 1705   | 0.49  | C_unshiu_00695 | 83321  | 85025  | 1705   | 1.18  | 99.3  |
| scaffold00238 | 331961 | 334573 | 2613   | 0.76  | C_unshiu_02273 | 27596  | 24989  | 2608   | 8.51  | 99.81 |
| scaffold00238 | 335007 | 336913 | 1907   | 0.55  | C_unshiu_02273 | 24203  | 22301  | 1903   | 6.21  | 99.58 |
| scaffold00238 | 337143 | 344754 | 7612   | 2.21  | C_unshiu_01224 | 62370  | 54758  | 7613   | 9.14  | 99.95 |
| scaffold00238 | 337159 | 344755 | 7597   | 2.2   | C_unshiu_01423 | 43557  | 51153  | 7597   | 11.03 | 100   |
| scaffold00240 | 10718  | 292081 | 281364 | 81.93 | C_unshiu_00113 | 99020  | 380409 | 281390 | 64.76 | 99.97 |
| scaffold00240 | 293384 | 305627 | 12244  | 3.57  | C_unshiu_00113 | 380969 | 393217 | 12249  | 2.82  | 99.93 |
| scaffold00240 | 305757 | 308751 | 2995   | 0.87  | C_unshiu_01719 | 25541  | 22529  | 3013   | 5.81  | 98.61 |
| scaffold00240 | 310476 | 329363 | 18888  | 5.5   | C_unshiu_00113 | 397010 | 415898 | 18889  | 4.35  | 99.98 |
| scaffold00240 | 336128 | 337852 | 1725   | 0.5   | C_unshiu_00113 | 419300 | 417576 | 1725   | 0.4   | 98.49 |
| scaffold00240 | 340174 | 343434 | 3261   | 0.95  | C_unshiu_00903 | 22909  | 19649  | 3261   | 2.8   | 99.97 |
| scaffold00242 | 15115  | 16848  | 1734   | 0.51  | C_unshiu_00095 | 451284 | 449551 | 1734   | 0.37  | 100   |
| scaffold00242 | 21815  | 32635  | 10821  | 3.15  | C_unshiu_01740 | 14095  | 3273   | 10823  | 21.2  | 99.95 |
| scaffold00242 | 32097  | 33319  | 1223   | 0.36  | C_unshiu_01740 | 3244   | 2022   | 1223   | 2.4   | 99.59 |
| scaffold00242 | 33320  | 35472  | 2153   | 0.63  | C_unshiu_00090 | 23999  | 21847  | 2153   | 0.46  | 100   |
| scaffold00242 | 36845  | 38497  | 1653   | 0.48  | C_unshiu_00631 | 66276  | 64624  | 1653   | 1.03  | 100   |
| scaffold00242 | 40070  | 47893  | 7824   | 2.28  | C_unshiu_00534 | 117397 | 109574 | 7824   | 4.29  | 99.88 |
| scaffold00242 | 47890  | 53507  | 5618   | 1.64  | C_unshiu_00449 | 21983  | 16366  | 5618   | 2.69  | 100   |
| scaffold00242 | 53508  | 55972  | 2465   | 0.72  | C_unshiu_00534 | 104790 | 102326 | 2465   | 1.35  | 100   |
| scaffold00242 | 56408  | 63317  | 6910   | 2.01  | C_unshiu_00534 | 101636 | 94728  | 6909   | 3.79  | 99.99 |
| scaffold00242 | 63621  | 67379  | 3759   | 1.1   | C_unshiu_00534 | 93965  | 90229  | 3737   | 2.05  | 99.18 |
| scaffold00242 | 69484  | 71915  | 2432   | 0.71  | C_unshiu_00534 | 87462  | 85031  | 2432   | 1.33  | 99.96 |
| scaffold00242 | 83460  | 97214  | 13755  | 4.01  | C_unshiu_01142 | 64484  | 78168  | 13685  | 14.92 | 98.77 |
| scaffold00242 | 98399  | 106897 | 8499   | 2.48  | C_unshiu_01142 | 78506  | 87004  | 8499   | 9.27  | 99.73 |

|               |        |        |       |      |                |        |        |       |       |       |
|---------------|--------|--------|-------|------|----------------|--------|--------|-------|-------|-------|
| scaffold00242 | 106890 | 108869 | 1980  | 0.58 | C_unshiu_01116 | 8457   | 10436  | 1980  | 2.1   | 100   |
| scaffold00242 | 110577 | 112651 | 2075  | 0.6  | C_unshiu_01142 | 89653  | 91726  | 2074  | 2.26  | 99.38 |
| scaffold00242 | 123540 | 127139 | 3600  | 1.05 | C_unshiu_00688 | 54891  | 58492  | 3602  | 2.46  | 99.53 |
| scaffold00242 | 132178 | 139164 | 6987  | 2.04 | C_unshiu_00688 | 62922  | 69882  | 6961  | 4.75  | 99.3  |
| scaffold00242 | 151887 | 167133 | 15247 | 4.44 | C_unshiu_00688 | 77847  | 93151  | 15305 | 10.44 | 98.39 |
| scaffold00242 | 169379 | 180495 | 11117 | 3.24 | C_unshiu_00688 | 97369  | 108542 | 11174 | 7.62  | 98.25 |
| scaffold00242 | 182304 | 190299 | 7996  | 2.33 | C_unshiu_02784 | 10170  | 18166  | 7997  | 43.93 | 99.71 |
| scaffold00242 | 196244 | 202378 | 6135  | 1.79 | C_unshiu_00688 | 115208 | 121351 | 6144  | 4.19  | 99.07 |
| scaffold00242 | 206387 | 208802 | 2416  | 0.7  | C_unshiu_00688 | 124011 | 126426 | 2416  | 1.65  | 99.96 |
| scaffold00242 | 208887 | 213554 | 4668  | 1.36 | C_unshiu_00688 | 126536 | 131202 | 4667  | 3.18  | 99.94 |
| scaffold00242 | 214123 | 216757 | 2635  | 0.77 | C_unshiu_00688 | 132132 | 134774 | 2643  | 1.8   | 99.13 |
| scaffold00242 | 225905 | 230427 | 4523  | 1.32 | C_unshiu_00188 | 94789  | 99299  | 4511  | 1.31  | 98.92 |
| scaffold00242 | 249852 | 253611 | 3760  | 1.1  | C_unshiu_00188 | 115690 | 119451 | 3762  | 1.09  | 99.39 |
| scaffold00242 | 253795 | 256336 | 2542  | 0.74 | C_unshiu_00188 | 120100 | 122628 | 2529  | 0.73  | 98.78 |
| scaffold00242 | 257084 | 259222 | 2139  | 0.62 | C_unshiu_00188 | 123710 | 125852 | 2143  | 0.62  | 98.27 |
| scaffold00242 | 261441 | 266722 | 5282  | 1.54 | C_unshiu_00188 | 129027 | 134308 | 5282  | 1.53  | 99.47 |
| scaffold00242 | 266714 | 268158 | 1445  | 0.42 | C_unshiu_00381 | 165245 | 163801 | 1445  | 0.63  | 100   |
| scaffold00242 | 268159 | 276294 | 8136  | 2.37 | C_unshiu_00188 | 136463 | 144602 | 8140  | 2.36  | 99.03 |
| scaffold00242 | 276570 | 282473 | 5904  | 1.72 | C_unshiu_01092 | 84442  | 90362  | 5921  | 6.11  | 98.9  |
| scaffold00242 | 282735 | 288011 | 5277  | 1.54 | C_unshiu_01092 | 91629  | 96909  | 5281  | 5.45  | 99.41 |
| scaffold00242 | 289047 | 293384 | 4338  | 1.26 | C_unshiu_00188 | 156927 | 161271 | 4345  | 1.26  | 98.99 |
| scaffold00242 | 294538 | 303281 | 8744  | 2.55 | C_unshiu_00188 | 162922 | 171665 | 8744  | 2.53  | 100   |
| scaffold00242 | 315960 | 317706 | 1747  | 0.51 | C_unshiu_00188 | 188009 | 189751 | 1743  | 0.51  | 98.63 |
| scaffold00242 | 318200 | 319209 | 1010  | 0.29 | C_unshiu_00188 | 186615 | 187624 | 1010  | 0.29  | 98.02 |
| scaffold00242 | 329726 | 336809 | 7084  | 2.07 | C_unshiu_00188 | 195306 | 202363 | 7058  | 2.05  | 98.17 |
| scaffold00242 | 336836 | 339631 | 2796  | 0.82 | C_unshiu_00836 | 4894   | 7686   | 2793  | 2.25  | 98.54 |
| scaffold00243 | 1      | 15507  | 15507 | 4.54 | C_unshiu_00256 | 119133 | 134689 | 15557 | 5.35  | 99.04 |
| scaffold00243 | 17116  | 34548  | 17433 | 5.1  | C_unshiu_00256 | 136871 | 154317 | 17447 | 6     | 99.9  |
| scaffold00243 | 36791  | 38862  | 2072  | 0.61 | C_unshiu_00256 | 157252 | 159323 | 2072  | 0.71  | 100   |
| scaffold00243 | 40602  | 51226  | 10625 | 3.11 | C_unshiu_00256 | 161365 | 171978 | 10614 | 3.65  | 99.47 |
| scaffold00243 | 57889  | 60388  | 2500  | 0.73 | C_unshiu_02271 | 22372  | 19874  | 2499  | 8.11  | 99.64 |
| scaffold00243 | 60395  | 61592  | 1198  | 0.35 | C_unshiu_02271 | 20009  | 18812  | 1198  | 3.89  | 99.92 |
| scaffold00243 | 65912  | 68160  | 2249  | 0.66 | C_unshiu_02271 | 15068  | 12818  | 2251  | 7.3   | 99.78 |
| scaffold00243 | 67704  | 74726  | 7023  | 2.05 | C_unshiu_02271 | 12813  | 5789   | 7025  | 22.78 | 99.5  |
| scaffold00243 | 74874  | 76762  | 1889  | 0.55 | C_unshiu_03087 | 7970   | 9858   | 1889  | 19.16 | 99.63 |
| scaffold00243 | 117067 | 118532 | 1466  | 0.43 | C_unshiu_00265 | 45641  | 44175  | 1467  | 0.52  | 99.52 |
| scaffold00243 | 124142 | 126204 | 2063  | 0.6  | C_unshiu_00265 | 44546  | 42485  | 2062  | 0.72  | 98.11 |
| scaffold00243 | 126424 | 127639 | 1216  | 0.36 | C_unshiu_01687 | 20831  | 19616  | 1216  | 2.29  | 100   |
| scaffold00243 | 136107 | 138140 | 2034  | 0.59 | C_unshiu_00265 | 36947  | 34914  | 2034  | 0.71  | 100   |
| scaffold00243 | 143311 | 146511 | 3201  | 0.94 | C_unshiu_00265 | 29183  | 25979  | 3205  | 1.13  | 99.41 |
| scaffold00243 | 146514 | 155108 | 8595  | 2.51 | C_unshiu_00265 | 24357  | 15750  | 8608  | 3.02  | 98.53 |
| scaffold00243 | 170716 | 178434 | 7719  | 2.26 | C_unshiu_01863 | 1      | 7723   | 7723  | 16.8  | 99.28 |
| scaffold00243 | 181705 | 184135 | 2431  | 0.71 | C_unshiu_01863 | 10310  | 12750  | 2441  | 5.31  | 99.43 |
| scaffold00243 | 273715 | 280162 | 6448  | 1.89 | C_unshiu_00531 | 132628 | 126160 | 6469  | 3.52  | 99.1  |
| scaffold00243 | 281722 | 286921 | 5200  | 1.52 | C_unshiu_00531 | 124800 | 119593 | 5208  | 2.83  | 99.23 |
| scaffold00243 | 292960 | 298752 | 5793  | 1.69 | C_unshiu_00531 | 113770 | 107969 | 5802  | 3.16  | 98.47 |
| scaffold00243 | 299954 | 301740 | 1787  | 0.52 | C_unshiu_00272 | 116443 | 118229 | 1787  | 0.64  | 99.94 |
| scaffold00243 | 336746 | 337930 | 1185  | 0.35 | C_unshiu_01444 | 23289  | 24464  | 1176  | 1.75  | 98.48 |
| scaffold00243 | 337922 | 340149 | 2228  | 0.65 | C_unshiu_00333 | 70388  | 68161  | 2228  | 0.89  | 100   |
| scaffold00243 | 340828 | 341888 | 1061  | 0.31 | C_unshiu_02158 | 16707  | 17767  | 1061  | 3.06  | 100   |
| scaffold00246 | 4943   | 13550  | 8608  | 2.54 | C_unshiu_00755 | 35051  | 43655  | 8605  | 6.35  | 99.93 |
| scaffold00246 | 15277  | 16307  | 1031  | 0.3  | C_unshiu_00755 | 45607  | 46637  | 1031  | 0.76  | 100   |
| scaffold00246 | 19828  | 34119  | 14292 | 4.21 | C_unshiu_00755 | 51769  | 66060  | 14292 | 10.55 | 99.97 |
| scaffold00246 | 34130  | 49750  | 15621 | 4.6  | C_unshiu_00755 | 66380  | 81999  | 15620 | 11.53 | 99.94 |
| scaffold00246 | 50945  | 67426  | 16482 | 4.85 | C_unshiu_00755 | 82626  | 99073  | 16448 | 12.15 | 99.48 |
| scaffold00246 | 66056  | 72292  | 6237  | 1.84 | C_unshiu_00755 | 103081 | 109318 | 6238  | 4.61  | 98.96 |
| scaffold00246 | 74044  | 76336  | 2293  | 0.68 | C_unshiu_00755 | 108586 | 110885 | 2300  | 1.7   | 98.22 |
| scaffold00246 | 116829 | 126560 | 9732  | 2.87 | C_unshiu_00221 | 309471 | 299740 | 9732  | 3.1   | 99.95 |
| scaffold00246 | 130415 | 131606 | 1192  | 0.35 | C_unshiu_00221 | 294778 | 293587 | 1192  | 0.38  | 100   |
| scaffold00246 | 148520 | 151134 | 2615  | 0.77 | C_unshiu_01138 | 78667  | 76050  | 2618  | 2.84  | 98.4  |
| scaffold00246 | 154733 | 164415 | 9683  | 2.85 | C_unshiu_01138 | 73252  | 63539  | 9714  | 10.54 | 98.47 |
| scaffold00246 | 164856 | 166328 | 1473  | 0.43 | C_unshiu_01138 | 62671  | 61197  | 1475  | 1.6   | 99.46 |
| scaffold00246 | 180079 | 184307 | 4229  | 1.25 | C_unshiu_01138 | 47308  | 43073  | 4236  | 4.59  | 98.58 |
| scaffold00246 | 188187 | 199375 | 11189 | 3.3  | C_unshiu_01612 | 1      | 11191  | 11191 | 19.63 | 99.88 |
| scaffold00246 | 202302 | 214506 | 12205 | 3.59 | C_unshiu_01612 | 15427  | 27631  | 12205 | 21.41 | 99.87 |
| scaffold00246 | 215100 | 219401 | 4302  | 1.27 | C_unshiu_01612 | 28860  | 33161  | 4302  | 7.55  | 99.95 |
| scaffold00246 | 221559 | 243398 | 21840 | 6.43 | C_unshiu_01288 | 2029   | 23856  | 21828 | 27.89 | 98.77 |
| scaffold00246 | 246129 | 261923 | 15795 | 4.65 | C_unshiu_01288 | 25475  | 41233  | 15759 | 20.14 | 98.86 |
| scaffold00246 | 261938 | 271292 | 9355  | 2.76 | C_unshiu_01288 | 42082  | 51444  | 9363  | 11.96 | 99.37 |
| scaffold00246 | 272720 | 276886 | 4167  | 1.23 | C_unshiu_01288 | 57963  | 62122  | 4160  | 5.32  | 98.66 |
| scaffold00246 | 276902 | 289229 | 12328 | 3.63 | C_unshiu_01288 | 62821  | 75193  | 12373 | 15.81 | 98.06 |
| scaffold00246 | 291229 | 292828 | 1600  | 0.47 | C_unshiu_00642 | 4203   | 5804   | 1602  | 1.01  | 98.88 |
| scaffold00246 | 296474 | 300470 | 3997  | 1.18 | C_unshiu_00642 | 8131   | 12126  | 3996  | 2.52  | 98.77 |
| scaffold00246 | 302403 | 304599 | 2197  | 0.65 | C_unshiu_00642 | 6190   | 8362   | 2173  | 1.37  | 98.59 |
| scaffold00246 | 307282 | 309742 | 2461  | 0.72 | C_unshiu_00016 | 19724  | 22185  | 2462  | 0.28  | 99.55 |
| scaffold00246 | 311255 | 313206 | 1952  | 0.57 | C_unshiu_00642 | 12056  | 13997  | 1942  | 1.23  | 98.98 |
| scaffold00246 | 313862 | 321079 | 7218  | 2.13 | C_unshiu_00642 | 15071  | 22262  | 7192  | 4.54  | 98.26 |
| scaffold00247 | 12150  | 13921  | 1772  | 0.52 | C_unshiu_00800 | 128126 | 126362 | 1765  | 1.37  | 98.93 |
| scaffold00247 | 15635  | 19655  | 4021  | 1.18 | C_unshiu_00800 | 124077 | 120057 | 4021  | 3.13  | 99.98 |

|               |        |        |       |       |                |        |        |       |       |       |
|---------------|--------|--------|-------|-------|----------------|--------|--------|-------|-------|-------|
| scaffold00247 | 20674  | 67134  | 46461 | 13.69 | C_unshiu_00800 | 118254 | 71782  | 46473 | 36.2  | 99.88 |
| scaffold00247 | 67132  | 75509  | 8378  | 2.47  | C_unshiu_00800 | 71749  | 63370  | 8380  | 6.53  | 99.92 |
| scaffold00247 | 77756  | 86951  | 9196  | 2.71  | C_unshiu_00800 | 62372  | 53180  | 9193  | 7.16  | 99.88 |
| scaffold00247 | 95896  | 98153  | 2258  | 0.67  | C_unshiu_00800 | 45999  | 43743  | 2257  | 1.76  | 99.78 |
| scaffold00247 | 98269  | 105376 | 7108  | 2.09  | C_unshiu_00800 | 43432  | 36325  | 7108  | 5.54  | 99.97 |
| scaffold00247 | 105386 | 114321 | 8936  | 2.63  | C_unshiu_00800 | 36004  | 27069  | 8936  | 6.96  | 99.99 |
| scaffold00247 | 118362 | 125933 | 7572  | 2.23  | C_unshiu_00800 | 23617  | 16043  | 7575  | 5.9   | 99.95 |
| scaffold00247 | 126479 | 139031 | 12553 | 3.7   | C_unshiu_00800 | 14033  | 1479   | 12555 | 9.78  | 99.95 |
| scaffold00247 | 139021 | 140499 | 1479  | 0.44  | C_unshiu_00800 | 1      | 1478   | 1478  | 1.15  | 99.86 |
| scaffold00247 | 149849 | 189385 | 39537 | 11.65 | C_unshiu_00797 | 126936 | 87382  | 39555 | 30.75 | 99.74 |
| scaffold00247 | 193324 | 211831 | 18508 | 5.45  | C_unshiu_00797 | 78565  | 60056  | 18510 | 14.39 | 99.94 |
| scaffold00247 | 211853 | 243287 | 31435 | 9.26  | C_unshiu_00797 | 59803  | 28361  | 31443 | 24.45 | 99.81 |
| scaffold00247 | 244675 | 263233 | 18559 | 5.47  | C_unshiu_00797 | 26319  | 7760   | 18560 | 14.43 | 99.88 |
| scaffold00247 | 265209 | 271028 | 5820  | 1.72  | C_unshiu_00797 | 7142   | 1323   | 5820  | 4.53  | 99.81 |
| scaffold00247 | 275388 | 277148 | 1761  | 0.52  | C_unshiu_00943 | 55737  | 57497  | 1761  | 1.57  | 100   |
| scaffold00247 | 277138 | 279984 | 2847  | 0.84  | C_unshiu_00899 | 21899  | 24751  | 2853  | 2.44  | 99.72 |
| scaffold00247 | 280011 | 288354 | 8344  | 2.46  | C_unshiu_00899 | 24707  | 33010  | 8304  | 7.09  | 99.03 |
| scaffold00247 | 289196 | 291595 | 2400  | 0.71  | C_unshiu_02544 | 12801  | 10400  | 2402  | 10.24 | 99.67 |
| scaffold00247 | 293531 | 299849 | 6319  | 1.86  | C_unshiu_00678 | 6371   | 12689  | 6319  | 4.24  | 99.92 |
| scaffold00247 | 300434 | 302295 | 1862  | 0.55  | C_unshiu_00678 | 13683  | 15545  | 1863  | 1.25  | 99.62 |
| scaffold00247 | 302329 | 306576 | 4248  | 1.25  | C_unshiu_00678 | 15446  | 19678  | 4233  | 2.84  | 98.47 |
| scaffold00247 | 306630 | 319177 | 12548 | 3.7   | C_unshiu_00678 | 19676  | 32157  | 12482 | 8.38  | 99.05 |
| scaffold00247 | 334742 | 337910 | 3169  | 0.93  | C_unshiu_00678 | 47114  | 50283  | 3170  | 2.13  | 98.58 |
| scaffold00250 | 7619   | 14068  | 6450  | 1.92  | C_unshiu_00040 | 1      | 6420   | 6420  | 0.97  | 99.47 |
| scaffold00250 | 18798  | 70892  | 52095 | 15.49 | C_unshiu_00040 | 11458  | 63576  | 52119 | 7.91  | 99.8  |
| scaffold00250 | 70502  | 75310  | 4809  | 1.43  | C_unshiu_00040 | 68213  | 73024  | 4812  | 0.73  | 99.77 |
| scaffold00250 | 75632  | 77900  | 2269  | 0.67  | C_unshiu_00040 | 83840  | 86119  | 2280  | 0.35  | 99.47 |
| scaffold00250 | 78416  | 154415 | 76000 | 22.59 | C_unshiu_00040 | 86551  | 162468 | 75918 | 11.52 | 99.73 |
| scaffold00250 | 154835 | 160572 | 5738  | 1.71  | C_unshiu_00040 | 162627 | 168365 | 5739  | 0.87  | 99.79 |
| scaffold00250 | 160492 | 198430 | 37939 | 11.28 | C_unshiu_00040 | 168325 | 206253 | 37929 | 5.75  | 99.66 |
| scaffold00250 | 205761 | 206956 | 1196  | 0.36  | C_unshiu_00040 | 213092 | 214288 | 1197  | 0.18  | 98.91 |
| scaffold00250 | 207332 | 214761 | 7430  | 2.21  | C_unshiu_00040 | 215170 | 222598 | 7429  | 1.13  | 99.6  |
| scaffold00250 | 214599 | 241968 | 27370 | 8.14  | C_unshiu_00040 | 222596 | 249959 | 27364 | 4.15  | 99.92 |
| scaffold00250 | 244531 | 274051 | 29521 | 8.78  | C_unshiu_00040 | 252336 | 281876 | 29541 | 4.48  | 99.67 |
| scaffold00250 | 276547 | 285633 | 9087  | 2.7   | C_unshiu_00040 | 285058 | 294142 | 9085  | 1.38  | 99.52 |
| scaffold00250 | 285816 | 313142 | 27327 | 8.12  | C_unshiu_00040 | 294144 | 321540 | 27397 | 4.16  | 98.79 |
| scaffold00250 | 312087 | 321303 | 9217  | 2.74  | C_unshiu_01301 | 1      | 9216   | 9216  | 11.91 | 99.99 |
| scaffold00250 | 321427 | 326776 | 5350  | 1.59  | C_unshiu_01301 | 9531   | 14870  | 5340  | 6.9   | 99.81 |
| scaffold00251 | 5956   | 7516   | 1561  | 0.46  | C_unshiu_00279 | 48102  | 46543  | 1560  | 0.56  | 99.55 |
| scaffold00251 | 9718   | 12371  | 2654  | 0.79  | C_unshiu_00279 | 45849  | 43202  | 2648  | 0.95  | 99.74 |
| scaffold00251 | 14075  | 19508  | 5434  | 1.62  | C_unshiu_00279 | 42725  | 37258  | 5468  | 1.97  | 98.67 |
| scaffold00251 | 45415  | 70420  | 25006 | 7.44  | C_unshiu_00629 | 1      | 25052  | 25052 | 15.57 | 99.55 |
| scaffold00251 | 76909  | 93545  | 16637 | 4.95  | C_unshiu_00629 | 31125  | 47803  | 16679 | 10.37 | 99.29 |
| scaffold00251 | 107862 | 122267 | 14406 | 4.28  | C_unshiu_00629 | 57356  | 71787  | 14432 | 8.97  | 99.23 |
| scaffold00251 | 139350 | 141886 | 2537  | 0.75  | C_unshiu_02538 | 8406   | 10933  | 2528  | 10.72 | 99.05 |
| scaffold00251 | 152181 | 155244 | 3064  | 0.91  | C_unshiu_00019 | 791423 | 794486 | 3064  | 0.36  | 100   |
| scaffold00251 | 156362 | 162714 | 6353  | 1.89  | C_unshiu_01555 | 30021  | 23640  | 6382  | 10.59 | 98.53 |
| scaffold00251 | 162705 | 165995 | 3291  | 0.98  | C_unshiu_01555 | 23072  | 19784  | 3289  | 5.46  | 98.73 |
| scaffold00251 | 166208 | 168276 | 2069  | 0.62  | C_unshiu_01555 | 17398  | 15327  | 2072  | 3.44  | 99.37 |
| scaffold00251 | 168269 | 170115 | 1847  | 0.55  | C_unshiu_00245 | 132305 | 134151 | 1847  | 0.62  | 99.95 |
| scaffold00251 | 170116 | 172195 | 2080  | 0.62  | C_unshiu_01555 | 12996  | 10917  | 2080  | 3.45  | 99.9  |
| scaffold00251 | 173385 | 183928 | 10544 | 3.14  | C_unshiu_01555 | 10502  | 1      | 10502 | 17.42 | 98.91 |
| scaffold00251 | 197925 | 207394 | 9470  | 2.82  | C_unshiu_01740 | 25203  | 15768  | 9436  | 18.48 | 98.83 |
| scaffold00251 | 210356 | 221428 | 11073 | 3.29  | C_unshiu_00912 | 85110  | 96123  | 11014 | 9.51  | 98.06 |
| scaffold00251 | 233500 | 237992 | 4493  | 1.34  | C_unshiu_00912 | 96450  | 100952 | 4503  | 3.89  | 99.22 |
| scaffold00251 | 249708 | 254737 | 5030  | 1.5   | C_unshiu_00912 | 110515 | 115575 | 5061  | 4.37  | 98.06 |
| scaffold00251 | 257403 | 269694 | 12292 | 3.66  | C_unshiu_00699 | 2152   | 14460  | 12309 | 8.56  | 99.07 |
| scaffold00251 | 293345 | 312255 | 18911 | 5.62  | C_unshiu_00285 | 89269  | 70359  | 18911 | 6.9   | 99.94 |
| scaffold00251 | 316050 | 318235 | 2186  | 0.65  | C_unshiu_00285 | 67748  | 65563  | 2186  | 0.8   | 99.13 |
| scaffold00251 | 318228 | 325279 | 7052  | 2.1   | C_unshiu_00285 | 64871  | 57817  | 7055  | 2.57  | 99.66 |
| scaffold00251 | 325650 | 326866 | 1217  | 0.36  | C_unshiu_00695 | 104708 | 103491 | 1218  | 0.84  | 98.85 |
| scaffold00252 | 1      | 3128   | 3128  | 0.93  | C_unshiu_00912 | 70114  | 66987  | 3128  | 2.7   | 100   |
| scaffold00252 | 12632  | 28761  | 16130 | 4.82  | C_unshiu_00640 | 115781 | 99635  | 16147 | 10.2  | 98.34 |
| scaffold00252 | 28758  | 43073  | 14316 | 4.27  | C_unshiu_00640 | 99564  | 85293  | 14272 | 9.01  | 98.76 |
| scaffold00252 | 46141  | 55542  | 9402  | 2.81  | C_unshiu_02375 | 6007   | 15411  | 9405  | 33.86 | 99.87 |
| scaffold00252 | 59941  | 62502  | 2562  | 0.76  | C_unshiu_02375 | 22724  | 25285  | 2562  | 9.22  | 99.92 |
| scaffold00252 | 87282  | 94166  | 6885  | 2.06  | C_unshiu_00640 | 75095  | 68192  | 6904  | 4.36  | 98.63 |
| scaffold00252 | 101287 | 103078 | 1792  | 0.53  | C_unshiu_00640 | 60544  | 58753  | 1792  | 1.13  | 99.5  |
| scaffold00252 | 101713 | 112615 | 10903 | 3.25  | C_unshiu_00640 | 59930  | 49029  | 10902 | 6.89  | 98.37 |
| scaffold00252 | 133628 | 142757 | 9130  | 2.73  | C_unshiu_01503 | 16780  | 7616   | 9165  | 14.53 | 99.21 |
| scaffold00252 | 143668 | 145186 | 1519  | 0.45  | C_unshiu_01133 | 16577  | 15066  | 1512  | 1.63  | 99.28 |
| scaffold00252 | 145344 | 146541 | 1198  | 0.36  | C_unshiu_01503 | 2760   | 1566   | 1195  | 1.89  | 99.17 |
| scaffold00252 | 145409 | 147148 | 1740  | 0.52  | C_unshiu_01133 | 11006  | 9266   | 1741  | 1.88  | 99.74 |
| scaffold00252 | 147458 | 150684 | 3227  | 0.96  | C_unshiu_01133 | 12540  | 9275   | 3266  | 3.53  | 98.32 |
| scaffold00252 | 150940 | 156893 | 5954  | 1.78  | C_unshiu_00746 | 63299  | 57341  | 5959  | 4.36  | 98.35 |
| scaffold00252 | 157849 | 165475 | 7627  | 2.28  | C_unshiu_00746 | 55851  | 48225  | 7627  | 5.58  | 100   |
| scaffold00252 | 166085 | 168127 | 2043  | 0.61  | C_unshiu_00746 | 47183  | 45140  | 2044  | 1.49  | 99.17 |
| scaffold00252 | 181543 | 200013 | 18471 | 5.51  | C_unshiu_01533 | 35485  | 17023  | 18463 | 30    | 99.46 |
| scaffold00252 | 206655 | 212878 | 6224  | 1.86  | C_unshiu_01533 | 10316  | 4093   | 6224  | 10.11 | 99.98 |

|               |        |        |       |       |                |        |        |       |       |       |
|---------------|--------|--------|-------|-------|----------------|--------|--------|-------|-------|-------|
| scaffold00252 | 213464 | 215758 | 2295  | 0.69  | C_unshiu_01533 | 3053   | 759    | 2295  | 3.73  | 100   |
| scaffold00252 | 217136 | 219911 | 2776  | 0.83  | C_unshiu_00905 | 2068   | 4843   | 2776  | 2.38  | 100   |
| scaffold00252 | 221154 | 230976 | 9823  | 2.93  | C_unshiu_00905 | 6297   | 16073  | 9777  | 8.4   | 98.1  |
| scaffold00252 | 232596 | 244362 | 11767 | 3.51  | C_unshiu_00905 | 18010  | 29826  | 11817 | 10.15 | 98.57 |
| scaffold00252 | 248627 | 250103 | 1477  | 0.44  | C_unshiu_00905 | 33774  | 35250  | 1477  | 1.27  | 99.73 |
| scaffold00252 | 249896 | 252428 | 2533  | 0.76  | C_unshiu_00905 | 35106  | 37638  | 2533  | 2.18  | 99.8  |
| scaffold00252 | 252811 | 255785 | 2975  | 0.89  | C_unshiu_02769 | 9273   | 6300   | 2974  | 15.99 | 99.29 |
| scaffold00252 | 254888 | 256021 | 1134  | 0.34  | C_unshiu_00266 | 3011   | 4143   | 1133  | 0.4   | 99.82 |
| scaffold00252 | 256306 | 257758 | 1453  | 0.43  | C_unshiu_00905 | 41584  | 43037  | 1454  | 1.25  | 99.86 |
| scaffold00252 | 258154 | 261470 | 3317  | 0.99  | C_unshiu_00905 | 44143  | 47468  | 3326  | 2.86  | 99.16 |
| scaffold00252 | 275123 | 276447 | 1325  | 0.4   | C_unshiu_00266 | 24750  | 26074  | 1325  | 0.47  | 100   |
| scaffold00252 | 291252 | 292941 | 1690  | 0.5   | C_unshiu_00941 | 110613 | 112304 | 1692  | 1.51  | 99.59 |
| scaffold00252 | 296450 | 312040 | 15591 | 4.65  | C_unshiu_00941 | 105974 | 90385  | 15590 | 13.88 | 99.96 |
| scaffold00252 | 316352 | 320520 | 4169  | 1.24  | C_unshiu_00941 | 86709  | 82518  | 4192  | 3.73  | 98.02 |
| scaffold00254 | 846    | 2213   | 1368  | 0.41  | C_unshiu_00835 | 49410  | 50777  | 1368  | 1.1   | 100   |
| scaffold00254 | 2671   | 3708   | 1038  | 0.31  | C_unshiu_03134 | 1525   | 2568   | 1044  | 15.4  | 98.47 |
| scaffold00254 | 2902   | 12834  | 9933  | 2.99  | C_unshiu_00555 | 176931 | 167041 | 9891  | 5.59  | 99.25 |
| scaffold00254 | 17967  | 20440  | 2474  | 0.75  | C_unshiu_00245 | 106622 | 109095 | 2474  | 0.83  | 100   |
| scaffold00254 | 20433  | 22849  | 2417  | 0.73  | C_unshiu_00555 | 159371 | 156955 | 2417  | 1.37  | 100   |
| scaffold00254 | 22930  | 28675  | 5746  | 1.73  | C_unshiu_00555 | 156854 | 151159 | 5696  | 3.22  | 98.61 |
| scaffold00254 | 29397  | 30661  | 1265  | 0.38  | C_unshiu_00555 | 150714 | 149452 | 1263  | 0.71  | 98.58 |
| scaffold00254 | 31240  | 41695  | 10456 | 3.15  | C_unshiu_00555 | 148582 | 138142 | 10441 | 5.9   | 99.53 |
| scaffold00254 | 45383  | 46762  | 1380  | 0.42  | C_unshiu_01461 | 28180  | 26800  | 1381  | 2.1   | 99.93 |
| scaffold00254 | 71037  | 80765  | 9729  | 2.93  | C_unshiu_02402 | 14132  | 23865  | 9734  | 35.76 | 98.79 |
| scaffold00254 | 85630  | 92767  | 7138  | 2.15  | C_unshiu_00278 | 11530  | 18696  | 7167  | 2.58  | 98.35 |
| scaffold00254 | 101941 | 104437 | 2497  | 0.75  | C_unshiu_01043 | 98874  | 101368 | 2495  | 2.46  | 98.92 |
| scaffold00254 | 120713 | 128212 | 7500  | 2.26  | C_unshiu_00396 | 163018 | 170520 | 7503  | 3.36  | 99.31 |
| scaffold00254 | 129762 | 145851 | 16090 | 4.85  | C_unshiu_00396 | 172867 | 188931 | 16065 | 7.19  | 98.66 |
| scaffold00254 | 149961 | 158848 | 8888  | 2.68  | C_unshiu_00396 | 188924 | 197839 | 8916  | 3.99  | 98.79 |
| scaffold00254 | 166080 | 170524 | 4445  | 1.34  | C_unshiu_01030 | 53477  | 57923  | 4447  | 4.32  | 99.6  |
| scaffold00254 | 170516 | 173393 | 2878  | 0.87  | C_unshiu_00485 | 69240  | 72117  | 2878  | 1.46  | 100   |
| scaffold00254 | 177249 | 182260 | 5012  | 1.51  | C_unshiu_00396 | 213116 | 218073 | 4958  | 2.22  | 98.15 |
| scaffold00254 | 184108 | 191565 | 7458  | 2.25  | C_unshiu_01030 | 59409  | 66899  | 7491  | 7.27  | 98.88 |
| scaffold00254 | 213850 | 215071 | 1222  | 0.37  | C_unshiu_01030 | 86576  | 87797  | 1222  | 1.19  | 100   |
| scaffold00254 | 215390 | 220566 | 5177  | 1.56  | C_unshiu_01030 | 88627  | 93787  | 5161  | 5.01  | 99.05 |
| scaffold00254 | 221383 | 227811 | 6429  | 1.94  | C_unshiu_01030 | 95090  | 101518 | 6429  | 6.24  | 99.89 |
| scaffold00254 | 227803 | 229250 | 1448  | 0.44  | C_unshiu_00555 | 129830 | 131277 | 1448  | 0.82  | 100   |
| scaffold00254 | 237602 | 238944 | 1343  | 0.4   | C_unshiu_02094 | 26980  | 25638  | 1343  | 3.65  | 99.93 |
| scaffold00254 | 239045 | 242093 | 3049  | 0.92  | C_unshiu_02094 | 25539  | 22491  | 3049  | 8.28  | 100   |
| scaffold00254 | 242670 | 243855 | 1186  | 0.36  | C_unshiu_00118 | 383719 | 384904 | 1186  | 0.28  | 98.15 |
| scaffold00254 | 244825 | 250037 | 5213  | 1.57  | C_unshiu_02094 | 19882  | 14677  | 5206  | 14.15 | 98.13 |
| scaffold00254 | 252176 | 256219 | 4044  | 1.22  | C_unshiu_01212 | 28778  | 24744  | 4035  | 4.79  | 99.01 |
| scaffold00254 | 256212 | 260256 | 4045  | 1.22  | C_unshiu_01212 | 24119  | 20046  | 4074  | 4.84  | 98.04 |
| scaffold00254 | 262647 | 264083 | 1437  | 0.43  | C_unshiu_01212 | 19099  | 17662  | 1438  | 1.71  | 99.72 |
| scaffold00254 | 269040 | 270379 | 1340  | 0.4   | C_unshiu_00324 | 88370  | 89709  | 1340  | 0.53  | 100   |
| scaffold00254 | 270373 | 271938 | 1566  | 0.47  | C_unshiu_01212 | 10630  | 9065   | 1566  | 1.86  | 100   |
| scaffold00254 | 274325 | 276485 | 2161  | 0.65  | C_unshiu_00472 | 64669  | 62508  | 2162  | 1.08  | 98.94 |
| scaffold00254 | 277684 | 279098 | 1415  | 0.43  | C_unshiu_00472 | 61291  | 59884  | 1408  | 0.7   | 99.29 |
| scaffold00254 | 281402 | 282464 | 1063  | 0.32  | C_unshiu_00449 | 14123  | 13062  | 1062  | 0.51  | 99.81 |
| scaffold00254 | 283106 | 284248 | 1143  | 0.34  | C_unshiu_00267 | 59016  | 60158  | 1143  | 0.4   | 100   |
| scaffold00254 | 284330 | 293382 | 9053  | 2.73  | C_unshiu_00449 | 10842  | 1799   | 9044  | 4.34  | 98.98 |
| scaffold00254 | 293383 | 300364 | 6982  | 2.1   | C_unshiu_01062 | 54232  | 47251  | 6982  | 7.05  | 100   |
| scaffold00254 | 300524 | 302840 | 2317  | 0.7   | C_unshiu_01212 | 12442  | 10121  | 2322  | 2.76  | 98.02 |
| scaffold00254 | 303166 | 312459 | 9294  | 2.8   | C_unshiu_02711 | 1      | 9293   | 9293  | 47.2  | 99.99 |
| scaffold00254 | 312489 | 318207 | 5719  | 1.72  | C_unshiu_02711 | 9526   | 15244  | 5719  | 29.05 | 99.51 |
| scaffold00254 | 320169 | 321385 | 1217  | 0.37  | C_unshiu_00649 | 24549  | 25766  | 1218  | 0.78  | 98.36 |
| scaffold00254 | 320252 | 321416 | 1165  | 0.35  | C_unshiu_00684 | 141532 | 142696 | 1165  | 0.79  | 98.88 |
| scaffold00255 | 730    | 2581   | 1852  | 0.56  | C_unshiu_00898 | 98800  | 100648 | 1849  | 1.58  | 98.22 |
| scaffold00255 | 2597   | 4869   | 2273  | 0.69  | C_unshiu_00568 | 36658  | 38930  | 2273  | 1.3   | 100   |
| scaffold00255 | 9027   | 17868  | 8842  | 2.68  | C_unshiu_01005 | 92807  | 101630 | 8824  | 8.39  | 99.02 |
| scaffold00255 | 12241  | 35315  | 23075 | 7     | C_unshiu_00177 | 240177 | 263230 | 23054 | 6.38  | 98.71 |
| scaffold00255 | 48995  | 67967  | 18973 | 5.76  | C_unshiu_00177 | 279047 | 298116 | 19070 | 5.28  | 98.28 |
| scaffold00255 | 101901 | 136318 | 34418 | 10.44 | C_unshiu_00872 | 27     | 34465  | 34439 | 28.69 | 98.35 |
| scaffold00255 | 138189 | 143523 | 5335  | 1.62  | C_unshiu_00872 | 34466  | 39808  | 5343  | 4.45  | 98.17 |
| scaffold00255 | 145089 | 148909 | 3821  | 1.16  | C_unshiu_00872 | 40787  | 44618  | 3832  | 3.19  | 99.71 |
| scaffold00255 | 149926 | 151263 | 1338  | 0.41  | C_unshiu_01807 | 40043  | 41384  | 1342  | 2.78  | 99.4  |
| scaffold00255 | 151263 | 153484 | 2222  | 0.67  | C_unshiu_01807 | 40048  | 37830  | 2219  | 4.6   | 99.32 |
| scaffold00255 | 166833 | 181889 | 15057 | 4.57  | C_unshiu_01807 | 18696  | 3587   | 15110 | 31.32 | 98.47 |
| scaffold00255 | 175946 | 181991 | 6046  | 1.83  | C_unshiu_02901 | 9698   | 15722  | 6025  | 38.32 | 98.91 |
| scaffold00255 | 187688 | 229062 | 41375 | 12.55 | C_unshiu_01335 | 74980  | 33723  | 41258 | 55.02 | 98.38 |
| scaffold00255 | 230636 | 269091 | 38456 | 11.67 | C_unshiu_01563 | 14424  | 52895  | 38472 | 64.57 | 99.51 |
| scaffold00255 | 274411 | 276384 | 1974  | 0.6   | C_unshiu_01563 | 57488  | 59461  | 1974  | 3.31  | 99.9  |
| scaffold00255 | 286117 | 298681 | 12565 | 3.81  | C_unshiu_01335 | 25466  | 12850  | 12617 | 16.83 | 98.05 |
| scaffold00255 | 304386 | 308930 | 4545  | 1.38  | C_unshiu_03056 | 10196  | 5652   | 4545  | 40.37 | 98.31 |
| scaffold00255 | 321417 | 324399 | 2983  | 0.9   | C_unshiu_00872 | 119337 | 116333 | 3005  | 2.5   | 98.04 |
| scaffold00256 | 10606  | 14298  | 3693  | 1.12  | C_unshiu_01872 | 5239   | 8911   | 3673  | 8.03  | 98.27 |
| scaffold00256 | 20560  | 25234  | 4675  | 1.42  | C_unshiu_00017 | 223887 | 219213 | 4675  | 0.55  | 100   |
| scaffold00256 | 25733  | 32207  | 6475  | 1.97  | C_unshiu_01872 | 21387  | 27880  | 6494  | 14.2  | 98.94 |
| scaffold00256 | 47565  | 51002  | 3438  | 1.05  | C_unshiu_01872 | 38221  | 41659  | 3439  | 7.52  | 99.45 |

|               |        |        |       |       |                |        |        |       |       |       |
|---------------|--------|--------|-------|-------|----------------|--------|--------|-------|-------|-------|
| scaffold00256 | 51873  | 53038  | 1166  | 0.35  | C_unshiu_00587 | 169393 | 168228 | 1166  | 0.69  | 98.2  |
| scaffold00256 | 72914  | 76269  | 3356  | 1.02  | C_unshiu_00276 | 38779  | 42134  | 3356  | 1.21  | 100   |
| scaffold00256 | 77523  | 83602  | 6080  | 1.85  | C_unshiu_00587 | 145607 | 139511 | 6097  | 3.58  | 99.43 |
| scaffold00256 | 92432  | 93751  | 1320  | 0.4   | C_unshiu_00964 | 31078  | 29759  | 1320  | 1.2   | 100   |
| scaffold00256 | 101165 | 113115 | 11951 | 3.64  | C_unshiu_00587 | 133167 | 121240 | 11928 | 7.01  | 98.35 |
| scaffold00256 | 113739 | 120745 | 7007  | 2.13  | C_unshiu_00587 | 120832 | 113803 | 7030  | 4.13  | 98.79 |
| scaffold00256 | 121272 | 122343 | 1072  | 0.33  | C_unshiu_00587 | 113044 | 111976 | 1069  | 0.63  | 98.79 |
| scaffold00256 | 124980 | 141100 | 16121 | 4.91  | C_unshiu_00587 | 110361 | 94187  | 16175 | 9.51  | 98.93 |
| scaffold00256 | 159760 | 161572 | 1813  | 0.55  | C_unshiu_00587 | 74367  | 72552  | 1816  | 1.07  | 98.19 |
| scaffold00256 | 190827 | 193823 | 2997  | 0.91  | C_unshiu_00587 | 41328  | 38332  | 2997  | 1.76  | 99.93 |
| scaffold00256 | 198577 | 207503 | 8927  | 2.72  | C_unshiu_00587 | 33068  | 24145  | 8924  | 5.24  | 98.99 |
| scaffold00256 | 208390 | 211603 | 3214  | 0.98  | C_unshiu_00587 | 22635  | 19425  | 3211  | 1.89  | 99.41 |
| scaffold00256 | 214621 | 218878 | 4258  | 1.3   | C_unshiu_00425 | 188250 | 183989 | 4262  | 1.96  | 99.32 |
| scaffold00256 | 219326 | 227690 | 8365  | 2.55  | C_unshiu_00587 | 13450  | 5051   | 8400  | 4.94  | 99.01 |
| scaffold00256 | 239387 | 247111 | 7725  | 2.35  | C_unshiu_00425 | 172617 | 164866 | 7752  | 3.57  | 99.02 |
| scaffold00256 | 265329 | 277757 | 12429 | 3.78  | C_unshiu_00425 | 153260 | 140780 | 12481 | 5.75  | 98.46 |
| scaffold00256 | 277748 | 289269 | 11522 | 3.51  | C_unshiu_00425 | 139045 | 127545 | 11501 | 5.29  | 98.24 |
| scaffold00256 | 289941 | 299330 | 9390  | 2.86  | C_unshiu_00425 | 124368 | 114898 | 9471  | 4.36  | 98.02 |
| scaffold00256 | 299199 | 301894 | 2696  | 0.82  | C_unshiu_00425 | 114899 | 112202 | 2698  | 1.24  | 99.81 |
| scaffold00256 | 301956 | 316281 | 14326 | 4.36  | C_unshiu_00425 | 111970 | 97602  | 14369 | 6.61  | 98.6  |
| scaffold00256 | 324531 | 325910 | 1380  | 0.42  | C_unshiu_00425 | 89683  | 88301  | 1383  | 0.64  | 98.48 |
| scaffold00256 | 326926 | 328650 | 1725  | 0.52  | C_unshiu_00425 | 86856  | 85121  | 1736  | 0.8   | 98.39 |
| scaffold00258 | 1      | 4278   | 4278  | 1.31  | C_unshiu_00115 | 359877 | 364135 | 4259  | 0.98  | 99.14 |
| scaffold00258 | 5623   | 7237   | 1615  | 0.49  | C_unshiu_00062 | 61153  | 62766  | 1614  | 0.29  | 98.21 |
| scaffold00258 | 12656  | 15542  | 2887  | 0.88  | C_unshiu_00115 | 372272 | 375159 | 2888  | 0.67  | 99.76 |
| scaffold00258 | 26084  | 28527  | 2444  | 0.75  | C_unshiu_00115 | 382658 | 385104 | 2447  | 0.57  | 99.31 |
| scaffold00258 | 33628  | 38887  | 5260  | 1.61  | C_unshiu_00115 | 385801 | 391067 | 5267  | 1.22  | 99.72 |
| scaffold00258 | 40349  | 47829  | 7481  | 2.29  | C_unshiu_00115 | 391387 | 398901 | 7515  | 1.74  | 98.15 |
| scaffold00258 | 50910  | 53294  | 2385  | 0.73  | C_unshiu_01621 | 40090  | 42474  | 2385  | 4.22  | 98.62 |
| scaffold00258 | 53376  | 54848  | 1473  | 0.45  | C_unshiu_01621 | 42598  | 44072  | 1475  | 2.61  | 98.92 |
| scaffold00258 | 54846  | 71650  | 16805 | 5.14  | C_unshiu_00115 | 399330 | 416191 | 16862 | 3.9   | 99.44 |
| scaffold00258 | 73352  | 83314  | 9963  | 3.05  | C_unshiu_00115 | 416586 | 426550 | 9965  | 2.3   | 99.88 |
| scaffold00258 | 83844  | 86579  | 2736  | 0.84  | C_unshiu_00115 | 426543 | 429284 | 2742  | 0.63  | 99.64 |
| scaffold00258 | 87986  | 91291  | 3306  | 1.01  | C_unshiu_00115 | 429268 | 432586 | 3319  | 0.77  | 99.22 |
| scaffold00258 | 96765  | 100414 | 3650  | 1.12  | C_unshiu_02699 | 7639   | 3974   | 3666  | 18.45 | 98.94 |
| scaffold00258 | 102936 | 104578 | 1643  | 0.5   | C_unshiu_00078 | 492708 | 491062 | 1647  | 0.33  | 99.51 |
| scaffold00258 | 105023 | 107074 | 2052  | 0.63  | C_unshiu_00078 | 490333 | 488282 | 2052  | 0.41  | 99.81 |
| scaffold00258 | 107273 | 108488 | 1216  | 0.37  | C_unshiu_00078 | 487822 | 486605 | 1218  | 0.24  | 99.34 |
| scaffold00258 | 110607 | 112724 | 2118  | 0.65  | C_unshiu_00078 | 485007 | 482881 | 2127  | 0.43  | 98.92 |
| scaffold00258 | 122281 | 123433 | 1153  | 0.35  | C_unshiu_00078 | 477684 | 476532 | 1153  | 0.23  | 99.74 |
| scaffold00258 | 123118 | 126020 | 2903  | 0.89  | C_unshiu_00119 | 1      | 2900   | 2900  | 0.68  | 99.66 |
| scaffold00258 | 125985 | 127281 | 1297  | 0.4   | C_unshiu_00119 | 2902   | 4197   | 1296  | 0.3   | 99.61 |
| scaffold00258 | 130125 | 131732 | 1608  | 0.49  | C_unshiu_00119 | 7798   | 9406   | 1609  | 0.38  | 99.69 |
| scaffold00258 | 134667 | 142461 | 7795  | 2.38  | C_unshiu_00119 | 12928  | 20682  | 7755  | 1.82  | 98.43 |
| scaffold00258 | 142453 | 156613 | 14161 | 4.33  | C_unshiu_00119 | 21375  | 35586  | 14212 | 3.33  | 99.28 |
| scaffold00258 | 158151 | 207052 | 48902 | 14.95 | C_unshiu_00119 | 38311  | 87277  | 48967 | 11.48 | 99.5  |
| scaffold00258 | 207178 | 238068 | 30891 | 9.44  | C_unshiu_00119 | 87444  | 118478 | 31035 | 7.27  | 99.17 |
| scaffold00258 | 240145 | 241530 | 1386  | 0.42  | C_unshiu_00119 | 121089 | 122477 | 1389  | 0.33  | 99.42 |
| scaffold00258 | 241644 | 261755 | 20112 | 6.15  | C_unshiu_00119 | 122611 | 142748 | 20138 | 4.72  | 98.96 |
| scaffold00258 | 261798 | 287219 | 25422 | 7.77  | C_unshiu_00119 | 142747 | 168216 | 25470 | 5.97  | 98.9  |
| scaffold00258 | 287291 | 299860 | 12570 | 3.84  | C_unshiu_00119 | 168311 | 180817 | 12507 | 2.93  | 98.04 |
| scaffold00258 | 305105 | 310962 | 5858  | 1.79  | C_unshiu_02453 | 11834  | 17691  | 5858  | 22.42 | 100   |
| scaffold00258 | 312262 | 314671 | 2410  | 0.74  | C_unshiu_02453 | 24852  | 22443  | 2410  | 9.22  | 100   |
| scaffold00258 | 316241 | 317768 | 1528  | 0.47  | C_unshiu_02453 | 4308   | 5826   | 1519  | 5.81  | 98.1  |
| scaffold00259 | 1      | 16785  | 16785 | 5.2   | C_unshiu_00892 | 60630  | 77390  | 16761 | 14.24 | 99.78 |
| scaffold00259 | 24944  | 26198  | 1255  | 0.39  | C_unshiu_00892 | 80106  | 81360  | 1255  | 1.07  | 99.36 |
| scaffold00259 | 27204  | 28604  | 1401  | 0.43  | C_unshiu_00892 | 81841  | 83241  | 1401  | 1.19  | 100   |
| scaffold00259 | 29661  | 31576  | 1916  | 0.59  | C_unshiu_00892 | 84645  | 86559  | 1915  | 1.63  | 99.95 |
| scaffold00259 | 32365  | 33760  | 1396  | 0.43  | C_unshiu_00892 | 87397  | 88792  | 1396  | 1.19  | 100   |
| scaffold00259 | 34991  | 37710  | 2720  | 0.84  | C_unshiu_00892 | 90594  | 93308  | 2715  | 2.31  | 99.74 |
| scaffold00259 | 39488  | 42479  | 2992  | 0.93  | C_unshiu_00892 | 98874  | 101865 | 2992  | 2.54  | 100   |
| scaffold00259 | 43011  | 44910  | 1900  | 0.59  | C_unshiu_00892 | 102855 | 104754 | 1900  | 1.61  | 100   |
| scaffold00259 | 44914  | 46384  | 1471  | 0.46  | C_unshiu_00892 | 105600 | 107070 | 1471  | 1.25  | 100   |
| scaffold00259 | 48882  | 49998  | 1117  | 0.35  | C_unshiu_00892 | 89676  | 90793  | 1118  | 0.95  | 98.93 |
| scaffold00259 | 59800  | 106198 | 46399 | 14.38 | C_unshiu_00100 | 253743 | 300142 | 46400 | 10.15 | 99.94 |
| scaffold00259 | 107489 | 112306 | 4818  | 1.49  | C_unshiu_00100 | 302318 | 307132 | 4815  | 1.05  | 98.36 |
| scaffold00259 | 113002 | 126361 | 13360 | 4.14  | C_unshiu_00100 | 308139 | 321498 | 13360 | 2.92  | 100   |
| scaffold00259 | 128408 | 131282 | 2875  | 0.89  | C_unshiu_00156 | 292384 | 295258 | 2875  | 0.76  | 100   |
| scaffold00259 | 132215 | 197704 | 65490 | 20.3  | C_unshiu_00100 | 329716 | 395198 | 65483 | 14.33 | 99.89 |
| scaffold00259 | 197700 | 203010 | 5311  | 1.65  | C_unshiu_00081 | 460931 | 466241 | 5311  | 1.11  | 100   |
| scaffold00259 | 204039 | 214230 | 10192 | 3.16  | C_unshiu_00100 | 401730 | 411906 | 10177 | 2.23  | 99.67 |
| scaffold00259 | 219537 | 246320 | 26784 | 8.3   | C_unshiu_00195 | 1      | 26784  | 26784 | 7.88  | 99.9  |
| scaffold00259 | 247341 | 250090 | 2750  | 0.85  | C_unshiu_00195 | 28246  | 30995  | 2750  | 0.81  | 100   |
| scaffold00259 | 250980 | 253932 | 2953  | 0.92  | C_unshiu_00195 | 32762  | 35708  | 2947  | 0.87  | 99.73 |
| scaffold00259 | 254806 | 261023 | 6218  | 1.93  | C_unshiu_00195 | 110395 | 116612 | 6218  | 1.83  | 100   |
| scaffold00259 | 261398 | 269328 | 7931  | 2.46  | C_unshiu_00195 | 44712  | 52642  | 7931  | 2.33  | 99.77 |
| scaffold00259 | 269358 | 272401 | 3044  | 0.94  | C_unshiu_00195 | 52549  | 55593  | 3045  | 0.9   | 99.97 |
| scaffold00259 | 287885 | 295165 | 7281  | 2.26  | C_unshiu_00195 | 70577  | 77843  | 7267  | 2.14  | 99.01 |
| scaffold00259 | 313659 | 318951 | 5293  | 1.64  | C_unshiu_00100 | 396515 | 401807 | 5293  | 1.16  | 99.94 |

|               |        |        |        |       |                |        |        |        |       |       |
|---------------|--------|--------|--------|-------|----------------|--------|--------|--------|-------|-------|
| scaffold00263 | 626    | 1655   | 1030   | 0.32  | C_unshiu_00401 | 350    | 1379   | 1030   | 0.46  | 99.81 |
| scaffold00263 | 2565   | 37743  | 35179  | 10.96 | C_unshiu_00401 | 2235   | 37348  | 35114  | 15.75 | 99.47 |
| scaffold00263 | 39633  | 56294  | 16662  | 5.19  | C_unshiu_00738 | 3115   | 19750  | 16636  | 12.05 | 99.75 |
| scaffold00263 | 57626  | 61130  | 3505   | 1.09  | C_unshiu_00738 | 20753  | 24257  | 3505   | 2.54  | 99.91 |
| scaffold00263 | 61303  | 171876 | 110574 | 34.44 | C_unshiu_00738 | 24969  | 135482 | 110514 | 80.06 | 99.84 |
| scaffold00263 | 176786 | 262754 | 85969  | 26.78 | C_unshiu_00365 | 198844 | 112909 | 85936  | 36.66 | 99.95 |
| scaffold00263 | 242750 | 321071 | 78322  | 24.39 | C_unshiu_00365 | 132906 | 54596  | 78311  | 33.4  | 99.92 |
| scaffold00269 | 1      | 6164   | 6164   | 2     | C_unshiu_02140 | 35282  | 29119  | 6164   | 17.44 | 100   |
| scaffold00269 | 7478   | 9949   | 2472   | 0.8   | C_unshiu_02140 | 29117  | 26649  | 2469   | 6.99  | 99.03 |
| scaffold00269 | 10672  | 16503  | 5832   | 1.89  | C_unshiu_02140 | 26196  | 20367  | 5830   | 16.5  | 98.71 |
| scaffold00269 | 19834  | 34635  | 14802  | 4.79  | C_unshiu_02140 | 14758  | 1      | 14758  | 41.76 | 99.18 |
| scaffold00269 | 48693  | 71705  | 23013  | 7.45  | C_unshiu_00597 | 156531 | 133520 | 23012  | 13.67 | 99.77 |
| scaffold00269 | 73106  | 76157  | 3052   | 0.99  | C_unshiu_00597 | 131853 | 128820 | 3034   | 1.8   | 98.98 |
| scaffold00269 | 97759  | 111448 | 13690  | 4.43  | C_unshiu_02451 | 26156  | 12382  | 13775  | 52.66 | 98.53 |
| scaffold00269 | 128240 | 140631 | 12392  | 4.01  | C_unshiu_02451 | 12293  | 1      | 12293  | 47    | 98.66 |
| scaffold00269 | 150613 | 167993 | 17381  | 5.63  | C_unshiu_00029 | 676900 | 694286 | 17387  | 2.42  | 99.86 |
| scaffold00269 | 176061 | 180235 | 4175   | 1.35  | C_unshiu_00029 | 703637 | 707793 | 4157   | 0.58  | 98.18 |
| scaffold00269 | 178804 | 184248 | 5445   | 1.76  | C_unshiu_01267 | 77166  | 71703  | 5464   | 6.86  | 99.23 |
| scaffold00269 | 185945 | 203541 | 17597  | 5.7   | C_unshiu_01267 | 71666  | 54080  | 17587  | 22.1  | 98.99 |
| scaffold00269 | 209842 | 212785 | 2944   | 0.95  | C_unshiu_00980 | 106857 | 103915 | 2943   | 2.71  | 99.63 |
| scaffold00269 | 213503 | 219033 | 5531   | 1.79  | C_unshiu_00980 | 102838 | 97325  | 5514   | 5.07  | 98.45 |
| scaffold00269 | 220493 | 237739 | 17247  | 5.58  | C_unshiu_00980 | 95436  | 78191  | 17246  | 15.87 | 99.86 |
| scaffold00269 | 246345 | 268070 | 21726  | 7.03  | C_unshiu_00233 | 26056  | 47757  | 21702  | 7.1   | 99.82 |
| scaffold00269 | 272036 | 273424 | 1389   | 0.45  | C_unshiu_00360 | 19090  | 17702  | 1389   | 0.59  | 100   |
| scaffold00271 | 1      | 6185   | 6185   | 2.02  | C_unshiu_00328 | 11049  | 17233  | 6185   | 2.45  | 100   |
| scaffold00271 | 7458   | 10690  | 3233   | 1.06  | C_unshiu_00328 | 18199  | 21431  | 3233   | 1.28  | 100   |
| scaffold00271 | 11042  | 14801  | 3760   | 1.23  | C_unshiu_00328 | 22373  | 26132  | 3760   | 1.49  | 99.42 |
| scaffold00271 | 19012  | 66774  | 47763  | 15.6  | C_unshiu_00328 | 28350  | 76031  | 47682  | 18.85 | 99.31 |
| scaffold00271 | 67428  | 96198  | 28771  | 9.4   | C_unshiu_00328 | 76031  | 104795 | 28765  | 11.37 | 99.97 |
| scaffold00271 | 97660  | 151118 | 53459  | 17.47 | C_unshiu_00328 | 106742 | 160178 | 53437  | 21.13 | 99.93 |
| scaffold00271 | 151241 | 170146 | 18906  | 6.18  | C_unshiu_00328 | 160311 | 179185 | 18875  | 7.46  | 99.83 |
| scaffold00271 | 171675 | 216317 | 44643  | 14.59 | C_unshiu_00328 | 181138 | 225862 | 44725  | 17.68 | 99.73 |
| scaffold00271 | 218693 | 220821 | 2129   | 0.7   | C_unshiu_00328 | 227183 | 229320 | 2138   | 0.85  | 98.27 |
| scaffold00271 | 224704 | 226817 | 2114   | 0.69  | C_unshiu_00753 | 6383   | 8496   | 2114   | 1.56  | 100   |
| scaffold00271 | 226836 | 230886 | 4051   | 1.32  | C_unshiu_00753 | 9335   | 13398  | 4064   | 3     | 99.66 |
| scaffold00271 | 252737 | 269880 | 17144  | 5.6   | C_unshiu_00753 | 21244  | 38412  | 17169  | 12.66 | 99.84 |
| scaffold00273 | 1      | 27279  | 27279  | 8.95  | C_unshiu_00294 | 42422  | 69700  | 27279  | 10.13 | 99.99 |
| scaffold00273 | 35986  | 46383  | 10398  | 3.41  | C_unshiu_00294 | 82720  | 93117  | 10398  | 3.86  | 100   |
| scaffold00273 | 47110  | 50921  | 3812   | 1.25  | C_unshiu_00294 | 94332  | 98137  | 3806   | 1.41  | 99.55 |
| scaffold00273 | 65361  | 67899  | 2539   | 0.83  | C_unshiu_00061 | 465009 | 462463 | 2547   | 0.44  | 98.23 |
| scaffold00273 | 71400  | 75383  | 3984   | 1.31  | C_unshiu_00061 | 458553 | 454567 | 3987   | 0.69  | 98.75 |
| scaffold00273 | 77270  | 78916  | 1647   | 0.54  | C_unshiu_00402 | 196174 | 197820 | 1647   | 0.74  | 100   |
| scaffold00273 | 80214  | 87484  | 7271   | 2.39  | C_unshiu_00402 | 199462 | 206732 | 7271   | 3.27  | 99.94 |
| scaffold00273 | 100182 | 103737 | 3556   | 1.17  | C_unshiu_00061 | 446043 | 442485 | 3559   | 0.61  | 99.07 |
| scaffold00273 | 103890 | 105371 | 1482   | 0.49  | C_unshiu_00061 | 442310 | 440829 | 1482   | 0.26  | 100   |
| scaffold00273 | 105544 | 108369 | 2826   | 0.93  | C_unshiu_00061 | 440396 | 437576 | 2821   | 0.49  | 99.82 |
| scaffold00273 | 132037 | 135108 | 3072   | 1.01  | C_unshiu_00061 | 416591 | 413523 | 3069   | 0.53  | 98.86 |
| scaffold00273 | 135816 | 137391 | 1576   | 0.52  | C_unshiu_00061 | 412375 | 410804 | 1572   | 0.27  | 98.42 |
| scaffold00273 | 143312 | 144654 | 1343   | 0.44  | C_unshiu_00061 | 407941 | 406598 | 1344   | 0.23  | 99.11 |
| scaffold00273 | 144842 | 146031 | 1190   | 0.39  | C_unshiu_00044 | 359375 | 360563 | 1189   | 0.19  | 98.99 |
| scaffold00273 | 149517 | 164323 | 14807  | 4.86  | C_unshiu_02517 | 4189   | 19013  | 14825  | 61.41 | 99.55 |
| scaffold00273 | 164368 | 169179 | 4812   | 1.58  | C_unshiu_02517 | 19327  | 24142  | 4816   | 19.95 | 99.34 |
| scaffold00273 | 170102 | 177382 | 7281   | 2.39  | C_unshiu_00061 | 375019 | 367726 | 7294   | 1.26  | 99.23 |
| scaffold00273 | 180403 | 181548 | 1146   | 0.38  | C_unshiu_01112 | 89865  | 88722  | 1144   | 1.21  | 98.34 |
| scaffold00273 | 184863 | 186390 | 1528   | 0.5   | C_unshiu_00061 | 358738 | 360268 | 1531   | 0.26  | 98.89 |
| scaffold00273 | 188273 | 189508 | 1236   | 0.41  | C_unshiu_01112 | 83520  | 82283  | 1238   | 1.31  | 98.39 |
| scaffold00273 | 196725 | 198905 | 2181   | 0.72  | C_unshiu_01112 | 75985  | 73812  | 2174   | 2.3   | 98.49 |
| scaffold00273 | 202560 | 204028 | 1469   | 0.48  | C_unshiu_01112 | 71211  | 69736  | 1476   | 1.56  | 98.71 |
| scaffold00273 | 206024 | 210449 | 4426   | 1.45  | C_unshiu_01112 | 64019  | 59598  | 4422   | 4.67  | 98.58 |
| scaffold00273 | 210467 | 214474 | 4008   | 1.32  | C_unshiu_01112 | 57458  | 53448  | 4011   | 4.24  | 98.98 |
| scaffold00273 | 263441 | 270067 | 6627   | 2.17  | C_unshiu_01112 | 6624   | 1      | 6624   | 7     | 98.69 |
| scaffold00273 | 272972 | 286382 | 13411  | 4.4   | C_unshiu_00287 | 172304 | 185690 | 13387  | 4.9   | 98.12 |
| scaffold00275 | 11099  | 12539  | 1441   | 0.48  | C_unshiu_00653 | 112893 | 111447 | 1447   | 0.93  | 98.83 |
| scaffold00275 | 12540  | 14253  | 1714   | 0.57  | C_unshiu_00554 | 53037  | 51324  | 1714   | 0.97  | 98.83 |
| scaffold00275 | 15227  | 26073  | 10847  | 3.62  | C_unshiu_00653 | 111073 | 100232 | 10842  | 6.99  | 99.24 |
| scaffold00275 | 23752  | 33696  | 9945   | 3.32  | C_unshiu_02017 | 24967  | 15011  | 9957   | 24.86 | 99.27 |
| scaffold00275 | 27861  | 41649  | 13789  | 4.6   | C_unshiu_00653 | 98847  | 85089  | 13759  | 8.87  | 98.91 |
| scaffold00275 | 42564  | 44001  | 1438   | 0.48  | C_unshiu_02017 | 9145   | 7705   | 1441   | 3.6   | 99.38 |
| scaffold00275 | 48962  | 58319  | 9358   | 3.12  | C_unshiu_00653 | 78472  | 69102  | 9371   | 6.04  | 99.32 |
| scaffold00275 | 67054  | 72041  | 4988   | 1.66  | C_unshiu_00653 | 64989  | 59982  | 5008   | 3.23  | 99.16 |
| scaffold00275 | 82755  | 88254  | 5500   | 1.83  | C_unshiu_00653 | 48282  | 42783  | 5500   | 3.55  | 100   |
| scaffold00275 | 88250  | 90392  | 2143   | 0.71  | C_unshiu_00028 | 451846 | 453988 | 2143   | 0.3   | 100   |
| scaffold00275 | 102960 | 110899 | 7940   | 2.65  | C_unshiu_00957 | 106253 | 98298  | 7956   | 7.18  | 99.18 |
| scaffold00275 | 113385 | 130238 | 16854  | 5.62  | C_unshiu_00957 | 91599  | 74703  | 16897  | 15.24 | 98.45 |
| scaffold00275 | 140883 | 155674 | 14792  | 4.93  | C_unshiu_00957 | 71933  | 57082  | 14852  | 13.39 | 98.49 |
| scaffold00275 | 160539 | 182925 | 22387  | 7.47  | C_unshiu_00957 | 53271  | 30810  | 22462  | 20.26 | 99.13 |
| scaffold00275 | 183404 | 188480 | 5077   | 1.69  | C_unshiu_00957 | 30569  | 25467  | 5103   | 4.6   | 98    |
| scaffold00275 | 187978 | 203137 | 15160  | 5.06  | C_unshiu_00231 | 5492   | 20650  | 15159  | 4.94  | 98.89 |
| scaffold00275 | 203737 | 295131 | 91395  | 30.49 | C_unshiu_00231 | 21790  | 113186 | 91397  | 29.78 | 99.85 |

|               |        |        |       |      |                |        |        |       |       |       |
|---------------|--------|--------|-------|------|----------------|--------|--------|-------|-------|-------|
| scaffold00278 | 4930   | 10345  | 5416  | 1.82 | C_unshiu_00578 | 52939  | 47517  | 5423  | 3.16  | 98.12 |
| scaffold00278 | 7935   | 14422  | 6488  | 2.18 | C_unshiu_01781 | 28329  | 21849  | 6481  | 13.16 | 98.57 |
| scaffold00278 | 12913  | 23687  | 10775 | 3.62 | C_unshiu_00578 | 46009  | 35242  | 10768 | 6.27  | 99.69 |
| scaffold00278 | 42158  | 61262  | 19105 | 6.42 | C_unshiu_01270 | 79520  | 60356  | 19165 | 24.1  | 98.01 |
| scaffold00278 | 61501  | 72331  | 10831 | 3.64 | C_unshiu_01270 | 58181  | 47312  | 10870 | 13.67 | 98.54 |
| scaffold00278 | 74394  | 82367  | 7974  | 2.68 | C_unshiu_01270 | 47270  | 39252  | 8019  | 10.08 | 98.43 |
| scaffold00278 | 85313  | 87306  | 1994  | 0.67 | C_unshiu_01270 | 37398  | 35400  | 1999  | 2.51  | 98.55 |
| scaffold00278 | 87875  | 90720  | 2846  | 0.96 | C_unshiu_01270 | 34592  | 31729  | 2864  | 3.6   | 98.08 |
| scaffold00278 | 91133  | 92503  | 1371  | 0.46 | C_unshiu_01270 | 30928  | 29563  | 1366  | 1.72  | 98.98 |
| scaffold00278 | 97264  | 99547  | 2284  | 0.77 | C_unshiu_01270 | 24138  | 21855  | 2284  | 2.87  | 99.56 |
| scaffold00278 | 101658 | 106271 | 4614  | 1.55 | C_unshiu_01270 | 19215  | 14618  | 4598  | 5.78  | 99.24 |
| scaffold00278 | 107278 | 112238 | 4961  | 1.67 | C_unshiu_01270 | 12973  | 8013   | 4961  | 6.24  | 100   |
| scaffold00278 | 112825 | 124402 | 11578 | 3.89 | C_unshiu_00484 | 117597 | 129157 | 11561 | 5.87  | 99.53 |
| scaffold00278 | 127611 | 131506 | 3896  | 1.31 | C_unshiu_00484 | 131578 | 135480 | 3903  | 1.98  | 98.69 |
| scaffold00278 | 134259 | 143294 | 9036  | 3.03 | C_unshiu_00379 | 107330 | 98279  | 9052  | 3.93  | 98.04 |
| scaffold00278 | 135440 | 145117 | 9678  | 3.25 | C_unshiu_00379 | 84625  | 74947  | 9679  | 4.2   | 98.18 |
| scaffold00278 | 156634 | 158072 | 1439  | 0.48 | C_unshiu_00379 | 56506  | 55064  | 1443  | 0.63  | 99.17 |
| scaffold00278 | 158847 | 161011 | 2165  | 0.73 | C_unshiu_00379 | 50334  | 48168  | 2167  | 0.94  | 99.03 |
| scaffold00278 | 163353 | 165908 | 2556  | 0.86 | C_unshiu_00888 | 47119  | 44564  | 2556  | 2.16  | 99.61 |
| scaffold00278 | 165921 | 169720 | 3800  | 1.28 | C_unshiu_00379 | 48246  | 44441  | 3806  | 1.65  | 99.47 |
| scaffold00278 | 170253 | 175429 | 5177  | 1.74 | C_unshiu_00379 | 43524  | 38353  | 5172  | 2.25  | 99.81 |
| scaffold00278 | 176209 | 186903 | 10695 | 3.59 | C_unshiu_00379 | 37319  | 26604  | 10716 | 4.65  | 98.56 |
| scaffold00278 | 189203 | 190888 | 1686  | 0.57 | C_unshiu_00180 | 35731  | 37416  | 1686  | 0.47  | 100   |
| scaffold00278 | 201400 | 203132 | 1733  | 0.58 | C_unshiu_00379 | 25033  | 23300  | 1734  | 0.75  | 99.94 |
| scaffold00278 | 201400 | 203132 | 1733  | 0.58 | C_unshiu_02635 | 12196  | 13928  | 1733  | 8.15  | 100   |
| scaffold00278 | 208410 | 212402 | 3993  | 1.34 | C_unshiu_01186 | 83285  | 79298  | 3988  | 4.59  | 99.3  |
| scaffold00278 | 215842 | 219235 | 3394  | 1.14 | C_unshiu_01186 | 75404  | 72011  | 3394  | 3.91  | 100   |
| scaffold00278 | 222092 | 231108 | 9017  | 3.03 | C_unshiu_00379 | 9077   | 1      | 9077  | 3.94  | 98.01 |
| scaffold00278 | 236886 | 248605 | 11720 | 3.94 | C_unshiu_01186 | 55275  | 43536  | 11740 | 13.52 | 98.83 |
| scaffold00278 | 260906 | 269875 | 8970  | 3.01 | C_unshiu_01186 | 37671  | 28709  | 8963  | 10.32 | 99.15 |
| scaffold00278 | 274806 | 297787 | 22982 | 7.72 | C_unshiu_01186 | 28706  | 5779   | 22928 | 26.4  | 99.4  |
| scaffold00279 | 1      | 5571   | 5571  | 1.87 | C_unshiu_00387 | 69597  | 64035  | 5563  | 2.46  | 99.1  |
| scaffold00279 | 6569   | 8418   | 1850  | 0.62 | C_unshiu_00387 | 62616  | 60767  | 1850  | 0.82  | 100   |
| scaffold00279 | 9213   | 13008  | 3796  | 1.28 | C_unshiu_00387 | 59729  | 55937  | 3793  | 1.68  | 99.29 |
| scaffold00279 | 16722  | 21898  | 5177  | 1.74 | C_unshiu_00387 | 53258  | 48080  | 5179  | 2.29  | 99.94 |
| scaffold00279 | 42957  | 49716  | 6760  | 2.27 | C_unshiu_01401 | 11986  | 18735  | 6750  | 9.59  | 99.81 |
| scaffold00279 | 50642  | 53438  | 2797  | 0.94 | C_unshiu_01401 | 51475  | 54259  | 2785  | 3.96  | 98.47 |
| scaffold00279 | 59896  | 64657  | 4762  | 1.6  | C_unshiu_01401 | 59841  | 64603  | 4763  | 6.77  | 99.77 |
| scaffold00279 | 66797  | 68199  | 1403  | 0.47 | C_unshiu_01401 | 67526  | 68921  | 1396  | 1.98  | 98.51 |
| scaffold00279 | 87916  | 91759  | 3844  | 1.29 | C_unshiu_02478 | 23709  | 19846  | 3864  | 15.25 | 99.28 |
| scaffold00279 | 101439 | 105709 | 4271  | 1.44 | C_unshiu_00754 | 131307 | 135577 | 4271  | 3.15  | 100   |
| scaffold00279 | 105173 | 113201 | 8029  | 2.7  | C_unshiu_00754 | 116329 | 108298 | 8032  | 5.92  | 99.69 |
| scaffold00279 | 114180 | 122137 | 7958  | 2.68 | C_unshiu_02514 | 17123  | 9177   | 7947  | 32.86 | 99.81 |
| scaffold00279 | 132382 | 138158 | 5777  | 1.94 | C_unshiu_02261 | 16653  | 22468  | 5816  | 18.65 | 98.47 |
| scaffold00279 | 141161 | 142327 | 1167  | 0.39 | C_unshiu_00221 | 283912 | 285078 | 1167  | 0.37  | 100   |
| scaffold00279 | 143162 | 145132 | 1971  | 0.66 | C_unshiu_02261 | 21082  | 23043  | 1962  | 6.29  | 98.78 |
| scaffold00279 | 145150 | 146340 | 1191  | 0.4  | C_unshiu_00059 | 1188   | 1      | 1188  | 0.2   | 99.24 |
| scaffold00279 | 155434 | 160628 | 5195  | 1.75 | C_unshiu_00059 | 21779  | 26937  | 5159  | 0.88  | 98.88 |
| scaffold00279 | 163173 | 165391 | 2219  | 0.75 | C_unshiu_00059 | 28212  | 30433  | 2222  | 0.38  | 99.32 |
| scaffold00279 | 190300 | 197767 | 7468  | 2.51 | C_unshiu_00059 | 41427  | 48905  | 7479  | 1.27  | 99.12 |
| scaffold00279 | 198719 | 201995 | 3277  | 1.1  | C_unshiu_00059 | 49717  | 52996  | 3280  | 0.56  | 98.54 |
| scaffold00279 | 202040 | 203616 | 1577  | 0.53 | C_unshiu_01097 | 96329  | 94749  | 1581  | 1.64  | 98.87 |
| scaffold00279 | 203639 | 208283 | 4645  | 1.56 | C_unshiu_01097 | 94628  | 89984  | 4645  | 4.82  | 100   |
| scaffold00279 | 208370 | 218411 | 10042 | 3.38 | C_unshiu_01097 | 89886  | 79808  | 10079 | 10.46 | 99.4  |
| scaffold00279 | 223601 | 226878 | 3278  | 1.1  | C_unshiu_01097 | 75348  | 72070  | 3279  | 3.4   | 99.94 |
| scaffold00279 | 229316 | 231637 | 2322  | 0.78 | C_unshiu_01097 | 71113  | 68792  | 2322  | 2.41  | 99.83 |
| scaffold00279 | 237573 | 239528 | 1956  | 0.66 | C_unshiu_01097 | 63240  | 61283  | 1958  | 2.03  | 99.44 |
| scaffold00279 | 241614 | 245544 | 3931  | 1.32 | C_unshiu_01097 | 60552  | 56620  | 3933  | 4.08  | 98.5  |
| scaffold00279 | 248949 | 250539 | 1591  | 0.54 | C_unshiu_01097 | 53894  | 52304  | 1591  | 1.65  | 99.43 |
| scaffold00279 | 252388 | 266625 | 14238 | 4.79 | C_unshiu_01097 | 49954  | 35739  | 14216 | 14.76 | 99.42 |
| scaffold00279 | 272463 | 280314 | 7852  | 2.64 | C_unshiu_00181 | 162371 | 154523 | 7849  | 2.2   | 99.66 |
| scaffold00279 | 282281 | 290078 | 7798  | 2.62 | C_unshiu_00181 | 152513 | 144778 | 7736  | 2.17  | 99    |
| scaffold00281 | 15028  | 20084  | 5057  | 1.71 | C_unshiu_01092 | 67841  | 62793  | 5049  | 5.21  | 99.82 |
| scaffold00281 | 28166  | 36568  | 8403  | 2.84 | C_unshiu_00803 | 15155  | 23548  | 8394  | 6.56  | 98.04 |
| scaffold00281 | 36669  | 38111  | 1443  | 0.49 | C_unshiu_00803 | 23997  | 25442  | 1446  | 1.13  | 99.59 |
| scaffold00281 | 40172  | 42182  | 2011  | 0.68 | C_unshiu_00803 | 28049  | 30059  | 2011  | 1.57  | 99.35 |
| scaffold00281 | 42210  | 44287  | 2078  | 0.7  | C_unshiu_00803 | 29947  | 32024  | 2078  | 1.62  | 98.75 |
| scaffold00281 | 44377  | 46249  | 1873  | 0.63 | C_unshiu_00803 | 32137  | 33991  | 1855  | 1.45  | 98.29 |
| scaffold00281 | 47898  | 55140  | 7243  | 2.45 | C_unshiu_00803 | 36061  | 43315  | 7255  | 5.67  | 98.97 |
| scaffold00281 | 58734  | 61694  | 2961  | 1    | C_unshiu_00803 | 47538  | 50500  | 2963  | 2.32  | 99.73 |
| scaffold00281 | 62744  | 64553  | 1810  | 0.61 | C_unshiu_00803 | 50611  | 52420  | 1810  | 1.42  | 99.89 |
| scaffold00281 | 64553  | 69346  | 4794  | 1.62 | C_unshiu_00803 | 53700  | 58490  | 4791  | 3.75  | 99.6  |
| scaffold00281 | 69365  | 72225  | 2861  | 0.97 | C_unshiu_00803 | 58748  | 61617  | 2870  | 2.24  | 98.99 |
| scaffold00281 | 75587  | 76812  | 1226  | 0.41 | C_unshiu_00097 | 65191  | 63966  | 1226  | 0.27  | 100   |
| scaffold00281 | 77135  | 79737  | 2603  | 0.88 | C_unshiu_00097 | 63479  | 60877  | 2603  | 0.57  | 100   |
| scaffold00281 | 79760  | 92286  | 12527 | 4.24 | C_unshiu_01092 | 36712  | 49180  | 12469 | 12.87 | 98.65 |
| scaffold00281 | 85352  | 103853 | 18502 | 6.26 | C_unshiu_02371 | 1      | 18492  | 18492 | 66.4  | 99.55 |
| scaffold00281 | 104355 | 106574 | 2220  | 0.75 | C_unshiu_02371 | 18561  | 20782  | 2222  | 7.98  | 98.69 |
| scaffold00281 | 107527 | 111305 | 3779  | 1.28 | C_unshiu_00803 | 10091  | 13889  | 3799  | 2.97  | 98.84 |

|               |        |        |       |       |                |        |        |       |       |       |
|---------------|--------|--------|-------|-------|----------------|--------|--------|-------|-------|-------|
| scaffold00281 | 111828 | 123669 | 11842 | 4.01  | C_unshiu_01250 | 60864  | 72712  | 11849 | 14.64 | 99.78 |
| scaffold00281 | 125459 | 127049 | 1591  | 0.54  | C_unshiu_01250 | 74986  | 76575  | 1590  | 1.96  | 99.43 |
| scaffold00281 | 135341 | 137223 | 1883  | 0.64  | C_unshiu_01250 | 15323  | 13428  | 1896  | 2.34  | 99.16 |
| scaffold00281 | 139481 | 149969 | 10489 | 3.55  | C_unshiu_01250 | 12852  | 2398   | 10455 | 12.92 | 98.33 |
| scaffold00281 | 154730 | 157269 | 2540  | 0.86  | C_unshiu_01421 | 7130   | 4591   | 2540  | 3.66  | 100   |
| scaffold00281 | 159502 | 160656 | 1155  | 0.39  | C_unshiu_01421 | 1951   | 797    | 1155  | 1.66  | 100   |
| scaffold00281 | 165556 | 167035 | 1480  | 0.5   | C_unshiu_01178 | 87726  | 86247  | 1480  | 1.69  | 100   |
| scaffold00281 | 168015 | 169815 | 1801  | 0.61  | C_unshiu_01178 | 85067  | 83267  | 1801  | 2.05  | 100   |
| scaffold00281 | 171647 | 172852 | 1206  | 0.41  | C_unshiu_01178 | 82118  | 80913  | 1206  | 1.37  | 99.67 |
| scaffold00281 | 173638 | 175005 | 1368  | 0.46  | C_unshiu_00141 | 380397 | 381764 | 1368  | 0.34  | 99.85 |
| scaffold00281 | 175413 | 177546 | 2134  | 0.72  | C_unshiu_00658 | 48860  | 50993  | 2134  | 1.38  | 99.53 |
| scaffold00281 | 177932 | 179205 | 1274  | 0.43  | C_unshiu_00658 | 51593  | 52865  | 1273  | 0.83  | 99.22 |
| scaffold00281 | 183877 | 198977 | 15101 | 5.11  | C_unshiu_01178 | 76968  | 61866  | 15103 | 17.22 | 98.25 |
| scaffold00281 | 198987 | 207155 | 8169  | 2.76  | C_unshiu_01178 | 56651  | 48509  | 8143  | 9.28  | 98.96 |
| scaffold00281 | 207435 | 208729 | 1295  | 0.44  | C_unshiu_01178 | 48112  | 46818  | 1295  | 1.48  | 99.85 |
| scaffold00281 | 208804 | 210829 | 2026  | 0.69  | C_unshiu_01178 | 46726  | 44699  | 2028  | 2.31  | 99.36 |
| scaffold00281 | 211096 | 227595 | 16500 | 5.58  | C_unshiu_01178 | 44097  | 27596  | 16502 | 18.81 | 99.85 |
| scaffold00281 | 229868 | 254085 | 24218 | 8.19  | C_unshiu_01178 | 24778  | 561    | 24218 | 27.61 | 99.98 |
| scaffold00281 | 255286 | 260002 | 4717  | 1.6   | C_unshiu_00142 | 399692 | 394975 | 4718  | 1.18  | 99.51 |
| scaffold00281 | 260862 | 267106 | 6245  | 2.11  | C_unshiu_00723 | 35477  | 29221  | 6257  | 4.46  | 98.42 |
| scaffold00281 | 273214 | 284565 | 11352 | 3.84  | C_unshiu_01114 | 6160   | 17511  | 11352 | 12.02 | 99.33 |
| scaffold00281 | 293377 | 295646 | 2270  | 0.77  | C_unshiu_01318 | 74017  | 71748  | 2270  | 3     | 100   |
| scaffold00283 | 305    | 8145   | 7841  | 2.66  | C_unshiu_02386 | 14373  | 6517   | 7857  | 28.52 | 98.59 |
| scaffold00283 | 8139   | 9751   | 1613  | 0.55  | C_unshiu_00934 | 59494  | 57882  | 1613  | 1.43  | 100   |
| scaffold00283 | 9752   | 13062  | 3311  | 1.12  | C_unshiu_02386 | 6144   | 2815   | 3330  | 12.09 | 98.26 |
| scaffold00283 | 16940  | 19703  | 2764  | 0.94  | C_unshiu_02386 | 25388  | 22621  | 2768  | 10.05 | 98.71 |
| scaffold00283 | 23948  | 36393  | 12446 | 4.22  | C_unshiu_01751 | 6352   | 18763  | 12412 | 24.59 | 98.99 |
| scaffold00283 | 38651  | 59429  | 20779 | 7.04  | C_unshiu_01751 | 21764  | 42606  | 20843 | 41.3  | 99.4  |
| scaffold00283 | 59443  | 63106  | 3664  | 1.24  | C_unshiu_01751 | 42966  | 46638  | 3673  | 7.28  | 99.56 |
| scaffold00283 | 59444  | 63106  | 3663  | 1.24  | C_unshiu_00119 | 200491 | 204169 | 3679  | 0.86  | 99.46 |
| scaffold00283 | 63110  | 66667  | 3558  | 1.21  | C_unshiu_00119 | 204322 | 207884 | 3563  | 0.84  | 99.02 |
| scaffold00283 | 66664  | 76960  | 10297 | 3.49  | C_unshiu_00119 | 207918 | 218255 | 10338 | 2.42  | 98.73 |
| scaffold00283 | 77702  | 81084  | 3383  | 1.15  | C_unshiu_00119 | 218802 | 222177 | 3376  | 0.79  | 98.85 |
| scaffold00283 | 81420  | 103749 | 22330 | 7.56  | C_unshiu_00119 | 222179 | 244549 | 22371 | 5.24  | 99.18 |
| scaffold00283 | 103741 | 114851 | 11111 | 3.76  | C_unshiu_00119 | 245197 | 256377 | 11181 | 2.62  | 98.34 |
| scaffold00283 | 114854 | 157079 | 42226 | 14.3  | C_unshiu_00119 | 256721 | 298946 | 42226 | 9.9   | 99.24 |
| scaffold00283 | 164787 | 174214 | 9428  | 3.19  | C_unshiu_00119 | 304805 | 314244 | 9440  | 2.21  | 99.26 |
| scaffold00283 | 179712 | 196436 | 16725 | 5.67  | C_unshiu_00119 | 317444 | 334226 | 16783 | 3.93  | 99.13 |
| scaffold00283 | 212872 | 234373 | 21502 | 7.28  | C_unshiu_00119 | 345957 | 367579 | 21623 | 5.07  | 99.08 |
| scaffold00283 | 234483 | 247942 | 13460 | 4.56  | C_unshiu_00119 | 367579 | 380992 | 13414 | 3.14  | 98.65 |
| scaffold00283 | 260883 | 295229 | 34347 | 11.63 | C_unshiu_00636 | 22339  | 56653  | 34315 | 21.48 | 99.56 |
| scaffold00284 | 26248  | 31905  | 5658  | 1.94  | C_unshiu_00268 | 5650   | 11307  | 5658  | 2     | 100   |
| scaffold00284 | 31928  | 37310  | 5383  | 1.85  | C_unshiu_00268 | 12050  | 17432  | 5383  | 1.91  | 100   |
| scaffold00284 | 37405  | 51027  | 13623 | 4.68  | C_unshiu_00268 | 17877  | 31499  | 13623 | 4.82  | 99.86 |
| scaffold00284 | 52074  | 70027  | 17954 | 6.16  | C_unshiu_00268 | 33108  | 51070  | 17963 | 6.36  | 99.95 |
| scaffold00284 | 70189  | 79823  | 9635  | 3.31  | C_unshiu_00268 | 51258  | 60900  | 9643  | 3.41  | 99.76 |
| scaffold00284 | 94379  | 110929 | 16551 | 5.68  | C_unshiu_00268 | 76258  | 92807  | 16550 | 5.86  | 99.84 |
| scaffold00284 | 112079 | 133948 | 21870 | 7.51  | C_unshiu_00268 | 94558  | 116430 | 21873 | 7.74  | 99.99 |
| scaffold00284 | 134422 | 135758 | 1337  | 0.46  | C_unshiu_00268 | 118514 | 119850 | 1337  | 0.47  | 100   |
| scaffold00284 | 136502 | 215476 | 78975 | 27.11 | C_unshiu_00268 | 120972 | 199933 | 78962 | 27.95 | 99.96 |
| scaffold00284 | 195471 | 266110 | 70640 | 24.24 | C_unshiu_00268 | 179945 | 250595 | 70651 | 25.01 | 99.93 |
| scaffold00284 | 275131 | 286662 | 11532 | 3.96  | C_unshiu_00268 | 261966 | 273519 | 11554 | 4.09  | 99.6  |
| scaffold00284 | 286662 | 290818 | 4157  | 1.43  | C_unshiu_00268 | 273901 | 278057 | 4157  | 1.47  | 99.74 |
| scaffold00285 | 1      | 13646  | 13646 | 4.71  | C_unshiu_01164 | 21055  | 7466   | 13590 | 15.17 | 99.49 |
| scaffold00285 | 14445  | 19083  | 4639  | 1.6   | C_unshiu_01164 | 6110   | 1472   | 4639  | 5.18  | 100   |
| scaffold00285 | 29789  | 31028  | 1240  | 0.43  | C_unshiu_00145 | 225948 | 227186 | 1239  | 0.31  | 98.87 |
| scaffold00285 | 35358  | 37732  | 2375  | 0.82  | C_unshiu_00634 | 102038 | 104408 | 2371  | 1.48  | 98.74 |
| scaffold00285 | 40627  | 48477  | 7851  | 2.71  | C_unshiu_03073 | 1      | 7809   | 7809  | 75.46 | 98.73 |
| scaffold00285 | 52458  | 53820  | 1363  | 0.47  | C_unshiu_01001 | 3291   | 4653   | 1363  | 1.29  | 99.85 |
| scaffold00285 | 56564  | 75372  | 18809 | 6.5   | C_unshiu_00964 | 90274  | 71472  | 18803 | 17.03 | 99.49 |
| scaffold00285 | 73017  | 77501  | 4485  | 1.55  | C_unshiu_01001 | 10796  | 15283  | 4488  | 4.23  | 98.35 |
| scaffold00285 | 89199  | 91566  | 2368  | 0.82  | C_unshiu_00964 | 68162  | 65790  | 2373  | 2.15  | 99.28 |
| scaffold00285 | 114291 | 117055 | 2765  | 0.96  | C_unshiu_01785 | 8598   | 5836   | 2763  | 5.63  | 98.3  |
| scaffold00285 | 117055 | 122996 | 5942  | 2.05  | C_unshiu_01785 | 5898   | 1      | 5898  | 12.01 | 98.1  |
| scaffold00285 | 126963 | 132887 | 5925  | 2.05  | C_unshiu_00373 | 167915 | 161967 | 5949  | 2.56  | 98.39 |
| scaffold00285 | 148693 | 150271 | 1579  | 0.55  | C_unshiu_00373 | 153634 | 152052 | 1583  | 0.68  | 98.86 |
| scaffold00285 | 153897 | 156744 | 2848  | 0.98  | C_unshiu_00138 | 386248 | 383401 | 2848  | 0.71  | 100   |
| scaffold00285 | 159321 | 184395 | 25075 | 8.66  | C_unshiu_00373 | 147318 | 122214 | 25105 | 10.82 | 99.52 |
| scaffold00285 | 187776 | 192959 | 5184  | 1.79  | C_unshiu_00373 | 119628 | 114446 | 5183  | 2.23  | 99.96 |
| scaffold00285 | 193586 | 194844 | 1259  | 0.43  | C_unshiu_00373 | 112606 | 111348 | 1259  | 0.54  | 99.13 |
| scaffold00285 | 197804 | 204989 | 7186  | 2.48  | C_unshiu_00373 | 107470 | 100257 | 7214  | 3.11  | 98.14 |
| scaffold00285 | 211281 | 212735 | 1455  | 0.5   | C_unshiu_00373 | 93825  | 92377  | 1449  | 0.62  | 99.11 |
| scaffold00285 | 212551 | 216401 | 3851  | 1.33  | C_unshiu_00443 | 203382 | 199533 | 3850  | 1.83  | 99.38 |
| scaffold00285 | 216827 | 220206 | 3380  | 1.17  | C_unshiu_00443 | 198505 | 195131 | 3375  | 1.6   | 99.14 |
| scaffold00285 | 220239 | 222488 | 2250  | 0.78  | C_unshiu_00443 | 194685 | 192434 | 2252  | 1.07  | 99.47 |
| scaffold00285 | 223968 | 228347 | 4380  | 1.51  | C_unshiu_00443 | 192434 | 188044 | 4391  | 2.09  | 99.05 |
| scaffold00285 | 230081 | 232318 | 2238  | 0.77  | C_unshiu_00443 | 181570 | 179335 | 2236  | 1.06  | 98.57 |
| scaffold00285 | 243349 | 254844 | 11496 | 3.97  | C_unshiu_00443 | 176596 | 165081 | 11516 | 5.47  | 98.82 |
| scaffold00285 | 256342 | 268017 | 11676 | 4.03  | C_unshiu_00443 | 164626 | 152901 | 11726 | 5.57  | 98.82 |

|               |        |        |       |       |                |        |        |       |       |       |
|---------------|--------|--------|-------|-------|----------------|--------|--------|-------|-------|-------|
| scaffold00285 | 272542 | 277009 | 4468  | 1.54  | C_unshiu_00443 | 150493 | 146018 | 4476  | 2.13  | 98.86 |
| scaffold00285 | 280432 | 287494 | 7063  | 2.44  | C_unshiu_01101 | 96027  | 88970  | 7058  | 7.35  | 99.82 |
| scaffold00285 | 288113 | 289445 | 1333  | 0.46  | C_unshiu_02305 | 12457  | 13789  | 1333  | 4.49  | 99.85 |
| scaffold00286 | 6004   | 8535   | 2532  | 0.88  | C_unshiu_00949 | 54610  | 57141  | 2532  | 2.27  | 99.84 |
| scaffold00286 | 10293  | 18162  | 7870  | 2.72  | C_unshiu_00949 | 58944  | 66813  | 7870  | 7.04  | 99.83 |
| scaffold00286 | 19169  | 35741  | 16573 | 5.74  | C_unshiu_02554 | 5737   | 22282  | 16546 | 71.5  | 99.69 |
| scaffold00286 | 39279  | 65975  | 26697 | 9.24  | C_unshiu_00135 | 114735 | 141412 | 26678 | 6.57  | 98.89 |
| scaffold00286 | 66114  | 85621  | 19508 | 6.75  | C_unshiu_00135 | 141414 | 160950 | 19537 | 4.81  | 99.28 |
| scaffold00286 | 93013  | 95143  | 2131  | 0.74  | C_unshiu_00135 | 162614 | 164739 | 2126  | 0.52  | 98.78 |
| scaffold00286 | 95855  | 150192 | 54338 | 18.81 | C_unshiu_00135 | 164755 | 219104 | 54350 | 13.38 | 99.34 |
| scaffold00286 | 153527 | 173073 | 19547 | 6.77  | C_unshiu_00135 | 219985 | 239526 | 19542 | 4.81  | 98.86 |
| scaffold00286 | 174456 | 181830 | 7375  | 2.55  | C_unshiu_00135 | 239691 | 247041 | 7351  | 1.81  | 98.39 |
| scaffold00286 | 175374 | 185962 | 10589 | 3.67  | C_unshiu_02673 | 4610   | 15201  | 10592 | 51.76 | 99.61 |
| scaffold00286 | 185986 | 191124 | 5139  | 1.78  | C_unshiu_02673 | 15321  | 20465  | 5145  | 25.14 | 99.61 |
| scaffold00286 | 188819 | 191532 | 2714  | 0.94  | C_unshiu_00135 | 248557 | 251272 | 2716  | 0.67  | 99.71 |
| scaffold00286 | 191533 | 192969 | 1437  | 0.5   | C_unshiu_01054 | 22302  | 20866  | 1437  | 1.44  | 100   |
| scaffold00286 | 192963 | 196286 | 3324  | 1.15  | C_unshiu_00135 | 249316 | 252634 | 3319  | 0.82  | 99.67 |
| scaffold00286 | 201199 | 207674 | 6476  | 2.24  | C_unshiu_00135 | 263997 | 270471 | 6475  | 1.59  | 99.41 |
| scaffold00286 | 207830 | 248588 | 40759 | 14.11 | C_unshiu_00135 | 270685 | 311496 | 40812 | 10.05 | 99.18 |
| scaffold00286 | 254431 | 288872 | 34442 | 11.92 | C_unshiu_00135 | 318527 | 352991 | 34465 | 8.49  | 99.3  |
| scaffold00287 | 20375  | 30920  | 10546 | 3.69  | C_unshiu_02424 | 26456  | 15950  | 10507 | 39.18 | 99.41 |
| scaffold00287 | 31674  | 34153  | 2480  | 0.87  | C_unshiu_02424 | 14421  | 11941  | 2481  | 9.25  | 99.03 |
| scaffold00287 | 44471  | 49500  | 5030  | 1.76  | C_unshiu_02131 | 6852   | 11876  | 5025  | 14.12 | 99.32 |
| scaffold00287 | 56074  | 57306  | 1233  | 0.43  | C_unshiu_00943 | 62845  | 61616  | 1230  | 1.1   | 99.68 |
| scaffold00287 | 72696  | 75590  | 2895  | 1.01  | C_unshiu_01145 | 25426  | 28320  | 2895  | 3.17  | 100   |
| scaffold00287 | 76181  | 86702  | 10522 | 3.68  | C_unshiu_01145 | 29369  | 39893  | 10525 | 11.52 | 99.91 |
| scaffold00287 | 88246  | 92610  | 4365  | 1.53  | C_unshiu_01145 | 41062  | 45432  | 4371  | 4.78  | 98.54 |
| scaffold00287 | 121289 | 129025 | 7737  | 2.7   | C_unshiu_00756 | 5995   | 13731  | 7737  | 5.72  | 99.86 |
| scaffold00287 | 129470 | 130672 | 1203  | 0.42  | C_unshiu_01145 | 60088  | 61289  | 1202  | 1.32  | 99.83 |
| scaffold00287 | 132113 | 133244 | 1132  | 0.4   | C_unshiu_01145 | 69400  | 70531  | 1132  | 1.24  | 98.94 |
| scaffold00287 | 132792 | 137689 | 4898  | 1.71  | C_unshiu_01145 | 64084  | 68982  | 4899  | 5.36  | 99.9  |
| scaffold00287 | 143918 | 145306 | 1389  | 0.49  | C_unshiu_01145 | 75278  | 76664  | 1387  | 1.52  | 99.42 |
| scaffold00287 | 145889 | 150848 | 4960  | 1.73  | C_unshiu_01145 | 78047  | 83006  | 4960  | 5.43  | 100   |
| scaffold00287 | 156161 | 159124 | 2964  | 1.04  | C_unshiu_01145 | 88014  | 90981  | 2968  | 3.25  | 98.19 |
| scaffold00287 | 178792 | 183625 | 4834  | 1.69  | C_unshiu_00858 | 85881  | 81061  | 4821  | 3.96  | 98.37 |
| scaffold00287 | 199209 | 201645 | 2437  | 0.85  | C_unshiu_00858 | 72017  | 69578  | 2440  | 2     | 99.63 |
| scaffold00287 | 206417 | 207689 | 1273  | 0.44  | C_unshiu_00858 | 68719  | 67447  | 1273  | 1.04  | 99.14 |
| scaffold00287 | 208169 | 214355 | 6187  | 2.16  | C_unshiu_00858 | 63988  | 57776  | 6213  | 5.1   | 98.44 |
| scaffold00287 | 230478 | 235200 | 4723  | 1.65  | C_unshiu_00198 | 332102 | 327368 | 4735  | 1.41  | 98.12 |
| scaffold00287 | 235422 | 242494 | 7073  | 2.47  | C_unshiu_00198 | 327216 | 320146 | 7071  | 2.1   | 99.56 |
| scaffold00287 | 245054 | 246169 | 1116  | 0.39  | C_unshiu_00198 | 317500 | 316383 | 1118  | 0.33  | 99.73 |
| scaffold00287 | 247024 | 249258 | 2235  | 0.78  | C_unshiu_00198 | 315869 | 313631 | 2239  | 0.67  | 99.64 |
| scaffold00287 | 254593 | 268474 | 13882 | 4.85  | C_unshiu_00143 | 20931  | 7086   | 13846 | 3.47  | 98.56 |
| scaffold00287 | 269707 | 274107 | 4401  | 1.54  | C_unshiu_00143 | 5298   | 898    | 4401  | 1.1   | 99.84 |
| scaffold00290 | 7574   | 9072   | 1499  | 0.53  | C_unshiu_02494 | 8204   | 6706   | 1499  | 6.07  | 98.87 |
| scaffold00290 | 10940  | 13750  | 2811  | 1     | C_unshiu_02494 | 4081   | 1271   | 2811  | 11.39 | 99.36 |
| scaffold00290 | 52230  | 55262  | 3033  | 1.08  | C_unshiu_00097 | 111134 | 108097 | 3038  | 0.66  | 99.44 |
| scaffold00290 | 55348  | 57762  | 2415  | 0.86  | C_unshiu_00097 | 107681 | 105269 | 2413  | 0.52  | 98.59 |
| scaffold00290 | 57776  | 60531  | 2756  | 0.98  | C_unshiu_00097 | 104480 | 101725 | 2756  | 0.6   | 99.93 |
| scaffold00290 | 61182  | 75810  | 14629 | 5.2   | C_unshiu_00097 | 100575 | 85959  | 14617 | 3.17  | 99.74 |
| scaffold00290 | 76823  | 79174  | 2352  | 0.84  | C_unshiu_01124 | 38418  | 36067  | 2352  | 2.52  | 100   |
| scaffold00290 | 79907  | 83668  | 3762  | 1.34  | C_unshiu_00097 | 117422 | 121187 | 3766  | 0.82  | 98.88 |
| scaffold00290 | 93958  | 104841 | 10884 | 3.87  | C_unshiu_00097 | 132472 | 143430 | 10959 | 2.38  | 98.76 |
| scaffold00290 | 107213 | 109859 | 2647  | 0.94  | C_unshiu_00097 | 144561 | 147215 | 2655  | 0.58  | 98.27 |
| scaffold00290 | 110661 | 129830 | 19170 | 6.81  | C_unshiu_00097 | 148505 | 167691 | 19187 | 4.16  | 99.55 |
| scaffold00290 | 130674 | 153088 | 22415 | 7.97  | C_unshiu_00097 | 169517 | 191993 | 22477 | 4.88  | 99.53 |
| scaffold00290 | 153084 | 158438 | 5355  | 1.9   | C_unshiu_00902 | 76233  | 81587  | 5355  | 4.59  | 100   |
| scaffold00290 | 158439 | 160422 | 1984  | 0.71  | C_unshiu_00097 | 196917 | 198903 | 1987  | 0.43  | 99.25 |
| scaffold00290 | 160559 | 173642 | 13084 | 4.65  | C_unshiu_00097 | 199518 | 212637 | 13120 | 2.85  | 99.56 |
| scaffold00290 | 173680 | 185954 | 12275 | 4.36  | C_unshiu_00097 | 212615 | 224893 | 12279 | 2.67  | 99.5  |
| scaffold00290 | 184979 | 190787 | 5809  | 2.06  | C_unshiu_00097 | 224402 | 230218 | 5817  | 1.26  | 99.57 |
| scaffold00290 | 191139 | 194391 | 3253  | 1.16  | C_unshiu_00097 | 230999 | 234254 | 3256  | 0.71  | 99.23 |
| scaffold00290 | 194390 | 195774 | 1385  | 0.49  | C_unshiu_00016 | 865460 | 864077 | 1384  | 0.16  | 98.7  |
| scaffold00290 | 195775 | 209972 | 14198 | 5.05  | C_unshiu_00097 | 234249 | 248457 | 14209 | 3.08  | 99.25 |
| scaffold00290 | 209591 | 230950 | 21360 | 7.59  | C_unshiu_00097 | 248455 | 269825 | 21371 | 4.64  | 99.78 |
| scaffold00290 | 231017 | 233293 | 2277  | 0.81  | C_unshiu_00097 | 270066 | 272351 | 2286  | 0.5   | 98.6  |
| scaffold00290 | 233287 | 249575 | 16289 | 5.79  | C_unshiu_00097 | 272301 | 288614 | 16314 | 3.54  | 99.25 |
| scaffold00290 | 247545 | 280944 | 33400 | 11.87 | C_unshiu_01541 | 1      | 33401  | 33401 | 54.79 | 99.87 |
| scaffold00292 | 1539   | 41961  | 40423 | 14.45 | C_unshiu_01344 | 67233  | 26831  | 40403 | 54.31 | 99.84 |
| scaffold00292 | 41954  | 44036  | 2083  | 0.74  | C_unshiu_01476 | 30591  | 32673  | 2083  | 3.22  | 100   |
| scaffold00292 | 46308  | 68927  | 22620 | 8.09  | C_unshiu_01344 | 23056  | 433    | 22624 | 30.41 | 99.97 |
| scaffold00292 | 97297  | 152797 | 55501 | 19.84 | C_unshiu_00108 | 196485 | 140986 | 55500 | 12.44 | 99.97 |
| scaffold00292 | 154043 | 163889 | 9847  | 3.52  | C_unshiu_00108 | 139321 | 129438 | 9884  | 2.21  | 99.52 |
| scaffold00292 | 170681 | 224933 | 54253 | 19.4  | C_unshiu_00108 | 129699 | 75392  | 54308 | 12.17 | 99.9  |
| scaffold00292 | 204957 | 262584 | 57628 | 20.6  | C_unshiu_00108 | 95399  | 37741  | 57659 | 12.92 | 99.95 |
| scaffold00293 | 1      | 1547   | 1547  | 0.55  | C_unshiu_01067 | 23515  | 21969  | 1547  | 1.56  | 99.74 |
| scaffold00293 | 3706   | 5752   | 2047  | 0.73  | C_unshiu_01067 | 71663  | 73710  | 2048  | 2.07  | 99.07 |
| scaffold00293 | 8142   | 9356   | 1215  | 0.43  | C_unshiu_02791 | 16877  | 18090  | 1214  | 6.71  | 98.27 |
| scaffold00293 | 21742  | 26698  | 4957  | 1.77  | C_unshiu_00025 | 703484 | 708444 | 4961  | 0.66  | 98.97 |

|               |        |        |       |       |                |        |        |       |       |       |
|---------------|--------|--------|-------|-------|----------------|--------|--------|-------|-------|-------|
| scaffold00293 | 25821  | 36041  | 10221 | 3.66  | C_unshiu_00025 | 713405 | 723668 | 10264 | 1.36  | 98.52 |
| scaffold00293 | 38133  | 40334  | 2202  | 0.79  | C_unshiu_00025 | 722793 | 725008 | 2216  | 0.29  | 98.2  |
| scaffold00293 | 54163  | 56335  | 2173  | 0.78  | C_unshiu_00025 | 736712 | 738859 | 2148  | 0.28  | 98.12 |
| scaffold00293 | 56691  | 57762  | 1072  | 0.38  | C_unshiu_00025 | 739470 | 740544 | 1075  | 0.14  | 99.63 |
| scaffold00293 | 58386  | 63884  | 5499  | 1.97  | C_unshiu_00025 | 741068 | 746592 | 5525  | 0.73  | 98.23 |
| scaffold00293 | 64136  | 71423  | 7288  | 2.61  | C_unshiu_00862 | 72225  | 64955  | 7271  | 5.99  | 99.08 |
| scaffold00293 | 71425  | 72907  | 1483  | 0.53  | C_unshiu_00373 | 91841  | 90360  | 1482  | 0.64  | 99.93 |
| scaffold00293 | 74474  | 75698  | 1225  | 0.44  | C_unshiu_03021 | 1477   | 2701   | 1225  | 9.91  | 99.43 |
| scaffold00293 | 76009  | 81556  | 5548  | 1.98  | C_unshiu_03021 | 3122   | 8628   | 5507  | 44.55 | 99.06 |
| scaffold00293 | 100830 | 105655 | 4826  | 1.73  | C_unshiu_01029 | 10831  | 5992   | 4840  | 4.7   | 99.26 |
| scaffold00293 | 108741 | 110466 | 1726  | 0.62  | C_unshiu_01232 | 1549   | 3273   | 1725  | 2.1   | 99.36 |
| scaffold00293 | 108741 | 110466 | 1726  | 0.62  | C_unshiu_01827 | 9669   | 11396  | 1728  | 3.64  | 98.96 |
| scaffold00293 | 110546 | 112127 | 1582  | 0.57  | C_unshiu_01827 | 12043  | 13623  | 1581  | 3.33  | 99.43 |
| scaffold00293 | 120956 | 122005 | 1050  | 0.38  | C_unshiu_01232 | 8348   | 9399   | 1052  | 1.28  | 98.95 |
| scaffold00293 | 121912 | 126748 | 4837  | 1.73  | C_unshiu_01232 | 9351   | 14216  | 4866  | 5.92  | 98.56 |
| scaffold00293 | 126741 | 127967 | 1227  | 0.44  | C_unshiu_00517 | 144633 | 145859 | 1227  | 0.66  | 100   |
| scaffold00293 | 133898 | 161710 | 27813 | 9.95  | C_unshiu_01232 | 23206  | 51088  | 27883 | 33.93 | 99.15 |
| scaffold00293 | 169939 | 179667 | 9729  | 3.48  | C_unshiu_02232 | 5      | 9641   | 9637  | 29.96 | 98.14 |
| scaffold00293 | 181334 | 187569 | 6236  | 2.23  | C_unshiu_02232 | 11839  | 18063  | 6225  | 19.36 | 99.79 |
| scaffold00293 | 187570 | 189631 | 2062  | 0.74  | C_unshiu_00032 | 546603 | 548664 | 2062  | 0.29  | 100   |
| scaffold00293 | 189886 | 200044 | 10159 | 3.63  | C_unshiu_01232 | 61379  | 71528  | 10150 | 12.35 | 99.85 |
| scaffold00293 | 206728 | 214258 | 7531  | 2.69  | C_unshiu_00680 | 7540   | 1      | 7540  | 5.08  | 98.39 |
| scaffold00293 | 207205 | 214270 | 7066  | 2.53  | C_unshiu_02232 | 25114  | 32161  | 7048  | 21.91 | 98.29 |
| scaffold00293 | 228486 | 248581 | 20096 | 7.19  | C_unshiu_00680 | 30647  | 50771  | 20125 | 13.55 | 98.26 |
| scaffold00293 | 251578 | 252648 | 1071  | 0.38  | C_unshiu_00881 | 23452  | 24522  | 1071  | 0.9   | 100   |
| scaffold00293 | 268221 | 270283 | 2063  | 0.74  | C_unshiu_00680 | 84859  | 86921  | 2063  | 1.39  | 98.94 |
| scaffold00293 | 273199 | 276382 | 3184  | 1.14  | C_unshiu_00680 | 86733  | 89916  | 3184  | 2.14  | 99.69 |
| scaffold00293 | 276393 | 279562 | 3170  | 1.13  | C_unshiu_00680 | 90212  | 93381  | 3170  | 2.13  | 99.81 |
| scaffold00296 | 12953  | 14727  | 1775  | 0.64  | C_unshiu_00335 | 179299 | 177527 | 1773  | 0.71  | 99.72 |
| scaffold00296 | 14881  | 15970  | 1090  | 0.4   | C_unshiu_01719 | 27192  | 26102  | 1091  | 2.1   | 99.91 |
| scaffold00296 | 27144  | 32359  | 5216  | 1.89  | C_unshiu_01719 | 15219  | 10002  | 5218  | 10.06 | 99.03 |
| scaffold00296 | 32398  | 41594  | 9197  | 3.34  | C_unshiu_01719 | 10105  | 926    | 9180  | 17.7  | 98.26 |
| scaffold00296 | 49385  | 57247  | 7863  | 2.85  | C_unshiu_00335 | 149152 | 141252 | 7901  | 3.15  | 98.53 |
| scaffold00296 | 60311  | 66042  | 5732  | 2.08  | C_unshiu_00335 | 139141 | 133419 | 5723  | 2.28  | 98.99 |
| scaffold00296 | 69210  | 84269  | 15060 | 5.46  | C_unshiu_00335 | 131455 | 116273 | 15183 | 6.06  | 98.37 |
| scaffold00296 | 84893  | 89707  | 4815  | 1.75  | C_unshiu_00335 | 116255 | 111433 | 4823  | 1.92  | 99.56 |
| scaffold00296 | 128508 | 129643 | 1136  | 0.41  | C_unshiu_00019 | 53184  | 54311  | 1128  | 0.13  | 98.07 |
| scaffold00296 | 135148 | 173784 | 38637 | 14.02 | C_unshiu_00335 | 85578  | 46948  | 38631 | 15.41 | 98.53 |
| scaffold00296 | 178863 | 196923 | 18061 | 6.55  | C_unshiu_02151 | 1987   | 19987  | 18001 | 51.37 | 99.32 |
| scaffold00296 | 196983 | 199126 | 2144  | 0.78  | C_unshiu_02151 | 20820  | 22963  | 2144  | 6.12  | 99.91 |
| scaffold00296 | 199724 | 205290 | 5567  | 2.02  | C_unshiu_02151 | 24003  | 29566  | 5564  | 15.88 | 99.59 |
| scaffold00296 | 202380 | 211327 | 8948  | 3.25  | C_unshiu_00566 | 26179  | 17229  | 8951  | 5.12  | 98.38 |
| scaffold00296 | 217696 | 220901 | 3206  | 1.16  | C_unshiu_00566 | 11549  | 8344   | 3206  | 1.83  | 100   |
| scaffold00296 | 220910 | 222415 | 1506  | 0.55  | C_unshiu_00566 | 7123   | 5618   | 1506  | 0.86  | 100   |
| scaffold00296 | 225031 | 229664 | 4634  | 1.68  | C_unshiu_00566 | 4641   | 1      | 4641  | 2.65  | 98.71 |
| scaffold00296 | 231947 | 250882 | 18936 | 6.87  | C_unshiu_00875 | 110082 | 91141  | 18942 | 15.82 | 98.93 |
| scaffold00296 | 243841 | 256315 | 12475 | 4.53  | C_unshiu_02321 | 1      | 12503  | 12503 | 42.78 | 99.25 |
| scaffold00296 | 260236 | 263413 | 3178  | 1.15  | C_unshiu_02321 | 22086  | 25273  | 3188  | 10.91 | 99.37 |
| scaffold00299 | 7077   | 41842  | 34766 | 12.65 | C_unshiu_00613 | 164612 | 129835 | 34778 | 21.13 | 99.97 |
| scaffold00299 | 42986  | 74158  | 31173 | 11.34 | C_unshiu_00613 | 128180 | 97006  | 31175 | 18.94 | 99.97 |
| scaffold00299 | 74178  | 81792  | 7615  | 2.77  | C_unshiu_00613 | 97128  | 89524  | 7605  | 4.62  | 99.61 |
| scaffold00299 | 80589  | 164917 | 84329 | 30.68 | C_unshiu_00613 | 84334  | 11     | 84324 | 51.23 | 99.85 |
| scaffold00299 | 173324 | 195112 | 21789 | 7.93  | C_unshiu_00177 | 207407 | 185625 | 21783 | 6.03  | 99.97 |
| scaffold00299 | 195881 | 255054 | 59174 | 21.53 | C_unshiu_00177 | 184441 | 125265 | 59177 | 16.38 | 99.99 |
| scaffold00299 | 256492 | 269802 | 13311 | 4.84  | C_unshiu_00177 | 123349 | 110039 | 13311 | 3.68  | 100   |
| scaffold00299 | 265157 | 272789 | 7633  | 2.78  | C_unshiu_00177 | 110028 | 102411 | 7618  | 2.11  | 99.22 |
| scaffold00301 | 1      | 6985   | 6985  | 2.55  | C_unshiu_00507 | 32600  | 39519  | 6920  | 3.66  | 98.07 |
| scaffold00301 | 8451   | 10549  | 2099  | 0.77  | C_unshiu_00507 | 41989  | 44087  | 2099  | 1.11  | 99.95 |
| scaffold00301 | 11266  | 14415  | 3150  | 1.15  | C_unshiu_00507 | 45263  | 48412  | 3150  | 1.67  | 100   |
| scaffold00301 | 14534  | 20119  | 5586  | 2.04  | C_unshiu_00507 | 48725  | 54310  | 5586  | 2.95  | 100   |
| scaffold00301 | 21243  | 26191  | 4949  | 1.81  | C_unshiu_00507 | 55930  | 60895  | 4966  | 2.63  | 99.3  |
| scaffold00301 | 27179  | 44321  | 17143 | 6.26  | C_unshiu_00605 | 159413 | 142289 | 17125 | 10.33 | 99.82 |
| scaffold00301 | 44420  | 45937  | 1518  | 0.55  | C_unshiu_00605 | 141777 | 140271 | 1507  | 0.91  | 99.14 |
| scaffold00301 | 47314  | 62467  | 15154 | 5.54  | C_unshiu_00605 | 138777 | 123628 | 15150 | 9.14  | 99.24 |
| scaffold00301 | 64924  | 66216  | 1293  | 0.47  | C_unshiu_00605 | 120272 | 118969 | 1304  | 0.79  | 98.62 |
| scaffold00301 | 82094  | 99027  | 16934 | 6.19  | C_unshiu_00643 | 48007  | 64940  | 16934 | 10.7  | 99.93 |
| scaffold00301 | 107439 | 111994 | 4556  | 1.66  | C_unshiu_00643 | 77426  | 81976  | 4551  | 2.88  | 98.49 |
| scaffold00301 | 112917 | 116801 | 3885  | 1.42  | C_unshiu_00643 | 74090  | 77975  | 3886  | 2.46  | 99.07 |
| scaffold00301 | 122720 | 126577 | 3858  | 1.41  | C_unshiu_00643 | 90698  | 94549  | 3852  | 2.43  | 98.14 |
| scaffold00301 | 127881 | 129756 | 1876  | 0.69  | C_unshiu_00643 | 94633  | 96524  | 1892  | 1.2   | 98.04 |
| scaffold00301 | 182510 | 186652 | 4143  | 1.51  | C_unshiu_00643 | 148258 | 152399 | 4142  | 2.62  | 99.06 |
| scaffold00301 | 190784 | 193861 | 3078  | 1.12  | C_unshiu_00177 | 8754   | 11832  | 3079  | 0.85  | 98.6  |
| scaffold00301 | 195228 | 202487 | 7260  | 2.65  | C_unshiu_00177 | 12529  | 19835  | 7307  | 2.02  | 98.18 |
| scaffold00301 | 202465 | 239841 | 37377 | 13.65 | C_unshiu_00177 | 20347  | 57849  | 37503 | 10.38 | 98.88 |
| scaffold00301 | 263322 | 265474 | 2153  | 0.79  | C_unshiu_00177 | 88208  | 90360  | 2153  | 0.6   | 100   |
| scaffold00301 | 265545 | 267659 | 2115  | 0.77  | C_unshiu_00177 | 96816  | 98921  | 2106  | 0.58  | 99.15 |
| scaffold00301 | 267362 | 271230 | 3869  | 1.41  | C_unshiu_00177 | 92723  | 96560  | 3838  | 1.06  | 98.61 |
| scaffold00304 | 2903   | 22128  | 19226 | 7.07  | C_unshiu_02256 | 29266  | 10040  | 19227 | 61.14 | 99.88 |
| scaffold00304 | 20510  | 27081  | 6572  | 2.42  | C_unshiu_01118 | 60121  | 66670  | 6550  | 6.97  | 99.35 |

|               |        |        |        |       |                |        |        |        |       |       |
|---------------|--------|--------|--------|-------|----------------|--------|--------|--------|-------|-------|
| scaffold00304 | 31701  | 36759  | 5059   | 1.86  | C_unshiu_02525 | 13596  | 18654  | 5059   | 21.13 | 99.98 |
| scaffold00304 | 36785  | 44285  | 7501   | 2.76  | C_unshiu_01118 | 71207  | 78701  | 7495   | 7.98  | 98.78 |
| scaffold00304 | 44286  | 46990  | 2705   | 0.99  | C_unshiu_01138 | 33234  | 30530  | 2705   | 2.93  | 100   |
| scaffold00304 | 53907  | 58269  | 4363   | 1.6   | C_unshiu_01118 | 87722  | 92068  | 4347   | 4.63  | 99.22 |
| scaffold00304 | 58286  | 61995  | 3710   | 1.36  | C_unshiu_00728 | 111674 | 107934 | 3741   | 2.69  | 98.69 |
| scaffold00304 | 63615  | 66398  | 2784   | 1.02  | C_unshiu_00728 | 107688 | 104886 | 2803   | 2.02  | 98.32 |
| scaffold00304 | 66922  | 68143  | 1222   | 0.45  | C_unshiu_00728 | 103992 | 102768 | 1225   | 0.88  | 99.02 |
| scaffold00304 | 68325  | 80314  | 11990  | 4.41  | C_unshiu_00728 | 102428 | 90439  | 11990  | 8.63  | 99.43 |
| scaffold00304 | 89595  | 91383  | 1789   | 0.66  | C_unshiu_00728 | 80871  | 79083  | 1789   | 1.29  | 100   |
| scaffold00304 | 95740  | 97287  | 1548   | 0.57  | C_unshiu_02575 | 1758   | 3306   | 1549   | 6.84  | 99.55 |
| scaffold00304 | 97727  | 103431 | 5705   | 2.1   | C_unshiu_02575 | 4004   | 9722   | 5719   | 25.24 | 98.72 |
| scaffold00304 | 108379 | 110959 | 2581   | 0.95  | C_unshiu_00617 | 130633 | 133215 | 2583   | 1.58  | 99.61 |
| scaffold00304 | 111705 | 114203 | 2499   | 0.92  | C_unshiu_00617 | 134418 | 136923 | 2506   | 1.53  | 99.36 |
| scaffold00304 | 114231 | 140534 | 26304  | 9.67  | C_unshiu_00617 | 137288 | 163626 | 26339  | 16.1  | 99.21 |
| scaffold00304 | 151726 | 163077 | 11352  | 4.17  | C_unshiu_02805 | 5335   | 16604  | 11270  | 63.24 | 98.79 |
| scaffold00304 | 165350 | 172993 | 7644   | 2.81  | C_unshiu_03012 | 3664   | 11316  | 7653   | 60.98 | 99.75 |
| scaffold00304 | 174963 | 176180 | 1218   | 0.45  | C_unshiu_02155 | 6076   | 7293   | 1218   | 3.5   | 99.26 |
| scaffold00304 | 180121 | 182327 | 2207   | 0.81  | C_unshiu_02155 | 10660  | 12867  | 2208   | 6.35  | 98.32 |
| scaffold00304 | 183682 | 190189 | 6508   | 2.39  | C_unshiu_00774 | 9914   | 3455   | 6460   | 4.89  | 98.11 |
| scaffold00304 | 198084 | 202439 | 4356   | 1.6   | C_unshiu_00617 | 81963  | 86334  | 4372   | 2.67  | 98.88 |
| scaffold00304 | 202439 | 206924 | 4486   | 1.65  | C_unshiu_00617 | 86779  | 91264  | 4486   | 2.74  | 99.71 |
| scaffold00304 | 206943 | 208264 | 1322   | 0.49  | C_unshiu_00223 | 306150 | 307471 | 1322   | 0.42  | 99.85 |
| scaffold00304 | 208570 | 217282 | 8713   | 3.2   | C_unshiu_00617 | 94137  | 102849 | 8713   | 5.32  | 99.37 |
| scaffold00304 | 217975 | 219463 | 1489   | 0.55  | C_unshiu_00617 | 104220 | 105704 | 1485   | 0.91  | 98.19 |
| scaffold00304 | 224013 | 235570 | 11558  | 4.25  | C_unshiu_02557 | 11553  | 23108  | 11556  | 50.01 | 99.72 |
| scaffold00304 | 238302 | 250985 | 12684  | 4.66  | C_unshiu_03007 | 12681  | 1      | 12681  | 100   | 99.92 |
| scaffold00304 | 258079 | 263472 | 5394   | 1.98  | C_unshiu_02141 | 22682  | 28075  | 5394   | 15.28 | 99.96 |
| scaffold00304 | 264167 | 267263 | 3097   | 1.14  | C_unshiu_02141 | 30857  | 33953  | 3097   | 8.77  | 100   |
| scaffold00304 | 268337 | 271401 | 3065   | 1.13  | C_unshiu_02965 | 9699   | 6645   | 3055   | 21.83 | 98.11 |
| scaffold00305 | 3139   | 4488   | 1350   | 0.5   | C_unshiu_00001 | 837868 | 836511 | 1358   | 0.05  | 98.53 |
| scaffold00305 | 3535   | 44610  | 41076  | 15.1  | C_unshiu_00583 | 2822   | 43959  | 41138  | 24.08 | 99.19 |
| scaffold00305 | 44295  | 58255  | 13961  | 5.13  | C_unshiu_00583 | 43725  | 57528  | 13804  | 8.08  | 98.06 |
| scaffold00305 | 58255  | 80564  | 22310  | 8.2   | C_unshiu_00583 | 57822  | 79989  | 22168  | 12.98 | 98.89 |
| scaffold00305 | 81652  | 97662  | 16011  | 5.89  | C_unshiu_00583 | 81570  | 97579  | 16010  | 9.37  | 99.96 |
| scaffold00305 | 98007  | 108048 | 10042  | 3.69  | C_unshiu_00583 | 98366  | 108401 | 10036  | 5.88  | 99.9  |
| scaffold00305 | 108048 | 112368 | 4321   | 1.59  | C_unshiu_00195 | 321138 | 316817 | 4322   | 1.27  | 99.68 |
| scaffold00305 | 116719 | 148293 | 31575  | 11.61 | C_unshiu_00195 | 268872 | 237298 | 31575  | 9.28  | 99.94 |
| scaffold00305 | 148894 | 193589 | 44696  | 16.43 | C_unshiu_00195 | 236701 | 191991 | 44711  | 13.15 | 99.9  |
| scaffold00305 | 199940 | 203273 | 3334   | 1.23  | C_unshiu_00195 | 186161 | 182833 | 3329   | 0.98  | 99.79 |
| scaffold00305 | 204018 | 206739 | 2722   | 1     | C_unshiu_00195 | 178580 | 175859 | 2722   | 0.8   | 100   |
| scaffold00305 | 217239 | 235762 | 18524  | 6.81  | C_unshiu_00195 | 166320 | 147820 | 18501  | 5.44  | 99.87 |
| scaffold00305 | 236609 | 238426 | 1818   | 0.67  | C_unshiu_00195 | 146843 | 145023 | 1821   | 0.54  | 99.29 |
| scaffold00305 | 238547 | 241692 | 3146   | 1.16  | C_unshiu_00195 | 145023 | 141878 | 3146   | 0.93  | 100   |
| scaffold00305 | 241756 | 250804 | 9049   | 3.33  | C_unshiu_00195 | 141533 | 132485 | 9049   | 2.66  | 99.82 |
| scaffold00305 | 251530 | 256738 | 5209   | 1.92  | C_unshiu_00195 | 130973 | 125739 | 5235   | 1.54  | 98.13 |
| scaffold00305 | 265304 | 266658 | 1355   | 0.5   | C_unshiu_00195 | 103114 | 101760 | 1355   | 0.4   | 100   |
| scaffold00306 | 1102   | 4681   | 3580   | 1.32  | C_unshiu_02430 | 4      | 3568   | 3565   | 13.34 | 99.25 |
| scaffold00306 | 4692   | 14764  | 10073  | 3.71  | C_unshiu_02430 | 3812   | 13903  | 10092  | 37.77 | 99.81 |
| scaffold00306 | 16235  | 22278  | 6044   | 2.22  | C_unshiu_02430 | 15502  | 21548  | 6047   | 22.63 | 99.83 |
| scaffold00306 | 24344  | 26026  | 1683   | 0.62  | C_unshiu_02430 | 26718  | 25035  | 1684   | 6.3   | 98.23 |
| scaffold00306 | 30126  | 31745  | 1620   | 0.6   | C_unshiu_00083 | 337856 | 336237 | 1620   | 0.34  | 100   |
| scaffold00306 | 32590  | 34002  | 1413   | 0.52  | C_unshiu_00826 | 121059 | 122470 | 1412   | 1.12  | 99.36 |
| scaffold00306 | 34019  | 40153  | 6135   | 2.26  | C_unshiu_00083 | 333603 | 327469 | 6135   | 1.3   | 100   |
| scaffold00306 | 40224  | 43306  | 3083   | 1.13  | C_unshiu_01398 | 17510  | 14428  | 3083   | 4.38  | 99.61 |
| scaffold00306 | 43322  | 51962  | 8641   | 3.18  | C_unshiu_00083 | 324450 | 315800 | 8651   | 1.83  | 99.76 |
| scaffold00306 | 52267  | 55875  | 3609   | 1.33  | C_unshiu_00083 | 315386 | 311794 | 3593   | 0.76  | 99.36 |
| scaffold00306 | 55891  | 157943 | 102053 | 37.54 | C_unshiu_00083 | 311123 | 209032 | 102092 | 21.59 | 99.96 |
| scaffold00306 | 159355 | 190756 | 31402  | 11.55 | C_unshiu_00083 | 207205 | 175791 | 31415  | 6.64  | 99.94 |
| scaffold00306 | 192481 | 193801 | 1321   | 0.49  | C_unshiu_00083 | 173730 | 172406 | 1325   | 0.28  | 99.7  |
| scaffold00306 | 193998 | 249008 | 55011  | 20.24 | C_unshiu_00083 | 172040 | 117025 | 55016  | 11.64 | 99.97 |
| scaffold00307 | 6049   | 7604   | 1556   | 0.57  | C_unshiu_01073 | 79246  | 80799  | 1554   | 1.58  | 99.49 |
| scaffold00307 | 9576   | 17533  | 7958   | 2.93  | C_unshiu_01073 | 83339  | 91298  | 7960   | 8.08  | 99.76 |
| scaffold00307 | 17646  | 19908  | 2263   | 0.83  | C_unshiu_00283 | 35804  | 38069  | 2266   | 0.82  | 98.76 |
| scaffold00307 | 20028  | 26278  | 6251   | 2.3   | C_unshiu_01073 | 92323  | 98554  | 6232   | 6.32  | 98.5  |
| scaffold00307 | 33438  | 41615  | 8178   | 3.01  | C_unshiu_02155 | 26573  | 34754  | 8182   | 23.54 | 99.33 |
| scaffold00307 | 60527  | 62426  | 1900   | 0.7   | C_unshiu_00413 | 77705  | 79604  | 1900   | 0.86  | 98.63 |
| scaffold00307 | 63773  | 67910  | 4138   | 1.52  | C_unshiu_00413 | 81593  | 85729  | 4137   | 1.87  | 99.83 |
| scaffold00307 | 67898  | 69815  | 1918   | 0.71  | C_unshiu_00413 | 79686  | 81603  | 1918   | 0.87  | 99.37 |
| scaffold00307 | 69161  | 72003  | 2843   | 1.05  | C_unshiu_00413 | 85666  | 88505  | 2840   | 1.29  | 99.61 |
| scaffold00307 | 77982  | 80907  | 2926   | 1.08  | C_unshiu_00413 | 100453 | 97535  | 2919   | 1.32  | 98.94 |
| scaffold00307 | 92452  | 94078  | 1627   | 0.6   | C_unshiu_00413 | 108300 | 109925 | 1626   | 0.74  | 98.16 |
| scaffold00307 | 96124  | 98886  | 2763   | 1.02  | C_unshiu_00413 | 122930 | 125683 | 2754   | 1.25  | 98.7  |
| scaffold00307 | 118377 | 122491 | 4115   | 1.51  | C_unshiu_00413 | 142709 | 146829 | 4121   | 1.86  | 98.84 |
| scaffold00307 | 123336 | 126897 | 3562   | 1.31  | C_unshiu_00413 | 147761 | 151307 | 3547   | 1.61  | 98.82 |
| scaffold00307 | 129904 | 135897 | 5994   | 2.21  | C_unshiu_01166 | 18826  | 12824  | 6003   | 6.73  | 98.43 |
| scaffold00307 | 140249 | 160519 | 20271  | 7.46  | C_unshiu_00413 | 166525 | 186729 | 20205  | 9.14  | 98.76 |
| scaffold00307 | 164928 | 181126 | 16199  | 5.96  | C_unshiu_00413 | 188222 | 204379 | 16158  | 7.31  | 98.55 |
| scaffold00307 | 182867 | 191379 | 8513   | 3.13  | C_unshiu_00413 | 204719 | 213234 | 8516   | 3.85  | 99.72 |
| scaffold00307 | 190203 | 191626 | 1424   | 0.52  | C_unshiu_01166 | 27022  | 25599  | 1424   | 1.6   | 99.65 |

|               |        |        |       |       |                |        |        |       |       |       |
|---------------|--------|--------|-------|-------|----------------|--------|--------|-------|-------|-------|
| scaffold00307 | 194555 | 198464 | 3910  | 1.44  | C_unshiu_00427 | 203900 | 199977 | 3924  | 1.81  | 99.64 |
| scaffold00307 | 198459 | 202278 | 3820  | 1.41  | C_unshiu_00427 | 199586 | 195757 | 3830  | 1.77  | 99.43 |
| scaffold00307 | 204408 | 234819 | 30412 | 11.19 | C_unshiu_02022 | 30401  | 30     | 30372 | 76.42 | 99.35 |
| scaffold00307 | 226932 | 237111 | 10180 | 3.75  | C_unshiu_00427 | 187858 | 177684 | 10175 | 4.69  | 99.41 |
| scaffold00307 | 237821 | 248720 | 10900 | 4.01  | C_unshiu_00427 | 178245 | 167338 | 10908 | 5.03  | 98.58 |
| scaffold00307 | 254493 | 258694 | 4202  | 1.55  | C_unshiu_00427 | 162255 | 158055 | 4201  | 1.94  | 98.84 |
| scaffold00307 | 265333 | 266745 | 1413  | 0.52  | C_unshiu_00427 | 152135 | 150725 | 1411  | 0.65  | 98.87 |
| scaffold00307 | 270690 | 271729 | 1040  | 0.38  | C_unshiu_00427 | 148697 | 147658 | 1040  | 0.48  | 100   |
| scaffold00308 | 2225   | 29307  | 27083 | 10.01 | C_unshiu_00710 | 7      | 27032  | 27026 | 18.99 | 99.54 |
| scaffold00308 | 30722  | 107809 | 77088 | 28.49 | C_unshiu_00710 | 28160  | 105253 | 77094 | 54.16 | 99.82 |
| scaffold00308 | 107810 | 109640 | 1831  | 0.68  | C_unshiu_00080 | 281273 | 283103 | 1831  | 0.37  | 100   |
| scaffold00308 | 111826 | 121345 | 9520  | 3.52  | C_unshiu_00710 | 108603 | 118122 | 9520  | 6.69  | 99.94 |
| scaffold00308 | 122063 | 140150 | 18088 | 6.68  | C_unshiu_00710 | 118165 | 136233 | 18069 | 12.69 | 99.7  |
| scaffold00308 | 145806 | 151315 | 5510  | 2.04  | C_unshiu_01168 | 86656  | 81174  | 5483  | 6.19  | 99.11 |
| scaffold00308 | 151307 | 154024 | 2718  | 1     | C_unshiu_01168 | 81023  | 78306  | 2718  | 3.07  | 99.93 |
| scaffold00308 | 156214 | 167204 | 10991 | 4.06  | C_unshiu_01168 | 78811  | 67895  | 10917 | 12.32 | 98.12 |
| scaffold00308 | 173577 | 206729 | 33153 | 12.25 | C_unshiu_01044 | 1      | 33143  | 33143 | 32.73 | 99.9  |
| scaffold00308 | 206933 | 248312 | 41380 | 15.29 | C_unshiu_01044 | 33808  | 75207  | 41400 | 40.89 | 99.63 |
| scaffold00308 | 252111 | 270573 | 18463 | 6.82  | C_unshiu_01044 | 78415  | 96882  | 18468 | 18.24 | 98.49 |
| scaffold00309 | 1      | 1443   | 1443  | 0.54  | C_unshiu_00959 | 2257   | 3699   | 1443  | 1.3   | 100   |
| scaffold00309 | 2370   | 19898  | 17529 | 6.5   | C_unshiu_00959 | 4951   | 22514  | 17564 | 15.86 | 99.04 |
| scaffold00309 | 21111  | 33946  | 12836 | 4.76  | C_unshiu_00602 | 103867 | 91032  | 12836 | 7.67  | 98.81 |
| scaffold00309 | 33939  | 36750  | 2812  | 1.04  | C_unshiu_00602 | 90555  | 87734  | 2822  | 1.69  | 98.19 |
| scaffold00309 | 36747  | 59304  | 22558 | 8.36  | C_unshiu_00602 | 86298  | 63763  | 22536 | 13.47 | 98.83 |
| scaffold00309 | 71796  | 93266  | 21471 | 7.96  | C_unshiu_00602 | 56413  | 34904  | 21510 | 12.86 | 99.19 |
| scaffold00309 | 93266  | 97277  | 4012  | 1.49  | C_unshiu_00602 | 34754  | 30707  | 4048  | 2.42  | 98.76 |
| scaffold00309 | 97165  | 106836 | 9672  | 3.59  | C_unshiu_00602 | 30661  | 20973  | 9689  | 5.79  | 99.21 |
| scaffold00309 | 107400 | 110718 | 3319  | 1.23  | C_unshiu_00015 | 877135 | 873817 | 3319  | 0.38  | 99.67 |
| scaffold00309 | 110378 | 113139 | 2762  | 1.02  | C_unshiu_00015 | 874035 | 871274 | 2762  | 0.31  | 99.53 |
| scaffold00309 | 114121 | 125265 | 11145 | 4.13  | C_unshiu_00015 | 870398 | 859245 | 11154 | 1.27  | 99.57 |
| scaffold00309 | 126786 | 128967 | 2182  | 0.81  | C_unshiu_00602 | 21045  | 18863  | 2183  | 1.31  | 99.4  |
| scaffold00309 | 126850 | 130106 | 3257  | 1.21  | C_unshiu_00015 | 859964 | 856728 | 3237  | 0.37  | 98.19 |
| scaffold00309 | 140834 | 143717 | 2884  | 1.07  | C_unshiu_00602 | 5910   | 3024   | 2887  | 1.73  | 98.72 |
| scaffold00309 | 154199 | 185802 | 31604 | 11.72 | C_unshiu_01339 | 72769  | 41213  | 31557 | 42.29 | 99.75 |
| scaffold00309 | 185942 | 205437 | 19496 | 7.23  | C_unshiu_01339 | 40917  | 21422  | 19496 | 26.13 | 99.99 |
| scaffold00309 | 205407 | 207628 | 2222  | 0.82  | C_unshiu_01339 | 21369  | 19148  | 2222  | 2.98  | 100   |
| scaffold00309 | 207830 | 225693 | 17864 | 6.62  | C_unshiu_01339 | 17864  | 1      | 17864 | 23.94 | 99.82 |
| scaffold00309 | 247530 | 249263 | 1734  | 0.64  | C_unshiu_01145 | 23159  | 21426  | 1734  | 1.9   | 100   |
| scaffold00309 | 267845 | 268874 | 1030  | 0.38  | C_unshiu_02326 | 23716  | 24744  | 1029  | 3.54  | 98.25 |
| scaffold00310 | 1      | 2415   | 2415  | 0.9   | C_unshiu_02128 | 11020  | 8615   | 2406  | 6.75  | 99.17 |
| scaffold00310 | 5809   | 8767   | 2959  | 1.1   | C_unshiu_01239 | 62938  | 65922  | 2985  | 3.65  | 98.93 |
| scaffold00310 | 5809   | 8767   | 2959  | 1.1   | C_unshiu_02218 | 5105   | 2147   | 2959  | 9.06  | 99.83 |
| scaffold00310 | 9058   | 10827  | 1770  | 0.66  | C_unshiu_01239 | 66747  | 68517  | 1771  | 2.17  | 99.77 |
| scaffold00310 | 11876  | 14168  | 2293  | 0.85  | C_unshiu_01408 | 57301  | 55008  | 2294  | 3.27  | 99.87 |
| scaffold00310 | 15556  | 18893  | 3338  | 1.24  | C_unshiu_01408 | 53180  | 49843  | 3338  | 4.76  | 99.88 |
| scaffold00310 | 30675  | 32124  | 1450  | 0.54  | C_unshiu_00263 | 217407 | 218856 | 1450  | 0.51  | 99.79 |
| scaffold00310 | 32118  | 34421  | 2304  | 0.86  | C_unshiu_01168 | 53884  | 51581  | 2304  | 2.6   | 100   |
| scaffold00310 | 34422  | 55713  | 21292 | 7.92  | C_unshiu_00263 | 222155 | 243474 | 21320 | 7.48  | 99.62 |
| scaffold00310 | 55418  | 58076  | 2659  | 0.99  | C_unshiu_00263 | 243472 | 246132 | 2661  | 0.93  | 99.77 |
| scaffold00310 | 58820  | 62443  | 3624  | 1.35  | C_unshiu_01348 | 48125  | 51748  | 3624  | 4.88  | 100   |
| scaffold00310 | 62437  | 64879  | 2443  | 0.91  | C_unshiu_00263 | 249533 | 251970 | 2438  | 0.86  | 99.1  |
| scaffold00310 | 65635  | 71151  | 5517  | 2.05  | C_unshiu_00263 | 253052 | 258581 | 5530  | 1.94  | 99.49 |
| scaffold00310 | 76119  | 78530  | 2412  | 0.9   | C_unshiu_01439 | 67556  | 65132  | 2425  | 3.59  | 98.23 |
| scaffold00310 | 79172  | 83641  | 4470  | 1.66  | C_unshiu_00420 | 85921  | 81484  | 4438  | 2.03  | 99.15 |
| scaffold00310 | 83647  | 92841  | 9195  | 3.42  | C_unshiu_00420 | 81105  | 71911  | 9195  | 4.2   | 99.84 |
| scaffold00310 | 92860  | 94657  | 1798  | 0.67  | C_unshiu_00420 | 71203  | 69406  | 1798  | 0.82  | 100   |
| scaffold00310 | 96606  | 98393  | 1788  | 0.66  | C_unshiu_01348 | 52206  | 54002  | 1797  | 2.42  | 99.33 |
| scaffold00310 | 99921  | 101352 | 1432  | 0.53  | C_unshiu_01348 | 56173  | 57604  | 1432  | 1.93  | 100   |
| scaffold00310 | 102487 | 108819 | 6333  | 2.35  | C_unshiu_01348 | 60039  | 66368  | 6330  | 8.53  | 98.39 |
| scaffold00310 | 113510 | 120793 | 7284  | 2.71  | C_unshiu_01348 | 66931  | 74214  | 7284  | 9.81  | 99.96 |
| scaffold00310 | 125161 | 126509 | 1349  | 0.5   | C_unshiu_00465 | 58426  | 59774  | 1349  | 0.66  | 100   |
| scaffold00310 | 131414 | 132728 | 1315  | 0.49  | C_unshiu_01239 | 75688  | 76999  | 1312  | 1.6   | 98.56 |
| scaffold00310 | 131493 | 132799 | 1307  | 0.49  | C_unshiu_01127 | 71237  | 72540  | 1304  | 1.4   | 98.17 |
| scaffold00310 | 135100 | 136255 | 1156  | 0.43  | C_unshiu_01806 | 21131  | 22287  | 1157  | 2.4   | 98.62 |
| scaffold00310 | 146655 | 147674 | 1020  | 0.38  | C_unshiu_01037 | 42132  | 41111  | 1022  | 1     | 98.43 |
| scaffold00310 | 154499 | 158938 | 4440  | 1.65  | C_unshiu_00760 | 101186 | 96744  | 4443  | 3.29  | 99.5  |
| scaffold00310 | 158957 | 161072 | 2116  | 0.79  | C_unshiu_01037 | 35570  | 33448  | 2123  | 2.07  | 98.17 |
| scaffold00310 | 163225 | 165383 | 2159  | 0.8   | C_unshiu_01127 | 2935   | 5093   | 2159  | 2.32  | 99.54 |
| scaffold00310 | 166231 | 172587 | 6357  | 2.36  | C_unshiu_01127 | 6319   | 12675  | 6357  | 6.84  | 99.73 |
| scaffold00310 | 178676 | 210936 | 32261 | 11.99 | C_unshiu_01127 | 17312  | 49489  | 32178 | 34.61 | 98.49 |
| scaffold00310 | 217376 | 232453 | 15078 | 5.61  | C_unshiu_01037 | 88053  | 72972  | 15082 | 14.69 | 99.34 |
| scaffold00310 | 233360 | 259340 | 25981 | 9.66  | C_unshiu_01037 | 71438  | 45535  | 25904 | 25.24 | 99.62 |
| scaffold00310 | 261139 | 262379 | 1241  | 0.46  | C_unshiu_01037 | 2979   | 4220   | 1242  | 1.21  | 98.55 |
| scaffold00310 | 264659 | 265731 | 1073  | 0.4   | C_unshiu_01037 | 5508   | 6580   | 1073  | 1.05  | 100   |
| scaffold00313 | 1      | 32786  | 32786 | 12.23 | C_unshiu_00164 | 297188 | 330002 | 32815 | 8.87  | 99.69 |
| scaffold00313 | 42615  | 46379  | 3765  | 1.4   | C_unshiu_00164 | 339006 | 342779 | 3774  | 1.02  | 98.33 |
| scaffold00313 | 48849  | 54536  | 5688  | 2.12  | C_unshiu_01921 | 43959  | 38272  | 5688  | 12.94 | 99.84 |
| scaffold00313 | 67166  | 69412  | 2247  | 0.84  | C_unshiu_00164 | 352997 | 355243 | 2247  | 0.61  | 100   |
| scaffold00313 | 69408  | 71756  | 2349  | 0.88  | C_unshiu_00083 | 113352 | 115700 | 2349  | 0.5   | 100   |

|               |        |        |       |      |                |        |        |       |       |       |
|---------------|--------|--------|-------|------|----------------|--------|--------|-------|-------|-------|
| scaffold00313 | 71757  | 83720  | 11964 | 4.46 | C_unshiu_00164 | 357939 | 369907 | 11969 | 3.24  | 99.72 |
| scaffold00313 | 80025  | 90572  | 10548 | 3.94 | C_unshiu_01921 | 31737  | 21170  | 10568 | 24.04 | 98.98 |
| scaffold00313 | 92633  | 103057 | 10425 | 3.89 | C_unshiu_01825 | 11087  | 21527  | 10441 | 22    | 99.09 |
| scaffold00313 | 107320 | 109987 | 2668  | 1    | C_unshiu_01825 | 25424  | 28091  | 2668  | 5.62  | 100   |
| scaffold00313 | 110572 | 112009 | 1438  | 0.54 | C_unshiu_01825 | 29102  | 30539  | 1438  | 3.03  | 100   |
| scaffold00313 | 115621 | 122081 | 6461  | 2.41 | C_unshiu_01825 | 47459  | 41084  | 6376  | 13.43 | 98.35 |
| scaffold00313 | 118013 | 128625 | 10613 | 3.96 | C_unshiu_01259 | 80106  | 69527  | 10580 | 13.21 | 98.3  |
| scaffold00313 | 130677 | 132964 | 2288  | 0.85 | C_unshiu_01921 | 10343  | 8056   | 2288  | 5.2   | 100   |
| scaffold00313 | 165207 | 168954 | 3748  | 1.4  | C_unshiu_03139 | 6506   | 2761   | 3746  | 57.58 | 99.63 |
| scaffold00313 | 168088 | 189753 | 21666 | 8.08 | C_unshiu_01259 | 49314  | 27615  | 21700 | 27.09 | 99.03 |
| scaffold00313 | 189753 | 194893 | 5141  | 1.92 | C_unshiu_02836 | 7730   | 2590   | 5141  | 30.2  | 99.82 |
| scaffold00313 | 208499 | 211306 | 2808  | 1.05 | C_unshiu_01441 | 48208  | 45431  | 2778  | 4.12  | 98.54 |
| scaffold00313 | 212820 | 215972 | 3153  | 1.18 | C_unshiu_01324 | 70394  | 73543  | 3150  | 4.18  | 99.87 |
| scaffold00313 | 221219 | 229561 | 8343  | 3.11 | C_unshiu_02027 | 244    | 8585   | 8342  | 21.06 | 99.94 |
| scaffold00313 | 229742 | 231762 | 2021  | 0.75 | C_unshiu_02027 | 8979   | 10999  | 2021  | 5.1   | 100   |
| scaffold00313 | 236215 | 243323 | 7109  | 2.65 | C_unshiu_02027 | 17972  | 25080  | 7109  | 17.95 | 100   |
| scaffold00313 | 243341 | 245691 | 2351  | 0.88 | C_unshiu_02027 | 25427  | 27777  | 2351  | 5.93  | 100   |
| scaffold00313 | 246059 | 257103 | 11045 | 4.12 | C_unshiu_02027 | 28557  | 39614  | 11058 | 27.91 | 99.75 |
| scaffold00313 | 261168 | 262977 | 1810  | 0.68 | C_unshiu_00806 | 73090  | 71274  | 1817  | 1.42  | 98.9  |
| scaffold00313 | 263285 | 267985 | 4701  | 1.75 | C_unshiu_00806 | 70898  | 66204  | 4695  | 3.68  | 98.73 |
| scaffold00314 | 1      | 1213   | 1213  | 0.45 | C_unshiu_00819 | 86448  | 85236  | 1213  | 0.96  | 99.51 |
| scaffold00314 | 2406   | 4301   | 1896  | 0.71 | C_unshiu_00243 | 130989 | 129094 | 1896  | 0.63  | 99.63 |
| scaffold00314 | 19176  | 21425  | 2250  | 0.84 | C_unshiu_01964 | 11442  | 9193   | 2250  | 5.35  | 99.47 |
| scaffold00314 | 20691  | 32083  | 11393 | 4.27 | C_unshiu_00243 | 112514 | 101118 | 11397 | 3.8   | 99.43 |
| scaffold00314 | 32785  | 46643  | 13859 | 5.19 | C_unshiu_00243 | 99627  | 85796  | 13832 | 4.61  | 98.63 |
| scaffold00314 | 46635  | 48437  | 1803  | 0.68 | C_unshiu_00243 | 84486  | 82684  | 1803  | 0.6   | 98.84 |
| scaffold00314 | 58625  | 62863  | 4239  | 1.59 | C_unshiu_00243 | 76632  | 72417  | 4216  | 1.4   | 98.28 |
| scaffold00314 | 64312  | 75997  | 11686 | 4.38 | C_unshiu_00243 | 72543  | 60852  | 11692 | 3.89  | 99.27 |
| scaffold00314 | 100506 | 111736 | 11231 | 4.21 | C_unshiu_00243 | 54161  | 42941  | 11221 | 3.74  | 98.43 |
| scaffold00314 | 113823 | 117384 | 3562  | 1.33 | C_unshiu_00243 | 42611  | 39077  | 3535  | 1.18  | 98.12 |
| scaffold00314 | 129419 | 142299 | 12881 | 4.83 | C_unshiu_00243 | 37177  | 24206  | 12972 | 4.32  | 98.86 |
| scaffold00314 | 142609 | 154510 | 11902 | 4.46 | C_unshiu_00243 | 23502  | 11602  | 11901 | 3.96  | 99    |
| scaffold00314 | 155332 | 174705 | 19374 | 7.26 | C_unshiu_00568 | 157346 | 137935 | 19412 | 11.12 | 99.24 |
| scaffold00314 | 174718 | 184825 | 10108 | 3.79 | C_unshiu_00568 | 137993 | 127851 | 10143 | 5.81  | 99.03 |
| scaffold00314 | 185855 | 192309 | 6455  | 2.42 | C_unshiu_00568 | 126154 | 119706 | 6449  | 3.69  | 98.53 |
| scaffold00314 | 193723 | 203075 | 9353  | 3.5  | C_unshiu_00568 | 117624 | 108300 | 9325  | 5.34  | 99.03 |
| scaffold00314 | 206856 | 225345 | 18490 | 6.93 | C_unshiu_01974 | 6564   | 25102  | 18539 | 44.58 | 99.14 |
| scaffold00314 | 223736 | 228463 | 4728  | 1.77 | C_unshiu_00568 | 96222  | 91515  | 4708  | 2.7   | 98.75 |
| scaffold00314 | 229124 | 233105 | 3982  | 1.49 | C_unshiu_01974 | 25862  | 29850  | 3989  | 9.59  | 99.55 |
| scaffold00314 | 233170 | 241541 | 8372  | 3.14 | C_unshiu_00568 | 86218  | 77851  | 8368  | 4.79  | 98.53 |
| scaffold00314 | 243174 | 251447 | 8274  | 3.1  | C_unshiu_00568 | 74013  | 65746  | 8268  | 4.73  | 99.09 |
| scaffold00314 | 255679 | 262459 | 6781  | 2.54 | C_unshiu_01287 | 11539  | 18315  | 6777  | 8.66  | 99.37 |
| scaffold00314 | 257249 | 263567 | 6319  | 2.37 | C_unshiu_00568 | 61556  | 55237  | 6320  | 3.62  | 99.64 |
| scaffold00314 | 264081 | 265235 | 1155  | 0.43 | C_unshiu_00112 | 158068 | 156914 | 1155  | 0.26  | 100   |
| scaffold00314 | 265453 | 266937 | 1485  | 0.56 | C_unshiu_00568 | 53036  | 51553  | 1484  | 0.85  | 99.12 |
| scaffold00316 | 975    | 2494   | 1520  | 0.57 | C_unshiu_01551 | 4052   | 2531   | 1522  | 2.52  | 98.55 |
| scaffold00316 | 35774  | 38772  | 2999  | 1.13 | C_unshiu_00876 | 15999  | 13001  | 2999  | 2.51  | 98.47 |
| scaffold00316 | 42622  | 46780  | 4159  | 1.57 | C_unshiu_00876 | 11887  | 7718   | 4170  | 3.48  | 98.95 |
| scaffold00316 | 82501  | 83801  | 1301  | 0.49 | C_unshiu_00514 | 1999   | 696    | 1304  | 0.7   | 99.46 |
| scaffold00316 | 84088  | 87109  | 3022  | 1.14 | C_unshiu_00084 | 82211  | 79190  | 3022  | 0.64  | 100   |
| scaffold00316 | 89785  | 91230  | 1446  | 0.54 | C_unshiu_01161 | 21280  | 19835  | 1446  | 1.61  | 98.13 |
| scaffold00316 | 93682  | 103521 | 9840  | 3.71 | C_unshiu_00084 | 75279  | 65441  | 9839  | 2.08  | 99.85 |
| scaffold00316 | 103542 | 105262 | 1721  | 0.65 | C_unshiu_00084 | 65282  | 63569  | 1714  | 0.36  | 99.48 |
| scaffold00316 | 124505 | 127455 | 2951  | 1.11 | C_unshiu_01161 | 2945   | 1      | 2945  | 3.28  | 99.42 |
| scaffold00316 | 134509 | 140074 | 5566  | 2.1  | C_unshiu_02066 | 38103  | 32539  | 5565  | 14.61 | 99.46 |
| scaffold00316 | 143296 | 151737 | 8442  | 3.18 | C_unshiu_01953 | 5898   | 14339  | 8442  | 19.85 | 100   |
| scaffold00316 | 151800 | 162647 | 10848 | 4.09 | C_unshiu_01953 | 14443  | 25290  | 10848 | 25.5  | 99.92 |
| scaffold00316 | 159870 | 181101 | 21232 | 8    | C_unshiu_02057 | 38349  | 17125  | 21225 | 55.32 | 99.88 |
| scaffold00316 | 182376 | 183848 | 1473  | 0.55 | C_unshiu_02057 | 15455  | 13983  | 1473  | 3.84  | 99.52 |
| scaffold00316 | 201332 | 209783 | 8452  | 3.18 | C_unshiu_00887 | 82144  | 90610  | 8467  | 7.13  | 99.49 |
| scaffold00316 | 227359 | 236997 | 9639  | 3.63 | C_unshiu_00887 | 106027 | 115626 | 9600  | 8.09  | 98.54 |
| scaffold00316 | 241239 | 243123 | 1885  | 0.71 | C_unshiu_00887 | 115819 | 117697 | 1879  | 1.58  | 99.15 |
| scaffold00316 | 257621 | 259189 | 1569  | 0.59 | C_unshiu_01463 | 23874  | 25444  | 1571  | 2.39  | 99.43 |
| scaffold00317 | 2567   | 5376   | 2810  | 1.06 | C_unshiu_02642 | 1106   | 3916   | 2811  | 13.33 | 99.96 |
| scaffold00317 | 13250  | 14947  | 1698  | 0.64 | C_unshiu_00235 | 267945 | 269631 | 1687  | 0.55  | 98.42 |
| scaffold00317 | 54112  | 60961  | 6850  | 2.58 | C_unshiu_00235 | 284096 | 277256 | 6841  | 2.24  | 99.68 |
| scaffold00317 | 61270  | 68902  | 7633  | 2.88 | C_unshiu_00615 | 161207 | 153603 | 7605  | 4.63  | 98.5  |
| scaffold00317 | 69297  | 70544  | 1248  | 0.47 | C_unshiu_00615 | 152611 | 151364 | 1248  | 0.76  | 100   |
| scaffold00317 | 79320  | 102974 | 23655 | 8.92 | C_unshiu_00615 | 143665 | 119919 | 23747 | 14.46 | 98.14 |
| scaffold00317 | 103208 | 112367 | 9160  | 3.45 | C_unshiu_00615 | 119182 | 110024 | 9159  | 5.58  | 99.72 |
| scaffold00317 | 112531 | 125520 | 12990 | 4.9  | C_unshiu_00615 | 109910 | 96923  | 12988 | 7.91  | 98.72 |
| scaffold00317 | 126569 | 143687 | 17119 | 6.45 | C_unshiu_00615 | 96924  | 79807  | 17118 | 10.43 | 98.86 |
| scaffold00317 | 186882 | 189266 | 2385  | 0.9  | C_unshiu_00615 | 36091  | 33703  | 2389  | 1.46  | 98.45 |
| scaffold00317 | 201320 | 208747 | 7428  | 2.8  | C_unshiu_00615 | 7432   | 1      | 7432  | 4.53  | 98.06 |
| scaffold00317 | 210578 | 220351 | 9774  | 3.68 | C_unshiu_01838 | 34175  | 24376  | 9800  | 20.85 | 99.35 |
| scaffold00317 | 220404 | 224563 | 4160  | 1.57 | C_unshiu_01838 | 24120  | 19957  | 4164  | 8.86  | 99.83 |
| scaffold00317 | 225135 | 226526 | 1392  | 0.52 | C_unshiu_01838 | 18925  | 17534  | 1392  | 2.96  | 100   |
| scaffold00317 | 241783 | 251438 | 9656  | 3.64 | C_unshiu_00744 | 53805  | 63453  | 9649  | 7.03  | 99.16 |
| scaffold00317 | 252127 | 265014 | 12888 | 4.86 | C_unshiu_00744 | 64482  | 77369  | 12888 | 9.39  | 99.95 |

|               |        |        |        |       |                |        |        |        |       |       |
|---------------|--------|--------|--------|-------|----------------|--------|--------|--------|-------|-------|
| scaffold00319 | 810    | 8440   | 7631   | 2.89  | C_unshiu_00633 | 100039 | 92410  | 7630   | 4.76  | 99.83 |
| scaffold00319 | 8369   | 10751  | 2383   | 0.9   | C_unshiu_00633 | 92436  | 90054  | 2383   | 1.49  | 100   |
| scaffold00319 | 10760  | 12074  | 1315   | 0.5   | C_unshiu_00633 | 89839  | 88525  | 1315   | 0.82  | 100   |
| scaffold00319 | 13803  | 16170  | 2368   | 0.9   | C_unshiu_00633 | 86305  | 83938  | 2368   | 1.48  | 100   |
| scaffold00319 | 16903  | 20440  | 3538   | 1.34  | C_unshiu_00633 | 82726  | 79180  | 3547   | 2.21  | 98.54 |
| scaffold00319 | 20451  | 22408  | 1958   | 0.74  | C_unshiu_00633 | 78782  | 76825  | 1958   | 1.22  | 99.8  |
| scaffold00319 | 26610  | 49275  | 22666  | 8.57  | C_unshiu_00633 | 72754  | 50152  | 22603  | 14.1  | 98.87 |
| scaffold00319 | 51500  | 62965  | 11466  | 4.33  | C_unshiu_00633 | 47127  | 35612  | 11516  | 7.19  | 98.24 |
| scaffold00319 | 62966  | 69305  | 6340   | 2.4   | C_unshiu_00633 | 35678  | 29339  | 6340   | 3.96  | 99.75 |
| scaffold00319 | 76102  | 80935  | 4834   | 1.83  | C_unshiu_00633 | 20070  | 15222  | 4849   | 3.03  | 98.78 |
| scaffold00319 | 97434  | 99296  | 1863   | 0.7   | C_unshiu_02668 | 20183  | 18321  | 1863   | 9.06  | 99.73 |
| scaffold00319 | 100397 | 117451 | 17055  | 6.45  | C_unshiu_02668 | 17154  | 132    | 17023  | 82.75 | 98.92 |
| scaffold00319 | 119555 | 121331 | 1777   | 0.67  | C_unshiu_00812 | 46354  | 48131  | 1778   | 1.4   | 99.16 |
| scaffold00319 | 126864 | 130207 | 3344   | 1.26  | C_unshiu_00812 | 54641  | 57984  | 3344   | 2.63  | 99.79 |
| scaffold00319 | 130726 | 132471 | 1746   | 0.66  | C_unshiu_00812 | 58927  | 60672  | 1746   | 1.37  | 100   |
| scaffold00319 | 134414 | 135898 | 1485   | 0.56  | C_unshiu_00812 | 63058  | 64542  | 1485   | 1.17  | 99.8  |
| scaffold00319 | 135911 | 141862 | 5952   | 2.25  | C_unshiu_00812 | 64688  | 70640  | 5953   | 4.68  | 99.97 |
| scaffold00319 | 149636 | 156496 | 6861   | 2.59  | C_unshiu_00812 | 74190  | 81021  | 6832   | 5.37  | 99.48 |
| scaffold00319 | 160217 | 175828 | 15612  | 5.9   | C_unshiu_02195 | 28638  | 12938  | 15701  | 47.07 | 99.16 |
| scaffold00319 | 175885 | 188563 | 12679  | 4.79  | C_unshiu_02195 | 12791  | 70     | 12722  | 38.14 | 98.92 |
| scaffold00319 | 204706 | 206083 | 1378   | 0.52  | C_unshiu_00812 | 6918   | 8295   | 1378   | 1.08  | 100   |
| scaffold00319 | 207072 | 216059 | 8988   | 3.4   | C_unshiu_00812 | 9553   | 18614  | 9062   | 7.12  | 99.02 |
| scaffold00319 | 217841 | 225508 | 7668   | 2.9   | C_unshiu_00812 | 17251  | 24959  | 7709   | 6.06  | 98.08 |
| scaffold00319 | 231511 | 233076 | 1566   | 0.59  | C_unshiu_00812 | 28113  | 29682  | 1570   | 1.23  | 98.79 |
| scaffold00319 | 235130 | 236138 | 1009   | 0.38  | C_unshiu_00812 | 30209  | 31217  | 1009   | 0.79  | 100   |
| scaffold00319 | 236300 | 238325 | 2026   | 0.77  | C_unshiu_00812 | 32134  | 34159  | 2026   | 1.59  | 100   |
| scaffold00319 | 254392 | 255608 | 1217   | 0.46  | C_unshiu_00021 | 23443  | 24659  | 1217   | 0.16  | 99.01 |
| scaffold00322 | 754    | 1807   | 1054   | 0.41  | C_unshiu_00094 | 195142 | 194089 | 1054   | 0.23  | 100   |
| scaffold00322 | 7406   | 9559   | 2154   | 0.83  | C_unshiu_01703 | 36443  | 34283  | 2161   | 4.14  | 99.03 |
| scaffold00322 | 10215  | 20620  | 10406  | 4.03  | C_unshiu_01703 | 33591  | 23125  | 10467  | 20.03 | 98.38 |
| scaffold00322 | 23177  | 26070  | 2894   | 1.12  | C_unshiu_01703 | 22955  | 20062  | 2894   | 5.54  | 100   |
| scaffold00322 | 26261  | 29721  | 3461   | 1.34  | C_unshiu_01703 | 19793  | 16343  | 3451   | 6.6   | 99.48 |
| scaffold00322 | 30059  | 31168  | 1110   | 0.43  | C_unshiu_01703 | 16211  | 15102  | 1110   | 2.12  | 99.91 |
| scaffold00322 | 44368  | 47418  | 3051   | 1.18  | C_unshiu_00588 | 47681  | 44630  | 3052   | 1.8   | 99.97 |
| scaffold00322 | 48272  | 51253  | 2982   | 1.15  | C_unshiu_00588 | 43361  | 40370  | 2992   | 1.76  | 99.33 |
| scaffold00322 | 57769  | 62480  | 4712   | 1.82  | C_unshiu_00588 | 34635  | 29915  | 4721   | 2.78  | 98.9  |
| scaffold00322 | 63884  | 66772  | 2889   | 1.12  | C_unshiu_00588 | 29833  | 26946  | 2888   | 1.7   | 99.45 |
| scaffold00322 | 67416  | 70746  | 3331   | 1.29  | C_unshiu_00588 | 25719  | 22376  | 3344   | 1.97  | 98.69 |
| scaffold00322 | 70758  | 88279  | 17522  | 6.79  | C_unshiu_00588 | 21281  | 3760   | 17522  | 10.32 | 99.98 |
| scaffold00322 | 118661 | 124477 | 5817   | 2.25  | C_unshiu_01752 | 50388  | 44534  | 5855   | 11.62 | 98.31 |
| scaffold00322 | 124472 | 128941 | 4470   | 1.73  | C_unshiu_00219 | 74971  | 79440  | 4470   | 1.41  | 100   |
| scaffold00322 | 129308 | 140829 | 11522  | 4.46  | C_unshiu_01752 | 40460  | 28936  | 11525  | 22.87 | 99.78 |
| scaffold00322 | 140829 | 156032 | 15204  | 5.89  | C_unshiu_01752 | 28694  | 13377  | 15318  | 30.4  | 98.93 |
| scaffold00322 | 161418 | 172786 | 11369  | 4.4   | C_unshiu_00145 | 1      | 11369  | 11369  | 2.87  | 100   |
| scaffold00322 | 179166 | 190995 | 11830  | 4.58  | C_unshiu_00145 | 17492  | 29301  | 11810  | 2.98  | 99.74 |
| scaffold00322 | 209947 | 211995 | 2049   | 0.79  | C_unshiu_00145 | 46468  | 48516  | 2049   | 0.52  | 99.37 |
| scaffold00322 | 212150 | 214342 | 2193   | 0.85  | C_unshiu_00145 | 49056  | 51243  | 2188   | 0.55  | 99.27 |
| scaffold00322 | 214494 | 217059 | 2566   | 0.99  | C_unshiu_00145 | 51603  | 54168  | 2566   | 0.65  | 99.88 |
| scaffold00322 | 220837 | 246358 | 25522  | 9.88  | C_unshiu_00104 | 116200 | 141568 | 25369  | 5.62  | 98.81 |
| scaffold00322 | 248690 | 252925 | 4236   | 1.64  | C_unshiu_01676 | 35330  | 39565  | 4236   | 7.87  | 100   |
| scaffold00322 | 252920 | 254038 | 1119   | 0.43  | C_unshiu_00104 | 147470 | 148575 | 1106   | 0.25  | 98.12 |
| scaffold00322 | 254786 | 257978 | 3193   | 1.24  | C_unshiu_00104 | 149684 | 152878 | 3195   | 0.71  | 99.72 |
| scaffold00323 | 1      | 11044  | 11044  | 4.28  | C_unshiu_01849 | 32302  | 21261  | 11042  | 23.76 | 99.93 |
| scaffold00323 | 9800   | 13201  | 3402   | 1.32  | C_unshiu_01849 | 36289  | 32877  | 3413   | 7.34  | 98.07 |
| scaffold00323 | 14352  | 17935  | 3584   | 1.39  | C_unshiu_01849 | 20632  | 17048  | 3585   | 7.71  | 99.53 |
| scaffold00323 | 18752  | 29727  | 10976  | 4.25  | C_unshiu_01849 | 15762  | 4776   | 10987  | 23.64 | 99.33 |
| scaffold00323 | 36504  | 37546  | 1043   | 0.4   | C_unshiu_00568 | 38931  | 39973  | 1043   | 0.6   | 99.9  |
| scaffold00323 | 37705  | 46981  | 9277   | 3.59  | C_unshiu_00568 | 40242  | 49497  | 9256   | 5.3   | 99.17 |
| scaffold00323 | 62516  | 75653  | 13138  | 5.09  | C_unshiu_01257 | 44     | 13153  | 13110  | 16.31 | 99.51 |
| scaffold00323 | 77947  | 85195  | 7249   | 2.81  | C_unshiu_01257 | 15821  | 23069  | 7249   | 9.02  | 99.2  |
| scaffold00323 | 98712  | 100961 | 2250   | 0.87  | C_unshiu_01257 | 36708  | 38975  | 2268   | 2.82  | 98.07 |
| scaffold00323 | 119749 | 120947 | 1199   | 0.46  | C_unshiu_01257 | 59124  | 60325  | 1202   | 1.5   | 99.75 |
| scaffold00323 | 122842 | 129042 | 6201   | 2.4   | C_unshiu_01214 | 63408  | 69574  | 6167   | 7.33  | 98.68 |
| scaffold00323 | 136462 | 140003 | 3542   | 1.37  | C_unshiu_00157 | 353820 | 350278 | 3543   | 0.94  | 99.6  |
| scaffold00323 | 157781 | 159403 | 1623   | 0.63  | C_unshiu_00157 | 335188 | 333566 | 1623   | 0.43  | 99.51 |
| scaffold00323 | 162016 | 180872 | 18857  | 7.31  | C_unshiu_00157 | 332426 | 313485 | 18942  | 5.03  | 98.39 |
| scaffold00323 | 204097 | 213589 | 9493   | 3.68  | C_unshiu_00157 | 296370 | 286841 | 9530   | 2.53  | 98.3  |
| scaffold00323 | 233931 | 243624 | 9694   | 3.76  | C_unshiu_00157 | 265952 | 256206 | 9747   | 2.59  | 98.44 |
| scaffold00324 | 1      | 155831 | 155831 | 60.66 | C_unshiu_00033 | 244559 | 88721  | 155839 | 22.26 | 99.99 |
| scaffold00324 | 155910 | 237674 | 81765  | 31.83 | C_unshiu_00033 | 88469  | 6707   | 81763  | 11.68 | 99.99 |
| scaffold00324 | 238869 | 243929 | 5061   | 1.97  | C_unshiu_00033 | 5082   | 1      | 5082   | 0.73  | 98.88 |
| scaffold00324 | 240115 | 254691 | 14577  | 5.67  | C_unshiu_01003 | 34862  | 20286  | 14577  | 13.8  | 99.99 |
| scaffold00325 | 2396   | 4163   | 1768   | 0.69  | C_unshiu_03002 | 2997   | 4764   | 1768   | 13.7  | 99.72 |
| scaffold00325 | 16043  | 17943  | 1901   | 0.74  | C_unshiu_01217 | 13405  | 11505  | 1901   | 2.26  | 100   |
| scaffold00325 | 22701  | 23713  | 1013   | 0.39  | C_unshiu_00566 | 48973  | 49986  | 1014   | 0.58  | 99.11 |
| scaffold00325 | 24276  | 28736  | 4461   | 1.74  | C_unshiu_00473 | 97779  | 93319  | 4461   | 2.22  | 99.91 |
| scaffold00325 | 30954  | 33958  | 3005   | 1.17  | C_unshiu_00473 | 93318  | 90313  | 3006   | 1.5   | 99.37 |
| scaffold00325 | 30967  | 37632  | 6666   | 2.6   | C_unshiu_00390 | 222540 | 215897 | 6644   | 2.95  | 99.01 |
| scaffold00325 | 38003  | 40332  | 2330   | 0.91  | C_unshiu_00390 | 215081 | 212745 | 2337   | 1.04  | 99.44 |

|               |        |        |        |       |                |        |        |        |       |       |
|---------------|--------|--------|--------|-------|----------------|--------|--------|--------|-------|-------|
| scaffold00325 | 40389  | 46866  | 6478   | 2.53  | C_unshiu_00390 | 212394 | 205943 | 6452   | 2.86  | 98.94 |
| scaffold00325 | 64579  | 73437  | 8859   | 3.45  | C_unshiu_02353 | 28262  | 19404  | 8859   | 31.35 | 99.9  |
| scaffold00325 | 80364  | 82818  | 2455   | 0.96  | C_unshiu_02353 | 13110  | 10666  | 2445   | 8.65  | 99.51 |
| scaffold00325 | 83790  | 89326  | 5537   | 2.16  | C_unshiu_02353 | 9248   | 3712   | 5537   | 19.59 | 99.98 |
| scaffold00325 | 89503  | 93230  | 3728   | 1.45  | C_unshiu_02353 | 3711   | 1      | 3711   | 13.13 | 99.04 |
| scaffold00325 | 113849 | 116055 | 2207   | 0.86  | C_unshiu_00390 | 178991 | 176785 | 2207   | 0.98  | 99.95 |
| scaffold00325 | 116297 | 132400 | 16104  | 6.28  | C_unshiu_00390 | 175310 | 159179 | 16132  | 7.16  | 99.18 |
| scaffold00325 | 132392 | 145291 | 12900  | 5.03  | C_unshiu_00390 | 158399 | 145488 | 12912  | 5.73  | 99.52 |
| scaffold00325 | 153963 | 157865 | 3903   | 1.52  | C_unshiu_00390 | 136054 | 132145 | 3910   | 1.74  | 98.98 |
| scaffold00325 | 157864 | 161726 | 3863   | 1.51  | C_unshiu_00390 | 132207 | 128341 | 3867   | 1.72  | 99.3  |
| scaffold00325 | 161859 | 189763 | 27905  | 10.88 | C_unshiu_00390 | 127261 | 99273  | 27989  | 12.42 | 99.01 |
| scaffold00325 | 189674 | 209662 | 19989  | 7.79  | C_unshiu_00390 | 99317  | 79356  | 19962  | 8.86  | 98.87 |
| scaffold00325 | 210340 | 214502 | 4163   | 1.62  | C_unshiu_00390 | 78234  | 74057  | 4178   | 1.85  | 99    |
| scaffold00325 | 214757 | 219075 | 4319   | 1.68  | C_unshiu_00390 | 73428  | 69100  | 4329   | 1.92  | 98.52 |
| scaffold00325 | 219086 | 226092 | 7007   | 2.73  | C_unshiu_00390 | 68460  | 61455  | 7006   | 3.11  | 98.8  |
| scaffold00325 | 224489 | 231921 | 7433   | 2.9   | C_unshiu_00332 | 31083  | 38524  | 7442   | 2.96  | 99.8  |
| scaffold00325 | 234800 | 236987 | 2188   | 0.85  | C_unshiu_00390 | 40154  | 37970  | 2185   | 0.97  | 98.41 |
| scaffold00325 | 250822 | 254625 | 3804   | 1.48  | C_unshiu_00332 | 58303  | 62100  | 3798   | 1.51  | 98.53 |
| scaffold00326 | 184    | 11880  | 11697  | 4.58  | C_unshiu_01949 | 25811  | 37474  | 11664  | 27.27 | 98.44 |
| scaffold00326 | 18449  | 40442  | 21994  | 8.61  | C_unshiu_00428 | 216595 | 194622 | 21974  | 10.14 | 99.64 |
| scaffold00326 | 41680  | 59525  | 17846  | 6.99  | C_unshiu_00428 | 191678 | 173830 | 17849  | 8.24  | 99.87 |
| scaffold00326 | 59534  | 65426  | 5893   | 2.31  | C_unshiu_00428 | 173860 | 167968 | 5893   | 2.72  | 100   |
| scaffold00326 | 66933  | 68248  | 1316   | 0.52  | C_unshiu_00428 | 167828 | 166514 | 1315   | 0.61  | 99.32 |
| scaffold00326 | 70474  | 102442 | 31969  | 12.52 | C_unshiu_00428 | 163725 | 131762 | 31964  | 14.76 | 99.88 |
| scaffold00326 | 82440  | 232950 | 150511 | 58.92 | C_unshiu_00428 | 151758 | 1260   | 150499 | 69.48 | 99.99 |
| scaffold00326 | 232944 | 235977 | 3034   | 1.19  | C_unshiu_01209 | 68408  | 65375  | 3034   | 3.58  | 100   |
| scaffold00326 | 236943 | 246057 | 9115   | 3.57  | C_unshiu_02739 | 3177   | 12287  | 9111   | 47.45 | 99.87 |
| scaffold00328 | 1830   | 5162   | 3333   | 1.31  | C_unshiu_01015 | 53596  | 50264  | 3333   | 3.19  | 100   |
| scaffold00328 | 23573  | 26749  | 3177   | 1.25  | C_unshiu_00371 | 456    | 3636   | 3181   | 1.37  | 98.55 |
| scaffold00328 | 29409  | 33753  | 4345   | 1.71  | C_unshiu_00371 | 5295   | 9645   | 4351   | 1.87  | 99.1  |
| scaffold00328 | 35819  | 44366  | 8548   | 3.36  | C_unshiu_00371 | 10921  | 19462  | 8542   | 3.67  | 98.06 |
| scaffold00328 | 45303  | 54977  | 9675   | 3.81  | C_unshiu_00371 | 19148  | 28826  | 9679   | 4.16  | 99.25 |
| scaffold00328 | 82690  | 86257  | 3568   | 1.4   | C_unshiu_00371 | 57238  | 60822  | 3585   | 1.54  | 98.8  |
| scaffold00328 | 94083  | 116120 | 22038  | 8.67  | C_unshiu_00371 | 68846  | 90901  | 22056  | 9.48  | 99.29 |
| scaffold00328 | 116746 | 118822 | 2077   | 0.82  | C_unshiu_00371 | 92124  | 94209  | 2086   | 0.9   | 98.85 |
| scaffold00328 | 126658 | 141324 | 14667  | 5.77  | C_unshiu_00371 | 103527 | 118226 | 14700  | 6.32  | 98.64 |
| scaffold00328 | 141336 | 144137 | 2802   | 1.1   | C_unshiu_00371 | 118550 | 121353 | 2804   | 1.21  | 99.07 |
| scaffold00328 | 144164 | 154471 | 10308  | 4.06  | C_unshiu_00371 | 121616 | 131931 | 10316  | 4.44  | 99.14 |
| scaffold00328 | 157976 | 186371 | 28396  | 11.17 | C_unshiu_00371 | 136126 | 164754 | 28629  | 12.31 | 98.24 |
| scaffold00328 | 189693 | 192908 | 3216   | 1.27  | C_unshiu_00371 | 165784 | 168997 | 3214   | 1.38  | 98.26 |
| scaffold00328 | 194240 | 197506 | 3267   | 1.29  | C_unshiu_00371 | 168995 | 172265 | 3271   | 1.41  | 99.79 |
| scaffold00328 | 200737 | 201849 | 1113   | 0.44  | C_unshiu_03127 | 7417   | 6306   | 1112   | 14.99 | 98.56 |
| scaffold00332 | 1      | 2744   | 2744   | 1.09  | C_unshiu_01327 | 36820  | 39592  | 2773   | 3.68  | 98.06 |
| scaffold00332 | 4678   | 12234  | 7557   | 3     | C_unshiu_01314 | 68467  | 76026  | 7560   | 9.94  | 98.85 |
| scaffold00332 | 18116  | 19954  | 1839   | 0.73  | C_unshiu_01327 | 66627  | 68462  | 1836   | 2.44  | 98.42 |
| scaffold00332 | 24771  | 27580  | 2810   | 1.12  | C_unshiu_01327 | 72449  | 75258  | 2810   | 3.73  | 99.96 |
| scaffold00332 | 41522  | 43340  | 1819   | 0.72  | C_unshiu_01683 | 40234  | 38415  | 1820   | 3.41  | 98.57 |
| scaffold00332 | 43329  | 76296  | 32968  | 13.09 | C_unshiu_01683 | 37209  | 4243   | 32967  | 61.84 | 99.8  |
| scaffold00332 | 78103  | 88185  | 10083  | 4     | C_unshiu_00339 | 42238  | 52333  | 10096  | 4.04  | 98.21 |
| scaffold00332 | 88649  | 90161  | 1513   | 0.6   | C_unshiu_00339 | 53093  | 54604  | 1512   | 0.61  | 99.07 |
| scaffold00332 | 95482  | 153279 | 57798  | 22.96 | C_unshiu_00339 | 59661  | 117448 | 57788  | 23.15 | 99.47 |
| scaffold00332 | 154782 | 163045 | 8264   | 3.28  | C_unshiu_00339 | 119500 | 127766 | 8267   | 3.31  | 99.92 |
| scaffold00332 | 163143 | 173298 | 10156  | 4.03  | C_unshiu_00339 | 127903 | 138069 | 10167  | 4.07  | 99.64 |
| scaffold00332 | 173358 | 180022 | 6665   | 2.65  | C_unshiu_00339 | 138943 | 145583 | 6641   | 2.66  | 98.67 |
| scaffold00332 | 180024 | 184601 | 4578   | 1.82  | C_unshiu_00339 | 145482 | 150054 | 4573   | 1.83  | 99.54 |
| scaffold00332 | 184998 | 220547 | 35550  | 14.12 | C_unshiu_00339 | 150822 | 186386 | 35565  | 14.25 | 99.75 |
| scaffold00332 | 221960 | 243206 | 21247  | 8.44  | C_unshiu_00339 | 187479 | 208722 | 21244  | 8.51  | 99.61 |
| scaffold00332 | 243388 | 245470 | 2083   | 0.83  | C_unshiu_00008 | 545314 | 547398 | 2085   | 0.19  | 99.76 |
| scaffold00332 | 245596 | 247665 | 2070   | 0.82  | C_unshiu_00008 | 547032 | 549103 | 2072   | 0.19  | 99.33 |
| scaffold00332 | 249532 | 251091 | 1560   | 0.62  | C_unshiu_02214 | 20882  | 19321  | 1562   | 4.76  | 99.55 |
| scaffold00332 | 249533 | 251189 | 1657   | 0.66  | C_unshiu_00008 | 549252 | 550921 | 1670   | 0.15  | 98.92 |
| scaffold00333 | 4239   | 7308   | 3070   | 1.22  | C_unshiu_02314 | 18971  | 22037  | 3067   | 10.39 | 98.86 |
| scaffold00333 | 7054   | 15334  | 8281   | 3.3   | C_unshiu_00485 | 90218  | 98523  | 8306   | 4.22  | 99    |
| scaffold00333 | 16918  | 18008  | 1091   | 0.43  | C_unshiu_00485 | 100345 | 101436 | 1092   | 0.55  | 98.81 |
| scaffold00333 | 26749  | 46848  | 20100  | 8     | C_unshiu_00485 | 108441 | 128555 | 20115  | 10.21 | 99.24 |
| scaffold00333 | 46860  | 51695  | 4836   | 1.93  | C_unshiu_00485 | 129252 | 134107 | 4856   | 2.47  | 98.39 |
| scaffold00333 | 57084  | 113273 | 56190  | 22.38 | C_unshiu_00485 | 137574 | 193890 | 56317  | 28.59 | 98.87 |
| scaffold00333 | 113291 | 117517 | 4227   | 1.68  | C_unshiu_03063 | 10886  | 6658   | 4229   | 38.85 | 99.93 |
| scaffold00333 | 117632 | 124148 | 6517   | 2.6   | C_unshiu_03063 | 6517   | 1      | 6517   | 59.87 | 99.98 |
| scaffold00333 | 124335 | 131201 | 6867   | 2.73  | C_unshiu_01890 | 12872  | 19738  | 6867   | 15.25 | 99.96 |
| scaffold00333 | 131186 | 150618 | 19433  | 7.74  | C_unshiu_02621 | 19376  | 1      | 19376  | 89.51 | 99.34 |
| scaffold00333 | 185920 | 190626 | 4707   | 1.87  | C_unshiu_01880 | 45353  | 40653  | 4701   | 10.37 | 99.64 |
| scaffold00333 | 189499 | 220954 | 31456  | 12.53 | C_unshiu_01880 | 32384  | 920    | 31465  | 69.38 | 99.63 |
| scaffold00333 | 231309 | 249552 | 18244  | 7.27  | C_unshiu_02107 | 33334  | 15053  | 18282  | 50.39 | 99.79 |
| scaffold00337 | 5092   | 6146   | 1055   | 0.43  | C_unshiu_02368 | 20410  | 19356  | 1055   | 3.78  | 100   |
| scaffold00337 | 22799  | 57074  | 34276  | 13.82 | C_unshiu_00479 | 195080 | 160729 | 34352  | 17.32 | 98.24 |
| scaffold00337 | 58722  | 61212  | 2491   | 1     | C_unshiu_00479 | 159603 | 157106 | 2498   | 1.26  | 98.92 |
| scaffold00337 | 80245  | 81585  | 1341   | 0.54  | C_unshiu_00479 | 136388 | 135048 | 1341   | 0.68  | 98.29 |
| scaffold00337 | 82371  | 126602 | 44232  | 17.84 | C_unshiu_00479 | 134044 | 89806  | 44239  | 22.31 | 99.98 |

|               |        |        |       |       |                |        |        |       |       |       |
|---------------|--------|--------|-------|-------|----------------|--------|--------|-------|-------|-------|
| scaffold00337 | 126602 | 186848 | 60247 | 24.29 | C_unshiu_00479 | 89706  | 29460  | 60247 | 30.38 | 99.98 |
| scaffold00337 | 187612 | 215909 | 28298 | 11.41 | C_unshiu_00479 | 28266  | 1      | 28266 | 14.25 | 99.82 |
| scaffold00337 | 225820 | 230100 | 4281  | 1.73  | C_unshiu_01017 | 68386  | 72663  | 4278  | 4.1   | 99.84 |
| scaffold00337 | 230090 | 245901 | 15812 | 6.38  | C_unshiu_01017 | 86274  | 102085 | 15812 | 15.16 | 99.99 |
| scaffold00337 | 245886 | 247777 | 1892  | 0.76  | C_unshiu_01017 | 102228 | 104119 | 1892  | 1.81  | 100   |
| scaffold00339 | 594    | 5710   | 5117  | 2.08  | C_unshiu_00308 | 115573 | 110474 | 5100  | 1.95  | 98.34 |
| scaffold00339 | 11283  | 18007  | 6725  | 2.73  | C_unshiu_00308 | 104885 | 98161  | 6725  | 2.57  | 99.99 |
| scaffold00339 | 18162  | 25150  | 6989  | 2.83  | C_unshiu_00308 | 97657  | 90662  | 6996  | 2.67  | 99.59 |
| scaffold00339 | 30529  | 46135  | 15607 | 6.33  | C_unshiu_00308 | 85854  | 70280  | 15575 | 5.95  | 99.51 |
| scaffold00339 | 49883  | 60541  | 10659 | 4.32  | C_unshiu_00308 | 67244  | 56585  | 10660 | 4.07  | 99.93 |
| scaffold00339 | 66560  | 116528 | 49969 | 20.26 | C_unshiu_00308 | 51297  | 1450   | 49848 | 19.05 | 99.49 |
| scaffold00339 | 116566 | 117656 | 1091  | 0.44  | C_unshiu_00620 | 37196  | 38289  | 1094  | 0.67  | 98.54 |
| scaffold00339 | 123935 | 126747 | 2813  | 1.14  | C_unshiu_00646 | 1      | 2813   | 2813  | 1.78  | 100   |
| scaffold00339 | 128406 | 143612 | 15207 | 6.17  | C_unshiu_00610 | 65091  | 49982  | 15110 | 9.16  | 98.82 |
| scaffold00339 | 146947 | 148850 | 1904  | 0.77  | C_unshiu_02332 | 23579  | 21677  | 1903  | 6.6   | 99.95 |
| scaffold00339 | 149136 | 150328 | 1193  | 0.48  | C_unshiu_02332 | 24862  | 23670  | 1193  | 4.14  | 100   |
| scaffold00339 | 150346 | 152955 | 2610  | 1.06  | C_unshiu_02332 | 20501  | 17890  | 2612  | 9.06  | 99.81 |
| scaffold00339 | 152961 | 156150 | 3190  | 1.29  | C_unshiu_02332 | 16048  | 12859  | 3190  | 11.06 | 99.22 |
| scaffold00339 | 157012 | 159193 | 2182  | 0.88  | C_unshiu_02332 | 10704  | 8523   | 2182  | 7.56  | 100   |
| scaffold00339 | 161700 | 166440 | 4741  | 1.92  | C_unshiu_02332 | 4739   | 1      | 4739  | 16.43 | 99.62 |
| scaffold00339 | 165216 | 169125 | 3910  | 1.59  | C_unshiu_00610 | 85068  | 89004  | 3937  | 2.39  | 98.55 |
| scaffold00339 | 169328 | 173437 | 4110  | 1.67  | C_unshiu_00610 | 88996  | 93105  | 4110  | 2.49  | 99.98 |
| scaffold00339 | 173429 | 176625 | 3197  | 1.3   | C_unshiu_00610 | 93786  | 96977  | 3192  | 1.93  | 99.47 |
| scaffold00339 | 186501 | 195122 | 8622  | 3.5   | C_unshiu_00610 | 104449 | 113061 | 8613  | 5.22  | 99.43 |
| scaffold00339 | 195131 | 196427 | 1297  | 0.53  | C_unshiu_00601 | 112236 | 110940 | 1297  | 0.77  | 99.92 |
| scaffold00339 | 195131 | 196427 | 1297  | 0.53  | C_unshiu_00610 | 113593 | 114891 | 1299  | 0.79  | 98.15 |
| scaffold00339 | 196593 | 198073 | 1481  | 0.6   | C_unshiu_00610 | 115396 | 116876 | 1481  | 0.9   | 100   |
| scaffold00339 | 198938 | 202815 | 3878  | 1.57  | C_unshiu_00601 | 107860 | 103996 | 3865  | 2.31  | 99.41 |
| scaffold00339 | 203779 | 232752 | 28974 | 11.75 | C_unshiu_00601 | 103088 | 74056  | 29033 | 17.32 | 99.34 |
| scaffold00339 | 232768 | 235587 | 2820  | 1.14  | C_unshiu_00601 | 73317  | 70500  | 2818  | 1.68  | 99.65 |
| scaffold00339 | 240161 | 241163 | 1003  | 0.41  | C_unshiu_00601 | 69878  | 68869  | 1010  | 0.6   | 98.32 |
| scaffold00339 | 241901 | 243616 | 1716  | 0.7   | C_unshiu_00601 | 14867  | 13150  | 1718  | 1.03  | 99.71 |
| scaffold00339 | 243618 | 244643 | 1026  | 0.42  | C_unshiu_00601 | 67154  | 66128  | 1027  | 0.61  | 99.9  |
| scaffold00340 | 683    | 2250   | 1568  | 0.64  | C_unshiu_01064 | 46171  | 47740  | 1570  | 1.59  | 99.55 |
| scaffold00340 | 3588   | 5544   | 1957  | 0.79  | C_unshiu_00144 | 305589 | 307545 | 1957  | 0.49  | 100   |
| scaffold00340 | 17738  | 36202  | 18465 | 7.5   | C_unshiu_01064 | 53134  | 71611  | 18478 | 18.67 | 99.86 |
| scaffold00340 | 38139  | 39297  | 1159  | 0.47  | C_unshiu_01064 | 44869  | 46027  | 1159  | 1.17  | 99.48 |
| scaffold00340 | 39541  | 47649  | 8109  | 3.29  | C_unshiu_01064 | 72727  | 80820  | 8094  | 8.18  | 99.54 |
| scaffold00340 | 47644  | 48873  | 1230  | 0.5   | C_unshiu_00054 | 27048  | 25819  | 1230  | 0.21  | 100   |
| scaffold00340 | 48955  | 51456  | 2502  | 1.02  | C_unshiu_01631 | 26503  | 24034  | 2470  | 4.42  | 98.24 |
| scaffold00340 | 67418  | 69248  | 1831  | 0.74  | C_unshiu_01631 | 7998   | 6173   | 1826  | 3.27  | 99.34 |
| scaffold00340 | 74204  | 75320  | 1117  | 0.45  | C_unshiu_01490 | 57179  | 58295  | 1117  | 1.75  | 99.55 |
| scaffold00340 | 79511  | 86655  | 7145  | 2.9   | C_unshiu_00082 | 4242   | 11417  | 7176  | 1.52  | 99.19 |
| scaffold00340 | 86650  | 98603  | 11954 | 4.85  | C_unshiu_00082 | 11673  | 23608  | 11936 | 2.52  | 99.82 |
| scaffold00340 | 98748  | 119920 | 21173 | 8.59  | C_unshiu_00082 | 24138  | 45408  | 21271 | 4.49  | 99.02 |
| scaffold00340 | 119936 | 123358 | 3423  | 1.39  | C_unshiu_00082 | 45378  | 48802  | 3425  | 0.72  | 98.4  |
| scaffold00340 | 124047 | 142774 | 18728 | 7.6   | C_unshiu_00082 | 50123  | 68841  | 18719 | 3.95  | 99.88 |
| scaffold00340 | 142767 | 153553 | 10787 | 4.38  | C_unshiu_00082 | 69830  | 80617  | 10788 | 2.28  | 99.9  |
| scaffold00340 | 158906 | 202300 | 43395 | 17.62 | C_unshiu_00082 | 86923  | 130236 | 43314 | 9.15  | 99.47 |
| scaffold00340 | 203461 | 222001 | 18541 | 7.53  | C_unshiu_00082 | 132146 | 150715 | 18570 | 3.92  | 99.8  |
| scaffold00340 | 222216 | 239264 | 17049 | 6.92  | C_unshiu_00082 | 151289 | 168338 | 17050 | 3.6   | 99.74 |
| scaffold00342 | 1      | 3252   | 3252  | 1.33  | C_unshiu_00279 | 34077  | 37333  | 3257  | 1.17  | 99.72 |
| scaffold00342 | 3247   | 5408   | 2162  | 0.89  | C_unshiu_00269 | 78151  | 75990  | 2162  | 0.77  | 100   |
| scaffold00342 | 12142  | 13484  | 1343  | 0.55  | C_unshiu_00673 | 103748 | 102406 | 1343  | 0.89  | 100   |
| scaffold00342 | 13618  | 14719  | 1102  | 0.45  | C_unshiu_00279 | 56092  | 57188  | 1097  | 0.4   | 99.18 |
| scaffold00342 | 17409  | 20158  | 2750  | 1.13  | C_unshiu_01164 | 25809  | 28558  | 2750  | 3.07  | 100   |
| scaffold00342 | 30393  | 39771  | 9379  | 3.84  | C_unshiu_00279 | 78490  | 87874  | 9385  | 3.38  | 98.51 |
| scaffold00342 | 39932  | 51946  | 12015 | 4.92  | C_unshiu_00279 | 88513  | 100557 | 12045 | 4.34  | 98.15 |
| scaffold00342 | 74110  | 75458  | 1349  | 0.55  | C_unshiu_00279 | 113861 | 115211 | 1351  | 0.49  | 98.67 |
| scaffold00342 | 76775  | 83212  | 6438  | 2.64  | C_unshiu_00279 | 115202 | 121584 | 6383  | 2.3   | 98.33 |
| scaffold00342 | 95333  | 107304 | 11972 | 4.91  | C_unshiu_00279 | 133910 | 145906 | 11997 | 4.32  | 98.54 |
| scaffold00342 | 112924 | 118762 | 5839  | 2.39  | C_unshiu_00279 | 151365 | 157208 | 5844  | 2.11  | 99.23 |
| scaffold00342 | 134508 | 162050 | 27543 | 11.29 | C_unshiu_00279 | 172576 | 200122 | 27547 | 9.93  | 99.02 |
| scaffold00342 | 196245 | 206819 | 10575 | 4.33  | C_unshiu_00279 | 227276 | 237909 | 10634 | 3.83  | 98.24 |
| scaffold00343 | 2110   | 8335   | 6226  | 2.55  | C_unshiu_00171 | 52568  | 46351  | 6218  | 1.69  | 99.29 |
| scaffold00343 | 10625  | 25958  | 15334 | 6.28  | C_unshiu_02188 | 23542  | 8224   | 15319 | 45.52 | 99.51 |
| scaffold00343 | 25997  | 32761  | 6765  | 2.77  | C_unshiu_01673 | 53952  | 47195  | 6758  | 12.53 | 99.59 |
| scaffold00343 | 34443  | 37811  | 3369  | 1.38  | C_unshiu_01673 | 45912  | 42555  | 3358  | 6.22  | 99.41 |
| scaffold00343 | 38590  | 39822  | 1233  | 0.51  | C_unshiu_01673 | 41620  | 40387  | 1234  | 2.29  | 99.76 |
| scaffold00343 | 43633  | 60767  | 17135 | 7.02  | C_unshiu_01673 | 36399  | 19258  | 17142 | 31.77 | 99.76 |
| scaffold00343 | 78506  | 102170 | 23665 | 9.7   | C_unshiu_00360 | 230584 | 206929 | 23656 | 10.01 | 99.37 |
| scaffold00343 | 102311 | 111030 | 8720  | 3.57  | C_unshiu_00360 | 206545 | 197801 | 8745  | 3.7   | 99.29 |
| scaffold00343 | 111151 | 152283 | 41133 | 16.86 | C_unshiu_00360 | 197390 | 156291 | 41100 | 17.38 | 99.62 |
| scaffold00343 | 168031 | 172882 | 4852  | 1.99  | C_unshiu_01804 | 42740  | 37883  | 4858  | 10.04 | 99.46 |
| scaffold00343 | 172881 | 176291 | 3411  | 1.4   | C_unshiu_01804 | 37606  | 34195  | 3412  | 7.05  | 99.74 |
| scaffold00343 | 177571 | 201565 | 23995 | 9.83  | C_unshiu_01804 | 32495  | 8514   | 23982 | 49.58 | 99.81 |
| scaffold00343 | 202432 | 209699 | 7268  | 2.98  | C_unshiu_01804 | 7251   | 3      | 7249  | 14.99 | 99.16 |
| scaffold00343 | 215051 | 217716 | 2666  | 1.09  | C_unshiu_00818 | 66460  | 63795  | 2666  | 2.11  | 99.96 |
| scaffold00343 | 217717 | 220239 | 2523  | 1.03  | C_unshiu_01622 | 27275  | 24767  | 2509  | 4.44  | 98.38 |

|               |        |        |       |       |                |        |        |       |       |       |
|---------------|--------|--------|-------|-------|----------------|--------|--------|-------|-------|-------|
| scaffold00343 | 221096 | 242925 | 21830 | 8.95  | C_unshiu_01622 | 23271  | 1430   | 21842 | 38.62 | 99.1  |
| scaffold00345 | 16290  | 30399  | 14110 | 5.82  | C_unshiu_02813 | 1562   | 15627  | 14066 | 79.84 | 98.84 |
| scaffold00345 | 41009  | 42896  | 1888  | 0.78  | C_unshiu_01773 | 27670  | 29555  | 1886  | 3.81  | 98.99 |
| scaffold00345 | 42910  | 53060  | 10151 | 4.19  | C_unshiu_01773 | 31101  | 41195  | 10095 | 20.39 | 98.57 |
| scaffold00345 | 53247  | 55943  | 2697  | 1.11  | C_unshiu_01773 | 41195  | 43891  | 2697  | 5.45  | 99.04 |
| scaffold00345 | 55943  | 59588  | 3646  | 1.5   | C_unshiu_00517 | 176538 | 180177 | 3640  | 1.96  | 99.73 |
| scaffold00345 | 59583  | 60946  | 1364  | 0.56  | C_unshiu_00324 | 56175  | 57538  | 1364  | 0.54  | 100   |
| scaffold00345 | 91459  | 93590  | 2132  | 0.88  | C_unshiu_02603 | 1      | 2140   | 2140  | 9.73  | 98.09 |
| scaffold00345 | 91951  | 97847  | 5897  | 2.43  | C_unshiu_02549 | 1      | 5858   | 5858  | 25.16 | 98.18 |
| scaffold00345 | 100150 | 116001 | 15852 | 6.54  | C_unshiu_02549 | 7482   | 23281  | 15800 | 67.87 | 98.81 |
| scaffold00345 | 119805 | 121997 | 2193  | 0.9   | C_unshiu_02428 | 2129   | 4321   | 2193  | 8.2   | 99.64 |
| scaffold00345 | 123078 | 124846 | 1769  | 0.73  | C_unshiu_02428 | 5896   | 7664   | 1769  | 6.62  | 100   |
| scaffold00345 | 125819 | 132830 | 7012  | 2.89  | C_unshiu_00950 | 108206 | 101227 | 6980  | 6.26  | 99    |
| scaffold00345 | 127935 | 145331 | 17397 | 7.18  | C_unshiu_02428 | 9462   | 26731  | 17270 | 64.61 | 98.58 |
| scaffold00345 | 160829 | 174806 | 13978 | 5.77  | C_unshiu_02674 | 19557  | 5572   | 13986 | 68.58 | 98.84 |
| scaffold00345 | 174822 | 177556 | 2735  | 1.13  | C_unshiu_02674 | 5072   | 2338   | 2735  | 13.41 | 99.93 |
| scaffold00345 | 204662 | 209190 | 4529  | 1.87  | C_unshiu_00950 | 45982  | 41455  | 4528  | 4.06  | 99.21 |
| scaffold00345 | 210246 | 212153 | 1908  | 0.79  | C_unshiu_00950 | 40125  | 38213  | 1913  | 1.72  | 99.06 |
| scaffold00345 | 221947 | 228096 | 6150  | 2.54  | C_unshiu_00950 | 28598  | 22498  | 6101  | 5.47  | 98.31 |
| scaffold00345 | 234456 | 236571 | 2116  | 0.87  | C_unshiu_01084 | 87255  | 85139  | 2117  | 2.17  | 99.39 |
| scaffold00345 | 236590 | 238298 | 1709  | 0.71  | C_unshiu_01084 | 88226  | 86518  | 1709  | 1.75  | 100   |
| scaffold00345 | 238317 | 242351 | 4035  | 1.66  | C_unshiu_01084 | 85139  | 81102  | 4038  | 4.14  | 99.55 |
| scaffold00348 | 10615  | 12159  | 1545  | 0.65  | C_unshiu_01170 | 18428  | 16883  | 1546  | 1.75  | 99.81 |
| scaffold00348 | 12781  | 14817  | 2037  | 0.86  | C_unshiu_01170 | 15920  | 13885  | 2036  | 2.3   | 99.71 |
| scaffold00348 | 14837  | 16033  | 1197  | 0.51  | C_unshiu_01170 | 11529  | 10333  | 1197  | 1.35  | 99.75 |
| scaffold00348 | 16236  | 20296  | 4061  | 1.71  | C_unshiu_01463 | 60555  | 64621  | 4067  | 6.19  | 99.07 |
| scaffold00348 | 20886  | 22563  | 1678  | 0.71  | C_unshiu_00296 | 111021 | 109341 | 1681  | 0.63  | 98.99 |
| scaffold00348 | 24340  | 26282  | 1943  | 0.82  | C_unshiu_01170 | 2494   | 555    | 1940  | 2.19  | 98.71 |
| scaffold00348 | 26712  | 55394  | 28683 | 12.11 | C_unshiu_01378 | 36653  | 8012   | 28642 | 39.88 | 98.58 |
| scaffold00348 | 54833  | 59053  | 4221  | 1.78  | C_unshiu_00518 | 181110 | 176898 | 4213  | 2.27  | 98.93 |
| scaffold00348 | 68631  | 72326  | 3696  | 1.56  | C_unshiu_00518 | 171331 | 167625 | 3707  | 2     | 99.6  |
| scaffold00348 | 98299  | 103053 | 4755  | 2.01  | C_unshiu_00518 | 176199 | 171446 | 4754  | 2.56  | 98.4  |
| scaffold00348 | 103046 | 104629 | 1584  | 0.67  | C_unshiu_00329 | 59909  | 58326  | 1584  | 0.63  | 100   |
| scaffold00348 | 107936 | 112070 | 4135  | 1.75  | C_unshiu_00518 | 167588 | 163454 | 4135  | 2.23  | 99.88 |
| scaffold00348 | 114697 | 117356 | 2660  | 1.12  | C_unshiu_01011 | 12921  | 10262  | 2660  | 2.54  | 100   |
| scaffold00348 | 117351 | 123328 | 5978  | 2.52  | C_unshiu_00518 | 157104 | 151127 | 5978  | 3.22  | 99.82 |
| scaffold00348 | 125499 | 127617 | 2119  | 0.89  | C_unshiu_00518 | 148179 | 146061 | 2119  | 1.14  | 99.58 |
| scaffold00348 | 128443 | 131412 | 2970  | 1.25  | C_unshiu_00518 | 144576 | 141607 | 2970  | 1.6   | 100   |
| scaffold00348 | 139585 | 153221 | 13637 | 5.76  | C_unshiu_00518 | 133472 | 119789 | 13684 | 7.37  | 99.38 |
| scaffold00348 | 182216 | 183257 | 1042  | 0.44  | C_unshiu_00518 | 117567 | 116520 | 1048  | 0.56  | 99.05 |
| scaffold00348 | 183258 | 186275 | 3018  | 1.27  | C_unshiu_01650 | 1966   | 4983   | 3018  | 5.47  | 99.73 |
| scaffold00348 | 189585 | 191112 | 1528  | 0.64  | C_unshiu_01650 | 1      | 1528   | 1528  | 2.77  | 99.93 |
| scaffold00348 | 195339 | 233386 | 38048 | 16.06 | C_unshiu_01650 | 4901   | 42956  | 38056 | 69.03 | 99.98 |
| scaffold00348 | 234705 | 236914 | 2210  | 0.93  | C_unshiu_01650 | 44881  | 47090  | 2210  | 4.01  | 100   |
| scaffold00349 | 14153  | 15749  | 1597  | 0.68  | C_unshiu_00311 | 259661 | 258064 | 1598  | 0.61  | 99.94 |
| scaffold00349 | 16395  | 78918  | 62524 | 26.44 | C_unshiu_00311 | 257003 | 194480 | 62524 | 24.04 | 99.99 |
| scaffold00349 | 80937  | 134923 | 53987 | 22.83 | C_unshiu_00311 | 191910 | 138006 | 53905 | 20.73 | 99.77 |
| scaffold00349 | 162852 | 226486 | 63635 | 26.91 | C_unshiu_00178 | 280414 | 344051 | 63638 | 17.67 | 99.95 |
| scaffold00349 | 230343 | 236421 | 6079  | 2.57  | C_unshiu_00178 | 347430 | 353508 | 6079  | 1.69  | 99.95 |
| scaffold00350 | 1      | 7569   | 7569  | 3.2   | C_unshiu_00261 | 214153 | 206586 | 7568  | 2.64  | 99.75 |
| scaffold00350 | 7607   | 11138  | 3532  | 1.5   | C_unshiu_00261 | 206706 | 203163 | 3544  | 1.24  | 98.93 |
| scaffold00350 | 11135  | 16519  | 5385  | 2.28  | C_unshiu_00261 | 203053 | 197668 | 5386  | 1.88  | 98.83 |
| scaffold00350 | 17103  | 25265  | 8163  | 3.46  | C_unshiu_00261 | 197446 | 189321 | 8126  | 2.84  | 98.24 |
| scaffold00350 | 31720  | 40127  | 8408  | 3.56  | C_unshiu_00261 | 183414 | 175007 | 8408  | 2.94  | 99.96 |
| scaffold00350 | 46147  | 57148  | 11002 | 4.66  | C_unshiu_01845 | 1      | 10999  | 10999 | 23.55 | 99.81 |
| scaffold00350 | 58358  | 75003  | 16646 | 7.05  | C_unshiu_01845 | 12566  | 29211  | 16646 | 35.64 | 100   |
| scaffold00350 | 76157  | 83318  | 7162  | 3.03  | C_unshiu_01845 | 30829  | 37990  | 7162  | 15.34 | 99.92 |
| scaffold00350 | 85735  | 91191  | 5457  | 2.31  | C_unshiu_01845 | 41249  | 46701  | 5453  | 11.68 | 99.91 |
| scaffold00350 | 95220  | 104453 | 9234  | 3.91  | C_unshiu_01765 | 10316  | 1056   | 9261  | 18.59 | 98.24 |
| scaffold00350 | 114198 | 122447 | 8250  | 3.49  | C_unshiu_01643 | 41405  | 33158  | 8248  | 14.88 | 99.73 |
| scaffold00350 | 122972 | 144559 | 21588 | 9.14  | C_unshiu_01877 | 42319  | 20721  | 21599 | 47.5  | 99.08 |
| scaffold00350 | 156051 | 184794 | 28744 | 12.17 | C_unshiu_01409 | 1      | 28652  | 28652 | 40.88 | 98.67 |
| scaffold00350 | 182255 | 192235 | 9981  | 4.23  | C_unshiu_01950 | 21846  | 11869  | 9978  | 23.36 | 98.85 |
| scaffold00350 | 193763 | 195705 | 1943  | 0.82  | C_unshiu_00823 | 103030 | 104967 | 1938  | 1.54  | 99.74 |
| scaffold00350 | 195706 | 196742 | 1037  | 0.44  | C_unshiu_00823 | 101751 | 102781 | 1031  | 0.82  | 98.08 |
| scaffold00350 | 201676 | 203765 | 2090  | 0.88  | C_unshiu_00823 | 108246 | 110335 | 2090  | 1.66  | 99.9  |
| scaffold00350 | 206899 | 212262 | 5364  | 2.27  | C_unshiu_00823 | 112326 | 117690 | 5365  | 4.25  | 99.98 |
| scaffold00350 | 213257 | 214515 | 1259  | 0.53  | C_unshiu_00823 | 120294 | 121548 | 1255  | 0.99  | 99.68 |
| scaffold00350 | 216314 | 217352 | 1039  | 0.44  | C_unshiu_00823 | 123300 | 124337 | 1038  | 0.82  | 99.81 |
| scaffold00350 | 226270 | 235387 | 9118  | 3.86  | C_unshiu_02804 | 17841  | 8724   | 9118  | 51.11 | 99.98 |
| scaffold00352 | 1      | 1225   | 1225  | 0.52  | C_unshiu_00324 | 37455  | 38680  | 1226  | 0.48  | 99.02 |
| scaffold00352 | 1230   | 3168   | 1939  | 0.82  | C_unshiu_00324 | 38900  | 40838  | 1939  | 0.76  | 99.95 |
| scaffold00352 | 12866  | 14748  | 1883  | 0.8   | C_unshiu_00324 | 40109  | 41992  | 1884  | 0.74  | 98.41 |
| scaffold00352 | 15858  | 16943  | 1086  | 0.46  | C_unshiu_00324 | 43249  | 44332  | 1084  | 0.43  | 98.53 |
| scaffold00352 | 24409  | 29301  | 4893  | 2.07  | C_unshiu_00324 | 51123  | 56029  | 4907  | 1.92  | 98.37 |
| scaffold00352 | 29320  | 31663  | 2344  | 0.99  | C_unshiu_00285 | 193770 | 191411 | 2360  | 0.86  | 98.94 |
| scaffold00352 | 32627  | 37193  | 4567  | 1.94  | C_unshiu_00169 | 331267 | 335833 | 4567  | 1.24  | 100   |
| scaffold00352 | 51384  | 57087  | 5704  | 2.42  | C_unshiu_00285 | 176447 | 170728 | 5720  | 2.09  | 99.27 |
| scaffold00352 | 74814  | 87136  | 12323 | 5.22  | C_unshiu_00285 | 170982 | 158702 | 12281 | 4.48  | 98.74 |

|               |        |        |       |       |                |        |        |       |       |       |
|---------------|--------|--------|-------|-------|----------------|--------|--------|-------|-------|-------|
| scaffold00352 | 88366  | 90906  | 2541  | 1.08  | C_unshiu_00285 | 157190 | 154651 | 2540  | 0.93  | 99.96 |
| scaffold00352 | 95662  | 110260 | 14599 | 6.19  | C_unshiu_00285 | 153498 | 138886 | 14613 | 5.33  | 98.4  |
| scaffold00352 | 114957 | 117019 | 2063  | 0.87  | C_unshiu_00285 | 138888 | 136831 | 2058  | 0.75  | 98.35 |
| scaffold00352 | 137890 | 139623 | 1734  | 0.73  | C_unshiu_01951 | 39294  | 41027  | 1734  | 4.07  | 100   |
| scaffold00352 | 140792 | 150945 | 10154 | 4.3   | C_unshiu_00285 | 100120 | 89955  | 10166 | 3.71  | 99.84 |
| scaffold00352 | 150670 | 161573 | 10904 | 4.62  | C_unshiu_01405 | 25108  | 14203  | 10906 | 15.54 | 99.47 |
| scaffold00352 | 166592 | 167676 | 1085  | 0.46  | C_unshiu_01405 | 9697   | 8610   | 1088  | 1.55  | 98.44 |
| scaffold00352 | 168124 | 171240 | 3117  | 1.32  | C_unshiu_01405 | 8618   | 5493   | 3126  | 4.45  | 98.05 |
| scaffold00352 | 169284 | 175747 | 6464  | 2.74  | C_unshiu_00438 | 47297  | 53771  | 6475  | 3.05  | 98.84 |
| scaffold00352 | 174201 | 182756 | 8556  | 3.63  | C_unshiu_00674 | 1      | 8556   | 8556  | 5.7   | 99.78 |
| scaffold00352 | 182778 | 190441 | 7664  | 3.25  | C_unshiu_00674 | 8837   | 16515  | 7679  | 5.12  | 99.3  |
| scaffold00352 | 189741 | 194468 | 4728  | 2     | C_unshiu_01280 | 28925  | 24198  | 4728  | 6     | 99.96 |
| scaffold00352 | 194489 | 198381 | 3893  | 1.65  | C_unshiu_01280 | 24095  | 20203  | 3893  | 4.94  | 100   |
| scaffold00352 | 200994 | 206676 | 5683  | 2.41  | C_unshiu_02615 | 21769  | 16094  | 5676  | 26.07 | 99.88 |
| scaffold00352 | 208581 | 223043 | 14463 | 6.13  | C_unshiu_02615 | 14457  | 1      | 14457 | 66.41 | 98.88 |
| scaffold00356 | 4040   | 6665   | 2626  | 1.12  | C_unshiu_00890 | 54061  | 56677  | 2617  | 2.21  | 99.28 |
| scaffold00356 | 5179   | 13189  | 8011  | 3.42  | C_unshiu_00890 | 54704  | 46766  | 7939  | 6.71  | 98.84 |
| scaffold00356 | 19872  | 56741  | 36870 | 15.76 | C_unshiu_00890 | 40257  | 3450   | 36808 | 31.11 | 99.67 |
| scaffold00356 | 60335  | 62232  | 1898  | 0.81  | C_unshiu_01214 | 76728  | 74831  | 1898  | 2.26  | 100   |
| scaffold00356 | 62678  | 64164  | 1487  | 0.64  | C_unshiu_02820 | 1      | 1487   | 1487  | 8.5   | 99.93 |
| scaffold00356 | 66149  | 76290  | 10142 | 4.34  | C_unshiu_02820 | 3939   | 13935  | 9997  | 57.17 | 98.33 |
| scaffold00356 | 109145 | 114648 | 5504  | 2.35  | C_unshiu_00332 | 244919 | 239416 | 5504  | 2.19  | 99.93 |
| scaffold00356 | 113965 | 116487 | 2523  | 1.08  | C_unshiu_00332 | 238595 | 236073 | 2523  | 1     | 99.45 |
| scaffold00356 | 116506 | 124691 | 8186  | 3.5   | C_unshiu_00332 | 235854 | 227668 | 8187  | 3.25  | 99.95 |
| scaffold00356 | 129321 | 141723 | 12403 | 5.3   | C_unshiu_00332 | 219486 | 207084 | 12403 | 4.93  | 100   |
| scaffold00356 | 141724 | 144479 | 2756  | 1.18  | C_unshiu_01032 | 27717  | 30472  | 2756  | 2.68  | 100   |
| scaffold00356 | 158012 | 208629 | 50618 | 21.64 | C_unshiu_01003 | 105642 | 55147  | 50496 | 47.8  | 99.39 |
| scaffold00356 | 208659 | 213961 | 5303  | 2.27  | C_unshiu_01003 | 54763  | 49464  | 5300  | 5.02  | 99.74 |
| scaffold00356 | 214111 | 227166 | 13056 | 5.58  | C_unshiu_01003 | 49116  | 36075  | 13042 | 12.35 | 99.51 |
| scaffold00358 | 20136  | 37418  | 17283 | 7.44  | C_unshiu_00695 | 127051 | 144304 | 17254 | 11.96 | 99.16 |
| scaffold00358 | 39404  | 41385  | 1982  | 0.85  | C_unshiu_00114 | 6899   | 4918   | 1982  | 0.46  | 100   |
| scaffold00358 | 41851  | 45595  | 3745  | 1.61  | C_unshiu_02886 | 12314  | 16058  | 3745  | 23.32 | 99.92 |
| scaffold00358 | 45852  | 47227  | 1376  | 0.59  | C_unshiu_00114 | 4991   | 3615   | 1377  | 0.32  | 98.18 |
| scaffold00358 | 47230  | 49076  | 1847  | 0.8   | C_unshiu_02886 | 3391   | 5241   | 1851  | 11.53 | 99.08 |
| scaffold00358 | 68128  | 69183  | 1056  | 0.45  | C_unshiu_02779 | 10680  | 9625   | 1056  | 5.76  | 100   |
| scaffold00358 | 71196  | 72367  | 1172  | 0.5   | C_unshiu_02779 | 7466   | 6295   | 1172  | 6.39  | 100   |
| scaffold00358 | 80050  | 81790  | 1741  | 0.75  | C_unshiu_02730 | 12593  | 10851  | 1743  | 9.03  | 98.28 |
| scaffold00358 | 83427  | 88272  | 4846  | 2.09  | C_unshiu_02032 | 37844  | 33013  | 4832  | 12.23 | 98.19 |
| scaffold00358 | 88269  | 89361  | 1093  | 0.47  | C_unshiu_02730 | 5626   | 4532   | 1095  | 5.67  | 98.54 |
| scaffold00358 | 89696  | 91611  | 1916  | 0.82  | C_unshiu_02032 | 31215  | 29300  | 1916  | 4.85  | 99.63 |
| scaffold00358 | 94273  | 99083  | 4811  | 2.07  | C_unshiu_02032 | 28282  | 23472  | 4811  | 12.18 | 100   |
| scaffold00358 | 99185  | 101105 | 1921  | 0.83  | C_unshiu_02032 | 23336  | 21416  | 1921  | 4.86  | 100   |
| scaffold00358 | 104022 | 108033 | 4012  | 1.73  | C_unshiu_02032 | 19399  | 15380  | 4020  | 10.17 | 98.93 |
| scaffold00358 | 110471 | 112986 | 2516  | 1.08  | C_unshiu_02032 | 13995  | 11495  | 2501  | 6.33  | 98.25 |
| scaffold00358 | 115359 | 120589 | 5231  | 2.25  | C_unshiu_01691 | 52024  | 46793  | 5232  | 9.9   | 99.79 |
| scaffold00358 | 121224 | 142374 | 21151 | 9.11  | C_unshiu_01691 | 46799  | 25648  | 21152 | 40.01 | 99.86 |
| scaffold00358 | 162342 | 171790 | 9449  | 4.07  | C_unshiu_01522 | 8819   | 18263  | 9445  | 15.21 | 99.89 |
| scaffold00358 | 173533 | 212580 | 39048 | 16.81 | C_unshiu_01522 | 18633  | 57700  | 39068 | 62.91 | 99.75 |
| scaffold00359 | 1      | 5778   | 5778  | 2.49  | C_unshiu_00654 | 113544 | 119310 | 5767  | 3.72  | 99.53 |
| scaffold00359 | 9458   | 14095  | 4638  | 2     | C_unshiu_00384 | 114304 | 109655 | 4650  | 2.05  | 98.82 |
| scaffold00359 | 21130  | 22917  | 1788  | 0.77  | C_unshiu_00384 | 102614 | 100826 | 1789  | 0.79  | 99.94 |
| scaffold00359 | 22939  | 28144  | 5206  | 2.24  | C_unshiu_00384 | 134480 | 129272 | 5209  | 2.29  | 99.85 |
| scaffold00359 | 48257  | 66542  | 18286 | 7.88  | C_unshiu_00384 | 73664  | 55334  | 18331 | 8.07  | 98.22 |
| scaffold00359 | 66591  | 68016  | 1426  | 0.61  | C_unshiu_00384 | 55236  | 53811  | 1426  | 0.63  | 99.23 |
| scaffold00359 | 73387  | 74469  | 1083  | 0.47  | C_unshiu_00227 | 197237 | 198319 | 1083  | 0.35  | 100   |
| scaffold00359 | 119959 | 135285 | 15327 | 6.61  | C_unshiu_00798 | 91584  | 76310  | 15275 | 11.89 | 98.13 |
| scaffold00359 | 135312 | 137842 | 2531  | 1.09  | C_unshiu_00798 | 76447  | 73916  | 2532  | 1.97  | 99.96 |
| scaffold00359 | 145003 | 150878 | 5876  | 2.53  | C_unshiu_00798 | 74293  | 68444  | 5850  | 4.55  | 98.2  |
| scaffold00359 | 155250 | 159490 | 4241  | 1.83  | C_unshiu_00798 | 56842  | 52574  | 4269  | 3.32  | 98.38 |
| scaffold00359 | 159517 | 166200 | 6684  | 2.88  | C_unshiu_00798 | 52766  | 46070  | 6697  | 5.21  | 99.58 |
| scaffold00359 | 187647 | 188800 | 1154  | 0.5   | C_unshiu_00798 | 31066  | 29909  | 1158  | 0.9   | 98.36 |
| scaffold00359 | 199609 | 211723 | 12115 | 5.22  | C_unshiu_00083 | 44775  | 56889  | 12115 | 2.56  | 99.85 |
| scaffold00359 | 220434 | 227528 | 7095  | 3.06  | C_unshiu_00227 | 5061   | 12167  | 7107  | 2.3   | 99.03 |
| scaffold00361 | 1      | 4520   | 4520  | 1.96  | C_unshiu_00635 | 47645  | 43167  | 4479  | 2.8   | 98.04 |
| scaffold00361 | 4869   | 6588   | 1720  | 0.75  | C_unshiu_00102 | 375340 | 377059 | 1720  | 0.38  | 100   |
| scaffold00361 | 9185   | 19451  | 10267 | 4.45  | C_unshiu_02890 | 10264  | 1      | 10264 | 64.29 | 99.61 |
| scaffold00361 | 23767  | 37425  | 13659 | 5.92  | C_unshiu_01873 | 31965  | 45623  | 13659 | 29.94 | 99.96 |
| scaffold00361 | 43911  | 45412  | 1502  | 0.65  | C_unshiu_01925 | 36187  | 34686  | 1502  | 3.42  | 99.87 |
| scaffold00361 | 52847  | 59849  | 7003  | 3.03  | C_unshiu_00169 | 90607  | 97609  | 7003  | 1.9   | 100   |
| scaffold00361 | 52851  | 59852  | 7002  | 3.03  | C_unshiu_00050 | 265790 | 272791 | 7002  | 1.16  | 100   |
| scaffold00361 | 68576  | 71150  | 2575  | 1.12  | C_unshiu_00313 | 226498 | 223924 | 2575  | 0.99  | 100   |
| scaffold00361 | 96307  | 103393 | 7087  | 3.07  | C_unshiu_01215 | 19700  | 26768  | 7069  | 8.41  | 98.3  |
| scaffold00361 | 103391 | 109189 | 5799  | 2.51  | C_unshiu_01215 | 29157  | 34993  | 5837  | 6.94  | 98.27 |
| scaffold00361 | 114560 | 128392 | 13833 | 5.99  | C_unshiu_01215 | 41149  | 54955  | 13807 | 16.42 | 99.08 |
| scaffold00361 | 128361 | 133916 | 5556  | 2.41  | C_unshiu_01215 | 55088  | 60643  | 5556  | 6.61  | 99.95 |
| scaffold00361 | 135571 | 138589 | 3019  | 1.31  | C_unshiu_01215 | 61790  | 64806  | 3017  | 3.59  | 99.47 |
| scaffold00361 | 178670 | 194538 | 15869 | 6.88  | C_unshiu_01388 | 13011  | 28877  | 15867 | 22.29 | 99.96 |
| scaffold00361 | 194620 | 197772 | 3153  | 1.37  | C_unshiu_01388 | 29185  | 32334  | 3150  | 4.43  | 99.59 |
| scaffold00361 | 198404 | 211533 | 13130 | 5.69  | C_unshiu_01388 | 33016  | 46142  | 13127 | 18.44 | 99.89 |

|               |        |        |       |       |                |        |        |       |       |       |
|---------------|--------|--------|-------|-------|----------------|--------|--------|-------|-------|-------|
| scaffold00361 | 212546 | 228261 | 15716 | 6.81  | C_unshiu_00689 | 127449 | 143164 | 15716 | 10.73 | 99.97 |
| scaffold00362 | 1      | 22384  | 22384 | 9.77  | C_unshiu_00919 | 71146  | 93531  | 22386 | 19.48 | 99.9  |
| scaffold00362 | 23554  | 41246  | 17693 | 7.72  | C_unshiu_00919 | 95099  | 112794 | 17696 | 15.4  | 99.95 |
| scaffold00362 | 36691  | 64831  | 28141 | 12.28 | C_unshiu_00455 | 15281  | 43413  | 28133 | 13.65 | 99.93 |
| scaffold00362 | 44833  | 121338 | 76506 | 33.38 | C_unshiu_00455 | 23425  | 99922  | 76498 | 37.12 | 99.97 |
| scaffold00362 | 123230 | 152627 | 29398 | 12.83 | C_unshiu_00455 | 101248 | 130649 | 29402 | 14.27 | 99.99 |
| scaffold00362 | 155192 | 156720 | 1529  | 0.67  | C_unshiu_00455 | 131958 | 133486 | 1529  | 0.74  | 100   |
| scaffold00362 | 159136 | 222722 | 63587 | 27.74 | C_unshiu_00455 | 136880 | 200446 | 63567 | 30.85 | 99.93 |
| scaffold00363 | 3401   | 14788  | 11388 | 4.98  | C_unshiu_01272 | 64919  | 76307  | 11389 | 14.34 | 99.92 |
| scaffold00363 | 27612  | 29899  | 2288  | 1     | C_unshiu_01824 | 22836  | 25123  | 2288  | 4.82  | 100   |
| scaffold00363 | 31618  | 33759  | 2142  | 0.94  | C_unshiu_01824 | 25390  | 27530  | 2141  | 4.51  | 99.21 |
| scaffold00363 | 35335  | 38226  | 2892  | 1.26  | C_unshiu_01824 | 29981  | 32872  | 2892  | 6.09  | 100   |
| scaffold00363 | 42613  | 45147  | 2535  | 1.11  | C_unshiu_00492 | 156876 | 154342 | 2535  | 1.3   | 99.88 |
| scaffold00363 | 49973  | 53057  | 3085  | 1.35  | C_unshiu_01824 | 39869  | 42947  | 3079  | 6.48  | 98.29 |
| scaffold00363 | 54200  | 55780  | 1581  | 0.69  | C_unshiu_01824 | 44395  | 45972  | 1578  | 3.32  | 99.68 |
| scaffold00363 | 55781  | 57125  | 1345  | 0.59  | C_unshiu_00095 | 131786 | 133130 | 1345  | 0.29  | 100   |
| scaffold00363 | 57200  | 58205  | 1006  | 0.44  | C_unshiu_00414 | 95356  | 96355  | 1000  | 0.45  | 98.11 |
| scaffold00363 | 59086  | 63235  | 4150  | 1.81  | C_unshiu_02733 | 3552   | 7702   | 4151  | 21.56 | 98.24 |
| scaffold00363 | 63414  | 64732  | 1319  | 0.58  | C_unshiu_02733 | 8764   | 10082  | 1319  | 6.85  | 100   |
| scaffold00363 | 64726  | 66052  | 1327  | 0.58  | C_unshiu_00924 | 20833  | 22159  | 1327  | 1.16  | 100   |
| scaffold00363 | 66587  | 75688  | 9102  | 3.98  | C_unshiu_00414 | 113063 | 122165 | 9103  | 4.13  | 99.69 |
| scaffold00363 | 75690  | 77831  | 2142  | 0.94  | C_unshiu_00414 | 122258 | 124402 | 2145  | 0.97  | 98.88 |
| scaffold00363 | 99193  | 100546 | 1354  | 0.59  | C_unshiu_00395 | 208679 | 207325 | 1355  | 0.61  | 99.12 |
| scaffold00363 | 126252 | 137367 | 11116 | 4.86  | C_unshiu_00395 | 180241 | 169123 | 11119 | 4.97  | 99.74 |
| scaffold00363 | 142181 | 147735 | 5555  | 2.43  | C_unshiu_01151 | 79246  | 73659  | 5588  | 6.16  | 98.3  |
| scaffold00363 | 148175 | 152043 | 3869  | 1.69  | C_unshiu_01151 | 72766  | 68898  | 3869  | 4.26  | 100   |
| scaffold00363 | 152350 | 166095 | 13746 | 6.01  | C_unshiu_00395 | 150336 | 136602 | 13735 | 6.14  | 99.48 |
| scaffold00363 | 170885 | 172057 | 1173  | 0.51  | C_unshiu_00395 | 136690 | 135518 | 1173  | 0.52  | 99.74 |
| scaffold00363 | 173089 | 175819 | 2731  | 1.19  | C_unshiu_01151 | 53290  | 50548  | 2743  | 3.02  | 98.58 |
| scaffold00363 | 176022 | 184636 | 8615  | 3.77  | C_unshiu_01151 | 50556  | 41923  | 8634  | 9.51  | 98.39 |
| scaffold00363 | 192690 | 195257 | 2568  | 1.12  | C_unshiu_00261 | 226008 | 228586 | 2579  | 0.9   | 98.41 |
| scaffold00363 | 195360 | 196810 | 1451  | 0.63  | C_unshiu_00261 | 228867 | 230318 | 1452  | 0.51  | 99.66 |
| scaffold00363 | 215402 | 217655 | 2254  | 0.99  | C_unshiu_00261 | 251675 | 253950 | 2276  | 0.8   | 98.81 |
| scaffold00364 | 8695   | 11408  | 2714  | 1.19  | C_unshiu_01204 | 19876  | 22589  | 2714  | 3.18  | 99.96 |
| scaffold00364 | 12394  | 15767  | 3374  | 1.48  | C_unshiu_01204 | 24148  | 27536  | 3389  | 3.97  | 99.56 |
| scaffold00364 | 17778  | 19104  | 1327  | 0.58  | C_unshiu_01204 | 29885  | 31211  | 1327  | 1.56  | 100   |
| scaffold00364 | 28933  | 36770  | 7838  | 3.43  | C_unshiu_01204 | 39242  | 47083  | 7842  | 9.19  | 99.58 |
| scaffold00364 | 49998  | 61605  | 11608 | 5.08  | C_unshiu_01204 | 11600  | 1      | 11600 | 13.6  | 99.6  |
| scaffold00364 | 75080  | 76356  | 1277  | 0.56  | C_unshiu_00918 | 10007  | 11285  | 1279  | 1.11  | 99.14 |
| scaffold00364 | 77549  | 79626  | 2078  | 0.91  | C_unshiu_00918 | 11987  | 14065  | 2079  | 1.81  | 99.04 |
| scaffold00364 | 112430 | 116856 | 4427  | 1.94  | C_unshiu_00918 | 53988  | 58411  | 4424  | 3.84  | 98.17 |
| scaffold00364 | 117238 | 137192 | 19955 | 8.73  | C_unshiu_00918 | 59294  | 79239  | 19946 | 17.33 | 98.89 |
| scaffold00364 | 163714 | 174176 | 10463 | 4.58  | C_unshiu_00918 | 96513  | 106971 | 10459 | 9.09  | 98.52 |
| scaffold00364 | 174318 | 180054 | 5737  | 2.51  | C_unshiu_00918 | 107787 | 113537 | 5751  | 5     | 98.71 |
| scaffold00364 | 183726 | 193472 | 9747  | 4.26  | C_unshiu_00873 | 4539   | 14253  | 9715  | 8.09  | 99.07 |
| scaffold00364 | 195367 | 198131 | 2765  | 1.21  | C_unshiu_00873 | 16753  | 19517  | 2765  | 2.3   | 99.57 |
| scaffold00364 | 198255 | 199803 | 1549  | 0.68  | C_unshiu_00873 | 20052  | 21596  | 1545  | 1.29  | 99.16 |
| scaffold00364 | 203429 | 204796 | 1368  | 0.6   | C_unshiu_00873 | 23988  | 25344  | 1357  | 1.13  | 98.47 |
| scaffold00364 | 204927 | 213141 | 8215  | 3.59  | C_unshiu_00873 | 25424  | 33615  | 8192  | 6.83  | 99.49 |
| scaffold00364 | 217031 | 221754 | 4724  | 2.07  | C_unshiu_00873 | 36538  | 41262  | 4725  | 3.94  | 99.66 |
| scaffold00364 | 226067 | 228601 | 2535  | 1.11  | C_unshiu_00873 | 47084  | 49618  | 2535  | 2.11  | 100   |
| scaffold00367 | 2707   | 4884   | 2178  | 0.96  | C_unshiu_00870 | 10699  | 8515   | 2185  | 1.81  | 98.04 |
| scaffold00367 | 11084  | 20019  | 8936  | 3.94  | C_unshiu_00709 | 1      | 8879   | 8879  | 6.22  | 98.28 |
| scaffold00367 | 20228  | 26458  | 6231  | 2.75  | C_unshiu_00709 | 9529   | 15784  | 6256  | 4.38  | 98.93 |
| scaffold00367 | 36842  | 40862  | 4021  | 1.77  | C_unshiu_01233 | 66656  | 62609  | 4048  | 4.93  | 98.79 |
| scaffold00367 | 40886  | 42182  | 1297  | 0.57  | C_unshiu_01233 | 61124  | 59828  | 1297  | 1.58  | 100   |
| scaffold00367 | 42926  | 50095  | 7170  | 3.16  | C_unshiu_01233 | 58652  | 51472  | 7181  | 8.75  | 99.25 |
| scaffold00367 | 55007  | 56256  | 1250  | 0.55  | C_unshiu_01233 | 44219  | 42971  | 1249  | 1.52  | 99.92 |
| scaffold00367 | 57085  | 71492  | 14408 | 6.36  | C_unshiu_01233 | 42134  | 27728  | 14407 | 17.55 | 99.93 |
| scaffold00367 | 78218  | 80726  | 2509  | 1.11  | C_unshiu_01233 | 21439  | 18931  | 2509  | 3.06  | 100   |
| scaffold00367 | 80805  | 84131  | 3327  | 1.47  | C_unshiu_01233 | 18619  | 15292  | 3328  | 4.05  | 99.34 |
| scaffold00367 | 104903 | 106249 | 1347  | 0.59  | C_unshiu_00621 | 60777  | 62123  | 1347  | 0.83  | 98.59 |
| scaffold00367 | 106345 | 107831 | 1487  | 0.66  | C_unshiu_01034 | 97320  | 95834  | 1487  | 1.45  | 99.87 |
| scaffold00367 | 108053 | 113153 | 5101  | 2.25  | C_unshiu_01034 | 95190  | 90090  | 5101  | 4.96  | 99.96 |
| scaffold00367 | 121666 | 130198 | 8533  | 3.76  | C_unshiu_02537 | 8525   | 1      | 8525  | 36    | 99.7  |
| scaffold00367 | 132831 | 139147 | 6317  | 2.79  | C_unshiu_01890 | 1      | 6295   | 6295  | 13.98 | 99.53 |
| scaffold00367 | 159524 | 163029 | 3506  | 1.55  | C_unshiu_00953 | 90440  | 93955  | 3516  | 3.16  | 98.95 |
| scaffold00367 | 163101 | 170032 | 6932  | 3.06  | C_unshiu_00953 | 94200  | 101136 | 6937  | 6.23  | 99.21 |
| scaffold00367 | 170202 | 171582 | 1381  | 0.61  | C_unshiu_00953 | 101136 | 102516 | 1381  | 1.24  | 99.78 |
| scaffold00367 | 171600 | 172605 | 1006  | 0.44  | C_unshiu_00953 | 103414 | 104419 | 1006  | 0.9   | 100   |
| scaffold00367 | 172702 | 174573 | 1872  | 0.83  | C_unshiu_00953 | 104565 | 106436 | 1872  | 1.68  | 100   |
| scaffold00367 | 178509 | 179919 | 1411  | 0.62  | C_unshiu_00953 | 109873 | 111277 | 1405  | 1.26  | 99.57 |
| scaffold00367 | 181680 | 185790 | 4111  | 1.81  | C_unshiu_02717 | 19550  | 15440  | 4111  | 21.03 | 99.95 |
| scaffold00367 | 186877 | 194501 | 7625  | 3.36  | C_unshiu_02717 | 14218  | 6621   | 7598  | 38.86 | 99.12 |
| scaffold00367 | 195349 | 197217 | 1869  | 0.82  | C_unshiu_02717 | 5630   | 3762   | 1869  | 9.56  | 99.84 |
| scaffold00367 | 200410 | 202699 | 2290  | 1.01  | C_unshiu_00401 | 215734 | 218014 | 2281  | 1.02  | 98.26 |
| scaffold00367 | 203224 | 211677 | 8454  | 3.73  | C_unshiu_02713 | 5586   | 14038  | 8453  | 42.98 | 99.47 |
| scaffold00367 | 215808 | 217789 | 1982  | 0.87  | C_unshiu_00953 | 1      | 1982   | 1982  | 1.78  | 99.24 |
| scaffold00367 | 218416 | 223716 | 5301  | 2.34  | C_unshiu_00953 | 2996   | 8296   | 5301  | 4.76  | 99.98 |

|               |        |        |       |       |                |        |        |       |       |       |
|---------------|--------|--------|-------|-------|----------------|--------|--------|-------|-------|-------|
| scaffold00367 | 224665 | 226012 | 1348  | 0.59  | C_unshiu_00953 | 8782   | 10129  | 1348  | 1.21  | 99.78 |
| scaffold00368 | 1      | 72858  | 72858 | 32.15 | C_unshiu_00310 | 161931 | 89118  | 72814 | 27.96 | 99.92 |
| scaffold00368 | 80731  | 107766 | 27036 | 11.93 | C_unshiu_00310 | 86975  | 60018  | 26958 | 10.35 | 99.42 |
| scaffold00368 | 110301 | 118193 | 7893  | 3.48  | C_unshiu_00124 | 378981 | 386821 | 7841  | 1.87  | 98.49 |
| scaffold00368 | 117296 | 148357 | 31062 | 13.71 | C_unshiu_00287 | 42705  | 73751  | 31047 | 11.37 | 99.73 |
| scaffold00368 | 148314 | 209519 | 61206 | 27.01 | C_unshiu_00287 | 73866  | 135072 | 61207 | 22.41 | 99.96 |
| scaffold00368 | 210937 | 224488 | 13552 | 5.98  | C_unshiu_00287 | 138633 | 152186 | 13554 | 4.96  | 99.99 |
| scaffold00368 | 224489 | 226619 | 2131  | 0.94  | C_unshiu_00287 | 162868 | 160738 | 2131  | 0.78  | 100   |
| scaffold00371 | 8457   | 17235  | 8779  | 3.94  | C_unshiu_00432 | 153173 | 162014 | 8842  | 4.13  | 98.83 |
| scaffold00371 | 17230  | 20558  | 3329  | 1.49  | C_unshiu_00234 | 65523  | 62195  | 3329  | 1.09  | 100   |
| scaffold00371 | 28205  | 37182  | 8978  | 4.03  | C_unshiu_01068 | 98850  | 89889  | 8962  | 9.07  | 99.77 |
| scaffold00371 | 38283  | 39613  | 1331  | 0.6   | C_unshiu_01068 | 88424  | 87094  | 1331  | 1.35  | 100   |
| scaffold00371 | 43805  | 45117  | 1313  | 0.59  | C_unshiu_01068 | 82133  | 80825  | 1309  | 1.32  | 99.32 |
| scaffold00371 | 53932  | 54972  | 1041  | 0.47  | C_unshiu_01982 | 7068   | 8108   | 1041  | 2.53  | 99.42 |
| scaffold00371 | 59094  | 64142  | 5049  | 2.27  | C_unshiu_01982 | 11750  | 16797  | 5048  | 12.26 | 99.41 |
| scaffold00371 | 66445  | 68135  | 1691  | 0.76  | C_unshiu_01982 | 19513  | 21203  | 1691  | 4.11  | 99.94 |
| scaffold00371 | 75099  | 76795  | 1697  | 0.76  | C_unshiu_01982 | 27723  | 29419  | 1697  | 4.12  | 100   |
| scaffold00371 | 78219  | 87839  | 9621  | 4.32  | C_unshiu_01982 | 31638  | 41184  | 9547  | 23.18 | 98.83 |
| scaffold00371 | 102470 | 104493 | 2024  | 0.91  | C_unshiu_00272 | 103008 | 105031 | 2024  | 0.72  | 99.6  |
| scaffold00371 | 104513 | 106605 | 2093  | 0.94  | C_unshiu_00272 | 106550 | 108642 | 2093  | 0.75  | 99.67 |
| scaffold00371 | 106788 | 108130 | 1343  | 0.6   | C_unshiu_00272 | 108905 | 110248 | 1344  | 0.48  | 99.93 |
| scaffold00371 | 112254 | 115190 | 2937  | 1.32  | C_unshiu_00272 | 113544 | 116442 | 2899  | 1.04  | 98.64 |
| scaffold00371 | 120891 | 127815 | 6925  | 3.11  | C_unshiu_00432 | 102453 | 109420 | 6968  | 3.26  | 98.87 |
| scaffold00371 | 130956 | 132519 | 1564  | 0.7   | C_unshiu_00980 | 75718  | 77281  | 1564  | 1.44  | 100   |
| scaffold00371 | 137923 | 139019 | 1097  | 0.49  | C_unshiu_00432 | 117079 | 118174 | 1096  | 0.51  | 98.63 |
| scaffold00371 | 145650 | 149156 | 3507  | 1.57  | C_unshiu_01068 | 35032  | 31526  | 3507  | 3.55  | 98.35 |
| scaffold00371 | 149456 | 154544 | 5089  | 2.28  | C_unshiu_01630 | 1597   | 6658   | 5062  | 9.04  | 99.31 |
| scaffold00371 | 154537 | 156710 | 2174  | 0.98  | C_unshiu_00086 | 400172 | 402345 | 2174  | 0.46  | 100   |
| scaffold00371 | 165996 | 167811 | 1816  | 0.82  | C_unshiu_01069 | 42053  | 43868  | 1816  | 1.84  | 100   |
| scaffold00371 | 167812 | 169185 | 1374  | 0.62  | C_unshiu_01630 | 20637  | 22010  | 1374  | 2.45  | 99.56 |
| scaffold00371 | 170200 | 173824 | 3625  | 1.63  | C_unshiu_01630 | 23310  | 26937  | 3628  | 6.48  | 98.13 |
| scaffold00371 | 187315 | 190205 | 2891  | 1.3   | C_unshiu_01448 | 1      | 2891   | 2891  | 4.34  | 99.48 |
| scaffold00371 | 196140 | 197349 | 1210  | 0.54  | C_unshiu_02125 | 28461  | 29670  | 1210  | 3.38  | 99.83 |
| scaffold00371 | 197759 | 204389 | 6631  | 2.98  | C_unshiu_01448 | 10256  | 16886  | 6631  | 9.95  | 99.82 |
| scaffold00371 | 205156 | 208541 | 3386  | 1.52  | C_unshiu_00360 | 19082  | 15697  | 3386  | 1.43  | 100   |
| scaffold00371 | 208536 | 209760 | 1225  | 0.55  | C_unshiu_00432 | 126813 | 128037 | 1225  | 0.57  | 100   |
| scaffold00371 | 210994 | 220031 | 9038  | 4.06  | C_unshiu_00432 | 129809 | 138858 | 9050  | 4.23  | 99.6  |
| scaffold00372 | 14885  | 17369  | 2485  | 1.12  | C_unshiu_00611 | 83763  | 86247  | 2485  | 1.51  | 100   |
| scaffold00372 | 19004  | 52419  | 33416 | 15.02 | C_unshiu_00611 | 88295  | 121702 | 33408 | 20.27 | 99.98 |
| scaffold00372 | 32388  | 81286  | 48899 | 21.98 | C_unshiu_00611 | 101679 | 150618 | 48940 | 29.7  | 99.47 |
| scaffold00372 | 82863  | 88622  | 5760  | 2.59  | C_unshiu_00611 | 151368 | 157132 | 5765  | 3.5   | 98.79 |
| scaffold00372 | 88500  | 90411  | 1912  | 0.86  | C_unshiu_00611 | 157108 | 159020 | 1913  | 1.16  | 98.9  |
| scaffold00372 | 89593  | 93570  | 3978  | 1.79  | C_unshiu_01912 | 1      | 3978   | 3978  | 9     | 99.9  |
| scaffold00372 | 94276  | 100194 | 5919  | 2.66  | C_unshiu_00611 | 158878 | 164788 | 5911  | 3.59  | 99.05 |
| scaffold00372 | 96310  | 101173 | 4864  | 2.19  | C_unshiu_01912 | 6223   | 11067  | 4845  | 10.96 | 98.5  |
| scaffold00372 | 104292 | 107647 | 3356  | 1.51  | C_unshiu_00904 | 11576  | 8222   | 3355  | 2.88  | 99.26 |
| scaffold00372 | 107739 | 110476 | 2738  | 1.23  | C_unshiu_00904 | 7976   | 5231   | 2746  | 2.36  | 99.67 |
| scaffold00372 | 116225 | 117876 | 1652  | 0.74  | C_unshiu_00904 | 4469   | 2818   | 1652  | 1.42  | 99.82 |
| scaffold00372 | 118441 | 119920 | 1480  | 0.67  | C_unshiu_02905 | 1971   | 3460   | 1490  | 9.55  | 99.19 |
| scaffold00372 | 120032 | 121084 | 1053  | 0.47  | C_unshiu_02905 | 3749   | 4801   | 1053  | 6.75  | 100   |
| scaffold00372 | 121134 | 124747 | 3614  | 1.62  | C_unshiu_02905 | 4702   | 8315   | 3614  | 23.15 | 100   |
| scaffold00372 | 126470 | 128064 | 1595  | 0.72  | C_unshiu_01912 | 15988  | 17582  | 1595  | 3.61  | 98.62 |
| scaffold00372 | 130052 | 144580 | 14529 | 6.53  | C_unshiu_01576 | 58855  | 44327  | 14529 | 24.69 | 99.88 |
| scaffold00372 | 161583 | 175793 | 14211 | 6.39  | C_unshiu_01400 | 34173  | 48397  | 14225 | 20.2  | 99.63 |
| scaffold00372 | 177678 | 182714 | 5037  | 2.26  | C_unshiu_01400 | 49340  | 54379  | 5040  | 7.16  | 99.17 |
| scaffold00372 | 179862 | 191276 | 11415 | 5.13  | C_unshiu_01649 | 51629  | 40212  | 11418 | 20.69 | 99    |
| scaffold00372 | 194948 | 197706 | 2759  | 1.24  | C_unshiu_01400 | 59402  | 62158  | 2757  | 3.92  | 99.02 |
| scaffold00372 | 197865 | 216822 | 18958 | 8.52  | C_unshiu_01649 | 36536  | 17536  | 19001 | 34.44 | 99.32 |
| scaffold00372 | 216822 | 218429 | 1608  | 0.72  | C_unshiu_00360 | 33909  | 35516  | 1608  | 0.68  | 100   |
| scaffold00372 | 218431 | 219626 | 1196  | 0.54  | C_unshiu_00375 | 189635 | 188439 | 1197  | 0.52  | 99.58 |
| scaffold00373 | 3408   | 13168  | 9761  | 4.39  | C_unshiu_00835 | 9751   | 1      | 9751  | 7.85  | 99.07 |
| scaffold00373 | 9848   | 54707  | 44860 | 20.19 | C_unshiu_00036 | 405553 | 450324 | 44772 | 6.56  | 99.52 |
| scaffold00373 | 55178  | 101884 | 46707 | 21.02 | C_unshiu_00036 | 450582 | 497135 | 46554 | 6.82  | 99    |
| scaffold00373 | 103509 | 115577 | 12069 | 5.43  | C_unshiu_00036 | 499339 | 511417 | 12079 | 1.77  | 99.61 |
| scaffold00373 | 115843 | 128504 | 12662 | 5.7   | C_unshiu_00036 | 511694 | 524362 | 12669 | 1.86  | 99.89 |
| scaffold00373 | 128510 | 185537 | 57028 | 25.66 | C_unshiu_00036 | 524733 | 581825 | 57093 | 8.36  | 99.85 |
| scaffold00373 | 188724 | 197426 | 8703  | 3.92  | C_unshiu_00036 | 586012 | 594721 | 8710  | 1.28  | 99.3  |
| scaffold00373 | 197413 | 201030 | 3618  | 1.63  | C_unshiu_00323 | 176243 | 172627 | 3617  | 1.42  | 99.97 |
| scaffold00373 | 197879 | 201037 | 3159  | 1.42  | C_unshiu_00753 | 121679 | 118521 | 3159  | 2.33  | 100   |
| scaffold00373 | 201042 | 219853 | 18812 | 8.47  | C_unshiu_00036 | 597773 | 616524 | 18752 | 2.75  | 99.58 |
| scaffold00374 | 74     | 7116   | 7043  | 3.18  | C_unshiu_02134 | 35512  | 28460  | 7053  | 19.86 | 98.53 |
| scaffold00374 | 7117   | 13454  | 6338  | 2.87  | C_unshiu_02134 | 28116  | 21779  | 6338  | 17.85 | 99.92 |
| scaffold00374 | 14034  | 20247  | 6214  | 2.81  | C_unshiu_02134 | 20647  | 14434  | 6214  | 17.5  | 99.89 |
| scaffold00374 | 20540  | 23338  | 2799  | 1.27  | C_unshiu_02134 | 14082  | 11282  | 2801  | 7.89  | 99.89 |
| scaffold00374 | 25282  | 27579  | 2298  | 1.04  | C_unshiu_02134 | 8794   | 6497   | 2298  | 6.47  | 99.87 |
| scaffold00374 | 27611  | 33320  | 5710  | 2.58  | C_unshiu_02134 | 6350   | 637    | 5714  | 16.09 | 99.82 |
| scaffold00374 | 34047  | 69007  | 34961 | 15.8  | C_unshiu_00114 | 60424  | 95352  | 34929 | 8.05  | 99.69 |
| scaffold00374 | 73786  | 109495 | 35710 | 16.14 | C_unshiu_00114 | 103734 | 139481 | 35748 | 8.24  | 99.87 |
| scaffold00374 | 109064 | 121299 | 12236 | 5.53  | C_unshiu_00114 | 143855 | 156091 | 12237 | 2.82  | 99.95 |

|               |        |        |        |       |                |        |        |        |       |       |
|---------------|--------|--------|--------|-------|----------------|--------|--------|--------|-------|-------|
| scaffold00374 | 125937 | 152782 | 26846  | 12.14 | C_unshiu_00114 | 161023 | 187884 | 26862  | 6.19  | 99.61 |
| scaffold00374 | 153656 | 173508 | 19853  | 8.97  | C_unshiu_00114 | 192093 | 211949 | 19857  | 4.57  | 99.82 |
| scaffold00374 | 174302 | 181602 | 7301   | 3.3   | C_unshiu_00114 | 213234 | 220534 | 7301   | 1.68  | 99.88 |
| scaffold00374 | 191555 | 201584 | 10030  | 4.53  | C_unshiu_00114 | 230369 | 240409 | 10041  | 2.31  | 99.82 |
| scaffold00374 | 201960 | 209001 | 7042   | 3.18  | C_unshiu_00114 | 240449 | 247492 | 7044   | 1.62  | 99.83 |
| scaffold00378 | 10358  | 146289 | 135932 | 62.93 | C_unshiu_00535 | 9287   | 145208 | 135922 | 74.62 | 99.97 |
| scaffold00378 | 126286 | 183241 | 56956  | 26.37 | C_unshiu_00535 | 125217 | 182161 | 56945  | 31.26 | 99.98 |
| scaffold00378 | 187708 | 212948 | 25241  | 11.69 | C_unshiu_00099 | 366895 | 341623 | 25273  | 5.51  | 99.87 |
| scaffold00378 | 212948 | 214532 | 1585   | 0.73  | C_unshiu_00241 | 82163  | 80579  | 1585   | 0.53  | 100   |
| scaffold00379 | 725    | 7971   | 7247   | 3.36  | C_unshiu_01338 | 40207  | 32971  | 7237   | 9.7   | 99.06 |
| scaffold00379 | 9536   | 33784  | 24249  | 11.24 | C_unshiu_01338 | 32581  | 8334   | 24248  | 32.49 | 99.99 |
| scaffold00379 | 34529  | 41682  | 7154   | 3.32  | C_unshiu_01338 | 7128   | 1      | 7128   | 9.55  | 99.36 |
| scaffold00379 | 38826  | 44612  | 5787   | 2.68  | C_unshiu_02949 | 13647  | 7933   | 5715   | 39.34 | 98.09 |
| scaffold00379 | 44704  | 52151  | 7448   | 3.45  | C_unshiu_02949 | 7448   | 1      | 7448   | 51.26 | 100   |
| scaffold00379 | 61210  | 65472  | 4263   | 1.98  | C_unshiu_01407 | 19804  | 24079  | 4276   | 6.1   | 99.28 |
| scaffold00379 | 67060  | 68728  | 1669   | 0.77  | C_unshiu_01407 | 26205  | 27885  | 1681   | 2.4   | 98.93 |
| scaffold00379 | 68840  | 76858  | 8019   | 3.72  | C_unshiu_01407 | 27979  | 36106  | 8128   | 11.59 | 98.15 |
| scaffold00379 | 76698  | 88897  | 12200  | 5.66  | C_unshiu_01407 | 36015  | 48253  | 12239  | 17.45 | 99.53 |
| scaffold00379 | 89026  | 98728  | 9703   | 4.5   | C_unshiu_01407 | 48266  | 58008  | 9743   | 13.89 | 99.17 |
| scaffold00379 | 98869  | 100698 | 1830   | 0.85  | C_unshiu_00930 | 79545  | 77716  | 1830   | 1.61  | 100   |
| scaffold00379 | 100693 | 108454 | 7762   | 3.6   | C_unshiu_01407 | 60657  | 68400  | 7744   | 11.04 | 99.41 |
| scaffold00379 | 114052 | 116884 | 2833   | 1.31  | C_unshiu_00104 | 30359  | 27528  | 2832   | 0.63  | 99.54 |
| scaffold00379 | 117320 | 119196 | 1877   | 0.87  | C_unshiu_00128 | 318197 | 316321 | 1877   | 0.45  | 100   |
| scaffold00379 | 119188 | 121103 | 1916   | 0.89  | C_unshiu_00104 | 24729  | 22819  | 1911   | 0.42  | 99.63 |
| scaffold00379 | 121783 | 132306 | 10524  | 4.88  | C_unshiu_00104 | 22145  | 11609  | 10537  | 2.34  | 98.8  |
| scaffold00379 | 128808 | 132306 | 3499   | 1.62  | C_unshiu_00128 | 210872 | 214375 | 3504   | 0.85  | 99    |
| scaffold00379 | 132656 | 137388 | 4733   | 2.19  | C_unshiu_00128 | 215429 | 220161 | 4733   | 1.15  | 99.24 |
| scaffold00379 | 139465 | 141645 | 2181   | 1.01  | C_unshiu_00128 | 220157 | 222359 | 2203   | 0.53  | 98    |
| scaffold00379 | 144957 | 146177 | 1221   | 0.57  | C_unshiu_00104 | 1223   | 1      | 1223   | 0.27  | 99.43 |
| scaffold00379 | 150724 | 152639 | 1916   | 0.89  | C_unshiu_00128 | 234331 | 236257 | 1927   | 0.47  | 98.18 |
| scaffold00379 | 152630 | 154166 | 1537   | 0.71  | C_unshiu_00128 | 235822 | 237361 | 1540   | 0.37  | 98.57 |
| scaffold00379 | 154122 | 159865 | 5744   | 2.66  | C_unshiu_00128 | 237362 | 243075 | 5714   | 1.38  | 98.84 |
| scaffold00379 | 165293 | 169937 | 4645   | 2.15  | C_unshiu_00128 | 248749 | 253393 | 4645   | 1.12  | 99.96 |
| scaffold00379 | 171035 | 190727 | 19693  | 9.13  | C_unshiu_00128 | 254760 | 274387 | 19628  | 4.75  | 98.54 |
| scaffold00379 | 193172 | 199412 | 6241   | 2.89  | C_unshiu_00128 | 278352 | 284592 | 6241   | 1.51  | 99.86 |
| scaffold00379 | 199856 | 204980 | 5125   | 2.38  | C_unshiu_00128 | 284812 | 289924 | 5113   | 1.24  | 99.47 |
| scaffold00381 | 3      | 2399   | 2397   | 1.11  | C_unshiu_01933 | 14706  | 17105  | 2400   | 5.53  | 99.88 |
| scaffold00381 | 3503   | 4646   | 1144   | 0.53  | C_unshiu_01933 | 17397  | 18540  | 1144   | 2.64  | 100   |
| scaffold00381 | 4835   | 5869   | 1035   | 0.48  | C_unshiu_01933 | 19461  | 20486  | 1026   | 2.36  | 98.75 |
| scaffold00381 | 7810   | 8883   | 1074   | 0.5   | C_unshiu_01129 | 90552  | 89479  | 1074   | 1.16  | 100   |
| scaffold00381 | 12188  | 42490  | 30303  | 14.06 | C_unshiu_01129 | 88499  | 58275  | 30225  | 32.62 | 99.56 |
| scaffold00381 | 60065  | 61487  | 1423   | 0.66  | C_unshiu_00472 | 163845 | 165258 | 1414   | 0.7   | 99.09 |
| scaffold00381 | 71706  | 109270 | 37565  | 17.43 | C_unshiu_00529 | 158492 | 120968 | 37525  | 20.38 | 99.74 |
| scaffold00381 | 114856 | 176027 | 61172  | 28.39 | C_unshiu_00156 | 377907 | 316823 | 61085  | 16.15 | 99.79 |
| scaffold00381 | 182894 | 205339 | 22446  | 10.42 | C_unshiu_00398 | 1      | 22360  | 22360  | 10.01 | 99.38 |
| scaffold00381 | 207472 | 210096 | 2625   | 1.22  | C_unshiu_00398 | 24127  | 26751  | 2625   | 1.18  | 99.7  |
| scaffold00381 | 210185 | 211978 | 1794   | 0.83  | C_unshiu_00398 | 27067  | 28860  | 1794   | 0.8   | 100   |
| scaffold00385 | 1      | 9696   | 9696   | 4.55  | C_unshiu_00212 | 318290 | 308606 | 9685   | 2.96  | 99.09 |
| scaffold00385 | 11610  | 17365  | 5756   | 2.7   | C_unshiu_00212 | 305539 | 299763 | 5777   | 1.76  | 98.53 |
| scaffold00385 | 17977  | 20983  | 3007   | 1.41  | C_unshiu_00212 | 298989 | 295983 | 3007   | 0.92  | 100   |
| scaffold00385 | 22819  | 25670  | 2852   | 1.34  | C_unshiu_00212 | 295457 | 292608 | 2850   | 0.87  | 99.86 |
| scaffold00385 | 25606  | 35534  | 9929   | 4.66  | C_unshiu_00212 | 292607 | 282645 | 9963   | 3.04  | 99.18 |
| scaffold00385 | 39179  | 59169  | 19991  | 9.38  | C_unshiu_00212 | 277770 | 257785 | 19986  | 6.1   | 98.44 |
| scaffold00385 | 61593  | 71292  | 9700   | 4.55  | C_unshiu_00212 | 255793 | 246090 | 9704   | 2.96  | 99.63 |
| scaffold00385 | 76682  | 85674  | 8993   | 4.22  | C_unshiu_00212 | 241920 | 232906 | 9015   | 2.75  | 98.97 |
| scaffold00385 | 89187  | 104045 | 14859  | 6.97  | C_unshiu_00212 | 229603 | 214759 | 14845  | 4.53  | 98.08 |
| scaffold00385 | 104148 | 111044 | 6897   | 3.24  | C_unshiu_00212 | 214817 | 207945 | 6873   | 2.1   | 98.08 |
| scaffold00385 | 115543 | 117519 | 1977   | 0.93  | C_unshiu_01352 | 33649  | 31673  | 1977   | 2.68  | 100   |
| scaffold00385 | 117514 | 138175 | 20662  | 9.7   | C_unshiu_00212 | 201528 | 180839 | 20690  | 6.32  | 98.59 |
| scaffold00385 | 139396 | 148640 | 9245   | 4.34  | C_unshiu_00212 | 180393 | 171149 | 9245   | 2.82  | 99.92 |
| scaffold00385 | 156015 | 157317 | 1303   | 0.61  | C_unshiu_00823 | 56976  | 55673  | 1304   | 1.03  | 99.08 |
| scaffold00386 | 1      | 9894   | 9894   | 4.66  | C_unshiu_00083 | 456496 | 446595 | 9902   | 2.09  | 99.92 |
| scaffold00386 | 11248  | 48594  | 37347  | 17.6  | C_unshiu_00083 | 444871 | 407523 | 37349  | 7.9   | 99.95 |
| scaffold00386 | 49494  | 117155 | 67662  | 31.89 | C_unshiu_00083 | 407002 | 339355 | 67648  | 14.31 | 99.89 |
| scaffold00386 | 119408 | 138194 | 18787  | 8.85  | C_unshiu_00256 | 78298  | 59545  | 18754  | 6.45  | 99.19 |
| scaffold00386 | 138186 | 166521 | 28336  | 13.35 | C_unshiu_00256 | 58886  | 30565  | 28322  | 9.74  | 98.74 |
| scaffold00386 | 165257 | 167553 | 2297   | 1.08  | C_unshiu_01760 | 49947  | 47636  | 2312   | 4.63  | 98.53 |
| scaffold00386 | 167560 | 169107 | 1548   | 0.73  | C_unshiu_00256 | 29663  | 28115  | 1549   | 0.53  | 99.74 |
| scaffold00386 | 170176 | 172723 | 2548   | 1.2   | C_unshiu_00256 | 26584  | 24036  | 2549   | 0.88  | 99.96 |
| scaffold00386 | 174183 | 182289 | 8107   | 3.82  | C_unshiu_00256 | 23694  | 15589  | 8106   | 2.79  | 99.2  |
| scaffold00386 | 184180 | 193186 | 9007   | 4.24  | C_unshiu_01760 | 33519  | 24498  | 9022   | 18.06 | 98.85 |
| scaffold00386 | 194348 | 197919 | 3572   | 1.68  | C_unshiu_01273 | 8061   | 11596  | 3536   | 4.45  | 98.18 |
| scaffold00387 | 5772   | 7199   | 1428   | 0.68  | C_unshiu_00316 | 253876 | 252448 | 1429   | 0.55  | 99.79 |
| scaffold00387 | 8723   | 10611  | 1889   | 0.9   | C_unshiu_00316 | 252448 | 250552 | 1897   | 0.73  | 99.1  |
| scaffold00387 | 10691  | 17321  | 6631   | 3.16  | C_unshiu_00708 | 81720  | 88367  | 6648   | 4.65  | 99.19 |
| scaffold00387 | 11548  | 23038  | 11491  | 5.47  | C_unshiu_00828 | 1      | 11501  | 11501  | 9.19  | 99.63 |
| scaffold00387 | 27081  | 45323  | 18243  | 8.69  | C_unshiu_00828 | 16189  | 34434  | 18246  | 14.58 | 99.77 |
| scaffold00387 | 46382  | 63390  | 17009  | 8.1   | C_unshiu_00828 | 35830  | 52852  | 17023  | 13.61 | 98.79 |
| scaffold00387 | 63940  | 67258  | 3319   | 1.58  | C_unshiu_00828 | 53055  | 56370  | 3316   | 2.65  | 99.37 |

|               |        |        |       |       |                |        |        |       |       |       |
|---------------|--------|--------|-------|-------|----------------|--------|--------|-------|-------|-------|
| scaffold00387 | 68330  | 70666  | 2337  | 1.11  | C_unshiu_00828 | 56838  | 59169  | 2332  | 1.86  | 99.7  |
| scaffold00387 | 74861  | 78466  | 3606  | 1.72  | C_unshiu_00828 | 62574  | 66179  | 3606  | 2.88  | 100   |
| scaffold00387 | 79626  | 80763  | 1138  | 0.54  | C_unshiu_02069 | 31704  | 32843  | 1140  | 3     | 98.33 |
| scaffold00387 | 99518  | 100566 | 1049  | 0.5   | C_unshiu_02933 | 8626   | 9675   | 1050  | 7.04  | 98.48 |
| scaffold00387 | 114001 | 129219 | 15219 | 7.25  | C_unshiu_02069 | 1      | 15258  | 15258 | 40.12 | 99.53 |
| scaffold00387 | 129238 | 144582 | 15345 | 7.31  | C_unshiu_00316 | 221675 | 206328 | 15348 | 5.94  | 99.69 |
| scaffold00387 | 143696 | 151269 | 7574  | 3.61  | C_unshiu_00316 | 206300 | 198799 | 7502  | 2.91  | 98.94 |
| scaffold00387 | 153068 | 154327 | 1260  | 0.6   | C_unshiu_02933 | 9840   | 11099  | 1260  | 8.45  | 99.52 |
| scaffold00387 | 154349 | 156959 | 2611  | 1.24  | C_unshiu_00316 | 195115 | 192504 | 2612  | 1.01  | 99.89 |
| scaffold00387 | 160777 | 162313 | 1537  | 0.73  | C_unshiu_02556 | 19356  | 17824  | 1533  | 6.63  | 98.9  |
| scaffold00387 | 164142 | 166532 | 2391  | 1.14  | C_unshiu_02556 | 21507  | 19117  | 2391  | 10.35 | 100   |
| scaffold00387 | 167390 | 173659 | 6270  | 2.99  | C_unshiu_02556 | 17865  | 11629  | 6237  | 26.99 | 98.03 |
| scaffold00387 | 175138 | 176726 | 1589  | 0.76  | C_unshiu_02556 | 11459  | 9870   | 1590  | 6.88  | 98.93 |
| scaffold00387 | 176737 | 187069 | 10333 | 4.92  | C_unshiu_01979 | 41269  | 30943  | 10327 | 25.02 | 98.83 |
| scaffold00387 | 190503 | 193624 | 3122  | 1.49  | C_unshiu_01979 | 30857  | 27718  | 3140  | 7.61  | 98.63 |
| scaffold00387 | 194095 | 203425 | 9331  | 4.45  | C_unshiu_01979 | 27666  | 18329  | 9338  | 22.62 | 99.48 |
| scaffold00387 | 204068 | 207033 | 2966  | 1.41  | C_unshiu_01979 | 17158  | 14163  | 2996  | 7.26  | 98.7  |
| scaffold00387 | 207058 | 208528 | 1471  | 0.7   | C_unshiu_01979 | 14056  | 12586  | 1471  | 3.56  | 99.86 |
| scaffold00387 | 208626 | 209887 | 1262  | 0.6   | C_unshiu_01979 | 12462  | 11206  | 1257  | 3.05  | 99.52 |
| scaffold00388 | 1      | 12767  | 12767 | 6.12  | C_unshiu_01520 | 31367  | 44151  | 12785 | 20.56 | 99.06 |
| scaffold00388 | 13946  | 17185  | 3240  | 1.55  | C_unshiu_01520 | 45720  | 48959  | 3240  | 5.21  | 99.97 |
| scaffold00388 | 18154  | 19812  | 1659  | 0.8   | C_unshiu_01520 | 50326  | 51984  | 1659  | 2.67  | 100   |
| scaffold00388 | 61051  | 72837  | 11787 | 5.65  | C_unshiu_01532 | 796    | 12559  | 11764 | 19.11 | 99.45 |
| scaffold00388 | 72838  | 74875  | 2038  | 0.98  | C_unshiu_00634 | 67902  | 69939  | 2038  | 1.27  | 100   |
| scaffold00388 | 74870  | 76196  | 1327  | 0.64  | C_unshiu_01532 | 15365  | 16691  | 1327  | 2.16  | 99.92 |
| scaffold00388 | 77154  | 79864  | 2711  | 1.3   | C_unshiu_01532 | 18121  | 20850  | 2730  | 4.44  | 99.27 |
| scaffold00388 | 84783  | 85887  | 1105  | 0.53  | C_unshiu_01532 | 26418  | 25319  | 1100  | 1.79  | 99.19 |
| scaffold00388 | 94878  | 103411 | 8534  | 4.09  | C_unshiu_01532 | 37331  | 45922  | 8592  | 13.96 | 98.55 |
| scaffold00388 | 104315 | 108375 | 4061  | 1.95  | C_unshiu_01532 | 47304  | 51364  | 4061  | 6.6   | 99.98 |
| scaffold00388 | 110463 | 114081 | 3619  | 1.73  | C_unshiu_01532 | 52070  | 55689  | 3620  | 5.88  | 99.92 |
| scaffold00388 | 116049 | 121191 | 5143  | 2.46  | C_unshiu_01532 | 56291  | 61422  | 5132  | 8.34  | 99.71 |
| scaffold00388 | 125569 | 161531 | 35963 | 17.23 | C_unshiu_01124 | 76898  | 40913  | 35986 | 38.52 | 99.8  |
| scaffold00388 | 160389 | 165568 | 5180  | 2.48  | C_unshiu_00905 | 112677 | 107537 | 5141  | 4.42  | 98.73 |
| scaffold00388 | 165791 | 172668 | 6878  | 3.3   | C_unshiu_00905 | 106788 | 99898  | 6891  | 5.92  | 99.1  |
| scaffold00388 | 166374 | 173721 | 7348  | 3.52  | C_unshiu_02075 | 30669  | 23330  | 7340  | 19.54 | 98.75 |
| scaffold00388 | 185949 | 191119 | 5171  | 2.48  | C_unshiu_00905 | 87724  | 82553  | 5172  | 4.44  | 99.96 |
| scaffold00388 | 197096 | 201309 | 4214  | 2.02  | C_unshiu_00905 | 74487  | 70274  | 4214  | 3.62  | 99.79 |
| scaffold00389 | 2      | 1470   | 1469  | 0.71  | C_unshiu_00856 | 80161  | 78693  | 1469  | 1.2   | 99.73 |
| scaffold00389 | 8534   | 24245  | 15712 | 7.56  | C_unshiu_00856 | 72625  | 56903  | 15723 | 12.87 | 99.45 |
| scaffold00389 | 24353  | 32902  | 8550  | 4.11  | C_unshiu_00856 | 56468  | 47938  | 8531  | 6.98  | 99.3  |
| scaffold00389 | 33998  | 50586  | 16589 | 7.98  | C_unshiu_00856 | 46106  | 29582  | 16525 | 13.52 | 99.22 |
| scaffold00389 | 80408  | 83301  | 2894  | 1.39  | C_unshiu_01955 | 35826  | 38719  | 2894  | 6.81  | 100   |
| scaffold00389 | 86090  | 98113  | 12024 | 5.78  | C_unshiu_01413 | 45076  | 33025  | 12052 | 17.22 | 98.87 |
| scaffold00389 | 98133  | 101837 | 3705  | 1.78  | C_unshiu_01955 | 12403  | 8698   | 3706  | 8.73  | 99.97 |
| scaffold00389 | 112012 | 122950 | 10939 | 5.26  | C_unshiu_01413 | 21096  | 10158  | 10939 | 15.63 | 98.41 |
| scaffold00389 | 122223 | 126445 | 4223  | 2.03  | C_unshiu_02397 | 3645   | 7867   | 4223  | 15.44 | 100   |
| scaffold00389 | 127018 | 130461 | 3444  | 1.66  | C_unshiu_00914 | 8816   | 5362   | 3455  | 2.99  | 98.55 |
| scaffold00389 | 132930 | 135912 | 2983  | 1.43  | C_unshiu_00914 | 2998   | 14     | 2985  | 2.58  | 99.03 |
| scaffold00389 | 136299 | 138900 | 2602  | 1.25  | C_unshiu_02397 | 19394  | 21997  | 2604  | 9.52  | 98.09 |
| scaffold00389 | 147294 | 158422 | 11129 | 5.35  | C_unshiu_02098 | 1      | 11136  | 11136 | 30.49 | 98.75 |
| scaffold00389 | 195561 | 202186 | 6626  | 3.19  | C_unshiu_01953 | 42536  | 35913  | 6624  | 15.57 | 99.94 |
| scaffold00389 | 202624 | 206950 | 4327  | 2.08  | C_unshiu_01953 | 35104  | 30778  | 4327  | 10.17 | 100   |
| scaffold00390 | 1      | 12601  | 12601 | 6.07  | C_unshiu_00373 | 230530 | 218010 | 12521 | 5.4   | 99.02 |
| scaffold00390 | 12606  | 18622  | 6017  | 2.9   | C_unshiu_00373 | 218164 | 212150 | 6015  | 2.59  | 99.97 |
| scaffold00390 | 19144  | 46495  | 27352 | 13.17 | C_unshiu_00373 | 211766 | 184432 | 27335 | 11.78 | 99.89 |
| scaffold00390 | 46297  | 50842  | 4546  | 2.19  | C_unshiu_00373 | 184435 | 179889 | 4547  | 1.96  | 99.43 |
| scaffold00390 | 62032  | 91759  | 29728 | 14.31 | C_unshiu_00992 | 2471   | 32198  | 29728 | 27.73 | 99.99 |
| scaffold00390 | 92002  | 128320 | 36319 | 17.48 | C_unshiu_00992 | 32860  | 69201  | 36342 | 33.9  | 99.93 |
| scaffold00390 | 108360 | 153499 | 45140 | 21.73 | C_unshiu_00992 | 49219  | 94281  | 45063 | 42.04 | 99.7  |
| scaffold00390 | 155697 | 166279 | 10583 | 5.09  | C_unshiu_00992 | 96719  | 107194 | 10476 | 9.77  | 98.22 |
| scaffold00390 | 164652 | 169186 | 4535  | 2.18  | C_unshiu_02080 | 36182  | 31647  | 4536  | 12.16 | 99.98 |
| scaffold00390 | 169261 | 196288 | 27028 | 13.01 | C_unshiu_02080 | 31541  | 4526   | 27016 | 72.42 | 99.83 |
| scaffold00390 | 191122 | 207762 | 16641 | 8.01  | C_unshiu_00061 | 202799 | 186185 | 16615 | 2.87  | 99.39 |
| scaffold00391 | 1      | 20393  | 20393 | 9.83  | C_unshiu_00699 | 132331 | 111979 | 20353 | 14.16 | 99.76 |
| scaffold00391 | 32757  | 35049  | 2293  | 1.11  | C_unshiu_00699 | 101169 | 98878  | 2292  | 1.59  | 98.21 |
| scaffold00391 | 35046  | 53666  | 18621 | 8.98  | C_unshiu_00699 | 98919  | 80329  | 18591 | 12.93 | 98.39 |
| scaffold00391 | 54308  | 63977  | 9670  | 4.66  | C_unshiu_00699 | 39743  | 30088  | 9656  | 6.72  | 98.55 |
| scaffold00391 | 67310  | 71344  | 4035  | 1.95  | C_unshiu_00699 | 67803  | 63798  | 4006  | 2.79  | 98.44 |
| scaffold00391 | 72328  | 78755  | 6428  | 3.1   | C_unshiu_00699 | 62611  | 56183  | 6429  | 4.47  | 98.17 |
| scaffold00391 | 86794  | 89566  | 2773  | 1.34  | C_unshiu_00699 | 57149  | 54374  | 2776  | 1.93  | 98.7  |
| scaffold00391 | 89565  | 93933  | 4369  | 2.11  | C_unshiu_00969 | 22218  | 26594  | 4377  | 3.99  | 98.45 |
| scaffold00391 | 94630  | 109860 | 15231 | 7.34  | C_unshiu_00969 | 26593  | 41851  | 15259 | 13.91 | 99    |
| scaffold00391 | 117885 | 132268 | 14384 | 6.93  | C_unshiu_00969 | 51108  | 65555  | 14448 | 13.17 | 98.36 |
| scaffold00391 | 145804 | 147615 | 1812  | 0.87  | C_unshiu_02311 | 16061  | 17872  | 1812  | 6.13  | 99.45 |
| scaffold00391 | 147633 | 152499 | 4867  | 2.35  | C_unshiu_01262 | 49602  | 54443  | 4842  | 6.06  | 98.46 |
| scaffold00391 | 163311 | 166651 | 3341  | 1.61  | C_unshiu_01262 | 60889  | 64228  | 3340  | 4.18  | 99.4  |
| scaffold00391 | 171417 | 183333 | 11917 | 5.74  | C_unshiu_01262 | 68074  | 79915  | 11842 | 14.81 | 99.04 |
| scaffold00396 | 6354   | 12040  | 5687  | 2.76  | C_unshiu_00245 | 141211 | 146896 | 5686  | 1.9   | 99.96 |
| scaffold00396 | 14672  | 15844  | 1173  | 0.57  | C_unshiu_01884 | 2969   | 4143   | 1175  | 2.6   | 99.57 |

|               |        |        |        |       |                |        |        |        |       |       |
|---------------|--------|--------|--------|-------|----------------|--------|--------|--------|-------|-------|
| scaffold00396 | 15845  | 21234  | 5390   | 2.62  | C_unshiu_00677 | 106148 | 100759 | 5390   | 3.62  | 100   |
| scaffold00396 | 29770  | 33487  | 3718   | 1.81  | C_unshiu_02408 | 27146  | 23429  | 3718   | 13.7  | 99.17 |
| scaffold00396 | 34206  | 44250  | 10045  | 4.88  | C_unshiu_02408 | 22285  | 12254  | 10032  | 36.96 | 99.08 |
| scaffold00396 | 50865  | 55556  | 4692   | 2.28  | C_unshiu_02408 | 6074   | 1364   | 4711   | 17.35 | 98.77 |
| scaffold00396 | 63589  | 66119  | 2531   | 1.23  | C_unshiu_00884 | 1      | 2531   | 2531   | 2.13  | 99.61 |
| scaffold00396 | 69325  | 76459  | 7135   | 3.47  | C_unshiu_00884 | 6078   | 13188  | 7111   | 5.98  | 98.41 |
| scaffold00396 | 77410  | 83031  | 5622   | 2.73  | C_unshiu_00884 | 15105  | 20735  | 5631   | 4.73  | 98.7  |
| scaffold00396 | 93562  | 96066  | 2505   | 1.22  | C_unshiu_01212 | 35419  | 32915  | 2505   | 2.98  | 100   |
| scaffold00396 | 97678  | 101511 | 3834   | 1.86  | C_unshiu_00884 | 35341  | 39147  | 3807   | 3.2   | 98.08 |
| scaffold00396 | 109865 | 116527 | 6663   | 3.24  | C_unshiu_01459 | 63376  | 56739  | 6638   | 10.06 | 99.46 |
| scaffold00396 | 116549 | 122326 | 5778   | 2.81  | C_unshiu_01459 | 56535  | 50764  | 5772   | 8.75  | 98.84 |
| scaffold00396 | 122342 | 124373 | 2032   | 0.99  | C_unshiu_01459 | 50455  | 48416  | 2040   | 3.09  | 99.31 |
| scaffold00396 | 126848 | 129197 | 2350   | 1.14  | C_unshiu_01459 | 47424  | 45075  | 2350   | 3.56  | 99.96 |
| scaffold00396 | 131859 | 135119 | 3261   | 1.58  | C_unshiu_01884 | 12376  | 15645  | 3270   | 7.23  | 99.36 |
| scaffold00396 | 135160 | 140225 | 5066   | 2.46  | C_unshiu_01884 | 16145  | 21209  | 5065   | 11.2  | 99.49 |
| scaffold00396 | 140321 | 144087 | 3767   | 1.83  | C_unshiu_01884 | 21659  | 25427  | 3769   | 8.33  | 99.92 |
| scaffold00396 | 144098 | 145440 | 1343   | 0.65  | C_unshiu_01884 | 25849  | 27191  | 1343   | 2.97  | 99.78 |
| scaffold00396 | 152903 | 163310 | 10408  | 5.06  | C_unshiu_00884 | 60981  | 71391  | 10411  | 8.75  | 99.81 |
| scaffold00396 | 163336 | 166969 | 3634   | 1.77  | C_unshiu_01884 | 39968  | 43601  | 3634   | 8.04  | 99.86 |
| scaffold00396 | 170622 | 177896 | 7275   | 3.53  | C_unshiu_02569 | 1026   | 8298   | 7273   | 31.85 | 99.64 |
| scaffold00396 | 178127 | 180859 | 2733   | 1.33  | C_unshiu_00884 | 45213  | 47945  | 2733   | 2.3   | 99.6  |
| scaffold00396 | 193898 | 195554 | 1657   | 0.8   | C_unshiu_02569 | 12076  | 13732  | 1657   | 7.26  | 100   |
| scaffold00398 | 4676   | 6277   | 1602   | 0.78  | C_unshiu_02738 | 15281  | 13680  | 1602   | 8.33  | 99.75 |
| scaffold00398 | 6269   | 8497   | 2229   | 1.08  | C_unshiu_02738 | 13603  | 11370  | 2234   | 11.62 | 99.37 |
| scaffold00398 | 11835  | 21087  | 9253   | 4.5   | C_unshiu_02738 | 9265   | 1      | 9265   | 48.2  | 99.48 |
| scaffold00398 | 20794  | 30443  | 9650   | 4.69  | C_unshiu_00870 | 30270  | 39966  | 9697   | 8.04  | 98.48 |
| scaffold00398 | 42668  | 49394  | 6727   | 3.27  | C_unshiu_00870 | 51386  | 58145  | 6760   | 5.61  | 98.6  |
| scaffold00398 | 57764  | 72594  | 14831  | 7.21  | C_unshiu_01062 | 26586  | 11757  | 14830  | 14.98 | 99.77 |
| scaffold00398 | 72781  | 83465  | 10685  | 5.2   | C_unshiu_01062 | 10662  | 1      | 10662  | 10.77 | 98.94 |
| scaffold00398 | 81456  | 85024  | 3569   | 1.74  | C_unshiu_02492 | 11849  | 15410  | 3562   | 14.39 | 98.55 |
| scaffold00398 | 92517  | 94273  | 1757   | 0.85  | C_unshiu_02447 | 13680  | 11923  | 1758   | 6.7   | 98.36 |
| scaffold00398 | 116817 | 122549 | 5733   | 2.79  | C_unshiu_00870 | 78316  | 84068  | 5753   | 4.77  | 98.91 |
| scaffold00398 | 134982 | 140919 | 5938   | 2.89  | C_unshiu_00870 | 95470  | 101448 | 5979   | 4.96  | 98.96 |
| scaffold00398 | 141241 | 143416 | 2176   | 1.06  | C_unshiu_00870 | 102278 | 104454 | 2177   | 1.81  | 98.62 |
| scaffold00398 | 145388 | 150825 | 5438   | 2.64  | C_unshiu_00356 | 230102 | 235529 | 5428   | 2.29  | 98.24 |
| scaffold00398 | 152948 | 155675 | 2728   | 1.33  | C_unshiu_02715 | 9647   | 12374  | 2728   | 13.91 | 100   |
| scaffold00398 | 160201 | 161830 | 1630   | 0.79  | C_unshiu_02696 | 19929  | 18295  | 1635   | 8.2   | 98.72 |
| scaffold00398 | 169983 | 173422 | 3440   | 1.67  | C_unshiu_01363 | 11598  | 8157   | 3442   | 4.69  | 99.59 |
| scaffold00398 | 178465 | 179989 | 1525   | 0.74  | C_unshiu_01363 | 3538   | 2014   | 1525   | 2.08  | 99.87 |
| scaffold00398 | 181133 | 182456 | 1324   | 0.64  | C_unshiu_00122 | 140361 | 139039 | 1323   | 0.31  | 98.57 |
| scaffold00398 | 184936 | 193493 | 8558   | 4.16  | C_unshiu_02696 | 13756  | 5191   | 8566   | 42.98 | 99.46 |
| scaffold00399 | 4398   | 5766   | 1369   | 0.67  | C_unshiu_00230 | 109866 | 111234 | 1369   | 0.44  | 99.05 |
| scaffold00399 | 6900   | 132356 | 125457 | 61.03 | C_unshiu_00230 | 112719 | 238183 | 125465 | 40.55 | 99.95 |
| scaffold00399 | 134145 | 152601 | 18457  | 8.98  | C_unshiu_00230 | 240462 | 258925 | 18464  | 5.97  | 99.96 |
| scaffold00399 | 156310 | 200691 | 44382  | 21.59 | C_unshiu_00230 | 264360 | 308745 | 44386  | 14.35 | 99.93 |
| scaffold00399 | 200706 | 205556 | 4851   | 2.36  | C_unshiu_00231 | 1309   | 6163   | 4855   | 1.58  | 99.81 |
| scaffold00402 | 1      | 1239   | 1239   | 0.61  | C_unshiu_00284 | 45602  | 44365  | 1238   | 0.45  | 98.31 |
| scaffold00402 | 2349   | 4735   | 2387   | 1.17  | C_unshiu_01595 | 6573   | 8959   | 2387   | 4.14  | 100   |
| scaffold00402 | 5003   | 7330   | 2328   | 1.14  | C_unshiu_01595 | 9599   | 11926  | 2328   | 4.04  | 100   |
| scaffold00402 | 7730   | 9873   | 2144   | 1.05  | C_unshiu_00128 | 109066 | 111209 | 2144   | 0.52  | 100   |
| scaffold00402 | 10588  | 12605  | 2018   | 0.99  | C_unshiu_00128 | 112350 | 114367 | 2018   | 0.49  | 100   |
| scaffold00402 | 12615  | 18953  | 6339   | 3.11  | C_unshiu_00128 | 115633 | 121985 | 6353   | 1.54  | 99.26 |
| scaffold00402 | 24988  | 29407  | 4420   | 2.17  | C_unshiu_01589 | 38090  | 33666  | 4425   | 7.6   | 98.87 |
| scaffold00402 | 52579  | 59402  | 6824   | 3.34  | C_unshiu_02037 | 36805  | 29995  | 6811   | 17.37 | 99.4  |
| scaffold00402 | 59604  | 78639  | 19036  | 9.32  | C_unshiu_02037 | 29347  | 10306  | 19042  | 48.55 | 99.75 |
| scaffold00402 | 77360  | 83722  | 6363   | 3.12  | C_unshiu_01589 | 9275   | 2895   | 6381   | 10.95 | 98.48 |
| scaffold00402 | 83138  | 87863  | 4726   | 2.32  | C_unshiu_00768 | 1      | 4725   | 4725   | 3.54  | 99.98 |
| scaffold00402 | 89563  | 98085  | 8523   | 4.18  | C_unshiu_00768 | 6488   | 15010  | 8523   | 6.39  | 100   |
| scaffold00402 | 98101  | 99610  | 1510   | 0.74  | C_unshiu_00768 | 15752  | 17261  | 1510   | 1.13  | 100   |
| scaffold00402 | 101006 | 104907 | 3902   | 1.91  | C_unshiu_00768 | 19093  | 23053  | 3961   | 2.97  | 98.13 |
| scaffold00402 | 126427 | 155870 | 29444  | 14.42 | C_unshiu_00768 | 41281  | 70679  | 29399  | 22.04 | 98.83 |
| scaffold00402 | 156376 | 175901 | 19526  | 9.56  | C_unshiu_00768 | 71786  | 91207  | 19422  | 14.56 | 98.48 |
| scaffold00402 | 175948 | 192068 | 16121  | 7.9   | C_unshiu_00768 | 91641  | 107723 | 16083  | 12.06 | 98.6  |
| scaffold00403 | 8824   | 11818  | 2995   | 1.47  | C_unshiu_00240 | 298614 | 301601 | 2988   | 0.99  | 99.37 |
| scaffold00403 | 8924   | 15716  | 6793   | 3.34  | C_unshiu_00240 | 298612 | 291834 | 6779   | 2.25  | 99.69 |
| scaffold00403 | 18935  | 25255  | 6321   | 3.11  | C_unshiu_00240 | 290377 | 284152 | 6226   | 2.06  | 98.03 |
| scaffold00403 | 25315  | 29598  | 4284   | 2.11  | C_unshiu_00240 | 280636 | 276341 | 4296   | 1.42  | 99.3  |
| scaffold00403 | 36742  | 41584  | 4843   | 2.38  | C_unshiu_00240 | 285546 | 280704 | 4843   | 1.61  | 100   |
| scaffold00403 | 43708  | 79358  | 35651  | 17.55 | C_unshiu_00240 | 269561 | 233944 | 35618  | 11.81 | 99.88 |
| scaffold00403 | 79274  | 82993  | 3720   | 1.83  | C_unshiu_00240 | 233971 | 230252 | 3720   | 1.23  | 99.92 |
| scaffold00403 | 90291  | 91748  | 1458   | 0.72  | C_unshiu_00093 | 64524  | 63066  | 1459   | 0.31  | 99.73 |
| scaffold00403 | 92981  | 131717 | 38737  | 19.06 | C_unshiu_00093 | 62857  | 24115  | 38743  | 8.31  | 99.94 |
| scaffold00403 | 131717 | 155727 | 24011  | 11.82 | C_unshiu_00093 | 24013  | 3      | 24011  | 5.15  | 99.99 |
| scaffold00403 | 177807 | 186891 | 9085   | 4.47  | C_unshiu_00444 | 1      | 9085   | 9085   | 4.34  | 99.91 |
| scaffold00403 | 193115 | 200529 | 7415   | 3.65  | C_unshiu_00444 | 14892  | 22307  | 7416   | 3.55  | 99.99 |
| scaffold00405 | 7970   | 10109  | 2140   | 1.06  | C_unshiu_00222 | 177711 | 179852 | 2142   | 0.68  | 99.21 |
| scaffold00405 | 14318  | 44888  | 30571  | 15.13 | C_unshiu_00222 | 181776 | 212365 | 30590  | 9.74  | 99.47 |
| scaffold00405 | 44876  | 70814  | 25939  | 12.84 | C_unshiu_00222 | 212282 | 238261 | 25980  | 8.27  | 99.11 |
| scaffold00405 | 70865  | 78922  | 8058   | 3.99  | C_unshiu_00222 | 238254 | 246339 | 8086   | 2.57  | 99.1  |

|               |        |        |       |       |                |        |        |       |       |       |
|---------------|--------|--------|-------|-------|----------------|--------|--------|-------|-------|-------|
| scaffold00405 | 79049  | 84372  | 5324  | 2.64  | C_unshiu_00222 | 246508 | 251837 | 5330  | 1.7   | 99.7  |
| scaffold00405 | 84434  | 114884 | 30451 | 15.07 | C_unshiu_00222 | 252151 | 282608 | 30458 | 9.7   | 98.8  |
| scaffold00405 | 116275 | 117451 | 1177  | 0.58  | C_unshiu_00222 | 284506 | 285682 | 1177  | 0.37  | 100   |
| scaffold00405 | 117451 | 121773 | 4323  | 2.14  | C_unshiu_00675 | 25954  | 30285  | 4332  | 2.89  | 98.98 |
| scaffold00405 | 122417 | 145385 | 22969 | 11.37 | C_unshiu_00675 | 30277  | 53263  | 22987 | 15.33 | 99.42 |
| scaffold00405 | 152666 | 177723 | 25058 | 12.4  | C_unshiu_00675 | 51296  | 76377  | 25082 | 16.73 | 99.67 |
| scaffold00405 | 177730 | 180149 | 2420  | 1.2   | C_unshiu_00675 | 76740  | 79162  | 2423  | 1.62  | 99.55 |
| scaffold00405 | 180545 | 195397 | 14853 | 7.35  | C_unshiu_00675 | 79851  | 94634  | 14784 | 9.86  | 99.29 |
| scaffold00405 | 195958 | 197061 | 1104  | 0.55  | C_unshiu_00675 | 95256  | 96359  | 1104  | 0.74  | 99.73 |
| scaffold00405 | 200517 | 202048 | 1532  | 0.76  | C_unshiu_00835 | 14082  | 15613  | 1532  | 1.23  | 99.67 |
| scaffold00406 | 1      | 1613   | 1613  | 0.8   | C_unshiu_01989 | 10803  | 9185   | 1619  | 3.96  | 98.4  |
| scaffold00406 | 3519   | 6005   | 2487  | 1.24  | C_unshiu_01989 | 6591   | 4106   | 2486  | 6.07  | 99.52 |
| scaffold00406 | 6085   | 9710   | 3626  | 1.8   | C_unshiu_01989 | 3644   | 1      | 3644  | 8.9   | 98    |
| scaffold00406 | 18753  | 22346  | 3594  | 1.79  | C_unshiu_02074 | 11296  | 14866  | 3571  | 9.48  | 98.47 |
| scaffold00406 | 23360  | 24431  | 1072  | 0.53  | C_unshiu_02074 | 14900  | 15972  | 1073  | 2.85  | 98.6  |
| scaffold00406 | 25487  | 30353  | 4867  | 2.42  | C_unshiu_00070 | 356531 | 351670 | 4862  | 0.93  | 98.34 |
| scaffold00406 | 25487  | 30353  | 4867  | 2.42  | C_unshiu_00185 | 335225 | 340095 | 4871  | 1.41  | 98.18 |
| scaffold00406 | 33424  | 36322  | 2899  | 1.44  | C_unshiu_02513 | 9158   | 12056  | 2899  | 11.98 | 98.59 |
| scaffold00406 | 54306  | 57129  | 2824  | 1.4   | C_unshiu_01625 | 5767   | 8589   | 2823  | 5.02  | 99.08 |
| scaffold00406 | 68740  | 81783  | 13044 | 6.48  | C_unshiu_01625 | 17882  | 30975  | 13094 | 23.28 | 99.05 |
| scaffold00406 | 87524  | 92416  | 4893  | 2.43  | C_unshiu_01625 | 40954  | 45871  | 4918  | 8.74  | 98.44 |
| scaffold00406 | 92635  | 94677  | 2043  | 1.02  | C_unshiu_01625 | 46121  | 48164  | 2044  | 3.63  | 99.71 |
| scaffold00406 | 99545  | 102092 | 2548  | 1.27  | C_unshiu_02394 | 26470  | 23923  | 2548  | 9.29  | 100   |
| scaffold00406 | 107975 | 114907 | 6933  | 3.45  | C_unshiu_02394 | 12002  | 5058   | 6945  | 25.33 | 99.1  |
| scaffold00406 | 114892 | 119177 | 4286  | 2.13  | C_unshiu_02394 | 4241   | 1      | 4241  | 15.47 | 98.11 |
| scaffold00406 | 138463 | 159317 | 20855 | 10.37 | C_unshiu_00435 | 173261 | 152405 | 20857 | 9.76  | 99.79 |
| scaffold00406 | 171600 | 187880 | 16281 | 8.09  | C_unshiu_00435 | 105630 | 121944 | 16315 | 7.63  | 98.21 |
| scaffold00406 | 188456 | 193209 | 4754  | 2.36  | C_unshiu_00435 | 121575 | 126328 | 4754  | 2.22  | 100   |
| scaffold00406 | 193871 | 198333 | 4463  | 2.22  | C_unshiu_01524 | 51663  | 56124  | 4462  | 7.2   | 99.64 |
| scaffold00406 | 199984 | 201177 | 1194  | 0.59  | C_unshiu_01524 | 58329  | 59522  | 1194  | 1.93  | 99.83 |
| scaffold00408 | 7988   | 14552  | 6565  | 3.28  | C_unshiu_02221 | 16901  | 23478  | 6578  | 20.2  | 98.89 |
| scaffold00408 | 18400  | 24833  | 6434  | 3.21  | C_unshiu_02205 | 5220   | 11666  | 6447  | 19.51 | 99.16 |
| scaffold00408 | 25195  | 26561  | 1367  | 0.68  | C_unshiu_02205 | 11731  | 13097  | 1367  | 4.14  | 99.85 |
| scaffold00408 | 37902  | 46064  | 8163  | 4.08  | C_unshiu_02205 | 24876  | 33038  | 8163  | 24.71 | 100   |
| scaffold00408 | 57830  | 65717  | 7888  | 3.94  | C_unshiu_01871 | 38882  | 30997  | 7886  | 17.24 | 98.97 |
| scaffold00408 | 72613  | 86942  | 14330 | 7.16  | C_unshiu_01871 | 24169  | 9851   | 14319 | 31.3  | 99.62 |
| scaffold00408 | 86943  | 96590  | 9648  | 4.82  | C_unshiu_01871 | 9763   | 124    | 9640  | 21.07 | 99.2  |
| scaffold00408 | 97973  | 99016  | 1044  | 0.52  | C_unshiu_00534 | 156103 | 155060 | 1044  | 0.57  | 99.52 |
| scaffold00408 | 98042  | 105904 | 7863  | 3.93  | C_unshiu_01328 | 18661  | 10797  | 7865  | 10.45 | 99.03 |
| scaffold00408 | 111290 | 117231 | 5942  | 2.97  | C_unshiu_01328 | 5958   | 1      | 5958  | 7.92  | 99.56 |
| scaffold00408 | 112720 | 122628 | 9909  | 4.95  | C_unshiu_02296 | 6647   | 16429  | 9783  | 32.62 | 98.24 |
| scaffold00408 | 124102 | 131100 | 6999  | 3.5   | C_unshiu_02296 | 19027  | 26047  | 7021  | 23.41 | 99.52 |
| scaffold00408 | 126937 | 136857 | 9921  | 4.95  | C_unshiu_02644 | 4864   | 14784  | 9921  | 47.09 | 98.35 |
| scaffold00408 | 193575 | 196405 | 2831  | 1.41  | C_unshiu_01996 | 30136  | 27305  | 2832  | 6.96  | 98.34 |
| scaffold00409 | 1313   | 3272   | 1960  | 0.98  | C_unshiu_00420 | 185966 | 184007 | 1960  | 0.9   | 100   |
| scaffold00409 | 17990  | 22511  | 4522  | 2.26  | C_unshiu_03043 | 1761   | 6305   | 4545  | 39.05 | 99.47 |
| scaffold00409 | 23773  | 53785  | 30013 | 15.01 | C_unshiu_02023 | 9632   | 39703  | 30072 | 75.73 | 98.37 |
| scaffold00409 | 54238  | 82679  | 28442 | 14.22 | C_unshiu_02264 | 31028  | 2662   | 28367 | 91.42 | 99.56 |
| scaffold00409 | 113614 | 120887 | 7274  | 3.64  | C_unshiu_01701 | 30470  | 23187  | 7284  | 13.88 | 98.41 |
| scaffold00409 | 126063 | 129443 | 3381  | 1.69  | C_unshiu_01701 | 18836  | 15456  | 3381  | 6.44  | 99.44 |
| scaffold00409 | 129605 | 132719 | 3115  | 1.56  | C_unshiu_01701 | 15456  | 12353  | 3104  | 5.92  | 99.1  |
| scaffold00409 | 133053 | 138466 | 5414  | 2.71  | C_unshiu_01576 | 8083   | 13493  | 5411  | 9.19  | 99.5  |
| scaffold00409 | 144203 | 146382 | 2180  | 1.09  | C_unshiu_01576 | 18466  | 20660  | 2195  | 3.73  | 98    |
| scaffold00409 | 147614 | 160675 | 13062 | 6.53  | C_unshiu_01576 | 21960  | 35109  | 13150 | 22.34 | 98.05 |
| scaffold00409 | 178689 | 182970 | 4282  | 2.14  | C_unshiu_01913 | 25425  | 21144  | 4282  | 9.69  | 100   |
| scaffold00409 | 183116 | 187740 | 4625  | 2.31  | C_unshiu_02794 | 1      | 4581   | 4581  | 25.45 | 98.51 |
| scaffold00409 | 191204 | 194421 | 3218  | 1.61  | C_unshiu_02794 | 7256   | 10455  | 3200  | 17.78 | 98.48 |
| scaffold00409 | 194443 | 195466 | 1024  | 0.51  | C_unshiu_02794 | 11754  | 12777  | 1024  | 5.69  | 100   |
| scaffold00409 | 195449 | 196981 | 1533  | 0.77  | C_unshiu_02794 | 12859  | 14390  | 1532  | 8.51  | 99.74 |
| scaffold00410 | 5815   | 6880   | 1066  | 0.54  | C_unshiu_01276 | 44897  | 45960  | 1064  | 1.34  | 98.31 |
| scaffold00410 | 11029  | 29327  | 18299 | 9.2   | C_unshiu_01276 | 45959  | 64325  | 18367 | 23.22 | 99.11 |
| scaffold00410 | 40701  | 49383  | 8683  | 4.36  | C_unshiu_00733 | 28122  | 36752  | 8631  | 6.23  | 99.01 |
| scaffold00410 | 73614  | 76612  | 2999  | 1.51  | C_unshiu_01466 | 33778  | 30798  | 2981  | 4.55  | 99.07 |
| scaffold00410 | 77579  | 83234  | 5656  | 2.84  | C_unshiu_01466 | 29379  | 23728  | 5652  | 8.62  | 99.68 |
| scaffold00410 | 83229  | 87457  | 4229  | 2.13  | C_unshiu_01426 | 51805  | 56033  | 4229  | 6.17  | 100   |
| scaffold00410 | 87458  | 92396  | 4939  | 2.48  | C_unshiu_01466 | 19822  | 14883  | 4940  | 7.53  | 99.68 |
| scaffold00410 | 92502  | 102646 | 10145 | 5.1   | C_unshiu_01466 | 14610  | 4426   | 10185 | 15.53 | 99.11 |
| scaffold00410 | 102640 | 103763 | 1124  | 0.56  | C_unshiu_00332 | 27338  | 26215  | 1124  | 0.45  | 100   |
| scaffold00410 | 104730 | 112280 | 7551  | 3.8   | C_unshiu_02269 | 7085   | 14626  | 7542  | 24.44 | 99.76 |
| scaffold00410 | 112328 | 115398 | 3071  | 1.54  | C_unshiu_02269 | 14544  | 17615  | 3072  | 9.96  | 99.97 |
| scaffold00410 | 126251 | 132006 | 5756  | 2.89  | C_unshiu_02180 | 28285  | 33995  | 5711  | 16.8  | 99.03 |
| scaffold00410 | 131326 | 133987 | 2662  | 1.34  | C_unshiu_01466 | 41271  | 38612  | 2660  | 4.06  | 98.8  |
| scaffold00410 | 134076 | 136509 | 2434  | 1.22  | C_unshiu_02180 | 20552  | 18120  | 2433  | 7.16  | 99.79 |
| scaffold00410 | 136518 | 138057 | 1540  | 0.77  | C_unshiu_02317 | 23842  | 22303  | 1540  | 5.25  | 100   |
| scaffold00410 | 142393 | 144060 | 1668  | 0.84  | C_unshiu_02180 | 12787  | 11116  | 1672  | 4.92  | 99.7  |
| scaffold00410 | 146282 | 154874 | 8593  | 4.32  | C_unshiu_02180 | 10115  | 1523   | 8593  | 25.28 | 99.99 |
| scaffold00410 | 156364 | 161512 | 5149  | 2.59  | C_unshiu_01536 | 47311  | 42164  | 5148  | 8.4   | 99.46 |
| scaffold00410 | 162968 | 165705 | 2738  | 1.38  | C_unshiu_01536 | 40212  | 37476  | 2737  | 4.47  | 99.82 |
| scaffold00410 | 168089 | 195797 | 27709 | 13.93 | C_unshiu_01536 | 27617  | 1      | 27617 | 45.06 | 99.45 |

|               |        |        |       |       |                |        |        |       |       |       |
|---------------|--------|--------|-------|-------|----------------|--------|--------|-------|-------|-------|
| scaffold00410 | 193995 | 195935 | 1941  | 0.98  | C_unshiu_00709 | 35400  | 33456  | 1945  | 1.36  | 98.25 |
| scaffold00411 | 2427   | 4152   | 1726  | 0.87  | C_unshiu_00863 | 99239  | 97517  | 1723  | 1.42  | 99.71 |
| scaffold00411 | 4316   | 30562  | 26247 | 13.23 | C_unshiu_00863 | 97403  | 71182  | 26222 | 21.61 | 99.87 |
| scaffold00411 | 46403  | 60530  | 14128 | 7.12  | C_unshiu_00863 | 56668  | 42564  | 14105 | 11.63 | 99.55 |
| scaffold00411 | 65552  | 78568  | 13017 | 6.56  | C_unshiu_00863 | 38114  | 25098  | 13017 | 10.73 | 99.98 |
| scaffold00411 | 79453  | 96072  | 16620 | 8.38  | C_unshiu_00863 | 23545  | 6939   | 16607 | 13.69 | 98.42 |
| scaffold00411 | 96162  | 97472  | 1311  | 0.66  | C_unshiu_00863 | 6829   | 5519   | 1311  | 1.08  | 100   |
| scaffold00411 | 98490  | 99584  | 1095  | 0.55  | C_unshiu_01163 | 27116  | 28210  | 1095  | 1.22  | 100   |
| scaffold00411 | 101471 | 103173 | 1703  | 0.86  | C_unshiu_01163 | 84273  | 85979  | 1707  | 1.9   | 98.48 |
| scaffold00411 | 105991 | 112151 | 6161  | 3.11  | C_unshiu_00081 | 478132 | 471967 | 6166  | 1.29  | 99.66 |
| scaffold00411 | 113511 | 115388 | 1878  | 0.95  | C_unshiu_00081 | 470476 | 468597 | 1880  | 0.39  | 99.68 |
| scaffold00411 | 117146 | 127983 | 10838 | 5.46  | C_unshiu_02626 | 14075  | 3221   | 10855 | 50.4  | 99.19 |
| scaffold00411 | 123600 | 127983 | 4384  | 2.21  | C_unshiu_01163 | 6      | 4397   | 4392  | 4.9   | 99.09 |
| scaffold00411 | 128007 | 140258 | 12252 | 6.18  | C_unshiu_01163 | 4348   | 16581  | 12234 | 13.65 | 99.14 |
| scaffold00411 | 140950 | 150518 | 9569  | 4.82  | C_unshiu_01163 | 17241  | 26822  | 9582  | 10.69 | 99.04 |
| scaffold00411 | 151790 | 153919 | 2130  | 1.07  | C_unshiu_00863 | 4085   | 1956   | 2130  | 1.76  | 99.67 |
| scaffold00411 | 152145 | 169757 | 17613 | 8.88  | C_unshiu_01163 | 27628  | 45246  | 17619 | 19.66 | 98.82 |
| scaffold00411 | 174059 | 176018 | 1960  | 0.99  | C_unshiu_01163 | 49192  | 51151  | 1960  | 2.19  | 99.69 |
| scaffold00411 | 176035 | 188074 | 12040 | 6.07  | C_unshiu_01163 | 51281  | 63323  | 12043 | 13.44 | 99.73 |
| scaffold00411 | 187516 | 196962 | 9447  | 4.76  | C_unshiu_01163 | 62832  | 72278  | 9447  | 10.54 | 99.45 |
| scaffold00414 | 1      | 1289   | 1289  | 0.66  | C_unshiu_00200 | 285702 | 286990 | 1289  | 0.38  | 100   |
| scaffold00414 | 6459   | 8720   | 2262  | 1.15  | C_unshiu_00200 | 292862 | 295127 | 2266  | 0.67  | 98.51 |
| scaffold00414 | 10193  | 11863  | 1671  | 0.85  | C_unshiu_00200 | 297300 | 298970 | 1671  | 0.5   | 99.58 |
| scaffold00414 | 12336  | 31254  | 18919 | 9.63  | C_unshiu_00200 | 297819 | 316714 | 18896 | 5.62  | 98.46 |
| scaffold00414 | 28636  | 34729  | 6094  | 3.1   | C_unshiu_01452 | 53367  | 47228  | 6140  | 9.24  | 98.88 |
| scaffold00414 | 35428  | 36781  | 1354  | 0.69  | C_unshiu_00200 | 321659 | 323012 | 1354  | 0.4   | 99.93 |
| scaffold00414 | 36777  | 38353  | 1577  | 0.8   | C_unshiu_00272 | 116438 | 118014 | 1577  | 0.56  | 100   |
| scaffold00414 | 38357  | 41011  | 2655  | 1.35  | C_unshiu_00200 | 324990 | 327644 | 2655  | 0.79  | 100   |
| scaffold00414 | 41425  | 43621  | 2197  | 1.12  | C_unshiu_00200 | 328344 | 330531 | 2188  | 0.65  | 98.41 |
| scaffold00414 | 45946  | 47822  | 1877  | 0.96  | C_unshiu_00200 | 331044 | 332904 | 1861  | 0.55  | 98.99 |
| scaffold00414 | 50486  | 79810  | 29325 | 14.93 | C_unshiu_00476 | 456    | 29801  | 29346 | 14.68 | 99.15 |
| scaffold00414 | 81012  | 83673  | 2662  | 1.35  | C_unshiu_00476 | 31410  | 34064  | 2655  | 1.33  | 98.27 |
| scaffold00414 | 99531  | 110837 | 11307 | 5.76  | C_unshiu_00476 | 39264  | 50665  | 11402 | 5.71  | 98.24 |
| scaffold00414 | 133937 | 139460 | 5524  | 2.81  | C_unshiu_00476 | 73328  | 78836  | 5509  | 2.76  | 99.1  |
| scaffold00414 | 139486 | 143957 | 4472  | 2.28  | C_unshiu_00144 | 366026 | 370502 | 4477  | 1.13  | 99.64 |
| scaffold00414 | 157736 | 165218 | 7483  | 3.81  | C_unshiu_00476 | 95521  | 103009 | 7489  | 3.75  | 99.71 |
| scaffold00414 | 165219 | 171310 | 6092  | 3.1   | C_unshiu_00040 | 496922 | 503013 | 6092  | 0.92  | 100   |
| scaffold00414 | 171305 | 173317 | 2013  | 1.02  | C_unshiu_00476 | 108841 | 110853 | 2013  | 1.01  | 99.85 |
| scaffold00414 | 179996 | 181164 | 1169  | 0.6   | C_unshiu_00019 | 451346 | 450169 | 1178  | 0.14  | 98.13 |
| scaffold00414 | 181290 | 188584 | 7295  | 3.71  | C_unshiu_00476 | 118233 | 125527 | 7295  | 3.65  | 100   |
| scaffold00414 | 191966 | 194883 | 2918  | 1.49  | C_unshiu_00476 | 129543 | 132471 | 2929  | 1.47  | 99.45 |
| scaffold00416 | 6172   | 18334  | 12163 | 6.26  | C_unshiu_01201 | 45589  | 57751  | 12163 | 14.2  | 100   |
| scaffold00416 | 18600  | 22876  | 4277  | 2.2   | C_unshiu_01201 | 58439  | 62716  | 4278  | 5     | 99.98 |
| scaffold00416 | 31298  | 32342  | 1045  | 0.54  | C_unshiu_00144 | 17963  | 16909  | 1055  | 0.27  | 98.48 |
| scaffold00416 | 33919  | 41895  | 7977  | 4.1   | C_unshiu_00144 | 12666  | 4682   | 7985  | 2.02  | 98.5  |
| scaffold00416 | 58137  | 73875  | 15739 | 8.1   | C_unshiu_01326 | 427    | 16257  | 15831 | 21.03 | 99.14 |
| scaffold00416 | 78852  | 81883  | 3032  | 1.56  | C_unshiu_01326 | 20701  | 23732  | 3032  | 4.03  | 98.71 |
| scaffold00416 | 81970  | 109941 | 27972 | 14.39 | C_unshiu_01326 | 23861  | 51812  | 27952 | 37.13 | 99.82 |
| scaffold00416 | 108744 | 118526 | 9783  | 5.03  | C_unshiu_01326 | 59488  | 69270  | 9783  | 13    | 99.84 |
| scaffold00416 | 118978 | 120877 | 1900  | 0.98  | C_unshiu_01326 | 69764  | 71663  | 1900  | 2.52  | 100   |
| scaffold00416 | 122205 | 126202 | 3998  | 2.06  | C_unshiu_01326 | 71276  | 75272  | 3997  | 5.31  | 98.11 |
| scaffold00416 | 131946 | 136183 | 4238  | 2.18  | C_unshiu_00651 | 52353  | 56600  | 4248  | 2.73  | 99.29 |
| scaffold00416 | 136531 | 140878 | 4348  | 2.24  | C_unshiu_00651 | 57346  | 61710  | 4365  | 2.81  | 98.72 |
| scaffold00416 | 144085 | 150133 | 6049  | 3.11  | C_unshiu_00651 | 63847  | 69890  | 6044  | 3.89  | 99.01 |
| scaffold00416 | 157014 | 176492 | 19479 | 10.02 | C_unshiu_01203 | 48040  | 67504  | 19465 | 22.81 | 99.89 |
| scaffold00416 | 177736 | 194115 | 16380 | 8.43  | C_unshiu_01203 | 68928  | 85349  | 16422 | 19.24 | 99.6  |
| scaffold00419 | 9266   | 10725  | 1460  | 0.75  | C_unshiu_00670 | 8661   | 7202   | 1460  | 0.96  | 99.93 |
| scaffold00419 | 10768  | 12451  | 1684  | 0.87  | C_unshiu_00670 | 14486  | 16171  | 1686  | 1.11  | 99.82 |
| scaffold00419 | 10768  | 12451  | 1684  | 0.87  | C_unshiu_01090 | 95362  | 93679  | 1684  | 1.73  | 100   |
| scaffold00419 | 13136  | 18222  | 5087  | 2.63  | C_unshiu_00670 | 5066   | 1      | 5066  | 3.32  | 98.69 |
| scaffold00419 | 23486  | 52605  | 29120 | 15.03 | C_unshiu_00670 | 25356  | 54431  | 29076 | 19.07 | 99.2  |
| scaffold00419 | 60460  | 61953  | 1494  | 0.77  | C_unshiu_00670 | 58943  | 60435  | 1493  | 0.98  | 99.93 |
| scaffold00419 | 73391  | 119307 | 45917 | 23.7  | C_unshiu_00670 | 74578  | 120540 | 45963 | 30.15 | 99.25 |
| scaffold00419 | 122470 | 130188 | 7719  | 3.98  | C_unshiu_00670 | 124650 | 132391 | 7742  | 5.08  | 98.06 |
| scaffold00419 | 131085 | 132981 | 1897  | 0.98  | C_unshiu_00670 | 134220 | 136118 | 1899  | 1.25  | 99.37 |
| scaffold00419 | 133484 | 136246 | 2763  | 1.43  | C_unshiu_00670 | 136912 | 139681 | 2770  | 1.82  | 99.06 |
| scaffold00419 | 136255 | 148655 | 12401 | 6.4   | C_unshiu_00670 | 140055 | 152463 | 12409 | 8.14  | 99.64 |
| scaffold00419 | 143193 | 156690 | 13498 | 6.97  | C_unshiu_00332 | 8667   | 22167  | 13501 | 5.37  | 99.43 |
| scaffold00419 | 161254 | 162710 | 1457  | 0.75  | C_unshiu_00743 | 102767 | 104223 | 1457  | 1.06  | 99.66 |
| scaffold00419 | 166969 | 170242 | 3274  | 1.69  | C_unshiu_00743 | 108882 | 112186 | 3305  | 2.41  | 98.49 |
| scaffold00419 | 170305 | 187649 | 17345 | 8.95  | C_unshiu_00743 | 112649 | 130007 | 17359 | 12.65 | 98.72 |
| scaffold00419 | 189942 | 192374 | 2433  | 1.26  | C_unshiu_02769 | 4778   | 2340   | 2439  | 13.11 | 98.61 |
| scaffold00419 | 192380 | 193702 | 1323  | 0.68  | C_unshiu_01083 | 48730  | 47401  | 1330  | 1.36  | 98.12 |
| scaffold00420 | 5644   | 7249   | 1606  | 0.83  | C_unshiu_00233 | 62065  | 60460  | 1606  | 0.53  | 100   |
| scaffold00420 | 7983   | 19259  | 11277 | 5.83  | C_unshiu_00233 | 59217  | 47941  | 11277 | 3.69  | 99.99 |
| scaffold00420 | 24119  | 26222  | 2104  | 1.09  | C_unshiu_01060 | 98268  | 96165  | 2104  | 2.12  | 99.86 |
| scaffold00420 | 26228  | 45088  | 18861 | 9.74  | C_unshiu_01060 | 95781  | 77109  | 18673 | 18.85 | 98.48 |
| scaffold00420 | 57047  | 58332  | 1286  | 0.66  | C_unshiu_00732 | 40299  | 39020  | 1280  | 0.92  | 98.68 |
| scaffold00420 | 62893  | 68750  | 5858  | 3.03  | C_unshiu_00732 | 36675  | 30876  | 5800  | 4.19  | 98.62 |

|               |        |        |       |       |                |        |        |       |       |       |
|---------------|--------|--------|-------|-------|----------------|--------|--------|-------|-------|-------|
| scaffold00420 | 71104  | 73241  | 2138  | 1.1   | C_unshiu_01060 | 1904   | 4041   | 2138  | 2.16  | 99.86 |
| scaffold00420 | 75833  | 78978  | 3146  | 1.63  | C_unshiu_01060 | 4893   | 8040   | 3148  | 3.18  | 99.24 |
| scaffold00420 | 78972  | 81268  | 2297  | 1.19  | C_unshiu_01060 | 8684   | 10976  | 2293  | 2.31  | 98.65 |
| scaffold00420 | 80614  | 82799  | 2186  | 1.13  | C_unshiu_01060 | 11027  | 13212  | 2186  | 2.21  | 99.68 |
| scaffold00420 | 83363  | 86081  | 2719  | 1.4   | C_unshiu_00674 | 75394  | 78112  | 2719  | 1.81  | 100   |
| scaffold00420 | 88033  | 90688  | 2656  | 1.37  | C_unshiu_01060 | 17531  | 20189  | 2659  | 2.68  | 99.47 |
| scaffold00420 | 92532  | 95712  | 3181  | 1.64  | C_unshiu_01060 | 21160  | 24340  | 3181  | 3.21  | 99.34 |
| scaffold00420 | 100044 | 101660 | 1617  | 0.84  | C_unshiu_01975 | 2047   | 3664   | 1618  | 3.89  | 99.26 |
| scaffold00420 | 109223 | 115354 | 6132  | 3.17  | C_unshiu_01975 | 9037   | 15169  | 6133  | 14.75 | 99.79 |
| scaffold00420 | 120308 | 135465 | 15158 | 7.83  | C_unshiu_01975 | 19200  | 34359  | 15160 | 36.45 | 99.91 |
| scaffold00420 | 135767 | 138374 | 2608  | 1.35  | C_unshiu_01975 | 35062  | 37671  | 2610  | 6.28  | 99.77 |
| scaffold00420 | 154520 | 156976 | 2457  | 1.27  | C_unshiu_01060 | 43845  | 46297  | 2453  | 2.48  | 99.55 |
| scaffold00420 | 161066 | 167452 | 6387  | 3.3   | C_unshiu_01060 | 47412  | 53831  | 6420  | 6.48  | 99    |
| scaffold00420 | 168385 | 171197 | 2813  | 1.45  | C_unshiu_01060 | 53996  | 56810  | 2815  | 2.84  | 99.18 |
| scaffold00420 | 177013 | 181690 | 4678  | 2.42  | C_unshiu_01060 | 75421  | 70747  | 4675  | 4.72  | 98.34 |
| scaffold00421 | 1      | 1232   | 1232  | 0.64  | C_unshiu_00124 | 379270 | 378039 | 1232  | 0.29  | 99.92 |
| scaffold00421 | 6234   | 15266  | 9033  | 4.67  | C_unshiu_00124 | 372739 | 363716 | 9024  | 2.15  | 99.75 |
| scaffold00421 | 15262  | 22915  | 7654  | 3.96  | C_unshiu_00124 | 363186 | 355531 | 7656  | 1.83  | 99.93 |
| scaffold00421 | 22940  | 53666  | 30727 | 15.89 | C_unshiu_00124 | 354784 | 324058 | 30727 | 7.33  | 99.99 |
| scaffold00421 | 54442  | 114603 | 60162 | 31.11 | C_unshiu_00124 | 322751 | 262597 | 60155 | 14.35 | 99.97 |
| scaffold00421 | 94610  | 121393 | 26784 | 13.85 | C_unshiu_00124 | 282579 | 255807 | 26773 | 6.39  | 99.96 |
| scaffold00421 | 120587 | 123210 | 2624  | 1.36  | C_unshiu_00124 | 244124 | 241511 | 2614  | 0.62  | 99.05 |
| scaffold00421 | 132592 | 168211 | 35620 | 18.42 | C_unshiu_00480 | 52     | 35694  | 35643 | 18.01 | 99.8  |
| scaffold00421 | 168341 | 185767 | 17427 | 9.01  | C_unshiu_00480 | 36425  | 53869  | 17445 | 8.81  | 99.89 |
| scaffold00421 | 187723 | 192527 | 4805  | 2.48  | C_unshiu_00480 | 55095  | 59899  | 4805  | 2.43  | 100   |
| scaffold00422 | 1      | 1032   | 1032  | 0.53  | C_unshiu_02472 | 12134  | 11101  | 1034  | 4.06  | 99.42 |
| scaffold00422 | 4613   | 9564   | 4952  | 2.56  | C_unshiu_02472 | 7347   | 2396   | 4952  | 19.45 | 99.94 |
| scaffold00422 | 10176  | 26963  | 16788 | 8.68  | C_unshiu_02156 | 1503   | 18293  | 16791 | 48.39 | 99.9  |
| scaffold00422 | 31927  | 33892  | 1966  | 1.02  | C_unshiu_02156 | 24589  | 26554  | 1966  | 5.67  | 100   |
| scaffold00422 | 108799 | 110696 | 1898  | 0.98  | C_unshiu_00410 | 208916 | 210813 | 1898  | 0.86  | 100   |
| scaffold00422 | 111474 | 115384 | 3911  | 2.02  | C_unshiu_00410 | 212016 | 215926 | 3911  | 1.77  | 100   |
| scaffold00422 | 115630 | 125266 | 9637  | 4.98  | C_unshiu_00226 | 98510  | 88866  | 9645  | 3.1   | 99.62 |
| scaffold00422 | 126101 | 131970 | 5870  | 3.04  | C_unshiu_00226 | 87579  | 81701  | 5879  | 1.89  | 99.05 |
| scaffold00422 | 141092 | 144981 | 3890  | 2.01  | C_unshiu_00226 | 78224  | 74384  | 3841  | 1.23  | 98.23 |
| scaffold00422 | 145339 | 148633 | 3295  | 1.7   | C_unshiu_00226 | 74708  | 71413  | 3296  | 1.06  | 99.06 |
| scaffold00422 | 152018 | 154354 | 2337  | 1.21  | C_unshiu_00226 | 68123  | 65785  | 2339  | 0.75  | 99.83 |
| scaffold00422 | 185375 | 187466 | 2092  | 1.08  | C_unshiu_00344 | 133441 | 131349 | 2093  | 0.84  | 99    |
| scaffold00425 | 4018   | 19671  | 15654 | 8.11  | C_unshiu_01294 | 5816   | 21424  | 15609 | 20.02 | 99.22 |
| scaffold00425 | 19181  | 65933  | 46753 | 24.22 | C_unshiu_01294 | 26017  | 72777  | 46761 | 59.97 | 99.96 |
| scaffold00425 | 67551  | 69290  | 1740  | 0.9   | C_unshiu_01294 | 74961  | 76697  | 1737  | 2.23  | 99.43 |
| scaffold00425 | 75434  | 77338  | 1905  | 0.99  | C_unshiu_01294 | 74598  | 72695  | 1904  | 2.44  | 98.16 |
| scaffold00425 | 78417  | 80136  | 1720  | 0.89  | C_unshiu_00251 | 285169 | 286888 | 1720  | 0.58  | 98.49 |
| scaffold00425 | 83779  | 92636  | 8858  | 4.59  | C_unshiu_00294 | 212317 | 203462 | 8856  | 3.29  | 99.36 |
| scaffold00425 | 93265  | 95019  | 1755  | 0.91  | C_unshiu_01009 | 61257  | 63011  | 1755  | 1.67  | 99.94 |
| scaffold00425 | 96813  | 100297 | 3485  | 1.81  | C_unshiu_01009 | 65736  | 69220  | 3485  | 3.32  | 100   |
| scaffold00425 | 100407 | 123333 | 22927 | 11.88 | C_unshiu_01009 | 69741  | 92674  | 22934 | 21.83 | 99.93 |
| scaffold00425 | 132646 | 137159 | 4514  | 2.34  | C_unshiu_01009 | 1460   | 5953   | 4494  | 4.28  | 98.27 |
| scaffold00425 | 141139 | 155766 | 14628 | 7.58  | C_unshiu_00294 | 256455 | 241850 | 14606 | 5.42  | 99.56 |
| scaffold00425 | 155995 | 160670 | 4676  | 2.42  | C_unshiu_01009 | 12376  | 17051  | 4676  | 4.45  | 100   |
| scaffold00425 | 161938 | 163229 | 1292  | 0.67  | C_unshiu_00294 | 241558 | 240268 | 1291  | 0.48  | 98.84 |
| scaffold00425 | 167603 | 169484 | 1882  | 0.97  | C_unshiu_01009 | 22797  | 24678  | 1882  | 1.79  | 99.95 |
| scaffold00425 | 170693 | 176957 | 6265  | 3.25  | C_unshiu_00294 | 238468 | 232202 | 6267  | 2.33  | 99.87 |
| scaffold00425 | 178845 | 180441 | 1597  | 0.83  | C_unshiu_00294 | 229953 | 228357 | 1597  | 0.59  | 99.94 |
| scaffold00425 | 180390 | 188090 | 7701  | 3.99  | C_unshiu_01009 | 30910  | 38619  | 7710  | 7.34  | 99.61 |
| scaffold00425 | 191806 | 193049 | 1244  | 0.64  | C_unshiu_00294 | 217022 | 215773 | 1250  | 0.46  | 98.72 |
| scaffold00429 | 3003   | 28765  | 25763 | 13.56 | C_unshiu_00472 | 25734  | 1      | 25734 | 12.81 | 99.86 |
| scaffold00429 | 26366  | 91627  | 65262 | 34.34 | C_unshiu_01154 | 90052  | 24806  | 65247 | 72.44 | 99.85 |
| scaffold00429 | 71622  | 101219 | 29598 | 15.57 | C_unshiu_01154 | 44798  | 15220  | 29579 | 32.84 | 99.91 |
| scaffold00429 | 101237 | 117140 | 15904 | 8.37  | C_unshiu_00315 | 35713  | 19790  | 15924 | 6.15  | 98.16 |
| scaffold00429 | 119498 | 120966 | 1469  | 0.77  | C_unshiu_00265 | 259659 | 261124 | 1466  | 0.51  | 99.59 |
| scaffold00429 | 142828 | 147315 | 4488  | 2.36  | C_unshiu_00651 | 111885 | 116376 | 4492  | 2.89  | 99.11 |
| scaffold00429 | 149033 | 157821 | 8789  | 4.62  | C_unshiu_00651 | 122511 | 131314 | 8804  | 5.66  | 98.04 |
| scaffold00429 | 158429 | 171877 | 13449 | 7.08  | C_unshiu_00333 | 15294  | 28735  | 13442 | 5.35  | 98.21 |
| scaffold00429 | 171917 | 174717 | 2801  | 1.47  | C_unshiu_00651 | 142262 | 145079 | 2818  | 1.81  | 98.52 |
| scaffold00430 | 768    | 60554  | 59787 | 31.59 | C_unshiu_00345 | 242840 | 183050 | 59791 | 24.13 | 99.84 |
| scaffold00430 | 61585  | 62961  | 1377  | 0.73  | C_unshiu_00345 | 182865 | 181489 | 1377  | 0.56  | 100   |
| scaffold00430 | 64123  | 65541  | 1419  | 0.75  | C_unshiu_00345 | 179899 | 178480 | 1420  | 0.57  | 99.93 |
| scaffold00430 | 65724  | 81556  | 15833 | 8.37  | C_unshiu_00345 | 177887 | 162001 | 15887 | 6.41  | 99.18 |
| scaffold00430 | 83491  | 86752  | 3262  | 1.72  | C_unshiu_00345 | 161938 | 158665 | 3274  | 1.32  | 99.11 |
| scaffold00430 | 99962  | 104972 | 5011  | 2.65  | C_unshiu_01737 | 1      | 5016   | 5016  | 9.81  | 99.42 |
| scaffold00430 | 108227 | 111767 | 3541  | 1.87  | C_unshiu_00345 | 138645 | 135105 | 3541  | 1.43  | 99.92 |
| scaffold00430 | 122906 | 125646 | 2741  | 1.45  | C_unshiu_01737 | 28994  | 31735  | 2742  | 5.36  | 99.13 |
| scaffold00430 | 132818 | 142944 | 10127 | 5.35  | C_unshiu_00345 | 114867 | 104761 | 10107 | 4.08  | 99.02 |
| scaffold00430 | 143292 | 169661 | 26370 | 13.94 | C_unshiu_01231 | 46796  | 20428  | 26369 | 32.06 | 99.99 |
| scaffold00430 | 171807 | 175399 | 3593  | 1.9   | C_unshiu_02786 | 1      | 3593   | 3593  | 19.81 | 100   |
| scaffold00430 | 175504 | 185164 | 9661  | 5.11  | C_unshiu_02786 | 3983   | 13643  | 9661  | 53.28 | 99.99 |
| scaffold00430 | 186292 | 187454 | 1163  | 0.61  | C_unshiu_02786 | 15087  | 16253  | 1167  | 6.44  | 99.06 |
| scaffold00431 | 1      | 5116   | 5116  | 2.72  | C_unshiu_01292 | 16856  | 21952  | 5097  | 6.52  | 98.71 |
| scaffold00431 | 11302  | 13570  | 2269  | 1.21  | C_unshiu_02114 | 15706  | 13436  | 2271  | 6.3   | 99.65 |

|               |        |        |       |       |                |        |        |       |       |       |
|---------------|--------|--------|-------|-------|----------------|--------|--------|-------|-------|-------|
| scaffold00431 | 17316  | 19635  | 2320  | 1.23  | C_unshiu_01612 | 35751  | 33432  | 2320  | 4.07  | 100   |
| scaffold00431 | 30582  | 34820  | 4239  | 2.25  | C_unshiu_00631 | 116051 | 111813 | 4239  | 2.64  | 99.88 |
| scaffold00431 | 34222  | 35244  | 1023  | 0.54  | C_unshiu_00773 | 27238  | 26216  | 1023  | 0.77  | 99.71 |
| scaffold00431 | 35844  | 40375  | 4532  | 2.41  | C_unshiu_00631 | 110384 | 105893 | 4492  | 2.8   | 98.41 |
| scaffold00431 | 41008  | 46876  | 5869  | 3.12  | C_unshiu_00631 | 104738 | 98870  | 5869  | 3.66  | 100   |
| scaffold00431 | 46898  | 56623  | 9726  | 5.17  | C_unshiu_00631 | 97838  | 88107  | 9732  | 6.07  | 98.38 |
| scaffold00431 | 56682  | 61018  | 4337  | 2.3   | C_unshiu_00631 | 87681  | 83331  | 4351  | 2.71  | 99.56 |
| scaffold00431 | 64111  | 65594  | 1484  | 0.79  | C_unshiu_01937 | 5302   | 3819   | 1484  | 3.43  | 99.73 |
| scaffold00431 | 66100  | 68730  | 2631  | 1.4   | C_unshiu_01157 | 73088  | 75716  | 2629  | 2.92  | 99.66 |
| scaffold00431 | 69984  | 71719  | 1736  | 0.92  | C_unshiu_01157 | 77476  | 79211  | 1736  | 1.93  | 100   |
| scaffold00431 | 71753  | 78030  | 6278  | 3.34  | C_unshiu_01157 | 79438  | 85715  | 6278  | 6.98  | 99.81 |
| scaffold00431 | 82169  | 91137  | 8969  | 4.77  | C_unshiu_01157 | 57258  | 48285  | 8974  | 9.98  | 99.77 |
| scaffold00431 | 91258  | 105925 | 14668 | 7.79  | C_unshiu_01157 | 47894  | 33191  | 14704 | 16.35 | 99.42 |
| scaffold00431 | 105969 | 107678 | 1710  | 0.91  | C_unshiu_01157 | 33289  | 31582  | 1708  | 1.9   | 99.82 |
| scaffold00431 | 107680 | 135851 | 28172 | 14.97 | C_unshiu_01157 | 31218  | 3037   | 28182 | 31.35 | 99.94 |
| scaffold00431 | 136458 | 139478 | 3021  | 1.61  | C_unshiu_01157 | 3021   | 1      | 3021  | 3.36  | 99.64 |
| scaffold00431 | 141424 | 142430 | 1007  | 0.54  | C_unshiu_01054 | 88260  | 87259  | 1002  | 1     | 98.21 |
| scaffold00431 | 142728 | 154867 | 12140 | 6.45  | C_unshiu_00648 | 145261 | 157265 | 12005 | 7.63  | 98.62 |
| scaffold00433 | 1      | 20358  | 20358 | 10.82 | C_unshiu_00642 | 83866  | 104314 | 20449 | 12.92 | 98.8  |
| scaffold00433 | 23229  | 29125  | 5897  | 3.13  | C_unshiu_00642 | 105025 | 110910 | 5886  | 3.72  | 99.05 |
| scaffold00433 | 29116  | 50235  | 21120 | 11.23 | C_unshiu_00642 | 112264 | 133306 | 21043 | 13.29 | 98.25 |
| scaffold00433 | 64255  | 91615  | 27361 | 14.54 | C_unshiu_00663 | 146536 | 119023 | 27514 | 17.95 | 98.73 |
| scaffold00433 | 93397  | 103351 | 9955  | 5.29  | C_unshiu_00663 | 117990 | 108012 | 9979  | 6.51  | 98.13 |
| scaffold00433 | 107151 | 114139 | 6989  | 3.71  | C_unshiu_00663 | 106225 | 99215  | 7011  | 4.57  | 99.6  |
| scaffold00433 | 118788 | 121210 | 2423  | 1.29  | C_unshiu_00663 | 88642  | 86224  | 2419  | 1.58  | 99.17 |
| scaffold00433 | 131659 | 135688 | 4030  | 2.14  | C_unshiu_00663 | 82551  | 78526  | 4026  | 2.63  | 99.21 |
| scaffold00433 | 136815 | 149516 | 12702 | 6.75  | C_unshiu_01095 | 93016  | 80316  | 12701 | 13.18 | 99.98 |
| scaffold00433 | 171284 | 173184 | 1901  | 1.01  | C_unshiu_01095 | 61001  | 59101  | 1901  | 1.97  | 100   |
| scaffold00434 | 41489  | 42664  | 1176  | 0.63  | C_unshiu_01492 | 21342  | 22517  | 1176  | 1.85  | 100   |
| scaffold00434 | 42821  | 44504  | 1684  | 0.9   | C_unshiu_00989 | 1      | 1684   | 1684  | 1.56  | 100   |
| scaffold00434 | 45378  | 47070  | 1693  | 0.9   | C_unshiu_00989 | 2785   | 4477   | 1693  | 1.57  | 100   |
| scaffold00434 | 48039  | 97037  | 48999 | 26.06 | C_unshiu_00989 | 5837   | 54843  | 49007 | 45.48 | 99.97 |
| scaffold00434 | 97119  | 114396 | 17278 | 9.19  | C_unshiu_00989 | 55105  | 72391  | 17287 | 16.04 | 99.85 |
| scaffold00434 | 114412 | 126777 | 12366 | 6.58  | C_unshiu_00989 | 73244  | 85609  | 12366 | 11.48 | 100   |
| scaffold00434 | 132407 | 162954 | 30548 | 16.25 | C_unshiu_01148 | 77814  | 47265  | 30550 | 33.55 | 99.96 |
| scaffold00434 | 164619 | 167562 | 2944  | 1.57  | C_unshiu_01148 | 46173  | 43230  | 2944  | 3.23  | 99.93 |
| scaffold00434 | 171438 | 173838 | 2401  | 1.28  | C_unshiu_01624 | 13     | 2413   | 2401  | 4.25  | 100   |
| scaffold00434 | 175243 | 177415 | 2173  | 1.16  | C_unshiu_02300 | 27708  | 29880  | 2173  | 7.27  | 99.91 |
| scaffold00437 | 19181  | 35769  | 16589 | 8.89  | C_unshiu_00654 | 50755  | 34069  | 16687 | 10.78 | 98.17 |
| scaffold00437 | 71714  | 75824  | 4111  | 2.2   | C_unshiu_01927 | 39739  | 43845  | 4107  | 9.37  | 98.18 |
| scaffold00437 | 76551  | 95925  | 19375 | 10.38 | C_unshiu_00588 | 56107  | 75534  | 19428 | 11.44 | 99.07 |
| scaffold00437 | 132367 | 141256 | 8890  | 4.76  | C_unshiu_00178 | 231385 | 222420 | 8966  | 2.49  | 98.77 |
| scaffold00437 | 140895 | 142192 | 1298  | 0.7   | C_unshiu_00178 | 222637 | 221340 | 1298  | 0.36  | 99.92 |
| scaffold00437 | 142338 | 164690 | 22353 | 11.97 | C_unshiu_00178 | 221206 | 198925 | 22282 | 6.19  | 99.03 |
| scaffold00437 | 168697 | 180561 | 11865 | 6.36  | C_unshiu_00178 | 196596 | 184735 | 11862 | 3.29  | 99.89 |
| scaffold00438 | 14511  | 25520  | 11010 | 5.92  | C_unshiu_02567 | 11131  | 113    | 11019 | 48.14 | 98.23 |
| scaffold00438 | 53509  | 58830  | 5322  | 2.86  | C_unshiu_02013 | 4175   | 9502   | 5328  | 13.27 | 99.36 |
| scaffold00438 | 68277  | 76951  | 8675  | 4.66  | C_unshiu_00879 | 24842  | 33518  | 8677  | 7.27  | 98.62 |
| scaffold00438 | 76542  | 82139  | 5598  | 3.01  | C_unshiu_00879 | 34612  | 40208  | 5597  | 4.69  | 99.68 |
| scaffold00438 | 84344  | 89284  | 4941  | 2.66  | C_unshiu_00879 | 42958  | 47850  | 4893  | 4.1   | 98.58 |
| scaffold00438 | 96363  | 103080 | 6718  | 3.61  | C_unshiu_01550 | 1      | 6718   | 6718  | 11.1  | 99.99 |
| scaffold00438 | 103168 | 119814 | 16647 | 8.95  | C_unshiu_01550 | 6806   | 23539  | 16734 | 27.65 | 98.87 |
| scaffold00438 | 121255 | 122368 | 1114  | 0.6   | C_unshiu_00200 | 270732 | 271846 | 1115  | 0.33  | 98.48 |
| scaffold00438 | 122390 | 130933 | 8544  | 4.59  | C_unshiu_01131 | 1106   | 9628   | 8523  | 9.2   | 98.56 |
| scaffold00438 | 134618 | 141352 | 6735  | 3.62  | C_unshiu_01131 | 10091  | 16825  | 6735  | 7.27  | 99.64 |
| scaffold00438 | 141569 | 142674 | 1106  | 0.59  | C_unshiu_00835 | 26564  | 25459  | 1106  | 0.89  | 99.91 |
| scaffold00438 | 143433 | 147398 | 3966  | 2.13  | C_unshiu_01550 | 27353  | 31304  | 3952  | 6.53  | 99.02 |
| scaffold00438 | 156164 | 163698 | 7535  | 4.05  | C_unshiu_01131 | 24731  | 32268  | 7538  | 8.14  | 99.84 |
| scaffold00438 | 163799 | 169533 | 5735  | 3.08  | C_unshiu_01131 | 32371  | 38105  | 5735  | 6.19  | 99.77 |
| scaffold00438 | 175216 | 176263 | 1048  | 0.56  | C_unshiu_01131 | 45039  | 46086  | 1048  | 1.13  | 99.99 |
| scaffold00438 | 176608 | 177642 | 1035  | 0.56  | C_unshiu_01131 | 46681  | 47721  | 1041  | 1.12  | 98.27 |
| scaffold00438 | 178787 | 183695 | 4909  | 2.64  | C_unshiu_01131 | 49119  | 54043  | 4925  | 5.32  | 99.41 |
| scaffold00439 | 6009   | 14012  | 8004  | 4.32  | C_unshiu_00713 | 53169  | 61175  | 8007  | 5.64  | 99.41 |
| scaffold00439 | 28865  | 30247  | 1383  | 0.75  | C_unshiu_00713 | 73843  | 75243  | 1401  | 0.99  | 98.36 |
| scaffold00439 | 30360  | 46126  | 15767 | 8.51  | C_unshiu_00713 | 75496  | 91262  | 15767 | 11.1  | 99.4  |
| scaffold00439 | 47573  | 53228  | 5656  | 3.05  | C_unshiu_01681 | 24041  | 29714  | 5674  | 10.62 | 99.1  |
| scaffold00439 | 55449  | 67443  | 11995 | 6.47  | C_unshiu_00807 | 127528 | 115558 | 11971 | 9.39  | 99.03 |
| scaffold00439 | 70946  | 73372  | 2427  | 1.31  | C_unshiu_00807 | 111595 | 109181 | 2415  | 1.89  | 98.6  |
| scaffold00439 | 74214  | 86241  | 12028 | 6.49  | C_unshiu_00807 | 109192 | 97164  | 12029 | 9.43  | 99.16 |
| scaffold00439 | 89610  | 103747 | 14138 | 7.63  | C_unshiu_00807 | 95229  | 80980  | 14250 | 11.17 | 98.51 |
| scaffold00439 | 103747 | 108936 | 5190  | 2.8   | C_unshiu_00807 | 80499  | 75296  | 5204  | 4.08  | 98.68 |
| scaffold00439 | 108949 | 110426 | 1478  | 0.8   | C_unshiu_00807 | 74473  | 72994  | 1480  | 1.16  | 98.85 |
| scaffold00439 | 113752 | 122130 | 8379  | 4.52  | C_unshiu_00807 | 63535  | 55157  | 8379  | 6.57  | 99.88 |
| scaffold00439 | 140647 | 143869 | 3223  | 1.74  | C_unshiu_00807 | 42538  | 39317  | 3222  | 2.53  | 98.55 |
| scaffold00439 | 148032 | 149539 | 1508  | 0.81  | C_unshiu_00807 | 31337  | 29824  | 1514  | 1.19  | 98.22 |
| scaffold00439 | 169348 | 170671 | 1324  | 0.71  | C_unshiu_01159 | 14353  | 15676  | 1324  | 1.47  | 100   |
| scaffold00439 | 171065 | 172586 | 1522  | 0.82  | C_unshiu_01159 | 15974  | 17494  | 1521  | 1.69  | 99.54 |
| scaffold00439 | 175288 | 178384 | 3097  | 1.67  | C_unshiu_01159 | 18929  | 22025  | 3097  | 3.45  | 100   |
| scaffold00439 | 178379 | 179920 | 1542  | 0.83  | C_unshiu_00251 | 35792  | 34251  | 1542  | 0.52  | 100   |

|               |        |        |       |       |                |        |        |       |       |       |
|---------------|--------|--------|-------|-------|----------------|--------|--------|-------|-------|-------|
| scaffold00439 | 179991 | 183840 | 3850  | 2.08  | C_unshiu_01159 | 10112  | 13988  | 3877  | 4.31  | 98.33 |
| scaffold00440 | 3156   | 24466  | 21311 | 11.51 | C_unshiu_00263 | 92603  | 71261  | 21343 | 7.49  | 99.39 |
| scaffold00440 | 24452  | 41788  | 17337 | 9.36  | C_unshiu_00263 | 71066  | 53744  | 17323 | 6.08  | 99.68 |
| scaffold00440 | 42435  | 65077  | 22643 | 12.23 | C_unshiu_00263 | 52977  | 30407  | 22571 | 7.92  | 98.86 |
| scaffold00440 | 67675  | 83008  | 15334 | 8.28  | C_unshiu_00263 | 21593  | 6241   | 15353 | 5.39  | 98.55 |
| scaffold00440 | 84858  | 110216 | 25359 | 13.69 | C_unshiu_01616 | 56891  | 31602  | 25290 | 44.45 | 98.25 |
| scaffold00440 | 112527 | 117233 | 4707  | 2.54  | C_unshiu_01616 | 29952  | 25244  | 4709  | 8.28  | 99.89 |
| scaffold00440 | 124553 | 134666 | 10114 | 5.46  | C_unshiu_00530 | 7824   | 17944  | 10121 | 5.5   | 98.09 |
| scaffold00440 | 146015 | 150647 | 4633  | 2.5   | C_unshiu_01124 | 22597  | 27231  | 4635  | 4.96  | 99.31 |
| scaffold00440 | 146027 | 179683 | 33657 | 18.17 | C_unshiu_00678 | 131623 | 97996  | 33628 | 22.57 | 99.19 |
| scaffold00441 | 3463   | 5173   | 1711  | 0.93  | C_unshiu_01135 | 54031  | 55725  | 1695  | 1.84  | 98.54 |
| scaffold00441 | 4155   | 52700  | 48546 | 26.43 | C_unshiu_00720 | 48544  | 1      | 48544 | 34.33 | 99.97 |
| scaffold00441 | 55117  | 57446  | 2330  | 1.27  | C_unshiu_01443 | 48063  | 50394  | 2332  | 3.47  | 99.27 |
| scaffold00441 | 58556  | 60826  | 2271  | 1.24  | C_unshiu_01443 | 56199  | 58469  | 2271  | 3.38  | 99.91 |
| scaffold00441 | 63730  | 70118  | 6389  | 3.48  | C_unshiu_01531 | 56896  | 50508  | 6389  | 10.38 | 99.97 |
| scaffold00441 | 71012  | 78714  | 7703  | 4.19  | C_unshiu_01531 | 48022  | 40342  | 7681  | 12.47 | 99.25 |
| scaffold00441 | 80234  | 81294  | 1061  | 0.58  | C_unshiu_01257 | 61332  | 62392  | 1061  | 1.32  | 99.91 |
| scaffold00441 | 89584  | 93389  | 3806  | 2.07  | C_unshiu_01257 | 66079  | 69868  | 3790  | 4.71  | 98.11 |
| scaffold00441 | 106376 | 116549 | 10174 | 5.54  | C_unshiu_00689 | 86802  | 76629  | 10174 | 6.95  | 100   |
| scaffold00441 | 116565 | 127398 | 10834 | 5.9   | C_unshiu_00689 | 76007  | 65174  | 10834 | 7.4   | 100   |
| scaffold00441 | 130801 | 139513 | 8713  | 4.74  | C_unshiu_00689 | 62719  | 54007  | 8713  | 5.95  | 100   |
| scaffold00441 | 149013 | 150058 | 1046  | 0.57  | C_unshiu_00050 | 114544 | 115589 | 1046  | 0.17  | 99.33 |
| scaffold00441 | 155288 | 163746 | 8459  | 4.61  | C_unshiu_01132 | 39816  | 31314  | 8503  | 9.19  | 99    |
| scaffold00441 | 167475 | 177664 | 10190 | 5.55  | C_unshiu_01132 | 27995  | 17806  | 10190 | 11.01 | 99.98 |
| scaffold00441 | 177727 | 181199 | 3473  | 1.89  | C_unshiu_01132 | 17533  | 14062  | 3472  | 3.75  | 99.97 |
| scaffold00443 | 1      | 1882   | 1882  | 1.03  | C_unshiu_00647 | 122441 | 124331 | 1891  | 1.2   | 98.94 |
| scaffold00443 | 3007   | 5876   | 2870  | 1.57  | C_unshiu_00573 | 72441  | 75289  | 2849  | 1.65  | 99.09 |
| scaffold00443 | 6054   | 7627   | 1574  | 0.86  | C_unshiu_00573 | 75628  | 77199  | 1572  | 0.91  | 99.75 |
| scaffold00443 | 7494   | 11935  | 4442  | 2.43  | C_unshiu_00573 | 77198  | 81631  | 4434  | 2.57  | 99.41 |
| scaffold00443 | 11935  | 18616  | 6682  | 3.66  | C_unshiu_00573 | 81765  | 88448  | 6684  | 3.87  | 98.81 |
| scaffold00443 | 19192  | 26143  | 6952  | 3.81  | C_unshiu_00573 | 90841  | 97792  | 6952  | 4.03  | 100   |
| scaffold00443 | 26196  | 42825  | 16630 | 9.1   | C_unshiu_00573 | 100679 | 117255 | 16577 | 9.6   | 99.25 |
| scaffold00443 | 42820  | 44466  | 1647  | 0.9   | C_unshiu_00573 | 119220 | 120860 | 1641  | 0.95  | 98.49 |
| scaffold00443 | 74477  | 75752  | 1276  | 0.7   | C_unshiu_00573 | 148842 | 150118 | 1277  | 0.74  | 99.92 |
| scaffold00443 | 76002  | 90337  | 14336 | 7.85  | C_unshiu_00573 | 151103 | 165450 | 14348 | 8.31  | 99.69 |
| scaffold00443 | 95107  | 97749  | 2643  | 1.45  | C_unshiu_00573 | 168898 | 171524 | 2627  | 1.52  | 98.79 |
| scaffold00443 | 119736 | 134161 | 14426 | 7.9   | C_unshiu_00798 | 1      | 14426  | 14426 | 11.23 | 99.99 |
| scaffold00443 | 134242 | 139285 | 5044  | 2.76  | C_unshiu_00798 | 14785  | 19828  | 5044  | 3.93  | 99.66 |
| scaffold00443 | 142714 | 144301 | 1588  | 0.87  | C_unshiu_00083 | 40480  | 38868  | 1613  | 0.34  | 98.45 |
| scaffold00443 | 149617 | 150832 | 1216  | 0.67  | C_unshiu_01141 | 86707  | 85489  | 1219  | 1.33  | 98.28 |
| scaffold00443 | 159000 | 182680 | 23681 | 12.96 | C_unshiu_00083 | 25712  | 2048   | 23665 | 5     | 99.88 |
| scaffold00445 | 3373   | 8616   | 5244  | 2.89  | C_unshiu_02019 | 1      | 5244   | 5244  | 13.12 | 100   |
| scaffold00445 | 10385  | 12341  | 1957  | 1.08  | C_unshiu_02019 | 7701   | 9657   | 1957  | 4.89  | 100   |
| scaffold00445 | 12471  | 13787  | 1317  | 0.73  | C_unshiu_02019 | 9824   | 11140  | 1317  | 3.29  | 99.77 |
| scaffold00445 | 14415  | 16162  | 1748  | 0.96  | C_unshiu_02019 | 12061  | 13808  | 1748  | 4.37  | 100   |
| scaffold00445 | 17094  | 18684  | 1591  | 0.88  | C_unshiu_00059 | 103789 | 105381 | 1593  | 0.27  | 99.18 |
| scaffold00445 | 20872  | 21906  | 1035  | 0.57  | C_unshiu_02019 | 18628  | 19662  | 1035  | 2.59  | 100   |
| scaffold00445 | 23673  | 28973  | 5301  | 2.92  | C_unshiu_01843 | 43001  | 37707  | 5295  | 11.32 | 99.75 |
| scaffold00445 | 29907  | 33066  | 3160  | 1.74  | C_unshiu_01843 | 36320  | 33160  | 3161  | 6.76  | 99.62 |
| scaffold00445 | 33114  | 35259  | 2146  | 1.18  | C_unshiu_01843 | 33246  | 31100  | 2147  | 4.59  | 99.91 |
| scaffold00445 | 58516  | 61165  | 2650  | 1.46  | C_unshiu_02146 | 1      | 2649   | 2649  | 7.52  | 99.96 |
| scaffold00445 | 61253  | 64188  | 2936  | 1.62  | C_unshiu_02146 | 2749   | 5684   | 2936  | 8.33  | 99.83 |
| scaffold00445 | 70500  | 73017  | 2518  | 1.39  | C_unshiu_02146 | 11111  | 13632  | 2522  | 7.16  | 99.64 |
| scaffold00445 | 72925  | 74205  | 1281  | 0.71  | C_unshiu_02146 | 13633  | 14913  | 1281  | 3.64  | 99.69 |
| scaffold00445 | 76975  | 79183  | 2209  | 1.22  | C_unshiu_01770 | 48328  | 46119  | 2210  | 4.46  | 99.95 |
| scaffold00445 | 79177  | 80832  | 1656  | 0.91  | C_unshiu_01001 | 15277  | 16932  | 1656  | 1.56  | 100   |
| scaffold00445 | 83290  | 85515  | 2226  | 1.23  | C_unshiu_02803 | 3336   | 5561   | 2226  | 12.47 | 100   |
| scaffold00445 | 85926  | 90902  | 4977  | 2.74  | C_unshiu_02803 | 6319   | 11283  | 4965  | 27.82 | 99.38 |
| scaffold00445 | 93899  | 97095  | 3197  | 1.76  | C_unshiu_02803 | 14636  | 17844  | 3209  | 17.98 | 98.91 |
| scaffold00445 | 101097 | 107950 | 6854  | 3.78  | C_unshiu_01770 | 22158  | 15347  | 6812  | 13.75 | 98.53 |
| scaffold00445 | 111683 | 122560 | 10878 | 6     | C_unshiu_01770 | 11985  | 1193   | 10793 | 21.79 | 99.11 |
| scaffold00445 | 153271 | 154929 | 1659  | 0.91  | C_unshiu_00059 | 72132  | 73783  | 1652  | 0.28  | 99.34 |
| scaffold00445 | 153272 | 154930 | 1659  | 0.91  | C_unshiu_02452 | 18673  | 17012  | 1662  | 6.36  | 98.56 |
| scaffold00445 | 160403 | 163016 | 2614  | 1.44  | C_unshiu_01806 | 5908   | 8521   | 2614  | 5.42  | 100   |
| scaffold00445 | 165909 | 170075 | 4167  | 2.3   | C_unshiu_02351 | 17385  | 13218  | 4168  | 14.69 | 99.78 |
| scaffold00445 | 176242 | 181351 | 5110  | 2.82  | C_unshiu_01783 | 48060  | 42955  | 5106  | 10.39 | 99.88 |
| scaffold00446 | 14613  | 25535  | 10923 | 6.03  | C_unshiu_00198 | 284601 | 273675 | 10927 | 3.25  | 99.81 |
| scaffold00446 | 47182  | 50995  | 3814  | 2.11  | C_unshiu_00538 | 131444 | 127648 | 3797  | 2.09  | 98.43 |
| scaffold00446 | 59921  | 64320  | 4400  | 2.43  | C_unshiu_00538 | 127634 | 123206 | 4429  | 2.44  | 98.26 |
| scaffold00446 | 64557  | 69384  | 4828  | 2.67  | C_unshiu_00538 | 122528 | 117679 | 4850  | 2.67  | 99.11 |
| scaffold00446 | 112258 | 135375 | 23118 | 12.77 | C_unshiu_00538 | 68841  | 45651  | 23191 | 12.77 | 99.12 |
| scaffold00446 | 136162 | 138334 | 2173  | 1.2   | C_unshiu_02794 | 16511  | 14337  | 2175  | 12.08 | 99.13 |
| scaffold00446 | 139287 | 146381 | 7095  | 3.92  | C_unshiu_00538 | 41212  | 34118  | 7095  | 3.91  | 99.96 |
| scaffold00446 | 146696 | 174003 | 27308 | 15.08 | C_unshiu_00538 | 33795  | 6496   | 27300 | 15.03 | 99.6  |
| scaffold00448 | 6839   | 16547  | 9709  | 5.4   | C_unshiu_01312 | 26000  | 35766  | 9767  | 12.83 | 98.66 |
| scaffold00448 | 20840  | 22071  | 1232  | 0.68  | C_unshiu_00922 | 5412   | 6645   | 1234  | 1.08  | 99.84 |
| scaffold00448 | 31732  | 34237  | 2506  | 1.39  | C_unshiu_01312 | 46411  | 48916  | 2506  | 3.29  | 100   |
| scaffold00448 | 38238  | 39359  | 1122  | 0.62  | C_unshiu_01312 | 3640   | 2520   | 1121  | 1.47  | 98.75 |
| scaffold00448 | 41500  | 44096  | 2597  | 1.44  | C_unshiu_00482 | 91992  | 94588  | 2597  | 1.32  | 100   |

|               |        |        |       |       |                |        |        |       |       |       |
|---------------|--------|--------|-------|-------|----------------|--------|--------|-------|-------|-------|
| scaffold00448 | 44097  | 47518  | 3422  | 1.9   | C_unshiu_00854 | 109775 | 106339 | 3437  | 2.81  | 98.02 |
| scaffold00448 | 53926  | 58144  | 4219  | 2.34  | C_unshiu_00854 | 96525  | 92295  | 4231  | 3.46  | 99.1  |
| scaffold00448 | 69314  | 76212  | 6899  | 3.83  | C_unshiu_00854 | 81752  | 74890  | 6863  | 5.61  | 98.26 |
| scaffold00448 | 77992  | 97353  | 19362 | 10.76 | C_unshiu_00854 | 73289  | 53858  | 19432 | 15.89 | 98.66 |
| scaffold00448 | 95789  | 97801  | 2013  | 1.12  | C_unshiu_02117 | 35979  | 33968  | 2012  | 5.59  | 98.61 |
| scaffold00448 | 98187  | 106557 | 8371  | 4.65  | C_unshiu_00854 | 53692  | 45325  | 8368  | 6.84  | 98.78 |
| scaffold00448 | 106575 | 129993 | 23419 | 13.02 | C_unshiu_02117 | 24196  | 779    | 23418 | 65.09 | 99.48 |
| scaffold00448 | 170370 | 172116 | 1747  | 0.97  | C_unshiu_00232 | 170154 | 168407 | 1748  | 0.57  | 99.43 |
| scaffold00450 | 2722   | 4832   | 2111  | 1.19  | C_unshiu_00117 | 425677 | 427787 | 2111  | 0.49  | 99.62 |
| scaffold00450 | 6191   | 20799  | 14609 | 8.24  | C_unshiu_01700 | 21958  | 36579  | 14622 | 27.83 | 99.77 |
| scaffold00450 | 20543  | 36642  | 16100 | 9.08  | C_unshiu_01700 | 36461  | 52532  | 16072 | 30.59 | 99.63 |
| scaffold00450 | 73700  | 110193 | 36494 | 20.59 | C_unshiu_00426 | 129599 | 166028 | 36430 | 16.78 | 99.8  |
| scaffold00450 | 110505 | 112967 | 2463  | 1.39  | C_unshiu_00426 | 166311 | 168773 | 2463  | 1.13  | 99.88 |
| scaffold00450 | 113354 | 116007 | 2654  | 1.5   | C_unshiu_00426 | 169423 | 172060 | 2638  | 1.21  | 98.8  |
| scaffold00450 | 118639 | 121362 | 2724  | 1.54  | C_unshiu_00426 | 173140 | 175863 | 2724  | 1.25  | 100   |
| scaffold00450 | 126107 | 131243 | 5137  | 2.9   | C_unshiu_01098 | 6806   | 11943  | 5138  | 5.34  | 99.98 |
| scaffold00450 | 133935 | 142533 | 8599  | 4.85  | C_unshiu_01098 | 15247  | 23845  | 8599  | 8.94  | 99.97 |
| scaffold00450 | 149697 | 159766 | 10070 | 5.68  | C_unshiu_01098 | 31564  | 41643  | 10080 | 10.48 | 99.9  |
| scaffold00450 | 166553 | 177084 | 10532 | 5.94  | C_unshiu_01098 | 51832  | 62363  | 10532 | 10.95 | 100   |
| scaffold00451 | 1197   | 4382   | 3186  | 1.8   | C_unshiu_01390 | 53742  | 56931  | 3190  | 4.49  | 98.71 |
| scaffold00451 | 6339   | 10210  | 3872  | 2.19  | C_unshiu_01390 | 57791  | 61669  | 3879  | 5.47  | 99.82 |
| scaffold00451 | 11330  | 13278  | 1949  | 1.1   | C_unshiu_01390 | 63279  | 65227  | 1949  | 2.75  | 98.82 |
| scaffold00451 | 13280  | 14327  | 1048  | 0.59  | C_unshiu_01390 | 61924  | 62967  | 1044  | 1.47  | 99.62 |
| scaffold00451 | 29603  | 37166  | 7564  | 4.28  | C_unshiu_02183 | 1      | 7564   | 7564  | 22.33 | 99.95 |
| scaffold00451 | 59599  | 61193  | 1595  | 0.9   | C_unshiu_00543 | 2928   | 4522   | 1595  | 0.89  | 99.44 |
| scaffold00451 | 65926  | 69388  | 3463  | 1.96  | C_unshiu_00543 | 9542   | 13026  | 3485  | 1.94  | 98.74 |
| scaffold00451 | 78094  | 119288 | 41195 | 23.29 | C_unshiu_00543 | 21779  | 63154  | 41376 | 23.03 | 98.76 |
| scaffold00451 | 119283 | 121875 | 2593  | 1.47  | C_unshiu_01092 | 59258  | 56666  | 2593  | 2.68  | 100   |
| scaffold00451 | 123535 | 133751 | 10217 | 5.78  | C_unshiu_00543 | 66725  | 76886  | 10162 | 5.66  | 98.38 |
| scaffold00451 | 133750 | 147933 | 14184 | 8.02  | C_unshiu_00543 | 77064  | 91244  | 14181 | 7.89  | 98.99 |
| scaffold00451 | 148468 | 150015 | 1548  | 0.88  | C_unshiu_00543 | 92374  | 93923  | 1550  | 0.86  | 99.03 |
| scaffold00452 | 1      | 1231   | 1231  | 0.7   | C_unshiu_01304 | 17604  | 18839  | 1236  | 1.6   | 99.11 |
| scaffold00452 | 1236   | 3297   | 2062  | 1.17  | C_unshiu_00263 | 276290 | 274230 | 2061  | 0.72  | 99.81 |
| scaffold00452 | 8812   | 44227  | 35416 | 20.12 | C_unshiu_00493 | 133303 | 97954  | 35350 | 18.19 | 99.55 |
| scaffold00452 | 48927  | 59493  | 10567 | 6     | C_unshiu_00493 | 93790  | 83224  | 10567 | 5.44  | 100   |
| scaffold00452 | 60720  | 80121  | 19402 | 11.02 | C_unshiu_00493 | 83184  | 63716  | 19469 | 10.02 | 98.6  |
| scaffold00452 | 98309  | 105383 | 7075  | 4.02  | C_unshiu_00493 | 44425  | 37364  | 7062  | 3.63  | 98.6  |
| scaffold00452 | 121099 | 122566 | 1468  | 0.83  | C_unshiu_00493 | 18973  | 17501  | 1473  | 0.76  | 98.71 |
| scaffold00452 | 137167 | 138631 | 1465  | 0.83  | C_unshiu_00493 | 4538   | 3076   | 1463  | 0.75  | 99.86 |
| scaffold00452 | 140056 | 142278 | 2223  | 1.26  | C_unshiu_00493 | 2223   | 1      | 2223  | 1.14  | 99.73 |
| scaffold00452 | 142171 | 162983 | 20813 | 11.83 | C_unshiu_02030 | 31994  | 11157  | 20838 | 52.71 | 98.1  |
| scaffold00452 | 168651 | 169761 | 1111  | 0.63  | C_unshiu_00116 | 136934 | 138041 | 1108  | 0.26  | 98.83 |
| scaffold00453 | 1      | 1390   | 1390  | 0.79  | C_unshiu_01784 | 4235   | 5622   | 1388  | 2.83  | 99.06 |
| scaffold00453 | 112    | 10425  | 10314 | 5.87  | C_unshiu_00829 | 105087 | 94702  | 10386 | 8.32  | 98.18 |
| scaffold00453 | 19599  | 21350  | 1752  | 1     | C_unshiu_00829 | 117874 | 116124 | 1751  | 1.4   | 99.94 |
| scaffold00453 | 21759  | 23463  | 1705  | 0.97  | C_unshiu_00829 | 111204 | 109500 | 1705  | 1.37  | 99.94 |
| scaffold00453 | 23837  | 24886  | 1050  | 0.6   | C_unshiu_00829 | 113144 | 112095 | 1050  | 0.84  | 99.43 |
| scaffold00453 | 24969  | 26599  | 1631  | 0.93  | C_unshiu_00829 | 111818 | 110185 | 1634  | 1.31  | 98.41 |
| scaffold00453 | 32357  | 43559  | 11203 | 6.38  | C_unshiu_00956 | 66706  | 55499  | 11208 | 10.09 | 99.38 |
| scaffold00453 | 46672  | 59725  | 13054 | 7.43  | C_unshiu_00956 | 52138  | 39082  | 13057 | 11.76 | 99.81 |
| scaffold00453 | 59981  | 66043  | 6063  | 3.45  | C_unshiu_00956 | 38303  | 32227  | 6077  | 5.47  | 99.54 |
| scaffold00453 | 69761  | 71097  | 1337  | 0.76  | C_unshiu_00482 | 107877 | 106541 | 1337  | 0.68  | 99.33 |
| scaffold00453 | 71355  | 73509  | 2155  | 1.23  | C_unshiu_00956 | 28275  | 26121  | 2155  | 1.94  | 100   |
| scaffold00453 | 80106  | 81688  | 1583  | 0.9   | C_unshiu_00482 | 91632  | 90051  | 1582  | 0.8   | 99.94 |
| scaffold00453 | 82035  | 83403  | 1369  | 0.78  | C_unshiu_00482 | 96349  | 94979  | 1371  | 0.69  | 99.56 |
| scaffold00453 | 98233  | 132897 | 34665 | 19.73 | C_unshiu_00956 | 100551 | 66043  | 34509 | 31.08 | 98.88 |
| scaffold00453 | 162773 | 164672 | 1900  | 1.08  | C_unshiu_02398 | 16101  | 14203  | 1899  | 6.95  | 99.47 |
| scaffold00454 | 922    | 14745  | 13824 | 7.88  | C_unshiu_00866 | 96294  | 82494  | 13801 | 11.42 | 99.45 |
| scaffold00454 | 16957  | 19572  | 2616  | 1.49  | C_unshiu_00645 | 87     | 2702   | 2616  | 1.65  | 100   |
| scaffold00454 | 21061  | 56107  | 35047 | 19.98 | C_unshiu_00645 | 4237   | 39268  | 35032 | 22.15 | 99.95 |
| scaffold00454 | 60572  | 64363  | 3792  | 2.16  | C_unshiu_00645 | 43337  | 47109  | 3773  | 2.39  | 99.47 |
| scaffold00454 | 86577  | 88236  | 1660  | 0.95  | C_unshiu_00645 | 68890  | 70549  | 1660  | 1.05  | 100   |
| scaffold00454 | 90792  | 108463 | 17672 | 10.07 | C_unshiu_00645 | 71471  | 89101  | 17631 | 11.15 | 99.22 |
| scaffold00454 | 110486 | 118725 | 8240  | 4.7   | C_unshiu_02399 | 27330  | 19091  | 8240  | 30.15 | 99.95 |
| scaffold00454 | 118735 | 120208 | 1474  | 0.84  | C_unshiu_02399 | 18583  | 17110  | 1474  | 5.39  | 99.93 |
| scaffold00454 | 121392 | 124199 | 2808  | 1.6   | C_unshiu_02399 | 15540  | 12733  | 2808  | 10.27 | 100   |
| scaffold00454 | 124200 | 125722 | 1523  | 0.87  | C_unshiu_00038 | 567390 | 565868 | 1523  | 0.23  | 100   |
| scaffold00454 | 125720 | 136243 | 10524 | 6     | C_unshiu_02399 | 10582  | 1      | 10582 | 38.72 | 98.98 |
| scaffold00454 | 132813 | 159859 | 27047 | 15.42 | C_unshiu_00325 | 254681 | 227577 | 27105 | 10.64 | 99.15 |
| scaffold00454 | 160281 | 164414 | 4134  | 2.36  | C_unshiu_01021 | 85400  | 81267  | 4134  | 3.98  | 100   |
| scaffold00454 | 164904 | 167712 | 2809  | 1.6   | C_unshiu_01021 | 80645  | 77837  | 2809  | 2.71  | 99.89 |
| scaffold00454 | 167473 | 171731 | 4259  | 2.43  | C_unshiu_01021 | 77957  | 73699  | 4259  | 4.1   | 99.88 |
| scaffold00454 | 171739 | 175408 | 3670  | 2.09  | C_unshiu_00325 | 215956 | 212285 | 3672  | 1.44  | 99.95 |
| scaffold00455 | 870    | 2388   | 1519  | 0.87  | C_unshiu_00881 | 57025  | 58539  | 1515  | 1.27  | 99.28 |
| scaffold00455 | 24123  | 27518  | 3396  | 1.94  | C_unshiu_00881 | 50938  | 54333  | 3396  | 2.85  | 99.56 |
| scaffold00455 | 35819  | 37225  | 1407  | 0.8   | C_unshiu_00680 | 107346 | 108754 | 1409  | 0.95  | 99.57 |
| scaffold00455 | 46357  | 60722  | 14366 | 8.19  | C_unshiu_00680 | 114903 | 129228 | 14326 | 9.64  | 99.14 |
| scaffold00455 | 64978  | 77153  | 12176 | 6.95  | C_unshiu_00680 | 136367 | 148543 | 12177 | 8.2   | 99.66 |
| scaffold00455 | 79551  | 82043  | 2493  | 1.42  | C_unshiu_02849 | 15800  | 13305  | 2496  | 14.95 | 99.72 |

|               |        |        |       |       |                |         |         |       |       |       |
|---------------|--------|--------|-------|-------|----------------|---------|---------|-------|-------|-------|
| scaffold00455 | 82063  | 89605  | 7543  | 4.3   | C_unshiu_02849 | 13199   | 5654    | 7546  | 45.21 | 99.52 |
| scaffold00455 | 89783  | 113612 | 23830 | 13.59 | C_unshiu_01509 | 56863   | 32959   | 23905 | 38.12 | 99.14 |
| scaffold00455 | 113619 | 117230 | 3612  | 2.06  | C_unshiu_01509 | 32602   | 29021   | 3582  | 5.71  | 98.42 |
| scaffold00455 | 117266 | 118442 | 1177  | 0.67  | C_unshiu_01509 | 28323   | 27147   | 1177  | 1.88  | 99.49 |
| scaffold00455 | 124589 | 126090 | 1502  | 0.86  | C_unshiu_01508 | 1       | 1502    | 1502  | 2.39  | 99.47 |
| scaffold00455 | 127298 | 135742 | 8445  | 4.82  | C_unshiu_02347 | 12693   | 4248    | 8446  | 29.75 | 99.73 |
| scaffold00455 | 136470 | 137811 | 1342  | 0.77  | C_unshiu_02347 | 3076    | 1733    | 1344  | 4.73  | 99.78 |
| scaffold00455 | 165227 | 166823 | 1597  | 0.91  | C_unshiu_01508 | 20987   | 22581   | 1595  | 2.54  | 99.12 |
| scaffold00455 | 165779 | 168313 | 2535  | 1.45  | C_unshiu_02191 | 6233    | 8770    | 2538  | 7.57  | 98.86 |
| scaffold00455 | 172390 | 175317 | 2928  | 1.67  | C_unshiu_02191 | 12195   | 15109   | 2915  | 8.69  | 99.52 |
| scaffold00456 | 957    | 2162   | 1206  | 0.69  | C_unshiu_02879 | 12485   | 11279   | 1207  | 7.43  | 98.68 |
| scaffold00456 | 2156   | 3465   | 1310  | 0.75  | C_unshiu_01821 | 36738   | 35429   | 1310  | 2.74  | 100   |
| scaffold00456 | 5586   | 6770   | 1185  | 0.68  | C_unshiu_00006 | 1117382 | 1116194 | 1189  | 0.11  | 99.24 |
| scaffold00456 | 9946   | 11017  | 1072  | 0.61  | C_unshiu_02123 | 26392   | 27463   | 1072  | 2.99  | 98.51 |
| scaffold00456 | 11018  | 16043  | 5026  | 2.87  | C_unshiu_00006 | 1111777 | 1106752 | 5026  | 0.45  | 100   |
| scaffold00456 | 22799  | 26649  | 3851  | 2.2   | C_unshiu_00006 | 1099311 | 1095461 | 3851  | 0.34  | 99.43 |
| scaffold00456 | 26644  | 29626  | 2983  | 1.7   | C_unshiu_00393 | 86099   | 89081   | 2983  | 1.33  | 100   |
| scaffold00456 | 29707  | 36986  | 7280  | 4.16  | C_unshiu_00006 | 1093079 | 1085795 | 7285  | 0.65  | 99.55 |
| scaffold00456 | 37038  | 51816  | 14779 | 8.44  | C_unshiu_00006 | 1085587 | 1070838 | 14750 | 1.31  | 98.83 |
| scaffold00456 | 52449  | 55380  | 2932  | 1.67  | C_unshiu_02601 | 7447    | 10387   | 2941  | 13.33 | 98.51 |
| scaffold00456 | 54225  | 58164  | 3940  | 2.25  | C_unshiu_02601 | 18132   | 22056   | 3925  | 17.8  | 98.43 |
| scaffold00456 | 68959  | 76718  | 7760  | 4.43  | C_unshiu_01605 | 55238   | 47486   | 7753  | 13.56 | 99.56 |
| scaffold00456 | 83084  | 84831  | 1748  | 1     | C_unshiu_01605 | 40882   | 39145   | 1738  | 3.04  | 98.12 |
| scaffold00456 | 97905  | 111729 | 13825 | 7.89  | C_unshiu_01605 | 27330   | 13584   | 13747 | 24.03 | 98.17 |
| scaffold00456 | 114755 | 116197 | 1443  | 0.82  | C_unshiu_01605 | 11529   | 10087   | 1443  | 2.52  | 100   |
| scaffold00456 | 116287 | 124142 | 7856  | 4.48  | C_unshiu_00099 | 449880  | 442019  | 7862  | 1.72  | 98.98 |
| scaffold00456 | 122225 | 165881 | 43657 | 24.92 | C_unshiu_01319 | 1       | 43652   | 43652 | 57.79 | 99.84 |
| scaffold00456 | 166540 | 171682 | 5143  | 2.94  | C_unshiu_01319 | 44638   | 49780   | 5143  | 6.81  | 100   |
| scaffold00456 | 171979 | 175165 | 3187  | 1.82  | C_unshiu_01319 | 50371   | 53569   | 3199  | 4.24  | 99.37 |
| scaffold00457 | 1      | 9427   | 9427  | 5.39  | C_unshiu_00906 | 492     | 9848    | 9357  | 8.04  | 98.52 |
| scaffold00457 | 10722  | 24377  | 13656 | 7.8   | C_unshiu_01040 | 95967   | 82369   | 13599 | 13.33 | 98.38 |
| scaffold00457 | 29511  | 34452  | 4942  | 2.82  | C_unshiu_01040 | 76472   | 71530   | 4943  | 4.84  | 99.72 |
| scaffold00457 | 56003  | 60093  | 4091  | 2.34  | C_unshiu_01040 | 58429   | 54339   | 4091  | 4.01  | 100   |
| scaffold00457 | 58162  | 60093  | 1932  | 1.1   | C_unshiu_01040 | 51716   | 49784   | 1933  | 1.89  | 99.95 |
| scaffold00457 | 66151  | 72516  | 6366  | 3.64  | C_unshiu_01040 | 43999   | 37635   | 6365  | 6.24  | 99.98 |
| scaffold00457 | 87363  | 108311 | 20949 | 11.97 | C_unshiu_01040 | 23515   | 2626    | 20890 | 20.48 | 98.96 |
| scaffold00457 | 112946 | 114116 | 1171  | 0.67  | C_unshiu_01040 | 1181    | 1       | 1181  | 1.16  | 98.9  |
| scaffold00457 | 121881 | 123016 | 1136  | 0.65  | C_unshiu_01040 | 2625    | 1488    | 1138  | 1.12  | 98.33 |
| scaffold00457 | 122488 | 130601 | 8114  | 4.64  | C_unshiu_02136 | 17271   | 9153    | 8119  | 22.89 | 98.71 |
| scaffold00457 | 136862 | 143552 | 6691  | 3.82  | C_unshiu_00533 | 7202    | 13923   | 6722  | 3.68  | 98.72 |
| scaffold00457 | 144058 | 168360 | 24303 | 13.89 | C_unshiu_01608 | 57123   | 32822   | 24302 | 42.54 | 98.86 |
| scaffold00457 | 169580 | 171768 | 2189  | 1.25  | C_unshiu_01608 | 31336   | 29148   | 2189  | 3.83  | 98.54 |
| scaffold00458 | 2588   | 11272  | 8685  | 5     | C_unshiu_00378 | 145041  | 136367  | 8675  | 3.77  | 98.98 |
| scaffold00458 | 2667   | 33552  | 30886 | 17.78 | C_unshiu_00664 | 81031   | 50126   | 30906 | 20.16 | 98.51 |
| scaffold00458 | 33547  | 35424  | 1878  | 1.08  | C_unshiu_00349 | 217214  | 215337  | 1878  | 0.77  | 100   |
| scaffold00458 | 38520  | 43508  | 4989  | 2.87  | C_unshiu_00378 | 164493  | 159456  | 5038  | 2.19  | 98.89 |
| scaffold00458 | 69921  | 98222  | 28302 | 16.3  | C_unshiu_00397 | 59559   | 31272   | 28288 | 12.66 | 99.31 |
| scaffold00458 | 99499  | 101655 | 2157  | 1.24  | C_unshiu_00397 | 29471   | 27316   | 2156  | 0.96  | 99.95 |
| scaffold00458 | 102922 | 108030 | 5109  | 2.94  | C_unshiu_00397 | 25545   | 20435   | 5111  | 2.29  | 99.18 |
| scaffold00458 | 114909 | 117244 | 2336  | 1.35  | C_unshiu_00397 | 18967   | 16632   | 2336  | 1.05  | 99.91 |
| scaffold00458 | 117343 | 118576 | 1234  | 0.71  | C_unshiu_00397 | 16501   | 15268   | 1234  | 0.55  | 99.92 |
| scaffold00458 | 118577 | 131153 | 12577 | 7.24  | C_unshiu_00397 | 15333   | 2747    | 12587 | 5.63  | 99.84 |
| scaffold00458 | 127757 | 139903 | 12147 | 6.99  | C_unshiu_00165 | 249583  | 261729  | 12147 | 3.28  | 99.05 |
| scaffold00458 | 140771 | 151656 | 10886 | 6.27  | C_unshiu_00165 | 262359  | 273245  | 10887 | 2.94  | 98.27 |
| scaffold00458 | 151650 | 153518 | 1869  | 1.08  | C_unshiu_01884 | 30633   | 32501   | 1869  | 4.13  | 100   |
| scaffold00458 | 153519 | 171192 | 17674 | 10.18 | C_unshiu_00165 | 274375  | 292046  | 17672 | 4.78  | 99.92 |
| scaffold00458 | 171576 | 173664 | 2089  | 1.2   | C_unshiu_00358 | 83979   | 86057   | 2079  | 0.88  | 99.04 |
| scaffold00459 | 3221   | 19714  | 16494 | 9.5   | C_unshiu_00655 | 152293  | 135824  | 16470 | 10.64 | 99.44 |
| scaffold00459 | 19296  | 25867  | 6572  | 3.79  | C_unshiu_00197 | 172353  | 178905  | 6553  | 1.94  | 98.26 |
| scaffold00459 | 41282  | 51859  | 10578 | 6.09  | C_unshiu_01217 | 11510   | 940     | 10571 | 12.58 | 99.78 |
| scaffold00459 | 54762  | 56220  | 1459  | 0.84  | C_unshiu_01765 | 49828   | 48365   | 1464  | 2.94  | 99.25 |
| scaffold00459 | 58742  | 61420  | 2679  | 1.54  | C_unshiu_01765 | 47891   | 45214   | 2678  | 5.37  | 98.77 |
| scaffold00459 | 70379  | 75948  | 5570  | 3.21  | C_unshiu_01971 | 26491   | 20927   | 5565  | 13.35 | 98.43 |
| scaffold00459 | 72746  | 86691  | 13946 | 8.03  | C_unshiu_01765 | 38710   | 24706   | 14005 | 28.11 | 98.97 |
| scaffold00459 | 101653 | 118891 | 17239 | 9.93  | C_unshiu_01803 | 1       | 17237   | 17237 | 35.63 | 99.54 |
| scaffold00459 | 170904 | 172126 | 1223  | 0.7   | C_unshiu_01492 | 22511   | 21289   | 1223  | 1.92  | 100   |
| scaffold00460 | 1608   | 8214   | 6607  | 3.81  | C_unshiu_03026 | 10101   | 3494    | 6608  | 54.07 | 99.98 |
| scaffold00460 | 16835  | 21100  | 4266  | 2.46  | C_unshiu_00361 | 190374  | 194638  | 4265  | 1.8   | 99.93 |
| scaffold00460 | 24684  | 28759  | 4076  | 2.35  | C_unshiu_00135 | 358093  | 354032  | 4062  | 1     | 98.6  |
| scaffold00460 | 45212  | 46482  | 1271  | 0.73  | C_unshiu_00361 | 209197  | 210467  | 1271  | 0.54  | 100   |
| scaffold00460 | 48709  | 59283  | 10575 | 6.1   | C_unshiu_00361 | 213680  | 224254  | 10575 | 4.47  | 100   |
| scaffold00460 | 62536  | 65104  | 2569  | 1.48  | C_unshiu_02060 | 9624    | 7056    | 2569  | 6.71  | 99.92 |
| scaffold00460 | 92432  | 93559  | 1128  | 0.65  | C_unshiu_01235 | 73013   | 71885   | 1129  | 1.38  | 99.03 |
| scaffold00460 | 94436  | 95467  | 1032  | 0.6   | C_unshiu_00452 | 149951  | 148920  | 1032  | 0.5   | 99.71 |
| scaffold00460 | 94572  | 95802  | 1231  | 0.71  | C_unshiu_00441 | 166658  | 167888  | 1231  | 0.58  | 99.51 |
| scaffold00460 | 106497 | 112108 | 5612  | 3.24  | C_unshiu_01235 | 60723   | 55133   | 5591  | 6.82  | 99.47 |
| scaffold00460 | 112109 | 120780 | 8672  | 5     | C_unshiu_01235 | 54760   | 46089   | 8672  | 10.57 | 99.88 |
| scaffold00460 | 120890 | 143708 | 22819 | 13.16 | C_unshiu_01235 | 44660   | 21842   | 22819 | 27.82 | 99.87 |
| scaffold00460 | 144804 | 146592 | 1789  | 1.03  | C_unshiu_01235 | 20376   | 18588   | 1789  | 2.18  | 100   |

|               |        |        |       |       |                |        |        |       |       |       |
|---------------|--------|--------|-------|-------|----------------|--------|--------|-------|-------|-------|
| scaffold00460 | 161042 | 164470 | 3429  | 1.98  | C_unshiu_01235 | 6098   | 2670   | 3429  | 4.18  | 100   |
| scaffold00461 | 1      | 25305  | 25305 | 14.66 | C_unshiu_00204 | 117779 | 143039 | 25261 | 7.59  | 99.75 |
| scaffold00461 | 24413  | 94898  | 70486 | 40.85 | C_unshiu_00204 | 144327 | 214764 | 70438 | 21.17 | 99.67 |
| scaffold00461 | 91305  | 133607 | 42303 | 24.51 | C_unshiu_00564 | 79704  | 121998 | 42295 | 24.19 | 99.96 |
| scaffold00461 | 133602 | 136421 | 2820  | 1.63  | C_unshiu_00016 | 87711  | 84892  | 2820  | 0.32  | 100   |
| scaffold00461 | 139212 | 141888 | 2677  | 1.55  | C_unshiu_00564 | 127405 | 130078 | 2674  | 1.53  | 99.55 |
| scaffold00461 | 142004 | 150401 | 8398  | 4.87  | C_unshiu_00564 | 130664 | 139061 | 8398  | 4.8   | 100   |
| scaffold00461 | 151813 | 172560 | 20748 | 12.02 | C_unshiu_00564 | 139962 | 160661 | 20700 | 11.84 | 99.68 |
| scaffold00462 | 7211   | 52215  | 45005 | 26.09 | C_unshiu_01083 | 92596  | 47775  | 44822 | 45.93 | 99.38 |
| scaffold00462 | 57999  | 72333  | 14335 | 8.31  | C_unshiu_01083 | 39290  | 24911  | 14380 | 14.74 | 99.32 |
| scaffold00462 | 76829  | 80032  | 3204  | 1.86  | C_unshiu_01083 | 24920  | 21712  | 3209  | 3.29  | 99.66 |
| scaffold00462 | 80028  | 84380  | 4353  | 2.52  | C_unshiu_00732 | 57353  | 61705  | 4353  | 3.14  | 100   |
| scaffold00462 | 84381  | 85949  | 1569  | 0.91  | C_unshiu_01083 | 17935  | 16367  | 1569  | 1.61  | 99.55 |
| scaffold00462 | 88323  | 90940  | 2618  | 1.52  | C_unshiu_02083 | 37244  | 34637  | 2608  | 7     | 98.86 |
| scaffold00462 | 90966  | 97638  | 6673  | 3.87  | C_unshiu_02083 | 34376  | 27695  | 6682  | 17.94 | 99.61 |
| scaffold00462 | 98696  | 119386 | 20691 | 11.99 | C_unshiu_02083 | 26494  | 5812   | 20683 | 55.53 | 99.47 |
| scaffold00462 | 124855 | 143003 | 18149 | 10.52 | C_unshiu_00189 | 1217   | 19362  | 18146 | 5.27  | 99.55 |
| scaffold00462 | 142989 | 159921 | 16933 | 9.82  | C_unshiu_00189 | 20467  | 37393  | 16927 | 4.91  | 98.82 |
| scaffold00462 | 160166 | 162197 | 2032  | 1.18  | C_unshiu_00189 | 37806  | 39839  | 2034  | 0.59  | 99.75 |
| scaffold00462 | 165444 | 169888 | 4445  | 2.58  | C_unshiu_00189 | 39839  | 44293  | 4455  | 1.29  | 99.66 |
| scaffold00464 | 2254   | 6668   | 4415  | 2.59  | C_unshiu_00064 | 541327 | 536911 | 4417  | 0.79  | 99.25 |
| scaffold00464 | 6692   | 9386   | 2695  | 1.58  | C_unshiu_00064 | 536528 | 533827 | 2702  | 0.48  | 98.56 |
| scaffold00464 | 9384   | 10998  | 1615  | 0.95  | C_unshiu_00080 | 280970 | 282584 | 1615  | 0.33  | 100   |
| scaffold00464 | 11331  | 19725  | 8395  | 4.92  | C_unshiu_00064 | 532884 | 524493 | 8392  | 1.5   | 99.65 |
| scaffold00464 | 24006  | 25903  | 1898  | 1.11  | C_unshiu_00064 | 521535 | 519646 | 1890  | 0.34  | 98.42 |
| scaffold00464 | 38295  | 39905  | 1611  | 0.94  | C_unshiu_01349 | 53323  | 51711  | 1613  | 2.18  | 98.7  |
| scaffold00464 | 49068  | 50778  | 1711  | 1     | C_unshiu_00175 | 275212 | 276922 | 1711  | 0.47  | 100   |
| scaffold00464 | 78433  | 96746  | 18314 | 10.72 | C_unshiu_00740 | 4485   | 22815  | 18331 | 13.34 | 99.6  |
| scaffold00464 | 143378 | 147044 | 3667  | 2.15  | C_unshiu_01119 | 36221  | 39884  | 3664  | 3.9   | 98.75 |
| scaffold00464 | 155629 | 170769 | 15141 | 8.87  | C_unshiu_00050 | 53279  | 68422  | 15144 | 2.51  | 99.95 |
| scaffold00465 | 1      | 2036   | 2036  | 1.2   | C_unshiu_00438 | 2159   | 4191   | 2033  | 0.96  | 98.58 |
| scaffold00465 | 3428   | 27014  | 23587 | 13.87 | C_unshiu_00438 | 7636   | 31221  | 23586 | 11.1  | 99.57 |
| scaffold00465 | 27731  | 29141  | 1411  | 0.83  | C_unshiu_00438 | 31845  | 33257  | 1413  | 0.67  | 99.22 |
| scaffold00465 | 30996  | 32240  | 1245  | 0.73  | C_unshiu_00438 | 35223  | 36467  | 1245  | 0.59  | 100   |
| scaffold00465 | 32241  | 36521  | 4281  | 2.52  | C_unshiu_00144 | 245431 | 249711 | 4281  | 1.08  | 100   |
| scaffold00465 | 32241  | 36523  | 4283  | 2.52  | C_unshiu_00212 | 73251  | 68969  | 4283  | 1.31  | 99.98 |
| scaffold00465 | 36527  | 43571  | 7045  | 4.14  | C_unshiu_00438 | 40129  | 47167  | 7039  | 3.31  | 99.86 |
| scaffold00465 | 75440  | 78055  | 2616  | 1.54  | C_unshiu_00544 | 6      | 2618   | 2613  | 1.46  | 99.81 |
| scaffold00465 | 78091  | 83264  | 5174  | 3.04  | C_unshiu_00544 | 3120   | 8289   | 5170  | 2.88  | 99.81 |
| scaffold00465 | 83580  | 98568  | 14989 | 8.82  | C_unshiu_00544 | 6805   | 21777  | 14973 | 8.35  | 98.73 |
| scaffold00465 | 98439  | 133150 | 34712 | 20.42 | C_unshiu_00943 | 34772  | 61     | 34712 | 30.97 | 99.99 |
| scaffold00465 | 142366 | 147197 | 4832  | 2.84  | C_unshiu_01007 | 98671  | 103495 | 4825  | 4.59  | 99.63 |
| scaffold00465 | 148041 | 160428 | 12388 | 7.29  | C_unshiu_01007 | 76049  | 88432  | 12384 | 11.79 | 99.6  |
| scaffold00465 | 161542 | 169051 | 7510  | 4.42  | C_unshiu_01007 | 90075  | 97589  | 7515  | 7.15  | 99.24 |
| scaffold00467 | 1677   | 5912   | 4236  | 2.5   | C_unshiu_00664 | 127485 | 123248 | 4238  | 2.76  | 99.58 |
| scaffold00467 | 12762  | 14699  | 1938  | 1.14  | C_unshiu_01694 | 20573  | 18642  | 1932  | 3.67  | 98.3  |
| scaffold00467 | 56739  | 60012  | 3274  | 1.93  | C_unshiu_00741 | 96039  | 92767  | 3273  | 2.38  | 98.54 |
| scaffold00467 | 61204  | 80874  | 19671 | 11.6  | C_unshiu_01694 | 52708  | 33027  | 19682 | 37.34 | 99.78 |
| scaffold00467 | 81116  | 82834  | 1719  | 1.01  | C_unshiu_01694 | 32428  | 30710  | 1719  | 3.26  | 98.49 |
| scaffold00467 | 82935  | 84591  | 1657  | 0.98  | C_unshiu_02101 | 8284   | 9940   | 1657  | 4.55  | 98.37 |
| scaffold00467 | 85305  | 92601  | 7297  | 4.3   | C_unshiu_01694 | 27701  | 20368  | 7334  | 13.91 | 99.44 |
| scaffold00467 | 93761  | 99746  | 5986  | 3.53  | C_unshiu_01694 | 18711  | 12719  | 5993  | 11.37 | 99.77 |
| scaffold00467 | 100004 | 104926 | 4923  | 2.9   | C_unshiu_01694 | 12064  | 7199   | 4866  | 9.23  | 98.44 |
| scaffold00467 | 108931 | 113371 | 4441  | 2.62  | C_unshiu_01553 | 55472  | 59902  | 4431  | 7.33  | 98.68 |
| scaffold00467 | 119689 | 121025 | 1337  | 0.79  | C_unshiu_01037 | 72775  | 71439  | 1337  | 1.3   | 100   |
| scaffold00467 | 125431 | 128979 | 3549  | 2.09  | C_unshiu_02760 | 5583   | 9118   | 3536  | 18.71 | 99.58 |
| scaffold00467 | 138470 | 142714 | 4245  | 2.5   | C_unshiu_02760 | 9563   | 13788  | 4226  | 22.37 | 99.04 |
| scaffold00467 | 147783 | 150622 | 2840  | 1.67  | C_unshiu_00290 | 57819  | 60648  | 2830  | 1.05  | 98.01 |
| scaffold00467 | 152903 | 154318 | 1416  | 0.84  | C_unshiu_00290 | 55737  | 57138  | 1402  | 0.52  | 98.09 |
| scaffold00467 | 158760 | 160234 | 1475  | 0.87  | C_unshiu_01553 | 16782  | 18256  | 1475  | 2.44  | 99.59 |
| scaffold00467 | 160344 | 161533 | 1190  | 0.7   | C_unshiu_01553 | 18438  | 19627  | 1190  | 1.97  | 100   |
| scaffold00467 | 166093 | 168646 | 2554  | 1.51  | C_unshiu_01553 | 23303  | 25856  | 2554  | 4.23  | 99.92 |
| scaffold00468 | 4047   | 5226   | 1180  | 0.7   | C_unshiu_00222 | 177743 | 176555 | 1189  | 0.38  | 98.32 |
| scaffold00468 | 5205   | 6285   | 1081  | 0.64  | C_unshiu_00222 | 176527 | 175444 | 1084  | 0.35  | 99.63 |
| scaffold00468 | 12611  | 14822  | 2212  | 1.31  | C_unshiu_00222 | 169266 | 167051 | 2216  | 0.71  | 98.65 |
| scaffold00468 | 15023  | 30657  | 15635 | 9.26  | C_unshiu_00222 | 166581 | 150969 | 15613 | 4.97  | 98.82 |
| scaffold00468 | 30649  | 38896  | 8248  | 4.89  | C_unshiu_00222 | 150839 | 142568 | 8272  | 2.63  | 99.46 |
| scaffold00468 | 39209  | 42332  | 3124  | 1.85  | C_unshiu_00222 | 141798 | 138668 | 3131  | 1     | 98.18 |
| scaffold00468 | 44414  | 45722  | 1309  | 0.78  | C_unshiu_00222 | 141819 | 140509 | 1311  | 0.42  | 99.69 |
| scaffold00468 | 49733  | 53878  | 4146  | 2.46  | C_unshiu_00222 | 133451 | 129263 | 4189  | 1.33  | 98.14 |
| scaffold00468 | 60937  | 75514  | 14578 | 8.64  | C_unshiu_00222 | 129270 | 114650 | 14621 | 4.66  | 98.95 |
| scaffold00468 | 77400  | 79304  | 1905  | 1.13  | C_unshiu_00222 | 112377 | 110469 | 1909  | 0.61  | 98.27 |
| scaffold00468 | 80213  | 86335  | 6123  | 3.63  | C_unshiu_00222 | 109298 | 103173 | 6126  | 1.95  | 99.43 |
| scaffold00468 | 86445  | 90190  | 3746  | 2.22  | C_unshiu_00222 | 102596 | 98855  | 3742  | 1.19  | 98.09 |
| scaffold00468 | 94669  | 107407 | 12739 | 7.55  | C_unshiu_00286 | 12787  | 1      | 12787 | 4.67  | 98.94 |
| scaffold00468 | 110542 | 115524 | 4983  | 2.95  | C_unshiu_00222 | 98509  | 93534  | 4976  | 1.58  | 99.5  |
| scaffold00468 | 127731 | 128868 | 1138  | 0.67  | C_unshiu_00677 | 109375 | 110496 | 1122  | 0.75  | 98.42 |
| scaffold00468 | 129258 | 149591 | 20334 | 12.05 | C_unshiu_00677 | 110539 | 130910 | 20372 | 13.66 | 99.08 |
| scaffold00468 | 146074 | 160375 | 14302 | 8.47  | C_unshiu_01023 | 103541 | 89246  | 14296 | 13.81 | 99.05 |

|               |        |        |       |       |                |        |        |       |       |       |
|---------------|--------|--------|-------|-------|----------------|--------|--------|-------|-------|-------|
| scaffold00468 | 161112 | 162268 | 1157  | 0.69  | C_unshiu_01023 | 85747  | 84591  | 1157  | 1.12  | 99.31 |
| scaffold00469 | 4746   | 31708  | 26963 | 16.02 | C_unshiu_00733 | 55517  | 82490  | 26974 | 19.48 | 99.76 |
| scaffold00469 | 32614  | 81935  | 49322 | 29.31 | C_unshiu_00196 | 339020 | 289675 | 49346 | 14.54 | 99.81 |
| scaffold00469 | 81995  | 83765  | 1771  | 1.05  | C_unshiu_00196 | 289410 | 287639 | 1772  | 0.52  | 99.89 |
| scaffold00469 | 84385  | 90658  | 6274  | 3.73  | C_unshiu_00196 | 286572 | 280295 | 6278  | 1.85  | 99.17 |
| scaffold00469 | 92261  | 106128 | 13868 | 8.24  | C_unshiu_00196 | 278269 | 264353 | 13917 | 4.1   | 99.58 |
| scaffold00469 | 107273 | 114687 | 7415  | 4.41  | C_unshiu_00196 | 262736 | 255321 | 7416  | 2.19  | 99.97 |
| scaffold00469 | 118110 | 128687 | 10578 | 6.29  | C_unshiu_00196 | 252032 | 241453 | 10580 | 3.12  | 99.93 |
| scaffold00469 | 128092 | 160238 | 32147 | 19.1  | C_unshiu_00196 | 240713 | 208570 | 32144 | 9.47  | 99.9  |
| scaffold00469 | 160237 | 161769 | 1533  | 0.91  | C_unshiu_00196 | 203531 | 205061 | 1531  | 0.45  | 99.8  |
| scaffold00469 | 166871 | 168281 | 1411  | 0.84  | C_unshiu_01622 | 23095  | 24503  | 1409  | 2.49  | 99.08 |
| scaffold00470 | 1      | 1792   | 1792  | 1.07  | C_unshiu_02076 | 3695   | 5487   | 1793  | 4.79  | 99.94 |
| scaffold00470 | 20404  | 23900  | 3497  | 2.08  | C_unshiu_00036 | 356218 | 352718 | 3501  | 0.51  | 98.2  |
| scaffold00470 | 27739  | 32249  | 4511  | 2.68  | C_unshiu_02530 | 3058   | 7566   | 4509  | 18.9  | 98.69 |
| scaffold00470 | 28711  | 60893  | 32183 | 19.14 | C_unshiu_00036 | 352718 | 320548 | 32171 | 4.71  | 98.45 |
| scaffold00470 | 59972  | 62588  | 2617  | 1.56  | C_unshiu_01265 | 6224   | 8846   | 2623  | 3.29  | 98.44 |
| scaffold00470 | 75599  | 76972  | 1374  | 0.82  | C_unshiu_00036 | 300802 | 299429 | 1374  | 0.2   | 98.76 |
| scaffold00470 | 89533  | 90636  | 1104  | 0.66  | C_unshiu_00017 | 212697 | 211594 | 1104  | 0.13  | 99.82 |
| scaffold00470 | 91355  | 125566 | 34212 | 20.34 | C_unshiu_00017 | 211251 | 177038 | 34214 | 4.01  | 99.8  |
| scaffold00470 | 125384 | 130953 | 5570  | 3.31  | C_unshiu_02130 | 23525  | 29085  | 5561  | 15.63 | 98.69 |
| scaffold00470 | 129082 | 138274 | 9193  | 5.47  | C_unshiu_02856 | 10926  | 1737   | 9190  | 55.27 | 99.86 |
| scaffold00470 | 147032 | 159773 | 12742 | 7.58  | C_unshiu_00036 | 321041 | 308307 | 12735 | 1.86  | 99.73 |
| scaffold00470 | 163697 | 165166 | 1470  | 0.87  | C_unshiu_00036 | 305321 | 303851 | 1471  | 0.22  | 99.52 |
| scaffold00470 | 165237 | 167105 | 1869  | 1.11  | C_unshiu_00715 | 125843 | 127711 | 1869  | 1.32  | 100   |
| scaffold00470 | 167106 | 168162 | 1057  | 0.63  | C_unshiu_02130 | 5184   | 6240   | 1057  | 2.97  | 100   |
| scaffold00471 | 1      | 1998   | 1998  | 1.19  | C_unshiu_02506 | 2004   | 1      | 2004  | 8.18  | 98    |
| scaffold00471 | 11081  | 40563  | 29483 | 17.54 | C_unshiu_00887 | 72672  | 43161  | 29512 | 24.86 | 98.7  |
| scaffold00471 | 44126  | 50625  | 6500  | 3.87  | C_unshiu_00887 | 42371  | 35875  | 6497  | 5.47  | 98.86 |
| scaffold00471 | 75635  | 79199  | 3565  | 2.12  | C_unshiu_00887 | 12310  | 15874  | 3565  | 3     | 100   |
| scaffold00471 | 80461  | 81973  | 1513  | 0.9   | C_unshiu_00887 | 17476  | 18988  | 1513  | 1.27  | 100   |
| scaffold00471 | 84802  | 89660  | 4859  | 2.89  | C_unshiu_00682 | 148450 | 143600 | 4851  | 3.27  | 99.26 |
| scaffold00471 | 109587 | 111468 | 1882  | 1.12  | C_unshiu_00682 | 125965 | 124084 | 1882  | 1.27  | 100   |
| scaffold00471 | 118249 | 125897 | 7649  | 4.55  | C_unshiu_00682 | 121004 | 113341 | 7664  | 5.16  | 98.61 |
| scaffold00471 | 125896 | 136788 | 10893 | 6.48  | C_unshiu_00682 | 113377 | 102467 | 10911 | 7.35  | 98.73 |
| scaffold00471 | 165487 | 166811 | 1325  | 0.79  | C_unshiu_00682 | 80375  | 79051  | 1325  | 0.89  | 99.77 |
| scaffold00472 | 1      | 24057  | 24057 | 14.43 | C_unshiu_00379 | 113122 | 137180 | 24059 | 10.44 | 99.78 |
| scaffold00472 | 24058  | 28501  | 4444  | 2.66  | C_unshiu_01017 | 32396  | 36839  | 4444  | 4.26  | 100   |
| scaffold00472 | 34741  | 38095  | 3355  | 2.01  | C_unshiu_00234 | 54430  | 57784  | 3355  | 1.1   | 100   |
| scaffold00472 | 34834  | 58460  | 23627 | 14.17 | C_unshiu_00234 | 54435  | 30761  | 23675 | 7.75  | 98.82 |
| scaffold00472 | 56973  | 62700  | 5728  | 3.43  | C_unshiu_00564 | 160319 | 166052 | 5734  | 3.28  | 99.44 |
| scaffold00472 | 63147  | 69759  | 6613  | 3.97  | C_unshiu_00234 | 31729  | 25117  | 6613  | 2.16  | 99.98 |
| scaffold00472 | 74795  | 89524  | 14730 | 8.83  | C_unshiu_00234 | 16557  | 1826   | 14732 | 4.82  | 99.95 |
| scaffold00472 | 88331  | 147364 | 59034 | 35.4  | C_unshiu_00636 | 70234  | 129252 | 59019 | 36.94 | 99.96 |
| scaffold00472 | 147386 | 166758 | 19373 | 11.62 | C_unshiu_00636 | 130110 | 149457 | 19348 | 12.11 | 99.4  |
| scaffold00473 | 1      | 18665  | 18665 | 11.19 | C_unshiu_00996 | 87944  | 106616 | 18673 | 17.51 | 99.62 |
| scaffold00473 | 16306  | 21816  | 5511  | 3.31  | C_unshiu_02648 | 12146  | 6642   | 5505  | 26.36 | 98.6  |
| scaffold00473 | 25044  | 27365  | 2322  | 1.39  | C_unshiu_01251 | 12617  | 14938  | 2322  | 2.87  | 100   |
| scaffold00473 | 29691  | 37491  | 7801  | 4.68  | C_unshiu_01251 | 15969  | 23742  | 7774  | 9.61  | 98.59 |
| scaffold00473 | 42127  | 44432  | 2306  | 1.38  | C_unshiu_00996 | 7036   | 9341   | 2306  | 2.16  | 100   |
| scaffold00473 | 44697  | 46870  | 2174  | 1.3   | C_unshiu_00996 | 10028  | 12201  | 2174  | 2.04  | 99.86 |
| scaffold00473 | 52122  | 57161  | 5040  | 3.02  | C_unshiu_01251 | 23771  | 28809  | 5039  | 6.23  | 99.05 |
| scaffold00473 | 57177  | 74475  | 17299 | 10.38 | C_unshiu_00996 | 28158  | 45439  | 17282 | 16.21 | 99.46 |
| scaffold00473 | 102352 | 109531 | 7180  | 4.31  | C_unshiu_01074 | 77976  | 70790  | 7187  | 7.29  | 99.35 |
| scaffold00473 | 113482 | 116916 | 3435  | 2.06  | C_unshiu_01074 | 68058  | 64617  | 3442  | 3.49  | 98.84 |
| scaffold00473 | 120584 | 146831 | 26248 | 15.74 | C_unshiu_00549 | 169115 | 142839 | 26277 | 14.7  | 99.5  |
| scaffold00473 | 153813 | 166728 | 12916 | 7.75  | C_unshiu_01074 | 39233  | 26311  | 12923 | 13.12 | 99.84 |
| scaffold00474 | 9992   | 11326  | 1335  | 0.8   | C_unshiu_00264 | 38498  | 39832  | 1335  | 0.47  | 100   |
| scaffold00474 | 19687  | 31703  | 12017 | 7.21  | C_unshiu_00816 | 14292  | 26308  | 12017 | 9.47  | 99.99 |
| scaffold00474 | 32628  | 39149  | 6522  | 3.91  | C_unshiu_00816 | 28798  | 35318  | 6521  | 5.14  | 99.06 |
| scaffold00474 | 44524  | 53677  | 9154  | 5.49  | C_unshiu_00816 | 34176  | 43341  | 9166  | 7.22  | 99.14 |
| scaffold00474 | 55190  | 78224  | 23035 | 13.81 | C_unshiu_00816 | 45159  | 68193  | 23035 | 18.15 | 99.98 |
| scaffold00474 | 78871  | 80085  | 1215  | 0.73  | C_unshiu_00816 | 69169  | 70383  | 1215  | 0.96  | 99.92 |
| scaffold00474 | 94330  | 146151 | 51822 | 31.08 | C_unshiu_00128 | 408980 | 357209 | 51772 | 12.53 | 99.78 |
| scaffold00474 | 148195 | 150265 | 2071  | 1.24  | C_unshiu_00796 | 105273 | 103211 | 2063  | 1.6   | 99.52 |
| scaffold00475 | 1288   | 3293   | 2006  | 1.2   | C_unshiu_01897 | 8444   | 6434   | 2011  | 4.49  | 99.01 |
| scaffold00475 | 3760   | 5534   | 1775  | 1.06  | C_unshiu_02275 | 24199  | 22426  | 1774  | 5.81  | 99.61 |
| scaffold00475 | 28666  | 31367  | 2702  | 1.62  | C_unshiu_01011 | 82125  | 79421  | 2705  | 2.58  | 99    |
| scaffold00475 | 38952  | 41947  | 2996  | 1.8   | C_unshiu_01011 | 40337  | 37333  | 3005  | 2.87  | 98.27 |
| scaffold00475 | 48976  | 56353  | 7378  | 4.43  | C_unshiu_01011 | 68595  | 61216  | 7380  | 7.04  | 99.84 |
| scaffold00475 | 59819  | 62987  | 3169  | 1.9   | C_unshiu_01011 | 28312  | 25163  | 3150  | 3.01  | 98.99 |
| scaffold00475 | 69235  | 76957  | 7723  | 4.63  | C_unshiu_01011 | 20623  | 12922  | 7702  | 7.35  | 99.44 |
| scaffold00475 | 86359  | 87576  | 1218  | 0.73  | C_unshiu_01011 | 2328   | 1111   | 1218  | 1.16  | 100   |
| scaffold00475 | 88329  | 94518  | 6190  | 3.71  | C_unshiu_01011 | 49727  | 43545  | 6183  | 5.9   | 98.9  |
| scaffold00475 | 103141 | 104685 | 1545  | 0.93  | C_unshiu_01011 | 36696  | 35149  | 1548  | 1.48  | 99.55 |
| scaffold00475 | 106514 | 108627 | 2114  | 1.27  | C_unshiu_01011 | 32525  | 30412  | 2114  | 2.02  | 99.81 |
| scaffold00475 | 116366 | 139103 | 22738 | 13.64 | C_unshiu_01193 | 10607  | 33378  | 22772 | 26.39 | 99.64 |
| scaffold00475 | 134977 | 164353 | 29377 | 17.62 | C_unshiu_01412 | 29023  | 58382  | 29360 | 41.94 | 98.73 |
| scaffold00477 | 1203   | 4446   | 3244  | 1.95  | C_unshiu_00749 | 125844 | 122595 | 3250  | 2.38  | 99.39 |
| scaffold00477 | 16601  | 24944  | 8344  | 5.02  | C_unshiu_00590 | 58465  | 66847  | 8383  | 4.94  | 98.43 |

|               |        |        |       |       |                |        |        |       |       |       |
|---------------|--------|--------|-------|-------|----------------|--------|--------|-------|-------|-------|
| scaffold00477 | 25025  | 32116  | 7092  | 4.27  | C_unshiu_00590 | 66940  | 74063  | 7124  | 4.2   | 98.22 |
| scaffold00477 | 34184  | 35611  | 1428  | 0.86  | C_unshiu_00590 | 76546  | 77976  | 1431  | 0.84  | 99.79 |
| scaffold00477 | 42913  | 44397  | 1485  | 0.89  | C_unshiu_00590 | 85574  | 87067  | 1494  | 0.88  | 99    |
| scaffold00477 | 44652  | 46886  | 2235  | 1.35  | C_unshiu_00590 | 87306  | 89539  | 2234  | 1.32  | 99.46 |
| scaffold00477 | 46888  | 51779  | 4892  | 2.94  | C_unshiu_00590 | 89870  | 94770  | 4901  | 2.89  | 99.45 |
| scaffold00477 | 59939  | 66857  | 6919  | 4.16  | C_unshiu_00590 | 99776  | 106741 | 6966  | 4.1   | 98.58 |
| scaffold00477 | 66860  | 76696  | 9837  | 5.92  | C_unshiu_00590 | 106664 | 116501 | 9838  | 5.8   | 99.44 |
| scaffold00477 | 98200  | 100056 | 1857  | 1.12  | C_unshiu_01365 | 46151  | 44295  | 1857  | 2.53  | 100   |
| scaffold00477 | 100689 | 119499 | 18811 | 11.32 | C_unshiu_02475 | 22010  | 3248   | 18763 | 73.81 | 99.67 |
| scaffold00477 | 122792 | 125951 | 3160  | 1.9   | C_unshiu_02475 | 3160   | 1      | 3160  | 12.43 | 100   |
| scaffold00477 | 133250 | 158286 | 25037 | 15.07 | C_unshiu_00743 | 84655  | 59620  | 25036 | 18.24 | 99.99 |
| scaffold00477 | 154106 | 166128 | 12023 | 7.24  | C_unshiu_00976 | 1      | 12023  | 12023 | 11.04 | 99.93 |
| scaffold00479 | 1      | 1338   | 1338  | 0.81  | C_unshiu_00119 | 38306  | 36969  | 1338  | 0.31  | 99.48 |
| scaffold00479 | 2225   | 12698  | 10474 | 6.32  | C_unshiu_02999 | 11752  | 1279   | 10474 | 80.8  | 99.81 |
| scaffold00479 | 12693  | 15864  | 3172  | 1.91  | C_unshiu_00399 | 26976  | 23805  | 3172  | 1.42  | 100   |
| scaffold00479 | 19355  | 29085  | 9731  | 5.87  | C_unshiu_01565 | 809    | 10528  | 9720  | 16.36 | 99.82 |
| scaffold00479 | 29099  | 30698  | 1600  | 0.97  | C_unshiu_01565 | 12035  | 13635  | 1601  | 2.7   | 99.94 |
| scaffold00479 | 30723  | 43583  | 12861 | 7.76  | C_unshiu_00432 | 170281 | 183130 | 12850 | 6     | 98.67 |
| scaffold00479 | 44399  | 53438  | 9040  | 5.46  | C_unshiu_00432 | 184464 | 193496 | 9033  | 4.22  | 99.17 |
| scaffold00479 | 52340  | 61680  | 9341  | 5.64  | C_unshiu_01565 | 33211  | 42551  | 9341  | 15.73 | 99.71 |
| scaffold00479 | 62481  | 76530  | 14050 | 8.48  | C_unshiu_00432 | 199953 | 213999 | 14047 | 6.56  | 99.55 |
| scaffold00479 | 73418  | 81302  | 7885  | 4.76  | C_unshiu_02176 | 13730  | 21616  | 7887  | 23.1  | 98.76 |
| scaffold00479 | 90687  | 97385  | 6699  | 4.04  | C_unshiu_02176 | 27452  | 34150  | 6699  | 19.62 | 99.73 |
| scaffold00479 | 107965 | 113330 | 5366  | 3.24  | C_unshiu_01735 | 6574   | 11986  | 5413  | 10.57 | 98.1  |
| scaffold00479 | 122715 | 145130 | 22416 | 13.53 | C_unshiu_01735 | 21576  | 44049  | 22474 | 43.87 | 98.47 |
| scaffold00479 | 149356 | 152069 | 2714  | 1.64  | C_unshiu_01735 | 47856  | 50564  | 2709  | 5.29  | 99.63 |
| scaffold00480 | 1      | 11834  | 11834 | 7.15  | C_unshiu_01172 | 20629  | 32478  | 11850 | 13.43 | 99.26 |
| scaffold00480 | 11918  | 22461  | 10544 | 6.37  | C_unshiu_01172 | 32990  | 43568  | 10579 | 11.99 | 98.26 |
| scaffold00480 | 22896  | 26757  | 3862  | 2.33  | C_unshiu_01172 | 44487  | 48358  | 3872  | 4.39  | 98.12 |
| scaffold00480 | 29480  | 46874  | 17395 | 10.52 | C_unshiu_01172 | 48531  | 65898  | 17368 | 19.68 | 98.93 |
| scaffold00480 | 53069  | 54963  | 1895  | 1.15  | C_unshiu_01172 | 68307  | 70201  | 1895  | 2.15  | 98.36 |
| scaffold00480 | 54964  | 56777  | 1814  | 1.1   | C_unshiu_00612 | 131773 | 129961 | 1813  | 1.1   | 99.94 |
| scaffold00480 | 67632  | 75153  | 7522  | 4.55  | C_unshiu_00873 | 120018 | 112497 | 7522  | 6.27  | 99.6  |
| scaffold00480 | 75153  | 76366  | 1214  | 0.73  | C_unshiu_01172 | 75706  | 76919  | 1214  | 1.38  | 100   |
| scaffold00480 | 77839  | 80501  | 2663  | 1.61  | C_unshiu_01172 | 76809  | 79474  | 2666  | 3.02  | 99.44 |
| scaffold00480 | 80501  | 82283  | 1783  | 1.08  | C_unshiu_00873 | 111946 | 110165 | 1782  | 1.48  | 99.05 |
| scaffold00480 | 82278  | 84533  | 2256  | 1.36  | C_unshiu_00873 | 100573 | 98318  | 2256  | 1.88  | 99.56 |
| scaffold00480 | 111555 | 120108 | 8554  | 5.17  | C_unshiu_00873 | 78406  | 69853  | 8554  | 7.13  | 98.74 |
| scaffold00480 | 119418 | 123765 | 4348  | 2.63  | C_unshiu_00873 | 69808  | 65460  | 4349  | 3.62  | 98.09 |
| scaffold00480 | 149189 | 158544 | 9356  | 5.66  | C_unshiu_01747 | 1      | 9355   | 9355  | 18.47 | 99.83 |
| scaffold00480 | 158526 | 163199 | 4674  | 2.83  | C_unshiu_01747 | 9437   | 14112  | 4676  | 9.23  | 99.96 |
| scaffold00481 | 233    | 3489   | 3257  | 1.98  | C_unshiu_01646 | 19919  | 23175  | 3257  | 5.88  | 100   |
| scaffold00481 | 238    | 6554   | 6317  | 3.84  | C_unshiu_01946 | 25197  | 18881  | 6317  | 14.72 | 100   |
| scaffold00481 | 13668  | 15259  | 1592  | 0.97  | C_unshiu_00625 | 64290  | 65881  | 1592  | 0.98  | 100   |
| scaffold00481 | 47510  | 55213  | 7704  | 4.69  | C_unshiu_00232 | 255242 | 247527 | 7716  | 2.52  | 98.65 |
| scaffold00481 | 65881  | 75041  | 9161  | 5.57  | C_unshiu_00232 | 238111 | 228947 | 9165  | 2.99  | 99.26 |
| scaffold00481 | 75573  | 77142  | 1570  | 0.96  | C_unshiu_01655 | 35851  | 37419  | 1569  | 2.85  | 98.92 |
| scaffold00481 | 113063 | 119000 | 5938  | 3.61  | C_unshiu_00232 | 193163 | 187226 | 5938  | 1.94  | 100   |
| scaffold00481 | 127276 | 129595 | 2320  | 1.41  | C_unshiu_00232 | 179524 | 177199 | 2326  | 0.76  | 98.58 |
| scaffold00481 | 129602 | 155588 | 25987 | 15.81 | C_unshiu_02251 | 28596  | 2622   | 25975 | 81.84 | 99.52 |
| scaffold00483 | 1      | 10642  | 10642 | 6.49  | C_unshiu_00819 | 67631  | 57084  | 10548 | 8.33  | 98.22 |
| scaffold00483 | 12323  | 35074  | 22752 | 13.88 | C_unshiu_00819 | 56555  | 33802  | 22754 | 17.98 | 99.95 |
| scaffold00483 | 45963  | 57867  | 11905 | 7.26  | C_unshiu_00880 | 3604   | 15510  | 11907 | 9.99  | 99.35 |
| scaffold00483 | 59489  | 112054 | 52566 | 32.07 | C_unshiu_00880 | 15842  | 68387  | 52546 | 44.07 | 99.77 |
| scaffold00483 | 112831 | 140248 | 27418 | 16.73 | C_unshiu_00880 | 69672  | 97107  | 27436 | 23.01 | 99.85 |
| scaffold00483 | 141228 | 156832 | 15605 | 9.52  | C_unshiu_00880 | 98299  | 113903 | 15605 | 13.09 | 99.99 |
| scaffold00485 | 1086   | 76320  | 75235 | 46.28 | C_unshiu_00540 | 175934 | 100715 | 75220 | 41.59 | 99.96 |
| scaffold00485 | 76726  | 80817  | 4092  | 2.52  | C_unshiu_00540 | 99073  | 94983  | 4091  | 2.26  | 99.98 |
| scaffold00485 | 85423  | 89986  | 4564  | 2.81  | C_unshiu_00540 | 90969  | 86417  | 4553  | 2.52  | 99.39 |
| scaffold00485 | 94374  | 103959 | 9586  | 5.9   | C_unshiu_00540 | 82699  | 73114  | 9586  | 5.3   | 99.97 |
| scaffold00485 | 103527 | 108352 | 4826  | 2.97  | C_unshiu_00540 | 68739  | 63913  | 4827  | 2.67  | 99.98 |
| scaffold00485 | 108351 | 114108 | 5758  | 3.54  | C_unshiu_00540 | 64047  | 58288  | 5760  | 3.18  | 99.88 |
| scaffold00485 | 114441 | 162023 | 47583 | 29.27 | C_unshiu_00540 | 57409  | 9820   | 47590 | 26.31 | 99.91 |
| scaffold00486 | 27372  | 31382  | 4011  | 2.47  | C_unshiu_02968 | 13811  | 9817   | 3995  | 28.89 | 99.58 |
| scaffold00486 | 31770  | 32849  | 1080  | 0.67  | C_unshiu_02968 | 6763   | 5684   | 1080  | 7.81  | 99.72 |
| scaffold00486 | 32919  | 34712  | 1794  | 1.1   | C_unshiu_02968 | 8479   | 6688   | 1792  | 12.96 | 99.83 |
| scaffold00486 | 36223  | 37683  | 1461  | 0.9   | C_unshiu_02968 | 4340   | 2880   | 1461  | 10.57 | 99.93 |
| scaffold00486 | 38871  | 46312  | 7442  | 4.58  | C_unshiu_01547 | 53747  | 46325  | 7423  | 12.22 | 99.49 |
| scaffold00486 | 46307  | 51140  | 4834  | 2.98  | C_unshiu_01348 | 51747  | 46914  | 4834  | 6.51  | 100   |
| scaffold00486 | 49337  | 51147  | 1811  | 1.12  | C_unshiu_01032 | 91297  | 89487  | 1811  | 1.76  | 100   |
| scaffold00486 | 52072  | 70712  | 18641 | 11.48 | C_unshiu_01623 | 37958  | 56515  | 18558 | 32.84 | 99.42 |
| scaffold00486 | 74454  | 79160  | 4707  | 2.9   | C_unshiu_00724 | 110623 | 115329 | 4707  | 3.36  | 99.94 |
| scaffold00486 | 79161  | 81347  | 2187  | 1.35  | C_unshiu_01837 | 19537  | 17351  | 2187  | 4.65  | 100   |
| scaffold00486 | 81341  | 92746  | 11406 | 7.02  | C_unshiu_00724 | 118022 | 129403 | 11382 | 8.13  | 99.35 |
| scaffold00486 | 97253  | 99569  | 2317  | 1.43  | C_unshiu_00724 | 133116 | 135430 | 2315  | 1.65  | 99.4  |
| scaffold00486 | 104105 | 139636 | 35532 | 21.88 | C_unshiu_00480 | 101784 | 66316  | 35469 | 17.92 | 99.72 |
| scaffold00487 | 721    | 2249   | 1529  | 0.94  | C_unshiu_01076 | 18069  | 16541  | 1529  | 1.56  | 100   |
| scaffold00487 | 2250   | 4167   | 1918  | 1.18  | C_unshiu_01007 | 23776  | 25695  | 1920  | 1.83  | 98.96 |
| scaffold00487 | 4162   | 6316   | 2155  | 1.33  | C_unshiu_00265 | 232619 | 234773 | 2155  | 0.76  | 100   |

|               |        |        |       |       |                |        |        |       |       |       |
|---------------|--------|--------|-------|-------|----------------|--------|--------|-------|-------|-------|
| scaffold00487 | 8817   | 12770  | 3954  | 2.44  | C_unshiu_01076 | 15397  | 11444  | 3954  | 4.03  | 100   |
| scaffold00487 | 16918  | 19116  | 2199  | 1.35  | C_unshiu_01523 | 52633  | 50431  | 2203  | 3.55  | 99.55 |
| scaffold00487 | 20116  | 24432  | 4317  | 2.66  | C_unshiu_01523 | 48094  | 43776  | 4319  | 6.97  | 99.24 |
| scaffold00487 | 24433  | 26440  | 2008  | 1.24  | C_unshiu_01523 | 43053  | 41061  | 1993  | 3.21  | 98.95 |
| scaffold00487 | 29388  | 34123  | 4736  | 2.92  | C_unshiu_01523 | 39342  | 34599  | 4744  | 7.65  | 99.45 |
| scaffold00487 | 34124  | 35241  | 1118  | 0.69  | C_unshiu_01523 | 34636  | 33519  | 1118  | 1.8   | 99.64 |
| scaffold00487 | 76656  | 78765  | 2110  | 1.3   | C_unshiu_01512 | 31906  | 34005  | 2100  | 3.36  | 99.19 |
| scaffold00487 | 97711  | 102396 | 4686  | 2.89  | C_unshiu_01512 | 45161  | 49848  | 4688  | 7.5   | 99.87 |
| scaffold00487 | 105759 | 107328 | 1570  | 0.97  | C_unshiu_01512 | 51814  | 53381  | 1568  | 2.51  | 99.68 |
| scaffold00487 | 107647 | 111557 | 3911  | 2.41  | C_unshiu_00746 | 41236  | 45146  | 3911  | 2.86  | 100   |
| scaffold00487 | 111551 | 113018 | 1468  | 0.9   | C_unshiu_00086 | 448924 | 450392 | 1469  | 0.31  | 99.66 |
| scaffold00487 | 115476 | 116487 | 1012  | 0.62  | C_unshiu_00086 | 446228 | 447232 | 1005  | 0.21  | 98.13 |
| scaffold00487 | 115803 | 117591 | 1789  | 1.1   | C_unshiu_00086 | 451306 | 453095 | 1790  | 0.38  | 99.66 |
| scaffold00487 | 117595 | 119339 | 1745  | 1.07  | C_unshiu_01917 | 16062  | 17808  | 1747  | 3.96  | 99.48 |
| scaffold00487 | 120125 | 124413 | 4289  | 2.64  | C_unshiu_00086 | 455346 | 459654 | 4309  | 0.91  | 98.17 |
| scaffold00487 | 124459 | 126644 | 2186  | 1.35  | C_unshiu_00086 | 460079 | 462274 | 2196  | 0.47  | 99.13 |
| scaffold00487 | 127239 | 129243 | 2005  | 1.23  | C_unshiu_00806 | 126671 | 124667 | 2005  | 1.57  | 100   |
| scaffold00487 | 130082 | 132508 | 2427  | 1.49  | C_unshiu_00806 | 123409 | 120983 | 2427  | 1.9   | 100   |
| scaffold00487 | 132885 | 135480 | 2596  | 1.6   | C_unshiu_00806 | 120430 | 117835 | 2596  | 2.03  | 99.92 |
| scaffold00487 | 135478 | 138686 | 3209  | 1.98  | C_unshiu_00806 | 117630 | 114428 | 3203  | 2.51  | 99.5  |
| scaffold00487 | 138924 | 140307 | 1384  | 0.85  | C_unshiu_00806 | 113779 | 112399 | 1381  | 1.08  | 99.35 |
| scaffold00487 | 143152 | 145468 | 2317  | 1.43  | C_unshiu_00806 | 112593 | 110272 | 2322  | 1.82  | 98.24 |
| scaffold00487 | 146321 | 155167 | 8847  | 5.45  | C_unshiu_00806 | 108793 | 99946  | 8848  | 6.93  | 98.66 |
| scaffold00488 | 1      | 2128   | 2128  | 1.31  | C_unshiu_00552 | 65384  | 63252  | 2133  | 1.2   | 98.97 |
| scaffold00488 | 2121   | 4193   | 2073  | 1.28  | C_unshiu_01520 | 15163  | 17235  | 2073  | 3.33  | 100   |
| scaffold00488 | 9926   | 30968  | 21043 | 12.97 | C_unshiu_00552 | 53649  | 32565  | 21085 | 11.82 | 98.38 |
| scaffold00488 | 35146  | 41933  | 6788  | 4.18  | C_unshiu_00552 | 27847  | 21016  | 6832  | 3.83  | 98.3  |
| scaffold00488 | 42922  | 62269  | 19348 | 11.93 | C_unshiu_01508 | 62720  | 43355  | 19366 | 30.88 | 98.91 |
| scaffold00488 | 62669  | 64634  | 1966  | 1.21  | C_unshiu_00552 | 3456   | 5412   | 1957  | 1.1   | 98.32 |
| scaffold00488 | 70924  | 88067  | 17144 | 10.57 | C_unshiu_00881 | 119164 | 102032 | 17133 | 14.38 | 99.15 |
| scaffold00488 | 88441  | 89791  | 1351  | 0.83  | C_unshiu_02191 | 31036  | 29687  | 1350  | 4.03  | 99.48 |
| scaffold00488 | 121853 | 130424 | 8572  | 5.28  | C_unshiu_00881 | 68831  | 60285  | 8547  | 7.17  | 99.58 |
| scaffold00488 | 132755 | 135446 | 2692  | 1.66  | C_unshiu_00680 | 77634  | 74935  | 2700  | 1.82  | 98.41 |
| scaffold00488 | 137817 | 160877 | 23061 | 14.22 | C_unshiu_00680 | 73845  | 50763  | 23083 | 15.54 | 98.8  |
| scaffold00490 | 13614  | 19758  | 6145  | 3.79  | C_unshiu_03062 | 6141   | 1      | 6141  | 56.38 | 99.64 |
| scaffold00490 | 13797  | 46096  | 32300 | 19.95 | C_unshiu_01171 | 21441  | 53740  | 32300 | 36.57 | 98.61 |
| scaffold00490 | 47406  | 48574  | 1169  | 0.72  | C_unshiu_01171 | 53859  | 55027  | 1169  | 1.32  | 98.89 |
| scaffold00490 | 48717  | 53998  | 5282  | 3.26  | C_unshiu_01171 | 55176  | 60442  | 5267  | 5.96  | 99.6  |
| scaffold00490 | 67714  | 72316  | 4603  | 2.84  | C_unshiu_00819 | 8005   | 12576  | 4572  | 3.61  | 98.18 |
| scaffold00490 | 94499  | 101450 | 6952  | 4.29  | C_unshiu_01718 | 14175  | 21125  | 6951  | 13.4  | 99.81 |
| scaffold00490 | 133260 | 138971 | 5712  | 3.53  | C_unshiu_01102 | 51240  | 45543  | 5698  | 5.94  | 98.39 |
| scaffold00490 | 139454 | 154007 | 14554 | 8.99  | C_unshiu_01102 | 45352  | 30816  | 14537 | 15.15 | 98.86 |
| scaffold00490 | 154690 | 156505 | 1816  | 1.12  | C_unshiu_01102 | 29831  | 28016  | 1816  | 1.89  | 99.94 |
| scaffold00490 | 157621 | 159206 | 1586  | 0.98  | C_unshiu_01102 | 26458  | 24873  | 1586  | 1.65  | 99.81 |
| scaffold00491 | 6994   | 9028   | 2035  | 1.26  | C_unshiu_02590 | 21509  | 19482  | 2028  | 9.04  | 98.87 |
| scaffold00491 | 7868   | 23024  | 15157 | 9.38  | C_unshiu_00737 | 47511  | 62604  | 15094 | 10.93 | 99.35 |
| scaffold00491 | 25480  | 27942  | 2463  | 1.52  | C_unshiu_00737 | 63975  | 66439  | 2465  | 1.79  | 99.19 |
| scaffold00491 | 30316  | 31435  | 1120  | 0.69  | C_unshiu_00806 | 111065 | 109945 | 1121  | 0.88  | 99.64 |
| scaffold00491 | 32029  | 33896  | 1868  | 1.16  | C_unshiu_00806 | 109860 | 107989 | 1872  | 1.47  | 99.47 |
| scaffold00491 | 35398  | 37115  | 1718  | 1.06  | C_unshiu_02092 | 5573   | 3859   | 1715  | 4.66  | 99.24 |
| scaffold00491 | 40698  | 42993  | 2296  | 1.42  | C_unshiu_01917 | 3936   | 6230   | 2295  | 5.21  | 99.65 |
| scaffold00491 | 43117  | 51432  | 8316  | 5.14  | C_unshiu_01917 | 7070   | 15388  | 8319  | 18.87 | 99.53 |
| scaffold00491 | 55030  | 56589  | 1560  | 0.97  | C_unshiu_01917 | 20262  | 21805  | 1544  | 3.5   | 98.21 |
| scaffold00491 | 66860  | 73362  | 6503  | 4.02  | C_unshiu_01917 | 31788  | 38291  | 6504  | 14.75 | 99.8  |
| scaffold00491 | 74034  | 75597  | 1564  | 0.97  | C_unshiu_00086 | 467550 | 469113 | 1564  | 0.33  | 99.81 |
| scaffold00491 | 76058  | 85279  | 9222  | 5.71  | C_unshiu_01622 | 54758  | 45547  | 9212  | 16.29 | 99.34 |
| scaffold00491 | 85276  | 87376  | 2101  | 1.3   | C_unshiu_01622 | 44866  | 42768  | 2099  | 3.71  | 99.1  |
| scaffold00491 | 93306  | 107985 | 14680 | 9.08  | C_unshiu_01116 | 92923  | 78252  | 14672 | 15.59 | 99.59 |
| scaffold00491 | 109661 | 124201 | 14541 | 9     | C_unshiu_01116 | 76018  | 61479  | 14540 | 15.45 | 99.29 |
| scaffold00491 | 137406 | 139050 | 1645  | 1.02  | C_unshiu_01509 | 22488  | 20844  | 1645  | 2.62  | 100   |
| scaffold00491 | 139048 | 142499 | 3452  | 2.14  | C_unshiu_00675 | 114894 | 118347 | 3454  | 2.3   | 99.88 |
| scaffold00491 | 143401 | 148493 | 5093  | 3.15  | C_unshiu_00675 | 119625 | 124717 | 5093  | 3.4   | 100   |
| scaffold00491 | 148559 | 159550 | 10992 | 6.8   | C_unshiu_00675 | 125254 | 136247 | 10994 | 7.33  | 99.42 |
| scaffold00493 | 3398   | 37042  | 33645 | 20.84 | C_unshiu_01883 | 44340  | 10696  | 33645 | 74.38 | 99.99 |
| scaffold00493 | 39997  | 43780  | 3784  | 2.34  | C_unshiu_02127 | 32261  | 28478  | 3784  | 10.6  | 99.84 |
| scaffold00493 | 92237  | 93610  | 1374  | 0.85  | C_unshiu_00245 | 210252 | 208879 | 1374  | 0.46  | 100   |
| scaffold00493 | 99014  | 113054 | 14041 | 8.7   | C_unshiu_01414 | 4245   | 18336  | 14092 | 20.14 | 98.51 |
| scaffold00493 | 114496 | 125947 | 11452 | 7.09  | C_unshiu_01414 | 18332  | 29808  | 11477 | 16.4  | 98.29 |
| scaffold00493 | 126267 | 128229 | 1963  | 1.22  | C_unshiu_01414 | 33140  | 31183  | 1958  | 2.8   | 98.98 |
| scaffold00493 | 136317 | 149775 | 13459 | 8.34  | C_unshiu_01021 | 49819  | 63156  | 13338 | 12.85 | 98.42 |
| scaffold00496 | 824    | 20357  | 19534 | 12.26 | C_unshiu_01082 | 1842   | 21347  | 19506 | 19.95 | 99.78 |
| scaffold00496 | 20319  | 31308  | 10990 | 6.9   | C_unshiu_01082 | 21828  | 32817  | 10990 | 11.24 | 100   |
| scaffold00496 | 37035  | 39212  | 2178  | 1.37  | C_unshiu_01082 | 37860  | 40037  | 2178  | 2.23  | 100   |
| scaffold00496 | 62520  | 74769  | 12250 | 7.69  | C_unshiu_01082 | 54503  | 66799  | 12297 | 12.58 | 98.61 |
| scaffold00496 | 74953  | 97143  | 22191 | 13.93 | C_unshiu_01082 | 66806  | 89001  | 22196 | 22.71 | 99.8  |
| scaffold00496 | 103830 | 120656 | 16827 | 10.56 | C_unshiu_01135 | 40147  | 23340  | 16808 | 18.22 | 98.96 |
| scaffold00496 | 120651 | 125516 | 4866  | 3.05  | C_unshiu_01135 | 23242  | 18364  | 4879  | 5.29  | 99.39 |
| scaffold00496 | 122803 | 136032 | 13230 | 8.31  | C_unshiu_00821 | 126218 | 112982 | 13237 | 10.49 | 99.08 |
| scaffold00496 | 154518 | 159287 | 4770  | 2.99  | C_unshiu_00178 | 173257 | 168475 | 4783  | 1.33  | 99.25 |

|               |        |        |       |       |                |        |        |       |       |       |
|---------------|--------|--------|-------|-------|----------------|--------|--------|-------|-------|-------|
| scaffold00497 | 7064   | 9330   | 2267  | 1.42  | C_unshiu_03041 | 1      | 2258   | 2258  | 19.16 | 98.24 |
| scaffold00497 | 9359   | 10949  | 1591  | 1     | C_unshiu_02580 | 13102  | 14687  | 1586  | 7.03  | 99.56 |
| scaffold00497 | 28694  | 30939  | 2246  | 1.41  | C_unshiu_01040 | 53955  | 51710  | 2246  | 2.2   | 100   |
| scaffold00497 | 32633  | 37426  | 4794  | 3.01  | C_unshiu_00734 | 19417  | 14624  | 4794  | 3.47  | 100   |
| scaffold00497 | 67744  | 84572  | 16829 | 10.57 | C_unshiu_00285 | 225040 | 241835 | 16796 | 6.13  | 99.57 |
| scaffold00497 | 84573  | 86621  | 2049  | 1.29  | C_unshiu_00285 | 241992 | 244048 | 2057  | 0.75  | 98.16 |
| scaffold00497 | 87686  | 88865  | 1180  | 0.74  | C_unshiu_00285 | 245361 | 246540 | 1180  | 0.43  | 99.49 |
| scaffold00497 | 89485  | 95997  | 6513  | 4.09  | C_unshiu_01406 | 39915  | 46503  | 6589  | 9.39  | 98.18 |
| scaffold00497 | 97671  | 99091  | 1421  | 0.89  | C_unshiu_01406 | 47311  | 48732  | 1422  | 2.03  | 99.51 |
| scaffold00497 | 107988 | 111020 | 3033  | 1.91  | C_unshiu_01209 | 65369  | 68401  | 3033  | 3.58  | 100   |
| scaffold00497 | 125520 | 126723 | 1204  | 0.76  | C_unshiu_01213 | 40137  | 38934  | 1204  | 1.43  | 100   |
| scaffold00497 | 126716 | 129185 | 2470  | 1.55  | C_unshiu_00592 | 155510 | 157978 | 2469  | 1.46  | 99.51 |
| scaffold00497 | 133630 | 137498 | 3869  | 2.43  | C_unshiu_00592 | 163029 | 166884 | 3856  | 2.28  | 98.17 |
| scaffold00497 | 144027 | 152292 | 8266  | 5.19  | C_unshiu_03082 | 9572   | 1310   | 8263  | 83.25 | 99.83 |
| scaffold00497 | 152397 | 153582 | 1186  | 0.74  | C_unshiu_03082 | 1175   | 1      | 1175  | 11.84 | 98.82 |
| scaffold00497 | 157678 | 158685 | 1008  | 0.63  | C_unshiu_01406 | 65555  | 66562  | 1008  | 1.44  | 99.7  |
| scaffold00499 | 1      | 1671   | 1671  | 1.05  | C_unshiu_00561 | 165546 | 163876 | 1671  | 0.95  | 99.88 |
| scaffold00499 | 3402   | 5642   | 2241  | 1.41  | C_unshiu_00561 | 162326 | 160083 | 2244  | 1.28  | 99.69 |
| scaffold00499 | 6737   | 79854  | 73118 | 46.07 | C_unshiu_00561 | 160069 | 86980  | 73090 | 41.72 | 99.45 |
| scaffold00499 | 80732  | 82056  | 1325  | 0.83  | C_unshiu_00561 | 85912  | 84587  | 1326  | 0.76  | 99.92 |
| scaffold00499 | 82209  | 94278  | 12070 | 7.61  | C_unshiu_00561 | 84237  | 72168  | 12070 | 6.89  | 99.14 |
| scaffold00499 | 95924  | 97752  | 1829  | 1.15  | C_unshiu_00561 | 70212  | 68382  | 1831  | 1.05  | 99.45 |
| scaffold00499 | 97753  | 99373  | 1621  | 1.02  | C_unshiu_01507 | 45356  | 43736  | 1621  | 2.58  | 100   |
| scaffold00499 | 99366  | 101836 | 2471  | 1.56  | C_unshiu_00561 | 64983  | 62513  | 2471  | 1.41  | 99.68 |
| scaffold00499 | 102861 | 109340 | 6480  | 4.08  | C_unshiu_00561 | 60975  | 54467  | 6509  | 3.72  | 99.51 |
| scaffold00499 | 110271 | 112349 | 2079  | 1.31  | C_unshiu_00561 | 52969  | 50889  | 2081  | 1.19  | 99.52 |
| scaffold00499 | 112392 | 113888 | 1497  | 0.94  | C_unshiu_00561 | 51565  | 50068  | 1498  | 0.86  | 98.6  |
| scaffold00499 | 118460 | 132303 | 13844 | 8.72  | C_unshiu_00561 | 47231  | 33390  | 13842 | 7.9   | 99.64 |
| scaffold00499 | 132942 | 158709 | 25768 | 16.24 | C_unshiu_00561 | 32322  | 6578   | 25745 | 14.7  | 99.8  |
| scaffold00501 | 2121   | 3150   | 1030  | 0.65  | C_unshiu_01856 | 46236  | 45207  | 1030  | 2.23  | 99.81 |
| scaffold00501 | 3021   | 43156  | 40136 | 25.31 | C_unshiu_01856 | 45011  | 4897   | 40115 | 86.76 | 99.82 |
| scaffold00501 | 39343  | 43940  | 4598  | 2.9   | C_unshiu_01856 | 1      | 4591   | 4591  | 9.93  | 99.65 |
| scaffold00501 | 43978  | 69987  | 26010 | 16.4  | C_unshiu_02352 | 28356  | 2347   | 26010 | 91.73 | 100   |
| scaffold00501 | 75678  | 138676 | 62999 | 39.73 | C_unshiu_00028 | 66879  | 3879   | 63001 | 8.76  | 99.97 |
| scaffold00502 | 10840  | 35906  | 25067 | 15.83 | C_unshiu_02484 | 1      | 25055  | 25055 | 100   | 99.47 |
| scaffold00502 | 38158  | 57388  | 19231 | 12.15 | C_unshiu_00365 | 214133 | 233257 | 19125 | 8.16  | 98.96 |
| scaffold00502 | 57411  | 58506  | 1096  | 0.69  | C_unshiu_01420 | 25815  | 26908  | 1094  | 1.58  | 98.36 |
| scaffold00502 | 61064  | 63982  | 2919  | 1.84  | C_unshiu_00839 | 115491 | 112597 | 2895  | 2.34  | 98.36 |
| scaffold00502 | 65151  | 89382  | 24232 | 15.3  | C_unshiu_00839 | 109990 | 85759  | 24232 | 19.59 | 99.6  |
| scaffold00502 | 88178  | 98244  | 10067 | 6.36  | C_unshiu_00839 | 86534  | 76466  | 10069 | 8.14  | 99.51 |
| scaffold00502 | 108172 | 111404 | 3233  | 2.04  | C_unshiu_00839 | 69648  | 66415  | 3234  | 2.61  | 99.47 |
| scaffold00502 | 134771 | 150306 | 15536 | 9.81  | C_unshiu_02362 | 1      | 15536  | 15536 | 55.38 | 99.98 |
| scaffold00502 | 149982 | 151937 | 1956  | 1.24  | C_unshiu_02362 | 15275  | 17230  | 1956  | 6.97  | 98.93 |
| scaffold00502 | 151935 | 152968 | 1034  | 0.65  | C_unshiu_01482 | 8995   | 7962   | 1034  | 1.61  | 99.9  |
| scaffold00503 | 1      | 1014   | 1014  | 0.64  | C_unshiu_01789 | 17096  | 16083  | 1014  | 2.08  | 100   |
| scaffold00503 | 12544  | 27377  | 14834 | 9.38  | C_unshiu_02939 | 14730  | 1      | 14730 | 100   | 99.07 |
| scaffold00503 | 69498  | 71184  | 1687  | 1.07  | C_unshiu_00795 | 119654 | 117969 | 1686  | 1.31  | 99.82 |
| scaffold00503 | 74774  | 76467  | 1694  | 1.07  | C_unshiu_00213 | 267041 | 265341 | 1701  | 0.52  | 99.35 |
| scaffold00503 | 77200  | 79727  | 2528  | 1.6   | C_unshiu_00213 | 263795 | 261263 | 2533  | 0.78  | 99.17 |
| scaffold00503 | 84173  | 86273  | 2101  | 1.33  | C_unshiu_00213 | 257344 | 255244 | 2101  | 0.64  | 99.38 |
| scaffold00503 | 90644  | 94489  | 3846  | 2.43  | C_unshiu_02718 | 4296   | 452    | 3845  | 19.76 | 99.51 |
| scaffold00503 | 90767  | 99345  | 8579  | 5.43  | C_unshiu_02718 | 4409   | 12954  | 8546  | 43.91 | 98.63 |
| scaffold00503 | 111276 | 113379 | 2104  | 1.33  | C_unshiu_01011 | 28313  | 30416  | 2104  | 2.01  | 100   |
| scaffold00503 | 113375 | 118195 | 4821  | 3.05  | C_unshiu_01928 | 31580  | 26787  | 4794  | 10.94 | 98.51 |
| scaffold00503 | 128803 | 129906 | 1104  | 0.7   | C_unshiu_01789 | 48841  | 47738  | 1104  | 2.26  | 100   |
| scaffold00503 | 132448 | 149822 | 17375 | 10.99 | C_unshiu_01789 | 44535  | 27180  | 17356 | 35.54 | 99.18 |
| scaffold00503 | 153224 | 158116 | 4893  | 3.09  | C_unshiu_01789 | 24611  | 19719  | 4893  | 10.02 | 99.88 |
| scaffold00504 | 11545  | 14841  | 3297  | 2.09  | C_unshiu_01054 | 96045  | 92735  | 3311  | 3.32  | 99.22 |
| scaffold00504 | 15380  | 19875  | 4496  | 2.84  | C_unshiu_01054 | 92427  | 87929  | 4499  | 4.51  | 99.53 |
| scaffold00504 | 20901  | 22293  | 1393  | 0.88  | C_unshiu_01054 | 87573  | 86192  | 1382  | 1.39  | 99.07 |
| scaffold00504 | 22887  | 24670  | 1784  | 1.13  | C_unshiu_00631 | 77162  | 75376  | 1787  | 1.11  | 99.72 |
| scaffold00504 | 29757  | 32273  | 2517  | 1.59  | C_unshiu_01183 | 87119  | 84608  | 2512  | 2.88  | 99.8  |
| scaffold00504 | 32481  | 33686  | 1206  | 0.76  | C_unshiu_01183 | 84211  | 83007  | 1205  | 1.38  | 99.92 |
| scaffold00504 | 33891  | 45935  | 12045 | 7.62  | C_unshiu_01183 | 82583  | 70496  | 12088 | 13.87 | 99.33 |
| scaffold00504 | 46018  | 48190  | 2173  | 1.37  | C_unshiu_01183 | 70382  | 68211  | 2172  | 2.49  | 99.86 |
| scaffold00504 | 50306  | 53095  | 2790  | 1.77  | C_unshiu_01183 | 65566  | 62770  | 2797  | 3.21  | 98.47 |
| scaffold00504 | 54259  | 57623  | 3365  | 2.13  | C_unshiu_01183 | 62015  | 58669  | 3347  | 3.84  | 98.9  |
| scaffold00504 | 57624  | 61177  | 3554  | 2.25  | C_unshiu_01032 | 26917  | 30470  | 3554  | 3.45  | 100   |
| scaffold00504 | 61172  | 70824  | 9653  | 6.11  | C_unshiu_01183 | 55799  | 46143  | 9657  | 11.08 | 99.18 |
| scaffold00504 | 71851  | 74274  | 2424  | 1.53  | C_unshiu_01183 | 44821  | 42398  | 2424  | 2.78  | 100   |
| scaffold00504 | 78416  | 80561  | 2146  | 1.36  | C_unshiu_01183 | 38361  | 36216  | 2146  | 2.46  | 99.86 |
| scaffold00504 | 83382  | 84390  | 1009  | 0.64  | C_unshiu_01183 | 34704  | 33694  | 1011  | 1.16  | 99.7  |
| scaffold00504 | 90095  | 92260  | 2166  | 1.37  | C_unshiu_01398 | 8288   | 6120   | 2169  | 3.08  | 99.03 |
| scaffold00504 | 94923  | 99583  | 4661  | 2.95  | C_unshiu_00266 | 158265 | 162925 | 4661  | 1.64  | 99.91 |
| scaffold00504 | 105632 | 108507 | 2876  | 1.82  | C_unshiu_00266 | 162665 | 165540 | 2876  | 1.01  | 99.97 |
| scaffold00504 | 108892 | 111109 | 2218  | 1.4   | C_unshiu_00266 | 166291 | 168509 | 2219  | 0.78  | 99.95 |
| scaffold00504 | 117634 | 137709 | 20076 | 12.7  | C_unshiu_01183 | 19887  | 1      | 19887 | 22.83 | 98.54 |
| scaffold00504 | 138085 | 156091 | 18007 | 11.39 | C_unshiu_00543 | 175515 | 157750 | 17766 | 9.89  | 98.16 |
| scaffold00506 | 1547   | 3512   | 1966  | 1.25  | C_unshiu_02001 | 37169  | 35204  | 1966  | 4.85  | 100   |

|               |        |        |       |       |                |        |        |       |       |       |
|---------------|--------|--------|-------|-------|----------------|--------|--------|-------|-------|-------|
| scaffold00506 | 3588   | 4597   | 1010  | 0.64  | C_unshiu_02001 | 35111  | 34102  | 1010  | 2.49  | 99.9  |
| scaffold00506 | 6945   | 9076   | 2132  | 1.36  | C_unshiu_02001 | 30999  | 28867  | 2133  | 5.26  | 99.86 |
| scaffold00506 | 10199  | 17855  | 7657  | 4.88  | C_unshiu_02001 | 27266  | 19625  | 7642  | 18.85 | 99.63 |
| scaffold00506 | 30591  | 32702  | 2112  | 1.35  | C_unshiu_02001 | 8862   | 6762   | 2101  | 5.18  | 99.05 |
| scaffold00506 | 54646  | 58355  | 3710  | 2.36  | C_unshiu_00809 | 59561  | 55851  | 3711  | 2.91  | 99.81 |
| scaffold00506 | 59456  | 63320  | 3865  | 2.46  | C_unshiu_00809 | 52307  | 48470  | 3838  | 3.01  | 98.91 |
| scaffold00506 | 63528  | 68629  | 5102  | 3.25  | C_unshiu_00809 | 48335  | 43246  | 5090  | 3.99  | 99.26 |
| scaffold00506 | 68624  | 84543  | 15920 | 10.14 | C_unshiu_00809 | 42918  | 27050  | 15869 | 12.45 | 99.16 |
| scaffold00506 | 89230  | 90551  | 1322  | 0.84  | C_unshiu_01691 | 20870  | 19547  | 1324  | 2.5   | 98.94 |
| scaffold00506 | 91761  | 97411  | 5651  | 3.6   | C_unshiu_01691 | 18089  | 12440  | 5650  | 10.69 | 98.89 |
| scaffold00506 | 103300 | 108805 | 5506  | 3.51  | C_unshiu_00755 | 12946  | 18429  | 5484  | 4.05  | 98.37 |
| scaffold00506 | 103300 | 108719 | 5420  | 3.45  | C_unshiu_01691 | 5421   | 1      | 5421  | 10.25 | 99.52 |
| scaffold00506 | 108870 | 117021 | 8152  | 5.19  | C_unshiu_00755 | 18966  | 27129  | 8164  | 6.03  | 99.03 |
| scaffold00506 | 118095 | 120390 | 2296  | 1.46  | C_unshiu_00961 | 4818   | 7114   | 2297  | 2.08  | 99.83 |
| scaffold00506 | 122935 | 124185 | 1251  | 0.8   | C_unshiu_00961 | 10850  | 12101  | 1252  | 1.13  | 99.92 |
| scaffold00506 | 124341 | 142668 | 18328 | 11.67 | C_unshiu_00961 | 12296  | 30623  | 18328 | 16.58 | 99.92 |
| scaffold00506 | 144536 | 147305 | 2770  | 1.76  | C_unshiu_00961 | 32809  | 35552  | 2744  | 2.48  | 98.99 |
| scaffold00506 | 155969 | 157013 | 1045  | 0.67  | C_unshiu_00961 | 44209  | 45253  | 1045  | 0.95  | 99.81 |
| scaffold00507 | 1      | 5478   | 5478  | 3.5   | C_unshiu_01790 | 15750  | 10268  | 5483  | 11.23 | 99.91 |
| scaffold00507 | 8452   | 12085  | 3634  | 2.32  | C_unshiu_01790 | 6390   | 2755   | 3636  | 7.45  | 99.83 |
| scaffold00507 | 13727  | 17546  | 3820  | 2.44  | C_unshiu_00790 | 89966  | 86141  | 3826  | 2.95  | 99.03 |
| scaffold00507 | 31335  | 43487  | 12153 | 7.76  | C_unshiu_00991 | 73225  | 61073  | 12153 | 11.32 | 99.98 |
| scaffold00507 | 44342  | 45686  | 1345  | 0.86  | C_unshiu_00991 | 61074  | 59711  | 1364  | 1.27  | 98.17 |
| scaffold00507 | 46381  | 49902  | 3522  | 2.25  | C_unshiu_00906 | 110467 | 106946 | 3522  | 3.03  | 100   |
| scaffold00507 | 61790  | 63154  | 1365  | 0.87  | C_unshiu_00906 | 101260 | 99896  | 1365  | 1.17  | 100   |
| scaffold00507 | 67572  | 70754  | 3183  | 2.03  | C_unshiu_02625 | 13243  | 16424  | 3182  | 14.76 | 99.97 |
| scaffold00507 | 70886  | 75085  | 4200  | 2.68  | C_unshiu_00790 | 2411   | 6559   | 4149  | 3.2   | 98.36 |
| scaffold00507 | 77650  | 79425  | 1776  | 1.13  | C_unshiu_02625 | 19354  | 21125  | 1772  | 8.22  | 98.03 |
| scaffold00507 | 84251  | 85727  | 1477  | 0.94  | C_unshiu_00790 | 14571  | 16033  | 1463  | 1.13  | 98.71 |
| scaffold00507 | 87190  | 90050  | 2861  | 1.83  | C_unshiu_00790 | 17756  | 20616  | 2861  | 2.2   | 98.99 |
| scaffold00507 | 90069  | 93184  | 3116  | 1.99  | C_unshiu_00790 | 20815  | 23933  | 3119  | 2.4   | 99.36 |
| scaffold00507 | 93807  | 97079  | 3273  | 2.09  | C_unshiu_01062 | 51409  | 54681  | 3273  | 3.31  | 99.94 |
| scaffold00507 | 97066  | 98065  | 1000  | 0.64  | C_unshiu_02552 | 15722  | 14723  | 1000  | 4.31  | 98.3  |
| scaffold00507 | 101705 | 113129 | 11425 | 7.29  | C_unshiu_01119 | 1      | 11492  | 11492 | 12.23 | 98.56 |
| scaffold00507 | 117588 | 125943 | 8356  | 5.33  | C_unshiu_01119 | 13254  | 21608  | 8355  | 8.89  | 99.64 |
| scaffold00507 | 127448 | 128885 | 1438  | 0.92  | C_unshiu_01119 | 23592  | 25030  | 1439  | 1.53  | 99.72 |
| scaffold00507 | 128901 | 131775 | 2875  | 1.83  | C_unshiu_01443 | 22885  | 25769  | 2885  | 4.29  | 99.06 |
| scaffold00507 | 132809 | 139435 | 6627  | 4.23  | C_unshiu_01119 | 30216  | 36842  | 6627  | 7.05  | 99.34 |
| scaffold00507 | 145444 | 147859 | 2416  | 1.54  | C_unshiu_01443 | 32972  | 35390  | 2419  | 3.6   | 98.22 |
| scaffold00507 | 147860 | 149248 | 1389  | 0.89  | C_unshiu_00953 | 87902  | 89290  | 1389  | 1.25  | 100   |
| scaffold00507 | 149602 | 153213 | 3612  | 2.3   | C_unshiu_01443 | 37443  | 41054  | 3612  | 5.37  | 99.45 |
| scaffold00507 | 153395 | 156708 | 3314  | 2.11  | C_unshiu_01443 | 41436  | 44749  | 3314  | 4.93  | 100   |
| scaffold00508 | 1      | 3840   | 3840  | 2.46  | C_unshiu_00378 | 45569  | 49406  | 3838  | 1.67  | 98.46 |
| scaffold00508 | 11970  | 14581  | 2612  | 1.67  | C_unshiu_00378 | 57343  | 59955  | 2613  | 1.13  | 98.28 |
| scaffold00508 | 16545  | 22812  | 6268  | 4.01  | C_unshiu_00378 | 66256  | 72523  | 6268  | 2.72  | 99.65 |
| scaffold00508 | 26681  | 29383  | 2703  | 1.73  | C_unshiu_00378 | 75276  | 77976  | 2701  | 1.17  | 99.89 |
| scaffold00508 | 35374  | 37394  | 2021  | 1.29  | C_unshiu_00378 | 84180  | 86200  | 2021  | 0.88  | 100   |
| scaffold00508 | 37917  | 42809  | 4893  | 3.13  | C_unshiu_00378 | 86963  | 91845  | 4883  | 2.12  | 99.53 |
| scaffold00508 | 44312  | 52476  | 8165  | 5.23  | C_unshiu_00378 | 93953  | 102117 | 8165  | 3.54  | 99.95 |
| scaffold00508 | 58531  | 60156  | 1626  | 1.04  | C_unshiu_00329 | 86825  | 85200  | 1626  | 0.64  | 99.82 |
| scaffold00508 | 59558  | 65303  | 5746  | 3.68  | C_unshiu_00329 | 85684  | 79932  | 5753  | 2.28  | 99.39 |
| scaffold00508 | 65794  | 68145  | 2352  | 1.51  | C_unshiu_00378 | 101677 | 104023 | 2347  | 1.02  | 98.72 |
| scaffold00508 | 68143  | 69748  | 1606  | 1.03  | C_unshiu_00329 | 77647  | 76040  | 1608  | 0.64  | 99.44 |
| scaffold00508 | 69748  | 71204  | 1457  | 0.93  | C_unshiu_00378 | 105146 | 106601 | 1456  | 0.63  | 99.45 |
| scaffold00508 | 71197  | 72950  | 1754  | 1.12  | C_unshiu_01040 | 53963  | 52210  | 1754  | 1.72  | 100   |
| scaffold00508 | 79665  | 81287  | 1623  | 1.04  | C_unshiu_00329 | 69483  | 67861  | 1623  | 0.64  | 99.94 |
| scaffold00508 | 82405  | 88255  | 5851  | 3.75  | C_unshiu_00378 | 39298  | 45136  | 5839  | 2.53  | 99.5  |
| scaffold00508 | 89697  | 90824  | 1128  | 0.72  | C_unshiu_00329 | 58325  | 57198  | 1128  | 0.45  | 99.82 |
| scaffold00508 | 96589  | 102786 | 6198  | 3.97  | C_unshiu_00329 | 49804  | 43530  | 6275  | 2.49  | 98.26 |
| scaffold00508 | 104938 | 110370 | 5433  | 3.48  | C_unshiu_00329 | 38179  | 32749  | 5431  | 2.15  | 98.72 |
| scaffold00508 | 110952 | 118889 | 7938  | 5.08  | C_unshiu_00329 | 31839  | 23894  | 7946  | 3.15  | 99.16 |
| scaffold00508 | 123868 | 127373 | 3506  | 2.24  | C_unshiu_00036 | 49795  | 53300  | 3506  | 0.51  | 100   |
| scaffold00508 | 127454 | 132963 | 5510  | 3.53  | C_unshiu_00329 | 19000  | 13500  | 5501  | 2.18  | 98.95 |
| scaffold00508 | 133017 | 135214 | 2198  | 1.41  | C_unshiu_00329 | 13217  | 11019  | 2199  | 0.87  | 99.41 |
| scaffold00508 | 133017 | 135214 | 2198  | 1.41  | C_unshiu_00624 | 1102   | 3299   | 2198  | 1.36  | 99.73 |
| scaffold00508 | 142293 | 155716 | 13424 | 8.59  | C_unshiu_00624 | 14157  | 27637  | 13481 | 8.32  | 99.31 |
| scaffold00511 | 1      | 2862   | 2862  | 1.84  | C_unshiu_00165 | 297069 | 299930 | 2862  | 0.77  | 99.79 |
| scaffold00511 | 3171   | 12285  | 9115  | 5.87  | C_unshiu_00165 | 301052 | 310192 | 9141  | 2.47  | 99.49 |
| scaffold00511 | 12348  | 39235  | 26888 | 17.3  | C_unshiu_00165 | 310640 | 337571 | 26932 | 7.28  | 99.48 |
| scaffold00511 | 46596  | 54083  | 7488  | 4.82  | C_unshiu_00165 | 347129 | 354620 | 7492  | 2.03  | 99.01 |
| scaffold00511 | 54593  | 61802  | 7210  | 4.64  | C_unshiu_00165 | 354802 | 361992 | 7191  | 1.94  | 99.07 |
| scaffold00511 | 62308  | 85975  | 23668 | 15.23 | C_unshiu_01373 | 8848   | 32608  | 23761 | 32.78 | 99.18 |
| scaffold00511 | 86122  | 98610  | 12489 | 8.04  | C_unshiu_01373 | 32723  | 45190  | 12468 | 17.2  | 99.68 |
| scaffold00511 | 107231 | 115176 | 7946  | 5.11  | C_unshiu_01373 | 50850  | 58795  | 7946  | 10.96 | 100   |
| scaffold00511 | 119519 | 121824 | 2306  | 1.48  | C_unshiu_01373 | 65166  | 67471  | 2306  | 3.18  | 100   |
| scaffold00511 | 139949 | 142382 | 2434  | 1.57  | C_unshiu_00328 | 252916 | 250483 | 2434  | 0.96  | 100   |
| scaffold00511 | 144703 | 148311 | 3609  | 2.32  | C_unshiu_00328 | 243824 | 240219 | 3606  | 1.43  | 99.42 |
| scaffold00511 | 149222 | 150462 | 1241  | 0.8   | C_unshiu_00328 | 239166 | 237937 | 1230  | 0.49  | 98.23 |
| scaffold00511 | 150956 | 151958 | 1003  | 0.65  | C_unshiu_00167 | 16304  | 15302  | 1003  | 0.27  | 100   |

|               |        |        |       |       |                |        |        |       |       |       |
|---------------|--------|--------|-------|-------|----------------|--------|--------|-------|-------|-------|
| scaffold00512 | 6716   | 58354  | 51639 | 33.29 | C_unshiu_00060 | 440764 | 492407 | 51644 | 8.92  | 99.56 |
| scaffold00512 | 58379  | 69176  | 10798 | 6.96  | C_unshiu_00060 | 492273 | 503100 | 10828 | 1.87  | 99.68 |
| scaffold00512 | 68761  | 81834  | 13074 | 8.43  | C_unshiu_00060 | 502891 | 515964 | 13074 | 2.26  | 100   |
| scaffold00512 | 81851  | 138447 | 56597 | 36.48 | C_unshiu_00060 | 516347 | 572943 | 56597 | 9.77  | 99.96 |
| scaffold00512 | 138259 | 150300 | 12042 | 7.76  | C_unshiu_00635 | 158582 | 146530 | 12053 | 7.54  | 99.84 |
| scaffold00512 | 152314 | 154877 | 2564  | 1.65  | C_unshiu_00635 | 143135 | 140558 | 2578  | 1.61  | 98.49 |
| scaffold00513 | 15926  | 17906  | 1981  | 1.28  | C_unshiu_01491 | 36608  | 34628  | 1981  | 3.11  | 100   |
| scaffold00513 | 20876  | 22825  | 1950  | 1.26  | C_unshiu_01049 | 77774  | 75826  | 1949  | 1.95  | 99.79 |
| scaffold00513 | 27308  | 38020  | 10713 | 6.93  | C_unshiu_01049 | 71820  | 61108  | 10713 | 10.71 | 99.99 |
| scaffold00513 | 37695  | 60793  | 23099 | 14.94 | C_unshiu_01049 | 61110  | 38007  | 23104 | 23.09 | 99.81 |
| scaffold00513 | 61514  | 70024  | 8511  | 5.5   | C_unshiu_01049 | 36742  | 28220  | 8523  | 8.52  | 99.07 |
| scaffold00513 | 70038  | 71158  | 1121  | 0.72  | C_unshiu_00575 | 83458  | 82338  | 1121  | 0.65  | 100   |
| scaffold00513 | 71153  | 74971  | 3819  | 2.47  | C_unshiu_01049 | 25938  | 22100  | 3839  | 3.84  | 98.08 |
| scaffold00513 | 84334  | 92134  | 7801  | 5.04  | C_unshiu_01049 | 18301  | 10471  | 7831  | 7.83  | 99.07 |
| scaffold00513 | 94420  | 96741  | 2322  | 1.5   | C_unshiu_00016 | 21005  | 23327  | 2323  | 0.27  | 98.45 |
| scaffold00513 | 98528  | 117406 | 18879 | 12.21 | C_unshiu_00016 | 25476  | 44471  | 18996 | 2.18  | 98.15 |
| scaffold00513 | 123396 | 124754 | 1359  | 0.88  | C_unshiu_01261 | 74189  | 72829  | 1361  | 1.7   | 98.83 |
| scaffold00513 | 130147 | 131181 | 1035  | 0.67  | C_unshiu_00016 | 56039  | 57077  | 1039  | 0.12  | 99.04 |
| scaffold00513 | 133461 | 134974 | 1514  | 0.98  | C_unshiu_00511 | 149362 | 147849 | 1514  | 0.8   | 99.41 |
| scaffold00513 | 135821 | 144355 | 8535  | 5.52  | C_unshiu_00511 | 146565 | 138031 | 8535  | 4.54  | 99.98 |
| scaffold00513 | 146528 | 149138 | 2611  | 1.69  | C_unshiu_00482 | 94581  | 91972  | 2610  | 1.32  | 99.89 |
| scaffold00513 | 149118 | 150777 | 1660  | 1.07  | C_unshiu_00511 | 134136 | 132476 | 1661  | 0.88  | 99.46 |
| scaffold00514 | 1      | 33348  | 33348 | 21.72 | C_unshiu_00068 | 35577  | 2191   | 33387 | 6.32  | 99.85 |
| scaffold00514 | 46311  | 47985  | 1675  | 1.09  | C_unshiu_00600 | 165648 | 163969 | 1680  | 1     | 98.57 |
| scaffold00514 | 48604  | 51718  | 3115  | 2.03  | C_unshiu_00600 | 163041 | 159928 | 3114  | 1.86  | 99.78 |
| scaffold00514 | 52222  | 63657  | 11436 | 7.45  | C_unshiu_00600 | 158990 | 147554 | 11437 | 6.82  | 99.99 |
| scaffold00514 | 65806  | 138957 | 73152 | 47.65 | C_unshiu_00600 | 144648 | 71495  | 73154 | 43.64 | 99.98 |
| scaffold00514 | 143767 | 148277 | 4511  | 2.94  | C_unshiu_00600 | 67054  | 62538  | 4517  | 2.69  | 99.87 |
| scaffold00514 | 150578 | 152352 | 1775  | 1.16  | C_unshiu_00600 | 60722  | 58924  | 1799  | 1.07  | 98.05 |
| scaffold00516 | 666    | 1888   | 1223  | 0.8   | C_unshiu_02124 | 6651   | 7873   | 1223  | 3.42  | 99.92 |
| scaffold00516 | 1881   | 4312   | 2432  | 1.59  | C_unshiu_00158 | 320268 | 322699 | 2432  | 0.65  | 100   |
| scaffold00516 | 8161   | 9688   | 1528  | 1     | C_unshiu_02124 | 13141  | 14672  | 1532  | 4.28  | 98.18 |
| scaffold00516 | 12281  | 24780  | 12500 | 8.17  | C_unshiu_02124 | 17774  | 30279  | 12506 | 34.94 | 99.3  |
| scaffold00516 | 24193  | 25597  | 1405  | 0.92  | C_unshiu_02124 | 29927  | 31331  | 1405  | 3.92  | 99.72 |
| scaffold00516 | 25389  | 29876  | 4488  | 2.93  | C_unshiu_02124 | 31328  | 35795  | 4468  | 12.48 | 99.29 |
| scaffold00516 | 35426  | 40245  | 4820  | 3.15  | C_unshiu_00021 | 63957  | 68778  | 4822  | 0.61  | 99.96 |
| scaffold00516 | 42178  | 52935  | 10758 | 7.03  | C_unshiu_00021 | 71083  | 81840  | 10758 | 1.37  | 99.98 |
| scaffold00516 | 54763  | 62041  | 7279  | 4.76  | C_unshiu_00021 | 84025  | 91222  | 7198  | 0.92  | 98.65 |
| scaffold00516 | 68647  | 69759  | 1113  | 0.73  | C_unshiu_00021 | 95133  | 96245  | 1113  | 0.14  | 99.55 |
| scaffold00516 | 71079  | 83098  | 12020 | 7.85  | C_unshiu_00021 | 98031  | 110053 | 12023 | 1.53  | 99.83 |
| scaffold00516 | 80581  | 83517  | 2937  | 1.92  | C_unshiu_00356 | 198902 | 201849 | 2948  | 1.24  | 98.54 |
| scaffold00516 | 87836  | 89760  | 1925  | 1.26  | C_unshiu_00743 | 6205   | 8129   | 1925  | 1.4   | 99.38 |
| scaffold00516 | 98025  | 102642 | 4618  | 3.02  | C_unshiu_00743 | 10631  | 15266  | 4636  | 3.38  | 98.19 |
| scaffold00516 | 141437 | 147210 | 5774  | 3.77  | C_unshiu_00743 | 40444  | 46198  | 5755  | 4.19  | 98.6  |
| scaffold00517 | 1      | 12036  | 12036 | 7.87  | C_unshiu_00786 | 118840 | 106804 | 12037 | 9.22  | 98.79 |
| scaffold00517 | 12036  | 19282  | 7247  | 4.74  | C_unshiu_00417 | 46693  | 53939  | 7247  | 3.3   | 100   |
| scaffold00517 | 19283  | 20419  | 1137  | 0.74  | C_unshiu_00786 | 100525 | 99389  | 1137  | 0.87  | 100   |
| scaffold00517 | 22228  | 24379  | 2152  | 1.41  | C_unshiu_00786 | 97645  | 95494  | 2152  | 1.65  | 100   |
| scaffold00517 | 24642  | 25917  | 1276  | 0.83  | C_unshiu_00786 | 129272 | 127997 | 1276  | 0.98  | 100   |
| scaffold00517 | 26027  | 43925  | 17899 | 11.71 | C_unshiu_00786 | 93514  | 75618  | 17897 | 13.72 | 99.7  |
| scaffold00517 | 44015  | 45301  | 1287  | 0.84  | C_unshiu_00786 | 102348 | 101062 | 1287  | 0.99  | 99.53 |
| scaffold00517 | 46382  | 103935 | 57554 | 37.64 | C_unshiu_00786 | 75565  | 17991  | 57575 | 44.12 | 99.9  |
| scaffold00517 | 109510 | 116070 | 6561  | 4.29  | C_unshiu_00285 | 247070 | 253618 | 6549  | 2.39  | 99.24 |
| scaffold00517 | 118627 | 126061 | 7435  | 4.86  | C_unshiu_01684 | 45859  | 53293  | 7435  | 13.95 | 99.44 |
| scaffold00517 | 145374 | 148519 | 3146  | 2.06  | C_unshiu_02895 | 8407   | 11552  | 3146  | 19.79 | 100   |
| scaffold00517 | 148539 | 152895 | 4357  | 2.85  | C_unshiu_01474 | 43625  | 39285  | 4341  | 6.69  | 98.83 |
| scaffold00518 | 21001  | 29356  | 8356  | 5.47  | C_unshiu_00803 | 69599  | 77959  | 8361  | 6.54  | 99.19 |
| scaffold00518 | 32418  | 44678  | 12261 | 8.02  | C_unshiu_00803 | 80898  | 93166  | 12269 | 9.59  | 98.83 |
| scaffold00518 | 46012  | 58060  | 12049 | 7.88  | C_unshiu_00803 | 93162  | 105221 | 12060 | 9.43  | 99.49 |
| scaffold00518 | 58316  | 62892  | 4577  | 3     | C_unshiu_00803 | 105220 | 109799 | 4580  | 3.58  | 99.74 |
| scaffold00518 | 64835  | 72649  | 7815  | 5.11  | C_unshiu_00803 | 110422 | 118246 | 7825  | 6.12  | 99.3  |
| scaffold00518 | 75516  | 76617  | 1102  | 0.72  | C_unshiu_03105 | 1      | 1102   | 1102  | 12.03 | 98.73 |
| scaffold00518 | 76746  | 83002  | 6257  | 4.09  | C_unshiu_03105 | 1229   | 7435   | 6207  | 67.77 | 98.12 |
| scaffold00518 | 83010  | 87678  | 4669  | 3.06  | C_unshiu_01191 | 44263  | 39595  | 4669  | 5.41  | 99.96 |
| scaffold00518 | 88332  | 90495  | 2164  | 1.42  | C_unshiu_01292 | 62728  | 64872  | 2145  | 2.74  | 98.98 |
| scaffold00518 | 98879  | 102487 | 3609  | 2.36  | C_unshiu_00468 | 19200  | 22808  | 3609  | 1.79  | 99.92 |
| scaffold00518 | 105908 | 107439 | 1532  | 1     | C_unshiu_00468 | 25337  | 26868  | 1532  | 0.76  | 99.87 |
| scaffold00518 | 108174 | 109962 | 1789  | 1.17  | C_unshiu_00468 | 27065  | 28853  | 1789  | 0.89  | 99.66 |
| scaffold00518 | 111371 | 113432 | 2062  | 1.35  | C_unshiu_00468 | 30816  | 32877  | 2062  | 1.02  | 100   |
| scaffold00518 | 114462 | 116120 | 1659  | 1.09  | C_unshiu_01039 | 94643  | 92986  | 1658  | 1.62  | 99.82 |
| scaffold00518 | 116279 | 119679 | 3401  | 2.23  | C_unshiu_01039 | 91949  | 88549  | 3401  | 3.33  | 100   |
| scaffold00518 | 122856 | 126795 | 3940  | 2.58  | C_unshiu_01292 | 26672  | 30613  | 3942  | 5.04  | 99.82 |
| scaffold00518 | 127735 | 135237 | 7503  | 4.91  | C_unshiu_01292 | 31743  | 39242  | 7500  | 9.6   | 99.75 |
| scaffold00518 | 135238 | 137552 | 2315  | 1.51  | C_unshiu_00156 | 293108 | 295422 | 2315  | 0.61  | 100   |
| scaffold00518 | 138880 | 149218 | 10339 | 6.77  | C_unshiu_01292 | 41597  | 51946  | 10350 | 13.24 | 99.11 |
| scaffold00519 | 2333   | 7721   | 5389  | 3.53  | C_unshiu_01718 | 14174  | 8786   | 5389  | 10.39 | 100   |
| scaffold00519 | 9458   | 12788  | 3331  | 2.18  | C_unshiu_01015 | 50257  | 53587  | 3331  | 3.19  | 100   |
| scaffold00519 | 27583  | 31203  | 3621  | 2.37  | C_unshiu_00268 | 5807   | 2205   | 3603  | 1.28  | 98.23 |
| scaffold00519 | 31322  | 33244  | 1923  | 1.26  | C_unshiu_00268 | 1923   | 1      | 1923  | 0.68  | 99.95 |

|               |        |        |       |       |                |        |        |       |       |       |
|---------------|--------|--------|-------|-------|----------------|--------|--------|-------|-------|-------|
| scaffold00519 | 42518  | 56304  | 13787 | 9.03  | C_unshiu_02720 | 1      | 13779  | 13779 | 71.02 | 98.38 |
| scaffold00519 | 57358  | 58791  | 1434  | 0.94  | C_unshiu_00115 | 353983 | 352550 | 1434  | 0.33  | 99.79 |
| scaffold00519 | 83413  | 91054  | 7642  | 5     | C_unshiu_00732 | 50860  | 43255  | 7606  | 5.49  | 98.68 |
| scaffold00519 | 96103  | 98964  | 2862  | 1.87  | C_unshiu_02238 | 2865   | 1      | 2865  | 8.93  | 99.83 |
| scaffold00519 | 119297 | 126353 | 7057  | 4.62  | C_unshiu_00419 | 166505 | 159428 | 7078  | 3.23  | 98.7  |
| scaffold00519 | 135291 | 138044 | 2754  | 1.8   | C_unshiu_00419 | 157959 | 155210 | 2750  | 1.25  | 99.02 |
| scaffold00520 | 10461  | 13585  | 3125  | 2.05  | C_unshiu_02179 | 33154  | 30026  | 3129  | 9.2   | 99.68 |
| scaffold00520 | 44214  | 45960  | 1747  | 1.15  | C_unshiu_01071 | 53964  | 55710  | 1747  | 1.77  | 99.66 |
| scaffold00520 | 51861  | 53746  | 1886  | 1.24  | C_unshiu_01071 | 64925  | 66794  | 1870  | 1.89  | 98.2  |
| scaffold00520 | 53754  | 55094  | 1341  | 0.88  | C_unshiu_01071 | 64093  | 65432  | 1340  | 1.36  | 99.63 |
| scaffold00520 | 57932  | 61001  | 3070  | 2.02  | C_unshiu_00095 | 128803 | 131872 | 3070  | 0.66  | 100   |
| scaffold00520 | 70020  | 72672  | 2653  | 1.74  | C_unshiu_00720 | 141299 | 138646 | 2654  | 1.88  | 99.66 |
| scaffold00520 | 72680  | 80753  | 8074  | 5.3   | C_unshiu_00878 | 109338 | 101319 | 8020  | 6.71  | 98.37 |
| scaffold00520 | 83524  | 85232  | 1709  | 1.12  | C_unshiu_00878 | 98847  | 97139  | 1709  | 1.43  | 100   |
| scaffold00520 | 106019 | 108292 | 2274  | 1.49  | C_unshiu_00878 | 65270  | 62991  | 2280  | 1.91  | 98.64 |
| scaffold00520 | 109511 | 116615 | 7105  | 4.67  | C_unshiu_00859 | 44972  | 52089  | 7118  | 5.85  | 99.34 |
| scaffold00520 | 117705 | 119634 | 1930  | 1.27  | C_unshiu_00859 | 53575  | 55503  | 1929  | 1.58  | 99.53 |
| scaffold00520 | 119629 | 124290 | 4662  | 3.06  | C_unshiu_00463 | 98015  | 102676 | 4662  | 2.29  | 100   |
| scaffold00520 | 125104 | 126913 | 1810  | 1.19  | C_unshiu_00859 | 61985  | 63794  | 1810  | 1.49  | 100   |
| scaffold00520 | 127986 | 130134 | 2149  | 1.41  | C_unshiu_01482 | 11390  | 13536  | 2147  | 3.35  | 99.63 |
| scaffold00520 | 132013 | 133369 | 1357  | 0.89  | C_unshiu_01482 | 15864  | 17196  | 1333  | 2.08  | 98.09 |
| scaffold00520 | 135362 | 140161 | 4800  | 3.15  | C_unshiu_01482 | 19825  | 24622  | 4798  | 7.48  | 99.6  |
| scaffold00520 | 140162 | 143750 | 3589  | 2.36  | C_unshiu_01482 | 24719  | 28353  | 3635  | 5.67  | 98.18 |
| scaffold00520 | 143212 | 148154 | 4943  | 3.25  | C_unshiu_00720 | 97274  | 92345  | 4930  | 3.49  | 98.4  |
| scaffold00520 | 148121 | 149215 | 1095  | 0.72  | C_unshiu_02531 | 9813   | 10907  | 1095  | 4.59  | 99.45 |
| scaffold00521 | 9838   | 15284  | 5447  | 3.58  | C_unshiu_02759 | 1      | 5447   | 5447  | 28.82 | 99.69 |
| scaffold00521 | 23828  | 28628  | 4801  | 3.15  | C_unshiu_02759 | 14051  | 18851  | 4801  | 25.4  | 100   |
| scaffold00521 | 41380  | 43343  | 1964  | 1.29  | C_unshiu_01739 | 1028   | 2990   | 1963  | 3.84  | 99.75 |
| scaffold00521 | 43341  | 44835  | 1495  | 0.98  | C_unshiu_01739 | 3474   | 4968   | 1495  | 2.92  | 99.26 |
| scaffold00521 | 46311  | 57971  | 11661 | 7.66  | C_unshiu_01739 | 7143   | 18781  | 11639 | 22.77 | 99.27 |
| scaffold00521 | 58823  | 63750  | 4928  | 3.24  | C_unshiu_01739 | 19632  | 24559  | 4928  | 9.64  | 99.94 |
| scaffold00521 | 64514  | 66020  | 1507  | 0.99  | C_unshiu_01739 | 25482  | 26988  | 1507  | 2.95  | 100   |
| scaffold00521 | 66041  | 74964  | 8924  | 5.86  | C_unshiu_01739 | 27707  | 36630  | 8924  | 17.46 | 100   |
| scaffold00521 | 76524  | 78730  | 2207  | 1.45  | C_unshiu_01739 | 38957  | 41163  | 2207  | 4.32  | 100   |
| scaffold00521 | 78647  | 79705  | 1059  | 0.7   | C_unshiu_01739 | 41144  | 42201  | 1058  | 2.07  | 99.91 |
| scaffold00521 | 79841  | 84679  | 4839  | 3.18  | C_unshiu_01739 | 42651  | 47487  | 4837  | 9.46  | 99.88 |
| scaffold00521 | 99849  | 106219 | 6371  | 4.19  | C_unshiu_01932 | 36709  | 43127  | 6419  | 14.76 | 98.88 |
| scaffold00521 | 109887 | 111687 | 1801  | 1.18  | C_unshiu_02380 | 1785   | 1      | 1785  | 6.44  | 98.89 |
| scaffold00521 | 110184 | 117622 | 7439  | 4.89  | C_unshiu_02380 | 1935   | 9268   | 7334  | 26.48 | 98.21 |
| scaffold00521 | 122293 | 131948 | 9656  | 6.34  | C_unshiu_02380 | 18069  | 27699  | 9631  | 34.77 | 99.31 |
| scaffold00521 | 135107 | 141955 | 6849  | 4.5   | C_unshiu_00409 | 220728 | 213867 | 6862  | 3.1   | 99.74 |
| scaffold00521 | 142119 | 145210 | 3092  | 2.03  | C_unshiu_00409 | 213389 | 210298 | 3092  | 1.4   | 99.97 |
| scaffold00521 | 146251 | 151461 | 5211  | 3.42  | C_unshiu_01533 | 11943  | 17153  | 5211  | 8.47  | 100   |
| scaffold00522 | 5288   | 22988  | 17701 | 11.64 | C_unshiu_02440 | 5654   | 23335  | 17682 | 66.84 | 99.52 |
| scaffold00522 | 24250  | 30472  | 6223  | 4.09  | C_unshiu_00751 | 112646 | 106424 | 6223  | 4.57  | 100   |
| scaffold00522 | 36315  | 44906  | 8592  | 5.65  | C_unshiu_00751 | 101057 | 92452  | 8606  | 6.32  | 99.73 |
| scaffold00522 | 46638  | 54110  | 7473  | 4.91  | C_unshiu_00751 | 91334  | 83861  | 7474  | 5.49  | 99.81 |
| scaffold00522 | 54368  | 62530  | 8163  | 5.37  | C_unshiu_00751 | 83636  | 75460  | 8177  | 6     | 99.28 |
| scaffold00522 | 62528  | 92716  | 30189 | 19.84 | C_unshiu_00751 | 75405  | 45270  | 30136 | 22.12 | 99.18 |
| scaffold00522 | 101865 | 110049 | 8185  | 5.38  | C_unshiu_00751 | 37054  | 28855  | 8200  | 6.02  | 99.01 |
| scaffold00522 | 103343 | 110411 | 7069  | 4.65  | C_unshiu_01900 | 10218  | 17280  | 7063  | 15.8  | 99.29 |
| scaffold00522 | 111062 | 113369 | 2308  | 1.52  | C_unshiu_01900 | 17442  | 19742  | 2301  | 5.15  | 98.62 |
| scaffold00522 | 111236 | 113543 | 2308  | 1.52  | C_unshiu_00751 | 30071  | 27764  | 2308  | 1.69  | 99.18 |
| scaffold00522 | 114374 | 118513 | 4140  | 2.72  | C_unshiu_01900 | 19744  | 23879  | 4136  | 9.25  | 99.03 |
| scaffold00522 | 118513 | 120169 | 1657  | 1.09  | C_unshiu_00435 | 201282 | 202938 | 1657  | 0.78  | 100   |
| scaffold00522 | 120169 | 126310 | 6142  | 4.04  | C_unshiu_00751 | 22123  | 16004  | 6120  | 4.49  | 99.03 |
| scaffold00522 | 128770 | 130310 | 1541  | 1.01  | C_unshiu_00751 | 12475  | 10935  | 1541  | 1.13  | 100   |
| scaffold00522 | 130347 | 136145 | 5799  | 3.81  | C_unshiu_00948 | 92517  | 86719  | 5799  | 5.19  | 100   |
| scaffold00522 | 136142 | 139700 | 3559  | 2.34  | C_unshiu_00751 | 6828   | 3270   | 3559  | 2.61  | 99.89 |
| scaffold00522 | 139819 | 141973 | 2155  | 1.42  | C_unshiu_00751 | 2988   | 835    | 2154  | 1.58  | 99.91 |
| scaffold00523 | 2625   | 7959   | 5335  | 3.51  | C_unshiu_00883 | 57047  | 62391  | 5345  | 4.49  | 98.62 |
| scaffold00523 | 16558  | 22356  | 5799  | 3.81  | C_unshiu_00883 | 71056  | 76846  | 5791  | 4.87  | 98.79 |
| scaffold00523 | 25041  | 32076  | 7036  | 4.62  | C_unshiu_00883 | 91136  | 98141  | 7006  | 5.89  | 98.54 |
| scaffold00523 | 33285  | 39912  | 6628  | 4.36  | C_unshiu_00883 | 98202  | 104837 | 6636  | 5.58  | 98.66 |
| scaffold00523 | 38578  | 40025  | 1448  | 0.95  | C_unshiu_00883 | 118955 | 117507 | 1449  | 1.22  | 98.14 |
| scaffold00523 | 40744  | 44059  | 3316  | 2.18  | C_unshiu_01889 | 35053  | 38366  | 3314  | 7.36  | 99.64 |
| scaffold00523 | 58226  | 65460  | 7235  | 4.75  | C_unshiu_00826 | 67111  | 74338  | 7228  | 5.76  | 99.53 |
| scaffold00523 | 82313  | 100783 | 18471 | 12.14 | C_unshiu_00826 | 80322  | 98909  | 18588 | 14.81 | 98.27 |
| scaffold00523 | 100109 | 103242 | 3134  | 2.06  | C_unshiu_03074 | 10326  | 7193   | 3134  | 30.35 | 100   |
| scaffold00523 | 103797 | 109892 | 6096  | 4.01  | C_unshiu_03074 | 6096   | 1      | 6096  | 59.04 | 99.97 |
| scaffold00523 | 121920 | 132710 | 10791 | 7.09  | C_unshiu_01523 | 110    | 10921  | 10812 | 17.44 | 99.03 |
| scaffold00523 | 132724 | 134010 | 1287  | 0.85  | C_unshiu_01523 | 11917  | 13203  | 1287  | 2.08  | 99.84 |
| scaffold00523 | 135512 | 140329 | 4818  | 3.17  | C_unshiu_01687 | 15876  | 20693  | 4818  | 9.06  | 99.98 |
| scaffold00523 | 140330 | 143670 | 3341  | 2.2   | C_unshiu_01523 | 19179  | 22525  | 3347  | 5.4   | 99.37 |
| scaffold00525 | 1802   | 2990   | 1189  | 0.79  | C_unshiu_00673 | 34616  | 33428  | 1189  | 0.79  | 100   |
| scaffold00525 | 2985   | 18905  | 15921 | 10.59 | C_unshiu_00601 | 130349 | 146269 | 15921 | 9.5   | 99.95 |
| scaffold00525 | 21008  | 25374  | 4367  | 2.91  | C_unshiu_00601 | 148847 | 153194 | 4348  | 2.59  | 98.54 |
| scaffold00525 | 25437  | 30995  | 5559  | 3.7   | C_unshiu_00601 | 153283 | 158841 | 5559  | 3.32  | 100   |
| scaffold00525 | 30984  | 33195  | 2212  | 1.47  | C_unshiu_00735 | 32308  | 34518  | 2211  | 1.6   | 99.95 |

|               |        |        |       |       |                |        |        |       |       |       |
|---------------|--------|--------|-------|-------|----------------|--------|--------|-------|-------|-------|
| scaffold00525 | 34498  | 36806  | 2309  | 1.54  | C_unshiu_01957 | 41120  | 38804  | 2317  | 5.46  | 99.09 |
| scaffold00525 | 42572  | 46291  | 3720  | 2.47  | C_unshiu_00821 | 88433  | 84714  | 3720  | 2.95  | 100   |
| scaffold00525 | 48370  | 53492  | 5123  | 3.41  | C_unshiu_01957 | 31667  | 26535  | 5133  | 12.09 | 99.03 |
| scaffold00525 | 53493  | 72277  | 18785 | 12.5  | C_unshiu_01957 | 26185  | 7385   | 18801 | 44.29 | 98.38 |
| scaffold00525 | 99409  | 108718 | 9310  | 6.19  | C_unshiu_01302 | 37225  | 46545  | 9321  | 12.06 | 98.45 |
| scaffold00525 | 114131 | 121349 | 7219  | 4.8   | C_unshiu_01302 | 51274  | 58509  | 7236  | 9.36  | 98.5  |
| scaffold00526 | 1      | 1112   | 1112  | 0.74  | C_unshiu_01969 | 36142  | 35032  | 1111  | 2.66  | 98.92 |
| scaffold00526 | 16826  | 17881  | 1056  | 0.7   | C_unshiu_00333 | 73238  | 74292  | 1055  | 0.42  | 98.2  |
| scaffold00526 | 31206  | 32348  | 1143  | 0.76  | C_unshiu_01199 | 38661  | 37524  | 1138  | 1.33  | 98.78 |
| scaffold00526 | 40756  | 42536  | 1781  | 1.19  | C_unshiu_02492 | 21749  | 23528  | 1780  | 7.19  | 99.83 |
| scaffold00526 | 44678  | 53325  | 8648  | 5.77  | C_unshiu_01199 | 31827  | 23196  | 8632  | 10.06 | 98.12 |
| scaffold00526 | 59021  | 115970 | 56950 | 38    | C_unshiu_00769 | 130191 | 73244  | 56948 | 42.75 | 99.93 |
| scaffold00526 | 117398 | 119044 | 1647  | 1.1   | C_unshiu_00769 | 72423  | 70788  | 1636  | 1.23  | 98.07 |
| scaffold00526 | 119053 | 125567 | 6515  | 4.35  | C_unshiu_00769 | 70907  | 64393  | 6515  | 4.89  | 100   |
| scaffold00526 | 133513 | 135268 | 1756  | 1.17  | C_unshiu_00364 | 158244 | 156489 | 1756  | 0.75  | 100   |
| scaffold00529 | 6620   | 36014  | 29395 | 19.78 | C_unshiu_00592 | 36851  | 7478   | 29374 | 17.38 | 99.89 |
| scaffold00529 | 36482  | 43945  | 7464  | 5.02  | C_unshiu_00592 | 7466   | 3      | 7464  | 4.42  | 100   |
| scaffold00529 | 44961  | 46450  | 1490  | 1     | C_unshiu_01632 | 53733  | 52242  | 1492  | 2.67  | 98.86 |
| scaffold00529 | 54027  | 71220  | 17194 | 11.57 | C_unshiu_01632 | 52280  | 35095  | 17186 | 30.75 | 99.88 |
| scaffold00529 | 72614  | 84175  | 11562 | 7.78  | C_unshiu_01359 | 15715  | 4149   | 11567 | 15.72 | 99.55 |
| scaffold00529 | 98696  | 118182 | 19487 | 13.11 | C_unshiu_01046 | 830    | 20313  | 19484 | 19.27 | 99.9  |
| scaffold00529 | 118047 | 140725 | 22679 | 15.26 | C_unshiu_01046 | 20326  | 43004  | 22679 | 22.43 | 100   |
| scaffold00529 | 145732 | 148603 | 2872  | 1.93  | C_unshiu_01046 | 48331  | 51202  | 2872  | 2.84  | 100   |
| scaffold00530 | 3      | 12285  | 12283 | 8.27  | C_unshiu_00029 | 486182 | 498551 | 12370 | 1.73  | 98.43 |
| scaffold00530 | 29264  | 31276  | 2013  | 1.36  | C_unshiu_01934 | 28105  | 26093  | 2013  | 4.64  | 100   |
| scaffold00530 | 29267  | 31428  | 2162  | 1.46  | C_unshiu_00269 | 75983  | 78144  | 2162  | 0.77  | 100   |
| scaffold00530 | 31636  | 42579  | 10944 | 7.37  | C_unshiu_00029 | 508434 | 519383 | 10950 | 1.53  | 98.69 |
| scaffold00530 | 49247  | 69859  | 20613 | 13.88 | C_unshiu_00029 | 524869 | 545505 | 20637 | 2.88  | 99.09 |
| scaffold00530 | 61147  | 70917  | 9771  | 6.58  | C_unshiu_02928 | 411    | 10177  | 9767  | 64.79 | 98.85 |
| scaffold00530 | 71077  | 77341  | 6265  | 4.22  | C_unshiu_00029 | 548386 | 554567 | 6182  | 0.86  | 98.09 |
| scaffold00530 | 80114  | 103890 | 23777 | 16.01 | C_unshiu_00029 | 555917 | 579649 | 23733 | 3.31  | 98.3  |
| scaffold00530 | 106024 | 121661 | 15638 | 10.53 | C_unshiu_00029 | 580555 | 596162 | 15608 | 2.18  | 98.53 |
| scaffold00530 | 123404 | 148541 | 25138 | 16.92 | C_unshiu_00029 | 596865 | 622041 | 25177 | 3.51  | 99.37 |
| scaffold00531 | 2393   | 59334  | 56942 | 38.43 | C_unshiu_00280 | 127470 | 184403 | 56934 | 20.57 | 99.97 |
| scaffold00531 | 64746  | 65765  | 1020  | 0.69  | C_unshiu_00280 | 191616 | 192635 | 1020  | 0.37  | 100   |
| scaffold00531 | 66984  | 72019  | 5036  | 3.4   | C_unshiu_00280 | 193813 | 198848 | 5036  | 1.82  | 100   |
| scaffold00531 | 72085  | 89174  | 17090 | 11.53 | C_unshiu_00280 | 199304 | 216393 | 17090 | 6.17  | 100   |
| scaffold00531 | 89209  | 93199  | 3991  | 2.69  | C_unshiu_00280 | 216296 | 220294 | 3999  | 1.44  | 99.05 |
| scaffold00531 | 93227  | 95511  | 2285  | 1.54  | C_unshiu_00280 | 220182 | 222466 | 2285  | 0.83  | 100   |
| scaffold00531 | 95505  | 97274  | 1770  | 1.19  | C_unshiu_01113 | 52482  | 50713  | 1770  | 1.87  | 100   |
| scaffold00531 | 97275  | 148107 | 50833 | 34.31 | C_unshiu_00280 | 224718 | 275551 | 50834 | 18.37 | 99.98 |
| scaffold00532 | 1      | 4422   | 4422  | 2.98  | C_unshiu_00132 | 287980 | 292410 | 4431  | 1.08  | 98.97 |
| scaffold00532 | 4440   | 6220   | 1781  | 1.2   | C_unshiu_00132 | 292695 | 294482 | 1788  | 0.43  | 99.61 |
| scaffold00532 | 6649   | 9487   | 2839  | 1.92  | C_unshiu_00132 | 295187 | 298025 | 2839  | 0.69  | 99.89 |
| scaffold00532 | 10021  | 44858  | 34838 | 23.52 | C_unshiu_00132 | 299084 | 333930 | 34847 | 8.46  | 99.56 |
| scaffold00532 | 55866  | 70717  | 14852 | 10.03 | C_unshiu_00132 | 351905 | 366808 | 14904 | 3.62  | 98.86 |
| scaffold00532 | 82025  | 85150  | 3126  | 2.11  | C_unshiu_00132 | 378709 | 381835 | 3127  | 0.76  | 99.01 |
| scaffold00532 | 86776  | 115134 | 28359 | 19.14 | C_unshiu_00132 | 383530 | 411892 | 28363 | 6.89  | 99.98 |
| scaffold00533 | 2933   | 6320   | 3388  | 2.29  | C_unshiu_00460 | 1      | 3388   | 3388  | 1.65  | 99.85 |
| scaffold00533 | 7264   | 8471   | 1208  | 0.82  | C_unshiu_00460 | 4637   | 5844   | 1208  | 0.59  | 99.42 |
| scaffold00533 | 8488   | 10438  | 1951  | 1.32  | C_unshiu_00460 | 7440   | 9389   | 1950  | 0.95  | 99.74 |
| scaffold00533 | 10607  | 12731  | 2125  | 1.44  | C_unshiu_00460 | 9600   | 11727  | 2128  | 1.04  | 99.86 |
| scaffold00533 | 13703  | 19602  | 5900  | 3.99  | C_unshiu_00460 | 13168  | 19071  | 5904  | 2.88  | 98.57 |
| scaffold00533 | 20058  | 21497  | 1440  | 0.97  | C_unshiu_00460 | 19964  | 21403  | 1440  | 0.7   | 99.86 |
| scaffold00533 | 27754  | 42477  | 14724 | 9.96  | C_unshiu_00460 | 23376  | 38118  | 14743 | 7.2   | 98.9  |
| scaffold00533 | 43638  | 45897  | 2260  | 1.53  | C_unshiu_00460 | 38811  | 41070  | 2260  | 1.1   | 100   |
| scaffold00533 | 45920  | 49149  | 3230  | 2.19  | C_unshiu_00460 | 40948  | 44182  | 3235  | 1.58  | 99.85 |
| scaffold00533 | 50522  | 55366  | 4845  | 3.28  | C_unshiu_00460 | 46005  | 50849  | 4845  | 2.37  | 100   |
| scaffold00533 | 56442  | 58570  | 2129  | 1.44  | C_unshiu_00460 | 54261  | 56389  | 2129  | 1.04  | 100   |
| scaffold00533 | 61932  | 63336  | 1405  | 0.95  | C_unshiu_00460 | 59652  | 61055  | 1404  | 0.69  | 99.64 |
| scaffold00533 | 63464  | 65552  | 2089  | 1.41  | C_unshiu_00460 | 61424  | 63512  | 2089  | 1.02  | 99.81 |
| scaffold00533 | 65738  | 67026  | 1289  | 0.87  | C_unshiu_00460 | 63925  | 65213  | 1289  | 0.63  | 99.84 |
| scaffold00533 | 67124  | 68204  | 1081  | 0.73  | C_unshiu_00349 | 35507  | 34432  | 1076  | 0.44  | 98.06 |
| scaffold00533 | 67170  | 72359  | 5190  | 3.51  | C_unshiu_00460 | 65215  | 70403  | 5189  | 2.53  | 99.81 |
| scaffold00533 | 72059  | 74860  | 2802  | 1.9   | C_unshiu_00460 | 70240  | 73038  | 2799  | 1.37  | 99.11 |
| scaffold00533 | 84431  | 89855  | 5425  | 3.67  | C_unshiu_00460 | 78721  | 84152  | 5432  | 2.65  | 99.78 |
| scaffold00533 | 89122  | 92296  | 3175  | 2.15  | C_unshiu_00460 | 100173 | 103363 | 3191  | 1.56  | 98.84 |
| scaffold00533 | 92491  | 113001 | 20511 | 13.88 | C_unshiu_00460 | 103885 | 124350 | 20466 | 10    | 99.51 |
| scaffold00533 | 114465 | 117320 | 2856  | 1.93  | C_unshiu_00460 | 138124 | 140963 | 2840  | 1.39  | 98.43 |
| scaffold00533 | 117430 | 118549 | 1120  | 0.76  | C_unshiu_00460 | 141089 | 142208 | 1120  | 0.55  | 100   |
| scaffold00533 | 120765 | 122422 | 1658  | 1.12  | C_unshiu_00460 | 144801 | 146458 | 1658  | 0.81  | 100   |
| scaffold00533 | 123219 | 131308 | 8090  | 5.48  | C_unshiu_00460 | 147919 | 156021 | 8103  | 3.96  | 99.69 |
| scaffold00533 | 132523 | 135244 | 2722  | 1.84  | C_unshiu_00460 | 157631 | 160352 | 2722  | 1.33  | 100   |
| scaffold00533 | 136821 | 143009 | 6189  | 4.19  | C_unshiu_00460 | 162103 | 168291 | 6189  | 3.02  | 99.97 |
| scaffold00533 | 145316 | 146322 | 1007  | 0.68  | C_unshiu_00460 | 170734 | 171740 | 1007  | 0.49  | 100   |
| scaffold00535 | 13369  | 29348  | 15980 | 10.88 | C_unshiu_00145 | 252809 | 268787 | 15979 | 4.04  | 99.99 |
| scaffold00535 | 29603  | 33303  | 3701  | 2.52  | C_unshiu_00145 | 269441 | 273141 | 3701  | 0.94  | 99.97 |
| scaffold00535 | 35989  | 105088 | 69100 | 47.05 | C_unshiu_00145 | 276571 | 345662 | 69092 | 17.46 | 99.98 |
| scaffold00535 | 108378 | 146872 | 38495 | 26.21 | C_unshiu_00145 | 349192 | 387686 | 38495 | 9.73  | 99.99 |

|               |        |        |       |       |                |        |        |       |       |       |
|---------------|--------|--------|-------|-------|----------------|--------|--------|-------|-------|-------|
| scaffold00536 | 1      | 1284   | 1284  | 0.88  | C_unshiu_00625 | 51097  | 49813  | 1285  | 0.79  | 99.92 |
| scaffold00536 | 35670  | 38243  | 2574  | 1.76  | C_unshiu_00625 | 24007  | 21430  | 2578  | 1.59  | 99.38 |
| scaffold00536 | 39814  | 51655  | 11842 | 8.08  | C_unshiu_00625 | 20633  | 8802   | 11832 | 7.31  | 98.8  |
| scaffold00536 | 42180  | 56141  | 13962 | 9.53  | C_unshiu_00811 | 127287 | 113278 | 14010 | 11.01 | 98.35 |
| scaffold00536 | 57386  | 58497  | 1112  | 0.76  | C_unshiu_00811 | 111498 | 112609 | 1112  | 0.87  | 98.03 |
| scaffold00536 | 58498  | 68902  | 10405 | 7.1   | C_unshiu_00811 | 111010 | 100599 | 10412 | 8.18  | 98.87 |
| scaffold00536 | 77258  | 80595  | 3338  | 2.28  | C_unshiu_00811 | 92683  | 89334  | 3350  | 2.63  | 99.31 |
| scaffold00536 | 84688  | 94961  | 10274 | 7.01  | C_unshiu_00811 | 84262  | 73940  | 10323 | 8.11  | 98.84 |
| scaffold00536 | 112715 | 118482 | 5768  | 3.94  | C_unshiu_00811 | 66270  | 60500  | 5771  | 4.53  | 99.32 |
| scaffold00536 | 118503 | 120101 | 1599  | 1.09  | C_unshiu_00811 | 60371  | 58770  | 1602  | 1.26  | 98.81 |
| scaffold00536 | 120078 | 125897 | 5820  | 3.97  | C_unshiu_00811 | 58724  | 52848  | 5877  | 4.62  | 98.38 |
| scaffold00536 | 132029 | 138263 | 6235  | 4.26  | C_unshiu_00811 | 45848  | 39607  | 6242  | 4.9   | 99.78 |
| scaffold00536 | 138372 | 141793 | 3422  | 2.34  | C_unshiu_00811 | 39291  | 35869  | 3423  | 2.69  | 99.88 |
| scaffold00536 | 144008 | 146192 | 2185  | 1.49  | C_unshiu_00811 | 32809  | 30624  | 2186  | 1.72  | 99.68 |
| scaffold00537 | 14572  | 17672  | 3101  | 2.13  | C_unshiu_00684 | 105381 | 108496 | 3116  | 2.11  | 98.65 |
| scaffold00537 | 20339  | 21904  | 1566  | 1.08  | C_unshiu_00684 | 111680 | 113247 | 1568  | 1.06  | 98.92 |
| scaffold00537 | 21918  | 23217  | 1300  | 0.89  | C_unshiu_00684 | 115008 | 116307 | 1300  | 0.88  | 98.77 |
| scaffold00537 | 24584  | 25977  | 1394  | 0.96  | C_unshiu_00783 | 117996 | 119392 | 1397  | 1.07  | 98.28 |
| scaffold00537 | 26293  | 27820  | 1528  | 1.05  | C_unshiu_00684 | 119160 | 120689 | 1530  | 1.03  | 99.15 |
| scaffold00537 | 27884  | 35336  | 7453  | 5.12  | C_unshiu_00684 | 120795 | 128233 | 7439  | 5.03  | 98.53 |
| scaffold00537 | 35451  | 37938  | 2488  | 1.71  | C_unshiu_00416 | 204636 | 207103 | 2468  | 1.12  | 98.47 |
| scaffold00537 | 55957  | 60207  | 4251  | 2.92  | C_unshiu_00416 | 212509 | 216753 | 4245  | 1.93  | 98.78 |
| scaffold00537 | 60153  | 62898  | 2746  | 1.89  | C_unshiu_00416 | 216756 | 219499 | 2744  | 1.25  | 98.08 |
| scaffold00537 | 63484  | 75319  | 11836 | 8.13  | C_unshiu_00147 | 331278 | 319417 | 11862 | 3.04  | 98.3  |
| scaffold00537 | 83297  | 96104  | 12808 | 8.79  | C_unshiu_00147 | 312639 | 299778 | 12862 | 3.3   | 98.61 |
| scaffold00537 | 110155 | 136965 | 26811 | 18.41 | C_unshiu_00147 | 298565 | 271702 | 26864 | 6.89  | 99.66 |
| scaffold00537 | 137292 | 138872 | 1581  | 1.09  | C_unshiu_00147 | 270914 | 269331 | 1584  | 0.41  | 98.36 |
| scaffold00537 | 138647 | 140291 | 1645  | 1.13  | C_unshiu_00147 | 268904 | 267260 | 1645  | 0.42  | 99.64 |
| scaffold00537 | 140809 | 145666 | 4858  | 3.34  | C_unshiu_00147 | 267222 | 262389 | 4834  | 1.24  | 98.52 |
| scaffold00538 | 2249   | 15242  | 12994 | 8.93  | C_unshiu_02464 | 25703  | 12824  | 12880 | 50.11 | 98.65 |
| scaffold00538 | 15842  | 27623  | 11782 | 8.1   | C_unshiu_02464 | 11702  | 1      | 11702 | 45.53 | 98.89 |
| scaffold00538 | 30187  | 32893  | 2707  | 1.86  | C_unshiu_01484 | 45537  | 42831  | 2707  | 4.23  | 99.96 |
| scaffold00538 | 33258  | 59309  | 26052 | 17.91 | C_unshiu_00316 | 184208 | 158213 | 25996 | 10.07 | 98.87 |
| scaffold00538 | 66800  | 89583  | 22784 | 15.66 | C_unshiu_00316 | 151976 | 129172 | 22805 | 8.83  | 98.47 |
| scaffold00538 | 120464 | 122317 | 1854  | 1.27  | C_unshiu_01214 | 78584  | 76729  | 1856  | 2.21  | 99.84 |
| scaffold00538 | 120542 | 126094 | 5553  | 3.82  | C_unshiu_01214 | 78594  | 84116  | 5523  | 6.57  | 99.03 |
| scaffold00538 | 129713 | 135594 | 5882  | 4.04  | C_unshiu_00161 | 371969 | 366088 | 5882  | 1.58  | 99.46 |
| scaffold00538 | 135618 | 143426 | 7809  | 5.37  | C_unshiu_00161 | 365800 | 358010 | 7791  | 2.09  | 98.99 |
| scaffold00539 | 6969   | 25024  | 18056 | 12.41 | C_unshiu_02051 | 20479  | 38516  | 18038 | 46.71 | 99.83 |
| scaffold00539 | 35226  | 48018  | 12793 | 8.79  | C_unshiu_01546 | 59531  | 46736  | 12796 | 21.06 | 98.92 |
| scaffold00539 | 48034  | 49954  | 1921  | 1.32  | C_unshiu_00631 | 111975 | 110072 | 1904  | 1.19  | 98.96 |
| scaffold00539 | 49201  | 69611  | 20411 | 14.03 | C_unshiu_01546 | 46799  | 26393  | 20407 | 33.58 | 99.4  |
| scaffold00539 | 57208  | 69681  | 12474 | 8.58  | C_unshiu_01546 | 38767  | 26323  | 12445 | 20.48 | 99.68 |
| scaffold00539 | 70404  | 75356  | 4953  | 3.4   | C_unshiu_01546 | 25117  | 20166  | 4952  | 8.15  | 99.86 |
| scaffold00539 | 75355  | 76663  | 1309  | 0.9   | C_unshiu_01953 | 26595  | 25287  | 1309  | 3.08  | 100   |
| scaffold00539 | 77916  | 80215  | 2300  | 1.58  | C_unshiu_02222 | 2174   | 4475   | 2302  | 7.08  | 99.3  |
| scaffold00539 | 89775  | 91713  | 1939  | 1.33  | C_unshiu_01546 | 7784   | 5846   | 1939  | 3.19  | 99.74 |
| scaffold00539 | 91236  | 95221  | 3986  | 2.74  | C_unshiu_01546 | 3986   | 1      | 3986  | 6.56  | 99.85 |
| scaffold00539 | 94155  | 95512  | 1358  | 0.93  | C_unshiu_01398 | 67522  | 66165  | 1358  | 1.93  | 100   |
| scaffold00539 | 99870  | 103406 | 3537  | 2.43  | C_unshiu_01398 | 58328  | 54792  | 3537  | 5.02  | 100   |
| scaffold00539 | 104683 | 107172 | 2490  | 1.71  | C_unshiu_01054 | 81424  | 78935  | 2490  | 2.5   | 100   |
| scaffold00539 | 111716 | 114554 | 2839  | 1.95  | C_unshiu_01398 | 49388  | 46545  | 2844  | 4.04  | 99.02 |
| scaffold00539 | 115243 | 132076 | 16834 | 11.57 | C_unshiu_01054 | 70328  | 53509  | 16820 | 16.86 | 99.41 |
| scaffold00539 | 137938 | 139874 | 1937  | 1.33  | C_unshiu_02235 | 21896  | 23830  | 1935  | 6.03  | 99.02 |
| scaffold00540 | 1      | 1960   | 1960  | 1.35  | C_unshiu_01008 | 40374  | 38416  | 1959  | 1.86  | 99.13 |
| scaffold00540 | 10614  | 11627  | 1014  | 0.7   | C_unshiu_01149 | 15017  | 16026  | 1010  | 1.11  | 98.23 |
| scaffold00540 | 21044  | 25573  | 4530  | 3.11  | C_unshiu_01008 | 104432 | 99899  | 4534  | 4.32  | 99.27 |
| scaffold00540 | 25881  | 27506  | 1626  | 1.12  | C_unshiu_01008 | 99213  | 97588  | 1626  | 1.55  | 98.89 |
| scaffold00540 | 27768  | 29406  | 1639  | 1.13  | C_unshiu_01008 | 96870  | 95232  | 1639  | 1.56  | 99.69 |
| scaffold00540 | 31169  | 38570  | 7402  | 5.09  | C_unshiu_01008 | 92779  | 85432  | 7348  | 6.99  | 98.37 |
| scaffold00540 | 39312  | 47684  | 8373  | 5.76  | C_unshiu_01008 | 83834  | 75429  | 8406  | 8     | 99.32 |
| scaffold00540 | 52401  | 58893  | 6493  | 4.46  | C_unshiu_01008 | 71473  | 64981  | 6493  | 6.18  | 99.46 |
| scaffold00540 | 59735  | 70772  | 11038 | 7.59  | C_unshiu_01008 | 63732  | 52695  | 11038 | 10.51 | 100   |
| scaffold00540 | 71915  | 73345  | 1431  | 0.98  | C_unshiu_01008 | 51554  | 50124  | 1431  | 1.36  | 100   |
| scaffold00540 | 74736  | 76668  | 1933  | 1.33  | C_unshiu_01008 | 48311  | 46379  | 1933  | 1.84  | 100   |
| scaffold00540 | 89272  | 91233  | 1962  | 1.35  | C_unshiu_02526 | 14768  | 12807  | 1962  | 8.2   | 100   |
| scaffold00540 | 92316  | 103481 | 11166 | 7.68  | C_unshiu_02526 | 11166  | 1      | 11166 | 46.67 | 99.97 |
| scaffold00540 | 105971 | 111158 | 5188  | 3.57  | C_unshiu_02526 | 21965  | 16777  | 5189  | 21.69 | 99.98 |
| scaffold00540 | 130592 | 131819 | 1228  | 0.84  | C_unshiu_00054 | 507257 | 508484 | 1228  | 0.21  | 100   |
| scaffold00540 | 133642 | 135362 | 1721  | 1.18  | C_unshiu_00054 | 510840 | 512560 | 1721  | 0.29  | 99.54 |
| scaffold00540 | 139491 | 141756 | 2266  | 1.56  | C_unshiu_00054 | 516727 | 518998 | 2272  | 0.38  | 99.74 |
| scaffold00541 | 4638   | 14235  | 9598  | 6.62  | C_unshiu_02131 | 14379  | 23927  | 9549  | 26.84 | 98.49 |
| scaffold00541 | 14737  | 28753  | 14017 | 9.67  | C_unshiu_01677 | 30104  | 16033  | 14072 | 26.2  | 98.76 |
| scaffold00541 | 45223  | 64667  | 19445 | 13.41 | C_unshiu_00239 | 281323 | 261845 | 19479 | 6.43  | 99.12 |
| scaffold00541 | 65913  | 67051  | 1139  | 0.79  | C_unshiu_00128 | 160326 | 161464 | 1139  | 0.28  | 99.65 |
| scaffold00541 | 68278  | 73032  | 4755  | 3.28  | C_unshiu_00128 | 163055 | 167783 | 4729  | 1.14  | 98.19 |
| scaffold00541 | 80808  | 84810  | 4003  | 2.76  | C_unshiu_00128 | 177883 | 181888 | 4006  | 0.97  | 99.73 |
| scaffold00541 | 95091  | 97692  | 2602  | 1.79  | C_unshiu_00586 | 144883 | 147484 | 2602  | 1.53  | 100   |
| scaffold00541 | 104822 | 107608 | 2787  | 1.92  | C_unshiu_02887 | 15622  | 12859  | 2764  | 17.23 | 98.07 |

|               |        |        |       |       |                |        |        |       |       |       |
|---------------|--------|--------|-------|-------|----------------|--------|--------|-------|-------|-------|
| scaffold00541 | 107923 | 116000 | 8078  | 5.57  | C_unshiu_00565 | 55622  | 47569  | 8054  | 4.61  | 98.86 |
| scaffold00541 | 116450 | 131426 | 14977 | 10.33 | C_unshiu_00565 | 29300  | 14324  | 14977 | 8.57  | 99.87 |
| scaffold00541 | 137043 | 144969 | 7927  | 5.47  | C_unshiu_00565 | 8646   | 863    | 7784  | 4.45  | 98.01 |
| scaffold00542 | 12701  | 18614  | 5914  | 4.08  | C_unshiu_02483 | 19515  | 13600  | 5916  | 23.58 | 99.88 |
| scaffold00542 | 23722  | 61650  | 37929 | 26.19 | C_unshiu_02046 | 932    | 38889  | 37958 | 97.61 | 99.8  |
| scaffold00542 | 68632  | 74769  | 6138  | 4.24  | C_unshiu_01245 | 79261  | 73124  | 6138  | 7.54  | 99.98 |
| scaffold00542 | 74670  | 79773  | 5104  | 3.52  | C_unshiu_01245 | 73136  | 67982  | 5155  | 6.33  | 98.91 |
| scaffold00542 | 86536  | 88593  | 2058  | 1.42  | C_unshiu_01245 | 67069  | 65012  | 2058  | 2.53  | 99.51 |
| scaffold00542 | 89544  | 111674 | 22131 | 15.28 | C_unshiu_01245 | 63574  | 41435  | 22140 | 27.2  | 99.8  |
| scaffold00542 | 112161 | 134966 | 22806 | 15.75 | C_unshiu_01245 | 41506  | 18696  | 22811 | 28.02 | 99.97 |
| scaffold00542 | 135338 | 137876 | 2539  | 1.75  | C_unshiu_01245 | 18188  | 15650  | 2539  | 3.12  | 100   |
| scaffold00543 | 1      | 6877   | 6877  | 4.75  | C_unshiu_01828 | 398    | 7262   | 6865  | 14.47 | 99.75 |
| scaffold00543 | 6998   | 10243  | 3246  | 2.24  | C_unshiu_01828 | 7342   | 10547  | 3206  | 6.76  | 98.28 |
| scaffold00543 | 11144  | 26197  | 15054 | 10.4  | C_unshiu_01828 | 11909  | 26962  | 15054 | 31.73 | 99.97 |
| scaffold00543 | 26215  | 28122  | 1908  | 1.32  | C_unshiu_01828 | 27940  | 29847  | 1908  | 4.02  | 100   |
| scaffold00543 | 28711  | 40840  | 12130 | 8.38  | C_unshiu_01828 | 30557  | 42707  | 12151 | 25.61 | 99.42 |
| scaffold00543 | 43278  | 44983  | 1706  | 1.18  | C_unshiu_02409 | 25437  | 27142  | 1706  | 6.29  | 98.83 |
| scaffold00543 | 59780  | 61492  | 1713  | 1.18  | C_unshiu_01063 | 1713   | 1      | 1713  | 1.73  | 99.42 |
| scaffold00543 | 77058  | 92000  | 14943 | 10.32 | C_unshiu_01713 | 30297  | 15361  | 14937 | 28.75 | 98.78 |
| scaffold00543 | 86417  | 98073  | 11657 | 8.05  | C_unshiu_01392 | 66794  | 55115  | 11680 | 16.47 | 98.37 |
| scaffold00543 | 99723  | 109064 | 9342  | 6.45  | C_unshiu_01713 | 9988   | 643    | 9346  | 17.99 | 98.92 |
| scaffold00543 | 131677 | 140582 | 8906  | 6.15  | C_unshiu_01815 | 47973  | 39128  | 8846  | 18.44 | 98.54 |
| scaffold00543 | 142913 | 144531 | 1619  | 1.12  | C_unshiu_01815 | 36748  | 35130  | 1619  | 3.37  | 99.88 |
| scaffold00544 | 8      | 1885   | 1878  | 1.31  | C_unshiu_00269 | 69365  | 71240  | 1876  | 0.67  | 99.73 |
| scaffold00544 | 4395   | 5467   | 1073  | 0.75  | C_unshiu_00269 | 74011  | 75083  | 1073  | 0.38  | 99.91 |
| scaffold00544 | 5748   | 6773   | 1026  | 0.71  | C_unshiu_00269 | 72017  | 73043  | 1027  | 0.36  | 99.51 |
| scaffold00544 | 19755  | 23751  | 3997  | 2.78  | C_unshiu_00151 | 268629 | 264620 | 4010  | 1.04  | 99.05 |
| scaffold00544 | 23996  | 28396  | 4401  | 3.06  | C_unshiu_00151 | 264183 | 259792 | 4392  | 1.14  | 98.05 |
| scaffold00544 | 28093  | 30860  | 2768  | 1.92  | C_unshiu_02832 | 14308  | 17086  | 2779  | 16.26 | 98.56 |
| scaffold00544 | 34657  | 36021  | 1365  | 0.95  | C_unshiu_02832 | 5389   | 4025   | 1365  | 7.99  | 98.24 |
| scaffold00544 | 37701  | 39571  | 1871  | 1.3   | C_unshiu_00128 | 316329 | 318199 | 1871  | 0.45  | 100   |
| scaffold00544 | 39570  | 43930  | 4361  | 3.03  | C_unshiu_00151 | 242015 | 237718 | 4298  | 1.11  | 98.42 |
| scaffold00544 | 45066  | 47322  | 2257  | 1.57  | C_unshiu_00151 | 232137 | 229880 | 2258  | 0.59  | 99.51 |
| scaffold00544 | 46594  | 49830  | 3237  | 2.25  | C_unshiu_00151 | 236221 | 232979 | 3243  | 0.84  | 98.52 |
| scaffold00544 | 52013  | 55269  | 3257  | 2.26  | C_unshiu_02832 | 3272   | 1      | 3272  | 19.15 | 98.84 |
| scaffold00544 | 69875  | 73975  | 4101  | 2.85  | C_unshiu_01446 | 7203   | 11300  | 4098  | 6.13  | 98.54 |
| scaffold00544 | 77523  | 80867  | 3345  | 2.33  | C_unshiu_01446 | 17032  | 20377  | 3346  | 5     | 99.88 |
| scaffold00544 | 81778  | 86839  | 5062  | 3.52  | C_unshiu_01446 | 20177  | 25248  | 5072  | 7.58  | 99.03 |
| scaffold00544 | 88864  | 93134  | 4271  | 2.97  | C_unshiu_00972 | 106343 | 102074 | 4270  | 3.91  | 99.77 |
| scaffold00544 | 93180  | 94333  | 1154  | 0.8   | C_unshiu_01446 | 26393  | 27546  | 1154  | 1.73  | 99.22 |
| scaffold00544 | 93508  | 95254  | 1747  | 1.21  | C_unshiu_00972 | 101584 | 99838  | 1747  | 1.6   | 99.89 |
| scaffold00544 | 99464  | 118717 | 19254 | 13.39 | C_unshiu_00972 | 91188  | 71924  | 19265 | 17.62 | 98.89 |
| scaffold00544 | 119183 | 124513 | 5331  | 3.71  | C_unshiu_01446 | 38550  | 43860  | 5311  | 7.94  | 98.91 |
| scaffold00544 | 125869 | 128285 | 2417  | 1.68  | C_unshiu_01446 | 46284  | 48707  | 2424  | 3.62  | 98.11 |
| scaffold00545 | 1067   | 4603   | 3537  | 2.47  | C_unshiu_00188 | 322534 | 326070 | 3537  | 1.02  | 100   |
| scaffold00545 | 7202   | 8666   | 1465  | 1.02  | C_unshiu_00325 | 57735  | 59202  | 1468  | 0.58  | 98.98 |
| scaffold00545 | 15954  | 17904  | 1951  | 1.36  | C_unshiu_00325 | 65744  | 67693  | 1950  | 0.77  | 98.46 |
| scaffold00545 | 18800  | 35090  | 16291 | 11.38 | C_unshiu_00325 | 69448  | 85769  | 16322 | 6.41  | 98.79 |
| scaffold00545 | 37016  | 69654  | 32639 | 22.81 | C_unshiu_00325 | 86658  | 119284 | 32627 | 12.81 | 99.42 |
| scaffold00545 | 94105  | 114357 | 20253 | 14.15 | C_unshiu_00325 | 146267 | 166563 | 20297 | 7.97  | 99.35 |
| scaffold00545 | 114379 | 117281 | 2903  | 2.03  | C_unshiu_00325 | 167754 | 170681 | 2928  | 1.15  | 98.26 |
| scaffold00546 | 14889  | 16211  | 1323  | 0.93  | C_unshiu_03067 | 6069   | 4747   | 1323  | 12.41 | 98.49 |
| scaffold00546 | 36466  | 78432  | 41967 | 29.51 | C_unshiu_01575 | 14316  | 56248  | 41933 | 71.23 | 99.73 |
| scaffold00546 | 78428  | 79595  | 1168  | 0.82  | C_unshiu_01575 | 56790  | 57957  | 1168  | 1.98  | 98.97 |
| scaffold00546 | 82138  | 83370  | 1233  | 0.87  | C_unshiu_00582 | 37488  | 38719  | 1232  | 0.72  | 99.11 |
| scaffold00546 | 98509  | 102999 | 4491  | 3.16  | C_unshiu_01578 | 50251  | 45771  | 4481  | 7.63  | 99.29 |
| scaffold00546 | 106835 | 108795 | 1961  | 1.38  | C_unshiu_02003 | 6705   | 8663   | 1959  | 4.83  | 99.49 |
| scaffold00546 | 110358 | 121081 | 10724 | 7.54  | C_unshiu_02003 | 10566  | 21270  | 10705 | 26.41 | 99.4  |
| scaffold00546 | 121168 | 135481 | 14314 | 10.06 | C_unshiu_02003 | 21365  | 35695  | 14331 | 35.35 | 99.78 |
| scaffold00547 | 21375  | 29084  | 7710  | 5.43  | C_unshiu_00431 | 89021  | 81302  | 7720  | 3.6   | 99.81 |
| scaffold00547 | 30182  | 33856  | 3675  | 2.59  | C_unshiu_00431 | 79818  | 76144  | 3675  | 1.71  | 99.86 |
| scaffold00547 | 35725  | 43296  | 7572  | 5.34  | C_unshiu_00431 | 75013  | 67431  | 7583  | 3.53  | 99.45 |
| scaffold00547 | 73723  | 75537  | 1815  | 1.28  | C_unshiu_00431 | 37038  | 35222  | 1817  | 0.85  | 99.61 |
| scaffold00547 | 75559  | 81429  | 5871  | 4.14  | C_unshiu_00431 | 34297  | 28427  | 5871  | 2.74  | 99.98 |
| scaffold00547 | 111489 | 113448 | 1960  | 1.38  | C_unshiu_00251 | 19385  | 17423  | 1963  | 0.66  | 99.8  |
| scaffold00547 | 122319 | 130901 | 8583  | 6.05  | C_unshiu_00753 | 38823  | 47437  | 8615  | 6.35  | 98.27 |
| scaffold00548 | 2342   | 3706   | 1365  | 0.96  | C_unshiu_03032 | 391    | 1752   | 1362  | 11.33 | 98.98 |
| scaffold00548 | 3707   | 4808   | 1102  | 0.78  | C_unshiu_02057 | 15720  | 16821  | 1102  | 2.87  | 98.46 |
| scaffold00548 | 6238   | 7766   | 1529  | 1.08  | C_unshiu_03032 | 1336   | 2858   | 1523  | 12.67 | 98.76 |
| scaffold00548 | 7784   | 12337  | 4554  | 3.21  | C_unshiu_03032 | 3384   | 7905   | 4522  | 37.6  | 99.14 |
| scaffold00548 | 16891  | 18229  | 1339  | 0.94  | C_unshiu_00709 | 25166  | 23828  | 1339  | 0.94  | 98.58 |
| scaffold00548 | 20787  | 37706  | 16920 | 11.92 | C_unshiu_00709 | 142730 | 125792 | 16939 | 11.87 | 98.85 |
| scaffold00548 | 40758  | 54667  | 13910 | 9.8   | C_unshiu_01213 | 38941  | 25025  | 13917 | 16.54 | 99.44 |
| scaffold00548 | 55021  | 57119  | 2099  | 1.48  | C_unshiu_00709 | 102049 | 99963  | 2087  | 1.46  | 98.14 |
| scaffold00548 | 57375  | 73907  | 16533 | 11.65 | C_unshiu_01213 | 21153  | 4620   | 16534 | 19.65 | 99.8  |
| scaffold00548 | 73217  | 77288  | 4072  | 2.87  | C_unshiu_01213 | 5011   | 956    | 4056  | 4.82  | 98.65 |
| scaffold00548 | 107191 | 110374 | 3184  | 2.24  | C_unshiu_01767 | 30433  | 27250  | 3184  | 6.4   | 99.97 |
| scaffold00548 | 110629 | 114611 | 3983  | 2.81  | C_unshiu_01767 | 26889  | 22904  | 3986  | 8.01  | 99.8  |
| scaffold00548 | 114615 | 115904 | 1290  | 0.91  | C_unshiu_01767 | 22808  | 21519  | 1290  | 2.59  | 99.84 |

|               |        |        |       |       |                |        |        |       |       |       |
|---------------|--------|--------|-------|-------|----------------|--------|--------|-------|-------|-------|
| scaffold00548 | 116092 | 120460 | 4369  | 3.08  | C_unshiu_01767 | 20864  | 16497  | 4368  | 8.78  | 99.89 |
| scaffold00548 | 121238 | 122353 | 1116  | 0.79  | C_unshiu_00709 | 46323  | 45208  | 1116  | 0.78  | 99.82 |
| scaffold00548 | 122486 | 133105 | 10620 | 7.48  | C_unshiu_00709 | 45035  | 34492  | 10544 | 7.39  | 98.99 |
| scaffold00548 | 133657 | 139514 | 5858  | 4.13  | C_unshiu_00709 | 33487  | 27632  | 5856  | 4.1   | 99.78 |
| scaffold00549 | 6518   | 8599   | 2082  | 1.47  | C_unshiu_00637 | 39182  | 41263  | 2082  | 1.3   | 100   |
| scaffold00549 | 10389  | 17045  | 6657  | 4.69  | C_unshiu_00637 | 43538  | 50196  | 6659  | 4.17  | 99.95 |
| scaffold00549 | 30002  | 57465  | 27464 | 19.37 | C_unshiu_00791 | 118241 | 90638  | 27604 | 21.27 | 98.21 |
| scaffold00549 | 57729  | 68727  | 10999 | 7.76  | C_unshiu_00791 | 90421  | 79383  | 11039 | 8.51  | 98.93 |
| scaffold00549 | 68919  | 72245  | 3327  | 2.35  | C_unshiu_01499 | 23082  | 26409  | 3328  | 5.25  | 99.91 |
| scaffold00549 | 90416  | 96625  | 6210  | 4.38  | C_unshiu_00791 | 51462  | 45255  | 6208  | 4.78  | 99.76 |
| scaffold00549 | 97561  | 106463 | 8903  | 6.28  | C_unshiu_00791 | 43720  | 34856  | 8865  | 6.83  | 98.6  |
| scaffold00549 | 106464 | 123681 | 17218 | 12.14 | C_unshiu_00791 | 34682  | 17509  | 17174 | 13.23 | 99.03 |
| scaffold00551 | 4216   | 6270   | 2055  | 1.45  | C_unshiu_01587 | 22296  | 24350  | 2055  | 3.52  | 100   |
| scaffold00551 | 6377   | 12439  | 6063  | 4.29  | C_unshiu_00420 | 218976 | 212955 | 6022  | 2.75  | 98.96 |
| scaffold00551 | 14461  | 15731  | 1271  | 0.9   | C_unshiu_00420 | 210528 | 209258 | 1271  | 0.58  | 99.53 |
| scaffold00551 | 16496  | 17915  | 1420  | 1     | C_unshiu_00420 | 207860 | 206452 | 1409  | 0.64  | 99.01 |
| scaffold00551 | 21395  | 22518  | 1124  | 0.8   | C_unshiu_02494 | 5459   | 4336   | 1124  | 4.55  | 99.56 |
| scaffold00551 | 24934  | 27471  | 2538  | 1.8   | C_unshiu_00771 | 114937 | 112400 | 2538  | 1.91  | 100   |
| scaffold00551 | 30523  | 34710  | 4188  | 2.96  | C_unshiu_00596 | 152043 | 156229 | 4187  | 2.48  | 99.31 |
| scaffold00551 | 43430  | 61462  | 18033 | 12.76 | C_unshiu_01612 | 55908  | 37903  | 18006 | 31.59 | 99.68 |
| scaffold00551 | 92250  | 101112 | 8863  | 6.27  | C_unshiu_01285 | 24791  | 15928  | 8864  | 11.31 | 99.73 |
| scaffold00551 | 101129 | 103785 | 2657  | 1.88  | C_unshiu_01285 | 15775  | 13111  | 2665  | 3.4   | 98.72 |
| scaffold00551 | 103786 | 107078 | 3293  | 2.33  | C_unshiu_01285 | 12616  | 9333   | 3284  | 4.19  | 99.15 |
| scaffold00551 | 111668 | 120644 | 8977  | 6.35  | C_unshiu_01285 | 9069   | 75     | 8995  | 11.47 | 98.99 |
| scaffold00551 | 124274 | 125774 | 1501  | 1.06  | C_unshiu_00906 | 89808  | 88308  | 1501  | 1.29  | 100   |
| scaffold00551 | 127911 | 130149 | 2239  | 1.58  | C_unshiu_02221 | 11049  | 13285  | 2237  | 6.87  | 98.31 |
| scaffold00551 | 130160 | 134451 | 4292  | 3.04  | C_unshiu_02221 | 13734  | 18048  | 4315  | 13.25 | 98.5  |
| scaffold00552 | 16542  | 28895  | 12354 | 8.79  | C_unshiu_00947 | 111842 | 99483  | 12360 | 11.05 | 99.74 |
| scaffold00552 | 28898  | 30996  | 2099  | 1.49  | C_unshiu_00947 | 99010  | 96909  | 2102  | 1.88  | 99.67 |
| scaffold00552 | 32807  | 37845  | 5039  | 3.59  | C_unshiu_00947 | 94577  | 89533  | 5045  | 4.51  | 99.35 |
| scaffold00552 | 37451  | 71550  | 34100 | 24.27 | C_unshiu_00947 | 88957  | 54848  | 34110 | 30.5  | 99.85 |
| scaffold00552 | 90578  | 92671  | 2094  | 1.49  | C_unshiu_00948 | 52726  | 54818  | 2093  | 1.87  | 98.76 |
| scaffold00552 | 92715  | 94816  | 2102  | 1.5   | C_unshiu_00948 | 55108  | 57196  | 2089  | 1.87  | 99.38 |
| scaffold00552 | 94817  | 96760  | 1944  | 1.38  | C_unshiu_00104 | 345360 | 343417 | 1944  | 0.43  | 100   |
| scaffold00552 | 107444 | 108829 | 1386  | 0.99  | C_unshiu_00420 | 50413  | 49022  | 1392  | 0.64  | 99.21 |
| scaffold00552 | 108168 | 114542 | 6375  | 4.54  | C_unshiu_02552 | 23226  | 16873  | 6354  | 27.36 | 99.39 |
| scaffold00552 | 116936 | 119552 | 2617  | 1.86  | C_unshiu_02552 | 14145  | 11529  | 2617  | 11.27 | 100   |
| scaffold00552 | 123422 | 133307 | 9886  | 7.04  | C_unshiu_00488 | 181793 | 171908 | 9886  | 5.04  | 99.97 |
| scaffold00552 | 135775 | 137002 | 1228  | 0.87  | C_unshiu_00032 | 591115 | 589889 | 1227  | 0.17  | 99.02 |
| scaffold00552 | 138936 | 140296 | 1361  | 0.97  | C_unshiu_00032 | 588081 | 586722 | 1360  | 0.19  | 99.34 |
| scaffold00553 | 245    | 18905  | 18661 | 13.33 | C_unshiu_00716 | 22761  | 41402  | 18642 | 13.16 | 99.14 |
| scaffold00553 | 19218  | 43437  | 24220 | 17.3  | C_unshiu_00716 | 42352  | 66451  | 24100 | 17.02 | 98.87 |
| scaffold00553 | 44428  | 89210  | 44783 | 31.98 | C_unshiu_00716 | 66926  | 111708 | 44783 | 31.62 | 99.98 |
| scaffold00553 | 79175  | 102703 | 23529 | 16.8  | C_unshiu_00716 | 101673 | 125226 | 23554 | 16.63 | 99.5  |
| scaffold00553 | 91101  | 102705 | 11605 | 8.29  | C_unshiu_00716 | 113668 | 125228 | 11561 | 8.16  | 99.6  |
| scaffold00553 | 103364 | 111397 | 8034  | 5.74  | C_unshiu_00716 | 126373 | 134437 | 8065  | 5.69  | 98.49 |
| scaffold00553 | 117777 | 121858 | 4082  | 2.92  | C_unshiu_03115 | 1      | 4077   | 4077  | 47.2  | 98.8  |
| scaffold00553 | 124405 | 128439 | 4035  | 2.88  | C_unshiu_01963 | 1      | 4035   | 4035  | 9.59  | 99.23 |
| scaffold00553 | 137184 | 140018 | 2835  | 2.02  | C_unshiu_00468 | 201226 | 198392 | 2835  | 1.41  | 99.96 |
| scaffold00554 | 81     | 1260   | 1180  | 0.84  | C_unshiu_01796 | 25797  | 26976  | 1180  | 2.43  | 99.75 |
| scaffold00554 | 12665  | 18348  | 5684  | 4.07  | C_unshiu_01796 | 41567  | 47236  | 5670  | 11.68 | 99.65 |
| scaffold00554 | 21808  | 23057  | 1250  | 0.89  | C_unshiu_01680 | 39530  | 38281  | 1250  | 2.34  | 98.56 |
| scaffold00554 | 26747  | 36043  | 9297  | 6.65  | C_unshiu_01680 | 38267  | 28976  | 9292  | 17.37 | 98.72 |
| scaffold00554 | 49568  | 56911  | 7344  | 5.25  | C_unshiu_01680 | 17470  | 10127  | 7344  | 13.73 | 99.99 |
| scaffold00554 | 59132  | 64263  | 5132  | 3.67  | C_unshiu_01680 | 8781   | 3643   | 5139  | 9.6   | 99.4  |
| scaffold00554 | 69384  | 73740  | 4357  | 3.12  | C_unshiu_01870 | 38856  | 34502  | 4355  | 9.51  | 98.79 |
| scaffold00554 | 75145  | 76376  | 1232  | 0.88  | C_unshiu_01870 | 32436  | 31205  | 1232  | 2.69  | 100   |
| scaffold00554 | 77468  | 79437  | 1970  | 1.41  | C_unshiu_01433 | 24926  | 26895  | 1970  | 2.89  | 99.54 |
| scaffold00554 | 107995 | 110409 | 2415  | 1.73  | C_unshiu_01322 | 47207  | 44790  | 2418  | 3.21  | 98.8  |
| scaffold00554 | 110433 | 113889 | 3457  | 2.47  | C_unshiu_01322 | 44549  | 41102  | 3448  | 4.58  | 98.96 |
| scaffold00554 | 116663 | 121932 | 5270  | 3.77  | C_unshiu_01870 | 10147  | 4886   | 5262  | 11.5  | 98.7  |
| scaffold00554 | 123812 | 126892 | 3081  | 2.2   | C_unshiu_01870 | 3080   | 1      | 3080  | 6.73  | 99.06 |
| scaffold00555 | 579    | 1748   | 1170  | 0.84  | C_unshiu_00722 | 131481 | 130312 | 1170  | 0.83  | 100   |
| scaffold00555 | 1741   | 11438  | 9698  | 6.94  | C_unshiu_00094 | 380854 | 390556 | 9703  | 2.09  | 99.11 |
| scaffold00555 | 11910  | 46170  | 34261 | 24.53 | C_unshiu_00094 | 390838 | 425098 | 34261 | 7.37  | 99.97 |
| scaffold00555 | 46963  | 72502  | 25540 | 18.29 | C_unshiu_00094 | 426331 | 451870 | 25540 | 5.49  | 100   |
| scaffold00555 | 74681  | 77190  | 2510  | 1.8   | C_unshiu_00094 | 454714 | 457223 | 2510  | 0.54  | 100   |
| scaffold00555 | 78550  | 84144  | 5595  | 4.01  | C_unshiu_00094 | 459212 | 464809 | 5598  | 1.2   | 99.71 |
| scaffold00555 | 81265  | 115875 | 34611 | 24.78 | C_unshiu_00423 | 1      | 34623  | 34623 | 15.92 | 99.91 |
| scaffold00555 | 115947 | 137644 | 21698 | 15.54 | C_unshiu_00423 | 34969  | 56666  | 21698 | 9.97  | 100   |
| scaffold00556 | 1183   | 46264  | 45082 | 32.48 | C_unshiu_01473 | 621    | 45631  | 45011 | 69.34 | 98.94 |
| scaffold00556 | 44778  | 56983  | 12206 | 8.8   | C_unshiu_00632 | 46645  | 58890  | 12246 | 7.63  | 99.44 |
| scaffold00556 | 57288  | 58809  | 1522  | 1.1   | C_unshiu_00632 | 59579  | 61119  | 1541  | 0.96  | 98.12 |
| scaffold00556 | 59409  | 61081  | 1673  | 1.21  | C_unshiu_00632 | 63734  | 65406  | 1673  | 1.04  | 98.57 |
| scaffold00556 | 63475  | 67293  | 3819  | 2.75  | C_unshiu_00632 | 65079  | 68898  | 3820  | 2.38  | 99.82 |
| scaffold00556 | 73487  | 90020  | 16534 | 11.91 | C_unshiu_00632 | 74790  | 91401  | 16612 | 10.36 | 98.86 |
| scaffold00556 | 102941 | 104756 | 1816  | 1.31  | C_unshiu_00042 | 30513  | 28698  | 1816  | 0.28  | 100   |
| scaffold00556 | 107191 | 108590 | 1400  | 1.01  | C_unshiu_00632 | 105752 | 107151 | 1400  | 0.87  | 100   |
| scaffold00556 | 109184 | 110239 | 1056  | 0.76  | C_unshiu_00042 | 25249  | 24194  | 1056  | 0.16  | 100   |

|               |        |        |       |       |                |        |        |       |       |       |
|---------------|--------|--------|-------|-------|----------------|--------|--------|-------|-------|-------|
| scaffold00556 | 112027 | 114856 | 2830  | 2.04  | C_unshiu_00042 | 21875  | 19043  | 2833  | 0.44  | 98.45 |
| scaffold00556 | 115665 | 117751 | 2087  | 1.5   | C_unshiu_00042 | 18250  | 16160  | 2091  | 0.33  | 98.14 |
| scaffold00556 | 120338 | 131013 | 10676 | 7.69  | C_unshiu_00042 | 13109  | 2440   | 10670 | 1.67  | 99.94 |
| scaffold00557 | 13390  | 46100  | 32711 | 23.59 | C_unshiu_01477 | 39414  | 6681   | 32734 | 50.64 | 99.21 |
| scaffold00557 | 50859  | 66683  | 15825 | 11.41 | C_unshiu_00336 | 247084 | 231256 | 15829 | 6.33  | 99.96 |
| scaffold00557 | 66709  | 82196  | 15488 | 11.17 | C_unshiu_00654 | 72446  | 87976  | 15531 | 10.03 | 99.14 |
| scaffold00557 | 89817  | 95090  | 5274  | 3.8   | C_unshiu_00654 | 95945  | 101224 | 5280  | 3.41  | 98.85 |
| scaffold00557 | 95146  | 99919  | 4774  | 3.44  | C_unshiu_00654 | 101223 | 106008 | 4786  | 3.09  | 99.33 |
| scaffold00557 | 102989 | 108003 | 5015  | 3.62  | C_unshiu_00654 | 108443 | 113463 | 5021  | 3.24  | 99.46 |
| scaffold00557 | 102991 | 108006 | 5016  | 3.62  | C_unshiu_00384 | 176362 | 171365 | 4998  | 2.2   | 99.08 |
| scaffold00557 | 109246 | 128396 | 19151 | 13.81 | C_unshiu_00384 | 170917 | 151737 | 19181 | 8.44  | 99.78 |
| scaffold00557 | 129268 | 138681 | 9414  | 6.79  | C_unshiu_00384 | 150341 | 140911 | 9431  | 4.15  | 98.75 |
| scaffold00558 | 16341  | 23651  | 7311  | 5.28  | C_unshiu_00648 | 117562 | 110247 | 7316  | 4.65  | 98.66 |
| scaffold00558 | 69898  | 73340  | 3443  | 2.49  | C_unshiu_00030 | 271459 | 268005 | 3455  | 0.49  | 99.31 |
| scaffold00558 | 74760  | 86523  | 11764 | 8.49  | C_unshiu_00648 | 67856  | 56003  | 11854 | 7.54  | 98.77 |
| scaffold00558 | 90079  | 93217  | 3139  | 2.27  | C_unshiu_00648 | 51175  | 48036  | 3140  | 2     | 99.27 |
| scaffold00558 | 99362  | 102354 | 2993  | 2.16  | C_unshiu_00648 | 34995  | 32006  | 2990  | 1.9   | 98.24 |
| scaffold00558 | 106890 | 109332 | 2443  | 1.76  | C_unshiu_00648 | 26290  | 23818  | 2473  | 1.57  | 98.1  |
| scaffold00558 | 128620 | 134095 | 5476  | 3.95  | C_unshiu_00188 | 265529 | 271014 | 5486  | 1.59  | 99.36 |
| scaffold00558 | 135260 | 137099 | 1840  | 1.33  | C_unshiu_00188 | 272677 | 274515 | 1839  | 0.53  | 99.84 |
| scaffold00558 | 137059 | 138532 | 1474  | 1.06  | C_unshiu_00188 | 274560 | 276033 | 1474  | 0.43  | 99.93 |
| scaffold00559 | 4255   | 5330   | 1076  | 0.78  | C_unshiu_00903 | 69437  | 68362  | 1076  | 0.92  | 100   |
| scaffold00559 | 8204   | 33706  | 25503 | 18.42 | C_unshiu_00903 | 67566  | 42064  | 25503 | 21.88 | 99.99 |
| scaffold00559 | 33707  | 38493  | 4787  | 3.46  | C_unshiu_00368 | 14414  | 19200  | 4787  | 2.05  | 100   |
| scaffold00559 | 38489  | 42048  | 3560  | 2.57  | C_unshiu_00903 | 36990  | 33461  | 3530  | 3.03  | 99.02 |
| scaffold00559 | 50998  | 60807  | 9810  | 7.08  | C_unshiu_01983 | 22522  | 12713  | 9810  | 23.82 | 100   |
| scaffold00559 | 65093  | 71979  | 6887  | 4.97  | C_unshiu_01983 | 8965   | 2079   | 6887  | 16.73 | 100   |
| scaffold00559 | 78299  | 98231  | 19933 | 14.39 | C_unshiu_00419 | 106432 | 86584  | 19849 | 9.05  | 99.26 |
| scaffold00559 | 98252  | 103585 | 5334  | 3.85  | C_unshiu_00419 | 86214  | 80881  | 5334  | 2.43  | 99.94 |
| scaffold00559 | 103671 | 114747 | 11077 | 8     | C_unshiu_00419 | 80754  | 69676  | 11079 | 5.05  | 99.18 |
| scaffold00559 | 114828 | 132655 | 17828 | 12.87 | C_unshiu_00419 | 69116  | 51289  | 17828 | 8.13  | 99.98 |
| scaffold00559 | 132819 | 134849 | 2031  | 1.47  | C_unshiu_00419 | 50676  | 48647  | 2030  | 0.93  | 99.21 |
| scaffold00560 | 3061   | 4804   | 1744  | 1.26  | C_unshiu_01688 | 50004  | 48263  | 1742  | 3.29  | 99.31 |
| scaffold00560 | 5722   | 7026   | 1305  | 0.94  | C_unshiu_01688 | 26675  | 25371  | 1305  | 2.46  | 100   |
| scaffold00560 | 8213   | 10087  | 1875  | 1.36  | C_unshiu_01688 | 23355  | 21483  | 1873  | 3.53  | 99.89 |
| scaffold00560 | 10128  | 11896  | 1769  | 1.28  | C_unshiu_01688 | 21511  | 19743  | 1769  | 3.34  | 100   |
| scaffold00560 | 17998  | 19641  | 1644  | 1.19  | C_unshiu_01688 | 15549  | 13907  | 1643  | 3.1   | 99.57 |
| scaffold00560 | 31104  | 38841  | 7738  | 5.59  | C_unshiu_00810 | 19432  | 27169  | 7738  | 6.08  | 99.88 |
| scaffold00560 | 43839  | 47128  | 3290  | 2.38  | C_unshiu_00810 | 31579  | 34868  | 3290  | 2.58  | 99.85 |
| scaffold00560 | 47878  | 77658  | 29781 | 21.53 | C_unshiu_00810 | 36000  | 65741  | 29742 | 23.36 | 99.77 |
| scaffold00560 | 77257  | 89014  | 11758 | 8.5   | C_unshiu_00810 | 66780  | 78434  | 11655 | 9.15  | 98.37 |
| scaffold00560 | 95450  | 123974 | 28525 | 20.62 | C_unshiu_02165 | 30374  | 1843   | 28532 | 82.61 | 99.92 |
| scaffold00560 | 123970 | 125740 | 1771  | 1.28  | C_unshiu_02165 | 1      | 1779   | 1779  | 5.15  | 98.54 |
| scaffold00561 | 1      | 1423   | 1423  | 1.03  | C_unshiu_02782 | 15247  | 13825  | 1423  | 7.8   | 99.93 |
| scaffold00561 | 3914   | 6174   | 2261  | 1.64  | C_unshiu_00435 | 13467  | 11207  | 2261  | 1.06  | 99.82 |
| scaffold00561 | 9757   | 12987  | 3231  | 2.34  | C_unshiu_00435 | 8633   | 5403   | 3231  | 1.51  | 99.57 |
| scaffold00561 | 14760  | 17683  | 2924  | 2.12  | C_unshiu_00435 | 38930  | 36008  | 2923  | 1.37  | 99.97 |
| scaffold00561 | 17706  | 25354  | 7649  | 5.55  | C_unshiu_00435 | 35878  | 28228  | 7651  | 3.58  | 99.93 |
| scaffold00561 | 29283  | 34362  | 5080  | 3.69  | C_unshiu_00435 | 23878  | 18778  | 5101  | 2.39  | 99.24 |
| scaffold00561 | 37922  | 40561  | 2640  | 1.92  | C_unshiu_01747 | 33117  | 30478  | 2640  | 5.21  | 99.85 |
| scaffold00561 | 53781  | 57465  | 3685  | 2.67  | C_unshiu_00780 | 118660 | 114953 | 3708  | 2.83  | 98.68 |
| scaffold00561 | 57462  | 58619  | 1158  | 0.84  | C_unshiu_00780 | 114284 | 113124 | 1161  | 0.89  | 99.31 |
| scaffold00561 | 58816  | 66270  | 7455  | 5.41  | C_unshiu_00780 | 113395 | 105944 | 7452  | 5.68  | 99.26 |
| scaffold00561 | 66270  | 79546  | 13277 | 9.63  | C_unshiu_00780 | 105983 | 92693  | 13291 | 10.14 | 99.31 |
| scaffold00561 | 79546  | 87485  | 7940  | 5.76  | C_unshiu_00780 | 92217  | 84272  | 7946  | 6.06  | 99.75 |
| scaffold00561 | 97291  | 107269 | 9979  | 7.24  | C_unshiu_02228 | 17745  | 27730  | 9986  | 30.88 | 99.57 |
| scaffold00561 | 110266 | 114009 | 3744  | 2.72  | C_unshiu_00432 | 81480  | 77737  | 3744  | 1.75  | 99.65 |
| scaffold00561 | 114075 | 116234 | 2160  | 1.57  | C_unshiu_00432 | 85066  | 87225  | 2160  | 1.01  | 99.49 |
| scaffold00561 | 119864 | 124487 | 4624  | 3.35  | C_unshiu_00432 | 87622  | 92272  | 4651  | 2.17  | 98.01 |
| scaffold00561 | 134760 | 137852 | 3093  | 2.24  | C_unshiu_00272 | 110458 | 113550 | 3093  | 1.1   | 99.97 |
| scaffold00562 | 7098   | 8251   | 1154  | 0.84  | C_unshiu_01352 | 54428  | 55583  | 1156  | 1.56  | 99.48 |
| scaffold00562 | 7098   | 8251   | 1154  | 0.84  | C_unshiu_01490 | 527    | 1682   | 1156  | 1.81  | 99.74 |
| scaffold00562 | 11513  | 12643  | 1131  | 0.82  | C_unshiu_00673 | 125036 | 123906 | 1131  | 0.75  | 100   |
| scaffold00562 | 12636  | 20884  | 8249  | 6     | C_unshiu_01352 | 25853  | 17589  | 8265  | 11.19 | 99.4  |
| scaffold00562 | 22007  | 35529  | 13523 | 9.83  | C_unshiu_01352 | 16346  | 2918   | 13429 | 18.17 | 98.21 |
| scaffold00562 | 49676  | 52094  | 2419  | 1.76  | C_unshiu_00277 | 119255 | 116846 | 2410  | 0.87  | 99.34 |
| scaffold00562 | 56424  | 59521  | 3098  | 2.25  | C_unshiu_00277 | 113506 | 110430 | 3077  | 1.11  | 99.03 |
| scaffold00562 | 61205  | 64553  | 3349  | 2.43  | C_unshiu_00277 | 111186 | 107835 | 3352  | 1.2   | 99.49 |
| scaffold00562 | 74507  | 92743  | 18237 | 13.25 | C_unshiu_00277 | 108092 | 89848  | 18245 | 6.56  | 98.79 |
| scaffold00562 | 103990 | 105166 | 1177  | 0.86  | C_unshiu_00277 | 89848  | 88665  | 1184  | 0.43  | 99.16 |
| scaffold00562 | 107976 | 109193 | 1218  | 0.89  | C_unshiu_00277 | 85469  | 84252  | 1218  | 0.44  | 99.92 |
| scaffold00562 | 109188 | 115736 | 6549  | 4.76  | C_unshiu_00943 | 35952  | 42500  | 6549  | 5.84  | 100   |
| scaffold00562 | 115737 | 127570 | 11834 | 8.6   | C_unshiu_00277 | 77665  | 65844  | 11822 | 4.25  | 98.43 |
| scaffold00562 | 127571 | 129735 | 2165  | 1.57  | C_unshiu_00277 | 65561  | 63403  | 2159  | 0.78  | 99.26 |
| scaffold00563 | 1      | 1044   | 1044  | 0.76  | C_unshiu_00144 | 388389 | 389420 | 1032  | 0.26  | 98.75 |
| scaffold00563 | 1098   | 3489   | 2392  | 1.75  | C_unshiu_00144 | 389515 | 391880 | 2366  | 0.6   | 98.33 |
| scaffold00563 | 3610   | 4852   | 1243  | 0.91  | C_unshiu_00144 | 392046 | 393276 | 1231  | 0.31  | 99.03 |
| scaffold00563 | 9268   | 14427  | 5160  | 3.77  | C_unshiu_01753 | 3016   | 8175   | 5160  | 10.24 | 100   |
| scaffold00563 | 14420  | 16106  | 1687  | 1.23  | C_unshiu_02100 | 23774  | 22088  | 1687  | 4.62  | 100   |

|               |        |        |       |       |                |        |        |       |       |       |
|---------------|--------|--------|-------|-------|----------------|--------|--------|-------|-------|-------|
| scaffold00563 | 16107  | 27419  | 11313 | 8.26  | C_unshiu_00476 | 163537 | 174813 | 11277 | 5.64  | 99.3  |
| scaffold00563 | 29301  | 31140  | 1840  | 1.34  | C_unshiu_00476 | 187706 | 189545 | 1840  | 0.92  | 100   |
| scaffold00563 | 31798  | 32955  | 1158  | 0.85  | C_unshiu_00476 | 189573 | 190730 | 1158  | 0.58  | 99.74 |
| scaffold00563 | 35160  | 41189  | 6030  | 4.4   | C_unshiu_00476 | 193829 | 199849 | 6021  | 3.01  | 99.7  |
| scaffold00563 | 39603  | 41689  | 2087  | 1.52  | C_unshiu_01601 | 4849   | 6908   | 2060  | 3.58  | 98.28 |
| scaffold00563 | 41920  | 50671  | 8752  | 6.39  | C_unshiu_01601 | 7282   | 16012  | 8731  | 15.19 | 98.42 |
| scaffold00563 | 52163  | 54107  | 1945  | 1.42  | C_unshiu_01601 | 21364  | 23308  | 1945  | 3.38  | 98.56 |
| scaffold00563 | 85666  | 87470  | 1805  | 1.32  | C_unshiu_01802 | 1277   | 3082   | 1806  | 3.73  | 99.83 |
| scaffold00563 | 88988  | 99419  | 10432 | 7.62  | C_unshiu_01802 | 4825   | 15256  | 10432 | 21.54 | 99.8  |
| scaffold00563 | 99572  | 108146 | 8575  | 6.26  | C_unshiu_00476 | 134234 | 142798 | 8565  | 4.29  | 99.62 |
| scaffold00563 | 108159 | 119323 | 11165 | 8.16  | C_unshiu_00476 | 142669 | 153880 | 11212 | 5.61  | 98.46 |
| scaffold00563 | 122031 | 124596 | 2566  | 1.87  | C_unshiu_02864 | 12471  | 9908   | 2564  | 15.54 | 98.95 |
| scaffold00563 | 128562 | 130348 | 1787  | 1.31  | C_unshiu_01753 | 11467  | 13254  | 1788  | 3.55  | 99.94 |
| scaffold00563 | 131458 | 135214 | 3757  | 2.74  | C_unshiu_01753 | 14499  | 18253  | 3755  | 7.45  | 98.59 |
| scaffold00563 | 135220 | 136242 | 1023  | 0.75  | C_unshiu_01753 | 18214  | 19236  | 1023  | 2.03  | 100   |
| scaffold00565 | 1591   | 2899   | 1309  | 0.96  | C_unshiu_01400 | 32864  | 34172  | 1309  | 1.86  | 100   |
| scaffold00565 | 3573   | 18127  | 14555 | 10.72 | C_unshiu_01347 | 58660  | 44094  | 14567 | 19.62 | 99.59 |
| scaffold00565 | 22067  | 23685  | 1619  | 1.19  | C_unshiu_00344 | 49166  | 50784  | 1619  | 0.65  | 100   |
| scaffold00565 | 23688  | 28520  | 4833  | 3.56  | C_unshiu_01347 | 38266  | 33484  | 4783  | 6.44  | 98.76 |
| scaffold00565 | 76678  | 98515  | 21838 | 16.08 | C_unshiu_01100 | 49269  | 71211  | 21943 | 22.85 | 98.57 |
| scaffold00565 | 98555  | 104257 | 5703  | 4.2   | C_unshiu_01100 | 71210  | 76939  | 5730  | 5.97  | 98.08 |
| scaffold00565 | 107238 | 126510 | 19273 | 14.19 | C_unshiu_02345 | 3297   | 22550  | 19254 | 67.67 | 98.53 |
| scaffold00566 | 1      | 5276   | 5276  | 3.89  | C_unshiu_02975 | 10352  | 5077   | 5276  | 38.65 | 100   |
| scaffold00566 | 36288  | 56914  | 20627 | 15.21 | C_unshiu_01631 | 31279  | 51917  | 20639 | 36.92 | 99.55 |
| scaffold00566 | 54338  | 60378  | 6041  | 4.45  | C_unshiu_00078 | 1      | 6047   | 6047  | 1.21  | 99.64 |
| scaffold00566 | 61255  | 67529  | 6275  | 4.63  | C_unshiu_00078 | 6742   | 12994  | 6253  | 1.25  | 98.3  |
| scaffold00566 | 67529  | 69461  | 1933  | 1.43  | C_unshiu_00474 | 48783  | 50715  | 1933  | 0.96  | 100   |
| scaffold00566 | 69578  | 94031  | 24454 | 18.03 | C_unshiu_00078 | 14160  | 38663  | 24504 | 4.91  | 99.56 |
| scaffold00566 | 95245  | 96547  | 1303  | 0.96  | C_unshiu_00078 | 38585  | 39889  | 1305  | 0.26  | 99.69 |
| scaffold00566 | 110326 | 122381 | 12056 | 8.89  | C_unshiu_00078 | 45000  | 57027  | 12028 | 2.41  | 99.24 |
| scaffold00567 | 2085   | 6216   | 4132  | 3.05  | C_unshiu_00683 | 17512  | 21648  | 4137  | 2.79  | 99.64 |
| scaffold00567 | 7664   | 28443  | 20780 | 15.36 | C_unshiu_00683 | 23583  | 44388  | 20806 | 14.03 | 98.15 |
| scaffold00567 | 28955  | 31490  | 2536  | 1.87  | C_unshiu_00683 | 45297  | 47837  | 2541  | 1.71  | 99.02 |
| scaffold00567 | 60431  | 69440  | 9010  | 6.66  | C_unshiu_00683 | 76084  | 85081  | 8998  | 6.07  | 98.77 |
| scaffold00567 | 73147  | 78496  | 5350  | 3.95  | C_unshiu_00856 | 87669  | 93006  | 5338  | 4.37  | 99.29 |
| scaffold00567 | 79785  | 85141  | 5357  | 3.96  | C_unshiu_00856 | 94704  | 100061 | 5358  | 4.38  | 99.83 |
| scaffold00567 | 98667  | 101312 | 2646  | 1.96  | C_unshiu_02170 | 7864   | 10509  | 2646  | 7.68  | 99.89 |
| scaffold00567 | 101802 | 105411 | 3610  | 2.67  | C_unshiu_02170 | 11333  | 14942  | 3610  | 10.48 | 100   |
| scaffold00567 | 105406 | 107608 | 2203  | 1.63  | C_unshiu_00531 | 57316  | 55114  | 2203  | 1.2   | 100   |
| scaffold00567 | 107886 | 110168 | 2283  | 1.69  | C_unshiu_00683 | 104727 | 107009 | 2283  | 1.54  | 100   |
| scaffold00567 | 110341 | 129594 | 19254 | 14.23 | C_unshiu_00683 | 107326 | 126579 | 19254 | 12.98 | 99.95 |
| scaffold00567 | 131152 | 135301 | 4150  | 3.07  | C_unshiu_00683 | 128685 | 132834 | 4150  | 2.8   | 100   |
| scaffold00568 | 4528   | 17896  | 13369 | 9.89  | C_unshiu_00035 | 680908 | 667540 | 13369 | 1.95  | 99.86 |
| scaffold00568 | 19330  | 44917  | 25588 | 18.93 | C_unshiu_00035 | 666050 | 640463 | 25588 | 3.73  | 99.99 |
| scaffold00568 | 44918  | 46976  | 2059  | 1.52  | C_unshiu_00560 | 86811  | 88869  | 2059  | 1.17  | 100   |
| scaffold00568 | 46973  | 53648  | 6676  | 4.94  | C_unshiu_00035 | 637572 | 630880 | 6693  | 0.97  | 99.21 |
| scaffold00568 | 53765  | 55714  | 1950  | 1.44  | C_unshiu_00035 | 630770 | 628821 | 1950  | 0.28  | 100   |
| scaffold00568 | 56357  | 58139  | 1783  | 1.32  | C_unshiu_00452 | 71721  | 69939  | 1783  | 0.86  | 100   |
| scaffold00568 | 58139  | 73767  | 15629 | 11.56 | C_unshiu_00452 | 69644  | 54085  | 15560 | 7.51  | 99.22 |
| scaffold00568 | 75659  | 126902 | 51244 | 37.91 | C_unshiu_00452 | 51245  | 4      | 51242 | 24.75 | 99.99 |
| scaffold00569 | 17389  | 23079  | 5691  | 4.21  | C_unshiu_02446 | 1      | 5691   | 5691  | 21.66 | 99.81 |
| scaffold00569 | 24557  | 42702  | 18146 | 13.44 | C_unshiu_00463 | 76440  | 58297  | 18144 | 8.91  | 99.79 |
| scaffold00569 | 45580  | 67331  | 21752 | 16.11 | C_unshiu_02328 | 59     | 21766  | 21708 | 74.78 | 98.37 |
| scaffold00569 | 61154  | 81383  | 20230 | 14.98 | C_unshiu_00701 | 77458  | 57257  | 20202 | 14.06 | 99.05 |
| scaffold00569 | 83960  | 85896  | 1937  | 1.43  | C_unshiu_00701 | 54336  | 52400  | 1937  | 1.35  | 100   |
| scaffold00569 | 86506  | 88646  | 2141  | 1.59  | C_unshiu_00701 | 51529  | 49389  | 2141  | 1.49  | 100   |
| scaffold00569 | 89504  | 93398  | 3895  | 2.88  | C_unshiu_00701 | 47981  | 44133  | 3849  | 2.68  | 98.43 |
| scaffold00569 | 115696 | 124430 | 8735  | 6.47  | C_unshiu_03044 | 11206  | 2472   | 8735  | 75.33 | 99.91 |
| scaffold00569 | 124431 | 129828 | 5398  | 4     | C_unshiu_00520 | 159904 | 165301 | 5398  | 2.91  | 100   |
| scaffold00570 | 3325   | 9980   | 6656  | 4.93  | C_unshiu_01025 | 48691  | 55346  | 6656  | 6.44  | 98.83 |
| scaffold00570 | 14850  | 24606  | 9757  | 7.23  | C_unshiu_01025 | 64527  | 74282  | 9756  | 9.44  | 99.95 |
| scaffold00570 | 24621  | 39142  | 14522 | 10.76 | C_unshiu_01025 | 74618  | 89097  | 14480 | 14.01 | 98.89 |
| scaffold00570 | 41471  | 51081  | 9611  | 7.12  | C_unshiu_00848 | 5996   | 15608  | 9613  | 7.82  | 99.92 |
| scaffold00570 | 76885  | 93841  | 16957 | 12.57 | C_unshiu_00848 | 38520  | 55539  | 17020 | 13.85 | 98.06 |
| scaffold00570 | 103114 | 116380 | 13267 | 9.83  | C_unshiu_00848 | 63759  | 77031  | 13273 | 10.8  | 99.03 |
| scaffold00570 | 119219 | 128639 | 9421  | 6.98  | C_unshiu_00848 | 78330  | 87746  | 9417  | 7.66  | 99.94 |
| scaffold00570 | 130468 | 132113 | 1646  | 1.22  | C_unshiu_00848 | 89885  | 91530  | 1646  | 1.34  | 100   |
| scaffold00570 | 132107 | 134215 | 2109  | 1.56  | C_unshiu_00044 | 292276 | 294384 | 2109  | 0.33  | 100   |
| scaffold00571 | 1375   | 34830  | 33456 | 24.86 | C_unshiu_01397 | 1      | 33458  | 33458 | 47.42 | 99.52 |
| scaffold00571 | 35410  | 37981  | 2572  | 1.91  | C_unshiu_01397 | 34290  | 36867  | 2578  | 3.65  | 99.73 |
| scaffold00571 | 38102  | 42807  | 4706  | 3.5   | C_unshiu_01397 | 36731  | 41427  | 4697  | 6.66  | 98.45 |
| scaffold00571 | 44268  | 48664  | 4397  | 3.27  | C_unshiu_02178 | 21422  | 17028  | 4395  | 12.9  | 99.16 |
| scaffold00571 | 54732  | 60728  | 5997  | 4.46  | C_unshiu_02178 | 11996  | 5949   | 6048  | 17.76 | 98.55 |
| scaffold00571 | 60885  | 62553  | 1669  | 1.24  | C_unshiu_02178 | 5633   | 3961   | 1673  | 4.91  | 98.21 |
| scaffold00571 | 62551  | 74689  | 12139 | 9.02  | C_unshiu_01397 | 45471  | 57630  | 12160 | 17.24 | 98.72 |
| scaffold00571 | 66297  | 116237 | 49941 | 37.11 | C_unshiu_01759 | 14     | 49974  | 49961 | 99.97 | 99.11 |
| scaffold00571 | 117644 | 119601 | 1958  | 1.45  | C_unshiu_00474 | 79636  | 77666  | 1971  | 0.98  | 98.27 |
| scaffold00572 | 1      | 1747   | 1747  | 1.3   | C_unshiu_00144 | 298862 | 300608 | 1747  | 0.44  | 100   |
| scaffold00572 | 5757   | 6953   | 1197  | 0.89  | C_unshiu_00144 | 304402 | 305595 | 1194  | 0.3   | 99.75 |

|               |        |        |       |       |                |        |        |       |       |       |
|---------------|--------|--------|-------|-------|----------------|--------|--------|-------|-------|-------|
| scaffold00572 | 24784  | 36168  | 11385 | 8.46  | C_unshiu_01433 | 49342  | 60725  | 11384 | 16.69 | 99.68 |
| scaffold00572 | 43980  | 45956  | 1977  | 1.47  | C_unshiu_00018 | 63973  | 65949  | 1977  | 0.23  | 100   |
| scaffold00572 | 45950  | 80775  | 34826 | 25.89 | C_unshiu_00491 | 168360 | 133492 | 34869 | 17.8  | 99.83 |
| scaffold00572 | 80696  | 93132  | 12437 | 9.25  | C_unshiu_00491 | 133497 | 121069 | 12429 | 6.34  | 99.74 |
| scaffold00572 | 97941  | 99403  | 1463  | 1.09  | C_unshiu_00491 | 117291 | 115829 | 1463  | 0.75  | 100   |
| scaffold00572 | 101457 | 103494 | 2038  | 1.52  | C_unshiu_00491 | 113364 | 111327 | 2038  | 1.04  | 100   |
| scaffold00572 | 104297 | 106261 | 1965  | 1.46  | C_unshiu_01424 | 50154  | 52118  | 1965  | 2.86  | 100   |
| scaffold00572 | 106261 | 128144 | 21884 | 16.27 | C_unshiu_00491 | 108106 | 86260  | 21847 | 11.15 | 99.35 |
| scaffold00573 | 1      | 3755   | 3755  | 2.8   | C_unshiu_00456 | 9087   | 12851  | 3765  | 1.83  | 98.57 |
| scaffold00573 | 24513  | 30331  | 5819  | 4.33  | C_unshiu_00456 | 23956  | 29773  | 5818  | 2.83  | 98.94 |
| scaffold00573 | 38313  | 40227  | 1915  | 1.43  | C_unshiu_00456 | 38918  | 40833  | 1916  | 0.93  | 98.12 |
| scaffold00573 | 40266  | 48941  | 8676  | 6.46  | C_unshiu_00456 | 41049  | 49678  | 8630  | 4.2   | 98.09 |
| scaffold00573 | 71464  | 72557  | 1094  | 0.81  | C_unshiu_00456 | 71884  | 72975  | 1092  | 0.53  | 98.45 |
| scaffold00573 | 83709  | 85810  | 2102  | 1.57  | C_unshiu_00542 | 135833 | 137934 | 2102  | 1.17  | 100   |
| scaffold00573 | 85803  | 89277  | 3475  | 2.59  | C_unshiu_00456 | 83514  | 86989  | 3476  | 1.69  | 98.96 |
| scaffold00573 | 89435  | 90632  | 1198  | 0.89  | C_unshiu_00456 | 87294  | 88491  | 1198  | 0.58  | 99.17 |
| scaffold00573 | 92338  | 101073 | 8736  | 6.51  | C_unshiu_00471 | 24013  | 15281  | 8733  | 4.35  | 99.7  |
| scaffold00573 | 101674 | 108585 | 6912  | 5.15  | C_unshiu_00471 | 14381  | 7460   | 6922  | 3.44  | 98.87 |
| scaffold00573 | 117069 | 118378 | 1310  | 0.98  | C_unshiu_00333 | 240247 | 238940 | 1308  | 0.52  | 99.54 |
| scaffold00573 | 118443 | 130973 | 12531 | 9.33  | C_unshiu_00333 | 238735 | 226216 | 12520 | 4.98  | 99.69 |
| scaffold00574 | 9      | 30285  | 30277 | 22.6  | C_unshiu_00566 | 71469  | 101813 | 30345 | 17.35 | 99.5  |
| scaffold00574 | 30496  | 33586  | 3091  | 2.31  | C_unshiu_01309 | 38427  | 41517  | 3091  | 4.05  | 100   |
| scaffold00574 | 37166  | 39001  | 1836  | 1.37  | C_unshiu_00566 | 108266 | 110101 | 1836  | 1.05  | 100   |
| scaffold00574 | 38995  | 40818  | 1824  | 1.36  | C_unshiu_01348 | 45557  | 47380  | 1824  | 2.46  | 100   |
| scaffold00574 | 40819  | 60147  | 19329 | 14.43 | C_unshiu_00566 | 112336 | 131619 | 19284 | 11.03 | 99.71 |
| scaffold00574 | 60145  | 73752  | 13608 | 10.16 | C_unshiu_00566 | 131487 | 145150 | 13664 | 7.81  | 99.26 |
| scaffold00574 | 77144  | 79638  | 2495  | 1.86  | C_unshiu_00566 | 146911 | 149405 | 2495  | 1.43  | 100   |
| scaffold00574 | 82386  | 88534  | 6149  | 4.59  | C_unshiu_00566 | 150771 | 156919 | 6149  | 3.52  | 100   |
| scaffold00574 | 88552  | 93123  | 4572  | 3.41  | C_unshiu_01693 | 34991  | 30420  | 4572  | 8.67  | 99.8  |
| scaffold00574 | 94113  | 98122  | 4010  | 2.99  | C_unshiu_00566 | 160912 | 164923 | 4012  | 2.29  | 99.93 |
| scaffold00574 | 98826  | 108461 | 9636  | 7.19  | C_unshiu_01693 | 27019  | 17369  | 9651  | 18.3  | 99.38 |
| scaffold00574 | 108462 | 111590 | 3129  | 2.34  | C_unshiu_00057 | 488217 | 491345 | 3129  | 0.53  | 100   |
| scaffold00574 | 110355 | 111591 | 1237  | 0.92  | C_unshiu_00464 | 97014  | 95778  | 1237  | 0.61  | 100   |
| scaffold00574 | 126442 | 129434 | 2993  | 2.23  | C_unshiu_01110 | 49354  | 46347  | 3008  | 3.17  | 98.67 |
| scaffold00574 | 131224 | 132337 | 1114  | 0.83  | C_unshiu_01110 | 45520  | 44408  | 1113  | 1.17  | 99.82 |
| scaffold00575 | 1      | 2087   | 2087  | 1.57  | C_unshiu_01978 | 3574   | 1487   | 2088  | 5.06  | 99.86 |
| scaffold00575 | 3854   | 4922   | 1069  | 0.8   | C_unshiu_00372 | 34036  | 35102  | 1067  | 0.46  | 99.63 |
| scaffold00575 | 5634   | 8164   | 2531  | 1.9   | C_unshiu_00372 | 36195  | 38704  | 2510  | 1.08  | 99.05 |
| scaffold00575 | 8184   | 12441  | 4258  | 3.19  | C_unshiu_01102 | 55976  | 60183  | 4208  | 4.39  | 98.1  |
| scaffold00575 | 13478  | 18120  | 4643  | 3.48  | C_unshiu_01102 | 60115  | 64797  | 4683  | 4.88  | 98.55 |
| scaffold00575 | 20843  | 30703  | 9861  | 7.39  | C_unshiu_01102 | 69858  | 79719  | 9862  | 10.28 | 99.74 |
| scaffold00575 | 30711  | 31806  | 1096  | 0.82  | C_unshiu_01102 | 80308  | 81397  | 1090  | 1.14  | 98.91 |
| scaffold00575 | 32742  | 38301  | 5560  | 4.17  | C_unshiu_01102 | 82349  | 87908  | 5560  | 5.8   | 99.98 |
| scaffold00575 | 38321  | 41371  | 3051  | 2.29  | C_unshiu_01102 | 88264  | 91314  | 3051  | 3.18  | 100   |
| scaffold00575 | 54740  | 56908  | 2169  | 1.63  | C_unshiu_00125 | 32065  | 34233  | 2169  | 0.52  | 99.72 |
| scaffold00575 | 57606  | 59202  | 1597  | 1.2   | C_unshiu_00125 | 35281  | 36878  | 1598  | 0.38  | 99.81 |
| scaffold00575 | 61038  | 63316  | 2279  | 1.71  | C_unshiu_00125 | 37982  | 40262  | 2281  | 0.55  | 98.25 |
| scaffold00575 | 64228  | 67961  | 3734  | 2.8   | C_unshiu_00125 | 41484  | 45217  | 3734  | 0.89  | 99.97 |
| scaffold00575 | 75453  | 80560  | 5108  | 3.83  | C_unshiu_01057 | 99216  | 94116  | 5101  | 5.12  | 99.82 |
| scaffold00575 | 84531  | 104881 | 20351 | 15.26 | C_unshiu_01057 | 91228  | 70933  | 20296 | 20.38 | 99.25 |
| scaffold00575 | 108601 | 110509 | 1909  | 1.43  | C_unshiu_01057 | 67866  | 65958  | 1909  | 1.92  | 99.79 |
| scaffold00575 | 110523 | 116068 | 5546  | 4.16  | C_unshiu_01057 | 65405  | 59890  | 5516  | 5.54  | 98.97 |
| scaffold00575 | 115898 | 120611 | 4714  | 3.53  | C_unshiu_01057 | 59887  | 55174  | 4714  | 4.73  | 99.96 |
| scaffold00575 | 128287 | 132959 | 4673  | 3.5   | C_unshiu_01057 | 47438  | 42766  | 4673  | 4.69  | 99.94 |
| scaffold00576 | 9661   | 27483  | 17823 | 13.37 | C_unshiu_00057 | 548568 | 530762 | 17807 | 3.01  | 99.83 |
| scaffold00576 | 33273  | 58206  | 24934 | 18.7  | C_unshiu_00057 | 522011 | 497092 | 24920 | 4.22  | 99.63 |
| scaffold00576 | 55405  | 93629  | 38225 | 28.67 | C_unshiu_00701 | 2584   | 40845  | 38262 | 26.63 | 99.72 |
| scaffold00576 | 94472  | 125133 | 30662 | 23    | C_unshiu_02148 | 35156  | 4514   | 30643 | 87.05 | 99.29 |
| scaffold00577 | 1576   | 11768  | 10193 | 7.65  | C_unshiu_00899 | 1      | 10187  | 10187 | 8.7   | 99.9  |
| scaffold00577 | 21767  | 46402  | 24636 | 18.49 | C_unshiu_00050 | 2544   | 27159  | 24616 | 4.09  | 99.82 |
| scaffold00577 | 48896  | 54059  | 5164  | 3.88  | C_unshiu_00050 | 28341  | 33504  | 5164  | 0.86  | 100   |
| scaffold00577 | 80941  | 82112  | 1172  | 0.88  | C_unshiu_00674 | 75393  | 74223  | 1171  | 0.78  | 99.49 |
| scaffold00577 | 82413  | 127346 | 44934 | 33.72 | C_unshiu_00674 | 73714  | 28781  | 44934 | 29.94 | 99.99 |
| scaffold00577 | 129093 | 132693 | 3601  | 2.7   | C_unshiu_00351 | 199423 | 203022 | 3600  | 1.5   | 99.94 |
| scaffold00578 | 13858  | 15288  | 1431  | 1.07  | C_unshiu_01620 | 3577   | 4997   | 1421  | 2.51  | 98.25 |
| scaffold00578 | 30009  | 31723  | 1715  | 1.29  | C_unshiu_00304 | 219575 | 217858 | 1718  | 0.65  | 99.36 |
| scaffold00578 | 41124  | 42474  | 1351  | 1.01  | C_unshiu_00340 | 71800  | 70450  | 1351  | 0.54  | 100   |
| scaffold00578 | 45732  | 49054  | 3323  | 2.5   | C_unshiu_00021 | 154798 | 151476 | 3323  | 0.42  | 99.58 |
| scaffold00578 | 48677  | 64090  | 15414 | 11.58 | C_unshiu_00021 | 151732 | 136320 | 15413 | 1.96  | 99.99 |
| scaffold00578 | 67360  | 72572  | 5213  | 3.91  | C_unshiu_00021 | 136332 | 131132 | 5201  | 0.66  | 98.87 |
| scaffold00578 | 74603  | 80915  | 6313  | 4.74  | C_unshiu_00021 | 129900 | 123619 | 6282  | 0.8   | 98.66 |
| scaffold00578 | 81646  | 82666  | 1021  | 0.77  | C_unshiu_00080 | 260012 | 258988 | 1025  | 0.21  | 99.42 |
| scaffold00578 | 82666  | 83727  | 1062  | 0.8   | C_unshiu_00021 | 121938 | 120877 | 1062  | 0.14  | 100   |
| scaffold00578 | 85905  | 88095  | 2191  | 1.65  | C_unshiu_00021 | 118340 | 116146 | 2195  | 0.28  | 98.5  |
| scaffold00578 | 85905  | 88095  | 2191  | 1.65  | C_unshiu_00304 | 55468  | 57651  | 2184  | 0.82  | 99    |
| scaffold00578 | 90470  | 103634 | 13165 | 9.89  | C_unshiu_00304 | 208277 | 195113 | 13165 | 4.97  | 99.98 |
| scaffold00578 | 105416 | 131061 | 25646 | 19.26 | C_unshiu_00304 | 193735 | 168098 | 25638 | 9.68  | 99.86 |
| scaffold00579 | 1      | 6328   | 6328  | 4.78  | C_unshiu_00645 | 89222  | 95549  | 6328  | 4     | 100   |
| scaffold00579 | 8977   | 11376  | 2400  | 1.81  | C_unshiu_00645 | 96220  | 98619  | 2400  | 1.52  | 99.92 |

|               |        |        |       |       |                |        |        |       |       |       |
|---------------|--------|--------|-------|-------|----------------|--------|--------|-------|-------|-------|
| scaffold00579 | 11391  | 22226  | 10836 | 8.19  | C_unshiu_00645 | 98765  | 109598 | 10834 | 6.85  | 99.95 |
| scaffold00579 | 30079  | 46718  | 16640 | 12.58 | C_unshiu_00645 | 109432 | 126073 | 16642 | 10.52 | 99.91 |
| scaffold00579 | 35594  | 47150  | 11557 | 8.74  | C_unshiu_01021 | 97184  | 85713  | 11472 | 11.05 | 98.44 |
| scaffold00579 | 47753  | 51523  | 3771  | 2.85  | C_unshiu_00325 | 226527 | 222756 | 3772  | 1.48  | 99.1  |
| scaffold00579 | 51575  | 58314  | 6740  | 5.09  | C_unshiu_00325 | 222844 | 216114 | 6731  | 2.64  | 99.66 |
| scaffold00579 | 58308  | 61650  | 3343  | 2.53  | C_unshiu_00372 | 179729 | 176387 | 3343  | 1.44  | 100   |
| scaffold00579 | 62943  | 67026  | 4084  | 3.09  | C_unshiu_00325 | 212274 | 208191 | 4084  | 1.6   | 99.98 |
| scaffold00579 | 68949  | 73282  | 4334  | 3.28  | C_unshiu_02923 | 13771  | 9439   | 4333  | 28.41 | 99.77 |
| scaffold00579 | 73391  | 77928  | 4538  | 3.43  | C_unshiu_02923 | 9085   | 4545   | 4541  | 29.78 | 99.56 |
| scaffold00579 | 73661  | 78044  | 4384  | 3.31  | C_unshiu_00317 | 237754 | 233372 | 4383  | 1.7   | 99.2  |
| scaffold00579 | 78578  | 104788 | 26211 | 19.81 | C_unshiu_00317 | 232406 | 206196 | 26211 | 10.16 | 100   |
| scaffold00579 | 107885 | 112085 | 4201  | 3.18  | C_unshiu_00317 | 203899 | 199699 | 4201  | 1.63  | 99.98 |
| scaffold00579 | 113769 | 126288 | 12520 | 9.46  | C_unshiu_00317 | 197586 | 185064 | 12523 | 4.85  | 99.48 |
| scaffold00579 | 125575 | 128707 | 3133  | 2.37  | C_unshiu_00317 | 185503 | 182366 | 3138  | 1.22  | 98.69 |
| scaffold00579 | 128708 | 130007 | 1300  | 0.98  | C_unshiu_00317 | 17448  | 16149  | 1300  | 0.5   | 100   |
| scaffold00579 | 130006 | 132295 | 2290  | 1.73  | C_unshiu_00167 | 117231 | 119519 | 2289  | 0.62  | 99.74 |
| scaffold00580 | 1      | 1679   | 1679  | 1.28  | C_unshiu_01491 | 281    | 1954   | 1674  | 2.63  | 99.7  |
| scaffold00580 | 2357   | 6997   | 4641  | 3.54  | C_unshiu_01491 | 2146   | 6786   | 4641  | 7.28  | 99.94 |
| scaffold00580 | 7520   | 9686   | 2167  | 1.66  | C_unshiu_01491 | 7622   | 9788   | 2167  | 3.4   | 100   |
| scaffold00580 | 10812  | 15327  | 4516  | 3.45  | C_unshiu_01491 | 12449  | 16986  | 4538  | 7.12  | 99.32 |
| scaffold00580 | 19720  | 23492  | 3773  | 2.88  | C_unshiu_01491 | 19872  | 23649  | 3778  | 5.93  | 99.81 |
| scaffold00580 | 23517  | 27797  | 4281  | 3.27  | C_unshiu_01491 | 23960  | 28230  | 4271  | 6.7   | 99.14 |
| scaffold00580 | 28263  | 43419  | 15157 | 11.58 | C_unshiu_00822 | 6555   | 21667  | 15113 | 11.98 | 99.49 |
| scaffold00580 | 52715  | 54170  | 1456  | 1.11  | C_unshiu_00822 | 31594  | 33053  | 1460  | 1.16  | 99.11 |
| scaffold00580 | 53912  | 55955  | 2044  | 1.56  | C_unshiu_00822 | 33157  | 35200  | 2044  | 1.62  | 99.22 |
| scaffold00580 | 57066  | 59335  | 2270  | 1.73  | C_unshiu_00822 | 36567  | 38836  | 2270  | 1.8   | 100   |
| scaffold00580 | 61592  | 63350  | 1759  | 1.34  | C_unshiu_01491 | 40265  | 38503  | 1763  | 2.77  | 98.75 |
| scaffold00580 | 65300  | 67146  | 1847  | 1.41  | C_unshiu_02049 | 5823   | 3976   | 1848  | 4.78  | 99.41 |
| scaffold00580 | 71628  | 76098  | 4471  | 3.41  | C_unshiu_00529 | 60081  | 55610  | 4472  | 2.43  | 99.84 |
| scaffold00580 | 76102  | 80074  | 3973  | 3.03  | C_unshiu_00529 | 55499  | 51527  | 3973  | 2.16  | 99.87 |
| scaffold00580 | 80092  | 87312  | 7221  | 5.52  | C_unshiu_00529 | 49616  | 42413  | 7204  | 3.91  | 98.88 |
| scaffold00580 | 85824  | 93050  | 7227  | 5.52  | C_unshiu_01491 | 59691  | 52465  | 7227  | 11.34 | 99.81 |
| scaffold00580 | 93283  | 94630  | 1348  | 1.03  | C_unshiu_01491 | 51712  | 50365  | 1348  | 2.12  | 99.7  |
| scaffold00580 | 94909  | 101600 | 6692  | 5.11  | C_unshiu_01491 | 50095  | 43390  | 6706  | 10.53 | 98.48 |
| scaffold00580 | 109644 | 110801 | 1158  | 0.88  | C_unshiu_02689 | 20110  | 18952  | 1159  | 5.76  | 99.91 |
| scaffold00580 | 111788 | 113597 | 1810  | 1.38  | C_unshiu_02689 | 17593  | 15784  | 1810  | 9     | 99.39 |
| scaffold00580 | 114359 | 115456 | 1098  | 0.84  | C_unshiu_02049 | 18088  | 16991  | 1098  | 2.84  | 100   |
| scaffold00580 | 119881 | 121800 | 1920  | 1.47  | C_unshiu_00810 | 18367  | 16449  | 1919  | 1.51  | 99.64 |
| scaffold00582 | 1661   | 2995   | 1335  | 1.02  | C_unshiu_00261 | 278176 | 279510 | 1335  | 0.47  | 98.2  |
| scaffold00582 | 1661   | 2995   | 1335  | 1.02  | C_unshiu_00665 | 109019 | 107683 | 1337  | 0.87  | 98.13 |
| scaffold00582 | 8952   | 10681  | 1730  | 1.32  | C_unshiu_01157 | 88474  | 86760  | 1715  | 1.91  | 98.96 |
| scaffold00582 | 12910  | 14578  | 1669  | 1.28  | C_unshiu_00292 | 56594  | 54921  | 1674  | 0.62  | 98.69 |
| scaffold00582 | 15912  | 63462  | 47551 | 36.41 | C_unshiu_00292 | 53191  | 5641   | 47551 | 17.62 | 99.95 |
| scaffold00582 | 74499  | 79659  | 5161  | 3.95  | C_unshiu_00771 | 46062  | 40901  | 5162  | 3.89  | 99.98 |
| scaffold00582 | 85895  | 89081  | 3187  | 2.44  | C_unshiu_00771 | 33335  | 30164  | 3172  | 2.39  | 99.4  |
| scaffold00582 | 91740  | 110817 | 19078 | 14.61 | C_unshiu_00771 | 26977  | 7864   | 19114 | 14.4  | 99.53 |
| scaffold00582 | 129156 | 130604 | 1449  | 1.11  | C_unshiu_00771 | 1481   | 33     | 1449  | 1.09  | 100   |
| scaffold00583 | 7555   | 12128  | 4574  | 3.53  | C_unshiu_01000 | 53761  | 58313  | 4553  | 4.29  | 98.67 |
| scaffold00583 | 12441  | 19275  | 6835  | 5.28  | C_unshiu_01000 | 58862  | 65664  | 6803  | 6.41  | 98.48 |
| scaffold00583 | 21376  | 29104  | 7729  | 5.97  | C_unshiu_01000 | 68534  | 76250  | 7717  | 7.27  | 99.55 |
| scaffold00583 | 33339  | 43911  | 10573 | 8.16  | C_unshiu_01000 | 79695  | 90278  | 10584 | 9.98  | 98.58 |
| scaffold00583 | 45577  | 55893  | 10317 | 7.96  | C_unshiu_01000 | 92620  | 102950 | 10331 | 9.74  | 99.67 |
| scaffold00583 | 49715  | 93132  | 43418 | 33.52 | C_unshiu_00844 | 123148 | 79833  | 43316 | 35.17 | 98.63 |
| scaffold00583 | 94213  | 99906  | 5694  | 4.4   | C_unshiu_00844 | 78227  | 72552  | 5676  | 4.61  | 99.39 |
| scaffold00583 | 101139 | 103670 | 2532  | 1.95  | C_unshiu_01488 | 42067  | 39538  | 2530  | 3.97  | 99.21 |
| scaffold00583 | 105032 | 107186 | 2155  | 1.66  | C_unshiu_02332 | 12859  | 10705  | 2155  | 7.47  | 100   |
| scaffold00583 | 107186 | 109566 | 2381  | 1.84  | C_unshiu_01488 | 37388  | 35007  | 2382  | 3.73  | 99.66 |
| scaffold00583 | 109588 | 113779 | 4192  | 3.24  | C_unshiu_01488 | 35085  | 30894  | 4192  | 6.57  | 99.76 |
| scaffold00584 | 17746  | 28621  | 10876 | 8.4   | C_unshiu_00325 | 54827  | 43817  | 11011 | 4.32  | 98.15 |
| scaffold00584 | 31405  | 39051  | 7647  | 5.91  | C_unshiu_00325 | 42979  | 35325  | 7655  | 3.01  | 99.33 |
| scaffold00584 | 67254  | 68523  | 1270  | 0.98  | C_unshiu_00325 | 1      | 1270   | 1270  | 0.5   | 99.29 |
| scaffold00584 | 97034  | 113775 | 16742 | 12.94 | C_unshiu_00634 | 69934  | 86606  | 16673 | 10.42 | 98.96 |
| scaffold00584 | 116180 | 118063 | 1884  | 1.46  | C_unshiu_02836 | 2643   | 761    | 1883  | 11.06 | 99.05 |
| scaffold00584 | 118137 | 119756 | 1620  | 1.25  | C_unshiu_00966 | 75158  | 76777  | 1620  | 1.47  | 100   |
| scaffold00585 | 3674   | 4897   | 1224  | 0.95  | C_unshiu_02141 | 1732   | 2955   | 1224  | 3.47  | 100   |
| scaffold00585 | 10556  | 14029  | 3474  | 2.69  | C_unshiu_02141 | 8128   | 11574  | 3447  | 9.77  | 99.17 |
| scaffold00585 | 14042  | 19079  | 5038  | 3.9   | C_unshiu_00786 | 9675   | 14710  | 5036  | 3.86  | 99.72 |
| scaffold00585 | 21768  | 23821  | 2054  | 1.59  | C_unshiu_00633 | 115072 | 113017 | 2056  | 1.28  | 98.26 |
| scaffold00585 | 28141  | 31136  | 2996  | 2.32  | C_unshiu_00818 | 80165  | 83158  | 2994  | 2.37  | 99.9  |
| scaffold00585 | 34641  | 36331  | 1691  | 1.31  | C_unshiu_00083 | 25455  | 27139  | 1685  | 0.36  | 98.52 |
| scaffold00585 | 34641  | 36343  | 1703  | 1.32  | C_unshiu_01571 | 17387  | 15687  | 1701  | 2.88  | 98    |
| scaffold00585 | 38889  | 41960  | 3072  | 2.38  | C_unshiu_02218 | 26576  | 23506  | 3071  | 9.4   | 99.93 |
| scaffold00585 | 43524  | 44854  | 1331  | 1.03  | C_unshiu_03151 | 456    | 1786   | 1331  | 41.58 | 98.5  |
| scaffold00585 | 51006  | 52246  | 1241  | 0.96  | C_unshiu_02351 | 24270  | 25510  | 1241  | 4.37  | 99.36 |
| scaffold00585 | 52239  | 54264  | 2026  | 1.57  | C_unshiu_01478 | 16188  | 14163  | 2026  | 3.14  | 100   |
| scaffold00585 | 65066  | 68083  | 3018  | 2.34  | C_unshiu_01783 | 5366   | 8383   | 3018  | 6.14  | 99.11 |
| scaffold00585 | 70017  | 72020  | 2004  | 1.55  | C_unshiu_01783 | 8965   | 10972  | 2008  | 4.08  | 99.5  |
| scaffold00585 | 71959  | 75738  | 3780  | 2.93  | C_unshiu_01783 | 10971  | 14752  | 3782  | 7.69  | 99.6  |
| scaffold00585 | 78581  | 81811  | 3231  | 2.5   | C_unshiu_01783 | 15487  | 18726  | 3240  | 6.59  | 99.2  |

|               |        |        |       |       |                |        |        |       |       |       |
|---------------|--------|--------|-------|-------|----------------|--------|--------|-------|-------|-------|
| scaffold00585 | 90344  | 92930  | 2587  | 2     | C_unshiu_01439 | 7522   | 10109  | 2588  | 3.83  | 99.46 |
| scaffold00585 | 93121  | 95813  | 2693  | 2.09  | C_unshiu_01439 | 10163  | 12853  | 2691  | 3.98  | 99.74 |
| scaffold00585 | 108150 | 119976 | 11827 | 9.16  | C_unshiu_00586 | 162887 | 151063 | 11825 | 6.94  | 99.95 |
| scaffold00585 | 119982 | 121360 | 1379  | 1.07  | C_unshiu_00586 | 149854 | 148476 | 1379  | 0.81  | 100   |
| scaffold00586 | 4      | 1296   | 1293  | 1.01  | C_unshiu_00574 | 115947 | 117243 | 1297  | 0.75  | 98.23 |
| scaffold00586 | 7546   | 53401  | 45856 | 35.71 | C_unshiu_00574 | 123858 | 169718 | 45861 | 26.61 | 99.97 |
| scaffold00586 | 53857  | 55710  | 1854  | 1.44  | C_unshiu_00574 | 170500 | 172353 | 1854  | 1.08  | 100   |
| scaffold00586 | 60207  | 71937  | 11731 | 9.13  | C_unshiu_01730 | 33148  | 44867  | 11720 | 22.75 | 99.65 |
| scaffold00586 | 88619  | 96958  | 8340  | 6.49  | C_unshiu_00728 | 63343  | 54967  | 8377  | 6.03  | 98.52 |
| scaffold00586 | 107325 | 122020 | 14696 | 11.44 | C_unshiu_00728 | 43542  | 28855  | 14688 | 10.57 | 98.72 |
| scaffold00586 | 123340 | 127149 | 3810  | 2.97  | C_unshiu_00489 | 192185 | 196015 | 3831  | 1.95  | 98.31 |
| scaffold00587 | 1      | 2583   | 2583  | 2.02  | C_unshiu_00489 | 65953  | 68535  | 2583  | 1.32  | 100   |
| scaffold00587 | 2577   | 4646   | 2070  | 1.62  | C_unshiu_00953 | 86303  | 88372  | 2070  | 1.86  | 100   |
| scaffold00587 | 7336   | 8599   | 1264  | 0.99  | C_unshiu_00489 | 72257  | 73525  | 1269  | 0.65  | 99.05 |
| scaffold00587 | 10117  | 14037  | 3921  | 3.07  | C_unshiu_00489 | 75018  | 78944  | 3927  | 2     | 99.82 |
| scaffold00587 | 14408  | 15585  | 1178  | 0.92  | C_unshiu_00489 | 80131  | 78954  | 1178  | 0.6   | 99.75 |
| scaffold00587 | 37758  | 42657  | 4900  | 3.84  | C_unshiu_00489 | 104268 | 109196 | 4929  | 2.51  | 98.24 |
| scaffold00587 | 45164  | 46342  | 1179  | 0.92  | C_unshiu_00489 | 111564 | 112744 | 1181  | 0.6   | 99.83 |
| scaffold00587 | 70501  | 71533  | 1033  | 0.81  | C_unshiu_01584 | 26194  | 27226  | 1033  | 1.77  | 98.36 |
| scaffold00587 | 85634  | 87867  | 2234  | 1.75  | C_unshiu_02629 | 3316   | 5557   | 2242  | 10.44 | 99.42 |
| scaffold00587 | 88201  | 89987  | 1787  | 1.4   | C_unshiu_00489 | 143083 | 144869 | 1787  | 0.91  | 100   |
| scaffold00587 | 90037  | 100323 | 10287 | 8.06  | C_unshiu_02629 | 5682   | 15945  | 10264 | 47.78 | 98.48 |
| scaffold00588 | 1476   | 31941  | 30466 | 23.98 | C_unshiu_00033 | 248312 | 278754 | 30443 | 4.35  | 99.19 |
| scaffold00588 | 31990  | 36055  | 4066  | 3.2   | C_unshiu_00033 | 279128 | 283200 | 4073  | 0.58  | 98.75 |
| scaffold00588 | 48383  | 52572  | 4190  | 3.3   | C_unshiu_00930 | 75426  | 71249  | 4178  | 3.68  | 99.36 |
| scaffold00588 | 57212  | 71911  | 14700 | 11.57 | C_unshiu_00930 | 67930  | 53160  | 14771 | 13    | 98.75 |
| scaffold00588 | 97318  | 99007  | 1690  | 1.33  | C_unshiu_01431 | 66685  | 64996  | 1690  | 2.48  | 99.35 |
| scaffold00588 | 100023 | 104993 | 4971  | 3.91  | C_unshiu_00264 | 38505  | 43475  | 4971  | 1.75  | 100   |
| scaffold00588 | 106035 | 108452 | 2418  | 1.9   | C_unshiu_01431 | 57755  | 55338  | 2418  | 3.54  | 99.59 |
| scaffold00588 | 108699 | 118822 | 10124 | 7.97  | C_unshiu_01431 | 54859  | 44745  | 10115 | 14.82 | 99.45 |
| scaffold00589 | 1      | 12385  | 12385 | 9.77  | C_unshiu_01517 | 4904   | 17289  | 12386 | 19.86 | 99.93 |
| scaffold00589 | 17982  | 24165  | 6184  | 4.88  | C_unshiu_01517 | 22122  | 28305  | 6184  | 9.92  | 100   |
| scaffold00589 | 25892  | 36400  | 10509 | 8.29  | C_unshiu_01517 | 30668  | 41140  | 10473 | 16.8  | 99.55 |
| scaffold00589 | 38133  | 45141  | 7009  | 5.53  | C_unshiu_01517 | 42216  | 49200  | 6985  | 11.2  | 98.9  |
| scaffold00589 | 50182  | 59404  | 9223  | 7.27  | C_unshiu_01318 | 61448  | 52263  | 9186  | 12.14 | 99.36 |
| scaffold00589 | 59560  | 72657  | 13098 | 10.33 | C_unshiu_01318 | 51689  | 38614  | 13076 | 17.27 | 98.64 |
| scaffold00589 | 76375  | 86897  | 10523 | 8.3   | C_unshiu_01318 | 34165  | 23629  | 10537 | 13.92 | 98.07 |
| scaffold00589 | 87052  | 98506  | 11455 | 9.03  | C_unshiu_02196 | 1      | 11488  | 11488 | 34.51 | 98.9  |
| scaffold00589 | 102245 | 106953 | 4709  | 3.71  | C_unshiu_00835 | 120908 | 116196 | 4713  | 3.79  | 98.25 |
| scaffold00589 | 114605 | 122866 | 8262  | 6.51  | C_unshiu_00835 | 108493 | 100210 | 8284  | 6.67  | 98.45 |
| scaffold00589 | 118406 | 122866 | 4461  | 3.52  | C_unshiu_01458 | 65989  | 61512  | 4478  | 6.79  | 99.26 |
| scaffold00589 | 122871 | 124247 | 1377  | 1.09  | C_unshiu_01458 | 60378  | 59001  | 1378  | 2.09  | 99.85 |
| scaffold00590 | 4397   | 5737   | 1341  | 1.06  | C_unshiu_01029 | 82755  | 81415  | 1341  | 1.3   | 100   |
| scaffold00590 | 10111  | 25915  | 15805 | 12.52 | C_unshiu_01029 | 75681  | 59902  | 15780 | 15.32 | 99.58 |
| scaffold00590 | 29945  | 32049  | 2105  | 1.67  | C_unshiu_00470 | 190377 | 188294 | 2084  | 1.04  | 98.67 |
| scaffold00590 | 32287  | 33817  | 1531  | 1.21  | C_unshiu_02376 | 21244  | 22793  | 1550  | 5.58  | 98.52 |
| scaffold00590 | 39126  | 41694  | 2569  | 2.04  | C_unshiu_01733 | 1326   | 3914   | 2589  | 5.04  | 98.61 |
| scaffold00590 | 58572  | 61401  | 2830  | 2.24  | C_unshiu_01029 | 32032  | 29202  | 2831  | 2.75  | 98.66 |
| scaffold00590 | 119028 | 120166 | 1139  | 0.9   | C_unshiu_01029 | 96020  | 94882  | 1139  | 1.11  | 100   |
| scaffold00590 | 121429 | 123939 | 2511  | 1.99  | C_unshiu_01029 | 93016  | 90506  | 2511  | 2.44  | 99.76 |
| scaffold00591 | 1      | 8153   | 8153  | 6.48  | C_unshiu_01002 | 91213  | 99363  | 8151  | 7.7   | 99.6  |
| scaffold00591 | 10566  | 13059  | 2494  | 1.98  | C_unshiu_02004 | 27639  | 25150  | 2490  | 6.14  | 99.84 |
| scaffold00591 | 13707  | 32094  | 18388 | 14.62 | C_unshiu_02004 | 24694  | 6283   | 18412 | 45.43 | 99.02 |
| scaffold00591 | 32158  | 36185  | 4028  | 3.2   | C_unshiu_02004 | 5846   | 1818   | 4029  | 9.94  | 99.18 |
| scaffold00591 | 67652  | 78797  | 11146 | 8.86  | C_unshiu_01648 | 25543  | 14386  | 11158 | 20.2  | 99.5  |
| scaffold00591 | 79912  | 87663  | 7752  | 6.16  | C_unshiu_01648 | 13699  | 6012   | 7688  | 13.92 | 98.47 |
| scaffold00591 | 91655  | 112246 | 20592 | 16.37 | C_unshiu_02664 | 20605  | 1      | 20605 | 100   | 99.88 |
| scaffold00593 | 6178   | 9314   | 3137  | 2.5   | C_unshiu_00042 | 87789  | 84649  | 3141  | 0.49  | 99.24 |
| scaffold00593 | 12328  | 16087  | 3760  | 2.99  | C_unshiu_00042 | 85218  | 81456  | 3763  | 0.59  | 99.84 |
| scaffold00593 | 16102  | 17750  | 1649  | 1.31  | C_unshiu_00042 | 78698  | 77050  | 1649  | 0.26  | 100   |
| scaffold00593 | 18598  | 25803  | 7206  | 5.74  | C_unshiu_00042 | 75867  | 68670  | 7198  | 1.12  | 99.42 |
| scaffold00593 | 25556  | 40390  | 14835 | 11.81 | C_unshiu_00042 | 68660  | 53886  | 14775 | 2.31  | 98.75 |
| scaffold00593 | 51803  | 55269  | 3467  | 2.76  | C_unshiu_02104 | 1      | 3457   | 3457  | 9.52  | 98.42 |
| scaffold00593 | 55457  | 61564  | 6108  | 4.86  | C_unshiu_02104 | 3557   | 9655   | 6099  | 16.8  | 99.23 |
| scaffold00593 | 60937  | 71338  | 10402 | 8.28  | C_unshiu_02104 | 9652   | 20052  | 10401 | 28.64 | 99.79 |
| scaffold00593 | 83442  | 98293  | 14852 | 11.83 | C_unshiu_00605 | 23053  | 8203   | 14851 | 8.96  | 98.87 |
| scaffold00593 | 98301  | 106245 | 7945  | 6.33  | C_unshiu_00605 | 7933   | 1      | 7933  | 4.79  | 99.79 |
| scaffold00593 | 106533 | 125571 | 19039 | 15.16 | C_unshiu_01473 | 64913  | 45890  | 19024 | 29.31 | 99.91 |
| scaffold00596 | 1      | 2145   | 2145  | 1.72  | C_unshiu_02320 | 26633  | 28781  | 2149  | 7.34  | 99.3  |
| scaffold00596 | 12434  | 22863  | 10430 | 8.37  | C_unshiu_00363 | 36911  | 26430  | 10482 | 4.45  | 98.67 |
| scaffold00596 | 23555  | 25293  | 1739  | 1.39  | C_unshiu_00363 | 25399  | 23663  | 1737  | 0.74  | 99.6  |
| scaffold00596 | 25311  | 33279  | 7969  | 6.39  | C_unshiu_00363 | 22240  | 14289  | 7952  | 3.38  | 99.34 |
| scaffold00596 | 37806  | 46872  | 9067  | 7.27  | C_unshiu_00363 | 9205   | 123    | 9083  | 3.86  | 99.05 |
| scaffold00596 | 48975  | 56581  | 7607  | 6.1   | C_unshiu_00152 | 378952 | 371343 | 7610  | 1.98  | 99.79 |
| scaffold00596 | 56606  | 57839  | 1234  | 0.99  | C_unshiu_00152 | 371246 | 370013 | 1234  | 0.32  | 100   |
| scaffold00596 | 57927  | 61457  | 3531  | 2.83  | C_unshiu_00152 | 369144 | 365616 | 3529  | 0.92  | 98.07 |
| scaffold00596 | 65029  | 71014  | 5986  | 4.8   | C_unshiu_00152 | 362772 | 356772 | 6001  | 1.56  | 99.23 |
| scaffold00596 | 73391  | 90579  | 17189 | 13.79 | C_unshiu_00152 | 350918 | 333774 | 17145 | 4.46  | 98.72 |
| scaffold00596 | 113674 | 124612 | 10939 | 8.77  | C_unshiu_00152 | 310274 | 299380 | 10895 | 2.83  | 98.96 |

|               |        |        |       |       |                |        |        |       |       |       |
|---------------|--------|--------|-------|-------|----------------|--------|--------|-------|-------|-------|
| scaffold00598 | 1885   | 3409   | 1525  | 1.23  | C_unshiu_00438 | 72878  | 74403  | 1526  | 0.72  | 99.48 |
| scaffold00598 | 24774  | 27357  | 2584  | 2.08  | C_unshiu_00438 | 92136  | 94724  | 2589  | 1.22  | 98.96 |
| scaffold00598 | 29262  | 33742  | 4481  | 3.6   | C_unshiu_00438 | 96847  | 101339 | 4493  | 2.12  | 98.24 |
| scaffold00598 | 40408  | 45724  | 5317  | 4.27  | C_unshiu_00438 | 108895 | 114223 | 5329  | 2.51  | 98.11 |
| scaffold00598 | 48168  | 50753  | 2586  | 2.08  | C_unshiu_00836 | 8099   | 10683  | 2585  | 2.08  | 98.18 |
| scaffold00598 | 50754  | 54709  | 3956  | 3.18  | C_unshiu_00689 | 116318 | 112363 | 3956  | 2.7   | 100   |
| scaffold00598 | 62331  | 88312  | 25982 | 20.88 | C_unshiu_00188 | 208127 | 234084 | 25958 | 7.52  | 99.1  |
| scaffold00599 | 9055   | 15775  | 6721  | 5.41  | C_unshiu_00530 | 167183 | 160452 | 6732  | 3.66  | 99.44 |
| scaffold00599 | 24001  | 26347  | 2347  | 1.89  | C_unshiu_01179 | 65848  | 63500  | 2349  | 2.68  | 98.6  |
| scaffold00599 | 26596  | 27670  | 1075  | 0.87  | C_unshiu_01179 | 62425  | 63500  | 1076  | 1.23  | 98.88 |
| scaffold00599 | 28623  | 33442  | 4820  | 3.88  | C_unshiu_01179 | 61043  | 56226  | 4818  | 5.5   | 98.74 |
| scaffold00599 | 34083  | 35424  | 1342  | 1.08  | C_unshiu_01179 | 55474  | 54133  | 1342  | 1.53  | 99.85 |
| scaffold00599 | 35497  | 55549  | 20053 | 16.14 | C_unshiu_01179 | 53808  | 33763  | 20046 | 22.9  | 99.73 |
| scaffold00599 | 64158  | 73038  | 8881  | 7.15  | C_unshiu_01179 | 21520  | 12632  | 8889  | 10.16 | 98.54 |
| scaffold00599 | 73035  | 75525  | 2491  | 2.01  | C_unshiu_01179 | 12091  | 9601   | 2491  | 2.85  | 99.72 |
| scaffold00599 | 75626  | 79273  | 3648  | 2.94  | C_unshiu_01179 | 9217   | 5569   | 3649  | 4.17  | 99.02 |
| scaffold00599 | 80664  | 84017  | 3354  | 2.7   | C_unshiu_01179 | 5511   | 2154   | 3358  | 3.84  | 99.08 |
| scaffold00599 | 81132  | 84539  | 3408  | 2.74  | C_unshiu_00530 | 114432 | 111044 | 3389  | 1.84  | 98.53 |
| scaffold00599 | 86910  | 89201  | 2292  | 1.84  | C_unshiu_02384 | 20327  | 22617  | 2291  | 8.31  | 99.48 |
| scaffold00599 | 92762  | 94881  | 2120  | 1.71  | C_unshiu_02384 | 22675  | 24794  | 2120  | 7.69  | 100   |
| scaffold00599 | 94892  | 97469  | 2578  | 2.08  | C_unshiu_02384 | 25000  | 27577  | 2578  | 9.35  | 100   |
| scaffold00599 | 107884 | 109246 | 1363  | 1.1   | C_unshiu_00530 | 98332  | 96967  | 1366  | 0.74  | 98.9  |
| scaffold00599 | 109829 | 111012 | 1184  | 0.95  | C_unshiu_02013 | 28041  | 26844  | 1198  | 2.98  | 98.33 |
| scaffold00599 | 114544 | 117659 | 3116  | 2.51  | C_unshiu_00530 | 92968  | 89855  | 3114  | 1.69  | 98.08 |
| scaffold00600 | 6      | 6360   | 6355  | 5.12  | C_unshiu_00148 | 200228 | 193860 | 6369  | 1.64  | 99.76 |
| scaffold00600 | 6463   | 7467   | 1005  | 0.81  | C_unshiu_00148 | 193763 | 192758 | 1006  | 0.26  | 99.8  |
| scaffold00600 | 7485   | 22576  | 15092 | 12.16 | C_unshiu_00054 | 530850 | 545957 | 15108 | 2.54  | 99.69 |
| scaffold00600 | 26470  | 27943  | 1474  | 1.19  | C_unshiu_00054 | 549245 | 550717 | 1473  | 0.25  | 99.39 |
| scaffold00600 | 27944  | 29539  | 1596  | 1.29  | C_unshiu_00054 | 552297 | 550719 | 1579  | 0.27  | 98.31 |
| scaffold00600 | 31460  | 36219  | 4760  | 3.83  | C_unshiu_00568 | 36489  | 31730  | 4760  | 2.73  | 100   |
| scaffold00600 | 37304  | 58445  | 21142 | 17.03 | C_unshiu_00568 | 29788  | 8737   | 21052 | 12.06 | 98.03 |
| scaffold00600 | 86041  | 88431  | 2391  | 1.93  | C_unshiu_01605 | 3346   | 5742   | 2397  | 4.19  | 98.29 |
| scaffold00600 | 91718  | 123571 | 31854 | 25.66 | C_unshiu_00099 | 407204 | 439075 | 31872 | 6.95  | 99.59 |
| scaffold00601 | 1      | 7424   | 7424  | 5.98  | C_unshiu_00242 | 70605  | 63203  | 7403  | 2.46  | 99.21 |
| scaffold00601 | 9002   | 59190  | 50189 | 40.44 | C_unshiu_00242 | 62953  | 12752  | 50202 | 16.7  | 99.96 |
| scaffold00601 | 60955  | 71395  | 10441 | 8.41  | C_unshiu_00242 | 10417  | 1      | 10417 | 3.47  | 99.77 |
| scaffold00601 | 69154  | 107685 | 38532 | 31.05 | C_unshiu_00544 | 127741 | 166252 | 38512 | 21.47 | 99.9  |
| scaffold00601 | 107884 | 119817 | 11934 | 9.62  | C_unshiu_00544 | 166858 | 178779 | 11922 | 6.65  | 99.74 |
| scaffold00602 | 615    | 15565  | 14951 | 12.07 | C_unshiu_02522 | 3682   | 18554  | 14873 | 61.98 | 98.42 |
| scaffold00602 | 17233  | 18869  | 1637  | 1.32  | C_unshiu_02522 | 20749  | 22384  | 1636  | 6.82  | 99.57 |
| scaffold00602 | 18861  | 21605  | 2745  | 2.22  | C_unshiu_00542 | 135182 | 137926 | 2745  | 1.53  | 100   |
| scaffold00602 | 22957  | 25911  | 2955  | 2.39  | C_unshiu_00663 | 56329  | 59285  | 2957  | 1.93  | 99.93 |
| scaffold00602 | 35327  | 59733  | 24407 | 19.7  | C_unshiu_02026 | 2885   | 27324  | 24440 | 61.66 | 99.35 |
| scaffold00602 | 67546  | 77137  | 9592  | 7.74  | C_unshiu_01987 | 29361  | 19756  | 9606  | 23.43 | 99.46 |
| scaffold00602 | 87076  | 96548  | 9473  | 7.65  | C_unshiu_01987 | 9463   | 1      | 9463  | 23.08 | 99.77 |
| scaffold00602 | 102643 | 113703 | 11061 | 8.93  | C_unshiu_01340 | 57994  | 69062  | 11069 | 14.84 | 99.36 |
| scaffold00602 | 119222 | 121453 | 2232  | 1.8   | C_unshiu_00419 | 48147  | 45921  | 2227  | 1.02  | 98.17 |
| scaffold00603 | 41891  | 66211  | 24321 | 19.66 | C_unshiu_00204 | 212709 | 237017 | 24309 | 7.31  | 99.16 |
| scaffold00603 | 68053  | 72852  | 4800  | 3.88  | C_unshiu_00204 | 239887 | 244687 | 4801  | 1.44  | 99.1  |
| scaffold00603 | 74212  | 76156  | 1945  | 1.57  | C_unshiu_00204 | 246429 | 248353 | 1925  | 0.58  | 98.51 |
| scaffold00603 | 76159  | 107304 | 31146 | 25.17 | C_unshiu_00204 | 248455 | 279688 | 31234 | 9.39  | 98.85 |
| scaffold00603 | 108844 | 114331 | 5488  | 4.44  | C_unshiu_01993 | 12746  | 18266  | 5521  | 13.52 | 98.82 |
| scaffold00603 | 115434 | 122209 | 6776  | 5.48  | C_unshiu_01993 | 19650  | 26448  | 6799  | 16.65 | 99.12 |
| scaffold00604 | 1      | 99573  | 99573 | 80.88 | C_unshiu_00071 | 124251 | 24704  | 99548 | 19.06 | 99.95 |
| scaffold00604 | 101184 | 120659 | 19476 | 15.82 | C_unshiu_00071 | 22780  | 3309   | 19472 | 3.73  | 99.82 |
| scaffold00606 | 29553  | 32657  | 3105  | 2.54  | C_unshiu_00304 | 102964 | 99860  | 3105  | 1.17  | 99.9  |
| scaffold00606 | 36696  | 52399  | 15704 | 12.85 | C_unshiu_00304 | 92972  | 77264  | 15709 | 5.93  | 99.89 |
| scaffold00606 | 52993  | 56270  | 3278  | 2.68  | C_unshiu_00304 | 71888  | 68611  | 3278  | 1.24  | 100   |
| scaffold00606 | 67282  | 84903  | 17622 | 14.42 | C_unshiu_01302 | 1      | 17550  | 17550 | 22.7  | 99.52 |
| scaffold00606 | 85403  | 96389  | 10987 | 8.99  | C_unshiu_01302 | 18117  | 29103  | 10987 | 14.21 | 99.98 |
| scaffold00606 | 99441  | 115258 | 15818 | 12.94 | C_unshiu_01351 | 20980  | 5163   | 15818 | 21.4  | 99.93 |
| scaffold00606 | 115642 | 117289 | 1648  | 1.35  | C_unshiu_00021 | 97565  | 95912  | 1654  | 0.21  | 98.55 |
| scaffold00606 | 117604 | 119210 | 1607  | 1.31  | C_unshiu_01351 | 2280   | 674    | 1607  | 2.17  | 99.88 |
| scaffold00607 | 14085  | 17203  | 3119  | 2.57  | C_unshiu_01623 | 1      | 3096   | 3096  | 5.48  | 98.27 |
| scaffold00607 | 19019  | 21016  | 1998  | 1.65  | C_unshiu_01623 | 5632   | 7646   | 2015  | 3.57  | 98.22 |
| scaffold00607 | 48174  | 51919  | 3746  | 3.09  | C_unshiu_01837 | 17357  | 13615  | 3743  | 7.96  | 99.36 |
| scaffold00607 | 52657  | 55068  | 2412  | 1.99  | C_unshiu_01967 | 34839  | 32428  | 2412  | 5.76  | 100   |
| scaffold00607 | 72515  | 74401  | 1887  | 1.56  | C_unshiu_02634 | 8059   | 6173   | 1887  | 8.85  | 100   |
| scaffold00607 | 76096  | 78190  | 2095  | 1.73  | C_unshiu_01062 | 68351  | 70474  | 2124  | 2.15  | 98.26 |
| scaffold00607 | 88019  | 89895  | 1877  | 1.55  | C_unshiu_00175 | 12338  | 14214  | 1877  | 0.52  | 100   |
| scaffold00607 | 89899  | 91155  | 1257  | 1.04  | C_unshiu_02007 | 24247  | 25493  | 1247  | 3.08  | 98.49 |
| scaffold00607 | 91232  | 95093  | 3862  | 3.19  | C_unshiu_02007 | 25605  | 29475  | 3871  | 9.57  | 99.69 |
| scaffold00607 | 116297 | 117604 | 1308  | 1.08  | C_unshiu_01062 | 67277  | 68587  | 1311  | 1.32  | 99.39 |
| scaffold00607 | 118693 | 120392 | 1700  | 1.4   | C_unshiu_02634 | 15595  | 17294  | 1700  | 7.97  | 99.41 |
| scaffold00608 | 1      | 69378  | 69378 | 57.56 | C_unshiu_00513 | 102714 | 33396  | 69319 | 37.01 | 99.72 |
| scaffold00608 | 69507  | 93022  | 23516 | 19.51 | C_unshiu_00513 | 33311  | 9797   | 23515 | 12.55 | 99.98 |
| scaffold00608 | 93020  | 101435 | 8416  | 6.98  | C_unshiu_00513 | 1      | 8381   | 8381  | 4.47  | 99.06 |
| scaffold00609 | 4916   | 18560  | 13645 | 11.32 | C_unshiu_01818 | 649    | 14275  | 13627 | 28.48 | 99.36 |
| scaffold00609 | 18584  | 26089  | 7506  | 6.23  | C_unshiu_01818 | 14776  | 22292  | 7517  | 15.71 | 98.64 |

|               |        |        |       |       |                |        |        |       |       |       |
|---------------|--------|--------|-------|-------|----------------|--------|--------|-------|-------|-------|
| scaffold00609 | 38411  | 40564  | 2154  | 1.79  | C_unshiu_01265 | 56880  | 54727  | 2154  | 2.7   | 100   |
| scaffold00609 | 41076  | 45709  | 4634  | 3.85  | C_unshiu_00722 | 46442  | 41809  | 4634  | 3.28  | 100   |
| scaffold00609 | 57206  | 94110  | 36905 | 30.62 | C_unshiu_00921 | 30     | 36956  | 36927 | 32.22 | 99.77 |
| scaffold00609 | 100669 | 103427 | 2759  | 2.29  | C_unshiu_00448 | 31875  | 29111  | 2765  | 1.33  | 99.53 |
| scaffold00609 | 104208 | 107834 | 3627  | 3.01  | C_unshiu_00448 | 27882  | 24256  | 3627  | 1.74  | 100   |
| scaffold00609 | 107836 | 120174 | 12339 | 10.24 | C_unshiu_00448 | 23916  | 11583  | 12334 | 5.91  | 99    |
| scaffold00611 | 1      | 3762   | 3762  | 3.13  | C_unshiu_01049 | 72078  | 75839  | 3762  | 3.76  | 100   |
| scaffold00611 | 51602  | 65822  | 14221 | 11.83 | C_unshiu_01685 | 14221  | 1      | 14221 | 26.7  | 99.99 |
| scaffold00611 | 85849  | 88207  | 2359  | 1.96  | C_unshiu_01301 | 53528  | 55881  | 2354  | 3.04  | 99.58 |
| scaffold00611 | 89969  | 91909  | 1941  | 1.61  | C_unshiu_01301 | 57524  | 59473  | 1950  | 2.52  | 98.41 |
| scaffold00611 | 96207  | 109323 | 13117 | 10.91 | C_unshiu_01301 | 64304  | 77396  | 13093 | 16.92 | 99.44 |
| scaffold00612 | 11456  | 12459  | 1004  | 0.84  | C_unshiu_01793 | 47719  | 48718  | 1000  | 2.05  | 99.4  |
| scaffold00612 | 15979  | 33719  | 17741 | 14.78 | C_unshiu_00486 | 131786 | 114026 | 17761 | 9.02  | 99.84 |
| scaffold00612 | 37977  | 40064  | 2088  | 1.74  | C_unshiu_00486 | 110624 | 108537 | 2088  | 1.06  | 100   |
| scaffold00612 | 41487  | 46448  | 4962  | 4.13  | C_unshiu_00486 | 106753 | 101788 | 4966  | 2.52  | 99.68 |
| scaffold00612 | 47732  | 71423  | 23692 | 19.74 | C_unshiu_00486 | 101107 | 77425  | 23683 | 12.02 | 99.88 |
| scaffold00612 | 71852  | 83068  | 11217 | 9.34  | C_unshiu_00486 | 76629  | 65413  | 11217 | 5.69  | 99.91 |
| scaffold00612 | 85267  | 86612  | 1346  | 1.12  | C_unshiu_00486 | 62780  | 61442  | 1339  | 0.68  | 99.26 |
| scaffold00612 | 86930  | 88032  | 1103  | 0.92  | C_unshiu_00486 | 61339  | 60237  | 1103  | 0.56  | 99.91 |
| scaffold00612 | 88467  | 92304  | 3838  | 3.2   | C_unshiu_00486 | 60353  | 56515  | 3839  | 1.95  | 99.82 |
| scaffold00612 | 97566  | 117003 | 19438 | 16.19 | C_unshiu_00486 | 52031  | 32594  | 19438 | 9.87  | 99.98 |
| scaffold00613 | 6968   | 32642  | 25675 | 21.53 | C_unshiu_01400 | 4942   | 30611  | 25670 | 36.46 | 99.96 |
| scaffold00613 | 36856  | 59354  | 22499 | 18.87 | C_unshiu_01687 | 20825  | 43325  | 22501 | 42.3  | 99.98 |
| scaffold00613 | 85072  | 88615  | 3544  | 2.97  | C_unshiu_00145 | 82989  | 86503  | 3515  | 0.89  | 98.9  |
| scaffold00613 | 87655  | 88917  | 1263  | 1.06  | C_unshiu_00074 | 497172 | 495909 | 1264  | 0.25  | 99.76 |
| scaffold00613 | 97792  | 110772 | 12981 | 10.89 | C_unshiu_00128 | 297806 | 310787 | 12982 | 3.14  | 99.94 |
| scaffold00613 | 111233 | 114257 | 3025  | 2.54  | C_unshiu_01669 | 42998  | 46020  | 3023  | 5.58  | 98.71 |
| scaffold00613 | 114258 | 119247 | 4990  | 4.18  | C_unshiu_01669 | 48211  | 53154  | 4944  | 9.13  | 98.24 |
| scaffold00614 | 2247   | 4422   | 2176  | 1.83  | C_unshiu_00418 | 69951  | 72126  | 2176  | 0.99  | 100   |
| scaffold00614 | 4423   | 5866   | 1444  | 1.21  | C_unshiu_01405 | 11517  | 10074  | 1444  | 2.06  | 98.06 |
| scaffold00614 | 10166  | 16432  | 6267  | 5.26  | C_unshiu_00831 | 119541 | 113262 | 6280  | 5.03  | 99.6  |
| scaffold00614 | 16575  | 24392  | 7818  | 6.56  | C_unshiu_00831 | 112737 | 104932 | 7806  | 6.25  | 98.98 |
| scaffold00614 | 24860  | 29201  | 4342  | 3.64  | C_unshiu_00790 | 109187 | 113526 | 4340  | 3.34  | 99.13 |
| scaffold00614 | 31138  | 37967  | 6830  | 5.73  | C_unshiu_00790 | 114430 | 121255 | 6826  | 5.26  | 99.63 |
| scaffold00614 | 45812  | 47928  | 2117  | 1.78  | C_unshiu_00775 | 132095 | 129979 | 2117  | 1.6   | 99.53 |
| scaffold00614 | 51931  | 57018  | 5088  | 4.27  | C_unshiu_00775 | 126819 | 121727 | 5093  | 3.86  | 99.53 |
| scaffold00614 | 59401  | 63428  | 4028  | 3.38  | C_unshiu_01790 | 16170  | 20218  | 4049  | 8.29  | 99.11 |
| scaffold00614 | 64033  | 66043  | 2011  | 1.69  | C_unshiu_01790 | 21384  | 23396  | 2013  | 4.12  | 99.55 |
| scaffold00614 | 66129  | 68859  | 2731  | 2.29  | C_unshiu_02470 | 10525  | 13264  | 2740  | 10.75 | 98.36 |
| scaffold00614 | 68884  | 70933  | 2050  | 1.72  | C_unshiu_02470 | 13820  | 15871  | 2052  | 8.05  | 98.49 |
| scaffold00614 | 71644  | 72793  | 1150  | 0.96  | C_unshiu_02470 | 17034  | 18183  | 1150  | 4.51  | 99.48 |
| scaffold00614 | 74961  | 84779  | 9819  | 8.24  | C_unshiu_01790 | 38707  | 48503  | 9797  | 20.07 | 99.62 |
| scaffold00614 | 98862  | 114446 | 15585 | 13.07 | C_unshiu_01531 | 4      | 15595  | 15592 | 25.32 | 99.31 |
| scaffold00614 | 118036 | 119215 | 1180  | 0.99  | C_unshiu_01531 | 18990  | 20169  | 1180  | 1.92  | 99.49 |
| scaffold00615 | 4136   | 29454  | 25319 | 21.33 | C_unshiu_02387 | 2228   | 27523  | 25296 | 91.91 | 99.72 |
| scaffold00615 | 44196  | 45199  | 1004  | 0.85  | C_unshiu_00642 | 156247 | 155244 | 1004  | 0.63  | 100   |
| scaffold00615 | 46142  | 47335  | 1194  | 1.01  | C_unshiu_00642 | 153966 | 152773 | 1194  | 0.75  | 100   |
| scaffold00615 | 47587  | 49483  | 1897  | 1.6   | C_unshiu_00011 | 335715 | 333838 | 1878  | 0.19  | 98.58 |
| scaffold00615 | 50588  | 59833  | 9246  | 7.79  | C_unshiu_00011 | 332572 | 323319 | 9254  | 0.96  | 99.14 |
| scaffold00615 | 59838  | 61014  | 1177  | 0.99  | C_unshiu_00011 | 300652 | 301833 | 1182  | 0.12  | 98.31 |
| scaffold00615 | 68355  | 69724  | 1370  | 1.15  | C_unshiu_00011 | 315849 | 317218 | 1370  | 0.14  | 98.39 |
| scaffold00615 | 85290  | 86400  | 1111  | 0.94  | C_unshiu_02287 | 29084  | 30195  | 1112  | 3.68  | 99.37 |
| scaffold00615 | 90294  | 93336  | 3043  | 2.56  | C_unshiu_00011 | 307015 | 310057 | 3043  | 0.31  | 100   |
| scaffold00615 | 97485  | 98510  | 1026  | 0.86  | C_unshiu_00011 | 313219 | 314244 | 1026  | 0.11  | 99.61 |
| scaffold00615 | 98573  | 102554 | 3982  | 3.35  | C_unshiu_02287 | 14381  | 18403  | 4023  | 13.32 | 98.63 |
| scaffold00615 | 104272 | 113462 | 9191  | 7.74  | C_unshiu_02287 | 18841  | 27967  | 9127  | 30.23 | 98.24 |
| scaffold00616 | 2183   | 19414  | 17232 | 14.57 | C_unshiu_00417 | 70638  | 87865  | 17228 | 7.85  | 99.64 |
| scaffold00616 | 20541  | 35770  | 15230 | 12.88 | C_unshiu_00417 | 87859  | 103091 | 15233 | 6.94  | 98.33 |
| scaffold00616 | 37722  | 39637  | 1916  | 1.62  | C_unshiu_00417 | 161667 | 163582 | 1916  | 0.87  | 100   |
| scaffold00616 | 40467  | 41954  | 1488  | 1.26  | C_unshiu_00417 | 164844 | 166331 | 1488  | 0.68  | 100   |
| scaffold00616 | 61228  | 84143  | 22916 | 19.38 | C_unshiu_00417 | 122206 | 145085 | 22880 | 10.43 | 99.57 |
| scaffold00616 | 83923  | 90894  | 6972  | 5.9   | C_unshiu_02095 | 6972   | 1      | 6972  | 18.96 | 100   |
| scaffold00616 | 90515  | 96798  | 6284  | 5.31  | C_unshiu_03060 | 11094  | 4811   | 6284  | 56.64 | 100   |
| scaffold00616 | 97553  | 99075  | 1523  | 1.29  | C_unshiu_03060 | 3852   | 2330   | 1523  | 13.73 | 100   |
| scaffold00616 | 100826 | 101828 | 1003  | 0.85  | C_unshiu_00061 | 204246 | 203247 | 1000  | 0.17  | 98.5  |
| scaffold00617 | 2972   | 44424  | 41453 | 35.12 | C_unshiu_00357 | 5596   | 47019  | 41424 | 17.46 | 99.91 |
| scaffold00617 | 44952  | 114992 | 70041 | 59.34 | C_unshiu_00357 | 47234  | 117236 | 70003 | 29.5  | 99.95 |
| scaffold00618 | 1      | 1999   | 1999  | 1.7   | C_unshiu_00646 | 150098 | 148107 | 1992  | 1.26  | 98.8  |
| scaffold00618 | 3162   | 4481   | 1320  | 1.13  | C_unshiu_00646 | 146481 | 145163 | 1319  | 0.84  | 99.7  |
| scaffold00618 | 6927   | 8546   | 1620  | 1.38  | C_unshiu_00123 | 386793 | 388412 | 1620  | 0.39  | 100   |
| scaffold00618 | 25254  | 28759  | 3506  | 2.99  | C_unshiu_02751 | 169    | 3652   | 3484  | 18.3  | 99.12 |
| scaffold00618 | 30069  | 31745  | 1677  | 1.43  | C_unshiu_02751 | 5933   | 7609   | 1677  | 8.81  | 99.11 |
| scaffold00618 | 35295  | 37313  | 2019  | 1.72  | C_unshiu_00646 | 140463 | 138456 | 2008  | 1.27  | 98.32 |
| scaffold00618 | 38347  | 41217  | 2871  | 2.45  | C_unshiu_00646 | 117204 | 114334 | 2871  | 1.82  | 99.9  |
| scaffold00618 | 42598  | 65629  | 23032 | 19.64 | C_unshiu_00646 | 112489 | 89459  | 23031 | 14.58 | 99.85 |
| scaffold00618 | 66083  | 80263  | 14181 | 12.09 | C_unshiu_00646 | 88707  | 74521  | 14187 | 8.98  | 99.68 |
| scaffold00618 | 80427  | 87908  | 7482  | 6.38  | C_unshiu_00646 | 74417  | 66907  | 7511  | 4.76  | 98.82 |
| scaffold00618 | 87909  | 92442  | 4534  | 3.87  | C_unshiu_00646 | 66421  | 61890  | 4532  | 2.87  | 99.16 |
| scaffold00618 | 92225  | 100541 | 8317  | 7.09  | C_unshiu_00646 | 62029  | 53713  | 8317  | 5.27  | 99.92 |

|               |        |        |       |       |                |        |        |       |       |       |
|---------------|--------|--------|-------|-------|----------------|--------|--------|-------|-------|-------|
| scaffold00618 | 100564 | 110512 | 9949  | 8.48  | C_unshiu_00646 | 52981  | 43004  | 9978  | 6.32  | 99.03 |
| scaffold00618 | 114309 | 117269 | 2961  | 2.52  | C_unshiu_00610 | 47371  | 50331  | 2961  | 1.79  | 99.8  |
| scaffold00619 | 1      | 53989  | 53989 | 46.08 | C_unshiu_00176 | 242237 | 296220 | 53984 | 14.93 | 99.97 |
| scaffold00619 | 54611  | 93946  | 39336 | 33.57 | C_unshiu_00176 | 297273 | 336611 | 39339 | 10.88 | 99.99 |
| scaffold00619 | 93414  | 113793 | 20380 | 17.39 | C_unshiu_00176 | 341079 | 361456 | 20378 | 5.64  | 99.89 |
| scaffold00620 | 17884  | 19652  | 1769  | 1.51  | C_unshiu_00157 | 235784 | 234006 | 1779  | 0.47  | 98.99 |
| scaffold00620 | 22657  | 28266  | 5610  | 4.8   | C_unshiu_00157 | 230852 | 225237 | 5616  | 1.49  | 99.52 |
| scaffold00620 | 28393  | 36160  | 7768  | 6.65  | C_unshiu_00157 | 225058 | 217267 | 7792  | 2.07  | 99.26 |
| scaffold00620 | 36156  | 42672  | 6517  | 5.58  | C_unshiu_00157 | 215995 | 209486 | 6510  | 1.73  | 98.21 |
| scaffold00620 | 45608  | 46867  | 1260  | 1.08  | C_unshiu_00966 | 47208  | 48467  | 1260  | 1.14  | 100   |
| scaffold00620 | 46862  | 85779  | 38918 | 33.31 | C_unshiu_00157 | 205092 | 166133 | 38960 | 10.34 | 98.96 |
| scaffold00620 | 89953  | 97364  | 7412  | 6.34  | C_unshiu_01441 | 31619  | 39024  | 7406  | 10.99 | 99.8  |
| scaffold00620 | 111122 | 113475 | 2354  | 2.01  | C_unshiu_01441 | 50582  | 48229  | 2354  | 3.49  | 100   |
| scaffold00620 | 114264 | 115330 | 1067  | 0.91  | C_unshiu_01441 | 42798  | 43873  | 1076  | 1.6   | 98.23 |
| scaffold00620 | 115533 | 116835 | 1303  | 1.12  | C_unshiu_01441 | 43865  | 45150  | 1286  | 1.91  | 98.39 |
| scaffold00621 | 2076   | 3909   | 1834  | 1.57  | C_unshiu_00329 | 191468 | 193300 | 1833  | 0.73  | 99.67 |
| scaffold00621 | 15582  | 22894  | 7313  | 6.26  | C_unshiu_00329 | 200338 | 207679 | 7342  | 2.91  | 98.39 |
| scaffold00621 | 28590  | 33574  | 4985  | 4.27  | C_unshiu_00197 | 150508 | 145523 | 4986  | 1.48  | 99.76 |
| scaffold00621 | 48842  | 54060  | 5219  | 4.47  | C_unshiu_00197 | 125892 | 120660 | 5233  | 1.55  | 98.61 |
| scaffold00621 | 61537  | 64476  | 2940  | 2.52  | C_unshiu_02882 | 1      | 2940   | 2940  | 18.22 | 99.35 |
| scaffold00621 | 65293  | 72102  | 6810  | 5.83  | C_unshiu_02882 | 3708   | 10495  | 6788  | 42.07 | 99.54 |
| scaffold00621 | 73996  | 76154  | 2159  | 1.85  | C_unshiu_02882 | 12875  | 15033  | 2159  | 13.38 | 100   |
| scaffold00621 | 86935  | 108161 | 21227 | 18.16 | C_unshiu_00558 | 1948   | 23202  | 21255 | 12.07 | 99.73 |
| scaffold00623 | 915    | 1954   | 1040  | 0.89  | C_unshiu_01263 | 4890   | 5929   | 1040  | 1.3   | 99.71 |
| scaffold00623 | 4554   | 6235   | 1682  | 1.45  | C_unshiu_00046 | 441913 | 440222 | 1692  | 0.27  | 99.41 |
| scaffold00623 | 9536   | 10782  | 1247  | 1.07  | C_unshiu_01263 | 13436  | 14683  | 1248  | 1.56  | 99.84 |
| scaffold00623 | 11115  | 13558  | 2444  | 2.1   | C_unshiu_01263 | 15566  | 18009  | 2444  | 3.06  | 99.88 |
| scaffold00623 | 13554  | 16878  | 3325  | 2.86  | C_unshiu_01263 | 22691  | 26007  | 3317  | 4.15  | 99.07 |
| scaffold00623 | 21087  | 26294  | 5208  | 4.48  | C_unshiu_01263 | 29748  | 34955  | 5208  | 6.52  | 100   |
| scaffold00623 | 26307  | 30132  | 3826  | 3.29  | C_unshiu_01263 | 35825  | 39650  | 3826  | 4.79  | 100   |
| scaffold00623 | 31248  | 34561  | 3314  | 2.85  | C_unshiu_01499 | 20696  | 17384  | 3313  | 5.23  | 99.4  |
| scaffold00623 | 36009  | 48842  | 12834 | 11.04 | C_unshiu_01499 | 15687  | 2818   | 12870 | 20.32 | 99.06 |
| scaffold00623 | 43536  | 56973  | 13438 | 11.56 | C_unshiu_01263 | 59409  | 72867  | 13459 | 16.85 | 99.63 |
| scaffold00623 | 60674  | 66453  | 5780  | 4.97  | C_unshiu_00046 | 493250 | 487462 | 5789  | 0.91  | 99.16 |
| scaffold00623 | 67891  | 84772  | 16882 | 14.52 | C_unshiu_00046 | 484855 | 467944 | 16912 | 2.66  | 99.42 |
| scaffold00623 | 86275  | 88067  | 1793  | 1.54  | C_unshiu_00046 | 427755 | 425962 | 1794  | 0.28  | 99.44 |
| scaffold00623 | 86847  | 101238 | 14392 | 12.38 | C_unshiu_00046 | 466306 | 451916 | 14391 | 2.26  | 99.85 |
| scaffold00623 | 105659 | 110504 | 4846  | 4.17  | C_unshiu_00046 | 448382 | 443534 | 4849  | 0.76  | 99.61 |
| scaffold00623 | 108176 | 112813 | 4638  | 3.99  | C_unshiu_01263 | 1      | 4688   | 4688  | 5.87  | 98.68 |
| scaffold00624 | 184    | 18554  | 18371 | 15.8  | C_unshiu_00734 | 113550 | 95193  | 18358 | 13.28 | 99.82 |
| scaffold00624 | 18585  | 42168  | 23584 | 20.29 | C_unshiu_00734 | 94754  | 71171  | 23584 | 17.06 | 100   |
| scaffold00624 | 47289  | 85514  | 38226 | 32.88 | C_unshiu_00734 | 66667  | 28456  | 38212 | 27.64 | 99.96 |
| scaffold00625 | 1      | 2399   | 2399  | 2.07  | C_unshiu_00160 | 55333  | 52970  | 2364  | 0.64  | 98.29 |
| scaffold00625 | 3884   | 25173  | 21290 | 18.33 | C_unshiu_01182 | 87195  | 65907  | 21289 | 24.42 | 99.92 |
| scaffold00625 | 38412  | 56765  | 18354 | 15.8  | C_unshiu_01333 | 19230  | 975    | 18256 | 24.34 | 98.92 |
| scaffold00625 | 73003  | 77189  | 4187  | 3.6   | C_unshiu_00160 | 62469  | 66655  | 4187  | 1.13  | 100   |
| scaffold00625 | 105785 | 113026 | 7242  | 6.23  | C_unshiu_00317 | 248162 | 240918 | 7245  | 2.81  | 99.88 |
| scaffold00626 | 5725   | 25161  | 19437 | 16.84 | C_unshiu_02614 | 19437  | 1      | 19437 | 89.27 | 100   |
| scaffold00626 | 28558  | 40216  | 11659 | 10.1  | C_unshiu_00366 | 31     | 11749  | 11719 | 5.01  | 98.54 |
| scaffold00626 | 49550  | 53129  | 3580  | 3.1   | C_unshiu_00366 | 20941  | 24520  | 3580  | 1.53  | 99.94 |
| scaffold00626 | 82154  | 84213  | 2060  | 1.79  | C_unshiu_00366 | 117630 | 115571 | 2060  | 0.88  | 99.76 |
| scaffold00626 | 84376  | 93585  | 9210  | 7.98  | C_unshiu_00366 | 114739 | 105533 | 9207  | 3.94  | 99.91 |
| scaffold00626 | 93587  | 94800  | 1214  | 1.05  | C_unshiu_00366 | 105426 | 104214 | 1213  | 0.52  | 99.92 |
| scaffold00627 | 3067   | 9007   | 5941  | 5.15  | C_unshiu_01068 | 19239  | 13313  | 5927  | 6     | 99.26 |
| scaffold00627 | 9005   | 13848  | 4844  | 4.2   | C_unshiu_01068 | 13249  | 8402   | 4848  | 4.9   | 99.83 |
| scaffold00627 | 14451  | 18764  | 4314  | 3.74  | C_unshiu_01068 | 7272   | 2956   | 4317  | 4.37  | 99.79 |
| scaffold00627 | 20805  | 22769  | 1965  | 1.7   | C_unshiu_01068 | 23396  | 25355  | 1960  | 1.98  | 98.17 |
| scaffold00627 | 41983  | 49335  | 7353  | 6.37  | C_unshiu_01802 | 41068  | 48420  | 7353  | 15.19 | 99.4  |
| scaffold00627 | 54967  | 58110  | 3144  | 2.73  | C_unshiu_01180 | 64431  | 61288  | 3144  | 3.6   | 100   |
| scaffold00627 | 58272  | 63862  | 5591  | 4.85  | C_unshiu_01180 | 60980  | 55391  | 5590  | 6.4   | 99.93 |
| scaffold00627 | 63691  | 107997 | 44307 | 38.4  | C_unshiu_01180 | 55351  | 11049  | 44303 | 50.75 | 99.97 |
| scaffold00627 | 112900 | 115376 | 2477  | 2.15  | C_unshiu_01180 | 5725   | 3249   | 2477  | 2.84  | 100   |
| scaffold00628 | 18923  | 22584  | 3662  | 3.18  | C_unshiu_00837 | 24853  | 28525  | 3673  | 2.96  | 99.67 |
| scaffold00628 | 23774  | 24991  | 1218  | 1.06  | C_unshiu_00837 | 29219  | 30436  | 1218  | 0.98  | 98.2  |
| scaffold00628 | 25117  | 28763  | 3647  | 3.16  | C_unshiu_00837 | 31006  | 34658  | 3653  | 2.94  | 99.84 |
| scaffold00628 | 73775  | 77183  | 3409  | 2.96  | C_unshiu_01113 | 49067  | 52475  | 3409  | 3.6   | 100   |
| scaffold00628 | 87977  | 93340  | 5364  | 4.65  | C_unshiu_00837 | 48941  | 43569  | 5373  | 4.33  | 99.14 |
| scaffold00628 | 98982  | 101284 | 2303  | 2     | C_unshiu_00837 | 39880  | 37582  | 2299  | 1.85  | 98.31 |
| scaffold00630 | 15048  | 24396  | 9349  | 8.13  | C_unshiu_01574 | 57825  | 48417  | 9409  | 15.97 | 98.38 |
| scaffold00630 | 24498  | 44051  | 19554 | 17    | C_unshiu_01574 | 48274  | 28723  | 19552 | 33.19 | 99.89 |
| scaffold00630 | 43389  | 54144  | 10756 | 9.35  | C_unshiu_01437 | 23681  | 34467  | 10787 | 15.9  | 99.51 |
| scaffold00630 | 55210  | 57174  | 1965  | 1.71  | C_unshiu_01437 | 36144  | 38110  | 1967  | 2.9   | 99.29 |
| scaffold00630 | 57196  | 58503  | 1308  | 1.14  | C_unshiu_01437 | 38547  | 39854  | 1308  | 1.93  | 99.85 |
| scaffold00630 | 89883  | 93502  | 3620  | 3.15  | C_unshiu_01094 | 51799  | 48182  | 3618  | 3.75  | 98.87 |
| scaffold00630 | 96980  | 98242  | 1263  | 1.1   | C_unshiu_01045 | 31619  | 32881  | 1263  | 1.25  | 100   |
| scaffold00630 | 110608 | 113402 | 2795  | 2.43  | C_unshiu_00573 | 40450  | 43245  | 2796  | 1.62  | 99.43 |
| scaffold00630 | 111711 | 114994 | 3284  | 2.86  | C_unshiu_00383 | 190000 | 186714 | 3287  | 1.44  | 98.72 |
| scaffold00631 | 8      | 19541  | 19534 | 17.03 | C_unshiu_00032 | 114304 | 94795  | 19510 | 2.78  | 99.38 |
| scaffold00631 | 20573  | 32592  | 12020 | 10.48 | C_unshiu_00032 | 93284  | 81265  | 12020 | 1.71  | 100   |

|               |        |        |       |       |                |        |        |       |       |       |
|---------------|--------|--------|-------|-------|----------------|--------|--------|-------|-------|-------|
| scaffold00631 | 33383  | 89436  | 56054 | 48.88 | C_unshiu_00032 | 79954  | 23892  | 56063 | 7.98  | 99.95 |
| scaffold00631 | 69427  | 108797 | 39371 | 34.33 | C_unshiu_00032 | 43906  | 4529   | 39378 | 5.6   | 99.94 |
| scaffold00631 | 110656 | 112602 | 1947  | 1.7   | C_unshiu_00032 | 2225   | 277    | 1949  | 0.28  | 99.44 |
| scaffold00632 | 902    | 2149   | 1248  | 1.09  | C_unshiu_00083 | 59174  | 60438  | 1265  | 0.27  | 98.66 |
| scaffold00632 | 2674   | 8088   | 5415  | 4.73  | C_unshiu_00083 | 61262  | 66706  | 5445  | 1.15  | 98.95 |
| scaffold00632 | 14646  | 16998  | 2353  | 2.06  | C_unshiu_01620 | 26497  | 24147  | 2351  | 4.15  | 99.53 |
| scaffold00632 | 16999  | 24831  | 7833  | 6.84  | C_unshiu_02544 | 7833   | 1      | 7833  | 33.4  | 99.14 |
| scaffold00632 | 25164  | 34201  | 9038  | 7.9   | C_unshiu_00674 | 87117  | 78107  | 9011  | 6     | 98.69 |
| scaffold00632 | 31941  | 48603  | 16663 | 14.56 | C_unshiu_02726 | 19337  | 2651   | 16687 | 86.3  | 98.09 |
| scaffold00632 | 52855  | 64301  | 11447 | 10    | C_unshiu_00478 | 143737 | 155157 | 11421 | 5.75  | 98.94 |
| scaffold00632 | 64309  | 110502 | 46194 | 40.36 | C_unshiu_00464 | 19949  | 66138  | 46190 | 22.69 | 99.86 |
| scaffold00635 | 1      | 19755  | 19755 | 17.32 | C_unshiu_00100 | 131656 | 111976 | 19681 | 4.31  | 98.69 |
| scaffold00635 | 22016  | 25343  | 3328  | 2.92  | C_unshiu_00344 | 115079 | 111750 | 3330  | 1.34  | 99.1  |
| scaffold00635 | 31335  | 40457  | 9123  | 8     | C_unshiu_00344 | 105896 | 96776  | 9121  | 3.68  | 99.76 |
| scaffold00635 | 56546  | 67906  | 11361 | 9.96  | C_unshiu_00100 | 96624  | 85213  | 11412 | 2.5   | 98.5  |
| scaffold00635 | 74353  | 80296  | 5944  | 5.21  | C_unshiu_00100 | 77986  | 72055  | 5932  | 1.3   | 98.3  |
| scaffold00636 | 1      | 7011   | 7011  | 6.15  | C_unshiu_00563 | 2275   | 9285   | 7011  | 4     | 100   |
| scaffold00636 | 7178   | 9955   | 2778  | 2.44  | C_unshiu_00563 | 9482   | 12254  | 2773  | 1.58  | 98.1  |
| scaffold00636 | 12490  | 13616  | 1127  | 0.99  | C_unshiu_01548 | 2726   | 1600   | 1127  | 1.86  | 100   |
| scaffold00636 | 15698  | 24030  | 8333  | 7.31  | C_unshiu_01548 | 7187   | 15517  | 8331  | 13.73 | 99.98 |
| scaffold00636 | 24564  | 66075  | 41512 | 36.41 | C_unshiu_01548 | 16381  | 57892  | 41512 | 68.4  | 99.99 |
| scaffold00636 | 66388  | 68037  | 1650  | 1.45  | C_unshiu_01548 | 58221  | 59841  | 1621  | 2.67  | 98.06 |
| scaffold00637 | 1      | 5445   | 5445  | 4.78  | C_unshiu_00011 | 1901   | 7295   | 5395  | 0.56  | 98.86 |
| scaffold00637 | 6551   | 8211   | 1661  | 1.46  | C_unshiu_00011 | 8848   | 10509  | 1662  | 0.17  | 99.82 |
| scaffold00637 | 34333  | 37860  | 3528  | 3.09  | C_unshiu_00270 | 49076  | 45536  | 3541  | 1.26  | 98.7  |
| scaffold00637 | 43883  | 66625  | 22743 | 19.95 | C_unshiu_00270 | 40153  | 17349  | 22805 | 8.12  | 98.24 |
| scaffold00637 | 66793  | 68241  | 1449  | 1.27  | C_unshiu_00270 | 16946  | 15498  | 1449  | 0.52  | 99.72 |
| scaffold00637 | 81300  | 83059  | 1760  | 1.54  | C_unshiu_00270 | 1760   | 1      | 1760  | 0.63  | 100   |
| scaffold00637 | 84589  | 92119  | 7531  | 6.61  | C_unshiu_00358 | 184782 | 177211 | 7572  | 3.19  | 98.35 |
| scaffold00637 | 92181  | 94340  | 2160  | 1.89  | C_unshiu_00358 | 175391 | 173232 | 2160  | 0.91  | 99.26 |
| scaffold00637 | 96167  | 104773 | 8607  | 7.55  | C_unshiu_00358 | 172688 | 164104 | 8585  | 3.62  | 98.69 |
| scaffold00637 | 106393 | 113994 | 7602  | 6.67  | C_unshiu_00358 | 163762 | 156161 | 7602  | 3.21  | 100   |
| scaffold00638 | 2139   | 7020   | 4882  | 4.29  | C_unshiu_01374 | 50306  | 45420  | 4887  | 6.76  | 99.49 |
| scaffold00638 | 7904   | 12231  | 4328  | 3.8   | C_unshiu_01374 | 44139  | 39812  | 4328  | 5.98  | 99.77 |
| scaffold00638 | 12242  | 16900  | 4659  | 4.09  | C_unshiu_01374 | 39343  | 34685  | 4659  | 6.44  | 100   |
| scaffold00638 | 25449  | 29480  | 4032  | 3.54  | C_unshiu_01374 | 28136  | 24102  | 4035  | 5.58  | 98.34 |
| scaffold00638 | 30961  | 36468  | 5508  | 4.84  | C_unshiu_01690 | 16722  | 11215  | 5508  | 10.4  | 100   |
| scaffold00638 | 41716  | 62916  | 21201 | 18.63 | C_unshiu_01336 | 2973   | 24208  | 21236 | 28.38 | 98.39 |
| scaffold00638 | 64749  | 86938  | 22190 | 19.5  | C_unshiu_01336 | 26304  | 48506  | 22203 | 29.67 | 99.07 |
| scaffold00638 | 87713  | 98316  | 10604 | 9.32  | C_unshiu_01336 | 49350  | 59984  | 10635 | 14.21 | 98.84 |
| scaffold00638 | 98374  | 99641  | 1268  | 1.11  | C_unshiu_02867 | 14933  | 13666  | 1268  | 7.71  | 100   |
| scaffold00638 | 99956  | 113777 | 13822 | 12.15 | C_unshiu_00470 | 357    | 14175  | 13819 | 6.87  | 99.69 |
| scaffold00639 | 1      | 2132   | 2132  | 1.88  | C_unshiu_00422 | 107220 | 105089 | 2132  | 0.98  | 99.77 |
| scaffold00639 | 2218   | 6467   | 4250  | 3.74  | C_unshiu_00422 | 104976 | 100727 | 4250  | 1.95  | 99.98 |
| scaffold00639 | 6858   | 12313  | 5456  | 4.81  | C_unshiu_00422 | 99869  | 94410  | 5460  | 2.5   | 99.63 |
| scaffold00639 | 13249  | 30334  | 17086 | 15.05 | C_unshiu_00422 | 89127  | 72005  | 17123 | 7.84  | 99.08 |
| scaffold00639 | 30861  | 35986  | 5126  | 4.52  | C_unshiu_00422 | 70595  | 65509  | 5087  | 2.33  | 98.46 |
| scaffold00639 | 36014  | 37531  | 1518  | 1.34  | C_unshiu_00422 | 65094  | 63577  | 1518  | 0.7   | 100   |
| scaffold00639 | 38138  | 40982  | 2845  | 2.51  | C_unshiu_00422 | 62508  | 59664  | 2845  | 1.3   | 99.89 |
| scaffold00639 | 45526  | 51376  | 5851  | 5.15  | C_unshiu_00422 | 53536  | 47647  | 5890  | 2.7   | 98.27 |
| scaffold00639 | 54914  | 59887  | 4974  | 4.38  | C_unshiu_00422 | 49414  | 44373  | 5042  | 2.31  | 98.31 |
| scaffold00639 | 61764  | 75187  | 13424 | 11.83 | C_unshiu_00422 | 42882  | 29430  | 13453 | 6.16  | 99.18 |
| scaffold00639 | 75445  | 87951  | 12507 | 11.02 | C_unshiu_00422 | 29172  | 16632  | 12541 | 5.74  | 99.5  |
| scaffold00639 | 94180  | 97652  | 3473  | 3.06  | C_unshiu_02570 | 19271  | 22750  | 3480  | 15.29 | 98.14 |
| scaffold00639 | 97656  | 110095 | 12440 | 10.96 | C_unshiu_02570 | 19271  | 6832   | 12440 | 54.67 | 100   |
| scaffold00639 | 112245 | 113522 | 1278  | 1.13  | C_unshiu_02570 | 4471   | 3194   | 1278  | 5.62  | 99.69 |
| scaffold00642 | 1860   | 4108   | 2249  | 2.01  | C_unshiu_01189 | 64738  | 66988  | 2251  | 2.61  | 99.56 |
| scaffold00642 | 4458   | 9649   | 5192  | 4.63  | C_unshiu_01189 | 67632  | 72832  | 5201  | 6.02  | 99.42 |
| scaffold00642 | 9760   | 21679  | 11920 | 10.64 | C_unshiu_01189 | 72985  | 84928  | 11944 | 13.82 | 99.6  |
| scaffold00642 | 24631  | 53722  | 29092 | 25.97 | C_unshiu_00055 | 540099 | 569196 | 29098 | 4.9   | 99.82 |
| scaffold00642 | 54321  | 68401  | 14081 | 12.57 | C_unshiu_00055 | 570298 | 584378 | 14081 | 2.37  | 99.74 |
| scaffold00642 | 68450  | 78522  | 10073 | 8.99  | C_unshiu_00055 | 584295 | 594378 | 10084 | 1.7   | 99.74 |
| scaffold00642 | 84635  | 110714 | 26080 | 23.28 | C_unshiu_01087 | 55153  | 81264  | 26112 | 26.8  | 99.33 |
| scaffold00644 | 17269  | 18360  | 1092  | 0.98  | C_unshiu_02354 | 1      | 1086   | 1086  | 3.84  | 98.44 |
| scaffold00644 | 20255  | 21629  | 1375  | 1.23  | C_unshiu_02354 | 3302   | 4674   | 1373  | 4.86  | 99.49 |
| scaffold00644 | 33191  | 49672  | 16482 | 14.72 | C_unshiu_02354 | 11752  | 28250  | 16499 | 58.4  | 99.56 |
| scaffold00644 | 67152  | 74803  | 7652  | 6.83  | C_unshiu_00188 | 55408  | 47762  | 7647  | 2.22  | 99.01 |
| scaffold00644 | 92816  | 110764 | 17949 | 16.03 | C_unshiu_00188 | 32096  | 14202  | 17895 | 5.19  | 98.33 |
| scaffold00645 | 924    | 3529   | 2606  | 2.35  | C_unshiu_02903 | 4085   | 6690   | 2606  | 16.65 | 100   |
| scaffold00645 | 3841   | 9576   | 5736  | 5.18  | C_unshiu_02903 | 6375   | 12037  | 5663  | 36.17 | 98.62 |
| scaffold00645 | 31876  | 33359  | 1484  | 1.34  | C_unshiu_01189 | 57341  | 55859  | 1483  | 1.72  | 99.93 |
| scaffold00645 | 34505  | 44554  | 10050 | 9.07  | C_unshiu_01189 | 54385  | 44336  | 10050 | 11.63 | 99.99 |
| scaffold00645 | 45528  | 48417  | 2890  | 2.61  | C_unshiu_01189 | 42960  | 40071  | 2890  | 3.34  | 99.86 |
| scaffold00645 | 48561  | 51268  | 2708  | 2.44  | C_unshiu_01189 | 40069  | 37362  | 2708  | 3.13  | 99.78 |
| scaffold00645 | 51818  | 56404  | 4587  | 4.14  | C_unshiu_01189 | 36389  | 31803  | 4587  | 5.31  | 99.98 |
| scaffold00645 | 65199  | 67014  | 1816  | 1.64  | C_unshiu_00715 | 10891  | 12706  | 1816  | 1.28  | 100   |
| scaffold00645 | 68487  | 69532  | 1046  | 0.94  | C_unshiu_00715 | 15030  | 16077  | 1048  | 0.74  | 99.33 |
| scaffold00645 | 69805  | 71066  | 1262  | 1.14  | C_unshiu_00715 | 13136  | 14397  | 1262  | 0.89  | 99.84 |
| scaffold00645 | 71079  | 79818  | 8740  | 7.89  | C_unshiu_01189 | 26145  | 17396  | 8750  | 10.13 | 99.83 |

|               |        |        |       |       |                |        |        |       |       |       |
|---------------|--------|--------|-------|-------|----------------|--------|--------|-------|-------|-------|
| scaffold00645 | 81429  | 89315  | 7887  | 7.12  | C_unshiu_01189 | 15580  | 7693   | 7888  | 9.13  | 99.92 |
| scaffold00645 | 89712  | 92071  | 2360  | 2.13  | C_unshiu_01189 | 7098   | 4739   | 2360  | 2.73  | 99.75 |
| scaffold00645 | 99676  | 109540 | 9865  | 8.9   | C_unshiu_00013 | 717919 | 708055 | 9865  | 1.06  | 99.99 |
| scaffold00645 | 109611 | 110801 | 1191  | 1.07  | C_unshiu_00241 | 206107 | 207298 | 1192  | 0.4   | 98.16 |
| scaffold00646 | 5446   | 11857  | 6412  | 5.81  | C_unshiu_00177 | 354872 | 361282 | 6411  | 1.77  | 99.66 |
| scaffold00646 | 12265  | 20957  | 8693  | 7.88  | C_unshiu_00315 | 38856  | 47521  | 8666  | 3.35  | 98.59 |
| scaffold00646 | 23331  | 39075  | 15745 | 14.27 | C_unshiu_00315 | 50599  | 66339  | 15741 | 6.08  | 98.63 |
| scaffold00646 | 54873  | 75858  | 20986 | 19.02 | C_unshiu_00315 | 82381  | 103399 | 21019 | 8.12  | 98.82 |
| scaffold00646 | 77272  | 78790  | 1519  | 1.38  | C_unshiu_00315 | 105219 | 106737 | 1519  | 0.59  | 100   |
| scaffold00646 | 80420  | 84339  | 3920  | 3.55  | C_unshiu_00315 | 109803 | 113725 | 3923  | 1.52  | 99.39 |
| scaffold00646 | 87930  | 110310 | 22381 | 20.29 | C_unshiu_01246 | 51222  | 28751  | 22472 | 27.64 | 98.44 |
| scaffold00647 | 1      | 2420   | 2420  | 2.19  | C_unshiu_00028 | 81917  | 79497  | 2421  | 0.34  | 98.43 |
| scaffold00647 | 3500   | 5976   | 2477  | 2.25  | C_unshiu_00028 | 77095  | 74620  | 2476  | 0.34  | 99.72 |
| scaffold00647 | 14203  | 17949  | 3747  | 3.4   | C_unshiu_02810 | 13982  | 17676  | 3695  | 20.9  | 98.05 |
| scaffold00647 | 26372  | 36365  | 9994  | 9.06  | C_unshiu_00691 | 80101  | 70128  | 9974  | 6.87  | 99.72 |
| scaffold00647 | 36837  | 54490  | 17654 | 16.01 | C_unshiu_00691 | 69622  | 51925  | 17698 | 12.18 | 98.93 |
| scaffold00647 | 55690  | 60755  | 5066  | 4.59  | C_unshiu_00691 | 51071  | 45990  | 5082  | 3.5   | 98.06 |
| scaffold00647 | 60787  | 74631  | 13845 | 12.55 | C_unshiu_00691 | 45885  | 31999  | 13887 | 9.56  | 99.09 |
| scaffold00648 | 7403   | 29666  | 22264 | 20.31 | C_unshiu_00373 | 1071   | 23325  | 22255 | 9.59  | 99.52 |
| scaffold00648 | 31388  | 35998  | 4611  | 4.21  | C_unshiu_00059 | 114086 | 118696 | 4611  | 0.78  | 100   |
| scaffold00648 | 36430  | 56636  | 20207 | 18.43 | C_unshiu_01164 | 66545  | 86727  | 20183 | 22.53 | 99.82 |
| scaffold00648 | 58958  | 61043  | 2086  | 1.9   | C_unshiu_00760 | 10326  | 12420  | 2095  | 1.55  | 99.24 |
| scaffold00648 | 76382  | 79272  | 2891  | 2.64  | C_unshiu_00225 | 135391 | 138286 | 2896  | 0.93  | 99.45 |
| scaffold00648 | 83151  | 85757  | 2607  | 2.38  | C_unshiu_00225 | 142139 | 144747 | 2609  | 0.83  | 98.7  |
| scaffold00648 | 86395  | 88959  | 2565  | 2.34  | C_unshiu_00225 | 144078 | 146644 | 2567  | 0.82  | 99.07 |
| scaffold00648 | 91185  | 101955 | 10771 | 9.82  | C_unshiu_01657 | 18128  | 7374   | 10755 | 19.58 | 98.04 |
| scaffold00648 | 101975 | 105139 | 3165  | 2.89  | C_unshiu_01657 | 6663   | 3500   | 3164  | 5.76  | 99.72 |
| scaffold00648 | 105541 | 106622 | 1082  | 0.99  | C_unshiu_01657 | 1      | 1086   | 1086  | 1.98  | 98.53 |
| scaffold00649 | 3608   | 10069  | 6462  | 5.9   | C_unshiu_01969 | 12727  | 6266   | 6462  | 15.45 | 100   |
| scaffold00649 | 11930  | 14736  | 2807  | 2.56  | C_unshiu_01969 | 5078   | 2264   | 2815  | 6.73  | 98.12 |
| scaffold00649 | 18578  | 23005  | 4428  | 4.04  | C_unshiu_00310 | 4436   | 1      | 4436  | 1.7   | 99.73 |
| scaffold00649 | 24758  | 26835  | 2078  | 1.9   | C_unshiu_02222 | 32522  | 30445  | 2078  | 6.39  | 98.6  |
| scaffold00649 | 40753  | 51130  | 10378 | 9.47  | C_unshiu_02222 | 19955  | 9566   | 10390 | 31.95 | 98.98 |
| scaffold00649 | 47858  | 57485  | 9628  | 8.79  | C_unshiu_00144 | 295777 | 286153 | 9625  | 2.43  | 98.9  |
| scaffold00649 | 57669  | 58747  | 1079  | 0.98  | C_unshiu_02222 | 169    | 1248   | 1080  | 3.32  | 98.61 |
| scaffold00649 | 62091  | 64590  | 2500  | 2.28  | C_unshiu_00322 | 113676 | 116172 | 2497  | 0.98  | 99.36 |
| scaffold00649 | 66963  | 80175  | 13213 | 12.06 | C_unshiu_01134 | 87150  | 73894  | 13257 | 14.35 | 98.84 |
| scaffold00649 | 89023  | 99905  | 10883 | 9.93  | C_unshiu_01168 | 22192  | 33024  | 10833 | 12.23 | 99.32 |
| scaffold00649 | 105843 | 108975 | 3133  | 2.86  | C_unshiu_01134 | 58311  | 55182  | 3130  | 3.39  | 98.47 |
| scaffold00651 | 1      | 2555   | 2555  | 2.34  | C_unshiu_00782 | 28914  | 26360  | 2555  | 1.95  | 99.92 |
| scaffold00651 | 3739   | 5435   | 1697  | 1.55  | C_unshiu_00782 | 24723  | 23027  | 1697  | 1.3   | 99.94 |
| scaffold00651 | 11023  | 14337  | 3315  | 3.04  | C_unshiu_00782 | 17272  | 13956  | 3317  | 2.53  | 99.85 |
| scaffold00651 | 17335  | 24133  | 6799  | 6.23  | C_unshiu_00782 | 10943  | 4140   | 6804  | 5.2   | 99.85 |
| scaffold00651 | 18293  | 28499  | 10207 | 9.35  | C_unshiu_00244 | 122607 | 132814 | 10208 | 3.4   | 99.96 |
| scaffold00651 | 29092  | 39895  | 10804 | 9.9   | C_unshiu_00244 | 133819 | 144622 | 10804 | 3.6   | 99.78 |
| scaffold00651 | 47181  | 49079  | 1899  | 1.74  | C_unshiu_00782 | 64771  | 62876  | 1896  | 1.45  | 98.79 |
| scaffold00651 | 57268  | 69690  | 12423 | 11.38 | C_unshiu_00782 | 57712  | 45288  | 12425 | 9.49  | 99.81 |
| scaffold00651 | 71044  | 75023  | 3980  | 3.65  | C_unshiu_00245 | 281688 | 277709 | 3980  | 1.33  | 100   |
| scaffold00651 | 81492  | 84194  | 2703  | 2.48  | C_unshiu_00782 | 36741  | 34036  | 2706  | 2.07  | 99.45 |
| scaffold00651 | 84302  | 86627  | 2326  | 2.13  | C_unshiu_00782 | 33901  | 31575  | 2327  | 1.78  | 99.96 |
| scaffold00651 | 86938  | 89421  | 2484  | 2.28  | C_unshiu_00782 | 31370  | 28875  | 2496  | 1.91  | 99.28 |
| scaffold00651 | 101916 | 103004 | 1089  | 1     | C_unshiu_00482 | 110639 | 109551 | 1089  | 0.55  | 99.72 |
| scaffold00652 | 6      | 95066  | 95061 | 87.24 | C_unshiu_01036 | 3623   | 98668  | 95046 | 92.6  | 99.92 |
| scaffold00653 | 12706  | 17205  | 4500  | 4.16  | C_unshiu_01615 | 51261  | 46786  | 4476  | 7.87  | 99.2  |
| scaffold00653 | 32064  | 39683  | 7620  | 7.04  | C_unshiu_00346 | 247647 | 240028 | 7620  | 3.08  | 100   |
| scaffold00653 | 41996  | 51469  | 9474  | 8.75  | C_unshiu_00346 | 237294 | 227821 | 9474  | 3.83  | 100   |
| scaffold00653 | 52536  | 64056  | 11521 | 10.64 | C_unshiu_00346 | 226568 | 215047 | 11522 | 4.65  | 99.98 |
| scaffold00653 | 69382  | 70688  | 1307  | 1.21  | C_unshiu_00346 | 210503 | 209194 | 1310  | 0.53  | 98.4  |
| scaffold00653 | 84207  | 87571  | 3365  | 3.11  | C_unshiu_00346 | 198379 | 195015 | 3365  | 1.36  | 99.97 |
| scaffold00653 | 88183  | 93843  | 5661  | 5.23  | C_unshiu_00520 | 165297 | 159637 | 5661  | 3.05  | 100   |
| scaffold00653 | 93835  | 96663  | 2829  | 2.61  | C_unshiu_00346 | 189874 | 187043 | 2832  | 1.14  | 99.68 |
| scaffold00653 | 97512  | 103172 | 5661  | 5.23  | C_unshiu_00346 | 185856 | 180165 | 5692  | 2.3   | 99.24 |
| scaffold00653 | 103808 | 106646 | 2839  | 2.62  | C_unshiu_00066 | 121163 | 124001 | 2839  | 0.52  | 99.75 |
| scaffold00653 | 106791 | 108296 | 1506  | 1.39  | C_unshiu_00346 | 177406 | 175900 | 1507  | 0.61  | 99.8  |
| scaffold00654 | 41679  | 54425  | 12747 | 11.77 | C_unshiu_02577 | 18429  | 5666   | 12764 | 56.42 | 99.59 |
| scaffold00654 | 54432  | 56483  | 2052  | 1.89  | C_unshiu_02577 | 5284   | 3233   | 2052  | 9.07  | 100   |
| scaffold00654 | 57496  | 84825  | 27330 | 25.24 | C_unshiu_01299 | 38835  | 66154  | 27320 | 35.22 | 98.9  |
| scaffold00654 | 76750  | 104323 | 27574 | 25.46 | C_unshiu_00264 | 173384 | 200938 | 27555 | 9.68  | 99.31 |
| scaffold00656 | 1      | 1242   | 1242  | 1.15  | C_unshiu_00530 | 28863  | 30104  | 1242  | 0.67  | 100   |
| scaffold00656 | 1466   | 3239   | 1774  | 1.64  | C_unshiu_00530 | 33357  | 35127  | 1771  | 0.96  | 99.44 |
| scaffold00656 | 22614  | 28027  | 5414  | 5.02  | C_unshiu_00530 | 47887  | 53330  | 5444  | 2.96  | 99.36 |
| scaffold00656 | 35223  | 37047  | 1825  | 1.69  | C_unshiu_00678 | 95006  | 93182  | 1825  | 1.23  | 99.51 |
| scaffold00656 | 37695  | 47610  | 9916  | 9.19  | C_unshiu_00678 | 92128  | 82233  | 9896  | 6.64  | 98.97 |
| scaffold00656 | 69513  | 71816  | 2304  | 2.13  | C_unshiu_00678 | 60660  | 58357  | 2304  | 1.55  | 99.61 |
| scaffold00656 | 77041  | 83996  | 6956  | 6.45  | C_unshiu_01888 | 45079  | 38074  | 7006  | 15.54 | 98.66 |
| scaffold00656 | 84007  | 89302  | 5296  | 4.91  | C_unshiu_00678 | 45474  | 40178  | 5297  | 3.56  | 99.98 |
| scaffold00656 | 89385  | 90712  | 1328  | 1.23  | C_unshiu_00678 | 39376  | 38049  | 1328  | 0.89  | 100   |
| scaffold00657 | 3      | 43828  | 43826 | 40.65 | C_unshiu_01618 | 3977   | 47764  | 43788 | 77.25 | 99.26 |
| scaffold00657 | 44937  | 52394  | 7458  | 6.92  | C_unshiu_01618 | 49215  | 56681  | 7467  | 13.17 | 99.72 |

|               |        |        |       |       |                |         |         |       |       |       |
|---------------|--------|--------|-------|-------|----------------|---------|---------|-------|-------|-------|
| scaffold00657 | 48527  | 73792  | 25266 | 23.43 | C_unshiu_00556 | 153719  | 128466  | 25254 | 14.28 | 99.76 |
| scaffold00657 | 79423  | 103659 | 24237 | 22.48 | C_unshiu_00556 | 123000  | 98816   | 24185 | 13.67 | 99.59 |
| scaffold00658 | 4386   | 11958  | 7573  | 7.03  | C_unshiu_00471 | 196030  | 188435  | 7596  | 3.78  | 99.46 |
| scaffold00658 | 11979  | 13987  | 2009  | 1.86  | C_unshiu_00471 | 187084  | 185077  | 2008  | 1     | 99.75 |
| scaffold00658 | 16339  | 25846  | 9508  | 8.82  | C_unshiu_01475 | 62141   | 52615   | 9527  | 14.69 | 99.11 |
| scaffold00658 | 30861  | 34949  | 4089  | 3.79  | C_unshiu_01475 | 48175   | 44083   | 4093  | 6.31  | 99.78 |
| scaffold00658 | 41881  | 62287  | 20407 | 18.94 | C_unshiu_00258 | 28650   | 49002   | 20353 | 7.05  | 99.58 |
| scaffold00658 | 68511  | 69963  | 1453  | 1.35  | C_unshiu_01472 | 32977   | 31525   | 1453  | 2.23  | 100   |
| scaffold00658 | 69958  | 87789  | 17832 | 16.55 | C_unshiu_00300 | 247057  | 264873  | 17817 | 6.7   | 99.78 |
| scaffold00658 | 101004 | 102858 | 1855  | 1.72  | C_unshiu_01026 | 73669   | 75528   | 1860  | 1.8   | 98.92 |
| scaffold00659 | 5887   | 10855  | 4969  | 4.63  | C_unshiu_00008 | 1007990 | 1012956 | 4967  | 0.46  | 99.28 |
| scaffold00659 | 17706  | 31477  | 13772 | 12.82 | C_unshiu_01927 | 39693   | 25924   | 13770 | 31.41 | 99.99 |
| scaffold00659 | 32305  | 37022  | 4718  | 4.39  | C_unshiu_01927 | 24547   | 19829   | 4719  | 10.76 | 99.98 |
| scaffold00659 | 37040  | 55185  | 18146 | 16.9  | C_unshiu_01927 | 18108   | 1       | 18108 | 41.3  | 99.48 |
| scaffold00659 | 59901  | 80038  | 20138 | 18.75 | C_unshiu_01002 | 1       | 20138   | 20138 | 19.03 | 99.91 |
| scaffold00659 | 79543  | 86715  | 7173  | 6.68  | C_unshiu_01002 | 20138   | 27318   | 7181  | 6.79  | 99.72 |
| scaffold00659 | 90778  | 95851  | 5074  | 4.73  | C_unshiu_00149 | 348296  | 353354  | 5059  | 1.31  | 99.21 |
| scaffold00659 | 99990  | 102475 | 2486  | 2.32  | C_unshiu_00149 | 358303  | 360788  | 2486  | 0.64  | 99.6  |
| scaffold00660 | 7560   | 13468  | 5909  | 5.53  | C_unshiu_00879 | 65021   | 70923   | 5903  | 4.94  | 98.45 |
| scaffold00660 | 13342  | 14697  | 1356  | 1.27  | C_unshiu_01150 | 68186   | 69541   | 1356  | 1.49  | 100   |
| scaffold00660 | 16787  | 22108  | 5322  | 4.98  | C_unshiu_01150 | 72277   | 77608   | 5332  | 5.87  | 98.95 |
| scaffold00660 | 23513  | 24732  | 1220  | 1.14  | C_unshiu_00879 | 80597   | 81820   | 1224  | 1.02  | 98.45 |
| scaffold00660 | 30188  | 34029  | 3842  | 3.6   | C_unshiu_01150 | 80163   | 83985   | 3823  | 4.21  | 98.96 |
| scaffold00660 | 39931  | 41792  | 1862  | 1.74  | C_unshiu_01913 | 10325   | 12186   | 1862  | 4.21  | 100   |
| scaffold00660 | 46684  | 48485  | 1802  | 1.69  | C_unshiu_01211 | 6440    | 8242    | 1803  | 2.14  | 99.61 |
| scaffold00660 | 59846  | 61002  | 1157  | 1.08  | C_unshiu_00082 | 263601  | 262445  | 1157  | 0.24  | 99.74 |
| scaffold00660 | 69764  | 75284  | 5521  | 5.17  | C_unshiu_01093 | 3839    | 9357    | 5519  | 5.72  | 99.76 |
| scaffold00660 | 75733  | 80534  | 4802  | 4.49  | C_unshiu_01902 | 13113   | 8313    | 4801  | 10.75 | 99.54 |
| scaffold00660 | 81092  | 85040  | 3949  | 3.7   | C_unshiu_01902 | 7602    | 3654    | 3949  | 8.84  | 100   |
| scaffold00660 | 93442  | 97097  | 3656  | 3.42  | C_unshiu_01327 | 1422    | 5077    | 3656  | 4.86  | 99.62 |
| scaffold00660 | 97344  | 99884  | 2541  | 2.38  | C_unshiu_03084 | 7382    | 9901    | 2520  | 25.45 | 98.78 |
| scaffold00661 | 1      | 6535   | 6535  | 6.14  | C_unshiu_01637 | 21807   | 15272   | 6536  | 11.76 | 99.95 |
| scaffold00661 | 6110   | 21545  | 15436 | 14.5  | C_unshiu_01637 | 15253   | 1       | 15253 | 27.43 | 98.66 |
| scaffold00661 | 31599  | 33345  | 1747  | 1.64  | C_unshiu_02293 | 16165   | 17894   | 1730  | 5.76  | 98.51 |
| scaffold00661 | 33361  | 45216  | 11856 | 11.14 | C_unshiu_02293 | 18198   | 30054   | 11857 | 39.45 | 99.99 |
| scaffold00661 | 78679  | 92072  | 13394 | 12.58 | C_unshiu_00138 | 23546   | 10195   | 13352 | 3.31  | 99.39 |
| scaffold00661 | 92203  | 97152  | 4950  | 4.65  | C_unshiu_00138 | 9664    | 4715    | 4950  | 1.23  | 100   |
| scaffold00661 | 97553  | 99691  | 2139  | 2.01  | C_unshiu_00138 | 4017    | 1879    | 2139  | 0.53  | 99.53 |
| scaffold00661 | 99845  | 101281 | 1437  | 1.35  | C_unshiu_00138 | 1438    | 1       | 1438  | 0.36  | 99.37 |
| scaffold00661 | 100474 | 105666 | 5193  | 4.88  | C_unshiu_00264 | 43470   | 48619   | 5150  | 1.81  | 98.54 |
| scaffold00662 | 746    | 4961   | 4216  | 3.96  | C_unshiu_00598 | 36721   | 40933   | 4213  | 2.51  | 99.27 |
| scaffold00662 | 15359  | 19998  | 4640  | 4.36  | C_unshiu_01166 | 61142   | 65780   | 4639  | 5.2   | 99.72 |
| scaffold00662 | 21150  | 23136  | 1987  | 1.87  | C_unshiu_01166 | 67313   | 69299   | 1987  | 2.23  | 98.79 |
| scaffold00662 | 27970  | 29628  | 1659  | 1.56  | C_unshiu_01001 | 15284   | 16943   | 1660  | 1.57  | 99.94 |
| scaffold00662 | 29619  | 30914  | 1296  | 1.22  | C_unshiu_01166 | 75141   | 76434   | 1294  | 1.45  | 98.23 |
| scaffold00662 | 33396  | 35033  | 1638  | 1.54  | C_unshiu_01166 | 78810   | 80450   | 1641  | 1.84  | 98.84 |
| scaffold00662 | 51394  | 56369  | 4976  | 4.67  | C_unshiu_00830 | 1       | 4914    | 4914  | 3.94  | 98.35 |
| scaffold00662 | 60668  | 71477  | 10810 | 10.16 | C_unshiu_00830 | 8732    | 19539   | 10808 | 8.66  | 98.86 |
| scaffold00662 | 71261  | 78993  | 7733  | 7.26  | C_unshiu_00830 | 19449   | 27182   | 7734  | 6.19  | 99.92 |
| scaffold00662 | 79129  | 82637  | 3509  | 3.3   | C_unshiu_00830 | 27686   | 31195   | 3510  | 2.81  | 99.8  |
| scaffold00662 | 84679  | 87890  | 3212  | 3.02  | C_unshiu_00830 | 33655   | 36862   | 3208  | 2.57  | 99.66 |
| scaffold00662 | 90955  | 95702  | 4748  | 4.46  | C_unshiu_00258 | 9277    | 14024   | 4748  | 1.64  | 98.34 |
| scaffold00662 | 96415  | 98796  | 2382  | 2.24  | C_unshiu_00258 | 14199   | 16581   | 2383  | 0.83  | 99.45 |
| scaffold00663 | 761    | 5812   | 5052  | 4.75  | C_unshiu_00616 | 81245   | 76227   | 5019  | 3.06  | 98.71 |
| scaffold00663 | 9118   | 10697  | 1580  | 1.49  | C_unshiu_00616 | 72322   | 70741   | 1582  | 0.97  | 98.23 |
| scaffold00663 | 11635  | 17812  | 6178  | 5.81  | C_unshiu_00616 | 61907   | 55721   | 6187  | 3.77  | 98.56 |
| scaffold00663 | 17915  | 27914  | 10000 | 9.4   | C_unshiu_00616 | 55582   | 45554   | 10029 | 6.12  | 99.44 |
| scaffold00663 | 27939  | 32966  | 5028  | 4.73  | C_unshiu_00616 | 43470   | 38448   | 5023  | 3.06  | 98.59 |
| scaffold00663 | 33431  | 34955  | 1525  | 1.43  | C_unshiu_00616 | 37383   | 35857   | 1527  | 0.93  | 99.35 |
| scaffold00663 | 34963  | 49951  | 14989 | 14.09 | C_unshiu_00616 | 35477   | 20503   | 14975 | 9.13  | 98.37 |
| scaffold00663 | 51067  | 64083  | 13017 | 12.24 | C_unshiu_00616 | 19303   | 6193    | 13111 | 8     | 98.46 |
| scaffold00663 | 65258  | 74346  | 9089  | 8.55  | C_unshiu_00728 | 9423    | 18559   | 9137  | 6.57  | 98    |
| scaffold00663 | 93272  | 94997  | 1726  | 1.62  | C_unshiu_00728 | 43539   | 45265   | 1727  | 1.24  | 99.02 |
| scaffold00663 | 94997  | 96479  | 1483  | 1.39  | C_unshiu_00728 | 47418   | 48904   | 1487  | 1.07  | 99.73 |
| scaffold00664 | 14370  | 15558  | 1189  | 1.12  | C_unshiu_00120 | 328056  | 329243  | 1188  | 0.28  | 98.99 |
| scaffold00664 | 15733  | 18935  | 3203  | 3.02  | C_unshiu_00120 | 329226  | 332427  | 3202  | 0.76  | 99.97 |
| scaffold00664 | 23180  | 26301  | 3122  | 2.94  | C_unshiu_00737 | 31125   | 28005   | 3121  | 2.26  | 99.68 |
| scaffold00664 | 26312  | 31826  | 5515  | 5.19  | C_unshiu_00737 | 27604   | 22097   | 5508  | 3.99  | 99.37 |
| scaffold00664 | 32294  | 37508  | 5215  | 4.91  | C_unshiu_00737 | 21256   | 16042   | 5215  | 3.78  | 100   |
| scaffold00664 | 39189  | 40215  | 1027  | 0.97  | C_unshiu_00737 | 13751   | 12724   | 1028  | 0.74  | 99.22 |
| scaffold00664 | 40664  | 48574  | 7911  | 7.45  | C_unshiu_01331 | 58267   | 50377   | 7891  | 10.5  | 99.03 |
| scaffold00664 | 55183  | 63259  | 8077  | 7.6   | C_unshiu_02497 | 8082    | 1       | 8082  | 32.81 | 98.75 |
| scaffold00664 | 63358  | 78666  | 15309 | 14.41 | C_unshiu_01331 | 37307   | 21942   | 15366 | 20.44 | 98.74 |
| scaffold00664 | 95229  | 101263 | 6035  | 5.68  | C_unshiu_02398 | 3725    | 9730    | 6006  | 21.97 | 98.66 |
| scaffold00664 | 103421 | 104561 | 1141  | 1.07  | C_unshiu_02398 | 12671   | 13811   | 1141  | 4.17  | 99.74 |
| scaffold00664 | 104887 | 106210 | 1324  | 1.25  | C_unshiu_00046 | 515539  | 516862  | 1324  | 0.21  | 99.7  |
| scaffold00665 | 1779   | 3203   | 1425  | 1.34  | C_unshiu_03018 | 4779    | 3342    | 1438  | 11.55 | 98.68 |
| scaffold00665 | 8029   | 10795  | 2767  | 2.61  | C_unshiu_00294 | 99722   | 102486  | 2765  | 1.03  | 98.95 |
| scaffold00665 | 10796  | 26932  | 16137 | 15.21 | C_unshiu_00294 | 102705  | 118840  | 16136 | 5.99  | 99.78 |

|               |        |        |       |       |                |        |        |       |       |       |
|---------------|--------|--------|-------|-------|----------------|--------|--------|-------|-------|-------|
| scaffold00665 | 29612  | 40223  | 10612 | 10.01 | C_unshiu_00294 | 122015 | 132627 | 10613 | 3.94  | 99.58 |
| scaffold00665 | 42343  | 46000  | 3658  | 3.45  | C_unshiu_00294 | 135490 | 139150 | 3661  | 1.36  | 99.67 |
| scaffold00665 | 46185  | 49404  | 3220  | 3.04  | C_unshiu_00294 | 139530 | 142755 | 3226  | 1.2   | 99.63 |
| scaffold00665 | 50343  | 51564  | 1222  | 1.15  | C_unshiu_00294 | 144030 | 145251 | 1222  | 0.45  | 99.92 |
| scaffold00665 | 51754  | 53621  | 1868  | 1.76  | C_unshiu_00294 | 145726 | 147593 | 1868  | 0.69  | 100   |
| scaffold00665 | 53639  | 55784  | 2146  | 2.02  | C_unshiu_00294 | 148573 | 150718 | 2146  | 0.8   | 99.67 |
| scaffold00665 | 63475  | 64705  | 1231  | 1.16  | C_unshiu_00294 | 158572 | 159801 | 1230  | 0.46  | 99.84 |
| scaffold00665 | 64749  | 65834  | 1086  | 1.02  | C_unshiu_00294 | 160086 | 161171 | 1086  | 0.4   | 99.26 |
| scaffold00665 | 67072  | 77863  | 10792 | 10.18 | C_unshiu_00294 | 161092 | 171883 | 10792 | 4.01  | 99.99 |
| scaffold00665 | 77946  | 106061 | 28116 | 26.51 | C_unshiu_00294 | 171995 | 200126 | 28132 | 10.44 | 99.9  |
| scaffold00666 | 15851  | 17838  | 1988  | 1.88  | C_unshiu_00260 | 283539 | 281552 | 1988  | 0.69  | 100   |
| scaffold00666 | 25673  | 42494  | 16822 | 15.87 | C_unshiu_00260 | 273061 | 256221 | 16841 | 5.87  | 99.79 |
| scaffold00666 | 43998  | 54508  | 10511 | 9.92  | C_unshiu_00486 | 135743 | 146255 | 10513 | 5.34  | 99.98 |
| scaffold00666 | 54054  | 95821  | 41768 | 39.4  | C_unshiu_00486 | 150983 | 192636 | 41654 | 21.15 | 99.59 |
| scaffold00666 | 96816  | 99200  | 2385  | 2.25  | C_unshiu_00486 | 194234 | 196602 | 2369  | 1.2   | 98.54 |
| scaffold00666 | 104796 | 106008 | 1213  | 1.14  | C_unshiu_00899 | 72006  | 70793  | 1214  | 1.04  | 99.84 |
| scaffold00668 | 7334   | 8383   | 1050  | 1     | C_unshiu_03151 | 3201   | 2149   | 1053  | 32.9  | 99.24 |
| scaffold00668 | 8384   | 11835  | 3452  | 3.27  | C_unshiu_01239 | 76848  | 80300  | 3453  | 4.22  | 99.28 |
| scaffold00668 | 27899  | 49821  | 21923 | 20.78 | C_unshiu_00988 | 107796 | 85874  | 21923 | 20.34 | 99.99 |
| scaffold00668 | 57133  | 61060  | 3928  | 3.72  | C_unshiu_01150 | 54316  | 50409  | 3908  | 4.3   | 99.03 |
| scaffold00668 | 64529  | 70117  | 5589  | 5.3   | C_unshiu_01150 | 42042  | 36454  | 5589  | 6.15  | 99.98 |
| scaffold00668 | 71778  | 81835  | 10058 | 9.53  | C_unshiu_01150 | 32657  | 22582  | 10076 | 11.09 | 99.59 |
| scaffold00668 | 81594  | 83517  | 1924  | 1.82  | C_unshiu_01461 | 34726  | 32802  | 1925  | 2.92  | 98.65 |
| scaffold00668 | 87815  | 105156 | 17342 | 16.44 | C_unshiu_01150 | 17316  | 1      | 17316 | 19.07 | 99.63 |
| scaffold00669 | 13556  | 20873  | 7318  | 6.94  | C_unshiu_00611 | 55889  | 48505  | 7385  | 4.48  | 98.11 |
| scaffold00669 | 25025  | 30493  | 5469  | 5.18  | C_unshiu_00611 | 48102  | 42632  | 5471  | 3.32  | 99.32 |
| scaffold00669 | 30605  | 36429  | 5825  | 5.52  | C_unshiu_00611 | 42631  | 36806  | 5826  | 3.54  | 99.04 |
| scaffold00669 | 36606  | 41518  | 4913  | 4.66  | C_unshiu_00611 | 36450  | 31538  | 4913  | 2.98  | 99.88 |
| scaffold00669 | 43675  | 46316  | 2642  | 2.5   | C_unshiu_00611 | 29490  | 26861  | 2630  | 1.6   | 98.87 |
| scaffold00669 | 46437  | 49179  | 2743  | 2.6   | C_unshiu_00611 | 26845  | 24103  | 2743  | 1.66  | 99.45 |
| scaffold00669 | 51120  | 52658  | 1539  | 1.46  | C_unshiu_00414 | 29350  | 30886  | 1537  | 0.7   | 99.55 |
| scaffold00669 | 51611  | 56797  | 5187  | 4.92  | C_unshiu_00611 | 21750  | 16562  | 5189  | 3.15  | 98.08 |
| scaffold00669 | 57023  | 59604  | 2582  | 2.45  | C_unshiu_00414 | 34869  | 37452  | 2584  | 1.17  | 99.77 |
| scaffold00669 | 59849  | 73289  | 13441 | 12.74 | C_unshiu_00611 | 13577  | 176    | 13402 | 8.13  | 98.75 |
| scaffold00669 | 67479  | 74073  | 6595  | 6.25  | C_unshiu_00414 | 45428  | 52023  | 6596  | 2.99  | 98.5  |
| scaffold00669 | 74099  | 76941  | 2843  | 2.7   | C_unshiu_00414 | 51922  | 54770  | 2849  | 1.29  | 98.77 |
| scaffold00669 | 78762  | 80711  | 1950  | 1.85  | C_unshiu_00414 | 56972  | 58920  | 1949  | 0.88  | 99.08 |
| scaffold00669 | 80732  | 83013  | 2282  | 2.16  | C_unshiu_00492 | 188689 | 186411 | 2279  | 1.17  | 98.69 |
| scaffold00669 | 82493  | 92115  | 9623  | 9.12  | C_unshiu_00414 | 60817  | 70439  | 9623  | 4.36  | 99.98 |
| scaffold00669 | 91807  | 95154  | 3348  | 3.17  | C_unshiu_00492 | 163440 | 160095 | 3346  | 1.72  | 99.46 |
| scaffold00669 | 95170  | 97469  | 2300  | 2.18  | C_unshiu_00414 | 74168  | 76467  | 2300  | 1.04  | 99.74 |
| scaffold00669 | 97581  | 105481 | 7901  | 7.49  | C_unshiu_00414 | 76843  | 84739  | 7897  | 3.58  | 99.53 |
| scaffold00670 | 72657  | 77683  | 5027  | 4.77  | C_unshiu_01347 | 30600  | 25577  | 5024  | 6.77  | 98.08 |
| scaffold00670 | 79661  | 83548  | 3888  | 3.69  | C_unshiu_01347 | 24721  | 20834  | 3888  | 5.24  | 99.64 |
| scaffold00670 | 81502  | 93112  | 11611 | 11.01 | C_unshiu_00716 | 1      | 11615  | 11615 | 8.2   | 99.72 |
| scaffold00671 | 1      | 1030   | 1030  | 0.98  | C_unshiu_00939 | 65822  | 66851  | 1030  | 0.92  | 100   |
| scaffold00671 | 6665   | 7795   | 1131  | 1.07  | C_unshiu_00521 | 177215 | 178346 | 1132  | 0.61  | 98.41 |
| scaffold00671 | 7662   | 34963  | 27302 | 25.93 | C_unshiu_01728 | 51553  | 24266  | 27288 | 52.93 | 99.52 |
| scaffold00671 | 35121  | 56917  | 21797 | 20.7  | C_unshiu_01728 | 23985  | 2214   | 21772 | 42.23 | 99.89 |
| scaffold00671 | 57497  | 60692  | 3196  | 3.04  | C_unshiu_00429 | 45972  | 42803  | 3170  | 1.47  | 98.94 |
| scaffold00671 | 64824  | 66312  | 1489  | 1.41  | C_unshiu_02831 | 1897   | 3396   | 1500  | 8.74  | 98.8  |
| scaffold00671 | 67731  | 68769  | 1039  | 0.99  | C_unshiu_02831 | 6085   | 7124   | 1040  | 6.06  | 98.66 |
| scaffold00671 | 69624  | 72603  | 2980  | 2.83  | C_unshiu_00429 | 35747  | 32760  | 2988  | 1.38  | 98.66 |
| scaffold00671 | 72601  | 80207  | 7607  | 7.22  | C_unshiu_00429 | 32147  | 24536  | 7612  | 3.53  | 99.78 |
| scaffold00671 | 83600  | 88296  | 4697  | 4.46  | C_unshiu_02831 | 12391  | 17101  | 4711  | 27.46 | 99.02 |
| scaffold00671 | 103019 | 105299 | 2281  | 2.17  | C_unshiu_01836 | 6409   | 8674   | 2266  | 4.81  | 98.33 |
| scaffold00672 | 4988   | 27491  | 22504 | 21.38 | C_unshiu_00421 | 22320  | 27     | 22294 | 10.2  | 98.71 |
| scaffold00672 | 43068  | 57793  | 14726 | 13.99 | C_unshiu_00313 | 71904  | 86584  | 14681 | 5.67  | 99.2  |
| scaffold00672 | 54742  | 59745  | 5004  | 4.75  | C_unshiu_02817 | 17254  | 12233  | 5022  | 28.69 | 98.23 |
| scaffold00672 | 59771  | 71243  | 11473 | 10.9  | C_unshiu_02817 | 11474  | 1      | 11474 | 65.55 | 99.88 |
| scaffold00672 | 79611  | 92190  | 12580 | 11.95 | C_unshiu_02163 | 34491  | 21912  | 12580 | 36.41 | 99.91 |
| scaffold00672 | 96282  | 98532  | 2251  | 2.14  | C_unshiu_02163 | 18698  | 16448  | 2251  | 6.52  | 100   |
| scaffold00672 | 102157 | 103784 | 1628  | 1.55  | C_unshiu_02163 | 16878  | 15254  | 1625  | 4.7   | 98.22 |
| scaffold00672 | 102675 | 105271 | 2597  | 2.47  | C_unshiu_02163 | 9778   | 7181   | 2598  | 7.52  | 99.31 |
| scaffold00673 | 1      | 1911   | 1911  | 1.82  | C_unshiu_01530 | 35344  | 37254  | 1911  | 3.1   | 100   |
| scaffold00673 | 23848  | 25312  | 1465  | 1.39  | C_unshiu_01100 | 87930  | 89395  | 1466  | 1.53  | 98.23 |
| scaffold00673 | 28853  | 38416  | 9564  | 9.09  | C_unshiu_01432 | 1      | 9564   | 9564  | 14.02 | 100   |
| scaffold00673 | 42962  | 58759  | 15798 | 15.02 | C_unshiu_01432 | 13644  | 29441  | 15798 | 23.15 | 99.99 |
| scaffold00673 | 65100  | 68842  | 3743  | 3.56  | C_unshiu_01432 | 35717  | 39442  | 3726  | 5.46  | 99.49 |
| scaffold00673 | 69073  | 72431  | 3359  | 3.19  | C_unshiu_01432 | 40555  | 43910  | 3356  | 4.92  | 99.91 |
| scaffold00673 | 92875  | 94563  | 1689  | 1.61  | C_unshiu_00470 | 198807 | 197131 | 1677  | 0.83  | 99.11 |
| scaffold00673 | 98887  | 100381 | 1495  | 1.42  | C_unshiu_02376 | 17948  | 19442  | 1495  | 5.38  | 99.2  |
| scaffold00674 | 1457   | 5267   | 3811  | 3.63  | C_unshiu_00943 | 57487  | 61297  | 3811  | 3.4   | 99.95 |
| scaffold00674 | 6463   | 8986   | 2524  | 2.41  | C_unshiu_00943 | 62780  | 65303  | 2524  | 2.25  | 100   |
| scaffold00674 | 15191  | 27680  | 12490 | 11.91 | C_unshiu_00943 | 70809  | 83301  | 12493 | 11.15 | 99.15 |
| scaffold00674 | 29985  | 31069  | 1085  | 1.03  | C_unshiu_00943 | 86295  | 87379  | 1085  | 0.97  | 100   |
| scaffold00674 | 31164  | 40594  | 9431  | 8.99  | C_unshiu_00943 | 87513  | 96943  | 9431  | 8.41  | 100   |
| scaffold00674 | 41769  | 45619  | 3851  | 3.67  | C_unshiu_02610 | 16693  | 12843  | 3851  | 17.64 | 99.4  |
| scaffold00674 | 44059  | 47832  | 3774  | 3.6   | C_unshiu_00943 | 96603  | 100376 | 3774  | 3.37  | 99.6  |

|               |        |        |       |       |                |        |        |       |       |       |
|---------------|--------|--------|-------|-------|----------------|--------|--------|-------|-------|-------|
| scaffold00674 | 48026  | 50582  | 2557  | 2.44  | C_unshiu_02610 | 20337  | 17780  | 2558  | 11.72 | 99.96 |
| scaffold00674 | 55901  | 60575  | 4675  | 4.46  | C_unshiu_02610 | 11409  | 6774   | 4636  | 21.24 | 98.46 |
| scaffold00674 | 60567  | 62215  | 1649  | 1.57  | C_unshiu_01509 | 20838  | 22486  | 1649  | 2.63  | 100   |
| scaffold00674 | 62705  | 69193  | 6489  | 6.19  | C_unshiu_02445 | 5339   | 11820  | 6482  | 24.67 | 99.04 |
| scaffold00674 | 75409  | 77912  | 2504  | 2.39  | C_unshiu_01174 | 20817  | 18314  | 2504  | 2.84  | 100   |
| scaffold00674 | 77906  | 79483  | 1578  | 1.5   | C_unshiu_01520 | 6271   | 7858   | 1588  | 2.55  | 98.3  |
| scaffold00674 | 79780  | 81150  | 1371  | 1.31  | C_unshiu_01520 | 4976   | 6346   | 1371  | 2.2   | 100   |
| scaffold00674 | 82241  | 87556  | 5316  | 5.07  | C_unshiu_01520 | 7783   | 13096  | 5314  | 8.54  | 99.85 |
| scaffold00674 | 87567  | 89542  | 1976  | 1.88  | C_unshiu_00231 | 210410 | 208435 | 1976  | 0.64  | 100   |
| scaffold00674 | 90597  | 104886 | 14290 | 13.62 | C_unshiu_02446 | 26276  | 11999  | 14278 | 54.34 | 99.56 |
| scaffold00675 | 47051  | 52676  | 5626  | 5.37  | C_unshiu_00147 | 258810 | 253187 | 5624  | 1.44  | 99.96 |
| scaffold00675 | 52782  | 58401  | 5620  | 5.36  | C_unshiu_00147 | 252669 | 247028 | 5642  | 1.45  | 98.14 |
| scaffold00675 | 59653  | 60877  | 1225  | 1.17  | C_unshiu_00147 | 245519 | 244293 | 1227  | 0.31  | 98.94 |
| scaffold00675 | 61211  | 62764  | 1554  | 1.48  | C_unshiu_00147 | 242573 | 241020 | 1554  | 0.4   | 100   |
| scaffold00675 | 63387  | 65855  | 2469  | 2.36  | C_unshiu_00147 | 239976 | 237515 | 2462  | 0.63  | 98.38 |
| scaffold00675 | 82919  | 97736  | 14818 | 14.14 | C_unshiu_00147 | 224617 | 209775 | 14843 | 3.81  | 98.35 |
| scaffold00676 | 18095  | 20068  | 1974  | 1.89  | C_unshiu_02485 | 25051  | 23102  | 1950  | 7.78  | 98.53 |
| scaffold00676 | 21053  | 28678  | 7626  | 7.31  | C_unshiu_02485 | 21520  | 13899  | 7622  | 30.43 | 99.57 |
| scaffold00676 | 29558  | 33655  | 4098  | 3.93  | C_unshiu_02485 | 11259  | 7164   | 4096  | 16.35 | 99.9  |
| scaffold00676 | 34976  | 39303  | 4328  | 4.15  | C_unshiu_02485 | 5406   | 1080   | 4327  | 17.27 | 99.93 |
| scaffold00676 | 43577  | 68503  | 24927 | 23.9  | C_unshiu_01453 | 1      | 24944  | 24944 | 37.65 | 99.72 |
| scaffold00676 | 70076  | 73495  | 3420  | 3.28  | C_unshiu_01453 | 27079  | 30498  | 3420  | 5.16  | 100   |
| scaffold00676 | 78647  | 80873  | 2227  | 2.13  | C_unshiu_01453 | 34923  | 37149  | 2227  | 3.36  | 100   |
| scaffold00676 | 80919  | 85994  | 5076  | 4.87  | C_unshiu_01453 | 38983  | 44063  | 5081  | 7.67  | 99.78 |
| scaffold00676 | 86342  | 90604  | 4263  | 4.09  | C_unshiu_01453 | 44700  | 48962  | 4263  | 6.43  | 100   |
| scaffold00676 | 90249  | 92910  | 2662  | 2.55  | C_unshiu_01453 | 48961  | 51620  | 2660  | 4.01  | 99.25 |
| scaffold00676 | 93606  | 98801  | 5196  | 4.98  | C_unshiu_01043 | 12327  | 17523  | 5197  | 5.13  | 98.6  |
| scaffold00677 | 1928   | 4077   | 2150  | 2.06  | C_unshiu_01800 | 2256   | 4407   | 2152  | 4.44  | 98.47 |
| scaffold00677 | 10515  | 12699  | 2185  | 2.1   | C_unshiu_01800 | 3923   | 6112   | 2190  | 4.52  | 98.55 |
| scaffold00677 | 13290  | 23386  | 10097 | 9.69  | C_unshiu_01800 | 7109   | 17196  | 10088 | 20.8  | 99.46 |
| scaffold00677 | 25604  | 27557  | 1954  | 1.88  | C_unshiu_01800 | 17518  | 19471  | 1954  | 4.03  | 100   |
| scaffold00677 | 27692  | 29337  | 1646  | 1.58  | C_unshiu_01800 | 19471  | 21106  | 1636  | 3.37  | 98.79 |
| scaffold00677 | 30947  | 35506  | 4560  | 4.38  | C_unshiu_00393 | 175621 | 180180 | 4560  | 2.03  | 100   |
| scaffold00677 | 30952  | 36100  | 5149  | 4.94  | C_unshiu_00634 | 98186  | 93038  | 5149  | 3.22  | 100   |
| scaffold00677 | 36313  | 37734  | 1422  | 1.36  | C_unshiu_01800 | 27725  | 29145  | 1421  | 2.93  | 99.93 |
| scaffold00677 | 38741  | 62122  | 23382 | 22.44 | C_unshiu_02202 | 25005  | 1626   | 23380 | 70.66 | 98.62 |
| scaffold00677 | 70883  | 73218  | 2336  | 2.24  | C_unshiu_02509 | 15223  | 17552  | 2330  | 9.54  | 98.97 |
| scaffold00677 | 74223  | 75839  | 1617  | 1.55  | C_unshiu_02843 | 9144   | 10760  | 1617  | 9.65  | 99.26 |
| scaffold00677 | 89233  | 90645  | 1413  | 1.36  | C_unshiu_00931 | 109443 | 108031 | 1413  | 1.24  | 100   |
| scaffold00677 | 94866  | 101265 | 6400  | 6.14  | C_unshiu_01800 | 21022  | 27413  | 6392  | 13.18 | 98.15 |
| scaffold00678 | 7964   | 10021  | 2058  | 1.98  | C_unshiu_02580 | 10797  | 8739   | 2059  | 9.13  | 99.76 |
| scaffold00678 | 12630  | 14070  | 1441  | 1.38  | C_unshiu_00324 | 73655  | 72215  | 1441  | 0.57  | 99.86 |
| scaffold00678 | 16434  | 18266  | 1833  | 1.76  | C_unshiu_02580 | 2960   | 1134   | 1827  | 8.1   | 99.51 |
| scaffold00678 | 19416  | 20484  | 1069  | 1.03  | C_unshiu_00324 | 26950  | 28018  | 1069  | 0.42  | 99.91 |
| scaffold00678 | 21416  | 25146  | 3731  | 3.58  | C_unshiu_00324 | 29284  | 33019  | 3736  | 1.47  | 99.41 |
| scaffold00678 | 30176  | 32035  | 1860  | 1.79  | C_unshiu_00324 | 33661  | 35523  | 1863  | 0.73  | 99.2  |
| scaffold00678 | 38439  | 40553  | 2115  | 2.03  | C_unshiu_00324 | 41649  | 43763  | 2115  | 0.83  | 99.01 |
| scaffold00678 | 47564  | 53519  | 5956  | 5.72  | C_unshiu_02157 | 16368  | 10410  | 5959  | 17.18 | 99.23 |
| scaffold00678 | 55547  | 65330  | 9784  | 9.4   | C_unshiu_02157 | 9774   | 1      | 9774  | 28.19 | 99.82 |
| scaffold00678 | 73658  | 75072  | 1415  | 1.36  | C_unshiu_01406 | 11272  | 12679  | 1408  | 2.01  | 98.52 |
| scaffold00678 | 81420  | 82759  | 1340  | 1.29  | C_unshiu_01406 | 54221  | 52884  | 1338  | 1.91  | 98.29 |
| scaffold00678 | 84270  | 85448  | 1179  | 1.13  | C_unshiu_01406 | 57542  | 56364  | 1179  | 1.68  | 98.05 |
| scaffold00678 | 101940 | 104100 | 2161  | 2.08  | C_unshiu_01500 | 46814  | 44628  | 2187  | 3.45  | 98.4  |
| scaffold00681 | 15653  | 33329  | 17677 | 17.08 | C_unshiu_02679 | 8      | 17668  | 17661 | 86.99 | 98.53 |
| scaffold00681 | 43533  | 58835  | 15303 | 14.78 | C_unshiu_01374 | 66561  | 51260  | 15302 | 21.16 | 99.76 |
| scaffold00681 | 73711  | 82667  | 8957  | 8.65  | C_unshiu_00029 | 646209 | 637255 | 8955  | 1.25  | 99.93 |
| scaffold00682 | 12864  | 16641  | 3778  | 3.65  | C_unshiu_00986 | 92622  | 88808  | 3815  | 3.53  | 98.38 |
| scaffold00682 | 16636  | 21118  | 4483  | 4.33  | C_unshiu_00986 | 83875  | 79357  | 4519  | 4.18  | 98.36 |
| scaffold00682 | 22990  | 34206  | 11217 | 10.84 | C_unshiu_00986 | 76759  | 65486  | 11274 | 10.43 | 98.93 |
| scaffold00682 | 34968  | 48118  | 13151 | 12.7  | C_unshiu_00986 | 65303  | 52171  | 13133 | 12.15 | 99.35 |
| scaffold00682 | 48114  | 65350  | 17237 | 16.65 | C_unshiu_00986 | 51610  | 34458  | 17153 | 15.87 | 98.88 |
| scaffold00682 | 78931  | 83194  | 4264  | 4.12  | C_unshiu_00986 | 24365  | 20082  | 4284  | 3.96  | 98.83 |
| scaffold00682 | 83456  | 86541  | 3086  | 2.98  | C_unshiu_00986 | 18589  | 15513  | 3077  | 2.85  | 98.8  |
| scaffold00682 | 97577  | 99530  | 1954  | 1.89  | C_unshiu_01524 | 50864  | 48911  | 1954  | 3.15  | 99.23 |
| scaffold00682 | 99530  | 101080 | 1551  | 1.5   | C_unshiu_01524 | 48319  | 46770  | 1550  | 2.5   | 99.74 |
| scaffold00683 | 1623   | 24418  | 22796 | 22.12 | C_unshiu_00266 | 26438  | 49226  | 22789 | 8.01  | 99.83 |
| scaffold00683 | 24954  | 32518  | 7565  | 7.34  | C_unshiu_00266 | 49868  | 57432  | 7565  | 2.66  | 99.93 |
| scaffold00683 | 33298  | 41363  | 8066  | 7.83  | C_unshiu_00266 | 58619  | 66679  | 8061  | 2.83  | 99.23 |
| scaffold00683 | 45348  | 49010  | 3663  | 3.55  | C_unshiu_01670 | 31894  | 35556  | 3663  | 6.77  | 100   |
| scaffold00683 | 50694  | 52003  | 1310  | 1.27  | C_unshiu_01126 | 92499  | 91189  | 1311  | 1.4   | 99.69 |
| scaffold00683 | 53633  | 65991  | 12359 | 11.99 | C_unshiu_01126 | 89527  | 77172  | 12356 | 13.24 | 98.75 |
| scaffold00683 | 67156  | 74543  | 7388  | 7.17  | C_unshiu_01126 | 77176  | 69772  | 7405  | 7.93  | 99.03 |
| scaffold00683 | 77173  | 78435  | 1263  | 1.23  | C_unshiu_02299 | 25584  | 26846  | 1263  | 4.23  | 100   |
| scaffold00683 | 78540  | 80073  | 1534  | 1.49  | C_unshiu_02299 | 24014  | 25548  | 1535  | 5.14  | 98.31 |
| scaffold00683 | 80435  | 100285 | 19851 | 19.26 | C_unshiu_01126 | 67142  | 47288  | 19855 | 21.27 | 99.58 |
| scaffold00684 | 7814   | 9796   | 1983  | 1.92  | C_unshiu_00375 | 151075 | 153043 | 1969  | 0.85  | 98.49 |
| scaffold00684 | 13885  | 17661  | 3777  | 3.67  | C_unshiu_00375 | 157650 | 161441 | 3792  | 1.64  | 98.68 |
| scaffold00684 | 17782  | 19207  | 1426  | 1.38  | C_unshiu_00375 | 161641 | 163068 | 1428  | 0.62  | 99.37 |
| scaffold00684 | 19464  | 25428  | 5965  | 5.79  | C_unshiu_00375 | 164687 | 170650 | 5964  | 2.58  | 99.21 |

|               |       |        |       |       |                |        |        |       |       |       |
|---------------|-------|--------|-------|-------|----------------|--------|--------|-------|-------|-------|
| scaffold00684 | 25593 | 27911  | 2319  | 2.25  | C_unshiu_02612 | 12122  | 14440  | 2319  | 10.64 | 99.83 |
| scaffold00684 | 26168 | 27911  | 1744  | 1.69  | C_unshiu_00375 | 171246 | 173003 | 1758  | 0.76  | 98.07 |
| scaffold00684 | 28665 | 29742  | 1078  | 1.05  | C_unshiu_00375 | 174025 | 175103 | 1079  | 0.47  | 99.07 |
| scaffold00684 | 30971 | 33866  | 2896  | 2.81  | C_unshiu_02612 | 18896  | 21798  | 2903  | 13.32 | 99.07 |
| scaffold00684 | 42867 | 44259  | 1393  | 1.35  | C_unshiu_00375 | 184910 | 186303 | 1394  | 0.6   | 98.07 |
| scaffold00684 | 44281 | 46406  | 2126  | 2.06  | C_unshiu_00375 | 186206 | 188331 | 2126  | 0.92  | 99.95 |
| scaffold00684 | 47525 | 56766  | 9242  | 8.97  | C_unshiu_00375 | 189719 | 198985 | 9267  | 4     | 99.27 |
| scaffold00684 | 56766 | 62809  | 6044  | 5.87  | C_unshiu_00375 | 199270 | 205327 | 6058  | 2.62  | 99.19 |
| scaffold00684 | 64299 | 65703  | 1405  | 1.36  | C_unshiu_00375 | 205888 | 207294 | 1407  | 0.61  | 99.36 |
| scaffold00684 | 65726 | 72576  | 6851  | 6.65  | C_unshiu_00375 | 207662 | 214525 | 6864  | 2.96  | 99.2  |
| scaffold00684 | 79034 | 82235  | 3202  | 3.11  | C_unshiu_01552 | 1862   | 5063   | 3202  | 5.3   | 99.22 |
| scaffold00684 | 86151 | 91232  | 5082  | 4.93  | C_unshiu_01552 | 5883   | 10957  | 5075  | 8.39  | 99.69 |
| scaffold00684 | 95253 | 96279  | 1027  | 1     | C_unshiu_01552 | 14498  | 15524  | 1027  | 1.7   | 100   |
| scaffold00685 | 1     | 1152   | 1152  | 1.12  | C_unshiu_01140 | 63256  | 62105  | 1152  | 1.25  | 100   |
| scaffold00685 | 1226  | 4084   | 2859  | 2.77  | C_unshiu_01140 | 62000  | 59142  | 2859  | 3.11  | 99.97 |
| scaffold00685 | 6933  | 12429  | 5497  | 5.34  | C_unshiu_01140 | 57548  | 52055  | 5494  | 5.97  | 99.87 |
| scaffold00685 | 12455 | 13735  | 1281  | 1.24  | C_unshiu_01140 | 52200  | 50920  | 1281  | 1.39  | 99.69 |
| scaffold00685 | 14789 | 16051  | 1263  | 1.23  | C_unshiu_01140 | 49631  | 48369  | 1263  | 1.37  | 100   |
| scaffold00685 | 16750 | 21652  | 4903  | 4.76  | C_unshiu_01140 | 47351  | 42481  | 4871  | 5.29  | 98.9  |
| scaffold00685 | 21659 | 32902  | 11244 | 10.91 | C_unshiu_01140 | 42248  | 31005  | 11244 | 12.22 | 99.44 |
| scaffold00685 | 45909 | 46957  | 1049  | 1.02  | C_unshiu_00891 | 115623 | 114575 | 1049  | 0.89  | 99.9  |
| scaffold00685 | 49277 | 50703  | 1427  | 1.39  | C_unshiu_00891 | 111465 | 110038 | 1428  | 1.21  | 99.79 |
| scaffold00685 | 51570 | 53846  | 2277  | 2.21  | C_unshiu_00891 | 108759 | 106483 | 2277  | 1.93  | 100   |
| scaffold00685 | 54839 | 61770  | 6932  | 6.73  | C_unshiu_00442 | 39229  | 46160  | 6932  | 3.29  | 100   |
| scaffold00685 | 63651 | 67768  | 4118  | 4     | C_unshiu_02002 | 23074  | 27193  | 4120  | 10.16 | 99.68 |
| scaffold00685 | 67769 | 71708  | 3940  | 3.82  | C_unshiu_00124 | 107286 | 111225 | 3940  | 0.94  | 100   |
| scaffold00685 | 79383 | 80641  | 1259  | 1.22  | C_unshiu_02002 | 39283  | 40541  | 1259  | 3.11  | 100   |
| scaffold00686 | 4703  | 11660  | 6958  | 6.75  | C_unshiu_00065 | 462583 | 455629 | 6955  | 1.26  | 99.14 |
| scaffold00686 | 11885 | 31473  | 19589 | 19.02 | C_unshiu_00065 | 454227 | 434772 | 19456 | 3.52  | 98.92 |
| scaffold00686 | 31407 | 44843  | 13437 | 13.04 | C_unshiu_00065 | 434799 | 421363 | 13437 | 2.43  | 100   |
| scaffold00686 | 44937 | 67111  | 22175 | 21.53 | C_unshiu_00065 | 420975 | 398781 | 22195 | 4.02  | 99.82 |
| scaffold00686 | 68491 | 71798  | 3308  | 3.21  | C_unshiu_00065 | 396843 | 393551 | 3293  | 0.6   | 99.21 |
| scaffold00686 | 72199 | 75545  | 3347  | 3.25  | C_unshiu_00065 | 392722 | 389385 | 3338  | 0.6   | 99.52 |
| scaffold00686 | 87466 | 89017  | 1552  | 1.51  | C_unshiu_00160 | 367051 | 365502 | 1550  | 0.42  | 98.2  |
| scaffold00687 | 193   | 18237  | 18045 | 17.56 | C_unshiu_01227 | 44631  | 62697  | 18067 | 21.85 | 99.41 |
| scaffold00687 | 22575 | 28494  | 5920  | 5.76  | C_unshiu_01227 | 65592  | 71477  | 5886  | 7.12  | 98.43 |
| scaffold00687 | 31949 | 77433  | 45485 | 44.26 | C_unshiu_00174 | 165210 | 119886 | 45325 | 12.45 | 98.39 |
| scaffold00687 | 85336 | 86678  | 1343  | 1.31  | C_unshiu_00174 | 107873 | 106531 | 1343  | 0.37  | 99.78 |
| scaffold00687 | 86697 | 88032  | 1336  | 1.3   | C_unshiu_00042 | 21759  | 23094  | 1336  | 0.21  | 99.85 |
| scaffold00687 | 95736 | 97792  | 2057  | 2     | C_unshiu_00042 | 25404  | 27463  | 2060  | 0.32  | 98.84 |
| scaffold00687 | 98171 | 101368 | 3198  | 3.11  | C_unshiu_00789 | 83495  | 80298  | 3198  | 2.46  | 100   |
| scaffold00688 | 1     | 2797   | 2797  | 2.73  | C_unshiu_00382 | 228171 | 225387 | 2785  | 1.22  | 99.36 |
| scaffold00688 | 4307  | 6066   | 1760  | 1.72  | C_unshiu_00382 | 223182 | 221423 | 1760  | 0.77  | 100   |
| scaffold00688 | 6155  | 9963   | 3809  | 3.72  | C_unshiu_00382 | 221087 | 217234 | 3854  | 1.69  | 98.21 |
| scaffold00688 | 13567 | 18914  | 5348  | 5.22  | C_unshiu_00382 | 212169 | 206814 | 5356  | 2.34  | 99.22 |
| scaffold00688 | 20377 | 22827  | 2451  | 2.39  | C_unshiu_00382 | 204970 | 202517 | 2454  | 1.07  | 98.62 |
| scaffold00688 | 39939 | 55615  | 15677 | 15.3  | C_unshiu_02298 | 21452  | 5779   | 15674 | 52.45 | 99.41 |
| scaffold00688 | 56308 | 57950  | 1643  | 1.6   | C_unshiu_01635 | 1700   | 69     | 1632  | 2.93  | 98.72 |
| scaffold00688 | 73819 | 75243  | 1425  | 1.39  | C_unshiu_02298 | 5856   | 4430   | 1427  | 4.77  | 99.65 |
| scaffold00688 | 81777 | 84516  | 2740  | 2.67  | C_unshiu_01110 | 41868  | 39129  | 2740  | 2.89  | 99.89 |
| scaffold00688 | 85948 | 95537  | 9590  | 9.36  | C_unshiu_01110 | 37622  | 28032  | 9591  | 10.1  | 99.76 |
| scaffold00689 | 1     | 9453   | 9453  | 9.24  | C_unshiu_00083 | 66862  | 76243  | 9382  | 1.98  | 98.93 |
| scaffold00689 | 9892  | 37445  | 27554 | 26.94 | C_unshiu_00083 | 76819  | 104372 | 27554 | 5.83  | 99.96 |
| scaffold00689 | 39669 | 46792  | 7124  | 6.96  | C_unshiu_00083 | 105252 | 112390 | 7139  | 1.51  | 99.26 |
| scaffold00689 | 47756 | 73263  | 25508 | 24.94 | C_unshiu_01730 | 62     | 25575  | 25514 | 49.53 | 99.38 |
| scaffold00689 | 72017 | 81983  | 9967  | 9.74  | C_unshiu_01652 | 1      | 9975   | 9975  | 18.11 | 99.52 |
| scaffold00689 | 84417 | 101469 | 17053 | 16.67 | C_unshiu_01652 | 14753  | 31830  | 17078 | 31.01 | 99.43 |
| scaffold00692 | 3365  | 10781  | 7417  | 7.31  | C_unshiu_01846 | 13441  | 6022   | 7420  | 15.9  | 99.6  |
| scaffold00692 | 10799 | 11993  | 1195  | 1.18  | C_unshiu_01846 | 5805   | 4611   | 1195  | 2.56  | 99.83 |
| scaffold00692 | 16283 | 20365  | 4083  | 4.03  | C_unshiu_00132 | 2031   | 6111   | 4081  | 0.99  | 99.39 |
| scaffold00692 | 22313 | 35956  | 13644 | 13.45 | C_unshiu_02533 | 4295   | 17877  | 13583 | 57.04 | 98.35 |
| scaffold00692 | 46349 | 47962  | 1614  | 1.59  | C_unshiu_00818 | 94237  | 95849  | 1613  | 1.27  | 99.44 |
| scaffold00692 | 55728 | 59651  | 3924  | 3.87  | C_unshiu_00818 | 102435 | 106355 | 3921  | 3.1   | 99.75 |
| scaffold00692 | 59633 | 64993  | 5361  | 5.29  | C_unshiu_02290 | 15024  | 9664   | 5361  | 17.8  | 99.81 |
| scaffold00692 | 69228 | 70292  | 1065  | 1.05  | C_unshiu_02290 | 9954   | 8889   | 1066  | 3.54  | 98.87 |
| scaffold00692 | 81104 | 89086  | 7983  | 7.87  | C_unshiu_01846 | 39566  | 31547  | 8020  | 17.19 | 98.15 |
| scaffold00693 | 2075  | 10248  | 8174  | 8.07  | C_unshiu_00181 | 260870 | 252729 | 8142  | 2.28  | 98.66 |
| scaffold00693 | 20754 | 22485  | 1732  | 1.71  | C_unshiu_00181 | 212609 | 214340 | 1732  | 0.49  | 99.88 |
| scaffold00693 | 22804 | 23836  | 1033  | 1.02  | C_unshiu_00448 | 39468  | 38436  | 1033  | 0.5   | 100   |
| scaffold00693 | 23833 | 49513  | 25681 | 25.34 | C_unshiu_00181 | 216117 | 241780 | 25664 | 7.19  | 99.51 |
| scaffold00693 | 57671 | 58860  | 1190  | 1.17  | C_unshiu_00181 | 205562 | 204373 | 1190  | 0.33  | 100   |
| scaffold00693 | 58884 | 64808  | 5925  | 5.85  | C_unshiu_00181 | 203730 | 197814 | 5917  | 1.66  | 99.38 |
| scaffold00693 | 66154 | 74807  | 8654  | 8.54  | C_unshiu_00181 | 197036 | 188403 | 8634  | 2.42  | 99.77 |
| scaffold00693 | 74798 | 76203  | 1406  | 1.39  | C_unshiu_00931 | 18603  | 20008  | 1406  | 1.24  | 100   |
| scaffold00693 | 77041 | 83037  | 5997  | 5.92  | C_unshiu_00181 | 185675 | 179710 | 5966  | 1.67  | 98.12 |
| scaffold00693 | 84113 | 86681  | 2569  | 2.53  | C_unshiu_00181 | 178668 | 176100 | 2569  | 0.72  | 99.88 |
| scaffold00693 | 91441 | 98102  | 6662  | 6.57  | C_unshiu_00181 | 172032 | 165362 | 6671  | 1.87  | 99.22 |
| scaffold00694 | 16665 | 23939  | 7275  | 7.18  | C_unshiu_02650 | 7657   | 14931  | 7275  | 34.84 | 100   |
| scaffold00694 | 38543 | 45805  | 7263  | 7.17  | C_unshiu_02247 | 31854  | 24592  | 7263  | 22.8  | 100   |

|               |       |        |       |       |                |         |         |       |       |       |
|---------------|-------|--------|-------|-------|----------------|---------|---------|-------|-------|-------|
| scaffold00694 | 46623 | 47858  | 1236  | 1.22  | C_unshiu_02247 | 23366   | 22131   | 1236  | 3.88  | 100   |
| scaffold00694 | 48627 | 61741  | 13115 | 12.95 | C_unshiu_02247 | 21025   | 7912    | 13114 | 41.17 | 99.47 |
| scaffold00694 | 61740 | 64979  | 3240  | 3.2   | C_unshiu_01670 | 21767   | 24999   | 3233  | 5.97  | 98.61 |
| scaffold00694 | 67912 | 75498  | 7587  | 7.49  | C_unshiu_00391 | 221037  | 213469  | 7569  | 3.36  | 99.09 |
| scaffold00694 | 76333 | 78501  | 2169  | 2.14  | C_unshiu_00391 | 212386  | 210218  | 2169  | 0.96  | 99.12 |
| scaffold00694 | 82357 | 87622  | 5266  | 5.2   | C_unshiu_00391 | 206710  | 201445  | 5266  | 2.34  | 99.98 |
| scaffold00694 | 87836 | 90179  | 2344  | 2.31  | C_unshiu_01670 | 42804   | 45147   | 2344  | 4.33  | 100   |
| scaffold00694 | 90238 | 94971  | 4734  | 4.67  | C_unshiu_01670 | 45450   | 50137   | 4688  | 8.66  | 98.67 |
| scaffold00694 | 95409 | 97182  | 1774  | 1.75  | C_unshiu_01670 | 50268   | 52041   | 1774  | 3.28  | 99.44 |
| scaffold00695 | 1     | 1754   | 1754  | 1.74  | C_unshiu_01537 | 48147   | 46393   | 1755  | 2.87  | 98.06 |
| scaffold00695 | 2918  | 4666   | 1749  | 1.73  | C_unshiu_01537 | 44661   | 42914   | 1748  | 2.86  | 99.94 |
| scaffold00695 | 6012  | 8028   | 2017  | 2     | C_unshiu_01537 | 41107   | 39082   | 2026  | 3.31  | 98.92 |
| scaffold00695 | 11339 | 13338  | 2000  | 1.98  | C_unshiu_00456 | 172175  | 170175  | 2001  | 0.97  | 98.4  |
| scaffold00695 | 13143 | 15272  | 2130  | 2.11  | C_unshiu_01537 | 31439   | 29310   | 2130  | 3.48  | 99.95 |
| scaffold00695 | 15537 | 17002  | 1466  | 1.45  | C_unshiu_01537 | 29158   | 27690   | 1469  | 2.4   | 98.37 |
| scaffold00695 | 26647 | 28779  | 2133  | 2.11  | C_unshiu_00106 | 336394  | 334262  | 2133  | 0.47  | 100   |
| scaffold00695 | 32966 | 44668  | 11703 | 11.58 | C_unshiu_01510 | 23998   | 12292   | 11707 | 18.69 | 99.89 |
| scaffold00695 | 57754 | 60500  | 2747  | 2.72  | C_unshiu_01328 | 23884   | 21138   | 2747  | 3.65  | 100   |
| scaffold00695 | 69631 | 71102  | 1472  | 1.46  | C_unshiu_01133 | 75467   | 73995   | 1473  | 1.59  | 99.93 |
| scaffold00695 | 72321 | 77674  | 5354  | 5.3   | C_unshiu_01133 | 72355   | 66990   | 5366  | 5.8   | 99.65 |
| scaffold00695 | 77670 | 81439  | 3770  | 3.73  | C_unshiu_01346 | 50667   | 54436   | 3770  | 5.07  | 100   |
| scaffold00695 | 81440 | 88527  | 7088  | 7.01  | C_unshiu_01133 | 63952   | 56940   | 7013  | 7.58  | 98.42 |
| scaffold00695 | 88528 | 101088 | 12561 | 12.43 | C_unshiu_01133 | 57355   | 44804   | 12552 | 13.57 | 98.81 |
| scaffold00696 | 3192  | 7237   | 4046  | 4.02  | C_unshiu_01379 | 71624   | 67635   | 3990  | 5.57  | 98.32 |
| scaffold00696 | 16659 | 17728  | 1070  | 1.06  | C_unshiu_01379 | 57632   | 56563   | 1070  | 1.49  | 99.81 |
| scaffold00696 | 18070 | 27635  | 9566  | 9.5   | C_unshiu_01379 | 55871   | 46306   | 9566  | 13.36 | 98.25 |
| scaffold00696 | 40909 | 43837  | 2929  | 2.91  | C_unshiu_01379 | 42906   | 39965   | 2942  | 4.11  | 98.03 |
| scaffold00696 | 49490 | 53121  | 3632  | 3.61  | C_unshiu_00175 | 307031  | 303407  | 3625  | 1     | 98.27 |
| scaffold00696 | 50261 | 55677  | 5417  | 5.38  | C_unshiu_01379 | 36635   | 31230   | 5406  | 7.55  | 98.73 |
| scaffold00696 | 68043 | 76235  | 8193  | 8.14  | C_unshiu_01379 | 17175   | 8980    | 8196  | 11.44 | 99.11 |
| scaffold00696 | 78183 | 84087  | 5905  | 5.86  | C_unshiu_00609 | 4206    | 10110   | 5905  | 3.58  | 99.95 |
| scaffold00696 | 84893 | 86281  | 1389  | 1.38  | C_unshiu_00609 | 12064   | 13453   | 1390  | 0.84  | 99.35 |
| scaffold00696 | 92527 | 93726  | 1200  | 1.19  | C_unshiu_00859 | 15113   | 16311   | 1199  | 0.98  | 99.5  |
| scaffold00697 | 1     | 4701   | 4701  | 4.69  | C_unshiu_00445 | 14857   | 19557   | 4701  | 2.25  | 100   |
| scaffold00697 | 5312  | 11052  | 5741  | 5.73  | C_unshiu_00445 | 20334   | 26102   | 5769  | 2.76  | 99.05 |
| scaffold00697 | 11046 | 21950  | 10905 | 10.88 | C_unshiu_00445 | 26334   | 37304   | 10971 | 5.25  | 99.07 |
| scaffold00697 | 22627 | 24281  | 1655  | 1.65  | C_unshiu_01854 | 1687    | 15      | 1673  | 3.61  | 98.09 |
| scaffold00697 | 36184 | 48443  | 12260 | 12.24 | C_unshiu_02100 | 7663    | 19928   | 12266 | 33.62 | 99.58 |
| scaffold00697 | 57592 | 59122  | 1531  | 1.53  | C_unshiu_01876 | 37334   | 38860   | 1527  | 3.36  | 98.3  |
| scaffold00697 | 63553 | 68253  | 4701  | 4.69  | C_unshiu_01166 | 46287   | 41596   | 4692  | 5.26  | 99.64 |
| scaffold00697 | 77902 | 80497  | 2596  | 2.59  | C_unshiu_01835 | 20584   | 18011   | 2574  | 5.46  | 98.38 |
| scaffold00697 | 81421 | 82695  | 1275  | 1.27  | C_unshiu_00445 | 10      | 1272    | 1263  | 0.6   | 98.9  |
| scaffold00697 | 84630 | 87329  | 2700  | 2.69  | C_unshiu_00445 | 3636    | 6335    | 2700  | 1.29  | 99.41 |
| scaffold00698 | 13805 | 24268  | 10464 | 10.45 | C_unshiu_02822 | 17129   | 6676    | 10454 | 60.06 | 99.9  |
| scaffold00698 | 24288 | 28488  | 4201  | 4.19  | C_unshiu_02822 | 4176    | 1       | 4176  | 23.99 | 98.77 |
| scaffold00698 | 91696 | 99171  | 7476  | 7.46  | C_unshiu_00747 | 1       | 7476    | 7476  | 5.47  | 100   |
| scaffold00699 | 6573  | 9007   | 2435  | 2.44  | C_unshiu_01059 | 95109   | 92674   | 2436  | 2.46  | 99.92 |
| scaffold00699 | 12612 | 17981  | 5370  | 5.38  | C_unshiu_01059 | 90187   | 84818   | 5370  | 5.41  | 100   |
| scaffold00699 | 17975 | 23733  | 5759  | 5.77  | C_unshiu_01059 | 85043   | 79287   | 5757  | 5.8   | 99.9  |
| scaffold00699 | 27469 | 35911  | 8443  | 8.46  | C_unshiu_01059 | 76526   | 68108   | 8419  | 8.49  | 99.41 |
| scaffold00699 | 40112 | 63751  | 23640 | 23.68 | C_unshiu_01059 | 64895   | 41255   | 23641 | 23.83 | 99.99 |
| scaffold00699 | 63796 | 96009  | 32214 | 32.26 | C_unshiu_01059 | 41321   | 9149    | 32173 | 32.43 | 99.12 |
| scaffold00699 | 96815 | 99848  | 3034  | 3.04  | C_unshiu_01059 | 7855    | 4822    | 3034  | 3.06  | 100   |
| scaffold00700 | 7     | 36150  | 36144 | 36.27 | C_unshiu_00781 | 129678  | 93548   | 36131 | 27.59 | 99.92 |
| scaffold00700 | 38094 | 56783  | 18690 | 18.76 | C_unshiu_00781 | 91479   | 72934   | 18546 | 14.16 | 98.54 |
| scaffold00700 | 60039 | 81375  | 21337 | 21.41 | C_unshiu_00781 | 73108   | 51881   | 21228 | 16.21 | 98.86 |
| scaffold00700 | 90824 | 97822  | 6999  | 7.02  | C_unshiu_02135 | 9850    | 2866    | 6985  | 19.68 | 99.76 |
| scaffold00702 | 200   | 17538  | 17339 | 17.41 | C_unshiu_00972 | 35525   | 18101   | 17425 | 15.94 | 98.77 |
| scaffold00702 | 26264 | 42223  | 15960 | 16.02 | C_unshiu_00008 | 1041861 | 1057790 | 15930 | 1.48  | 99.49 |
| scaffold00702 | 45152 | 49818  | 4667  | 4.69  | C_unshiu_00972 | 10125   | 5460    | 4666  | 4.27  | 99.29 |
| scaffold00702 | 56125 | 59559  | 3435  | 3.45  | C_unshiu_00008 | 1074050 | 1077459 | 3410  | 0.32  | 98.89 |
| scaffold00702 | 60556 | 65128  | 4573  | 4.59  | C_unshiu_01251 | 76284   | 80856   | 4573  | 5.66  | 100   |
| scaffold00702 | 65348 | 96244  | 30897 | 31.02 | C_unshiu_01251 | 71634   | 40748   | 30887 | 38.2  | 99.95 |
| scaffold00702 | 98469 | 99604  | 1136  | 1.14  | C_unshiu_01251 | 38153   | 37017   | 1137  | 1.41  | 98.33 |
| scaffold00703 | 23878 | 49930  | 26053 | 26.17 | C_unshiu_01026 | 21382   | 47510   | 26129 | 25.31 | 98.34 |
| scaffold00703 | 76501 | 78627  | 2127  | 2.14  | C_unshiu_00581 | 30      | 2157    | 2128  | 1.24  | 98.4  |
| scaffold00704 | 1     | 7063   | 7063  | 7.11  | C_unshiu_00555 | 122776  | 129838  | 7063  | 3.99  | 99.96 |
| scaffold00704 | 15973 | 21515  | 5543  | 5.58  | C_unshiu_01686 | 6133    | 11676   | 5544  | 10.41 | 98.02 |
| scaffold00704 | 24263 | 33738  | 9476  | 9.54  | C_unshiu_01686 | 14315   | 23790   | 9476  | 17.8  | 99.81 |
| scaffold00704 | 34926 | 41366  | 6441  | 6.48  | C_unshiu_01686 | 26246   | 32686   | 6441  | 12.1  | 99.78 |
| scaffold00704 | 41877 | 43188  | 1312  | 1.32  | C_unshiu_01274 | 32531   | 33842   | 1312  | 1.66  | 99.85 |
| scaffold00704 | 44405 | 49009  | 4605  | 4.63  | C_unshiu_01686 | 34681   | 39243   | 4563  | 8.57  | 98.68 |
| scaffold00704 | 50869 | 66192  | 15324 | 15.42 | C_unshiu_01274 | 40001   | 55315   | 15315 | 19.35 | 99.84 |
| scaffold00704 | 66432 | 67977  | 1546  | 1.56  | C_unshiu_01274 | 55994   | 57539   | 1546  | 1.95  | 99.42 |
| scaffold00704 | 69101 | 71016  | 1916  | 1.93  | C_unshiu_01274 | 58927   | 60842   | 1916  | 2.42  | 99.48 |
| scaffold00704 | 74111 | 75418  | 1308  | 1.32  | C_unshiu_01274 | 61032   | 62339   | 1308  | 1.65  | 98.62 |
| scaffold00704 | 76313 | 77703  | 1391  | 1.4   | C_unshiu_01710 | 37586   | 38981   | 1396  | 2.68  | 99    |
| scaffold00705 | 25802 | 79721  | 53920 | 54.37 | C_unshiu_00106 | 614     | 54478   | 53865 | 11.96 | 99.21 |
| scaffold00706 | 817   | 1923   | 1107  | 1.12  | C_unshiu_00297 | 223460  | 224565  | 1106  | 0.41  | 99.91 |

|               |       |       |       |       |                |        |        |       |       |       |
|---------------|-------|-------|-------|-------|----------------|--------|--------|-------|-------|-------|
| scaffold00706 | 3508  | 6050  | 2543  | 2.57  | C_unshiu_00297 | 226096 | 228639 | 2544  | 0.95  | 99.84 |
| scaffold00706 | 6035  | 34115 | 28081 | 28.4  | C_unshiu_00466 | 81853  | 53778  | 28076 | 13.83 | 99.22 |
| scaffold00706 | 36115 | 40144 | 4030  | 4.08  | C_unshiu_00466 | 51651  | 47622  | 4030  | 1.99  | 99.73 |
| scaffold00706 | 42943 | 52566 | 9624  | 9.73  | C_unshiu_01750 | 37764  | 47386  | 9623  | 19.03 | 98.28 |
| scaffold00706 | 51701 | 56506 | 4806  | 4.86  | C_unshiu_00466 | 40326  | 35519  | 4808  | 2.37  | 98.57 |
| scaffold00706 | 58710 | 61003 | 2294  | 2.32  | C_unshiu_00982 | 81131  | 78838  | 2294  | 2.11  | 99.87 |
| scaffold00706 | 61022 | 62598 | 1577  | 1.59  | C_unshiu_02667 | 18686  | 17110  | 1577  | 7.66  | 99.05 |
| scaffold00706 | 68912 | 77353 | 8442  | 8.54  | C_unshiu_02667 | 11345  | 2903   | 8443  | 41.04 | 99.98 |
| scaffold00706 | 81048 | 82339 | 1292  | 1.31  | C_unshiu_02667 | 1600   | 309    | 1292  | 6.28  | 99.92 |
| scaffold00706 | 83177 | 84612 | 1436  | 1.45  | C_unshiu_00278 | 270937 | 269498 | 1440  | 0.52  | 98.89 |
| scaffold00706 | 85523 | 87103 | 1581  | 1.6   | C_unshiu_00046 | 170364 | 168780 | 1585  | 0.25  | 99.12 |
| scaffold00706 | 94642 | 95721 | 1080  | 1.09  | C_unshiu_00466 | 31402  | 30323  | 1080  | 0.53  | 98.89 |
| scaffold00707 | 5944  | 31098 | 25155 | 25.55 | C_unshiu_00529 | 111386 | 86274  | 25113 | 13.64 | 98.88 |
| scaffold00707 | 32109 | 37953 | 5845  | 5.94  | C_unshiu_00700 | 65654  | 71498  | 5845  | 4.07  | 99.9  |
| scaffold00707 | 41932 | 48948 | 7017  | 7.13  | C_unshiu_00700 | 99519  | 106555 | 7037  | 4.9   | 98.68 |
| scaffold00707 | 53136 | 59195 | 6060  | 6.16  | C_unshiu_00700 | 110025 | 116084 | 6060  | 4.22  | 99.95 |
| scaffold00707 | 55526 | 59195 | 3670  | 3.73  | C_unshiu_01238 | 77586  | 73914  | 3673  | 4.49  | 99.16 |
| scaffold00707 | 59216 | 66148 | 6933  | 7.04  | C_unshiu_01238 | 73400  | 66549  | 6852  | 8.38  | 98.24 |
| scaffold00707 | 70405 | 71911 | 1507  | 1.53  | C_unshiu_00700 | 2123   | 3629   | 1507  | 1.05  | 98.94 |
| scaffold00707 | 72620 | 78030 | 5411  | 5.5   | C_unshiu_00700 | 6533   | 11944  | 5412  | 3.77  | 99.98 |
| scaffold00707 | 80465 | 89631 | 9167  | 9.31  | C_unshiu_00700 | 15613  | 24773  | 9161  | 6.37  | 99.74 |
| scaffold00707 | 97383 | 98439 | 1057  | 1.07  | C_unshiu_00700 | 138412 | 137355 | 1058  | 0.74  | 99.81 |
| scaffold00708 | 1     | 2038  | 2038  | 2.08  | C_unshiu_01652 | 50013  | 47968  | 2046  | 3.72  | 99.02 |
| scaffold00708 | 5139  | 10607 | 5469  | 5.57  | C_unshiu_02519 | 16001  | 21477  | 5477  | 22.73 | 99.43 |
| scaffold00708 | 20375 | 26865 | 6491  | 6.61  | C_unshiu_00371 | 183759 | 190248 | 6490  | 2.79  | 99.95 |
| scaffold00708 | 26860 | 30607 | 3748  | 3.82  | C_unshiu_00057 | 485098 | 488845 | 3748  | 0.63  | 100   |
| scaffold00708 | 30608 | 32201 | 1594  | 1.62  | C_unshiu_00371 | 193722 | 195316 | 1595  | 0.69  | 99.69 |
| scaffold00708 | 35877 | 37225 | 1349  | 1.37  | C_unshiu_00371 | 197664 | 199012 | 1349  | 0.58  | 100   |
| scaffold00708 | 37785 | 45986 | 8202  | 8.36  | C_unshiu_00371 | 199951 | 208152 | 8202  | 3.53  | 100   |
| scaffold00708 | 50484 | 52157 | 1674  | 1.71  | C_unshiu_00371 | 215014 | 216687 | 1674  | 0.72  | 100   |
| scaffold00708 | 52157 | 62534 | 10378 | 10.57 | C_unshiu_00371 | 216803 | 227158 | 10356 | 4.45  | 99.13 |
| scaffold00708 | 59691 | 67140 | 7450  | 7.59  | C_unshiu_01340 | 32264  | 24816  | 7449  | 9.99  | 99.58 |
| scaffold00708 | 70853 | 87191 | 16339 | 16.64 | C_unshiu_01340 | 21680  | 5345   | 16336 | 21.9  | 99.85 |
| scaffold00708 | 83769 | 87293 | 3525  | 3.59  | C_unshiu_00162 | 5601   | 2086   | 3516  | 0.95  | 98.21 |
| scaffold00710 | 5908  | 12360 | 6453  | 6.61  | C_unshiu_00436 | 11005  | 4586   | 6420  | 3.02  | 99.04 |
| scaffold00710 | 12360 | 16883 | 4524  | 4.64  | C_unshiu_00436 | 4653   | 141    | 4513  | 2.12  | 98.72 |
| scaffold00710 | 21365 | 24565 | 3201  | 3.28  | C_unshiu_01768 | 3201   | 1      | 3201  | 6.43  | 100   |
| scaffold00710 | 26081 | 27552 | 1472  | 1.51  | C_unshiu_00787 | 108338 | 106867 | 1472  | 1.13  | 100   |
| scaffold00710 | 26083 | 29925 | 3843  | 3.94  | C_unshiu_02100 | 19924  | 23766  | 3843  | 10.53 | 100   |
| scaffold00710 | 41368 | 42811 | 1444  | 1.48  | C_unshiu_01768 | 13206  | 11763  | 1444  | 2.9   | 100   |
| scaffold00710 | 47765 | 57142 | 9378  | 9.61  | C_unshiu_00084 | 4426   | 13782  | 9357  | 1.98  | 99.41 |
| scaffold00710 | 57162 | 58824 | 1663  | 1.7   | C_unshiu_01795 | 41211  | 42873  | 1663  | 3.42  | 100   |
| scaffold00710 | 61316 | 64608 | 3293  | 3.37  | C_unshiu_01795 | 45328  | 48612  | 3285  | 6.76  | 99.36 |
| scaffold00710 | 69519 | 78938 | 9420  | 9.65  | C_unshiu_00084 | 24436  | 33882  | 9447  | 2     | 98.7  |
| scaffold00710 | 78930 | 86580 | 7651  | 7.84  | C_unshiu_00084 | 34749  | 42379  | 7631  | 1.62  | 98.08 |
| scaffold00711 | 12261 | 13982 | 1722  | 1.77  | C_unshiu_01578 | 29529  | 31252  | 1724  | 2.94  | 99.42 |
| scaffold00711 | 14115 | 17359 | 3245  | 3.33  | C_unshiu_01578 | 31796  | 35007  | 3212  | 5.47  | 98.28 |
| scaffold00711 | 18237 | 22285 | 4049  | 4.15  | C_unshiu_01578 | 36033  | 40081  | 4049  | 6.9   | 99.98 |
| scaffold00711 | 23594 | 27540 | 3947  | 4.05  | C_unshiu_01578 | 41866  | 45812  | 3947  | 6.72  | 99.85 |
| scaffold00711 | 27533 | 33294 | 5762  | 5.91  | C_unshiu_01727 | 24888  | 19127  | 5762  | 11.17 | 100   |
| scaffold00711 | 81889 | 83732 | 1844  | 1.89  | C_unshiu_00787 | 108332 | 110175 | 1844  | 1.41  | 99.89 |
| scaffold00711 | 88048 | 90308 | 2261  | 2.32  | C_unshiu_00787 | 111797 | 114057 | 2261  | 1.73  | 100   |
| scaffold00711 | 91030 | 94083 | 3054  | 3.13  | C_unshiu_00787 | 115102 | 118156 | 3055  | 2.34  | 99.8  |
| scaffold00711 | 96130 | 97549 | 1420  | 1.46  | C_unshiu_00575 | 12897  | 14316  | 1420  | 0.82  | 98.87 |
| scaffold00712 | 1738  | 9983  | 8246  | 8.46  | C_unshiu_00283 | 28687  | 20495  | 8193  | 2.97  | 98.72 |
| scaffold00712 | 13516 | 14664 | 1149  | 1.18  | C_unshiu_00283 | 20493  | 19341  | 1153  | 0.42  | 99.05 |
| scaffold00712 | 16734 | 23242 | 6509  | 6.68  | C_unshiu_00283 | 18535  | 12012  | 6524  | 2.37  | 99.46 |
| scaffold00712 | 36953 | 38125 | 1173  | 1.2   | C_unshiu_01457 | 7400   | 8571   | 1172  | 1.78  | 99.74 |
| scaffold00712 | 38574 | 41490 | 2917  | 2.99  | C_unshiu_01457 | 9493   | 12409  | 2917  | 4.42  | 99.97 |
| scaffold00712 | 44318 | 45611 | 1294  | 1.33  | C_unshiu_00283 | 7610   | 8907   | 1298  | 0.47  | 99.31 |
| scaffold00712 | 88903 | 89944 | 1042  | 1.07  | C_unshiu_01457 | 64977  | 66017  | 1041  | 1.58  | 98.46 |
| scaffold00713 | 11309 | 15065 | 3757  | 3.87  | C_unshiu_00733 | 19287  | 15531  | 3757  | 2.71  | 99.95 |
| scaffold00713 | 17167 | 22344 | 5178  | 5.33  | C_unshiu_00733 | 12791  | 7608   | 5184  | 3.74  | 98.13 |
| scaffold00713 | 19214 | 22450 | 3237  | 3.33  | C_unshiu_01094 | 82498  | 85734  | 3237  | 3.35  | 99.44 |
| scaffold00713 | 23951 | 25573 | 1623  | 1.67  | C_unshiu_01094 | 86469  | 88092  | 1624  | 1.68  | 98.71 |
| scaffold00713 | 25573 | 35294 | 9722  | 10.01 | C_unshiu_01890 | 40808  | 31078  | 9731  | 21.6  | 99.62 |
| scaffold00713 | 40075 | 44862 | 4788  | 4.93  | C_unshiu_01890 | 26008  | 21221  | 4788  | 10.63 | 99.92 |
| scaffold00713 | 59413 | 60474 | 1062  | 1.09  | C_unshiu_01030 | 20599  | 19540  | 1060  | 1.03  | 99.53 |
| scaffold00713 | 62422 | 64238 | 1817  | 1.87  | C_unshiu_01030 | 17542  | 15726  | 1817  | 1.76  | 100   |
| scaffold00713 | 69023 | 76033 | 7011  | 7.22  | C_unshiu_01030 | 10870  | 3860   | 7011  | 6.81  | 99.67 |
| scaffold00713 | 75327 | 78555 | 3229  | 3.33  | C_unshiu_01030 | 14916  | 11688  | 3229  | 3.13  | 99.66 |
| scaffold00713 | 81676 | 86041 | 4366  | 4.5   | C_unshiu_00953 | 71471  | 67107  | 4365  | 3.92  | 99.77 |
| scaffold00713 | 86042 | 87523 | 1482  | 1.53  | C_unshiu_00953 | 107525 | 109006 | 1482  | 1.33  | 99.87 |
| scaffold00713 | 87534 | 88630 | 1097  | 1.13  | C_unshiu_00953 | 65788  | 64679  | 1110  | 1     | 98.02 |
| scaffold00713 | 91529 | 94143 | 2615  | 2.69  | C_unshiu_00953 | 64793  | 62179  | 2615  | 2.35  | 99.54 |
| scaffold00715 | 1301  | 3338  | 2038  | 2.11  | C_unshiu_00570 | 143391 | 145427 | 2037  | 1.17  | 98.54 |
| scaffold00715 | 14317 | 17917 | 3601  | 3.72  | C_unshiu_03086 | 2183   | 5712   | 3530  | 35.71 | 98.03 |
| scaffold00715 | 25138 | 26829 | 1692  | 1.75  | C_unshiu_02553 | 1      | 1692   | 1692  | 7.31  | 100   |
| scaffold00715 | 38763 | 45816 | 7054  | 7.29  | C_unshiu_02553 | 13307  | 20360  | 7054  | 30.46 | 100   |

|               |       |       |       |       |                |        |        |       |       |       |
|---------------|-------|-------|-------|-------|----------------|--------|--------|-------|-------|-------|
| scaffold00715 | 54199 | 70965 | 16767 | 17.32 | C_unshiu_00021 | 25202  | 42002  | 16801 | 2.14  | 99.01 |
| scaffold00715 | 72528 | 76041 | 3514  | 3.63  | C_unshiu_00021 | 43882  | 47395  | 3514  | 0.45  | 99.49 |
| scaffold00715 | 88073 | 96801 | 8729  | 9.02  | C_unshiu_00304 | 48575  | 39847  | 8729  | 3.3   | 99.82 |
| scaffold00717 | 70    | 1423  | 1354  | 1.4   | C_unshiu_00964 | 5198   | 6547   | 1350  | 1.22  | 98.09 |
| scaffold00717 | 3127  | 8028  | 4902  | 5.08  | C_unshiu_00964 | 8584   | 13486  | 4903  | 4.44  | 98.82 |
| scaffold00717 | 11681 | 21850 | 10170 | 10.54 | C_unshiu_00964 | 14379  | 24514  | 10136 | 9.18  | 99.44 |
| scaffold00717 | 25167 | 26256 | 1090  | 1.13  | C_unshiu_00964 | 28629  | 29718  | 1090  | 0.99  | 100   |
| scaffold00717 | 33706 | 43221 | 9516  | 9.86  | C_unshiu_02013 | 39500  | 30005  | 9496  | 23.65 | 98.7  |
| scaffold00717 | 45430 | 48774 | 3345  | 3.47  | C_unshiu_00372 | 179722 | 176378 | 3345  | 1.44  | 100   |
| scaffold00717 | 48766 | 50707 | 1942  | 2.01  | C_unshiu_02013 | 24762  | 22821  | 1942  | 4.84  | 100   |
| scaffold00717 | 53232 | 55378 | 2147  | 2.22  | C_unshiu_00232 | 306557 | 304411 | 2147  | 0.7   | 99.91 |
| scaffold00717 | 58830 | 61378 | 2549  | 2.64  | C_unshiu_00959 | 28491  | 25943  | 2549  | 2.3   | 100   |
| scaffold00717 | 58836 | 61388 | 2553  | 2.65  | C_unshiu_00239 | 138683 | 136131 | 2553  | 0.84  | 100   |
| scaffold00717 | 61379 | 63493 | 2115  | 2.19  | C_unshiu_00232 | 299153 | 297039 | 2115  | 0.69  | 99.91 |
| scaffold00717 | 68286 | 69550 | 1265  | 1.31  | C_unshiu_01092 | 15715  | 14451  | 1265  | 1.31  | 100   |
| scaffold00717 | 71394 | 73623 | 2230  | 2.31  | C_unshiu_01405 | 36899  | 39128  | 2230  | 3.18  | 100   |
| scaffold00717 | 78261 | 85449 | 7189  | 7.45  | C_unshiu_00232 | 292033 | 284873 | 7161  | 2.34  | 98.78 |
| scaffold00717 | 85450 | 86632 | 1183  | 1.23  | C_unshiu_00232 | 283698 | 284884 | 1187  | 0.39  | 99.33 |
| scaffold00717 | 90728 | 93569 | 2842  | 2.95  | C_unshiu_00232 | 278283 | 275440 | 2844  | 0.93  | 99.54 |
| scaffold00717 | 93641 | 94964 | 1324  | 1.37  | C_unshiu_00242 | 75348  | 74025  | 1324  | 0.44  | 100   |
| scaffold00718 | 1     | 1904  | 1904  | 1.98  | C_unshiu_00565 | 168106 | 169998 | 1893  | 1.08  | 99.11 |
| scaffold00718 | 6408  | 10942 | 4535  | 4.72  | C_unshiu_00285 | 106094 | 101554 | 4541  | 1.66  | 99.43 |
| scaffold00718 | 10944 | 25288 | 14345 | 14.94 | C_unshiu_02168 | 26881  | 12538  | 14344 | 41.59 | 99.6  |
| scaffold00718 | 25389 | 28291 | 2903  | 3.02  | C_unshiu_02168 | 12420  | 9518   | 2903  | 8.42  | 99.97 |
| scaffold00718 | 38241 | 40567 | 2327  | 2.42  | C_unshiu_02168 | 2322   | 1      | 2322  | 6.73  | 99.44 |
| scaffold00718 | 49239 | 55744 | 6506  | 6.78  | C_unshiu_00565 | 165364 | 158860 | 6505  | 3.72  | 99.94 |
| scaffold00718 | 55745 | 58190 | 2446  | 2.55  | C_unshiu_00040 | 499111 | 496666 | 2446  | 0.37  | 100   |
| scaffold00718 | 60526 | 78641 | 18116 | 18.87 | C_unshiu_00565 | 154345 | 136244 | 18102 | 10.35 | 99.87 |
| scaffold00718 | 81016 | 83249 | 2234  | 2.33  | C_unshiu_01405 | 34449  | 32221  | 2229  | 3.18  | 99.42 |
| scaffold00718 | 84862 | 86299 | 1438  | 1.5   | C_unshiu_01405 | 30973  | 29536  | 1438  | 2.05  | 98.96 |
| scaffold00718 | 87648 | 88905 | 1258  | 1.31  | C_unshiu_01405 | 28312  | 27055  | 1258  | 1.79  | 99.28 |
| scaffold00718 | 88913 | 90507 | 1595  | 1.66  | C_unshiu_01405 | 26871  | 25277  | 1595  | 2.27  | 99.37 |
| scaffold00718 | 92107 | 95008 | 2902  | 3.02  | C_unshiu_00548 | 24443  | 27354  | 2912  | 1.63  | 98.84 |
| scaffold00719 | 7525  | 51759 | 44235 | 46.06 | C_unshiu_00929 | 44222  | 1      | 44222 | 38.88 | 99.9  |
| scaffold00719 | 50878 | 64743 | 13866 | 14.44 | C_unshiu_01133 | 75571  | 89478  | 13908 | 15.04 | 99.45 |
| scaffold00719 | 74629 | 79335 | 4707  | 4.9   | C_unshiu_01509 | 15983  | 11312  | 4672  | 7.45  | 98.47 |
| scaffold00719 | 78846 | 90521 | 11676 | 12.16 | C_unshiu_01509 | 11681  | 1      | 11681 | 18.63 | 99.45 |
| scaffold00720 | 492   | 7542  | 7051  | 7.4   | C_unshiu_01158 | 9735   | 2685   | 7051  | 7.84  | 99.73 |
| scaffold00720 | 13396 | 16205 | 2810  | 2.95  | C_unshiu_00677 | 42490  | 45299  | 2810  | 1.88  | 98.75 |
| scaffold00720 | 18561 | 22240 | 3680  | 3.86  | C_unshiu_00677 | 48274  | 51937  | 3664  | 2.46  | 98.59 |
| scaffold00720 | 47934 | 53450 | 5517  | 5.79  | C_unshiu_01952 | 36869  | 31357  | 5513  | 12.96 | 99.73 |
| scaffold00720 | 57220 | 62455 | 5236  | 5.49  | C_unshiu_01675 | 36730  | 41984  | 5255  | 9.76  | 99.45 |
| scaffold00720 | 62469 | 64006 | 1538  | 1.61  | C_unshiu_01675 | 42800  | 44337  | 1538  | 2.86  | 100   |
| scaffold00720 | 64449 | 67132 | 2684  | 2.82  | C_unshiu_01675 | 45105  | 47788  | 2684  | 4.98  | 100   |
| scaffold00720 | 68031 | 70284 | 2254  | 2.36  | C_unshiu_01675 | 49430  | 51685  | 2256  | 4.19  | 99.47 |
| scaffold00720 | 85652 | 89019 | 3368  | 3.53  | C_unshiu_00612 | 138011 | 134644 | 3368  | 2.05  | 99.97 |
| scaffold00721 | 6645  | 15693 | 9049  | 9.69  | C_unshiu_00226 | 129526 | 138579 | 9054  | 2.91  | 99.22 |
| scaffold00721 | 27200 | 29117 | 1918  | 2.05  | C_unshiu_00226 | 127462 | 125554 | 1909  | 0.61  | 98.23 |
| scaffold00721 | 65962 | 76166 | 10205 | 10.93 | C_unshiu_01932 | 15091  | 4868   | 10224 | 23.51 | 99.6  |
| scaffold00721 | 79495 | 82383 | 2889  | 3.09  | C_unshiu_00350 | 204862 | 201974 | 2889  | 1.2   | 99.93 |
| scaffold00721 | 82927 | 84646 | 1720  | 1.84  | C_unshiu_00350 | 201027 | 199308 | 1720  | 0.71  | 99.42 |
| scaffold00722 | 1     | 2982  | 2982  | 3.2   | C_unshiu_00224 | 55835  | 52854  | 2982  | 0.95  | 100   |
| scaffold00722 | 4421  | 5952  | 1532  | 1.64  | C_unshiu_00224 | 51103  | 49572  | 1532  | 0.49  | 100   |
| scaffold00722 | 6794  | 8030  | 1237  | 1.33  | C_unshiu_00224 | 48533  | 47297  | 1237  | 0.4   | 99.6  |
| scaffold00722 | 8050  | 9443  | 1394  | 1.5   | C_unshiu_00224 | 45587  | 44185  | 1403  | 0.45  | 98.36 |
| scaffold00722 | 10296 | 13732 | 3437  | 3.69  | C_unshiu_00224 | 42694  | 39228  | 3467  | 1.11  | 98.56 |
| scaffold00722 | 14852 | 19408 | 4557  | 4.89  | C_unshiu_00224 | 35624  | 31059  | 4566  | 1.46  | 98.1  |
| scaffold00722 | 25292 | 47106 | 21815 | 23.41 | C_unshiu_00224 | 23374  | 1555   | 21820 | 6.98  | 99.54 |
| scaffold00722 | 48214 | 53339 | 5126  | 5.5   | C_unshiu_00458 | 140841 | 135716 | 5126  | 2.5   | 99.71 |
| scaffold00722 | 53340 | 55228 | 1889  | 2.03  | C_unshiu_00994 | 89427  | 87539  | 1889  | 1.77  | 100   |
| scaffold00722 | 60183 | 61625 | 1443  | 1.55  | C_unshiu_00458 | 126986 | 125544 | 1443  | 0.7   | 99.58 |
| scaffold00722 | 66530 | 70233 | 3704  | 3.98  | C_unshiu_00458 | 72428  | 68729  | 3700  | 1.8   | 98.03 |
| scaffold00722 | 72982 | 74071 | 1090  | 1.17  | C_unshiu_00458 | 66223  | 65134  | 1090  | 0.53  | 98.9  |
| scaffold00722 | 74391 | 77955 | 3565  | 3.83  | C_unshiu_00290 | 202622 | 206186 | 3565  | 1.32  | 100   |
| scaffold00722 | 86419 | 88876 | 2458  | 2.64  | C_unshiu_00458 | 116625 | 114182 | 2444  | 1.19  | 99.02 |
| scaffold00723 | 3     | 41278 | 41276 | 44.33 | C_unshiu_00947 | 45371  | 4091   | 41281 | 36.91 | 99.96 |
| scaffold00723 | 43479 | 44604 | 1126  | 1.21  | C_unshiu_01064 | 5721   | 6845   | 1125  | 1.14  | 99.56 |
| scaffold00723 | 45135 | 50406 | 5272  | 5.66  | C_unshiu_01064 | 7401   | 12672  | 5272  | 5.33  | 99.87 |
| scaffold00723 | 50399 | 51695 | 1297  | 1.39  | C_unshiu_01656 | 9920   | 11216  | 1297  | 2.36  | 100   |
| scaffold00723 | 51696 | 66383 | 14688 | 15.77 | C_unshiu_01064 | 14398  | 29086  | 14689 | 14.84 | 99.93 |
| scaffold00724 | 6288  | 8041  | 1754  | 1.88  | C_unshiu_00174 | 360163 | 358423 | 1741  | 0.48  | 98.97 |
| scaffold00724 | 8397  | 33297 | 24901 | 26.75 | C_unshiu_00174 | 357730 | 332816 | 24915 | 6.84  | 99.63 |
| scaffold00724 | 33667 | 35536 | 1870  | 2.01  | C_unshiu_00104 | 90037  | 88168  | 1870  | 0.41  | 100   |
| scaffold00724 | 40415 | 42556 | 2142  | 2.3   | C_unshiu_00174 | 327153 | 325012 | 2142  | 0.59  | 100   |
| scaffold00724 | 42551 | 45147 | 2597  | 2.79  | C_unshiu_01552 | 16077  | 18673  | 2597  | 4.3   | 100   |
| scaffold00724 | 51174 | 53755 | 2582  | 2.77  | C_unshiu_02392 | 27428  | 24866  | 2563  | 9.34  | 98.99 |
| scaffold00724 | 62755 | 76376 | 13622 | 14.63 | C_unshiu_02392 | 17032  | 3539   | 13494 | 49.2  | 98.18 |
| scaffold00726 | 11837 | 34996 | 23160 | 25.04 | C_unshiu_01132 | 66939  | 90180  | 23242 | 25.11 | 99.51 |
| scaffold00726 | 33362 | 40806 | 7445  | 8.05  | C_unshiu_01624 | 56493  | 49032  | 7462  | 13.21 | 99.57 |

|               |       |       |       |       |                |        |        |       |       |       |
|---------------|-------|-------|-------|-------|----------------|--------|--------|-------|-------|-------|
| scaffold00726 | 41880 | 45201 | 3322  | 3.59  | C_unshiu_01624 | 43395  | 40069  | 3327  | 5.89  | 99.28 |
| scaffold00726 | 46683 | 52282 | 5600  | 6.06  | C_unshiu_01624 | 49072  | 43474  | 5599  | 9.91  | 99.98 |
| scaffold00726 | 56428 | 82995 | 26568 | 28.73 | C_unshiu_01624 | 40069  | 13502  | 26568 | 47.03 | 100   |
| scaffold00726 | 84645 | 89810 | 5166  | 5.59  | C_unshiu_01624 | 12873  | 7708   | 5166  | 9.14  | 100   |
| scaffold00727 | 27095 | 29436 | 2342  | 2.53  | C_unshiu_00977 | 103358 | 101015 | 2344  | 2.15  | 99.06 |
| scaffold00727 | 30480 | 35369 | 4890  | 5.29  | C_unshiu_00977 | 99885  | 94990  | 4896  | 4.5   | 98.51 |
| scaffold00727 | 35705 | 37311 | 1607  | 1.74  | C_unshiu_00977 | 94572  | 92964  | 1609  | 1.48  | 99.88 |
| scaffold00727 | 41053 | 64422 | 23370 | 25.29 | C_unshiu_00977 | 92403  | 69026  | 23378 | 21.47 | 98.08 |
| scaffold00727 | 66672 | 68780 | 2109  | 2.28  | C_unshiu_00977 | 66343  | 64236  | 2108  | 1.94  | 99.95 |
| scaffold00727 | 68969 | 73454 | 4486  | 4.85  | C_unshiu_00977 | 64014  | 59535  | 4480  | 4.11  | 99.82 |
| scaffold00727 | 74271 | 75850 | 1580  | 1.71  | C_unshiu_00750 | 135697 | 134132 | 1566  | 1.15  | 98.1  |
| scaffold00727 | 75845 | 77647 | 1803  | 1.95  | C_unshiu_00046 | 89441  | 91243  | 1803  | 0.28  | 100   |
| scaffold00727 | 81888 | 87540 | 5653  | 6.12  | C_unshiu_00750 | 127939 | 122287 | 5653  | 4.14  | 100   |
| scaffold00727 | 87700 | 90816 | 3117  | 3.37  | C_unshiu_00750 | 122096 | 118980 | 3117  | 2.28  | 99.9  |
| scaffold00728 | 4165  | 6221  | 2057  | 2.24  | C_unshiu_00147 | 41024  | 38982  | 2043  | 0.52  | 98.69 |
| scaffold00728 | 8186  | 10041 | 1856  | 2.02  | C_unshiu_00147 | 38658  | 36803  | 1856  | 0.48  | 99.73 |
| scaffold00728 | 10589 | 12437 | 1849  | 2.01  | C_unshiu_00147 | 35873  | 34025  | 1849  | 0.47  | 100   |
| scaffold00728 | 12889 | 16463 | 3575  | 3.89  | C_unshiu_00147 | 33314  | 29736  | 3579  | 0.92  | 99.41 |
| scaffold00728 | 20107 | 23258 | 3152  | 3.43  | C_unshiu_00147 | 22688  | 19519  | 3170  | 0.81  | 99.12 |
| scaffold00728 | 23284 | 27032 | 3749  | 4.08  | C_unshiu_00033 | 292204 | 288475 | 3730  | 0.53  | 98.4  |
| scaffold00728 | 36136 | 40008 | 3873  | 4.21  | C_unshiu_00555 | 122121 | 118259 | 3863  | 2.18  | 98.17 |
| scaffold00728 | 40240 | 42118 | 1879  | 2.04  | C_unshiu_00555 | 117605 | 115727 | 1879  | 1.06  | 100   |
| scaffold00728 | 49939 | 54716 | 4778  | 5.2   | C_unshiu_03134 | 2044   | 6781   | 4738  | 69.87 | 98.43 |
| scaffold00728 | 64730 | 79075 | 14346 | 15.61 | C_unshiu_02862 | 16529  | 2191   | 14339 | 86.75 | 99.48 |
| scaffold00728 | 79222 | 80433 | 1212  | 1.32  | C_unshiu_00126 | 379301 | 380512 | 1212  | 0.29  | 100   |
| scaffold00728 | 81766 | 84462 | 2697  | 2.93  | C_unshiu_02402 | 2116   | 4798   | 2683  | 9.86  | 98    |
| scaffold00728 | 88087 | 91930 | 3844  | 4.18  | C_unshiu_02402 | 8047   | 11924  | 3878  | 14.25 | 98.64 |
| scaffold00729 | 3518  | 6847  | 3330  | 3.63  | C_unshiu_00434 | 207894 | 204563 | 3332  | 1.56  | 98.77 |
| scaffold00729 | 12502 | 16503 | 4002  | 4.36  | C_unshiu_00434 | 199453 | 195446 | 4008  | 1.87  | 98.85 |
| scaffold00729 | 16684 | 17785 | 1102  | 1.2   | C_unshiu_00434 | 195032 | 193929 | 1104  | 0.52  | 99.55 |
| scaffold00729 | 24915 | 26597 | 1683  | 1.83  | C_unshiu_00434 | 188316 | 186631 | 1686  | 0.79  | 99.23 |
| scaffold00729 | 26596 | 28761 | 2166  | 2.36  | C_unshiu_01254 | 68023  | 65865  | 2159  | 2.68  | 99.12 |
| scaffold00729 | 32058 | 33742 | 1685  | 1.83  | C_unshiu_01254 | 66426  | 64742  | 1685  | 2.09  | 98.87 |
| scaffold00729 | 33475 | 37589 | 4115  | 4.48  | C_unshiu_00218 | 308873 | 312988 | 4116  | 1.29  | 99.49 |
| scaffold00729 | 37685 | 44499 | 6815  | 7.42  | C_unshiu_00218 | 313131 | 319933 | 6803  | 2.13  | 98.73 |
| scaffold00730 | 1672  | 8439  | 6768  | 7.38  | C_unshiu_00794 | 77854  | 84621  | 6768  | 5.25  | 99.93 |
| scaffold00730 | 10684 | 21570 | 10887 | 11.87 | C_unshiu_00794 | 87536  | 98422  | 10887 | 8.45  | 100   |
| scaffold00730 | 24723 | 30075 | 5353  | 5.84  | C_unshiu_00794 | 101596 | 106948 | 5353  | 4.15  | 100   |
| scaffold00730 | 30145 | 32263 | 2119  | 2.31  | C_unshiu_00794 | 107047 | 109165 | 2119  | 1.64  | 100   |
| scaffold00730 | 33250 | 34998 | 1749  | 1.91  | C_unshiu_00794 | 111116 | 112865 | 1750  | 1.36  | 99.89 |
| scaffold00730 | 35384 | 50592 | 15209 | 16.58 | C_unshiu_00794 | 113606 | 128836 | 15231 | 11.82 | 99.84 |
| scaffold00730 | 61230 | 62611 | 1382  | 1.51  | C_unshiu_02835 | 11479  | 10098  | 1382  | 8.1   | 100   |
| scaffold00730 | 68794 | 70624 | 1831  | 2     | C_unshiu_02835 | 4113   | 2283   | 1831  | 10.74 | 100   |
| scaffold00730 | 88451 | 89753 | 1303  | 1.42  | C_unshiu_00383 | 197707 | 199009 | 1303  | 0.57  | 100   |
| scaffold00731 | 23685 | 28401 | 4717  | 5.16  | C_unshiu_00839 | 47686  | 42959  | 4728  | 3.82  | 98.38 |
| scaffold00731 | 28598 | 34510 | 5913  | 6.47  | C_unshiu_00839 | 42620  | 36693  | 5928  | 4.79  | 98.67 |
| scaffold00731 | 59186 | 62615 | 3430  | 3.75  | C_unshiu_01276 | 29059  | 32488  | 3430  | 4.34  | 100   |
| scaffold00731 | 62624 | 65131 | 2508  | 2.74  | C_unshiu_00839 | 12637  | 10130  | 2508  | 2.03  | 100   |
| scaffold00731 | 64834 | 70720 | 5887  | 6.44  | C_unshiu_00839 | 6120   | 233    | 5888  | 4.76  | 99.46 |
| scaffold00732 | 1238  | 9785  | 8548  | 9.35  | C_unshiu_02291 | 30066  | 21540  | 8527  | 28.36 | 99.67 |
| scaffold00732 | 9846  | 11876 | 2031  | 2.22  | C_unshiu_02291 | 21647  | 19617  | 2031  | 6.76  | 99.8  |
| scaffold00732 | 14369 | 29167 | 14799 | 16.18 | C_unshiu_02291 | 18464  | 3682   | 14783 | 49.17 | 99.61 |
| scaffold00732 | 38156 | 73215 | 35060 | 38.34 | C_unshiu_00513 | 182855 | 147796 | 35060 | 18.72 | 99.99 |
| scaffold00732 | 81337 | 89065 | 7729  | 8.45  | C_unshiu_00513 | 139267 | 131543 | 7725  | 4.12  | 99.73 |
| scaffold00732 | 89751 | 91439 | 1689  | 1.85  | C_unshiu_00513 | 131543 | 129855 | 1689  | 0.9   | 100   |
| scaffold00735 | 44345 | 81807 | 37463 | 41.35 | C_unshiu_01503 | 18207  | 55684  | 37478 | 59.43 | 99.62 |
| scaffold00735 | 84123 | 85275 | 1153  | 1.27  | C_unshiu_00903 | 100728 | 99587  | 1142  | 0.98  | 98.09 |
| scaffold00735 | 88073 | 90608 | 2536  | 2.8   | C_unshiu_00903 | 97421  | 94902  | 2520  | 2.16  | 98.62 |
| scaffold00736 | 1     | 44511 | 44511 | 49.14 | C_unshiu_00123 | 44524  | 1      | 44524 | 10.59 | 99.95 |
| scaffold00736 | 27779 | 61679 | 33901 | 37.42 | C_unshiu_01114 | 17674  | 51588  | 33915 | 35.9  | 99.96 |
| scaffold00736 | 56943 | 90589 | 33647 | 37.14 | C_unshiu_02054 | 1      | 33684  | 33684 | 87.7  | 99.89 |
| scaffold00737 | 16407 | 19123 | 2717  | 3     | C_unshiu_02064 | 19991  | 17275  | 2717  | 7.12  | 99.85 |
| scaffold00737 | 24066 | 31215 | 7150  | 7.91  | C_unshiu_02064 | 12317  | 5169   | 7149  | 18.72 | 99.8  |
| scaffold00737 | 32268 | 35980 | 3713  | 4.11  | C_unshiu_02064 | 3667   | 1      | 3667  | 9.6   | 98.2  |
| scaffold00737 | 35030 | 36463 | 1434  | 1.59  | C_unshiu_01244 | 1415   | 1      | 1415  | 1.74  | 98.12 |
| scaffold00737 | 40514 | 49347 | 8834  | 9.77  | C_unshiu_01244 | 6790   | 15619  | 8830  | 10.84 | 98.96 |
| scaffold00737 | 61138 | 63004 | 1867  | 2.06  | C_unshiu_01244 | 20929  | 22795  | 1867  | 2.29  | 100   |
| scaffold00737 | 65238 | 66450 | 1213  | 1.34  | C_unshiu_01244 | 25111  | 26324  | 1214  | 1.49  | 99.34 |
| scaffold00737 | 68431 | 83253 | 14823 | 16.39 | C_unshiu_01244 | 28971  | 43796  | 14826 | 18.21 | 99.78 |
| scaffold00737 | 89071 | 90441 | 1371  | 1.52  | C_unshiu_01244 | 49158  | 50528  | 1371  | 1.68  | 100   |
| scaffold00738 | 3550  | 8259  | 4710  | 5.22  | C_unshiu_01484 | 38494  | 33785  | 4710  | 7.35  | 100   |
| scaffold00738 | 8498  | 11238 | 2741  | 3.04  | C_unshiu_01484 | 33049  | 30324  | 2726  | 4.26  | 98.73 |
| scaffold00738 | 10807 | 35406 | 24600 | 27.29 | C_unshiu_01484 | 30316  | 5717   | 24600 | 38.4  | 99.99 |
| scaffold00738 | 40633 | 42049 | 1417  | 1.57  | C_unshiu_01484 | 1417   | 1      | 1417  | 2.21  | 99.72 |
| scaffold00738 | 45463 | 90157 | 44695 | 49.57 | C_unshiu_00872 | 62186  | 106835 | 44650 | 37.2  | 99.64 |
| scaffold00739 | 7990  | 12854 | 4865  | 5.4   | C_unshiu_00780 | 78273  | 83134  | 4862  | 3.71  | 99.86 |
| scaffold00739 | 10109 | 18987 | 8879  | 9.86  | C_unshiu_00780 | 49358  | 40563  | 8796  | 6.71  | 98.15 |
| scaffold00739 | 18552 | 35206 | 16655 | 18.49 | C_unshiu_00392 | 206730 | 223332 | 16603 | 7.39  | 99.5  |
| scaffold00739 | 41999 | 54414 | 12416 | 13.78 | C_unshiu_02547 | 23400  | 10994  | 12407 | 53.02 | 99.85 |

|               |       |       |       |       |                |        |        |       |       |       |
|---------------|-------|-------|-------|-------|----------------|--------|--------|-------|-------|-------|
| scaffold00739 | 60468 | 65960 | 5493  | 6.1   | C_unshiu_02547 | 5492   | 1      | 5492  | 23.47 | 99.91 |
| scaffold00739 | 71778 | 84005 | 12228 | 13.58 | C_unshiu_00864 | 1      | 12274  | 12274 | 10.15 | 98.9  |
| scaffold00740 | 1     | 33032 | 33032 | 36.72 | C_unshiu_01668 | 52767  | 19972  | 32796 | 60.36 | 98.8  |
| scaffold00740 | 33153 | 49137 | 15985 | 17.77 | C_unshiu_01668 | 19971  | 4036   | 15936 | 29.33 | 98.97 |
| scaffold00740 | 54625 | 63635 | 9011  | 10.02 | C_unshiu_00481 | 52342  | 43363  | 8980  | 4.55  | 98.78 |
| scaffold00740 | 65146 | 66203 | 1058  | 1.18  | C_unshiu_00481 | 44164  | 43108  | 1057  | 0.54  | 98.02 |
| scaffold00740 | 68464 | 73420 | 4957  | 5.51  | C_unshiu_00481 | 40029  | 35073  | 4957  | 2.51  | 99.82 |
| scaffold00741 | 30    | 1360  | 1331  | 1.48  | C_unshiu_00642 | 27171  | 28501  | 1331  | 0.84  | 99.47 |
| scaffold00741 | 3963  | 7181  | 3219  | 3.58  | C_unshiu_02012 | 790    | 4015   | 3226  | 8.01  | 99.38 |
| scaffold00741 | 10632 | 15004 | 4373  | 4.87  | C_unshiu_00642 | 37089  | 41449  | 4361  | 2.75  | 98.38 |
| scaffold00741 | 20300 | 44680 | 24381 | 27.14 | C_unshiu_02012 | 15891  | 40251  | 24361 | 60.52 | 99.88 |
| scaffold00741 | 55692 | 58811 | 3120  | 3.47  | C_unshiu_00642 | 104314 | 107433 | 3120  | 1.97  | 98.56 |
| scaffold00741 | 66802 | 69882 | 3081  | 3.43  | C_unshiu_00642 | 69009  | 72108  | 3100  | 1.96  | 98.29 |
| scaffold00741 | 71402 | 72910 | 1509  | 1.68  | C_unshiu_00642 | 72620  | 74136  | 1517  | 0.96  | 98.16 |
| scaffold00741 | 73807 | 77110 | 3304  | 3.68  | C_unshiu_00642 | 74425  | 77733  | 3309  | 2.09  | 99.3  |
| scaffold00741 | 78615 | 83653 | 5039  | 5.61  | C_unshiu_00642 | 77998  | 83041  | 5044  | 3.19  | 98.3  |
| scaffold00742 | 1     | 5437  | 5437  | 6.05  | C_unshiu_01045 | 49514  | 55019  | 5506  | 5.44  | 98.73 |
| scaffold00742 | 5769  | 16207 | 10439 | 11.62 | C_unshiu_01045 | 56037  | 66473  | 10437 | 10.31 | 99.66 |
| scaffold00742 | 20262 | 28542 | 8281  | 9.22  | C_unshiu_01636 | 1      | 8325   | 8325  | 14.97 | 98.19 |
| scaffold00742 | 25065 | 47846 | 22782 | 25.36 | C_unshiu_01045 | 28350  | 5616   | 22735 | 22.46 | 99.04 |
| scaffold00742 | 48556 | 53277 | 4722  | 5.26  | C_unshiu_01045 | 4722   | 1      | 4722  | 4.67  | 100   |
| scaffold00742 | 61949 | 88437 | 26489 | 29.49 | C_unshiu_02431 | 1      | 26482  | 26482 | 99.22 | 99.89 |
| scaffold00743 | 1     | 1144  | 1144  | 1.28  | C_unshiu_01858 | 38176  | 37033  | 1144  | 2.48  | 100   |
| scaffold00743 | 1284  | 17637 | 16354 | 18.23 | C_unshiu_01858 | 35537  | 19245  | 16293 | 35.25 | 98.9  |
| scaffold00743 | 38987 | 42796 | 3810  | 4.25  | C_unshiu_00745 | 136853 | 133045 | 3809  | 2.78  | 98.74 |
| scaffold00743 | 53219 | 55146 | 1928  | 2.15  | C_unshiu_01014 | 72690  | 70763  | 1928  | 1.85  | 100   |
| scaffold00743 | 58976 | 86816 | 27841 | 31.03 | C_unshiu_01569 | 246    | 28025  | 27780 | 46.94 | 99.39 |
| scaffold00745 | 15299 | 26930 | 11632 | 13    | C_unshiu_02450 | 26215  | 14548  | 11668 | 44.51 | 98.44 |
| scaffold00745 | 28432 | 35717 | 7286  | 8.14  | C_unshiu_02450 | 14548  | 7260   | 7289  | 27.8  | 99.86 |
| scaffold00745 | 37379 | 39946 | 2568  | 2.87  | C_unshiu_02450 | 4897   | 2330   | 2568  | 9.8   | 99.96 |
| scaffold00745 | 56306 | 72167 | 15862 | 17.72 | C_unshiu_02170 | 18547  | 34442  | 15896 | 46.15 | 98.29 |
| scaffold00745 | 76106 | 81370 | 5265  | 5.88  | C_unshiu_01665 | 35175  | 40439  | 5265  | 9.68  | 99.94 |
| scaffold00745 | 81941 | 83301 | 1361  | 1.52  | C_unshiu_01665 | 41635  | 42995  | 1361  | 2.5   | 100   |
| scaffold00745 | 86641 | 87972 | 1332  | 1.49  | C_unshiu_01665 | 45237  | 46568  | 1332  | 2.45  | 100   |
| scaffold00745 | 87976 | 89500 | 1525  | 1.7   | C_unshiu_01665 | 43477  | 45001  | 1525  | 2.8   | 99.93 |
| scaffold00746 | 1     | 10719 | 10719 | 11.99 | C_unshiu_01289 | 10669  | 1      | 10669 | 13.63 | 98.82 |
| scaffold00746 | 31226 | 40498 | 9273  | 10.37 | C_unshiu_00862 | 121356 | 112100 | 9257  | 7.63  | 99.76 |
| scaffold00746 | 40521 | 41936 | 1416  | 1.58  | C_unshiu_01820 | 26328  | 27744  | 1417  | 2.96  | 99.93 |
| scaffold00746 | 45742 | 59194 | 13453 | 15.04 | C_unshiu_00862 | 106893 | 93503  | 13391 | 11.03 | 98.65 |
| scaffold00746 | 57208 | 81265 | 24058 | 26.9  | C_unshiu_01820 | 25733  | 1697   | 24037 | 50.26 | 99.43 |
| scaffold00747 | 5011  | 10199 | 5189  | 5.82  | C_unshiu_00474 | 18261  | 23447  | 5187  | 2.58  | 99.69 |
| scaffold00747 | 13965 | 25634 | 11670 | 13.1  | C_unshiu_00474 | 26364  | 38033  | 11670 | 5.81  | 99.98 |
| scaffold00747 | 25485 | 36342 | 10858 | 12.19 | C_unshiu_00474 | 37927  | 48783  | 10857 | 5.41  | 99.54 |
| scaffold00747 | 51334 | 70067 | 18734 | 21.03 | C_unshiu_00640 | 136903 | 155665 | 18763 | 11.85 | 99.77 |
| scaffold00747 | 71077 | 72425 | 1349  | 1.51  | C_unshiu_00640 | 156979 | 158318 | 1340  | 0.85  | 98.82 |
| scaffold00747 | 74686 | 75965 | 1280  | 1.44  | C_unshiu_00065 | 462952 | 464231 | 1280  | 0.23  | 100   |
| scaffold00747 | 76570 | 78839 | 2270  | 2.55  | C_unshiu_00065 | 464988 | 467260 | 2273  | 0.41  | 99.87 |
| scaffold00747 | 78847 | 88569 | 9723  | 10.91 | C_unshiu_00065 | 467698 | 477420 | 9723  | 1.76  | 100   |
| scaffold00748 | 2269  | 6083  | 3815  | 4.28  | C_unshiu_00663 | 64034  | 60220  | 3815  | 2.49  | 100   |
| scaffold00748 | 6076  | 10880 | 4805  | 5.4   | C_unshiu_02265 | 14035  | 18810  | 4776  | 15.42 | 98.44 |
| scaffold00748 | 13335 | 15838 | 2504  | 2.81  | C_unshiu_02265 | 22032  | 24535  | 2504  | 8.08  | 99.92 |
| scaffold00748 | 16084 | 21272 | 5189  | 5.83  | C_unshiu_02265 | 24966  | 30155  | 5190  | 16.75 | 99.94 |
| scaffold00748 | 28628 | 31435 | 2808  | 3.15  | C_unshiu_01236 | 74431  | 71632  | 2800  | 3.42  | 99.64 |
| scaffold00748 | 31526 | 49643 | 18118 | 20.34 | C_unshiu_01236 | 71507  | 53464  | 18044 | 22.03 | 99.31 |
| scaffold00748 | 52352 | 66276 | 13925 | 15.64 | C_unshiu_01236 | 49661  | 35783  | 13879 | 16.95 | 99.55 |
| scaffold00748 | 66652 | 68527 | 1876  | 2.11  | C_unshiu_01236 | 34816  | 32948  | 1869  | 2.28  | 98.67 |
| scaffold00748 | 75943 | 77395 | 1453  | 1.63  | C_unshiu_01236 | 23305  | 21850  | 1456  | 1.78  | 99.59 |
| scaffold00748 | 81525 | 82821 | 1297  | 1.46  | C_unshiu_01236 | 17445  | 16149  | 1297  | 1.58  | 99.77 |
| scaffold00748 | 87118 | 89061 | 1944  | 2.18  | C_unshiu_00174 | 62177  | 60225  | 1953  | 0.54  | 99.03 |
| scaffold00749 | 1485  | 11034 | 9550  | 10.8  | C_unshiu_02795 | 2656   | 12205  | 9550  | 53.09 | 100   |
| scaffold00749 | 12313 | 17414 | 5102  | 5.77  | C_unshiu_02795 | 12885  | 17989  | 5105  | 28.38 | 99.78 |
| scaffold00749 | 16669 | 24312 | 7644  | 8.65  | C_unshiu_01014 | 38077  | 45652  | 7576  | 7.25  | 98.88 |
| scaffold00749 | 25566 | 27860 | 2295  | 2.6   | C_unshiu_00607 | 1781   | 4075   | 2295  | 1.39  | 100   |
| scaffold00749 | 28255 | 33431 | 5177  | 5.86  | C_unshiu_00607 | 4844   | 10024  | 5181  | 3.13  | 98.3  |
| scaffold00749 | 33803 | 41554 | 7752  | 8.77  | C_unshiu_01014 | 53478  | 61180  | 7703  | 7.38  | 98.8  |
| scaffold00749 | 41631 | 42855 | 1225  | 1.39  | C_unshiu_01014 | 61581  | 62805  | 1225  | 1.17  | 100   |
| scaffold00749 | 42875 | 45191 | 2317  | 2.62  | C_unshiu_01014 | 64266  | 66582  | 2317  | 2.22  | 99.96 |
| scaffold00749 | 45199 | 46904 | 1706  | 1.93  | C_unshiu_00794 | 55267  | 53562  | 1706  | 1.32  | 99.36 |
| scaffold00749 | 47675 | 51630 | 3956  | 4.47  | C_unshiu_00046 | 158921 | 154966 | 3956  | 0.62  | 100   |
| scaffold00749 | 51631 | 53932 | 2302  | 2.6   | C_unshiu_00794 | 48565  | 46232  | 2334  | 1.81  | 98.54 |
| scaffold00749 | 55101 | 63594 | 8494  | 9.61  | C_unshiu_01014 | 84279  | 92789  | 8511  | 8.15  | 98.53 |
| scaffold00749 | 65786 | 73904 | 8119  | 9.18  | C_unshiu_00794 | 34535  | 26417  | 8119  | 6.3   | 100   |
| scaffold00749 | 74279 | 75307 | 1029  | 1.16  | C_unshiu_00794 | 25963  | 24936  | 1028  | 0.8   | 99.9  |
| scaffold00749 | 76479 | 80400 | 3922  | 4.44  | C_unshiu_00637 | 54118  | 50197  | 3922  | 2.46  | 100   |
| scaffold00749 | 81127 | 86932 | 5806  | 6.57  | C_unshiu_01014 | 46039  | 51846  | 5808  | 5.56  | 99.95 |
| scaffold00750 | 1     | 1977  | 1977  | 2.24  | C_unshiu_01141 | 44335  | 42341  | 1995  | 2.17  | 98.15 |
| scaffold00750 | 4709  | 7930  | 3222  | 3.65  | C_unshiu_01561 | 1      | 3226   | 3226  | 5.39  | 98.05 |
| scaffold00750 | 16509 | 19750 | 3242  | 3.67  | C_unshiu_01561 | 5341   | 8582   | 3242  | 5.42  | 99.78 |
| scaffold00750 | 22115 | 24789 | 2675  | 3.03  | C_unshiu_02087 | 21620  | 24294  | 2675  | 7.22  | 99.59 |

|               |       |       |       |       |                |        |        |       |       |       |
|---------------|-------|-------|-------|-------|----------------|--------|--------|-------|-------|-------|
| scaffold00750 | 30113 | 39353 | 9241  | 10.47 | C_unshiu_00730 | 111715 | 102498 | 9218  | 6.65  | 98.74 |
| scaffold00750 | 39712 | 44141 | 4430  | 5.02  | C_unshiu_00730 | 101985 | 97577  | 4409  | 3.18  | 99.17 |
| scaffold00750 | 44226 | 45542 | 1317  | 1.49  | C_unshiu_00730 | 97486  | 96170  | 1317  | 0.95  | 100   |
| scaffold00750 | 50833 | 64048 | 13216 | 14.98 | C_unshiu_00730 | 91164  | 77879  | 13286 | 9.58  | 98.44 |
| scaffold00751 | 5084  | 6286  | 1203  | 1.37  | C_unshiu_01258 | 49642  | 50844  | 1203  | 1.5   | 99.92 |
| scaffold00751 | 7519  | 8630  | 1112  | 1.26  | C_unshiu_00502 | 18948  | 20059  | 1112  | 0.58  | 100   |
| scaffold00751 | 16488 | 31144 | 14657 | 16.67 | C_unshiu_00352 | 14658  | 1      | 14658 | 6.11  | 99.94 |
| scaffold00751 | 32501 | 57946 | 25446 | 28.95 | C_unshiu_00352 | 81404  | 55964  | 25441 | 10.6  | 99.59 |
| scaffold00751 | 59242 | 60361 | 1120  | 1.27  | C_unshiu_00334 | 7850   | 6735   | 1116  | 0.44  | 98.22 |
| scaffold00751 | 60391 | 67815 | 7425  | 8.45  | C_unshiu_00352 | 53943  | 46529  | 7415  | 3.09  | 99.81 |
| scaffold00751 | 67389 | 71819 | 4431  | 5.04  | C_unshiu_00352 | 46531  | 42101  | 4431  | 1.85  | 99.91 |
| scaffold00751 | 70348 | 73279 | 2932  | 3.34  | C_unshiu_00352 | 231372 | 228469 | 2904  | 1.21  | 98.23 |
| scaffold00751 | 73277 | 77697 | 4421  | 5.03  | C_unshiu_00352 | 42224  | 37789  | 4436  | 1.85  | 99.32 |
| scaffold00752 | 5     | 13878 | 13874 | 15.82 | C_unshiu_00074 | 332879 | 346793 | 13915 | 2.71  | 99.2  |
| scaffold00752 | 19290 | 23483 | 4194  | 4.78  | C_unshiu_01678 | 1      | 4184   | 4184  | 7.8   | 99.74 |
| scaffold00752 | 23948 | 72681 | 48734 | 55.56 | C_unshiu_01678 | 4989   | 53623  | 48635 | 90.7  | 99.71 |
| scaffold00752 | 76246 | 82182 | 5937  | 6.77  | C_unshiu_02313 | 23520  | 17579  | 5942  | 20.12 | 99.85 |
| scaffold00752 | 83674 | 85081 | 1408  | 1.61  | C_unshiu_01407 | 1409   | 1      | 1409  | 2.01  | 99.79 |
| scaffold00752 | 86705 | 87721 | 1017  | 1.16  | C_unshiu_00128 | 141623 | 142639 | 1017  | 0.25  | 100   |
| scaffold00754 | 4358  | 15583 | 11226 | 12.83 | C_unshiu_02137 | 22560  | 11326  | 11235 | 31.77 | 99.72 |
| scaffold00754 | 15575 | 19565 | 3991  | 4.56  | C_unshiu_00421 | 93085  | 97075  | 3991  | 1.83  | 100   |
| scaffold00754 | 19566 | 22018 | 2453  | 2.8   | C_unshiu_02137 | 8126   | 5673   | 2454  | 6.94  | 99.88 |
| scaffold00754 | 22546 | 27880 | 5335  | 6.1   | C_unshiu_02137 | 5318   | 1      | 5318  | 15.04 | 99.59 |
| scaffold00754 | 31486 | 44701 | 13216 | 15.1  | C_unshiu_01696 | 36436  | 49653  | 13218 | 25.11 | 99.88 |
| scaffold00754 | 44944 | 48061 | 3118  | 3.56  | C_unshiu_00245 | 276243 | 273125 | 3119  | 1.04  | 99.23 |
| scaffold00754 | 53152 | 59854 | 6703  | 7.66  | C_unshiu_00245 | 299207 | 292513 | 6695  | 2.24  | 99.84 |
| scaffold00755 | 16647 | 22896 | 6250  | 7.18  | C_unshiu_00344 | 87096  | 80847  | 6250  | 2.52  | 99.79 |
| scaffold00755 | 24360 | 27303 | 2944  | 3.38  | C_unshiu_02308 | 26642  | 29587  | 2946  | 9.96  | 99.49 |
| scaffold00755 | 30586 | 37567 | 6982  | 8.02  | C_unshiu_00406 | 220986 | 214005 | 6982  | 3.15  | 99.99 |
| scaffold00755 | 37589 | 47719 | 10131 | 11.63 | C_unshiu_00406 | 213341 | 203211 | 10131 | 4.56  | 99.98 |
| scaffold00755 | 58193 | 79363 | 21171 | 24.31 | C_unshiu_02319 | 29276  | 8241   | 21036 | 71.85 | 99.23 |
| scaffold00755 | 76023 | 79366 | 3344  | 3.84  | C_unshiu_02984 | 1      | 3345   | 3345  | 25.07 | 99.97 |
| scaffold00755 | 79366 | 80380 | 1015  | 1.17  | C_unshiu_01165 | 55179  | 54165  | 1015  | 1.13  | 100   |
| scaffold00756 | 14036 | 19133 | 5098  | 5.87  | C_unshiu_00423 | 125272 | 130369 | 5098  | 2.34  | 99.98 |
| scaffold00756 | 19990 | 21162 | 1173  | 1.35  | C_unshiu_00423 | 131657 | 132829 | 1173  | 0.54  | 99.57 |
| scaffold00756 | 21427 | 23239 | 1813  | 2.09  | C_unshiu_00423 | 133310 | 135121 | 1812  | 0.83  | 98.68 |
| scaffold00756 | 27303 | 29905 | 2603  | 3     | C_unshiu_00423 | 138203 | 140802 | 2600  | 1.2   | 99.65 |
| scaffold00756 | 29918 | 40437 | 10520 | 12.11 | C_unshiu_02237 | 21564  | 32074  | 10511 | 32.77 | 99.22 |
| scaffold00756 | 44698 | 47672 | 2975  | 3.42  | C_unshiu_00423 | 167788 | 170762 | 2975  | 1.37  | 99.76 |
| scaffold00756 | 48152 | 54254 | 6103  | 7.02  | C_unshiu_00423 | 171644 | 177744 | 6101  | 2.8   | 99.54 |
| scaffold00756 | 54368 | 67619 | 13252 | 15.25 | C_unshiu_00423 | 178235 | 191491 | 13257 | 6.09  | 99.59 |
| scaffold00756 | 66954 | 74883 | 7930  | 9.13  | C_unshiu_00423 | 196781 | 204709 | 7929  | 3.65  | 99.14 |
| scaffold00756 | 74908 | 78215 | 3308  | 3.81  | C_unshiu_00423 | 204997 | 208336 | 3340  | 1.54  | 98.33 |
| scaffold00757 | 2743  | 16335 | 13593 | 15.69 | C_unshiu_00074 | 312228 | 325821 | 13594 | 2.65  | 99.74 |
| scaffold00757 | 22860 | 35319 | 12460 | 14.39 | C_unshiu_01585 | 1064   | 13487  | 12424 | 21.28 | 99.5  |
| scaffold00757 | 48914 | 53829 | 4916  | 5.68  | C_unshiu_01585 | 27675  | 32600  | 4926  | 8.44  | 99.01 |
| scaffold00757 | 58455 | 61886 | 3432  | 3.96  | C_unshiu_00358 | 47129  | 50560  | 3432  | 1.45  | 99.97 |
| scaffold00757 | 61935 | 63533 | 1599  | 1.85  | C_unshiu_01585 | 32510  | 34108  | 1599  | 2.74  | 100   |
| scaffold00757 | 63800 | 65811 | 2012  | 2.32  | C_unshiu_01585 | 34779  | 36793  | 2015  | 3.45  | 98.86 |
| scaffold00757 | 66076 | 67734 | 1659  | 1.92  | C_unshiu_01585 | 37231  | 38889  | 1659  | 2.84  | 100   |
| scaffold00757 | 67753 | 83642 | 15890 | 18.35 | C_unshiu_01585 | 39810  | 55534  | 15725 | 26.93 | 98.8  |
| scaffold00758 | 104   | 3450  | 3347  | 3.87  | C_unshiu_00051 | 140792 | 137472 | 3321  | 0.55  | 99.04 |
| scaffold00758 | 5971  | 7455  | 1485  | 1.72  | C_unshiu_00372 | 1      | 1485   | 1485  | 0.64  | 100   |
| scaffold00758 | 8644  | 14341 | 5698  | 6.59  | C_unshiu_00372 | 3243   | 8963   | 5721  | 2.47  | 98.92 |
| scaffold00758 | 15112 | 18209 | 3098  | 3.58  | C_unshiu_00372 | 10325  | 13422  | 3098  | 1.33  | 99.97 |
| scaffold00758 | 18216 | 20415 | 2200  | 2.54  | C_unshiu_00372 | 13713  | 15912  | 2200  | 0.95  | 100   |
| scaffold00758 | 25609 | 27717 | 2109  | 2.44  | C_unshiu_00372 | 17390  | 19499  | 2110  | 0.91  | 99.91 |
| scaffold00758 | 29732 | 30934 | 1203  | 1.39  | C_unshiu_00372 | 20815  | 22016  | 1202  | 0.52  | 99.92 |
| scaffold00758 | 36973 | 39320 | 2348  | 2.71  | C_unshiu_00372 | 27013  | 29360  | 2348  | 1.01  | 99.87 |
| scaffold00758 | 41101 | 44150 | 3050  | 3.53  | C_unshiu_00372 | 31703  | 34767  | 3065  | 1.32  | 98.57 |
| scaffold00758 | 48480 | 80888 | 32409 | 37.46 | C_unshiu_01621 | 6519   | 38680  | 32162 | 56.85 | 98.76 |
| scaffold00759 | 38135 | 45997 | 7863  | 9.09  | C_unshiu_01061 | 35016  | 42879  | 7864  | 7.94  | 99.77 |
| scaffold00759 | 46979 | 49121 | 2143  | 2.48  | C_unshiu_01061 | 43552  | 45698  | 2147  | 2.17  | 99.58 |
| scaffold00759 | 62492 | 66718 | 4227  | 4.89  | C_unshiu_01061 | 56516  | 60738  | 4223  | 4.26  | 98.96 |
| scaffold00759 | 69320 | 71265 | 1946  | 2.25  | C_unshiu_01061 | 74258  | 76204  | 1947  | 1.97  | 99.64 |
| scaffold00760 | 1     | 2641  | 2641  | 3.06  | C_unshiu_00482 | 130522 | 133167 | 2646  | 1.34  | 98.3  |
| scaffold00760 | 2641  | 8733  | 6093  | 7.05  | C_unshiu_00482 | 133472 | 139576 | 6105  | 3.09  | 99.46 |
| scaffold00760 | 24796 | 47944 | 23149 | 26.8  | C_unshiu_01753 | 44269  | 21090  | 23180 | 46.02 | 99.2  |
| scaffold00760 | 47970 | 58159 | 10190 | 11.8  | C_unshiu_00379 | 218214 | 207982 | 10233 | 4.44  | 99.27 |
| scaffold00760 | 58160 | 60704 | 2545  | 2.95  | C_unshiu_01423 | 41814  | 39270  | 2545  | 3.69  | 100   |
| scaffold00760 | 60695 | 63065 | 2371  | 2.74  | C_unshiu_00379 | 207078 | 204708 | 2371  | 1.03  | 100   |
| scaffold00760 | 68909 | 77959 | 9051  | 10.48 | C_unshiu_00379 | 199229 | 190178 | 9052  | 3.93  | 99.7  |
| scaffold00761 | 1     | 1745  | 1745  | 2.02  | C_unshiu_00019 | 835171 | 836915 | 1745  | 0.21  | 100   |
| scaffold00761 | 4669  | 6386  | 1718  | 1.99  | C_unshiu_00019 | 842283 | 843999 | 1717  | 0.2   | 98.72 |
| scaffold00761 | 10653 | 19950 | 9298  | 10.77 | C_unshiu_00352 | 126647 | 135963 | 9317  | 3.88  | 98.05 |
| scaffold00761 | 21912 | 28848 | 6937  | 8.04  | C_unshiu_00352 | 138295 | 145231 | 6937  | 2.89  | 99.47 |
| scaffold00761 | 29239 | 30704 | 1466  | 1.7   | C_unshiu_00352 | 145820 | 147287 | 1468  | 0.61  | 98.91 |
| scaffold00761 | 30329 | 36227 | 5899  | 6.83  | C_unshiu_00352 | 147155 | 153063 | 5909  | 2.46  | 99.17 |
| scaffold00761 | 36574 | 50853 | 14280 | 16.54 | C_unshiu_00352 | 154199 | 168505 | 14307 | 5.96  | 99.67 |

|               |       |       |       |       |                |        |        |       |       |       |
|---------------|-------|-------|-------|-------|----------------|--------|--------|-------|-------|-------|
| scaffold00761 | 54926 | 59899 | 4974  | 5.76  | C_unshiu_00352 | 171425 | 176405 | 4981  | 2.08  | 99.7  |
| scaffold00761 | 58701 | 69193 | 10493 | 12.15 | C_unshiu_00352 | 218156 | 228668 | 10513 | 4.38  | 98.59 |
| scaffold00761 | 69202 | 72329 | 3128  | 3.62  | C_unshiu_01445 | 58000  | 54873  | 3128  | 4.66  | 99.78 |
| scaffold00761 | 72997 | 75172 | 2176  | 2.52  | C_unshiu_01445 | 53842  | 51682  | 2161  | 3.22  | 98.85 |
| scaffold00761 | 75690 | 83515 | 7826  | 9.07  | C_unshiu_01445 | 50685  | 42872  | 7814  | 11.64 | 99.16 |
| scaffold00761 | 84630 | 86329 | 1700  | 1.97  | C_unshiu_01445 | 41562  | 39863  | 1700  | 2.53  | 99.76 |
| scaffold00762 | 6844  | 11363 | 4520  | 5.26  | C_unshiu_00236 | 36769  | 41311  | 4543  | 1.49  | 98.92 |
| scaffold00762 | 13277 | 37311 | 24035 | 27.97 | C_unshiu_00236 | 43203  | 67217  | 24015 | 7.88  | 99.12 |
| scaffold00762 | 40473 | 44413 | 3941  | 4.59  | C_unshiu_00308 | 214229 | 218174 | 3946  | 1.51  | 98.94 |
| scaffold00762 | 46365 | 53464 | 7100  | 8.26  | C_unshiu_00236 | 78840  | 85929  | 7090  | 2.33  | 99.32 |
| scaffold00762 | 46865 | 56793 | 9929  | 11.55 | C_unshiu_00308 | 218169 | 228108 | 9940  | 3.8   | 98.78 |
| scaffold00762 | 58621 | 61418 | 2798  | 3.26  | C_unshiu_00308 | 230609 | 233407 | 2799  | 1.07  | 99.39 |
| scaffold00762 | 64392 | 66131 | 1740  | 2.02  | C_unshiu_00120 | 63100  | 64840  | 1741  | 0.41  | 99.94 |
| scaffold00762 | 66350 | 71161 | 4812  | 5.6   | C_unshiu_00120 | 65167  | 69981  | 4815  | 1.14  | 99.81 |
| scaffold00762 | 72707 | 78482 | 5776  | 6.72  | C_unshiu_00120 | 71777  | 77553  | 5777  | 1.37  | 99.95 |
| scaffold00763 | 1     | 3266  | 3266  | 3.8   | C_unshiu_00267 | 246707 | 243441 | 3267  | 1.16  | 99.97 |
| scaffold00763 | 11506 | 22590 | 11085 | 12.91 | C_unshiu_02136 | 19961  | 31019  | 11059 | 31.18 | 98.5  |
| scaffold00763 | 22914 | 27187 | 4274  | 4.98  | C_unshiu_02136 | 31081  | 35352  | 4272  | 12.04 | 99.77 |
| scaffold00763 | 27695 | 36074 | 8380  | 9.76  | C_unshiu_01321 | 63151  | 54791  | 8361  | 11.09 | 98.41 |
| scaffold00763 | 36098 | 39365 | 3268  | 3.81  | C_unshiu_01321 | 53847  | 50580  | 3268  | 4.33  | 100   |
| scaffold00763 | 39454 | 42159 | 2706  | 3.15  | C_unshiu_01321 | 50329  | 47624  | 2706  | 3.59  | 99.7  |
| scaffold00763 | 42474 | 43770 | 1297  | 1.51  | C_unshiu_01321 | 47062  | 45764  | 1299  | 1.72  | 99.31 |
| scaffold00763 | 44544 | 45980 | 1437  | 1.67  | C_unshiu_01321 | 44723  | 43287  | 1437  | 1.91  | 99.86 |
| scaffold00763 | 45975 | 48743 | 2769  | 3.23  | C_unshiu_02157 | 23738  | 20970  | 2769  | 7.98  | 100   |
| scaffold00763 | 60502 | 65203 | 4702  | 5.48  | C_unshiu_02282 | 2558   | 7259   | 4702  | 15.53 | 99.72 |
| scaffold00763 | 68809 | 77418 | 8610  | 10.03 | C_unshiu_02282 | 9654   | 18263  | 8610  | 28.44 | 98.43 |
| scaffold00763 | 77951 | 80496 | 2546  | 2.97  | C_unshiu_00381 | 161868 | 164413 | 2546  | 1.11  | 100   |
| scaffold00764 | 3505  | 16975 | 13471 | 15.71 | C_unshiu_00140 | 1      | 13479  | 13479 | 3.35  | 98.6  |
| scaffold00764 | 17030 | 59041 | 42012 | 49    | C_unshiu_00140 | 13798  | 55858  | 42061 | 10.44 | 99.38 |
| scaffold00764 | 60954 | 67119 | 6166  | 7.19  | C_unshiu_00140 | 56745  | 62908  | 6164  | 1.53  | 99.85 |
| scaffold00765 | 14457 | 17267 | 2811  | 3.28  | C_unshiu_00793 | 29016  | 26192  | 2825  | 2.19  | 98.51 |
| scaffold00765 | 25884 | 29428 | 3545  | 4.14  | C_unshiu_00793 | 16698  | 13162  | 3537  | 2.74  | 99.1  |
| scaffold00765 | 36595 | 42598 | 6004  | 7.01  | C_unshiu_00793 | 10065  | 4030   | 6036  | 4.67  | 98.17 |
| scaffold00765 | 48559 | 53212 | 4654  | 5.43  | C_unshiu_02958 | 11340  | 6693   | 4648  | 32.76 | 98.86 |
| scaffold00765 | 53207 | 54768 | 1562  | 1.82  | C_unshiu_00980 | 75712  | 77273  | 1562  | 1.44  | 100   |
| scaffold00765 | 59136 | 66825 | 7690  | 8.98  | C_unshiu_02666 | 17772  | 10067  | 7706  | 37.44 | 98.61 |
| scaffold00765 | 65844 | 67136 | 1293  | 1.51  | C_unshiu_02899 | 1      | 1289   | 1289  | 8.2   | 98.99 |
| scaffold00766 | 4456  | 34102 | 29647 | 34.61 | C_unshiu_00770 | 32251  | 2605   | 29647 | 22.3  | 99.99 |
| scaffold00766 | 42793 | 47792 | 5000  | 5.84  | C_unshiu_00944 | 4632   | 9601   | 4970  | 4.43  | 98.9  |
| scaffold00766 | 49838 | 53597 | 3760  | 4.39  | C_unshiu_00944 | 12291  | 16050  | 3760  | 3.35  | 99.89 |
| scaffold00766 | 54353 | 82006 | 27654 | 32.28 | C_unshiu_00944 | 17628  | 45282  | 27655 | 24.67 | 99.86 |
| scaffold00766 | 81820 | 85502 | 3683  | 4.3   | C_unshiu_00944 | 45156  | 48838  | 3683  | 3.29  | 99.95 |
| scaffold00767 | 720   | 48652 | 47933 | 56.18 | C_unshiu_01343 | 73586  | 25673  | 47914 | 64.38 | 99.71 |
| scaffold00767 | 73170 | 78159 | 4990  | 5.85  | C_unshiu_01343 | 12547  | 7558   | 4990  | 6.7   | 100   |
| scaffold00767 | 80374 | 82281 | 1908  | 2.24  | C_unshiu_01343 | 5050   | 3143   | 1908  | 2.56  | 100   |
| scaffold00768 | 1     | 4829  | 4829  | 5.66  | C_unshiu_01707 | 3372   | 8186   | 4815  | 9.22  | 99.46 |
| scaffold00768 | 5617  | 10865 | 5249  | 6.16  | C_unshiu_01707 | 9375   | 14622  | 5248  | 10.05 | 99.7  |
| scaffold00768 | 13066 | 15428 | 2363  | 2.77  | C_unshiu_01390 | 19596  | 17234  | 2363  | 3.33  | 100   |
| scaffold00768 | 23519 | 29377 | 5859  | 6.87  | C_unshiu_01707 | 52201  | 46341  | 5861  | 11.23 | 99.69 |
| scaffold00768 | 30014 | 31343 | 1330  | 1.56  | C_unshiu_01707 | 45239  | 43913  | 1327  | 2.54  | 98.95 |
| scaffold00768 | 36122 | 40990 | 4869  | 5.71  | C_unshiu_01707 | 39755  | 34882  | 4874  | 9.34  | 98.73 |
| scaffold00768 | 45203 | 79115 | 33913 | 39.77 | C_unshiu_01920 | 114    | 34032  | 33919 | 77.13 | 99.98 |
| scaffold00768 | 59122 | 85264 | 26143 | 30.66 | C_unshiu_01920 | 14033  | 40049  | 26017 | 59.16 | 98.94 |
| scaffold00770 | 4604  | 10812 | 6209  | 7.35  | C_unshiu_01747 | 26058  | 19850  | 6209  | 12.26 | 100   |
| scaffold00770 | 10810 | 23389 | 12580 | 14.88 | C_unshiu_00604 | 2421   | 15003  | 12583 | 7.57  | 99.9  |
| scaffold00770 | 32927 | 48770 | 15844 | 18.75 | C_unshiu_00138 | 383400 | 367557 | 15844 | 3.92  | 99.99 |
| scaffold00770 | 49370 | 76579 | 27210 | 32.2  | C_unshiu_00138 | 366067 | 338870 | 27198 | 6.73  | 99.26 |
| scaffold00770 | 76582 | 81113 | 4532  | 5.36  | C_unshiu_00138 | 338660 | 334132 | 4529  | 1.12  | 99.65 |
| scaffold00771 | 5786  | 42837 | 37052 | 43.93 | C_unshiu_00605 | 99291  | 62242  | 37050 | 22.35 | 99.99 |
| scaffold00771 | 44639 | 64790 | 20152 | 23.89 | C_unshiu_00605 | 59595  | 39444  | 20152 | 12.16 | 100   |
| scaffold00771 | 65006 | 66359 | 1354  | 1.61  | C_unshiu_00605 | 39347  | 37996  | 1352  | 0.82  | 98.46 |
| scaffold00771 | 65620 | 73373 | 7754  | 9.19  | C_unshiu_00605 | 23350  | 31063  | 7714  | 4.65  | 99.03 |
| scaffold00771 | 66724 | 73470 | 6747  | 8     | C_unshiu_00605 | 37823  | 31071  | 6753  | 4.07  | 99.75 |
| scaffold00772 | 3186  | 4186  | 1001  | 1.19  | C_unshiu_00976 | 31175  | 30175  | 1001  | 0.92  | 98.8  |
| scaffold00772 | 31081 | 44054 | 12974 | 15.39 | C_unshiu_01287 | 78294  | 65320  | 12975 | 16.57 | 99.98 |
| scaffold00772 | 44857 | 84281 | 39425 | 46.77 | C_unshiu_01287 | 64136  | 24726  | 39411 | 50.34 | 99.46 |
| scaffold00773 | 8232  | 10005 | 1774  | 2.11  | C_unshiu_00658 | 55905  | 57678  | 1774  | 1.15  | 100   |
| scaffold00773 | 9998  | 14247 | 4250  | 5.06  | C_unshiu_00792 | 55371  | 59620  | 4250  | 3.29  | 99.76 |
| scaffold00773 | 12908 | 15035 | 2128  | 2.53  | C_unshiu_00792 | 53217  | 55344  | 2128  | 1.65  | 98.78 |
| scaffold00773 | 20189 | 30733 | 10545 | 12.56 | C_unshiu_00792 | 65053  | 75594  | 10542 | 8.16  | 99.85 |
| scaffold00773 | 31631 | 43860 | 12230 | 14.57 | C_unshiu_01661 | 12284  | 1      | 12284 | 22.53 | 99.22 |
| scaffold00773 | 66597 | 68955 | 2359  | 2.81  | C_unshiu_00792 | 105715 | 108073 | 2359  | 1.83  | 99.79 |
| scaffold00773 | 69140 | 71544 | 2405  | 2.86  | C_unshiu_00792 | 108427 | 110831 | 2405  | 1.86  | 100   |
| scaffold00773 | 77099 | 80310 | 3212  | 3.83  | C_unshiu_00784 | 121251 | 118035 | 3217  | 2.46  | 99.35 |
| scaffold00773 | 81042 | 83964 | 2923  | 3.48  | C_unshiu_00344 | 63796  | 60850  | 2947  | 1.19  | 98.17 |
| scaffold00774 | 1     | 4487  | 4487  | 5.35  | C_unshiu_01475 | 52551  | 48061  | 4491  | 6.93  | 99.76 |
| scaffold00774 | 8544  | 15869 | 7326  | 8.73  | C_unshiu_01475 | 44229  | 36925  | 7305  | 11.27 | 98.42 |
| scaffold00774 | 20759 | 34161 | 13403 | 15.98 | C_unshiu_01475 | 32250  | 18928  | 13323 | 20.55 | 99.22 |
| scaffold00774 | 34238 | 38145 | 3908  | 4.66  | C_unshiu_01475 | 18800  | 14916  | 3885  | 5.99  | 98.49 |

|               |       |       |       |       |                |        |        |       |       |       |
|---------------|-------|-------|-------|-------|----------------|--------|--------|-------|-------|-------|
| scaffold00774 | 40379 | 45001 | 4623  | 5.51  | C_unshiu_01475 | 11823  | 7193   | 4631  | 7.14  | 99.27 |
| scaffold00774 | 45198 | 49129 | 3932  | 4.69  | C_unshiu_01475 | 6871   | 2942   | 3930  | 6.06  | 98.7  |
| scaffold00774 | 48602 | 49759 | 1158  | 1.38  | C_unshiu_00598 | 33865  | 35024  | 1160  | 0.69  | 98.28 |
| scaffold00774 | 50497 | 52432 | 1936  | 2.31  | C_unshiu_00040 | 379035 | 377100 | 1936  | 0.29  | 100   |
| scaffold00774 | 54969 | 58184 | 3216  | 3.83  | C_unshiu_00598 | 40870  | 44054  | 3185  | 1.89  | 98.2  |
| scaffold00774 | 58185 | 59423 | 1239  | 1.48  | C_unshiu_00944 | 58038  | 59276  | 1239  | 1.11  | 100   |
| scaffold00774 | 65280 | 66398 | 1119  | 1.33  | C_unshiu_01166 | 66114  | 67232  | 1119  | 1.25  | 98.93 |
| scaffold00774 | 68016 | 73421 | 5406  | 6.44  | C_unshiu_01166 | 69215  | 74618  | 5404  | 6.06  | 99.35 |
| scaffold00774 | 74704 | 78100 | 3397  | 4.05  | C_unshiu_01166 | 76350  | 79741  | 3392  | 3.8   | 99.53 |
| scaffold00775 | 555   | 2948  | 2394  | 2.86  | C_unshiu_01390 | 15558  | 17951  | 2394  | 3.37  | 100   |
| scaffold00775 | 3199  | 4500  | 1302  | 1.55  | C_unshiu_01014 | 4373   | 5672   | 1300  | 1.24  | 99.23 |
| scaffold00775 | 10593 | 15880 | 5288  | 6.31  | C_unshiu_01014 | 11998  | 17285  | 5288  | 5.06  | 99.94 |
| scaffold00775 | 17936 | 20638 | 2703  | 3.23  | C_unshiu_01014 | 18232  | 20934  | 2703  | 2.59  | 99.3  |
| scaffold00775 | 21589 | 23412 | 1824  | 2.18  | C_unshiu_01014 | 21757  | 23580  | 1824  | 1.75  | 100   |
| scaffold00775 | 30147 | 38098 | 7952  | 9.5   | C_unshiu_01014 | 100773 | 92822  | 7952  | 7.61  | 100   |
| scaffold00775 | 38243 | 42043 | 3801  | 4.54  | C_unshiu_00794 | 34597  | 38397  | 3801  | 2.95  | 100   |
| scaffold00775 | 47871 | 55577 | 7707  | 9.2   | C_unshiu_01014 | 85963  | 78324  | 7640  | 7.32  | 99.04 |
| scaffold00775 | 59611 | 61123 | 1513  | 1.81  | C_unshiu_00794 | 47927  | 49442  | 1516  | 1.18  | 98.62 |
| scaffold00775 | 67325 | 81503 | 14179 | 16.93 | C_unshiu_00794 | 55160  | 69338  | 14179 | 11.01 | 99.87 |
| scaffold00775 | 82551 | 83748 | 1198  | 1.43  | C_unshiu_01014 | 61594  | 60397  | 1198  | 1.15  | 100   |
| scaffold00776 | 8652  | 10030 | 1379  | 1.65  | C_unshiu_00316 | 53368  | 54744  | 1377  | 0.53  | 98.98 |
| scaffold00776 | 15474 | 20000 | 4527  | 5.41  | C_unshiu_00316 | 58466  | 62987  | 4522  | 1.75  | 99.38 |
| scaffold00776 | 21764 | 26565 | 4802  | 5.74  | C_unshiu_00316 | 66041  | 70854  | 4814  | 1.86  | 98.17 |
| scaffold00776 | 31587 | 32911 | 1325  | 1.58  | C_unshiu_01949 | 3464   | 4788   | 1325  | 3.1   | 99.77 |
| scaffold00776 | 33710 | 35210 | 1501  | 1.79  | C_unshiu_00191 | 236992 | 235492 | 1501  | 0.44  | 98.47 |
| scaffold00776 | 35973 | 51059 | 15087 | 18.03 | C_unshiu_01949 | 8336   | 23394  | 15059 | 35.21 | 99.15 |
| scaffold00776 | 49739 | 51275 | 1537  | 1.84  | C_unshiu_00316 | 77649  | 79186  | 1538  | 0.6   | 99.61 |
| scaffold00776 | 57088 | 73147 | 16060 | 19.19 | C_unshiu_00316 | 84772  | 100833 | 16062 | 6.22  | 99.97 |
| scaffold00776 | 73136 | 77398 | 4263  | 5.1   | C_unshiu_00316 | 101856 | 106119 | 4264  | 1.65  | 99.81 |
| scaffold00776 | 78253 | 80562 | 2310  | 2.76  | C_unshiu_00316 | 107458 | 109767 | 2310  | 0.89  | 100   |
| scaffold00777 | 41527 | 71615 | 30089 | 36.1  | C_unshiu_00419 | 112682 | 142808 | 30127 | 13.74 | 99.59 |
| scaffold00777 | 69353 | 71643 | 2291  | 2.75  | C_unshiu_01565 | 58932  | 56643  | 2290  | 3.86  | 99    |
| scaffold00777 | 72723 | 78184 | 5462  | 6.55  | C_unshiu_00419 | 144533 | 149994 | 5462  | 2.49  | 99.96 |
| scaffold00777 | 78922 | 79998 | 1077  | 1.29  | C_unshiu_00904 | 96513  | 97591  | 1079  | 0.93  | 98.98 |
| scaffold00777 | 80001 | 82710 | 2710  | 3.25  | C_unshiu_00852 | 35982  | 33273  | 2710  | 2.21  | 100   |
| scaffold00778 | 1     | 1575  | 1575  | 1.91  | C_unshiu_00352 | 95363  | 96937  | 1575  | 0.66  | 99.11 |
| scaffold00778 | 6197  | 9542  | 3346  | 4.07  | C_unshiu_00352 | 101336 | 104678 | 3343  | 1.39  | 99.37 |
| scaffold00778 | 10135 | 11446 | 1312  | 1.59  | C_unshiu_00352 | 105797 | 107108 | 1312  | 0.55  | 100   |
| scaffold00778 | 11893 | 19630 | 7738  | 9.41  | C_unshiu_00352 | 108093 | 115834 | 7742  | 3.23  | 99.28 |
| scaffold00778 | 20085 | 21400 | 1316  | 1.6   | C_unshiu_00019 | 838636 | 839950 | 1315  | 0.16  | 98.94 |
| scaffold00778 | 21581 | 24831 | 3251  | 3.95  | C_unshiu_00352 | 118384 | 121615 | 3232  | 1.35  | 98.04 |
| scaffold00778 | 26778 | 28832 | 2055  | 2.5   | C_unshiu_00019 | 844915 | 846959 | 2045  | 0.24  | 98.98 |
| scaffold00778 | 36066 | 37230 | 1165  | 1.42  | C_unshiu_00019 | 795561 | 796723 | 1163  | 0.14  | 98.89 |
| scaffold00778 | 41959 | 50143 | 8185  | 9.95  | C_unshiu_00019 | 800977 | 809163 | 8187  | 0.97  | 99.72 |
| scaffold00778 | 51509 | 53393 | 1885  | 2.29  | C_unshiu_00019 | 811434 | 813318 | 1885  | 0.22  | 100   |
| scaffold00778 | 54982 | 64989 | 10008 | 12.17 | C_unshiu_00019 | 815298 | 825301 | 10004 | 1.18  | 99.8  |
| scaffold00778 | 65590 | 66625 | 1036  | 1.26  | C_unshiu_00352 | 178305 | 179340 | 1036  | 0.43  | 99.13 |
| scaffold00778 | 67955 | 71515 | 3561  | 4.33  | C_unshiu_00352 | 180475 | 184082 | 3608  | 1.5   | 98.31 |
| scaffold00778 | 70358 | 71515 | 1158  | 1.41  | C_unshiu_00352 | 194168 | 195326 | 1159  | 0.48  | 99.48 |
| scaffold00778 | 71990 | 74778 | 2789  | 3.39  | C_unshiu_00352 | 196005 | 198793 | 2789  | 1.16  | 99.5  |
| scaffold00778 | 74955 | 77861 | 2907  | 3.53  | C_unshiu_00352 | 199468 | 202374 | 2907  | 1.21  | 99.66 |
| scaffold00778 | 77872 | 80357 | 2486  | 3.02  | C_unshiu_00352 | 202270 | 204763 | 2494  | 1.04  | 98.8  |
| scaffold00778 | 80953 | 82264 | 1312  | 1.59  | C_unshiu_00352 | 115721 | 117016 | 1296  | 0.54  | 98.4  |
| scaffold00779 | 11841 | 15617 | 3777  | 4.6   | C_unshiu_00114 | 248323 | 252100 | 3778  | 0.87  | 99.92 |
| scaffold00779 | 17715 | 18851 | 1137  | 1.39  | C_unshiu_00114 | 255035 | 256175 | 1141  | 0.26  | 99.21 |
| scaffold00779 | 22397 | 23749 | 1353  | 1.65  | C_unshiu_00114 | 256515 | 257867 | 1353  | 0.31  | 100   |
| scaffold00779 | 63556 | 65771 | 2216  | 2.7   | C_unshiu_02909 | 15539  | 13327  | 2213  | 14.24 | 99.77 |
| scaffold00779 | 66018 | 78678 | 12661 | 15.43 | C_unshiu_02909 | 12623  | 1      | 12623 | 81.23 | 99.47 |
| scaffold00781 | 1     | 7276  | 7276  | 8.9   | C_unshiu_02065 | 9330   | 16602  | 7273  | 19.08 | 99.96 |
| scaffold00781 | 12205 | 16488 | 4284  | 5.24  | C_unshiu_01185 | 50728  | 55012  | 4285  | 4.93  | 99.98 |
| scaffold00781 | 16488 | 17688 | 1201  | 1.47  | C_unshiu_01185 | 55418  | 56618  | 1201  | 1.38  | 99.92 |
| scaffold00781 | 17688 | 19300 | 1613  | 1.97  | C_unshiu_01185 | 58309  | 56697  | 1613  | 1.85  | 99.94 |
| scaffold00781 | 19432 | 21406 | 1975  | 2.42  | C_unshiu_01185 | 58304  | 60279  | 1976  | 2.27  | 99.7  |
| scaffold00781 | 22022 | 25625 | 3604  | 4.41  | C_unshiu_01185 | 60268  | 63898  | 3631  | 4.17  | 99.17 |
| scaffold00781 | 27438 | 43843 | 16406 | 20.07 | C_unshiu_01606 | 40756  | 57188  | 16433 | 28.74 | 98.97 |
| scaffold00781 | 44620 | 59706 | 15087 | 18.45 | C_unshiu_00874 | 119983 | 104797 | 15187 | 12.66 | 98.2  |
| scaffold00782 | 17588 | 37195 | 19608 | 24    | C_unshiu_00415 | 105011 | 85402  | 19610 | 8.89  | 99.92 |
| scaffold00782 | 65401 | 76043 | 10643 | 13.03 | C_unshiu_02768 | 3894   | 14553  | 10660 | 56.87 | 99.33 |
| scaffold00782 | 77342 | 78412 | 1071  | 1.31  | C_unshiu_02768 | 15763  | 16833  | 1071  | 5.71  | 100   |
| scaffold00783 | 1     | 1854  | 1854  | 2.27  | C_unshiu_01406 | 56825  | 58678  | 1854  | 2.64  | 99.89 |
| scaffold00783 | 2610  | 3736  | 1127  | 1.38  | C_unshiu_01406 | 59679  | 60805  | 1127  | 1.61  | 100   |
| scaffold00783 | 4331  | 6034  | 1704  | 2.09  | C_unshiu_01406 | 19500  | 17800  | 1701  | 2.42  | 99.82 |
| scaffold00783 | 14775 | 16536 | 1762  | 2.16  | C_unshiu_01406 | 8997   | 7236   | 1762  | 2.51  | 100   |
| scaffold00783 | 21793 | 32340 | 10548 | 12.94 | C_unshiu_00236 | 1110   | 11707  | 10598 | 3.48  | 99.12 |
| scaffold00783 | 32968 | 43138 | 10171 | 12.47 | C_unshiu_00236 | 12754  | 22926  | 10173 | 3.34  | 99.8  |
| scaffold00783 | 43887 | 49677 | 5791  | 7.1   | C_unshiu_01399 | 25795  | 31605  | 5811  | 8.25  | 99.66 |
| scaffold00783 | 51201 | 57079 | 5879  | 7.21  | C_unshiu_00236 | 23555  | 29434  | 5880  | 1.93  | 98.49 |
| scaffold00783 | 62762 | 79629 | 16868 | 20.69 | C_unshiu_01399 | 44061  | 60928  | 16868 | 23.95 | 99.98 |
| scaffold00783 | 79757 | 81535 | 1779  | 2.18  | C_unshiu_01399 | 61774  | 63552  | 1779  | 2.53  | 100   |

|               |       |       |       |       |                |        |        |       |       |       |
|---------------|-------|-------|-------|-------|----------------|--------|--------|-------|-------|-------|
| scaffold00784 | 1     | 1810  | 1810  | 2.22  | C_unshiu_01005 | 47670  | 49476  | 1807  | 1.72  | 99.39 |
| scaffold00784 | 12519 | 37581 | 25063 | 30.75 | C_unshiu_01005 | 60881  | 85988  | 25108 | 23.87 | 98.47 |
| scaffold00784 | 38260 | 55704 | 17445 | 21.4  | C_unshiu_00059 | 566952 | 584396 | 17445 | 2.96  | 100   |
| scaffold00784 | 58505 | 59526 | 1022  | 1.25  | C_unshiu_00320 | 244968 | 243947 | 1022  | 0.4   | 99.22 |
| scaffold00784 | 65488 | 67400 | 1913  | 2.35  | C_unshiu_00320 | 237672 | 235772 | 1901  | 0.74  | 98.64 |
| scaffold00785 | 25679 | 27339 | 1661  | 2.05  | C_unshiu_00417 | 33101  | 31443  | 1659  | 0.76  | 98.44 |
| scaffold00785 | 33855 | 35244 | 1390  | 1.72  | C_unshiu_00755 | 127235 | 125845 | 1391  | 1.03  | 99.5  |
| scaffold00785 | 37972 | 39706 | 1735  | 2.14  | C_unshiu_00755 | 123181 | 121455 | 1727  | 1.28  | 98.56 |
| scaffold00785 | 74308 | 79766 | 5459  | 6.74  | C_unshiu_00309 | 204032 | 209490 | 5459  | 2.09  | 100   |
| scaffold00785 | 79897 | 80946 | 1050  | 1.3   | C_unshiu_00755 | 131854 | 130809 | 1046  | 0.77  | 99.33 |
| scaffold00786 | 1     | 10726 | 10726 | 13.25 | C_unshiu_01636 | 16890  | 27584  | 10695 | 19.23 | 99.31 |
| scaffold00786 | 14055 | 21016 | 6962  | 8.6   | C_unshiu_01636 | 35415  | 42376  | 6962  | 12.52 | 99.94 |
| scaffold00786 | 21858 | 25489 | 3632  | 4.49  | C_unshiu_01369 | 11691  | 15343  | 3653  | 5     | 98.71 |
| scaffold00786 | 30897 | 38906 | 8010  | 9.9   | C_unshiu_01369 | 25330  | 33358  | 8029  | 10.98 | 98.48 |
| scaffold00786 | 50591 | 60432 | 9842  | 12.16 | C_unshiu_01369 | 44735  | 54616  | 9882  | 13.51 | 98.66 |
| scaffold00787 | 1     | 11077 | 11077 | 13.7  | C_unshiu_01096 | 72939  | 61863  | 11077 | 11.5  | 99.85 |
| scaffold00787 | 12103 | 35770 | 23668 | 29.27 | C_unshiu_01096 | 60313  | 36571  | 23743 | 24.64 | 98.75 |
| scaffold00787 | 35860 | 37904 | 2045  | 2.53  | C_unshiu_01096 | 36441  | 34393  | 2049  | 2.13  | 99.46 |
| scaffold00787 | 37905 | 39584 | 1680  | 2.08  | C_unshiu_01064 | 30637  | 32316  | 1680  | 1.7   | 100   |
| scaffold00787 | 78133 | 80857 | 2725  | 3.37  | C_unshiu_01136 | 1      | 2725   | 2725  | 2.95  | 100   |
| scaffold00788 | 60    | 9180  | 9121  | 11.29 | C_unshiu_02868 | 11095  | 1980   | 9116  | 55.46 | 99.4  |
| scaffold00788 | 15733 | 17340 | 1608  | 1.99  | C_unshiu_01349 | 54370  | 55974  | 1605  | 2.16  | 98.82 |
| scaffold00788 | 19666 | 21126 | 1461  | 1.81  | C_unshiu_00064 | 552626 | 551166 | 1461  | 0.26  | 100   |
| scaffold00788 | 26913 | 29873 | 2961  | 3.66  | C_unshiu_00064 | 548070 | 545080 | 2991  | 0.53  | 98.4  |
| scaffold00788 | 44009 | 45221 | 1213  | 1.5   | C_unshiu_00711 | 84011  | 85223  | 1213  | 0.85  | 99.42 |
| scaffold00788 | 62696 | 63896 | 1201  | 1.49  | C_unshiu_00711 | 92796  | 93993  | 1198  | 0.84  | 98.67 |
| scaffold00789 | 6832  | 8487  | 1656  | 2.05  | C_unshiu_01164 | 22384  | 20731  | 1654  | 1.85  | 98.43 |
| scaffold00789 | 8122  | 15923 | 7802  | 9.68  | C_unshiu_00333 | 39547  | 31746  | 7802  | 3.1   | 99.99 |
| scaffold00789 | 21129 | 29563 | 8435  | 10.47 | C_unshiu_01164 | 28553  | 36988  | 8436  | 9.42  | 99.96 |
| scaffold00789 | 30874 | 32525 | 1652  | 2.05  | C_unshiu_01164 | 38565  | 40216  | 1652  | 1.84  | 100   |
| scaffold00789 | 33039 | 35710 | 2672  | 3.32  | C_unshiu_00149 | 200978 | 203643 | 2666  | 0.69  | 98.47 |
| scaffold00789 | 35770 | 47606 | 11837 | 14.69 | C_unshiu_01164 | 44200  | 56059  | 11860 | 13.24 | 99.23 |
| scaffold00789 | 50316 | 51814 | 1499  | 1.86  | C_unshiu_00197 | 103368 | 101870 | 1499  | 0.44  | 100   |
| scaffold00789 | 51974 | 55127 | 3154  | 3.91  | C_unshiu_01164 | 59671  | 62795  | 3125  | 3.49  | 98.89 |
| scaffold00789 | 55839 | 58361 | 2523  | 3.13  | C_unshiu_01164 | 63770  | 66282  | 2513  | 2.81  | 98.22 |
| scaffold00789 | 58500 | 64207 | 5708  | 7.08  | C_unshiu_00373 | 30885  | 36592  | 5708  | 2.46  | 100   |
| scaffold00789 | 64659 | 74727 | 10069 | 12.5  | C_unshiu_00373 | 37456  | 47526  | 10071 | 4.34  | 99.93 |
| scaffold00789 | 74753 | 75984 | 1232  | 1.53  | C_unshiu_00674 | 132670 | 133900 | 1231  | 0.82  | 99.76 |
| scaffold00790 | 2458  | 3570  | 1113  | 1.39  | C_unshiu_02085 | 31742  | 32856  | 1115  | 3     | 99.64 |
| scaffold00790 | 22009 | 24375 | 2367  | 2.95  | C_unshiu_00983 | 28204  | 25837  | 2368  | 2.19  | 99.96 |
| scaffold00790 | 23259 | 24382 | 1124  | 1.4   | C_unshiu_00332 | 27331  | 26208  | 1124  | 0.45  | 100   |
| scaffold00790 | 34234 | 35891 | 1658  | 2.06  | C_unshiu_00737 | 95661  | 97320  | 1660  | 1.2   | 99.88 |
| scaffold00790 | 36626 | 37705 | 1080  | 1.34  | C_unshiu_00737 | 102969 | 104050 | 1082  | 0.78  | 99.35 |
| scaffold00790 | 38499 | 42019 | 3521  | 4.38  | C_unshiu_00737 | 99506  | 103026 | 3521  | 2.55  | 99.77 |
| scaffold00790 | 43007 | 46774 | 3768  | 4.69  | C_unshiu_00737 | 104608 | 108378 | 3771  | 2.73  | 99.42 |
| scaffold00790 | 46783 | 49731 | 2949  | 3.67  | C_unshiu_00737 | 108716 | 111631 | 2916  | 2.11  | 98.14 |
| scaffold00790 | 55381 | 57160 | 1780  | 2.22  | C_unshiu_02085 | 1850   | 3630   | 1781  | 4.8   | 99.94 |
| scaffold00790 | 58222 | 69770 | 11549 | 14.38 | C_unshiu_02085 | 5192   | 16723  | 11532 | 31.05 | 99.59 |
| scaffold00790 | 70704 | 71850 | 1147  | 1.43  | C_unshiu_00737 | 92408  | 93554  | 1147  | 0.83  | 99.91 |
| scaffold00790 | 75493 | 76503 | 1011  | 1.26  | C_unshiu_02555 | 20059  | 21069  | 1011  | 4.37  | 99.7  |
| scaffold00792 | 1029  | 4819  | 3791  | 4.73  | C_unshiu_01051 | 47159  | 50966  | 3808  | 3.81  | 98.14 |
| scaffold00792 | 6805  | 8475  | 1671  | 2.09  | C_unshiu_00333 | 93441  | 95111  | 1671  | 0.66  | 100   |
| scaffold00792 | 24554 | 44463 | 19910 | 24.86 | C_unshiu_02694 | 19910  | 1      | 19910 | 99.84 | 100   |
| scaffold00792 | 48312 | 50729 | 2418  | 3.02  | C_unshiu_01271 | 79517  | 77102  | 2416  | 3.04  | 99.92 |
| scaffold00792 | 51401 | 61929 | 10529 | 13.15 | C_unshiu_01271 | 76314  | 65785  | 10530 | 13.24 | 99.98 |
| scaffold00792 | 63408 | 66104 | 2697  | 3.37  | C_unshiu_01271 | 63925  | 61229  | 2697  | 3.39  | 100   |
| scaffold00792 | 71773 | 75371 | 3599  | 4.49  | C_unshiu_00333 | 139366 | 135768 | 3599  | 1.43  | 100   |
| scaffold00794 | 3525  | 4968  | 1444  | 1.8   | C_unshiu_00233 | 300424 | 298981 | 1444  | 0.47  | 98.69 |
| scaffold00794 | 8182  | 12253 | 4072  | 5.09  | C_unshiu_03140 | 1      | 4081   | 4081  | 69.24 | 99.26 |
| scaffold00794 | 13584 | 23561 | 9978  | 12.47 | C_unshiu_00233 | 290200 | 280190 | 10011 | 3.27  | 98.18 |
| scaffold00794 | 37598 | 52243 | 14646 | 18.3  | C_unshiu_00393 | 105960 | 120596 | 14637 | 6.52  | 99.01 |
| scaffold00794 | 58982 | 75513 | 16532 | 20.65 | C_unshiu_00721 | 61505  | 44972  | 16534 | 11.7  | 99.76 |
| scaffold00794 | 77175 | 78642 | 1468  | 1.83  | C_unshiu_00721 | 43194  | 41722  | 1473  | 1.04  | 98.23 |
| scaffold00795 | 2225  | 13516 | 11292 | 14.14 | C_unshiu_02701 | 16260  | 4892   | 11369 | 57.26 | 98.91 |
| scaffold00795 | 13520 | 15134 | 1615  | 2.02  | C_unshiu_00426 | 62613  | 64227  | 1615  | 0.74  | 99.94 |
| scaffold00795 | 15256 | 19779 | 4524  | 5.67  | C_unshiu_02701 | 4525   | 1      | 4525  | 22.79 | 99.09 |
| scaffold00795 | 17694 | 23404 | 5711  | 7.15  | C_unshiu_01067 | 49759  | 44092  | 5668  | 5.73  | 98.23 |
| scaffold00795 | 26715 | 31006 | 4292  | 5.38  | C_unshiu_01067 | 41959  | 37667  | 4293  | 4.34  | 99.3  |
| scaffold00795 | 31006 | 44113 | 13108 | 16.42 | C_unshiu_01067 | 36656  | 23469  | 13188 | 13.34 | 98.21 |
| scaffold00795 | 45365 | 49747 | 4383  | 5.49  | C_unshiu_01067 | 21756  | 17370  | 4387  | 4.44  | 99.77 |
| scaffold00795 | 63747 | 64989 | 1243  | 1.56  | C_unshiu_02772 | 13762  | 12529  | 1234  | 6.66  | 98.71 |
| scaffold00795 | 64992 | 66220 | 1229  | 1.54  | C_unshiu_02772 | 11924  | 10696  | 1229  | 6.63  | 99.67 |
| scaffold00795 | 68136 | 72980 | 4845  | 6.07  | C_unshiu_02772 | 8860   | 3988   | 4873  | 26.3  | 98.97 |
| scaffold00795 | 77621 | 78828 | 1208  | 1.51  | C_unshiu_00126 | 380519 | 379312 | 1208  | 0.29  | 100   |
| scaffold00796 | 1     | 2822  | 2822  | 3.55  | C_unshiu_02174 | 27222  | 24401  | 2822  | 8.25  | 99.96 |
| scaffold00796 | 4690  | 25209 | 20520 | 25.85 | C_unshiu_02174 | 23403  | 2857   | 20547 | 60.07 | 99.28 |
| scaffold00796 | 28354 | 32565 | 4212  | 5.31  | C_unshiu_01069 | 16623  | 20834  | 4212  | 4.26  | 100   |
| scaffold00796 | 33104 | 49931 | 16828 | 21.2  | C_unshiu_01069 | 21840  | 38691  | 16852 | 17.05 | 99.34 |
| scaffold00796 | 50188 | 66841 | 16654 | 20.98 | C_unshiu_01504 | 59244  | 42582  | 16663 | 26.45 | 98.39 |

|               |       |       |       |       |                |        |        |       |       |       |
|---------------|-------|-------|-------|-------|----------------|--------|--------|-------|-------|-------|
| scaffold00796 | 66978 | 76747 | 9770  | 12.31 | C_unshiu_01504 | 30930  | 21132  | 9799  | 15.56 | 98.98 |
| scaffold00798 | 1     | 10580 | 10580 | 13.43 | C_unshiu_00157 | 81520  | 70928  | 10593 | 2.81  | 99.59 |
| scaffold00798 | 11204 | 12452 | 1249  | 1.59  | C_unshiu_00157 | 97558  | 96309  | 1250  | 0.33  | 99.44 |
| scaffold00798 | 15399 | 21578 | 6180  | 7.84  | C_unshiu_00157 | 71010  | 64810  | 6201  | 1.65  | 98.9  |
| scaffold00798 | 24815 | 26364 | 1550  | 1.97  | C_unshiu_00157 | 61374  | 59833  | 1542  | 0.41  | 99.1  |
| scaffold00798 | 57104 | 66827 | 9724  | 12.34 | C_unshiu_00157 | 121027 | 130750 | 9724  | 2.58  | 100   |
| scaffold00798 | 66820 | 70510 | 3691  | 4.68  | C_unshiu_00732 | 75245  | 78935  | 3691  | 2.66  | 100   |
| scaffold00798 | 70822 | 72058 | 1237  | 1.57  | C_unshiu_00157 | 134076 | 135313 | 1238  | 0.33  | 99.52 |
| scaffold00799 | 9921  | 12113 | 2193  | 2.79  | C_unshiu_00456 | 174368 | 172176 | 2193  | 1.07  | 100   |
| scaffold00799 | 15958 | 52474 | 36517 | 46.39 | C_unshiu_00456 | 165669 | 129162 | 36508 | 17.78 | 99.96 |
| scaffold00799 | 52680 | 55001 | 2322  | 2.95  | C_unshiu_00988 | 83552  | 85873  | 2322  | 2.15  | 100   |
| scaffold00799 | 57563 | 60580 | 3018  | 3.83  | C_unshiu_00456 | 124493 | 121482 | 3012  | 1.47  | 99.54 |
| scaffold00799 | 61672 | 77480 | 15809 | 20.08 | C_unshiu_00456 | 119991 | 104182 | 15810 | 7.7   | 99.97 |
| scaffold00800 | 6157  | 8419  | 2263  | 2.88  | C_unshiu_01671 | 1      | 2263   | 2263  | 4.18  | 100   |
| scaffold00800 | 9625  | 11444 | 1820  | 2.31  | C_unshiu_01671 | 3976   | 5794   | 1819  | 3.36  | 99.95 |
| scaffold00800 | 11958 | 14357 | 2400  | 3.05  | C_unshiu_01671 | 6600   | 9003   | 2404  | 4.44  | 99.75 |
| scaffold00800 | 14350 | 48684 | 34335 | 43.66 | C_unshiu_01671 | 9061   | 43394  | 34334 | 63.47 | 99.89 |
| scaffold00800 | 53696 | 58299 | 4604  | 5.85  | C_unshiu_01671 | 47506  | 52109  | 4604  | 8.51  | 99.74 |
| scaffold00800 | 64408 | 65620 | 1213  | 1.54  | C_unshiu_01124 | 37269  | 36057  | 1213  | 1.3   | 100   |
| scaffold00800 | 65611 | 73376 | 7766  | 9.87  | C_unshiu_00408 | 74434  | 82161  | 7728  | 3.49  | 99.22 |
| scaffold00800 | 73413 | 76508 | 3096  | 3.94  | C_unshiu_00408 | 82412  | 85507  | 3096  | 1.4   | 99.97 |
| scaffold00801 | 1     | 5227  | 5227  | 6.66  | C_unshiu_00261 | 174417 | 169191 | 5227  | 1.83  | 100   |
| scaffold00801 | 6273  | 8166  | 1894  | 2.41  | C_unshiu_00261 | 166372 | 164479 | 1894  | 0.66  | 99.74 |
| scaffold00801 | 8162  | 16760 | 8599  | 10.95 | C_unshiu_00261 | 164412 | 155821 | 8592  | 3     | 98.96 |
| scaffold00801 | 22690 | 25422 | 2733  | 3.48  | C_unshiu_02465 | 3181   | 5876   | 2696  | 10.49 | 98.32 |
| scaffold00801 | 26599 | 43425 | 16827 | 21.42 | C_unshiu_02465 | 7364   | 24190  | 16827 | 65.48 | 99.94 |
| scaffold00801 | 48571 | 53314 | 4744  | 6.04  | C_unshiu_01397 | 59317  | 64085  | 4769  | 6.76  | 98.32 |
| scaffold00801 | 50560 | 69942 | 19383 | 24.68 | C_unshiu_00655 | 3414   | 22793  | 19380 | 12.52 | 99.56 |
| scaffold00801 | 70460 | 72230 | 1771  | 2.25  | C_unshiu_00655 | 23107  | 24877  | 1771  | 1.14  | 99.77 |
| scaffold00801 | 72776 | 78333 | 5558  | 7.08  | C_unshiu_00104 | 37048  | 42599  | 5552  | 1.23  | 98.05 |
| scaffold00802 | 1195  | 5775  | 4581  | 5.84  | C_unshiu_00309 | 230236 | 225656 | 4581  | 1.76  | 100   |
| scaffold00802 | 7896  | 24367 | 16472 | 20.99 | C_unshiu_00811 | 9815   | 26265  | 16451 | 12.92 | 99.49 |
| scaffold00802 | 26450 | 28432 | 1983  | 2.53  | C_unshiu_00373 | 52473  | 54455  | 1983  | 0.85  | 99.95 |
| scaffold00802 | 29003 | 40273 | 11271 | 14.36 | C_unshiu_00373 | 55305  | 66575  | 11271 | 4.86  | 99.99 |
| scaffold00802 | 43204 | 59469 | 16266 | 20.73 | C_unshiu_00373 | 71287  | 87569  | 16283 | 7.02  | 99.77 |
| scaffold00802 | 73022 | 77555 | 4534  | 5.78  | C_unshiu_00811 | 47091  | 51657  | 4567  | 3.59  | 99.21 |
| scaffold00803 | 2367  | 3412  | 1046  | 1.34  | C_unshiu_01838 | 15918  | 14873  | 1046  | 2.23  | 99.52 |
| scaffold00803 | 3409  | 6673  | 3265  | 4.17  | C_unshiu_00413 | 163380 | 160111 | 3270  | 1.48  | 99.42 |
| scaffold00803 | 14108 | 19327 | 5220  | 6.67  | C_unshiu_01166 | 18881  | 24102  | 5222  | 5.85  | 99.43 |
| scaffold00803 | 25516 | 27148 | 1633  | 2.09  | C_unshiu_00930 | 1      | 1633   | 1633  | 1.44  | 100   |
| scaffold00803 | 30448 | 36175 | 5728  | 7.31  | C_unshiu_00930 | 4150   | 9883   | 5734  | 5.05  | 98.15 |
| scaffold00803 | 57569 | 61295 | 3727  | 4.76  | C_unshiu_00930 | 14622  | 18332  | 3711  | 3.27  | 98.77 |
| scaffold00803 | 61673 | 65070 | 3398  | 4.34  | C_unshiu_00930 | 18805  | 22204  | 3400  | 2.99  | 98.59 |
| scaffold00803 | 68352 | 72666 | 4315  | 5.51  | C_unshiu_00930 | 29915  | 34236  | 4322  | 3.8   | 99.12 |
| scaffold00804 | 2889  | 4457  | 1569  | 2     | C_unshiu_00336 | 164297 | 165865 | 1569  | 0.63  | 100   |
| scaffold00804 | 18363 | 19748 | 1386  | 1.77  | C_unshiu_00988 | 44963  | 46351  | 1389  | 1.29  | 99.42 |
| scaffold00804 | 21208 | 51161 | 29954 | 38.25 | C_unshiu_01704 | 29945  | 1      | 29945 | 57.32 | 99.68 |
| scaffold00804 | 48984 | 51241 | 2258  | 2.88  | C_unshiu_00988 | 18008  | 15747  | 2262  | 2.1   | 98.23 |
| scaffold00804 | 52857 | 55213 | 2357  | 3.01  | C_unshiu_00988 | 15567  | 13217  | 2351  | 2.18  | 98.64 |
| scaffold00804 | 60171 | 61206 | 1036  | 1.32  | C_unshiu_00413 | 100447 | 101482 | 1036  | 0.47  | 100   |
| scaffold00804 | 61209 | 62460 | 1252  | 1.6   | C_unshiu_00988 | 7886   | 6635   | 1252  | 1.16  | 99.52 |
| scaffold00804 | 63385 | 74265 | 10881 | 13.89 | C_unshiu_00780 | 3902   | 14711  | 10810 | 8.24  | 98.04 |
| scaffold00804 | 74264 | 77436 | 3173  | 4.05  | C_unshiu_00780 | 14644  | 17811  | 3168  | 2.42  | 99.84 |
| scaffold00805 | 1     | 3594  | 3594  | 4.6   | C_unshiu_01416 | 69732  | 66157  | 3576  | 5.12  | 98.78 |
| scaffold00805 | 6734  | 9627  | 2894  | 3.71  | C_unshiu_01416 | 32542  | 29649  | 2894  | 4.15  | 99.59 |
| scaffold00805 | 10547 | 11616 | 1070  | 1.37  | C_unshiu_01416 | 53841  | 54910  | 1070  | 1.53  | 99.53 |
| scaffold00805 | 20158 | 21487 | 1330  | 1.7   | C_unshiu_01416 | 44871  | 43542  | 1330  | 1.91  | 99.4  |
| scaffold00805 | 21488 | 22617 | 1130  | 1.45  | C_unshiu_01923 | 15363  | 16492  | 1130  | 2.57  | 100   |
| scaffold00805 | 22701 | 24378 | 1678  | 2.15  | C_unshiu_01416 | 41467  | 39794  | 1674  | 2.4   | 99.4  |
| scaffold00805 | 24796 | 26106 | 1311  | 1.68  | C_unshiu_01416 | 37216  | 35889  | 1328  | 1.9   | 98.64 |
| scaffold00805 | 31473 | 52000 | 20528 | 26.28 | C_unshiu_01966 | 40087  | 19560  | 20528 | 48.99 | 99.99 |
| scaffold00805 | 57629 | 59754 | 2126  | 2.72  | C_unshiu_01966 | 14799  | 12674  | 2126  | 5.07  | 100   |
| scaffold00805 | 62855 | 69010 | 6156  | 7.88  | C_unshiu_01966 | 12101  | 5946   | 6156  | 14.69 | 99.85 |
| scaffold00805 | 70275 | 72309 | 2035  | 2.61  | C_unshiu_01966 | 4288   | 2254   | 2035  | 4.86  | 99.07 |
| scaffold00807 | 6912  | 22983 | 16072 | 20.83 | C_unshiu_00095 | 11200  | 27270  | 16071 | 3.46  | 99.85 |
| scaffold00807 | 23816 | 29353 | 5538  | 7.18  | C_unshiu_00095 | 28566  | 34057  | 5492  | 1.18  | 98.22 |
| scaffold00807 | 29365 | 30400 | 1036  | 1.34  | C_unshiu_00095 | 34463  | 35499  | 1037  | 0.22  | 99.9  |
| scaffold00807 | 39833 | 42358 | 2526  | 3.27  | C_unshiu_00095 | 62170  | 64727  | 2558  | 0.55  | 98.55 |
| scaffold00807 | 62572 | 64315 | 1744  | 2.26  | C_unshiu_01821 | 42201  | 43947  | 1747  | 3.66  | 99.54 |
| scaffold00808 | 35011 | 43701 | 8691  | 11.3  | C_unshiu_01290 | 42437  | 33819  | 8619  | 11.02 | 98.97 |
| scaffold00808 | 47166 | 48660 | 1495  | 1.94  | C_unshiu_01290 | 31507  | 30013  | 1495  | 1.91  | 100   |
| scaffold00808 | 49849 | 58330 | 8482  | 11.03 | C_unshiu_01290 | 28471  | 19948  | 8524  | 10.9  | 98.36 |
| scaffold00809 | 1     | 1043  | 1043  | 1.36  | C_unshiu_01821 | 3683   | 4726   | 1044  | 2.19  | 99.9  |
| scaffold00809 | 1961  | 6374  | 4414  | 5.74  | C_unshiu_01821 | 6147   | 10560  | 4414  | 9.25  | 100   |
| scaffold00809 | 11589 | 14845 | 3257  | 4.24  | C_unshiu_01821 | 14828  | 18084  | 3257  | 6.82  | 100   |
| scaffold00809 | 15710 | 20331 | 4622  | 6.01  | C_unshiu_01821 | 19470  | 24091  | 4622  | 9.68  | 99.96 |
| scaffold00809 | 22116 | 27874 | 5759  | 7.49  | C_unshiu_01821 | 26616  | 32374  | 5759  | 12.06 | 99.86 |
| scaffold00809 | 28321 | 29620 | 1300  | 1.69  | C_unshiu_01821 | 33206  | 34505  | 1300  | 2.72  | 100   |
| scaffold00809 | 34113 | 35358 | 1246  | 1.62  | C_unshiu_01947 | 6241   | 7485   | 1245  | 2.9   | 99.92 |

|               |       |       |       |       |                |        |        |       |       |       |
|---------------|-------|-------|-------|-------|----------------|--------|--------|-------|-------|-------|
| scaffold00809 | 40193 | 42080 | 1888  | 2.46  | C_unshiu_01947 | 13155  | 15042  | 1888  | 4.4   | 99.74 |
| scaffold00809 | 42147 | 59562 | 17416 | 22.65 | C_unshiu_01947 | 15356  | 32702  | 17347 | 40.46 | 99.39 |
| scaffold00809 | 71282 | 72764 | 1483  | 1.93  | C_unshiu_01265 | 50062  | 48581  | 1482  | 1.86  | 99.93 |
| scaffold00810 | 3053  | 18220 | 15168 | 19.73 | C_unshiu_00151 | 272287 | 287368 | 15082 | 3.91  | 98.69 |
| scaffold00810 | 16058 | 32005 | 15948 | 20.74 | C_unshiu_02173 | 8112   | 24037  | 15926 | 46.52 | 98.57 |
| scaffold00810 | 30848 | 42727 | 11880 | 15.45 | C_unshiu_00269 | 41054  | 29213  | 11842 | 4.2   | 98.24 |
| scaffold00810 | 43778 | 45175 | 1398  | 1.82  | C_unshiu_00415 | 35031  | 36430  | 1400  | 0.63  | 98.79 |
| scaffold00810 | 47859 | 53557 | 5699  | 7.41  | C_unshiu_00415 | 38913  | 44611  | 5699  | 2.58  | 99.28 |
| scaffold00810 | 56347 | 62730 | 6384  | 8.3   | C_unshiu_00415 | 46141  | 52525  | 6385  | 2.9   | 99.97 |
| scaffold00810 | 63093 | 64592 | 1500  | 1.95  | C_unshiu_00415 | 52877  | 54377  | 1501  | 0.68  | 99.67 |
| scaffold00810 | 65433 | 66541 | 1109  | 1.44  | C_unshiu_00415 | 55468  | 56576  | 1109  | 0.5   | 100   |
| scaffold00810 | 67333 | 68443 | 1111  | 1.44  | C_unshiu_00415 | 57246  | 58356  | 1111  | 0.5   | 99.91 |
| scaffold00810 | 74433 | 76888 | 2456  | 3.19  | C_unshiu_02076 | 10617  | 8158   | 2460  | 6.57  | 98.99 |
| scaffold00811 | 842   | 4387  | 3546  | 4.63  | C_unshiu_01465 | 26106  | 29651  | 3546  | 5.41  | 100   |
| scaffold00811 | 5309  | 10396 | 5088  | 6.64  | C_unshiu_01465 | 30963  | 36047  | 5085  | 7.75  | 99.59 |
| scaffold00811 | 10537 | 39613 | 29077 | 37.95 | C_unshiu_01465 | 36510  | 65579  | 29070 | 44.33 | 99.95 |
| scaffold00811 | 45085 | 58117 | 13033 | 17.01 | C_unshiu_01506 | 62945  | 49948  | 12998 | 20.65 | 99.71 |
| scaffold00811 | 59099 | 61643 | 2545  | 3.32  | C_unshiu_01506 | 48732  | 46216  | 2517  | 4     | 98.82 |
| scaffold00811 | 62790 | 66539 | 3750  | 4.89  | C_unshiu_02142 | 33544  | 29795  | 3750  | 10.63 | 100   |
| scaffold00811 | 67232 | 76624 | 9393  | 12.26 | C_unshiu_02142 | 28872  | 19516  | 9357  | 26.51 | 99.55 |
| scaffold00812 | 4256  | 5586  | 1331  | 1.74  | C_unshiu_01111 | 18066  | 16735  | 1332  | 1.41  | 99.25 |
| scaffold00812 | 39181 | 41183 | 2003  | 2.62  | C_unshiu_01979 | 1      | 2009   | 2009  | 4.87  | 99.55 |
| scaffold00812 | 41511 | 46669 | 5159  | 6.76  | C_unshiu_01979 | 2376   | 7546   | 5171  | 12.53 | 99.63 |
| scaffold00812 | 48143 | 56954 | 8812  | 11.54 | C_unshiu_01111 | 36349  | 27519  | 8831  | 9.32  | 99.29 |
| scaffold00812 | 61195 | 62706 | 1512  | 1.98  | C_unshiu_00741 | 69335  | 67821  | 1515  | 1.1   | 99.74 |
| scaffold00813 | 10637 | 13189 | 2553  | 3.37  | C_unshiu_02965 | 13993  | 11478  | 2516  | 17.98 | 98.12 |
| scaffold00813 | 13668 | 15615 | 1948  | 2.58  | C_unshiu_02965 | 10871  | 8928   | 1944  | 13.89 | 98.21 |
| scaffold00813 | 17506 | 22339 | 4834  | 6.39  | C_unshiu_02965 | 6913   | 2080   | 4834  | 34.55 | 100   |
| scaffold00813 | 24225 | 25715 | 1491  | 1.97  | C_unshiu_00123 | 386929 | 388419 | 1491  | 0.35  | 100   |
| scaffold00813 | 26986 | 29891 | 2906  | 3.84  | C_unshiu_01594 | 30246  | 27342  | 2905  | 5.03  | 99.93 |
| scaffold00813 | 39709 | 42652 | 2944  | 3.89  | C_unshiu_00140 | 65847  | 62904  | 2944  | 0.73  | 100   |
| scaffold00813 | 49558 | 52983 | 3426  | 4.53  | C_unshiu_01684 | 6721   | 10145  | 3425  | 6.43  | 99.97 |
| scaffold00813 | 52388 | 67832 | 15445 | 20.42 | C_unshiu_01684 | 10182  | 25675  | 15494 | 29.07 | 99.12 |
| scaffold00813 | 66647 | 75648 | 9002  | 11.9  | C_unshiu_01684 | 28080  | 37081  | 9002  | 16.89 | 99.9  |
| scaffold00814 | 2907  | 11701 | 8795  | 11.63 | C_unshiu_01595 | 54251  | 45496  | 8756  | 15.18 | 98.23 |
| scaffold00814 | 16911 | 18461 | 1551  | 2.05  | C_unshiu_00053 | 64965  | 66515  | 1551  | 0.26  | 99.94 |
| scaffold00814 | 18475 | 42624 | 24150 | 31.94 | C_unshiu_01620 | 32449  | 56585  | 24137 | 42.66 | 99.88 |
| scaffold00814 | 44049 | 46285 | 2237  | 2.96  | C_unshiu_02050 | 29302  | 31538  | 2237  | 5.79  | 100   |
| scaffold00814 | 53796 | 57085 | 3290  | 4.35  | C_unshiu_02050 | 32445  | 35738  | 3294  | 8.52  | 99.61 |
| scaffold00814 | 66389 | 68750 | 2362  | 3.12  | C_unshiu_01149 | 48435  | 50796  | 2362  | 2.6   | 98.77 |
| scaffold00815 | 15    | 54331 | 54317 | 71.82 | C_unshiu_01188 | 78630  | 24314  | 54317 | 62.72 | 99.99 |
| scaffold00816 | 3455  | 4511  | 1057  | 1.4   | C_unshiu_01779 | 41799  | 40743  | 1057  | 2.14  | 100   |
| scaffold00816 | 10937 | 12204 | 1268  | 1.68  | C_unshiu_01779 | 35807  | 34540  | 1268  | 2.57  | 100   |
| scaffold00816 | 13800 | 21604 | 7805  | 10.35 | C_unshiu_01779 | 32582  | 24790  | 7793  | 15.8  | 99.68 |
| scaffold00816 | 23312 | 25198 | 1887  | 2.5   | C_unshiu_01779 | 22856  | 20970  | 1887  | 3.83  | 99.95 |
| scaffold00816 | 27626 | 29601 | 1976  | 2.62  | C_unshiu_01779 | 20163  | 18188  | 1976  | 4.01  | 99.95 |
| scaffold00816 | 34645 | 36168 | 1524  | 2.02  | C_unshiu_01010 | 24567  | 23044  | 1524  | 1.45  | 100   |
| scaffold00816 | 36169 | 39554 | 3386  | 4.49  | C_unshiu_01779 | 10121  | 6736   | 3386  | 6.87  | 99.82 |
| scaffold00818 | 7343  | 14542 | 7200  | 9.58  | C_unshiu_01907 | 10142  | 17329  | 7188  | 16.21 | 98.86 |
| scaffold00818 | 13521 | 27758 | 14238 | 18.95 | C_unshiu_01907 | 16463  | 30758  | 14296 | 32.25 | 98.5  |
| scaffold00818 | 30007 | 33414 | 3408  | 4.53  | C_unshiu_01907 | 32092  | 35482  | 3391  | 7.65  | 99.5  |
| scaffold00818 | 40340 | 41925 | 1586  | 2.11  | C_unshiu_00198 | 308901 | 307316 | 1586  | 0.47  | 98.36 |
| scaffold00818 | 42320 | 46846 | 4527  | 6.02  | C_unshiu_00280 | 73863  | 78389  | 4527  | 1.64  | 100   |
| scaffold00818 | 47653 | 75153 | 27501 | 36.59 | C_unshiu_00280 | 79509  | 106998 | 27490 | 9.93  | 99.51 |
| scaffold00819 | 721   | 2056  | 1336  | 1.78  | C_unshiu_01038 | 54124  | 55462  | 1339  | 1.3   | 99.18 |
| scaffold00819 | 5106  | 8664  | 3559  | 4.75  | C_unshiu_01895 | 6395   | 9953   | 3559  | 7.92  | 100   |
| scaffold00819 | 41437 | 43259 | 1823  | 2.43  | C_unshiu_01895 | 20854  | 19037  | 1818  | 4.05  | 99.07 |
| scaffold00819 | 53841 | 55836 | 1996  | 2.66  | C_unshiu_01895 | 23417  | 21422  | 1996  | 4.44  | 99.75 |
| scaffold00819 | 56799 | 60360 | 3562  | 4.75  | C_unshiu_01895 | 14614  | 18174  | 3561  | 7.93  | 99.97 |
| scaffold00821 | 1     | 3164  | 3164  | 4.25  | C_unshiu_00100 | 48293  | 45129  | 3165  | 0.69  | 99.43 |
| scaffold00821 | 3164  | 10568 | 7405  | 9.95  | C_unshiu_00100 | 44228  | 36734  | 7495  | 1.64  | 98.41 |
| scaffold00821 | 25248 | 46301 | 21054 | 28.29 | C_unshiu_01238 | 1      | 21023  | 21023 | 25.71 | 99.43 |
| scaffold00821 | 49874 | 51743 | 1870  | 2.51  | C_unshiu_00100 | 2269   | 400    | 1870  | 0.41  | 99.57 |
| scaffold00821 | 51929 | 54266 | 2338  | 3.14  | C_unshiu_00511 | 101113 | 98776  | 2338  | 1.24  | 100   |
| scaffold00821 | 58917 | 60265 | 1349  | 1.81  | C_unshiu_01238 | 49839  | 51189  | 1351  | 1.65  | 99.63 |
| scaffold00821 | 61936 | 73949 | 12014 | 16.14 | C_unshiu_01238 | 51177  | 63194  | 12018 | 14.7  | 99.73 |
| scaffold00822 | 6484  | 8216  | 1733  | 2.33  | C_unshiu_00988 | 1734   | 1      | 1734  | 1.61  | 98.85 |
| scaffold00822 | 6792  | 8509  | 1718  | 2.31  | C_unshiu_02075 | 1      | 1717   | 1717  | 4.57  | 98.95 |
| scaffold00822 | 12821 | 15041 | 2221  | 2.99  | C_unshiu_02075 | 5068   | 7292   | 2225  | 5.92  | 99.82 |
| scaffold00822 | 15292 | 16787 | 1496  | 2.01  | C_unshiu_01506 | 44125  | 42646  | 1480  | 2.35  | 98.53 |
| scaffold00822 | 17014 | 19936 | 2923  | 3.93  | C_unshiu_02075 | 9990   | 12912  | 2923  | 7.78  | 99.83 |
| scaffold00822 | 20623 | 22754 | 2132  | 2.87  | C_unshiu_01506 | 39694  | 37569  | 2126  | 3.38  | 99.58 |
| scaffold00822 | 24515 | 47724 | 23210 | 31.23 | C_unshiu_01506 | 34141  | 10964  | 23178 | 36.82 | 98.62 |
| scaffold00822 | 47748 | 49176 | 1429  | 1.92  | C_unshiu_01506 | 10680  | 9252   | 1429  | 2.27  | 99.79 |
| scaffold00822 | 56848 | 58031 | 1184  | 1.59  | C_unshiu_01506 | 1184   | 1      | 1184  | 1.88  | 99.92 |
| scaffold00824 | 8896  | 9899  | 1004  | 1.35  | C_unshiu_00836 | 93920  | 92911  | 1010  | 0.81  | 98.51 |
| scaffold00824 | 12674 | 17705 | 5032  | 6.79  | C_unshiu_00836 | 92438  | 87400  | 5039  | 4.06  | 99.27 |
| scaffold00824 | 51257 | 74153 | 22897 | 30.88 | C_unshiu_00836 | 56963  | 34138  | 22826 | 18.38 | 99.3  |
| scaffold00825 | 1952  | 9711  | 7760  | 10.55 | C_unshiu_01363 | 33136  | 40894  | 7759  | 10.57 | 99.97 |

|               |       |       |       |       |                |        |        |       |       |       |
|---------------|-------|-------|-------|-------|----------------|--------|--------|-------|-------|-------|
| scaffold00825 | 10583 | 12700 | 2118  | 2.88  | C_unshiu_01363 | 42267  | 44384  | 2118  | 2.89  | 100   |
| scaffold00825 | 13028 | 14472 | 1445  | 1.96  | C_unshiu_01363 | 44909  | 46353  | 1445  | 1.97  | 99.79 |
| scaffold00825 | 24488 | 26078 | 1591  | 2.16  | C_unshiu_01363 | 62578  | 64186  | 1609  | 2.19  | 98.63 |
| scaffold00825 | 27723 | 29674 | 1952  | 2.65  | C_unshiu_01363 | 65827  | 67778  | 1952  | 2.66  | 100   |
| scaffold00825 | 29700 | 30849 | 1150  | 1.56  | C_unshiu_02912 | 5280   | 4131   | 1150  | 7.41  | 100   |
| scaffold00825 | 33939 | 36399 | 2461  | 3.35  | C_unshiu_01363 | 67389  | 69852  | 2464  | 3.36  | 98.99 |
| scaffold00825 | 46448 | 49278 | 2831  | 3.85  | C_unshiu_01780 | 1      | 2830   | 2830  | 5.75  | 99.82 |
| scaffold00825 | 49279 | 50669 | 1391  | 1.89  | C_unshiu_00837 | 36591  | 35201  | 1391  | 1.12  | 100   |
| scaffold00825 | 50670 | 54664 | 3995  | 5.43  | C_unshiu_02479 | 19903  | 15905  | 3999  | 15.82 | 99.6  |
| scaffold00825 | 54767 | 66026 | 11260 | 15.3  | C_unshiu_02479 | 15350  | 4005   | 11346 | 44.89 | 98.2  |
| scaffold00825 | 70062 | 72220 | 2159  | 2.93  | C_unshiu_02479 | 25275  | 23117  | 2159  | 8.54  | 100   |
| scaffold00826 | 1555  | 11385 | 9831  | 13.37 | C_unshiu_00174 | 236069 | 226239 | 9831  | 2.7   | 100   |
| scaffold00826 | 15021 | 33481 | 18461 | 25.1  | C_unshiu_00174 | 218829 | 200369 | 18461 | 5.07  | 100   |
| scaffold00826 | 33500 | 59260 | 25761 | 35.02 | C_unshiu_00174 | 200261 | 174499 | 25763 | 7.08  | 99.95 |
| scaffold00826 | 59776 | 65293 | 5518  | 7.5   | C_unshiu_00174 | 173632 | 168106 | 5527  | 1.52  | 99.13 |
| scaffold00827 | 1017  | 2167  | 1151  | 1.57  | C_unshiu_01037 | 101488 | 102638 | 1151  | 1.12  | 99.31 |
| scaffold00827 | 5941  | 7398  | 1458  | 1.99  | C_unshiu_01127 | 65582  | 64126  | 1457  | 1.57  | 98.97 |
| scaffold00827 | 7520  | 9531  | 2012  | 2.75  | C_unshiu_01306 | 7407   | 9418   | 2012  | 2.62  | 100   |
| scaffold00827 | 10220 | 17508 | 7289  | 9.95  | C_unshiu_01306 | 10451  | 17739  | 7289  | 9.51  | 99.99 |
| scaffold00827 | 21844 | 24035 | 2192  | 2.99  | C_unshiu_01306 | 21191  | 23370  | 2180  | 2.84  | 98.73 |
| scaffold00827 | 24048 | 26302 | 2255  | 3.08  | C_unshiu_01306 | 18940  | 21194  | 2255  | 2.94  | 100   |
| scaffold00827 | 29758 | 32643 | 2886  | 3.94  | C_unshiu_01306 | 28056  | 30941  | 2886  | 3.76  | 99.86 |
| scaffold00827 | 32749 | 46528 | 13780 | 18.81 | C_unshiu_01306 | 31251  | 45032  | 13782 | 17.98 | 99.92 |
| scaffold00827 | 47137 | 56648 | 9512  | 12.98 | C_unshiu_01306 | 46236  | 55779  | 9544  | 12.45 | 98.72 |
| scaffold00827 | 69286 | 71368 | 2083  | 2.84  | C_unshiu_01408 | 3130   | 5250   | 2121  | 3.02  | 98.16 |
| scaffold00829 | 1     | 17681 | 17681 | 24.42 | C_unshiu_00931 | 80305  | 62628  | 17678 | 15.56 | 99.76 |
| scaffold00829 | 23893 | 36085 | 12193 | 16.84 | C_unshiu_00931 | 56752  | 44552  | 12201 | 10.74 | 99.55 |
| scaffold00829 | 36181 | 44391 | 8211  | 11.34 | C_unshiu_00931 | 44398  | 36185  | 8214  | 7.23  | 99.88 |
| scaffold00829 | 44475 | 51155 | 6681  | 9.23  | C_unshiu_00931 | 35810  | 29129  | 6682  | 5.88  | 99.96 |
| scaffold00829 | 52796 | 56558 | 3763  | 5.2   | C_unshiu_00931 | 26980  | 23244  | 3737  | 3.29  | 98.81 |
| scaffold00829 | 59984 | 69653 | 9670  | 13.36 | C_unshiu_00931 | 99407  | 89742  | 9666  | 8.51  | 99.59 |
| scaffold00830 | 8059  | 12056 | 3998  | 5.53  | C_unshiu_00585 | 138629 | 134633 | 3997  | 2.34  | 99.95 |
| scaffold00830 | 16801 | 18298 | 1498  | 2.07  | C_unshiu_00585 | 130849 | 129352 | 1498  | 0.88  | 98.87 |
| scaffold00830 | 18466 | 23459 | 4994  | 6.9   | C_unshiu_00585 | 128713 | 123719 | 4995  | 2.93  | 99.96 |
| scaffold00830 | 23943 | 25380 | 1438  | 1.99  | C_unshiu_00585 | 115753 | 114323 | 1431  | 0.84  | 98.06 |
| scaffold00830 | 31218 | 43719 | 12502 | 17.28 | C_unshiu_00585 | 113652 | 101158 | 12495 | 7.33  | 99.19 |
| scaffold00830 | 44056 | 46333 | 2278  | 3.15  | C_unshiu_00585 | 100632 | 98355  | 2278  | 1.34  | 99.96 |
| scaffold00830 | 51927 | 56467 | 4541  | 6.28  | C_unshiu_00585 | 93371  | 88831  | 4541  | 2.66  | 99.96 |
| scaffold00830 | 57716 | 64794 | 7079  | 9.78  | C_unshiu_00585 | 87081  | 80000  | 7082  | 4.15  | 99.76 |
| scaffold00831 | 563   | 1753  | 1191  | 1.66  | C_unshiu_02335 | 19341  | 20531  | 1191  | 4.14  | 98.74 |
| scaffold00831 | 603   | 1755  | 1153  | 1.6   | C_unshiu_00277 | 5179   | 6332   | 1154  | 0.41  | 98.7  |
| scaffold00831 | 1765  | 2945  | 1181  | 1.64  | C_unshiu_00277 | 85828  | 87008  | 1181  | 0.42  | 99.07 |
| scaffold00831 | 11290 | 33587 | 22298 | 31.01 | C_unshiu_00277 | 11900  | 34196  | 22297 | 8.01  | 98.91 |
| scaffold00831 | 33893 | 35046 | 1154  | 1.6   | C_unshiu_00277 | 35448  | 36592  | 1145  | 0.41  | 99.13 |
| scaffold00831 | 35756 | 41640 | 5885  | 8.18  | C_unshiu_00277 | 36583  | 42470  | 5888  | 2.12  | 99.64 |
| scaffold00831 | 44089 | 45765 | 1677  | 2.33  | C_unshiu_00277 | 60219  | 61900  | 1682  | 0.6   | 99.7  |
| scaffold00831 | 48001 | 54388 | 6388  | 8.88  | C_unshiu_00277 | 45369  | 51756  | 6388  | 2.3   | 99.97 |
| scaffold00831 | 54596 | 66284 | 11689 | 16.25 | C_unshiu_02583 | 15616  | 3843   | 11774 | 52.33 | 98.79 |
| scaffold00833 | 10429 | 12112 | 1684  | 2.34  | C_unshiu_00417 | 205036 | 203354 | 1683  | 0.77  | 99.11 |
| scaffold00833 | 12954 | 17099 | 4146  | 5.77  | C_unshiu_01499 | 23104  | 27249  | 4146  | 6.55  | 100   |
| scaffold00833 | 17094 | 24086 | 6993  | 9.73  | C_unshiu_00417 | 199002 | 192010 | 6993  | 3.19  | 99.97 |
| scaffold00833 | 24153 | 26544 | 2392  | 3.33  | C_unshiu_00417 | 191894 | 189502 | 2393  | 1.09  | 99.79 |
| scaffold00833 | 27663 | 29046 | 1384  | 1.93  | C_unshiu_00417 | 188102 | 186718 | 1385  | 0.63  | 99.78 |
| scaffold00833 | 29114 | 32097 | 2984  | 4.15  | C_unshiu_00189 | 59283  | 56284  | 3000  | 0.87  | 98.9  |
| scaffold00833 | 37154 | 39125 | 1972  | 2.74  | C_unshiu_00189 | 47201  | 49172  | 1972  | 0.57  | 100   |
| scaffold00833 | 40220 | 51663 | 11444 | 15.92 | C_unshiu_00417 | 177909 | 166432 | 11478 | 5.23  | 98.47 |
| scaffold00833 | 58945 | 71866 | 12922 | 17.98 | C_unshiu_00417 | 158049 | 145127 | 12923 | 5.89  | 99.99 |
| scaffold00834 | 36121 | 63991 | 27871 | 38.78 | C_unshiu_01419 | 37575  | 65434  | 27860 | 40.08 | 99.16 |
| scaffold00834 | 64134 | 66254 | 2121  | 2.95  | C_unshiu_01419 | 65889  | 68009  | 2121  | 3.05  | 100   |
| scaffold00834 | 66569 | 67634 | 1066  | 1.48  | C_unshiu_01419 | 68447  | 69512  | 1066  | 1.53  | 100   |
| scaffold00835 | 13960 | 18954 | 4995  | 6.95  | C_unshiu_01556 | 1774   | 6767   | 4994  | 8.32  | 99.9  |
| scaffold00835 | 22437 | 27727 | 5291  | 7.36  | C_unshiu_01556 | 9539   | 14829  | 5291  | 8.81  | 100   |
| scaffold00835 | 28508 | 33987 | 5480  | 7.63  | C_unshiu_01556 | 16110  | 21573  | 5464  | 9.1   | 99.67 |
| scaffold00835 | 34914 | 68875 | 33962 | 47.27 | C_unshiu_01556 | 24030  | 57970  | 33941 | 56.53 | 99.93 |
| scaffold00836 | 1     | 39898 | 39898 | 55.69 | C_unshiu_00354 | 89054  | 128937 | 39884 | 16.69 | 99.95 |
| scaffold00836 | 19899 | 53059 | 33161 | 46.29 | C_unshiu_00354 | 108954 | 142099 | 33146 | 13.87 | 99.92 |
| scaffold00836 | 53558 | 55631 | 2074  | 2.89  | C_unshiu_00354 | 160785 | 158712 | 2074  | 0.87  | 100   |
| scaffold00836 | 55969 | 65883 | 9915  | 13.84 | C_unshiu_00354 | 158180 | 148308 | 9873  | 4.13  | 99.41 |
| scaffold00837 | 3067  | 7366  | 4300  | 6.01  | C_unshiu_00539 | 125844 | 121542 | 4303  | 2.37  | 99.42 |
| scaffold00837 | 5347  | 10403 | 5057  | 7.07  | C_unshiu_01323 | 14842  | 9813   | 5030  | 6.68  | 98.81 |
| scaffold00837 | 13960 | 18839 | 4880  | 6.82  | C_unshiu_00539 | 120732 | 115854 | 4879  | 2.69  | 98.53 |
| scaffold00837 | 22597 | 25437 | 2841  | 3.97  | C_unshiu_00539 | 113140 | 110291 | 2850  | 1.57  | 98.35 |
| scaffold00837 | 25956 | 41191 | 15236 | 21.3  | C_unshiu_00539 | 109791 | 94558  | 15234 | 8.41  | 99.93 |
| scaffold00837 | 43391 | 44743 | 1353  | 1.89  | C_unshiu_00539 | 91777  | 90425  | 1353  | 0.75  | 100   |
| scaffold00837 | 45656 | 60496 | 14841 | 20.74 | C_unshiu_00539 | 88697  | 73862  | 14836 | 8.19  | 99.42 |
| scaffold00837 | 61224 | 66194 | 4971  | 6.95  | C_unshiu_01985 | 32332  | 37288  | 4957  | 12.07 | 98.72 |
| scaffold00837 | 66194 | 68409 | 2216  | 3.1   | C_unshiu_00539 | 128386 | 126147 | 2240  | 1.24  | 98.3  |
| scaffold00838 | 28318 | 54683 | 26366 | 36.97 | C_unshiu_01645 | 35822  | 9455   | 26368 | 47.62 | 99.89 |
| scaffold00838 | 57772 | 59965 | 2194  | 3.08  | C_unshiu_01645 | 1      | 2165   | 2165  | 3.91  | 98.45 |

|               |       |       |       |       |                |        |        |       |       |       |
|---------------|-------|-------|-------|-------|----------------|--------|--------|-------|-------|-------|
| scaffold00839 | 10561 | 11740 | 1180  | 1.65  | C_unshiu_02087 | 34954  | 33775  | 1180  | 3.19  | 100   |
| scaffold00839 | 14167 | 15508 | 1342  | 1.88  | C_unshiu_02087 | 32125  | 30797  | 1329  | 3.59  | 98.59 |
| scaffold00839 | 27574 | 29215 | 1642  | 2.3   | C_unshiu_00884 | 41116  | 39476  | 1641  | 1.38  | 98.18 |
| scaffold00839 | 30508 | 31972 | 1465  | 2.05  | C_unshiu_00941 | 19880  | 18416  | 1465  | 1.3   | 100   |
| scaffold00839 | 32963 | 35042 | 2080  | 2.92  | C_unshiu_00941 | 16996  | 14917  | 2080  | 1.85  | 100   |
| scaffold00839 | 35034 | 37017 | 1984  | 2.78  | C_unshiu_00471 | 171253 | 173236 | 1984  | 0.99  | 100   |
| scaffold00839 | 37018 | 40456 | 3439  | 4.82  | C_unshiu_00941 | 12477  | 9051   | 3427  | 3.05  | 99.13 |
| scaffold00839 | 40763 | 42549 | 1787  | 2.51  | C_unshiu_00941 | 8718   | 6916   | 1803  | 1.61  | 98.12 |
| scaffold00839 | 44134 | 48801 | 4668  | 6.55  | C_unshiu_00941 | 4676   | 1      | 4676  | 4.16  | 98.51 |
| scaffold00839 | 55207 | 71307 | 16101 | 22.58 | C_unshiu_00579 | 37144  | 21105  | 16040 | 9.35  | 99.56 |
| scaffold00840 | 17494 | 19264 | 1771  | 2.5   | C_unshiu_00639 | 122893 | 124663 | 1771  | 1.12  | 100   |
| scaffold00840 | 19265 | 21155 | 1891  | 2.67  | C_unshiu_00709 | 60879  | 62769  | 1891  | 1.32  | 99.74 |
| scaffold00840 | 26517 | 31870 | 5354  | 7.56  | C_unshiu_02980 | 1423   | 6760   | 5338  | 39.6  | 98.79 |
| scaffold00840 | 35734 | 39072 | 3339  | 4.71  | C_unshiu_02980 | 10141  | 13479  | 3339  | 24.77 | 100   |
| scaffold00840 | 59514 | 62632 | 3119  | 4.4   | C_unshiu_00953 | 86309  | 83191  | 3119  | 2.8   | 100   |
| scaffold00840 | 68616 | 70835 | 2220  | 3.13  | C_unshiu_00953 | 76194  | 73975  | 2220  | 2     | 100   |
| scaffold00841 | 1     | 3769  | 3769  | 5.33  | C_unshiu_00080 | 276412 | 272643 | 3770  | 0.76  | 99.5  |
| scaffold00841 | 4168  | 5967  | 1800  | 2.55  | C_unshiu_02559 | 11371  | 9572   | 1800  | 7.8   | 99.94 |
| scaffold00841 | 6020  | 13676 | 7657  | 10.83 | C_unshiu_00080 | 269580 | 261923 | 7658  | 1.55  | 99.99 |
| scaffold00841 | 15521 | 18127 | 2607  | 3.69  | C_unshiu_00982 | 59973  | 62579  | 2607  | 2.4   | 100   |
| scaffold00842 | 1030  | 2376  | 1347  | 1.91  | C_unshiu_01905 | 1347   | 1      | 1347  | 3.03  | 100   |
| scaffold00842 | 9832  | 15058 | 5227  | 7.4   | C_unshiu_00132 | 30679  | 25396  | 5284  | 1.28  | 98.05 |
| scaffold00842 | 15232 | 16998 | 1767  | 2.5   | C_unshiu_00305 | 261753 | 263531 | 1779  | 0.68  | 98.71 |
| scaffold00842 | 20417 | 22290 | 1874  | 2.65  | C_unshiu_00132 | 18233  | 16358  | 1876  | 0.46  | 99.09 |
| scaffold00842 | 20429 | 25511 | 5083  | 7.19  | C_unshiu_00305 | 249438 | 244359 | 5080  | 1.93  | 99.33 |
| scaffold00842 | 27398 | 32342 | 4945  | 7     | C_unshiu_00305 | 243722 | 238795 | 4928  | 1.87  | 98.73 |
| scaffold00842 | 32748 | 33854 | 1107  | 1.57  | C_unshiu_00305 | 237828 | 236722 | 1107  | 0.42  | 99.37 |
| scaffold00842 | 34239 | 46324 | 12086 | 17.1  | C_unshiu_00305 | 236392 | 224327 | 12066 | 4.58  | 99.46 |
| scaffold00842 | 47464 | 52434 | 4971  | 7.03  | C_unshiu_02533 | 23813  | 18843  | 4971  | 20.88 | 99.92 |
| scaffold00842 | 53582 | 55046 | 1465  | 2.07  | C_unshiu_02290 | 19390  | 20853  | 1464  | 4.86  | 99.73 |
| scaffold00842 | 54063 | 56009 | 1947  | 2.76  | C_unshiu_02533 | 17940  | 15992  | 1949  | 8.18  | 99.44 |
| scaffold00842 | 56014 | 61429 | 5416  | 7.66  | C_unshiu_00722 | 41814  | 36399  | 5416  | 3.83  | 100   |
| scaffold00842 | 61430 | 63665 | 2236  | 3.16  | C_unshiu_02290 | 26729  | 28976  | 2248  | 7.46  | 99.42 |
| scaffold00842 | 67129 | 69583 | 2455  | 3.47  | C_unshiu_00735 | 34519  | 36973  | 2455  | 1.78  | 100   |
| scaffold00843 | 3459  | 5879  | 2421  | 3.43  | C_unshiu_00565 | 55265  | 57681  | 2417  | 1.38  | 98.1  |
| scaffold00843 | 12578 | 36747 | 24170 | 34.26 | C_unshiu_00565 | 58151  | 82295  | 24145 | 13.81 | 99.62 |
| scaffold00843 | 46448 | 56010 | 9563  | 13.56 | C_unshiu_01643 | 55433  | 45871  | 9563  | 17.25 | 99.98 |
| scaffold00843 | 55501 | 57705 | 2205  | 3.13  | C_unshiu_01643 | 45169  | 42957  | 2213  | 3.99  | 98.87 |
| scaffold00845 | 13766 | 47339 | 33574 | 47.64 | C_unshiu_00444 | 43917  | 77526  | 33610 | 16.07 | 99.04 |
| scaffold00845 | 47263 | 56159 | 8897  | 12.62 | C_unshiu_00444 | 21745  | 30638  | 8894  | 4.25  | 98.75 |
| scaffold00845 | 64939 | 66494 | 1556  | 2.21  | C_unshiu_00444 | 34733  | 36294  | 1562  | 0.75  | 99.3  |
| scaffold00846 | 1243  | 15019 | 13777 | 19.59 | C_unshiu_02033 | 9485   | 23307  | 13823 | 35.04 | 99.5  |
| scaffold00846 | 14979 | 19606 | 4628  | 6.58  | C_unshiu_02033 | 23310  | 27937  | 4628  | 11.73 | 100   |
| scaffold00846 | 19598 | 21750 | 2153  | 3.06  | C_unshiu_00171 | 308828 | 306676 | 2153  | 0.59  | 100   |
| scaffold00846 | 23260 | 31488 | 8229  | 11.7  | C_unshiu_02033 | 31213  | 39444  | 8232  | 20.87 | 99.11 |
| scaffold00846 | 35523 | 36949 | 1427  | 2.03  | C_unshiu_00906 | 24225  | 25652  | 1428  | 1.23  | 99.3  |
| scaffold00846 | 39475 | 43390 | 3916  | 5.57  | C_unshiu_00906 | 28329  | 32242  | 3914  | 3.36  | 99.95 |
| scaffold00846 | 47793 | 49903 | 2111  | 3     | C_unshiu_00906 | 36547  | 38659  | 2113  | 1.82  | 98.06 |
| scaffold00846 | 51447 | 55378 | 3932  | 5.59  | C_unshiu_00906 | 39203  | 43144  | 3942  | 3.39  | 98.78 |
| scaffold00846 | 56075 | 57981 | 1907  | 2.71  | C_unshiu_01040 | 48738  | 46826  | 1913  | 1.88  | 98.75 |
| scaffold00848 | 4559  | 9464  | 4906  | 7.01  | C_unshiu_00011 | 37800  | 32876  | 4925  | 0.51  | 98.17 |
| scaffold00848 | 19347 | 29890 | 10544 | 15.06 | C_unshiu_01460 | 55331  | 65917  | 10587 | 16.06 | 98.32 |
| scaffold00849 | 2011  | 11591 | 9581  | 13.71 | C_unshiu_02942 | 1      | 9509   | 9509  | 64.74 | 98.56 |
| scaffold00849 | 14274 | 17018 | 2745  | 3.93  | C_unshiu_00879 | 104654 | 107404 | 2751  | 2.3   | 98.26 |
| scaffold00849 | 30059 | 32745 | 2687  | 3.85  | C_unshiu_00174 | 11455  | 14140  | 2686  | 0.74  | 99.59 |
| scaffold00849 | 33551 | 35198 | 1648  | 2.36  | C_unshiu_01268 | 66428  | 68075  | 1648  | 2.07  | 98.18 |
| scaffold00849 | 36755 | 44385 | 7631  | 10.92 | C_unshiu_00879 | 53580  | 61207  | 7628  | 6.39  | 99.17 |
| scaffold00850 | 10208 | 31612 | 21405 | 30.69 | C_unshiu_01439 | 19224  | 40609  | 21386 | 31.66 | 99.18 |
| scaffold00850 | 34711 | 36901 | 2191  | 3.14  | C_unshiu_01439 | 42311  | 44502  | 2192  | 3.24  | 99.77 |
| scaffold00850 | 42087 | 43125 | 1039  | 1.49  | C_unshiu_01439 | 49101  | 50139  | 1039  | 1.54  | 99.71 |
| scaffold00850 | 43725 | 45052 | 1328  | 1.9   | C_unshiu_02240 | 24304  | 22977  | 1328  | 4.15  | 99.85 |
| scaffold00850 | 45272 | 46933 | 1662  | 2.38  | C_unshiu_02240 | 28150  | 26487  | 1664  | 5.2   | 98.98 |
| scaffold00850 | 58411 | 60870 | 2460  | 3.53  | C_unshiu_02240 | 19022  | 16555  | 2468  | 7.71  | 98.5  |
| scaffold00851 | 1526  | 3828  | 2303  | 3.31  | C_unshiu_00539 | 65378  | 67658  | 2281  | 1.26  | 98.44 |
| scaffold00851 | 5121  | 15271 | 10151 | 14.59 | C_unshiu_00539 | 48859  | 38702  | 10158 | 5.61  | 99.44 |
| scaffold00851 | 14791 | 32544 | 17754 | 25.51 | C_unshiu_00539 | 39029  | 21252  | 17778 | 9.81  | 99.66 |
| scaffold00851 | 39996 | 43660 | 3665  | 5.27  | C_unshiu_02077 | 25238  | 21574  | 3665  | 9.8   | 100   |
| scaffold00851 | 53884 | 69590 | 15707 | 22.57 | C_unshiu_02010 | 10306  | 26044  | 15739 | 39.02 | 99.29 |
| scaffold00852 | 1     | 4633  | 4633  | 6.66  | C_unshiu_01783 | 16782  | 21450  | 4669  | 9.5   | 98.5  |
| scaffold00852 | 11840 | 17973 | 6134  | 8.81  | C_unshiu_01783 | 29106  | 35240  | 6135  | 12.48 | 99.98 |
| scaffold00852 | 18574 | 23751 | 5178  | 7.44  | C_unshiu_01783 | 36358  | 41546  | 5189  | 10.55 | 99.19 |
| scaffold00852 | 40141 | 50310 | 10170 | 14.61 | C_unshiu_02964 | 3      | 10144  | 10142 | 72.46 | 98.65 |
| scaffold00852 | 51638 | 53808 | 2171  | 3.12  | C_unshiu_02964 | 10222  | 12384  | 2163  | 15.45 | 99.45 |
| scaffold00852 | 55579 | 56896 | 1318  | 1.89  | C_unshiu_00986 | 106314 | 107631 | 1318  | 1.22  | 99.7  |
| scaffold00853 | 3019  | 4039  | 1021  | 1.47  | C_unshiu_01982 | 32213  | 31193  | 1021  | 2.48  | 99.12 |
| scaffold00853 | 4042  | 5068  | 1027  | 1.48  | C_unshiu_01068 | 42523  | 43549  | 1027  | 1.04  | 99.51 |
| scaffold00853 | 5276  | 11052 | 5777  | 8.33  | C_unshiu_01068 | 43858  | 49634  | 5777  | 5.84  | 100   |
| scaffold00853 | 11096 | 19046 | 7951  | 11.46 | C_unshiu_01068 | 50081  | 58031  | 7951  | 8.04  | 99.85 |
| scaffold00853 | 19860 | 21412 | 1553  | 2.24  | C_unshiu_01068 | 59640  | 61196  | 1557  | 1.58  | 98.72 |

|               |       |       |       |       |                |        |        |       |       |       |
|---------------|-------|-------|-------|-------|----------------|--------|--------|-------|-------|-------|
| scaffold00853 | 22184 | 25777 | 3594  | 5.18  | C_unshiu_01068 | 62528  | 66121  | 3594  | 3.64  | 100   |
| scaffold00853 | 28833 | 31233 | 2401  | 3.46  | C_unshiu_01068 | 67934  | 70334  | 2401  | 2.43  | 100   |
| scaffold00853 | 35315 | 36949 | 1635  | 2.36  | C_unshiu_01448 | 60962  | 59335  | 1628  | 2.44  | 99.33 |
| scaffold00853 | 45168 | 48791 | 3624  | 5.22  | C_unshiu_02206 | 28770  | 25184  | 3587  | 10.86 | 98.4  |
| scaffold00853 | 51364 | 69365 | 18002 | 25.95 | C_unshiu_02206 | 21032  | 3051   | 17982 | 54.44 | 98.72 |
| scaffold00854 | 3862  | 31168 | 27307 | 39.64 | C_unshiu_00776 | 104621 | 131832 | 27212 | 20.64 | 98.61 |
| scaffold00854 | 46909 | 51215 | 4307  | 6.25  | C_unshiu_01274 | 2869   | 7187   | 4319  | 5.46  | 99.21 |
| scaffold00854 | 51318 | 59614 | 8297  | 12.04 | C_unshiu_01274 | 7416   | 15710  | 8295  | 10.48 | 99.78 |
| scaffold00854 | 60135 | 61723 | 1589  | 2.31  | C_unshiu_01274 | 16969  | 18553  | 1585  | 2     | 98.99 |
| scaffold00854 | 62599 | 64677 | 2079  | 3.02  | C_unshiu_01011 | 10261  | 12339  | 2079  | 1.98  | 100   |
| scaffold00854 | 64678 | 68892 | 4215  | 6.12  | C_unshiu_01045 | 37830  | 42048  | 4219  | 4.17  | 98.44 |
| scaffold00855 | 14938 | 27022 | 12085 | 17.6  | C_unshiu_02193 | 31165  | 19055  | 12111 | 36.23 | 98.93 |
| scaffold00855 | 35826 | 47283 | 11458 | 16.69 | C_unshiu_03049 | 11439  | 1      | 11439 | 100   | 98.45 |
| scaffold00855 | 58386 | 68662 | 10277 | 14.97 | C_unshiu_01201 | 9277   | 19496  | 10220 | 11.94 | 98.4  |
| scaffold00856 | 16873 | 41279 | 24407 | 35.59 | C_unshiu_00649 | 62352  | 37985  | 24368 | 15.53 | 99.34 |
| scaffold00856 | 43256 | 54478 | 11223 | 16.37 | C_unshiu_00649 | 38085  | 26857  | 11229 | 7.16  | 99    |
| scaffold00856 | 59325 | 67163 | 7839  | 11.43 | C_unshiu_00649 | 23146  | 15308  | 7839  | 5     | 100   |
| scaffold00857 | 5874  | 7307  | 1434  | 2.09  | C_unshiu_02316 | 11592  | 10159  | 1434  | 4.88  | 100   |
| scaffold00857 | 27907 | 36236 | 8330  | 12.15 | C_unshiu_00625 | 128530 | 120189 | 8342  | 5.15  | 99.68 |
| scaffold00857 | 36154 | 47854 | 11701 | 17.07 | C_unshiu_00625 | 120177 | 108559 | 11619 | 7.18  | 98.98 |
| scaffold00857 | 49034 | 58141 | 9108  | 13.29 | C_unshiu_01141 | 18280  | 9173   | 9108  | 9.92  | 100   |
| scaffold00857 | 62498 | 67987 | 5490  | 8.01  | C_unshiu_01141 | 5486   | 1      | 5486  | 5.98  | 99.87 |
| scaffold00858 | 628   | 29854 | 29227 | 42.68 | C_unshiu_00055 | 473263 | 502517 | 29255 | 4.92  | 99.87 |
| scaffold00858 | 9898  | 41991 | 32094 | 46.86 | C_unshiu_00055 | 482535 | 514654 | 32120 | 5.4   | 99.9  |
| scaffold00858 | 41992 | 43343 | 1352  | 1.97  | C_unshiu_00055 | 514867 | 516217 | 1351  | 0.23  | 98.09 |
| scaffold00858 | 47727 | 58702 | 10976 | 16.03 | C_unshiu_00055 | 516217 | 527192 | 10976 | 1.85  | 100   |
| scaffold00858 | 60230 | 61849 | 1620  | 2.37  | C_unshiu_00055 | 527414 | 529027 | 1614  | 0.27  | 99.26 |
| scaffold00858 | 61850 | 65488 | 3639  | 5.31  | C_unshiu_00055 | 528963 | 532601 | 3639  | 0.61  | 100   |
| scaffold00859 | 4554  | 5811  | 1258  | 1.84  | C_unshiu_01265 | 17769  | 19026  | 1258  | 1.58  | 99.6  |
| scaffold00859 | 14497 | 19146 | 4650  | 6.8   | C_unshiu_01265 | 27761  | 32411  | 4651  | 5.83  | 99.38 |
| scaffold00859 | 20028 | 21345 | 1318  | 1.93  | C_unshiu_01265 | 33710  | 35028  | 1319  | 1.65  | 99.85 |
| scaffold00859 | 22753 | 24814 | 2062  | 3.01  | C_unshiu_01265 | 36283  | 38342  | 2060  | 2.58  | 99.61 |
| scaffold00859 | 35677 | 42279 | 6603  | 9.65  | C_unshiu_00017 | 174545 | 167863 | 6683  | 0.78  | 98.56 |
| scaffold00859 | 43776 | 49203 | 5428  | 7.93  | C_unshiu_00595 | 286    | 5767   | 5482  | 3.25  | 98.81 |
| scaffold00859 | 49468 | 55517 | 6050  | 8.84  | C_unshiu_00595 | 6520   | 12576  | 6057  | 3.59  | 98.55 |
| scaffold00860 | 5770  | 12457 | 6688  | 9.78  | C_unshiu_00175 | 265471 | 272158 | 6688  | 1.85  | 100   |
| scaffold00860 | 12458 | 25190 | 12733 | 18.62 | C_unshiu_01244 | 71515  | 58793  | 12723 | 15.63 | 99.68 |
| scaffold00860 | 29799 | 31711 | 1913  | 2.8   | C_unshiu_01244 | 53006  | 51094  | 1913  | 2.35  | 100   |
| scaffold00860 | 34808 | 36811 | 2004  | 2.93  | C_unshiu_01244 | 20671  | 18668  | 2004  | 2.46  | 99.25 |
| scaffold00860 | 35170 | 37188 | 2019  | 2.95  | C_unshiu_01244 | 49216  | 47199  | 2018  | 2.48  | 99.8  |
| scaffold00860 | 40088 | 42200 | 2113  | 3.09  | C_unshiu_00316 | 16155  | 14043  | 2113  | 0.82  | 100   |
| scaffold00860 | 60051 | 61892 | 1842  | 2.69  | C_unshiu_01767 | 5485   | 7326   | 1842  | 3.7   | 100   |
| scaffold00861 | 32938 | 34315 | 1378  | 2.02  | C_unshiu_00894 | 92110  | 90733  | 1378  | 1.17  | 100   |
| scaffold00861 | 36879 | 42272 | 5394  | 7.9   | C_unshiu_00894 | 87616  | 82223  | 5394  | 4.58  | 99.67 |
| scaffold00861 | 44557 | 46600 | 2044  | 2.99  | C_unshiu_00894 | 79192  | 77149  | 2044  | 1.74  | 100   |
| scaffold00861 | 50780 | 52762 | 1983  | 2.91  | C_unshiu_00448 | 95675  | 93683  | 1993  | 0.96  | 98.45 |
| scaffold00861 | 56123 | 59273 | 3151  | 4.62  | C_unshiu_00894 | 67613  | 64454  | 3160  | 2.69  | 99.18 |
| scaffold00862 | 1489  | 3568  | 2080  | 3.05  | C_unshiu_00045 | 489216 | 487137 | 2080  | 0.33  | 100   |
| scaffold00862 | 10670 | 17572 | 6903  | 10.13 | C_unshiu_02024 | 6      | 6873   | 6868  | 17.3  | 98.03 |
| scaffold00862 | 32286 | 36886 | 4601  | 6.75  | C_unshiu_02024 | 29309  | 33912  | 4604  | 11.6  | 98.33 |
| scaffold00862 | 62811 | 68140 | 5330  | 7.82  | C_unshiu_01062 | 32433  | 27102  | 5332  | 5.39  | 98.37 |
| scaffold00863 | 2839  | 20426 | 17588 | 25.8  | C_unshiu_02383 | 5533   | 23164  | 17632 | 63.84 | 99.11 |
| scaffold00863 | 20750 | 23600 | 2851  | 4.18  | C_unshiu_02383 | 23363  | 26200  | 2838  | 10.28 | 99.33 |
| scaffold00863 | 31927 | 33110 | 1184  | 1.74  | C_unshiu_01068 | 78945  | 77762  | 1184  | 1.2   | 99.24 |
| scaffold00863 | 36295 | 39044 | 2750  | 4.03  | C_unshiu_02125 | 7423   | 10170  | 2748  | 7.68  | 99.85 |
| scaffold00863 | 40820 | 43211 | 2392  | 3.51  | C_unshiu_02125 | 12309  | 14700  | 2392  | 6.69  | 99.46 |
| scaffold00863 | 43327 | 56102 | 12776 | 18.74 | C_unshiu_02125 | 14837  | 27552  | 12716 | 35.54 | 99.16 |
| scaffold00864 | 13891 | 16586 | 2696  | 3.96  | C_unshiu_01392 | 35038  | 32343  | 2696  | 3.8   | 100   |
| scaffold00864 | 16611 | 21619 | 5009  | 7.37  | C_unshiu_01392 | 31997  | 26974  | 5024  | 7.08  | 98.71 |
| scaffold00864 | 22691 | 31546 | 8856  | 13.02 | C_unshiu_02367 | 19374  | 10501  | 8874  | 31.79 | 98.08 |
| scaffold00864 | 44341 | 46053 | 1713  | 2.52  | C_unshiu_00018 | 59859  | 58147  | 1713  | 0.2   | 98.95 |
| scaffold00864 | 46544 | 51296 | 4753  | 6.99  | C_unshiu_00018 | 57132  | 52381  | 4752  | 0.56  | 99.54 |
| scaffold00864 | 53114 | 54549 | 1436  | 2.11  | C_unshiu_00018 | 35802  | 34367  | 1436  | 0.17  | 99.03 |
| scaffold00865 | 1     | 1128  | 1128  | 1.66  | C_unshiu_00170 | 362537 | 363664 | 1128  | 0.31  | 100   |
| scaffold00865 | 4952  | 6707  | 1756  | 2.58  | C_unshiu_00552 | 156630 | 154875 | 1756  | 0.98  | 100   |
| scaffold00865 | 6708  | 11629 | 4922  | 7.24  | C_unshiu_01211 | 20442  | 25363  | 4922  | 5.84  | 99.67 |
| scaffold00865 | 11638 | 21268 | 9631  | 14.16 | C_unshiu_01211 | 25724  | 35287  | 9564  | 11.35 | 99.13 |
| scaffold00865 | 20403 | 29884 | 9482  | 13.94 | C_unshiu_01327 | 22411  | 12870  | 9542  | 12.68 | 98.53 |
| scaffold00865 | 52655 | 56928 | 4274  | 6.29  | C_unshiu_01923 | 3237   | 7510   | 4274  | 9.74  | 99.95 |
| scaffold00865 | 57458 | 58828 | 1371  | 2.02  | C_unshiu_01923 | 8525   | 9895   | 1371  | 3.12  | 99.85 |
| scaffold00866 | 2791  | 47213 | 44423 | 65.34 | C_unshiu_00991 | 3419   | 47771  | 44353 | 41.3  | 99.59 |
| scaffold00866 | 48631 | 53238 | 4608  | 6.78  | C_unshiu_00991 | 49256  | 53865  | 4610  | 4.29  | 99.5  |
| scaffold00866 | 61472 | 62901 | 1430  | 2.1   | C_unshiu_01203 | 68934  | 67505  | 1430  | 1.68  | 100   |
| scaffold00867 | 1234  | 5956  | 4723  | 6.96  | C_unshiu_02328 | 24304  | 29029  | 4726  | 16.28 | 98.02 |
| scaffold00867 | 8547  | 24566 | 16020 | 23.6  | C_unshiu_01296 | 77623  | 61679  | 15945 | 20.54 | 98.69 |
| scaffold00867 | 25652 | 44553 | 18902 | 27.85 | C_unshiu_01296 | 60713  | 41905  | 18809 | 24.23 | 98.82 |
| scaffold00867 | 44957 | 64421 | 19465 | 28.68 | C_unshiu_01296 | 40886  | 21492  | 19395 | 24.99 | 99.27 |
| scaffold00868 | 5965  | 43357 | 37393 | 55.27 | C_unshiu_01568 | 513    | 37864  | 37352 | 63.04 | 99.6  |
| scaffold00868 | 43715 | 48645 | 4931  | 7.29  | C_unshiu_01441 | 55508  | 50578  | 4931  | 7.32  | 100   |

|               |       |       |       |       |                |         |         |       |       |       |
|---------------|-------|-------|-------|-------|----------------|---------|---------|-------|-------|-------|
| scaffold00868 | 55305 | 65367 | 10063 | 14.87 | C_unshiu_01568 | 49192   | 59254   | 10063 | 16.98 | 99.99 |
| scaffold00869 | 1     | 3944  | 3944  | 5.85  | C_unshiu_00697 | 81568   | 77634   | 3935  | 2.73  | 99.27 |
| scaffold00869 | 7265  | 20566 | 13302 | 19.72 | C_unshiu_00697 | 70406   | 57101   | 13306 | 9.24  | 99.86 |
| scaffold00869 | 41127 | 54952 | 13826 | 20.5  | C_unshiu_01280 | 51592   | 65386   | 13795 | 17.51 | 99.18 |
| scaffold00869 | 56314 | 58595 | 2282  | 3.38  | C_unshiu_01280 | 67357   | 69638   | 2282  | 2.9   | 100   |
| scaffold00869 | 59858 | 62967 | 3110  | 4.61  | C_unshiu_01280 | 71231   | 74339   | 3109  | 3.95  | 99.9  |
| scaffold00870 | 11595 | 14117 | 2523  | 3.74  | C_unshiu_01323 | 21231   | 23753   | 2523  | 3.35  | 100   |
| scaffold00870 | 27735 | 34729 | 6995  | 10.38 | C_unshiu_00474 | 57709   | 50715   | 6995  | 3.48  | 100   |
| scaffold00870 | 43446 | 49535 | 6090  | 9.03  | C_unshiu_00065 | 507897  | 501808  | 6090  | 1.1   | 100   |
| scaffold00870 | 56598 | 67415 | 10818 | 16.05 | C_unshiu_00065 | 494976  | 484159  | 10818 | 1.96  | 99.99 |
| scaffold00871 | 14158 | 18971 | 4814  | 7.15  | C_unshiu_02128 | 11544   | 16357   | 4814  | 13.5  | 99.92 |
| scaffold00871 | 19494 | 21175 | 1682  | 2.5   | C_unshiu_00786 | 15221   | 16889   | 1669  | 1.28  | 99.05 |
| scaffold00871 | 26674 | 27850 | 1177  | 1.75  | C_unshiu_02128 | 23558   | 24737   | 1180  | 3.31  | 98.81 |
| scaffold00871 | 41493 | 43240 | 1748  | 2.6   | C_unshiu_01806 | 23953   | 22206   | 1748  | 3.62  | 98.97 |
| scaffold00871 | 52850 | 55132 | 2283  | 3.39  | C_unshiu_01806 | 38249   | 35966   | 2284  | 4.73  | 99.91 |
| scaffold00871 | 59845 | 61419 | 1575  | 2.34  | C_unshiu_01806 | 29764   | 28190   | 1575  | 3.26  | 100   |
| scaffold00871 | 61958 | 64269 | 2312  | 3.44  | C_unshiu_01806 | 27455   | 25176   | 2280  | 4.72  | 98.01 |
| scaffold00872 | 1     | 11921 | 11921 | 17.77 | C_unshiu_01597 | 19544   | 31546   | 12003 | 20.85 | 98.48 |
| scaffold00872 | 11908 | 13802 | 1895  | 2.82  | C_unshiu_01597 | 31963   | 33857   | 1895  | 3.29  | 99.95 |
| scaffold00872 | 20476 | 24884 | 4409  | 6.57  | C_unshiu_01597 | 38724   | 43143   | 4420  | 7.68  | 99.43 |
| scaffold00872 | 26389 | 30555 | 4167  | 6.21  | C_unshiu_01926 | 574     | 4738    | 4165  | 9.5   | 99.21 |
| scaffold00872 | 31245 | 32732 | 1488  | 2.22  | C_unshiu_01926 | 5689    | 7178    | 1490  | 3.4   | 99.87 |
| scaffold00872 | 37745 | 46620 | 8876  | 13.23 | C_unshiu_02438 | 5       | 8879    | 8875  | 33.5  | 99.4  |
| scaffold00872 | 60834 | 65023 | 4190  | 6.25  | C_unshiu_00573 | 1       | 4190    | 4190  | 2.43  | 99.98 |
| scaffold00872 | 65500 | 67084 | 1585  | 2.36  | C_unshiu_00573 | 5101    | 6700    | 1600  | 0.93  | 98    |
| scaffold00873 | 18699 | 25207 | 6509  | 9.73  | C_unshiu_00691 | 1       | 6480    | 6480  | 4.46  | 99.22 |
| scaffold00873 | 27013 | 31238 | 4226  | 6.32  | C_unshiu_00691 | 9069    | 13294   | 4226  | 2.91  | 99.98 |
| scaffold00873 | 36321 | 39820 | 3500  | 5.23  | C_unshiu_00408 | 15420   | 18922   | 3503  | 1.58  | 98.4  |
| scaffold00873 | 53157 | 56764 | 3608  | 5.39  | C_unshiu_00480 | 115656  | 112060  | 3597  | 1.82  | 99.67 |
| scaffold00873 | 57003 | 62127 | 5125  | 7.66  | C_unshiu_00480 | 111976  | 106842  | 5135  | 2.59  | 98.03 |
| scaffold00874 | 3737  | 6044  | 2308  | 3.45  | C_unshiu_02907 | 15028   | 12722   | 2307  | 14.81 | 99.78 |
| scaffold00874 | 6096  | 8703  | 2608  | 3.9   | C_unshiu_02907 | 12920   | 10331   | 2590  | 16.63 | 98.47 |
| scaffold00874 | 8723  | 11679 | 2957  | 4.42  | C_unshiu_00878 | 71466   | 74399   | 2934  | 2.46  | 99.22 |
| scaffold00874 | 12944 | 15611 | 2668  | 3.99  | C_unshiu_00878 | 76042   | 78703   | 2662  | 2.23  | 99.78 |
| scaffold00874 | 15637 | 26887 | 11251 | 16.83 | C_unshiu_00878 | 78002   | 89263   | 11262 | 9.42  | 98.96 |
| scaffold00874 | 39001 | 40365 | 1365  | 2.04  | C_unshiu_01574 | 21730   | 20367   | 1364  | 2.32  | 99.12 |
| scaffold00874 | 53472 | 55022 | 1551  | 2.32  | C_unshiu_01574 | 6633    | 5106    | 1528  | 2.59  | 98.2  |
| scaffold00875 | 345   | 17819 | 17475 | 26.13 | C_unshiu_00406 | 77378   | 59922   | 17457 | 7.86  | 99.79 |
| scaffold00875 | 24587 | 33908 | 9322  | 13.94 | C_unshiu_00406 | 59692   | 50371   | 9322  | 4.2   | 99.67 |
| scaffold00875 | 46862 | 52563 | 5702  | 8.53  | C_unshiu_01935 | 19011   | 24712   | 5702  | 13.16 | 99.98 |
| scaffold00875 | 52887 | 55564 | 2678  | 4     | C_unshiu_01935 | 25525   | 28202   | 2678  | 6.18  | 100   |
| scaffold00875 | 56412 | 57881 | 1470  | 2.2   | C_unshiu_01935 | 29064   | 30533   | 1470  | 3.39  | 99.93 |
| scaffold00875 | 65247 | 66873 | 1627  | 2.43  | C_unshiu_00382 | 179034  | 177408  | 1627  | 0.71  | 100   |
| scaffold00876 | 526   | 1643  | 1118  | 1.67  | C_unshiu_02544 | 7952    | 9069    | 1118  | 4.77  | 100   |
| scaffold00876 | 2724  | 26256 | 23533 | 35.22 | C_unshiu_01199 | 45802   | 69365   | 23564 | 27.47 | 99.67 |
| scaffold00876 | 27034 | 35014 | 7981  | 11.94 | C_unshiu_01199 | 70528   | 78508   | 7981  | 9.3   | 100   |
| scaffold00876 | 35026 | 40945 | 5920  | 8.86  | C_unshiu_01199 | 79823   | 85781   | 5959  | 6.95  | 98.94 |
| scaffold00876 | 42815 | 47295 | 4481  | 6.71  | C_unshiu_00095 | 369059  | 373539  | 4481  | 0.96  | 100   |
| scaffold00877 | 1     | 8210  | 8210  | 12.31 | C_unshiu_00646 | 44513   | 36293   | 8221  | 5.2   | 99.61 |
| scaffold00877 | 8093  | 28209 | 20117 | 30.16 | C_unshiu_00646 | 36295   | 16175   | 20121 | 12.74 | 99.97 |
| scaffold00877 | 43345 | 61325 | 17981 | 26.95 | C_unshiu_00464 | 203474  | 185494  | 17981 | 8.83  | 99.76 |
| scaffold00877 | 61436 | 63237 | 1802  | 2.7   | C_unshiu_00464 | 185103  | 183301  | 1803  | 0.89  | 99.94 |
| scaffold00877 | 63260 | 66711 | 3452  | 5.17  | C_unshiu_00001 | 1134928 | 1131485 | 3444  | 0.13  | 98.96 |
| scaffold00878 | 1889  | 56931 | 55043 | 82.65 | C_unshiu_00357 | 189422  | 134409  | 55014 | 23.18 | 99.65 |
| scaffold00878 | 57868 | 61954 | 4087  | 6.14  | C_unshiu_00357 | 133193  | 129123  | 4071  | 1.72  | 98.95 |
| scaffold00878 | 64802 | 66038 | 1237  | 1.86  | C_unshiu_00357 | 127912  | 126675  | 1238  | 0.52  | 98.87 |
| scaffold00880 | 1     | 4803  | 4803  | 7.23  | C_unshiu_01453 | 56079   | 60882   | 4804  | 7.25  | 99.92 |
| scaffold00880 | 16285 | 25687 | 9403  | 14.16 | C_unshiu_01057 | 44667   | 35245   | 9423  | 9.46  | 99.43 |
| scaffold00880 | 31204 | 43442 | 12239 | 18.42 | C_unshiu_01057 | 27603   | 15431   | 12173 | 12.23 | 98.98 |
| scaffold00880 | 43578 | 49206 | 5629  | 8.47  | C_unshiu_01057 | 15021   | 9394    | 5628  | 5.65  | 99.86 |
| scaffold00880 | 51338 | 58242 | 6905  | 10.39 | C_unshiu_01057 | 6889    | 1       | 6889  | 6.92  | 99.59 |
| scaffold00881 | 1     | 1211  | 1211  | 1.83  | C_unshiu_01431 | 18625   | 19835   | 1211  | 1.77  | 100   |
| scaffold00881 | 2769  | 18400 | 15632 | 23.68 | C_unshiu_01431 | 21845   | 37494   | 15650 | 22.93 | 99.78 |
| scaffold00881 | 18401 | 20051 | 1651  | 2.5   | C_unshiu_00204 | 45846   | 44196   | 1651  | 0.5   | 100   |
| scaffold00881 | 21546 | 30166 | 8621  | 13.06 | C_unshiu_02956 | 134     | 8756    | 8623  | 60.56 | 99.85 |
| scaffold00881 | 30162 | 36643 | 6482  | 9.82  | C_unshiu_00234 | 57780   | 64261   | 6482  | 2.12  | 100   |
| scaffold00881 | 36644 | 38980 | 2337  | 3.54  | C_unshiu_01537 | 58289   | 55956   | 2334  | 3.82  | 98.89 |
| scaffold00881 | 39056 | 46760 | 7705  | 11.67 | C_unshiu_01537 | 55854   | 48142   | 7713  | 12.61 | 98.96 |
| scaffold00881 | 47659 | 49484 | 1826  | 2.77  | C_unshiu_01537 | 46787   | 44962   | 1826  | 2.99  | 98.85 |
| scaffold00881 | 61916 | 63786 | 1871  | 2.83  | C_unshiu_01537 | 33222   | 31347   | 1876  | 3.07  | 98.35 |
| scaffold00882 | 7311  | 12280 | 4970  | 7.57  | C_unshiu_00046 | 151899  | 156868  | 4970  | 0.78  | 100   |
| scaffold00882 | 12281 | 34434 | 22154 | 33.75 | C_unshiu_00732 | 89282   | 111418  | 22137 | 15.98 | 99.78 |
| scaffold00882 | 36545 | 40874 | 4330  | 6.6   | C_unshiu_00732 | 112495  | 116791  | 4297  | 3.1   | 98.11 |
| scaffold00882 | 45403 | 52755 | 7353  | 11.2  | C_unshiu_02742 | 11491   | 4140    | 7352  | 38.4  | 99.99 |
| scaffold00883 | 21409 | 36354 | 14946 | 22.82 | C_unshiu_02550 | 18751   | 3738    | 15014 | 64.53 | 99.53 |
| scaffold00884 | 5768  | 7408  | 1641  | 2.51  | C_unshiu_01209 | 79877   | 78237   | 1641  | 1.94  | 99.82 |
| scaffold00884 | 7410  | 9863  | 2454  | 3.75  | C_unshiu_01209 | 78062   | 75609   | 2454  | 2.9   | 99.88 |
| scaffold00884 | 18282 | 23948 | 5667  | 8.66  | C_unshiu_01209 | 74057   | 68403   | 5655  | 6.68  | 98.8  |
| scaffold00884 | 26653 | 28679 | 2027  | 3.1   | C_unshiu_01209 | 65374   | 63348   | 2027  | 2.39  | 100   |

|               |       |       |       |       |                |        |        |       |       |       |
|---------------|-------|-------|-------|-------|----------------|--------|--------|-------|-------|-------|
| scaffold00884 | 37894 | 43751 | 5858  | 8.95  | C_unshiu_01209 | 53661  | 47828  | 5834  | 6.89  | 99.13 |
| scaffold00884 | 45740 | 54985 | 9246  | 14.12 | C_unshiu_01209 | 46700  | 37441  | 9260  | 10.94 | 98.81 |
| scaffold00884 | 57396 | 59110 | 1715  | 2.62  | C_unshiu_01209 | 57527  | 55814  | 1714  | 2.02  | 98.78 |
| scaffold00884 | 59544 | 60826 | 1283  | 1.96  | C_unshiu_02560 | 6429   | 7711   | 1283  | 5.57  | 99.69 |
| scaffold00884 | 60929 | 65459 | 4531  | 6.92  | C_unshiu_02560 | 7855   | 12384  | 4530  | 19.65 | 99.91 |
| scaffold00885 | 624   | 1745  | 1122  | 1.71  | C_unshiu_00078 | 58630  | 57510  | 1121  | 0.22  | 99.29 |
| scaffold00885 | 2821  | 4513  | 1693  | 2.59  | C_unshiu_00078 | 61061  | 59369  | 1693  | 0.34  | 99.23 |
| scaffold00885 | 8024  | 13555 | 5532  | 8.45  | C_unshiu_00668 | 4303   | 9832   | 5530  | 3.62  | 99.48 |
| scaffold00885 | 17930 | 37201 | 19272 | 29.45 | C_unshiu_00668 | 16666  | 35955  | 19290 | 12.64 | 99.87 |
| scaffold00885 | 38017 | 41699 | 3683  | 5.63  | C_unshiu_00668 | 37882  | 41565  | 3684  | 2.41  | 99.97 |
| scaffold00885 | 43531 | 49537 | 6007  | 9.18  | C_unshiu_00668 | 43883  | 49889  | 6007  | 3.94  | 99.9  |
| scaffold00885 | 49034 | 56044 | 7011  | 10.71 | C_unshiu_00668 | 50682  | 57663  | 6982  | 4.57  | 99.44 |
| scaffold00885 | 55537 | 61182 | 5646  | 8.63  | C_unshiu_00668 | 57662  | 63300  | 5639  | 3.69  | 99.84 |
| scaffold00886 | 2134  | 4204  | 2071  | 3.17  | C_unshiu_02806 | 16031  | 13960  | 2072  | 11.63 | 99.61 |
| scaffold00886 | 4749  | 17839 | 13091 | 20.01 | C_unshiu_02806 | 13080  | 1      | 13080 | 73.41 | 99.71 |
| scaffold00886 | 12032 | 19912 | 7881  | 12.05 | C_unshiu_00776 | 94195  | 86318  | 7878  | 5.98  | 99.06 |
| scaffold00886 | 19383 | 21708 | 2326  | 3.56  | C_unshiu_00776 | 86320  | 83995  | 2326  | 1.76  | 100   |
| scaffold00886 | 21936 | 39350 | 17415 | 26.62 | C_unshiu_00776 | 83482  | 66069  | 17414 | 13.21 | 99.98 |
| scaffold00886 | 39266 | 56511 | 17246 | 26.36 | C_unshiu_00776 | 66076  | 48831  | 17246 | 13.08 | 100   |
| scaffold00886 | 56507 | 59179 | 2673  | 4.09  | C_unshiu_01375 | 24689  | 27361  | 2673  | 3.7   | 100   |
| scaffold00886 | 60179 | 65426 | 5248  | 8.02  | C_unshiu_00776 | 44837  | 39590  | 5248  | 3.98  | 100   |
| scaffold00887 | 4866  | 6069  | 1204  | 1.84  | C_unshiu_01040 | 68237  | 69441  | 1205  | 1.18  | 99.09 |
| scaffold00887 | 39011 | 58061 | 19051 | 29.14 | C_unshiu_01201 | 38480  | 19453  | 19028 | 22.22 | 99.08 |
| scaffold00888 | 1895  | 3104  | 1210  | 1.85  | C_unshiu_01043 | 23986  | 25183  | 1198  | 1.18  | 98.68 |
| scaffold00888 | 5982  | 11659 | 5678  | 8.69  | C_unshiu_01043 | 25110  | 30779  | 5670  | 5.59  | 99.86 |
| scaffold00888 | 11764 | 14328 | 2565  | 3.93  | C_unshiu_01043 | 31326  | 33889  | 2564  | 2.53  | 99.53 |
| scaffold00888 | 20204 | 23100 | 2897  | 4.43  | C_unshiu_01043 | 39087  | 41983  | 2897  | 2.86  | 100   |
| scaffold00888 | 29072 | 31282 | 2211  | 3.38  | C_unshiu_01043 | 47509  | 49719  | 2211  | 2.18  | 99.95 |
| scaffold00888 | 32704 | 38095 | 5392  | 8.25  | C_unshiu_01043 | 49940  | 55286  | 5347  | 5.27  | 98.48 |
| scaffold00888 | 39460 | 47576 | 8117  | 12.42 | C_unshiu_01043 | 57271  | 65386  | 8116  | 8.01  | 99.83 |
| scaffold00888 | 48599 | 52727 | 4129  | 6.32  | C_unshiu_01043 | 66629  | 70746  | 4118  | 4.06  | 98.45 |
| scaffold00888 | 53077 | 54477 | 1401  | 2.14  | C_unshiu_01043 | 71065  | 72464  | 1400  | 1.38  | 99.21 |
| scaffold00888 | 56784 | 57808 | 1025  | 1.57  | C_unshiu_01043 | 74642  | 75666  | 1025  | 1.01  | 99.32 |
| scaffold00888 | 57952 | 64208 | 6257  | 9.58  | C_unshiu_01043 | 75981  | 82148  | 6168  | 6.08  | 98.18 |
| scaffold00889 | 1     | 3985  | 3985  | 6.1   | C_unshiu_01134 | 27586  | 31574  | 3989  | 4.32  | 99.57 |
| scaffold00889 | 8374  | 13762 | 5389  | 8.25  | C_unshiu_01134 | 34925  | 40313  | 5389  | 5.83  | 100   |
| scaffold00889 | 40511 | 55312 | 14802 | 22.65 | C_unshiu_01134 | 58263  | 73076  | 14814 | 16.03 | 99.67 |
| scaffold00889 | 61636 | 64249 | 2614  | 4     | C_unshiu_00831 | 23982  | 26595  | 2614  | 2.09  | 100   |
| scaffold00890 | 4408  | 28691 | 24284 | 37.21 | C_unshiu_00035 | 567646 | 591995 | 24350 | 3.55  | 99.66 |
| scaffold00890 | 29216 | 65263 | 36048 | 55.23 | C_unshiu_00035 | 592919 | 628858 | 35940 | 5.23  | 99.29 |
| scaffold00891 | 6551  | 45229 | 38679 | 59.37 | C_unshiu_00796 | 20561  | 59157  | 38597 | 30    | 98.69 |
| scaffold00892 | 1507  | 3238  | 1732  | 2.66  | C_unshiu_01056 | 85962  | 84231  | 1732  | 1.74  | 100   |
| scaffold00892 | 3267  | 5175  | 1909  | 2.93  | C_unshiu_01156 | 54237  | 52351  | 1887  | 2.1   | 98.59 |
| scaffold00892 | 6907  | 11323 | 4417  | 6.78  | C_unshiu_01156 | 50257  | 45829  | 4429  | 4.93  | 99.37 |
| scaffold00892 | 11421 | 12449 | 1029  | 1.58  | C_unshiu_01156 | 45365  | 44338  | 1028  | 1.14  | 99.71 |
| scaffold00892 | 25226 | 27125 | 1900  | 2.92  | C_unshiu_00711 | 23210  | 21297  | 1914  | 1.34  | 98.9  |
| scaffold00892 | 37173 | 39120 | 1948  | 2.99  | C_unshiu_00711 | 18302  | 16356  | 1947  | 1.37  | 99.64 |
| scaffold00892 | 59875 | 62001 | 2127  | 3.27  | C_unshiu_03033 | 8579   | 10702  | 2124  | 17.7  | 98.68 |
| scaffold00893 | 1     | 1091  | 1091  | 1.68  | C_unshiu_01715 | 24333  | 25419  | 1087  | 2.09  | 99.54 |
| scaffold00893 | 5066  | 27095 | 22030 | 33.85 | C_unshiu_01715 | 29916  | 51901  | 21986 | 42.36 | 99.25 |
| scaffold00893 | 30502 | 44848 | 14347 | 22.04 | C_unshiu_02411 | 9818   | 24192  | 14375 | 53.09 | 98.33 |
| scaffold00893 | 49280 | 51186 | 1907  | 2.93  | C_unshiu_01094 | 10830  | 8924   | 1907  | 1.98  | 100   |
| scaffold00893 | 51545 | 56021 | 4477  | 6.88  | C_unshiu_01094 | 8739   | 4266   | 4474  | 4.64  | 99.69 |
| scaffold00893 | 56045 | 57356 | 1312  | 2.02  | C_unshiu_01094 | 3064   | 1759   | 1306  | 1.35  | 98.86 |
| scaffold00893 | 58917 | 61202 | 2286  | 3.51  | C_unshiu_01094 | 2286   | 1      | 2286  | 2.37  | 100   |
| scaffold00894 | 1     | 5426  | 5426  | 8.36  | C_unshiu_00160 | 6134   | 708    | 5427  | 1.46  | 99.83 |
| scaffold00894 | 11774 | 14082 | 2309  | 3.56  | C_unshiu_00020 | 617392 | 615061 | 2332  | 0.3   | 98.41 |
| scaffold00894 | 16950 | 21877 | 4928  | 7.59  | C_unshiu_00020 | 609696 | 604770 | 4927  | 0.63  | 99.27 |
| scaffold00894 | 23203 | 24627 | 1425  | 2.19  | C_unshiu_01182 | 7117   | 5680   | 1438  | 1.65  | 98.89 |
| scaffold00894 | 29549 | 53213 | 23665 | 36.44 | C_unshiu_01182 | 44080  | 20432  | 23649 | 27.12 | 99.55 |
| scaffold00894 | 53348 | 61939 | 8592  | 13.23 | C_unshiu_01182 | 20913  | 12330  | 8584  | 9.84  | 98.94 |
| scaffold00894 | 62571 | 64085 | 1515  | 2.33  | C_unshiu_00044 | 226244 | 224730 | 1515  | 0.24  | 100   |
| scaffold00895 | 1     | 1133  | 1133  | 1.75  | C_unshiu_01426 | 25819  | 26951  | 1133  | 1.65  | 100   |
| scaffold00895 | 1133  | 2782  | 1650  | 2.55  | C_unshiu_02819 | 1649   | 3294   | 1646  | 9.41  | 98.55 |
| scaffold00895 | 6062  | 7326  | 1265  | 1.95  | C_unshiu_02819 | 4737   | 6001   | 1265  | 7.23  | 99.68 |
| scaffold00895 | 6064  | 7326  | 1263  | 1.95  | C_unshiu_01598 | 24749  | 23485  | 1265  | 2.2   | 99.29 |
| scaffold00895 | 9710  | 17946 | 8237  | 12.72 | C_unshiu_01426 | 31638  | 39823  | 8186  | 11.94 | 98.56 |
| scaffold00895 | 20402 | 25284 | 4883  | 7.54  | C_unshiu_01426 | 42018  | 46900  | 4883  | 7.12  | 100   |
| scaffold00895 | 25677 | 29680 | 4004  | 6.18  | C_unshiu_01426 | 47815  | 51810  | 3996  | 5.83  | 99.3  |
| scaffold00895 | 33087 | 34275 | 1189  | 1.84  | C_unshiu_02092 | 36834  | 35647  | 1188  | 3.23  | 98.65 |
| scaffold00895 | 60139 | 64750 | 4612  | 7.12  | C_unshiu_02371 | 25918  | 21316  | 4603  | 16.53 | 99.59 |
| scaffold00896 | 2192  | 6725  | 4534  | 7     | C_unshiu_00730 | 120849 | 125383 | 4535  | 3.27  | 99.63 |
| scaffold00896 | 6758  | 8029  | 1272  | 1.96  | C_unshiu_00730 | 125751 | 127022 | 1272  | 0.92  | 98.9  |
| scaffold00896 | 21320 | 23485 | 2166  | 3.35  | C_unshiu_01141 | 38363  | 40530  | 2168  | 2.36  | 99.45 |
| scaffold00896 | 23499 | 24957 | 1459  | 2.25  | C_unshiu_01141 | 40926  | 42390  | 1465  | 1.6   | 98.57 |
| scaffold00896 | 27737 | 40199 | 12463 | 19.25 | C_unshiu_01141 | 44048  | 56592  | 12545 | 13.67 | 98.55 |
| scaffold00896 | 46342 | 53724 | 7383  | 11.4  | C_unshiu_01141 | 63050  | 70423  | 7374  | 8.03  | 98.03 |
| scaffold00897 | 15477 | 18446 | 2970  | 4.59  | C_unshiu_00030 | 442156 | 439214 | 2943  | 0.41  | 98.02 |
| scaffold00897 | 44287 | 50629 | 6343  | 9.8   | C_unshiu_00030 | 430850 | 424506 | 6345  | 0.89  | 98.98 |

|               |       |       |       |       |                |        |        |       |       |       |
|---------------|-------|-------|-------|-------|----------------|--------|--------|-------|-------|-------|
| scaffold00897 | 54540 | 59813 | 5274  | 8.15  | C_unshiu_00030 | 409498 | 404216 | 5283  | 0.74  | 98.73 |
| scaffold00897 | 60702 | 64725 | 4024  | 6.22  | C_unshiu_00030 | 402061 | 398038 | 4024  | 0.57  | 100   |
| scaffold00898 | 5948  | 23504 | 17557 | 27.14 | C_unshiu_00418 | 18950  | 1503   | 17448 | 7.95  | 98.66 |
| scaffold00898 | 37765 | 40541 | 2777  | 4.29  | C_unshiu_02476 | 24441  | 21664  | 2778  | 10.93 | 99.6  |
| scaffold00898 | 40715 | 43568 | 2854  | 4.41  | C_unshiu_02476 | 21340  | 18488  | 2853  | 11.23 | 99.68 |
| scaffold00898 | 43794 | 44855 | 1062  | 1.64  | C_unshiu_00418 | 85675  | 86732  | 1058  | 0.48  | 98.31 |
| scaffold00898 | 44849 | 49493 | 4645  | 7.18  | C_unshiu_02079 | 8674   | 13298  | 4625  | 12.39 | 99.42 |
| scaffold00898 | 54393 | 55487 | 1095  | 1.69  | C_unshiu_02079 | 17377  | 18471  | 1095  | 2.93  | 100   |
| scaffold00898 | 55842 | 58833 | 2992  | 4.62  | C_unshiu_02079 | 21754  | 24720  | 2967  | 7.95  | 98.1  |
| scaffold00899 | 1     | 14498 | 14498 | 22.44 | C_unshiu_01100 | 49084  | 34563  | 14522 | 15.12 | 99.71 |
| scaffold00899 | 28195 | 35362 | 7168  | 11.09 | C_unshiu_01409 | 62435  | 55240  | 7196  | 10.27 | 98.06 |
| scaffold00899 | 35345 | 55958 | 20614 | 31.91 | C_unshiu_01409 | 55171  | 34567  | 20605 | 29.4  | 99.49 |
| scaffold00899 | 55952 | 58712 | 2761  | 4.27  | C_unshiu_00463 | 102684 | 99924  | 2761  | 1.36  | 100   |
| scaffold00899 | 62031 | 63581 | 1551  | 2.4   | C_unshiu_01409 | 29971  | 28421  | 1551  | 2.21  | 99.68 |
| scaffold00900 | 1     | 1145  | 1145  | 1.78  | C_unshiu_00746 | 77391  | 76247  | 1145  | 0.84  | 99.83 |
| scaffold00900 | 15101 | 33314 | 18214 | 28.25 | C_unshiu_01174 | 47287  | 65509  | 18223 | 20.69 | 99.44 |
| scaffold00900 | 33332 | 34895 | 1564  | 2.43  | C_unshiu_01174 | 68192  | 69756  | 1565  | 1.78  | 99.74 |
| scaffold00900 | 36511 | 40178 | 3668  | 5.69  | C_unshiu_01286 | 35910  | 32243  | 3668  | 4.68  | 100   |
| scaffold00900 | 43871 | 47207 | 3337  | 5.18  | C_unshiu_01488 | 54346  | 57682  | 3337  | 5.23  | 99.34 |
| scaffold00900 | 57829 | 59656 | 1828  | 2.84  | C_unshiu_01286 | 24647  | 22820  | 1828  | 2.33  | 100   |
| scaffold00901 | 1987  | 10613 | 8627  | 13.38 | C_unshiu_00851 | 122530 | 113903 | 8628  | 7.04  | 99.68 |
| scaffold00901 | 30830 | 32920 | 2091  | 3.24  | C_unshiu_00084 | 105543 | 103453 | 2091  | 0.44  | 100   |
| scaffold00901 | 38559 | 63975 | 25417 | 39.42 | C_unshiu_01123 | 26179  | 897    | 25283 | 26.97 | 98.26 |
| scaffold00902 | 6     | 16624 | 16619 | 25.81 | C_unshiu_01258 | 9352   | 25965  | 16614 | 20.72 | 99.93 |
| scaffold00902 | 16823 | 39097 | 22275 | 34.6  | C_unshiu_01258 | 26533  | 48807  | 22275 | 27.78 | 99.99 |
| scaffold00902 | 46418 | 61913 | 15496 | 24.07 | C_unshiu_01258 | 55253  | 70754  | 15502 | 19.33 | 99.9  |
| scaffold00903 | 1487  | 7243  | 5757  | 8.95  | C_unshiu_00245 | 210680 | 216443 | 5764  | 1.93  | 99.62 |
| scaffold00903 | 7913  | 18244 | 10332 | 16.06 | C_unshiu_00245 | 217019 | 227265 | 10247 | 3.42  | 98.33 |
| scaffold00903 | 18829 | 20162 | 1334  | 2.07  | C_unshiu_00147 | 6328   | 4996   | 1333  | 0.34  | 99.93 |
| scaffold00903 | 21395 | 29328 | 7934  | 12.33 | C_unshiu_00245 | 228915 | 236851 | 7937  | 2.65  | 99.22 |
| scaffold00903 | 29542 | 31482 | 1941  | 3.02  | C_unshiu_00245 | 238772 | 236840 | 1933  | 0.65  | 98.66 |
| scaffold00903 | 33540 | 38272 | 4733  | 7.36  | C_unshiu_00245 | 240337 | 245069 | 4733  | 1.58  | 99.92 |
| scaffold00903 | 38560 | 48067 | 9508  | 14.78 | C_unshiu_00245 | 245901 | 255390 | 9490  | 3.17  | 99.61 |
| scaffold00903 | 48111 | 51831 | 3721  | 5.78  | C_unshiu_00245 | 255930 | 259650 | 3721  | 1.24  | 100   |
| scaffold00903 | 53464 | 55867 | 2404  | 3.74  | C_unshiu_00245 | 261792 | 264195 | 2404  | 0.8   | 99.83 |
| scaffold00903 | 56007 | 59440 | 3434  | 5.34  | C_unshiu_00245 | 264338 | 267774 | 3437  | 1.15  | 99.74 |
| scaffold00903 | 59494 | 60895 | 1402  | 2.18  | C_unshiu_00245 | 267950 | 269351 | 1402  | 0.47  | 100   |
| scaffold00903 | 61736 | 63451 | 1716  | 2.67  | C_unshiu_00355 | 217991 | 219706 | 1716  | 0.72  | 100   |
| scaffold00904 | 8141  | 10009 | 1869  | 2.91  | C_unshiu_02222 | 28587  | 30455  | 1869  | 5.75  | 99.3  |
| scaffold00905 | 657   | 1665  | 1009  | 1.58  | C_unshiu_00335 | 3274   | 4282   | 1009  | 0.4   | 99.6  |
| scaffold00905 | 1675  | 3022  | 1348  | 2.11  | C_unshiu_00175 | 24993  | 26337  | 1345  | 0.37  | 99.04 |
| scaffold00905 | 7554  | 14762 | 7209  | 11.27 | C_unshiu_00335 | 11919  | 19118  | 7200  | 2.87  | 98.22 |
| scaffold00905 | 15359 | 21318 | 5960  | 9.32  | C_unshiu_00031 | 5960   | 1      | 5960  | 0.84  | 100   |
| scaffold00905 | 23759 | 39813 | 16055 | 25.11 | C_unshiu_00708 | 38517  | 54548  | 16032 | 11.22 | 99.85 |
| scaffold00905 | 39837 | 41110 | 1274  | 1.99  | C_unshiu_00708 | 55470  | 56743  | 1274  | 0.89  | 99.29 |
| scaffold00905 | 40973 | 42466 | 1494  | 2.34  | C_unshiu_00708 | 56674  | 58157  | 1484  | 1.04  | 98.93 |
| scaffold00905 | 57739 | 59823 | 2085  | 3.26  | C_unshiu_00708 | 71766  | 73849  | 2084  | 1.46  | 99.62 |
| scaffold00906 | 7070  | 10156 | 3087  | 4.82  | C_unshiu_00050 | 231784 | 234862 | 3079  | 0.51  | 99.32 |
| scaffold00906 | 10151 | 13269 | 3119  | 4.87  | C_unshiu_02016 | 22996  | 19878  | 3119  | 7.78  | 100   |
| scaffold00906 | 16335 | 36502 | 20168 | 31.52 | C_unshiu_00050 | 241407 | 261576 | 20170 | 3.35  | 99.69 |
| scaffold00907 | 4553  | 21153 | 16601 | 26.03 | C_unshiu_02016 | 16598  | 1      | 16598 | 41.39 | 99.22 |
| scaffold00907 | 20395 | 32897 | 12503 | 19.6  | C_unshiu_00294 | 37293  | 24796  | 12498 | 4.64  | 99    |
| scaffold00907 | 33009 | 35600 | 2592  | 4.06  | C_unshiu_00995 | 73090  | 75676  | 2587  | 2.42  | 99.77 |
| scaffold00907 | 35717 | 46960 | 11244 | 17.63 | C_unshiu_00995 | 75798  | 87042  | 11245 | 10.53 | 99.98 |
| scaffold00908 | 4714  | 8020  | 3307  | 5.2   | C_unshiu_01892 | 15182  | 18488  | 3307  | 7.35  | 99.94 |
| scaffold00908 | 12288 | 14820 | 2533  | 3.99  | C_unshiu_01892 | 21663  | 24196  | 2534  | 5.63  | 99.76 |
| scaffold00908 | 15339 | 18574 | 3236  | 5.09  | C_unshiu_00239 | 161259 | 164493 | 3235  | 1.07  | 98.89 |
| scaffold00908 | 18589 | 31319 | 12731 | 20.03 | C_unshiu_00239 | 165606 | 178354 | 12749 | 4.21  | 99.76 |
| scaffold00908 | 37088 | 38286 | 1199  | 1.89  | C_unshiu_01258 | 50833  | 49635  | 1199  | 1.5   | 100   |
| scaffold00908 | 38280 | 43713 | 5434  | 8.55  | C_unshiu_00239 | 183806 | 189239 | 5434  | 1.79  | 99.94 |
| scaffold00908 | 43732 | 45040 | 1309  | 2.06  | C_unshiu_00239 | 194046 | 195354 | 1309  | 0.43  | 100   |
| scaffold00908 | 44726 | 54523 | 9798  | 15.42 | C_unshiu_00151 | 1      | 9798   | 9798  | 2.54  | 99.83 |
| scaffold00908 | 54636 | 59631 | 4996  | 7.86  | C_unshiu_00151 | 10280  | 15275  | 4996  | 1.3   | 99.38 |
| scaffold00908 | 60464 | 63553 | 3090  | 4.86  | C_unshiu_00151 | 16672  | 19746  | 3075  | 0.8   | 98.39 |
| scaffold00909 | 346   | 2406  | 2061  | 3.24  | C_unshiu_02219 | 32664  | 30605  | 2060  | 6.31  | 99.66 |
| scaffold00909 | 2453  | 7682  | 5230  | 8.23  | C_unshiu_02219 | 30699  | 25470  | 5230  | 16.01 | 100   |
| scaffold00909 | 12196 | 15028 | 2833  | 4.46  | C_unshiu_01598 | 31922  | 34745  | 2824  | 4.91  | 98.77 |
| scaffold00909 | 15029 | 16130 | 1102  | 1.73  | C_unshiu_01598 | 34943  | 36051  | 1109  | 1.93  | 98.56 |
| scaffold00909 | 16878 | 17905 | 1028  | 1.62  | C_unshiu_00448 | 39470  | 38443  | 1028  | 0.49  | 100   |
| scaffold00909 | 18971 | 20309 | 1339  | 2.11  | C_unshiu_01598 | 40493  | 41831  | 1339  | 2.33  | 99.85 |
| scaffold00909 | 22114 | 25985 | 3872  | 6.09  | C_unshiu_01598 | 42792  | 46657  | 3866  | 6.72  | 99.02 |
| scaffold00909 | 38457 | 41650 | 3194  | 5.02  | C_unshiu_01598 | 54354  | 57547  | 3194  | 5.55  | 100   |
| scaffold00909 | 46216 | 48551 | 2336  | 3.67  | C_unshiu_00736 | 4901   | 7242   | 2342  | 1.7   | 99.53 |
| scaffold00909 | 52391 | 54053 | 1663  | 2.62  | C_unshiu_00736 | 9898   | 11560  | 1663  | 1.2   | 99.28 |
| scaffold00909 | 54079 | 55687 | 1609  | 2.53  | C_unshiu_02819 | 12364  | 10751  | 1614  | 9.23  | 99.57 |
| scaffold00909 | 61223 | 62338 | 1116  | 1.76  | C_unshiu_01598 | 17669  | 16554  | 1116  | 1.94  | 99.91 |
| scaffold00909 | 62337 | 63575 | 1239  | 1.95  | C_unshiu_02819 | 2845   | 4084   | 1240  | 7.09  | 99.27 |
| scaffold00910 | 1     | 2075  | 2075  | 3.27  | C_unshiu_00689 | 87901  | 89960  | 2060  | 1.41  | 98.32 |
| scaffold00910 | 11077 | 12709 | 1633  | 2.58  | C_unshiu_00790 | 103245 | 104877 | 1633  | 1.26  | 99.45 |

|               |       |       |       |       |                |        |        |       |       |       |
|---------------|-------|-------|-------|-------|----------------|--------|--------|-------|-------|-------|
| scaffold00910 | 13372 | 15238 | 1867  | 2.94  | C_unshiu_00790 | 105713 | 107568 | 1856  | 1.43  | 98.82 |
| scaffold00910 | 23419 | 25573 | 2155  | 3.4   | C_unshiu_01265 | 56874  | 54720  | 2155  | 2.7   | 100   |
| scaffold00910 | 40854 | 55160 | 14307 | 22.57 | C_unshiu_00790 | 71910  | 86220  | 14311 | 11.02 | 99.66 |
| scaffold00910 | 55161 | 58491 | 3331  | 5.25  | C_unshiu_00123 | 72867  | 69537  | 3331  | 0.79  | 100   |
| scaffold00910 | 58485 | 59685 | 1201  | 1.89  | C_unshiu_01790 | 1019   | 2221   | 1203  | 2.46  | 99.58 |
| scaffold00911 | 1     | 26827 | 26827 | 42.34 | C_unshiu_00230 | 21524  | 48348  | 26825 | 8.67  | 99.68 |
| scaffold00911 | 17859 | 56778 | 38920 | 61.43 | C_unshiu_00230 | 58212  | 97135  | 38924 | 12.58 | 99.92 |
| scaffold00911 | 50289 | 63359 | 13071 | 20.63 | C_unshiu_00941 | 38037  | 51114  | 13078 | 11.65 | 99.94 |
| scaffold00912 | 11578 | 15613 | 4036  | 6.37  | C_unshiu_01931 | 39645  | 35619  | 4027  | 9.26  | 99.11 |
| scaffold00912 | 24250 | 44332 | 20083 | 31.7  | C_unshiu_00588 | 160803 | 140691 | 20113 | 11.84 | 98.01 |
| scaffold00912 | 44750 | 56241 | 11492 | 18.14 | C_unshiu_00588 | 140691 | 129172 | 11520 | 6.78  | 98.34 |
| scaffold00912 | 58429 | 60066 | 1638  | 2.59  | C_unshiu_00588 | 128556 | 126919 | 1638  | 0.96  | 100   |
| scaffold00912 | 60490 | 62684 | 2195  | 3.47  | C_unshiu_00588 | 126018 | 123824 | 2195  | 1.29  | 98.41 |
| scaffold00913 | 4     | 17012 | 17009 | 26.86 | C_unshiu_00284 | 36243  | 19295  | 16949 | 6.17  | 99.5  |
| scaffold00913 | 17121 | 31455 | 14335 | 22.64 | C_unshiu_00284 | 19295  | 5006   | 14290 | 5.2   | 99.06 |
| scaffold00913 | 42319 | 43493 | 1175  | 1.86  | C_unshiu_00473 | 90313  | 89139  | 1175  | 0.58  | 100   |
| scaffold00913 | 43492 | 45234 | 1743  | 2.75  | C_unshiu_01722 | 48472  | 46730  | 1743  | 3.37  | 99.89 |
| scaffold00913 | 50284 | 63325 | 13042 | 20.6  | C_unshiu_01722 | 40882  | 27843  | 13040 | 25.18 | 99.98 |
| scaffold00914 | 2528  | 5491  | 2964  | 4.68  | C_unshiu_02807 | 3786   | 824    | 2963  | 16.71 | 99.8  |
| scaffold00915 | 3931  | 6548  | 2618  | 4.14  | C_unshiu_01587 | 16311  | 13665  | 2647  | 4.54  | 98.64 |
| scaffold00915 | 10766 | 12877 | 2112  | 3.34  | C_unshiu_01587 | 9658   | 7551   | 2108  | 3.61  | 99.06 |
| scaffold00915 | 16999 | 20975 | 3977  | 6.29  | C_unshiu_01587 | 4583   | 602    | 3982  | 6.83  | 99.35 |
| scaffold00915 | 24626 | 35984 | 11359 | 17.96 | C_unshiu_00575 | 1      | 11360  | 11360 | 6.59  | 99.97 |
| scaffold00915 | 40480 | 42131 | 1652  | 2.61  | C_unshiu_00575 | 14677  | 16328  | 1652  | 0.96  | 100   |
| scaffold00915 | 49857 | 52623 | 2767  | 4.37  | C_unshiu_00787 | 120256 | 123016 | 2761  | 2.12  | 99.06 |
| scaffold00915 | 61146 | 62616 | 1471  | 2.33  | C_unshiu_02962 | 3082   | 4553   | 1472  | 10.47 | 99.59 |
| scaffold00916 | 10177 | 31761 | 21585 | 34.27 | C_unshiu_02406 | 4804   | 26335  | 21532 | 79.22 | 99.68 |
| scaffold00916 | 41876 | 47354 | 5479  | 8.7   | C_unshiu_01031 | 79025  | 73547  | 5479  | 5.32  | 100   |
| scaffold00916 | 47346 | 54669 | 7324  | 11.63 | C_unshiu_02338 | 24967  | 17645  | 7323  | 25.51 | 99.99 |
| scaffold00916 | 61445 | 62982 | 1538  | 2.44  | C_unshiu_02338 | 11050  | 9513   | 1538  | 5.36  | 100   |
| scaffold00917 | 1063  | 8444  | 7382  | 11.75 | C_unshiu_01109 | 113    | 7473   | 7361  | 7.73  | 99.07 |
| scaffold00917 | 13189 | 62848 | 49660 | 79.02 | C_unshiu_01109 | 11722  | 61395  | 49674 | 52.14 | 99.87 |
| scaffold00918 | 1978  | 42818 | 40841 | 65.02 | C_unshiu_00381 | 229050 | 188257 | 40794 | 17.81 | 99.78 |
| scaffold00918 | 22824 | 49335 | 26512 | 42.21 | C_unshiu_00381 | 208258 | 181740 | 26519 | 11.58 | 99.97 |
| scaffold00918 | 49379 | 54045 | 4667  | 7.43  | C_unshiu_00381 | 181838 | 177172 | 4667  | 2.04  | 99.96 |
| scaffold00918 | 58303 | 61636 | 3334  | 5.31  | C_unshiu_00381 | 173533 | 170201 | 3333  | 1.46  | 99.97 |
| scaffold00919 | 34449 | 43461 | 9013  | 14.37 | C_unshiu_00674 | 118891 | 127916 | 9026  | 6.01  | 99.4  |
| scaffold00919 | 42540 | 52214 | 9675  | 15.43 | C_unshiu_00011 | 944990 | 935316 | 9675  | 1     | 99.84 |
| scaffold00920 | 9     | 2124  | 2116  | 3.38  | C_unshiu_01010 | 11548  | 13665  | 2118  | 2.02  | 99.72 |
| scaffold00920 | 2492  | 11032 | 8541  | 13.64 | C_unshiu_01010 | 14380  | 22940  | 8561  | 8.16  | 99.56 |
| scaffold00920 | 17804 | 18851 | 1048  | 1.67  | C_unshiu_00421 | 53566  | 52517  | 1050  | 0.48  | 98.86 |
| scaffold00920 | 24134 | 25443 | 1310  | 2.09  | C_unshiu_01010 | 35922  | 37221  | 1300  | 1.24  | 99.01 |
| scaffold00920 | 35797 | 40553 | 4757  | 7.6   | C_unshiu_01010 | 38799  | 43557  | 4759  | 4.54  | 99.89 |
| scaffold00920 | 44673 | 55617 | 10945 | 17.48 | C_unshiu_00415 | 168772 | 157844 | 10929 | 4.96  | 99.54 |
| scaffold00920 | 57845 | 59884 | 2040  | 3.26  | C_unshiu_00631 | 125884 | 127923 | 2040  | 1.27  | 99.66 |
| scaffold00920 | 60572 | 62612 | 2041  | 3.26  | C_unshiu_00415 | 152785 | 150747 | 2039  | 0.92  | 99.36 |
| scaffold00921 | 4     | 2176  | 2173  | 3.49  | C_unshiu_01063 | 2204   | 4377   | 2174  | 2.2   | 98.27 |
| scaffold00921 | 11215 | 13197 | 1983  | 3.18  | C_unshiu_01063 | 13408  | 15390  | 1983  | 2     | 99.7  |
| scaffold00921 | 13195 | 19272 | 6078  | 9.75  | C_unshiu_01063 | 15565  | 21642  | 6078  | 6.14  | 100   |
| scaffold00921 | 19302 | 62327 | 43026 | 69.03 | C_unshiu_01063 | 21925  | 64939  | 43015 | 43.45 | 99.93 |
| scaffold00922 | 12643 | 22627 | 9985  | 16.13 | C_unshiu_00057 | 568446 | 578433 | 9988  | 1.69  | 98.85 |
| scaffold00922 | 31113 | 36376 | 5264  | 8.51  | C_unshiu_00057 | 584764 | 590027 | 5264  | 0.89  | 100   |
| scaffold00922 | 55357 | 61890 | 6534  | 10.56 | C_unshiu_01562 | 890    | 7367   | 6478  | 10.84 | 99.08 |
| scaffold00923 | 1     | 8215  | 8215  | 13.35 | C_unshiu_01199 | 4674   | 12861  | 8188  | 9.55  | 99.53 |
| scaffold00923 | 9061  | 10199 | 1139  | 1.85  | C_unshiu_01199 | 13682  | 14821  | 1140  | 1.33  | 98.16 |
| scaffold00923 | 11908 | 17229 | 5322  | 8.65  | C_unshiu_01199 | 15395  | 20716  | 5322  | 6.2   | 99.91 |
| scaffold00923 | 29565 | 30902 | 1338  | 2.18  | C_unshiu_01827 | 46569  | 45232  | 1338  | 2.82  | 100   |
| scaffold00923 | 34773 | 35876 | 1104  | 1.79  | C_unshiu_02791 | 16602  | 15499  | 1104  | 6.1   | 100   |
| scaffold00923 | 39085 | 40785 | 1701  | 2.77  | C_unshiu_03072 | 1894   | 3596   | 1703  | 16.21 | 98.65 |
| scaffold00923 | 44037 | 49877 | 5841  | 9.5   | C_unshiu_03072 | 4671   | 10506  | 5836  | 55.53 | 98.75 |
| scaffold00923 | 58400 | 59482 | 1083  | 1.76  | C_unshiu_00338 | 199231 | 198147 | 1085  | 0.43  | 99.35 |
| scaffold00924 | 3360  | 4394  | 1035  | 1.68  | C_unshiu_01003 | 6878   | 5844   | 1035  | 0.98  | 98.45 |
| scaffold00924 | 5324  | 7025  | 1702  | 2.77  | C_unshiu_01003 | 3901   | 2202   | 1700  | 1.61  | 98.18 |
| scaffold00924 | 7033  | 8091  | 1059  | 1.72  | C_unshiu_01003 | 6309   | 5251   | 1059  | 1     | 100   |
| scaffold00924 | 12262 | 13918 | 1657  | 2.7   | C_unshiu_01003 | 1888   | 221    | 1668  | 1.58  | 99.22 |
| scaffold00924 | 19621 | 21739 | 2119  | 3.45  | C_unshiu_00859 | 98349  | 100468 | 2120  | 1.74  | 99.86 |
| scaffold00924 | 24468 | 28918 | 4451  | 7.24  | C_unshiu_00859 | 102807 | 107256 | 4450  | 3.65  | 99.8  |
| scaffold00924 | 33936 | 41077 | 7142  | 11.62 | C_unshiu_00859 | 112488 | 119630 | 7143  | 5.87  | 99.78 |
| scaffold00924 | 43393 | 61075 | 17683 | 28.76 | C_unshiu_01071 | 19587  | 37253  | 17667 | 17.9  | 99.6  |
| scaffold00925 | 1     | 1536  | 1536  | 2.5   | C_unshiu_00815 | 115794 | 117329 | 1536  | 1.21  | 100   |
| scaffold00925 | 2938  | 9026  | 6089  | 9.91  | C_unshiu_00815 | 119069 | 125110 | 6042  | 4.75  | 99.21 |
| scaffold00925 | 18112 | 23269 | 5158  | 8.4   | C_unshiu_01210 | 68601  | 63444  | 5158  | 6.12  | 100   |
| scaffold00925 | 24854 | 37089 | 12236 | 19.92 | C_unshiu_01210 | 61248  | 49048  | 12201 | 14.48 | 99.62 |
| scaffold00925 | 37081 | 39558 | 2478  | 4.03  | C_unshiu_01697 | 31337  | 28860  | 2478  | 4.71  | 100   |
| scaffold00925 | 44332 | 48344 | 4013  | 6.53  | C_unshiu_01210 | 42377  | 38387  | 3991  | 4.74  | 99.43 |
| scaffold00925 | 48728 | 60308 | 11581 | 18.85 | C_unshiu_01210 | 37283  | 25703  | 11581 | 13.74 | 100   |
| scaffold00925 | 60316 | 61441 | 1126  | 1.83  | C_unshiu_01210 | 25495  | 24370  | 1126  | 1.34  | 100   |
| scaffold00926 | 25613 | 31501 | 5889  | 9.59  | C_unshiu_00640 | 35965  | 30108  | 5858  | 3.7   | 98.71 |
| scaffold00926 | 31845 | 61323 | 29479 | 47.99 | C_unshiu_00640 | 29451  | 1      | 29451 | 18.6  | 99.87 |

|               |       |       |       |       |                |         |         |       |       |       |
|---------------|-------|-------|-------|-------|----------------|---------|---------|-------|-------|-------|
| scaffold00927 | 1     | 2033  | 2033  | 3.32  | C_unshiu_00661 | 141532  | 143567  | 2036  | 1.33  | 99.41 |
| scaffold00927 | 4693  | 11831 | 7139  | 11.64 | C_unshiu_00661 | 145685  | 152807  | 7123  | 4.64  | 98.02 |
| scaffold00927 | 39152 | 48193 | 9042  | 14.75 | C_unshiu_03059 | 222     | 9273    | 9052  | 81.07 | 98.92 |
| scaffold00927 | 49005 | 50907 | 1903  | 3.1   | C_unshiu_03059 | 9275    | 11166   | 1892  | 16.94 | 98.01 |
| scaffold00927 | 50889 | 51946 | 1058  | 1.73  | C_unshiu_01916 | 43048   | 44105   | 1058  | 2.4   | 99.81 |
| scaffold00927 | 51059 | 61321 | 10263 | 16.74 | C_unshiu_01916 | 43052   | 32791   | 10262 | 23.27 | 99.77 |
| scaffold00928 | 7223  | 11629 | 4407  | 7.25  | C_unshiu_02335 | 14876   | 10452   | 4425  | 15.37 | 98.44 |
| scaffold00928 | 11713 | 17561 | 5849  | 9.62  | C_unshiu_01519 | 61708   | 55808   | 5901  | 9.47  | 98.68 |
| scaffold00928 | 17578 | 19343 | 1766  | 2.9   | C_unshiu_02335 | 3132    | 1354    | 1779  | 6.18  | 98.71 |
| scaffold00928 | 19366 | 34035 | 14670 | 24.12 | C_unshiu_01519 | 52392   | 37669   | 14724 | 23.63 | 98.95 |
| scaffold00928 | 36285 | 45429 | 9145  | 15.03 | C_unshiu_01519 | 36148   | 27006   | 9143  | 14.67 | 99.22 |
| scaffold00928 | 50339 | 56725 | 6387  | 10.5  | C_unshiu_01519 | 21358   | 14989   | 6370  | 10.22 | 98.86 |
| scaffold00929 | 1     | 1473  | 1473  | 2.42  | C_unshiu_00220 | 143732  | 142260  | 1473  | 0.47  | 98.51 |
| scaffold00929 | 13377 | 14589 | 1213  | 2     | C_unshiu_00220 | 131368  | 130155  | 1214  | 0.39  | 99.75 |
| scaffold00929 | 15216 | 30776 | 15561 | 25.6  | C_unshiu_01161 | 57372   | 72849   | 15478 | 17.24 | 98.83 |
| scaffold00929 | 35009 | 37651 | 2643  | 4.35  | C_unshiu_02565 | 10164   | 7522    | 2643  | 11.5  | 100   |
| scaffold00929 | 37650 | 42135 | 4486  | 7.38  | C_unshiu_02565 | 7161    | 2676    | 4486  | 19.52 | 100   |
| scaffold00929 | 43073 | 44458 | 1386  | 2.28  | C_unshiu_02565 | 1386    | 1       | 1386  | 6.03  | 100   |
| scaffold00930 | 13516 | 17895 | 4380  | 7.21  | C_unshiu_00765 | 118488  | 114106  | 4383  | 3.27  | 99.36 |
| scaffold00930 | 18121 | 20149 | 2029  | 3.34  | C_unshiu_00765 | 113441  | 111409  | 2033  | 1.52  | 99.36 |
| scaffold00930 | 21415 | 24954 | 3540  | 5.83  | C_unshiu_00765 | 109593  | 106055  | 3539  | 2.64  | 99.18 |
| scaffold00930 | 25028 | 26245 | 1218  | 2.01  | C_unshiu_00765 | 106126  | 104908  | 1219  | 0.91  | 99.18 |
| scaffold00930 | 26260 | 30099 | 3840  | 6.32  | C_unshiu_00765 | 104479  | 100650  | 3830  | 2.86  | 98.96 |
| scaffold00930 | 34533 | 36300 | 1768  | 2.91  | C_unshiu_00765 | 96884   | 95116   | 1769  | 1.32  | 98.87 |
| scaffold00930 | 44240 | 46879 | 2640  | 4.35  | C_unshiu_00231 | 125078  | 122439  | 2640  | 0.86  | 100   |
| scaffold00931 | 1     | 1119  | 1119  | 1.84  | C_unshiu_01061 | 76564   | 77684   | 1121  | 1.13  | 99.11 |
| scaffold00931 | 1950  | 3975  | 2026  | 3.34  | C_unshiu_01061 | 78386   | 80412   | 2027  | 2.05  | 99.75 |
| scaffold00931 | 4993  | 6158  | 1166  | 1.92  | C_unshiu_01061 | 82049   | 83220   | 1172  | 1.18  | 99.23 |
| scaffold00931 | 7308  | 9163  | 1856  | 3.06  | C_unshiu_01061 | 85788   | 87647   | 1860  | 1.88  | 99.68 |
| scaffold00931 | 13311 | 17558 | 4248  | 7     | C_unshiu_01061 | 89671   | 93921   | 4251  | 4.29  | 99.84 |
| scaffold00931 | 17553 | 19317 | 1765  | 2.91  | C_unshiu_00527 | 13419   | 11655   | 1765  | 0.96  | 100   |
| scaffold00931 | 21587 | 33437 | 11851 | 19.53 | C_unshiu_00702 | 16808   | 4899    | 11910 | 8.3   | 98.99 |
| scaffold00931 | 33755 | 41811 | 8057  | 13.28 | C_unshiu_02908 | 1       | 8031    | 8031  | 51.64 | 99.24 |
| scaffold00931 | 38057 | 48982 | 10926 | 18.01 | C_unshiu_00004 | 1174043 | 1163129 | 10915 | 0.93  | 98.82 |
| scaffold00931 | 48400 | 50514 | 2115  | 3.49  | C_unshiu_01438 | 65794   | 63678   | 2117  | 3.13  | 98.21 |
| scaffold00931 | 52388 | 58071 | 5684  | 9.37  | C_unshiu_02066 | 1790    | 7444    | 5655  | 14.84 | 98.6  |
| scaffold00932 | 5956  | 18479 | 12524 | 20.67 | C_unshiu_00707 | 43565   | 31035   | 12531 | 8.77  | 99.61 |
| scaffold00932 | 22430 | 24267 | 1838  | 3.03  | C_unshiu_00151 | 354253  | 352416  | 1838  | 0.48  | 100   |
| scaffold00932 | 26288 | 27555 | 1268  | 2.09  | C_unshiu_00151 | 349882  | 348615  | 1268  | 0.33  | 99.37 |
| scaffold00932 | 30962 | 32522 | 1561  | 2.58  | C_unshiu_00707 | 26836   | 25277   | 1560  | 1.09  | 99.68 |
| scaffold00932 | 32541 | 34016 | 1476  | 2.44  | C_unshiu_00810 | 113858  | 115333  | 1476  | 1.16  | 100   |
| scaffold00932 | 37470 | 45640 | 8171  | 13.48 | C_unshiu_00810 | 119150  | 127319  | 8170  | 6.42  | 99.58 |
| scaffold00932 | 49387 | 53870 | 4484  | 7.4   | C_unshiu_01402 | 1       | 4484    | 4484  | 6.38  | 100   |
| scaffold00932 | 58184 | 60599 | 2416  | 3.99  | C_unshiu_01402 | 8206    | 10621   | 2416  | 3.44  | 99.96 |
| scaffold00933 | 1     | 1624  | 1624  | 2.69  | C_unshiu_02901 | 1624    | 1       | 1624  | 10.33 | 100   |
| scaffold00933 | 12080 | 26153 | 14074 | 23.33 | C_unshiu_01563 | 16856   | 2779    | 14078 | 23.63 | 99.23 |
| scaffold00933 | 27052 | 28611 | 1560  | 2.59  | C_unshiu_01563 | 1561    | 1       | 1561  | 2.62  | 99.55 |
| scaffold00933 | 30940 | 33462 | 2523  | 4.18  | C_unshiu_00246 | 298877  | 296355  | 2523  | 0.84  | 98.77 |
| scaffold00933 | 37021 | 58477 | 21457 | 35.57 | C_unshiu_01019 | 98083   | 76630   | 21454 | 20.63 | 99.94 |
| scaffold00934 | 815   | 2487  | 1673  | 2.77  | C_unshiu_01355 | 35500   | 33825   | 1676  | 2.27  | 98.15 |
| scaffold00934 | 8470  | 11222 | 2753  | 4.57  | C_unshiu_01355 | 27856   | 25129   | 2728  | 3.7   | 98.01 |
| scaffold00934 | 11222 | 29455 | 18234 | 30.24 | C_unshiu_01355 | 24973   | 6823    | 18151 | 24.59 | 98.18 |
| scaffold00935 | 1299  | 14035 | 12737 | 21.15 | C_unshiu_00465 | 6147    | 18905   | 12759 | 6.28  | 99.76 |
| scaffold00935 | 18975 | 20765 | 1791  | 2.97  | C_unshiu_00465 | 23746   | 25538   | 1793  | 0.88  | 99.78 |
| scaffold00935 | 21111 | 22313 | 1203  | 2     | C_unshiu_00465 | 26231   | 27433   | 1203  | 0.59  | 99.75 |
| scaffold00935 | 22308 | 31275 | 8968  | 14.89 | C_unshiu_00465 | 28106   | 37075   | 8970  | 4.42  | 99.77 |
| scaffold00935 | 31600 | 36785 | 5186  | 8.61  | C_unshiu_00465 | 37788   | 43022   | 5235  | 2.58  | 98.23 |
| scaffold00935 | 38254 | 49786 | 11533 | 19.15 | C_unshiu_00465 | 45181   | 56715   | 11535 | 5.68  | 99.9  |
| scaffold00935 | 53680 | 57184 | 3505  | 5.82  | C_unshiu_00465 | 60468   | 63974   | 3507  | 1.73  | 99.77 |
| scaffold00935 | 58707 | 60234 | 1528  | 2.54  | C_unshiu_00465 | 63974   | 65497   | 1524  | 0.75  | 99.74 |
| scaffold00936 | 1     | 1689  | 1689  | 2.81  | C_unshiu_00198 | 2178    | 3866    | 1689  | 0.5   | 100   |
| scaffold00936 | 8181  | 11245 | 3065  | 5.1   | C_unshiu_00074 | 114459  | 117523  | 3065  | 0.6   | 100   |
| scaffold00936 | 11240 | 36500 | 25261 | 42.01 | C_unshiu_00198 | 4894    | 30242   | 25349 | 7.53  | 98.28 |
| scaffold00937 | 1     | 1085  | 1085  | 1.81  | C_unshiu_01349 | 9602    | 10686   | 1085  | 1.46  | 99.82 |
| scaffold00937 | 10988 | 13432 | 2445  | 4.07  | C_unshiu_01349 | 16430   | 18869   | 2440  | 3.29  | 98.29 |
| scaffold00937 | 13737 | 14972 | 1236  | 2.06  | C_unshiu_01349 | 19347   | 20583   | 1237  | 1.67  | 99.92 |
| scaffold00937 | 19664 | 22691 | 3028  | 5.04  | C_unshiu_01349 | 24554   | 27561   | 3008  | 4.06  | 98.91 |
| scaffold00937 | 22825 | 26866 | 4042  | 6.73  | C_unshiu_01349 | 27965   | 32018   | 4054  | 5.47  | 99.51 |
| scaffold00937 | 23082 | 26866 | 3785  | 6.3   | C_unshiu_01223 | 22691   | 18895   | 3797  | 4.56  | 99.39 |
| scaffold00937 | 36698 | 38712 | 2015  | 3.35  | C_unshiu_01223 | 11442   | 9427    | 2016  | 2.42  | 99.31 |
| scaffold00937 | 40488 | 41742 | 1255  | 2.09  | C_unshiu_01349 | 17972   | 19227   | 1256  | 1.69  | 98.41 |
| scaffold00937 | 58129 | 59333 | 1205  | 2.01  | C_unshiu_00810 | 27104   | 28310   | 1207  | 0.95  | 98.34 |
| scaffold00938 | 1     | 28729 | 28729 | 48.1  | C_unshiu_00011 | 931838  | 902968  | 28871 | 2.99  | 98.08 |
| scaffold00938 | 28729 | 29964 | 1236  | 2.07  | C_unshiu_01239 | 2208    | 973     | 1236  | 1.51  | 98.38 |
| scaffold00938 | 31217 | 32942 | 1726  | 2.89  | C_unshiu_00610 | 8232    | 9959    | 1728  | 1.05  | 99.83 |
| scaffold00938 | 33089 | 35306 | 2218  | 3.71  | C_unshiu_00610 | 10164   | 12387   | 2224  | 1.35  | 98.57 |
| scaffold00938 | 35757 | 40689 | 4933  | 8.26  | C_unshiu_00610 | 13500   | 18432   | 4933  | 2.99  | 99.88 |
| scaffold00938 | 41033 | 57330 | 16298 | 27.29 | C_unshiu_00610 | 18729   | 35025   | 16297 | 9.88  | 99.99 |
| scaffold00939 | 1     | 5386  | 5386  | 9.03  | C_unshiu_00435 | 44808   | 50192   | 5385  | 2.52  | 99.78 |

|               |       |       |       |       |                |        |        |       |       |       |
|---------------|-------|-------|-------|-------|----------------|--------|--------|-------|-------|-------|
| scaffold00939 | 5492  | 7800  | 2309  | 3.87  | C_unshiu_00435 | 50477  | 52785  | 2309  | 1.08  | 99.65 |
| scaffold00939 | 13148 | 26411 | 13264 | 22.24 | C_unshiu_00435 | 57659  | 70926  | 13268 | 6.21  | 99.68 |
| scaffold00939 | 26574 | 37969 | 11396 | 19.11 | C_unshiu_00435 | 71432  | 82832  | 11401 | 5.33  | 99.43 |
| scaffold00939 | 37986 | 43976 | 5991  | 10.05 | C_unshiu_00435 | 83217  | 89207  | 5991  | 2.8   | 100   |
| scaffold00939 | 45628 | 57576 | 11949 | 20.04 | C_unshiu_00435 | 91493  | 103442 | 11950 | 5.59  | 99.95 |
| scaffold00940 | 1     | 5101  | 5101  | 8.56  | C_unshiu_00010 | 901206 | 896109 | 5098  | 0.52  | 99.76 |
| scaffold00940 | 7356  | 10995 | 3640  | 6.11  | C_unshiu_01067 | 84942  | 88583  | 3642  | 3.68  | 99.78 |
| scaffold00940 | 11608 | 13795 | 2188  | 3.67  | C_unshiu_01067 | 89818  | 91994  | 2177  | 2.2   | 98.95 |
| scaffold00940 | 13811 | 17533 | 3723  | 6.25  | C_unshiu_00862 | 5468   | 1718   | 3751  | 3.09  | 98.85 |
| scaffold00940 | 20358 | 24404 | 4047  | 6.79  | C_unshiu_00025 | 728639 | 724582 | 4058  | 0.54  | 98.75 |
| scaffold00940 | 38016 | 50785 | 12770 | 21.44 | C_unshiu_01827 | 46205  | 33427  | 12779 | 26.93 | 99.44 |
| scaffold00940 | 51407 | 52906 | 1500  | 2.52  | C_unshiu_01827 | 32622  | 31123  | 1500  | 3.16  | 100   |
| scaffold00940 | 53032 | 54562 | 1531  | 2.57  | C_unshiu_01827 | 30761  | 29232  | 1530  | 3.22  | 99.8  |
| scaffold00940 | 55261 | 59569 | 4309  | 7.23  | C_unshiu_01827 | 16855  | 21163  | 4309  | 9.08  | 99.86 |
| scaffold00941 | 1     | 2753  | 2753  | 4.63  | C_unshiu_00225 | 274898 | 277661 | 2764  | 0.88  | 98.01 |
| scaffold00941 | 2826  | 12672 | 9847  | 16.56 | C_unshiu_00225 | 278199 | 288012 | 9814  | 3.14  | 99.57 |
| scaffold00941 | 13710 | 20839 | 7130  | 11.99 | C_unshiu_00213 | 284358 | 291505 | 7148  | 2.19  | 98.46 |
| scaffold00941 | 21691 | 35405 | 13715 | 23.06 | C_unshiu_00225 | 297194 | 310895 | 13702 | 4.38  | 99.25 |
| scaffold00941 | 39914 | 41313 | 1400  | 2.35  | C_unshiu_00213 | 296557 | 297950 | 1394  | 0.43  | 98.79 |
| scaffold00941 | 45584 | 51739 | 6156  | 10.35 | C_unshiu_00213 | 303190 | 309345 | 6156  | 1.89  | 99.89 |
| scaffold00941 | 51176 | 58067 | 6892  | 11.59 | C_unshiu_00213 | 312913 | 319806 | 6894  | 2.11  | 99.77 |
| scaffold00943 | 18871 | 19968 | 1098  | 1.85  | C_unshiu_00424 | 198133 | 197025 | 1109  | 0.51  | 98.56 |
| scaffold00943 | 21879 | 23432 | 1554  | 2.62  | C_unshiu_00424 | 194878 | 193312 | 1567  | 0.72  | 98.85 |
| scaffold00943 | 30129 | 31778 | 1650  | 2.78  | C_unshiu_00424 | 187309 | 185656 | 1654  | 0.76  | 98.79 |
| scaffold00943 | 34689 | 36785 | 2097  | 3.54  | C_unshiu_00612 | 131158 | 133254 | 2097  | 1.27  | 100   |
| scaffold00944 | 2289  | 15489 | 13201 | 22.29 | C_unshiu_00620 | 11393  | 24586  | 13194 | 8.09  | 99.43 |
| scaffold00944 | 22698 | 24882 | 2185  | 3.69  | C_unshiu_00620 | 32578  | 34764  | 2187  | 1.34  | 99.63 |
| scaffold00944 | 28938 | 32825 | 3888  | 6.57  | C_unshiu_00620 | 38807  | 42694  | 3888  | 2.38  | 99.9  |
| scaffold00944 | 33518 | 36921 | 3404  | 5.75  | C_unshiu_00717 | 59015  | 55596  | 3420  | 2.42  | 99.27 |
| scaffold00944 | 39574 | 52979 | 13406 | 22.64 | C_unshiu_00620 | 49333  | 62775  | 13443 | 8.24  | 99.46 |
| scaffold00944 | 54678 | 55971 | 1294  | 2.19  | C_unshiu_00620 | 64857  | 66150  | 1294  | 0.79  | 100   |
| scaffold00944 | 56011 | 57047 | 1037  | 1.75  | C_unshiu_00620 | 62695  | 63731  | 1037  | 0.64  | 99.81 |
| scaffold00944 | 57465 | 59212 | 1748  | 2.95  | C_unshiu_00620 | 66429  | 68176  | 1748  | 1.07  | 100   |
| scaffold00945 | 7858  | 12346 | 4489  | 7.58  | C_unshiu_00242 | 300595 | 296129 | 4467  | 1.49  | 98.49 |
| scaffold00945 | 9265  | 21113 | 11849 | 20.02 | C_unshiu_00232 | 147232 | 135432 | 11801 | 3.85  | 98.9  |
| scaffold00945 | 17258 | 24292 | 7035  | 11.88 | C_unshiu_00242 | 296134 | 289058 | 7077  | 2.35  | 98.5  |
| scaffold00945 | 22710 | 29339 | 6630  | 11.2  | C_unshiu_00232 | 134408 | 127839 | 6570  | 2.14  | 98.03 |
| scaffold00945 | 33475 | 36547 | 3073  | 5.19  | C_unshiu_00232 | 120194 | 117122 | 3073  | 1     | 99.93 |
| scaffold00945 | 37226 | 39689 | 2464  | 4.16  | C_unshiu_00232 | 116032 | 113569 | 2464  | 0.8   | 100   |
| scaffold00945 | 40107 | 44679 | 4573  | 7.73  | C_unshiu_00232 | 112818 | 108246 | 4573  | 1.49  | 100   |
| scaffold00945 | 44938 | 46364 | 1427  | 2.41  | C_unshiu_00232 | 107624 | 106198 | 1427  | 0.47  | 99.93 |
| scaffold00945 | 46711 | 59197 | 12487 | 21.09 | C_unshiu_00061 | 184883 | 172396 | 12488 | 2.16  | 99.98 |
| scaffold00946 | 16658 | 20225 | 3568  | 6.05  | C_unshiu_03109 | 3536   | 1      | 3536  | 39.36 | 98.66 |
| scaffold00946 | 37709 | 43865 | 6157  | 10.44 | C_unshiu_01017 | 64551  | 58390  | 6162  | 5.91  | 99.76 |
| scaffold00946 | 45568 | 52019 | 6452  | 10.94 | C_unshiu_01017 | 57755  | 51303  | 6453  | 6.19  | 99.97 |
| scaffold00947 | 1     | 5226  | 5226  | 8.9   | C_unshiu_00304 | 1708   | 6963   | 5256  | 1.98  | 99.43 |
| scaffold00947 | 4896  | 7235  | 2340  | 3.98  | C_unshiu_00304 | 11546  | 13885  | 2340  | 0.88  | 99.83 |
| scaffold00947 | 7509  | 9952  | 2444  | 4.16  | C_unshiu_00304 | 13890  | 16321  | 2432  | 0.92  | 98.86 |
| scaffold00947 | 11505 | 14049 | 2545  | 4.33  | C_unshiu_00304 | 15944  | 18488  | 2545  | 0.96  | 100   |
| scaffold00947 | 14989 | 19852 | 4864  | 8.28  | C_unshiu_00304 | 20117  | 24977  | 4861  | 1.84  | 98.97 |
| scaffold00947 | 23804 | 33206 | 9403  | 16.01 | C_unshiu_00304 | 28457  | 37864  | 9408  | 3.55  | 98.99 |
| scaffold00947 | 48590 | 49618 | 1029  | 1.75  | C_unshiu_01764 | 34941  | 33913  | 1029  | 2.06  | 100   |
| scaffold00947 | 49612 | 55275 | 5664  | 9.64  | C_unshiu_00304 | 231556 | 225900 | 5657  | 2.14  | 99.08 |
| scaffold00947 | 55303 | 58750 | 3448  | 5.87  | C_unshiu_00304 | 223291 | 219845 | 3447  | 1.3   | 99.8  |
| scaffold00948 | 4     | 15755 | 15752 | 26.82 | C_unshiu_00512 | 116853 | 132650 | 15798 | 8.42  | 99.24 |
| scaffold00948 | 15808 | 17474 | 1667  | 2.84  | C_unshiu_00512 | 132560 | 134226 | 1667  | 0.89  | 100   |
| scaffold00948 | 49234 | 58739 | 9506  | 16.18 | C_unshiu_00101 | 15441  | 5936   | 9506  | 2.09  | 99.99 |
| scaffold00950 | 296   | 1865  | 1570  | 2.67  | C_unshiu_00033 | 284770 | 283201 | 1570  | 0.22  | 100   |
| scaffold00950 | 10019 | 15471 | 5453  | 9.29  | C_unshiu_00888 | 18362  | 23812  | 5451  | 4.6   | 99.36 |
| scaffold00950 | 10200 | 19799 | 9600  | 16.35 | C_unshiu_00188 | 329089 | 338682 | 9594  | 2.78  | 99.25 |
| scaffold00950 | 23568 | 26587 | 3020  | 5.14  | C_unshiu_00188 | 338691 | 341694 | 3004  | 0.87  | 99.07 |
| scaffold00950 | 36459 | 38140 | 1682  | 2.86  | C_unshiu_00188 | 343388 | 345072 | 1685  | 0.49  | 98.11 |
| scaffold00950 | 38325 | 49109 | 10785 | 18.36 | C_unshiu_00558 | 35705  | 46478  | 10774 | 6.12  | 99.79 |
| scaffold00950 | 49103 | 51067 | 1965  | 3.35  | C_unshiu_01593 | 33493  | 31529  | 1965  | 3.4   | 100   |
| scaffold00951 | 13297 | 24992 | 11696 | 19.95 | C_unshiu_00408 | 155654 | 167328 | 11675 | 5.27  | 98.28 |
| scaffold00951 | 40851 | 55058 | 14208 | 24.23 | C_unshiu_01762 | 49920  | 35714  | 14207 | 28.46 | 99.78 |
| scaffold00951 | 55125 | 56415 | 1291  | 2.2   | C_unshiu_01762 | 35492  | 34202  | 1291  | 2.59  | 100   |
| scaffold00952 | 2565  | 9607  | 7043  | 12.02 | C_unshiu_00888 | 103126 | 96079  | 7048  | 5.95  | 99.55 |
| scaffold00952 | 9608  | 10920 | 1313  | 2.24  | C_unshiu_00980 | 17166  | 18478  | 1313  | 1.21  | 100   |
| scaffold00952 | 10915 | 28251 | 17337 | 29.59 | C_unshiu_00888 | 94323  | 77044  | 17280 | 14.58 | 99.53 |
| scaffold00952 | 30213 | 46980 | 16768 | 28.62 | C_unshiu_00888 | 75057  | 58326  | 16732 | 14.12 | 99.61 |
| scaffold00952 | 47574 | 49682 | 2109  | 3.6   | C_unshiu_00888 | 57626  | 55522  | 2105  | 1.78  | 99.43 |
| scaffold00954 | 3427  | 9566  | 6140  | 10.51 | C_unshiu_00059 | 85634  | 91773  | 6140  | 1.04  | 99.85 |
| scaffold00954 | 13777 | 18665 | 4889  | 8.37  | C_unshiu_00059 | 95256  | 100160 | 4905  | 0.83  | 99.18 |
| scaffold00954 | 19235 | 20833 | 1599  | 2.74  | C_unshiu_00059 | 101222 | 102822 | 1601  | 0.27  | 99.69 |
| scaffold00954 | 38744 | 40125 | 1382  | 2.37  | C_unshiu_00059 | 112153 | 113539 | 1387  | 0.24  | 99.21 |
| scaffold00954 | 43824 | 44958 | 1135  | 1.94  | C_unshiu_02019 | 31314  | 32448  | 1135  | 2.84  | 99.91 |
| scaffold00955 | 1144  | 16656 | 15513 | 26.59 | C_unshiu_02245 | 582    | 16090  | 15509 | 48.64 | 99.73 |
| scaffold00955 | 17270 | 18298 | 1029  | 1.76  | C_unshiu_02245 | 16091  | 17120  | 1030  | 3.23  | 99.32 |

|               |       |       |       |       |                |        |        |       |       |       |
|---------------|-------|-------|-------|-------|----------------|--------|--------|-------|-------|-------|
| scaffold00955 | 18306 | 20485 | 2180  | 3.74  | C_unshiu_02245 | 17506  | 19685  | 2180  | 6.84  | 100   |
| scaffold00955 | 21364 | 22874 | 1511  | 2.59  | C_unshiu_02245 | 21027  | 22547  | 1521  | 4.77  | 99.34 |
| scaffold00955 | 29756 | 32305 | 2550  | 4.37  | C_unshiu_01050 | 99343  | 96794  | 2550  | 2.55  | 99.49 |
| scaffold00955 | 39596 | 44128 | 4533  | 7.77  | C_unshiu_01050 | 89099  | 84568  | 4532  | 4.53  | 99.82 |
| scaffold00955 | 48658 | 50052 | 1395  | 2.39  | C_unshiu_00418 | 58602  | 57203  | 1400  | 0.64  | 99.5  |
| scaffold00955 | 56834 | 58343 | 1510  | 2.59  | C_unshiu_00418 | 53087  | 51577  | 1511  | 0.69  | 99.54 |
| scaffold00956 | 17696 | 23753 | 6058  | 10.4  | C_unshiu_00188 | 305882 | 299846 | 6037  | 1.75  | 98.5  |
| scaffold00956 | 23749 | 33765 | 10017 | 17.19 | C_unshiu_00188 | 298653 | 288614 | 10040 | 2.91  | 98.71 |
| scaffold00956 | 32728 | 33769 | 1042  | 1.79  | C_unshiu_00648 | 1      | 1041   | 1041  | 0.66  | 99.62 |
| scaffold00956 | 34260 | 38368 | 4109  | 7.05  | C_unshiu_00188 | 283806 | 279673 | 4134  | 1.2   | 98.19 |
| scaffold00956 | 44072 | 48934 | 4863  | 8.35  | C_unshiu_00648 | 10086  | 14948  | 4863  | 3.09  | 99.98 |
| scaffold00957 | 527   | 57194 | 56668 | 97.56 | C_unshiu_01376 | 3519   | 60065  | 56547 | 78.58 | 99.68 |
| scaffold00958 | 1     | 9281  | 9281  | 16.09 | C_unshiu_01961 | 35129  | 25839  | 9291  | 21.96 | 98.86 |
| scaffold00958 | 23759 | 25418 | 1660  | 2.88  | C_unshiu_01961 | 13587  | 11928  | 1660  | 3.92  | 99.46 |
| scaffold00958 | 43947 | 47871 | 3925  | 6.8   | C_unshiu_00669 | 3922   | 1      | 3922  | 2.57  | 98.83 |
| scaffold00959 | 5153  | 10302 | 5150  | 8.94  | C_unshiu_02904 | 15626  | 10540  | 5087  | 32.55 | 98.78 |
| scaffold00959 | 11137 | 27119 | 15983 | 27.74 | C_unshiu_01980 | 26971  | 11007  | 15965 | 38.73 | 99.49 |
| scaffold00959 | 27118 | 28594 | 1477  | 2.56  | C_unshiu_01980 | 10965  | 9488   | 1478  | 3.59  | 98.92 |
| scaffold00959 | 28588 | 31151 | 2564  | 4.45  | C_unshiu_00269 | 107407 | 104844 | 2564  | 0.91  | 100   |
| scaffold00959 | 31152 | 39374 | 8223  | 14.27 | C_unshiu_01980 | 8210   | 1      | 8210  | 19.91 | 98.46 |
| scaffold00959 | 43648 | 49477 | 5830  | 10.12 | C_unshiu_01623 | 31543  | 37385  | 5843  | 10.34 | 99.38 |
| scaffold00959 | 53005 | 55492 | 2488  | 4.32  | C_unshiu_01980 | 31442  | 28955  | 2488  | 6.04  | 100   |
| scaffold00959 | 56003 | 57607 | 1605  | 2.79  | C_unshiu_01980 | 28137  | 26538  | 1600  | 3.88  | 98.88 |
| scaffold00960 | 1500  | 30163 | 28664 | 49.87 | C_unshiu_00351 | 196017 | 167397 | 28621 | 11.91 | 99.09 |
| scaffold00960 | 10572 | 46705 | 36134 | 62.87 | C_unshiu_00351 | 186998 | 150855 | 36144 | 15.04 | 99.97 |
| scaffold00960 | 51921 | 57472 | 5552  | 9.66  | C_unshiu_00351 | 150867 | 145316 | 5552  | 2.31  | 100   |
| scaffold00961 | 1     | 5442  | 5442  | 9.5   | C_unshiu_00653 | 118545 | 123986 | 5442  | 3.51  | 99.98 |
| scaffold00961 | 5432  | 15336 | 9905  | 17.28 | C_unshiu_00653 | 124383 | 134265 | 9883  | 6.37  | 98.78 |
| scaffold00961 | 13794 | 31451 | 17658 | 30.81 | C_unshiu_00653 | 133200 | 150837 | 17638 | 11.37 | 98.8  |
| scaffold00961 | 35655 | 39438 | 3784  | 6.6   | C_unshiu_01192 | 82945  | 79164  | 3782  | 4.38  | 99.95 |
| scaffold00961 | 39792 | 46283 | 6492  | 11.33 | C_unshiu_01192 | 78387  | 71929  | 6459  | 7.49  | 98.05 |
| scaffold00962 | 27    | 10202 | 10176 | 17.8  | C_unshiu_02584 | 11781  | 1573   | 10209 | 45.4  | 98.71 |
| scaffold00962 | 11284 | 12870 | 1587  | 2.78  | C_unshiu_00042 | 247829 | 246238 | 1592  | 0.25  | 98.99 |
| scaffold00962 | 16694 | 18189 | 1496  | 2.62  | C_unshiu_00042 | 243040 | 241550 | 1491  | 0.23  | 99.4  |
| scaffold00962 | 20049 | 21335 | 1287  | 2.25  | C_unshiu_00894 | 58866  | 57580  | 1287  | 1.09  | 100   |
| scaffold00962 | 21327 | 22948 | 1622  | 2.84  | C_unshiu_01794 | 43304  | 41681  | 1624  | 3.34  | 98.89 |
| scaffold00962 | 22972 | 26344 | 3373  | 5.9   | C_unshiu_01794 | 41555  | 38180  | 3376  | 6.94  | 99.29 |
| scaffold00962 | 32614 | 33874 | 1261  | 2.21  | C_unshiu_01794 | 31875  | 30615  | 1261  | 2.59  | 99.76 |
| scaffold00962 | 43216 | 49547 | 6332  | 11.07 | C_unshiu_02584 | 17155  | 10824  | 6332  | 28.16 | 99.91 |
| scaffold00963 | 1591  | 2630  | 1040  | 1.82  | C_unshiu_00173 | 1260   | 2299   | 1040  | 0.29  | 99.81 |
| scaffold00963 | 9263  | 14911 | 5649  | 9.89  | C_unshiu_01693 | 42751  | 48399  | 5649  | 10.71 | 99.95 |
| scaffold00963 | 37774 | 39487 | 1714  | 3     | C_unshiu_01110 | 89994  | 91708  | 1715  | 1.81  | 99.71 |
| scaffold00963 | 40767 | 43941 | 3175  | 5.56  | C_unshiu_00566 | 160012 | 156839 | 3174  | 1.82  | 98.68 |
| scaffold00963 | 50339 | 52187 | 1849  | 3.24  | C_unshiu_00566 | 150805 | 148952 | 1854  | 1.06  | 98.45 |
| scaffold00964 | 3823  | 6533  | 2711  | 4.75  | C_unshiu_00732 | 76231  | 78941  | 2711  | 1.96  | 100   |
| scaffold00964 | 6528  | 10626 | 4099  | 7.18  | C_unshiu_01122 | 48468  | 52566  | 4099  | 4.37  | 100   |
| scaffold00964 | 11440 | 13081 | 1642  | 2.88  | C_unshiu_01122 | 53803  | 55444  | 1642  | 1.75  | 100   |
| scaffold00964 | 14243 | 16801 | 2559  | 4.48  | C_unshiu_01122 | 56921  | 59478  | 2558  | 2.73  | 99.69 |
| scaffold00964 | 16788 | 19450 | 2663  | 4.66  | C_unshiu_01194 | 67713  | 70374  | 2662  | 3.09  | 99.96 |
| scaffold00964 | 26957 | 39379 | 12423 | 21.76 | C_unshiu_01122 | 65108  | 77563  | 12456 | 13.27 | 99.5  |
| scaffold00964 | 39567 | 42092 | 2526  | 4.42  | C_unshiu_01122 | 77883  | 80408  | 2526  | 2.69  | 100   |
| scaffold00964 | 42107 | 53124 | 11018 | 19.3  | C_unshiu_01122 | 81852  | 92870  | 11019 | 11.74 | 99.96 |
| scaffold00966 | 1     | 10659 | 10659 | 18.71 | C_unshiu_02636 | 10652  | 1      | 10652 | 50.1  | 99.93 |
| scaffold00966 | 12794 | 32027 | 19234 | 33.76 | C_unshiu_01063 | 99001  | 79745  | 19257 | 19.45 | 99.46 |
| scaffold00966 | 40294 | 54816 | 14523 | 25.49 | C_unshiu_02409 | 1      | 14518  | 14518 | 53.49 | 99.87 |
| scaffold00967 | 3284  | 4330  | 1047  | 1.85  | C_unshiu_00021 | 62951  | 64000  | 1050  | 0.13  | 98.95 |
| scaffold00967 | 11781 | 15170 | 3390  | 5.99  | C_unshiu_00080 | 287819 | 284404 | 3416  | 0.69  | 98.42 |
| scaffold00967 | 15762 | 17554 | 1793  | 3.17  | C_unshiu_00080 | 280825 | 279043 | 1783  | 0.36  | 99.16 |
| scaffold00967 | 39126 | 40520 | 1395  | 2.47  | C_unshiu_00304 | 131911 | 133299 | 1389  | 0.52  | 99.35 |
| scaffold00967 | 43998 | 45618 | 1621  | 2.87  | C_unshiu_01864 | 16046  | 17665  | 1620  | 3.53  | 99.2  |
| scaffold00967 | 46119 | 47698 | 1580  | 2.79  | C_unshiu_00304 | 140016 | 141571 | 1556  | 0.59  | 98.48 |
| scaffold00967 | 48398 | 56574 | 8177  | 14.45 | C_unshiu_00304 | 142917 | 151117 | 8201  | 3.1   | 98.64 |
| scaffold00968 | 1     | 1673  | 1673  | 2.96  | C_unshiu_01601 | 24115  | 25783  | 1669  | 2.9   | 98.45 |
| scaffold00968 | 2132  | 11994 | 9863  | 17.45 | C_unshiu_01601 | 26015  | 35922  | 9908  | 17.24 | 98.85 |
| scaffold00968 | 10294 | 21445 | 11152 | 19.73 | C_unshiu_00482 | 88755  | 77641  | 11115 | 5.63  | 99.33 |
| scaffold00968 | 27616 | 37214 | 9599  | 16.98 | C_unshiu_00482 | 77648  | 67989  | 9660  | 4.89  | 98.48 |
| scaffold00968 | 37254 | 40773 | 3520  | 6.23  | C_unshiu_00676 | 126203 | 122682 | 3522  | 2.36  | 99.09 |
| scaffold00968 | 42053 | 45522 | 3470  | 6.14  | C_unshiu_00482 | 66154  | 62685  | 3470  | 1.76  | 99.77 |
| scaffold00969 | 6     | 28075 | 28070 | 50.03 | C_unshiu_00049 | 169108 | 141011 | 28098 | 4.55  | 99.4  |
| scaffold00969 | 26306 | 56105 | 29800 | 53.11 | C_unshiu_00049 | 200991 | 171324 | 29668 | 4.8   | 99.05 |
| scaffold00970 | 1887  | 4070  | 2184  | 3.91  | C_unshiu_01198 | 59784  | 61979  | 2196  | 2.56  | 98.5  |
| scaffold00970 | 8593  | 9833  | 1241  | 2.22  | C_unshiu_01198 | 67074  | 68314  | 1241  | 1.45  | 99.19 |
| scaffold00970 | 8854  | 10120 | 1267  | 2.27  | C_unshiu_00534 | 117472 | 118738 | 1267  | 0.69  | 99.76 |
| scaffold00970 | 10130 | 13996 | 3867  | 6.92  | C_unshiu_00534 | 119408 | 123273 | 3866  | 2.12  | 99.84 |
| scaffold00970 | 14571 | 16268 | 1698  | 3.04  | C_unshiu_00534 | 123979 | 125676 | 1698  | 0.93  | 100   |
| scaffold00970 | 16827 | 21287 | 4461  | 7.99  | C_unshiu_00534 | 125736 | 130195 | 4460  | 2.45  | 98.77 |
| scaffold00970 | 21872 | 23076 | 1205  | 2.16  | C_unshiu_00534 | 129822 | 131025 | 1204  | 0.66  | 99.42 |
| scaffold00970 | 23500 | 25326 | 1827  | 3.27  | C_unshiu_00534 | 172100 | 173930 | 1831  | 1     | 99.24 |
| scaffold00970 | 25355 | 28376 | 3022  | 5.41  | C_unshiu_00534 | 131354 | 134386 | 3033  | 1.66  | 98.55 |

|               |       |       |       |       |                |        |        |       |       |       |
|---------------|-------|-------|-------|-------|----------------|--------|--------|-------|-------|-------|
| scaffold00970 | 25355 | 28376 | 3022  | 5.41  | C_unshiu_01198 | 75575  | 78596  | 3022  | 3.52  | 98.74 |
| scaffold00970 | 30266 | 38587 | 8322  | 14.9  | C_unshiu_00534 | 136897 | 145218 | 8322  | 4.56  | 100   |
| scaffold00970 | 45646 | 46886 | 1241  | 2.22  | C_unshiu_00534 | 155539 | 156777 | 1239  | 0.68  | 99.68 |
| scaffold00970 | 50435 | 52467 | 2033  | 3.64  | C_unshiu_00534 | 160032 | 162042 | 2011  | 1.1   | 98.23 |
| scaffold00970 | 53251 | 54652 | 1402  | 2.51  | C_unshiu_01198 | 20845  | 22239  | 1395  | 1.63  | 98.07 |
| scaffold00971 | 1     | 2450  | 2450  | 4.39  | C_unshiu_00750 | 89906  | 92354  | 2449  | 1.79  | 99.55 |
| scaffold00971 | 3679  | 16928 | 13250 | 23.73 | C_unshiu_00750 | 93887  | 107070 | 13184 | 9.66  | 99.01 |
| scaffold00971 | 17819 | 26811 | 8993  | 16.1  | C_unshiu_00750 | 107066 | 116015 | 8950  | 6.56  | 98.63 |
| scaffold00971 | 37708 | 39457 | 1750  | 3.13  | C_unshiu_00053 | 587482 | 589232 | 1751  | 0.29  | 99.94 |
| scaffold00971 | 40514 | 47233 | 6720  | 12.03 | C_unshiu_00053 | 590511 | 597230 | 6720  | 1.13  | 100   |
| scaffold00972 | 14154 | 21751 | 7598  | 13.62 | C_unshiu_01611 | 34213  | 26642  | 7572  | 13.27 | 98.19 |
| scaffold00972 | 22246 | 27735 | 5490  | 9.84  | C_unshiu_01611 | 26363  | 20906  | 5458  | 9.56  | 98.24 |
| scaffold00972 | 28505 | 37603 | 9099  | 16.31 | C_unshiu_01611 | 2930   | 12110  | 9181  | 16.08 | 98.6  |
| scaffold00972 | 37994 | 42465 | 4472  | 8.02  | C_unshiu_02911 | 6696   | 11161  | 4466  | 28.77 | 98.75 |
| scaffold00972 | 45790 | 47923 | 2134  | 3.83  | C_unshiu_00128 | 129101 | 131233 | 2133  | 0.52  | 99.53 |
| scaffold00972 | 50334 | 55777 | 5444  | 9.76  | C_unshiu_00128 | 132081 | 137524 | 5444  | 1.32  | 99.94 |
| scaffold00973 | 780   | 5338  | 4559  | 8.19  | C_unshiu_00897 | 117399 | 112896 | 4504  | 3.84  | 98.49 |
| scaffold00973 | 5369  | 14705 | 9337  | 16.77 | C_unshiu_00897 | 112538 | 103129 | 9410  | 8.01  | 99.19 |
| scaffold00973 | 14706 | 16093 | 1388  | 2.49  | C_unshiu_00329 | 59910  | 61290  | 1381  | 0.55  | 99.06 |
| scaffold00973 | 19798 | 21697 | 1900  | 3.41  | C_unshiu_00329 | 65616  | 67516  | 1901  | 0.75  | 99.05 |
| scaffold00973 | 32182 | 33464 | 1283  | 2.3   | C_unshiu_01007 | 27846  | 26565  | 1282  | 1.22  | 98.05 |
| scaffold00973 | 34405 | 35964 | 1560  | 2.8   | C_unshiu_01116 | 36968  | 38527  | 1560  | 1.66  | 99.49 |
| scaffold00973 | 41735 | 44818 | 3084  | 5.54  | C_unshiu_00675 | 144183 | 141101 | 3083  | 2.06  | 99.61 |
| scaffold00973 | 44420 | 55687 | 11268 | 20.23 | C_unshiu_01116 | 43084  | 54359  | 11276 | 11.98 | 99.56 |
| scaffold00974 | 5499  | 9540  | 4042  | 7.29  | C_unshiu_01187 | 7921   | 3894   | 4028  | 4.64  | 98.39 |
| scaffold00974 | 9558  | 11924 | 2367  | 4.27  | C_unshiu_01187 | 3669   | 1303   | 2367  | 2.73  | 99.32 |
| scaffold00974 | 16953 | 24220 | 7268  | 13.11 | C_unshiu_01126 | 23547  | 30849  | 7303  | 7.82  | 98.74 |
| scaffold00974 | 26599 | 30750 | 4152  | 7.49  | C_unshiu_01126 | 31406  | 35555  | 4150  | 4.45  | 99.95 |
| scaffold00974 | 38660 | 55430 | 16771 | 30.26 | C_unshiu_02071 | 25584  | 8896   | 16689 | 44.08 | 98.63 |
| scaffold00975 | 12946 | 16831 | 3886  | 7.01  | C_unshiu_00420 | 44957  | 41096  | 3862  | 1.76  | 98.43 |
| scaffold00975 | 16927 | 22974 | 6048  | 10.92 | C_unshiu_02906 | 9495   | 15581  | 6087  | 39.07 | 98.59 |
| scaffold00975 | 32599 | 48508 | 15910 | 28.72 | C_unshiu_00689 | 112369 | 96571  | 15799 | 10.79 | 98.95 |
| scaffold00976 | 1594  | 2979  | 1386  | 2.51  | C_unshiu_00081 | 464869 | 466255 | 1387  | 0.29  | 99.93 |
| scaffold00976 | 5280  | 10700 | 5421  | 9.81  | C_unshiu_01155 | 80150  | 85562  | 5413  | 6.01  | 99.28 |
| scaffold00976 | 11176 | 14929 | 3754  | 6.79  | C_unshiu_01310 | 68505  | 64752  | 3754  | 4.93  | 99.6  |
| scaffold00976 | 21047 | 55273 | 34227 | 61.92 | C_unshiu_01310 | 59732  | 25515  | 34218 | 44.9  | 99.8  |
| scaffold00977 | 2     | 24386 | 24385 | 44.29 | C_unshiu_01541 | 57718  | 33354  | 24365 | 39.97 | 99.24 |
| scaffold00977 | 20183 | 33569 | 13387 | 24.31 | C_unshiu_00097 | 342221 | 328892 | 13330 | 2.89  | 98.92 |
| scaffold00977 | 33563 | 38691 | 5129  | 9.32  | C_unshiu_00169 | 327157 | 332285 | 5129  | 1.39  | 100   |
| scaffold00977 | 40012 | 55057 | 15046 | 27.33 | C_unshiu_00097 | 322658 | 307615 | 15044 | 3.27  | 99.99 |
| scaffold00978 | 10233 | 15437 | 5205  | 9.47  | C_unshiu_00381 | 123933 | 129136 | 5204  | 2.27  | 99.87 |
| scaffold00978 | 16016 | 17301 | 1286  | 2.34  | C_unshiu_00381 | 130311 | 131596 | 1286  | 0.56  | 100   |
| scaffold00978 | 17657 | 47364 | 29708 | 54.05 | C_unshiu_00381 | 132260 | 161872 | 29613 | 12.93 | 99.36 |
| scaffold00979 | 14508 | 19938 | 5431  | 9.9   | C_unshiu_00851 | 92079  | 97511  | 5433  | 4.43  | 99.6  |
| scaffold00979 | 21026 | 24859 | 3834  | 6.99  | C_unshiu_00851 | 99026  | 102858 | 3833  | 3.13  | 99.24 |
| scaffold00979 | 52983 | 54863 | 1881  | 3.43  | C_unshiu_00101 | 23007  | 24887  | 1881  | 0.41  | 100   |
| scaffold00983 | 2506  | 3809  | 1304  | 2.38  | C_unshiu_00734 | 68973  | 70276  | 1304  | 0.94  | 99.62 |
| scaffold00983 | 4538  | 18766 | 14229 | 25.97 | C_unshiu_00439 | 106058 | 120278 | 14221 | 6.71  | 99.89 |
| scaffold00983 | 18504 | 54795 | 36292 | 66.23 | C_unshiu_00439 | 120146 | 156437 | 36292 | 17.12 | 99.99 |
| scaffold00984 | 24986 | 54802 | 29817 | 54.41 | C_unshiu_00635 | 105237 | 135053 | 29817 | 18.64 | 99.97 |
| scaffold00985 | 12178 | 15116 | 2939  | 5.37  | C_unshiu_00747 | 136532 | 133595 | 2938  | 2.15  | 99.66 |
| scaffold00985 | 15419 | 24126 | 8708  | 15.92 | C_unshiu_00747 | 126023 | 117302 | 8722  | 6.38  | 99.15 |
| scaffold00985 | 24224 | 35243 | 11020 | 20.14 | C_unshiu_00747 | 116619 | 105600 | 11020 | 8.06  | 99.98 |
| scaffold00985 | 35451 | 54701 | 19251 | 35.19 | C_unshiu_00747 | 105337 | 86127  | 19211 | 14.06 | 99.19 |
| scaffold00986 | 1005  | 3264  | 2260  | 4.14  | C_unshiu_00780 | 73099  | 70840  | 2260  | 1.72  | 100   |
| scaffold00986 | 6117  | 7978  | 1862  | 3.41  | C_unshiu_01005 | 12433  | 10574  | 1860  | 1.77  | 99.89 |
| scaffold00986 | 8727  | 10363 | 1637  | 3     | C_unshiu_01005 | 9428   | 7792   | 1637  | 1.56  | 99.88 |
| scaffold00986 | 10385 | 17901 | 7517  | 13.76 | C_unshiu_01005 | 7561   | 1      | 7561  | 7.19  | 99.39 |
| scaffold00986 | 24419 | 25655 | 1237  | 2.26  | C_unshiu_00464 | 97021  | 95785  | 1237  | 0.61  | 100   |
| scaffold00986 | 31197 | 34400 | 3204  | 5.87  | C_unshiu_01972 | 40587  | 37384  | 3204  | 7.69  | 99.88 |
| scaffold00986 | 36526 | 37951 | 1426  | 2.61  | C_unshiu_01972 | 36318  | 34893  | 1426  | 3.42  | 100   |
| scaffold00986 | 39576 | 46645 | 7070  | 12.94 | C_unshiu_01972 | 33015  | 25952  | 7064  | 16.96 | 99.82 |
| scaffold00986 | 46695 | 48099 | 1405  | 2.57  | C_unshiu_01972 | 25828  | 24424  | 1405  | 3.37  | 100   |
| scaffold00987 | 7343  | 12289 | 4947  | 9.07  | C_unshiu_01109 | 68136  | 73082  | 4947  | 5.19  | 99.98 |
| scaffold00987 | 17510 | 27082 | 9573  | 17.56 | C_unshiu_01109 | 78839  | 88411  | 9573  | 10.05 | 100   |
| scaffold00987 | 49352 | 53178 | 3827  | 7.02  | C_unshiu_00245 | 136142 | 132316 | 3827  | 1.28  | 100   |
| scaffold00988 | 733   | 3803  | 3071  | 5.64  | C_unshiu_00879 | 109313 | 112427 | 3115  | 2.61  | 98.04 |
| scaffold00988 | 4055  | 10427 | 6373  | 11.71 | C_unshiu_00879 | 112931 | 119297 | 6367  | 5.33  | 99.39 |
| scaffold00988 | 25885 | 27306 | 1422  | 2.61  | C_unshiu_00435 | 203387 | 204813 | 1427  | 0.67  | 98.25 |
| scaffold00988 | 30033 | 31716 | 1684  | 3.09  | C_unshiu_00435 | 207948 | 209631 | 1684  | 0.79  | 99.82 |
| scaffold00988 | 37317 | 48769 | 11453 | 21.05 | C_unshiu_00417 | 216428 | 205062 | 11367 | 5.18  | 98.2  |
| scaffold00989 | 1     | 1721  | 1721  | 3.16  | C_unshiu_01015 | 7502   | 9222   | 1721  | 1.65  | 100   |
| scaffold00989 | 5783  | 15567 | 9785  | 17.99 | C_unshiu_01015 | 15121  | 24940  | 9820  | 9.41  | 99.16 |
| scaffold00989 | 16256 | 18811 | 2556  | 4.7   | C_unshiu_00936 | 95162  | 97717  | 2556  | 2.26  | 99.92 |
| scaffold00989 | 19220 | 21103 | 1884  | 3.46  | C_unshiu_00936 | 98464  | 100347 | 1884  | 1.67  | 100   |
| scaffold00989 | 26485 | 28700 | 2216  | 4.07  | C_unshiu_01015 | 34184  | 36399  | 2216  | 2.12  | 99.86 |
| scaffold00989 | 32638 | 38261 | 5624  | 10.34 | C_unshiu_01015 | 39660  | 45280  | 5621  | 5.38  | 99.84 |
| scaffold00989 | 43131 | 44427 | 1297  | 2.38  | C_unshiu_01015 | 48930  | 50226  | 1297  | 1.24  | 99.92 |
| scaffold00989 | 48277 | 49935 | 1659  | 3.05  | C_unshiu_03013 | 12546  | 10888  | 1659  | 13.22 | 100   |

|               |       |       |       |       |                |         |         |       |       |       |
|---------------|-------|-------|-------|-------|----------------|---------|---------|-------|-------|-------|
| scaffold00990 | 8524  | 13143 | 4620  | 8.52  | C_unshiu_01365 | 26857   | 31438   | 4582  | 6.25  | 98.05 |
| scaffold00990 | 10822 | 14736 | 3915  | 7.22  | C_unshiu_00380 | 70770   | 66836   | 3935  | 1.71  | 98.58 |
| scaffold00990 | 14592 | 20347 | 5756  | 10.61 | C_unshiu_00380 | 66838   | 61080   | 5759  | 2.5   | 98.82 |
| scaffold00990 | 29078 | 33157 | 4080  | 7.52  | C_unshiu_00380 | 60435   | 56353   | 4083  | 1.78  | 99.31 |
| scaffold00992 | 3194  | 5653  | 2460  | 4.55  | C_unshiu_00518 | 160445  | 162895  | 2451  | 1.32  | 98.09 |
| scaffold00992 | 6212  | 9071  | 2860  | 5.3   | C_unshiu_00005 | 1129682 | 1132545 | 2864  | 0.25  | 98.61 |
| scaffold00992 | 22683 | 27255 | 4573  | 8.47  | C_unshiu_00005 | 1096953 | 1101494 | 4542  | 0.4   | 98.6  |
| scaffold00992 | 29136 | 31051 | 1916  | 3.55  | C_unshiu_00005 | 1102230 | 1104147 | 1918  | 0.17  | 99.48 |
| scaffold00992 | 32065 | 37873 | 5809  | 10.76 | C_unshiu_00005 | 1105766 | 1111554 | 5789  | 0.51  | 99.43 |
| scaffold00992 | 41752 | 42830 | 1079  | 2     | C_unshiu_03083 | 8623    | 7543    | 1081  | 10.89 | 99.54 |
| scaffold00992 | 45091 | 46455 | 1365  | 2.53  | C_unshiu_03083 | 5635    | 4271    | 1365  | 13.75 | 99.78 |
| scaffold00992 | 47095 | 48364 | 1270  | 2.35  | C_unshiu_03083 | 6838    | 5569    | 1270  | 12.8  | 99.53 |
| scaffold00992 | 49140 | 51753 | 2614  | 4.84  | C_unshiu_03083 | 4324    | 1712    | 2613  | 26.33 | 99.08 |
| scaffold00993 | 2163  | 3462  | 1300  | 2.41  | C_unshiu_00368 | 7903    | 6604    | 1300  | 0.56  | 98.23 |
| scaffold00993 | 5778  | 10270 | 4493  | 8.32  | C_unshiu_00988 | 47889   | 52381   | 4493  | 4.17  | 100   |
| scaffold00993 | 8500  | 10911 | 2412  | 4.47  | C_unshiu_01127 | 76105   | 78516   | 2412  | 2.59  | 100   |
| scaffold00993 | 26815 | 31277 | 4463  | 8.27  | C_unshiu_01357 | 73685   | 69222   | 4464  | 6.06  | 99.69 |
| scaffold00993 | 32050 | 36968 | 4919  | 9.11  | C_unshiu_01357 | 67905   | 62987   | 4919  | 6.68  | 100   |
| scaffold00993 | 41239 | 43244 | 2006  | 3.72  | C_unshiu_01357 | 46918   | 44913   | 2006  | 2.72  | 100   |
| scaffold00993 | 45029 | 47534 | 2506  | 4.64  | C_unshiu_00868 | 88758   | 91263   | 2506  | 2.08  | 99.52 |
| scaffold00993 | 52210 | 53227 | 1018  | 1.89  | C_unshiu_00868 | 95994   | 96999   | 1006  | 0.83  | 98.43 |
| scaffold00995 | 3185  | 28633 | 25449 | 47.2  | C_unshiu_01191 | 36710   | 11263   | 25448 | 29.47 | 99.85 |
| scaffold00995 | 29335 | 39351 | 10017 | 18.58 | C_unshiu_01191 | 10005   | 1       | 10005 | 11.59 | 99.79 |
| scaffold00996 | 2181  | 5183  | 3003  | 5.58  | C_unshiu_02740 | 3009    | 1       | 3009  | 15.69 | 99.5  |
| scaffold00996 | 5178  | 16307 | 11130 | 20.68 | C_unshiu_02740 | 4272    | 15400   | 11129 | 58.04 | 99.72 |
| scaffold00996 | 16332 | 18571 | 2240  | 4.16  | C_unshiu_02740 | 16061   | 18300   | 2240  | 11.68 | 99.2  |
| scaffold00996 | 20559 | 24385 | 3827  | 7.11  | C_unshiu_01866 | 12509   | 8707    | 3803  | 8.29  | 98.88 |
| scaffold00996 | 32239 | 47359 | 15121 | 28.09 | C_unshiu_00333 | 64802   | 49675   | 15128 | 6.02  | 98.4  |
| scaffold00997 | 1     | 53701 | 53701 | 100   | C_unshiu_00813 | 107111  | 53367   | 53745 | 42.28 | 99.92 |
| scaffold00998 | 11918 | 16234 | 4317  | 8.05  | C_unshiu_01882 | 4316    | 1       | 4316  | 9.54  | 99.05 |
| scaffold00998 | 20636 | 22761 | 2126  | 3.97  | C_unshiu_01653 | 55071   | 52946   | 2126  | 3.86  | 99.29 |
| scaffold00998 | 21888 | 23856 | 1969  | 3.67  | C_unshiu_01194 | 64525   | 62557   | 1969  | 2.28  | 99.39 |
| scaffold00998 | 23996 | 47074 | 23079 | 43.06 | C_unshiu_01194 | 62362   | 39275   | 23088 | 26.77 | 99.48 |
| scaffold00998 | 51586 | 53593 | 2008  | 3.75  | C_unshiu_01653 | 25325   | 23308   | 2018  | 3.66  | 98.91 |
| scaffold00999 | 1     | 7413  | 7413  | 13.85 | C_unshiu_01327 | 59193   | 51810   | 7384  | 9.81  | 98.29 |
| scaffold00999 | 7413  | 16624 | 9212  | 17.21 | C_unshiu_01327 | 51679   | 42467   | 9213  | 12.24 | 99.29 |
| scaffold00999 | 17044 | 18865 | 1822  | 3.4   | C_unshiu_01327 | 41945   | 40121   | 1825  | 2.42  | 99.29 |
| scaffold00999 | 22876 | 26139 | 3264  | 6.1   | C_unshiu_01327 | 36736   | 33473   | 3264  | 4.34  | 99.79 |
| scaffold00999 | 44620 | 49400 | 4781  | 8.93  | C_unshiu_02486 | 21127   | 16349   | 4779  | 19.12 | 98.12 |
| scaffold01000 | 1     | 1517  | 1517  | 2.84  | C_unshiu_01900 | 30641   | 29124   | 1518  | 3.39  | 99.87 |
| scaffold01000 | 13601 | 14612 | 1012  | 1.9   | C_unshiu_02103 | 35344   | 36357   | 1014  | 2.79  | 99.7  |
| scaffold01000 | 30562 | 34791 | 4230  | 7.93  | C_unshiu_01900 | 44715   | 40515   | 4201  | 9.4   | 99.15 |
| scaffold01000 | 34812 | 36507 | 1696  | 3.18  | C_unshiu_01900 | 39655   | 37960   | 1696  | 3.79  | 100   |
| scaffold01000 | 39178 | 42094 | 2917  | 5.47  | C_unshiu_01900 | 33487   | 30598   | 2890  | 6.46  | 98.02 |
| scaffold01000 | 42103 | 46801 | 4699  | 8.81  | C_unshiu_02103 | 22362   | 27055   | 4694  | 12.9  | 99.66 |
| scaffold01001 | 1     | 1904  | 1904  | 3.57  | C_unshiu_00588 | 34593   | 36481   | 1889  | 1.11  | 98.27 |
| scaffold01001 | 5339  | 6756  | 1418  | 2.66  | C_unshiu_00588 | 39040   | 40457   | 1418  | 0.83  | 98.87 |
| scaffold01001 | 9842  | 15594 | 5753  | 10.79 | C_unshiu_03081 | 372     | 6176    | 5805  | 58.18 | 98.54 |
| scaffold01001 | 28843 | 53328 | 24486 | 45.92 | C_unshiu_00211 | 188232  | 212677  | 24446 | 7.46  | 99.68 |
| scaffold01002 | 28747 | 37432 | 8686  | 16.32 | C_unshiu_00034 | 230073  | 221377  | 8697  | 1.24  | 99.51 |
| scaffold01002 | 39037 | 41717 | 2681  | 5.04  | C_unshiu_00429 | 1       | 2679    | 2679  | 1.24  | 99.7  |
| scaffold01002 | 42094 | 49710 | 7617  | 14.32 | C_unshiu_00429 | 3432    | 11099   | 7668  | 3.55  | 98.46 |
| scaffold01003 | 8786  | 9916  | 1131  | 2.13  | C_unshiu_01007 | 27574   | 28703   | 1130  | 1.08  | 99.03 |
| scaffold01004 | 1     | 4381  | 4381  | 8.24  | C_unshiu_01855 | 12615   | 8235    | 4381  | 9.46  | 99.89 |
| scaffold01004 | 6570  | 11672 | 5103  | 9.6   | C_unshiu_01855 | 5204    | 75      | 5130  | 11.08 | 99.05 |
| scaffold01004 | 27061 | 36375 | 9315  | 17.53 | C_unshiu_00309 | 204037  | 194744  | 9294  | 3.57  | 99.72 |
| scaffold01004 | 38007 | 39676 | 1670  | 3.14  | C_unshiu_00309 | 192583  | 190915  | 1669  | 0.64  | 99.52 |
| scaffold01004 | 42856 | 44706 | 1851  | 3.48  | C_unshiu_00309 | 177520  | 175670  | 1851  | 0.71  | 100   |
| scaffold01004 | 45042 | 47898 | 2857  | 5.38  | C_unshiu_00309 | 175213  | 172356  | 2858  | 1.1   | 99.23 |
| scaffold01004 | 46438 | 53140 | 6703  | 12.61 | C_unshiu_00309 | 184402  | 177700  | 6703  | 2.57  | 99.88 |
| scaffold01005 | 13512 | 18442 | 4931  | 9.32  | C_unshiu_01904 | 38092   | 33163   | 4930  | 11.08 | 99.88 |
| scaffold01005 | 18976 | 20522 | 1547  | 2.92  | C_unshiu_01904 | 32226   | 30684   | 1543  | 3.47  | 99.74 |
| scaffold01005 | 22954 | 31024 | 8071  | 15.25 | C_unshiu_01904 | 28763   | 20757   | 8007  | 17.99 | 99    |
| scaffold01005 | 37781 | 40114 | 2334  | 4.41  | C_unshiu_01904 | 14704   | 12370   | 2335  | 5.25  | 99.96 |
| scaffold01005 | 40490 | 50348 | 9859  | 18.63 | C_unshiu_01904 | 11587   | 1729    | 9859  | 22.16 | 99.97 |
| scaffold01006 | 1     | 6552  | 6552  | 12.39 | C_unshiu_00128 | 342478  | 335927  | 6552  | 1.59  | 99.86 |
| scaffold01006 | 7570  | 11151 | 3582  | 6.78  | C_unshiu_00128 | 335183  | 331617  | 3567  | 0.86  | 99.14 |
| scaffold01006 | 14146 | 18372 | 4227  | 8     | C_unshiu_00128 | 318198  | 322422  | 4225  | 1.02  | 99.62 |
| scaffold01006 | 29191 | 35598 | 6408  | 12.12 | C_unshiu_00459 | 194277  | 200687  | 6411  | 3.13  | 98.71 |
| scaffold01006 | 43089 | 45054 | 1966  | 3.72  | C_unshiu_02915 | 15432   | 13498   | 1935  | 12.54 | 98.12 |
| scaffold01006 | 45601 | 47598 | 1998  | 3.78  | C_unshiu_02915 | 12615   | 10631   | 1985  | 12.86 | 98.9  |
| scaffold01007 | 24517 | 25652 | 1136  | 2.16  | C_unshiu_00344 | 19892   | 21014   | 1123  | 0.45  | 98.77 |
| scaffold01007 | 29784 | 31050 | 1267  | 2.4   | C_unshiu_00344 | 27977   | 29244   | 1268  | 0.51  | 99.21 |
| scaffold01007 | 31762 | 33783 | 2022  | 3.84  | C_unshiu_00344 | 30078   | 32096   | 2019  | 0.81  | 98.37 |
| scaffold01007 | 37874 | 39436 | 1563  | 2.97  | C_unshiu_02007 | 17904   | 19465   | 1562  | 3.86  | 99.11 |
| scaffold01007 | 39532 | 41732 | 2201  | 4.18  | C_unshiu_01131 | 91979   | 89771   | 2209  | 2.39  | 99.09 |
| scaffold01007 | 41731 | 43053 | 1323  | 2.51  | C_unshiu_01131 | 89696   | 88375   | 1322  | 1.43  | 99.77 |
| scaffold01008 | 9878  | 14403 | 4526  | 8.59  | C_unshiu_00780 | 68571   | 73096   | 4526  | 3.45  | 100   |
| scaffold01008 | 16452 | 20729 | 4278  | 8.12  | C_unshiu_00417 | 60567   | 64854   | 4288  | 1.95  | 98.93 |

|               |       |       |       |       |                |        |        |       |       |       |
|---------------|-------|-------|-------|-------|----------------|--------|--------|-------|-------|-------|
| scaffold01008 | 29552 | 37931 | 8380  | 15.9  | C_unshiu_01455 | 12686  | 4261   | 8426  | 12.74 | 99.37 |
| scaffold01008 | 40091 | 41442 | 1352  | 2.57  | C_unshiu_00965 | 107787 | 106444 | 1344  | 1.22  | 99.33 |
| scaffold01008 | 40091 | 41429 | 1339  | 2.54  | C_unshiu_01455 | 1339   | 1      | 1339  | 2.02  | 99.93 |
| scaffold01008 | 41872 | 43445 | 1574  | 2.99  | C_unshiu_00064 | 494466 | 496039 | 1574  | 0.28  | 100   |
| scaffold01008 | 45443 | 46740 | 1298  | 2.46  | C_unshiu_00064 | 483681 | 484978 | 1298  | 0.23  | 100   |
| scaffold01008 | 49031 | 51346 | 2316  | 4.39  | C_unshiu_00965 | 103576 | 101265 | 2312  | 2.1   | 99.78 |
| scaffold01008 | 51368 | 52697 | 1330  | 2.52  | C_unshiu_00965 | 99152  | 97823  | 1330  | 1.21  | 99.85 |
| scaffold01009 | 1     | 17135 | 17135 | 32.57 | C_unshiu_00195 | 313600 | 296463 | 17138 | 5.04  | 99.96 |
| scaffold01009 | 18724 | 22053 | 3330  | 6.33  | C_unshiu_00583 | 112433 | 115759 | 3327  | 1.95  | 99.88 |
| scaffold01009 | 24786 | 39024 | 14239 | 27.06 | C_unshiu_00195 | 289681 | 275443 | 14239 | 4.19  | 99.99 |
| scaffold01009 | 39895 | 41854 | 1960  | 3.73  | C_unshiu_00195 | 331265 | 329306 | 1960  | 0.58  | 100   |
| scaffold01009 | 47106 | 51190 | 4085  | 7.76  | C_unshiu_00195 | 335408 | 331330 | 4079  | 1.2   | 98.9  |
| scaffold01009 | 51190 | 52616 | 1427  | 2.71  | C_unshiu_00195 | 323681 | 322261 | 1421  | 0.42  | 99.51 |
| scaffold01011 | 1     | 1087  | 1087  | 2.07  | C_unshiu_01113 | 27507  | 28597  | 1091  | 1.15  | 99.08 |
| scaffold01011 | 4092  | 12247 | 8156  | 15.52 | C_unshiu_01113 | 81092  | 72912  | 8181  | 8.65  | 99.27 |
| scaffold01011 | 12424 | 15869 | 3446  | 6.56  | C_unshiu_01113 | 72476  | 69031  | 3446  | 3.64  | 100   |
| scaffold01011 | 23952 | 27331 | 3380  | 6.43  | C_unshiu_01113 | 38377  | 41764  | 3388  | 3.58  | 98.32 |
| scaffold01011 | 28918 | 39620 | 10703 | 20.37 | C_unshiu_02657 | 18636  | 7966   | 10671 | 51.46 | 99.65 |
| scaffold01011 | 39626 | 43848 | 4223  | 8.04  | C_unshiu_02657 | 7488   | 3265   | 4224  | 20.37 | 99.01 |
| scaffold01011 | 48599 | 49676 | 1078  | 2.05  | C_unshiu_01113 | 25694  | 24616  | 1079  | 1.14  | 98.89 |
| scaffold01012 | 1     | 1537  | 1537  | 2.94  | C_unshiu_01203 | 235    | 1764   | 1530  | 1.79  | 98.25 |
| scaffold01012 | 3503  | 10479 | 6977  | 13.36 | C_unshiu_01203 | 4171   | 11145  | 6975  | 8.17  | 99.93 |
| scaffold01012 | 11539 | 15038 | 3500  | 6.7   | C_unshiu_01203 | 12729  | 16228  | 3500  | 4.1   | 100   |
| scaffold01012 | 15689 | 37206 | 21518 | 41.21 | C_unshiu_01203 | 17479  | 38997  | 21519 | 25.21 | 99.93 |
| scaffold01012 | 37201 | 42678 | 5478  | 10.49 | C_unshiu_01488 | 30899  | 25422  | 5478  | 8.59  | 100   |
| scaffold01012 | 43224 | 44714 | 1491  | 2.86  | C_unshiu_01203 | 44373  | 45863  | 1491  | 1.75  | 100   |
| scaffold01013 | 2009  | 5345  | 3337  | 6.39  | C_unshiu_00734 | 132740 | 136079 | 3340  | 2.42  | 99.73 |
| scaffold01013 | 4335  | 5345  | 1011  | 1.94  | C_unshiu_00331 | 41351  | 42362  | 1012  | 0.4   | 98.81 |
| scaffold01013 | 11030 | 32584 | 21555 | 41.29 | C_unshiu_00365 | 1      | 21562  | 21562 | 9.2   | 99.97 |
| scaffold01013 | 12593 | 48130 | 35538 | 68.08 | C_unshiu_00365 | 1564   | 37107  | 35544 | 15.16 | 99.97 |
| scaffold01013 | 48093 | 50263 | 2171  | 4.16  | C_unshiu_00365 | 37155  | 39325  | 2171  | 0.93  | 99.82 |
| scaffold01014 | 1     | 2539  | 2539  | 4.87  | C_unshiu_00860 | 108650 | 106112 | 2539  | 2.09  | 100   |
| scaffold01014 | 3048  | 4351  | 1304  | 2.5   | C_unshiu_00147 | 180740 | 179435 | 1306  | 0.33  | 99.62 |
| scaffold01014 | 5438  | 21153 | 15716 | 30.15 | C_unshiu_00860 | 102973 | 87250  | 15724 | 12.93 | 98.22 |
| scaffold01014 | 25625 | 36516 | 10892 | 20.9  | C_unshiu_00147 | 129956 | 119058 | 10899 | 2.79  | 98.61 |
| scaffold01014 | 40429 | 41638 | 1210  | 2.32  | C_unshiu_00860 | 56366  | 55157  | 1210  | 0.99  | 99.5  |
| scaffold01014 | 41656 | 52121 | 10466 | 20.08 | C_unshiu_00860 | 54410  | 43925  | 10486 | 8.62  | 99.12 |
| scaffold01016 | 13566 | 40389 | 26824 | 51.92 | C_unshiu_00769 | 37265  | 63948  | 26684 | 20.03 | 99.39 |
| scaffold01017 | 1     | 5487  | 5487  | 10.62 | C_unshiu_01658 | 47047  | 41562  | 5486  | 10.01 | 99.51 |
| scaffold01017 | 3264  | 5800  | 2537  | 4.91  | C_unshiu_01754 | 7387   | 4851   | 2537  | 5.04  | 99.37 |
| scaffold01017 | 16385 | 17567 | 1183  | 2.29  | C_unshiu_01658 | 30043  | 28861  | 1183  | 2.16  | 100   |
| scaffold01017 | 18848 | 44207 | 25360 | 49.1  | C_unshiu_01658 | 27006  | 1685   | 25322 | 46.22 | 99.6  |
| scaffold01017 | 44208 | 45891 | 1684  | 3.26  | C_unshiu_01658 | 1      | 1684   | 1684  | 3.07  | 100   |
| scaffold01019 | 1877  | 3850  | 1974  | 3.83  | C_unshiu_00684 | 69418  | 67445  | 1974  | 1.34  | 99.65 |
| scaffold01019 | 18586 | 22581 | 3996  | 7.76  | C_unshiu_00684 | 65008  | 61041  | 3968  | 2.68  | 98.03 |
| scaffold01019 | 23272 | 27816 | 4545  | 8.82  | C_unshiu_00684 | 60429  | 55886  | 4544  | 3.07  | 99.76 |
| scaffold01019 | 28513 | 33015 | 4503  | 8.74  | C_unshiu_00684 | 54826  | 50324  | 4503  | 3.05  | 100   |
| scaffold01019 | 34929 | 36837 | 1909  | 3.71  | C_unshiu_00684 | 47784  | 45876  | 1909  | 1.29  | 99.79 |
| scaffold01019 | 36835 | 37986 | 1152  | 2.24  | C_unshiu_00157 | 159450 | 160601 | 1152  | 0.31  | 100   |
| scaffold01019 | 40606 | 43524 | 2919  | 5.67  | C_unshiu_00684 | 42398  | 39479  | 2920  | 1.98  | 99.9  |
| scaffold01019 | 43525 | 47114 | 3590  | 6.97  | C_unshiu_00095 | 372275 | 375864 | 3590  | 0.77  | 100   |
| scaffold01019 | 47108 | 49334 | 2227  | 4.32  | C_unshiu_00793 | 117895 | 115668 | 2228  | 1.73  | 99.19 |
| scaffold01019 | 47808 | 49719 | 1912  | 3.71  | C_unshiu_00684 | 35253  | 33336  | 1918  | 1.3   | 99.22 |
| scaffold01020 | 2740  | 13205 | 10466 | 20.34 | C_unshiu_01314 | 373    | 10756  | 10384 | 13.66 | 98.89 |
| scaffold01020 | 13731 | 28511 | 14781 | 28.73 | C_unshiu_01314 | 11745  | 26592  | 14848 | 19.53 | 98.77 |
| scaffold01020 | 28801 | 50002 | 21202 | 41.21 | C_unshiu_01314 | 26636  | 47844  | 21209 | 27.9  | 99.65 |
| scaffold01020 | 50099 | 51449 | 1351  | 2.63  | C_unshiu_01314 | 47925  | 49277  | 1353  | 1.78  | 99.56 |
| scaffold01021 | 4977  | 19350 | 14374 | 28.07 | C_unshiu_01442 | 67277  | 52843  | 14435 | 21.45 | 98.01 |
| scaffold01021 | 30581 | 31611 | 1031  | 2.01  | C_unshiu_00574 | 108658 | 107628 | 1031  | 0.6   | 100   |
| scaffold01022 | 11870 | 19763 | 7894  | 15.44 | C_unshiu_01390 | 53410  | 45506  | 7905  | 11.14 | 98.06 |
| scaffold01022 | 42555 | 43683 | 1129  | 2.21  | C_unshiu_01390 | 26123  | 24995  | 1129  | 1.59  | 100   |
| scaffold01022 | 44882 | 46250 | 1369  | 2.68  | C_unshiu_01390 | 23553  | 22185  | 1369  | 1.93  | 100   |
| scaffold01022 | 46868 | 48545 | 1678  | 3.28  | C_unshiu_01390 | 21267  | 19590  | 1678  | 2.36  | 100   |
| scaffold01023 | 1     | 1145  | 1145  | 2.25  | C_unshiu_01457 | 39545  | 40689  | 1145  | 1.73  | 100   |
| scaffold01023 | 3595  | 10040 | 6446  | 12.65 | C_unshiu_01457 | 40963  | 47425  | 6463  | 9.79  | 99.49 |
| scaffold01023 | 15675 | 18356 | 2682  | 5.26  | C_unshiu_01457 | 56753  | 59430  | 2678  | 4.06  | 98.07 |
| scaffold01023 | 17369 | 18791 | 1423  | 2.79  | C_unshiu_01640 | 23466  | 24888  | 1423  | 2.56  | 100   |
| scaffold01023 | 39341 | 40675 | 1335  | 2.62  | C_unshiu_01640 | 43679  | 45030  | 1352  | 2.44  | 98.08 |
| scaffold01023 | 49849 | 50966 | 1118  | 2.19  | C_unshiu_00563 | 175133 | 174011 | 1123  | 0.64  | 99.02 |
| scaffold01024 | 1939  | 3109  | 1171  | 2.3   | C_unshiu_01007 | 29212  | 30387  | 1176  | 1.12  | 99.15 |
| scaffold01024 | 9075  | 11085 | 2011  | 3.95  | C_unshiu_01007 | 9315   | 7305   | 2011  | 1.91  | 99.7  |
| scaffold01024 | 9770  | 11085 | 1316  | 2.58  | C_unshiu_00551 | 166494 | 167813 | 1320  | 0.74  | 98.64 |
| scaffold01024 | 12682 | 14249 | 1568  | 3.08  | C_unshiu_00551 | 169827 | 171394 | 1568  | 0.88  | 99.87 |
| scaffold01024 | 15098 | 16475 | 1378  | 2.71  | C_unshiu_00551 | 172012 | 173389 | 1378  | 0.77  | 100   |
| scaffold01024 | 17279 | 21058 | 3780  | 7.42  | C_unshiu_00551 | 174711 | 178489 | 3779  | 2.12  | 99.97 |
| scaffold01024 | 23382 | 44089 | 20708 | 40.67 | C_unshiu_02329 | 1797   | 22574  | 20778 | 71.74 | 99.61 |
| scaffold01024 | 46557 | 47977 | 1421  | 2.79  | C_unshiu_02329 | 25164  | 26560  | 1397  | 4.82  | 98.1  |
| scaffold01024 | 49283 | 50815 | 1533  | 3.01  | C_unshiu_01007 | 20269  | 18748  | 1522  | 1.45  | 99.02 |
| scaffold01026 | 30395 | 31800 | 1406  | 2.79  | C_unshiu_00308 | 196858 | 195453 | 1406  | 0.54  | 98.86 |

|               |       |       |       |       |                |        |        |       |       |       |
|---------------|-------|-------|-------|-------|----------------|--------|--------|-------|-------|-------|
| scaffold01026 | 34306 | 35800 | 1495  | 2.96  | C_unshiu_00308 | 194380 | 192891 | 1490  | 0.57  | 98.66 |
| scaffold01026 | 37022 | 39579 | 2558  | 5.07  | C_unshiu_00308 | 191721 | 189164 | 2558  | 0.98  | 98.24 |
| scaffold01026 | 48670 | 50457 | 1788  | 3.54  | C_unshiu_00308 | 189108 | 187321 | 1788  | 0.68  | 98.99 |
| scaffold01027 | 949   | 2341  | 1393  | 2.76  | C_unshiu_01382 | 28564  | 27172  | 1393  | 1.95  | 100   |
| scaffold01027 | 21283 | 42728 | 21446 | 42.53 | C_unshiu_00270 | 256193 | 277591 | 21399 | 7.62  | 99.45 |
| scaffold01027 | 42729 | 49689 | 6961  | 13.8  | C_unshiu_00290 | 204802 | 197842 | 6961  | 2.57  | 100   |
| scaffold01028 | 1     | 1028  | 1028  | 2.04  | C_unshiu_00528 | 89356  | 88329  | 1028  | 0.56  | 99.22 |
| scaffold01028 | 2369  | 4066  | 1698  | 3.37  | C_unshiu_00831 | 29431  | 27734  | 1698  | 1.36  | 100   |
| scaffold01028 | 9291  | 13519 | 4229  | 8.39  | C_unshiu_00831 | 21938  | 17661  | 4278  | 3.43  | 98.81 |
| scaffold01028 | 14017 | 17250 | 3234  | 6.42  | C_unshiu_01194 | 68200  | 71433  | 3234  | 3.75  | 100   |
| scaffold01028 | 17809 | 22331 | 4523  | 8.98  | C_unshiu_00831 | 13961  | 9441   | 4521  | 3.62  | 99.96 |
| scaffold01028 | 23498 | 24799 | 1302  | 2.58  | C_unshiu_00298 | 174768 | 173467 | 1302  | 0.49  | 100   |
| scaffold01028 | 35106 | 37592 | 2487  | 4.94  | C_unshiu_00700 | 109205 | 106716 | 2490  | 1.73  | 98.84 |
| scaffold01028 | 39446 | 41494 | 2049  | 4.07  | C_unshiu_00387 | 76676  | 78725  | 2050  | 0.91  | 99.76 |
| scaffold01029 | 1214  | 2255  | 1042  | 2.07  | C_unshiu_00355 | 218692 | 219736 | 1045  | 0.44  | 99.62 |
| scaffold01029 | 13392 | 22773 | 9382  | 18.64 | C_unshiu_01934 | 15105  | 24487  | 9383  | 21.62 | 99.65 |
| scaffold01029 | 23739 | 28721 | 4983  | 9.9   | C_unshiu_01934 | 38131  | 33125  | 5007  | 11.54 | 99.42 |
| scaffold01029 | 35867 | 38330 | 2464  | 4.89  | C_unshiu_02469 | 4298   | 6749   | 2452  | 9.61  | 98.22 |
| scaffold01029 | 38343 | 39952 | 1610  | 3.2   | C_unshiu_02469 | 8400   | 10011  | 1612  | 6.32  | 99.57 |
| scaffold01029 | 45890 | 48689 | 2800  | 5.56  | C_unshiu_02469 | 16563  | 19358  | 2796  | 10.96 | 99.11 |
| scaffold01030 | 7964  | 9838  | 1875  | 3.73  | C_unshiu_01490 | 10577  | 12451  | 1875  | 2.94  | 99.41 |
| scaffold01030 | 30119 | 32067 | 1949  | 3.88  | C_unshiu_01490 | 32880  | 34826  | 1947  | 3.05  | 99.9  |
| scaffold01030 | 33016 | 36344 | 3329  | 6.62  | C_unshiu_01490 | 36147  | 39477  | 3331  | 5.22  | 99.67 |
| scaffold01030 | 36334 | 38236 | 1903  | 3.79  | C_unshiu_00147 | 44871  | 42969  | 1903  | 0.49  | 99.95 |
| scaffold01030 | 38238 | 39343 | 1106  | 2.2   | C_unshiu_01490 | 42044  | 43142  | 1099  | 1.72  | 98.74 |
| scaffold01030 | 39452 | 41816 | 2365  | 4.71  | C_unshiu_01490 | 43293  | 45672  | 2380  | 3.73  | 99.03 |
| scaffold01030 | 42185 | 44327 | 2143  | 4.26  | C_unshiu_00911 | 107271 | 109414 | 2144  | 1.85  | 99.95 |
| scaffold01030 | 46921 | 50160 | 3240  | 6.45  | C_unshiu_00911 | 110674 | 113905 | 3232  | 2.79  | 99.32 |
| scaffold01031 | 33822 | 34899 | 1078  | 2.15  | C_unshiu_01061 | 21170  | 20091  | 1080  | 1.09  | 98.8  |
| scaffold01031 | 35501 | 40038 | 4538  | 9.06  | C_unshiu_01061 | 19179  | 14638  | 4542  | 4.59  | 99.82 |
| scaffold01031 | 40929 | 44538 | 3610  | 7.21  | C_unshiu_01061 | 13347  | 9715   | 3633  | 3.67  | 99.04 |
| scaffold01031 | 44548 | 45984 | 1437  | 2.87  | C_unshiu_01061 | 8882   | 7446   | 1437  | 1.45  | 99.23 |
| scaffold01032 | 7913  | 25408 | 17496 | 35.19 | C_unshiu_01365 | 17491  | 1      | 17491 | 23.84 | 99.87 |
| scaffold01032 | 29669 | 32098 | 2430  | 4.89  | C_unshiu_01199 | 41629  | 44061  | 2433  | 2.84  | 98.07 |
| scaffold01032 | 30833 | 32103 | 1271  | 2.56  | C_unshiu_00113 | 419614 | 418344 | 1271  | 0.29  | 98.58 |
| scaffold01032 | 34810 | 40408 | 5599  | 11.26 | C_unshiu_01342 | 14462  | 20060  | 5599  | 7.52  | 99.66 |
| scaffold01032 | 41375 | 45015 | 3641  | 7.32  | C_unshiu_01342 | 20910  | 24550  | 3641  | 4.89  | 100   |
| scaffold01032 | 45006 | 48975 | 3970  | 7.98  | C_unshiu_00707 | 124280 | 120310 | 3971  | 2.78  | 99.97 |
| scaffold01033 | 6     | 3068  | 3063  | 6.19  | C_unshiu_01116 | 3109   | 39     | 3071  | 3.26  | 98.41 |
| scaffold01033 | 16786 | 31976 | 15191 | 30.69 | C_unshiu_02000 | 1      | 15198  | 15198 | 37.48 | 99.45 |
| scaffold01033 | 39325 | 41124 | 1800  | 3.64  | C_unshiu_00245 | 136143 | 134344 | 1800  | 0.6   | 100   |
| scaffold01034 | 8824  | 10281 | 1458  | 2.96  | C_unshiu_00458 | 142223 | 143681 | 1459  | 0.71  | 99.18 |
| scaffold01034 | 10996 | 28940 | 17945 | 36.4  | C_unshiu_00458 | 144948 | 162895 | 17948 | 8.74  | 99.91 |
| scaffold01034 | 37326 | 49294 | 11969 | 24.28 | C_unshiu_02018 | 39985  | 28025  | 11961 | 29.91 | 99.62 |
| scaffold01035 | 8224  | 9856  | 1633  | 3.32  | C_unshiu_00345 | 18698  | 17066  | 1633  | 0.66  | 99.94 |
| scaffold01036 | 2049  | 3384  | 1336  | 2.72  | C_unshiu_01150 | 78612  | 79947  | 1336  | 1.47  | 99.85 |
| scaffold01036 | 5616  | 13038 | 7423  | 15.1  | C_unshiu_00879 | 84089  | 91496  | 7408  | 6.2   | 99.61 |
| scaffold01036 | 17341 | 23136 | 5796  | 11.79 | C_unshiu_01056 | 76390  | 82187  | 5798  | 5.82  | 99.93 |
| scaffold01036 | 23308 | 24839 | 1532  | 3.12  | C_unshiu_01056 | 82598  | 84126  | 1529  | 1.53  | 99.28 |
| scaffold01036 | 27875 | 32747 | 4873  | 9.92  | C_unshiu_01056 | 85963  | 90834  | 4872  | 4.89  | 99.14 |
| scaffold01036 | 32884 | 35599 | 2716  | 5.53  | C_unshiu_01056 | 91281  | 93998  | 2718  | 2.73  | 99.85 |
| scaffold01036 | 35620 | 37031 | 1412  | 2.87  | C_unshiu_01056 | 94264  | 95676  | 1413  | 1.42  | 99.43 |
| scaffold01036 | 38029 | 39872 | 1844  | 3.75  | C_unshiu_01056 | 97797  | 99648  | 1852  | 1.86  | 98.01 |
| scaffold01036 | 48005 | 49147 | 1143  | 2.33  | C_unshiu_00879 | 51360  | 52502  | 1143  | 0.96  | 99.83 |
| scaffold01037 | 14    | 9390  | 9377  | 19.09 | C_unshiu_02302 | 19919  | 29344  | 9426  | 31.63 | 98.93 |
| scaffold01037 | 28121 | 49132 | 21012 | 42.77 | C_unshiu_01499 | 27244  | 48271  | 21028 | 33.2  | 99.92 |
| scaffold01038 | 1     | 3942  | 3942  | 8.04  | C_unshiu_01604 | 54584  | 50639  | 3946  | 6.9   | 99.87 |
| scaffold01038 | 9993  | 19492 | 9500  | 19.37 | C_unshiu_01604 | 43937  | 34402  | 9536  | 16.67 | 98.41 |
| scaffold01038 | 16634 | 19494 | 2861  | 5.83  | C_unshiu_00399 | 187486 | 190348 | 2863  | 1.28  | 98.78 |
| scaffold01038 | 22843 | 30621 | 7779  | 15.86 | C_unshiu_00399 | 191622 | 199400 | 7779  | 3.48  | 99.88 |
| scaffold01038 | 30627 | 45838 | 15212 | 31.02 | C_unshiu_00399 | 200853 | 216058 | 15206 | 6.81  | 99.7  |
| scaffold01039 | 832   | 9977  | 9146  | 18.69 | C_unshiu_00746 | 84948  | 94092  | 9145  | 6.69  | 99.65 |
| scaffold01039 | 15815 | 46505 | 30691 | 62.72 | C_unshiu_00746 | 99634  | 130309 | 30676 | 22.43 | 99.58 |
| scaffold01040 | 9223  | 13089 | 3867  | 7.93  | C_unshiu_01877 | 10174  | 14043  | 3870  | 8.51  | 99.82 |
| scaffold01040 | 15305 | 19866 | 4562  | 9.36  | C_unshiu_01492 | 22512  | 27025  | 4514  | 7.09  | 98.64 |
| scaffold01040 | 20763 | 38724 | 17962 | 36.85 | C_unshiu_01492 | 28142  | 46218  | 18077 | 28.39 | 98.21 |
| scaffold01041 | 1     | 1690  | 1690  | 3.47  | C_unshiu_00464 | 98704  | 97015  | 1690  | 0.83  | 99.64 |
| scaffold01041 | 1971  | 23309 | 21339 | 43.84 | C_unshiu_00851 | 10669  | 32006  | 21338 | 17.41 | 98.56 |
| scaffold01041 | 23850 | 47769 | 23920 | 49.14 | C_unshiu_00851 | 31997  | 55905  | 23909 | 19.51 | 99.81 |
| scaffold01042 | 1     | 8783  | 8783  | 18.11 | C_unshiu_01399 | 8784   | 1      | 8784  | 12.47 | 99.98 |
| scaffold01042 | 676   | 47967 | 47292 | 97.49 | C_unshiu_01772 | 49505  | 2192   | 47314 | 95.57 | 99.95 |
| scaffold01043 | 1     | 1163  | 1163  | 2.4   | C_unshiu_01303 | 76822  | 75666  | 1157  | 1.5   | 98.8  |
| scaffold01043 | 5927  | 8375  | 2449  | 5.05  | C_unshiu_01303 | 70812  | 68371  | 2442  | 3.16  | 99.55 |
| scaffold01043 | 9095  | 14144 | 5050  | 10.41 | C_unshiu_01897 | 42366  | 37320  | 5047  | 11.26 | 99.86 |
| scaffold01043 | 14735 | 22537 | 7803  | 16.09 | C_unshiu_01303 | 32199  | 24441  | 7759  | 10.04 | 98.67 |
| scaffold01043 | 22665 | 25424 | 2760  | 5.69  | C_unshiu_01303 | 24260  | 21500  | 2761  | 3.57  | 98.41 |
| scaffold01043 | 22665 | 25424 | 2760  | 5.69  | C_unshiu_01303 | 61043  | 58283  | 2761  | 3.57  | 99.46 |
| scaffold01043 | 25544 | 26570 | 1027  | 2.12  | C_unshiu_01303 | 21202  | 20176  | 1027  | 1.33  | 98.25 |
| scaffold01043 | 26603 | 29948 | 3346  | 6.9   | C_unshiu_01303 | 19902  | 16561  | 3342  | 4.32  | 98.27 |

|               |       |       |       |       |                |         |         |       |       |       |
|---------------|-------|-------|-------|-------|----------------|---------|---------|-------|-------|-------|
| scaffold01043 | 37653 | 39941 | 2289  | 4.72  | C_unshiu_01897 | 19574   | 17290   | 2285  | 5.1   | 98.17 |
| scaffold01044 | 1     | 1438  | 1438  | 2.97  | C_unshiu_01505 | 12347   | 10909   | 1439  | 2.29  | 99.93 |
| scaffold01044 | 2533  | 4828  | 2296  | 4.74  | C_unshiu_01505 | 10586   | 8319    | 2268  | 3.6   | 98.26 |
| scaffold01044 | 7547  | 9834  | 2288  | 4.72  | C_unshiu_01505 | 6699    | 4411    | 2289  | 3.63  | 99.65 |
| scaffold01044 | 14145 | 33861 | 19717 | 40.69 | C_unshiu_00418 | 19113   | 38722   | 19610 | 8.94  | 98.36 |
| scaffold01044 | 34560 | 35780 | 1221  | 2.52  | C_unshiu_00418 | 39023   | 40241   | 1219  | 0.56  | 99.34 |
| scaffold01045 | 1     | 5198  | 5198  | 10.73 | C_unshiu_00066 | 441751  | 436586  | 5166  | 0.94  | 98.22 |
| scaffold01045 | 21532 | 24610 | 3079  | 6.36  | C_unshiu_00492 | 40304   | 37237   | 3068  | 1.57  | 99.61 |
| scaffold01045 | 25149 | 36983 | 11835 | 24.44 | C_unshiu_00492 | 36364   | 24581   | 11784 | 6.05  | 98.85 |
| scaffold01045 | 37495 | 47373 | 9879  | 20.4  | C_unshiu_00492 | 24264   | 14392   | 9873  | 5.07  | 99.52 |
| scaffold01047 | 3812  | 5409  | 1598  | 3.31  | C_unshiu_01723 | 28687   | 30284   | 1598  | 3.09  | 99.06 |
| scaffold01047 | 5782  | 8009  | 2228  | 4.62  | C_unshiu_01723 | 31008   | 33235   | 2228  | 4.3   | 99.69 |
| scaffold01047 | 8531  | 11356 | 2826  | 5.86  | C_unshiu_00452 | 168476  | 171301  | 2826  | 1.36  | 100   |
| scaffold01047 | 12513 | 15247 | 2735  | 5.67  | C_unshiu_01723 | 37110   | 39844   | 2735  | 5.28  | 100   |
| scaffold01047 | 16276 | 18557 | 2282  | 4.73  | C_unshiu_00452 | 172190  | 174471  | 2282  | 1.1   | 99.96 |
| scaffold01047 | 19123 | 23456 | 4334  | 8.99  | C_unshiu_01723 | 41068   | 45404   | 4337  | 8.38  | 99.26 |
| scaffold01047 | 23836 | 26422 | 2587  | 5.37  | C_unshiu_01723 | 46229   | 48815   | 2587  | 5     | 100   |
| scaffold01047 | 31971 | 33854 | 1884  | 3.91  | C_unshiu_01723 | 44851   | 46733   | 1883  | 3.64  | 98.3  |
| scaffold01047 | 33879 | 35961 | 2083  | 4.32  | C_unshiu_01666 | 9526    | 7444    | 2083  | 3.83  | 99.71 |
| scaffold01047 | 44911 | 46998 | 2088  | 4.33  | C_unshiu_01666 | 5991    | 3904    | 2088  | 3.84  | 99.71 |
| scaffold01048 | 1235  | 10084 | 8850  | 18.37 | C_unshiu_00896 | 68382   | 77205   | 8824  | 7.5   | 98.77 |
| scaffold01048 | 10085 | 14132 | 4048  | 8.4   | C_unshiu_01085 | 13111   | 17158   | 4048  | 4.15  | 100   |
| scaffold01048 | 14123 | 16741 | 2619  | 5.43  | C_unshiu_00896 | 81519   | 84144   | 2626  | 2.23  | 98.33 |
| scaffold01048 | 18271 | 36547 | 18277 | 37.93 | C_unshiu_00896 | 85038   | 103290  | 18253 | 15.51 | 99.63 |
| scaffold01048 | 38390 | 41358 | 2969  | 6.16  | C_unshiu_00896 | 105452  | 108416  | 2965  | 2.52  | 99.36 |
| scaffold01048 | 42345 | 48189 | 5845  | 12.13 | C_unshiu_00896 | 109774  | 115618  | 5845  | 4.97  | 99.86 |
| scaffold01049 | 1     | 3905  | 3905  | 8.12  | C_unshiu_00897 | 82266   | 86172   | 3907  | 3.33  | 99.82 |
| scaffold01049 | 8526  | 13513 | 4988  | 10.37 | C_unshiu_00897 | 89758   | 94745   | 4988  | 4.25  | 100   |
| scaffold01049 | 21910 | 23973 | 2064  | 4.29  | C_unshiu_00001 | 2570985 | 2568926 | 2060  | 0.08  | 98.36 |
| scaffold01049 | 28675 | 30141 | 1467  | 3.05  | C_unshiu_01848 | 11462   | 9996    | 1467  | 3.15  | 100   |
| scaffold01049 | 29473 | 43705 | 14233 | 29.58 | C_unshiu_01848 | 27992   | 13760   | 14233 | 30.58 | 99.77 |
| scaffold01049 | 45902 | 48115 | 2214  | 4.6   | C_unshiu_01848 | 13645   | 11436   | 2210  | 4.75  | 99.55 |
| scaffold01050 | 11252 | 13670 | 2419  | 5.05  | C_unshiu_00267 | 130733  | 128315  | 2419  | 0.86  | 100   |
| scaffold01050 | 15881 | 24891 | 9011  | 18.83 | C_unshiu_00267 | 125548  | 116538  | 9011  | 3.19  | 100   |
| scaffold01050 | 25094 | 26584 | 1491  | 3.12  | C_unshiu_00267 | 116184  | 114694  | 1491  | 0.53  | 99.66 |
| scaffold01050 | 27294 | 32522 | 5229  | 10.93 | C_unshiu_00267 | 113821  | 108593  | 5229  | 1.85  | 99.9  |
| scaffold01050 | 32739 | 34534 | 1796  | 3.75  | C_unshiu_00267 | 108210  | 106406  | 1805  | 0.64  | 99.17 |
| scaffold01050 | 35943 | 37021 | 1079  | 2.25  | C_unshiu_01169 | 2839    | 3918    | 1080  | 1.22  | 99.17 |
| scaffold01050 | 39533 | 42536 | 3004  | 6.28  | C_unshiu_01169 | 7407    | 10414   | 3008  | 3.4   | 99.7  |
| scaffold01050 | 46462 | 47855 | 1394  | 2.91  | C_unshiu_01169 | 14397   | 15781   | 1385  | 1.57  | 98.14 |
| scaffold01051 | 7463  | 8609  | 1147  | 2.41  | C_unshiu_02922 | 3918    | 2771    | 1148  | 7.52  | 99.83 |
| scaffold01051 | 12964 | 14363 | 1400  | 2.94  | C_unshiu_02355 | 5746    | 7130    | 1385  | 4.9   | 98    |
| scaffold01051 | 18801 | 26037 | 7237  | 15.2  | C_unshiu_02355 | 7085    | 14288   | 7204  | 25.5  | 98.88 |
| scaffold01051 | 33207 | 43084 | 9878  | 20.75 | C_unshiu_01151 | 31078   | 40916   | 9839  | 10.84 | 99.42 |
| scaffold01051 | 40711 | 47608 | 6898  | 14.49 | C_unshiu_00267 | 282487  | 275589  | 6899  | 2.44  | 99.31 |
| scaffold01052 | 595   | 2982  | 2388  | 5.04  | C_unshiu_00384 | 6045    | 8433    | 2389  | 1.05  | 99.96 |
| scaffold01052 | 3004  | 5613  | 2610  | 5.51  | C_unshiu_00384 | 10644   | 13260   | 2617  | 1.15  | 99.66 |
| scaffold01052 | 3004  | 5613  | 2610  | 5.51  | C_unshiu_02223 | 5753    | 3142    | 2612  | 8.03  | 99.85 |
| scaffold01052 | 5877  | 36068 | 30192 | 63.69 | C_unshiu_00384 | 13648   | 43856   | 30209 | 13.3  | 99.67 |
| scaffold01052 | 36440 | 39083 | 2644  | 5.58  | C_unshiu_01630 | 26938   | 29581   | 2644  | 4.72  | 100   |
| scaffold01053 | 1     | 7564  | 7564  | 15.99 | C_unshiu_01386 | 58509   | 50911   | 7599  | 10.67 | 99.17 |
| scaffold01053 | 8147  | 24215 | 16069 | 33.97 | C_unshiu_01386 | 50151   | 34067   | 16085 | 22.58 | 99.64 |
| scaffold01053 | 21730 | 30647 | 8918  | 18.85 | C_unshiu_01125 | 71428   | 62487   | 8942  | 9.57  | 98.02 |
| scaffold01053 | 30645 | 41917 | 11273 | 23.83 | C_unshiu_01125 | 62053   | 50733   | 11321 | 12.12 | 99.51 |
| scaffold01053 | 42417 | 43689 | 1273  | 2.69  | C_unshiu_01125 | 50072   | 48806   | 1267  | 1.36  | 98.67 |
| scaffold01053 | 44185 | 47291 | 3107  | 6.57  | C_unshiu_01125 | 48437   | 45350   | 3088  | 3.31  | 98.59 |
| scaffold01054 | 9128  | 47145 | 38018 | 80.64 | C_unshiu_01136 | 53256   | 91262   | 38007 | 41.2  | 99.84 |
| scaffold01055 | 2461  | 9055  | 6595  | 14    | C_unshiu_00489 | 53851   | 47221   | 6631  | 3.38  | 98.21 |
| scaffold01055 | 10097 | 17623 | 7527  | 15.97 | C_unshiu_00489 | 45985   | 38458   | 7528  | 3.84  | 99.8  |
| scaffold01055 | 17763 | 25115 | 7353  | 15.61 | C_unshiu_00489 | 38377   | 31027   | 7351  | 3.75  | 99.89 |
| scaffold01055 | 25658 | 29485 | 3828  | 8.12  | C_unshiu_00489 | 30052   | 26233   | 3820  | 1.95  | 99.76 |
| scaffold01055 | 29928 | 40180 | 10253 | 21.76 | C_unshiu_00489 | 25417   | 15174   | 10244 | 5.23  | 99.07 |
| scaffold01055 | 43728 | 47119 | 3392  | 7.2   | C_unshiu_00489 | 11817   | 8426    | 3392  | 1.73  | 100   |
| scaffold01056 | 4501  | 5926  | 1426  | 3.03  | C_unshiu_02938 | 1884    | 3309    | 1426  | 9.68  | 100   |
| scaffold01056 | 7957  | 9910  | 1954  | 4.16  | C_unshiu_02938 | 4901    | 6854    | 1954  | 13.26 | 100   |
| scaffold01056 | 13396 | 14854 | 1459  | 3.1   | C_unshiu_01198 | 26152   | 27611   | 1460  | 1.7   | 99.38 |
| scaffold01056 | 15417 | 17009 | 1593  | 3.39  | C_unshiu_01198 | 25139   | 26731   | 1593  | 1.86  | 99.5  |
| scaffold01056 | 20350 | 25020 | 4671  | 9.93  | C_unshiu_02548 | 23303   | 18636   | 4668  | 20.03 | 98.91 |
| scaffold01056 | 27938 | 31979 | 4042  | 8.6   | C_unshiu_01198 | 45516   | 49559   | 4044  | 4.71  | 99.58 |
| scaffold01056 | 36381 | 42276 | 5896  | 12.54 | C_unshiu_02548 | 13078   | 7183    | 5896  | 25.3  | 99.97 |
| scaffold01056 | 44760 | 47018 | 2259  | 4.8   | C_unshiu_02548 | 4760    | 2500    | 2261  | 9.7   | 99.56 |
| scaffold01057 | 4298  | 6543  | 2246  | 4.79  | C_unshiu_00467 | 144723  | 146974  | 2252  | 1.11  | 99.11 |
| scaffold01057 | 7554  | 11602 | 4049  | 8.63  | C_unshiu_02312 | 5944    | 9976    | 4033  | 13.64 | 98.65 |
| scaffold01057 | 8593  | 13766 | 5174  | 11.02 | C_unshiu_00329 | 247291  | 252468  | 5178  | 2.05  | 99.56 |
| scaffold01057 | 21645 | 27489 | 5845  | 12.45 | C_unshiu_02860 | 16565   | 10721   | 5845  | 35.29 | 99.85 |
| scaffold01057 | 27483 | 32064 | 4582  | 9.76  | C_unshiu_00309 | 225649  | 230230  | 4582  | 1.76  | 100   |
| scaffold01057 | 34456 | 38174 | 3719  | 7.92  | C_unshiu_02860 | 3719    | 1       | 3719  | 22.45 | 100   |
| scaffold01057 | 42200 | 44050 | 1851  | 3.94  | C_unshiu_02116 | 35988   | 34138   | 1851  | 5.14  | 99.84 |
| scaffold01058 | 9294  | 12500 | 3207  | 6.86  | C_unshiu_02907 | 4442    | 1232    | 3211  | 20.61 | 99.56 |

|               |       |       |       |       |                |        |        |       |       |       |
|---------------|-------|-------|-------|-------|----------------|--------|--------|-------|-------|-------|
| scaffold01058 | 15923 | 20490 | 4568  | 9.77  | C_unshiu_00859 | 24856  | 20277  | 4580  | 3.76  | 99.26 |
| scaffold01058 | 29209 | 39207 | 9999  | 21.38 | C_unshiu_00175 | 277940 | 287937 | 9998  | 2.76  | 99.71 |
| scaffold01058 | 44226 | 46765 | 2540  | 5.43  | C_unshiu_00175 | 293483 | 296022 | 2540  | 0.7   | 100   |
| scaffold01059 | 5     | 1105  | 1101  | 2.36  | C_unshiu_02225 | 1      | 1098   | 1098  | 3.38  | 99.73 |
| scaffold01059 | 1528  | 11664 | 10137 | 21.69 | C_unshiu_02225 | 1500   | 11640  | 10141 | 31.24 | 99.68 |
| scaffold01059 | 17118 | 30141 | 13024 | 27.86 | C_unshiu_02225 | 16554  | 29578  | 13025 | 40.13 | 99.88 |
| scaffold01060 | 926   | 2891  | 1966  | 4.21  | C_unshiu_00502 | 93825  | 91860  | 1966  | 1.03  | 100   |
| scaffold01060 | 15285 | 19137 | 3853  | 8.25  | C_unshiu_02501 | 22277  | 18423  | 3855  | 15.68 | 99.4  |
| scaffold01060 | 19131 | 23759 | 4629  | 9.91  | C_unshiu_00894 | 62217  | 57589  | 4629  | 3.93  | 100   |
| scaffold01060 | 25781 | 33994 | 8214  | 17.58 | C_unshiu_02501 | 11996  | 3895   | 8102  | 32.95 | 98.39 |
| scaffold01060 | 35533 | 37676 | 2144  | 4.59  | C_unshiu_00774 | 123078 | 120955 | 2124  | 1.61  | 98.7  |
| scaffold01060 | 37836 | 39633 | 1798  | 3.85  | C_unshiu_00774 | 120669 | 118904 | 1766  | 1.34  | 98.11 |
| scaffold01060 | 40426 | 46343 | 5918  | 12.67 | C_unshiu_01461 | 32804  | 26887  | 5918  | 8.98  | 100   |
| scaffold01061 | 1     | 1264  | 1264  | 2.71  | C_unshiu_00530 | 102478 | 103727 | 1250  | 0.68  | 98.5  |
| scaffold01061 | 4207  | 7210  | 3004  | 6.44  | C_unshiu_00530 | 107871 | 110889 | 3019  | 1.64  | 98.34 |
| scaffold01061 | 7252  | 10410 | 3159  | 6.77  | C_unshiu_02384 | 15995  | 12822  | 3174  | 11.51 | 99.31 |
| scaffold01061 | 12944 | 14854 | 1911  | 4.1   | C_unshiu_02384 | 10728  | 8817   | 1912  | 6.93  | 99.9  |
| scaffold01061 | 22656 | 23869 | 1214  | 2.6   | C_unshiu_02384 | 8896   | 7684   | 1213  | 4.4   | 99.67 |
| scaffold01061 | 27640 | 30043 | 2404  | 5.16  | C_unshiu_00530 | 123145 | 125550 | 2406  | 1.31  | 99.79 |
| scaffold01061 | 30222 | 33648 | 3427  | 7.35  | C_unshiu_00530 | 126047 | 129478 | 3432  | 1.86  | 99.8  |
| scaffold01061 | 36045 | 39522 | 3478  | 7.46  | C_unshiu_00530 | 132418 | 135895 | 3478  | 1.89  | 100   |
| scaffold01061 | 39907 | 43240 | 3334  | 7.15  | C_unshiu_01179 | 23269  | 26600  | 3332  | 3.81  | 99.25 |
| scaffold01061 | 39907 | 43258 | 3352  | 7.19  | C_unshiu_01179 | 29908  | 26595  | 3314  | 3.79  | 98.39 |
| scaffold01062 | 3263  | 4705  | 1443  | 3.1   | C_unshiu_00185 | 3369   | 4810   | 1442  | 0.42  | 99.17 |
| scaffold01062 | 8172  | 9312  | 1141  | 2.45  | C_unshiu_00185 | 8474   | 9607   | 1134  | 0.33  | 99.39 |
| scaffold01062 | 9403  | 13006 | 3604  | 7.75  | C_unshiu_00185 | 9726   | 13329  | 3604  | 1.04  | 100   |
| scaffold01062 | 13114 | 21797 | 8684  | 18.67 | C_unshiu_00185 | 13901  | 22581  | 8681  | 2.5   | 98.93 |
| scaffold01062 | 23522 | 24664 | 1143  | 2.46  | C_unshiu_00185 | 24377  | 25519  | 1143  | 0.33  | 100   |
| scaffold01063 | 20641 | 32275 | 11635 | 25.06 | C_unshiu_00266 | 169200 | 180861 | 11662 | 4.1   | 98.27 |
| scaffold01063 | 32276 | 33582 | 1307  | 2.81  | C_unshiu_00266 | 188665 | 189969 | 1305  | 0.46  | 99.54 |
| scaffold01063 | 45248 | 46343 | 1096  | 2.36  | C_unshiu_00266 | 205895 | 206994 | 1100  | 0.39  | 98.18 |
| scaffold01064 | 1029  | 34085 | 33057 | 71.21 | C_unshiu_00379 | 172229 | 139190 | 33040 | 14.34 | 98.34 |
| scaffold01067 | 1785  | 3185  | 1401  | 3.03  | C_unshiu_01369 | 23594  | 22198  | 1397  | 1.91  | 98.08 |
| scaffold01067 | 6442  | 8445  | 2004  | 4.33  | C_unshiu_01636 | 49030  | 47027  | 2004  | 3.6   | 99.2  |
| scaffold01067 | 19394 | 21048 | 1655  | 3.58  | C_unshiu_00106 | 336388 | 338047 | 1660  | 0.37  | 99.7  |
| scaffold01068 | 21500 | 27343 | 5844  | 12.65 | C_unshiu_00994 | 25564  | 31428  | 5865  | 5.48  | 98.98 |
| scaffold01068 | 26103 | 29009 | 2907  | 6.29  | C_unshiu_02138 | 30531  | 33440  | 2910  | 8.23  | 99.55 |
| scaffold01068 | 29034 | 34118 | 5085  | 11.01 | C_unshiu_00994 | 32385  | 37437  | 5053  | 4.72  | 98.98 |
| scaffold01068 | 35562 | 36623 | 1062  | 2.3   | C_unshiu_00994 | 38866  | 39927  | 1062  | 0.99  | 99.91 |
| scaffold01069 | 9326  | 11269 | 1944  | 4.21  | C_unshiu_00320 | 10858  | 12798  | 1941  | 0.76  | 99.85 |
| scaffold01069 | 14922 | 22563 | 7642  | 16.56 | C_unshiu_00320 | 12341  | 20026  | 7686  | 3     | 98.22 |
| scaffold01069 | 29142 | 30778 | 1637  | 3.55  | C_unshiu_00320 | 19838  | 21482  | 1645  | 0.64  | 98.24 |
| scaffold01069 | 42660 | 46158 | 3499  | 7.58  | C_unshiu_00320 | 31125  | 34624  | 3500  | 1.36  | 98.47 |
| scaffold01070 | 3312  | 6367  | 3056  | 6.62  | C_unshiu_01452 | 2720   | 5775   | 3056  | 4.6   | 99.9  |
| scaffold01070 | 9301  | 11034 | 1734  | 3.76  | C_unshiu_01452 | 8961   | 10695  | 1735  | 2.61  | 99.88 |
| scaffold01070 | 11058 | 15215 | 4158  | 9.01  | C_unshiu_01452 | 10923  | 15056  | 4134  | 6.22  | 99.25 |
| scaffold01070 | 15554 | 23794 | 8241  | 17.86 | C_unshiu_01452 | 15873  | 24103  | 8231  | 12.39 | 99.71 |
| scaffold01070 | 36999 | 46154 | 9156  | 19.84 | C_unshiu_01452 | 37696  | 46851  | 9156  | 13.78 | 99.97 |
| scaffold01071 | 1     | 16720 | 16720 | 36.3  | C_unshiu_00358 | 22591  | 39308  | 16718 | 7.05  | 99.95 |
| scaffold01071 | 16855 | 18509 | 1655  | 3.59  | C_unshiu_00358 | 39466  | 41119  | 1654  | 0.7   | 99.94 |
| scaffold01071 | 26089 | 39644 | 13556 | 29.43 | C_unshiu_01390 | 1      | 13545  | 13545 | 19.08 | 99.78 |
| scaffold01072 | 476   | 1780  | 1305  | 2.84  | C_unshiu_01193 | 39858  | 41162  | 1305  | 1.51  | 100   |
| scaffold01072 | 1823  | 3514  | 1692  | 3.68  | C_unshiu_01193 | 41418  | 43109  | 1692  | 1.96  | 99.76 |
| scaffold01072 | 4141  | 6112  | 1972  | 4.29  | C_unshiu_01193 | 44225  | 46195  | 1971  | 2.28  | 99.95 |
| scaffold01072 | 6825  | 9090  | 2266  | 4.93  | C_unshiu_01193 | 47425  | 49690  | 2266  | 2.63  | 99.34 |
| scaffold01072 | 12372 | 16150 | 3779  | 8.22  | C_unshiu_01412 | 60954  | 64732  | 3779  | 5.4   | 100   |
| scaffold01072 | 19781 | 22327 | 2547  | 5.54  | C_unshiu_01412 | 67452  | 70002  | 2551  | 3.64  | 99.76 |
| scaffold01072 | 33269 | 34658 | 1390  | 3.02  | C_unshiu_00298 | 186352 | 187740 | 1389  | 0.52  | 99.64 |
| scaffold01072 | 38847 | 40199 | 1353  | 2.94  | C_unshiu_01725 | 8216   | 9561   | 1346  | 2.6   | 99.11 |
| scaffold01073 | 5     | 12894 | 12890 | 28.08 | C_unshiu_02009 | 15422  | 2580   | 12843 | 31.77 | 99.46 |
| scaffold01073 | 12970 | 15140 | 2171  | 4.73  | C_unshiu_02009 | 2171   | 1      | 2171  | 5.37  | 99.86 |
| scaffold01073 | 18108 | 20883 | 2776  | 6.05  | C_unshiu_02781 | 18251  | 15476  | 2776  | 15.21 | 100   |
| scaffold01073 | 23076 | 26521 | 3446  | 7.51  | C_unshiu_02781 | 15075  | 11630  | 3446  | 18.88 | 99.94 |
| scaffold01073 | 27623 | 36106 | 8484  | 18.48 | C_unshiu_02781 | 10109  | 1634   | 8476  | 46.44 | 99.86 |
| scaffold01073 | 36106 | 37396 | 1291  | 2.81  | C_unshiu_02009 | 18628  | 17335  | 1294  | 3.2   | 98.07 |
| scaffold01074 | 1     | 27602 | 27602 | 60.2  | C_unshiu_00527 | 145549 | 173139 | 27591 | 14.96 | 99.87 |
| scaffold01074 | 29644 | 37304 | 7661  | 16.71 | C_unshiu_00527 | 174902 | 182562 | 7661  | 4.15  | 100   |
| scaffold01075 | 11000 | 13669 | 2670  | 5.83  | C_unshiu_00146 | 6510   | 9192   | 2683  | 0.68  | 98.96 |
| scaffold01075 | 13857 | 15679 | 1823  | 3.98  | C_unshiu_00146 | 9761   | 11584  | 1824  | 0.46  | 99.84 |
| scaffold01075 | 15744 | 17703 | 1960  | 4.28  | C_unshiu_00146 | 12503  | 14462  | 1960  | 0.5   | 99.9  |
| scaffold01075 | 18301 | 19845 | 1545  | 3.37  | C_unshiu_00959 | 69700  | 68155  | 1546  | 1.4   | 99.94 |
| scaffold01075 | 19845 | 22854 | 3010  | 6.57  | C_unshiu_00146 | 17605  | 20614  | 3010  | 0.77  | 99.83 |
| scaffold01075 | 27663 | 28898 | 1236  | 2.7   | C_unshiu_00959 | 64376  | 63141  | 1236  | 1.12  | 99.84 |
| scaffold01075 | 38674 | 39880 | 1207  | 2.64  | C_unshiu_00959 | 106023 | 104817 | 1207  | 1.09  | 99.75 |
| scaffold01076 | 504   | 3357  | 2854  | 6.26  | C_unshiu_00036 | 49787  | 52640  | 2854  | 0.42  | 100   |
| scaffold01076 | 11046 | 12236 | 1191  | 2.61  | C_unshiu_01197 | 51872  | 53063  | 1192  | 1.38  | 98.74 |
| scaffold01076 | 22264 | 27142 | 4879  | 10.71 | C_unshiu_01474 | 60064  | 64887  | 4824  | 7.43  | 98.06 |
| scaffold01077 | 1     | 3088  | 3088  | 6.78  | C_unshiu_02576 | 9230   | 12317  | 3088  | 13.65 | 99.77 |
| scaffold01077 | 4293  | 5857  | 1565  | 3.43  | C_unshiu_02576 | 14203  | 15770  | 1568  | 6.93  | 98.98 |

|               |       |       |       |       |                |        |        |       |       |       |
|---------------|-------|-------|-------|-------|----------------|--------|--------|-------|-------|-------|
| scaffold01077 | 4293  | 5857  | 1565  | 3.43  | C_unshiu_02576 | 20177  | 18608  | 1570  | 6.94  | 98.79 |
| scaffold01077 | 7469  | 20216 | 12748 | 27.97 | C_unshiu_01463 | 43486  | 56260  | 12775 | 19.43 | 98.86 |
| scaffold01077 | 23310 | 26987 | 3678  | 8.07  | C_unshiu_00916 | 78209  | 81886  | 3678  | 3.19  | 100   |
| scaffold01077 | 30717 | 31884 | 1168  | 2.56  | C_unshiu_00636 | 63519  | 64686  | 1168  | 0.73  | 99.91 |
| scaffold01077 | 32272 | 34615 | 2344  | 5.14  | C_unshiu_01223 | 32634  | 30316  | 2319  | 2.78  | 98.25 |
| scaffold01077 | 33775 | 35403 | 1629  | 3.57  | C_unshiu_01223 | 61990  | 63620  | 1631  | 1.96  | 99.45 |
| scaffold01077 | 34967 | 38580 | 3614  | 7.93  | C_unshiu_01223 | 29266  | 25667  | 3600  | 4.32  | 98.4  |
| scaffold01078 | 9321  | 16274 | 6954  | 15.28 | C_unshiu_00128 | 157757 | 150827 | 6931  | 1.68  | 99.17 |
| scaffold01078 | 19802 | 25491 | 5690  | 12.5  | C_unshiu_00128 | 151704 | 146013 | 5692  | 1.38  | 99.46 |
| scaffold01078 | 26947 | 28539 | 1593  | 3.5   | C_unshiu_00128 | 144238 | 142646 | 1593  | 0.39  | 100   |
| scaffold01078 | 32773 | 34992 | 2220  | 4.88  | C_unshiu_01407 | 13273  | 15458  | 2186  | 3.12  | 98.02 |
| scaffold01079 | 1     | 13187 | 13187 | 29    | C_unshiu_00915 | 100161 | 87099  | 13063 | 11.32 | 98.82 |
| scaffold01080 | 5472  | 19531 | 14060 | 30.93 | C_unshiu_00264 | 169844 | 155778 | 14067 | 4.94  | 99.86 |
| scaffold01080 | 21606 | 27970 | 6365  | 14    | C_unshiu_00264 | 154576 | 148212 | 6365  | 2.24  | 99.89 |
| scaffold01080 | 32761 | 35457 | 2697  | 5.93  | C_unshiu_01299 | 38835  | 36138  | 2698  | 3.48  | 99.63 |
| scaffold01080 | 43313 | 44464 | 1152  | 2.53  | C_unshiu_01299 | 27045  | 25893  | 1153  | 1.49  | 99.91 |
| scaffold01081 | 2     | 14040 | 14039 | 30.89 | C_unshiu_00754 | 74639  | 60557  | 14083 | 10.39 | 99.44 |
| scaffold01081 | 14003 | 19890 | 5888  | 12.95 | C_unshiu_00754 | 60557  | 54668  | 5890  | 4.34  | 99.93 |
| scaffold01081 | 22957 | 25048 | 2092  | 4.6   | C_unshiu_01034 | 60005  | 62090  | 2086  | 2.03  | 99.67 |
| scaffold01081 | 25071 | 40127 | 15057 | 33.13 | C_unshiu_01034 | 64265  | 79277  | 15013 | 14.61 | 98.79 |
| scaffold01082 | 4801  | 6979  | 2179  | 4.8   | C_unshiu_03069 | 2180   | 1      | 2180  | 20.45 | 99.91 |
| scaffold01082 | 10753 | 12471 | 1719  | 3.79  | C_unshiu_00329 | 91028  | 92746  | 1719  | 0.68  | 100   |
| scaffold01082 | 12464 | 13799 | 1336  | 2.95  | C_unshiu_00054 | 507239 | 505903 | 1337  | 0.22  | 98.66 |
| scaffold01082 | 14711 | 15865 | 1155  | 2.55  | C_unshiu_02050 | 26551  | 25397  | 1155  | 2.99  | 100   |
| scaffold01082 | 17338 | 18554 | 1217  | 2.68  | C_unshiu_02050 | 22933  | 21717  | 1217  | 3.15  | 99.67 |
| scaffold01082 | 19849 | 23262 | 3414  | 7.53  | C_unshiu_02050 | 20351  | 16935  | 3417  | 8.84  | 99.88 |
| scaffold01082 | 36044 | 41488 | 5445  | 12.01 | C_unshiu_00054 | 496963 | 491513 | 5451  | 0.92  | 98.53 |
| scaffold01082 | 41873 | 43896 | 2024  | 4.46  | C_unshiu_00054 | 490685 | 488656 | 2030  | 0.34  | 99.7  |
| scaffold01082 | 43407 | 45354 | 1948  | 4.3   | C_unshiu_03069 | 9078   | 7131   | 1948  | 18.27 | 100   |
| scaffold01083 | 16939 | 20158 | 3220  | 7.12  | C_unshiu_01902 | 17322  | 20541  | 3220  | 7.21  | 99.91 |
| scaffold01083 | 25492 | 27117 | 1626  | 3.6   | C_unshiu_01902 | 24116  | 25742  | 1627  | 3.64  | 99.69 |
| scaffold01083 | 32555 | 34890 | 2336  | 5.17  | C_unshiu_01902 | 31125  | 33460  | 2336  | 5.23  | 100   |
| scaffold01083 | 34891 | 36384 | 1494  | 3.3   | C_unshiu_01071 | 17889  | 16396  | 1494  | 1.51  | 100   |
| scaffold01083 | 38797 | 42047 | 3251  | 7.19  | C_unshiu_01902 | 36235  | 39485  | 3251  | 7.28  | 99.85 |
| scaffold01083 | 44196 | 45225 | 1030  | 2.28  | C_unshiu_00108 | 4699   | 5728   | 1030  | 0.23  | 99.81 |
| scaffold01084 | 13362 | 14994 | 1633  | 3.62  | C_unshiu_03036 | 1      | 1632   | 1632  | 13.69 | 99.82 |
| scaffold01084 | 15340 | 22855 | 7516  | 16.64 | C_unshiu_03036 | 2370   | 9878   | 7509  | 62.99 | 99.71 |
| scaffold01084 | 20910 | 22962 | 2053  | 4.55  | C_unshiu_03036 | 11920  | 9870   | 2051  | 17.21 | 99.9  |
| scaffold01084 | 34756 | 45167 | 10412 | 23.05 | C_unshiu_00156 | 308285 | 297874 | 10412 | 2.75  | 99.95 |
| scaffold01085 | 619   | 4048  | 3430  | 7.64  | C_unshiu_00410 | 161770 | 158342 | 3429  | 1.55  | 98.69 |
| scaffold01085 | 4067  | 5875  | 1809  | 4.03  | C_unshiu_00410 | 157814 | 156006 | 1809  | 0.82  | 99.94 |
| scaffold01085 | 6986  | 8709  | 1724  | 3.84  | C_unshiu_00410 | 154794 | 153072 | 1723  | 0.78  | 99.54 |
| scaffold01085 | 9922  | 11545 | 1624  | 3.62  | C_unshiu_00410 | 152555 | 150922 | 1634  | 0.74  | 99.02 |
| scaffold01085 | 14431 | 17477 | 3047  | 6.79  | C_unshiu_01853 | 41535  | 38489  | 3047  | 6.57  | 99.31 |
| scaffold01085 | 19276 | 22292 | 3017  | 6.72  | C_unshiu_00625 | 90500  | 87500  | 3001  | 1.85  | 98.71 |
| scaffold01085 | 22728 | 41758 | 19031 | 42.39 | C_unshiu_00625 | 86153  | 67163  | 18991 | 11.73 | 99.76 |
| scaffold01085 | 42139 | 44899 | 2761  | 6.15  | C_unshiu_00625 | 60239  | 63001  | 2763  | 1.71  | 98.91 |
| scaffold01086 | 5700  | 34570 | 28871 | 64.5  | C_unshiu_01268 | 34966  | 63764  | 28799 | 36.19 | 99.25 |
| scaffold01086 | 34607 | 36920 | 2314  | 5.17  | C_unshiu_01268 | 64232  | 66547  | 2316  | 2.91  | 99.53 |
| scaffold01086 | 41252 | 43782 | 2531  | 5.65  | C_unshiu_01268 | 69982  | 72512  | 2531  | 3.18  | 100   |
| scaffold01087 | 4997  | 13094 | 8098  | 18.16 | C_unshiu_01099 | 88271  | 80187  | 8085  | 8.41  | 98.87 |
| scaffold01087 | 17067 | 18767 | 1701  | 3.82  | C_unshiu_01099 | 75619  | 73918  | 1702  | 1.77  | 99.82 |
| scaffold01087 | 18910 | 19996 | 1087  | 2.44  | C_unshiu_01099 | 73745  | 72655  | 1091  | 1.13  | 99.63 |
| scaffold01087 | 20457 | 22492 | 2036  | 4.57  | C_unshiu_01312 | 22466  | 24502  | 2037  | 2.68  | 99.75 |
| scaffold01087 | 22464 | 39316 | 16853 | 37.8  | C_unshiu_01099 | 69276  | 52413  | 16864 | 17.54 | 99.76 |
| scaffold01089 | 7961  | 13634 | 5674  | 12.72 | C_unshiu_00324 | 56177  | 61850  | 5674  | 2.23  | 100   |
| scaffold01091 | 1     | 1716  | 1716  | 3.89  | C_unshiu_02265 | 2467   | 752    | 1716  | 5.54  | 100   |
| scaffold01091 | 21638 | 28375 | 6738  | 15.26 | C_unshiu_02338 | 1      | 6736   | 6736  | 23.47 | 99.1  |
| scaffold01091 | 26078 | 41049 | 14972 | 33.9  | C_unshiu_00145 | 80812  | 65884  | 14929 | 3.77  | 99.02 |
| scaffold01092 | 7238  | 42420 | 35183 | 79.67 | C_unshiu_02147 | 1      | 35225  | 35225 | 100   | 99.32 |
| scaffold01093 | 12529 | 15029 | 2501  | 5.67  | C_unshiu_01124 | 33741  | 31241  | 2501  | 2.68  | 100   |
| scaffold01093 | 16289 | 18527 | 2239  | 5.07  | C_unshiu_01124 | 29404  | 27166  | 2239  | 2.4   | 100   |
| scaffold01093 | 29927 | 31388 | 1462  | 3.31  | C_unshiu_01124 | 15307  | 13844  | 1464  | 1.57  | 99.52 |
| scaffold01093 | 31469 | 42064 | 10596 | 24    | C_unshiu_01124 | 12737  | 2143   | 10595 | 11.34 | 99.25 |
| scaffold01093 | 42273 | 44086 | 1814  | 4.11  | C_unshiu_01124 | 1817   | 1      | 1817  | 1.94  | 99.61 |
| scaffold01094 | 4251  | 44035 | 39785 | 90.35 | C_unshiu_00036 | 404259 | 364560 | 39700 | 5.81  | 99.53 |
| scaffold01095 | 12949 | 15300 | 2352  | 5.35  | C_unshiu_00226 | 115493 | 113155 | 2339  | 0.75  | 99.32 |
| scaffold01095 | 42936 | 43963 | 1028  | 2.34  | C_unshiu_00837 | 40878  | 41905  | 1028  | 0.83  | 100   |
| scaffold01096 | 6362  | 14909 | 8548  | 19.5  | C_unshiu_01099 | 24165  | 15596  | 8570  | 8.91  | 98.16 |
| scaffold01096 | 16772 | 18998 | 2227  | 5.08  | C_unshiu_00803 | 123443 | 121219 | 2225  | 1.74  | 99.15 |
| scaffold01096 | 17616 | 18998 | 1383  | 3.16  | C_unshiu_01250 | 28622  | 27239  | 1384  | 1.71  | 98.77 |
| scaffold01096 | 19016 | 21079 | 2064  | 4.71  | C_unshiu_01099 | 11806  | 9742   | 2065  | 2.15  | 98.5  |
| scaffold01096 | 24322 | 26530 | 2209  | 5.04  | C_unshiu_02788 | 15739  | 17947  | 2209  | 12.2  | 98.65 |
| scaffold01096 | 27752 | 30528 | 2777  | 6.34  | C_unshiu_01099 | 3111   | 347    | 2765  | 2.88  | 98.6  |
| scaffold01096 | 30529 | 32862 | 2334  | 5.33  | C_unshiu_02788 | 12761  | 10427  | 2335  | 12.9  | 99.87 |
| scaffold01096 | 33759 | 36859 | 3101  | 7.08  | C_unshiu_02788 | 9400   | 6299   | 3102  | 17.14 | 99.9  |
| scaffold01096 | 39779 | 41391 | 1613  | 3.68  | C_unshiu_02788 | 4023   | 2406   | 1618  | 8.94  | 99.51 |
| scaffold01098 | 2600  | 4663  | 2064  | 4.73  | C_unshiu_01341 | 58801  | 60866  | 2066  | 2.77  | 98.26 |
| scaffold01098 | 6891  | 34646 | 27756 | 63.56 | C_unshiu_00298 | 224340 | 252095 | 27756 | 10.4  | 100   |

|               |       |       |       |       |                |        |        |       |       |       |
|---------------|-------|-------|-------|-------|----------------|--------|--------|-------|-------|-------|
| scaffold01098 | 35273 | 37417 | 2145  | 4.91  | C_unshiu_00298 | 252958 | 255102 | 2145  | 0.8   | 99.91 |
| scaffold01098 | 40843 | 43671 | 2829  | 6.48  | C_unshiu_01891 | 32463  | 29643  | 2821  | 6.27  | 98.98 |
| scaffold01099 | 6027  | 12516 | 6490  | 14.86 | C_unshiu_00074 | 391910 | 398403 | 6494  | 1.27  | 99.89 |
| scaffold01099 | 13119 | 14168 | 1050  | 2.4   | C_unshiu_00074 | 399704 | 400753 | 1050  | 0.2   | 100   |
| scaffold01099 | 23497 | 25314 | 1818  | 4.16  | C_unshiu_01432 | 61790  | 59970  | 1821  | 2.67  | 99.84 |
| scaffold01099 | 25171 | 37616 | 12446 | 28.5  | C_unshiu_01695 | 40232  | 52686  | 12455 | 23.64 | 99.53 |
| scaffold01100 | 632   | 3424  | 2793  | 6.42  | C_unshiu_02478 | 11279  | 14071  | 2793  | 11.02 | 100   |
| scaffold01101 | 5570  | 10526 | 4957  | 11.39 | C_unshiu_01341 | 54113  | 49159  | 4955  | 6.65  | 99.88 |
| scaffold01101 | 15096 | 18928 | 3833  | 8.81  | C_unshiu_01341 | 44467  | 40635  | 3833  | 5.15  | 99.5  |
| scaffold01101 | 28507 | 30167 | 1661  | 3.82  | C_unshiu_01341 | 27434  | 29082  | 1649  | 2.21  | 98.44 |
| scaffold01102 | 29    | 1923  | 1895  | 4.37  | C_unshiu_00056 | 9603   | 7712   | 1892  | 0.32  | 98.27 |
| scaffold01102 | 5201  | 13331 | 8131  | 18.77 | C_unshiu_01328 | 75255  | 67125  | 8131  | 10.8  | 98.93 |
| scaffold01102 | 16143 | 17586 | 1444  | 3.33  | C_unshiu_01328 | 64044  | 62600  | 1445  | 1.92  | 98.75 |
| scaffold01102 | 19421 | 20573 | 1153  | 2.66  | C_unshiu_01328 | 59885  | 58745  | 1141  | 1.52  | 98.61 |
| scaffold01102 | 21162 | 22312 | 1151  | 2.66  | C_unshiu_01328 | 58429  | 57279  | 1151  | 1.53  | 99.31 |
| scaffold01102 | 24536 | 33373 | 8838  | 20.4  | C_unshiu_01328 | 56370  | 47581  | 8790  | 11.68 | 98.36 |
| scaffold01102 | 34895 | 41671 | 6777  | 15.64 | C_unshiu_01328 | 23969  | 30713  | 6745  | 8.96  | 99.1  |
| scaffold01102 | 41781 | 43329 | 1549  | 3.57  | C_unshiu_01328 | 38408  | 36859  | 1550  | 2.06  | 99.23 |
| scaffold01103 | 5062  | 27792 | 22731 | 52.45 | C_unshiu_01122 | 28981  | 6250   | 22732 | 24.23 | 99.97 |
| scaffold01103 | 39629 | 43341 | 3713  | 8.57  | C_unshiu_00075 | 34034  | 37726  | 3693  | 0.73  | 98.52 |
| scaffold01104 | 4947  | 39793 | 34847 | 80.43 | C_unshiu_00600 | 11211  | 46064  | 34854 | 20.79 | 99.97 |
| scaffold01104 | 39990 | 43325 | 3336  | 7.7   | C_unshiu_00600 | 46277  | 49614  | 3338  | 1.99  | 99.94 |
| scaffold01105 | 9908  | 20271 | 10364 | 23.92 | C_unshiu_02654 | 1      | 10407  | 10407 | 49.92 | 99.49 |
| scaffold01105 | 20429 | 25483 | 5055  | 11.67 | C_unshiu_02654 | 11974  | 17031  | 5058  | 24.26 | 99.23 |
| scaffold01105 | 25482 | 26626 | 1145  | 2.64  | C_unshiu_01177 | 1237   | 2381   | 1145  | 1.31  | 99.48 |
| scaffold01105 | 26627 | 27757 | 1131  | 2.61  | C_unshiu_01177 | 1171   | 2301   | 1131  | 1.29  | 98.05 |
| scaffold01105 | 31363 | 33205 | 1843  | 4.25  | C_unshiu_00724 | 107611 | 105769 | 1843  | 1.32  | 100   |
| scaffold01105 | 33216 | 35457 | 2242  | 5.18  | C_unshiu_00724 | 102090 | 99842  | 2249  | 1.61  | 99.24 |
| scaffold01106 | 3683  | 32020 | 28338 | 65.56 | C_unshiu_00828 | 87256  | 115567 | 28312 | 22.63 | 99.14 |
| scaffold01106 | 33123 | 37188 | 4066  | 9.41  | C_unshiu_00828 | 117035 | 121104 | 4070  | 3.25  | 98.97 |
| scaffold01106 | 37213 | 39433 | 2221  | 5.14  | C_unshiu_00828 | 76270  | 78494  | 2225  | 1.78  | 99.73 |
| scaffold01107 | 1     | 4866  | 4866  | 11.27 | C_unshiu_02585 | 17194  | 22054  | 4861  | 21.63 | 99.86 |
| scaffold01107 | 18257 | 24998 | 6742  | 15.61 | C_unshiu_02585 | 1      | 6743   | 6743  | 30    | 99.87 |
| scaffold01107 | 25958 | 29254 | 3297  | 7.64  | C_unshiu_01553 | 23341  | 20045  | 3297  | 5.46  | 100   |
| scaffold01107 | 40035 | 42929 | 2895  | 6.7   | C_unshiu_02760 | 16578  | 13684  | 2895  | 15.32 | 99.83 |
| scaffold01108 | 1776  | 2785  | 1010  | 2.34  | C_unshiu_00016 | 59212  | 60220  | 1009  | 0.12  | 98.81 |
| scaffold01108 | 16048 | 21833 | 5786  | 13.4  | C_unshiu_01261 | 60474  | 54679  | 5796  | 7.24  | 98.54 |
| scaffold01108 | 25345 | 29087 | 3743  | 8.67  | C_unshiu_01328 | 22398  | 18656  | 3743  | 4.97  | 100   |
| scaffold01108 | 29111 | 30939 | 1829  | 4.24  | C_unshiu_01261 | 49801  | 47973  | 1829  | 2.28  | 100   |
| scaffold01109 | 2565  | 19841 | 17277 | 40.11 | C_unshiu_02818 | 17498  | 221    | 17278 | 98.74 | 99.44 |
| scaffold01109 | 20211 | 24619 | 4409  | 10.24 | C_unshiu_00408 | 32692  | 37100  | 4409  | 1.99  | 100   |
| scaffold01109 | 26524 | 43070 | 16547 | 38.42 | C_unshiu_00408 | 39335  | 55883  | 16549 | 7.47  | 99.98 |
| scaffold01110 | 1     | 1011  | 1011  | 2.35  | C_unshiu_00803 | 35868  | 34858  | 1011  | 0.79  | 99.7  |
| scaffold01110 | 1020  | 9678  | 8659  | 20.12 | C_unshiu_00308 | 130714 | 139348 | 8635  | 3.3   | 99.09 |
| scaffold01110 | 13559 | 33960 | 20402 | 47.41 | C_unshiu_00308 | 142375 | 162774 | 20400 | 7.79  | 99.49 |
| scaffold01110 | 35210 | 38808 | 3599  | 8.36  | C_unshiu_00308 | 162690 | 166311 | 3622  | 1.38  | 98.59 |
| scaffold01112 | 2214  | 3988  | 1775  | 4.13  | C_unshiu_00349 | 11312  | 13088  | 1777  | 0.73  | 98.93 |
| scaffold01112 | 5645  | 7566  | 1922  | 4.47  | C_unshiu_00460 | 100162 | 98242  | 1921  | 0.94  | 99.53 |
| scaffold01112 | 7561  | 9643  | 2083  | 4.85  | C_unshiu_01346 | 55770  | 53688  | 2083  | 2.8   | 100   |
| scaffold01112 | 9645  | 20975 | 11331 | 26.37 | C_unshiu_00349 | 17743  | 29079  | 11337 | 4.66  | 99.48 |
| scaffold01112 | 22026 | 23207 | 1182  | 2.75  | C_unshiu_00349 | 29707  | 30888  | 1182  | 0.49  | 99.83 |
| scaffold01112 | 24664 | 26006 | 1343  | 3.13  | C_unshiu_00349 | 32602  | 33944  | 1343  | 0.55  | 100   |
| scaffold01112 | 26024 | 27589 | 1566  | 3.64  | C_unshiu_00349 | 36516  | 38081  | 1566  | 0.64  | 99.87 |
| scaffold01113 | 21138 | 22474 | 1337  | 3.11  | C_unshiu_00916 | 70615  | 69279  | 1337  | 1.16  | 99.33 |
| scaffold01113 | 24461 | 26050 | 1590  | 3.7   | C_unshiu_00241 | 80581  | 82170  | 1590  | 0.53  | 100   |
| scaffold01113 | 26321 | 28062 | 1742  | 4.06  | C_unshiu_00916 | 66888  | 65146  | 1743  | 1.51  | 99.77 |
| scaffold01113 | 30878 | 36896 | 6019  | 14.01 | C_unshiu_00916 | 59370  | 53361  | 6010  | 5.22  | 98.52 |
| scaffold01114 | 3669  | 6217  | 2549  | 5.94  | C_unshiu_00245 | 118549 | 121096 | 2548  | 0.85  | 99.57 |
| scaffold01114 | 7805  | 11163 | 3359  | 7.82  | C_unshiu_00245 | 123991 | 127367 | 3377  | 1.13  | 99.47 |
| scaffold01114 | 12672 | 14742 | 2071  | 4.82  | C_unshiu_00245 | 129383 | 131428 | 2046  | 0.68  | 98.74 |
| scaffold01114 | 21345 | 22835 | 1491  | 3.47  | C_unshiu_01643 | 25605  | 27095  | 1491  | 2.69  | 100   |
| scaffold01114 | 26932 | 27999 | 1068  | 2.49  | C_unshiu_00884 | 50239  | 49172  | 1068  | 0.9   | 98.13 |
| scaffold01114 | 28092 | 32199 | 4108  | 9.57  | C_unshiu_01459 | 39626  | 43730  | 4105  | 6.22  | 99.61 |
| scaffold01114 | 32942 | 41482 | 8541  | 19.89 | C_unshiu_01459 | 8558   | 17098  | 8541  | 12.95 | 99.94 |
| scaffold01114 | 41498 | 42932 | 1435  | 3.34  | C_unshiu_01459 | 18424  | 19858  | 1435  | 2.18  | 100   |
| scaffold01115 | 1     | 1984  | 1984  | 4.63  | C_unshiu_02914 | 11442  | 13425  | 1984  | 12.82 | 99.14 |
| scaffold01115 | 7423  | 16665 | 9243  | 21.59 | C_unshiu_02642 | 17688  | 8489   | 9200  | 43.64 | 98.28 |
| scaffold01115 | 28718 | 32312 | 3595  | 8.4   | C_unshiu_01389 | 42078  | 38488  | 3591  | 5.05  | 99.17 |
| scaffold01116 | 9035  | 10699 | 1665  | 3.89  | C_unshiu_00384 | 124128 | 125794 | 1667  | 0.73  | 99.88 |
| scaffold01116 | 18270 | 23841 | 5572  | 13.03 | C_unshiu_00384 | 127283 | 132841 | 5559  | 2.45  | 98.14 |
| scaffold01116 | 19559 | 28997 | 9439  | 22.08 | C_unshiu_02513 | 24199  | 14729  | 9471  | 39.14 | 98.63 |
| scaffold01116 | 32884 | 34511 | 1628  | 3.81  | C_unshiu_00384 | 103059 | 104686 | 1628  | 0.72  | 99.94 |
| scaffold01116 | 36157 | 38006 | 1850  | 4.33  | C_unshiu_02513 | 8236   | 6386   | 1851  | 7.65  | 99.41 |
| scaffold01116 | 38778 | 40667 | 1890  | 4.42  | C_unshiu_02513 | 5690   | 3805   | 1886  | 7.79  | 99.63 |
| scaffold01117 | 2156  | 4376  | 2221  | 5.2   | C_unshiu_00844 | 69287  | 71508  | 2222  | 1.8   | 99.68 |
| scaffold01117 | 4371  | 8319  | 3949  | 9.25  | C_unshiu_00760 | 84192  | 80272  | 3921  | 2.91  | 98.99 |
| scaffold01117 | 15287 | 19924 | 4638  | 10.86 | C_unshiu_00633 | 152311 | 147676 | 4636  | 2.89  | 99.72 |
| scaffold01117 | 20168 | 39858 | 19691 | 46.13 | C_unshiu_00760 | 76061  | 56314  | 19748 | 14.64 | 99.13 |
| scaffold01117 | 40475 | 41476 | 1002  | 2.35  | C_unshiu_00760 | 55185  | 54184  | 1002  | 0.74  | 99.5  |

|               |       |       |       |       |                |        |        |       |       |       |
|---------------|-------|-------|-------|-------|----------------|--------|--------|-------|-------|-------|
| scaffold01118 | 3272  | 10050 | 6779  | 15.89 | C_unshiu_01841 | 38932  | 32184  | 6749  | 14.4  | 98.72 |
| scaffold01118 | 15485 | 20766 | 5282  | 12.38 | C_unshiu_01841 | 27916  | 22634  | 5283  | 11.27 | 99.64 |
| scaffold01118 | 37612 | 39314 | 1703  | 3.99  | C_unshiu_01841 | 7021   | 5326   | 1696  | 3.62  | 98.95 |
| scaffold01119 | 1     | 24292 | 24292 | 57.1  | C_unshiu_02055 | 2689   | 26853  | 24165 | 62.97 | 99.27 |
| scaffold01119 | 28807 | 31311 | 2505  | 5.89  | C_unshiu_02055 | 30578  | 33059  | 2482  | 6.47  | 98.61 |
| scaffold01120 | 7606  | 10230 | 2625  | 6.17  | C_unshiu_01197 | 12122  | 9491   | 2632  | 3.06  | 99.54 |
| scaffold01120 | 13611 | 16566 | 2956  | 6.95  | C_unshiu_01197 | 15111  | 12133  | 2979  | 3.46  | 98.69 |
| scaffold01120 | 40231 | 41284 | 1054  | 2.48  | C_unshiu_02812 | 11024  | 12077  | 1054  | 5.98  | 99.81 |
| scaffold01121 | 13172 | 14416 | 1245  | 2.93  | C_unshiu_00593 | 92817  | 91573  | 1245  | 0.74  | 100   |
| scaffold01121 | 24539 | 30713 | 6175  | 14.52 | C_unshiu_01803 | 33624  | 27448  | 6177  | 12.77 | 99.97 |
| scaffold01121 | 33191 | 34221 | 1031  | 2.42  | C_unshiu_01803 | 24013  | 22972  | 1042  | 2.15  | 98.66 |
| scaffold01121 | 41372 | 42521 | 1150  | 2.7   | C_unshiu_01803 | 18418  | 17270  | 1149  | 2.38  | 98.44 |
| scaffold01122 | 31667 | 33500 | 1834  | 4.32  | C_unshiu_00571 | 128565 | 130411 | 1847  | 1.07  | 98.21 |
| scaffold01122 | 34278 | 35352 | 1075  | 2.53  | C_unshiu_00571 | 132158 | 133234 | 1077  | 0.62  | 98.98 |
| scaffold01122 | 38061 | 42444 | 4384  | 10.33 | C_unshiu_00571 | 136418 | 140819 | 4402  | 2.55  | 99.02 |
| scaffold01123 | 7732  | 11460 | 3729  | 8.81  | C_unshiu_00823 | 26318  | 22582  | 3737  | 2.96  | 99.38 |
| scaffold01123 | 13395 | 15481 | 2087  | 4.93  | C_unshiu_00823 | 19961  | 17884  | 2078  | 1.65  | 99.57 |
| scaffold01123 | 17725 | 19469 | 1745  | 4.12  | C_unshiu_00823 | 15164  | 13420  | 1745  | 1.38  | 100   |
| scaffold01123 | 19745 | 23635 | 3891  | 9.19  | C_unshiu_00823 | 12757  | 8842   | 3916  | 3.1   | 98.47 |
| scaffold01123 | 24997 | 26916 | 1920  | 4.54  | C_unshiu_00823 | 8757   | 6832   | 1926  | 1.53  | 98.13 |
| scaffold01123 | 27131 | 33334 | 6204  | 14.66 | C_unshiu_00823 | 6200   | 1      | 6200  | 4.91  | 98.83 |
| scaffold01125 | 8908  | 10038 | 1131  | 2.68  | C_unshiu_02026 | 2512   | 1380   | 1133  | 2.86  | 98.24 |
| scaffold01126 | 396   | 5706  | 5311  | 12.62 | C_unshiu_00219 | 30314  | 35627  | 5314  | 1.68  | 99.12 |
| scaffold01126 | 6498  | 14697 | 8200  | 19.49 | C_unshiu_00219 | 36711  | 44910  | 8200  | 2.59  | 100   |
| scaffold01126 | 16780 | 19883 | 3104  | 7.38  | C_unshiu_00219 | 47601  | 50703  | 3103  | 0.98  | 99.97 |
| scaffold01126 | 22308 | 23939 | 1632  | 3.88  | C_unshiu_00219 | 53892  | 55523  | 1632  | 0.52  | 100   |
| scaffold01126 | 25101 | 42082 | 16982 | 40.35 | C_unshiu_00219 | 56976  | 73975  | 17000 | 5.37  | 99.87 |
| scaffold01127 | 1     | 17334 | 17334 | 41.19 | C_unshiu_00382 | 85864  | 68480  | 17385 | 7.6   | 99.45 |
| scaffold01127 | 18489 | 27854 | 9366  | 22.26 | C_unshiu_00382 | 65909  | 56553  | 9357  | 4.09  | 99.01 |
| scaffold01127 | 25430 | 35102 | 9673  | 22.99 | C_unshiu_03092 | 1      | 9672   | 9672  | 100   | 99.67 |
| scaffold01127 | 35259 | 38760 | 3502  | 8.32  | C_unshiu_03054 | 1      | 3502   | 3502  | 31.05 | 99.94 |
| scaffold01127 | 39150 | 41468 | 2319  | 5.51  | C_unshiu_03054 | 4323   | 6641   | 2319  | 20.56 | 100   |
| scaffold01128 | 1     | 16444 | 16444 | 39.09 | C_unshiu_00466 | 1022   | 17391  | 16370 | 8.07  | 98.6  |
| scaffold01128 | 36793 | 42070 | 5278  | 12.55 | C_unshiu_00395 | 156116 | 150839 | 5278  | 2.36  | 99.73 |
| scaffold01129 | 1     | 2516  | 2516  | 5.99  | C_unshiu_02743 | 416    | 2928   | 2513  | 13.14 | 98.73 |
| scaffold01129 | 6040  | 7283  | 1244  | 2.96  | C_unshiu_00995 | 63695  | 64938  | 1244  | 1.17  | 100   |
| scaffold01129 | 7284  | 17323 | 10040 | 23.91 | C_unshiu_02743 | 7192   | 17239  | 10048 | 52.54 | 99.36 |
| scaffold01129 | 16410 | 26916 | 10507 | 25.02 | C_unshiu_00741 | 1349   | 11840  | 10492 | 7.64  | 99.24 |
| scaffold01130 | 13717 | 14746 | 1030  | 2.46  | C_unshiu_00375 | 225052 | 224023 | 1030  | 0.44  | 100   |
| scaffold01130 | 16206 | 22733 | 6528  | 15.57 | C_unshiu_03030 | 2381   | 8929   | 6549  | 54.14 | 99.33 |
| scaffold01130 | 30178 | 31924 | 1747  | 4.17  | C_unshiu_00204 | 325284 | 323523 | 1762  | 0.53  | 98.53 |
| scaffold01131 | 1     | 2678  | 2678  | 6.4   | C_unshiu_00040 | 618758 | 621436 | 2679  | 0.41  | 99.63 |
| scaffold01131 | 35532 | 38148 | 2617  | 6.25  | C_unshiu_02282 | 16312  | 18942  | 2631  | 8.69  | 98.25 |
| scaffold01132 | 4916  | 8347  | 3432  | 8.22  | C_unshiu_00709 | 80755  | 84184  | 3430  | 2.4   | 99.71 |
| scaffold01132 | 11188 | 12362 | 1175  | 2.81  | C_unshiu_00709 | 85408  | 86582  | 1175  | 0.82  | 100   |
| scaffold01132 | 18071 | 26303 | 8233  | 19.72 | C_unshiu_00709 | 92125  | 100317 | 8193  | 5.74  | 98.06 |
| scaffold01132 | 29189 | 37716 | 8528  | 20.42 | C_unshiu_00709 | 107853 | 116375 | 8523  | 5.97  | 99.92 |
| scaffold01133 | 3761  | 13239 | 9479  | 22.73 | C_unshiu_01617 | 46450  | 36971  | 9480  | 16.72 | 99.88 |
| scaffold01133 | 14188 | 23006 | 8819  | 21.15 | C_unshiu_00840 | 88901  | 97720  | 8820  | 7.13  | 99.84 |
| scaffold01134 | 963   | 4808  | 3846  | 9.24  | C_unshiu_01687 | 4969   | 1145   | 3825  | 7.19  | 98.63 |
| scaffold01134 | 11575 | 12778 | 1204  | 2.89  | C_unshiu_00474 | 80442  | 79240  | 1203  | 0.6   | 99.92 |
| scaffold01134 | 13238 | 14476 | 1239  | 2.98  | C_unshiu_00474 | 78164  | 76925  | 1240  | 0.62  | 99.35 |
| scaffold01134 | 14915 | 24595 | 9681  | 23.26 | C_unshiu_00474 | 76364  | 66664  | 9701  | 4.83  | 99.08 |
| scaffold01134 | 24631 | 29304 | 4674  | 11.23 | C_unshiu_00474 | 66365  | 61699  | 4667  | 2.32  | 99.47 |
| scaffold01135 | 1     | 2518  | 2518  | 6.06  | C_unshiu_01564 | 46767  | 49284  | 2518  | 4.23  | 99.96 |
| scaffold01135 | 3116  | 12198 | 9083  | 21.86 | C_unshiu_01564 | 50482  | 59538  | 9057  | 15.21 | 99.46 |
| scaffold01135 | 9451  | 36013 | 26563 | 63.92 | C_unshiu_01885 | 45169  | 18609  | 26561 | 58.8  | 99.98 |
| scaffold01135 | 36007 | 37593 | 1587  | 3.82  | C_unshiu_00357 | 118381 | 119967 | 1587  | 0.67  | 100   |
| scaffold01136 | 1     | 2629  | 2629  | 6.33  | C_unshiu_00170 | 276362 | 278991 | 2630  | 0.72  | 99.43 |
| scaffold01136 | 4368  | 6450  | 2083  | 5.02  | C_unshiu_00777 | 58096  | 60178  | 2083  | 1.58  | 99.95 |
| scaffold01136 | 9502  | 12863 | 3362  | 8.1   | C_unshiu_02274 | 26520  | 23160  | 3361  | 10.97 | 99.49 |
| scaffold01136 | 34038 | 36280 | 2243  | 5.4   | C_unshiu_01155 | 69400  | 71647  | 2248  | 2.5   | 98.19 |
| scaffold01137 | 1     | 1049  | 1049  | 2.56  | C_unshiu_00468 | 13065  | 12017  | 1049  | 0.52  | 100   |
| scaffold01137 | 1217  | 12592 | 11376 | 27.74 | C_unshiu_00468 | 11721  | 367    | 11355 | 5.64  | 99.5  |
| scaffold01137 | 11954 | 13408 | 1455  | 3.55  | C_unshiu_00077 | 390296 | 391738 | 1443  | 0.29  | 98.08 |
| scaffold01137 | 18847 | 21455 | 2609  | 6.36  | C_unshiu_00097 | 55185  | 57783  | 2599  | 0.56  | 99.54 |
| scaffold01137 | 24183 | 37614 | 13432 | 32.75 | C_unshiu_01250 | 49086  | 35650  | 13437 | 16.6  | 99.72 |
| scaffold01138 | 1145  | 21303 | 20159 | 49.32 | C_unshiu_00292 | 70793  | 90873  | 20081 | 7.44  | 99.12 |
| scaffold01138 | 23805 | 26726 | 2922  | 7.15  | C_unshiu_00292 | 94172  | 97092  | 2921  | 1.08  | 99.83 |
| scaffold01138 | 32276 | 36400 | 4125  | 10.09 | C_unshiu_00292 | 102311 | 106435 | 4125  | 1.53  | 98.93 |
| scaffold01138 | 37256 | 38857 | 1602  | 3.92  | C_unshiu_00067 | 514805 | 516409 | 1605  | 0.3   | 98.38 |
| scaffold01138 | 39861 | 40871 | 1011  | 2.47  | C_unshiu_00067 | 523313 | 524322 | 1010  | 0.19  | 99.01 |
| scaffold01139 | 3610  | 11805 | 8196  | 20.07 | C_unshiu_02389 | 2192   | 10359  | 8168  | 29.73 | 99.41 |
| scaffold01139 | 11830 | 24294 | 12465 | 30.52 | C_unshiu_02389 | 11965  | 24280  | 12316 | 44.82 | 98.27 |
| scaffold01139 | 31728 | 33000 | 1273  | 3.12  | C_unshiu_03116 | 2020   | 748    | 1273  | 14.76 | 100   |
| scaffold01139 | 34084 | 36101 | 2018  | 4.94  | C_unshiu_01437 | 65054  | 63037  | 2018  | 2.97  | 99.9  |
| scaffold01139 | 36127 | 39232 | 3106  | 7.6   | C_unshiu_01437 | 63143  | 60038  | 3106  | 4.58  | 99.74 |
| scaffold01140 | 911   | 21498 | 20588 | 50.86 | C_unshiu_00634 | 158918 | 138358 | 20561 | 12.85 | 99.74 |
| scaffold01140 | 21496 | 40418 | 18923 | 46.74 | C_unshiu_00634 | 138487 | 119565 | 18923 | 11.82 | 99.97 |

|               |       |       |       |       |                |        |        |       |       |       |
|---------------|-------|-------|-------|-------|----------------|--------|--------|-------|-------|-------|
| scaffold01141 | 3873  | 19177 | 15305 | 37.87 | C_unshiu_00316 | 17445  | 32702  | 15258 | 5.91  | 98.51 |
| scaffold01141 | 29836 | 37651 | 7816  | 19.34 | C_unshiu_00316 | 42660  | 50526  | 7867  | 3.05  | 98.18 |
| scaffold01142 | 2413  | 4789  | 2377  | 5.9   | C_unshiu_00607 | 16384  | 18757  | 2374  | 1.44  | 99.37 |
| scaffold01142 | 7201  | 10602 | 3402  | 8.45  | C_unshiu_00607 | 27649  | 24247  | 3403  | 2.06  | 99.97 |
| scaffold01142 | 14319 | 33411 | 19093 | 47.4  | C_unshiu_02108 | 25468  | 6397   | 19072 | 52.6  | 99.8  |
| scaffold01142 | 34687 | 37678 | 2992  | 7.43  | C_unshiu_02835 | 6861   | 9851   | 2991  | 17.54 | 99.93 |
| scaffold01143 | 1     | 2701  | 2701  | 6.71  | C_unshiu_00405 | 132997 | 135697 | 2701  | 1.22  | 100   |
| scaffold01143 | 4524  | 5731  | 1208  | 3     | C_unshiu_00256 | 136743 | 137950 | 1208  | 0.42  | 98.43 |
| scaffold01143 | 5332  | 40232 | 34901 | 86.75 | C_unshiu_00405 | 137600 | 172500 | 34901 | 15.72 | 99.97 |
| scaffold01144 | 6930  | 8033  | 1104  | 2.75  | C_unshiu_00054 | 410347 | 411448 | 1102  | 0.19  | 99.64 |
| scaffold01144 | 9649  | 15843 | 6195  | 15.41 | C_unshiu_00054 | 413437 | 419630 | 6194  | 1.04  | 98.2  |
| scaffold01144 | 10969 | 15843 | 4875  | 12.13 | C_unshiu_00439 | 173317 | 168432 | 4886  | 2.31  | 98.61 |
| scaffold01144 | 18892 | 20411 | 1520  | 3.78  | C_unshiu_02782 | 5063   | 3544   | 1520  | 8.33  | 99.93 |
| scaffold01145 | 6713  | 10425 | 3713  | 9.24  | C_unshiu_00442 | 6646   | 2930   | 3717  | 1.77  | 99.35 |
| scaffold01145 | 10414 | 13147 | 2734  | 6.8   | C_unshiu_01405 | 40322  | 37589  | 2734  | 3.9   | 99.96 |
| scaffold01145 | 13148 | 14551 | 1404  | 3.49  | C_unshiu_00442 | 1905   | 502    | 1404  | 0.67  | 100   |
| scaffold01146 | 1     | 2570  | 2570  | 6.4   | C_unshiu_00030 | 322898 | 320326 | 2573  | 0.36  | 99.88 |
| scaffold01146 | 2573  | 4486  | 1914  | 4.77  | C_unshiu_00030 | 320141 | 318228 | 1914  | 0.27  | 100   |
| scaffold01146 | 12498 | 14117 | 1620  | 4.03  | C_unshiu_00209 | 250167 | 251786 | 1620  | 0.49  | 100   |
| scaffold01146 | 34648 | 40149 | 5502  | 13.7  | C_unshiu_02357 | 6074   | 545    | 5530  | 19.59 | 98.97 |
| scaffold01147 | 10911 | 17176 | 6266  | 15.62 | C_unshiu_00381 | 1      | 6266   | 6266  | 2.74  | 99.87 |
| scaffold01147 | 19139 | 21716 | 2578  | 6.43  | C_unshiu_00381 | 8946   | 11522  | 2577  | 1.13  | 99.96 |
| scaffold01147 | 25583 | 39301 | 13719 | 34.2  | C_unshiu_00381 | 14956  | 28553  | 13598 | 5.94  | 98.8  |
| scaffold01148 | 1     | 3160  | 3160  | 7.89  | C_unshiu_00826 | 98062  | 101221 | 3160  | 2.52  | 100   |
| scaffold01148 | 3353  | 13647 | 10295 | 25.69 | C_unshiu_00826 | 101727 | 112022 | 10296 | 8.2   | 99.78 |
| scaffold01148 | 24004 | 25710 | 1707  | 4.26  | C_unshiu_00151 | 164145 | 165856 | 1712  | 0.44  | 98.89 |
| scaffold01148 | 25719 | 39934 | 14216 | 35.47 | C_unshiu_00151 | 166083 | 180298 | 14216 | 3.69  | 99.94 |
| scaffold01149 | 1081  | 11413 | 10333 | 25.8  | C_unshiu_02088 | 35353  | 25022  | 10332 | 27.9  | 99.98 |
| scaffold01149 | 11425 | 36192 | 24768 | 61.85 | C_unshiu_02088 | 24768  | 1      | 24768 | 66.87 | 100   |
| scaffold01150 | 8688  | 11458 | 2771  | 6.93  | C_unshiu_00685 | 138609 | 135799 | 2811  | 1.9   | 98.47 |
| scaffold01150 | 13120 | 14280 | 1161  | 2.9   | C_unshiu_00685 | 134381 | 133217 | 1165  | 0.79  | 99.57 |
| scaffold01150 | 18158 | 35314 | 17157 | 42.93 | C_unshiu_00685 | 128887 | 111731 | 17157 | 11.62 | 100   |
| scaffold01150 | 35881 | 38167 | 2287  | 5.72  | C_unshiu_00685 | 110757 | 108471 | 2287  | 1.55  | 100   |
| scaffold01150 | 38289 | 39969 | 1681  | 4.21  | C_unshiu_00685 | 108175 | 106495 | 1681  | 1.14  | 99.7  |
| scaffold01151 | 1     | 8601  | 8601  | 21.58 | C_unshiu_00688 | 27921  | 19339  | 8583  | 5.85  | 98.32 |
| scaffold01151 | 16261 | 21713 | 5453  | 13.68 | C_unshiu_00080 | 156030 | 161495 | 5466  | 1.11  | 98.17 |
| scaffold01151 | 22501 | 24566 | 2066  | 5.18  | C_unshiu_00688 | 10585  | 8520   | 2066  | 1.41  | 98.79 |
| scaffold01151 | 25220 | 29403 | 4184  | 10.5  | C_unshiu_00688 | 7463   | 3272   | 4192  | 2.86  | 99.64 |
| scaffold01151 | 29532 | 32212 | 2681  | 6.73  | C_unshiu_00688 | 2682   | 1      | 2682  | 1.83  | 99.63 |
| scaffold01152 | 36829 | 39758 | 2930  | 7.37  | C_unshiu_00331 | 215980 | 218911 | 2932  | 1.16  | 99.8  |
| scaffold01153 | 1     | 3183  | 3183  | 8.03  | C_unshiu_00790 | 45812  | 42628  | 3185  | 2.45  | 98.59 |
| scaffold01153 | 3553  | 5730  | 2178  | 5.5   | C_unshiu_00790 | 41871  | 39696  | 2176  | 1.68  | 99.86 |
| scaffold01153 | 5787  | 8410  | 2624  | 6.62  | C_unshiu_00790 | 39517  | 36897  | 2621  | 2.02  | 98.48 |
| scaffold01153 | 20413 | 39615 | 19203 | 48.47 | C_unshiu_02512 | 21382  | 2172   | 19211 | 79.38 | 99.13 |
| scaffold01154 | 9403  | 11395 | 1993  | 5.07  | C_unshiu_00555 | 109615 | 111607 | 1993  | 1.13  | 100   |
| scaffold01154 | 37661 | 39119 | 1459  | 3.71  | C_unshiu_00200 | 268496 | 267039 | 1458  | 0.43  | 98.22 |
| scaffold01154 | 37662 | 39308 | 1647  | 4.19  | C_unshiu_00241 | 206108 | 207757 | 1650  | 0.55  | 98.13 |
| scaffold01155 | 1     | 1069  | 1069  | 2.73  | C_unshiu_02155 | 7875   | 6807   | 1069  | 3.08  | 98.69 |
| scaffold01155 | 14420 | 17298 | 2879  | 7.35  | C_unshiu_00426 | 101691 | 98813  | 2879  | 1.33  | 100   |
| scaffold01155 | 17616 | 39155 | 21540 | 55.01 | C_unshiu_00426 | 98482  | 76984  | 21499 | 9.9   | 99.72 |
| scaffold01156 | 4339  | 23852 | 19514 | 49.94 | C_unshiu_01922 | 19544  | 5      | 19540 | 44.48 | 99.77 |
| scaffold01156 | 36917 | 38416 | 1500  | 3.84  | C_unshiu_00197 | 101877 | 103376 | 1500  | 0.44  | 100   |
| scaffold01157 | 2793  | 4260  | 1468  | 3.78  | C_unshiu_01591 | 54331  | 52864  | 1468  | 2.52  | 98.77 |
| scaffold01157 | 9704  | 24990 | 15287 | 39.32 | C_unshiu_00080 | 335675 | 350962 | 15288 | 3.1   | 99.66 |
| scaffold01157 | 33683 | 38882 | 5200  | 13.37 | C_unshiu_00080 | 368008 | 373207 | 5200  | 1.06  | 100   |
| scaffold01158 | 1     | 1569  | 1569  | 4.05  | C_unshiu_02024 | 22138  | 20562  | 1577  | 3.97  | 98.54 |
| scaffold01158 | 4649  | 5818  | 1170  | 3.02  | C_unshiu_02024 | 17602  | 16429  | 1174  | 2.96  | 99.66 |
| scaffold01159 | 1     | 2931  | 2931  | 7.56  | C_unshiu_01486 | 45153  | 42229  | 2925  | 4.57  | 99.62 |
| scaffold01159 | 7427  | 16607 | 9181  | 23.69 | C_unshiu_01486 | 38973  | 29830  | 9144  | 14.29 | 99.51 |
| scaffold01159 | 36945 | 38749 | 1805  | 4.66  | C_unshiu_01486 | 21823  | 20019  | 1805  | 2.82  | 99.94 |
| scaffold01160 | 12089 | 32047 | 19959 | 51.52 | C_unshiu_01018 | 74142  | 54239  | 19904 | 19.11 | 99.45 |
| scaffold01161 | 7421  | 23661 | 16241 | 41.98 | C_unshiu_00463 | 187378 | 203618 | 16241 | 7.98  | 99.95 |
| scaffold01161 | 31940 | 34164 | 2225  | 5.75  | C_unshiu_01280 | 2213   | 1      | 2213  | 2.81  | 98.21 |
| scaffold01162 | 14067 | 15988 | 1922  | 4.99  | C_unshiu_01156 | 32510  | 30588  | 1923  | 2.14  | 99.53 |
| scaffold01162 | 15985 | 17033 | 1049  | 2.72  | C_unshiu_01156 | 27779  | 28828  | 1050  | 1.17  | 99.05 |
| scaffold01162 | 17985 | 20953 | 2969  | 7.7   | C_unshiu_01156 | 27786  | 24807  | 2980  | 3.31  | 98.96 |
| scaffold01162 | 22248 | 25926 | 3679  | 9.54  | C_unshiu_01156 | 24809  | 21129  | 3681  | 4.09  | 99.92 |
| scaffold01162 | 26198 | 29156 | 2959  | 7.68  | C_unshiu_01493 | 48713  | 45728  | 2986  | 4.69  | 98.36 |
| scaffold01162 | 32505 | 35591 | 3087  | 8.01  | C_unshiu_01156 | 18189  | 15103  | 3087  | 3.43  | 100   |
| scaffold01164 | 23180 | 36198 | 13019 | 33.83 | C_unshiu_02602 | 9060   | 22034  | 12975 | 58.89 | 99.6  |
| scaffold01165 | 5604  | 13106 | 7503  | 19.5  | C_unshiu_01964 | 42066  | 34564  | 7503  | 17.84 | 100   |
| scaffold01165 | 13165 | 37594 | 24430 | 63.5  | C_unshiu_01964 | 34334  | 9927   | 24408 | 58.02 | 99.66 |
| scaffold01166 | 1     | 8882  | 8882  | 23.14 | C_unshiu_01043 | 11877  | 3010   | 8868  | 8.75  | 99.21 |
| scaffold01166 | 24758 | 25775 | 1018  | 2.65  | C_unshiu_00074 | 117525 | 116508 | 1018  | 0.2   | 100   |
| scaffold01166 | 31553 | 33141 | 1589  | 4.14  | C_unshiu_03090 | 9366   | 7777   | 1590  | 16.38 | 99.06 |
| scaffold01166 | 34931 | 36566 | 1636  | 4.26  | C_unshiu_03090 | 5865   | 4230   | 1636  | 16.85 | 100   |
| scaffold01167 | 6415  | 7511  | 1097  | 2.86  | C_unshiu_01068 | 508    | 1598   | 1091  | 1.1   | 98.27 |
| scaffold01167 | 24062 | 28464 | 4403  | 11.48 | C_unshiu_00307 | 12391  | 16791  | 4401  | 1.68  | 99.41 |
| scaffold01167 | 30483 | 31561 | 1079  | 2.81  | C_unshiu_00307 | 18799  | 19877  | 1079  | 0.41  | 99.81 |

|               |       |       |       |       |                |        |        |       |       |       |
|---------------|-------|-------|-------|-------|----------------|--------|--------|-------|-------|-------|
| scaffold01167 | 34550 | 37735 | 3186  | 8.31  | C_unshiu_00217 | 272188 | 269003 | 3186  | 0.99  | 100   |
| scaffold01168 | 1610  | 4541  | 2932  | 7.72  | C_unshiu_00054 | 12347  | 9417   | 2931  | 0.49  | 99.56 |
| scaffold01168 | 12022 | 13600 | 1579  | 4.16  | C_unshiu_00054 | 3249   | 1665   | 1585  | 0.27  | 98.11 |
| scaffold01168 | 19540 | 27405 | 7866  | 20.72 | C_unshiu_00639 | 137610 | 129849 | 7762  | 4.9   | 98.4  |
| scaffold01168 | 27428 | 34951 | 7524  | 19.82 | C_unshiu_00951 | 103967 | 111490 | 7524  | 6.75  | 99.92 |
| scaffold01168 | 32884 | 35477 | 2594  | 6.83  | C_unshiu_00013 | 743283 | 745875 | 2593  | 0.28  | 98.15 |
| scaffold01169 | 1     | 1784  | 1784  | 4.71  | C_unshiu_00502 | 61367  | 63150  | 1784  | 0.93  | 100   |
| scaffold01169 | 2867  | 5305  | 2439  | 6.44  | C_unshiu_00502 | 64659  | 67097  | 2439  | 1.28  | 99.92 |
| scaffold01169 | 10457 | 13836 | 3380  | 8.93  | C_unshiu_00502 | 72378  | 75757  | 3380  | 1.77  | 100   |
| scaffold01169 | 15727 | 19578 | 3852  | 10.17 | C_unshiu_00502 | 76406  | 80261  | 3856  | 2.02  | 99.66 |
| scaffold01169 | 19573 | 21276 | 1704  | 4.5   | C_unshiu_00249 | 90589  | 92292  | 1704  | 0.58  | 100   |
| scaffold01169 | 21277 | 27939 | 6663  | 17.6  | C_unshiu_00502 | 82322  | 88984  | 6663  | 3.49  | 100   |
| scaffold01169 | 27942 | 30063 | 2122  | 5.6   | C_unshiu_00502 | 89363  | 91484  | 2122  | 1.11  | 99.72 |
| scaffold01169 | 36397 | 37435 | 1039  | 2.74  | C_unshiu_02479 | 20912  | 19871  | 1042  | 4.12  | 99.14 |
| scaffold01170 | 1     | 2625  | 2625  | 6.97  | C_unshiu_01303 | 12432  | 9808   | 2625  | 3.4   | 100   |
| scaffold01170 | 2620  | 3979  | 1360  | 3.61  | C_unshiu_02368 | 20724  | 19365  | 1360  | 4.87  | 100   |
| scaffold01170 | 4206  | 5712  | 1507  | 4     | C_unshiu_01303 | 7780   | 6274   | 1507  | 1.95  | 98.87 |
| scaffold01170 | 8549  | 11982 | 3434  | 9.12  | C_unshiu_01303 | 4416   | 983    | 3434  | 4.44  | 99.42 |
| scaffold01170 | 21121 | 22821 | 1701  | 4.52  | C_unshiu_00634 | 10913  | 9218   | 1696  | 1.06  | 98.36 |
| scaffold01170 | 27086 | 28641 | 1556  | 4.13  | C_unshiu_00178 | 272807 | 274359 | 1553  | 0.43  | 98.97 |
| scaffold01170 | 29117 | 30571 | 1455  | 3.87  | C_unshiu_00178 | 271741 | 273196 | 1456  | 0.4   | 99.25 |
| scaffold01170 | 33834 | 35201 | 1368  | 3.63  | C_unshiu_00178 | 270841 | 272208 | 1368  | 0.38  | 99.2  |
| scaffold01170 | 35211 | 36226 | 1016  | 2.7   | C_unshiu_00178 | 275320 | 276335 | 1016  | 0.28  | 99.61 |
| scaffold01171 | 3060  | 8992  | 5933  | 15.77 | C_unshiu_00631 | 2275   | 8207   | 5933  | 3.7   | 99.46 |
| scaffold01171 | 15715 | 24396 | 8682  | 23.08 | C_unshiu_00631 | 16353  | 25034  | 8682  | 5.41  | 100   |
| scaffold01171 | 24658 | 34257 | 9600  | 25.52 | C_unshiu_00631 | 25554  | 35156  | 9603  | 5.98  | 99.91 |
| scaffold01172 | 7861  | 18153 | 10293 | 27.55 | C_unshiu_02967 | 13597  | 3308   | 10290 | 74.13 | 99.07 |
| scaffold01172 | 32628 | 34772 | 2145  | 5.74  | C_unshiu_00028 | 453996 | 451852 | 2145  | 0.3   | 100   |
| scaffold01173 | 1229  | 11834 | 10606 | 28.41 | C_unshiu_01769 | 44597  | 33987  | 10611 | 21.37 | 99.74 |
| scaffold01173 | 14499 | 35857 | 21359 | 57.22 | C_unshiu_01769 | 31219  | 9882   | 21338 | 42.97 | 99.59 |
| scaffold01174 | 6003  | 9655  | 3653  | 9.87  | C_unshiu_01701 | 50826  | 47181  | 3646  | 6.95  | 99.62 |
| scaffold01174 | 13786 | 15674 | 1889  | 5.1   | C_unshiu_03062 | 9791   | 7904   | 1888  | 17.33 | 98.89 |
| scaffold01175 | 2769  | 4176  | 1408  | 3.81  | C_unshiu_00181 | 288259 | 286852 | 1408  | 0.39  | 98.01 |
| scaffold01175 | 8233  | 32337 | 24105 | 65.17 | C_unshiu_01097 | 1      | 24105  | 24105 | 25.02 | 99.33 |
| scaffold01176 | 1     | 36531 | 36531 | 100   | C_unshiu_00844 | 26037  | 62569  | 36533 | 29.67 | 99.87 |
| scaffold01177 | 16195 | 19187 | 2993  | 8.21  | C_unshiu_01156 | 21197  | 18205  | 2993  | 3.33  | 99.77 |
| scaffold01177 | 21585 | 24691 | 3107  | 8.52  | C_unshiu_01156 | 15174  | 12077  | 3098  | 3.45  | 98.91 |
| scaffold01178 | 10813 | 15550 | 4738  | 13.03 | C_unshiu_00056 | 443080 | 438343 | 4738  | 0.8   | 100   |
| scaffold01178 | 17974 | 31506 | 13533 | 37.22 | C_unshiu_00056 | 435960 | 422466 | 13495 | 2.27  | 98.75 |
| scaffold01178 | 31510 | 35953 | 4444  | 12.22 | C_unshiu_00021 | 325834 | 321380 | 4455  | 0.57  | 99.62 |
| scaffold01179 | 1     | 1409  | 1409  | 3.89  | C_unshiu_00539 | 165430 | 164021 | 1410  | 0.78  | 99.93 |
| scaffold01179 | 10368 | 23931 | 13564 | 37.4  | C_unshiu_00539 | 154971 | 141403 | 13569 | 7.49  | 98.85 |
| scaffold01179 | 26131 | 32585 | 6455  | 17.8  | C_unshiu_01985 | 23246  | 29721  | 6476  | 15.77 | 99.26 |
| scaffold01179 | 33065 | 36263 | 3199  | 8.82  | C_unshiu_00539 | 137266 | 134068 | 3199  | 1.77  | 99.91 |
| scaffold01180 | 635   | 2989  | 2355  | 6.49  | C_unshiu_00574 | 241    | 2595   | 2355  | 1.37  | 100   |
| scaffold01180 | 14631 | 15809 | 1179  | 3.25  | C_unshiu_00574 | 36309  | 37487  | 1179  | 0.68  | 100   |
| scaffold01180 | 18287 | 23473 | 5187  | 14.3  | C_unshiu_00574 | 39378  | 44571  | 5194  | 3.01  | 99.61 |
| scaffold01180 | 23583 | 25370 | 1788  | 4.93  | C_unshiu_00574 | 49574  | 47787  | 1788  | 1.04  | 99.44 |
| scaffold01180 | 26760 | 28235 | 1476  | 4.07  | C_unshiu_00574 | 6008   | 7483   | 1476  | 0.86  | 99.93 |
| scaffold01180 | 28856 | 33025 | 4170  | 11.49 | C_unshiu_00574 | 7687   | 11859  | 4173  | 2.42  | 98.52 |
| scaffold01182 | 847   | 2173  | 1327  | 3.66  | C_unshiu_00161 | 136346 | 135017 | 1330  | 0.36  | 98.65 |
| scaffold01182 | 2232  | 11390 | 9159  | 25.25 | C_unshiu_00161 | 124275 | 115111 | 9165  | 2.46  | 99.41 |
| scaffold01182 | 11641 | 14256 | 2616  | 7.21  | C_unshiu_00161 | 113152 | 110537 | 2616  | 0.7   | 99.92 |
| scaffold01182 | 14849 | 17613 | 2765  | 7.62  | C_unshiu_00161 | 109600 | 106836 | 2765  | 0.74  | 100   |
| scaffold01182 | 17637 | 24208 | 6572  | 18.12 | C_unshiu_00161 | 105563 | 98992  | 6572  | 1.77  | 100   |
| scaffold01182 | 26967 | 28352 | 1386  | 3.82  | C_unshiu_00161 | 97388  | 96002  | 1387  | 0.37  | 98.92 |
| scaffold01182 | 26987 | 28352 | 1366  | 3.77  | C_unshiu_00404 | 45644  | 47012  | 1369  | 0.62  | 99.63 |
| scaffold01182 | 29844 | 32034 | 2191  | 6.04  | C_unshiu_02015 | 34320  | 36505  | 2186  | 5.45  | 99.54 |
| scaffold01182 | 32034 | 33986 | 1953  | 5.38  | C_unshiu_00404 | 48072  | 50024  | 1953  | 0.88  | 99.34 |
| scaffold01183 | 826   | 3912  | 3087  | 8.53  | C_unshiu_00966 | 36019  | 39105  | 3087  | 2.8   | 100   |
| scaffold01183 | 14537 | 16449 | 1913  | 5.28  | C_unshiu_00147 | 928    | 2827   | 1900  | 0.49  | 98.38 |
| scaffold01183 | 24055 | 25243 | 1189  | 3.28  | C_unshiu_00234 | 1937   | 746    | 1192  | 0.39  | 98.66 |
| scaffold01183 | 25353 | 29699 | 4347  | 12.01 | C_unshiu_00147 | 10526  | 14857  | 4332  | 1.11  | 99.08 |
| scaffold01183 | 33080 | 35368 | 2289  | 6.32  | C_unshiu_00959 | 25712  | 28000  | 2289  | 2.07  | 100   |
| scaffold01184 | 4418  | 6439  | 2022  | 5.61  | C_unshiu_00257 | 216702 | 218727 | 2026  | 0.7   | 98.13 |
| scaffold01184 | 11857 | 15325 | 3469  | 9.63  | C_unshiu_00521 | 18443  | 14975  | 3469  | 1.87  | 100   |
| scaffold01184 | 15326 | 18293 | 2968  | 8.24  | C_unshiu_01827 | 2914   | 5884   | 2971  | 6.26  | 99.63 |
| scaffold01184 | 23550 | 36036 | 12487 | 34.65 | C_unshiu_02919 | 9      | 12493  | 12485 | 81.48 | 98.3  |
| scaffold01185 | 1623  | 3166  | 1544  | 4.29  | C_unshiu_01138 | 74576  | 76131  | 1556  | 1.69  | 98.26 |
| scaffold01185 | 4694  | 6066  | 1373  | 3.82  | C_unshiu_01138 | 78566  | 79938  | 1373  | 1.49  | 99.05 |
| scaffold01185 | 6149  | 18076 | 11928 | 33.17 | C_unshiu_01138 | 80347  | 92197  | 11851 | 12.85 | 98.16 |
| scaffold01185 | 16053 | 23134 | 7082  | 19.7  | C_unshiu_02199 | 33232  | 26145  | 7088  | 21.33 | 99.3  |
| scaffold01185 | 23894 | 27420 | 3527  | 9.81  | C_unshiu_02199 | 25055  | 21512  | 3544  | 10.66 | 98.96 |
| scaffold01185 | 27523 | 33367 | 5845  | 16.26 | C_unshiu_02199 | 21378  | 15530  | 5849  | 17.6  | 99.88 |
| scaffold01185 | 33525 | 35689 | 2165  | 6.02  | C_unshiu_02199 | 6322   | 8494   | 2173  | 6.54  | 99.63 |
| scaffold01186 | 30593 | 32928 | 2336  | 6.5   | C_unshiu_00333 | 44182  | 41843  | 2340  | 0.93  | 99.79 |
| scaffold01187 | 26171 | 32711 | 6541  | 18.23 | C_unshiu_02427 | 2721   | 9253   | 6533  | 24.43 | 99.27 |
| scaffold01188 | 1     | 2306  | 2306  | 6.44  | C_unshiu_01176 | 34829  | 37134  | 2306  | 2.62  | 99.78 |
| scaffold01188 | 4163  | 29734 | 25572 | 71.38 | C_unshiu_01176 | 37136  | 62705  | 25570 | 29.09 | 99.45 |

|               |       |       |       |       |                |        |        |       |       |       |
|---------------|-------|-------|-------|-------|----------------|--------|--------|-------|-------|-------|
| scaffold01188 | 33792 | 35826 | 2035  | 5.68  | C_unshiu_01176 | 66169  | 68203  | 2035  | 2.32  | 100   |
| scaffold01189 | 15959 | 30277 | 14319 | 40.06 | C_unshiu_00433 | 17311  | 31629  | 14319 | 6.69  | 99.87 |
| scaffold01189 | 31331 | 34969 | 3639  | 10.18 | C_unshiu_00433 | 32498  | 36136  | 3639  | 1.7   | 100   |
| scaffold01190 | 1     | 17012 | 17012 | 47.75 | C_unshiu_01614 | 28797  | 11774  | 17024 | 29.92 | 99.74 |
| scaffold01191 | 6545  | 8532  | 1988  | 5.6   | C_unshiu_00653 | 60031  | 58041  | 1991  | 1.28  | 99.55 |
| scaffold01191 | 16962 | 18783 | 1822  | 5.13  | C_unshiu_00653 | 50986  | 49165  | 1822  | 1.18  | 100   |
| scaffold01191 | 22773 | 23975 | 1203  | 3.39  | C_unshiu_00653 | 42809  | 41607  | 1203  | 0.78  | 100   |
| scaffold01191 | 23994 | 25189 | 1196  | 3.37  | C_unshiu_00653 | 40820  | 39625  | 1196  | 0.77  | 100   |
| scaffold01191 | 25180 | 27296 | 2117  | 5.96  | C_unshiu_00423 | 210453 | 208337 | 2117  | 0.97  | 99.95 |
| scaffold01191 | 34015 | 35109 | 1095  | 3.08  | C_unshiu_00653 | 30866  | 29775  | 1092  | 0.7   | 99    |
| scaffold01192 | 372   | 2355  | 1984  | 5.59  | C_unshiu_00084 | 42215  | 44206  | 1992  | 0.42  | 99.3  |
| scaffold01192 | 3132  | 14080 | 10949 | 30.87 | C_unshiu_00084 | 45402  | 56422  | 11021 | 2.33  | 98.87 |
| scaffold01192 | 14162 | 19176 | 5015  | 14.14 | C_unshiu_02154 | 19148  | 14106  | 5043  | 14.43 | 98.61 |
| scaffold01192 | 19536 | 29580 | 10045 | 28.32 | C_unshiu_02154 | 12546  | 2507   | 10040 | 28.73 | 99.61 |
| scaffold01192 | 28184 | 35467 | 7284  | 20.54 | C_unshiu_00016 | 375082 | 367794 | 7289  | 0.83  | 98.89 |
| scaffold01193 | 1     | 12720 | 12720 | 35.87 | C_unshiu_00030 | 501120 | 513831 | 12712 | 1.79  | 99.81 |
| scaffold01193 | 12755 | 17552 | 4798  | 13.53 | C_unshiu_00030 | 513928 | 518711 | 4784  | 0.67  | 99.42 |
| scaffold01193 | 17534 | 35459 | 17926 | 50.55 | C_unshiu_00030 | 518793 | 536689 | 17897 | 2.52  | 99.29 |
| scaffold01194 | 1756  | 4821  | 3066  | 8.66  | C_unshiu_00859 | 3055   | 1      | 3055  | 2.51  | 98.86 |
| scaffold01194 | 4310  | 7320  | 3011  | 8.51  | C_unshiu_02314 | 29522  | 26503  | 3020  | 10.23 | 99.14 |
| scaffold01194 | 8175  | 11580 | 3406  | 9.62  | C_unshiu_02314 | 25349  | 21954  | 3396  | 11.5  | 99.38 |
| scaffold01194 | 16866 | 18855 | 1990  | 5.62  | C_unshiu_02314 | 15128  | 13127  | 2002  | 6.78  | 98.35 |
| scaffold01194 | 24148 | 26390 | 2243  | 6.34  | C_unshiu_02314 | 11493  | 9251   | 2243  | 7.6   | 99.64 |
| scaffold01194 | 26389 | 28322 | 1934  | 5.46  | C_unshiu_01131 | 81150  | 83082  | 1933  | 2.09  | 99.9  |
| scaffold01194 | 30527 | 35394 | 4868  | 13.75 | C_unshiu_01085 | 97487  | 92620  | 4868  | 4.99  | 100   |
| scaffold01195 | 4465  | 20708 | 16244 | 46.01 | C_unshiu_01342 | 34472  | 50682  | 16211 | 21.78 | 99.53 |
| scaffold01195 | 21238 | 23246 | 2009  | 5.69  | C_unshiu_01342 | 51667  | 53667  | 2001  | 2.69  | 99.4  |
| scaffold01195 | 24100 | 25787 | 1688  | 4.78  | C_unshiu_01342 | 54751  | 56438  | 1688  | 2.27  | 100   |
| scaffold01195 | 28374 | 30088 | 1715  | 4.86  | C_unshiu_00117 | 11583  | 13301  | 1719  | 0.4   | 98.72 |
| scaffold01195 | 30262 | 31545 | 1284  | 3.64  | C_unshiu_01342 | 58738  | 60021  | 1284  | 1.73  | 99.45 |
| scaffold01195 | 33324 | 34544 | 1221  | 3.46  | C_unshiu_00117 | 17582  | 18802  | 1221  | 0.28  | 99.84 |
| scaffold01196 | 9170  | 11258 | 2089  | 5.93  | C_unshiu_00717 | 81794  | 79698  | 2097  | 1.48  | 98.76 |
| scaffold01196 | 15441 | 16548 | 1108  | 3.15  | C_unshiu_00230 | 97130  | 98237  | 1108  | 0.36  | 100   |
| scaffold01196 | 20500 | 22422 | 1923  | 5.46  | C_unshiu_00702 | 16262  | 18196  | 1935  | 1.35  | 98.81 |
| scaffold01196 | 23129 | 26483 | 3355  | 9.52  | C_unshiu_01061 | 97256  | 93902  | 3355  | 3.39  | 99.73 |
| scaffold01197 | 6329  | 16482 | 10154 | 28.86 | C_unshiu_00028 | 403449 | 393320 | 10130 | 1.41  | 99.75 |
| scaffold01197 | 16515 | 32715 | 16201 | 46.04 | C_unshiu_00028 | 393214 | 377105 | 16110 | 2.24  | 99.09 |
| scaffold01197 | 31422 | 32718 | 1297  | 3.69  | C_unshiu_00017 | 417278 | 415978 | 1301  | 0.15  | 98.47 |
| scaffold01198 | 7641  | 12571 | 4931  | 14.03 | C_unshiu_00133 | 378832 | 383763 | 4932  | 1.2   | 99.98 |
| scaffold01198 | 17929 | 20866 | 2938  | 8.36  | C_unshiu_00133 | 383763 | 386698 | 2936  | 0.71  | 98.5  |
| scaffold01198 | 20981 | 22641 | 1661  | 4.73  | C_unshiu_00133 | 386698 | 388358 | 1661  | 0.4   | 99.94 |
| scaffold01198 | 22673 | 33413 | 10741 | 30.57 | C_unshiu_00133 | 388956 | 399695 | 10740 | 2.61  | 99.73 |
| scaffold01199 | 3863  | 5022  | 1160  | 3.31  | C_unshiu_00668 | 146232 | 147391 | 1160  | 0.76  | 98.88 |
| scaffold01199 | 7257  | 8417  | 1161  | 3.31  | C_unshiu_00668 | 146710 | 147857 | 1148  | 0.75  | 98.71 |
| scaffold01200 | 1     | 1179  | 1179  | 3.37  | C_unshiu_00458 | 128194 | 129375 | 1182  | 0.58  | 98.56 |
| scaffold01200 | 9770  | 21685 | 11916 | 34.02 | C_unshiu_00458 | 83513  | 95417  | 11905 | 5.8   | 99.28 |
| scaffold01200 | 21743 | 25741 | 3999  | 11.42 | C_unshiu_00560 | 88263  | 84265  | 3999  | 2.28  | 100   |
| scaffold01200 | 33412 | 34986 | 1575  | 4.5   | C_unshiu_00458 | 103462 | 105038 | 1577  | 0.77  | 99.05 |
| scaffold01201 | 2426  | 4269  | 1844  | 5.29  | C_unshiu_01233 | 70439  | 72282  | 1844  | 2.25  | 98.75 |
| scaffold01201 | 3249  | 4269  | 1021  | 2.93  | C_unshiu_01466 | 65576  | 64555  | 1022  | 1.56  | 99.71 |
| scaffold01201 | 5676  | 20260 | 14585 | 41.85 | C_unshiu_01466 | 62446  | 47847  | 14600 | 22.26 | 99.71 |
| scaffold01202 | 6531  | 10843 | 4313  | 12.38 | C_unshiu_00092 | 156803 | 152497 | 4307  | 0.92  | 99.05 |
| scaffold01202 | 21950 | 23529 | 1580  | 4.54  | C_unshiu_00092 | 145707 | 144127 | 1581  | 0.34  | 98.93 |
| scaffold01203 | 1     | 2142  | 2142  | 6.16  | C_unshiu_01886 | 25158  | 27299  | 2142  | 4.74  | 100   |
| scaffold01203 | 3190  | 9691  | 6502  | 18.71 | C_unshiu_01886 | 28813  | 35315  | 6503  | 14.4  | 99.94 |
| scaffold01203 | 9684  | 11588 | 1905  | 5.48  | C_unshiu_00227 | 196266 | 198170 | 1905  | 0.62  | 100   |
| scaffold01203 | 11589 | 20348 | 8760  | 25.2  | C_unshiu_01886 | 36399  | 45158  | 8760  | 19.4  | 99.82 |
| scaffold01204 | 7901  | 9324  | 1424  | 4.1   | C_unshiu_03017 | 11498  | 10077  | 1422  | 11.4  | 98.6  |
| scaffold01204 | 9337  | 14663 | 5327  | 15.34 | C_unshiu_03017 | 7992   | 2665   | 5328  | 42.73 | 99.98 |
| scaffold01204 | 16678 | 20531 | 3854  | 11.1  | C_unshiu_02007 | 8618   | 4762   | 3857  | 9.53  | 98.63 |
| scaffold01204 | 27307 | 28373 | 1067  | 3.07  | C_unshiu_00282 | 248870 | 249939 | 1070  | 0.39  | 98.22 |
| scaffold01205 | 1     | 14026 | 14026 | 40.36 | C_unshiu_01931 | 28253  | 14228  | 14026 | 32.24 | 100   |
| scaffold01205 | 14064 | 16749 | 2686  | 7.73  | C_unshiu_01931 | 13630  | 10945  | 2686  | 6.17  | 99.59 |
| scaffold01205 | 17167 | 27749 | 10583 | 30.45 | C_unshiu_01931 | 10600  | 1      | 10600 | 24.37 | 99.82 |
| scaffold01205 | 33212 | 34750 | 1539  | 4.43  | C_unshiu_01443 | 16542  | 15000  | 1543  | 2.29  | 98.77 |
| scaffold01207 | 11569 | 17176 | 5608  | 16.15 | C_unshiu_00829 | 16447  | 10860  | 5588  | 4.47  | 99.32 |
| scaffold01207 | 21958 | 23611 | 1654  | 4.76  | C_unshiu_00829 | 6818   | 5165   | 1654  | 1.32  | 100   |
| scaffold01207 | 25176 | 27852 | 2677  | 7.71  | C_unshiu_00829 | 3045   | 362    | 2684  | 2.15  | 99.74 |
| scaffold01207 | 25390 | 27852 | 2463  | 7.1   | C_unshiu_02695 | 19933  | 17464  | 2470  | 12.39 | 99.64 |
| scaffold01207 | 27998 | 29645 | 1648  | 4.75  | C_unshiu_00222 | 304367 | 302720 | 1648  | 0.52  | 99.82 |
| scaffold01208 | 1     | 7142  | 7142  | 20.59 | C_unshiu_01819 | 11844  | 18985  | 7142  | 14.93 | 100   |
| scaffold01208 | 9150  | 15345 | 6196  | 17.86 | C_unshiu_01819 | 19726  | 25921  | 6196  | 12.95 | 100   |
| scaffold01208 | 19485 | 34684 | 15200 | 43.82 | C_unshiu_01819 | 29583  | 44780  | 15198 | 31.77 | 99.88 |
| scaffold01209 | 1     | 1889  | 1889  | 5.46  | C_unshiu_00695 | 69952  | 71840  | 1889  | 1.31  | 99.1  |
| scaffold01209 | 7885  | 9400  | 1516  | 4.38  | C_unshiu_00695 | 78696  | 80211  | 1516  | 1.05  | 98.95 |
| scaffold01209 | 13547 | 17708 | 4162  | 12.03 | C_unshiu_02167 | 22316  | 18155  | 4162  | 12.06 | 100   |
| scaffold01209 | 17707 | 21699 | 3993  | 11.54 | C_unshiu_00695 | 88022  | 92014  | 3993  | 2.77  | 99.97 |
| scaffold01209 | 32332 | 33541 | 1210  | 3.5   | C_unshiu_00673 | 33434  | 34643  | 1210  | 0.8   | 100   |
| scaffold01209 | 33534 | 34607 | 1074  | 3.1   | C_unshiu_00695 | 103166 | 104240 | 1075  | 0.74  | 99.81 |

|               |       |       |       |       |                |        |        |       |       |       |
|---------------|-------|-------|-------|-------|----------------|--------|--------|-------|-------|-------|
| scaffold01210 | 1     | 7958  | 7958  | 23.05 | C_unshiu_02090 | 36086  | 28136  | 7951  | 21.49 | 99.82 |
| scaffold01210 | 8061  | 32747 | 24687 | 71.51 | C_unshiu_02090 | 28027  | 3326   | 24702 | 66.75 | 99.84 |
| scaffold01211 | 1     | 5632  | 5632  | 16.41 | C_unshiu_01488 | 58162  | 63793  | 5632  | 8.83  | 99.95 |
| scaffold01211 | 5385  | 14638 | 9254  | 26.96 | C_unshiu_01488 | 10     | 9312   | 9303  | 14.58 | 98.3  |
| scaffold01211 | 16415 | 17912 | 1498  | 4.36  | C_unshiu_01488 | 9634   | 11131  | 1498  | 2.35  | 100   |
| scaffold01211 | 18269 | 20737 | 2469  | 7.19  | C_unshiu_01488 | 11819  | 14287  | 2469  | 3.87  | 100   |
| scaffold01211 | 20730 | 22001 | 1272  | 3.71  | C_unshiu_00417 | 46686  | 47957  | 1272  | 0.58  | 100   |
| scaffold01211 | 22007 | 28793 | 6787  | 19.78 | C_unshiu_01488 | 16068  | 22855  | 6788  | 10.64 | 99.48 |
| scaffold01211 | 29156 | 34319 | 5164  | 15.05 | C_unshiu_00448 | 51724  | 56889  | 5166  | 2.48  | 99.96 |
| scaffold01212 | 58    | 13991 | 13934 | 40.64 | C_unshiu_00508 | 187865 | 174053 | 13813 | 7.31  | 98.75 |
| scaffold01212 | 20002 | 30651 | 10650 | 31.06 | C_unshiu_02056 | 28106  | 17456  | 10651 | 27.76 | 99.97 |
| scaffold01212 | 30878 | 34290 | 3413  | 9.95  | C_unshiu_02056 | 16793  | 13381  | 3413  | 8.9   | 100   |
| scaffold01213 | 9230  | 19998 | 10769 | 31.53 | C_unshiu_00498 | 186876 | 176076 | 10801 | 5.62  | 98.26 |
| scaffold01213 | 23101 | 25074 | 1974  | 5.78  | C_unshiu_02150 | 11070  | 13054  | 1985  | 5.65  | 98.19 |
| scaffold01214 | 1     | 17105 | 17105 | 50.13 | C_unshiu_01450 | 49480  | 66554  | 17075 | 25.66 | 99.6  |
| scaffold01214 | 18190 | 20228 | 2039  | 5.98  | C_unshiu_02896 | 15573  | 13550  | 2024  | 12.8  | 98.39 |
| scaffold01214 | 24472 | 34122 | 9651  | 28.28 | C_unshiu_02896 | 9716   | 66     | 9651  | 61.04 | 100   |
| scaffold01215 | 721   | 1982  | 1262  | 3.7   | C_unshiu_00484 | 36597  | 37858  | 1262  | 0.64  | 100   |
| scaffold01215 | 1972  | 21049 | 19078 | 55.94 | C_unshiu_00149 | 11918  | 30980  | 19063 | 4.93  | 99.83 |
| scaffold01215 | 23861 | 25051 | 1191  | 3.49  | C_unshiu_00149 | 32567  | 33757  | 1191  | 0.31  | 100   |
| scaffold01215 | 25437 | 34102 | 8666  | 25.41 | C_unshiu_00149 | 34318  | 42984  | 8667  | 2.24  | 99.38 |
| scaffold01216 | 539   | 2310  | 1772  | 5.22  | C_unshiu_02042 | 18051  | 16280  | 1772  | 4.54  | 100   |
| scaffold01216 | 3099  | 11865 | 8767  | 25.82 | C_unshiu_00910 | 78687  | 87453  | 8767  | 7.56  | 100   |
| scaffold01216 | 11866 | 13012 | 1147  | 3.38  | C_unshiu_01191 | 52207  | 53353  | 1147  | 1.33  | 100   |
| scaffold01216 | 13007 | 33956 | 20950 | 61.7  | C_unshiu_00910 | 89140  | 110071 | 20932 | 18.05 | 99.87 |
| scaffold01218 | 1     | 13234 | 13234 | 38.96 | C_unshiu_00349 | 49337  | 62574  | 13238 | 5.44  | 99.92 |
| scaffold01218 | 17866 | 19824 | 1959  | 5.77  | C_unshiu_00349 | 66679  | 68637  | 1959  | 0.81  | 99.8  |
| scaffold01218 | 19812 | 23355 | 3544  | 10.43 | C_unshiu_00349 | 68436  | 71979  | 3544  | 1.46  | 100   |
| scaffold01218 | 24720 | 26832 | 2113  | 6.22  | C_unshiu_00349 | 73865  | 75977  | 2113  | 0.87  | 100   |
| scaffold01219 | 3     | 18514 | 18512 | 54.52 | C_unshiu_00661 | 35508  | 17026  | 18483 | 12.05 | 99.1  |
| scaffold01219 | 19108 | 20355 | 1248  | 3.68  | C_unshiu_00661 | 15853  | 14606  | 1248  | 0.81  | 100   |
| scaffold01219 | 21575 | 33749 | 12175 | 35.86 | C_unshiu_00661 | 13095  | 875    | 12221 | 7.97  | 99.42 |
| scaffold01219 | 28732 | 33952 | 5221  | 15.38 | C_unshiu_00661 | 5892   | 633    | 5260  | 3.43  | 99.26 |
| scaffold01220 | 2234  | 3739  | 1506  | 4.44  | C_unshiu_01632 | 19342  | 20853  | 1512  | 2.71  | 98.15 |
| scaffold01221 | 1057  | 5425  | 4369  | 12.89 | C_unshiu_01262 | 1957   | 6325   | 4369  | 5.47  | 99.89 |
| scaffold01221 | 5756  | 11506 | 5751  | 16.96 | C_unshiu_01262 | 6931   | 12676  | 5746  | 7.19  | 99.72 |
| scaffold01221 | 12824 | 18164 | 5341  | 15.76 | C_unshiu_01262 | 14379  | 19720  | 5342  | 6.68  | 99.93 |
| scaffold01221 | 18180 | 31127 | 12948 | 38.19 | C_unshiu_01143 | 28570  | 41502  | 12933 | 14.1  | 99.78 |
| scaffold01222 | 2869  | 4401  | 1533  | 4.53  | C_unshiu_00663 | 20524  | 22056  | 1533  | 1     | 100   |
| scaffold01222 | 17678 | 28096 | 10419 | 30.8  | C_unshiu_02816 | 10416  | 1      | 10416 | 59.42 | 99.95 |
| scaffold01223 | 1     | 1152  | 1152  | 3.41  | C_unshiu_02911 | 5741   | 6904   | 1164  | 7.5   | 98.28 |
| scaffold01223 | 6143  | 8851  | 2709  | 8.03  | C_unshiu_02911 | 11745  | 14454  | 2710  | 17.46 | 99.67 |
| scaffold01223 | 15512 | 22886 | 7375  | 21.86 | C_unshiu_01492 | 55695  | 48319  | 7377  | 11.58 | 99.58 |
| scaffold01224 | 1     | 3241  | 3241  | 9.63  | C_unshiu_00326 | 144339 | 147573 | 3235  | 1.27  | 99.41 |
| scaffold01224 | 4972  | 9215  | 4244  | 12.61 | C_unshiu_00326 | 150038 | 154276 | 4239  | 1.67  | 99.01 |
| scaffold01224 | 22386 | 26505 | 4120  | 12.24 | C_unshiu_00326 | 166942 | 171085 | 4144  | 1.63  | 99.3  |
| scaffold01224 | 30437 | 33199 | 2763  | 8.21  | C_unshiu_00326 | 174436 | 177233 | 2798  | 1.1   | 98.11 |
| scaffold01225 | 14176 | 15352 | 1177  | 3.5   | C_unshiu_00846 | 40058  | 41234  | 1177  | 0.96  | 100   |
| scaffold01225 | 26855 | 28217 | 1363  | 4.05  | C_unshiu_01500 | 52596  | 53957  | 1362  | 2.15  | 99.71 |
| scaffold01225 | 31288 | 32483 | 1196  | 3.56  | C_unshiu_00943 | 45483  | 46678  | 1196  | 1.07  | 100   |
| scaffold01226 | 1     | 23641 | 23641 | 70.51 | C_unshiu_01873 | 30905  | 7253   | 23653 | 51.84 | 99.89 |
| scaffold01226 | 23180 | 29534 | 6355  | 18.95 | C_unshiu_01873 | 7232   | 888    | 6345  | 13.91 | 99.73 |
| scaffold01227 | 7375  | 13441 | 6067  | 18.1  | C_unshiu_00970 | 1      | 6068   | 6068  | 5.54  | 99.92 |
| scaffold01227 | 14220 | 23549 | 9330  | 27.84 | C_unshiu_00970 | 6922   | 16250  | 9329  | 8.51  | 99.95 |
| scaffold01227 | 26137 | 28178 | 2042  | 6.09  | C_unshiu_00661 | 46399  | 48440  | 2042  | 1.33  | 100   |
| scaffold01227 | 26145 | 33074 | 6930  | 20.68 | C_unshiu_00538 | 147753 | 154683 | 6931  | 3.82  | 99.99 |
| scaffold01228 | 1596  | 21327 | 19732 | 58.95 | C_unshiu_00669 | 8788   | 28511  | 19724 | 12.92 | 99.76 |
| scaffold01228 | 26869 | 33263 | 6395  | 19.11 | C_unshiu_00728 | 73764  | 67369  | 6396  | 4.6   | 99.25 |
| scaffold01229 | 10734 | 11863 | 1130  | 3.38  | C_unshiu_00101 | 373174 | 374303 | 1130  | 0.25  | 99.65 |
| scaffold01229 | 12762 | 13900 | 1139  | 3.41  | C_unshiu_00101 | 371800 | 372938 | 1139  | 0.25  | 99.91 |
| scaffold01229 | 14295 | 15318 | 1024  | 3.07  | C_unshiu_00254 | 53840  | 52817  | 1024  | 0.35  | 99.71 |
| scaffold01229 | 15324 | 19458 | 4135  | 12.38 | C_unshiu_00514 | 165811 | 161673 | 4139  | 2.21  | 99.81 |
| scaffold01229 | 19475 | 21266 | 1792  | 5.37  | C_unshiu_00514 | 160578 | 158787 | 1792  | 0.96  | 99.94 |
| scaffold01229 | 30437 | 33398 | 2962  | 8.87  | C_unshiu_00874 | 25435  | 22488  | 2948  | 2.46  | 99.26 |
| scaffold01230 | 17030 | 20738 | 3709  | 11.12 | C_unshiu_00835 | 48904  | 45251  | 3654  | 2.94  | 98.36 |
| scaffold01230 | 24668 | 30702 | 6035  | 18.09 | C_unshiu_00835 | 40728  | 34735  | 5994  | 4.82  | 98.82 |
| scaffold01231 | 5647  | 25809 | 20163 | 60.5  | C_unshiu_00635 | 42388  | 22302  | 20087 | 12.56 | 98.93 |
| scaffold01231 | 26039 | 33325 | 7287  | 21.87 | C_unshiu_00635 | 55393  | 62651  | 7259  | 4.54  | 99.27 |
| scaffold01232 | 4297  | 20158 | 15862 | 47.73 | C_unshiu_00594 | 52480  | 36608  | 15873 | 9.41  | 99.74 |
| scaffold01232 | 18920 | 31410 | 12491 | 37.59 | C_unshiu_00594 | 34485  | 21999  | 12487 | 7.4   | 99.5  |
| scaffold01232 | 31411 | 32489 | 1079  | 3.25  | C_unshiu_01372 | 35670  | 36748  | 1079  | 1.48  | 100   |
| scaffold01234 | 1     | 2590  | 2590  | 7.83  | C_unshiu_01489 | 48688  | 51285  | 2598  | 4.07  | 99.5  |
| scaffold01234 | 6286  | 7879  | 1594  | 4.82  | C_unshiu_01197 | 67460  | 65867  | 1594  | 1.85  | 99.62 |
| scaffold01234 | 13541 | 16392 | 2852  | 8.62  | C_unshiu_00155 | 359715 | 356883 | 2833  | 0.74  | 98.53 |
| scaffold01234 | 16961 | 19982 | 3022  | 9.13  | C_unshiu_01197 | 57422  | 54399  | 3024  | 3.51  | 99.93 |
| scaffold01234 | 26069 | 28063 | 1995  | 6.03  | C_unshiu_01197 | 48636  | 46634  | 2003  | 2.33  | 98.55 |
| scaffold01234 | 28828 | 30165 | 1338  | 4.04  | C_unshiu_01197 | 45443  | 44106  | 1338  | 1.55  | 99.4  |
| scaffold01234 | 30611 | 33084 | 2474  | 7.48  | C_unshiu_01197 | 43365  | 40905  | 2461  | 2.86  | 98.51 |
| scaffold01235 | 21172 | 26074 | 4903  | 14.81 | C_unshiu_02875 | 1      | 4898   | 4898  | 29.96 | 99.04 |

|               |       |       |       |       |                |        |        |       |       |       |
|---------------|-------|-------|-------|-------|----------------|--------|--------|-------|-------|-------|
| scaffold01235 | 26097 | 29570 | 3474  | 10.49 | C_unshiu_02875 | 5083   | 8554   | 3472  | 21.24 | 99.57 |
| scaffold01235 | 32047 | 33114 | 1068  | 3.23  | C_unshiu_02875 | 11210  | 12277  | 1068  | 6.53  | 99.91 |
| scaffold01236 | 1     | 32650 | 32650 | 98.77 | C_unshiu_00813 | 20499  | 53144  | 32646 | 25.68 | 99.87 |
| scaffold01236 | 31146 | 33058 | 1913  | 5.79  | C_unshiu_00907 | 93124  | 91211  | 1914  | 1.65  | 98.85 |
| scaffold01238 | 1     | 7073  | 7073  | 21.45 | C_unshiu_02735 | 3073   | 10144  | 7072  | 36.75 | 99.73 |
| scaffold01238 | 7017  | 8051  | 1035  | 3.14  | C_unshiu_02735 | 10125  | 11152  | 1028  | 5.34  | 98.26 |
| scaffold01238 | 13550 | 17599 | 4050  | 12.28 | C_unshiu_00899 | 61707  | 57666  | 4042  | 3.45  | 99.61 |
| scaffold01238 | 17591 | 31252 | 13662 | 41.43 | C_unshiu_00899 | 57019  | 43361  | 13659 | 11.66 | 98.18 |
| scaffold01239 | 7016  | 8134  | 1119  | 3.4   | C_unshiu_01347 | 31883  | 30764  | 1120  | 1.51  | 99.55 |
| scaffold01239 | 11259 | 13214 | 1956  | 5.93  | C_unshiu_01347 | 4311   | 2367   | 1945  | 2.62  | 98.52 |
| scaffold01239 | 21564 | 23235 | 1672  | 5.07  | C_unshiu_02612 | 3009   | 4688   | 1680  | 7.71  | 98.75 |
| scaffold01240 | 3985  | 6269  | 2285  | 6.94  | C_unshiu_01773 | 28800  | 31085  | 2286  | 4.62  | 98.73 |
| scaffold01240 | 5343  | 10727 | 5385  | 16.35 | C_unshiu_01773 | 14574  | 9218   | 5357  | 10.82 | 98.67 |
| scaffold01240 | 10906 | 15733 | 4828  | 14.66 | C_unshiu_01773 | 8932   | 4104   | 4829  | 9.75  | 99.17 |
| scaffold01240 | 16640 | 19455 | 2816  | 8.55  | C_unshiu_01773 | 2801   | 1      | 2801  | 5.66  | 99.18 |
| scaffold01240 | 28792 | 30494 | 1703  | 5.17  | C_unshiu_00660 | 46468  | 44765  | 1704  | 1.11  | 98.24 |
| scaffold01241 | 29366 | 32923 | 3558  | 10.81 | C_unshiu_00715 | 128841 | 132379 | 3539  | 2.49  | 99.16 |
| scaffold01242 | 1     | 21608 | 21608 | 65.63 | C_unshiu_00040 | 478204 | 456604 | 21601 | 3.28  | 99.75 |
| scaffold01242 | 21111 | 32922 | 11812 | 35.88 | C_unshiu_02097 | 12021  | 23834  | 11814 | 32.23 | 99.98 |
| scaffold01243 | 493   | 7220  | 6728  | 20.45 | C_unshiu_02150 | 4191   | 10902  | 6712  | 19.12 | 98.32 |
| scaffold01243 | 10512 | 16906 | 6395  | 19.44 | C_unshiu_02150 | 12904  | 19308  | 6405  | 18.25 | 99.2  |
| scaffold01243 | 18657 | 22187 | 3531  | 10.73 | C_unshiu_02150 | 31346  | 34897  | 3552  | 10.12 | 98.37 |
| scaffold01243 | 24141 | 25379 | 1239  | 3.77  | C_unshiu_02150 | 33865  | 35104  | 1240  | 3.53  | 99.92 |
| scaffold01243 | 25227 | 27944 | 2718  | 8.26  | C_unshiu_01832 | 43174  | 40462  | 2713  | 5.73  | 99.37 |
| scaffold01244 | 1505  | 20740 | 19236 | 58.52 | C_unshiu_01019 | 70685  | 51526  | 19160 | 18.42 | 98.99 |
| scaffold01244 | 21491 | 32783 | 11293 | 34.36 | C_unshiu_01019 | 52120  | 40822  | 11299 | 10.86 | 99.87 |
| scaffold01245 | 15015 | 20339 | 5325  | 16.26 | C_unshiu_00818 | 67529  | 72846  | 5318  | 4.2   | 99.83 |
| scaffold01245 | 21275 | 26375 | 5101  | 15.57 | C_unshiu_00818 | 73945  | 79045  | 5101  | 4.03  | 99.92 |
| scaffold01245 | 26389 | 27464 | 1076  | 3.28  | C_unshiu_01306 | 61733  | 62808  | 1076  | 1.4   | 100   |
| scaffold01245 | 28552 | 29898 | 1347  | 4.11  | C_unshiu_01306 | 63507  | 64853  | 1347  | 1.76  | 100   |
| scaffold01246 | 155   | 1669  | 1515  | 4.63  | C_unshiu_00158 | 310973 | 312504 | 1532  | 0.41  | 98.37 |
| scaffold01246 | 16813 | 20354 | 3542  | 10.83 | C_unshiu_00150 | 171917 | 175461 | 3545  | 0.92  | 99.46 |
| scaffold01246 | 21388 | 32133 | 10746 | 32.87 | C_unshiu_00150 | 177909 | 188641 | 10733 | 2.78  | 99.59 |
| scaffold01247 | 1     | 10170 | 10170 | 31.12 | C_unshiu_00484 | 74268  | 84444  | 10177 | 5.16  | 99.36 |
| scaffold01247 | 11077 | 17668 | 6592  | 20.17 | C_unshiu_00484 | 85733  | 92324  | 6592  | 3.34  | 99.95 |
| scaffold01247 | 18151 | 20016 | 1866  | 5.71  | C_unshiu_00389 | 78456  | 80321  | 1866  | 0.83  | 100   |
| scaffold01247 | 26048 | 28341 | 2294  | 7.02  | C_unshiu_00484 | 97806  | 100099 | 2294  | 1.16  | 99.74 |
| scaffold01247 | 28458 | 29690 | 1233  | 3.77  | C_unshiu_01262 | 36491  | 37723  | 1233  | 1.54  | 99.84 |
| scaffold01247 | 31001 | 32675 | 1675  | 5.13  | C_unshiu_01262 | 38578  | 40248  | 1671  | 2.09  | 99.16 |
| scaffold01248 | 2917  | 5156  | 2240  | 6.86  | C_unshiu_01566 | 32214  | 34452  | 2239  | 3.77  | 98.08 |
| scaffold01248 | 13687 | 22530 | 8844  | 27.09 | C_unshiu_00573 | 40250  | 31403  | 8848  | 5.13  | 98.9  |
| scaffold01248 | 24546 | 32648 | 8103  | 24.82 | C_unshiu_00573 | 30695  | 22597  | 8099  | 4.69  | 99.46 |
| scaffold01249 | 1     | 9530  | 9530  | 29.23 | C_unshiu_00138 | 304363 | 313892 | 9530  | 2.36  | 99.98 |
| scaffold01249 | 28756 | 30579 | 1824  | 5.59  | C_unshiu_00750 | 44117  | 45940  | 1824  | 1.34  | 100   |
| scaffold01250 | 8222  | 23363 | 15142 | 46.49 | C_unshiu_00593 | 9374   | 24514  | 15141 | 8.97  | 99.72 |
| scaffold01250 | 23418 | 26725 | 3308  | 10.16 | C_unshiu_00593 | 24428  | 27735  | 3308  | 1.96  | 100   |
| scaffold01251 | 6469  | 19989 | 13521 | 41.57 | C_unshiu_01492 | 17851  | 4332   | 13520 | 21.23 | 99.87 |
| scaffold01251 | 19983 | 21068 | 1086  | 3.34  | C_unshiu_01426 | 56172  | 55087  | 1086  | 1.58  | 100   |
| scaffold01251 | 21573 | 23993 | 2421  | 7.44  | C_unshiu_01100 | 22937  | 25357  | 2421  | 2.52  | 100   |
| scaffold01251 | 24702 | 31338 | 6637  | 20.4  | C_unshiu_01100 | 26557  | 33151  | 6595  | 6.87  | 99.02 |
| scaffold01252 | 1958  | 4247  | 2290  | 7.04  | C_unshiu_00188 | 174289 | 176578 | 2290  | 0.66  | 100   |
| scaffold01252 | 6802  | 19662 | 12861 | 39.55 | C_unshiu_00810 | 84783  | 97643  | 12861 | 10.1  | 99.88 |
| scaffold01252 | 21853 | 29856 | 8004  | 24.62 | C_unshiu_00810 | 100462 | 108456 | 7995  | 6.28  | 99.2  |
| scaffold01253 | 1     | 7308  | 7308  | 22.51 | C_unshiu_00199 | 112687 | 105355 | 7333  | 2.18  | 99.2  |
| scaffold01253 | 7669  | 9372  | 1704  | 5.25  | C_unshiu_00199 | 105097 | 103394 | 1704  | 0.51  | 99.65 |
| scaffold01253 | 16248 | 17676 | 1429  | 4.4   | C_unshiu_01024 | 63989  | 65398  | 1410  | 1.36  | 98.11 |
| scaffold01253 | 25964 | 32466 | 6503  | 20.03 | C_unshiu_00467 | 117951 | 124451 | 6501  | 3.21  | 99.85 |
| scaffold01254 | 1     | 32441 | 32441 | 100   | C_unshiu_00120 | 397823 | 365356 | 32468 | 7.69  | 99.92 |
| scaffold01255 | 789   | 31732 | 30944 | 95.49 | C_unshiu_02014 | 34154  | 3443   | 30712 | 76.5  | 98.58 |
| scaffold01256 | 5281  | 8548  | 3268  | 10.11 | C_unshiu_00289 | 19371  | 16102  | 3270  | 1.21  | 99.66 |
| scaffold01256 | 26649 | 27789 | 1141  | 3.53  | C_unshiu_01334 | 72396  | 71258  | 1139  | 1.52  | 99.48 |
| scaffold01256 | 29868 | 32340 | 2473  | 7.65  | C_unshiu_01334 | 69091  | 66617  | 2475  | 3.3   | 99.39 |
| scaffold01257 | 1     | 32059 | 32059 | 99.66 | C_unshiu_00310 | 254950 | 222858 | 32093 | 12.32 | 99.24 |
| scaffold01257 | 29680 | 32167 | 2488  | 7.73  | C_unshiu_00310 | 219408 | 216922 | 2487  | 0.96  | 98.76 |
| scaffold01259 | 1080  | 32121 | 31042 | 96.64 | C_unshiu_00937 | 42190  | 73228  | 31039 | 27.47 | 99.78 |
| scaffold01260 | 1     | 1033  | 1033  | 3.22  | C_unshiu_00517 | 181630 | 182662 | 1033  | 0.56  | 100   |
| scaffold01260 | 1700  | 3660  | 1961  | 6.11  | C_unshiu_00517 | 184108 | 186098 | 1991  | 1.07  | 98.49 |
| scaffold01260 | 3052  | 5797  | 2746  | 8.56  | C_unshiu_02159 | 5950   | 8699   | 2750  | 7.93  | 98.51 |
| scaffold01260 | 11396 | 12750 | 1355  | 4.23  | C_unshiu_00459 | 159090 | 157735 | 1356  | 0.66  | 99.34 |
| scaffold01260 | 13374 | 19721 | 6348  | 19.79 | C_unshiu_00459 | 156814 | 150488 | 6327  | 3.08  | 98.31 |
| scaffold01260 | 24360 | 27194 | 2835  | 8.84  | C_unshiu_02159 | 18000  | 15157  | 2844  | 8.21  | 99.3  |
| scaffold01261 | 1     | 2196  | 2196  | 6.84  | C_unshiu_00227 | 139858 | 142043 | 2186  | 0.71  | 99.04 |
| scaffold01261 | 5256  | 6620  | 1365  | 4.25  | C_unshiu_00286 | 198690 | 200042 | 1353  | 0.49  | 98.17 |
| scaffold01261 | 13168 | 15891 | 2724  | 8.49  | C_unshiu_01621 | 53595  | 50870  | 2726  | 4.82  | 99.93 |
| scaffold01262 | 20811 | 31804 | 10994 | 34.31 | C_unshiu_00566 | 49133  | 38145  | 10989 | 6.28  | 99.75 |
| scaffold01263 | 1068  | 2078  | 1011  | 3.16  | C_unshiu_00482 | 119023 | 118011 | 1013  | 0.51  | 99.7  |
| scaffold01263 | 8236  | 9552  | 1317  | 4.12  | C_unshiu_02488 | 17838  | 16522  | 1317  | 5.3   | 100   |
| scaffold01263 | 10684 | 16518 | 5835  | 18.25 | C_unshiu_02488 | 14169  | 8335   | 5835  | 23.49 | 100   |
| scaffold01263 | 16559 | 19595 | 3037  | 9.5   | C_unshiu_00956 | 21710  | 18674  | 3037  | 2.73  | 99.97 |

|               |       |       |       |       |                |        |        |       |       |       |
|---------------|-------|-------|-------|-------|----------------|--------|--------|-------|-------|-------|
| scaffold01263 | 20285 | 22158 | 1874  | 5.86  | C_unshiu_02488 | 7076   | 5203   | 1874  | 7.54  | 100   |
| scaffold01263 | 26168 | 27445 | 1278  | 4     | C_unshiu_00956 | 11692  | 10415  | 1278  | 1.15  | 99.92 |
| scaffold01263 | 28978 | 30604 | 1627  | 5.09  | C_unshiu_01010 | 24561  | 22935  | 1627  | 1.55  | 100   |
| scaffold01263 | 30601 | 31967 | 1367  | 4.28  | C_unshiu_00956 | 8921   | 7555   | 1367  | 1.23  | 100   |
| scaffold01264 | 3329  | 8695  | 5367  | 16.84 | C_unshiu_00231 | 149877 | 144509 | 5369  | 1.75  | 99.78 |
| scaffold01264 | 11121 | 13535 | 2415  | 7.58  | C_unshiu_00231 | 143349 | 140938 | 2412  | 0.79  | 99.13 |
| scaffold01264 | 15788 | 22232 | 6445  | 20.23 | C_unshiu_00231 | 138211 | 131759 | 6453  | 2.1   | 99.74 |
| scaffold01264 | 29551 | 30629 | 1079  | 3.39  | C_unshiu_01031 | 23256  | 24334  | 1079  | 1.05  | 98.98 |
| scaffold01265 | 7091  | 8690  | 1600  | 5.04  | C_unshiu_00809 | 27049  | 25450  | 1600  | 1.26  | 100   |
| scaffold01266 | 3414  | 10247 | 6834  | 21.55 | C_unshiu_00980 | 48173  | 55062  | 6890  | 6.34  | 98.93 |
| scaffold01266 | 23224 | 31719 | 8496  | 26.79 | C_unshiu_00980 | 66219  | 74707  | 8489  | 7.81  | 99.88 |
| scaffold01267 | 1     | 28023 | 28023 | 88.51 | C_unshiu_00087 | 468300 | 440289 | 28012 | 5.95  | 99.93 |
| scaffold01267 | 30456 | 31660 | 1205  | 3.81  | C_unshiu_00087 | 437636 | 436435 | 1202  | 0.26  | 98.68 |
| scaffold01268 | 1     | 9115  | 9115  | 28.81 | C_unshiu_00936 | 9136   | 1      | 9136  | 8.08  | 99.38 |
| scaffold01269 | 1     | 2099  | 2099  | 6.65  | C_unshiu_02194 | 7873   | 9972   | 2100  | 6.29  | 99.95 |
| scaffold01269 | 2100  | 5079  | 2980  | 9.44  | C_unshiu_00610 | 66202  | 69181  | 2980  | 1.81  | 99.97 |
| scaffold01269 | 5078  | 7692  | 2615  | 8.28  | C_unshiu_00612 | 89933  | 92547  | 2615  | 1.59  | 99.92 |
| scaffold01269 | 16114 | 17178 | 1065  | 3.37  | C_unshiu_00610 | 79156  | 80221  | 1066  | 0.65  | 99.53 |
| scaffold01269 | 17166 | 18324 | 1159  | 3.67  | C_unshiu_02194 | 21257  | 22415  | 1159  | 3.47  | 99.65 |
| scaffold01269 | 18795 | 20494 | 1700  | 5.38  | C_unshiu_00612 | 102822 | 104521 | 1700  | 1.03  | 99.88 |
| scaffold01269 | 21071 | 22469 | 1399  | 4.43  | C_unshiu_00612 | 105124 | 106522 | 1399  | 0.85  | 100   |
| scaffold01269 | 22474 | 26017 | 3544  | 11.22 | C_unshiu_00793 | 4900   | 1324   | 3577  | 2.77  | 98.13 |
| scaffold01270 | 788   | 2807  | 2020  | 6.44  | C_unshiu_00040 | 597722 | 599739 | 2018  | 0.31  | 99.75 |
| scaffold01270 | 15830 | 29912 | 14083 | 44.88 | C_unshiu_02877 | 14095  | 13     | 14083 | 86.31 | 98.99 |
| scaffold01271 | 355   | 1386  | 1032  | 3.3   | C_unshiu_02948 | 12725  | 13759  | 1035  | 7.09  | 98.65 |
| scaffold01271 | 8301  | 10614 | 2314  | 7.4   | C_unshiu_00499 | 156863 | 154550 | 2314  | 1.21  | 100   |
| scaffold01271 | 10615 | 12741 | 2127  | 6.8   | C_unshiu_01487 | 18760  | 20891  | 2132  | 3.33  | 98.92 |
| scaffold01271 | 24124 | 25716 | 1593  | 5.1   | C_unshiu_01487 | 32173  | 33758  | 1586  | 2.48  | 98.31 |
| scaffold01272 | 1     | 17963 | 17963 | 57.5  | C_unshiu_00355 | 83544  | 65643  | 17902 | 7.53  | 98.35 |
| scaffold01272 | 14357 | 31242 | 16886 | 54.05 | C_unshiu_00355 | 101354 | 84478  | 16877 | 7.1   | 99.73 |
| scaffold01273 | 1064  | 2195  | 1132  | 3.63  | C_unshiu_00034 | 298023 | 299165 | 1143  | 0.16  | 98.43 |
| scaffold01273 | 11976 | 14870 | 2895  | 9.28  | C_unshiu_01260 | 77182  | 80085  | 2904  | 3.63  | 98.86 |
| scaffold01273 | 22602 | 23862 | 1261  | 4.04  | C_unshiu_00034 | 270006 | 271264 | 1259  | 0.18  | 99.6  |
| scaffold01273 | 29274 | 31194 | 1921  | 6.16  | C_unshiu_02528 | 10602  | 8680   | 1923  | 8.04  | 99.27 |
| scaffold01274 | 24139 | 25909 | 1771  | 5.69  | C_unshiu_00423 | 208329 | 210099 | 1771  | 0.81  | 100   |
| scaffold01275 | 9363  | 14645 | 5283  | 16.98 | C_unshiu_00270 | 73337  | 78619  | 5283  | 1.88  | 99.94 |
| scaffold01275 | 20091 | 21789 | 1699  | 5.46  | C_unshiu_02704 | 7509   | 9209   | 1701  | 8.6   | 99.76 |
| scaffold01275 | 24391 | 27460 | 3070  | 9.87  | C_unshiu_02704 | 10697  | 13774  | 3078  | 15.56 | 98.02 |
| scaffold01275 | 29826 | 31110 | 1285  | 4.13  | C_unshiu_00648 | 141576 | 140292 | 1285  | 0.82  | 100   |
| scaffold01276 | 3294  | 5752  | 2459  | 7.95  | C_unshiu_01132 | 3115   | 5565   | 2451  | 2.65  | 98.78 |
| scaffold01276 | 7287  | 20628 | 13342 | 43.11 | C_unshiu_00831 | 55786  | 42388  | 13399 | 10.73 | 99.03 |
| scaffold01277 | 13390 | 14637 | 1248  | 4.04  | C_unshiu_02452 | 10045  | 11317  | 1273  | 4.87  | 98.04 |
| scaffold01277 | 13390 | 14637 | 1248  | 4.04  | C_unshiu_02518 | 4021   | 5292   | 1272  | 5.27  | 98.11 |
| scaffold01277 | 17020 | 18604 | 1585  | 5.12  | C_unshiu_02452 | 14661  | 16246  | 1586  | 6.07  | 99.87 |
| scaffold01277 | 19329 | 21222 | 1894  | 6.12  | C_unshiu_01410 | 69708  | 67815  | 1894  | 2.7   | 100   |
| scaffold01277 | 22893 | 24938 | 2046  | 6.62  | C_unshiu_02452 | 23001  | 20963  | 2039  | 7.8   | 99.27 |
| scaffold01277 | 26836 | 30928 | 4093  | 13.23 | C_unshiu_01410 | 63073  | 58984  | 4090  | 5.84  | 99.41 |
| scaffold01278 | 12625 | 15484 | 2860  | 9.29  | C_unshiu_00195 | 166452 | 169311 | 2860  | 0.84  | 100   |
| scaffold01278 | 16501 | 20376 | 3876  | 12.59 | C_unshiu_00195 | 170606 | 174482 | 3877  | 1.14  | 99.36 |
| scaffold01278 | 20360 | 21779 | 1420  | 4.61  | C_unshiu_00195 | 174505 | 175924 | 1420  | 0.42  | 100   |
| scaffold01278 | 21932 | 25388 | 3457  | 11.23 | C_unshiu_00458 | 162896 | 166352 | 3457  | 1.68  | 100   |
| scaffold01278 | 25384 | 30790 | 5407  | 17.56 | C_unshiu_00195 | 186110 | 191516 | 5407  | 1.59  | 100   |
| scaffold01279 | 1     | 1073  | 1073  | 3.49  | C_unshiu_01096 | 60271  | 61346  | 1076  | 1.12  | 98.79 |
| scaffold01279 | 11974 | 24952 | 12979 | 42.2  | C_unshiu_01096 | 73427  | 86404  | 12978 | 13.47 | 98.2  |
| scaffold01279 | 26718 | 30755 | 4038  | 13.13 | C_unshiu_01096 | 88503  | 92540  | 4038  | 4.19  | 100   |
| scaffold01280 | 9955  | 12919 | 2965  | 9.67  | C_unshiu_02061 | 37128  | 34195  | 2934  | 7.67  | 98.62 |
| scaffold01280 | 19907 | 23814 | 3908  | 12.75 | C_unshiu_02311 | 14585  | 10679  | 3907  | 13.21 | 99.18 |
| scaffold01280 | 28918 | 30028 | 1111  | 3.62  | C_unshiu_02311 | 4535   | 3425   | 1111  | 3.76  | 100   |
| scaffold01281 | 24575 | 27898 | 3324  | 10.84 | C_unshiu_02277 | 29256  | 25933  | 3324  | 10.9  | 100   |
| scaffold01281 | 28900 | 30661 | 1762  | 5.75  | C_unshiu_02277 | 24577  | 22816  | 1762  | 5.78  | 100   |
| scaffold01282 | 6222  | 7866  | 1645  | 5.38  | C_unshiu_00661 | 124071 | 122427 | 1645  | 1.07  | 100   |
| scaffold01283 | 12128 | 16263 | 4136  | 13.53 | C_unshiu_00016 | 224680 | 228804 | 4125  | 0.47  | 99.66 |
| scaffold01283 | 17462 | 23708 | 6247  | 20.44 | C_unshiu_00016 | 231715 | 237959 | 6245  | 0.72  | 99.57 |
| scaffold01283 | 23871 | 28132 | 4262  | 13.94 | C_unshiu_00016 | 238300 | 242561 | 4262  | 0.49  | 100   |
| scaffold01284 | 809   | 3018  | 2210  | 7.3   | C_unshiu_01507 | 11956  | 14160  | 2205  | 3.51  | 98.83 |
| scaffold01284 | 4812  | 15059 | 10248 | 33.84 | C_unshiu_01507 | 16300  | 26456  | 10157 | 16.18 | 98.97 |
| scaffold01284 | 28286 | 30255 | 1970  | 6.51  | C_unshiu_00431 | 160959 | 158991 | 1969  | 0.92  | 99.09 |
| scaffold01285 | 1     | 1089  | 1089  | 3.6   | C_unshiu_00416 | 208200 | 207107 | 1094  | 0.5   | 98.54 |
| scaffold01285 | 11868 | 16228 | 4361  | 14.42 | C_unshiu_00783 | 130607 | 126247 | 4361  | 3.34  | 99.66 |
| scaffold01285 | 17885 | 19440 | 1556  | 5.14  | C_unshiu_00783 | 123858 | 122294 | 1565  | 1.2   | 98.85 |
| scaffold01286 | 5176  | 18041 | 12866 | 42.54 | C_unshiu_00558 | 172267 | 159402 | 12866 | 7.31  | 99.9  |
| scaffold01286 | 18054 | 25067 | 7014  | 23.19 | C_unshiu_00558 | 159005 | 151993 | 7013  | 3.98  | 99.72 |
| scaffold01286 | 25665 | 26832 | 1168  | 3.86  | C_unshiu_00558 | 151434 | 150267 | 1168  | 0.66  | 100   |
| scaffold01286 | 26831 | 28134 | 1304  | 4.31  | C_unshiu_01400 | 32870  | 34173  | 1304  | 1.85  | 100   |
| scaffold01287 | 1     | 1926  | 1926  | 6.37  | C_unshiu_01235 | 16277  | 18206  | 1930  | 2.35  | 98.29 |
| scaffold01287 | 1926  | 4100  | 2175  | 7.2   | C_unshiu_01015 | 69373  | 67199  | 2175  | 2.08  | 100   |
| scaffold01287 | 7003  | 11333 | 4331  | 14.34 | C_unshiu_00988 | 23554  | 27884  | 4331  | 4.02  | 100   |
| scaffold01287 | 12099 | 23994 | 11896 | 39.38 | C_unshiu_00988 | 28833  | 40718  | 11886 | 11.03 | 99.54 |
| scaffold01287 | 24009 | 26231 | 2223  | 7.36  | C_unshiu_00988 | 40973  | 43195  | 2223  | 2.06  | 100   |

|               |       |       |       |       |                |        |        |       |       |       |
|---------------|-------|-------|-------|-------|----------------|--------|--------|-------|-------|-------|
| scaffold01288 | 4212  | 18200 | 13989 | 46.38 | C_unshiu_01513 | 38440  | 52440  | 14001 | 22.41 | 99.18 |
| scaffold01288 | 24821 | 27895 | 3075  | 10.19 | C_unshiu_00387 | 106077 | 103003 | 3075  | 1.36  | 99.71 |
| scaffold01289 | 1838  | 4079  | 2242  | 7.43  | C_unshiu_01027 | 24673  | 22421  | 2253  | 2.18  | 99.02 |
| scaffold01289 | 4078  | 5702  | 1625  | 5.38  | C_unshiu_01454 | 38290  | 36669  | 1622  | 2.45  | 98.4  |
| scaffold01289 | 7451  | 26294 | 18844 | 62.42 | C_unshiu_01454 | 34468  | 15629  | 18840 | 28.48 | 99.97 |
| scaffold01289 | 26187 | 29134 | 2948  | 9.77  | C_unshiu_01454 | 15630  | 12694  | 2937  | 4.44  | 99.12 |
| scaffold01289 | 29127 | 30187 | 1061  | 3.51  | C_unshiu_01454 | 11645  | 12700  | 1056  | 1.6   | 98.31 |
| scaffold01290 | 999   | 3508  | 2510  | 8.34  | C_unshiu_02592 | 17249  | 14743  | 2507  | 11.22 | 99.05 |
| scaffold01290 | 3533  | 6060  | 2528  | 8.4   | C_unshiu_02592 | 14971  | 12438  | 2534  | 11.34 | 99.25 |
| scaffold01290 | 6921  | 8497  | 1577  | 5.24  | C_unshiu_02592 | 11195  | 9619   | 1577  | 7.06  | 100   |
| scaffold01290 | 10196 | 12281 | 2086  | 6.93  | C_unshiu_02592 | 7445   | 5346   | 2100  | 9.4   | 99.1  |
| scaffold01290 | 12350 | 14434 | 2085  | 6.92  | C_unshiu_02592 | 4755   | 2671   | 2085  | 9.33  | 100   |
| scaffold01290 | 16464 | 30110 | 13647 | 45.32 | C_unshiu_00333 | 159072 | 145402 | 13671 | 5.44  | 98.65 |
| scaffold01291 | 1     | 1471  | 1471  | 4.89  | C_unshiu_02821 | 8607   | 10077  | 1471  | 8.41  | 99.52 |
| scaffold01291 | 3027  | 6167  | 3141  | 10.43 | C_unshiu_02821 | 7882   | 4749   | 3134  | 17.92 | 99.27 |
| scaffold01291 | 17333 | 19427 | 2095  | 6.96  | C_unshiu_01329 | 19887  | 21984  | 2098  | 2.79  | 99    |
| scaffold01291 | 23689 | 30105 | 6417  | 21.32 | C_unshiu_01329 | 26909  | 33362  | 6454  | 8.58  | 98.44 |
| scaffold01293 | 7661  | 8897  | 1237  | 4.11  | C_unshiu_01113 | 3590   | 4827   | 1238  | 1.31  | 99.92 |
| scaffold01293 | 8898  | 10468 | 1571  | 5.22  | C_unshiu_01113 | 4762   | 6332   | 1571  | 1.66  | 100   |
| scaffold01293 | 12167 | 28986 | 16820 | 55.92 | C_unshiu_01113 | 7596   | 24417  | 16822 | 17.78 | 99.82 |
| scaffold01294 | 5343  | 6654  | 1312  | 4.36  | C_unshiu_02626 | 20228  | 21539  | 1312  | 6.09  | 99.77 |
| scaffold01294 | 7415  | 8434  | 1020  | 3.39  | C_unshiu_01944 | 26886  | 27905  | 1020  | 2.37  | 98.04 |
| scaffold01294 | 9533  | 12504 | 2972  | 9.89  | C_unshiu_01944 | 23123  | 26088  | 2966  | 6.9   | 99.56 |
| scaffold01294 | 15341 | 17271 | 1931  | 6.42  | C_unshiu_01944 | 27556  | 29495  | 1940  | 4.52  | 98.25 |
| scaffold01295 | 287   | 9963  | 9677  | 32.19 | C_unshiu_01268 | 28364  | 18722  | 9643  | 12.12 | 99.25 |
| scaffold01295 | 10282 | 24212 | 13931 | 46.34 | C_unshiu_01268 | 18478  | 4544   | 13935 | 17.51 | 99.96 |
| scaffold01296 | 1     | 24036 | 24036 | 79.98 | C_unshiu_00004 | 31182  | 7133   | 24050 | 2.05  | 99.88 |
| scaffold01297 | 13709 | 23075 | 9367  | 31.24 | C_unshiu_02074 | 28303  | 37669  | 9367  | 24.87 | 99.72 |
| scaffold01297 | 23629 | 29552 | 5924  | 19.76 | C_unshiu_01625 | 1      | 5919   | 5919  | 10.52 | 99.7  |
| scaffold01298 | 14137 | 17191 | 3055  | 10.22 | C_unshiu_00092 | 408348 | 411443 | 3096  | 0.66  | 98.29 |
| scaffold01298 | 17186 | 20800 | 3615  | 12.09 | C_unshiu_00673 | 129018 | 125404 | 3615  | 2.4   | 100   |
| scaffold01298 | 21552 | 27363 | 5812  | 19.43 | C_unshiu_00092 | 414762 | 420582 | 5821  | 1.25  | 99.59 |
| scaffold01298 | 27356 | 29012 | 1657  | 5.54  | C_unshiu_00263 | 206902 | 208558 | 1657  | 0.58  | 100   |
| scaffold01299 | 18064 | 29855 | 11792 | 39.5  | C_unshiu_02982 | 13450  | 1676   | 11775 | 87.55 | 99.19 |
| scaffold01300 | 1283  | 2730  | 1448  | 4.87  | C_unshiu_01086 | 26947  | 25500  | 1448  | 1.49  | 99.79 |
| scaffold01300 | 4060  | 7795  | 3736  | 12.55 | C_unshiu_01848 | 39130  | 35398  | 3733  | 8.02  | 99.54 |
| scaffold01300 | 6905  | 8930  | 2026  | 6.81  | C_unshiu_01086 | 21383  | 19358  | 2026  | 2.08  | 99.85 |
| scaffold01300 | 10215 | 17398 | 7184  | 24.14 | C_unshiu_01086 | 17711  | 10528  | 7184  | 7.37  | 99.83 |
| scaffold01301 | 1     | 1093  | 1093  | 3.67  | C_unshiu_01130 | 89420  | 88328  | 1093  | 1.18  | 98.81 |
| scaffold01301 | 6155  | 17325 | 11171 | 37.54 | C_unshiu_01130 | 83141  | 71972  | 11170 | 12.06 | 99.99 |
| scaffold01301 | 17460 | 21987 | 4528  | 15.22 | C_unshiu_01130 | 71802  | 67281  | 4522  | 4.88  | 99.78 |
| scaffold01302 | 24203 | 28370 | 4168  | 14.03 | C_unshiu_00267 | 91032  | 95200  | 4169  | 1.48  | 99.98 |
| scaffold01303 | 19354 | 22135 | 2782  | 9.38  | C_unshiu_01724 | 1      | 2782   | 2782  | 5.37  | 100   |
| scaffold01303 | 25974 | 27067 | 1094  | 3.69  | C_unshiu_00565 | 127961 | 129054 | 1094  | 0.63  | 99.09 |
| scaffold01304 | 6950  | 8333  | 1384  | 4.67  | C_unshiu_03027 | 2913   | 4298   | 1386  | 11.4  | 99.86 |
| scaffold01304 | 9757  | 12043 | 2287  | 7.71  | C_unshiu_03027 | 6078   | 8364   | 2287  | 18.82 | 99.61 |
| scaffold01305 | 10717 | 14180 | 3464  | 11.69 | C_unshiu_00514 | 21905  | 18451  | 3455  | 1.85  | 98.21 |
| scaffold01306 | 5830  | 8163  | 2334  | 7.88  | C_unshiu_02325 | 9291   | 11628  | 2338  | 8.02  | 99.7  |
| scaffold01306 | 14395 | 19526 | 5132  | 17.32 | C_unshiu_02527 | 21454  | 16323  | 5132  | 21.45 | 99.94 |
| scaffold01306 | 25619 | 26638 | 1020  | 3.44  | C_unshiu_02527 | 9748   | 8728   | 1021  | 4.27  | 99.71 |
| scaffold01307 | 2693  | 4291  | 1599  | 5.4   | C_unshiu_00750 | 1635   | 39     | 1597  | 1.17  | 99.75 |
| scaffold01307 | 23814 | 25455 | 1642  | 5.55  | C_unshiu_00750 | 3372   | 1731   | 1642  | 1.2   | 99.63 |
| scaffold01308 | 17723 | 21568 | 3846  | 12.99 | C_unshiu_01895 | 2844   | 6690   | 3847  | 8.56  | 99.09 |
| scaffold01308 | 26361 | 28750 | 2390  | 8.07  | C_unshiu_00499 | 154954 | 152565 | 2390  | 1.25  | 100   |
| scaffold01309 | 15891 | 18651 | 2761  | 9.33  | C_unshiu_00936 | 25114  | 22345  | 2770  | 2.45  | 99.31 |
| scaffold01310 | 1     | 1180  | 1180  | 4.02  | C_unshiu_00945 | 61432  | 62612  | 1181  | 1.06  | 98.99 |
| scaffold01310 | 7648  | 9541  | 1894  | 6.45  | C_unshiu_00945 | 69475  | 71369  | 1895  | 1.69  | 99.31 |
| scaffold01310 | 13634 | 15275 | 1642  | 5.59  | C_unshiu_00594 | 60348  | 61989  | 1642  | 0.97  | 98.84 |
| scaffold01311 | 1     | 3766  | 3766  | 12.82 | C_unshiu_00422 | 172281 | 168501 | 3781  | 1.73  | 99.21 |
| scaffold01312 | 17106 | 18927 | 1822  | 6.21  | C_unshiu_01909 | 22182  | 20361  | 1822  | 4.12  | 99.95 |
| scaffold01312 | 20340 | 29336 | 8997  | 30.67 | C_unshiu_01909 | 18479  | 9490   | 8990  | 20.31 | 99.92 |
| scaffold01313 | 1     | 4748  | 4748  | 16.21 | C_unshiu_00689 | 29225  | 24527  | 4699  | 3.21  | 98.63 |
| scaffold01313 | 4525  | 10567 | 6043  | 20.63 | C_unshiu_00689 | 24647  | 18608  | 6040  | 4.12  | 99.52 |
| scaffold01314 | 5198  | 7931  | 2734  | 9.34  | C_unshiu_01760 | 2432   | 5158   | 2727  | 5.46  | 98.61 |
| scaffold01314 | 21316 | 22376 | 1061  | 3.62  | C_unshiu_00285 | 1      | 1070   | 1070  | 0.39  | 98.04 |
| scaffold01314 | 25081 | 26490 | 1410  | 4.82  | C_unshiu_00285 | 3625   | 5033   | 1409  | 0.51  | 99.86 |
| scaffold01315 | 13235 | 17649 | 4415  | 15.12 | C_unshiu_03099 | 1      | 4395   | 4395  | 46.54 | 98.96 |
| scaffold01315 | 18972 | 22301 | 3330  | 11.41 | C_unshiu_03099 | 6115   | 9443   | 3329  | 35.25 | 99.73 |
| scaffold01315 | 23976 | 25135 | 1160  | 3.97  | C_unshiu_02057 | 5147   | 3988   | 1160  | 3.02  | 98.36 |
| scaffold01316 | 4675  | 6195  | 1521  | 5.22  | C_unshiu_02218 | 32439  | 30926  | 1514  | 4.63  | 98.69 |
| scaffold01316 | 6624  | 10025 | 3402  | 11.67 | C_unshiu_02218 | 30500  | 27119  | 3382  | 10.35 | 98.91 |
| scaffold01316 | 10026 | 14502 | 4477  | 15.36 | C_unshiu_00515 | 107973 | 112489 | 4517  | 2.42  | 98.1  |
| scaffold01316 | 24988 | 26758 | 1771  | 6.08  | C_unshiu_00515 | 164066 | 165837 | 1772  | 0.95  | 99.21 |
| scaffold01316 | 26765 | 27785 | 1021  | 3.5   | C_unshiu_00515 | 169235 | 170257 | 1023  | 0.55  | 98.83 |
| scaffold01317 | 2415  | 10207 | 7793  | 26.73 | C_unshiu_00753 | 86038  | 93812  | 7775  | 5.73  | 99.59 |
| scaffold01317 | 13008 | 28081 | 15074 | 51.7  | C_unshiu_00753 | 95927  | 111000 | 15074 | 11.12 | 99.99 |
| scaffold01318 | 3600  | 5367  | 1768  | 6.06  | C_unshiu_00903 | 114622 | 112855 | 1768  | 1.52  | 99.94 |
| scaffold01318 | 5367  | 6443  | 1077  | 3.69  | C_unshiu_00903 | 112920 | 111842 | 1079  | 0.93  | 99.81 |
| scaffold01319 | 3044  | 4577  | 1534  | 5.27  | C_unshiu_00424 | 151064 | 152591 | 1528  | 0.7   | 99.48 |

|               |       |       |       |       |                |        |        |       |       |       |
|---------------|-------|-------|-------|-------|----------------|--------|--------|-------|-------|-------|
| scaffold01319 | 10079 | 26325 | 16247 | 55.79 | C_unshiu_00424 | 157446 | 173693 | 16248 | 7.48  | 99.98 |
| scaffold01321 | 156   | 4778  | 4623  | 15.92 | C_unshiu_02270 | 28616  | 23994  | 4623  | 14.98 | 100   |
| scaffold01321 | 5392  | 23150 | 17759 | 61.16 | C_unshiu_02270 | 22999  | 5240   | 17760 | 57.56 | 99.97 |
| scaffold01322 | 1     | 8982  | 8982  | 30.96 | C_unshiu_00339 | 225658 | 234641 | 8984  | 3.6   | 99.61 |
| scaffold01322 | 9084  | 10536 | 1453  | 5.01  | C_unshiu_00339 | 234881 | 236333 | 1453  | 0.58  | 99.93 |
| scaffold01322 | 14893 | 23392 | 8500  | 29.3  | C_unshiu_00339 | 240200 | 248699 | 8500  | 3.4   | 99.95 |
| scaffold01322 | 26397 | 28892 | 2496  | 8.6   | C_unshiu_00436 | 210953 | 208453 | 2501  | 1.17  | 99    |
| scaffold01323 | 1     | 9585  | 9585  | 33.07 | C_unshiu_01818 | 29620  | 39204  | 9585  | 20.03 | 100   |
| scaffold01323 | 11585 | 14000 | 2416  | 8.33  | C_unshiu_01818 | 42086  | 44501  | 2416  | 5.05  | 99.3  |
| scaffold01323 | 15049 | 26760 | 11712 | 40.4  | C_unshiu_01599 | 19099  | 30813  | 11715 | 20.38 | 99.8  |
| scaffold01324 | 9705  | 10711 | 1007  | 3.49  | C_unshiu_01066 | 5256   | 4250   | 1007  | 1.02  | 100   |
| scaffold01324 | 11870 | 14469 | 2600  | 9     | C_unshiu_01066 | 18749  | 16149  | 2601  | 2.63  | 99.92 |
| scaffold01324 | 18910 | 20827 | 1918  | 6.64  | C_unshiu_00019 | 51078  | 52995  | 1918  | 0.23  | 100   |
| scaffold01326 | 8416  | 10334 | 1919  | 6.69  | C_unshiu_01162 | 19034  | 17089  | 1946  | 2.17  | 98.61 |
| scaffold01326 | 11477 | 13788 | 2312  | 8.06  | C_unshiu_01162 | 16784  | 14475  | 2310  | 2.58  | 99.57 |
| scaffold01326 | 14278 | 15829 | 1552  | 5.41  | C_unshiu_01162 | 13722  | 12171  | 1552  | 1.73  | 98.84 |
| scaffold01326 | 20809 | 22327 | 1519  | 5.29  | C_unshiu_01162 | 7756   | 6239   | 1518  | 1.69  | 99.93 |
| scaffold01327 | 9203  | 18200 | 8998  | 31.37 | C_unshiu_01760 | 10446  | 19363  | 8918  | 17.85 | 98.16 |
| scaffold01327 | 19903 | 23673 | 3771  | 13.15 | C_unshiu_00256 | 6060   | 9845   | 3786  | 1.3   | 98.92 |
| scaffold01327 | 27009 | 28682 | 1674  | 5.84  | C_unshiu_00256 | 13294  | 14966  | 1673  | 0.58  | 99.58 |
| scaffold01328 | 3144  | 6498  | 3355  | 11.71 | C_unshiu_02341 | 3297   | 6651   | 3355  | 11.74 | 99.94 |
| scaffold01328 | 20816 | 24383 | 3568  | 12.45 | C_unshiu_01617 | 1      | 3560   | 3560  | 6.28  | 98.74 |
| scaffold01328 | 25613 | 28656 | 3044  | 10.62 | C_unshiu_01617 | 4937   | 7980   | 3044  | 5.37  | 100   |
| scaffold01329 | 844   | 2098  | 1255  | 4.38  | C_unshiu_01946 | 41637  | 42887  | 1251  | 2.91  | 99.36 |
| scaffold01329 | 2443  | 3981  | 1539  | 5.38  | C_unshiu_01946 | 37387  | 38924  | 1538  | 3.58  | 98.38 |
| scaffold01329 | 10486 | 11808 | 1323  | 4.62  | C_unshiu_01946 | 40180  | 38858  | 1323  | 3.08  | 99.17 |
| scaffold01329 | 11832 | 20436 | 8605  | 30.06 | C_unshiu_01946 | 38153  | 29546  | 8608  | 20.05 | 99.36 |
| scaffold01329 | 20431 | 22940 | 2510  | 8.77  | C_unshiu_02122 | 16407  | 13898  | 2510  | 7     | 100   |
| scaffold01329 | 23463 | 24823 | 1361  | 4.75  | C_unshiu_00444 | 121658 | 123023 | 1366  | 0.65  | 99.12 |
| scaffold01329 | 27238 | 28627 | 1390  | 4.86  | C_unshiu_00444 | 124376 | 125766 | 1391  | 0.67  | 99.71 |
| scaffold01330 | 10861 | 22112 | 11252 | 39.31 | C_unshiu_00480 | 116715 | 127974 | 11260 | 5.69  | 99.91 |
| scaffold01330 | 22953 | 27694 | 4742  | 16.57 | C_unshiu_00480 | 129283 | 134061 | 4779  | 2.41  | 98.24 |
| scaffold01331 | 1291  | 10504 | 9214  | 32.2  | C_unshiu_00444 | 106111 | 96953  | 9159  | 4.38  | 98.03 |
| scaffold01331 | 10536 | 14624 | 4089  | 14.29 | C_unshiu_00444 | 96683  | 92593  | 4091  | 1.96  | 99.71 |
| scaffold01331 | 15595 | 18253 | 2659  | 9.29  | C_unshiu_00444 | 91019  | 88360  | 2660  | 1.27  | 99.47 |
| scaffold01331 | 18319 | 19410 | 1092  | 3.82  | C_unshiu_00444 | 88250  | 87159  | 1092  | 0.52  | 99.45 |
| scaffold01331 | 23441 | 25201 | 1761  | 6.15  | C_unshiu_00444 | 84041  | 82280  | 1762  | 0.84  | 99.49 |
| scaffold01331 | 25290 | 26591 | 1302  | 4.55  | C_unshiu_00444 | 82156  | 80842  | 1315  | 0.63  | 98.71 |
| scaffold01332 | 1     | 1070  | 1070  | 3.74  | C_unshiu_03080 | 155    | 1224   | 1070  | 10.71 | 100   |
| scaffold01332 | 1432  | 9757  | 8326  | 29.12 | C_unshiu_03080 | 1667   | 9991   | 8325  | 83.32 | 98.9  |
| scaffold01332 | 11962 | 15282 | 3321  | 11.62 | C_unshiu_02368 | 24065  | 27395  | 3331  | 11.94 | 99.28 |
| scaffold01333 | 10586 | 11740 | 1155  | 4.04  | C_unshiu_01256 | 29019  | 30172  | 1154  | 1.43  | 99.65 |
| scaffold01333 | 13680 | 15061 | 1382  | 4.84  | C_unshiu_01256 | 31281  | 32662  | 1382  | 1.72  | 99.93 |
| scaffold01333 | 15835 | 17688 | 1854  | 6.49  | C_unshiu_01256 | 33619  | 35469  | 1851  | 2.3   | 99.78 |
| scaffold01333 | 27050 | 28565 | 1516  | 5.31  | C_unshiu_01256 | 44286  | 45787  | 1502  | 1.87  | 98.42 |
| scaffold01334 | 19545 | 25833 | 6289  | 22.05 | C_unshiu_01146 | 65501  | 71752  | 6252  | 6.86  | 99.28 |
| scaffold01335 | 1     | 18920 | 18920 | 66.7  | C_unshiu_02082 | 29038  | 10120  | 18919 | 50.76 | 99.39 |
| scaffold01335 | 19499 | 21925 | 2427  | 8.56  | C_unshiu_00650 | 3587   | 6022   | 2436  | 1.56  | 99.1  |
| scaffold01335 | 21919 | 23690 | 1772  | 6.25  | C_unshiu_02042 | 16273  | 18044  | 1772  | 4.54  | 100   |
| scaffold01335 | 23750 | 26479 | 2730  | 9.62  | C_unshiu_01041 | 82130  | 84881  | 2752  | 2.7   | 98.73 |
| scaffold01336 | 23549 | 28356 | 4808  | 16.96 | C_unshiu_00923 | 25996  | 21177  | 4820  | 4.21  | 99.09 |
| scaffold01337 | 1     | 9470  | 9470  | 33.44 | C_unshiu_02996 | 694    | 10079  | 9386  | 72.08 | 98.46 |
| scaffold01337 | 6541  | 9487  | 2947  | 10.4  | C_unshiu_02996 | 13021  | 10075  | 2947  | 22.63 | 100   |
| scaffold01337 | 19553 | 28323 | 8771  | 30.97 | C_unshiu_00113 | 434538 | 425768 | 8771  | 2.02  | 100   |
| scaffold01338 | 16    | 18995 | 18980 | 67.12 | C_unshiu_01386 | 29883  | 10901  | 18983 | 26.65 | 99.93 |
| scaffold01338 | 19053 | 24936 | 5884  | 20.81 | C_unshiu_01386 | 10777  | 4894   | 5884  | 8.26  | 100   |
| scaffold01338 | 25548 | 28279 | 2732  | 9.66  | C_unshiu_01386 | 3958   | 1228   | 2731  | 3.83  | 99.93 |
| scaffold01339 | 6448  | 9076  | 2629  | 9.3   | C_unshiu_00223 | 241130 | 238502 | 2629  | 0.84  | 100   |
| scaffold01339 | 17780 | 19106 | 1327  | 4.7   | C_unshiu_00523 | 14939  | 13606  | 1334  | 0.72  | 98.43 |
| scaffold01339 | 25835 | 27567 | 1733  | 6.13  | C_unshiu_00523 | 4286   | 2543   | 1744  | 0.94  | 98.05 |
| scaffold01341 | 4112  | 27402 | 23291 | 82.7  | C_unshiu_01591 | 29325  | 6070   | 23256 | 39.97 | 99.34 |
| scaffold01342 | 1     | 5541  | 5541  | 19.69 | C_unshiu_00358 | 231485 | 237025 | 5541  | 2.34  | 100   |
| scaffold01342 | 13850 | 28145 | 14296 | 50.79 | C_unshiu_00358 | 213075 | 198837 | 14239 | 6.01  | 99.5  |
| scaffold01343 | 3788  | 14944 | 11157 | 39.7  | C_unshiu_02555 | 4213   | 15310  | 11098 | 48.02 | 98.72 |
| scaffold01343 | 16964 | 18102 | 1139  | 4.05  | C_unshiu_02085 | 19610  | 20750  | 1141  | 3.07  | 98.69 |
| scaffold01343 | 16964 | 18102 | 1139  | 4.05  | C_unshiu_02555 | 17732  | 18871  | 1140  | 4.93  | 99.3  |
| scaffold01343 | 20456 | 25446 | 4991  | 17.76 | C_unshiu_02085 | 21902  | 26893  | 4992  | 13.44 | 99.86 |
| scaffold01344 | 2448  | 4893  | 2446  | 8.72  | C_unshiu_00637 | 10610  | 8165   | 2446  | 1.53  | 100   |
| scaffold01344 | 5907  | 12475 | 6569  | 23.43 | C_unshiu_00637 | 6567   | 1      | 6567  | 4.11  | 99.97 |
| scaffold01344 | 24767 | 28035 | 3269  | 11.66 | C_unshiu_02310 | 6021   | 9289   | 3269  | 11.05 | 98.11 |
| scaffold01345 | 1997  | 4351  | 2355  | 8.41  | C_unshiu_01270 | 2356   | 1      | 2356  | 2.96  | 99.66 |
| scaffold01345 | 9985  | 14963 | 4979  | 17.78 | C_unshiu_00484 | 136712 | 141698 | 4987  | 2.53  | 99.82 |
| scaffold01345 | 16224 | 17866 | 1643  | 5.87  | C_unshiu_00484 | 143401 | 145043 | 1643  | 0.83  | 99.82 |
| scaffold01346 | 11255 | 14249 | 2995  | 10.7  | C_unshiu_01292 | 1      | 2959   | 2959  | 3.79  | 98.33 |
| scaffold01347 | 1     | 3221  | 3221  | 11.51 | C_unshiu_01795 | 33839  | 30619  | 3221  | 6.63  | 99.97 |
| scaffold01347 | 3211  | 6306  | 3096  | 11.07 | C_unshiu_01944 | 23103  | 20009  | 3095  | 7.2   | 99.97 |
| scaffold01347 | 7393  | 21414 | 14022 | 50.12 | C_unshiu_01795 | 27498  | 13503  | 13996 | 28.79 | 99.35 |
| scaffold01347 | 23096 | 25507 | 2412  | 8.62  | C_unshiu_01795 | 12649  | 10238  | 2412  | 4.96  | 100   |
| scaffold01347 | 26339 | 27976 | 1638  | 5.86  | C_unshiu_01795 | 9031   | 7394   | 1638  | 3.37  | 100   |

|               |       |       |       |       |                |        |        |       |       |       |
|---------------|-------|-------|-------|-------|----------------|--------|--------|-------|-------|-------|
| scaffold01348 | 1196  | 3423  | 2228  | 7.97  | C_unshiu_00995 | 98247  | 100474 | 2228  | 2.09  | 100   |
| scaffold01348 | 16378 | 17400 | 1023  | 3.66  | C_unshiu_00462 | 81493  | 82515  | 1023  | 0.5   | 98.14 |
| scaffold01349 | 22380 | 23985 | 1606  | 5.75  | C_unshiu_00835 | 81927  | 83533  | 1607  | 1.29  | 98.01 |
| scaffold01349 | 25039 | 26044 | 1006  | 3.6   | C_unshiu_02859 | 12533  | 11527  | 1007  | 6.08  | 99.8  |
| scaffold01349 | 26044 | 27246 | 1203  | 4.31  | C_unshiu_00835 | 86932  | 88142  | 1211  | 0.97  | 98.27 |
| scaffold01350 | 1     | 27894 | 27894 | 100   | C_unshiu_01808 | 41834  | 13940  | 27895 | 57.84 | 99.95 |
| scaffold01351 | 402   | 2267  | 1866  | 6.7   | C_unshiu_00095 | 1      | 1866   | 1866  | 0.4   | 100   |
| scaffold01351 | 3707  | 6392  | 2686  | 9.65  | C_unshiu_01972 | 3621   | 6307   | 2687  | 6.45  | 99.67 |
| scaffold01351 | 8687  | 18090 | 9404  | 33.77 | C_unshiu_01972 | 7169   | 16544  | 9376  | 22.51 | 99.48 |
| scaffold01351 | 20291 | 26397 | 6107  | 21.93 | C_unshiu_00555 | 115729 | 109623 | 6107  | 3.45  | 100   |
| scaffold01351 | 20294 | 27529 | 7236  | 25.98 | C_unshiu_00512 | 139877 | 147112 | 7236  | 3.86  | 100   |
| scaffold01352 | 3593  | 5915  | 2323  | 8.34  | C_unshiu_00144 | 269539 | 271861 | 2323  | 0.59  | 100   |
| scaffold01352 | 5916  | 16511 | 10596 | 38.06 | C_unshiu_00600 | 10583  | 1      | 10583 | 6.31  | 99.87 |
| scaffold01352 | 25117 | 27239 | 2123  | 7.63  | C_unshiu_00915 | 76017  | 73904  | 2114  | 1.83  | 98.36 |
| scaffold01353 | 2176  | 9355  | 7180  | 25.8  | C_unshiu_00309 | 7149   | 1      | 7149  | 2.74  | 99.33 |
| scaffold01354 | 22275 | 24119 | 1845  | 6.64  | C_unshiu_00534 | 150348 | 148499 | 1850  | 1.01  | 98.05 |
| scaffold01355 | 1     | 5706  | 5706  | 20.58 | C_unshiu_00208 | 316619 | 322324 | 5706  | 1.73  | 99.68 |
| scaffold01355 | 14007 | 15338 | 1332  | 4.8   | C_unshiu_01644 | 46931  | 45600  | 1332  | 2.4   | 99.55 |
| scaffold01355 | 16046 | 25913 | 9868  | 35.59 | C_unshiu_01644 | 44805  | 34967  | 9839  | 17.76 | 98.24 |
| scaffold01357 | 2580  | 3641  | 1062  | 3.84  | C_unshiu_00446 | 79783  | 78722  | 1062  | 0.51  | 100   |
| scaffold01357 | 3642  | 7396  | 3755  | 13.58 | C_unshiu_01437 | 3680   | 7438   | 3759  | 5.54  | 98.41 |
| scaffold01357 | 9606  | 16064 | 6459  | 23.36 | C_unshiu_01437 | 12418  | 18880  | 6463  | 9.53  | 98.92 |
| scaffold01357 | 17778 | 20373 | 2596  | 9.39  | C_unshiu_01437 | 20992  | 23587  | 2596  | 3.83  | 99.96 |
| scaffold01357 | 21626 | 27576 | 5951  | 21.52 | C_unshiu_02223 | 26135  | 32073  | 5939  | 18.27 | 99.4  |
| scaffold01358 | 1956  | 6665  | 4710  | 17.04 | C_unshiu_02477 | 1      | 4710   | 4710  | 18.59 | 100   |
| scaffold01358 | 9014  | 27642 | 18629 | 67.39 | C_unshiu_02477 | 5985   | 24613  | 18629 | 73.52 | 99.99 |
| scaffold01359 | 1     | 1868  | 1868  | 6.76  | C_unshiu_00059 | 20093  | 21969  | 1877  | 0.32  | 98.4  |
| scaffold01359 | 4047  | 6010  | 1964  | 7.11  | C_unshiu_00059 | 18795  | 20760  | 1966  | 0.33  | 98.63 |
| scaffold01359 | 21070 | 22081 | 1012  | 3.66  | C_unshiu_01690 | 45929  | 44918  | 1012  | 1.91  | 100   |
| scaffold01359 | 26415 | 27627 | 1213  | 4.39  | C_unshiu_00059 | 40246  | 41463  | 1218  | 0.21  | 99.18 |
| scaffold01360 | 3826  | 5374  | 1549  | 5.61  | C_unshiu_02861 | 15006  | 16543  | 1538  | 9.3   | 98.32 |
| scaffold01360 | 8051  | 9264  | 1214  | 4.4   | C_unshiu_01152 | 39341  | 38118  | 1224  | 1.35  | 98.69 |
| scaffold01360 | 22612 | 24228 | 1617  | 5.86  | C_unshiu_01152 | 28936  | 27317  | 1620  | 1.79  | 99.07 |
| scaffold01360 | 24223 | 26164 | 1942  | 7.04  | C_unshiu_00083 | 28697  | 30638  | 1942  | 0.41  | 100   |
| scaffold01361 | 1     | 2132  | 2132  | 7.73  | C_unshiu_02266 | 30514  | 28383  | 2132  | 6.89  | 99.06 |
| scaffold01361 | 2410  | 16413 | 14004 | 50.75 | C_unshiu_02266 | 27651  | 13648  | 14004 | 45.23 | 99.96 |
| scaffold01361 | 17465 | 20829 | 3365  | 12.2  | C_unshiu_02266 | 12357  | 8989   | 3369  | 10.88 | 99.88 |
| scaffold01362 | 6236  | 7651  | 1416  | 5.13  | C_unshiu_00487 | 18114  | 16693  | 1422  | 0.72  | 98.67 |
| scaffold01362 | 7652  | 8904  | 1253  | 4.54  | C_unshiu_01028 | 82607  | 83859  | 1253  | 1.21  | 100   |
| scaffold01362 | 11930 | 21569 | 9640  | 34.94 | C_unshiu_00487 | 11872  | 2238   | 9635  | 4.9   | 99.57 |
| scaffold01363 | 1894  | 10685 | 8792  | 31.96 | C_unshiu_00497 | 186742 | 177948 | 8795  | 4.57  | 99.6  |
| scaffold01363 | 12499 | 25677 | 13179 | 47.91 | C_unshiu_02219 | 1340   | 14477  | 13138 | 40.22 | 98.62 |
| scaffold01364 | 1     | 1049  | 1049  | 3.81  | C_unshiu_02778 | 12229  | 13274  | 1046  | 5.69  | 98.1  |
| scaffold01364 | 3741  | 6231  | 2491  | 9.06  | C_unshiu_02778 | 15878  | 18370  | 2493  | 13.57 | 99.6  |
| scaffold01366 | 4615  | 6039  | 1425  | 5.19  | C_unshiu_02558 | 9875   | 11300  | 1426  | 6.18  | 99.16 |
| scaffold01366 | 6053  | 7145  | 1093  | 3.98  | C_unshiu_02558 | 15706  | 16799  | 1094  | 4.74  | 98.08 |
| scaffold01366 | 14498 | 16068 | 1571  | 5.72  | C_unshiu_00754 | 106314 | 104746 | 1569  | 1.16  | 99.43 |
| scaffold01368 | 1     | 1442  | 1442  | 5.26  | C_unshiu_02217 | 9256   | 7816   | 1441  | 4.41  | 99.45 |
| scaffold01368 | 2645  | 3937  | 1293  | 4.72  | C_unshiu_02217 | 6215   | 4916   | 1300  | 3.97  | 98.23 |
| scaffold01368 | 3959  | 6189  | 2231  | 8.14  | C_unshiu_00509 | 137834 | 135609 | 2226  | 1.18  | 99.6  |
| scaffold01369 | 13698 | 16397 | 2700  | 9.86  | C_unshiu_00127 | 252444 | 249752 | 2693  | 0.65  | 98.05 |
| scaffold01369 | 24629 | 26153 | 1525  | 5.57  | C_unshiu_00127 | 241914 | 240375 | 1540  | 0.37  | 98.25 |
| scaffold01369 | 26157 | 27356 | 1200  | 4.38  | C_unshiu_00127 | 242965 | 241766 | 1200  | 0.29  | 99.42 |
| scaffold01370 | 10507 | 11993 | 1487  | 5.43  | C_unshiu_00333 | 247494 | 246009 | 1486  | 0.59  | 98.12 |
| scaffold01370 | 14528 | 15814 | 1287  | 4.7   | C_unshiu_00333 | 244479 | 243193 | 1287  | 0.51  | 99.77 |
| scaffold01371 | 1     | 5201  | 5201  | 19.01 | C_unshiu_00134 | 295847 | 290609 | 5239  | 1.29  | 99.2  |
| scaffold01371 | 15643 | 20782 | 5140  | 18.79 | C_unshiu_00134 | 279750 | 274606 | 5145  | 1.26  | 98.08 |
| scaffold01371 | 23587 | 25225 | 1639  | 5.99  | C_unshiu_00372 | 56343  | 57981  | 1639  | 0.71  | 100   |
| scaffold01372 | 1     | 18815 | 18815 | 69.19 | C_unshiu_00120 | 27106  | 45919  | 18814 | 4.46  | 99.99 |
| scaffold01372 | 16304 | 24934 | 8631  | 31.74 | C_unshiu_00040 | 379189 | 387794 | 8606  | 1.31  | 98.89 |
| scaffold01373 | 24647 | 25995 | 1349  | 4.97  | C_unshiu_02201 | 20404  | 19058  | 1347  | 4.07  | 98.96 |
| scaffold01374 | 3313  | 4766  | 1454  | 5.36  | C_unshiu_01068 | 85380  | 86825  | 1446  | 1.46  | 98.29 |
| scaffold01374 | 12715 | 25319 | 12605 | 46.45 | C_unshiu_01630 | 43426  | 55997  | 12572 | 22.45 | 99.65 |
| scaffold01375 | 9319  | 15143 | 5825  | 21.48 | C_unshiu_01408 | 25498  | 31368  | 5871  | 8.37  | 98.84 |
| scaffold01375 | 16382 | 17401 | 1020  | 3.76  | C_unshiu_01408 | 32749  | 33768  | 1020  | 1.45  | 100   |
| scaffold01375 | 18207 | 22862 | 4656  | 17.17 | C_unshiu_00831 | 21939  | 26594  | 4656  | 3.73  | 100   |
| scaffold01376 | 8783  | 11742 | 2960  | 10.98 | C_unshiu_00381 | 66607  | 63648  | 2960  | 1.29  | 99.26 |
| scaffold01376 | 11530 | 17964 | 6435  | 23.87 | C_unshiu_00381 | 58035  | 51601  | 6435  | 2.81  | 99.6  |
| scaffold01376 | 18050 | 26955 | 8906  | 33.04 | C_unshiu_00381 | 51461  | 42576  | 8886  | 3.88  | 99.66 |
| scaffold01377 | 1706  | 23630 | 21925 | 82.06 | C_unshiu_00661 | 70306  | 48443  | 21864 | 14.25 | 99.28 |
| scaffold01377 | 23669 | 26021 | 2353  | 8.81  | C_unshiu_00661 | 46404  | 44063  | 2342  | 1.53  | 98.22 |
| scaffold01378 | 8394  | 9538  | 1145  | 4.3   | C_unshiu_00915 | 29636  | 28492  | 1145  | 0.99  | 100   |
| scaffold01379 | 1     | 2263  | 2263  | 8.49  | C_unshiu_00736 | 133050 | 130792 | 2259  | 1.64  | 99.82 |
| scaffold01379 | 2283  | 3542  | 1260  | 4.73  | C_unshiu_01293 | 61454  | 62714  | 1261  | 1.62  | 99.92 |
| scaffold01379 | 3533  | 5500  | 1968  | 7.38  | C_unshiu_00482 | 144143 | 142176 | 1968  | 1     | 100   |
| scaffold01379 | 6772  | 15801 | 9030  | 33.86 | C_unshiu_01293 | 65462  | 74565  | 9104  | 11.67 | 98.25 |
| scaffold01379 | 15847 | 17791 | 1945  | 7.29  | C_unshiu_01293 | 75020  | 76964  | 1945  | 2.49  | 99.95 |
| scaffold01380 | 6396  | 18363 | 11968 | 45.18 | C_unshiu_01087 | 17533  | 29500  | 11968 | 12.28 | 99.98 |
| scaffold01380 | 19536 | 26492 | 6957  | 26.26 | C_unshiu_01087 | 31166  | 38122  | 6957  | 7.14  | 99.91 |

|               |       |       |       |       |                |        |        |       |       |       |
|---------------|-------|-------|-------|-------|----------------|--------|--------|-------|-------|-------|
| scaffold01383 | 35    | 3551  | 3517  | 13.36 | C_unshiu_00185 | 33153  | 36650  | 3498  | 1.01  | 98.95 |
| scaffold01383 | 5308  | 6734  | 1427  | 5.42  | C_unshiu_00185 | 38782  | 40206  | 1425  | 0.41  | 99.79 |
| scaffold01383 | 6727  | 12214 | 5488  | 20.85 | C_unshiu_00185 | 40429  | 45916  | 5488  | 1.58  | 99.98 |
| scaffold01383 | 19535 | 22546 | 3012  | 11.44 | C_unshiu_00313 | 211447 | 208436 | 3012  | 1.16  | 100   |
| scaffold01384 | 10768 | 12220 | 1453  | 5.52  | C_unshiu_00610 | 5960   | 7417   | 1458  | 0.88  | 98.84 |
| scaffold01384 | 12225 | 24599 | 12375 | 47.02 | C_unshiu_02994 | 66     | 12441  | 12376 | 94.27 | 99.78 |
| scaffold01385 | 1653  | 10950 | 9298  | 35.39 | C_unshiu_00812 | 104867 | 114164 | 9298  | 7.31  | 99.99 |
| scaffold01386 | 1168  | 2764  | 1597  | 6.09  | C_unshiu_01428 | 45371  | 43775  | 1597  | 2.34  | 99.25 |
| scaffold01386 | 3902  | 9366  | 5465  | 20.82 | C_unshiu_01428 | 39624  | 34166  | 5459  | 7.99  | 99.03 |
| scaffold01386 | 9946  | 19921 | 9976  | 38.01 | C_unshiu_01428 | 33667  | 23672  | 9996  | 14.63 | 99.37 |
| scaffold01387 | 1     | 1097  | 1097  | 4.18  | C_unshiu_02747 | 16467  | 15371  | 1097  | 5.75  | 99.91 |
| scaffold01387 | 10196 | 12000 | 1805  | 6.88  | C_unshiu_02747 | 6185   | 4381   | 1805  | 9.46  | 99.67 |
| scaffold01387 | 13590 | 14722 | 1133  | 4.32  | C_unshiu_02647 | 13523  | 14654  | 1132  | 5.41  | 99.74 |
| scaffold01387 | 23425 | 25661 | 2237  | 8.52  | C_unshiu_01210 | 42378  | 44614  | 2237  | 2.65  | 100   |
| scaffold01388 | 2551  | 3630  | 1080  | 4.12  | C_unshiu_01007 | 2020   | 941    | 1080  | 1.03  | 100   |
| scaffold01388 | 15915 | 20409 | 4495  | 17.15 | C_unshiu_02016 | 35241  | 30750  | 4492  | 11.2  | 99.8  |
| scaffold01388 | 20416 | 22368 | 1953  | 7.45  | C_unshiu_00151 | 24838  | 26790  | 1953  | 0.51  | 99.69 |
| scaffold01388 | 23185 | 25655 | 2471  | 9.43  | C_unshiu_01009 | 60503  | 58036  | 2468  | 2.35  | 98.35 |
| scaffold01389 | 14561 | 15630 | 1070  | 4.1   | C_unshiu_00423 | 91590  | 90521  | 1070  | 0.49  | 100   |
| scaffold01389 | 17635 | 22300 | 4666  | 17.88 | C_unshiu_00423 | 88050  | 83382  | 4669  | 2.15  | 99.61 |
| scaffold01389 | 22426 | 24166 | 1741  | 6.67  | C_unshiu_00423 | 83215  | 81475  | 1741  | 0.8   | 99.89 |
| scaffold01389 | 24785 | 26100 | 1316  | 5.04  | C_unshiu_00423 | 81010  | 79694  | 1317  | 0.61  | 99.54 |
| scaffold01390 | 1     | 2169  | 2169  | 8.33  | C_unshiu_00211 | 148332 | 146163 | 2170  | 0.66  | 99.72 |
| scaffold01390 | 4802  | 6964  | 2163  | 8.31  | C_unshiu_00211 | 144952 | 142789 | 2164  | 0.66  | 98.75 |
| scaffold01390 | 6966  | 13315 | 6350  | 24.4  | C_unshiu_00631 | 59922  | 66271  | 6350  | 3.96  | 100   |
| scaffold01390 | 13976 | 18802 | 4827  | 18.55 | C_unshiu_01939 | 10661  | 15488  | 4828  | 11.16 | 99.83 |
| scaffold01390 | 19334 | 23592 | 4259  | 16.37 | C_unshiu_00356 | 64217  | 68478  | 4262  | 1.8   | 99.18 |
| scaffold01390 | 24075 | 25929 | 1855  | 7.13  | C_unshiu_00356 | 68998  | 70851  | 1854  | 0.78  | 99.14 |
| scaffold01391 | 1184  | 4188  | 3005  | 11.55 | C_unshiu_00218 | 56694  | 59728  | 3035  | 0.95  | 98.35 |
| scaffold01391 | 19607 | 21745 | 2139  | 8.22  | C_unshiu_02692 | 15434  | 13296  | 2139  | 10.7  | 100   |
| scaffold01392 | 1     | 3586  | 3586  | 13.81 | C_unshiu_01597 | 48781  | 52396  | 3616  | 6.28  | 98.65 |
| scaffold01392 | 3679  | 6961  | 3283  | 12.65 | C_unshiu_01597 | 52538  | 55808  | 3271  | 5.68  | 98.81 |
| scaffold01392 | 14779 | 18695 | 3917  | 15.09 | C_unshiu_02460 | 5087   | 9003   | 3917  | 15.17 | 99.97 |
| scaffold01392 | 21040 | 22763 | 1724  | 6.64  | C_unshiu_02592 | 17658  | 19381  | 1724  | 7.72  | 99.94 |
| scaffold01392 | 22990 | 24411 | 1422  | 5.48  | C_unshiu_02460 | 13974  | 15396  | 1423  | 5.51  | 99.44 |
| scaffold01393 | 9334  | 12674 | 3341  | 12.87 | C_unshiu_01337 | 13880  | 10523  | 3358  | 4.49  | 99.49 |
| scaffold01393 | 14058 | 18899 | 4842  | 18.65 | C_unshiu_01337 | 11695  | 6839   | 4857  | 6.49  | 98.35 |
| scaffold01394 | 4945  | 8776  | 3832  | 14.81 | C_unshiu_03098 | 3796   | 1      | 3796  | 39.92 | 99.01 |
| scaffold01394 | 13803 | 17781 | 3979  | 15.37 | C_unshiu_02993 | 1      | 3978   | 3978  | 30.28 | 99.97 |
| scaffold01394 | 22951 | 25215 | 2265  | 8.75  | C_unshiu_03098 | 5583   | 3321   | 2263  | 23.8  | 99.38 |
| scaffold01395 | 4089  | 10271 | 6183  | 23.91 | C_unshiu_00293 | 224264 | 218124 | 6141  | 2.28  | 99.11 |
| scaffold01395 | 10618 | 25843 | 15226 | 58.88 | C_unshiu_00293 | 217366 | 202187 | 15180 | 5.63  | 99.48 |
| scaffold01396 | 10050 | 11921 | 1872  | 7.26  | C_unshiu_01787 | 12008  | 10140  | 1869  | 3.81  | 98.93 |
| scaffold01396 | 24187 | 25790 | 1604  | 6.22  | C_unshiu_01500 | 914    | 2518   | 1605  | 2.53  | 99.5  |
| scaffold01398 | 1702  | 2972  | 1271  | 4.93  | C_unshiu_02947 | 8554   | 9823   | 1270  | 8.67  | 99.29 |
| scaffold01398 | 4863  | 5979  | 1117  | 4.33  | C_unshiu_02947 | 12209  | 13325  | 1117  | 7.63  | 99.11 |
| scaffold01398 | 5931  | 12916 | 6986  | 27.1  | C_unshiu_02652 | 20875  | 13889  | 6987  | 33.47 | 99.69 |
| scaffold01398 | 12952 | 14956 | 2005  | 7.78  | C_unshiu_02652 | 13987  | 11982  | 2006  | 9.61  | 99.7  |
| scaffold01398 | 15609 | 19854 | 4246  | 16.47 | C_unshiu_02652 | 10864  | 6619   | 4246  | 20.34 | 99.95 |
| scaffold01398 | 19848 | 22072 | 2225  | 8.63  | C_unshiu_00780 | 68296  | 70520  | 2225  | 1.7   | 100   |
| scaffold01399 | 15400 | 17353 | 1954  | 7.59  | C_unshiu_00466 | 197064 | 199017 | 1954  | 0.96  | 100   |
| scaffold01399 | 19754 | 21875 | 2122  | 8.24  | C_unshiu_00466 | 199821 | 201941 | 2121  | 1.05  | 99.91 |
| scaffold01401 | 3527  | 14499 | 10973 | 42.65 | C_unshiu_00856 | 122193 | 111230 | 10964 | 8.97  | 98.73 |
| scaffold01401 | 13598 | 22170 | 8573  | 33.32 | C_unshiu_00856 | 111825 | 103183 | 8643  | 7.07  | 98.85 |
| scaffold01401 | 22163 | 23245 | 1083  | 4.21  | C_unshiu_00231 | 122438 | 123520 | 1083  | 0.35  | 100   |
| scaffold01402 | 16222 | 18285 | 2064  | 8.06  | C_unshiu_00909 | 104336 | 106399 | 2064  | 1.78  | 99.81 |
| scaffold01404 | 1479  | 3734  | 2256  | 8.88  | C_unshiu_00222 | 45338  | 47592  | 2255  | 0.72  | 99.96 |
| scaffold01404 | 3812  | 6411  | 2600  | 10.24 | C_unshiu_00552 | 163315 | 165915 | 2601  | 1.46  | 98.62 |
| scaffold01404 | 6412  | 14551 | 8140  | 32.05 | C_unshiu_00222 | 50475  | 58547  | 8073  | 2.57  | 98.54 |
| scaffold01404 | 18261 | 19757 | 1497  | 5.89  | C_unshiu_00222 | 62311  | 63806  | 1496  | 0.48  | 99.6  |
| scaffold01404 | 22868 | 25398 | 2531  | 9.97  | C_unshiu_00222 | 68356  | 70886  | 2531  | 0.81  | 99.09 |
| scaffold01405 | 2569  | 3675  | 1107  | 4.38  | C_unshiu_01168 | 8651   | 9757   | 1107  | 1.25  | 99.82 |
| scaffold01406 | 8607  | 12339 | 3733  | 14.76 | C_unshiu_01689 | 48351  | 44619  | 3733  | 7.05  | 99.92 |
| scaffold01406 | 13841 | 15469 | 1629  | 6.44  | C_unshiu_01689 | 41773  | 40145  | 1629  | 3.07  | 100   |
| scaffold01406 | 15523 | 16955 | 1433  | 5.67  | C_unshiu_01689 | 40049  | 38617  | 1433  | 2.7   | 100   |
| scaffold01406 | 19506 | 20534 | 1029  | 4.07  | C_unshiu_01689 | 35491  | 34463  | 1029  | 1.94  | 100   |
| scaffold01406 | 22936 | 25287 | 2352  | 9.3   | C_unshiu_01689 | 31923  | 29572  | 2352  | 4.44  | 100   |
| scaffold01408 | 1     | 1220  | 1220  | 4.83  | C_unshiu_02631 | 18613  | 17402  | 1212  | 5.66  | 98.93 |
| scaffold01408 | 7974  | 12067 | 4094  | 16.21 | C_unshiu_02631 | 10058  | 5979   | 4080  | 19.04 | 98.46 |
| scaffold01408 | 10209 | 17477 | 7269  | 28.79 | C_unshiu_02631 | 7242   | 3      | 7240  | 33.78 | 98.75 |
| scaffold01409 | 9322  | 17513 | 8192  | 32.47 | C_unshiu_00673 | 112364 | 120555 | 8192  | 5.44  | 99.96 |
| scaffold01410 | 1     | 1406  | 1406  | 5.58  | C_unshiu_03100 | 8023   | 9411   | 1389  | 14.76 | 98.65 |
| scaffold01410 | 18875 | 20666 | 1792  | 7.11  | C_unshiu_02103 | 4752   | 6540   | 1789  | 4.92  | 99.78 |
| scaffold01410 | 21825 | 23271 | 1447  | 5.74  | C_unshiu_02103 | 8002   | 9449   | 1448  | 3.98  | 99.93 |
| scaffold01411 | 1     | 2026  | 2026  | 8.04  | C_unshiu_02855 | 7176   | 5151   | 2026  | 12.17 | 99.95 |
| scaffold01411 | 2034  | 3391  | 1358  | 5.39  | C_unshiu_00945 | 94657  | 95994  | 1338  | 1.2   | 98.31 |
| scaffold01411 | 4266  | 16818 | 12553 | 49.81 | C_unshiu_00945 | 97635  | 110166 | 12532 | 11.2  | 99.16 |
| scaffold01411 | 16815 | 21983 | 5169  | 20.51 | C_unshiu_01656 | 9924   | 15092  | 5169  | 9.4   | 100   |
| scaffold01412 | 1     | 4277  | 4277  | 16.99 | C_unshiu_02493 | 23273  | 18997  | 4277  | 17.28 | 100   |

|               |       |       |       |       |                |        |        |       |       |       |
|---------------|-------|-------|-------|-------|----------------|--------|--------|-------|-------|-------|
| scaffold01412 | 5888  | 16342 | 10455 | 41.52 | C_unshiu_02493 | 17542  | 7088   | 10455 | 42.25 | 99.96 |
| scaffold01412 | 20244 | 24649 | 4406  | 17.5  | C_unshiu_02904 | 6740   | 2335   | 4406  | 28.2  | 100   |
| scaffold01413 | 12753 | 23417 | 10665 | 42.49 | C_unshiu_00631 | 59926  | 49286  | 10641 | 6.63  | 99.16 |
| scaffold01414 | 469   | 1505  | 1037  | 4.14  | C_unshiu_00502 | 191011 | 189979 | 1033  | 0.54  | 98.85 |
| scaffold01414 | 21614 | 23818 | 2205  | 8.8   | C_unshiu_00456 | 92152  | 94348  | 2197  | 1.07  | 98.69 |
| scaffold01415 | 1     | 1814  | 1814  | 7.24  | C_unshiu_00940 | 50322  | 48515  | 1808  | 1.61  | 99.17 |
| scaffold01415 | 3826  | 5270  | 1445  | 5.77  | C_unshiu_00940 | 46221  | 44772  | 1450  | 1.29  | 98.21 |
| scaffold01415 | 7839  | 8950  | 1112  | 4.44  | C_unshiu_00940 | 44224  | 43112  | 1113  | 0.99  | 98.74 |
| scaffold01415 | 13785 | 19897 | 6113  | 24.4  | C_unshiu_01159 | 89858  | 83766  | 6093  | 6.78  | 99.44 |
| scaffold01416 | 6747  | 17308 | 10562 | 42.3  | C_unshiu_01428 | 1      | 10562  | 10562 | 15.46 | 100   |
| scaffold01416 | 17307 | 24653 | 7347  | 29.43 | C_unshiu_02316 | 18901  | 11555  | 7347  | 24.98 | 100   |
| scaffold01416 | 17309 | 24665 | 7357  | 29.47 | C_unshiu_01440 | 31826  | 39182  | 7357  | 10.92 | 99.97 |
| scaffold01417 | 1     | 24890 | 24890 | 100   | C_unshiu_02162 | 34263  | 9426   | 24838 | 71.83 | 99.68 |
| scaffold01419 | 7251  | 10608 | 3358  | 13.5  | C_unshiu_00997 | 49609  | 52968  | 3360  | 3.16  | 99.61 |
| scaffold01419 | 18689 | 20990 | 2302  | 9.26  | C_unshiu_00997 | 64145  | 66467  | 2323  | 2.18  | 98.36 |
| scaffold01420 | 1     | 24823 | 24823 | 99.99 | C_unshiu_00339 | 32096  | 7340   | 24757 | 9.92  | 99.34 |
| scaffold01422 | 11863 | 20143 | 8281  | 33.46 | C_unshiu_00097 | 44375  | 52657  | 8283  | 1.8   | 99.98 |
| scaffold01422 | 22313 | 23685 | 1373  | 5.55  | C_unshiu_00596 | 165495 | 164123 | 1373  | 0.81  | 99.93 |
| scaffold01422 | 23693 | 24747 | 1055  | 4.26  | C_unshiu_00596 | 167329 | 166275 | 1055  | 0.63  | 100   |
| scaffold01423 | 622   | 3214  | 2593  | 10.48 | C_unshiu_01832 | 2891   | 299    | 2593  | 5.48  | 99.96 |
| scaffold01423 | 6756  | 8769  | 2014  | 8.14  | C_unshiu_01127 | 76097  | 78110  | 2014  | 2.17  | 100   |
| scaffold01423 | 19602 | 21420 | 1819  | 7.35  | C_unshiu_00788 | 31855  | 33669  | 1815  | 1.39  | 99.67 |
| scaffold01423 | 23062 | 24742 | 1681  | 6.79  | C_unshiu_02623 | 14722  | 13042  | 1681  | 7.78  | 98.51 |
| scaffold01424 | 15583 | 21113 | 5531  | 22.39 | C_unshiu_03112 | 494    | 6003   | 5510  | 62.06 | 98.7  |
| scaffold01424 | 21464 | 24026 | 2563  | 10.38 | C_unshiu_03112 | 6318   | 8878   | 2561  | 28.85 | 99.92 |
| scaffold01425 | 856   | 2157  | 1302  | 5.27  | C_unshiu_01584 | 24425  | 23124  | 1302  | 2.23  | 99.62 |
| scaffold01425 | 2797  | 22628 | 19832 | 80.26 | C_unshiu_01584 | 22735  | 3005   | 19731 | 33.77 | 98.95 |
| scaffold01426 | 9007  | 24653 | 15647 | 63.47 | C_unshiu_00727 | 139247 | 123603 | 15645 | 11.24 | 99.96 |
| scaffold01428 | 1     | 4405  | 4405  | 17.96 | C_unshiu_01615 | 15684  | 20138  | 4455  | 7.83  | 98.86 |
| scaffold01428 | 6424  | 11543 | 5120  | 20.88 | C_unshiu_01615 | 37654  | 42797  | 5144  | 9.04  | 99.34 |
| scaffold01429 | 11897 | 14268 | 2372  | 9.71  | C_unshiu_00603 | 21019  | 18648  | 2372  | 1.42  | 99.87 |
| scaffold01430 | 1     | 1126  | 1126  | 4.61  | C_unshiu_00780 | 34795  | 33670  | 1126  | 0.86  | 100   |
| scaffold01430 | 1667  | 6912  | 5246  | 21.48 | C_unshiu_00988 | 6385   | 1134   | 5252  | 4.87  | 98.59 |
| scaffold01430 | 10485 | 11888 | 1404  | 5.75  | C_unshiu_02075 | 3323   | 4727   | 1405  | 3.74  | 98.15 |
| scaffold01430 | 18865 | 20375 | 1511  | 6.19  | C_unshiu_01506 | 41126  | 39623  | 1504  | 2.39  | 98.48 |
| scaffold01430 | 22699 | 24105 | 1407  | 5.76  | C_unshiu_01506 | 36972  | 35566  | 1407  | 2.24  | 100   |
| scaffold01431 | 9038  | 10274 | 1237  | 5.07  | C_unshiu_00597 | 162845 | 161611 | 1235  | 0.73  | 99.11 |
| scaffold01432 | 3372  | 7700  | 4329  | 17.75 | C_unshiu_00862 | 41654  | 45991  | 4338  | 3.57  | 98.92 |
| scaffold01432 | 8492  | 11452 | 2961  | 12.14 | C_unshiu_00862 | 45383  | 48343  | 2961  | 2.44  | 99.93 |
| scaffold01432 | 13040 | 14650 | 1611  | 6.61  | C_unshiu_00862 | 49616  | 51226  | 1611  | 1.33  | 99.5  |
| scaffold01432 | 14650 | 15704 | 1055  | 4.33  | C_unshiu_00637 | 116194 | 115140 | 1055  | 0.66  | 100   |
| scaffold01432 | 16598 | 17674 | 1077  | 4.42  | C_unshiu_00025 | 755138 | 754079 | 1060  | 0.14  | 98.24 |
| scaffold01432 | 19649 | 21861 | 2213  | 9.07  | C_unshiu_00025 | 753591 | 751380 | 2212  | 0.29  | 99.59 |
| scaffold01433 | 1     | 2821  | 2821  | 11.57 | C_unshiu_00421 | 188087 | 185265 | 2823  | 1.29  | 99.36 |
| scaffold01433 | 15015 | 16591 | 1577  | 6.47  | C_unshiu_02036 | 24787  | 26362  | 1576  | 4.02  | 99.62 |
| scaffold01433 | 16585 | 18306 | 1722  | 7.06  | C_unshiu_02036 | 27082  | 28807  | 1726  | 4.4   | 99.59 |
| scaffold01433 | 19746 | 20749 | 1004  | 4.12  | C_unshiu_02036 | 30309  | 31312  | 1004  | 2.56  | 99.9  |
| scaffold01434 | 20661 | 24354 | 3694  | 15.17 | C_unshiu_00073 | 28690  | 24986  | 3705  | 0.72  | 98.2  |
| scaffold01435 | 3212  | 5819  | 2608  | 10.71 | C_unshiu_03108 | 6434   | 9043   | 2610  | 28.86 | 99.89 |
| scaffold01435 | 20280 | 24358 | 4079  | 16.75 | C_unshiu_00879 | 14595  | 10508  | 4088  | 3.42  | 99.78 |
| scaffold01436 | 2852  | 13047 | 10196 | 41.89 | C_unshiu_00316 | 227252 | 237461 | 10210 | 3.95  | 99.76 |
| scaffold01436 | 17975 | 21400 | 3426  | 14.08 | C_unshiu_00316 | 241623 | 245047 | 3425  | 1.33  | 99.65 |
| scaffold01438 | 1     | 23787 | 23787 | 97.91 | C_unshiu_01021 | 10645  | 34431  | 23787 | 22.92 | 99.97 |
| scaffold01439 | 868   | 13842 | 12975 | 53.52 | C_unshiu_01593 | 17     | 12977  | 12961 | 22.43 | 99.63 |
| scaffold01439 | 15673 | 24243 | 8571  | 35.35 | C_unshiu_01593 | 15352  | 23922  | 8571  | 14.83 | 99.8  |
| scaffold01440 | 3956  | 4965  | 1010  | 4.18  | C_unshiu_00333 | 211990 | 210979 | 1012  | 0.4   | 99.7  |
| scaffold01440 | 5237  | 9464  | 4228  | 17.48 | C_unshiu_00333 | 210722 | 206468 | 4255  | 1.69  | 98.21 |
| scaffold01440 | 16835 | 18406 | 1572  | 6.5   | C_unshiu_00333 | 200765 | 199190 | 1576  | 0.63  | 98.41 |
| scaffold01440 | 19188 | 24190 | 5003  | 20.68 | C_unshiu_00427 | 27125  | 22102  | 5024  | 2.32  | 99.56 |
| scaffold01441 | 1     | 1224  | 1224  | 5.06  | C_unshiu_00314 | 28411  | 27186  | 1226  | 0.47  | 98.7  |
| scaffold01441 | 11006 | 12133 | 1128  | 4.66  | C_unshiu_00314 | 23363  | 22218  | 1146  | 0.44  | 98.17 |
| scaffold01441 | 13626 | 23930 | 10305 | 42.61 | C_unshiu_00314 | 18938  | 8613   | 10326 | 3.99  | 98.67 |
| scaffold01442 | 15688 | 17126 | 1439  | 5.96  | C_unshiu_00254 | 85135  | 83711  | 1425  | 0.48  | 98.68 |
| scaffold01443 | 1926  | 3451  | 1526  | 6.33  | C_unshiu_00044 | 226263 | 224738 | 1526  | 0.24  | 100   |
| scaffold01443 | 12662 | 15558 | 2897  | 12.02 | C_unshiu_01457 | 12114  | 15018  | 2905  | 4.4   | 98.93 |
| scaffold01444 | 5335  | 6841  | 1507  | 6.27  | C_unshiu_00670 | 71097  | 69590  | 1508  | 0.99  | 99.67 |
| scaffold01444 | 7608  | 9769  | 2162  | 8.99  | C_unshiu_00670 | 68526  | 66371  | 2156  | 1.41  | 99.17 |
| scaffold01445 | 3312  | 4540  | 1229  | 5.12  | C_unshiu_00034 | 253060 | 254276 | 1217  | 0.17  | 98.45 |
| scaffold01445 | 6207  | 8285  | 2079  | 8.65  | C_unshiu_00034 | 256041 | 258110 | 2070  | 0.3   | 99.09 |
| scaffold01445 | 11785 | 12920 | 1136  | 4.73  | C_unshiu_00034 | 261311 | 262446 | 1136  | 0.16  | 99.21 |
| scaffold01446 | 1976  | 10767 | 8792  | 36.63 | C_unshiu_02216 | 5649   | 14440  | 8792  | 26.86 | 99.98 |
| scaffold01446 | 12555 | 24001 | 11447 | 47.69 | C_unshiu_02216 | 16806  | 28236  | 11431 | 34.93 | 98.71 |
| scaffold01447 | 11645 | 17452 | 5808  | 24.28 | C_unshiu_01437 | 54302  | 48495  | 5808  | 8.56  | 100   |
| scaffold01448 | 20113 | 23900 | 3788  | 15.85 | C_unshiu_00018 | 366552 | 370339 | 3788  | 0.44  | 99    |
| scaffold01449 | 1     | 20570 | 20570 | 86.24 | C_unshiu_00517 | 152078 | 172654 | 20577 | 11.06 | 99.52 |
| scaffold01450 | 2436  | 3990  | 1555  | 6.53  | C_unshiu_00148 | 169949 | 171503 | 1555  | 0.4   | 99.94 |
| scaffold01450 | 12910 | 16381 | 3472  | 14.57 | C_unshiu_01791 | 30222  | 33707  | 3486  | 7.15  | 99.11 |
| scaffold01450 | 21857 | 23831 | 1975  | 8.29  | C_unshiu_01791 | 35179  | 37153  | 1975  | 4.05  | 99.19 |
| scaffold01451 | 2776  | 6278  | 3503  | 14.73 | C_unshiu_01730 | 33131  | 29629  | 3503  | 6.8   | 99.97 |

|               |       |       |       |       |                |        |        |       |       |       |
|---------------|-------|-------|-------|-------|----------------|--------|--------|-------|-------|-------|
| scaffold01451 | 6319  | 7931  | 1613  | 6.78  | C_unshiu_01094 | 28801  | 27190  | 1612  | 1.67  | 98.82 |
| scaffold01451 | 13985 | 23775 | 9791  | 41.18 | C_unshiu_02866 | 2622   | 12412  | 9791  | 59.5  | 99.9  |
| scaffold01452 | 6021  | 7172  | 1152  | 4.85  | C_unshiu_00056 | 565669 | 566820 | 1152  | 0.19  | 100   |
| scaffold01452 | 7758  | 9048  | 1291  | 5.44  | C_unshiu_00056 | 560222 | 561509 | 1288  | 0.22  | 99.46 |
| scaffold01452 | 9272  | 12586 | 3315  | 13.96 | C_unshiu_00056 | 562118 | 565432 | 3315  | 0.56  | 100   |
| scaffold01452 | 13775 | 23744 | 9970  | 41.99 | C_unshiu_00056 | 567155 | 577125 | 9971  | 1.68  | 99.85 |
| scaffold01453 | 13694 | 16364 | 2671  | 11.29 | C_unshiu_00181 | 316672 | 314013 | 2660  | 0.75  | 98.88 |
| scaffold01453 | 21809 | 22976 | 1168  | 4.94  | C_unshiu_00181 | 308426 | 307259 | 1168  | 0.33  | 99.06 |
| scaffold01454 | 6341  | 17317 | 10977 | 46.52 | C_unshiu_01449 | 60870  | 50022  | 10849 | 16.29 | 98.07 |
| scaffold01454 | 22311 | 23597 | 1287  | 5.45  | C_unshiu_01449 | 45003  | 43717  | 1287  | 1.93  | 99.84 |
| scaffold01455 | 67    | 1546  | 1480  | 6.3   | C_unshiu_01239 | 73618  | 72145  | 1474  | 1.8   | 98.72 |
| scaffold01455 | 2399  | 6249  | 3851  | 16.4  | C_unshiu_01127 | 92971  | 89121  | 3851  | 4.14  | 99.74 |
| scaffold01455 | 6243  | 7822  | 1580  | 6.73  | C_unshiu_00790 | 26348  | 24769  | 1580  | 1.22  | 100   |
| scaffold01455 | 7880  | 18204 | 10325 | 43.96 | C_unshiu_01127 | 88871  | 78537  | 10335 | 11.12 | 99.33 |
| scaffold01455 | 20571 | 21825 | 1255  | 5.34  | C_unshiu_01127 | 76078  | 74837  | 1242  | 1.34  | 98.1  |
| scaffold01456 | 2202  | 10380 | 8179  | 34.9  | C_unshiu_00061 | 488219 | 480138 | 8082  | 1.4   | 98.51 |
| scaffold01456 | 10927 | 12598 | 1672  | 7.13  | C_unshiu_00061 | 479067 | 477396 | 1672  | 0.29  | 99.82 |
| scaffold01456 | 12693 | 14245 | 1553  | 6.63  | C_unshiu_00061 | 477287 | 475735 | 1553  | 0.27  | 99.03 |
| scaffold01456 | 14373 | 23437 | 9065  | 38.68 | C_unshiu_00061 | 475219 | 466154 | 9066  | 1.57  | 99.79 |
| scaffold01457 | 18715 | 19868 | 1154  | 4.92  | C_unshiu_02280 | 17873  | 16720  | 1154  | 3.8   | 99.22 |
| scaffold01459 | 1     | 1084  | 1084  | 4.63  | C_unshiu_00413 | 41414  | 42502  | 1089  | 0.49  | 99.45 |
| scaffold01459 | 3468  | 16296 | 12829 | 54.85 | C_unshiu_00413 | 45760  | 58596  | 12837 | 5.81  | 99.84 |
| scaffold01459 | 17307 | 18774 | 1468  | 6.28  | C_unshiu_00413 | 60058  | 61525  | 1468  | 0.66  | 100   |
| scaffold01459 | 18781 | 22957 | 4177  | 17.86 | C_unshiu_00413 | 61984  | 66179  | 4196  | 1.9   | 98.83 |
| scaffold01460 | 2436  | 14091 | 11656 | 49.95 | C_unshiu_00030 | 17818  | 6170   | 11649 | 1.64  | 99.57 |
| scaffold01460 | 18003 | 20756 | 2754  | 11.8  | C_unshiu_00030 | 3260   | 505    | 2756  | 0.39  | 99.53 |
| scaffold01461 | 5619  | 7751  | 2133  | 9.15  | C_unshiu_01969 | 25161  | 23029  | 2133  | 5.1   | 100   |
| scaffold01461 | 7752  | 9631  | 1880  | 8.06  | C_unshiu_01947 | 3765   | 1887   | 1879  | 4.38  | 99.52 |
| scaffold01461 | 16266 | 22253 | 5988  | 25.68 | C_unshiu_00352 | 194171 | 188184 | 5988  | 2.5   | 100   |
| scaffold01462 | 1     | 17892 | 17892 | 76.83 | C_unshiu_01500 | 22824  | 40715  | 17892 | 28.25 | 100   |
| scaffold01463 | 1     | 23179 | 23179 | 99.96 | C_unshiu_00804 | 36584  | 13439  | 23146 | 18.1  | 99.85 |
| scaffold01464 | 5235  | 8783  | 3549  | 15.39 | C_unshiu_00632 | 1      | 3548   | 3548  | 2.21  | 99.86 |
| scaffold01464 | 8783  | 17616 | 8834  | 38.3  | C_unshiu_00632 | 5102   | 13934  | 8833  | 5.51  | 99.98 |
| scaffold01464 | 19427 | 23064 | 3638  | 15.77 | C_unshiu_00632 | 16304  | 19941  | 3638  | 2.27  | 100   |
| scaffold01467 | 1     | 2983  | 2983  | 13    | C_unshiu_01084 | 88268  | 91250  | 2983  | 3.06  | 100   |
| scaffold01467 | 15790 | 19935 | 4146  | 18.06 | C_unshiu_00950 | 28333  | 32488  | 4156  | 3.73  | 99.4  |
| scaffold01468 | 11244 | 15314 | 4071  | 17.75 | C_unshiu_00362 | 44649  | 40568  | 4082  | 1.73  | 99.22 |
| scaffold01468 | 15678 | 19155 | 3478  | 15.16 | C_unshiu_00975 | 94937  | 91452  | 3486  | 3.2   | 99.45 |
| scaffold01468 | 21251 | 22936 | 1686  | 7.35  | C_unshiu_00362 | 34620  | 32935  | 1686  | 0.71  | 100   |
| scaffold01469 | 4689  | 7234  | 2546  | 11.11 | C_unshiu_00179 | 280907 | 278382 | 2526  | 0.7   | 98.04 |
| scaffold01469 | 7229  | 9260  | 2032  | 8.87  | C_unshiu_00746 | 41230  | 43261  | 2032  | 1.49  | 100   |
| scaffold01469 | 9261  | 11524 | 2264  | 9.88  | C_unshiu_00179 | 275910 | 273628 | 2283  | 0.64  | 98.2  |
| scaffold01469 | 13313 | 22793 | 9481  | 41.38 | C_unshiu_00179 | 270145 | 260633 | 9513  | 2.65  | 98.52 |
| scaffold01470 | 3239  | 6409  | 3171  | 13.85 | C_unshiu_00351 | 40215  | 43385  | 3171  | 1.32  | 99.97 |
| scaffold01470 | 6429  | 12061 | 5633  | 24.6  | C_unshiu_01806 | 14016  | 8386   | 5631  | 11.67 | 99.41 |
| scaffold01470 | 14787 | 15833 | 1047  | 4.57  | C_unshiu_01439 | 58080  | 59129  | 1050  | 1.55  | 98.86 |
| scaffold01470 | 16407 | 19714 | 3308  | 14.45 | C_unshiu_01439 | 59812  | 63116  | 3305  | 4.89  | 99.82 |
| scaffold01471 | 1     | 10511 | 10511 | 45.92 | C_unshiu_01412 | 24770  | 14254  | 10517 | 15.02 | 99.43 |
| scaffold01471 | 10690 | 12585 | 1896  | 8.28  | C_unshiu_01412 | 13900  | 12004  | 1897  | 2.71  | 99.95 |
| scaffold01471 | 11935 | 14612 | 2678  | 11.7  | C_unshiu_01412 | 9420   | 6743   | 2678  | 3.83  | 98.92 |
| scaffold01471 | 15749 | 20858 | 5110  | 22.33 | C_unshiu_01412 | 5115   | 2      | 5114  | 7.31  | 99.61 |
| scaffold01472 | 17711 | 22850 | 5140  | 22.49 | C_unshiu_00505 | 147003 | 152144 | 5142  | 2.71  | 99.22 |
| scaffold01475 | 1484  | 9129  | 7646  | 33.56 | C_unshiu_00588 | 106290 | 113946 | 7657  | 4.51  | 99.46 |
| scaffold01477 | 5591  | 9301  | 3711  | 16.31 | C_unshiu_00193 | 57730  | 54021  | 3710  | 1.09  | 99.92 |
| scaffold01477 | 9884  | 16197 | 6314  | 27.75 | C_unshiu_02381 | 10976  | 4659   | 6318  | 22.83 | 99.79 |
| scaffold01478 | 9445  | 14348 | 4904  | 21.57 | C_unshiu_00517 | 149537 | 144634 | 4904  | 2.64  | 100   |
| scaffold01478 | 15606 | 22106 | 6501  | 28.59 | C_unshiu_01138 | 30536  | 37036  | 6501  | 7.05  | 100   |
| scaffold01479 | 4955  | 18928 | 13974 | 61.51 | C_unshiu_00741 | 116831 | 130775 | 13945 | 10.15 | 99.46 |
| scaffold01481 | 16692 | 17757 | 1066  | 4.71  | C_unshiu_01355 | 35871  | 36937  | 1067  | 1.45  | 99.44 |
| scaffold01482 | 7109  | 8498  | 1390  | 6.15  | C_unshiu_00980 | 106715 | 108104 | 1390  | 1.28  | 98.42 |
| scaffold01482 | 11478 | 15943 | 4466  | 19.74 | C_unshiu_00835 | 59551  | 64019  | 4469  | 3.6   | 99.58 |
| scaffold01482 | 21608 | 22620 | 1013  | 4.48  | C_unshiu_00835 | 69649  | 70662  | 1014  | 0.82  | 99.21 |
| scaffold01483 | 2127  | 5474  | 3348  | 14.83 | C_unshiu_00121 | 120852 | 117503 | 3350  | 0.79  | 98.33 |
| scaffold01483 | 10944 | 14965 | 4022  | 17.81 | C_unshiu_00121 | 111901 | 107871 | 4031  | 0.96  | 99.63 |
| scaffold01484 | 14221 | 20303 | 6083  | 26.94 | C_unshiu_00995 | 106528 | 100475 | 6054  | 5.67  | 99.26 |
| scaffold01485 | 5787  | 12402 | 6616  | 29.31 | C_unshiu_00875 | 11727  | 18340  | 6614  | 5.52  | 99.86 |
| scaffold01485 | 14381 | 22347 | 7967  | 35.29 | C_unshiu_00875 | 20682  | 28640  | 7959  | 6.65  | 99.75 |
| scaffold01486 | 8063  | 11717 | 3655  | 16.29 | C_unshiu_02676 | 3662   | 1      | 3662  | 17.97 | 98.56 |
| scaffold01486 | 14386 | 22436 | 8051  | 35.88 | C_unshiu_02676 | 10126  | 18161  | 8036  | 39.44 | 98.59 |
| scaffold01487 | 4117  | 5156  | 1040  | 4.64  | C_unshiu_00272 | 92308  | 93347  | 1040  | 0.37  | 100   |
| scaffold01487 | 13509 | 16037 | 2529  | 11.29 | C_unshiu_00935 | 61518  | 58978  | 2541  | 2.25  | 98.98 |
| scaffold01487 | 16028 | 21710 | 5683  | 25.38 | C_unshiu_00906 | 78952  | 84634  | 5683  | 4.88  | 99.98 |
| scaffold01488 | 5909  | 11651 | 5743  | 25.64 | C_unshiu_01422 | 7253   | 12974  | 5722  | 8.27  | 99.13 |
| scaffold01488 | 13002 | 14236 | 1235  | 5.51  | C_unshiu_01422 | 14606  | 15840  | 1235  | 1.79  | 99.68 |
| scaffold01489 | 6909  | 8571  | 1663  | 7.46  | C_unshiu_01312 | 42317  | 43983  | 1667  | 2.19  | 98.68 |
| scaffold01489 | 9759  | 11843 | 2085  | 9.35  | C_unshiu_00854 | 122312 | 120226 | 2087  | 1.71  | 99.62 |
| scaffold01491 | 1     | 3343  | 3343  | 14.99 | C_unshiu_00964 | 92819  | 96137  | 3319  | 3.01  | 98.98 |
| scaffold01491 | 3712  | 14953 | 11242 | 50.41 | C_unshiu_00634 | 115222 | 103963 | 11260 | 7.04  | 99.8  |
| scaffold01492 | 1     | 3304  | 3304  | 14.84 | C_unshiu_01874 | 23186  | 19875  | 3312  | 7.26  | 98.67 |

|               |       |       |       |       |                |        |        |       |       |       |
|---------------|-------|-------|-------|-------|----------------|--------|--------|-------|-------|-------|
| scaffold01492 | 9163  | 12736 | 3574  | 16.05 | C_unshiu_01308 | 50290  | 53881  | 3592  | 4.7   | 98.16 |
| scaffold01492 | 14357 | 17052 | 2696  | 12.11 | C_unshiu_01874 | 8638   | 5961   | 2678  | 5.87  | 99.18 |
| scaffold01492 | 21109 | 22270 | 1162  | 5.22  | C_unshiu_01874 | 1957   | 796    | 1162  | 2.55  | 100   |
| scaffold01493 | 1     | 1737  | 1737  | 7.82  | C_unshiu_01824 | 37976  | 36240  | 1737  | 3.66  | 100   |
| scaffold01493 | 3492  | 5109  | 1618  | 7.29  | C_unshiu_01824 | 34238  | 32618  | 1621  | 3.41  | 98.52 |
| scaffold01493 | 6444  | 8885  | 2442  | 11    | C_unshiu_01020 | 40199  | 37778  | 2422  | 2.33  | 98.24 |
| scaffold01493 | 10099 | 11760 | 1662  | 7.48  | C_unshiu_00492 | 165406 | 167067 | 1662  | 0.85  | 98.92 |
| scaffold01493 | 12910 | 14442 | 1533  | 6.9   | C_unshiu_00492 | 167594 | 169126 | 1533  | 0.79  | 100   |
| scaffold01494 | 3531  | 6274  | 2744  | 12.45 | C_unshiu_00330 | 109331 | 112090 | 2760  | 1.09  | 99.13 |
| scaffold01494 | 8683  | 9951  | 1269  | 5.76  | C_unshiu_00330 | 114724 | 115992 | 1269  | 0.5   | 99.61 |
| scaffold01494 | 15511 | 17669 | 2159  | 9.79  | C_unshiu_00330 | 123004 | 125161 | 2158  | 0.86  | 98.11 |
| scaffold01495 | 10513 | 16517 | 6005  | 27.19 | C_unshiu_00974 | 53761  | 47772  | 5990  | 5.5   | 98.52 |
| scaffold01496 | 3438  | 14683 | 11246 | 50.94 | C_unshiu_02651 | 1805   | 12991  | 11187 | 53.58 | 98.42 |
| scaffold01496 | 14922 | 16581 | 1660  | 7.52  | C_unshiu_02651 | 13538  | 15197  | 1660  | 7.95  | 99.58 |
| scaffold01496 | 16838 | 19481 | 2644  | 11.98 | C_unshiu_02651 | 15677  | 18320  | 2644  | 12.66 | 99.62 |
| scaffold01497 | 1     | 13347 | 13347 | 60.51 | C_unshiu_00131 | 33906  | 47243  | 13338 | 3.24  | 99.9  |
| scaffold01498 | 3823  | 6434  | 2612  | 11.86 | C_unshiu_00981 | 93204  | 90592  | 2613  | 2.4   | 99.2  |
| scaffold01498 | 6435  | 7603  | 1169  | 5.31  | C_unshiu_00981 | 86835  | 85662  | 1174  | 1.08  | 98.72 |
| scaffold01498 | 12245 | 15234 | 2990  | 13.58 | C_unshiu_00780 | 18027  | 21016  | 2990  | 2.28  | 100   |
| scaffold01499 | 5880  | 9667  | 3788  | 17.25 | C_unshiu_00654 | 56117  | 59904  | 3788  | 2.45  | 99.42 |
| scaffold01499 | 15873 | 21965 | 6093  | 27.74 | C_unshiu_00654 | 64607  | 70699  | 6093  | 3.93  | 99.9  |
| scaffold01500 | 19153 | 21928 | 2776  | 12.66 | C_unshiu_00376 | 88179  | 90978  | 2800  | 1.21  | 98.15 |
| scaffold01501 | 1158  | 2463  | 1306  | 5.97  | C_unshiu_00589 | 157976 | 159281 | 1306  | 0.77  | 98.62 |
| scaffold01501 | 6012  | 9885  | 3874  | 17.72 | C_unshiu_00589 | 161116 | 164997 | 3882  | 2.29  | 99.41 |
| scaffold01501 | 12352 | 15160 | 2809  | 12.85 | C_unshiu_00589 | 149370 | 152180 | 2811  | 1.66  | 99.93 |
| scaffold01501 | 15151 | 16221 | 1071  | 4.9   | C_unshiu_01164 | 25799  | 26869  | 1071  | 1.2   | 100   |
| scaffold01502 | 19466 | 21844 | 2379  | 10.89 | C_unshiu_00596 | 114752 | 117129 | 2378  | 1.41  | 99.03 |
| scaffold01503 | 3328  | 5609  | 2282  | 10.45 | C_unshiu_02300 | 1      | 2282   | 2282  | 7.64  | 99.91 |
| scaffold01503 | 5603  | 6787  | 1185  | 5.43  | C_unshiu_02167 | 18153  | 19337  | 1185  | 3.43  | 100   |
| scaffold01503 | 6788  | 9353  | 2566  | 11.76 | C_unshiu_02300 | 3831   | 6396   | 2566  | 8.59  | 100   |
| scaffold01504 | 970   | 6093  | 5124  | 23.56 | C_unshiu_00125 | 348892 | 343773 | 5120  | 1.22  | 98.87 |
| scaffold01504 | 4387  | 6831  | 2445  | 11.24 | C_unshiu_01456 | 63312  | 65749  | 2438  | 3.69  | 99.55 |
| scaffold01504 | 8875  | 14553 | 5679  | 26.11 | C_unshiu_00125 | 345498 | 339800 | 5699  | 1.36  | 99.23 |
| scaffold01505 | 3110  | 7466  | 4357  | 20.02 | C_unshiu_01455 | 42909  | 38563  | 4347  | 6.57  | 99.5  |
| scaffold01505 | 7494  | 21583 | 14090 | 64.74 | C_unshiu_01455 | 38301  | 24229  | 14073 | 21.28 | 99.77 |
| scaffold01506 | 20657 | 21775 | 1119  | 5.14  | C_unshiu_00563 | 95903  | 94783  | 1121  | 0.64  | 98.75 |
| scaffold01507 | 2415  | 15217 | 12803 | 58.91 | C_unshiu_00088 | 422658 | 435432 | 12775 | 2.72  | 99.2  |
| scaffold01508 | 1     | 10828 | 10828 | 49.99 | C_unshiu_00884 | 84592  | 95420  | 10829 | 9.11  | 99.94 |
| scaffold01509 | 10413 | 11709 | 1297  | 5.99  | C_unshiu_00222 | 109758 | 111053 | 1296  | 0.41  | 99.61 |
| scaffold01510 | 12540 | 21627 | 9088  | 42.02 | C_unshiu_00533 | 97117  | 106200 | 9084  | 4.97  | 99.76 |
| scaffold01512 | 14607 | 17264 | 2658  | 12.3  | C_unshiu_03132 | 4660   | 2016   | 2645  | 38.13 | 99.21 |
| scaffold01514 | 11862 | 13993 | 2132  | 9.89  | C_unshiu_00233 | 6574   | 8705   | 2132  | 0.7   | 100   |
| scaffold01514 | 14298 | 20952 | 6655  | 30.87 | C_unshiu_00233 | 9173   | 15833  | 6661  | 2.18  | 99.88 |
| scaffold01516 | 1     | 1794  | 1794  | 8.36  | C_unshiu_00629 | 113492 | 115285 | 1794  | 1.11  | 100   |
| scaffold01516 | 1788  | 2837  | 1050  | 4.89  | C_unshiu_00180 | 15118  | 16167  | 1050  | 0.29  | 100   |
| scaffold01516 | 3747  | 6764  | 3018  | 14.06 | C_unshiu_00629 | 117424 | 120442 | 3019  | 1.88  | 98.68 |
| scaffold01516 | 7541  | 9377  | 1837  | 8.56  | C_unshiu_00239 | 17196  | 19032  | 1837  | 0.61  | 99.35 |
| scaffold01516 | 11011 | 14732 | 3722  | 17.33 | C_unshiu_00239 | 20705  | 24426  | 3722  | 1.23  | 99.68 |
| scaffold01516 | 15419 | 18438 | 3020  | 14.06 | C_unshiu_00239 | 25442  | 28462  | 3021  | 1     | 99.83 |
| scaffold01517 | 4828  | 8824  | 3997  | 18.63 | C_unshiu_00036 | 295429 | 299425 | 3997  | 0.59  | 100   |
| scaffold01518 | 10248 | 13452 | 3205  | 14.95 | C_unshiu_00406 | 34904  | 31700  | 3205  | 1.44  | 100   |
| scaffold01518 | 13466 | 15555 | 2090  | 9.75  | C_unshiu_01935 | 10229  | 8140   | 2090  | 4.82  | 100   |
| scaffold01518 | 15887 | 21261 | 5375  | 25.08 | C_unshiu_01935 | 7363   | 1988   | 5376  | 12.41 | 99.96 |
| scaffold01519 | 16    | 2784  | 2769  | 12.92 | C_unshiu_00587 | 145453 | 148215 | 2763  | 1.62  | 98.49 |
| scaffold01519 | 20302 | 21433 | 1132  | 5.28  | C_unshiu_00587 | 158415 | 159553 | 1139  | 0.67  | 98.68 |
| scaffold01520 | 1     | 10572 | 10572 | 49.39 | C_unshiu_00818 | 16381  | 26923  | 10543 | 8.33  | 98.7  |
| scaffold01520 | 13494 | 21021 | 7528  | 35.17 | C_unshiu_00818 | 29254  | 36780  | 7527  | 5.95  | 99.81 |
| scaffold01521 | 1     | 1858  | 1858  | 8.69  | C_unshiu_02208 | 25937  | 27794  | 1858  | 5.64  | 99.95 |
| scaffold01521 | 3255  | 5555  | 2301  | 10.76 | C_unshiu_00712 | 6724   | 9042   | 2319  | 1.63  | 98.06 |
| scaffold01522 | 5477  | 7286  | 1810  | 8.5   | C_unshiu_01569 | 56952  | 55144  | 1809  | 3.06  | 99.17 |
| scaffold01522 | 12966 | 14403 | 1438  | 6.75  | C_unshiu_01569 | 49341  | 47904  | 1438  | 2.43  | 99.79 |
| scaffold01522 | 16723 | 19539 | 2817  | 13.23 | C_unshiu_00324 | 61857  | 59041  | 2817  | 1.11  | 100   |
| scaffold01523 | 4049  | 7516  | 3468  | 16.28 | C_unshiu_01468 | 44910  | 41425  | 3486  | 5.32  | 98.48 |
| scaffold01523 | 8504  | 10680 | 2177  | 10.22 | C_unshiu_02714 | 4321   | 6499   | 2179  | 11.1  | 98.99 |
| scaffold01523 | 10716 | 12489 | 1774  | 8.33  | C_unshiu_02714 | 6931   | 8704   | 1774  | 9.03  | 100   |
| scaffold01523 | 13735 | 20005 | 6271  | 29.44 | C_unshiu_02714 | 10260  | 16532  | 6273  | 31.94 | 99.76 |
| scaffold01524 | 3824  | 4845  | 1022  | 4.8   | C_unshiu_00273 | 275954 | 274934 | 1021  | 0.37  | 98.63 |
| scaffold01524 | 7444  | 9866  | 2423  | 11.38 | C_unshiu_02563 | 17771  | 15351  | 2421  | 10.51 | 99.92 |
| scaffold01524 | 10104 | 16080 | 5977  | 28.08 | C_unshiu_02563 | 14999  | 9023   | 5977  | 25.94 | 99.7  |
| scaffold01524 | 16179 | 17987 | 1809  | 8.5   | C_unshiu_02563 | 8879   | 7071   | 1809  | 7.85  | 100   |
| scaffold01524 | 18026 | 19587 | 1562  | 7.34  | C_unshiu_02563 | 6786   | 5225   | 1562  | 6.78  | 100   |
| scaffold01524 | 19589 | 20630 | 1042  | 4.9   | C_unshiu_00095 | 458787 | 457746 | 1042  | 0.22  | 100   |
| scaffold01526 | 14590 | 16661 | 2072  | 9.76  | C_unshiu_01889 | 11678  | 13748  | 2071  | 4.6   | 99.28 |
| scaffold01526 | 18041 | 19532 | 1492  | 7.03  | C_unshiu_01889 | 21310  | 22801  | 1492  | 3.31  | 99.8  |
| scaffold01527 | 105   | 2554  | 2450  | 11.58 | C_unshiu_01794 | 8578   | 11031  | 2454  | 5.05  | 99.43 |
| scaffold01527 | 5125  | 6902  | 1778  | 8.4   | C_unshiu_01794 | 13401  | 15179  | 1779  | 3.66  | 99.89 |
| scaffold01527 | 7508  | 9734  | 2227  | 10.53 | C_unshiu_01794 | 16247  | 18478  | 2232  | 4.59  | 99.06 |
| scaffold01527 | 11301 | 15070 | 3770  | 17.82 | C_unshiu_01405 | 3772   | 1      | 3772  | 5.37  | 99.55 |
| scaffold01528 | 18    | 2020  | 2003  | 9.48  | C_unshiu_00357 | 207887 | 205900 | 1988  | 0.84  | 98.01 |

|               |       |       |       |       |                |        |        |       |       |       |
|---------------|-------|-------|-------|-------|----------------|--------|--------|-------|-------|-------|
| scaffold01528 | 6642  | 9638  | 2997  | 14.18 | C_unshiu_00357 | 200995 | 198002 | 2994  | 1.26  | 99.07 |
| scaffold01528 | 13127 | 15037 | 1911  | 9.04  | C_unshiu_01064 | 30399  | 32309  | 1911  | 1.93  | 100   |
| scaffold01528 | 13132 | 17298 | 4167  | 19.72 | C_unshiu_00872 | 53953  | 58119  | 4167  | 3.47  | 100   |
| scaffold01529 | 1     | 1043  | 1043  | 4.94  | C_unshiu_00029 | 712664 | 711624 | 1041  | 0.15  | 99.23 |
| scaffold01530 | 7666  | 12110 | 4445  | 21.06 | C_unshiu_00928 | 52071  | 56468  | 4398  | 3.86  | 98.22 |
| scaffold01533 | 3914  | 4944  | 1031  | 4.91  | C_unshiu_00795 | 116011 | 114981 | 1031  | 0.8   | 100   |
| scaffold01533 | 6672  | 7880  | 1209  | 5.76  | C_unshiu_00795 | 112716 | 111508 | 1209  | 0.94  | 99.42 |
| scaffold01533 | 7970  | 13250 | 5281  | 25.15 | C_unshiu_00795 | 111405 | 106125 | 5281  | 4.1   | 99.94 |
| scaffold01533 | 19490 | 20909 | 1420  | 6.76  | C_unshiu_00795 | 100140 | 98721  | 1420  | 1.1   | 100   |
| scaffold01534 | 523   | 2103  | 1581  | 7.53  | C_unshiu_02444 | 13734  | 15313  | 1580  | 6     | 99.62 |
| scaffold01534 | 4575  | 12949 | 8375  | 39.89 | C_unshiu_00081 | 443535 | 451909 | 8375  | 1.75  | 99.98 |
| scaffold01534 | 16982 | 19758 | 2777  | 13.23 | C_unshiu_01690 | 11211  | 13987  | 2777  | 5.24  | 100   |
| scaffold01535 | 4798  | 18172 | 13375 | 63.86 | C_unshiu_00934 | 1      | 13374  | 13374 | 11.82 | 99.95 |
| scaffold01536 | 3831  | 4936  | 1106  | 5.28  | C_unshiu_00230 | 98244  | 97139  | 1106  | 0.36  | 100   |
| scaffold01537 | 1     | 1334  | 1334  | 6.38  | C_unshiu_00373 | 148250 | 149583 | 1334  | 0.58  | 100   |
| scaffold01538 | 14194 | 18309 | 4116  | 19.69 | C_unshiu_00393 | 176076 | 180191 | 4116  | 1.83  | 99.98 |
| scaffold01538 | 19464 | 20908 | 1445  | 6.91  | C_unshiu_02683 | 10543  | 11987  | 1445  | 7.14  | 100   |
| scaffold01539 | 261   | 1984  | 1724  | 8.28  | C_unshiu_02458 | 6286   | 8008   | 1723  | 6.65  | 98.72 |
| scaffold01539 | 11929 | 14248 | 2320  | 11.14 | C_unshiu_00149 | 161898 | 164217 | 2320  | 0.6   | 100   |
| scaffold01539 | 14249 | 16300 | 2052  | 9.86  | C_unshiu_00916 | 79705  | 77654  | 2052  | 1.78  | 100   |
| scaffold01539 | 19814 | 20820 | 1007  | 4.84  | C_unshiu_00149 | 170930 | 171941 | 1012  | 0.26  | 99.51 |
| scaffold01540 | 1     | 1149  | 1149  | 5.52  | C_unshiu_01481 | 40201  | 41349  | 1149  | 1.78  | 99.74 |
| scaffold01540 | 10374 | 13410 | 3037  | 14.6  | C_unshiu_00528 | 24633  | 27655  | 3023  | 1.64  | 98.59 |
| scaffold01541 | 8469  | 9551  | 1083  | 5.21  | C_unshiu_02234 | 19954  | 18872  | 1083  | 3.37  | 98.98 |
| scaffold01541 | 10256 | 11292 | 1037  | 4.98  | C_unshiu_00285 | 9709   | 10745  | 1037  | 0.38  | 99.71 |
| scaffold01541 | 11290 | 12913 | 1624  | 7.81  | C_unshiu_02234 | 17206  | 15582  | 1625  | 5.06  | 99.38 |
| scaffold01541 | 14494 | 16146 | 1653  | 7.95  | C_unshiu_02234 | 14280  | 12631  | 1650  | 5.14  | 99.58 |
| scaffold01541 | 16169 | 19737 | 3569  | 17.15 | C_unshiu_00839 | 24115  | 20547  | 3569  | 2.88  | 99.3  |
| scaffold01541 | 19745 | 20805 | 1061  | 5.1   | C_unshiu_01276 | 20249  | 21309  | 1061  | 1.34  | 100   |
| scaffold01542 | 1     | 1378  | 1378  | 6.63  | C_unshiu_01000 | 16683  | 18060  | 1378  | 1.3   | 99.78 |
| scaffold01542 | 4336  | 5515  | 1180  | 5.68  | C_unshiu_00740 | 68969  | 70150  | 1182  | 0.86  | 99.58 |
| scaffold01542 | 8946  | 10804 | 1859  | 8.94  | C_unshiu_00740 | 74318  | 76170  | 1853  | 1.35  | 98.33 |
| scaffold01542 | 15567 | 16924 | 1358  | 6.53  | C_unshiu_01000 | 28051  | 29408  | 1358  | 1.28  | 99.93 |
| scaffold01543 | 5648  | 7456  | 1809  | 8.71  | C_unshiu_00202 | 71495  | 69686  | 1810  | 0.54  | 98.41 |
| scaffold01543 | 8270  | 20767 | 12498 | 60.18 | C_unshiu_00202 | 69934  | 57398  | 12537 | 3.74  | 98.45 |
| scaffold01545 | 3368  | 6066  | 2699  | 12.99 | C_unshiu_00690 | 13199  | 15902  | 2704  | 1.86  | 99.04 |
| scaffold01546 | 6355  | 9067  | 2713  | 13.07 | C_unshiu_00514 | 5995   | 8708   | 2714  | 1.45  | 99.82 |
| scaffold01547 | 1     | 1670  | 1670  | 8.04  | C_unshiu_00325 | 11872  | 13548  | 1677  | 0.66  | 99.52 |
| scaffold01547 | 1662  | 6113  | 4452  | 21.44 | C_unshiu_01488 | 25413  | 29864  | 4452  | 6.98  | 100   |
| scaffold01547 | 19728 | 20762 | 1035  | 4.98  | C_unshiu_00325 | 34131  | 35175  | 1045  | 0.41  | 98.47 |
| scaffold01549 | 1234  | 2291  | 1058  | 5.11  | C_unshiu_00581 | 83271  | 84328  | 1058  | 0.62  | 99.15 |
| scaffold01549 | 4566  | 9152  | 4587  | 22.16 | C_unshiu_00581 | 86806  | 91374  | 4569  | 2.67  | 98.11 |
| scaffold01550 | 7170  | 9074  | 1905  | 9.19  | C_unshiu_00344 | 156120 | 154213 | 1908  | 0.77  | 99.37 |
| scaffold01550 | 14469 | 15772 | 1304  | 6.29  | C_unshiu_00226 | 64494  | 65801  | 1308  | 0.42  | 99.62 |
| scaffold01552 | 9282  | 14957 | 5676  | 27.46 | C_unshiu_01594 | 33032  | 27357  | 5676  | 9.83  | 99.98 |
| scaffold01552 | 15098 | 18647 | 3550  | 17.17 | C_unshiu_00065 | 351864 | 355418 | 3555  | 0.64  | 99.24 |
| scaffold01553 | 1947  | 5243  | 3297  | 15.99 | C_unshiu_00344 | 118293 | 114997 | 3297  | 1.33  | 99.7  |
| scaffold01553 | 14406 | 15494 | 1089  | 5.28  | C_unshiu_00114 | 362341 | 361261 | 1081  | 0.25  | 98.35 |
| scaffold01553 | 15494 | 16542 | 1049  | 5.09  | C_unshiu_01229 | 40242  | 39193  | 1050  | 1.27  | 99.81 |
| scaffold01554 | 10012 | 18244 | 8233  | 40.09 | C_unshiu_02773 | 5808   | 14018  | 8211  | 44.32 | 98.66 |
| scaffold01554 | 18240 | 20226 | 1987  | 9.68  | C_unshiu_01608 | 12167  | 10181  | 1987  | 3.48  | 99.95 |
| scaffold01555 | 4856  | 7165  | 2310  | 11.25 | C_unshiu_01000 | 2315   | 1      | 2315  | 2.18  | 99.31 |
| scaffold01556 | 4679  | 20535 | 15857 | 77.22 | C_unshiu_02432 | 24110  | 8237   | 15874 | 59.51 | 99.53 |
| scaffold01557 | 1     | 1540  | 1540  | 7.53  | C_unshiu_00523 | 123042 | 121484 | 1559  | 0.84  | 98.27 |
| scaffold01557 | 19141 | 20443 | 1303  | 6.37  | C_unshiu_00523 | 104092 | 102770 | 1323  | 0.71  | 98.26 |
| scaffold01558 | 1     | 18286 | 18286 | 89.77 | C_unshiu_01724 | 31351  | 13115  | 18237 | 35.23 | 99.52 |
| scaffold01559 | 16965 | 20373 | 3409  | 16.73 | C_unshiu_02103 | 18239  | 14826  | 3414  | 9.38  | 99.41 |
| scaffold01560 | 3153  | 7840  | 4688  | 23.08 | C_unshiu_00069 | 204912 | 200241 | 4672  | 0.89  | 98.03 |
| scaffold01560 | 8278  | 14640 | 6363  | 31.32 | C_unshiu_00069 | 199286 | 192938 | 6349  | 1.21  | 98.67 |
| scaffold01560 | 15034 | 16655 | 1622  | 7.98  | C_unshiu_00069 | 192912 | 191292 | 1621  | 0.31  | 99.38 |
| scaffold01562 | 1     | 1493  | 1493  | 7.36  | C_unshiu_00456 | 119958 | 121450 | 1493  | 0.73  | 100   |
| scaffold01562 | 1486  | 3751  | 2266  | 11.17 | C_unshiu_00724 | 108011 | 110276 | 2266  | 1.62  | 100   |
| scaffold01562 | 3753  | 9682  | 5930  | 29.24 | C_unshiu_00456 | 124216 | 130145 | 5930  | 2.89  | 99.7  |
| scaffold01562 | 9680  | 16907 | 7228  | 35.64 | C_unshiu_01474 | 49340  | 56567  | 7228  | 11.14 | 100   |
| scaffold01562 | 9683  | 16911 | 7229  | 35.64 | C_unshiu_00368 | 15128  | 7900   | 7229  | 3.1   | 100   |
| scaffold01563 | 9462  | 16184 | 6723  | 33.16 | C_unshiu_01191 | 46629  | 53351  | 6723  | 7.79  | 100   |
| scaffold01564 | 5084  | 6206  | 1123  | 5.54  | C_unshiu_00934 | 57829  | 58951  | 1123  | 0.99  | 100   |
| scaffold01565 | 3462  | 8565  | 5104  | 25.2  | C_unshiu_00673 | 129017 | 123914 | 5104  | 3.39  | 100   |
| scaffold01565 | 4987  | 8677  | 3691  | 18.22 | C_unshiu_00144 | 305596 | 309286 | 3691  | 0.93  | 100   |
| scaffold01565 | 13165 | 15230 | 2066  | 10.2  | C_unshiu_00771 | 29036  | 26971  | 2066  | 1.56  | 100   |
| scaffold01566 | 1     | 2667  | 2667  | 13.18 | C_unshiu_00221 | 127844 | 130509 | 2666  | 0.85  | 99.7  |
| scaffold01566 | 5600  | 7190  | 1591  | 7.86  | C_unshiu_00221 | 145401 | 147000 | 1600  | 0.51  | 99    |
| scaffold01566 | 11762 | 14167 | 2406  | 11.89 | C_unshiu_01623 | 13865  | 16270  | 2406  | 4.26  | 100   |
| scaffold01566 | 12991 | 14174 | 1184  | 5.85  | C_unshiu_01087 | 16356  | 17539  | 1184  | 1.22  | 100   |
| scaffold01567 | 17643 | 19331 | 1689  | 8.36  | C_unshiu_00005 | 1      | 1686   | 1686  | 0.15  | 98.76 |
| scaffold01568 | 5757  | 7132  | 1376  | 6.83  | C_unshiu_03079 | 8052   | 9428   | 1377  | 13.69 | 99.42 |
| scaffold01568 | 17477 | 20158 | 2682  | 13.3  | C_unshiu_01626 | 4386   | 1702   | 2685  | 4.78  | 98.3  |
| scaffold01569 | 3473  | 4882  | 1410  | 7     | C_unshiu_01145 | 59807  | 58398  | 1410  | 1.54  | 99.93 |
| scaffold01569 | 10089 | 12837 | 2749  | 13.64 | C_unshiu_01145 | 54634  | 51897  | 2738  | 3     | 98.47 |

|               |       |       |       |       |                |         |         |       |       |       |
|---------------|-------|-------|-------|-------|----------------|---------|---------|-------|-------|-------|
| scaffold01570 | 1     | 5139  | 5139  | 25.56 | C_unshiu_00894 | 3163    | 8261    | 5099  | 4.33  | 99.05 |
| scaffold01570 | 5442  | 17661 | 12220 | 60.78 | C_unshiu_00894 | 8482    | 20554   | 12073 | 10.26 | 98.32 |
| scaffold01570 | 17655 | 18788 | 1134  | 5.64  | C_unshiu_00399 | 26977   | 25844   | 1134  | 0.51  | 100   |
| scaffold01571 | 1     | 4584  | 4584  | 22.79 | C_unshiu_00475 | 200498  | 195915  | 4584  | 2.28  | 100   |
| scaffold01571 | 17278 | 20114 | 2837  | 14.1  | C_unshiu_00267 | 56519   | 53710   | 2810  | 0.99  | 98.84 |
| scaffold01572 | 16303 | 18549 | 2247  | 11.18 | C_unshiu_00157 | 118788  | 121034  | 2247  | 0.6   | 100   |
| scaffold01573 | 5732  | 12661 | 6930  | 34.51 | C_unshiu_01906 | 17219   | 10280   | 6940  | 15.65 | 98.27 |
| scaffold01573 | 14289 | 16426 | 2138  | 10.65 | C_unshiu_01906 | 7325    | 5188    | 2138  | 4.82  | 98.32 |
| scaffold01573 | 17079 | 18188 | 1110  | 5.53  | C_unshiu_00114 | 420210  | 419101  | 1110  | 0.26  | 100   |
| scaffold01573 | 18184 | 19290 | 1107  | 5.51  | C_unshiu_00114 | 419170  | 418064  | 1107  | 0.26  | 100   |
| scaffold01574 | 1     | 1392  | 1392  | 6.94  | C_unshiu_00008 | 1059995 | 1061386 | 1392  | 0.13  | 98.92 |
| scaffold01574 | 1393  | 4283  | 2891  | 14.42 | C_unshiu_01474 | 52227   | 49337   | 2891  | 4.46  | 100   |
| scaffold01574 | 9554  | 18619 | 9066  | 45.21 | C_unshiu_01599 | 1       | 9050    | 9050  | 15.74 | 99.25 |
| scaffold01575 | 190   | 9681  | 9492  | 47.24 | C_unshiu_00186 | 16571   | 7084    | 9488  | 2.74  | 99.49 |
| scaffold01575 | 11128 | 20092 | 8965  | 44.62 | C_unshiu_00186 | 29966   | 20975   | 8992  | 2.6   | 99.18 |
| scaffold01576 | 11206 | 13107 | 1902  | 9.51  | C_unshiu_00183 | 290931  | 289018  | 1914  | 0.54  | 98.38 |
| scaffold01576 | 13108 | 18396 | 5289  | 26.46 | C_unshiu_00414 | 23043   | 28331   | 5289  | 2.4   | 99.98 |
| scaffold01577 | 1     | 1571  | 1571  | 5.87  | C_unshiu_00028 | 484522  | 486094  | 1573  | 0.22  | 99.87 |
| scaffold01577 | 1592  | 3069  | 1478  | 7.41  | C_unshiu_00028 | 483086  | 484568  | 1483  | 0.21  | 98.79 |
| scaffold01577 | 5810  | 7037  | 1228  | 6.15  | C_unshiu_00028 | 485996  | 487225  | 1230  | 0.17  | 98.78 |
| scaffold01577 | 8871  | 11646 | 2776  | 13.91 | C_unshiu_00028 | 489918  | 492698  | 2781  | 0.39  | 99.39 |
| scaffold01578 | 361   | 2617  | 2257  | 11.33 | C_unshiu_02725 | 6816    | 9082    | 2267  | 11.72 | 98.33 |
| scaffold01579 | 1569  | 13095 | 11527 | 57.87 | C_unshiu_01269 | 11494   | 1       | 11494 | 14.45 | 98.99 |
| scaffold01580 | 5384  | 15901 | 10518 | 52.83 | C_unshiu_01026 | 8168    | 18701   | 10534 | 10.2  | 98.8  |
| scaffold01581 | 5642  | 12866 | 7225  | 36.31 | C_unshiu_00298 | 164087  | 171314  | 7228  | 2.71  | 99.31 |
| scaffold01581 | 13142 | 14372 | 1231  | 6.19  | C_unshiu_00298 | 171867  | 173097  | 1231  | 0.46  | 99.19 |
| scaffold01582 | 4550  | 6595  | 2046  | 10.29 | C_unshiu_00131 | 75335   | 77388   | 2054  | 0.5   | 98.64 |
| scaffold01582 | 6843  | 10381 | 3539  | 17.79 | C_unshiu_00131 | 78232   | 81774   | 3543  | 0.86  | 99.58 |
| scaffold01583 | 11398 | 12842 | 1445  | 7.26  | C_unshiu_00008 | 248391  | 249841  | 1451  | 0.13  | 98.48 |
| scaffold01584 | 3194  | 12577 | 9384  | 47.23 | C_unshiu_00227 | 186821  | 196207  | 9387  | 3.03  | 99.68 |
| scaffold01585 | 2190  | 5425  | 3236  | 16.31 | C_unshiu_02238 | 20082   | 16846   | 3237  | 10.09 | 99.88 |
| scaffold01585 | 5569  | 13989 | 8421  | 42.44 | C_unshiu_02238 | 16618   | 8188    | 8431  | 26.29 | 99.85 |
| scaffold01586 | 517   | 1807  | 1291  | 6.52  | C_unshiu_01223 | 51093   | 49803   | 1291  | 1.55  | 100   |
| scaffold01587 | 3     | 6895  | 6893  | 34.87 | C_unshiu_03020 | 7489    | 599     | 6891  | 55.73 | 98.6  |
| scaffold01588 | 17300 | 19655 | 2356  | 11.99 | C_unshiu_00926 | 27557   | 29885   | 2329  | 2.04  | 98.68 |
| scaffold01589 | 1     | 2242  | 2242  | 11.41 | C_unshiu_01778 | 13303   | 11062   | 2242  | 4.54  | 99.91 |
| scaffold01589 | 4995  | 6879  | 1885  | 9.59  | C_unshiu_01778 | 8205    | 6321    | 1885  | 3.82  | 99.68 |
| scaffold01589 | 12229 | 13294 | 1066  | 5.43  | C_unshiu_01778 | 1073    | 1       | 1073  | 2.17  | 99.07 |
| scaffold01589 | 13922 | 15515 | 1594  | 8.11  | C_unshiu_00247 | 224886  | 226479  | 1594  | 0.54  | 100   |
| scaffold01589 | 17277 | 19648 | 2372  | 12.07 | C_unshiu_02126 | 33924   | 31574   | 2351  | 6.57  | 98.32 |
| scaffold01590 | 4918  | 8504  | 3587  | 18.26 | C_unshiu_00607 | 134195  | 137781  | 3587  | 2.17  | 100   |
| scaffold01590 | 7074  | 8556  | 1483  | 7.55  | C_unshiu_00128 | 353785  | 352303  | 1483  | 0.36  | 100   |
| scaffold01590 | 12497 | 13893 | 1397  | 7.11  | C_unshiu_01480 | 44550   | 45946   | 1397  | 2.17  | 99.21 |
| scaffold01590 | 17312 | 19642 | 2331  | 11.87 | C_unshiu_00924 | 85569   | 83254   | 2316  | 2.02  | 98.37 |
| scaffold01591 | 15760 | 19569 | 3810  | 19.47 | C_unshiu_00053 | 104395  | 108257  | 3863  | 0.65  | 98.45 |
| scaffold01592 | 1     | 4329  | 4329  | 22.12 | C_unshiu_00464 | 112666  | 117004  | 4339  | 2.13  | 98.58 |
| scaffold01592 | 4346  | 14928 | 10583 | 54.07 | C_unshiu_00464 | 117396  | 127932  | 10537 | 5.18  | 99.1  |
| scaffold01593 | 2811  | 5720  | 2910  | 14.87 | C_unshiu_01843 | 5207    | 8112    | 2906  | 6.21  | 98.77 |
| scaffold01593 | 7857  | 9124  | 1268  | 6.48  | C_unshiu_00309 | 217780  | 216513  | 1268  | 0.49  | 100   |
| scaffold01593 | 9125  | 12878 | 3754  | 19.18 | C_unshiu_01843 | 12293   | 16046   | 3754  | 8.02  | 100   |
| scaffold01593 | 13035 | 19568 | 6534  | 33.39 | C_unshiu_01843 | 16427   | 22986   | 6560  | 14.02 | 98.8  |
| scaffold01594 | 18048 | 19547 | 1500  | 7.67  | C_unshiu_00571 | 94411   | 95915   | 1505  | 0.87  | 99.53 |
| scaffold01595 | 2268  | 3621  | 1354  | 6.93  | C_unshiu_00675 | 9682    | 8327    | 1356  | 0.9   | 99.12 |
| scaffold01596 | 1     | 1416  | 1416  | 7.25  | C_unshiu_00777 | 26875   | 28291   | 1417  | 1.08  | 99.51 |
| scaffold01596 | 1     | 1416  | 1416  | 7.25  | C_unshiu_03104 | 4816    | 3401    | 1416  | 15.34 | 99.86 |
| scaffold01596 | 2718  | 4317  | 1600  | 8.19  | C_unshiu_00269 | 95199   | 93600   | 1600  | 0.57  | 99.31 |
| scaffold01596 | 5108  | 14502 | 9395  | 48.12 | C_unshiu_00269 | 92411   | 83017   | 9395  | 3.33  | 98.73 |
| scaffold01596 | 9892  | 14502 | 4611  | 23.61 | C_unshiu_00777 | 37570   | 42191   | 4622  | 3.52  | 99.16 |
| scaffold01596 | 16154 | 17208 | 1055  | 5.4   | C_unshiu_01646 | 23183   | 22129   | 1055  | 1.91  | 100   |
| scaffold01596 | 17209 | 19526 | 2318  | 11.87 | C_unshiu_00777 | 42314   | 44632   | 2319  | 1.76  | 99.78 |
| scaffold01597 | 4027  | 6232  | 2206  | 11.32 | C_unshiu_00001 | 2444992 | 2442791 | 2202  | 0.08  | 99.55 |
| scaffold01597 | 7247  | 8329  | 1083  | 5.56  | C_unshiu_00680 | 30722   | 29640   | 1083  | 0.73  | 99.08 |
| scaffold01597 | 8328  | 12674 | 4347  | 22.31 | C_unshiu_02263 | 8568    | 4221    | 4348  | 13.98 | 99.36 |
| scaffold01600 | 955   | 1976  | 1022  | 5.26  | C_unshiu_00146 | 382487  | 383509  | 1023  | 0.26  | 98.92 |
| scaffold01600 | 17854 | 19192 | 1339  | 6.89  | C_unshiu_02334 | 28816   | 27479   | 1338  | 4.64  | 99.55 |
| scaffold01602 | 5977  | 16683 | 10707 | 55.36 | C_unshiu_00542 | 67027   | 56324   | 10704 | 5.96  | 99.93 |
| scaffold01603 | 1     | 3948  | 3948  | 20.39 | C_unshiu_00034 | 9877    | 5947    | 3931  | 0.56  | 99.04 |
| scaffold01603 | 13396 | 18100 | 4705  | 24.3  | C_unshiu_01938 | 37854   | 33147   | 4708  | 10.88 | 99.64 |
| scaffold01605 | 12959 | 18732 | 5774  | 29.9  | C_unshiu_02289 | 16494   | 22271   | 5778  | 19.17 | 99.67 |
| scaffold01606 | 1     | 6374  | 6374  | 33.07 | C_unshiu_00351 | 77474   | 83850   | 6377  | 2.65  | 99.87 |
| scaffold01606 | 6512  | 17324 | 10813 | 56.1  | C_unshiu_00351 | 83868   | 94709   | 10842 | 4.51  | 99.56 |
| scaffold01607 | 1176  | 16476 | 15301 | 79.39 | C_unshiu_00938 | 112443  | 97123   | 15321 | 13.57 | 99.33 |
| scaffold01608 | 13795 | 19261 | 5467  | 28.38 | C_unshiu_00736 | 47677   | 42241   | 5437  | 3.94  | 98.38 |
| scaffold01609 | 49    | 1746  | 1698  | 8.84  | C_unshiu_02515 | 6855    | 5156    | 1700  | 7.03  | 99.18 |
| scaffold01609 | 3475  | 9456  | 5982  | 31.15 | C_unshiu_00528 | 102458  | 108445  | 5988  | 3.25  | 98.5  |
| scaffold01609 | 10084 | 12748 | 2665  | 13.88 | C_unshiu_00528 | 110208  | 112873  | 2666  | 1.45  | 99.17 |
| scaffold01609 | 14923 | 16110 | 1188  | 6.19  | C_unshiu_00528 | 114300  | 115486  | 1187  | 0.64  | 99.92 |
| scaffold01610 | 2256  | 5539  | 3284  | 17.11 | C_unshiu_03118 | 5773    | 2490    | 3284  | 38.41 | 99.3  |
| scaffold01610 | 5599  | 7977  | 2379  | 12.39 | C_unshiu_03118 | 2382    | 1       | 2382  | 27.86 | 98.7  |

|               |       |       |       |       |                |        |        |       |       |       |
|---------------|-------|-------|-------|-------|----------------|--------|--------|-------|-------|-------|
| scaffold01611 | 3298  | 5470  | 2173  | 11.37 | C_unshiu_01959 | 29872  | 32044  | 2173  | 5.12  | 99.45 |
| scaffold01612 | 9212  | 10762 | 1551  | 8.12  | C_unshiu_00333 | 160504 | 162049 | 1546  | 0.62  | 98.33 |
| scaffold01612 | 13470 | 15612 | 2143  | 11.22 | C_unshiu_00620 | 32577  | 30435  | 2143  | 1.31  | 100   |
| scaffold01612 | 15610 | 17597 | 1988  | 10.41 | C_unshiu_00333 | 167580 | 169548 | 1969  | 0.78  | 98.59 |
| scaffold01613 | 1     | 6389  | 6389  | 33.52 | C_unshiu_01137 | 7940   | 14330  | 6391  | 6.93  | 99.44 |
| scaffold01614 | 10281 | 11825 | 1545  | 8.11  | C_unshiu_00769 | 32573  | 34118  | 1546  | 1.16  | 99.48 |
| scaffold01615 | 1     | 1098  | 1098  | 5.77  | C_unshiu_00044 | 96944  | 95846  | 1099  | 0.17  | 99.27 |
| scaffold01615 | 2723  | 4747  | 2025  | 10.64 | C_unshiu_02241 | 4716   | 6727   | 2012  | 6.29  | 98.42 |
| scaffold01615 | 2760  | 6762  | 4003  | 21.03 | C_unshiu_00044 | 95967  | 91954  | 4014  | 0.63  | 98.78 |
| scaffold01615 | 17710 | 19032 | 1323  | 6.95  | C_unshiu_00044 | 80799  | 79477  | 1323  | 0.21  | 99.85 |
| scaffold01616 | 1     | 3600  | 3600  | 18.92 | C_unshiu_02713 | 16256  | 12660  | 3597  | 18.29 | 99.08 |
| scaffold01616 | 4177  | 8850  | 4674  | 24.57 | C_unshiu_02002 | 22847  | 18202  | 4646  | 11.46 | 99.36 |
| scaffold01616 | 9919  | 11199 | 1281  | 6.73  | C_unshiu_02002 | 16821  | 15541  | 1281  | 3.16  | 100   |
| scaffold01616 | 12414 | 13884 | 1471  | 7.73  | C_unshiu_02002 | 14315  | 12845  | 1471  | 3.63  | 99.52 |
| scaffold01616 | 15377 | 19025 | 3649  | 19.18 | C_unshiu_02002 | 10867  | 7201   | 3667  | 9.05  | 99.48 |
| scaffold01617 | 7087  | 9258  | 2172  | 11.42 | C_unshiu_00341 | 240051 | 242226 | 2176  | 0.87  | 99.45 |
| scaffold01617 | 9993  | 11420 | 1428  | 7.51  | C_unshiu_00341 | 243637 | 245072 | 1436  | 0.58  | 98.54 |
| scaffold01618 | 1     | 1788  | 1788  | 9.4   | C_unshiu_00183 | 69850  | 68063  | 1788  | 0.51  | 99.16 |
| scaffold01618 | 1780  | 3462  | 1683  | 8.85  | C_unshiu_00974 | 57504  | 55822  | 1683  | 1.54  | 100   |
| scaffold01619 | 13317 | 15477 | 2161  | 11.39 | C_unshiu_00617 | 30490  | 28330  | 2161  | 1.32  | 98.8  |
| scaffold01620 | 1134  | 3508  | 2375  | 12.55 | C_unshiu_02127 | 2529   | 4904   | 2376  | 6.65  | 99.66 |
| scaffold01620 | 3513  | 18487 | 14975 | 79.12 | C_unshiu_00187 | 330977 | 345959 | 14983 | 4.33  | 98.86 |
| scaffold01621 | 4540  | 7232  | 2693  | 14.22 | C_unshiu_00601 | 61828  | 64519  | 2692  | 1.61  | 98.11 |
| scaffold01622 | 13018 | 15759 | 2742  | 14.48 | C_unshiu_00865 | 115914 | 113178 | 2737  | 2.26  | 98    |
| scaffold01623 | 1     | 18928 | 18928 | 99.98 | C_unshiu_01395 | 46836  | 65654  | 18819 | 26.64 | 98.69 |
| scaffold01624 | 6771  | 8231  | 1461  | 7.73  | C_unshiu_00626 | 36376  | 37823  | 1448  | 0.9   | 98.91 |
| scaffold01624 | 10612 | 12788 | 2177  | 11.52 | C_unshiu_00626 | 32042  | 29866  | 2177  | 1.35  | 100   |
| scaffold01624 | 13297 | 18901 | 5605  | 29.65 | C_unshiu_00626 | 29710  | 24095  | 5616  | 3.47  | 99.61 |
| scaffold01625 | 16500 | 17658 | 1159  | 6.13  | C_unshiu_00849 | 52368  | 53526  | 1159  | 0.94  | 98.96 |
| scaffold01626 | 4165  | 6095  | 1931  | 10.22 | C_unshiu_01131 | 81144  | 83074  | 1931  | 2.08  | 100   |
| scaffold01626 | 6745  | 8139  | 1395  | 7.38  | C_unshiu_00707 | 23878  | 25272  | 1395  | 0.98  | 99.71 |
| scaffold01626 | 10433 | 11509 | 1077  | 5.7   | C_unshiu_00151 | 347571 | 348648 | 1078  | 0.28  | 99.91 |
| scaffold01626 | 13849 | 15647 | 1799  | 9.52  | C_unshiu_00323 | 108083 | 109881 | 1799  | 0.71  | 100   |
| scaffold01626 | 15639 | 18896 | 3258  | 17.24 | C_unshiu_00151 | 354519 | 357776 | 3258  | 0.84  | 100   |
| scaffold01627 | 6     | 5741  | 5736  | 30.49 | C_unshiu_00114 | 316642 | 322378 | 5737  | 1.32  | 99.44 |
| scaffold01627 | 10560 | 12785 | 2226  | 11.83 | C_unshiu_00114 | 327656 | 329890 | 2235  | 0.51  | 99.33 |
| scaffold01628 | 5267  | 9714  | 4448  | 23.69 | C_unshiu_00460 | 133397 | 137863 | 4467  | 2.18  | 98.06 |
| scaffold01628 | 13562 | 15713 | 2152  | 11.46 | C_unshiu_00460 | 142300 | 144451 | 2152  | 1.05  | 100   |
| scaffold01629 | 9087  | 10264 | 1178  | 6.28  | C_unshiu_00028 | 140879 | 142060 | 1182  | 0.16  | 98.9  |
| scaffold01630 | 1910  | 16635 | 14726 | 78.54 | C_unshiu_00948 | 38424  | 23687  | 14738 | 13.19 | 99.48 |
| scaffold01630 | 17648 | 18750 | 1103  | 5.88  | C_unshiu_00948 | 20723  | 19621  | 1103  | 0.99  | 100   |
| scaffold01632 | 1     | 1303  | 1303  | 6.96  | C_unshiu_00017 | 10928  | 9626   | 1303  | 0.15  | 100   |
| scaffold01633 | 1     | 8826  | 8826  | 47.22 | C_unshiu_00178 | 246669 | 255508 | 8840  | 2.45  | 99.46 |
| scaffold01633 | 10186 | 11613 | 1428  | 7.64  | C_unshiu_00178 | 257265 | 258692 | 1428  | 0.4   | 100   |
| scaffold01633 | 11619 | 13288 | 1670  | 8.94  | C_unshiu_00106 | 350577 | 348908 | 1670  | 0.37  | 100   |
| scaffold01633 | 14388 | 18690 | 4303  | 23.02 | C_unshiu_00044 | 8176   | 12478  | 4303  | 0.67  | 98.47 |
| scaffold01634 | 5744  | 7823  | 2080  | 11.15 | C_unshiu_01516 | 50585  | 52668  | 2084  | 3.34  | 98.37 |
| scaffold01634 | 13828 | 16128 | 2301  | 12.33 | C_unshiu_01516 | 55280  | 57589  | 2310  | 3.7   | 99.18 |
| scaffold01636 | 5751  | 8601  | 2851  | 15.32 | C_unshiu_02553 | 6167   | 3318   | 2850  | 12.31 | 99.47 |
| scaffold01636 | 8696  | 10265 | 1570  | 8.44  | C_unshiu_02553 | 3219   | 1650   | 1570  | 6.78  | 100   |
| scaffold01636 | 10275 | 11913 | 1639  | 8.81  | C_unshiu_00362 | 159650 | 161302 | 1653  | 0.7   | 98.19 |
| scaffold01637 | 1     | 6055  | 6055  | 32.58 | C_unshiu_00437 | 82040  | 88144  | 6105  | 2.87  | 98.02 |
| scaffold01637 | 11773 | 14039 | 2267  | 12.2  | C_unshiu_00437 | 93260  | 95526  | 2267  | 1.07  | 100   |
| scaffold01637 | 14508 | 15562 | 1055  | 5.68  | C_unshiu_00437 | 97095  | 98151  | 1057  | 0.5   | 99.72 |
| scaffold01638 | 2015  | 16076 | 14062 | 75.73 | C_unshiu_00896 | 22666  | 8701   | 13966 | 11.87 | 98.8  |
| scaffold01640 | 1     | 1020  | 1020  | 5.51  | C_unshiu_00526 | 165401 | 164382 | 1020  | 0.55  | 99.31 |
| scaffold01640 | 1021  | 2240  | 1220  | 6.59  | C_unshiu_00526 | 166574 | 165355 | 1220  | 0.66  | 100   |
| scaffold01640 | 3699  | 5176  | 1478  | 7.98  | C_unshiu_03119 | 6159   | 4682   | 1478  | 17.52 | 99.86 |
| scaffold01640 | 5196  | 8783  | 3588  | 19.37 | C_unshiu_03119 | 3586   | 7      | 3580  | 42.44 | 99.72 |
| scaffold01640 | 16961 | 17962 | 1002  | 5.41  | C_unshiu_02891 | 5206   | 4205   | 1002  | 6.28  | 100   |
| scaffold01641 | 1621  | 5703  | 4083  | 22.06 | C_unshiu_01656 | 7631   | 3548   | 4084  | 7.42  | 99.9  |
| scaffold01642 | 2969  | 4094  | 1126  | 6.09  | C_unshiu_00925 | 100600 | 99475  | 1126  | 0.99  | 100   |
| scaffold01642 | 16499 | 18497 | 1999  | 10.81 | C_unshiu_00779 | 3482   | 1481   | 2002  | 1.53  | 98.75 |
| scaffold01644 | 1     | 1143  | 1143  | 6.19  | C_unshiu_01081 | 68452  | 69594  | 1143  | 1.17  | 99.56 |
| scaffold01645 | 952   | 2677  | 1726  | 9.35  | C_unshiu_00344 | 195963 | 197688 | 1726  | 0.7   | 99.59 |
| scaffold01645 | 3572  | 16471 | 12900 | 69.87 | C_unshiu_00344 | 198991 | 211859 | 12869 | 5.19  | 98.92 |
| scaffold01646 | 1157  | 5578  | 4422  | 24.01 | C_unshiu_02497 | 24630  | 20227  | 4404  | 17.88 | 99.32 |
| scaffold01646 | 7368  | 12616 | 5249  | 28.49 | C_unshiu_02497 | 18381  | 13153  | 5229  | 21.23 | 98.88 |
| scaffold01646 | 11208 | 16107 | 4900  | 26.6  | C_unshiu_00737 | 10295  | 5402   | 4894  | 3.54  | 99.37 |
| scaffold01647 | 2858  | 4679  | 1822  | 9.89  | C_unshiu_01201 | 63809  | 65632  | 1824  | 2.13  | 99.56 |
| scaffold01647 | 4783  | 5811  | 1029  | 5.58  | C_unshiu_01201 | 65759  | 66788  | 1030  | 1.2   | 99.32 |
| scaffold01647 | 6420  | 18429 | 12010 | 65.17 | C_unshiu_01201 | 67759  | 79770  | 12012 | 14.03 | 99.98 |
| scaffold01649 | 1     | 2464  | 2464  | 13.49 | C_unshiu_01398 | 18193  | 20644  | 2452  | 3.48  | 99.27 |
| scaffold01649 | 7484  | 8739  | 1256  | 6.88  | C_unshiu_01398 | 28381  | 29636  | 1256  | 1.78  | 99.76 |
| scaffold01649 | 12935 | 18265 | 5331  | 29.19 | C_unshiu_01398 | 32741  | 38067  | 5327  | 7.56  | 99.55 |
| scaffold01650 | 4783  | 6761  | 1979  | 10.84 | C_unshiu_00757 | 49198  | 47220  | 1979  | 1.47  | 100   |
| scaffold01650 | 8803  | 11031 | 2229  | 12.21 | C_unshiu_00757 | 44901  | 42669  | 2233  | 1.65  | 99.46 |
| scaffold01651 | 6045  | 15358 | 9314  | 51.06 | C_unshiu_00188 | 75841  | 85154  | 9314  | 2.7   | 100   |
| scaffold01651 | 15454 | 18240 | 2787  | 15.28 | C_unshiu_00188 | 85462  | 88248  | 2787  | 0.81  | 100   |

|               |       |       |       |       |                |        |        |       |       |       |
|---------------|-------|-------|-------|-------|----------------|--------|--------|-------|-------|-------|
| scaffold01652 | 1216  | 7116  | 5901  | 32.38 | C_unshiu_00415 | 127452 | 133361 | 5910  | 2.68  | 99.09 |
| scaffold01652 | 7342  | 13691 | 6350  | 34.85 | C_unshiu_00415 | 133743 | 140093 | 6351  | 2.88  | 99.95 |
| scaffold01652 | 13700 | 15452 | 1753  | 9.62  | C_unshiu_00313 | 56916  | 58659  | 1744  | 0.67  | 98.8  |
| scaffold01652 | 15596 | 16912 | 1317  | 7.23  | C_unshiu_00637 | 15517  | 14198  | 1320  | 0.83  | 98.94 |
| scaffold01652 | 16911 | 18222 | 1312  | 7.2   | C_unshiu_00415 | 142423 | 143734 | 1312  | 0.59  | 99.7  |
| scaffold01653 | 5176  | 7281  | 2106  | 11.57 | C_unshiu_00104 | 104034 | 106139 | 2106  | 0.47  | 99.91 |
| scaffold01653 | 13131 | 14324 | 1194  | 6.56  | C_unshiu_00104 | 111088 | 112280 | 1193  | 0.26  | 99.92 |
| scaffold01653 | 16782 | 18200 | 1419  | 7.8   | C_unshiu_00104 | 115288 | 116697 | 1410  | 0.31  | 99.15 |
| scaffold01654 | 3793  | 10041 | 6249  | 34.48 | C_unshiu_01446 | 11242  | 17529  | 6288  | 9.4   | 98.04 |
| scaffold01654 | 13755 | 15591 | 1837  | 6.19  | C_unshiu_01718 | 14181  | 12345  | 1837  | 3.54  | 100   |
| scaffold01656 | 1     | 2368  | 2368  | 13.11 | C_unshiu_00912 | 93783  | 96150  | 2368  | 2.04  | 99.96 |
| scaffold01658 | 397   | 6334  | 5938  | 32.99 | C_unshiu_01393 | 28164  | 22236  | 5929  | 8.36  | 99.24 |
| scaffold01658 | 8617  | 10010 | 1394  | 7.74  | C_unshiu_01393 | 18929  | 17539  | 1391  | 1.96  | 98.85 |
| scaffold01658 | 13712 | 14826 | 1115  | 6.19  | C_unshiu_00930 | 97880  | 98994  | 1115  | 0.98  | 100   |
| scaffold01658 | 16583 | 18000 | 1418  | 7.88  | C_unshiu_00930 | 100942 | 102367 | 1426  | 1.25  | 99.44 |
| scaffold01659 | 1     | 17971 | 17971 | 100   | C_unshiu_00939 | 22793  | 4823   | 17971 | 15.98 | 100   |
| scaffold01660 | 1     | 6050  | 6050  | 33.73 | C_unshiu_00648 | 123299 | 117250 | 6050  | 3.85  | 98.88 |
| scaffold01660 | 13872 | 16529 | 2658  | 14.82 | C_unshiu_00648 | 110251 | 107593 | 2659  | 1.69  | 98.87 |
| scaffold01661 | 3172  | 4311  | 1140  | 6.35  | C_unshiu_00829 | 74548  | 75688  | 1141  | 0.91  | 98.95 |
| scaffold01661 | 5915  | 7266  | 1352  | 7.54  | C_unshiu_00340 | 71792  | 70441  | 1352  | 0.54  | 100   |
| scaffold01661 | 7258  | 8390  | 1133  | 6.32  | C_unshiu_01784 | 3043   | 4177   | 1135  | 2.31  | 98.94 |
| scaffold01661 | 13362 | 17260 | 3899  | 21.73 | C_unshiu_01784 | 9834   | 13722  | 3889  | 7.92  | 98.19 |
| scaffold01664 | 1     | 5511  | 5511  | 30.79 | C_unshiu_01450 | 45890  | 40380  | 5511  | 8.28  | 99.26 |
| scaffold01664 | 13139 | 14916 | 1778  | 9.93  | C_unshiu_01450 | 32112  | 30342  | 1771  | 2.66  | 98.6  |
| scaffold01665 | 6345  | 10642 | 4298  | 24.03 | C_unshiu_01623 | 18164  | 13867  | 4298  | 7.61  | 100   |
| scaffold01667 | 7243  | 10440 | 3198  | 17.96 | C_unshiu_00303 | 192219 | 189034 | 3186  | 1.2   | 98.72 |
| scaffold01667 | 13205 | 15512 | 2308  | 12.96 | C_unshiu_01244 | 22796  | 25103  | 2308  | 2.83  | 100   |
| scaffold01668 | 50    | 3089  | 3040  | 17.07 | C_unshiu_02448 | 21658  | 24694  | 3037  | 11.58 | 98.52 |
| scaffold01669 | 10423 | 11894 | 1472  | 8.28  | C_unshiu_00676 | 108429 | 106955 | 1475  | 0.99  | 99.46 |
| scaffold01671 | 12853 | 17767 | 4915  | 27.66 | C_unshiu_01030 | 48383  | 53332  | 4950  | 4.81  | 98.77 |
| scaffold01673 | 8     | 12071 | 12064 | 68.16 | C_unshiu_00673 | 147095 | 135024 | 12072 | 8.02  | 99.69 |
| scaffold01674 | 1     | 4704  | 4704  | 26.61 | C_unshiu_00493 | 64207  | 59497  | 4711  | 2.42  | 99.28 |
| scaffold01676 | 13380 | 16745 | 3366  | 19.08 | C_unshiu_00106 | 340212 | 343578 | 3367  | 0.75  | 99.85 |
| scaffold01677 | 12686 | 15094 | 2409  | 13.67 | C_unshiu_00570 | 100482 | 102903 | 2422  | 1.39  | 98.8  |
| scaffold01677 | 15551 | 17626 | 2076  | 11.78 | C_unshiu_00570 | 103751 | 105830 | 2080  | 1.2   | 98.9  |
| scaffold01678 | 4657  | 5797  | 1141  | 6.5   | C_unshiu_01495 | 27372  | 26232  | 1141  | 1.8   | 99.91 |
| scaffold01678 | 13234 | 17566 | 4333  | 24.67 | C_unshiu_01495 | 11936  | 7599   | 4338  | 6.83  | 98.2  |
| scaffold01679 | 2060  | 6401  | 4342  | 24.73 | C_unshiu_00673 | 100159 | 95828  | 4332  | 2.88  | 99.01 |
| scaffold01679 | 7998  | 13060 | 5063  | 28.83 | C_unshiu_00673 | 95826  | 90767  | 5060  | 3.36  | 99.74 |
| scaffold01680 | 14039 | 15351 | 1313  | 7.48  | C_unshiu_00110 | 28244  | 29558  | 1315  | 0.3   | 98.02 |
| scaffold01680 | 16225 | 17549 | 1325  | 7.55  | C_unshiu_00110 | 31847  | 33194  | 1348  | 0.31  | 98.22 |
| scaffold01681 | 9954  | 11191 | 1238  | 7.06  | C_unshiu_00563 | 18370  | 17133  | 1238  | 0.71  | 99.76 |
| scaffold01681 | 11908 | 13460 | 1553  | 8.86  | C_unshiu_00563 | 16858  | 15305  | 1554  | 0.89  | 99.1  |
| scaffold01684 | 4621  | 7855  | 3235  | 18.48 | C_unshiu_00293 | 88704  | 91940  | 3237  | 1.2   | 98.24 |
| scaffold01684 | 7860  | 17501 | 9642  | 55.08 | C_unshiu_00293 | 91692  | 101333 | 9642  | 3.57  | 99.91 |
| scaffold01685 | 2809  | 4068  | 1260  | 7.21  | C_unshiu_00211 | 98250  | 99509  | 1260  | 0.38  | 100   |
| scaffold01685 | 4443  | 10201 | 5759  | 32.96 | C_unshiu_00211 | 99924  | 105661 | 5738  | 1.75  | 99.17 |
| scaffold01686 | 1     | 10358 | 10358 | 59.29 | C_unshiu_01322 | 17798  | 28178  | 10381 | 13.78 | 99.15 |
| scaffold01686 | 13608 | 14707 | 1100  | 6.3   | C_unshiu_01322 | 33908  | 35007  | 1100  | 1.46  | 100   |
| scaffold01686 | 16328 | 17471 | 1144  | 6.55  | C_unshiu_01322 | 37589  | 38722  | 1134  | 1.5   | 98.78 |
| scaffold01687 | 1     | 1055  | 1055  | 6.06  | C_unshiu_00176 | 42676  | 41620  | 1057  | 0.29  | 99.43 |
| scaffold01687 | 2653  | 5804  | 3152  | 18.11 | C_unshiu_00176 | 40316  | 37144  | 3173  | 0.88  | 98.12 |
| scaffold01687 | 7941  | 11659 | 3719  | 21.36 | C_unshiu_00176 | 35972  | 32279  | 3694  | 1.02  | 98.84 |
| scaffold01687 | 12224 | 17407 | 5184  | 29.78 | C_unshiu_00482 | 38374  | 33191  | 5184  | 2.63  | 99.94 |
| scaffold01688 | 907   | 11839 | 10933 | 62.87 | C_unshiu_00346 | 144387 | 155306 | 10920 | 4.41  | 99.56 |
| scaffold01688 | 11948 | 17390 | 5443  | 31.3  | C_unshiu_00346 | 155306 | 160748 | 5443  | 2.2   | 99.85 |
| scaffold01689 | 9948  | 11264 | 1317  | 7.58  | C_unshiu_01416 | 44625  | 45941  | 1317  | 1.89  | 99.16 |
| scaffold01689 | 14244 | 16159 | 1916  | 11.02 | C_unshiu_01286 | 69388  | 67473  | 1916  | 2.45  | 99.27 |
| scaffold01690 | 1     | 1028  | 1028  | 5.93  | C_unshiu_00477 | 142141 | 141107 | 1035  | 0.52  | 98.65 |
| scaffold01690 | 6331  | 10048 | 3718  | 21.44 | C_unshiu_00477 | 135720 | 131996 | 3725  | 1.87  | 98.71 |
| scaffold01690 | 10104 | 11486 | 1383  | 7.98  | C_unshiu_00477 | 131634 | 130253 | 1382  | 0.69  | 99.93 |
| scaffold01691 | 4545  | 9509  | 4965  | 28.67 | C_unshiu_00355 | 55642  | 60642  | 5001  | 2.1   | 99.2  |
| scaffold01692 | 1167  | 2832  | 1666  | 9.63  | C_unshiu_00763 | 15982  | 14314  | 1669  | 1.24  | 99.58 |
| scaffold01692 | 9500  | 11356 | 1857  | 10.74 | C_unshiu_00763 | 7447   | 5591   | 1857  | 1.38  | 100   |
| scaffold01692 | 14243 | 17298 | 3056  | 17.67 | C_unshiu_00763 | 4058   | 999    | 3060  | 2.27  | 99.31 |
| scaffold01693 | 1     | 1016  | 1016  | 5.88  | C_unshiu_00923 | 85881  | 86900  | 1020  | 0.89  | 99.02 |
| scaffold01693 | 4516  | 8015  | 3500  | 20.24 | C_unshiu_01730 | 29618  | 33117  | 3500  | 6.8   | 100   |
| scaffold01696 | 14621 | 16549 | 1929  | 11.25 | C_unshiu_00671 | 1928   | 1      | 1928  | 1.27  | 99.53 |
| scaffold01697 | 1359  | 4544  | 3186  | 18.65 | C_unshiu_00777 | 4097   | 7267   | 3171  | 2.41  | 99.18 |
| scaffold01697 | 7489  | 8913  | 1425  | 8.34  | C_unshiu_00777 | 9253   | 10676  | 1424  | 1.08  | 98.81 |
| scaffold01698 | 1     | 1724  | 1724  | 10.11 | C_unshiu_00822 | 83289  | 85014  | 1726  | 1.37  | 99.54 |
| scaffold01698 | 14072 | 15715 | 1644  | 9.64  | C_unshiu_00822 | 96044  | 97689  | 1646  | 1.3   | 98.36 |
| scaffold01699 | 102   | 7995  | 7894  | 46.22 | C_unshiu_00893 | 98970  | 106844 | 7875  | 6.69  | 99.48 |
| scaffold01699 | 11670 | 16990 | 5321  | 31.16 | C_unshiu_00893 | 110263 | 115563 | 5301  | 4.5   | 99.21 |
| scaffold01701 | 4     | 8526  | 8523  | 50.1  | C_unshiu_00208 | 300447 | 291861 | 8587  | 2.6   | 98.46 |
| scaffold01701 | 8543  | 12999 | 4457  | 26.2  | C_unshiu_02441 | 772    | 5228   | 4457  | 16.86 | 100   |
| scaffold01702 | 14797 | 17013 | 2217  | 13.03 | C_unshiu_00360 | 21413  | 23657  | 2245  | 0.95  | 98.57 |
| scaffold01703 | 4443  | 5752  | 1310  | 7.71  | C_unshiu_00140 | 390580 | 391889 | 1310  | 0.33  | 100   |
| scaffold01703 | 10941 | 13092 | 2152  | 12.66 | C_unshiu_00132 | 383932 | 381794 | 2139  | 0.52  | 98.1  |

|               |       |       |       |       |                |        |        |       |       |       |
|---------------|-------|-------|-------|-------|----------------|--------|--------|-------|-------|-------|
| scaffold01703 | 15743 | 16993 | 1251  | 7.36  | C_unshiu_00132 | 378841 | 377591 | 1251  | 0.3   | 100   |
| scaffold01704 | 7769  | 9067  | 1299  | 7.67  | C_unshiu_01281 | 32131  | 33431  | 1301  | 1.66  | 98.01 |
| scaffold01705 | 2988  | 5641  | 2654  | 15.71 | C_unshiu_00681 | 31690  | 29035  | 2656  | 1.79  | 99.25 |
| scaffold01705 | 9123  | 12200 | 3078  | 18.22 | C_unshiu_00870 | 109262 | 112318 | 3057  | 2.54  | 98.86 |
| scaffold01705 | 12648 | 16897 | 4250  | 25.15 | C_unshiu_00870 | 113126 | 117388 | 4263  | 3.54  | 99.51 |
| scaffold01707 | 2056  | 3921  | 1866  | 11.1  | C_unshiu_00468 | 96805  | 98670  | 1866  | 0.93  | 99.79 |
| scaffold01707 | 3945  | 9799  | 5855  | 34.83 | C_unshiu_02824 | 5855   | 1      | 5855  | 33.71 | 99.66 |
| scaffold01708 | 1     | 1188  | 1188  | 7.07  | C_unshiu_00471 | 5467   | 4279   | 1189  | 0.59  | 99.24 |
| scaffold01708 | 3157  | 4555  | 1399  | 8.32  | C_unshiu_00471 | 1399   | 1      | 1399  | 0.7   | 99.86 |
| scaffold01708 | 12051 | 14099 | 2049  | 12.19 | C_unshiu_00611 | 29490  | 31538  | 2049  | 1.24  | 100   |
| scaffold01709 | 1     | 1032  | 1032  | 6.14  | C_unshiu_00784 | 121280 | 122311 | 1032  | 0.79  | 99.9  |
| scaffold01709 | 2263  | 3745  | 1483  | 8.82  | C_unshiu_00784 | 122163 | 123645 | 1483  | 1.14  | 99.46 |
| scaffold01709 | 15110 | 16814 | 1705  | 10.14 | C_unshiu_00429 | 39062  | 37358  | 1705  | 0.79  | 99.71 |
| scaffold01710 | 12368 | 13769 | 1402  | 8.34  | C_unshiu_01229 | 1402   | 1      | 1402  | 1.7   | 99.93 |
| scaffold01710 | 12816 | 15701 | 2886  | 17.18 | C_unshiu_00053 | 554849 | 551976 | 2874  | 0.48  | 99.2  |
| scaffold01712 | 5445  | 6730  | 1286  | 7.66  | C_unshiu_00800 | 51366  | 50081  | 1286  | 1     | 98.14 |
| scaffold01712 | 14478 | 16781 | 2304  | 13.73 | C_unshiu_00599 | 164543 | 162239 | 2305  | 1.37  | 99.57 |
| scaffold01714 | 1     | 2259  | 2259  | 13.56 | C_unshiu_00280 | 43300  | 45558  | 2259  | 0.82  | 99.87 |
| scaffold01714 | 2298  | 5170  | 2873  | 17.24 | C_unshiu_00635 | 68863  | 71734  | 2872  | 1.8   | 99.97 |
| scaffold01714 | 11111 | 13070 | 1960  | 11.76 | C_unshiu_00280 | 54833  | 56795  | 1963  | 0.71  | 99.44 |
| scaffold01715 | 5930  | 8964  | 3035  | 18.19 | C_unshiu_02647 | 17599  | 20635  | 3037  | 14.52 | 99.93 |
| scaffold01717 | 2647  | 3714  | 1068  | 6.43  | C_unshiu_02648 | 20086  | 19019  | 1068  | 5.11  | 100   |
| scaffold01717 | 3719  | 5191  | 1473  | 8.88  | C_unshiu_02648 | 18615  | 17143  | 1473  | 7.05  | 100   |
| scaffold01717 | 10082 | 12487 | 2406  | 14.5  | C_unshiu_00996 | 18904  | 16496  | 2409  | 2.26  | 98.63 |
| scaffold01717 | 14765 | 16597 | 1833  | 11.04 | C_unshiu_00996 | 14047  | 12215  | 1833  | 1.72  | 99.78 |
| scaffold01718 | 1     | 3623  | 3623  | 21.84 | C_unshiu_00015 | 43754  | 40132  | 3623  | 0.41  | 100   |
| scaffold01718 | 3623  | 12660 | 9038  | 54.48 | C_unshiu_00015 | 12497  | 3473   | 9025  | 1.03  | 99.86 |
| scaffold01718 | 12663 | 14356 | 1694  | 10.21 | C_unshiu_00015 | 3384   | 1693   | 1692  | 0.19  | 99.88 |
| scaffold01719 | 1     | 3468  | 3468  | 20.92 | C_unshiu_00862 | 16762  | 20228  | 3467  | 2.86  | 99.68 |
| scaffold01719 | 5695  | 6739  | 1045  | 6.3   | C_unshiu_00862 | 23145  | 24197  | 1053  | 0.87  | 98.2  |
| scaffold01720 | 14938 | 16073 | 1136  | 6.86  | C_unshiu_00511 | 134497 | 135632 | 1136  | 0.6   | 100   |
| scaffold01721 | 7988  | 10032 | 2045  | 12.37 | C_unshiu_03110 | 2135   | 88     | 2048  | 22.82 | 98.25 |
| scaffold01721 | 10934 | 12149 | 1216  | 7.35  | C_unshiu_00424 | 206863 | 205643 | 1221  | 0.56  | 98.05 |
| scaffold01721 | 12823 | 14070 | 1248  | 7.55  | C_unshiu_03110 | 2207   | 964    | 1244  | 13.86 | 99.6  |
| scaffold01722 | 4728  | 8251  | 3524  | 21.34 | C_unshiu_01054 | 1      | 3524   | 3524  | 3.53  | 99.83 |
| scaffold01722 | 10259 | 12322 | 2064  | 12.5  | C_unshiu_02536 | 19162  | 17099  | 2064  | 8.71  | 98.3  |
| scaffold01722 | 12392 | 13640 | 1249  | 7.56  | C_unshiu_00457 | 122950 | 121701 | 1250  | 0.61  | 99.36 |
| scaffold01722 | 15277 | 16517 | 1241  | 7.51  | C_unshiu_02536 | 14884  | 13644  | 1241  | 5.24  | 99.36 |
| scaffold01723 | 4609  | 7363  | 2755  | 16.78 | C_unshiu_00210 | 313619 | 310867 | 2753  | 0.84  | 99.75 |
| scaffold01723 | 11711 | 13183 | 1473  | 8.97  | C_unshiu_00210 | 306309 | 304836 | 1474  | 0.45  | 99.05 |
| scaffold01723 | 14742 | 16322 | 1581  | 9.63  | C_unshiu_00210 | 303171 | 301591 | 1581  | 0.48  | 99.87 |
| scaffold01724 | 5337  | 8862  | 3526  | 21.48 | C_unshiu_01797 | 7870   | 4345   | 3526  | 7.27  | 100   |
| scaffold01724 | 8873  | 10766 | 1894  | 11.54 | C_unshiu_01387 | 52342  | 50452  | 1891  | 2.66  | 99.37 |
| scaffold01725 | 1     | 1628  | 1628  | 9.92  | C_unshiu_00316 | 75490  | 73863  | 1628  | 0.63  | 99.57 |
| scaffold01725 | 2654  | 3766  | 1113  | 6.78  | C_unshiu_00316 | 72735  | 71623  | 1113  | 0.43  | 99.01 |
| scaffold01726 | 6742  | 10537 | 3796  | 23.21 | C_unshiu_00160 | 27870  | 24071  | 3800  | 1.02  | 99.11 |
| scaffold01727 | 1     | 5263  | 5263  | 32.19 | C_unshiu_01736 | 7441   | 2181   | 5261  | 10.27 | 98.04 |
| scaffold01728 | 4231  | 5684  | 1454  | 8.9   | C_unshiu_01493 | 57461  | 56008  | 1454  | 2.29  | 99.59 |
| scaffold01729 | 3747  | 6250  | 2504  | 15.36 | C_unshiu_01174 | 18322  | 20825  | 2504  | 2.84  | 100   |
| scaffold01729 | 7801  | 8954  | 1154  | 7.08  | C_unshiu_00422 | 217229 | 218373 | 1145  | 0.52  | 98.01 |
| scaffold01729 | 11975 | 14142 | 2168  | 13.3  | C_unshiu_00422 | 210228 | 208061 | 2168  | 0.99  | 99.59 |
| scaffold01729 | 14177 | 16301 | 2125  | 13.04 | C_unshiu_00422 | 208097 | 205970 | 2128  | 0.97  | 99.39 |
| scaffold01732 | 14944 | 16261 | 1318  | 8.11  | C_unshiu_01464 | 65236  | 63918  | 1319  | 2.01  | 98.79 |
| scaffold01733 | 1     | 6064  | 6064  | 37.4  | C_unshiu_01936 | 35359  | 41426  | 6068  | 14.01 | 99.23 |
| scaffold01733 | 12709 | 16216 | 3508  | 21.63 | C_unshiu_02594 | 16818  | 13309  | 3510  | 15.73 | 98.95 |
| scaffold01734 | 2735  | 3865  | 1131  | 6.98  | C_unshiu_00117 | 126380 | 127510 | 1131  | 0.26  | 100   |
| scaffold01734 | 6330  | 10615 | 4286  | 26.46 | C_unshiu_00582 | 168978 | 164699 | 4280  | 2.5   | 99.84 |
| scaffold01734 | 10908 | 13277 | 2370  | 14.63 | C_unshiu_00582 | 164152 | 161782 | 2371  | 1.39  | 99.96 |
| scaffold01734 | 14061 | 15660 | 1600  | 9.88  | C_unshiu_00793 | 113031 | 114630 | 1600  | 1.24  | 100   |
| scaffold01735 | 10673 | 16195 | 5523  | 34.1  | C_unshiu_02457 | 14792  | 9267   | 5526  | 21.32 | 99.84 |
| scaffold01736 | 31    | 12736 | 12706 | 78.67 | C_unshiu_00499 | 190141 | 177432 | 12710 | 6.63  | 99.57 |
| scaffold01738 | 10054 | 11579 | 1526  | 9.49  | C_unshiu_01219 | 39179  | 40706  | 1528  | 1.82  | 98.76 |
| scaffold01738 | 11986 | 16081 | 4096  | 25.47 | C_unshiu_01219 | 41646  | 45741  | 4096  | 4.88  | 98.03 |
| scaffold01739 | 7303  | 10926 | 3624  | 22.6  | C_unshiu_01711 | 18531  | 14912  | 3620  | 6.95  | 99.14 |
| scaffold01739 | 13429 | 14774 | 1346  | 8.39  | C_unshiu_00184 | 16152  | 17497  | 1346  | 0.38  | 99.85 |
| scaffold01739 | 14809 | 16036 | 1228  | 7.66  | C_unshiu_00184 | 18076  | 19303  | 1228  | 0.35  | 100   |
| scaffold01740 | 1     | 2742  | 2742  | 17.12 | C_unshiu_02188 | 3518   | 6293   | 2776  | 8.25  | 98.41 |
| scaffold01741 | 1     | 2856  | 2856  | 17.86 | C_unshiu_01971 | 20057  | 17202  | 2856  | 6.85  | 99.93 |
| scaffold01741 | 5859  | 9663  | 3805  | 23.79 | C_unshiu_01971 | 7270   | 3481   | 3790  | 9.09  | 99.21 |
| scaffold01746 | 5413  | 7448  | 2036  | 12.84 | C_unshiu_00345 | 16654  | 18689  | 2036  | 0.82  | 100   |
| scaffold01746 | 7960  | 14765 | 6806  | 42.93 | C_unshiu_02641 | 14327  | 21132  | 6806  | 32.21 | 99.94 |
| scaffold01747 | 1     | 2344  | 2344  | 14.8  | C_unshiu_00180 | 223295 | 225638 | 2344  | 0.65  | 99.32 |
| scaffold01749 | 7492  | 9707  | 2216  | 14.03 | C_unshiu_00095 | 131015 | 128800 | 2216  | 0.48  | 100   |
| scaffold01749 | 8683  | 9710  | 1028  | 6.51  | C_unshiu_01398 | 21479  | 22506  | 1028  | 1.46  | 100   |
| scaffold01749 | 12150 | 13414 | 1265  | 8.01  | C_unshiu_00155 | 119177 | 120442 | 1266  | 0.33  | 98.97 |
| scaffold01751 | 10608 | 13150 | 2543  | 16.12 | C_unshiu_02353 | 15653  | 13111  | 2543  | 9     | 100   |
| scaffold01752 | 1283  | 6822  | 5540  | 35.14 | C_unshiu_00132 | 51622  | 57162  | 5541  | 1.35  | 99.95 |
| scaffold01752 | 8182  | 11670 | 3489  | 22.13 | C_unshiu_00132 | 59164  | 62651  | 3488  | 0.85  | 99.89 |
| scaffold01753 | 1     | 1216  | 1216  | 7.72  | C_unshiu_00435 | 198600 | 197385 | 1216  | 0.57  | 100   |

|               |       |       |       |       |                |        |        |       |       |       |
|---------------|-------|-------|-------|-------|----------------|--------|--------|-------|-------|-------|
| scaffold01753 | 10298 | 12197 | 1900  | 12.06 | C_unshiu_00180 | 6149   | 4249   | 1901  | 0.53  | 99.37 |
| scaffold01755 | 6208  | 8589  | 2382  | 15.21 | C_unshiu_01149 | 10470  | 8093   | 2378  | 2.62  | 99.75 |
| scaffold01755 | 9256  | 13071 | 3816  | 24.36 | C_unshiu_01149 | 7148   | 3358   | 3791  | 4.17  | 98.87 |
| scaffold01757 | 2257  | 12625 | 10369 | 66.31 | C_unshiu_00247 | 290044 | 279679 | 10366 | 3.48  | 98.56 |
| scaffold01757 | 14025 | 15636 | 1612  | 10.31 | C_unshiu_00247 | 277733 | 276122 | 1612  | 0.54  | 99.81 |
| scaffold01758 | 35    | 2956  | 2922  | 18.71 | C_unshiu_00146 | 17385  | 14462  | 2924  | 0.75  | 99.79 |
| scaffold01759 | 3516  | 4823  | 1308  | 8.37  | C_unshiu_01001 | 93015  | 91708  | 1308  | 1.23  | 100   |
| scaffold01759 | 5824  | 7058  | 1235  | 7.9   | C_unshiu_01001 | 91164  | 89931  | 1234  | 1.16  | 99.84 |
| scaffold01760 | 1     | 1429  | 1429  | 9.16  | C_unshiu_01569 | 35990  | 34561  | 1430  | 2.42  | 98.46 |
| scaffold01760 | 12874 | 14100 | 1227  | 7.86  | C_unshiu_01569 | 44755  | 45981  | 1227  | 2.07  | 99.84 |
| scaffold01761 | 810   | 2319  | 1510  | 9.68  | C_unshiu_02326 | 5382   | 6891   | 1510  | 5.19  | 100   |
| scaffold01761 | 2838  | 8789  | 5952  | 38.15 | C_unshiu_00446 | 21067  | 27023  | 5957  | 2.85  | 99.43 |
| scaffold01761 | 3658  | 15601 | 11944 | 76.56 | C_unshiu_02326 | 7738   | 19691  | 11954 | 41.13 | 99.55 |
| scaffold01762 | 11863 | 14217 | 2355  | 15.18 | C_unshiu_02872 | 4112   | 6466   | 2355  | 14.37 | 99.96 |
| scaffold01764 | 1     | 4053  | 4053  | 26.17 | C_unshiu_02426 | 22245  | 18193  | 4053  | 15.15 | 100   |
| scaffold01764 | 6167  | 10214 | 4048  | 26.14 | C_unshiu_02426 | 15516  | 11469  | 4048  | 15.13 | 100   |
| scaffold01764 | 11097 | 15486 | 4390  | 28.35 | C_unshiu_02426 | 10232  | 5843   | 4390  | 16.41 | 99.93 |
| scaffold01765 | 12479 | 15499 | 3021  | 19.49 | C_unshiu_00723 | 39212  | 36196  | 3017  | 2.15  | 99.67 |
| scaffold01767 | 7970  | 9125  | 1156  | 7.49  | C_unshiu_00213 | 261065 | 259909 | 1157  | 0.35  | 99.83 |
| scaffold01767 | 10733 | 12486 | 1754  | 11.37 | C_unshiu_00213 | 258473 | 256722 | 1752  | 0.54  | 99.15 |
| scaffold01767 | 12480 | 14845 | 2366  | 15.34 | C_unshiu_01491 | 33894  | 36259  | 2366  | 3.71  | 100   |
| scaffold01768 | 10570 | 11601 | 1032  | 6.68  | C_unshiu_02906 | 5155   | 6186   | 1032  | 6.62  | 99.71 |
| scaffold01770 | 1022  | 2622  | 1601  | 10.39 | C_unshiu_00468 | 145605 | 144002 | 1604  | 0.8   | 99.19 |
| scaffold01770 | 8729  | 12989 | 4261  | 27.64 | C_unshiu_00468 | 135435 | 131155 | 4281  | 2.13  | 99.16 |
| scaffold01771 | 4248  | 9323  | 5076  | 32.98 | C_unshiu_00279 | 236    | 5310   | 5075  | 1.83  | 99.82 |
| scaffold01771 | 10041 | 15392 | 5352  | 34.77 | C_unshiu_00279 | 5782   | 11116  | 5335  | 1.92  | 99.65 |
| scaffold01772 | 2901  | 5775  | 2875  | 18.32 | C_unshiu_02796 | 17967  | 15093  | 2875  | 16    | 100   |
| scaffold01772 | 11223 | 13710 | 2488  | 16.2  | C_unshiu_02796 | 10437  | 7950   | 2488  | 13.85 | 100   |
| scaffold01773 | 5     | 11586 | 11582 | 75.58 | C_unshiu_00639 | 153405 | 141857 | 11549 | 7.29  | 99.3  |
| scaffold01774 | 1     | 1166  | 1166  | 7.62  | C_unshiu_01782 | 3800   | 2635   | 1166  | 2.37  | 100   |
| scaffold01774 | 1315  | 3006  | 1692  | 11.05 | C_unshiu_01782 | 2116   | 433    | 1684  | 3.42  | 98.46 |
| scaffold01774 | 6230  | 7449  | 1220  | 7.97  | C_unshiu_01092 | 4316   | 5535   | 1220  | 1.26  | 100   |
| scaffold01775 | 1     | 15302 | 15302 | 100   | C_unshiu_00100 | 428348 | 443666 | 15319 | 3.35  | 99.89 |
| scaffold01776 | 5     | 2939  | 2935  | 19.18 | C_unshiu_00201 | 30700  | 33630  | 2931  | 0.87  | 99.63 |
| scaffold01776 | 4357  | 8889  | 4533  | 29.63 | C_unshiu_01170 | 62169  | 57652  | 4518  | 5.11  | 98.88 |
| scaffold01776 | 10382 | 12767 | 2386  | 15.6  | C_unshiu_01170 | 55671  | 53298  | 2374  | 2.69  | 99.04 |
| scaffold01777 | 5118  | 8256  | 3139  | 20.55 | C_unshiu_00568 | 7530   | 4392   | 3139  | 1.8   | 99.33 |
| scaffold01777 | 12318 | 13922 | 1605  | 10.51 | C_unshiu_00568 | 2240   | 3844   | 1605  | 0.92  | 100   |
| scaffold01777 | 13924 | 15024 | 1101  | 7.21  | C_unshiu_00568 | 2087   | 987    | 1101  | 0.63  | 100   |
| scaffold01780 | 9717  | 15239 | 5523  | 36.24 | C_unshiu_00205 | 10554  | 5041   | 5514  | 1.67  | 99.2  |
| scaffold01781 | 1     | 8887  | 8887  | 58.4  | C_unshiu_00120 | 347917 | 356807 | 8891  | 2.11  | 99.88 |
| scaffold01781 | 1750  | 13199 | 11450 | 75.24 | C_unshiu_00120 | 335880 | 347193 | 11314 | 2.68  | 98.32 |
| scaffold01781 | 11711 | 15217 | 3507  | 23.05 | C_unshiu_00120 | 335887 | 332379 | 3509  | 0.83  | 99.94 |
| scaffold01782 | 1     | 5377  | 5377  | 35.39 | C_unshiu_00379 | 9035   | 14414  | 5380  | 2.34  | 98.64 |
| scaffold01784 | 1880  | 3673  | 1794  | 11.83 | C_unshiu_00378 | 134250 | 132456 | 1795  | 0.78  | 99.83 |
| scaffold01785 | 7974  | 10802 | 2829  | 18.73 | C_unshiu_02037 | 1287   | 4115   | 2829  | 7.21  | 100   |
| scaffold01785 | 12053 | 13100 | 1048  | 6.94  | C_unshiu_02037 | 5785   | 6832   | 1048  | 2.67  | 100   |
| scaffold01785 | 13495 | 15106 | 1612  | 10.67 | C_unshiu_00768 | 6563   | 4952   | 1612  | 1.21  | 99.5  |
| scaffold01786 | 4161  | 6001  | 1841  | 12.2  | C_unshiu_01518 | 22301  | 24141  | 1841  | 2.95  | 100   |
| scaffold01787 | 1     | 6311  | 6311  | 41.88 | C_unshiu_00976 | 92792  | 99092  | 6301  | 5.79  | 99.48 |
| scaffold01787 | 7121  | 8696  | 1576  | 10.46 | C_unshiu_00407 | 58086  | 59671  | 1586  | 0.71  | 98.11 |
| scaffold01788 | 1     | 1594  | 1594  | 10.58 | C_unshiu_01447 | 5130   | 3537   | 1594  | 2.39  | 99.69 |
| scaffold01788 | 3554  | 4764  | 1211  | 8.04  | C_unshiu_01997 | 1451   | 2667   | 1217  | 2.99  | 99.34 |
| scaffold01791 | 8268  | 13848 | 5581  | 37.24 | C_unshiu_00333 | 70379  | 64799  | 5581  | 2.22  | 100   |
| scaffold01792 | 8693  | 14956 | 6264  | 41.88 | C_unshiu_00477 | 193580 | 187288 | 6293  | 3.16  | 98.9  |
| scaffold01793 | 1     | 1572  | 1572  | 10.54 | C_unshiu_00602 | 128222 | 126651 | 1572  | 0.94  | 100   |
| scaffold01794 | 613   | 2567  | 1955  | 13.09 | C_unshiu_00539 | 112539 | 114492 | 1954  | 1.08  | 99.23 |
| scaffold01794 | 7545  | 10381 | 2837  | 18.99 | C_unshiu_01967 | 21567  | 24403  | 2837  | 6.77  | 99.68 |
| scaffold01795 | 1423  | 5401  | 3979  | 26.65 | C_unshiu_00707 | 120291 | 124269 | 3979  | 2.78  | 99.97 |
| scaffold01797 | 13568 | 14916 | 1349  | 9.04  | C_unshiu_00026 | 52708  | 54061  | 1354  | 0.18  | 98.97 |
| scaffold01798 | 10348 | 12144 | 1797  | 12.08 | C_unshiu_00443 | 27648  | 25859  | 1790  | 0.85  | 99.17 |
| scaffold01798 | 12899 | 14266 | 1368  | 9.2   | C_unshiu_00990 | 77911  | 79280  | 1370  | 1.27  | 99.34 |
| scaffold01801 | 7425  | 11898 | 4474  | 30.15 | C_unshiu_01863 | 45981  | 41507  | 4475  | 9.73  | 99.89 |
| scaffold01806 | 5670  | 7827  | 2158  | 14.61 | C_unshiu_00009 | 936175 | 934024 | 2152  | 0.2   | 98.06 |
| scaffold01807 | 4442  | 11198 | 6757  | 45.85 | C_unshiu_01094 | 54333  | 61090  | 6758  | 7     | 99.88 |
| scaffold01808 | 1     | 2163  | 2163  | 14.72 | C_unshiu_01033 | 42773  | 40611  | 2163  | 2.1   | 100   |
| scaffold01809 | 2927  | 8470  | 5544  | 37.69 | C_unshiu_00728 | 133462 | 139004 | 5543  | 3.99  | 99.98 |
| scaffold01810 | 4813  | 5833  | 1021  | 6.95  | C_unshiu_00105 | 218    | 1238   | 1021  | 0.23  | 99.9  |
| scaffold01810 | 9660  | 14686 | 5027  | 34.23 | C_unshiu_00105 | 4013   | 9014   | 5002  | 1.11  | 98.35 |
| scaffold01811 | 1     | 1064  | 1064  | 7.24  | C_unshiu_02747 | 11105  | 12168  | 1064  | 5.57  | 99.15 |
| scaffold01812 | 1     | 3285  | 3285  | 22.37 | C_unshiu_00541 | 71282  | 67963  | 3320  | 1.84  | 98.1  |
| scaffold01813 | 1104  | 2253  | 1150  | 7.83  | C_unshiu_01192 | 38464  | 37315  | 1150  | 1.33  | 98.96 |
| scaffold01815 | 2946  | 4039  | 1094  | 7.48  | C_unshiu_00760 | 22681  | 23774  | 1094  | 0.81  | 100   |
| scaffold01815 | 5310  | 7754  | 2445  | 16.72 | C_unshiu_02987 | 4595   | 7036   | 2442  | 18.45 | 99.35 |
| scaffold01815 | 7816  | 12551 | 4736  | 32.39 | C_unshiu_02987 | 5721   | 10431  | 4711  | 35.6  | 99.28 |
| scaffold01816 | 417   | 3637  | 3221  | 22.04 | C_unshiu_00044 | 54238  | 57457  | 3220  | 0.5   | 99.1  |
| scaffold01816 | 6410  | 7846  | 1437  | 9.83  | C_unshiu_00044 | 60714  | 62150  | 1437  | 0.23  | 98.47 |
| scaffold01816 | 9014  | 10165 | 1152  | 7.88  | C_unshiu_00044 | 63599  | 64750  | 1152  | 0.18  | 100   |
| scaffold01817 | 1363  | 9731  | 8369  | 57.33 | C_unshiu_00632 | 29575  | 37939  | 8365  | 5.21  | 99.93 |

|               |       |       |       |       |                |         |         |       |       |       |
|---------------|-------|-------|-------|-------|----------------|---------|---------|-------|-------|-------|
| scaffold01818 | 1     | 1308  | 1308  | 8.97  | C_unshiu_00245 | 39835   | 41147   | 1313  | 0.44  | 99.39 |
| scaffold01818 | 1977  | 6159  | 4183  | 28.68 | C_unshiu_00915 | 25453   | 29635   | 4183  | 3.62  | 100   |
| scaffold01818 | 6395  | 7800  | 1406  | 9.64  | C_unshiu_00245 | 46287   | 47693   | 1407  | 0.47  | 98.09 |
| scaffold01819 | 1     | 11128 | 11128 | 76.28 | C_unshiu_00197 | 186570  | 197698  | 11129 | 3.3   | 99.79 |
| scaffold01819 | 8651  | 14233 | 5583  | 38.27 | C_unshiu_01059 | 63034   | 68604   | 5571  | 5.61  | 98.64 |
| scaffold01820 | 10255 | 11874 | 1620  | 11.15 | C_unshiu_00457 | 187053  | 185438  | 1616  | 0.79  | 99.38 |
| scaffold01820 | 11913 | 13116 | 1204  | 8.29  | C_unshiu_00457 | 185095  | 183892  | 1204  | 0.59  | 99.58 |
| scaffold01821 | 3353  | 7894  | 4542  | 31.21 | C_unshiu_00007 | 1094490 | 1099045 | 4556  | 0.41  | 99.32 |
| scaffold01821 | 12001 | 14552 | 2552  | 17.54 | C_unshiu_00007 | 1104242 | 1106824 | 2583  | 0.23  | 98.34 |
| scaffold01822 | 5762  | 14551 | 8790  | 60.41 | C_unshiu_00351 | 69899   | 61070   | 8830  | 3.68  | 99.29 |
| scaffold01824 | 13473 | 14490 | 1018  | 7.03  | C_unshiu_02804 | 691     | 1710    | 1020  | 5.72  | 99.41 |
| scaffold01825 | 653   | 1775  | 1123  | 7.76  | C_unshiu_00617 | 91746   | 92865   | 1120  | 0.68  | 99.73 |
| scaffold01825 | 3940  | 9368  | 5429  | 37.51 | C_unshiu_00617 | 71661   | 66233   | 5429  | 3.32  | 99.56 |
| scaffold01825 | 11671 | 12897 | 1227  | 8.48  | C_unshiu_00486 | 131966  | 133192  | 1227  | 0.62  | 99.43 |
| scaffold01826 | 1     | 8874  | 8874  | 61.36 | C_unshiu_00871 | 117742  | 108893  | 8850  | 7.36  | 98.57 |
| scaffold01826 | 13451 | 14462 | 1012  | 7     | C_unshiu_00871 | 104781  | 103770  | 1012  | 0.84  | 100   |
| scaffold01827 | 707   | 7013  | 6307  | 43.62 | C_unshiu_00285 | 188875  | 182565  | 6311  | 2.3   | 99.73 |
| scaffold01827 | 11487 | 14446 | 2960  | 20.47 | C_unshiu_00285 | 178975  | 176045  | 2931  | 1.07  | 98.48 |
| scaffold01829 | 1     | 2326  | 2326  | 16.11 | C_unshiu_00141 | 272734  | 275059  | 2326  | 0.58  | 99.57 |
| scaffold01829 | 3143  | 4780  | 1638  | 11.35 | C_unshiu_01511 | 54873   | 56507   | 1635  | 2.61  | 99.39 |
| scaffold01829 | 11532 | 12747 | 1216  | 8.42  | C_unshiu_00934 | 62074   | 63290   | 1217  | 1.08  | 99.92 |
| scaffold01831 | 2366  | 4395  | 2030  | 14.1  | C_unshiu_01890 | 28085   | 26056   | 2030  | 4.51  | 99.9  |
| scaffold01832 | 1     | 5084  | 5084  | 35.34 | C_unshiu_01098 | 1125    | 6194    | 5070  | 5.27  | 99.25 |
| scaffold01832 | 11923 | 14388 | 2466  | 17.14 | C_unshiu_01098 | 12718   | 15183   | 2466  | 2.56  | 100   |
| scaffold01833 | 1     | 5641  | 5641  | 39.24 | C_unshiu_00114 | 52872   | 47232   | 5641  | 1.3   | 100   |
| scaffold01833 | 6211  | 14375 | 8165  | 56.8  | C_unshiu_00114 | 45648   | 37484   | 8165  | 1.88  | 100   |
| scaffold01834 | 3626  | 5319  | 1694  | 11.83 | C_unshiu_01571 | 21853   | 23548   | 1696  | 2.87  | 99.41 |
| scaffold01834 | 11098 | 12216 | 1119  | 7.81  | C_unshiu_01571 | 29515   | 30652   | 1138  | 1.93  | 98.15 |
| scaffold01835 | 1     | 13917 | 13917 | 97.17 | C_unshiu_01174 | 37692   | 23772   | 13921 | 15.81 | 99.64 |
| scaffold01837 | 1217  | 4385  | 3169  | 22.15 | C_unshiu_00351 | 43393   | 40225   | 3169  | 1.32  | 100   |
| scaffold01839 | 614   | 3956  | 3343  | 23.46 | C_unshiu_01514 | 27894   | 31215   | 3322  | 5.32  | 98.95 |
| scaffold01840 | 831   | 2846  | 2016  | 14.15 | C_unshiu_00510 | 70021   | 72040   | 2020  | 1.07  | 99.36 |
| scaffold01840 | 3013  | 5549  | 2537  | 17.81 | C_unshiu_00510 | 72499   | 75063   | 2565  | 1.36  | 98.79 |
| scaffold01840 | 6705  | 9237  | 2533  | 17.78 | C_unshiu_00510 | 77163   | 79700   | 2538  | 1.35  | 98.35 |
| scaffold01841 | 5933  | 9210  | 3278  | 23.09 | C_unshiu_02227 | 5624    | 8901    | 3278  | 10.14 | 99.97 |
| scaffold01841 | 10819 | 14195 | 3377  | 23.79 | C_unshiu_00363 | 146512  | 149890  | 3379  | 1.43  | 99.47 |
| scaffold01842 | 9514  | 11224 | 1711  | 12.02 | C_unshiu_00619 | 136208  | 134495  | 1714  | 1.05  | 98.83 |
| scaffold01843 | 7226  | 8846  | 1621  | 11.41 | C_unshiu_01128 | 89046   | 90666   | 1621  | 1.75  | 99.63 |
| scaffold01843 | 11942 | 13076 | 1135  | 7.99  | C_unshiu_00100 | 15612   | 16744   | 1133  | 0.25  | 98.59 |
| scaffold01843 | 13195 | 14208 | 1014  | 7.14  | C_unshiu_00100 | 16744   | 17757   | 1014  | 0.22  | 99.7  |
| scaffold01844 | 1423  | 3323  | 1901  | 13.42 | C_unshiu_00373 | 107795  | 109695  | 1901  | 0.82  | 99.42 |
| scaffold01847 | 8458  | 11083 | 2626  | 18.61 | C_unshiu_00009 | 701494  | 698857  | 2638  | 0.25  | 98.94 |
| scaffold01848 | 1     | 2094  | 2094  | 14.85 | C_unshiu_01722 | 5682    | 3589    | 2094  | 4.04  | 99.43 |
| scaffold01848 | 5900  | 8490  | 2591  | 18.38 | C_unshiu_00968 | 11082   | 13676   | 2595  | 2.37  | 98.38 |
| scaffold01848 | 13067 | 14099 | 1033  | 7.33  | C_unshiu_00968 | 21081   | 22127   | 1047  | 0.95  | 98.66 |
| scaffold01849 | 1     | 14098 | 14098 | 100   | C_unshiu_01812 | 45640   | 31543   | 14098 | 29.32 | 99.98 |
| scaffold01850 | 1     | 5002  | 5002  | 35.51 | C_unshiu_00011 | 234506  | 229505  | 5002  | 0.52  | 99.98 |
| scaffold01850 | 8501  | 11036 | 2536  | 18    | C_unshiu_00011 | 226759  | 224244  | 2516  | 0.26  | 98.23 |
| scaffold01850 | 12880 | 14088 | 1209  | 8.58  | C_unshiu_00011 | 222075  | 220864  | 1212  | 0.13  | 99.59 |
| scaffold01851 | 5212  | 9393  | 4182  | 29.84 | C_unshiu_00313 | 165960  | 161777  | 4184  | 1.62  | 98.66 |
| scaffold01851 | 9394  | 11732 | 2339  | 16.69 | C_unshiu_01303 | 35578   | 33240   | 2339  | 3.03  | 100   |
| scaffold01851 | 12617 | 14013 | 1397  | 9.97  | C_unshiu_00313 | 161664  | 160268  | 1397  | 0.54  | 100   |
| scaffold01852 | 12944 | 14025 | 1082  | 7.71  | C_unshiu_01138 | 48423   | 47341   | 1083  | 1.17  | 99.08 |
| scaffold01853 | 1     | 12804 | 12804 | 91.31 | C_unshiu_00061 | 380797  | 393600  | 12804 | 2.21  | 99.91 |
| scaffold01854 | 1038  | 4210  | 3173  | 22.64 | C_unshiu_01491 | 43375   | 40200   | 3176  | 4.99  | 99.12 |
| scaffold01854 | 4211  | 5661  | 1451  | 10.35 | C_unshiu_01593 | 29721   | 28271   | 1451  | 2.51  | 100   |
| scaffold01854 | 6644  | 7793  | 1150  | 8.2   | C_unshiu_02049 | 7031    | 5881    | 1151  | 2.98  | 99.91 |
| scaffold01854 | 7802  | 9646  | 1845  | 13.16 | C_unshiu_00822 | 43314   | 45157   | 1844  | 1.46  | 99.46 |
| scaffold01855 | 9310  | 10751 | 1442  | 10.29 | C_unshiu_00783 | 110752  | 112193  | 1442  | 1.1   | 99.03 |
| scaffold01856 | 1     | 13994 | 13994 | 100   | C_unshiu_01586 | 31218   | 17217   | 14002 | 24    | 99.94 |
| scaffold01857 | 9512  | 10616 | 1105  | 7.9   | C_unshiu_01087 | 87731   | 86628   | 1104  | 1.13  | 98.74 |
| scaffold01858 | 4923  | 13178 | 8256  | 59.09 | C_unshiu_00807 | 71700   | 63526   | 8175  | 6.41  | 98.15 |
| scaffold01859 | 6488  | 9443  | 2956  | 21.19 | C_unshiu_02312 | 17105   | 20051   | 2947  | 9.96  | 98.04 |
| scaffold01861 | 64    | 3477  | 3414  | 24.5  | C_unshiu_00492 | 65970   | 62570   | 3401  | 1.75  | 98.07 |
| scaffold01862 | 8851  | 10058 | 1208  | 8.71  | C_unshiu_02893 | 15944   | 14737   | 1208  | 7.58  | 99.75 |
| scaffold01862 | 10840 | 13016 | 2177  | 15.7  | C_unshiu_00186 | 35354   | 33162   | 2193  | 0.63  | 98.63 |
| scaffold01863 | 4454  | 6217  | 1764  | 12.67 | C_unshiu_00315 | 109579  | 107813  | 1767  | 0.68  | 99.38 |
| scaffold01864 | 5844  | 12936 | 7093  | 51.01 | C_unshiu_01703 | 2887    | 9979    | 7093  | 13.57 | 100   |
| scaffold01865 | 7994  | 9902  | 1909  | 13.75 | C_unshiu_00119 | 412298  | 414215  | 1918  | 0.45  | 98.23 |
| scaffold01866 | 2     | 1052  | 1051  | 7.56  | C_unshiu_02069 | 19713   | 20763   | 1051  | 2.76  | 99.62 |
| scaffold01866 | 1375  | 9225  | 7851  | 56.49 | C_unshiu_02069 | 21196   | 29023   | 7828  | 20.58 | 98.92 |
| scaffold01866 | 12841 | 13898 | 1058  | 7.61  | C_unshiu_02069 | 32792   | 33849   | 1058  | 2.78  | 100   |
| scaffold01868 | 4461  | 5963  | 1503  | 10.84 | C_unshiu_00123 | 122128  | 120617  | 1512  | 0.36  | 98.88 |
| scaffold01869 | 8295  | 10887 | 2593  | 18.73 | C_unshiu_01050 | 9804    | 12394   | 2591  | 2.59  | 99.15 |
| scaffold01869 | 10895 | 13846 | 2952  | 21.32 | C_unshiu_01050 | 12207   | 15175   | 2969  | 2.97  | 98.01 |
| scaffold01871 | 1     | 1269  | 1269  | 9.19  | C_unshiu_01954 | 34086   | 32815   | 1272  | 2.99  | 98.82 |
| scaffold01871 | 1342  | 3324  | 1983  | 14.37 | C_unshiu_01104 | 55608   | 53628   | 1981  | 2.07  | 99.09 |
| scaffold01871 | 3651  | 13801 | 10151 | 73.55 | C_unshiu_01104 | 52956   | 42804   | 10153 | 10.6  | 99.98 |
| scaffold01872 | 4682  | 6387  | 1706  | 12.36 | C_unshiu_00344 | 2211    | 506     | 1706  | 0.69  | 100   |

|               |       |       |       |       |                |        |        |       |       |       |
|---------------|-------|-------|-------|-------|----------------|--------|--------|-------|-------|-------|
| scaffold01874 | 1     | 1857  | 1857  | 13.5  | C_unshiu_02235 | 5621   | 3755   | 1867  | 5.81  | 98.13 |
| scaffold01874 | 4160  | 5808  | 1649  | 11.99 | C_unshiu_02235 | 1728   | 83     | 1646  | 5.13  | 98.67 |
| scaffold01874 | 5143  | 10667 | 5525  | 40.17 | C_unshiu_01054 | 28064  | 33582  | 5519  | 5.53  | 99.4  |
| scaffold01875 | 1     | 13755 | 13755 | 100   | C_unshiu_00232 | 161330 | 147657 | 13674 | 4.46  | 99.36 |
| scaffold01876 | 3569  | 6034  | 2466  | 17.94 | C_unshiu_00560 | 92035  | 94501  | 2467  | 1.41  | 99.55 |
| scaffold01876 | 11195 | 12286 | 1092  | 7.94  | C_unshiu_00560 | 98460  | 99562  | 1103  | 0.63  | 98.28 |
| scaffold01876 | 12287 | 13745 | 1459  | 10.61 | C_unshiu_00560 | 90454  | 91912  | 1459  | 0.83  | 99.59 |
| scaffold01877 | 7092  | 8791  | 1700  | 12.38 | C_unshiu_00650 | 23390  | 21685  | 1706  | 1.09  | 98.19 |
| scaffold01878 | 3     | 5496  | 5494  | 40.18 | C_unshiu_01433 | 9164   | 3668   | 5497  | 8.06  | 99.45 |
| scaffold01878 | 12102 | 13672 | 1571  | 11.49 | C_unshiu_01680 | 8528   | 10098  | 1571  | 2.94  | 100   |
| scaffold01879 | 4219  | 7621  | 3403  | 24.91 | C_unshiu_00056 | 547602 | 550999 | 3398  | 0.57  | 98.42 |
| scaffold01880 | 1     | 6546  | 6546  | 47.94 | C_unshiu_00040 | 377039 | 370514 | 6526  | 0.99  | 99.68 |
| scaffold01880 | 6004  | 13654 | 7651  | 56.03 | C_unshiu_00040 | 366260 | 358637 | 7624  | 1.16  | 99.61 |
| scaffold01881 | 2     | 2590  | 2589  | 18.96 | C_unshiu_00421 | 37651  | 40237  | 2587  | 1.18  | 99.85 |
| scaffold01881 | 3017  | 13655 | 10639 | 77.91 | C_unshiu_00421 | 40764  | 51413  | 10650 | 4.87  | 99.78 |
| scaffold01882 | 446   | 1912  | 1467  | 10.75 | C_unshiu_00030 | 224012 | 225482 | 1471  | 0.21  | 98.98 |
| scaffold01882 | 6259  | 7666  | 1408  | 10.32 | C_unshiu_00931 | 20020  | 18613  | 1408  | 1.24  | 100   |
| scaffold01882 | 11273 | 13646 | 2374  | 17.4  | C_unshiu_01801 | 15931  | 13563  | 2369  | 4.89  | 98.32 |
| scaffold01883 | 1     | 4842  | 4842  | 35.48 | C_unshiu_00449 | 106036 | 110865 | 4830  | 2.32  | 98.38 |
| scaffold01885 | 1167  | 2439  | 1273  | 9.36  | C_unshiu_01560 | 4018   | 5291   | 1274  | 2.13  | 98.82 |
| scaffold01885 | 7039  | 8542  | 1504  | 11.06 | C_unshiu_00708 | 95562  | 94059  | 1504  | 1.05  | 100   |
| scaffold01886 | 2063  | 6242  | 4180  | 30.81 | C_unshiu_00985 | 93642  | 97844  | 4203  | 3.89  | 98.03 |
| scaffold01887 | 9204  | 12904 | 3701  | 27.28 | C_unshiu_01046 | 80632  | 76921  | 3712  | 3.67  | 98.36 |
| scaffold01888 | 9426  | 11110 | 1685  | 12.43 | C_unshiu_01634 | 53975  | 55659  | 1685  | 3.03  | 100   |
| scaffold01889 | 4800  | 5860  | 1061  | 7.84  | C_unshiu_00597 | 165191 | 164132 | 1060  | 0.63  | 98.21 |
| scaffold01890 | 1693  | 4046  | 2354  | 17.42 | C_unshiu_00017 | 137815 | 135462 | 2354  | 0.28  | 100   |
| scaffold01890 | 5019  | 10193 | 5175  | 38.29 | C_unshiu_00017 | 133478 | 128305 | 5174  | 0.61  | 99.79 |
| scaffold01890 | 10416 | 13514 | 3099  | 22.93 | C_unshiu_00334 | 120663 | 117563 | 3101  | 1.24  | 99.81 |
| scaffold01892 | 1843  | 2884  | 1042  | 7.74  | C_unshiu_00194 | 229924 | 230970 | 1047  | 0.31  | 98.66 |
| scaffold01893 | 1     | 5041  | 5041  | 37.35 | C_unshiu_00142 | 217601 | 212553 | 5049  | 1.26  | 98.34 |
| scaffold01893 | 11936 | 13493 | 1558  | 11.55 | C_unshiu_02005 | 2461   | 4018   | 1558  | 3.85  | 99.42 |
| scaffold01894 | 1     | 4229  | 4229  | 31.43 | C_unshiu_00958 | 87057  | 91285  | 4229  | 3.82  | 99.03 |
| scaffold01894 | 164   | 13455 | 13292 | 98.79 | C_unshiu_01761 | 11864  | 25156  | 13293 | 26.63 | 99.65 |
| scaffold01895 | 1     | 1056  | 1056  | 7.86  | C_unshiu_01590 | 49095  | 50149  | 1055  | 1.81  | 99.43 |
| scaffold01895 | 4116  | 5187  | 1072  | 7.97  | C_unshiu_01590 | 48062  | 49133  | 1072  | 1.84  | 100   |
| scaffold01895 | 5181  | 6720  | 1540  | 11.46 | C_unshiu_00915 | 24124  | 25663  | 1540  | 1.33  | 100   |
| scaffold01895 | 6721  | 8993  | 2273  | 16.91 | C_unshiu_00264 | 121605 | 119340 | 2266  | 0.8   | 99.52 |
| scaffold01895 | 6721  | 8996  | 2276  | 16.93 | C_unshiu_00264 | 130281 | 132566 | 2286  | 0.8   | 99.34 |
| scaffold01895 | 10087 | 13443 | 3357  | 24.97 | C_unshiu_00264 | 134021 | 137379 | 3359  | 1.18  | 99.14 |
| scaffold01897 | 1     | 1812  | 1812  | 13.51 | C_unshiu_00078 | 251639 | 253451 | 1813  | 0.36  | 99.94 |
| scaffold01897 | 6611  | 7838  | 1228  | 9.15  | C_unshiu_00078 | 258492 | 259719 | 1228  | 0.25  | 100   |
| scaffold01898 | 1905  | 4892  | 2988  | 22.29 | C_unshiu_00941 | 89748  | 86760  | 2989  | 2.66  | 99.53 |
| scaffold01898 | 6155  | 9421  | 3267  | 24.37 | C_unshiu_00941 | 85138  | 81866  | 3273  | 2.91  | 99.18 |
| scaffold01898 | 9437  | 12050 | 2614  | 19.5  | C_unshiu_00941 | 80382  | 77769  | 2614  | 2.33  | 99.89 |
| scaffold01899 | 2611  | 4437  | 1827  | 13.63 | C_unshiu_02712 | 5126   | 3300   | 1827  | 9.29  | 99.89 |
| scaffold01899 | 8728  | 12136 | 3409  | 25.43 | C_unshiu_00513 | 142854 | 146262 | 3409  | 1.82  | 99.97 |
| scaffold01900 | 1     | 1605  | 1605  | 11.99 | C_unshiu_01918 | 503    | 2110   | 1608  | 3.65  | 99.32 |
| scaffold01900 | 904   | 2611  | 1708  | 12.76 | C_unshiu_01891 | 8841   | 7136   | 1706  | 3.79  | 99.53 |
| scaffold01900 | 6988  | 8771  | 1784  | 13.32 | C_unshiu_01891 | 1786   | 1      | 1786  | 3.97  | 99.44 |
| scaffold01901 | 7159  | 8900  | 1742  | 13.04 | C_unshiu_01035 | 32427  | 34170  | 1744  | 1.7   | 99.54 |
| scaffold01901 | 12160 | 13169 | 1010  | 7.56  | C_unshiu_00016 | 283751 | 284760 | 1010  | 0.12  | 98.91 |
| scaffold01902 | 9290  | 12296 | 3007  | 22.51 | C_unshiu_01596 | 2871   | 5898   | 3028  | 5.25  | 98.94 |
| scaffold01903 | 1     | 1952  | 1952  | 14.63 | C_unshiu_00849 | 121976 | 120025 | 1952  | 1.59  | 99.03 |
| scaffold01903 | 5211  | 6969  | 1759  | 13.18 | C_unshiu_00852 | 84422  | 82663  | 1760  | 1.44  | 99.6  |
| scaffold01904 | 2719  | 8553  | 5835  | 43.77 | C_unshiu_02377 | 1648   | 7476   | 5829  | 21.02 | 99.59 |
| scaffold01904 | 9113  | 11838 | 2726  | 20.45 | C_unshiu_02377 | 8076   | 10806  | 2731  | 9.85  | 98.65 |
| scaffold01905 | 2482  | 4143  | 1662  | 12.47 | C_unshiu_00764 | 56678  | 58339  | 1662  | 1.24  | 100   |
| scaffold01905 | 9971  | 13333 | 3363  | 25.22 | C_unshiu_02109 | 24574  | 27944  | 3371  | 9.3   | 98.55 |
| scaffold01906 | 1     | 11475 | 11475 | 86.08 | C_unshiu_02564 | 13766  | 2282   | 11485 | 49.85 | 98.42 |
| scaffold01908 | 1     | 1088  | 1088  | 8.2   | C_unshiu_00003 | 337275 | 336188 | 1088  | 0.08  | 100   |
| scaffold01908 | 1089  | 3030  | 1942  | 14.63 | C_unshiu_00715 | 126905 | 128846 | 1942  | 1.37  | 100   |
| scaffold01908 | 3151  | 4687  | 1537  | 11.58 | C_unshiu_00003 | 333625 | 332098 | 1528  | 0.12  | 98.18 |
| scaffold01908 | 4687  | 6216  | 1530  | 11.53 | C_unshiu_00003 | 331930 | 330393 | 1538  | 0.12  | 99.29 |
| scaffold01908 | 12009 | 13275 | 1267  | 9.54  | C_unshiu_01584 | 24670  | 25935  | 1266  | 2.17  | 98.26 |
| scaffold01909 | 1     | 3109  | 3109  | 23.45 | C_unshiu_02974 | 10111  | 7003   | 3109  | 22.67 | 99.71 |
| scaffold01909 | 3110  | 4510  | 1401  | 10.57 | C_unshiu_00872 | 57789  | 59189  | 1401  | 1.17  | 100   |
| scaffold01909 | 8200  | 9695  | 1496  | 11.28 | C_unshiu_02974 | 1490   | 1      | 1490  | 10.87 | 98.13 |
| scaffold01910 | 1     | 7918  | 7918  | 59.68 | C_unshiu_01390 | 45072  | 37146  | 7927  | 11.17 | 99.67 |
| scaffold01910 | 10095 | 11838 | 1744  | 13.14 | C_unshiu_01390 | 34029  | 32284  | 1746  | 2.46  | 98.28 |
| scaffold01911 | 1093  | 5739  | 4647  | 35.07 | C_unshiu_01312 | 61328  | 56701  | 4628  | 6.08  | 98.99 |
| scaffold01911 | 5943  | 13041 | 7099  | 53.58 | C_unshiu_01312 | 55887  | 48771  | 7117  | 9.35  | 99.1  |
| scaffold01912 | 11335 | 13207 | 1873  | 14.18 | C_unshiu_00305 | 96074  | 97965  | 1892  | 0.72  | 98.73 |
| scaffold01913 | 5673  | 13245 | 7573  | 57.18 | C_unshiu_01441 | 6399   | 13971  | 7573  | 11.24 | 100   |
| scaffold01914 | 60    | 5668  | 5609  | 42.36 | C_unshiu_00106 | 65209  | 70817  | 5609  | 1.25  | 99.93 |
| scaffold01914 | 11307 | 12727 | 1421  | 10.73 | C_unshiu_00106 | 75544  | 76964  | 1421  | 0.32  | 100   |
| scaffold01915 | 5342  | 7382  | 2041  | 15.42 | C_unshiu_00661 | 46407  | 48447  | 2041  | 1.33  | 100   |
| scaffold01915 | 5381  | 7384  | 2004  | 15.14 | C_unshiu_00674 | 25802  | 23799  | 2004  | 1.34  | 100   |
| scaffold01916 | 1     | 2065  | 2065  | 15.61 | C_unshiu_00121 | 16737  | 18808  | 2072  | 0.49  | 99.23 |
| scaffold01916 | 2503  | 4101  | 1599  | 12.09 | C_unshiu_00121 | 19451  | 21040  | 1590  | 0.38  | 99.31 |

|               |       |       |       |       |                |         |         |       |       |       |
|---------------|-------|-------|-------|-------|----------------|---------|---------|-------|-------|-------|
| scaffold01916 | 5032  | 6489  | 1458  | 11.02 | C_unshiu_00121 | 23493   | 24950   | 1458  | 0.35  | 100   |
| scaffold01916 | 8673  | 10033 | 1361  | 10.29 | C_unshiu_00121 | 27147   | 28520   | 1374  | 0.33  | 98.33 |
| scaffold01916 | 11852 | 13227 | 1376  | 10.4  | C_unshiu_00121 | 30346   | 31720   | 1375  | 0.33  | 99.78 |
| scaffold01917 | 1     | 3094  | 3094  | 23.41 | C_unshiu_00025 | 593353  | 596430  | 3078  | 0.41  | 98.51 |
| scaffold01917 | 5902  | 6920  | 1019  | 7.71  | C_unshiu_00025 | 599941  | 600960  | 1020  | 0.14  | 98.92 |
| scaffold01919 | 388   | 1760  | 1373  | 10.4  | C_unshiu_01293 | 45495   | 44117   | 1379  | 1.77  | 98.55 |
| scaffold01920 | 7     | 13197 | 13191 | 99.95 | C_unshiu_02213 | 25354   | 12168   | 13187 | 40.15 | 99.82 |
| scaffold01921 | 541   | 10858 | 10318 | 78.14 | C_unshiu_01363 | 32280   | 21963   | 10318 | 14.06 | 99.98 |
| scaffold01922 | 1     | 9172  | 9172  | 69.47 | C_unshiu_00742 | 128799  | 119627  | 9173  | 6.68  | 99.99 |
| scaffold01922 | 9179  | 10627 | 1449  | 10.98 | C_unshiu_00742 | 118964  | 117516  | 1449  | 1.06  | 100   |
| scaffold01923 | 3724  | 6862  | 3139  | 23.79 | C_unshiu_02013 | 13888   | 10750   | 3139  | 7.82  | 100   |
| scaffold01924 | 767   | 5171  | 4405  | 33.43 | C_unshiu_01311 | 59033   | 63438   | 4406  | 5.78  | 99.21 |
| scaffold01924 | 10629 | 12239 | 1611  | 12.23 | C_unshiu_01311 | 69732   | 71342   | 1611  | 2.12  | 99.07 |
| scaffold01926 | 11732 | 13008 | 1277  | 9.69  | C_unshiu_00517 | 34185   | 32910   | 1276  | 0.69  | 99.3  |
| scaffold01927 | 6559  | 10561 | 4003  | 30.38 | C_unshiu_02675 | 10295   | 14297   | 4003  | 19.63 | 99.48 |
| scaffold01927 | 11378 | 12525 | 1148  | 8.71  | C_unshiu_00069 | 176713  | 177861  | 1149  | 0.22  | 99.13 |
| scaffold01928 | 4407  | 6211  | 1805  | 13.72 | C_unshiu_01112 | 94057   | 92252   | 1806  | 1.91  | 99.56 |
| scaffold01928 | 9110  | 10138 | 1029  | 7.82  | C_unshiu_01112 | 88776   | 87748   | 1029  | 1.09  | 98.45 |
| scaffold01928 | 11190 | 13154 | 1965  | 14.94 | C_unshiu_01112 | 87156   | 85191   | 1966  | 2.08  | 99.8  |
| scaffold01929 | 3338  | 5277  | 1940  | 14.81 | C_unshiu_00245 | 15193   | 13253   | 1941  | 0.65  | 99.54 |
| scaffold01929 | 9276  | 13103 | 3828  | 29.21 | C_unshiu_00627 | 160045  | 156210  | 3836  | 2.38  | 99.06 |
| scaffold01930 | 1     | 3162  | 3162  | 24.14 | C_unshiu_01859 | 13881   | 10691   | 3191  | 6.91  | 98.56 |
| scaffold01930 | 3166  | 4331  | 1166  | 8.9   | C_unshiu_00542 | 112015  | 110850  | 1166  | 0.65  | 99.74 |
| scaffold01930 | 4313  | 5993  | 1681  | 12.84 | C_unshiu_01859 | 10466   | 8774    | 1693  | 3.66  | 98.52 |
| scaffold01931 | 6555  | 9120  | 2566  | 19.6  | C_unshiu_02698 | 11937   | 14502   | 2566  | 12.9  | 99.42 |
| scaffold01931 | 9145  | 10606 | 1462  | 11.17 | C_unshiu_00047 | 141098  | 139635  | 1464  | 0.23  | 98.57 |
| scaffold01932 | 1     | 1186  | 1186  | 9.06  | C_unshiu_00269 | 5513    | 6697    | 1185  | 0.42  | 99.92 |
| scaffold01932 | 2270  | 3476  | 1207  | 9.22  | C_unshiu_00575 | 82344   | 83550   | 1207  | 0.7   | 100   |
| scaffold01932 | 7736  | 13091 | 5356  | 40.91 | C_unshiu_00269 | 13338   | 18690   | 5353  | 1.9   | 98.81 |
| scaffold01933 | 10456 | 12405 | 1950  | 14.92 | C_unshiu_00534 | 151662  | 153607  | 1946  | 1.07  | 98.26 |
| scaffold01935 | 7785  | 10540 | 2756  | 21.14 | C_unshiu_00271 | 27135   | 29890   | 2756  | 0.98  | 100   |
| scaffold01935 | 10534 | 13035 | 2502  | 19.19 | C_unshiu_00227 | 262144  | 264645  | 2502  | 0.81  | 100   |
| scaffold01936 | 1     | 2355  | 2355  | 18.07 | C_unshiu_02062 | 14926   | 12575   | 2352  | 6.15  | 99.66 |
| scaffold01936 | 2369  | 3409  | 1041  | 7.99  | C_unshiu_02062 | 12185   | 11145   | 1041  | 2.72  | 100   |
| scaffold01936 | 4496  | 13034 | 8539  | 65.51 | C_unshiu_02062 | 9629    | 1084    | 8546  | 22.35 | 99.89 |
| scaffold01938 | 11916 | 13009 | 1094  | 8.41  | C_unshiu_01025 | 21230   | 22323   | 1094  | 1.06  | 99.27 |
| scaffold01940 | 1     | 12994 | 12994 | 100   | C_unshiu_00029 | 662857  | 675813  | 12957 | 1.81  | 99.52 |
| scaffold01941 | 1     | 2699  | 2699  | 20.92 | C_unshiu_00437 | 4761    | 7448    | 2688  | 1.26  | 99.11 |
| scaffold01941 | 11069 | 12479 | 1411  | 10.94 | C_unshiu_00166 | 241924  | 240516  | 1409  | 0.38  | 99.43 |
| scaffold01942 | 1     | 2095  | 2095  | 16.23 | C_unshiu_00396 | 172603  | 170507  | 2097  | 0.94  | 98.95 |
| scaffold01943 | 5336  | 8349  | 3014  | 23.42 | C_unshiu_00276 | 50070   | 47055   | 3016  | 1.08  | 98.38 |
| scaffold01944 | 4299  | 5648  | 1350  | 10.48 | C_unshiu_01223 | 38020   | 36672   | 1349  | 1.62  | 99.48 |
| scaffold01944 | 6966  | 9666  | 2701  | 20.96 | C_unshiu_01223 | 35290   | 32590   | 2701  | 3.24  | 99.22 |
| scaffold01945 | 1618  | 3615  | 1998  | 15.51 | C_unshiu_00372 | 185710  | 183726  | 1985  | 0.86  | 98.95 |
| scaffold01946 | 7028  | 10341 | 3314  | 25.76 | C_unshiu_00647 | 107088  | 110420  | 3333  | 2.12  | 98.35 |
| scaffold01946 | 10334 | 11552 | 1219  | 9.48  | C_unshiu_00151 | 225122  | 226340  | 1219  | 0.32  | 100   |
| scaffold01947 | 3066  | 5843  | 2778  | 21.68 | C_unshiu_00008 | 1062825 | 1065600 | 2776  | 0.26  | 99.39 |
| scaffold01947 | 11445 | 12816 | 1372  | 10.71 | C_unshiu_00008 | 1071689 | 1073060 | 1372  | 0.13  | 99.93 |
| scaffold01948 | 6021  | 11994 | 5974  | 46.58 | C_unshiu_00370 | 222920  | 228877  | 5958  | 2.56  | 98.18 |
| scaffold01949 | 1     | 1169  | 1169  | 9.12  | C_unshiu_01232 | 55095   | 56280   | 1186  | 1.44  | 98.23 |
| scaffold01949 | 10545 | 12825 | 2281  | 17.79 | C_unshiu_02232 | 9610    | 11890   | 2281  | 7.09  | 100   |
| scaffold01950 | 6395  | 12806 | 6412  | 50.07 | C_unshiu_00983 | 30625   | 37038   | 6414  | 5.92  | 99.92 |
| scaffold01951 | 1     | 1841  | 1841  | 14.38 | C_unshiu_01294 | 21369   | 23209   | 1841  | 2.36  | 98.64 |
| scaffold01952 | 10352 | 12714 | 2363  | 18.47 | C_unshiu_01103 | 88066   | 90436   | 2371  | 2.47  | 98.32 |
| scaffold01953 | 7896  | 10746 | 2851  | 22.28 | C_unshiu_00178 | 84292   | 87151   | 2860  | 0.79  | 98.12 |
| scaffold01953 | 11662 | 12794 | 1133  | 8.86  | C_unshiu_00178 | 87561   | 88693   | 1133  | 0.31  | 100   |
| scaffold01954 | 1     | 2746  | 2746  | 21.52 | C_unshiu_00362 | 98053   | 100805  | 2753  | 1.16  | 99.38 |
| scaffold01956 | 8657  | 12735 | 4079  | 32.03 | C_unshiu_01052 | 66859   | 70937   | 4079  | 4.09  | 100   |
| scaffold01957 | 748   | 2114  | 1367  | 10.74 | C_unshiu_01598 | 6241    | 7593    | 1353  | 2.35  | 98.39 |
| scaffold01959 | 1     | 1476  | 1476  | 11.63 | C_unshiu_01700 | 8917    | 7440    | 1478  | 2.81  | 99.53 |
| scaffold01959 | 3856  | 5506  | 1651  | 13.01 | C_unshiu_01700 | 4607    | 2957    | 1651  | 3.14  | 99.46 |
| scaffold01959 | 6975  | 8074  | 1100  | 8.67  | C_unshiu_01058 | 87235   | 88341   | 1107  | 1.11  | 98.11 |
| scaffold01959 | 10591 | 12686 | 2096  | 16.52 | C_unshiu_01058 | 91066   | 93165   | 2100  | 2.11  | 98.81 |
| scaffold01960 | 9991  | 12668 | 2678  | 21.14 | C_unshiu_00623 | 31568   | 34254   | 2687  | 1.66  | 99.59 |
| scaffold01961 | 1643  | 3336  | 1694  | 13.37 | C_unshiu_00948 | 92525   | 90832   | 1694  | 1.52  | 100   |
| scaffold01961 | 7792  | 9053  | 1262  | 9.96  | C_unshiu_01094 | 34551   | 33291   | 1261  | 1.31  | 98.26 |
| scaffold01962 | 11493 | 12663 | 1171  | 9.25  | C_unshiu_00489 | 85912   | 84731   | 1182  | 0.6   | 98.05 |
| scaffold01963 | 5749  | 10991 | 5243  | 41.53 | C_unshiu_01544 | 24451   | 19192   | 5260  | 8.64  | 99.13 |
| scaffold01964 | 449   | 2048  | 1600  | 12.67 | C_unshiu_00338 | 19932   | 21531   | 1600  | 0.64  | 99.13 |
| scaffold01964 | 9228  | 10483 | 1256  | 9.95  | C_unshiu_00076 | 263042  | 261786  | 1257  | 0.25  | 98.73 |
| scaffold01965 | 7352  | 8584  | 1233  | 9.77  | C_unshiu_00798 | 97347   | 98578   | 1232  | 0.96  | 99.51 |
| scaffold01965 | 11502 | 12616 | 1115  | 8.84  | C_unshiu_00798 | 100411  | 101525  | 1115  | 0.87  | 100   |
| scaffold01966 | 1     | 1407  | 1407  | 11.16 | C_unshiu_00609 | 72613   | 71199   | 1415  | 0.86  | 99.43 |
| scaffold01966 | 1572  | 2618  | 1047  | 8.31  | C_unshiu_01141 | 90217   | 89172   | 1046  | 1.14  | 99.71 |
| scaffold01966 | 2926  | 4193  | 1268  | 10.06 | C_unshiu_01141 | 89172   | 87903   | 1270  | 1.38  | 99.37 |
| scaffold01967 | 6756  | 7757  | 1002  | 7.99  | C_unshiu_00051 | 369459  | 368458  | 1002  | 0.17  | 99.9  |
| scaffold01968 | 1     | 1217  | 1217  | 9.71  | C_unshiu_00369 | 163039  | 161824  | 1216  | 0.52  | 98.69 |
| scaffold01968 | 3928  | 6114  | 2187  | 17.45 | C_unshiu_00369 | 158678  | 156490  | 2189  | 0.94  | 98.68 |
| scaffold01968 | 10454 | 11457 | 1004  | 8.01  | C_unshiu_00369 | 152534  | 151528  | 1007  | 0.43  | 99.5  |

|               |       |       |       |       |                |        |        |       |       |       |
|---------------|-------|-------|-------|-------|----------------|--------|--------|-------|-------|-------|
| scaffold01968 | 11457 | 12534 | 1078  | 8.6   | C_unshiu_00369 | 151338 | 150261 | 1078  | 0.46  | 100   |
| scaffold01969 | 1     | 1124  | 1124  | 8.97  | C_unshiu_00720 | 69901  | 68778  | 1124  | 0.79  | 100   |
| scaffold01969 | 3452  | 12534 | 9083  | 72.47 | C_unshiu_00720 | 66485  | 57403  | 9083  | 6.42  | 100   |
| scaffold01970 | 102   | 2950  | 2849  | 22.74 | C_unshiu_02940 | 14727  | 11914  | 2814  | 19.11 | 98.07 |
| scaffold01970 | 3395  | 4427  | 1033  | 8.25  | C_unshiu_02940 | 11626  | 10594  | 1033  | 7.01  | 100   |
| scaffold01970 | 4436  | 5549  | 1114  | 8.89  | C_unshiu_02940 | 10297  | 9184   | 1114  | 7.56  | 99.64 |
| scaffold01970 | 7648  | 9502  | 1855  | 14.81 | C_unshiu_02940 | 7057   | 5203   | 1855  | 12.6  | 100   |
| scaffold01971 | 9777  | 12511 | 2735  | 21.86 | C_unshiu_00893 | 81459  | 78707  | 2753  | 2.34  | 98.77 |
| scaffold01972 | 1     | 11072 | 11072 | 88.52 | C_unshiu_00701 | 96111  | 107181 | 11071 | 7.71  | 99.89 |
| scaffold01976 | 882   | 2492  | 1611  | 12.9  | C_unshiu_01073 | 34936  | 36546  | 1611  | 1.63  | 99.26 |
| scaffold01976 | 5732  | 7602  | 1871  | 14.98 | C_unshiu_01073 | 39805  | 41674  | 1870  | 1.9   | 98.4  |
| scaffold01976 | 7241  | 10119 | 2879  | 23.05 | C_unshiu_00998 | 106440 | 103557 | 2884  | 2.71  | 98.96 |
| scaffold01977 | 3360  | 7332  | 3973  | 31.81 | C_unshiu_00003 | 736514 | 740489 | 3976  | 0.3   | 99.65 |
| scaffold01978 | 1     | 7048  | 7048  | 56.49 | C_unshiu_00240 | 270480 | 277532 | 7053  | 2.34  | 98.08 |
| scaffold01979 | 1     | 1249  | 1249  | 10.02 | C_unshiu_00193 | 265244 | 266493 | 1250  | 0.37  | 99.92 |
| scaffold01979 | 2382  | 4131  | 1750  | 14.04 | C_unshiu_00895 | 59874  | 58125  | 1750  | 1.49  | 99.94 |
| scaffold01979 | 4164  | 8956  | 4793  | 38.46 | C_unshiu_01303 | 33248  | 38040  | 4793  | 6.2   | 100   |
| scaffold01980 | 8797  | 11011 | 2215  | 12.9  | C_unshiu_00104 | 343424 | 345638 | 2215  | 0.49  | 100   |
| scaffold01980 | 11005 | 12439 | 1435  | 11.54 | C_unshiu_00166 | 33310  | 31856  | 1455  | 0.39  | 98.21 |
| scaffold01982 | 3118  | 9799  | 6682  | 53.75 | C_unshiu_00239 | 287420 | 294101 | 6682  | 2.21  | 99.88 |
| scaffold01985 | 1     | 12378 | 12378 | 100   | C_unshiu_00351 | 133029 | 120652 | 12378 | 5.15  | 99.97 |
| scaffold01987 | 1     | 1438  | 1438  | 11.6  | C_unshiu_01362 | 20985  | 22422  | 1438  | 1.96  | 100   |
| scaffold01987 | 3694  | 5590  | 1897  | 15.3  | C_unshiu_01362 | 25439  | 27335  | 1897  | 2.58  | 99.74 |
| scaffold01988 | 2     | 1941  | 1940  | 15.66 | C_unshiu_00124 | 238828 | 236892 | 1937  | 0.46  | 98.45 |
| scaffold01988 | 3162  | 4521  | 1360  | 10.98 | C_unshiu_00124 | 237322 | 235963 | 1360  | 0.32  | 99.93 |
| scaffold01988 | 8541  | 12389 | 3849  | 31.07 | C_unshiu_00094 | 377673 | 373846 | 3828  | 0.82  | 98.26 |
| scaffold01989 | 1     | 1356  | 1356  | 10.95 | C_unshiu_00114 | 211915 | 213270 | 1356  | 0.31  | 100   |
| scaffold01989 | 6984  | 8981  | 1998  | 16.14 | C_unshiu_00114 | 220495 | 222491 | 1997  | 0.46  | 99.75 |
| scaffold01989 | 10647 | 11825 | 1179  | 9.52  | C_unshiu_00114 | 224725 | 225910 | 1186  | 0.27  | 99.41 |
| scaffold01990 | 1     | 7802  | 7802  | 63.08 | C_unshiu_00854 | 19895  | 27692  | 7798  | 6.38  | 99.35 |
| scaffold01990 | 10341 | 12257 | 1917  | 15.5  | C_unshiu_00854 | 29560  | 31473  | 1914  | 1.56  | 99.17 |
| scaffold01991 | 1     | 7656  | 7656  | 61.91 | C_unshiu_00041 | 321341 | 313678 | 7664  | 1.17  | 98.7  |
| scaffold01993 | 9441  | 10554 | 1114  | 9.02  | C_unshiu_00030 | 74713  | 73600  | 1114  | 0.16  | 100   |
| scaffold01994 | 4990  | 6073  | 1084  | 8.79  | C_unshiu_00846 | 95411  | 94327  | 1085  | 0.88  | 98.99 |
| scaffold01994 | 7771  | 11100 | 3330  | 26.99 | C_unshiu_00757 | 38076  | 34747  | 3330  | 2.47  | 100   |
| scaffold01995 | 3531  | 4841  | 1311  | 10.63 | C_unshiu_00419 | 175945 | 174635 | 1311  | 0.6   | 100   |
| scaffold01995 | 5322  | 10471 | 5150  | 41.74 | C_unshiu_00413 | 101498 | 106647 | 5150  | 2.33  | 99.96 |
| scaffold01996 | 10    | 6478  | 6469  | 52.43 | C_unshiu_02041 | 8649   | 2261   | 6389  | 16.35 | 98.46 |
| scaffold01998 | 1610  | 3057  | 1448  | 11.74 | C_unshiu_01197 | 58031  | 59478  | 1448  | 1.68  | 100   |
| scaffold01998 | 4678  | 6180  | 1503  | 12.19 | C_unshiu_00065 | 84508  | 86012  | 1505  | 0.27  | 99.27 |
| scaffold01998 | 6177  | 7196  | 1020  | 8.27  | C_unshiu_00065 | 82235  | 83261  | 1027  | 0.19  | 98.73 |
| scaffold02001 | 1     | 2281  | 2281  | 18.61 | C_unshiu_01501 | 54859  | 57120  | 2262  | 3.58  | 99.08 |
| scaffold02001 | 2434  | 4338  | 1905  | 15.54 | C_unshiu_01501 | 57112  | 59025  | 1914  | 3.03  | 98.9  |
| scaffold02002 | 3383  | 6905  | 3523  | 28.82 | C_unshiu_00724 | 13596  | 10067  | 3530  | 2.52  | 98.16 |
| scaffold02002 | 9128  | 12224 | 3097  | 25.33 | C_unshiu_00724 | 10071  | 6980   | 3092  | 2.21  | 98.09 |
| scaffold02003 | 114   | 1342  | 1229  | 10.05 | C_unshiu_00104 | 323780 | 325017 | 1238  | 0.27  | 99.03 |
| scaffold02003 | 3887  | 7087  | 3201  | 26.16 | C_unshiu_00902 | 81768  | 78568  | 3201  | 2.75  | 100   |
| scaffold02003 | 7647  | 8848  | 1202  | 9.83  | C_unshiu_00824 | 63650  | 64851  | 1202  | 0.95  | 99.92 |
| scaffold02003 | 8849  | 12234 | 3386  | 27.68 | C_unshiu_00104 | 332009 | 335413 | 3405  | 0.75  | 99.06 |
| scaffold02004 | 177   | 3675  | 3499  | 28.65 | C_unshiu_01553 | 38818  | 42303  | 3486  | 5.77  | 99.46 |
| scaffold02004 | 7377  | 9772  | 2396  | 19.62 | C_unshiu_01553 | 45315  | 47694  | 2380  | 3.94  | 99.25 |
| scaffold02004 | 10590 | 11868 | 1279  | 10.47 | C_unshiu_01553 | 49272  | 50548  | 1277  | 2.11  | 99.84 |
| scaffold02005 | 9194  | 10563 | 1370  | 11.23 | C_unshiu_00025 | 130839 | 132207 | 1369  | 0.18  | 99.2  |
| scaffold02006 | 780   | 2136  | 1357  | 11.13 | C_unshiu_02101 | 20407  | 21760  | 1354  | 3.72  | 99.12 |
| scaffold02006 | 10479 | 12190 | 1712  | 14.04 | C_unshiu_02101 | 31308  | 33015  | 1708  | 4.69  | 99.24 |
| scaffold02008 | 1     | 1302  | 1302  | 10.7  | C_unshiu_01508 | 15257  | 16560  | 1304  | 2.08  | 99.46 |
| scaffold02008 | 4130  | 5134  | 1005  | 8.26  | C_unshiu_00881 | 1      | 1017   | 1017  | 0.85  | 98.13 |
| scaffold02008 | 5095  | 6104  | 1010  | 8.3   | C_unshiu_00024 | 85438  | 84427  | 1012  | 0.13  | 98.62 |
| scaffold02008 | 8317  | 9958  | 1642  | 13.5  | C_unshiu_02191 | 8745   | 10383  | 1639  | 4.89  | 98.17 |
| scaffold02009 | 1     | 5505  | 5505  | 45.33 | C_unshiu_01355 | 66511  | 72016  | 5506  | 7.46  | 99.95 |
| scaffold02009 | 7874  | 11689 | 3816  | 31.43 | C_unshiu_02752 | 1      | 3816   | 3816  | 20.07 | 99.97 |
| scaffold02010 | 1470  | 3146  | 1677  | 13.81 | C_unshiu_03093 | 7920   | 6244   | 1677  | 17.42 | 99.58 |
| scaffold02010 | 3402  | 9069  | 5668  | 46.68 | C_unshiu_03093 | 5654   | 1      | 5654  | 58.74 | 99.59 |
| scaffold02011 | 2656  | 6518  | 3863  | 31.82 | C_unshiu_01013 | 42726  | 38841  | 3886  | 3.72  | 98.25 |
| scaffold02014 | 2455  | 3726  | 1272  | 10.51 | C_unshiu_00009 | 568097 | 566826 | 1272  | 0.12  | 99.84 |
| scaffold02014 | 4439  | 11373 | 6935  | 57.31 | C_unshiu_00127 | 161591 | 168569 | 6979  | 1.68  | 98.08 |
| scaffold02015 | 1     | 1289  | 1289  | 10.66 | C_unshiu_01587 | 29163  | 30458  | 1296  | 2.22  | 98.77 |
| scaffold02015 | 3142  | 4279  | 1138  | 9.41  | C_unshiu_00865 | 14799  | 13661  | 1139  | 0.94  | 99.47 |
| scaffold02015 | 6457  | 7856  | 1400  | 11.58 | C_unshiu_02708 | 2780   | 4180   | 1401  | 7.1   | 99.79 |
| scaffold02015 | 10307 | 12095 | 1789  | 14.79 | C_unshiu_02708 | 6964   | 8752   | 1789  | 9.07  | 99.39 |
| scaffold02018 | 2894  | 8080  | 5187  | 43.1  | C_unshiu_00705 | 88695  | 83503  | 5193  | 3.63  | 98.91 |
| scaffold02018 | 10503 | 12034 | 1532  | 12.73 | C_unshiu_02306 | 19587  | 18065  | 1523  | 5.14  | 98.83 |
| scaffold02019 | 1700  | 3641  | 1942  | 16.16 | C_unshiu_00692 | 71168  | 73120  | 1953  | 1.34  | 99.18 |
| scaffold02019 | 8951  | 10120 | 1170  | 9.73  | C_unshiu_00829 | 83454  | 82285  | 1170  | 0.94  | 100   |
| scaffold02020 | 1     | 5017  | 5017  | 41.74 | C_unshiu_00447 | 197850 | 202892 | 5043  | 2.42  | 98.32 |
| scaffold02021 | 1     | 12016 | 12016 | 100   | C_unshiu_01420 | 46320  | 34305  | 12016 | 17.31 | 100   |
| scaffold02022 | 4383  | 9370  | 4988  | 41.54 | C_unshiu_00124 | 15588  | 10619  | 4970  | 1.19  | 98.32 |
| scaffold02023 | 3279  | 4383  | 1105  | 9.22  | C_unshiu_00839 | 73679  | 72576  | 1104  | 0.89  | 99.19 |
| scaffold02024 | 1     | 1293  | 1293  | 10.79 | C_unshiu_00134 | 333863 | 335164 | 1302  | 0.32  | 98.92 |

|               |       |       |      |       |                |        |        |      |       |       |
|---------------|-------|-------|------|-------|----------------|--------|--------|------|-------|-------|
| scaffold02025 | 1     | 6622  | 6622 | 55.47 | C_unshiu_00489 | 126027 | 132697 | 6671 | 3.4   | 98.07 |
| scaffold02026 | 9623  | 10843 | 1221 | 10.21 | C_unshiu_00084 | 395999 | 394778 | 1222 | 0.26  | 99.35 |
| scaffold02028 | 2195  | 11883 | 9689 | 81.54 | C_unshiu_00177 | 320657 | 310967 | 9691 | 2.68  | 99.85 |
| scaffold02029 | 1     | 2138  | 2138 | 17.91 | C_unshiu_01430 | 2151   | 1      | 2151 | 3.15  | 98.61 |
| scaffold02029 | 7748  | 9547  | 1800 | 15.08 | C_unshiu_01628 | 4256   | 2457   | 1800 | 3.21  | 98.89 |
| scaffold02030 | 9154  | 10340 | 1187 | 9.95  | C_unshiu_00032 | 701740 | 700554 | 1187 | 0.17  | 99.92 |
| scaffold02031 | 1     | 1276  | 1276 | 10.7  | C_unshiu_01982 | 30775  | 29502  | 1274 | 3.09  | 99.84 |
| scaffold02031 | 2730  | 8396  | 5667 | 47.54 | C_unshiu_01982 | 27603  | 21945  | 5659 | 13.74 | 99.82 |
| scaffold02032 | 1     | 3097  | 3097 | 25.98 | C_unshiu_00088 | 404387 | 401291 | 3097 | 0.66  | 99.58 |
| scaffold02033 | 7581  | 11901 | 4321 | 36.31 | C_unshiu_00458 | 100915 | 96635  | 4281 | 2.09  | 98.22 |
| scaffold02034 | 4019  | 9174  | 5156 | 43.4  | C_unshiu_00059 | 113535 | 118690 | 5156 | 0.88  | 100   |
| scaffold02034 | 9412  | 11880 | 2469 | 20.78 | C_unshiu_00447 | 146634 | 149102 | 2469 | 1.18  | 100   |
| scaffold02035 | 1     | 5739  | 5739 | 48.33 | C_unshiu_01681 | 6844   | 12582  | 5739 | 10.74 | 100   |
| scaffold02035 | 5741  | 11875 | 6135 | 61.36 | C_unshiu_01681 | 11051  | 17159  | 6109 | 11.43 | 98.5  |
| scaffold02036 | 730   | 5631  | 4902 | 41.33 | C_unshiu_00249 | 116823 | 111912 | 4912 | 1.66  | 98.88 |
| scaffold02036 | 9033  | 10424 | 1392 | 11.74 | C_unshiu_02429 | 19714  | 18323  | 1392 | 5.21  | 98.64 |
| scaffold02036 | 10814 | 11860 | 1047 | 8.83  | C_unshiu_02429 | 18624  | 17578  | 1047 | 3.92  | 99.9  |
| scaffold02037 | 10097 | 11868 | 1772 | 14.93 | C_unshiu_00154 | 176835 | 175052 | 1784 | 0.47  | 98.99 |
| scaffold02039 | 5966  | 11842 | 5877 | 49.63 | C_unshiu_00321 | 4779   | 10656  | 5878 | 2.3   | 99.69 |
| scaffold02040 | 2632  | 4796  | 2165 | 18.29 | C_unshiu_00238 | 231104 | 233238 | 2135 | 0.7   | 98.02 |
| scaffold02041 | 36    | 1106  | 1071 | 9.05  | C_unshiu_00835 | 28778  | 27700  | 1079 | 0.87  | 98.98 |
| scaffold02042 | 1     | 2103  | 2103 | 17.78 | C_unshiu_01965 | 9249   | 7144   | 2106 | 5.01  | 99.86 |
| scaffold02042 | 7473  | 9834  | 2362 | 19.97 | C_unshiu_01965 | 29227  | 26862  | 2366 | 5.63  | 99.58 |
| scaffold02042 | 10753 | 11828 | 1076 | 9.1   | C_unshiu_01965 | 25673  | 24598  | 1076 | 2.56  | 99.91 |
| scaffold02044 | 8267  | 11779 | 3513 | 29.82 | C_unshiu_01758 | 37123  | 33611  | 3513 | 7.03  | 100   |
| scaffold02045 | 703   | 1961  | 1259 | 10.73 | C_unshiu_01126 | 23678  | 22420  | 1259 | 1.35  | 99.13 |
| scaffold02045 | 5004  | 6561  | 1558 | 13.27 | C_unshiu_00164 | 232120 | 230560 | 1561 | 0.42  | 98.21 |
| scaffold02045 | 9320  | 11738 | 2419 | 20.61 | C_unshiu_01126 | 22340  | 19939  | 2402 | 2.57  | 98.18 |
| scaffold02047 | 4943  | 6991  | 2049 | 17.49 | C_unshiu_00974 | 98605  | 100653 | 2049 | 1.88  | 99.9  |
| scaffold02047 | 8190  | 9554  | 1365 | 11.65 | C_unshiu_00974 | 102428 | 103792 | 1365 | 1.25  | 100   |
| scaffold02048 | 1     | 8805  | 8805 | 75.19 | C_unshiu_01592 | 41441  | 50246  | 8806 | 15.24 | 99.56 |
| scaffold02048 | 9362  | 11710 | 2349 | 20.06 | C_unshiu_01592 | 51200  | 53548  | 2349 | 4.06  | 99.83 |
| scaffold02049 | 7982  | 10056 | 2075 | 17.77 | C_unshiu_00632 | 63193  | 61120  | 2074 | 1.29  | 99.33 |
| scaffold02051 | 10    | 1177  | 1168 | 9.98  | C_unshiu_02473 | 9526   | 10692  | 1167 | 4.58  | 99.91 |
| scaffold02054 | 1     | 2668  | 2668 | 22.84 | C_unshiu_02640 | 12045  | 9374   | 2672 | 12.63 | 98.95 |
| scaffold02054 | 4420  | 5895  | 1476 | 12.64 | C_unshiu_00656 | 55159  | 56634  | 1476 | 0.95  | 100   |
| scaffold02054 | 5913  | 7088  | 1176 | 10.07 | C_unshiu_00656 | 60539  | 61714  | 1176 | 0.76  | 100   |
| scaffold02055 | 4317  | 7738  | 3422 | 29.33 | C_unshiu_01829 | 39643  | 36221  | 3423 | 7.22  | 99.77 |
| scaffold02056 | 1572  | 8646  | 7075 | 60.65 | C_unshiu_00988 | 62575  | 55519  | 7057 | 6.55  | 99.32 |
| scaffold02056 | 8734  | 11665 | 2932 | 25.13 | C_unshiu_00988 | 55420  | 52493  | 2928 | 2.72  | 99.56 |
| scaffold02057 | 1060  | 4260  | 3201 | 27.48 | C_unshiu_00789 | 83505  | 80305  | 3201 | 2.46  | 99.97 |
| scaffold02058 | 1715  | 3089  | 1375 | 11.83 | C_unshiu_01571 | 8438   | 9812   | 1375 | 2.33  | 100   |
| scaffold02058 | 3084  | 5204  | 2121 | 18.25 | C_unshiu_02012 | 12637  | 10508  | 2130 | 5.29  | 98.27 |
| scaffold02058 | 8292  | 9929  | 1638 | 14.09 | C_unshiu_02012 | 5668   | 7326   | 1659 | 4.12  | 98.31 |
| scaffold02058 | 9930  | 11624 | 1695 | 14.58 | C_unshiu_02012 | 5672   | 3978   | 1695 | 4.21  | 99.76 |
| scaffold02061 | 374   | 1628  | 1255 | 10.81 | C_unshiu_00663 | 22262  | 23507  | 1246 | 0.81  | 98.33 |
| scaffold02062 | 1     | 3133  | 3133 | 26.96 | C_unshiu_00776 | 30065  | 26930  | 3136 | 2.38  | 99.46 |
| scaffold02062 | 8097  | 11298 | 3202 | 27.56 | C_unshiu_00776 | 21958  | 18758  | 3201 | 2.43  | 98.75 |
| scaffold02062 | 8325  | 11619 | 3295 | 28.36 | C_unshiu_01292 | 4820   | 8119   | 3300 | 4.22  | 99.36 |
| scaffold02063 | 7440  | 8910  | 1471 | 12.68 | C_unshiu_00007 | 900453 | 901920 | 1468 | 0.13  | 99.39 |
| scaffold02064 | 6184  | 11606 | 5423 | 46.73 | C_unshiu_00697 | 113372 | 118813 | 5442 | 3.78  | 99.1  |
| scaffold02065 | 1599  | 5376  | 3778 | 32.64 | C_unshiu_00350 | 184619 | 188396 | 3778 | 1.56  | 99.81 |
| scaffold02065 | 6593  | 7596  | 1004 | 8.68  | C_unshiu_00264 | 32140  | 33143  | 1004 | 0.35  | 99.6  |
| scaffold02065 | 10442 | 11573 | 1132 | 9.78  | C_unshiu_00264 | 36630  | 37761  | 1132 | 0.4   | 99.73 |
| scaffold02066 | 790   | 6626  | 5837 | 50.47 | C_unshiu_02346 | 5831   | 1      | 5831 | 20.53 | 99.78 |
| scaffold02067 | 1     | 6074  | 6074 | 52.53 | C_unshiu_00414 | 102447 | 108522 | 6076 | 2.75  | 99.23 |
| scaffold02067 | 4744  | 6256  | 1513 | 13.09 | C_unshiu_02733 | 14482  | 15996  | 1515 | 7.87  | 99.67 |
| scaffold02067 | 6278  | 10417 | 4140 | 35.81 | C_unshiu_00414 | 108202 | 112341 | 4140 | 1.88  | 99.9  |
| scaffold02067 | 10421 | 11562 | 1142 | 9.88  | C_unshiu_00165 | 74930  | 76073  | 1144 | 0.31  | 99.83 |
| scaffold02068 | 9219  | 11556 | 2338 | 20.23 | C_unshiu_01746 | 41969  | 39621  | 2349 | 4.63  | 98.38 |
| scaffold02069 | 1     | 1423  | 1423 | 12.34 | C_unshiu_01078 | 32564  | 31142  | 1423 | 1.45  | 99.72 |
| scaffold02069 | 3500  | 9766  | 6267 | 54.33 | C_unshiu_01078 | 28255  | 21989  | 6267 | 6.39  | 99.97 |
| scaffold02069 | 10375 | 11535 | 1161 | 10.07 | C_unshiu_01078 | 76435  | 75275  | 1161 | 1.18  | 99.48 |
| scaffold02070 | 977   | 2040  | 1064 | 9.23  | C_unshiu_00020 | 512334 | 511271 | 1064 | 0.14  | 99.91 |
| scaffold02071 | 6595  | 10125 | 3531 | 30.63 | C_unshiu_00427 | 65029  | 68564  | 3536 | 1.63  | 98.14 |
| scaffold02072 | 1     | 2514  | 2514 | 21.88 | C_unshiu_00590 | 1850   | 4363   | 2514 | 1.48  | 100   |
| scaffold02072 | 9265  | 11491 | 2227 | 19.38 | C_unshiu_01994 | 14839  | 12612  | 2228 | 5.46  | 99.69 |
| scaffold02073 | 1     | 1041  | 1041 | 9.04  | C_unshiu_01220 | 62625  | 63665  | 1041 | 1.25  | 99.62 |
| scaffold02073 | 1930  | 3665  | 1736 | 15.08 | C_unshiu_00510 | 183032 | 181297 | 1736 | 0.92  | 99.48 |
| scaffold02073 | 3889  | 5178  | 1290 | 11.2  | C_unshiu_00634 | 99092  | 97803  | 1290 | 0.81  | 100   |
| scaffold02073 | 5815  | 8183  | 2369 | 20.57 | C_unshiu_01220 | 70068  | 72439  | 2372 | 2.84  | 98.99 |
| scaffold02073 | 8178  | 10118 | 1941 | 16.86 | C_unshiu_00521 | 11621  | 13561  | 1941 | 1.05  | 100   |
| scaffold02074 | 2745  | 4951  | 2207 | 19.2  | C_unshiu_00025 | 372340 | 370133 | 2208 | 0.29  | 98.78 |
| scaffold02074 | 5481  | 7203  | 1723 | 14.99 | C_unshiu_00025 | 368368 | 366643 | 1726 | 0.23  | 99.83 |
| scaffold02075 | 265   | 3703  | 3439 | 29.97 | C_unshiu_00089 | 186364 | 189810 | 3447 | 0.73  | 99.1  |
| scaffold02077 | 7057  | 8101  | 1045 | 9.11  | C_unshiu_00272 | 141662 | 142705 | 1044 | 0.37  | 98.37 |
| scaffold02078 | 1     | 2277  | 2277 | 19.85 | C_unshiu_00827 | 103932 | 106208 | 2277 | 1.82  | 99.87 |
| scaffold02078 | 2303  | 11472 | 9170 | 79.93 | C_unshiu_00827 | 106422 | 115591 | 9170 | 7.31  | 99.97 |
| scaffold02080 | 11    | 1740  | 1730 | 15.09 | C_unshiu_00671 | 81266  | 79528  | 1739 | 1.15  | 98.28 |

|               |       |       |       |       |                |        |        |       |       |       |
|---------------|-------|-------|-------|-------|----------------|--------|--------|-------|-------|-------|
| scaffold02080 | 5036  | 6684  | 1649  | 14.39 | C_unshiu_00313 | 86585  | 88233  | 1649  | 0.64  | 100   |
| scaffold02080 | 8821  | 10430 | 1610  | 14.05 | C_unshiu_00671 | 71082  | 69474  | 1609  | 1.06  | 99.32 |
| scaffold02081 | 1     | 1282  | 1282  | 11.2  | C_unshiu_00400 | 158557 | 159842 | 1286  | 0.58  | 99.14 |
| scaffold02081 | 2837  | 6649  | 3813  | 33.32 | C_unshiu_01071 | 84218  | 80406  | 3813  | 3.86  | 100   |
| scaffold02081 | 6951  | 8584  | 1634  | 14.28 | C_unshiu_00400 | 165875 | 167510 | 1636  | 0.73  | 99.08 |
| scaffold02082 | 1     | 1890  | 1890  | 16.52 | C_unshiu_00430 | 126793 | 128682 | 1890  | 0.88  | 99.74 |
| scaffold02083 | 8655  | 10668 | 2014  | 17.61 | C_unshiu_00096 | 307047 | 309060 | 2014  | 0.44  | 98.12 |
| scaffold02085 | 8395  | 10185 | 1791  | 15.67 | C_unshiu_00389 | 59662  | 61452  | 1791  | 0.79  | 100   |
| scaffold02086 | 9755  | 11422 | 1668  | 14.6  | C_unshiu_00057 | 132497 | 134164 | 1668  | 0.28  | 99.94 |
| scaffold02089 | 9114  | 11382 | 2269  | 19.93 | C_unshiu_01761 | 37441  | 35181  | 2261  | 4.53  | 98.46 |
| scaffold02090 | 7145  | 8346  | 1202  | 10.56 | C_unshiu_01623 | 18430  | 19631  | 1202  | 2.13  | 100   |
| scaffold02091 | 1     | 2861  | 2861  | 25.14 | C_unshiu_00271 | 184073 | 181207 | 2867  | 1.02  | 99.48 |
| scaffold02091 | 3847  | 11381 | 7535  | 66.21 | C_unshiu_00271 | 181216 | 173637 | 7580  | 2.7   | 98.23 |
| scaffold02092 | 8081  | 10463 | 2383  | 20.98 | C_unshiu_00454 | 136812 | 134430 | 2383  | 1.15  | 100   |
| scaffold02094 | 835   | 1934  | 1100  | 9.7   | C_unshiu_00251 | 6660   | 7773   | 1114  | 0.38  | 98.03 |
| scaffold02094 | 2170  | 3417  | 1248  | 11    | C_unshiu_00251 | 8598   | 9848   | 1251  | 0.42  | 98.64 |
| scaffold02094 | 5108  | 6478  | 1371  | 12.09 | C_unshiu_00251 | 11386  | 12756  | 1371  | 0.46  | 100   |
| scaffold02094 | 6472  | 8304  | 1833  | 16.16 | C_unshiu_00438 | 139294 | 141126 | 1833  | 0.86  | 100   |
| scaffold02094 | 8305  | 11330 | 3026  | 26.68 | C_unshiu_00251 | 14485  | 17505  | 3021  | 1.02  | 98.91 |
| scaffold02095 | 3169  | 5025  | 1857  | 16.39 | C_unshiu_03041 | 11357  | 9506   | 1852  | 15.71 | 98.76 |
| scaffold02096 | 1     | 6560  | 6560  | 57.88 | C_unshiu_00097 | 83667  | 77087  | 6581  | 1.43  | 98.62 |
| scaffold02096 | 5342  | 7063  | 1722  | 15.19 | C_unshiu_01288 | 55380  | 53659  | 1722  | 2.2   | 98.66 |
| scaffold02096 | 7343  | 8424  | 1082  | 9.55  | C_unshiu_00097 | 76916  | 75835  | 1082  | 0.23  | 99.91 |
| scaffold02097 | 175   | 1242  | 1068  | 9.44  | C_unshiu_00387 | 137454 | 136385 | 1070  | 0.47  | 98.69 |
| scaffold02097 | 7013  | 8327  | 1315  | 11.62 | C_unshiu_01513 | 26223  | 27537  | 1315  | 2.1   | 98.94 |
| scaffold02097 | 9787  | 11315 | 1529  | 13.51 | C_unshiu_00387 | 128332 | 126804 | 1529  | 0.68  | 99.08 |
| scaffold02098 | 1     | 5099  | 5099  | 45.07 | C_unshiu_00717 | 126515 | 131602 | 5088  | 3.59  | 98.42 |
| scaffold02098 | 5100  | 6278  | 1179  | 10.42 | C_unshiu_00620 | 11089  | 9912   | 1178  | 0.72  | 99.24 |
| scaffold02098 | 6684  | 8295  | 1612  | 14.25 | C_unshiu_00620 | 7861   | 6255   | 1607  | 0.99  | 98.7  |
| scaffold02098 | 10009 | 11313 | 1305  | 11.54 | C_unshiu_00620 | 4245   | 2941   | 1305  | 0.8   | 100   |
| scaffold02099 | 1541  | 8630  | 7090  | 62.76 | C_unshiu_03117 | 8609   | 1520   | 7090  | 82.36 | 100   |
| scaffold02101 | 2345  | 4998  | 2654  | 23.56 | C_unshiu_00220 | 159073 | 156411 | 2663  | 0.85  | 99.17 |
| scaffold02102 | 17    | 7938  | 7922  | 70.42 | C_unshiu_00351 | 137008 | 144929 | 7922  | 3.3   | 99.99 |
| scaffold02103 | 868   | 6406  | 5539  | 49.2  | C_unshiu_00471 | 181174 | 175636 | 5539  | 2.76  | 100   |
| scaffold02105 | 4152  | 5275  | 1124  | 9.99  | C_unshiu_00237 | 172561 | 173685 | 1125  | 0.37  | 99.73 |
| scaffold02107 | 5206  | 10715 | 5510  | 49.03 | C_unshiu_00635 | 74377  | 68868  | 5510  | 3.45  | 100   |
| scaffold02108 | 1     | 1038  | 1038  | 9.24  | C_unshiu_00020 | 513718 | 512681 | 1038  | 0.13  | 100   |
| scaffold02108 | 4124  | 10636 | 6513  | 57.96 | C_unshiu_00102 | 36591  | 43103  | 6513  | 1.43  | 100   |
| scaffold02109 | 6664  | 11237 | 4574  | 40.7  | C_unshiu_00714 | 48204  | 52771  | 4568  | 3.22  | 99.69 |
| scaffold02110 | 10063 | 11233 | 1171  | 10.42 | C_unshiu_00042 | 563066 | 561880 | 1187  | 0.19  | 98.23 |
| scaffold02111 | 1     | 3541  | 3541  | 31.57 | C_unshiu_01674 | 50146  | 46608  | 3539  | 6.57  | 99.72 |
| scaffold02111 | 3545  | 5517  | 1973  | 17.59 | C_unshiu_00326 | 13849  | 11877  | 1973  | 0.78  | 99.59 |
| scaffold02111 | 8610  | 11216 | 2607  | 23.24 | C_unshiu_00326 | 8704   | 6097   | 2608  | 1.03  | 99.77 |
| scaffold02115 | 825   | 1828  | 1004  | 8.99  | C_unshiu_00045 | 517334 | 518341 | 1008  | 0.16  | 98.81 |
| scaffold02116 | 1     | 6983  | 6983  | 62.45 | C_unshiu_03008 | 6947   | 1      | 6947  | 54.88 | 99.17 |
| scaffold02117 | 4170  | 5457  | 1288  | 11.54 | C_unshiu_00426 | 12871  | 11584  | 1288  | 0.59  | 99.77 |
| scaffold02117 | 7512  | 10062 | 2551  | 22.86 | C_unshiu_02932 | 13440  | 10905  | 2536  | 16.98 | 99.37 |
| scaffold02117 | 10070 | 11158 | 1089  | 9.76  | C_unshiu_00426 | 8801   | 7713   | 1089  | 0.5   | 100   |
| scaffold02119 | 10078 | 11145 | 1068  | 9.58  | C_unshiu_01717 | 50164  | 49097  | 1068  | 2.06  | 100   |
| scaffold02120 | 2659  | 4905  | 2247  | 20.18 | C_unshiu_00220 | 251780 | 254026 | 2247  | 0.71  | 99.87 |
| scaffold02121 | 2484  | 5034  | 2551  | 22.9  | C_unshiu_00107 | 23029  | 20468  | 2562  | 0.57  | 99.14 |
| scaffold02122 | 1     | 1558  | 1558  | 14.01 | C_unshiu_00614 | 111878 | 113433 | 1556  | 0.95  | 99.04 |
| scaffold02123 | 1     | 7997  | 7997  | 71.99 | C_unshiu_00640 | 114341 | 122345 | 8005  | 5.06  | 98.2  |
| scaffold02124 | 1     | 4321  | 4321  | 38.9  | C_unshiu_01098 | 41629  | 45949  | 4321  | 4.49  | 100   |
| scaffold02124 | 8535  | 10696 | 2162  | 19.46 | C_unshiu_01098 | 49665  | 51826  | 2162  | 2.25  | 100   |
| scaffold02125 | 1318  | 7723  | 6406  | 57.73 | C_unshiu_00502 | 144487 | 150921 | 6435  | 3.37  | 99.29 |
| scaffold02126 | 1     | 1725  | 1725  | 15.55 | C_unshiu_01708 | 5583   | 7307   | 1725  | 3.31  | 99.25 |
| scaffold02126 | 4638  | 7895  | 3258  | 29.37 | C_unshiu_01926 | 19961  | 16703  | 3259  | 7.43  | 98.9  |
| scaffold02126 | 8840  | 11093 | 2254  | 20.32 | C_unshiu_01708 | 13855  | 16125  | 2271  | 4.35  | 98.5  |
| scaffold02127 | 1     | 1246  | 1246  | 11.25 | C_unshiu_00273 | 215218 | 213975 | 1244  | 0.45  | 99.6  |
| scaffold02128 | 7544  | 10866 | 3323  | 30.01 | C_unshiu_00106 | 449120 | 445795 | 3326  | 0.74  | 98.23 |
| scaffold02129 | 2600  | 5040  | 2441  | 22.06 | C_unshiu_00688 | 144135 | 146575 | 2441  | 1.66  | 99.88 |
| scaffold02130 | 1     | 11059 | 11059 | 100   | C_unshiu_00702 | 41688  | 52812  | 11125 | 7.76  | 99.24 |
| scaffold02132 | 655   | 2479  | 1825  | 16.58 | C_unshiu_00538 | 138385 | 140207 | 1823  | 1     | 99.84 |
| scaffold02132 | 3409  | 11004 | 7596  | 69.03 | C_unshiu_00198 | 252285 | 259880 | 7596  | 2.26  | 100   |
| scaffold02133 | 1     | 2032  | 2032  | 18.48 | C_unshiu_00104 | 367993 | 370021 | 2029  | 0.45  | 98.87 |
| scaffold02133 | 3848  | 5629  | 1782  | 16.2  | C_unshiu_00104 | 372172 | 373956 | 1785  | 0.4   | 98.32 |
| scaffold02135 | 1     | 2124  | 2124  | 19.33 | C_unshiu_00727 | 60457  | 58329  | 2129  | 1.53  | 99.58 |
| scaffold02135 | 4948  | 10988 | 6041  | 54.98 | C_unshiu_00727 | 56261  | 50265  | 5997  | 4.31  | 98.22 |
| scaffold02136 | 1     | 1961  | 1961  | 17.84 | C_unshiu_01295 | 66485  | 64526  | 1960  | 2.52  | 98.52 |
| scaffold02136 | 1370  | 8143  | 6774  | 61.63 | C_unshiu_01295 | 64747  | 57976  | 6772  | 8.71  | 99.34 |
| scaffold02137 | 1     | 1317  | 1317  | 12    | C_unshiu_00423 | 63469  | 64788  | 1320  | 0.61  | 99.7  |
| scaffold02137 | 2677  | 6098  | 3422  | 31.18 | C_unshiu_00423 | 66469  | 69890  | 3422  | 1.57  | 100   |
| scaffold02138 | 5678  | 10959 | 5282  | 48.2  | C_unshiu_01990 | 1      | 5276   | 5276  | 12.9  | 99.7  |
| scaffold02139 | 4     | 7635  | 7632  | 69.64 | C_unshiu_00344 | 220194 | 227849 | 7656  | 3.09  | 99.27 |
| scaffold02140 | 374   | 4648  | 4275  | 39.03 | C_unshiu_01212 | 43563  | 39253  | 4311  | 5.12  | 99.12 |
| scaffold02141 | 3120  | 5080  | 1961  | 17.91 | C_unshiu_02705 | 1961   | 1      | 1961  | 9.92  | 99.03 |
| scaffold02142 | 1     | 10947 | 10947 | 100   | C_unshiu_00034 | 36670  | 47613  | 10944 | 1.56  | 99.93 |
| scaffold02144 | 1979  | 3494  | 1516  | 13.94 | C_unshiu_00849 | 96575  | 95062  | 1514  | 1.23  | 98.88 |

|               |      |       |       |       |                |        |        |       |       |       |
|---------------|------|-------|-------|-------|----------------|--------|--------|-------|-------|-------|
| scaffold02145 | 6627 | 8072  | 1446  | 13.26 | C_unshiu_01538 | 54714  | 56159  | 1446  | 2.36  | 100   |
| scaffold02145 | 8751 | 10390 | 1640  | 15.04 | C_unshiu_00275 | 13266  | 14905  | 1640  | 0.59  | 99.76 |
| scaffold02146 | 5934 | 8438  | 2505  | 22.99 | C_unshiu_00171 | 357437 | 359941 | 2505  | 0.68  | 99.92 |
| scaffold02149 | 1    | 7133  | 7133  | 65.6  | C_unshiu_00011 | 960377 | 953244 | 7134  | 0.74  | 99.99 |
| scaffold02149 | 9744 | 10874 | 1131  | 10.4  | C_unshiu_00011 | 947232 | 946101 | 1132  | 0.12  | 99.82 |
| scaffold02150 | 1351 | 3065  | 1715  | 15.79 | C_unshiu_00435 | 181410 | 183130 | 1721  | 0.81  | 99.3  |
| scaffold02152 | 1    | 2628  | 2628  | 24.2  | C_unshiu_01283 | 40899  | 38289  | 2611  | 3.32  | 98.21 |
| scaffold02153 | 1517 | 2576  | 1060  | 9.79  | C_unshiu_00484 | 2287   | 3351   | 1065  | 0.54  | 98.69 |
| scaffold02155 | 4103 | 9312  | 5210  | 48.19 | C_unshiu_00274 | 95334  | 100549 | 5216  | 1.87  | 98.93 |
| scaffold02157 | 8968 | 10777 | 1810  | 16.8  | C_unshiu_00092 | 184514 | 186328 | 1815  | 0.39  | 99.72 |
| scaffold02158 | 1    | 4267  | 4267  | 39.52 | C_unshiu_01093 | 62549  | 66815  | 4267  | 4.42  | 99.95 |
| scaffold02158 | 4288 | 5620  | 1333  | 12.35 | C_unshiu_01093 | 67224  | 68561  | 1338  | 1.39  | 99.1  |
| scaffold02159 | 8741 | 10497 | 1757  | 16.31 | C_unshiu_00042 | 406539 | 404782 | 1758  | 0.27  | 99.94 |
| scaffold02160 | 5298 | 7760  | 2463  | 22.83 | C_unshiu_01946 | 24146  | 26608  | 2463  | 5.74  | 100   |
| scaffold02161 | 3311 | 5387  | 2077  | 19.29 | C_unshiu_00766 | 33355  | 35431  | 2077  | 1.56  | 98.46 |
| scaffold02161 | 7061 | 8352  | 1292  | 12    | C_unshiu_00766 | 33342  | 34633  | 1292  | 0.97  | 100   |
| scaffold02161 | 9309 | 10768 | 1460  | 13.56 | C_unshiu_00766 | 35795  | 37255  | 1461  | 1.09  | 99.66 |
| scaffold02164 | 670  | 10749 | 10080 | 93.78 | C_unshiu_00123 | 55039  | 44965  | 10075 | 2.4   | 99.93 |
| scaffold02165 | 935  | 2467  | 1533  | 14.36 | C_unshiu_00135 | 106700 | 108260 | 1561  | 0.38  | 98.08 |
| scaffold02166 | 1139 | 5376  | 4238  | 39.54 | C_unshiu_00090 | 26089  | 21853  | 4237  | 0.9   | 99.91 |
| scaffold02166 | 7898 | 10717 | 2820  | 26.31 | C_unshiu_00630 | 72927  | 70095  | 2833  | 1.76  | 98.38 |
| scaffold02167 | 1    | 4868  | 4868  | 45.46 | C_unshiu_02211 | 20026  | 24895  | 4870  | 14.82 | 99.96 |
| scaffold02167 | 3675 | 10573 | 6899  | 64.43 | C_unshiu_00813 | 126852 | 119959 | 6894  | 5.42  | 99.29 |
| scaffold02168 | 1    | 1145  | 1145  | 10.74 | C_unshiu_01368 | 24344  | 25497  | 1154  | 1.58  | 98.87 |
| scaffold02169 | 1    | 1725  | 1725  | 16.13 | C_unshiu_02105 | 15454  | 13724  | 1731  | 4.77  | 99.02 |
| scaffold02169 | 2906 | 10152 | 7247  | 67.77 | C_unshiu_02105 | 12301  | 5057   | 7245  | 19.96 | 99.68 |
| scaffold02169 | 8504 | 10693 | 2190  | 20.48 | C_unshiu_00629 | 143453 | 145640 | 2188  | 1.36  | 98.49 |
| scaffold02170 | 1    | 9586  | 9586  | 89.7  | C_unshiu_00733 | 120598 | 111013 | 9586  | 6.92  | 100   |
| scaffold02170 | 9580 | 10687 | 1108  | 10.37 | C_unshiu_00733 | 109919 | 111024 | 1106  | 0.8   | 99.73 |
| scaffold02173 | 1    | 1895  | 1895  | 17.77 | C_unshiu_00272 | 77468  | 79365  | 1898  | 0.68  | 99    |
| scaffold02173 | 411  | 3285  | 2875  | 26.96 | C_unshiu_01830 | 35832  | 38697  | 2866  | 6.05  | 98.54 |
| scaffold02173 | 8290 | 10663 | 2374  | 22.26 | C_unshiu_00272 | 51600  | 53982  | 2383  | 0.85  | 98.95 |
| scaffold02174 | 2349 | 6176  | 3828  | 35.88 | C_unshiu_01212 | 64457  | 68279  | 3823  | 4.54  | 98.15 |
| scaffold02176 | 2570 | 4319  | 1750  | 16.42 | C_unshiu_00870 | 1773   | 3520   | 1748  | 1.45  | 99.03 |
| scaffold02177 | 1    | 1262  | 1262  | 11.84 | C_unshiu_01732 | 5699   | 6960   | 1262  | 2.45  | 100   |
| scaffold02177 | 3977 | 8089  | 4113  | 38.59 | C_unshiu_01732 | 10010  | 14113  | 4104  | 7.98  | 98.89 |
| scaffold02177 | 9356 | 10659 | 1304  | 12.23 | C_unshiu_01732 | 15941  | 17238  | 1298  | 2.52  | 99.54 |
| scaffold02179 | 1    | 1638  | 1638  | 15.38 | C_unshiu_00118 | 105386 | 103749 | 1638  | 0.38  | 100   |
| scaffold02180 | 1    | 10648 | 10648 | 100   | C_unshiu_00182 | 136076 | 146788 | 10713 | 3     | 99.01 |
| scaffold02182 | 6964 | 10638 | 3675  | 34.55 | C_unshiu_01978 | 24271  | 27945  | 3675  | 8.9   | 99.92 |
| scaffold02184 | 1    | 1843  | 1843  | 17.38 | C_unshiu_00488 | 83605  | 81759  | 1847  | 0.94  | 99.35 |
| scaffold02185 | 2989 | 3988  | 1000  | 9.45  | C_unshiu_01297 | 54604  | 53605  | 1000  | 1.29  | 99.8  |
| scaffold02185 | 2989 | 3988  | 1000  | 9.45  | C_unshiu_02361 | 18374  | 17371  | 1004  | 3.58  | 98.01 |
| scaffold02185 | 4872 | 10583 | 5712  | 53.97 | C_unshiu_02361 | 14114  | 8393   | 5722  | 20.39 | 99.6  |
| scaffold02186 | 1    | 1344  | 1344  | 12.71 | C_unshiu_00115 | 27699  | 26336  | 1364  | 0.32  | 98.02 |
| scaffold02186 | 3936 | 6366  | 2431  | 22.98 | C_unshiu_00158 | 322706 | 320276 | 2431  | 0.65  | 100   |
| scaffold02188 | 5375 | 10051 | 4677  | 44.26 | C_unshiu_01677 | 6726   | 11402  | 4677  | 8.71  | 100   |
| scaffold02189 | 3229 | 10567 | 7339  | 69.45 | C_unshiu_00034 | 672014 | 679364 | 7351  | 1.05  | 99.21 |
| scaffold02191 | 730  | 2546  | 1817  | 17.2  | C_unshiu_00144 | 245827 | 244011 | 1817  | 0.46  | 100   |
| scaffold02191 | 9470 | 10566 | 1097  | 10.38 | C_unshiu_00959 | 66753  | 67849  | 1097  | 0.99  | 99.91 |
| scaffold02193 | 1    | 8770  | 8770  | 83.11 | C_unshiu_01749 | 31947  | 23178  | 8770  | 17.33 | 100   |
| scaffold02193 | 8873 | 10251 | 1379  | 13.07 | C_unshiu_01749 | 23030  | 21654  | 1377  | 2.72  | 99.71 |
| scaffold02194 | 894  | 2491  | 1598  | 15.17 | C_unshiu_00203 | 66469  | 64872  | 1598  | 0.48  | 99.87 |
| scaffold02194 | 3215 | 5191  | 1977  | 18.76 | C_unshiu_00203 | 64653  | 62676  | 1978  | 0.59  | 99.19 |
| scaffold02194 | 7263 | 8327  | 1065  | 10.11 | C_unshiu_00203 | 60604  | 59540  | 1065  | 0.32  | 100   |
| scaffold02195 | 3405 | 4507  | 1103  | 10.47 | C_unshiu_00737 | 70318  | 69216  | 1103  | 0.8   | 98.1  |
| scaffold02196 | 1    | 1102  | 1102  | 10.46 | C_unshiu_00207 | 1102   | 1      | 1102  | 0.33  | 100   |
| scaffold02197 | 6653 | 8280  | 1628  | 15.46 | C_unshiu_01744 | 44850  | 43221  | 1630  | 3.21  | 99.69 |
| scaffold02197 | 9204 | 10528 | 1325  | 12.59 | C_unshiu_01744 | 41919  | 40594  | 1326  | 2.61  | 99.7  |
| scaffold02201 | 8931 | 10450 | 1520  | 14.55 | C_unshiu_00848 | 62296  | 63817  | 1522  | 1.24  | 99.74 |
| scaffold02202 | 1    | 1175  | 1175  | 11.2  | C_unshiu_00479 | 160773 | 159599 | 1175  | 0.59  | 99.32 |
| scaffold02204 | 1    | 2586  | 2586  | 24.67 | C_unshiu_00320 | 90189  | 87595  | 2595  | 1.01  | 99.42 |
| scaffold02204 | 3217 | 4337  | 1121  | 10.7  | C_unshiu_00320 | 87488  | 86365  | 1124  | 0.44  | 98.14 |
| scaffold02205 | 40   | 1864  | 1825  | 17.43 | C_unshiu_00838 | 82740  | 80917  | 1824  | 1.47  | 99.07 |
| scaffold02205 | 5496 | 6571  | 1076  | 10.28 | C_unshiu_00838 | 75562  | 74488  | 1075  | 0.87  | 99.26 |
| scaffold02206 | 1160 | 10468 | 9309  | 88.93 | C_unshiu_00197 | 169625 | 160316 | 9310  | 2.76  | 99.99 |
| scaffold02207 | 3451 | 10475 | 7025  | 67.06 | C_unshiu_00387 | 158128 | 151023 | 7106  | 3.14  | 98.1  |
| scaffold02208 | 3868 | 6478  | 2611  | 24.97 | C_unshiu_00724 | 108019 | 110629 | 2611  | 1.87  | 100   |
| scaffold02208 | 7514 | 8873  | 1360  | 13.01 | C_unshiu_00546 | 162704 | 161353 | 1352  | 0.75  | 98.75 |
| scaffold02209 | 1    | 10458 | 10458 | 100   | C_unshiu_00959 | 98790  | 88324  | 10467 | 9.45  | 99.48 |
| scaffold02210 | 626  | 1843  | 1218  | 11.7  | C_unshiu_02089 | 31765  | 32982  | 1218  | 3.29  | 100   |
| scaffold02210 | 3304 | 5491  | 2188  | 21.01 | C_unshiu_02089 | 34827  | 37004  | 2178  | 5.88  | 99    |
| scaffold02211 | 8968 | 10419 | 1452  | 13.94 | C_unshiu_00241 | 244499 | 243043 | 1457  | 0.48  | 98.83 |
| scaffold02212 | 1    | 1050  | 1050  | 10.07 | C_unshiu_02113 | 13556  | 14608  | 1053  | 2.91  | 99.43 |
| scaffold02212 | 5725 | 10424 | 4700  | 45.09 | C_unshiu_00712 | 125847 | 121151 | 4697  | 3.3   | 99.15 |
| scaffold02213 | 1    | 1565  | 1565  | 15.03 | C_unshiu_00382 | 196056 | 197620 | 1565  | 0.68  | 99.62 |
| scaffold02213 | 1703 | 7019  | 5317  | 51.07 | C_unshiu_00382 | 197877 | 203186 | 5310  | 2.32  | 98.39 |
| scaffold02213 | 9307 | 10411 | 1105  | 10.61 | C_unshiu_00382 | 205745 | 206849 | 1105  | 0.48  | 99.91 |
| scaffold02215 | 1    | 4099  | 4099  | 39.45 | C_unshiu_01017 | 25742  | 29858  | 4117  | 3.95  | 98.03 |

|               |      |       |       |       |                |        |        |       |       |       |
|---------------|------|-------|-------|-------|----------------|--------|--------|-------|-------|-------|
| scaffold02215 | 5085 | 10390 | 5306  | 51.07 | C_unshiu_03109 | 8983   | 3631   | 5353  | 59.59 | 98.49 |
| scaffold02216 | 1    | 1020  | 1020  | 9.82  | C_unshiu_00290 | 2813   | 1794   | 1020  | 0.38  | 100   |
| scaffold02218 | 6039 | 10367 | 4329  | 41.76 | C_unshiu_02271 | 24220  | 28548  | 4329  | 14.04 | 100   |
| scaffold02219 | 2485 | 4052  | 1568  | 15.13 | C_unshiu_01804 | 46197  | 47763  | 1567  | 3.24  | 99.68 |
| scaffold02222 | 2750 | 6830  | 4081  | 39.59 | C_unshiu_02145 | 21312  | 25374  | 4063  | 11.53 | 98.8  |
| scaffold02222 | 6852 | 8294  | 1443  | 14    | C_unshiu_00560 | 124610 | 126052 | 1443  | 0.82  | 99.79 |
| scaffold02223 | 7324 | 8874  | 1551  | 15.05 | C_unshiu_00517 | 147995 | 149545 | 1551  | 0.83  | 100   |
| scaffold02226 | 4927 | 6520  | 1594  | 15.49 | C_unshiu_00625 | 64281  | 65874  | 1594  | 0.98  | 100   |
| scaffold02228 | 2219 | 3574  | 1356  | 13.16 | C_unshiu_01047 | 61851  | 63206  | 1356  | 1.35  | 100   |
| scaffold02231 | 8940 | 10278 | 1339  | 13.03 | C_unshiu_00121 | 167336 | 168677 | 1342  | 0.32  | 99.03 |
| scaffold02232 | 1    | 9034  | 9034  | 87.87 | C_unshiu_00904 | 85677  | 94710  | 9034  | 7.75  | 100   |
| scaffold02233 | 1    | 7038  | 7038  | 68.49 | C_unshiu_00076 | 498477 | 491441 | 7037  | 1.38  | 99.99 |
| scaffold02235 | 1    | 1843  | 1843  | 17.97 | C_unshiu_02893 | 8887   | 7046   | 1842  | 11.55 | 99.84 |
| scaffold02236 | 861  | 1959  | 1099  | 10.72 | C_unshiu_00279 | 100724 | 101826 | 1103  | 0.4   | 98.73 |
| scaffold02236 | 2409 | 3531  | 1123  | 10.96 | C_unshiu_00925 | 99485  | 100607 | 1123  | 0.98  | 100   |
| scaffold02236 | 4801 | 6431  | 1631  | 15.92 | C_unshiu_00279 | 123085 | 121462 | 1624  | 0.59  | 99.51 |
| scaffold02236 | 8945 | 10248 | 1304  | 12.72 | C_unshiu_00279 | 104501 | 105808 | 1308  | 0.47  | 99.16 |
| scaffold02237 | 653  | 3156  | 2504  | 24.53 | C_unshiu_00025 | 57573  | 60079  | 2507  | 0.33  | 98.85 |
| scaffold02242 | 1    | 1697  | 1697  | 16.71 | C_unshiu_01025 | 94312  | 96012  | 1701  | 1.65  | 99.06 |
| scaffold02245 | 6343 | 9869  | 3527  | 34.84 | C_unshiu_02010 | 5853   | 9418   | 3566  | 8.84  | 98.15 |
| scaffold02246 | 1    | 4911  | 4911  | 48.36 | C_unshiu_00913 | 46781  | 41870  | 4912  | 4.25  | 99.72 |
| scaffold02248 | 6172 | 7675  | 1504  | 14.82 | C_unshiu_00395 | 76054  | 77547  | 1494  | 0.67  | 98.14 |
| scaffold02249 | 303  | 3313  | 3011  | 29.64 | C_unshiu_00244 | 10060  | 13083  | 3024  | 1.01  | 98.45 |
| scaffold02249 | 2778 | 3887  | 1110  | 10.93 | C_unshiu_01081 | 30734  | 29612  | 1123  | 1.15  | 98.49 |
| scaffold02251 | 5987 | 10139 | 4153  | 40.96 | C_unshiu_00606 | 154476 | 158632 | 4157  | 2.51  | 99.3  |
| scaffold02252 | 3840 | 6561  | 2722  | 26.86 | C_unshiu_00393 | 89088  | 86367  | 2722  | 1.21  | 100   |
| scaffold02253 | 38   | 8000  | 7963  | 78.69 | C_unshiu_00120 | 321145 | 329067 | 7923  | 1.88  | 98.87 |
| scaffold02254 | 1060 | 2782  | 1723  | 17.02 | C_unshiu_01689 | 5727   | 7456   | 1730  | 3.26  | 99.36 |
| scaffold02255 | 1    | 1944  | 1944  | 19.21 | C_unshiu_02955 | 2739   | 4684   | 1946  | 13.65 | 99.9  |
| scaffold02255 | 3763 | 4788  | 1026  | 10.14 | C_unshiu_02955 | 6000   | 7025   | 1026  | 7.2   | 100   |
| scaffold02255 | 4816 | 10120 | 5305  | 52.42 | C_unshiu_02955 | 6914   | 12211  | 5298  | 37.17 | 99.62 |
| scaffold02256 | 1    | 2331  | 2331  | 23.04 | C_unshiu_00393 | 173295 | 175625 | 2331  | 1.04  | 99.57 |
| scaffold02256 | 5899 | 6916  | 1018  | 10.06 | C_unshiu_00393 | 193860 | 194877 | 1018  | 0.45  | 100   |
| scaffold02257 | 1    | 5399  | 5399  | 53.38 | C_unshiu_00098 | 296084 | 290666 | 5419  | 1.18  | 99.46 |
| scaffold02257 | 5401 | 8440  | 3040  | 30.06 | C_unshiu_00673 | 103190 | 100151 | 3040  | 2.02  | 100   |
| scaffold02259 | 5894 | 8317  | 2424  | 24.05 | C_unshiu_01706 | 41429  | 43846  | 2418  | 4.63  | 98.77 |
| scaffold02261 | 2    | 1329  | 1328  | 13.2  | C_unshiu_00149 | 9401   | 10727  | 1327  | 0.34  | 99.17 |
| scaffold02262 | 2330 | 5065  | 2736  | 27.18 | C_unshiu_00356 | 36179  | 33427  | 2753  | 1.16  | 98.73 |
| scaffold02263 | 1    | 10068 | 10068 | 100   | C_unshiu_00040 | 398518 | 408582 | 10065 | 1.53  | 99.95 |
| scaffold02264 | 5233 | 6789  | 1557  | 15.47 | C_unshiu_01277 | 66882  | 68438  | 1557  | 1.97  | 100   |
| scaffold02264 | 8191 | 9402  | 1212  | 12.04 | C_unshiu_01277 | 70081  | 71292  | 1212  | 1.53  | 100   |
| scaffold02269 | 6    | 2446  | 2441  | 24.32 | C_unshiu_00013 | 677898 | 680334 | 2437  | 0.26  | 99.39 |
| scaffold02270 | 4987 | 6413  | 1427  | 14.22 | C_unshiu_00011 | 16661  | 15235  | 1427  | 0.15  | 100   |
| scaffold02271 | 99   | 2020  | 1922  | 19.27 | C_unshiu_01521 | 35719  | 37646  | 1928  | 3.1   | 99.48 |
| scaffold02271 | 5353 | 7611  | 2259  | 22.53 | C_unshiu_00595 | 141547 | 139288 | 2260  | 1.34  | 99.2  |
| scaffold02271 | 7931 | 10026 | 2096  | 20.91 | C_unshiu_01521 | 44612  | 46716  | 2105  | 3.38  | 98.43 |
| scaffold02273 | 8963 | 10020 | 1058  | 10.56 | C_unshiu_00330 | 158673 | 159726 | 1054  | 0.42  | 98.11 |
| scaffold02276 | 1    | 2569  | 2569  | 25.73 | C_unshiu_00137 | 216992 | 214423 | 2570  | 0.64  | 99.3  |
| scaffold02276 | 4169 | 6727  | 2559  | 25.63 | C_unshiu_00137 | 213164 | 210603 | 2562  | 0.63  | 99.3  |
| scaffold02277 | 1    | 1664  | 1664  | 16.75 | C_unshiu_02272 | 11693  | 10030  | 1664  | 5.41  | 100   |
| scaffold02277 | 7261 | 9933  | 2673  | 26.91 | C_unshiu_00717 | 100582 | 97917  | 2666  | 1.88  | 99.03 |
| scaffold02278 | 3827 | 7501  | 3675  | 36.88 | C_unshiu_00083 | 113357 | 117031 | 3675  | 0.78  | 100   |
| scaffold02280 | 5784 | 7422  | 1639  | 16.49 | C_unshiu_00344 | 138370 | 136732 | 1639  | 0.66  | 98.96 |
| scaffold02282 | 6623 | 8382  | 1760  | 17.74 | C_unshiu_00064 | 522775 | 524533 | 1759  | 0.31  | 99.72 |
| scaffold02284 | 7444 | 8609  | 1166  | 11.79 | C_unshiu_00568 | 126005 | 127170 | 1166  | 0.67  | 99.23 |
| scaffold02285 | 4338 | 6939  | 2602  | 26.32 | C_unshiu_00586 | 144890 | 147491 | 2602  | 1.53  | 100   |
| scaffold02285 | 6933 | 8526  | 1594  | 16.12 | C_unshiu_00849 | 8029   | 6437   | 1593  | 1.3   | 98.87 |
| scaffold02287 | 2269 | 5200  | 2932  | 29.73 | C_unshiu_01518 | 4654   | 1707   | 2948  | 4.73  | 99.25 |
| scaffold02287 | 5404 | 6863  | 1460  | 14.8  | C_unshiu_01518 | 1460   | 1      | 1460  | 2.34  | 99.79 |
| scaffold02288 | 1    | 3681  | 3681  | 37.34 | C_unshiu_00329 | 168441 | 172157 | 3717  | 1.47  | 98.41 |
| scaffold02289 | 1    | 1478  | 1478  | 15    | C_unshiu_02769 | 9429   | 10906  | 1478  | 7.95  | 99.46 |
| scaffold02289 | 2302 | 4933  | 2632  | 26.7  | C_unshiu_02769 | 11842  | 14473  | 2632  | 14.15 | 99.96 |
| scaffold02289 | 5532 | 6824  | 1293  | 13.12 | C_unshiu_02769 | 15014  | 16306  | 1293  | 6.95  | 99.46 |
| scaffold02290 | 2    | 1860  | 1859  | 18.88 | C_unshiu_01253 | 76595  | 74737  | 1859  | 2.3   | 99.89 |
| scaffold02290 | 2640 | 5008  | 2369  | 24.05 | C_unshiu_01253 | 73741  | 71373  | 2369  | 2.94  | 99.75 |
| scaffold02290 | 5542 | 7156  | 1615  | 16.4  | C_unshiu_01253 | 71069  | 69455  | 1615  | 2     | 100   |
| scaffold02290 | 8029 | 9849  | 1821  | 18.49 | C_unshiu_01253 | 68244  | 66424  | 1821  | 2.26  | 100   |
| scaffold02291 | 2734 | 9829  | 7096  | 72.19 | C_unshiu_02663 | 12342  | 19371  | 7030  | 34.1  | 98.41 |
| scaffold02292 | 977  | 2589  | 1613  | 16.4  | C_unshiu_01111 | 45533  | 43921  | 1613  | 1.7   | 98.82 |
| scaffold02292 | 4649 | 7935  | 3287  | 33.42 | C_unshiu_01111 | 41668  | 38384  | 3285  | 3.47  | 99.82 |
| scaffold02292 | 8740 | 9835  | 1096  | 11.14 | C_unshiu_01111 | 37491  | 36396  | 1096  | 1.16  | 100   |
| scaffold02293 | 398  | 1462  | 1065  | 10.83 | C_unshiu_00165 | 69813  | 68755  | 1059  | 0.29  | 98.41 |
| scaffold02293 | 8251 | 9835  | 1585  | 16.12 | C_unshiu_00094 | 451918 | 453502 | 1585  | 0.34  | 100   |
| scaffold02296 | 8712 | 9820  | 1109  | 11.29 | C_unshiu_00414 | 167424 | 168536 | 1113  | 0.5   | 98.57 |
| scaffold02297 | 1    | 1005  | 1005  | 10.23 | C_unshiu_00475 | 148915 | 149918 | 1004  | 0.5   | 99.2  |
| scaffold02297 | 2461 | 4799  | 2339  | 23.82 | C_unshiu_00475 | 154735 | 157073 | 2339  | 1.17  | 99.96 |
| scaffold02297 | 4914 | 8014  | 3101  | 31.58 | C_unshiu_00475 | 157343 | 160416 | 3074  | 1.53  | 98.81 |
| scaffold02297 | 6821 | 9821  | 3001  | 30.56 | C_unshiu_00475 | 150509 | 153508 | 3000  | 1.5   | 99.07 |
| scaffold02298 | 7339 | 9408  | 2070  | 21.09 | C_unshiu_00025 | 330587 | 328519 | 2069  | 0.27  | 99.71 |

|               |      |      |      |       |                |        |        |      |       |       |
|---------------|------|------|------|-------|----------------|--------|--------|------|-------|-------|
| scaffold02299 | 5809 | 7028 | 1220 | 12.46 | C_unshiu_00596 | 72433  | 73649  | 1217 | 0.72  | 98.69 |
| scaffold02300 | 1    | 1042 | 1042 | 10.64 | C_unshiu_00294 | 266582 | 265540 | 1043 | 0.39  | 99.9  |
| scaffold02300 | 3001 | 5665 | 2665 | 27.21 | C_unshiu_00294 | 262608 | 259924 | 2685 | 1     | 98.47 |
| scaffold02300 | 5854 | 7983 | 2130 | 21.75 | C_unshiu_00294 | 257956 | 255827 | 2130 | 0.79  | 100   |
| scaffold02300 | 8727 | 9794 | 1068 | 10.9  | C_unshiu_00294 | 259794 | 258727 | 1068 | 0.4   | 100   |
| scaffold02301 | 8091 | 9793 | 1703 | 17.39 | C_unshiu_00696 | 126854 | 128556 | 1703 | 1.18  | 100   |
| scaffold02303 | 883  | 9775 | 8893 | 90.98 | C_unshiu_01112 | 52687  | 43787  | 8901 | 9.4   | 99.58 |
| scaffold02306 | 7200 | 8836 | 1637 | 16.78 | C_unshiu_00066 | 228488 | 226845 | 1644 | 0.3   | 98.6  |
| scaffold02307 | 1    | 1236 | 1236 | 12.67 | C_unshiu_00625 | 158281 | 157049 | 1233 | 0.76  | 99.19 |
| scaffold02308 | 4770 | 6071 | 1302 | 13.38 | C_unshiu_00040 | 526463 | 527766 | 1304 | 0.2   | 99.31 |
| scaffold02311 | 752  | 1965 | 1214 | 12.49 | C_unshiu_02466 | 8040   | 9253   | 1214 | 4.74  | 100   |
| scaffold02314 | 1    | 6334 | 6334 | 65.24 | C_unshiu_00018 | 399332 | 405660 | 6329 | 0.74  | 98.8  |
| scaffold02314 | 6335 | 8184 | 1850 | 19.05 | C_unshiu_00790 | 25774  | 23925  | 1850 | 1.42  | 100   |
| scaffold02315 | 1    | 3122 | 3122 | 32.23 | C_unshiu_01066 | 93077  | 96189  | 3113 | 3.15  | 98.62 |
| scaffold02317 | 1938 | 3918 | 1981 | 20.47 | C_unshiu_00084 | 341947 | 339974 | 1974 | 0.42  | 99.6  |
| scaffold02317 | 8124 | 9676 | 1553 | 16.05 | C_unshiu_00084 | 335129 | 333579 | 1551 | 0.33  | 99.87 |
| scaffold02319 | 6096 | 8686 | 2591 | 26.79 | C_unshiu_00892 | 49775  | 52365  | 2591 | 2.2   | 100   |
| scaffold02320 | 1    | 1979 | 1979 | 20.53 | C_unshiu_02840 | 334    | 2315   | 1982 | 11.77 | 99.45 |
| scaffold02320 | 5081 | 7052 | 1972 | 20.46 | C_unshiu_01480 | 51824  | 53790  | 1967 | 3.05  | 98.13 |
| scaffold02321 | 42   | 1653 | 1612 | 16.74 | C_unshiu_02568 | 13435  | 15031  | 1597 | 6.98  | 98.82 |
| scaffold02321 | 5973 | 8483 | 2511 | 26.08 | C_unshiu_02568 | 20093  | 22619  | 2527 | 11.04 | 98.62 |
| scaffold02323 | 734  | 5560 | 4827 | 50.19 | C_unshiu_01061 | 46203  | 51042  | 4840 | 4.89  | 98.39 |
| scaffold02324 | 1    | 3102 | 3102 | 32.32 | C_unshiu_00010 | 665935 | 662845 | 3091 | 0.31  | 99.58 |
| scaffold02325 | 4251 | 8076 | 3826 | 39.99 | C_unshiu_00173 | 37995  | 41822  | 3828 | 1.05  | 99.95 |
| scaffold02325 | 8164 | 9567 | 1404 | 14.68 | C_unshiu_00173 | 41911  | 43315  | 1405 | 0.39  | 98.43 |
| scaffold02327 | 1    | 2448 | 2448 | 25.61 | C_unshiu_00441 | 12661  | 15109  | 2449 | 1.16  | 99.92 |
| scaffold02327 | 6718 | 9332 | 2615 | 27.36 | C_unshiu_00441 | 18471  | 21090  | 2620 | 1.24  | 99.28 |
| scaffold02328 | 129  | 9564 | 9436 | 98.66 | C_unshiu_02237 | 1      | 9438   | 9438 | 29.43 | 99.98 |
| scaffold02329 | 1645 | 3499 | 1855 | 19.4  | C_unshiu_01975 | 8337   | 6485   | 1853 | 4.46  | 99.73 |
| scaffold02329 | 7896 | 9563 | 1668 | 17.44 | C_unshiu_01060 | 27927  | 26261  | 1667 | 1.68  | 98.38 |
| scaffold02330 | 1    | 2890 | 2890 | 30.23 | C_unshiu_01711 | 47149  | 44260  | 2890 | 5.55  | 100   |
| scaffold02330 | 6190 | 7743 | 1554 | 16.26 | C_unshiu_00916 | 80335  | 81888  | 1554 | 1.35  | 100   |
| scaffold02333 | 3212 | 6765 | 3554 | 37.25 | C_unshiu_00358 | 122880 | 119327 | 3554 | 1.5   | 100   |
| scaffold02335 | 1    | 2489 | 2489 | 26.11 | C_unshiu_00045 | 284054 | 286542 | 2489 | 0.39  | 99.2  |
| scaffold02335 | 6909 | 8682 | 1774 | 18.61 | C_unshiu_01578 | 4719   | 2946   | 1774 | 3.02  | 99.89 |
| scaffold02337 | 1    | 4387 | 4387 | 46.18 | C_unshiu_01042 | 79105  | 74697  | 4409 | 4.35  | 99.5  |
| scaffold02338 | 1    | 3302 | 3302 | 34.7  | C_unshiu_01755 | 18462  | 15160  | 3303 | 6.58  | 98.67 |
| scaffold02338 | 1309 | 4095 | 2787 | 29.29 | C_unshiu_00331 | 120658 | 117847 | 2812 | 1.12  | 98.44 |
| scaffold02339 | 1    | 1146 | 1146 | 12.04 | C_unshiu_00158 | 360437 | 361583 | 1147 | 0.31  | 98.52 |
| scaffold02339 | 3008 | 4675 | 1668 | 17.53 | C_unshiu_00158 | 363918 | 365588 | 1671 | 0.45  | 99.4  |
| scaffold02341 | 7189 | 9516 | 2328 | 24.46 | C_unshiu_00682 | 100050 | 102377 | 2328 | 1.57  | 100   |
| scaffold02342 | 1    | 2594 | 2594 | 27.28 | C_unshiu_01209 | 45666  | 48278  | 2613 | 3.09  | 98.81 |
| scaffold02342 | 7701 | 8994 | 1294 | 13.61 | C_unshiu_01209 | 53726  | 55019  | 1294 | 1.53  | 99.15 |
| scaffold02343 | 7711 | 9503 | 1793 | 18.87 | C_unshiu_00316 | 42672  | 40867  | 1806 | 0.7   | 98.28 |
| scaffold02345 | 8401 | 9473 | 1073 | 11.33 | C_unshiu_00216 | 142831 | 141761 | 1071 | 0.33  | 99.07 |
| scaffold02347 | 710  | 1919 | 1210 | 12.79 | C_unshiu_00711 | 27007  | 25793  | 1215 | 0.85  | 98.52 |
| scaffold02347 | 1951 | 3444 | 1494 | 15.79 | C_unshiu_01050 | 83131  | 81638  | 1494 | 1.49  | 100   |
| scaffold02347 | 7384 | 9462 | 2079 | 21.97 | C_unshiu_00711 | 21190  | 19110  | 2081 | 1.46  | 99.57 |
| scaffold02351 | 1    | 5060 | 5060 | 53.64 | C_unshiu_02388 | 5520   | 10579  | 5060 | 18.39 | 99.96 |
| scaffold02351 | 4337 | 9434 | 5098 | 54.04 | C_unshiu_02388 | 117    | 5228   | 5112 | 18.58 | 98.49 |
| scaffold02353 | 1343 | 8606 | 7264 | 77.31 | C_unshiu_00364 | 160548 | 167855 | 7308 | 3.12  | 98.18 |
| scaffold02354 | 2223 | 4947 | 2725 | 29.04 | C_unshiu_01252 | 23367  | 20649  | 2719 | 3.37  | 98.03 |
| scaffold02357 | 1    | 4028 | 4028 | 42.91 | C_unshiu_00802 | 20494  | 24507  | 4014 | 3.14  | 98.88 |
| scaffold02357 | 4318 | 7084 | 2767 | 29.47 | C_unshiu_00802 | 25104  | 27869  | 2766 | 2.16  | 99.67 |
| scaffold02359 | 1    | 1320 | 1320 | 14.06 | C_unshiu_02179 | 10565  | 9246   | 1320 | 3.88  | 100   |
| scaffold02359 | 2194 | 6368 | 4175 | 44.48 | C_unshiu_02179 | 8664   | 4487   | 4178 | 12.28 | 98.5  |
| scaffold02360 | 1    | 1073 | 1073 | 11.47 | C_unshiu_00395 | 200152 | 199074 | 1079 | 0.48  | 98.89 |
| scaffold02361 | 1361 | 2530 | 1170 | 12.52 | C_unshiu_02544 | 7959   | 9128   | 1170 | 4.99  | 100   |
| scaffold02361 | 2525 | 6566 | 4042 | 43.26 | C_unshiu_01094 | 91751  | 87709  | 4043 | 4.19  | 99.83 |
| scaffold02361 | 7564 | 9343 | 1780 | 19.05 | C_unshiu_00733 | 6502   | 8281   | 1780 | 1.29  | 98.43 |
| scaffold02362 | 124  | 4935 | 4812 | 51.55 | C_unshiu_01065 | 59868  | 64681  | 4814 | 4.86  | 98.8  |
| scaffold02362 | 6284 | 7515 | 1232 | 13.2  | C_unshiu_02950 | 4651   | 3420   | 1232 | 8.48  | 99.68 |
| scaffold02362 | 7520 | 9335 | 1816 | 19.45 | C_unshiu_01065 | 67035  | 68824  | 1790 | 1.81  | 98.18 |
| scaffold02363 | 4036 | 6119 | 2084 | 22.32 | C_unshiu_00271 | 110707 | 112779 | 2073 | 0.74  | 99.14 |
| scaffold02363 | 6135 | 8543 | 2409 | 25.8  | C_unshiu_00271 | 112896 | 115309 | 2414 | 0.86  | 98.96 |
| scaffold02364 | 3586 | 5228 | 1643 | 17.66 | C_unshiu_00669 | 73393  | 75036  | 1644 | 1.08  | 99.09 |
| scaffold02366 | 7073 | 9066 | 1994 | 21.42 | C_unshiu_00217 | 113088 | 115084 | 1997 | 0.62  | 99.4  |
| scaffold02369 | 1    | 1565 | 1565 | 16.87 | C_unshiu_00815 | 108987 | 107423 | 1565 | 1.23  | 100   |
| scaffold02369 | 1566 | 3068 | 1503 | 16.2  | C_unshiu_00497 | 177133 | 175631 | 1503 | 0.78  | 100   |
| scaffold02370 | 6288 | 7991 | 1704 | 18.38 | C_unshiu_01699 | 50247  | 48548  | 1700 | 3.23  | 99    |
| scaffold02373 | 1    | 1422 | 1422 | 15.32 | C_unshiu_00011 | 606810 | 608231 | 1422 | 0.15  | 100   |
| scaffold02373 | 1908 | 3528 | 1621 | 17.47 | C_unshiu_00011 | 608186 | 609806 | 1621 | 0.17  | 99.88 |
| scaffold02373 | 7772 | 9279 | 1508 | 16.25 | C_unshiu_00011 | 609887 | 611395 | 1509 | 0.16  | 99.27 |
| scaffold02375 | 478  | 1566 | 1089 | 11.73 | C_unshiu_00084 | 21548  | 20457  | 1092 | 0.23  | 99.08 |
| scaffold02375 | 2964 | 4373 | 1410 | 15.19 | C_unshiu_00084 | 19034  | 17624  | 1411 | 0.3   | 99.43 |
| scaffold02375 | 5387 | 8124 | 2738 | 29.5  | C_unshiu_00084 | 16528  | 13792  | 2737 | 0.58  | 98.91 |
| scaffold02375 | 6671 | 9279 | 2609 | 28.11 | C_unshiu_01795 | 41469  | 38880  | 2590 | 5.33  | 98.58 |
| scaffold02376 | 6048 | 9276 | 3229 | 34.81 | C_unshiu_00537 | 155049 | 151828 | 3222 | 1.77  | 98.06 |
| scaffold02377 | 1    | 3796 | 3796 | 41.02 | C_unshiu_00817 | 22089  | 25882  | 3794 | 2.99  | 98.92 |

|               |      |      |      |       |                |         |         |      |       |       |
|---------------|------|------|------|-------|----------------|---------|---------|------|-------|-------|
| scaffold02377 | 8207 | 9253 | 1047 | 11.32 | C_unshiu_00817 | 46717   | 47763   | 1047 | 0.83  | 100   |
| scaffold02379 | 230  | 1295 | 1066 | 11.54 | C_unshiu_01204 | 56888   | 55825   | 1064 | 1.25  | 98.69 |
| scaffold02379 | 1592 | 9234 | 7643 | 82.77 | C_unshiu_01204 | 54976   | 47347   | 7630 | 8.94  | 99.36 |
| scaffold02380 | 1    | 1348 | 1348 | 14.6  | C_unshiu_01723 | 30418   | 31765   | 1348 | 2.6   | 98.66 |
| scaffold02380 | 261  | 1565 | 1305 | 14.14 | C_unshiu_00452 | 156953  | 158257  | 1305 | 0.63  | 99.85 |
| scaffold02380 | 6041 | 9231 | 3191 | 34.57 | C_unshiu_00452 | 164500  | 167689  | 3190 | 1.54  | 99.31 |
| scaffold02381 | 1616 | 6483 | 4868 | 52.78 | C_unshiu_02809 | 11601   | 16449   | 4849 | 27.43 | 98.69 |
| scaffold02382 | 1    | 2205 | 2205 | 23.92 | C_unshiu_00814 | 117225  | 115020  | 2206 | 1.74  | 98.73 |
| scaffold02383 | 6407 | 8345 | 1939 | 21.04 | C_unshiu_00417 | 52942   | 54880   | 1939 | 0.88  | 100   |
| scaffold02385 | 1374 | 3146 | 1773 | 19.28 | C_unshiu_00148 | 143578  | 141816  | 1763 | 0.46  | 98.2  |
| scaffold02385 | 4785 | 6444 | 1660 | 18.05 | C_unshiu_00210 | 289430  | 287770  | 1661 | 0.51  | 98.08 |
| scaffold02387 | 1    | 1250 | 1250 | 13.64 | C_unshiu_00575 | 39586   | 38332   | 1255 | 0.73  | 98.89 |
| scaffold02387 | 1062 | 2384 | 1323 | 14.43 | C_unshiu_00575 | 38331   | 37009   | 1323 | 0.77  | 99.55 |
| scaffold02388 | 5316 | 8646 | 3331 | 36.3  | C_unshiu_02656 | 19578   | 16248   | 3331 | 16.06 | 100   |
| scaffold02389 | 1    | 2043 | 2043 | 22.26 | C_unshiu_01654 | 27356   | 25314   | 2043 | 3.71  | 100   |
| scaffold02389 | 2940 | 5466 | 2527 | 27.54 | C_unshiu_00123 | 376082  | 373556  | 2527 | 0.6   | 99.6  |
| scaffold02389 | 8068 | 9113 | 1046 | 11.4  | C_unshiu_00123 | 369051  | 368001  | 1051 | 0.25  | 98.95 |
| scaffold02390 | 1    | 2253 | 2253 | 24.56 | C_unshiu_01302 | 51231   | 48959   | 2273 | 2.94  | 98.16 |
| scaffold02390 | 6765 | 9174 | 2410 | 26.27 | C_unshiu_01302 | 48915   | 46506   | 2410 | 3.12  | 99.5  |
| scaffold02392 | 1    | 2535 | 2535 | 27.67 | C_unshiu_00736 | 71242   | 73783   | 2542 | 1.84  | 98.7  |
| scaffold02392 | 4985 | 7383 | 2399 | 26.18 | C_unshiu_00736 | 76929   | 79355   | 2427 | 1.76  | 98.19 |
| scaffold02392 | 8125 | 9162 | 1038 | 11.33 | C_unshiu_00736 | 79967   | 81005   | 1039 | 0.75  | 99.42 |
| scaffold02394 | 1237 | 3547 | 2311 | 25.27 | C_unshiu_00930 | 92352   | 90047   | 2306 | 2.03  | 99.31 |
| scaffold02394 | 3548 | 8054 | 4507 | 49.28 | C_unshiu_01593 | 32779   | 28273   | 4507 | 7.8   | 100   |
| scaffold02395 | 4242 | 6926 | 2685 | 29.36 | C_unshiu_01469 | 5634    | 8318    | 2685 | 4.1   | 98.88 |
| scaffold02399 | 7242 | 9130 | 1889 | 20.69 | C_unshiu_00662 | 115301  | 113407  | 1895 | 1.24  | 99.42 |
| scaffold02400 | 2657 | 4493 | 1837 | 20.08 | C_unshiu_00286 | 243779  | 241941  | 1839 | 0.67  | 99.08 |
| scaffold02400 | 7402 | 8422 | 1021 | 11.16 | C_unshiu_00286 | 240344  | 239324  | 1021 | 0.37  | 100   |
| scaffold02401 | 7883 | 9129 | 1247 | 13.66 | C_unshiu_00289 | 80676   | 81920   | 1245 | 0.46  | 98.08 |
| scaffold02404 | 7450 | 9134 | 1685 | 18.45 | C_unshiu_01429 | 67717   | 66035   | 1683 | 2.46  | 99.47 |
| scaffold02405 | 3692 | 4906 | 1215 | 13.3  | C_unshiu_00601 | 6904    | 5698    | 1207 | 0.72  | 98.52 |
| scaffold02407 | 859  | 3397 | 2539 | 27.8  | C_unshiu_00042 | 300996  | 303553  | 2558 | 0.4   | 98.44 |
| scaffold02407 | 7048 | 8353 | 1306 | 14.3  | C_unshiu_00042 | 304857  | 303552  | 1306 | 0.2   | 98.25 |
| scaffold02408 | 871  | 2077 | 1207 | 13.26 | C_unshiu_00251 | 209280  | 210486  | 1207 | 0.41  | 100   |
| scaffold02410 | 1    | 9087 | 9087 | 100   | C_unshiu_00844 | 22433   | 13321   | 9113 | 7.4   | 98.85 |
| scaffold02412 | 1    | 1374 | 1374 | 15.13 | C_unshiu_01551 | 4220    | 2847    | 1374 | 2.27  | 100   |
| scaffold02413 | 1989 | 6389 | 4401 | 48.44 | C_unshiu_00065 | 164799  | 160398  | 4402 | 0.8   | 99.98 |
| scaffold02413 | 7643 | 8795 | 1153 | 12.69 | C_unshiu_00065 | 158644  | 157483  | 1162 | 0.21  | 98.54 |
| scaffold02414 | 1    | 1175 | 1175 | 12.95 | C_unshiu_00453 | 147980  | 149154  | 1175 | 0.57  | 99.66 |
| scaffold02414 | 3683 | 4847 | 1165 | 12.84 | C_unshiu_00453 | 151484  | 152648  | 1165 | 0.56  | 99.91 |
| scaffold02415 | 1046 | 8491 | 7446 | 82.18 | C_unshiu_00685 | 139695  | 147140  | 7446 | 5.04  | 100   |
| scaffold02417 | 1    | 2109 | 2109 | 23.31 | C_unshiu_02316 | 6283    | 8391    | 2109 | 7.17  | 99.48 |
| scaffold02417 | 2224 | 3847 | 1624 | 17.95 | C_unshiu_02316 | 8544    | 10165   | 1622 | 5.52  | 99.88 |
| scaffold02421 | 1    | 9029 | 9029 | 100   | C_unshiu_01232 | 14178   | 23261   | 9084 | 11.05 | 98.75 |
| scaffold02423 | 1    | 1125 | 1125 | 12.46 | C_unshiu_01737 | 35333   | 34209   | 1125 | 2.2   | 99.64 |
| scaffold02426 | 1    | 1919 | 1919 | 21.27 | C_unshiu_01778 | 33825   | 35747   | 1923 | 3.9   | 99.17 |
| scaffold02426 | 4448 | 6456 | 2009 | 22.27 | C_unshiu_01778 | 38531   | 40539   | 2009 | 4.07  | 99.95 |
| scaffold02431 | 7784 | 9009 | 1226 | 13.61 | C_unshiu_00909 | 58757   | 59982   | 1226 | 1.06  | 98.78 |
| scaffold02432 | 1    | 1243 | 1243 | 13.79 | C_unshiu_01567 | 7409    | 6167    | 1243 | 2.1   | 100   |
| scaffold02432 | 1316 | 4133 | 2818 | 31.27 | C_unshiu_00005 | 1063559 | 1066376 | 2818 | 0.25  | 100   |
| scaffold02432 | 4128 | 5603 | 1476 | 16.38 | C_unshiu_02596 | 12887   | 11413   | 1475 | 6.64  | 99.53 |
| scaffold02432 | 6250 | 9013 | 2764 | 30.67 | C_unshiu_02596 | 10385   | 7616    | 2770 | 12.46 | 98.48 |
| scaffold02433 | 7801 | 9001 | 1201 | 13.34 | C_unshiu_00069 | 514850  | 516050  | 1201 | 0.23  | 100   |
| scaffold02434 | 1484 | 3028 | 1545 | 17.17 | C_unshiu_02976 | 7795    | 6253    | 1543 | 11.34 | 99.29 |
| scaffold02434 | 4652 | 7348 | 2697 | 29.97 | C_unshiu_02976 | 5586    | 2889    | 2698 | 19.84 | 99.52 |
| scaffold02435 | 5377 | 7122 | 1746 | 19.43 | C_unshiu_01437 | 48489   | 50234   | 1746 | 2.57  | 100   |
| scaffold02437 | 4915 | 8977 | 4063 | 45.26 | C_unshiu_01222 | 71578   | 75663   | 4086 | 4.9   | 98.85 |
| scaffold02438 | 4709 | 5984 | 1276 | 14.24 | C_unshiu_00639 | 122177  | 120898  | 1280 | 0.81  | 98.83 |
| scaffold02438 | 6097 | 8962 | 2866 | 31.98 | C_unshiu_00639 | 120290  | 117428  | 2863 | 1.81  | 99.41 |
| scaffold02440 | 2095 | 3964 | 1870 | 20.89 | C_unshiu_02170 | 1       | 1870    | 1870 | 5.43  | 100   |
| scaffold02441 | 1773 | 3557 | 1785 | 19.97 | C_unshiu_00054 | 328454  | 330237  | 1784 | 0.3   | 99.16 |
| scaffold02444 | 1    | 1327 | 1327 | 14.84 | C_unshiu_00573 | 126913  | 128237  | 1325 | 0.77  | 99.4  |
| scaffold02444 | 5047 | 6536 | 1490 | 16.67 | C_unshiu_00795 | 116012  | 117501  | 1490 | 1.16  | 100   |
| scaffold02445 | 6339 | 8938 | 2600 | 29.09 | C_unshiu_00938 | 21463   | 18877   | 2587 | 2.29  | 98.31 |
| scaffold02447 | 1    | 2512 | 2512 | 28.11 | C_unshiu_01316 | 69577   | 72088   | 2512 | 3.32  | 99.88 |
| scaffold02450 | 362  | 4096 | 3735 | 41.89 | C_unshiu_00383 | 214083  | 217787  | 3705 | 1.63  | 98.9  |
| scaffold02450 | 4396 | 6885 | 2490 | 27.93 | C_unshiu_00383 | 218147  | 220637  | 2491 | 1.09  | 99.96 |
| scaffold02452 | 1394 | 4186 | 2793 | 31.44 | C_unshiu_02677 | 15924   | 13137   | 2788 | 13.69 | 99.64 |
| scaffold02453 | 7824 | 8865 | 1042 | 11.75 | C_unshiu_02487 | 18481   | 17445   | 1037 | 4.15  | 99.52 |
| scaffold02454 | 882  | 4252 | 3371 | 37.95 | C_unshiu_00155 | 256070  | 252689  | 3382 | 0.89  | 99.38 |
| scaffold02456 | 3    | 4466 | 4464 | 50.28 | C_unshiu_00680 | 5481    | 9917    | 4437 | 2.99  | 98.3  |
| scaffold02457 | 6208 | 8276 | 2069 | 23.32 | C_unshiu_01141 | 18281   | 20349   | 2069 | 2.25  | 100   |
| scaffold02458 | 4    | 2140 | 2137 | 24.08 | C_unshiu_00463 | 144245  | 146384  | 2140 | 1.05  | 99.63 |
| scaffold02459 | 1    | 2366 | 2366 | 26.67 | C_unshiu_00506 | 7611    | 5266    | 2346 | 1.24  | 99.03 |
| scaffold02459 | 1965 | 5012 | 3048 | 34.36 | C_unshiu_01039 | 71329   | 68301   | 3029 | 2.97  | 98.66 |
| scaffold02459 | 5308 | 7050 | 1743 | 19.65 | C_unshiu_00506 | 2617    | 874     | 1744 | 0.92  | 99.37 |
| scaffold02460 | 1    | 1833 | 1833 | 20.68 | C_unshiu_00354 | 168977  | 167149  | 1829 | 0.77  | 98.64 |
| scaffold02460 | 3649 | 4708 | 1060 | 11.96 | C_unshiu_00354 | 165414  | 164355  | 1060 | 0.44  | 98.68 |
| scaffold02461 | 6390 | 7699 | 1310 | 14.77 | C_unshiu_00080 | 335020  | 333732  | 1289 | 0.26  | 98.02 |

|               |      |      |      |       |                |         |         |      |       |       |
|---------------|------|------|------|-------|----------------|---------|---------|------|-------|-------|
| scaffold02463 | 1    | 1175 | 1175 | 13.26 | C_unshiu_00338 | 242238  | 241064  | 1175 | 0.47  | 99.91 |
| scaffold02463 | 1169 | 2941 | 1773 | 20.01 | C_unshiu_00658 | 55898   | 57670   | 1773 | 1.15  | 100   |
| scaffold02464 | 2783 | 8854 | 6072 | 68.58 | C_unshiu_01384 | 1869    | 7942    | 6074 | 8.51  | 99.49 |
| scaffold02465 | 1    | 4183 | 4183 | 47.35 | C_unshiu_00788 | 101565  | 97383   | 4183 | 3.21  | 99.98 |
| scaffold02465 | 5730 | 8835 | 3106 | 35.16 | C_unshiu_00788 | 96237   | 93132   | 3106 | 2.39  | 99.58 |
| scaffold02466 | 1    | 4503 | 4503 | 51.03 | C_unshiu_00054 | 386590  | 382108  | 4483 | 0.75  | 98.38 |
| scaffold02471 | 1    | 8810 | 8810 | 100   | C_unshiu_02525 | 65      | 8863    | 8799 | 36.74 | 99.6  |
| scaffold02472 | 1    | 1541 | 1541 | 17.49 | C_unshiu_00467 | 76611   | 75071   | 1541 | 0.76  | 99.87 |
| scaffold02475 | 1619 | 3564 | 1946 | 22.12 | C_unshiu_00083 | 30648   | 28703   | 1946 | 0.41  | 99.95 |
| scaffold02475 | 6625 | 8798 | 2174 | 24.71 | C_unshiu_00702 | 33567   | 35742   | 2176 | 1.52  | 99.72 |
| scaffold02476 | 18   | 8796 | 8779 | 99.81 | C_unshiu_00472 | 30209   | 38986   | 8778 | 4.37  | 99.91 |
| scaffold02477 | 1    | 2015 | 2015 | 22.94 | C_unshiu_00941 | 14506   | 12492   | 2015 | 1.79  | 100   |
| scaffold02478 | 3012 | 8782 | 5771 | 65.71 | C_unshiu_00502 | 134130  | 128393  | 5738 | 3     | 98.31 |
| scaffold02481 | 4919 | 7703 | 2785 | 31.72 | C_unshiu_00144 | 330879  | 333666  | 2788 | 0.7   | 98.46 |
| scaffold02481 | 7704 | 8779 | 1076 | 12.26 | C_unshiu_00725 | 126114  | 127191  | 1078 | 0.77  | 99.17 |
| scaffold02483 | 1    | 8771 | 8771 | 100   | C_unshiu_01284 | 35580   | 26788   | 8793 | 11.21 | 99.37 |
| scaffold02484 | 3440 | 5779 | 2340 | 26.69 | C_unshiu_01270 | 21362   | 19029   | 2334 | 2.94  | 99.15 |
| scaffold02484 | 4400 | 6228 | 1829 | 20.86 | C_unshiu_00484 | 107691  | 109521  | 1831 | 0.93  | 98.58 |
| scaffold02488 | 4041 | 5356 | 1316 | 15.03 | C_unshiu_00065 | 136013  | 137332  | 1320 | 0.24  | 99.09 |
| scaffold02489 | 1    | 2413 | 2413 | 27.57 | C_unshiu_00001 | 112795  | 115222  | 2428 | 0.09  | 98.56 |
| scaffold02490 | 4079 | 5212 | 1134 | 12.97 | C_unshiu_00486 | 194001  | 192868  | 1134 | 0.58  | 100   |
| scaffold02493 | 1213 | 4501 | 3289 | 37.67 | C_unshiu_00117 | 393588  | 396880  | 3293 | 0.76  | 99.58 |
| scaffold02500 | 1    | 1028 | 1028 | 11.82 | C_unshiu_00374 | 68219   | 67191   | 1029 | 0.44  | 99.42 |
| scaffold02504 | 1    | 1713 | 1713 | 19.75 | C_unshiu_00667 | 147544  | 149256  | 1713 | 1.12  | 100   |
| scaffold02504 | 7403 | 8674 | 1272 | 14.66 | C_unshiu_00910 | 1193    | 2464    | 1272 | 1.1   | 100   |
| scaffold02506 | 1    | 3911 | 3911 | 45.18 | C_unshiu_02572 | 15991   | 12080   | 3912 | 17.22 | 99.95 |
| scaffold02506 | 3915 | 5620 | 1706 | 19.71 | C_unshiu_01298 | 74205   | 72507   | 1699 | 2.19  | 99.12 |
| scaffold02508 | 3444 | 7813 | 4370 | 50.55 | C_unshiu_00104 | 298158  | 302527  | 4370 | 0.97  | 100   |
| scaffold02509 | 4310 | 5423 | 1114 | 12.88 | C_unshiu_01793 | 11670   | 10557   | 1114 | 2.29  | 98.92 |
| scaffold02509 | 7385 | 8648 | 1264 | 14.62 | C_unshiu_01793 | 8292    | 7029    | 1264 | 2.59  | 100   |
| scaffold02511 | 1270 | 2287 | 1018 | 11.78 | C_unshiu_00248 | 170058  | 171088  | 1031 | 0.35  | 98.06 |
| scaffold02513 | 1    | 2123 | 2123 | 24.58 | C_unshiu_01635 | 5339    | 3218    | 2122 | 3.81  | 98.92 |
| scaffold02514 | 1    | 1271 | 1271 | 14.72 | C_unshiu_02005 | 23485   | 24755   | 1271 | 3.14  | 100   |
| scaffold02514 | 3112 | 8635 | 5524 | 63.97 | C_unshiu_02005 | 25916   | 31440   | 5525 | 13.64 | 99.1  |
| scaffold02516 | 1    | 1575 | 1575 | 18.28 | C_unshiu_01162 | 50381   | 48807   | 1575 | 1.76  | 99.94 |
| scaffold02517 | 1    | 1611 | 1611 | 18.72 | C_unshiu_01092 | 77600   | 75995   | 1606 | 1.66  | 99.63 |
| scaffold02518 | 1    | 4039 | 4039 | 46.97 | C_unshiu_00001 | 2561677 | 2565718 | 4042 | 0.15  | 99.16 |
| scaffold02519 | 772  | 1783 | 1012 | 11.77 | C_unshiu_01182 | 64896   | 65907   | 1012 | 1.16  | 100   |
| scaffold02519 | 1783 | 4303 | 2521 | 29.32 | C_unshiu_01469 | 12820   | 10300   | 2521 | 3.85  | 99.64 |
| scaffold02520 | 1    | 1644 | 1644 | 19.15 | C_unshiu_00843 | 93154   | 94798   | 1645 | 1.33  | 99.33 |
| scaffold02520 | 3567 | 5588 | 2022 | 23.55 | C_unshiu_00529 | 160595  | 162616  | 2022 | 1.1   | 100   |
| scaffold02522 | 1    | 1836 | 1836 | 21.38 | C_unshiu_01989 | 17497   | 19332   | 1836 | 4.49  | 99.35 |
| scaffold02524 | 1319 | 2675 | 1357 | 15.82 | C_unshiu_00079 | 16753   | 18109   | 1357 | 0.27  | 100   |
| scaffold02524 | 5446 | 8577 | 3132 | 36.52 | C_unshiu_00496 | 147292  | 150425  | 3134 | 1.63  | 99.78 |
| scaffold02525 | 6639 | 8562 | 1924 | 22.47 | C_unshiu_00087 | 370048  | 368125  | 1924 | 0.41  | 99.95 |
| scaffold02526 | 1766 | 8077 | 6312 | 73.73 | C_unshiu_00845 | 120076  | 113760  | 6317 | 5.13  | 99.13 |
| scaffold02526 | 6185 | 8561 | 2377 | 27.77 | C_unshiu_00624 | 67262   | 64872   | 2391 | 1.48  | 98.12 |
| scaffold02527 | 3498 | 4524 | 1027 | 12    | C_unshiu_01034 | 82633   | 81607   | 1027 | 1     | 100   |
| scaffold02529 | 1    | 2574 | 2574 | 30.14 | C_unshiu_01452 | 55231   | 57804   | 2574 | 3.87  | 100   |
| scaffold02529 | 4585 | 6830 | 2246 | 26.3  | C_unshiu_01452 | 60365   | 62609   | 2245 | 3.38  | 99.82 |
| scaffold02530 | 3588 | 8244 | 4657 | 54.46 | C_unshiu_00069 | 377611  | 372949  | 4663 | 0.89  | 99.23 |
| scaffold02531 | 834  | 3216 | 2383 | 27.93 | C_unshiu_00215 | 54930   | 52536   | 2395 | 0.74  | 98.29 |
| scaffold02532 | 2716 | 4252 | 1537 | 18.02 | C_unshiu_01015 | 92194   | 93731   | 1538 | 1.47  | 99.87 |
| scaffold02532 | 5496 | 6817 | 1322 | 15.5  | C_unshiu_00157 | 137242  | 135921  | 1322 | 0.35  | 100   |
| scaffold02532 | 6811 | 7895 | 1085 | 12.72 | C_unshiu_01015 | 96886   | 97970   | 1085 | 1.04  | 99.82 |
| scaffold02534 | 1    | 1547 | 1547 | 18.13 | C_unshiu_00915 | 70132   | 68601   | 1532 | 1.33  | 98.39 |
| scaffold02535 | 1    | 3544 | 3544 | 41.61 | C_unshiu_00121 | 303985  | 307531  | 3547 | 0.84  | 99.07 |
| scaffold02535 | 4630 | 8272 | 3643 | 42.77 | C_unshiu_00121 | 307533  | 311166  | 3634 | 0.86  | 99.51 |
| scaffold02537 | 7100 | 8499 | 1400 | 16.47 | C_unshiu_00609 | 40381   | 38982   | 1400 | 0.85  | 99.5  |
| scaffold02538 | 3739 | 4778 | 1040 | 12.26 | C_unshiu_00695 | 17232   | 18256   | 1025 | 0.71  | 98.56 |
| scaffold02538 | 4833 | 8073 | 3241 | 38.21 | C_unshiu_00695 | 18252   | 21486   | 3235 | 2.24  | 99.63 |
| scaffold02539 | 1    | 2632 | 2632 | 31.17 | C_unshiu_00165 | 130292  | 132915  | 2624 | 0.71  | 98.75 |
| scaffold02539 | 2651 | 3727 | 1077 | 12.76 | C_unshiu_00165 | 138275  | 139353  | 1079 | 0.29  | 99.81 |
| scaffold02539 | 4568 | 5567 | 1000 | 11.84 | C_unshiu_01623 | 18435   | 17436   | 1000 | 1.77  | 100   |
| scaffold02540 | 1    | 2126 | 2126 | 25.08 | C_unshiu_00444 | 143910  | 141812  | 2099 | 1     | 98.12 |
| scaffold02542 | 838  | 2523 | 1686 | 19.88 | C_unshiu_01646 | 19918   | 21603   | 1686 | 3.05  | 100   |
| scaffold02542 | 2524 | 4152 | 1629 | 19.21 | C_unshiu_02006 | 37281   | 35654   | 1628 | 4.02  | 99.94 |
| scaffold02542 | 7024 | 8481 | 1458 | 17.19 | C_unshiu_02006 | 32459   | 31002   | 1458 | 3.6   | 100   |
| scaffold02544 | 1    | 6209 | 6209 | 73.27 | C_unshiu_00805 | 37243   | 43462   | 6220 | 4.87  | 99.57 |
| scaffold02547 | 1    | 4032 | 4032 | 47.9  | C_unshiu_01175 | 29255   | 25229   | 4027 | 4.58  | 99.7  |
| scaffold02549 | 1584 | 2685 | 1102 | 13.11 | C_unshiu_00313 | 121423  | 120322  | 1102 | 0.43  | 100   |
| scaffold02549 | 7261 | 8404 | 1144 | 13.61 | C_unshiu_00668 | 141742  | 142890  | 1149 | 0.75  | 98.87 |
| scaffold02550 | 1    | 1996 | 1996 | 23.77 | C_unshiu_00925 | 69363   | 67344   | 2020 | 1.77  | 98.17 |
| scaffold02551 | 5871 | 6899 | 1029 | 12.23 | C_unshiu_01460 | 18751   | 17718   | 1034 | 1.57  | 99.52 |
| scaffold02553 | 85   | 2115 | 2031 | 24.19 | C_unshiu_01210 | 61451   | 63481   | 2031 | 2.41  | 100   |
| scaffold02557 | 6473 | 8352 | 1880 | 22.51 | C_unshiu_01142 | 10917   | 12802   | 1886 | 2.06  | 99.68 |
| scaffold02558 | 1    | 1310 | 1310 | 15.65 | C_unshiu_00518 | 51270   | 52582   | 1313 | 0.71  | 98.32 |
| scaffold02560 | 927  | 5378 | 4452 | 53.2  | C_unshiu_01688 | 40405   | 35956   | 4450 | 8.4   | 99.96 |
| scaffold02562 | 1    | 1767 | 1767 | 21.19 | C_unshiu_00390 | 175078  | 176835  | 1758 | 0.78  | 99.49 |

|               |      |      |      |       |                |         |         |      |       |       |
|---------------|------|------|------|-------|----------------|---------|---------|------|-------|-------|
| scaffold02562 | 6866 | 7989 | 1124 | 13.48 | C_unshiu_00390 | 182763  | 183899  | 1137 | 0.5   | 98.15 |
| scaffold02563 | 226  | 2106 | 1881 | 22.56 | C_unshiu_00648 | 55749   | 53868   | 1882 | 1.2   | 99.63 |
| scaffold02563 | 4927 | 7645 | 2719 | 32.61 | C_unshiu_00766 | 72503   | 69786   | 2718 | 2.04  | 99.96 |
| scaffold02565 | 6545 | 7702 | 1158 | 13.9  | C_unshiu_00664 | 81834   | 80680   | 1155 | 0.75  | 98.27 |
| scaffold02570 | 2    | 8322 | 8321 | 99.99 | C_unshiu_00056 | 366525  | 374862  | 8338 | 1.41  | 98.02 |
| scaffold02571 | 2586 | 4080 | 1495 | 17.97 | C_unshiu_03035 | 5184    | 3690    | 1495 | 12.54 | 100   |
| scaffold02571 | 5432 | 7374 | 1943 | 23.35 | C_unshiu_03035 | 1950    | 1       | 1950 | 16.36 | 98.16 |
| scaffold02572 | 1    | 4025 | 4025 | 48.41 | C_unshiu_01703 | 41021   | 36980   | 4042 | 7.73  | 98.05 |
| scaffold02572 | 5881 | 7002 | 1122 | 13.49 | C_unshiu_01703 | 34365   | 33246   | 1120 | 2.14  | 98.13 |
| scaffold02573 | 6068 | 8166 | 2099 | 25.27 | C_unshiu_00120 | 297163  | 295058  | 2106 | 0.5   | 99    |
| scaffold02574 | 2852 | 3859 | 1008 | 12.13 | C_unshiu_00574 | 105339  | 104331  | 1009 | 0.59  | 98.61 |
| scaffold02574 | 3859 | 5373 | 1515 | 18.24 | C_unshiu_01148 | 78396   | 79910   | 1515 | 1.66  | 99.14 |
| scaffold02574 | 6089 | 8307 | 2219 | 26.71 | C_unshiu_00989 | 87995   | 85777   | 2219 | 2.06  | 100   |
| scaffold02575 | 3031 | 6605 | 3575 | 43.05 | C_unshiu_00085 | 64878   | 61279   | 3600 | 0.76  | 98.75 |
| scaffold02577 | 5482 | 7184 | 1703 | 20.51 | C_unshiu_00938 | 50087   | 48379   | 1709 | 1.51  | 98.89 |
| scaffold02579 | 6820 | 8293 | 1474 | 17.77 | C_unshiu_00355 | 24046   | 25528   | 1483 | 0.62  | 99.26 |
| scaffold02580 | 1775 | 3659 | 1885 | 22.75 | C_unshiu_00050 | 117429  | 115545  | 1885 | 0.31  | 100   |
| scaffold02582 | 7058 | 8268 | 1211 | 14.65 | C_unshiu_00080 | 293292  | 292084  | 1209 | 0.25  | 99.67 |
| scaffold02583 | 1    | 1008 | 1008 | 12.21 | C_unshiu_00175 | 159391  | 160398  | 1008 | 0.28  | 98.91 |
| scaffold02587 | 1    | 1102 | 1102 | 13.35 | C_unshiu_01328 | 60828   | 61929   | 1102 | 1.46  | 99.64 |
| scaffold02587 | 1099 | 6611 | 5513 | 66.81 | C_unshiu_01818 | 28111   | 22599   | 5513 | 11.52 | 100   |
| scaffold02589 | 1    | 1033 | 1033 | 12.55 | C_unshiu_00126 | 408910  | 409942  | 1033 | 0.25  | 100   |
| scaffold02589 | 3012 | 4312 | 1301 | 15.81 | C_unshiu_00051 | 582382  | 581088  | 1295 | 0.22  | 99.31 |
| scaffold02589 | 4960 | 8230 | 3271 | 39.74 | C_unshiu_00051 | 595263  | 598530  | 3268 | 0.54  | 99.27 |
| scaffold02590 | 3189 | 8232 | 5044 | 61.27 | C_unshiu_00935 | 30031   | 35078   | 5048 | 4.46  | 99.03 |
| scaffold02592 | 6454 | 8228 | 1775 | 21.57 | C_unshiu_00214 | 276223  | 274449  | 1775 | 0.55  | 100   |
| scaffold02593 | 445  | 3148 | 2704 | 32.96 | C_unshiu_02024 | 39706   | 37022   | 2685 | 6.76  | 98.59 |
| scaffold02593 | 4206 | 6311 | 2106 | 25.67 | C_unshiu_02024 | 37033   | 34930   | 2104 | 5.3   | 99.05 |
| scaffold02593 | 6951 | 8023 | 1073 | 13.08 | C_unshiu_02024 | 34932   | 33860   | 1073 | 2.7   | 99.35 |
| scaffold02594 | 1    | 1957 | 1957 | 23.87 | C_unshiu_00792 | 96880   | 94924   | 1957 | 1.51  | 99.69 |
| scaffold02594 | 2197 | 4043 | 1847 | 22.53 | C_unshiu_02946 | 1840    | 1       | 1840 | 12.55 | 98.65 |
| scaffold02596 | 1319 | 2618 | 1300 | 15.83 | C_unshiu_02832 | 5177    | 6480    | 1304 | 7.63  | 98.77 |
| scaffold02596 | 2619 | 3787 | 1169 | 14.23 | C_unshiu_02832 | 7361    | 8528    | 1168 | 6.84  | 99.57 |
| scaffold02596 | 7189 | 8214 | 1026 | 12.49 | C_unshiu_00151 | 258145  | 259176  | 1032 | 0.27  | 98.74 |
| scaffold02598 | 1448 | 3157 | 1710 | 20.87 | C_unshiu_00009 | 744690  | 742987  | 1704 | 0.16  | 98.42 |
| scaffold02598 | 6342 | 7642 | 1301 | 15.88 | C_unshiu_00009 | 739311  | 738009  | 1303 | 0.12  | 98.16 |
| scaffold02600 | 1    | 1491 | 1491 | 18.21 | C_unshiu_00411 | 22865   | 24359   | 1495 | 0.68  | 99.46 |
| scaffold02601 | 1    | 1219 | 1219 | 14.9  | C_unshiu_00266 | 253602  | 254820  | 1219 | 0.43  | 100   |
| scaffold02601 | 3238 | 4267 | 1030 | 12.59 | C_unshiu_00266 | 256686  | 257716  | 1031 | 0.36  | 99.81 |
| scaffold02601 | 7041 | 8183 | 1143 | 13.97 | C_unshiu_00266 | 276540  | 277682  | 1143 | 0.4   | 99.56 |
| scaffold02602 | 1    | 2466 | 2466 | 30.21 | C_unshiu_00046 | 48440   | 45976   | 2465 | 0.39  | 98.18 |
| scaffold02603 | 625  | 1680 | 1056 | 12.91 | C_unshiu_00933 | 71542   | 72597   | 1056 | 0.93  | 100   |
| scaffold02603 | 2243 | 4676 | 2434 | 29.76 | C_unshiu_00078 | 403654  | 401221  | 2434 | 0.49  | 98.85 |
| scaffold02605 | 998  | 3381 | 2384 | 29.18 | C_unshiu_00357 | 228785  | 226389  | 2397 | 1.01  | 98.29 |
| scaffold02608 | 1    | 1796 | 1796 | 21.99 | C_unshiu_02207 | 26138   | 24343   | 1796 | 5.44  | 99.55 |
| scaffold02608 | 3417 | 4468 | 1052 | 12.88 | C_unshiu_00685 | 5928    | 6979    | 1052 | 0.71  | 100   |
| scaffold02610 | 1    | 2045 | 2045 | 25.06 | C_unshiu_00208 | 250200  | 252236  | 2037 | 0.62  | 98.14 |
| scaffold02611 | 1    | 1186 | 1186 | 14.55 | C_unshiu_01814 | 11083   | 9900    | 1184 | 2.47  | 98.23 |
| scaffold02611 | 1185 | 8154 | 6970 | 85.48 | C_unshiu_01814 | 9632    | 2669    | 6964 | 14.52 | 99.51 |
| scaffold02612 | 4956 | 7438 | 2483 | 30.46 | C_unshiu_00809 | 109113  | 111601  | 2489 | 1.95  | 99.08 |
| scaffold02613 | 5469 | 8152 | 2684 | 32.92 | C_unshiu_01660 | 382     | 3061    | 2680 | 4.9   | 99.07 |
| scaffold02614 | 1    | 1910 | 1910 | 23.44 | C_unshiu_00001 | 1497259 | 1495370 | 1890 | 0.07  | 98.43 |
| scaffold02615 | 1610 | 3823 | 2214 | 27.19 | C_unshiu_00456 | 174382  | 176589  | 2208 | 1.08  | 98.06 |
| scaffold02616 | 2470 | 3722 | 1253 | 15.38 | C_unshiu_00427 | 112548  | 111297  | 1252 | 0.58  | 98.88 |
| scaffold02617 | 771  | 1816 | 1046 | 12.84 | C_unshiu_00063 | 85854   | 86900   | 1047 | 0.19  | 99.81 |
| scaffold02617 | 5718 | 6742 | 1025 | 12.58 | C_unshiu_00063 | 88976   | 90001   | 1026 | 0.18  | 99.9  |
| scaffold02619 | 6805 | 8131 | 1327 | 16.32 | C_unshiu_02527 | 8159    | 6833    | 1327 | 5.55  | 99.92 |
| scaffold02621 | 1    | 1128 | 1128 | 13.89 | C_unshiu_01716 | 50863   | 49736   | 1128 | 2.17  | 99.29 |
| scaffold02621 | 549  | 1814 | 1266 | 15.59 | C_unshiu_01368 | 19510   | 18250   | 1261 | 1.72  | 99.21 |
| scaffold02621 | 6252 | 7497 | 1246 | 15.34 | C_unshiu_01716 | 44373   | 43128   | 1246 | 0.74  | 99.28 |
| scaffold02622 | 1    | 1012 | 1012 | 12.48 | C_unshiu_00085 | 327911  | 328926  | 1016 | 0.22  | 98.52 |
| scaffold02622 | 1814 | 3282 | 1469 | 18.11 | C_unshiu_00888 | 28348   | 26880   | 1469 | 1.24  | 100   |
| scaffold02622 | 6628 | 8112 | 1485 | 18.31 | C_unshiu_00085 | 335539  | 337023  | 1485 | 0.31  | 99.8  |
| scaffold02624 | 6739 | 8102 | 1364 | 16.84 | C_unshiu_01273 | 6817    | 5454    | 1364 | 1.72  | 99.34 |
| scaffold02626 | 1    | 2150 | 2150 | 26.61 | C_unshiu_00317 | 197546  | 199695  | 2150 | 0.83  | 100   |
| scaffold02626 | 5723 | 8081 | 2359 | 29.19 | C_unshiu_00317 | 203874  | 206232  | 2359 | 0.91  | 100   |
| scaffold02627 | 1    | 2059 | 2059 | 25.49 | C_unshiu_01130 | 54689   | 56747   | 2059 | 2.22  | 100   |
| scaffold02627 | 2150 | 7514 | 5365 | 66.41 | C_unshiu_01130 | 57053   | 62416   | 5364 | 5.79  | 99.85 |
| scaffold02628 | 1936 | 4295 | 2360 | 29.22 | C_unshiu_00325 | 119236  | 121604  | 2369 | 0.93  | 98.4  |
| scaffold02629 | 1    | 1162 | 1162 | 14.39 | C_unshiu_00942 | 4431    | 3269    | 1163 | 1.04  | 99.91 |
| scaffold02632 | 1    | 1085 | 1085 | 13.44 | C_unshiu_02077 | 35356   | 36440   | 1085 | 2.9   | 100   |
| scaffold02634 | 1    | 2785 | 2785 | 34.52 | C_unshiu_01840 | 42877   | 45641   | 2765 | 5.9   | 98.49 |
| scaffold02634 | 138  | 8067 | 7930 | 98.3  | C_unshiu_00459 | 81165   | 89091   | 7927 | 3.86  | 99.53 |
| scaffold02638 | 6781 | 7969 | 1189 | 14.78 | C_unshiu_00025 | 684377  | 685556  | 1180 | 0.16  | 99.16 |
| scaffold02639 | 6006 | 8037 | 2032 | 25.28 | C_unshiu_00359 | 199954  | 201985  | 2032 | 0.86  | 99.95 |
| scaffold02642 | 1    | 6902 | 6902 | 86.08 | C_unshiu_00322 | 59838   | 66783   | 6946 | 2.72  | 98.19 |
| scaffold02650 | 1    | 1124 | 1124 | 14.05 | C_unshiu_00302 | 25110   | 23984   | 1127 | 0.42  | 99.65 |
| scaffold02650 | 3629 | 5467 | 1839 | 22.98 | C_unshiu_02122 | 15730   | 13892   | 1839 | 5.13  | 100   |
| scaffold02650 | 5462 | 7556 | 2095 | 26.18 | C_unshiu_00302 | 19460   | 17366   | 2095 | 0.79  | 100   |

|               |      |      |      |       |                |        |        |      |       |       |
|---------------|------|------|------|-------|----------------|--------|--------|------|-------|-------|
| scaffold02651 | 6001 | 7299 | 1299 | 16.26 | C_unshiu_00186 | 303830 | 305142 | 1313 | 0.38  | 98.78 |
| scaffold02652 | 1    | 2774 | 2774 | 34.71 | C_unshiu_00687 | 143570 | 146345 | 2776 | 1.89  | 99.28 |
| scaffold02652 | 4765 | 7992 | 3228 | 40.39 | C_unshiu_00197 | 299187 | 302407 | 3221 | 0.95  | 99.29 |
| scaffold02653 | 1    | 3251 | 3251 | 40.92 | C_unshiu_01593 | 54467  | 57714  | 3248 | 5.62  | 98.07 |
| scaffold02654 | 3090 | 5602 | 2513 | 31.53 | C_unshiu_02648 | 2214   | 4716   | 2503 | 11.99 | 99.2  |
| scaffold02654 | 5962 | 7969 | 2008 | 25.2  | C_unshiu_02648 | 4897   | 6905   | 2009 | 9.62  | 99.7  |
| scaffold02657 | 1    | 5190 | 5190 | 65.23 | C_unshiu_01366 | 18522  | 23705  | 5184 | 7.07  | 99    |
| scaffold02657 | 5235 | 7265 | 2031 | 25.52 | C_unshiu_01366 | 23611  | 25649  | 2039 | 2.78  | 99.17 |
| scaffold02658 | 1    | 1705 | 1705 | 21.4  | C_unshiu_00302 | 38296  | 40004  | 1709 | 0.64  | 99.24 |
| scaffold02659 | 1    | 6383 | 6383 | 80.27 | C_unshiu_00344 | 222455 | 216066 | 6390 | 2.58  | 98.77 |
| scaffold02663 | 1    | 1071 | 1071 | 13.5  | C_unshiu_00207 | 240672 | 239602 | 1071 | 0.32  | 99.91 |
| scaffold02663 | 1065 | 2371 | 1307 | 16.48 | C_unshiu_00207 | 236329 | 235023 | 1307 | 0.4   | 100   |
| scaffold02665 | 1    | 2484 | 2484 | 31.35 | C_unshiu_00218 | 286459 | 283997 | 2463 | 0.77  | 98.63 |
| scaffold02665 | 2098 | 3261 | 1164 | 14.69 | C_unshiu_00958 | 530    | 1694   | 1165 | 1.05  | 98.97 |
| scaffold02665 | 3846 | 4912 | 1067 | 13.47 | C_unshiu_00958 | 1      | 1067   | 1067 | 0.96  | 100   |
| scaffold02665 | 6039 | 7924 | 1886 | 23.8  | C_unshiu_00958 | 3261   | 5139   | 1879 | 1.7   | 98.42 |
| scaffold02666 | 3109 | 5521 | 2413 | 30.46 | C_unshiu_00881 | 97127  | 99542  | 2416 | 2.03  | 99.42 |
| scaffold02666 | 6853 | 7922 | 1070 | 13.51 | C_unshiu_02191 | 30985  | 32053  | 1069 | 3.19  | 99.35 |
| scaffold02667 | 1    | 1793 | 1793 | 22.64 | C_unshiu_00084 | 179743 | 177950 | 1794 | 0.38  | 99.78 |
| scaffold02668 | 1    | 1323 | 1323 | 16.71 | C_unshiu_02279 | 19588  | 18265  | 1324 | 4.36  | 98.11 |
| scaffold02668 | 1330 | 4360 | 3031 | 38.28 | C_unshiu_01625 | 53123  | 56161  | 3039 | 5.4   | 98.23 |
| scaffold02668 | 1330 | 4360 | 3031 | 38.28 | C_unshiu_02279 | 16757  | 13727  | 3031 | 9.98  | 98.65 |
| scaffold02668 | 5563 | 6741 | 1179 | 14.89 | C_unshiu_00422 | 165027 | 163849 | 1179 | 0.54  | 100   |
| scaffold02668 | 6744 | 7917 | 1174 | 14.83 | C_unshiu_02279 | 11024  | 9852   | 1173 | 3.86  | 99.74 |
| scaffold02669 | 6386 | 7545 | 1160 | 14.65 | C_unshiu_00730 | 9389   | 8234   | 1156 | 0.83  | 98.1  |
| scaffold02670 | 684  | 3245 | 2562 | 32.39 | C_unshiu_00518 | 140947 | 138395 | 2553 | 1.38  | 98.1  |
| scaffold02673 | 1    | 7899 | 7899 | 100   | C_unshiu_01326 | 59697  | 51799  | 7899 | 10.49 | 100   |
| scaffold02676 | 1    | 5998 | 5998 | 76.01 | C_unshiu_00871 | 88088  | 94020  | 5933 | 4.94  | 98.35 |
| scaffold02677 | 283  | 1378 | 1096 | 13.89 | C_unshiu_01247 | 52809  | 53905  | 1097 | 1.35  | 99.36 |
| scaffold02681 | 1    | 4964 | 4964 | 63.06 | C_unshiu_00602 | 143171 | 138212 | 4960 | 2.97  | 99.48 |
| scaffold02682 | 1    | 3585 | 3585 | 45.63 | C_unshiu_00719 | 20764  | 17204  | 3561 | 2.52  | 98.52 |
| scaffold02682 | 3608 | 6382 | 2775 | 35.32 | C_unshiu_00719 | 17089  | 14315  | 2775 | 1.96  | 100   |
| scaffold02684 | 4159 | 7847 | 3689 | 47.01 | C_unshiu_00313 | 250833 | 247159 | 3675 | 1.42  | 99.19 |
| scaffold02686 | 5302 | 6928 | 1627 | 20.73 | C_unshiu_00059 | 447704 | 446079 | 1626 | 0.28  | 98.9  |
| scaffold02689 | 1    | 7832 | 7832 | 100   | C_unshiu_01909 | 41384  | 33551  | 7834 | 17.7  | 99.97 |
| scaffold02690 | 5001 | 7065 | 2065 | 26.38 | C_unshiu_02997 | 12973  | 10909  | 2065 | 15.89 | 100   |
| scaffold02693 | 1    | 1290 | 1290 | 16.53 | C_unshiu_00264 | 12953  | 11662  | 1292 | 0.45  | 99.46 |
| scaffold02693 | 2346 | 7806 | 5461 | 69.96 | C_unshiu_00264 | 11098  | 5613   | 5486 | 1.93  | 99.38 |
| scaffold02695 | 1    | 1789 | 1789 | 22.9  | C_unshiu_00924 | 97290  | 95483  | 1808 | 1.58  | 98.34 |
| scaffold02696 | 849  | 7811 | 6963 | 89.14 | C_unshiu_00088 | 41898  | 34968  | 6931 | 1.47  | 98.47 |
| scaffold02697 | 3119 | 4283 | 1165 | 14.91 | C_unshiu_00163 | 344893 | 346060 | 1168 | 0.32  | 99.74 |
| scaffold02699 | 1    | 6798 | 6798 | 87.13 | C_unshiu_02211 | 5673   | 12472  | 6800 | 20.69 | 99.97 |
| scaffold02699 | 3502 | 7802 | 4301 | 55.13 | C_unshiu_02211 | 15584  | 19884  | 4301 | 13.09 | 100   |
| scaffold02702 | 3870 | 5401 | 1532 | 19.7  | C_unshiu_00669 | 124255 | 125789 | 1535 | 1.01  | 99.8  |
| scaffold02703 | 1    | 1070 | 1070 | 13.76 | C_unshiu_03033 | 5294   | 6363   | 1070 | 8.92  | 99.91 |
| scaffold02703 | 3782 | 4900 | 1119 | 14.39 | C_unshiu_03033 | 11062  | 9946   | 1117 | 9.31  | 98.93 |
| scaffold02703 | 4901 | 7115 | 2215 | 28.49 | C_unshiu_00102 | 38803  | 36589  | 2215 | 0.49  | 100   |
| scaffold02704 | 1    | 3674 | 3674 | 47.25 | C_unshiu_00572 | 21166  | 17494  | 3673 | 2.13  | 98.32 |
| scaffold02704 | 6456 | 7775 | 1320 | 16.98 | C_unshiu_00572 | 13690  | 12371  | 1320 | 0.76  | 99.85 |
| scaffold02705 | 6648 | 7772 | 1125 | 14.48 | C_unshiu_00711 | 125997 | 124872 | 1126 | 0.79  | 98.76 |
| scaffold02706 | 1    | 1134 | 1134 | 14.59 | C_unshiu_01197 | 61465  | 60323  | 1143 | 1.33  | 98.69 |
| scaffold02708 | 1648 | 3385 | 1738 | 22.38 | C_unshiu_00232 | 47066  | 48809  | 1744 | 0.57  | 99.14 |
| scaffold02708 | 6293 | 7765 | 1473 | 18.97 | C_unshiu_00232 | 52396  | 53872  | 1477 | 0.48  | 99.05 |
| scaffold02709 | 36   | 7765 | 7730 | 99.55 | C_unshiu_00580 | 157887 | 165607 | 7721 | 4.5   | 99.65 |
| scaffold02714 | 6387 | 7730 | 1344 | 17.39 | C_unshiu_01095 | 61940  | 63291  | 1352 | 1.4   | 98.67 |
| scaffold02718 | 339  | 2185 | 1847 | 23.94 | C_unshiu_01132 | 6504   | 4657   | 1848 | 2     | 99.08 |
| scaffold02719 | 4    | 1133 | 1130 | 14.66 | C_unshiu_01228 | 67039  | 65907  | 1133 | 1.37  | 98.59 |
| scaffold02721 | 4122 | 5620 | 1499 | 19.48 | C_unshiu_01205 | 33449  | 34942  | 1494 | 1.75  | 99.67 |
| scaffold02721 | 5602 | 7200 | 1599 | 20.78 | C_unshiu_01205 | 25740  | 27338  | 1599 | 1.88  | 99.75 |
| scaffold02722 | 4958 | 7210 | 2253 | 29.26 | C_unshiu_00216 | 101137 | 103395 | 2259 | 0.7   | 99.29 |
| scaffold02723 | 1    | 7701 | 7701 | 100   | C_unshiu_00867 | 110314 | 102615 | 7700 | 6.37  | 99.88 |
| scaffold02727 | 5679 | 7317 | 1639 | 21.37 | C_unshiu_00160 | 16109  | 14466  | 1644 | 0.44  | 98.3  |
| scaffold02729 | 266  | 5458 | 5193 | 67.77 | C_unshiu_01307 | 7259   | 2059   | 5201 | 6.79  | 99    |
| scaffold02730 | 1    | 1352 | 1352 | 17.65 | C_unshiu_02081 | 17473  | 16122  | 1352 | 3.63  | 99.93 |
| scaffold02730 | 6411 | 7659 | 1249 | 16.31 | C_unshiu_02081 | 11346  | 10098  | 1249 | 3.35  | 100   |
| scaffold02731 | 6581 | 7648 | 1068 | 13.96 | C_unshiu_00811 | 93083  | 94150  | 1068 | 0.84  | 100   |
| scaffold02733 | 5572 | 7651 | 2080 | 27.19 | C_unshiu_00521 | 64425  | 62349  | 2077 | 1.12  | 98.99 |
| scaffold02734 | 2117 | 3481 | 1365 | 17.88 | C_unshiu_00173 | 11070  | 9713   | 1358 | 0.37  | 98.75 |
| scaffold02735 | 3636 | 7634 | 3999 | 52.38 | C_unshiu_00806 | 26162  | 22163  | 4000 | 3.13  | 98.75 |
| scaffold02737 | 3627 | 4852 | 1226 | 16.1  | C_unshiu_01308 | 14389  | 15616  | 1228 | 1.61  | 99.19 |
| scaffold02737 | 4956 | 7617 | 2662 | 34.95 | C_unshiu_01308 | 17314  | 19993  | 2680 | 3.51  | 98.03 |
| scaffold02738 | 4769 | 7165 | 2397 | 31.45 | C_unshiu_00763 | 23231  | 25619  | 2389 | 1.77  | 98.71 |
| scaffold02740 | 3702 | 4826 | 1125 | 14.78 | C_unshiu_00181 | 1866   | 2988   | 1123 | 0.31  | 98.85 |
| scaffold02740 | 6339 | 7613 | 1275 | 16.75 | C_unshiu_00181 | 4655   | 5929   | 1275 | 0.36  | 99.69 |
| scaffold02741 | 6513 | 7608 | 1096 | 14.41 | C_unshiu_00319 | 2250   | 3345   | 1096 | 0.43  | 100   |
| scaffold02744 | 1    | 1007 | 1007 | 13.27 | C_unshiu_01527 | 334    | 1340   | 1007 | 1.63  | 99.6  |
| scaffold02744 | 4000 | 6196 | 2197 | 28.95 | C_unshiu_01527 | 4120   | 6327   | 2208 | 3.57  | 98.96 |
| scaffold02745 | 2793 | 4130 | 1338 | 17.64 | C_unshiu_01228 | 81587  | 80254  | 1334 | 1.62  | 99.63 |
| scaffold02745 | 4166 | 7424 | 3259 | 42.96 | C_unshiu_00386 | 204357 | 207615 | 3259 | 1.44  | 99.39 |

|               |      |      |      |       |                |         |         |      |       |       |
|---------------|------|------|------|-------|----------------|---------|---------|------|-------|-------|
| scaffold02747 | 5981 | 7594 | 1614 | 21.25 | C_unshiu_00660 | 6939    | 5330    | 1610 | 1.05  | 99.5  |
| scaffold02751 | 1    | 1510 | 1510 | 19.95 | C_unshiu_01849 | 45384   | 43873   | 1512 | 3.25  | 99.67 |
| scaffold02751 | 1529 | 4335 | 2807 | 37.09 | C_unshiu_01849 | 43779   | 40973   | 2807 | 6.04  | 100   |
| scaffold02752 | 5066 | 7527 | 2462 | 32.71 | C_unshiu_00054 | 271416  | 273877  | 2462 | 0.41  | 99.96 |
| scaffold02755 | 897  | 6863 | 5967 | 78.96 | C_unshiu_00044 | 179162  | 185128  | 5967 | 0.94  | 100   |
| scaffold02756 | 4323 | 5648 | 1326 | 17.56 | C_unshiu_00607 | 136464  | 137789  | 1326 | 0.8   | 100   |
| scaffold02761 | 1    | 1950 | 1950 | 25.87 | C_unshiu_01554 | 46433   | 48387   | 1955 | 3.24  | 99.18 |
| scaffold02762 | 5517 | 6777 | 1261 | 16.75 | C_unshiu_00752 | 108134  | 109398  | 1265 | 0.93  | 98.26 |
| scaffold02763 | 4701 | 6466 | 1766 | 23.45 | C_unshiu_01225 | 5875    | 7641    | 1767 | 2.13  | 99.66 |
| scaffold02763 | 6467 | 7531 | 1065 | 14.14 | C_unshiu_00290 | 10914   | 9850    | 1065 | 0.39  | 100   |
| scaffold02765 | 5062 | 6668 | 1607 | 21.36 | C_unshiu_01182 | 47667   | 46059   | 1609 | 1.85  | 99.81 |
| scaffold02766 | 597  | 3001 | 2405 | 31.98 | C_unshiu_00212 | 162711  | 165115  | 2405 | 0.73  | 100   |
| scaffold02766 | 3253 | 4277 | 1025 | 13.63 | C_unshiu_01688 | 47917   | 46900   | 1018 | 1.92  | 98.93 |
| scaffold02767 | 1    | 1005 | 1005 | 13.37 | C_unshiu_00701 | 48399   | 49403   | 1005 | 0.7   | 100   |
| scaffold02767 | 6012 | 7516 | 1505 | 20.02 | C_unshiu_00701 | 54311   | 55815   | 1505 | 1.05  | 100   |
| scaffold02768 | 946  | 2070 | 1125 | 14.97 | C_unshiu_00001 | 1097493 | 1096363 | 1131 | 0.04  | 98.32 |
| scaffold02768 | 2065 | 6250 | 4186 | 55.71 | C_unshiu_01323 | 23752   | 19567   | 4186 | 5.56  | 100   |
| scaffold02768 | 6254 | 7485 | 1232 | 16.4  | C_unshiu_00001 | 1092725 | 1091491 | 1235 | 0.05  | 99.27 |
| scaffold02769 | 2047 | 5438 | 3392 | 45.16 | C_unshiu_00689 | 33728   | 37119   | 3392 | 2.32  | 100   |
| scaffold02770 | 2950 | 7506 | 4557 | 60.71 | C_unshiu_00581 | 129832  | 134409  | 4578 | 2.67  | 99.15 |
| scaffold02771 | 5465 | 7502 | 2038 | 27.17 | C_unshiu_00362 | 150717  | 152753  | 2037 | 0.86  | 99.75 |
| scaffold02772 | 1242 | 7507 | 6266 | 83.47 | C_unshiu_00412 | 185783  | 191987  | 6205 | 2.81  | 98.01 |
| scaffold02773 | 4    | 3631 | 3628 | 48.44 | C_unshiu_01058 | 70107   | 66480   | 3628 | 3.65  | 99.72 |
| scaffold02775 | 760  | 3366 | 2607 | 34.83 | C_unshiu_00982 | 59966   | 62572   | 2607 | 2.4   | 100   |
| scaffold02775 | 767  | 3399 | 2633 | 35.17 | C_unshiu_01677 | 12043   | 14675   | 2633 | 4.9   | 100   |
| scaffold02775 | 3393 | 7486 | 4094 | 54.69 | C_unshiu_00394 | 100632  | 104726  | 4095 | 1.83  | 99.32 |
| scaffold02779 | 1    | 1418 | 1418 | 18.93 | C_unshiu_00996 | 75801   | 74384   | 1418 | 1.33  | 98.67 |
| scaffold02781 | 3868 | 5641 | 1774 | 23.74 | C_unshiu_01321 | 41671   | 39898   | 1774 | 2.35  | 99.94 |
| scaffold02782 | 5245 | 7467 | 2223 | 29.77 | C_unshiu_00823 | 62692   | 64902   | 2211 | 1.75  | 98.57 |
| scaffold02783 | 1    | 1485 | 1485 | 19.89 | C_unshiu_00363 | 22218   | 23704   | 1487 | 0.63  | 99.39 |
| scaffold02784 | 1    | 4630 | 4630 | 62.02 | C_unshiu_00988 | 72101   | 76721   | 4621 | 4.29  | 99.53 |
| scaffold02784 | 4913 | 6402 | 1490 | 19.96 | C_unshiu_00988 | 77200   | 78687   | 1488 | 1.38  | 99.6  |
| scaffold02787 | 4693 | 6345 | 1653 | 22.22 | C_unshiu_00269 | 67398   | 69048   | 1651 | 0.59  | 98.73 |
| scaffold02788 | 4762 | 7434 | 2673 | 35.96 | C_unshiu_00139 | 222922  | 220230  | 2693 | 0.67  | 99    |
| scaffold02790 | 3519 | 4736 | 1218 | 16.39 | C_unshiu_02858 | 8909    | 7692    | 1218 | 7.33  | 98.04 |
| scaffold02791 | 626  | 3399 | 2774 | 37.38 | C_unshiu_01670 | 35564   | 32791   | 2774 | 5.12  | 100   |
| scaffold02793 | 5588 | 7401 | 1814 | 24.51 | C_unshiu_01062 | 99015   | 97192   | 1824 | 1.84  | 99.07 |
| scaffold02794 | 4844 | 6561 | 1718 | 23.22 | C_unshiu_00329 | 92738   | 91021   | 1718 | 0.68  | 100   |
| scaffold02795 | 1    | 3274 | 3274 | 44.33 | C_unshiu_01448 | 24995   | 28242   | 3248 | 4.87  | 98.72 |
| scaffold02796 | 3135 | 4274 | 1140 | 15.45 | C_unshiu_01638 | 11524   | 10393   | 1132 | 2.04  | 98.07 |
| scaffold02798 | 3446 | 4921 | 1476 | 20.01 | C_unshiu_00497 | 130336  | 128857  | 1480 | 0.77  | 98.85 |
| scaffold02799 | 1    | 1655 | 1655 | 22.46 | C_unshiu_00493 | 155321  | 156974  | 1654 | 0.85  | 98.61 |
| scaffold02800 | 1449 | 7359 | 5911 | 80.2  | C_unshiu_00351 | 114878  | 120789  | 5912 | 2.46  | 99.76 |
| scaffold02804 | 3341 | 4462 | 1122 | 15.26 | C_unshiu_00904 | 16118   | 17239   | 1122 | 0.96  | 100   |
| scaffold02808 | 3319 | 6756 | 3438 | 46.83 | C_unshiu_00850 | 69169   | 65733   | 3437 | 2.8   | 98.2  |
| scaffold02809 | 1616 | 4192 | 2577 | 35.18 | C_unshiu_00224 | 268162  | 270709  | 2548 | 0.81  | 98.03 |
| scaffold02809 | 4441 | 6682 | 2242 | 30.6  | C_unshiu_00224 | 271040  | 273295  | 2256 | 0.72  | 98.4  |
| scaffold02811 | 2542 | 3552 | 1011 | 13.79 | C_unshiu_00980 | 2008    | 3018    | 1011 | 0.93  | 100   |
| scaffold02811 | 3989 | 5747 | 1759 | 23.98 | C_unshiu_00026 | 355134  | 353375  | 1760 | 0.23  | 99.83 |
| scaffold02811 | 6165 | 7334 | 1170 | 15.95 | C_unshiu_00026 | 357227  | 356058  | 1170 | 0.16  | 99.49 |
| scaffold02814 | 3615 | 5476 | 1862 | 25.4  | C_unshiu_00475 | 95957   | 97817   | 1861 | 0.93  | 99.14 |
| scaffold02818 | 4353 | 7298 | 2946 | 40.37 | C_unshiu_00204 | 236880  | 239824  | 2945 | 0.89  | 99.69 |
| scaffold02819 | 4849 | 6793 | 1945 | 26.67 | C_unshiu_00482 | 142170  | 144114  | 1945 | 0.99  | 100   |
| scaffold02824 | 1    | 1004 | 1004 | 13.79 | C_unshiu_01646 | 38164   | 39165   | 1002 | 1.81  | 99.6  |
| scaffold02829 | 5103 | 7266 | 2164 | 29.78 | C_unshiu_02011 | 19536   | 17373   | 2164 | 5.37  | 99.77 |
| scaffold02832 | 8    | 1271 | 1264 | 17.43 | C_unshiu_01560 | 17347   | 16071   | 1277 | 2.13  | 98.2  |
| scaffold02833 | 4417 | 5426 | 1010 | 13.93 | C_unshiu_00714 | 6205    | 5191    | 1015 | 0.72  | 98.62 |
| scaffold02833 | 4584 | 5660 | 1077 | 14.85 | C_unshiu_01443 | 4       | 1080    | 1077 | 1.6   | 100   |
| scaffold02833 | 5988 | 7252 | 1265 | 17.44 | C_unshiu_00714 | 3272    | 2009    | 1264 | 0.89  | 99.92 |
| scaffold02836 | 2993 | 7214 | 4222 | 58.53 | C_unshiu_00082 | 429929  | 425713  | 4217 | 0.89  | 98.82 |
| scaffold02837 | 4989 | 7213 | 2225 | 30.85 | C_unshiu_00593 | 122455  | 124687  | 2233 | 1.32  | 98.48 |
| scaffold02838 | 3174 | 7206 | 4033 | 55.97 | C_unshiu_02658 | 20731   | 16713   | 4019 | 19.39 | 98.02 |
| scaffold02843 | 3827 | 5833 | 2007 | 27.99 | C_unshiu_00095 | 305215  | 303210  | 2006 | 0.43  | 98.66 |
| scaffold02844 | 1    | 1108 | 1108 | 15.44 | C_unshiu_01563 | 52856   | 53963   | 1108 | 1.86  | 100   |
| scaffold02844 | 1276 | 4397 | 3122 | 43.49 | C_unshiu_01563 | 54408   | 57529   | 3122 | 5.24  | 100   |
| scaffold02846 | 1    | 6042 | 6042 | 84.28 | C_unshiu_00351 | 60997   | 54955   | 6043 | 2.52  | 99.98 |
| scaffold02847 | 1    | 7175 | 7175 | 100   | C_unshiu_00261 | 271494  | 264322  | 7173 | 2.51  | 99.65 |
| scaffold02848 | 1    | 7169 | 7169 | 100   | C_unshiu_00604 | 144464  | 151632  | 7169 | 4.31  | 99.99 |
| scaffold02850 | 5451 | 7158 | 1708 | 23.86 | C_unshiu_01364 | 32763   | 34472   | 1710 | 2.33  | 99.24 |
| scaffold02851 | 1    | 1022 | 1022 | 14.27 | C_unshiu_02044 | 23981   | 25000   | 1020 | 2.62  | 98.63 |
| scaffold02851 | 2065 | 4424 | 2360 | 32.96 | C_unshiu_02044 | 26699   | 29064   | 2366 | 6.08  | 98.35 |
| scaffold02851 | 5285 | 6476 | 1192 | 16.65 | C_unshiu_02044 | 29550   | 30741   | 1192 | 3.06  | 99.5  |
| scaffold02854 | 6009 | 7145 | 1137 | 15.91 | C_unshiu_01341 | 49118   | 50255   | 1138 | 1.53  | 98.42 |
| scaffold02859 | 1    | 6916 | 6916 | 97.16 | C_unshiu_01125 | 30735   | 23815   | 6921 | 7.41  | 99.81 |
| scaffold02861 | 2    | 1954 | 1953 | 27.54 | C_unshiu_00374 | 33808   | 31856   | 1953 | 0.84  | 99.54 |
| scaffold02865 | 1881 | 4517 | 2637 | 37.27 | C_unshiu_02589 | 16728   | 19363   | 2636 | 11.74 | 98.08 |
| scaffold02865 | 5949 | 7076 | 1128 | 15.94 | C_unshiu_02589 | 21063   | 22191   | 1129 | 5.03  | 98.94 |
| scaffold02869 | 1    | 1056 | 1056 | 14.96 | C_unshiu_00332 | 70259   | 71315   | 1057 | 0.42  | 99.34 |
| scaffold02869 | 5584 | 7059 | 1476 | 20.91 | C_unshiu_00332 | 77620   | 79095   | 1476 | 0.59  | 99.86 |

|               |      |      |      |       |                |        |        |      |       |       |
|---------------|------|------|------|-------|----------------|--------|--------|------|-------|-------|
| scaffold02871 | 3907 | 7056 | 3150 | 44.64 | C_unshiu_00627 | 33831  | 30682  | 3150 | 1.96  | 99.56 |
| scaffold02872 | 4    | 1643 | 1640 | 23.24 | C_unshiu_00080 | 409530 | 411151 | 1622 | 0.33  | 98.6  |
| scaffold02872 | 1644 | 7054 | 5411 | 76.69 | C_unshiu_00080 | 411749 | 417138 | 5390 | 1.09  | 98.43 |
| scaffold02876 | 2289 | 7036 | 4748 | 67.48 | C_unshiu_01768 | 20979  | 25698  | 4720 | 9.48  | 98.19 |
| scaffold02877 | 1248 | 6998 | 5751 | 82.18 | C_unshiu_00103 | 447269 | 441525 | 5745 | 1.27  | 98.77 |
| scaffold02878 | 2732 | 6990 | 4259 | 60.93 | C_unshiu_01098 | 27338  | 31596  | 4259 | 4.43  | 100   |
| scaffold02881 | 1    | 6457 | 6457 | 92.43 | C_unshiu_00167 | 154273 | 147817 | 6457 | 1.75  | 100   |
| scaffold02885 | 1    | 1352 | 1352 | 19.47 | C_unshiu_00162 | 366794 | 368145 | 1352 | 0.36  | 99.63 |
| scaffold02887 | 1    | 2338 | 2338 | 33.58 | C_unshiu_00502 | 109866 | 107530 | 2337 | 1.22  | 99.49 |
| scaffold02887 | 2343 | 3760 | 1418 | 20.37 | C_unshiu_00502 | 106719 | 105301 | 1419 | 0.74  | 99.79 |
| scaffold02887 | 3883 | 6093 | 2211 | 31.76 | C_unshiu_00502 | 101890 | 99659  | 2232 | 1.17  | 98.03 |
| scaffold02888 | 1    | 5219 | 5219 | 75.13 | C_unshiu_02168 | 2584   | 7802   | 5219 | 15.13 | 99.92 |
| scaffold02888 | 5319 | 6380 | 1062 | 15.29 | C_unshiu_02168 | 7921   | 8983   | 1063 | 3.08  | 99.34 |
| scaffold02889 | 4667 | 5946 | 1280 | 18.44 | C_unshiu_01555 | 31264  | 29982  | 1283 | 2.13  | 99.38 |
| scaffold02890 | 3009 | 4638 | 1630 | 23.48 | C_unshiu_01195 | 29878  | 31507  | 1630 | 1.89  | 100   |
| scaffold02891 | 314  | 2767 | 2454 | 35.39 | C_unshiu_01973 | 17453  | 19906  | 2454 | 5.9   | 99.92 |
| scaffold02891 | 4935 | 6935 | 2001 | 28.85 | C_unshiu_01973 | 21073  | 23072  | 2000 | 4.81  | 99.95 |
| scaffold02892 | 99   | 6910 | 6812 | 98.55 | C_unshiu_01254 | 30240  | 37017  | 6778 | 8.41  | 98.62 |
| scaffold02894 | 1092 | 4089 | 2998 | 43.46 | C_unshiu_00248 | 84293  | 81308  | 2986 | 1.01  | 98.97 |
| scaffold02894 | 5247 | 6898 | 1652 | 23.95 | C_unshiu_00248 | 79859  | 78218  | 1642 | 0.55  | 98.91 |
| scaffold02898 | 24   | 2052 | 2029 | 29.43 | C_unshiu_00046 | 95993  | 93992  | 2002 | 0.31  | 98.23 |
| scaffold02901 | 1    | 4193 | 4193 | 60.87 | C_unshiu_01589 | 40312  | 44520  | 4209 | 7.22  | 99.36 |
| scaffold02902 | 59   | 1619 | 1561 | 22.69 | C_unshiu_00132 | 340531 | 338965 | 1567 | 0.38  | 98.21 |
| scaffold02903 | 4443 | 6877 | 2435 | 35.41 | C_unshiu_00091 | 32406  | 34837  | 2432 | 0.52  | 99.43 |
| scaffold02907 | 3535 | 6861 | 3327 | 48.49 | C_unshiu_00849 | 34262  | 30936  | 3327 | 2.71  | 99.91 |
| scaffold02908 | 4872 | 6854 | 1983 | 28.93 | C_unshiu_00966 | 19573  | 21555  | 1983 | 1.8   | 99.6  |
| scaffold02911 | 1    | 6840 | 6840 | 100   | C_unshiu_00263 | 22016  | 28855  | 6840 | 2.4   | 100   |
| scaffold02912 | 3257 | 6699 | 3443 | 50.34 | C_unshiu_00154 | 78361  | 81800  | 3440 | 0.9   | 98.01 |
| scaffold02913 | 3588 | 5024 | 1437 | 21.02 | C_unshiu_00838 | 34911  | 36347  | 1437 | 1.16  | 99.93 |
| scaffold02915 | 4186 | 5474 | 1289 | 18.87 | C_unshiu_00016 | 336304 | 335018 | 1287 | 0.15  | 98.84 |
| scaffold02919 | 741  | 2539 | 1799 | 26.46 | C_unshiu_00046 | 89446  | 91244  | 1799 | 0.28  | 100   |
| scaffold02919 | 2539 | 4358 | 1820 | 26.77 | C_unshiu_02891 | 8440   | 10259  | 1820 | 11.4  | 99.73 |
| scaffold02919 | 4977 | 6796 | 1820 | 26.77 | C_unshiu_02891 | 11812  | 13628  | 1817 | 11.38 | 99.56 |
| scaffold02920 | 1    | 1045 | 1045 | 15.38 | C_unshiu_00349 | 28604  | 29648  | 1045 | 0.43  | 100   |
| scaffold02920 | 2447 | 4228 | 1782 | 26.23 | C_unshiu_00349 | 30860  | 32641  | 1782 | 0.73  | 100   |
| scaffold02921 | 4    | 2342 | 2339 | 34.33 | C_unshiu_00001 | 3642   | 5972   | 2331 | 0.09  | 98.76 |
| scaffold02921 | 2758 | 4710 | 1953 | 28.66 | C_unshiu_00001 | 6286   | 8238   | 1953 | 0.07  | 99.59 |
| scaffold02921 | 5285 | 6811 | 1527 | 22.41 | C_unshiu_00001 | 10232  | 11766  | 1535 | 0.06  | 99.02 |
| scaffold02923 | 1    | 1321 | 1321 | 19.48 | C_unshiu_00317 | 14562  | 15882  | 1321 | 0.51  | 100   |
| scaffold02923 | 3276 | 6041 | 2766 | 40.78 | C_unshiu_00317 | 17902  | 20674  | 2773 | 1.07  | 98.92 |
| scaffold02925 | 685  | 2001 | 1317 | 19.41 | C_unshiu_00362 | 143116 | 141800 | 1317 | 0.56  | 100   |
| scaffold02925 | 3228 | 6786 | 3559 | 52.45 | C_unshiu_00362 | 140580 | 137017 | 3564 | 1.51  | 99.55 |
| scaffold02926 | 4245 | 6034 | 1790 | 26.43 | C_unshiu_00065 | 35297  | 33491  | 1807 | 0.33  | 98.51 |
| scaffold02928 | 280  | 2274 | 1995 | 29.46 | C_unshiu_01561 | 21521  | 19524  | 1998 | 3.34  | 99.3  |
| scaffold02928 | 2306 | 4157 | 1852 | 27.35 | C_unshiu_01141 | 89921  | 91773  | 1853 | 2.02  | 99.73 |
| scaffold02929 | 855  | 2066 | 1212 | 17.93 | C_unshiu_01165 | 81310  | 80099  | 1212 | 1.35  | 99.34 |
| scaffold02931 | 1    | 3601 | 3601 | 53.31 | C_unshiu_00096 | 19380  | 22972  | 3593 | 0.78  | 99.06 |
| scaffold02934 | 3892 | 4990 | 1099 | 16.3  | C_unshiu_02072 | 25064  | 23966  | 1099 | 2.91  | 98.91 |
| scaffold02934 | 4995 | 6662 | 1668 | 24.74 | C_unshiu_02072 | 23808  | 22141  | 1668 | 4.42  | 99.28 |
| scaffold02937 | 3732 | 5862 | 2131 | 31.61 | C_unshiu_00512 | 144997 | 147126 | 2130 | 1.14  | 99.95 |
| scaffold02940 | 5587 | 6733 | 1147 | 17.04 | C_unshiu_02963 | 522    | 1666   | 1145 | 8.18  | 99.83 |
| scaffold02941 | 3459 | 6690 | 3232 | 48.28 | C_unshiu_00079 | 384307 | 381081 | 3227 | 0.65  | 98.67 |
| scaffold02945 | 1    | 1174 | 1174 | 17.62 | C_unshiu_00496 | 129937 | 128760 | 1178 | 0.61  | 99.24 |
| scaffold02945 | 2718 | 5472 | 2755 | 41.36 | C_unshiu_00496 | 128020 | 125262 | 2759 | 1.43  | 98.99 |
| scaffold02947 | 241  | 1595 | 1355 | 20.24 | C_unshiu_00278 | 11409  | 10054  | 1356 | 0.49  | 99.78 |
| scaffold02947 | 4418 | 5920 | 1503 | 22.45 | C_unshiu_00278 | 6990   | 5488   | 1503 | 0.54  | 99.07 |
| scaffold02949 | 1    | 6678 | 6678 | 100   | C_unshiu_00683 | 55555  | 48860  | 6696 | 4.51  | 98.59 |
| scaffold02951 | 1    | 2131 | 2131 | 31.94 | C_unshiu_01284 | 2222   | 100    | 2123 | 2.71  | 98.45 |
| scaffold02951 | 2547 | 4674 | 2128 | 31.9  | C_unshiu_01570 | 879    | 2987   | 2109 | 3.56  | 99.06 |
| scaffold02952 | 3565 | 5619 | 2055 | 30.81 | C_unshiu_00169 | 127603 | 129662 | 2060 | 0.56  | 99.47 |
| scaffold02955 | 1    | 4586 | 4586 | 68.94 | C_unshiu_02646 | 16197  | 11612  | 4586 | 21.78 | 100   |
| scaffold02957 | 1985 | 4567 | 2583 | 38.88 | C_unshiu_00630 | 118072 | 120642 | 2571 | 1.6   | 99.07 |
| scaffold02957 | 5632 | 6643 | 1012 | 15.23 | C_unshiu_00630 | 121564 | 122575 | 1012 | 0.63  | 100   |
| scaffold02958 | 756  | 6633 | 5878 | 88.62 | C_unshiu_00020 | 601599 | 595688 | 5912 | 0.75  | 98.71 |
| scaffold02960 | 4038 | 5451 | 1414 | 21.32 | C_unshiu_01816 | 16601  | 18014  | 1414 | 2.95  | 99.36 |
| scaffold02961 | 1    | 1692 | 1692 | 25.54 | C_unshiu_02032 | 13867  | 15572  | 1706 | 4.32  | 98.48 |
| scaffold02961 | 4187 | 6626 | 2440 | 36.82 | C_unshiu_02032 | 18307  | 20752  | 2446 | 6.19  | 99.26 |
| scaffold02964 | 1    | 1215 | 1215 | 18.37 | C_unshiu_02345 | 3383   | 2169   | 1215 | 4.27  | 99.67 |
| scaffold02965 | 2595 | 3895 | 1301 | 19.69 | C_unshiu_00591 | 10283  | 11583  | 1301 | 0.77  | 99.69 |
| scaffold02965 | 3896 | 5831 | 1936 | 29.29 | C_unshiu_01677 | 13332  | 11397  | 1936 | 3.6   | 100   |
| scaffold02966 | 1991 | 5067 | 3077 | 46.56 | C_unshiu_00008 | 408425 | 411505 | 3081 | 0.29  | 99.81 |
| scaffold02967 | 1    | 2988 | 2988 | 45.23 | C_unshiu_00216 | 26481  | 29439  | 2959 | 0.92  | 98.4  |
| scaffold02967 | 5593 | 6606 | 1014 | 15.35 | C_unshiu_00216 | 32410  | 33423  | 1014 | 0.31  | 99.01 |
| scaffold02968 | 1    | 3418 | 3418 | 51.76 | C_unshiu_01870 | 9109   | 12542  | 3434 | 7.5   | 98.43 |
| scaffold02970 | 1505 | 3064 | 1560 | 23.66 | C_unshiu_00669 | 99713  | 98154  | 1560 | 1.02  | 99.94 |
| scaffold02970 | 4138 | 6593 | 2456 | 37.25 | C_unshiu_00669 | 96924  | 94449  | 2476 | 1.62  | 98.35 |
| scaffold02973 | 1940 | 6585 | 4646 | 70.55 | C_unshiu_00899 | 99899  | 95254  | 4646 | 3.97  | 99.98 |
| scaffold02974 | 4545 | 5785 | 1241 | 18.85 | C_unshiu_00352 | 188177 | 189417 | 1241 | 0.52  | 100   |
| scaffold02978 | 192  | 1407 | 1216 | 18.56 | C_unshiu_01708 | 43935  | 45150  | 1216 | 2.33  | 99.75 |

|               |      |      |      |       |                |        |        |      |       |       |
|---------------|------|------|------|-------|----------------|--------|--------|------|-------|-------|
| scaffold02978 | 1875 | 3242 | 1368 | 20.88 | C_unshiu_01708 | 45654  | 47020  | 1367 | 2.62  | 99.78 |
| scaffold02981 | 5357 | 6549 | 1193 | 18.22 | C_unshiu_01483 | 43120  | 44312  | 1193 | 1.86  | 98.75 |
| scaffold02982 | 209  | 5019 | 4811 | 73.42 | C_unshiu_00144 | 82834  | 87656  | 4823 | 1.22  | 99.13 |
| scaffold02983 | 2592 | 6549 | 3958 | 60.44 | C_unshiu_02356 | 1      | 3958   | 3958 | 14.02 | 99.34 |
| scaffold02985 | 3699 | 5527 | 1829 | 28    | C_unshiu_00620 | 32260  | 30432  | 1829 | 1.12  | 100   |
| scaffold02986 | 1    | 5903 | 5903 | 90.43 | C_unshiu_00192 | 153179 | 159075 | 5897 | 1.72  | 98.68 |
| scaffold02986 | 1040 | 6528 | 5489 | 84.08 | C_unshiu_02672 | 8073   | 13587  | 5515 | 26.94 | 98.91 |
| scaffold02988 | 1    | 1435 | 1435 | 22    | C_unshiu_00697 | 130426 | 128975 | 1452 | 1.01  | 98.14 |
| scaffold02989 | 2345 | 6077 | 3733 | 57.32 | C_unshiu_00643 | 96630  | 100363 | 3734 | 2.36  | 99.79 |
| scaffold02990 | 2573 | 5017 | 2445 | 37.58 | C_unshiu_00121 | 67345  | 69792  | 2448 | 0.58  | 98.9  |
| scaffold02991 | 4680 | 5797 | 1118 | 17.23 | C_unshiu_00488 | 187469 | 186352 | 1118 | 0.57  | 99.73 |
| scaffold02994 | 1    | 2076 | 2076 | 31.92 | C_unshiu_01048 | 60181  | 62260  | 2080 | 2.07  | 99.76 |
| scaffold02996 | 742  | 5286 | 4545 | 69.97 | C_unshiu_00565 | 9852   | 14377  | 4526 | 2.59  | 99.08 |
| scaffold02998 | 1    | 1038 | 1038 | 15.99 | C_unshiu_00546 | 137562 | 136525 | 1038 | 0.58  | 100   |
| scaffold02998 | 4891 | 6490 | 1600 | 24.65 | C_unshiu_00546 | 133746 | 132145 | 1602 | 0.89  | 99.69 |
| scaffold02999 | 1    | 1403 | 1403 | 21.62 | C_unshiu_02428 | 4541   | 5944   | 1404 | 5.25  | 98.65 |
| scaffold03001 | 1    | 6486 | 6486 | 100   | C_unshiu_00813 | 119999 | 113514 | 6486 | 5.1   | 100   |
| scaffold03002 | 2647 | 6485 | 3839 | 59.2  | C_unshiu_00034 | 596867 | 600709 | 3843 | 0.55  | 99.14 |
| scaffold03003 | 1041 | 3554 | 2514 | 38.77 | C_unshiu_01649 | 3787   | 1286   | 2502 | 4.53  | 98.57 |
| scaffold03004 | 1    | 1655 | 1655 | 25.55 | C_unshiu_01127 | 71375  | 69721  | 1655 | 1.78  | 99.88 |
| scaffold03008 | 4071 | 6465 | 2395 | 37.05 | C_unshiu_01750 | 28979  | 31364  | 2386 | 4.72  | 99.12 |
| scaffold03010 | 2959 | 6454 | 3496 | 54.17 | C_unshiu_01121 | 51519  | 48015  | 3505 | 3.74  | 98.46 |
| scaffold03011 | 1912 | 3219 | 1308 | 20.3  | C_unshiu_01578 | 11766  | 10459  | 1308 | 2.23  | 99.85 |
| scaffold03015 | 4664 | 6445 | 1782 | 27.65 | C_unshiu_02703 | 890    | 2659   | 1770 | 8.93  | 98.49 |
| scaffold03016 | 4394 | 6441 | 2048 | 31.8  | C_unshiu_00264 | 235090 | 233039 | 2052 | 0.72  | 99.07 |
| scaffold03017 | 1    | 1326 | 1326 | 20.59 | C_unshiu_00054 | 195383 | 194039 | 1345 | 0.23  | 98.29 |
| scaffold03018 | 1    | 5581 | 5581 | 86.73 | C_unshiu_00688 | 108504 | 114088 | 5585 | 3.81  | 98.86 |
| scaffold03021 | 170  | 2319 | 2150 | 33.53 | C_unshiu_00876 | 54705  | 56855  | 2151 | 1.8   | 99.02 |
| scaffold03022 | 1    | 6368 | 6368 | 100   | C_unshiu_01892 | 29457  | 35808  | 6352 | 14.12 | 99.03 |
| scaffold03027 | 3451 | 6290 | 2840 | 44.63 | C_unshiu_00621 | 122404 | 119542 | 2863 | 1.76  | 98.5  |
| scaffold03028 | 1    | 2242 | 2242 | 35.16 | C_unshiu_00036 | 140311 | 138071 | 2241 | 0.33  | 99.24 |
| scaffold03030 | 3565 | 5554 | 1990 | 31.22 | C_unshiu_01918 | 2179   | 4168   | 1990 | 4.52  | 99.35 |
| scaffold03032 | 1739 | 3418 | 1680 | 26.36 | C_unshiu_00846 | 19372  | 21051  | 1680 | 1.37  | 99.7  |
| scaffold03034 | 3203 | 5490 | 2288 | 36.05 | C_unshiu_01298 | 55564  | 57853  | 2290 | 2.95  | 98.13 |
| scaffold03035 | 1    | 4439 | 4439 | 69.72 | C_unshiu_02959 | 9743   | 14179  | 4437 | 31.29 | 99.06 |
| scaffold03036 | 4353 | 5672 | 1320 | 20.8  | C_unshiu_02110 | 7631   | 6314   | 1318 | 3.64  | 98.34 |
| scaffold03043 | 5141 | 6327 | 1187 | 18.76 | C_unshiu_00315 | 252575 | 251393 | 1183 | 0.46  | 98.99 |
| scaffold03045 | 1    | 6318 | 6318 | 100   | C_unshiu_00813 | 113505 | 107188 | 6318 | 4.97  | 100   |
| scaffold03048 | 1    | 5558 | 5558 | 88.04 | C_unshiu_00751 | 101063 | 106565 | 5503 | 4.04  | 98.76 |
| scaffold03048 | 3323 | 6313 | 2991 | 47.38 | C_unshiu_02440 | 26347  | 23354  | 2994 | 11.32 | 99.7  |
| scaffold03051 | 4573 | 6292 | 1720 | 27.34 | C_unshiu_00348 | 196826 | 198553 | 1728 | 0.7   | 98.9  |
| scaffold03052 | 1    | 2186 | 2186 | 34.74 | C_unshiu_00522 | 84652  | 82468  | 2185 | 1.18  | 99.86 |
| scaffold03054 | 1    | 1651 | 1651 | 26.32 | C_unshiu_01335 | 32993  | 31341  | 1653 | 2.2   | 99.33 |
| scaffold03056 | 4241 | 5449 | 1209 | 19.31 | C_unshiu_00125 | 291113 | 289905 | 1209 | 0.29  | 99.92 |
| scaffold03058 | 1    | 6259 | 6259 | 99.98 | C_unshiu_01627 | 30318  | 36596  | 6279 | 11.18 | 98.71 |
| scaffold03065 | 944  | 3266 | 2323 | 37.21 | C_unshiu_01818 | 24622  | 22300  | 2323 | 4.85  | 100   |
| scaffold03065 | 3260 | 4914 | 1655 | 26.51 | C_unshiu_00505 | 185198 | 183528 | 1671 | 0.88  | 98.8  |
| scaffold03065 | 4920 | 6243 | 1324 | 21.21 | C_unshiu_01348 | 38706  | 40029  | 1324 | 1.78  | 100   |
| scaffold03067 | 1    | 1107 | 1107 | 17.73 | C_unshiu_00095 | 153798 | 154907 | 1110 | 0.24  | 98.65 |
| scaffold03067 | 3629 | 4886 | 1258 | 20.15 | C_unshiu_01777 | 49351  | 48092  | 1260 | 2.55  | 99.84 |
| scaffold03070 | 4865 | 6220 | 1356 | 21.8  | C_unshiu_01681 | 50316  | 51670  | 1355 | 2.54  | 99.19 |
| scaffold03071 | 1    | 2681 | 2681 | 42.97 | C_unshiu_00443 | 118898 | 116234 | 2665 | 1.27  | 98.77 |
| scaffold03071 | 5216 | 6239 | 1024 | 16.41 | C_unshiu_01265 | 79138  | 78115  | 1024 | 1.28  | 100   |
| scaffold03073 | 1    | 5869 | 5869 | 94.15 | C_unshiu_02628 | 14317  | 20192  | 5876 | 27.34 | 98.93 |
| scaffold03076 | 1    | 2326 | 2326 | 37.35 | C_unshiu_01196 | 56517  | 58839  | 2323 | 2.7   | 99.87 |
| scaffold03078 | 1    | 1078 | 1078 | 17.37 | C_unshiu_03139 | 2170   | 1094   | 1077 | 16.55 | 98.34 |
| scaffold03082 | 1755 | 3820 | 2066 | 33.39 | C_unshiu_00187 | 322152 | 320084 | 2069 | 0.6   | 99.42 |
| scaffold03085 | 4177 | 6098 | 1922 | 31.03 | C_unshiu_00061 | 416273 | 418204 | 1932 | 0.33  | 98.91 |
| scaffold03086 | 5098 | 6190 | 1093 | 17.66 | C_unshiu_01123 | 84037  | 85128  | 1092 | 1.16  | 98.44 |
| scaffold03088 | 1    | 1272 | 1272 | 20.56 | C_unshiu_00838 | 44314  | 45587  | 1274 | 1.03  | 99.22 |
| scaffold03089 | 1    | 1916 | 1916 | 30.98 | C_unshiu_01105 | 28440  | 30355  | 1916 | 2     | 100   |
| scaffold03089 | 3493 | 6168 | 2676 | 43.27 | C_unshiu_01105 | 31935  | 34612  | 2678 | 2.8   | 99.78 |
| scaffold03090 | 1    | 1709 | 1709 | 27.72 | C_unshiu_01575 | 3826   | 5536   | 1711 | 2.91  | 98.54 |
| scaffold03094 | 1    | 6161 | 6161 | 100   | C_unshiu_00672 | 61761  | 55601  | 6161 | 4.08  | 100   |
| scaffold03096 | 2355 | 6154 | 3800 | 61.75 | C_unshiu_00022 | 115034 | 111235 | 3800 | 0.49  | 100   |
| scaffold03097 | 3042 | 5244 | 2203 | 35.81 | C_unshiu_01357 | 30988  | 33201  | 2214 | 3     | 99.28 |
| scaffold03098 | 2140 | 4658 | 2519 | 40.99 | C_unshiu_00199 | 283255 | 285780 | 2526 | 0.75  | 99.05 |
| scaffold03100 | 250  | 1755 | 1506 | 24.53 | C_unshiu_02340 | 21272  | 19767  | 1506 | 5.27  | 99.87 |
| scaffold03101 | 896  | 3408 | 2513 | 40.95 | C_unshiu_02846 | 16724  | 14211  | 2514 | 15.03 | 99.92 |
| scaffold03101 | 5077 | 6137 | 1061 | 17.29 | C_unshiu_02846 | 11950  | 10890  | 1061 | 6.34  | 99.53 |
| scaffold03103 | 1    | 1129 | 1129 | 18.41 | C_unshiu_00389 | 128434 | 127306 | 1129 | 0.5   | 100   |
| scaffold03105 | 1    | 1756 | 1756 | 28.66 | C_unshiu_02515 | 22429  | 24178  | 1750 | 7.24  | 99.03 |
| scaffold03105 | 4713 | 6126 | 1414 | 23.08 | C_unshiu_00137 | 116108 | 117521 | 1414 | 0.35  | 99.43 |
| scaffold03107 | 3964 | 5369 | 1406 | 23    | C_unshiu_01648 | 43444  | 42046  | 1399 | 2.53  | 98.36 |
| scaffold03108 | 1    | 5482 | 5482 | 89.59 | C_unshiu_00563 | 58596  | 64092  | 5497 | 3.14  | 99.44 |
| scaffold03109 | 1252 | 3618 | 2367 | 38.78 | C_unshiu_02646 | 4597   | 2221   | 2377 | 11.29 | 98.95 |
| scaffold03109 | 3624 | 4640 | 1017 | 16.66 | C_unshiu_01656 | 14993  | 16009  | 1017 | 1.85  | 100   |
| scaffold03109 | 4882 | 6100 | 1219 | 19.97 | C_unshiu_00248 | 285794 | 284580 | 1215 | 0.41  | 99.43 |
| scaffold03110 | 1    | 1338 | 1338 | 21.92 | C_unshiu_00622 | 125790 | 127134 | 1345 | 0.83  | 98.44 |

|               |      |      |      |       |                |        |        |      |       |       |
|---------------|------|------|------|-------|----------------|--------|--------|------|-------|-------|
| scaffold03110 | 2145 | 3714 | 1570 | 25.73 | C_unshiu_03120 | 8418   | 6849   | 1570 | 18.65 | 100   |
| scaffold03110 | 3991 | 6083 | 2093 | 34.29 | C_unshiu_00622 | 129883 | 131975 | 2093 | 1.29  | 99.33 |
| scaffold03113 | 1    | 1145 | 1145 | 18.78 | C_unshiu_02687 | 4259   | 5405   | 1147 | 5.69  | 99.83 |
| scaffold03113 | 2587 | 4067 | 1481 | 24.29 | C_unshiu_02687 | 6799   | 8275   | 1477 | 7.32  | 99.73 |
| scaffold03114 | 1    | 6092 | 6092 | 100   | C_unshiu_01770 | 35505  | 41598  | 6094 | 12.3  | 99.9  |
| scaffold03115 | 3698 | 6091 | 2394 | 39.3  | C_unshiu_00411 | 110724 | 108344 | 2381 | 1.08  | 98.62 |
| scaffold03116 | 1626 | 5201 | 3576 | 58.95 | C_unshiu_00522 | 52301  | 48715  | 3587 | 1.94  | 98.61 |
| scaffold03117 | 3714 | 6086 | 2373 | 38.99 | C_unshiu_01439 | 47752  | 45391  | 2362 | 3.5   | 98.65 |
| scaffold03118 | 1    | 3872 | 3872 | 63.75 | C_unshiu_00350 | 139705 | 143591 | 3887 | 1.61  | 99.51 |
| scaffold03118 | 4003 | 6074 | 2072 | 34.11 | C_unshiu_00350 | 143770 | 145840 | 2071 | 0.86  | 99.76 |
| scaffold03119 | 4403 | 6069 | 1667 | 27.47 | C_unshiu_00670 | 134020 | 132346 | 1675 | 1.1   | 98.93 |
| scaffold03121 | 4934 | 6063 | 1130 | 18.64 | C_unshiu_01057 | 48807  | 47677  | 1131 | 1.14  | 99.91 |
| scaffold03124 | 2224 | 4790 | 2567 | 42.41 | C_unshiu_01013 | 100198 | 97632  | 2567 | 2.45  | 100   |
| scaffold03124 | 4786 | 6053 | 1268 | 20.95 | C_unshiu_01013 | 97508  | 96241  | 1268 | 1.21  | 99.76 |
| scaffold03126 | 1    | 6052 | 6052 | 100   | C_unshiu_01571 | 45150  | 51201  | 6052 | 10.24 | 100   |
| scaffold03127 | 1    | 1368 | 1368 | 22.62 | C_unshiu_00155 | 228254 | 229622 | 1369 | 0.36  | 99.64 |
| scaffold03129 | 58   | 6032 | 5975 | 99.06 | C_unshiu_01926 | 37074  | 43009  | 5936 | 13.54 | 98.48 |
| scaffold03132 | 13   | 5002 | 4990 | 82.57 | C_unshiu_02529 | 9030   | 4065   | 4966 | 20.79 | 99    |
| scaffold03133 | 561  | 6033 | 5473 | 90.72 | C_unshiu_01248 | 19806  | 25281  | 5476 | 6.76  | 99.95 |
| scaffold03134 | 1518 | 5244 | 3727 | 61.77 | C_unshiu_00911 | 96983  | 93257  | 3727 | 3.22  | 99.95 |
| scaffold03135 | 1    | 3106 | 3106 | 51.48 | C_unshiu_02060 | 12959  | 9856   | 3104 | 8.11  | 98.21 |
| scaffold03136 | 703  | 2562 | 1860 | 30.84 | C_unshiu_01969 | 22385  | 24244  | 1860 | 4.45  | 100   |
| scaffold03136 | 3108 | 5051 | 1944 | 32.23 | C_unshiu_00511 | 39991  | 38048  | 1944 | 1.03  | 100   |
| scaffold03138 | 1    | 5051 | 5051 | 83.96 | C_unshiu_02320 | 4914   | 9939   | 5026 | 17.18 | 98.73 |
| scaffold03140 | 1    | 1273 | 1273 | 21.2  | C_unshiu_01233 | 62358  | 61086  | 1273 | 1.55  | 100   |
| scaffold03140 | 2249 | 4327 | 2079 | 34.63 | C_unshiu_01233 | 59904  | 57826  | 2079 | 2.53  | 100   |
| scaffold03141 | 110  | 5994 | 5885 | 98.18 | C_unshiu_00083 | 465597 | 471509 | 5913 | 1.25  | 99.53 |
| scaffold03142 | 1    | 1308 | 1308 | 21.81 | C_unshiu_00096 | 201559 | 200252 | 1308 | 0.28  | 99.54 |
| scaffold03146 | 1    | 4597 | 4597 | 76.77 | C_unshiu_00495 | 34636  | 39232  | 4597 | 2.39  | 99.93 |
| scaffold03148 | 4167 | 5921 | 1755 | 29.37 | C_unshiu_00229 | 48644  | 50416  | 1773 | 0.57  | 98.31 |
| scaffold03149 | 1    | 3092 | 3092 | 51.73 | C_unshiu_01111 | 28287  | 25210  | 3078 | 3.25  | 98.97 |
| scaffold03150 | 1    | 5973 | 5973 | 100   | C_unshiu_00043 | 106963 | 100976 | 5988 | 0.94  | 99.22 |
| scaffold03155 | 870  | 2400 | 1531 | 25.77 | C_unshiu_01811 | 7417   | 8964   | 1548 | 3.22  | 98.64 |
| scaffold03155 | 3978 | 5165 | 1188 | 20    | C_unshiu_01811 | 11043  | 12229  | 1187 | 2.47  | 99.83 |
| scaffold03156 | 1    | 2602 | 2602 | 43.83 | C_unshiu_00132 | 246862 | 244272 | 2591 | 0.63  | 98.62 |
| scaffold03159 | 1    | 1681 | 1681 | 28.34 | C_unshiu_00421 | 208265 | 206602 | 1664 | 0.76  | 98.4  |
| scaffold03159 | 3763 | 5931 | 2169 | 36.57 | C_unshiu_00421 | 203804 | 201622 | 2183 | 1     | 98.81 |
| scaffold03160 | 1    | 2902 | 2902 | 48.99 | C_unshiu_01917 | 28041  | 25154  | 2888 | 6.55  | 98.42 |
| scaffold03164 | 1897 | 3927 | 2031 | 34.35 | C_unshiu_00224 | 284001 | 286034 | 2034 | 0.65  | 98.68 |
| scaffold03165 | 1    | 2249 | 2249 | 37.94 | C_unshiu_00633 | 125650 | 123401 | 2250 | 1.4   | 99.82 |
| scaffold03165 | 4158 | 5205 | 1048 | 17.68 | C_unshiu_00633 | 120620 | 119567 | 1054 | 0.66  | 98.49 |
| scaffold03168 | 1    | 1145 | 1145 | 19.39 | C_unshiu_00300 | 182146 | 183290 | 1145 | 0.43  | 100   |
| scaffold03171 | 1    | 3445 | 3445 | 58.39 | C_unshiu_01130 | 35087  | 31620  | 3468 | 3.74  | 98.48 |
| scaffold03171 | 4257 | 5900 | 1644 | 27.86 | C_unshiu_01130 | 30758  | 29128  | 1631 | 1.76  | 99.15 |
| scaffold03173 | 1    | 5892 | 5892 | 100   | C_unshiu_01415 | 16298  | 10417  | 5882 | 8.42  | 99.42 |
| scaffold03176 | 2065 | 3635 | 1571 | 26.69 | C_unshiu_00023 | 59511  | 61094  | 1584 | 0.2   | 98.61 |
| scaffold03177 | 1    | 1386 | 1386 | 23.57 | C_unshiu_00852 | 20338  | 18953  | 1386 | 1.13  | 99.78 |
| scaffold03178 | 1    | 5879 | 5879 | 100   | C_unshiu_00040 | 414462 | 408584 | 5879 | 0.89  | 100   |
| scaffold03179 | 1    | 4557 | 4557 | 77.53 | C_unshiu_00327 | 43875  | 39319  | 4557 | 1.8   | 99.96 |
| scaffold03180 | 4261 | 5871 | 1611 | 27.44 | C_unshiu_00192 | 208861 | 210471 | 1611 | 0.47  | 100   |
| scaffold03181 | 2722 | 4010 | 1289 | 21.98 | C_unshiu_00798 | 32329  | 33622  | 1294 | 1.01  | 98.76 |
| scaffold03181 | 4624 | 5865 | 1242 | 21.18 | C_unshiu_00798 | 31098  | 32340  | 1243 | 0.97  | 99.6  |
| scaffold03185 | 1419 | 2634 | 1216 | 20.76 | C_unshiu_02485 | 12788  | 11573  | 1216 | 4.85  | 100   |
| scaffold03186 | 1242 | 3110 | 1869 | 31.92 | C_unshiu_00170 | 254501 | 256369 | 1869 | 0.51  | 100   |
| scaffold03186 | 3694 | 4844 | 1151 | 19.66 | C_unshiu_01269 | 76011  | 74862  | 1150 | 1.45  | 98.44 |
| scaffold03186 | 4845 | 5855 | 1011 | 17.27 | C_unshiu_01269 | 74669  | 73659  | 1011 | 1.27  | 99.8  |
| scaffold03190 | 1    | 2319 | 2319 | 39.65 | C_unshiu_00771 | 40178  | 37860  | 2319 | 1.75  | 100   |
| scaffold03191 | 1    | 5862 | 5862 | 100   | C_unshiu_01185 | 35003  | 40867  | 5865 | 6.74  | 99.1  |
| scaffold03192 | 128  | 3418 | 3291 | 56.33 | C_unshiu_00033 | 631201 | 627916 | 3286 | 0.47  | 99.82 |
| scaffold03194 | 1    | 1148 | 1148 | 19.67 | C_unshiu_01961 | 13682  | 14829  | 1148 | 2.71  | 99.22 |
| scaffold03194 | 2539 | 5835 | 3297 | 56.5  | C_unshiu_01961 | 18363  | 21659  | 3297 | 7.79  | 100   |
| scaffold03195 | 1471 | 5832 | 4362 | 74.79 | C_unshiu_01885 | 7838   | 12191  | 4354 | 9.64  | 98.51 |
| scaffold03196 | 1277 | 3538 | 2262 | 38.77 | C_unshiu_03029 | 2953   | 5204   | 2252 | 18.62 | 98.15 |
| scaffold03197 | 1    | 1073 | 1073 | 18.4  | C_unshiu_01480 | 18700  | 17625  | 1076 | 1.67  | 99.54 |
| scaffold03197 | 1540 | 3403 | 1864 | 31.96 | C_unshiu_03037 | 11812  | 9949   | 1864 | 15.7  | 99.95 |
| scaffold03197 | 4080 | 5833 | 1754 | 30.07 | C_unshiu_03037 | 9220   | 7468   | 1753 | 14.77 | 99.49 |
| scaffold03198 | 1    | 1271 | 1271 | 21.79 | C_unshiu_00300 | 60615  | 59344  | 1272 | 0.48  | 98.74 |
| scaffold03199 | 1    | 4883 | 4883 | 83.76 | C_unshiu_00155 | 275078 | 280010 | 4933 | 1.29  | 98.26 |
| scaffold03200 | 4685 | 5830 | 1146 | 19.66 | C_unshiu_00149 | 5876   | 4731   | 1146 | 0.3   | 100   |
| scaffold03201 | 1    | 2085 | 2085 | 35.77 | C_unshiu_00655 | 71856  | 73940  | 2085 | 1.35  | 100   |
| scaffold03201 | 3002 | 5829 | 2828 | 48.52 | C_unshiu_00655 | 75129  | 77956  | 2828 | 1.83  | 99.79 |
| scaffold03202 | 2184 | 5769 | 3586 | 61.53 | C_unshiu_00318 | 27840  | 24255  | 3586 | 1.4   | 100   |
| scaffold03202 | 4423 | 5828 | 1406 | 24.12 | C_unshiu_00318 | 20528  | 21933  | 1406 | 0.55  | 100   |
| scaffold03205 | 2041 | 3441 | 1401 | 24.07 | C_unshiu_00369 | 131019 | 132421 | 1403 | 0.6   | 99.86 |
| scaffold03205 | 4286 | 5432 | 1147 | 19.71 | C_unshiu_00369 | 134529 | 135677 | 1149 | 0.49  | 98.87 |
| scaffold03207 | 1    | 1164 | 1164 | 20.01 | C_unshiu_00658 | 87228  | 86067  | 1162 | 0.75  | 98.63 |
| scaffold03207 | 1493 | 3143 | 1651 | 28.38 | C_unshiu_00097 | 443062 | 441412 | 1651 | 0.36  | 100   |
| scaffold03208 | 1    | 1448 | 1448 | 24.89 | C_unshiu_00413 | 77607  | 76156  | 1452 | 0.66  | 98.14 |
| scaffold03210 | 1    | 5655 | 5655 | 97.11 | C_unshiu_03040 | 6150   | 11811  | 5662 | 47.94 | 98.24 |

|               |      |      |      |       |                |        |        |      |       |       |
|---------------|------|------|------|-------|----------------|--------|--------|------|-------|-------|
| scaffold03212 | 2945 | 4424 | 1480 | 25.51 | C_unshiu_00256 | 26455  | 27933  | 1479 | 0.51  | 98.99 |
| scaffold03217 | 3660 | 4661 | 1002 | 17.31 | C_unshiu_00506 | 42326  | 43327  | 1002 | 0.53  | 99.2  |
| scaffold03218 | 2254 | 5776 | 3523 | 60.99 | C_unshiu_00484 | 28626  | 32163  | 3538 | 1.8   | 98.76 |
| scaffold03221 | 2153 | 5726 | 3574 | 62.07 | C_unshiu_00668 | 80105  | 83671  | 3567 | 2.34  | 98.16 |
| scaffold03223 | 1874 | 2903 | 1030 | 17.86 | C_unshiu_00788 | 64661  | 65690  | 1030 | 0.79  | 100   |
| scaffold03228 | 1    | 1455 | 1455 | 25.32 | C_unshiu_01564 | 4046   | 5504   | 1459 | 2.45  | 99.25 |
| scaffold03230 | 922  | 2037 | 1116 | 19.42 | C_unshiu_00344 | 154189 | 153074 | 1116 | 0.45  | 99.91 |
| scaffold03232 | 806  | 1819 | 1014 | 17.68 | C_unshiu_00197 | 108785 | 109798 | 1014 | 0.3   | 99.41 |
| scaffold03232 | 3488 | 4630 | 1143 | 19.93 | C_unshiu_00197 | 111597 | 112738 | 1142 | 0.34  | 99.65 |
| scaffold03233 | 708  | 2227 | 1520 | 26.5  | C_unshiu_00383 | 206972 | 208495 | 1524 | 0.67  | 98.75 |
| scaffold03234 | 1    | 5722 | 5722 | 100   | C_unshiu_00858 | 11679  | 5959   | 5721 | 4.7   | 99.65 |
| scaffold03235 | 2    | 2199 | 2198 | 38.39 | C_unshiu_00072 | 451442 | 453638 | 2197 | 0.42  | 99.64 |
| scaffold03237 | 3354 | 5694 | 2341 | 41.11 | C_unshiu_03068 | 10662  | 8331   | 2332 | 21.87 | 98.47 |
| scaffold03238 | 3201 | 5711 | 2511 | 43.97 | C_unshiu_00273 | 27647  | 25118  | 2530 | 0.91  | 98.5  |
| scaffold03240 | 1179 | 5697 | 4519 | 79.32 | C_unshiu_01598 | 51138  | 46619  | 4520 | 7.85  | 98.74 |
| scaffold03241 | 952  | 3287 | 2336 | 40.98 | C_unshiu_00787 | 87153  | 89488  | 2336 | 1.79  | 100   |
| scaffold03242 | 4576 | 5696 | 1121 | 19.67 | C_unshiu_00515 | 85669  | 86787  | 1119 | 0.6   | 99.11 |
| scaffold03245 | 3360 | 4425 | 1066 | 18.76 | C_unshiu_00353 | 197747 | 198810 | 1064 | 0.45  | 99.53 |
| scaffold03246 | 653  | 5062 | 4410 | 77.46 | C_unshiu_00300 | 119406 | 114996 | 4411 | 1.66  | 98.67 |
| scaffold03247 | 1153 | 5690 | 4538 | 79.75 | C_unshiu_00858 | 41349  | 36822  | 4528 | 3.72  | 99.54 |
| scaffold03250 | 192  | 5682 | 5491 | 96.64 | C_unshiu_01228 | 5173   | 10661  | 5489 | 6.65  | 99.91 |
| scaffold03253 | 636  | 2341 | 1706 | 30.06 | C_unshiu_00500 | 32903  | 31198  | 1706 | 0.89  | 99.53 |
| scaffold03254 | 1    | 3876 | 3876 | 68.36 | C_unshiu_00426 | 47004  | 43139  | 3866 | 1.78  | 99.28 |
| scaffold03254 | 1339 | 5178 | 3840 | 67.72 | C_unshiu_00204 | 54212  | 50366  | 3847 | 1.16  | 99.09 |
| scaffold03255 | 3354 | 4910 | 1557 | 27.5  | C_unshiu_00025 | 206098 | 207664 | 1567 | 0.21  | 98.66 |
| scaffold03258 | 4372 | 5659 | 1288 | 22.76 | C_unshiu_02778 | 6540   | 7845   | 1306 | 7.11  | 98.17 |
| scaffold03260 | 1    | 2608 | 2608 | 46.22 | C_unshiu_00050 | 238477 | 235885 | 2593 | 0.43  | 99.04 |
| scaffold03261 | 2508 | 4422 | 1915 | 33.94 | C_unshiu_02750 | 16021  | 14089  | 1933 | 10.14 | 98.55 |
| scaffold03261 | 4502 | 5642 | 1141 | 20.22 | C_unshiu_02750 | 13986  | 12846  | 1141 | 5.99  | 100   |
| scaffold03262 | 1    | 1832 | 1832 | 32.57 | C_unshiu_02605 | 1824   | 1      | 1824 | 8.31  | 98.69 |
| scaffold03264 | 1610 | 4056 | 2447 | 43.61 | C_unshiu_00898 | 46399  | 43947  | 2453 | 2.09  | 98.5  |
| scaffold03265 | 1    | 1991 | 1991 | 35.41 | C_unshiu_00274 | 273152 | 271160 | 1993 | 0.71  | 99.6  |
| scaffold03267 | 1    | 1509 | 1509 | 26.88 | C_unshiu_00537 | 159926 | 161423 | 1498 | 0.82  | 99.14 |
| scaffold03267 | 3673 | 5614 | 1942 | 34.59 | C_unshiu_00537 | 163541 | 165484 | 1944 | 1.07  | 99.9  |
| scaffold03268 | 1    | 1990 | 1990 | 35.48 | C_unshiu_00192 | 34948  | 32945  | 2004 | 0.58  | 99.25 |
| scaffold03269 | 1753 | 4913 | 3161 | 56.36 | C_unshiu_00457 | 143896 | 147087 | 3192 | 1.55  | 98.56 |
| scaffold03271 | 607  | 2196 | 1590 | 28.52 | C_unshiu_00186 | 336668 | 338256 | 1589 | 0.46  | 98.93 |
| scaffold03272 | 1    | 5589 | 5589 | 100   | C_unshiu_02532 | 11610  | 6020   | 5591 | 23.47 | 99.93 |
| scaffold03273 | 1    | 5568 | 5568 | 100   | C_unshiu_00562 | 9795   | 4189   | 5607 | 3.2   | 98.18 |
| scaffold03274 | 4081 | 5581 | 1501 | 26.89 | C_unshiu_01004 | 93442  | 91941  | 1502 | 1.43  | 98.47 |
| scaffold03277 | 1469 | 2877 | 1409 | 25.29 | C_unshiu_01152 | 80306  | 78897  | 1410 | 1.55  | 99.79 |
| scaffold03279 | 1446 | 2587 | 1142 | 20.55 | C_unshiu_00188 | 102468 | 101329 | 1140 | 0.33  | 98.51 |
| scaffold03280 | 1    | 1474 | 1474 | 26.54 | C_unshiu_00030 | 31494  | 32967  | 1474 | 0.21  | 99.59 |
| scaffold03280 | 2741 | 5551 | 2811 | 50.62 | C_unshiu_00030 | 33178  | 35986  | 2809 | 0.4   | 99.04 |
| scaffold03283 | 448  | 1964 | 1517 | 27.43 | C_unshiu_01721 | 51799  | 50290  | 1510 | 2.92  | 99.14 |
| scaffold03285 | 321  | 2160 | 1840 | 33.19 | C_unshiu_00188 | 308174 | 306335 | 1840 | 0.53  | 99.29 |
| scaffold03285 | 4259 | 5538 | 1280 | 23.09 | C_unshiu_00188 | 322539 | 321271 | 1269 | 0.37  | 98.29 |
| scaffold03286 | 1    | 2786 | 2786 | 50.42 | C_unshiu_00222 | 289820 | 292603 | 2784 | 0.89  | 99.93 |
| scaffold03286 | 2781 | 5526 | 2746 | 49.69 | C_unshiu_00222 | 294146 | 296891 | 2746 | 0.87  | 99.96 |
| scaffold03289 | 1541 | 2869 | 1329 | 24    | C_unshiu_00187 | 14018  | 15347  | 1330 | 0.38  | 99.25 |
| scaffold03290 | 15   | 2659 | 2645 | 47.76 | C_unshiu_00361 | 213781 | 211132 | 2650 | 1.12  | 99.06 |
| scaffold03291 | 1    | 5539 | 5539 | 100   | C_unshiu_01056 | 75732  | 70194  | 5539 | 5.56  | 99.57 |
| scaffold03292 | 2082 | 4674 | 2593 | 46.82 | C_unshiu_00273 | 253269 | 255856 | 2588 | 0.93  | 99.46 |
| scaffold03294 | 5    | 4735 | 4731 | 85.52 | C_unshiu_00590 | 148398 | 143632 | 4767 | 2.81  | 98.89 |
| scaffold03295 | 1    | 5531 | 5531 | 100   | C_unshiu_00162 | 78981  | 73451  | 5531 | 1.49  | 100   |
| scaffold03296 | 1    | 5499 | 5499 | 99.58 | C_unshiu_01322 | 68547  | 74007  | 5461 | 7.25  | 98.49 |
| scaffold03297 | 819  | 1976 | 1158 | 20.95 | C_unshiu_00622 | 11278  | 12433  | 1156 | 0.71  | 98.02 |
| scaffold03299 | 1    | 1245 | 1245 | 22.54 | C_unshiu_00137 | 185654 | 184410 | 1245 | 0.31  | 98.71 |
| scaffold03299 | 3209 | 4422 | 1214 | 21.98 | C_unshiu_01443 | 55162  | 56379  | 1218 | 1.81  | 99.51 |
| scaffold03299 | 4428 | 5523 | 1096 | 19.84 | C_unshiu_00137 | 181271 | 180176 | 1096 | 0.27  | 99.64 |
| scaffold03302 | 1    | 3492 | 3492 | 63.3  | C_unshiu_00621 | 103838 | 107334 | 3497 | 2.15  | 98.97 |
| scaffold03303 | 1936 | 3225 | 1290 | 23.39 | C_unshiu_00775 | 109529 | 110818 | 1290 | 0.98  | 99.46 |
| scaffold03303 | 3306 | 5516 | 2211 | 40.08 | C_unshiu_00775 | 110916 | 113126 | 2211 | 1.67  | 100   |
| scaffold03304 | 1    | 3080 | 3080 | 55.94 | C_unshiu_00491 | 173955 | 170884 | 3072 | 1.57  | 98.32 |
| scaffold03304 | 2095 | 4058 | 1964 | 35.67 | C_unshiu_00256 | 182450 | 184408 | 1959 | 0.67  | 98.63 |
| scaffold03309 | 1    | 2094 | 2094 | 38.09 | C_unshiu_00114 | 192098 | 190005 | 2094 | 0.48  | 100   |
| scaffold03313 | 1    | 1616 | 1616 | 29.51 | C_unshiu_00467 | 91616  | 93231  | 1616 | 0.8   | 98.89 |
| scaffold03313 | 2628 | 3804 | 1177 | 21.49 | C_unshiu_00467 | 91047  | 92222  | 1176 | 0.58  | 99.24 |
| scaffold03316 | 4140 | 5454 | 1315 | 24.11 | C_unshiu_02293 | 9323   | 10637  | 1315 | 4.38  | 100   |
| scaffold03317 | 1    | 1190 | 1190 | 21.85 | C_unshiu_00454 | 112157 | 110968 | 1190 | 0.58  | 100   |
| scaffold03318 | 1    | 2819 | 2819 | 51.8  | C_unshiu_02800 | 353    | 3172   | 2820 | 15.76 | 99.68 |
| scaffold03319 | 1    | 5442 | 5442 | 100   | C_unshiu_02344 | 21444  | 26856  | 5413 | 19.02 | 98.99 |
| scaffold03320 | 1    | 2516 | 2516 | 46.28 | C_unshiu_01576 | 17896  | 15396  | 2501 | 4.25  | 99.13 |
| scaffold03320 | 2555 | 4865 | 2311 | 42.51 | C_unshiu_01701 | 5907   | 8217   | 2311 | 4.4   | 100   |
| scaffold03321 | 3522 | 5423 | 1902 | 35.07 | C_unshiu_01325 | 67488  | 69396  | 1909 | 2.54  | 98.33 |
| scaffold03322 | 1    | 1015 | 1015 | 18.68 | C_unshiu_00322 | 136943 | 137950 | 1008 | 0.39  | 98.72 |
| scaffold03323 | 544  | 5430 | 4887 | 90    | C_unshiu_00300 | 150452 | 155327 | 4876 | 1.83  | 98.31 |
| scaffold03325 | 1    | 2056 | 2056 | 37.85 | C_unshiu_01067 | 44065  | 42011  | 2055 | 2.08  | 99.81 |
| scaffold03326 | 2105 | 3656 | 1552 | 28.63 | C_unshiu_00047 | 23942  | 22391  | 1552 | 0.25  | 99.87 |

|               |      |      |      |       |                |        |        |      |       |       |
|---------------|------|------|------|-------|----------------|--------|--------|------|-------|-------|
| scaffold03327 | 3479 | 5403 | 1925 | 35.63 | C_unshiu_00907 | 97381  | 95457  | 1925 | 1.65  | 99.53 |
| scaffold03328 | 2741 | 5419 | 2679 | 49.44 | C_unshiu_00809 | 54988  | 52313  | 2676 | 2.1   | 98.81 |
| scaffold03330 | 177  | 1445 | 1269 | 23.49 | C_unshiu_02304 | 22083  | 20815  | 1269 | 4.27  | 99.45 |
| scaffold03330 | 4004 | 5403 | 1400 | 25.91 | C_unshiu_02304 | 18014  | 16614  | 1401 | 4.71  | 99.22 |
| scaffold03331 | 1    | 1059 | 1059 | 19.56 | C_unshiu_03012 | 2418   | 3476   | 1059 | 8.44  | 100   |
| scaffold03331 | 3407 | 5414 | 2008 | 37.09 | C_unshiu_02155 | 7695   | 9702   | 2008 | 5.78  | 99.75 |
| scaffold03336 | 1484 | 5409 | 3926 | 72.58 | C_unshiu_00068 | 184859 | 188785 | 3927 | 0.74  | 98.63 |
| scaffold03338 | 1    | 3206 | 3206 | 59.34 | C_unshiu_00490 | 190884 | 194095 | 3212 | 1.64  | 99.63 |
| scaffold03339 | 5    | 2319 | 2315 | 42.85 | C_unshiu_00831 | 92897  | 95212  | 2316 | 1.85  | 98.49 |
| scaffold03339 | 3442 | 5096 | 1655 | 30.64 | C_unshiu_00831 | 96665  | 98318  | 1654 | 1.32  | 99.88 |
| scaffold03340 | 1119 | 5402 | 4284 | 79.3  | C_unshiu_00791 | 57097  | 52806  | 4292 | 3.31  | 99.42 |
| scaffold03341 | 1    | 2642 | 2642 | 49.05 | C_unshiu_00918 | 19492  | 16848  | 2645 | 2.3   | 98.9  |
| scaffold03342 | 1    | 1613 | 1613 | 29.87 | C_unshiu_02503 | 14663  | 13044  | 1620 | 6.59  | 98.83 |
| scaffold03342 | 1614 | 5400 | 3787 | 70.13 | C_unshiu_02503 | 13082  | 9285   | 3798 | 15.45 | 99.19 |
| scaffold03343 | 3416 | 5399 | 1984 | 36.75 | C_unshiu_00085 | 345785 | 347762 | 1978 | 0.42  | 99.6  |
| scaffold03344 | 88   | 1684 | 1597 | 29.63 | C_unshiu_00382 | 12789  | 14376  | 1588 | 0.69  | 98.31 |
| scaffold03348 | 1    | 2399 | 2399 | 44.57 | C_unshiu_00208 | 322538 | 324936 | 2399 | 0.73  | 99.46 |
| scaffold03351 | 4096 | 5347 | 1252 | 23.41 | C_unshiu_01609 | 15656  | 14405  | 1252 | 2.19  | 100   |
| scaffold03353 | 1    | 1292 | 1292 | 24.06 | C_unshiu_01481 | 20946  | 22237  | 1292 | 2.01  | 99.69 |
| scaffold03353 | 1138 | 2224 | 1087 | 20.24 | C_unshiu_01481 | 22234  | 23319  | 1086 | 1.69  | 98.25 |
| scaffold03353 | 2575 | 4620 | 2046 | 38.1  | C_unshiu_00528 | 4450   | 6495   | 2046 | 1.11  | 99.9  |
| scaffold03355 | 1    | 1530 | 1530 | 28.53 | C_unshiu_00627 | 68872  | 70407  | 1536 | 0.95  | 98.44 |
| scaffold03356 | 1    | 1623 | 1623 | 30.26 | C_unshiu_01084 | 34662  | 36281  | 1620 | 1.66  | 99.75 |
| scaffold03356 | 4041 | 5363 | 1323 | 24.67 | C_unshiu_01084 | 38791  | 40113  | 1323 | 1.36  | 99.32 |
| scaffold03362 | 3535 | 5355 | 1821 | 34.01 | C_unshiu_00176 | 23361  | 25196  | 1836 | 0.51  | 98.69 |
| scaffold03363 | 1    | 2679 | 2679 | 50.07 | C_unshiu_02189 | 30929  | 33605  | 2677 | 7.97  | 99.18 |
| scaffold03365 | 1428 | 3285 | 1858 | 34.7  | C_unshiu_00968 | 80650  | 82517  | 1868 | 1.7   | 98.98 |
| scaffold03365 | 4075 | 5354 | 1280 | 23.91 | C_unshiu_00968 | 87292  | 88572  | 1281 | 1.17  | 98.52 |
| scaffold03368 | 1    | 2180 | 2180 | 40.8  | C_unshiu_00696 | 57654  | 55461  | 2194 | 1.52  | 99.32 |
| scaffold03368 | 3330 | 5343 | 2014 | 37.69 | C_unshiu_02210 | 16381  | 18385  | 2005 | 6.1   | 98.22 |
| scaffold03369 | 1    | 1454 | 1454 | 27.23 | C_unshiu_00519 | 61014  | 62467  | 1454 | 0.78  | 100   |
| scaffold03374 | 1    | 1154 | 1154 | 21.65 | C_unshiu_01776 | 34778  | 33625  | 1154 | 2.33  | 100   |
| scaffold03374 | 3866 | 5331 | 1466 | 27.5  | C_unshiu_01776 | 32360  | 30895  | 1466 | 2.97  | 99.59 |
| scaffold03376 | 37   | 1871 | 1835 | 34.52 | C_unshiu_00079 | 209226 | 211054 | 1829 | 0.37  | 98.32 |
| scaffold03377 | 1    | 3859 | 3859 | 72.48 | C_unshiu_00756 | 18810  | 14952  | 3859 | 2.85  | 100   |
| scaffold03382 | 499  | 3039 | 2541 | 47.96 | C_unshiu_00192 | 181755 | 179216 | 2540 | 0.74  | 99.57 |
| scaffold03384 | 1956 | 5296 | 3341 | 63.09 | C_unshiu_01561 | 36152  | 39494  | 3343 | 5.59  | 99.67 |
| scaffold03387 | 3157 | 4650 | 1494 | 28.25 | C_unshiu_01855 | 41860  | 43351  | 1492 | 3.22  | 99.8  |
| scaffold03398 | 2418 | 5272 | 2855 | 54.15 | C_unshiu_00493 | 6220   | 9073   | 2854 | 1.47  | 99.61 |
| scaffold03400 | 3600 | 4680 | 1081 | 20.52 | C_unshiu_00165 | 238409 | 237333 | 1077 | 0.29  | 98.25 |
| scaffold03401 | 3775 | 5065 | 1291 | 24.51 | C_unshiu_00037 | 524793 | 526082 | 1290 | 0.19  | 98.22 |
| scaffold03403 | 3294 | 5264 | 1971 | 37.44 | C_unshiu_02066 | 17028  | 18998  | 1971 | 5.17  | 100   |
| scaffold03405 | 1    | 1711 | 1711 | 32.47 | C_unshiu_00179 | 249116 | 250832 | 1717 | 0.48  | 99.18 |
| scaffold03406 | 1    | 5261 | 5261 | 100   | C_unshiu_00675 | 10209  | 15468  | 5260 | 3.51  | 99.75 |
| scaffold03408 | 38   | 5255 | 5218 | 99.3  | C_unshiu_01185 | 27291  | 22061  | 5231 | 6.01  | 98.97 |
| scaffold03410 | 2741 | 4364 | 1624 | 30.89 | C_unshiu_02219 | 21757  | 20134  | 1624 | 4.97  | 99.82 |
| scaffold03412 | 1    | 2588 | 2588 | 49.27 | C_unshiu_00139 | 159147 | 161732 | 2586 | 0.64  | 99.46 |
| scaffold03412 | 3879 | 5253 | 1375 | 26.18 | C_unshiu_00139 | 163132 | 164506 | 1375 | 0.34  | 100   |
| scaffold03413 | 1    | 2413 | 2413 | 45.94 | C_unshiu_00629 | 138487 | 136072 | 2416 | 1.5   | 98.88 |
| scaffold03413 | 4176 | 5253 | 1078 | 20.52 | C_unshiu_00629 | 134300 | 133223 | 1078 | 0.67  | 99.91 |
| scaffold03420 | 1    | 1956 | 1956 | 37.3  | C_unshiu_00378 | 197191 | 199144 | 1954 | 0.85  | 99.8  |
| scaffold03428 | 1511 | 2763 | 1253 | 23.93 | C_unshiu_00500 | 156710 | 155461 | 1250 | 0.65  | 98.33 |
| scaffold03434 | 3377 | 5223 | 1847 | 35.36 | C_unshiu_00102 | 14864  | 16724  | 1861 | 0.41  | 98.28 |
| scaffold03442 | 1    | 5210 | 5210 | 100   | C_unshiu_00542 | 124454 | 129664 | 5211 | 2.9   | 98.46 |
| scaffold03445 | 2781 | 5183 | 2403 | 46.36 | C_unshiu_01324 | 49499  | 47110  | 2390 | 3.17  | 98.96 |
| scaffold03446 | 1    | 1991 | 1991 | 38.25 | C_unshiu_00627 | 42262  | 44254  | 1993 | 1.24  | 99.55 |
| scaffold03447 | 1    | 1670 | 1670 | 32.09 | C_unshiu_00712 | 58371  | 56702  | 1670 | 1.17  | 100   |
| scaffold03447 | 4040 | 5204 | 1165 | 22.39 | C_unshiu_00712 | 54045  | 52881  | 1165 | 0.82  | 99.83 |
| scaffold03449 | 3529 | 5189 | 1661 | 32.01 | C_unshiu_02357 | 7048   | 8706   | 1659 | 5.88  | 98.98 |
| scaffold03450 | 8    | 2092 | 2085 | 40.13 | C_unshiu_01116 | 41373  | 39291  | 2083 | 2.21  | 98.75 |
| scaffold03451 | 1623 | 5194 | 3572 | 68.77 | C_unshiu_01571 | 14574  | 11015  | 3560 | 6.03  | 98.35 |
| scaffold03455 | 3031 | 5189 | 2159 | 41.61 | C_unshiu_02075 | 4332   | 2178   | 2155 | 5.74  | 99.44 |
| scaffold03456 | 1    | 5183 | 5183 | 100   | C_unshiu_00078 | 39854  | 45037  | 5184 | 1.04  | 99.34 |
| scaffold03457 | 2186 | 4490 | 2305 | 44.77 | C_unshiu_00331 | 32035  | 34340  | 2306 | 0.91  | 99.13 |
| scaffold03459 | 1    | 2251 | 2251 | 43.44 | C_unshiu_00144 | 376400 | 374150 | 2251 | 0.57  | 100   |
| scaffold03459 | 3575 | 5182 | 1608 | 31.03 | C_unshiu_00476 | 82301  | 80694  | 1608 | 0.8   | 100   |
| scaffold03460 | 2613 | 4196 | 1584 | 30.58 | C_unshiu_00063 | 87280  | 88851  | 1572 | 0.28  | 99.12 |
| scaffold03463 | 3978 | 5123 | 1146 | 22.37 | C_unshiu_00411 | 16785  | 15630  | 1156 | 0.52  | 98.01 |
| scaffold03464 | 3788 | 5170 | 1383 | 26.75 | C_unshiu_00417 | 19210  | 17828  | 1383 | 0.63  | 100   |
| scaffold03466 | 1    | 5168 | 5168 | 100   | C_unshiu_01386 | 69595  | 64468  | 5128 | 7.2   | 99.05 |
| scaffold03468 | 1    | 5166 | 5166 | 100   | C_unshiu_02934 | 2249   | 7495   | 5247 | 35.26 | 98.4  |
| scaffold03469 | 1476 | 4045 | 2570 | 49.79 | C_unshiu_01211 | 50943  | 53495  | 2553 | 3.03  | 98.25 |
| scaffold03469 | 3017 | 5162 | 2146 | 41.57 | C_unshiu_00957 | 12115  | 14260  | 2146 | 1.94  | 99.67 |
| scaffold03472 | 1    | 5156 | 5156 | 100   | C_unshiu_01185 | 9867   | 4790   | 5078 | 5.84  | 98.2  |
| scaffold03473 | 630  | 2848 | 2219 | 43.01 | C_unshiu_00633 | 26857  | 29074  | 2218 | 1.38  | 98.56 |
| scaffold03476 | 1    | 1186 | 1186 | 23.02 | C_unshiu_00489 | 109155 | 110347 | 1193 | 0.61  | 98.74 |
| scaffold03477 | 3779 | 5151 | 1373 | 26.66 | C_unshiu_00554 | 167478 | 168850 | 1373 | 0.78  | 99.93 |
| scaffold03479 | 3594 | 5149 | 1556 | 30.22 | C_unshiu_02632 | 2866   | 4421   | 1556 | 7.29  | 100   |
| scaffold03480 | 1831 | 4028 | 2198 | 42.7  | C_unshiu_00980 | 14912  | 17109  | 2198 | 2.02  | 100   |

|               |      |      |      |       |                |        |        |      |       |       |
|---------------|------|------|------|-------|----------------|--------|--------|------|-------|-------|
| scaffold03481 | 1632 | 4822 | 3191 | 62    | C_unshiu_02342 | 14393  | 17583  | 3191 | 11.19 | 99.72 |
| scaffold03482 | 3    | 1510 | 1508 | 29.3  | C_unshiu_00103 | 164461 | 165970 | 1510 | 0.33  | 99.67 |
| scaffold03482 | 4085 | 5146 | 1062 | 20.64 | C_unshiu_00103 | 168595 | 169663 | 1069 | 0.24  | 98.5  |
| scaffold03484 | 526  | 3492 | 2967 | 57.69 | C_unshiu_00905 | 70449  | 67485  | 2965 | 2.55  | 98.76 |
| scaffold03488 | 1    | 1353 | 1353 | 26.33 | C_unshiu_00107 | 7895   | 6543   | 1353 | 0.3   | 99.7  |
| scaffold03488 | 3463 | 5138 | 1676 | 32.62 | C_unshiu_00107 | 4120   | 2445   | 1676 | 0.37  | 100   |
| scaffold03489 | 2673 | 4231 | 1559 | 30.37 | C_unshiu_02128 | 20586  | 19031  | 1556 | 4.36  | 99.3  |
| scaffold03490 | 1    | 1610 | 1610 | 31.41 | C_unshiu_00534 | 149380 | 150993 | 1614 | 0.88  | 98.88 |
| scaffold03490 | 4086 | 5126 | 1041 | 20.31 | C_unshiu_00534 | 153612 | 154652 | 1041 | 0.57  | 98.27 |
| scaffold03491 | 1    | 1351 | 1351 | 26.38 | C_unshiu_00219 | 44867  | 46217  | 1351 | 0.43  | 99.26 |
| scaffold03491 | 2565 | 4545 | 1981 | 38.68 | C_unshiu_02075 | 13155  | 15154  | 2000 | 5.32  | 98.6  |
| scaffold03493 | 1153 | 2582 | 1430 | 27.97 | C_unshiu_01140 | 58016  | 59439  | 1424 | 1.55  | 98.6  |
| scaffold03493 | 3398 | 4474 | 1077 | 21.06 | C_unshiu_00632 | 144004 | 142929 | 1076 | 0.67  | 98.7  |
| scaffold03495 | 1    | 3448 | 3448 | 67.45 | C_unshiu_00007 | 513291 | 509844 | 3448 | 0.31  | 98.84 |
| scaffold03496 | 1    | 1112 | 1112 | 21.77 | C_unshiu_00114 | 797    | 1908   | 1112 | 0.26  | 99.64 |
| scaffold03511 | 3715 | 5076 | 1362 | 26.83 | C_unshiu_00056 | 435655 | 437017 | 1363 | 0.23  | 98.1  |
| scaffold03514 | 2315 | 4286 | 1972 | 38.93 | C_unshiu_00212 | 168901 | 170871 | 1971 | 0.6   | 98.48 |
| scaffold03517 | 3844 | 5068 | 1225 | 24.16 | C_unshiu_01816 | 18471  | 19693  | 1223 | 2.55  | 99.59 |
| scaffold03519 | 1    | 1258 | 1258 | 24.84 | C_unshiu_00779 | 53971  | 55229  | 1259 | 0.96  | 99.92 |
| scaffold03521 | 1615 | 2641 | 1027 | 20.3  | C_unshiu_01579 | 58696  | 57671  | 1026 | 1.75  | 99.13 |
| scaffold03525 | 239  | 3339 | 3101 | 61.45 | C_unshiu_00549 | 63078  | 66178  | 3101 | 1.73  | 99.48 |
| scaffold03525 | 3752 | 5046 | 1295 | 25.66 | C_unshiu_00549 | 67616  | 68911  | 1296 | 0.73  | 98.84 |
| scaffold03530 | 2890 | 5040 | 2151 | 42.68 | C_unshiu_00391 | 16355  | 14204  | 2152 | 0.96  | 99.67 |
| scaffold03532 | 2554 | 4163 | 1610 | 31.98 | C_unshiu_00383 | 213756 | 212147 | 1610 | 0.71  | 100   |
| scaffold03534 | 1    | 1072 | 1072 | 21.3  | C_unshiu_00810 | 116426 | 115353 | 1074 | 0.84  | 99.81 |
| scaffold03534 | 1073 | 3262 | 2190 | 43.51 | C_unshiu_00140 | 63673  | 65862  | 2190 | 0.54  | 99.91 |
| scaffold03535 | 2747 | 5030 | 2284 | 45.41 | C_unshiu_00003 | 320431 | 318148 | 2284 | 0.17  | 98.38 |
| scaffold03537 | 1    | 1462 | 1462 | 29.09 | C_unshiu_00409 | 169755 | 171201 | 1447 | 0.65  | 98.84 |
| scaffold03538 | 1    | 1372 | 1372 | 27.29 | C_unshiu_00399 | 79055  | 80420  | 1366 | 0.61  | 98.83 |
| scaffold03543 | 2174 | 5015 | 2842 | 56.67 | C_unshiu_00148 | 326201 | 329053 | 2853 | 0.74  | 98.11 |
| scaffold03546 | 3748 | 5011 | 1264 | 25.22 | C_unshiu_01130 | 4351   | 3088   | 1264 | 1.36  | 100   |
| scaffold03549 | 3507 | 5007 | 1501 | 29.98 | C_unshiu_02469 | 13026  | 11524  | 1503 | 5.89  | 99.53 |
| scaffold03550 | 3354 | 4989 | 1636 | 32.79 | C_unshiu_00378 | 208558 | 206917 | 1642 | 0.71  | 99.63 |
| scaffold03551 | 1    | 3104 | 3104 | 62.04 | C_unshiu_00251 | 289458 | 292561 | 3104 | 1.05  | 99.87 |
| scaffold03552 | 3017 | 5001 | 1985 | 39.69 | C_unshiu_00874 | 16007  | 14023  | 1985 | 1.65  | 98.89 |
| scaffold03553 | 1    | 2016 | 2016 | 40.34 | C_unshiu_01241 | 79677  | 81704  | 2028 | 2.48  | 99.41 |
| scaffold03554 | 1    | 4997 | 4997 | 100   | C_unshiu_02034 | 6889   | 11911  | 5023 | 12.75 | 98.73 |
| scaffold03556 | 1    | 1573 | 1573 | 31.49 | C_unshiu_01839 | 18092  | 19661  | 1570 | 3.34  | 98.16 |
| scaffold03556 | 3978 | 4996 | 1019 | 20.4  | C_unshiu_01839 | 22096  | 23114  | 1019 | 2.17  | 99.9  |
| scaffold03558 | 1    | 4990 | 4990 | 100   | C_unshiu_00008 | 493045 | 488039 | 5007 | 0.46  | 99.38 |
| scaffold03562 | 1    | 1716 | 1716 | 34.46 | C_unshiu_01040 | 78410  | 76695  | 1716 | 1.68  | 99.3  |
| scaffold03568 | 2014 | 3101 | 1088 | 21.97 | C_unshiu_00149 | 234172 | 233084 | 1089 | 0.28  | 98.17 |
| scaffold03569 | 226  | 1737 | 1512 | 30.45 | C_unshiu_00963 | 41773  | 40261  | 1513 | 1.37  | 99.27 |
| scaffold03573 | 784  | 3695 | 2912 | 58.72 | C_unshiu_01070 | 41784  | 38874  | 2911 | 2.95  | 99.76 |
| scaffold03573 | 3725 | 4864 | 1140 | 22.99 | C_unshiu_01070 | 38654  | 37515  | 1140 | 1.15  | 100   |
| scaffold03576 | 5    | 3340 | 3336 | 67.39 | C_unshiu_00028 | 112798 | 109461 | 3338 | 0.46  | 98.18 |
| scaffold03580 | 3945 | 4945 | 1001 | 20.23 | C_unshiu_00264 | 95495  | 94496  | 1000 | 0.35  | 99.3  |
| scaffold03582 | 3495 | 4933 | 1439 | 29.1  | C_unshiu_00487 | 126036 | 127473 | 1438 | 0.73  | 99.93 |
| scaffold03584 | 1    | 1079 | 1079 | 21.88 | C_unshiu_02239 | 10400  | 11478  | 1079 | 3.37  | 100   |
| scaffold03584 | 1936 | 4198 | 2263 | 45.88 | C_unshiu_02239 | 12166  | 14429  | 2264 | 7.06  | 99.73 |
| scaffold03584 | 3553 | 4932 | 1380 | 27.98 | C_unshiu_00891 | 79117  | 80503  | 1387 | 1.17  | 98.63 |
| scaffold03586 | 1261 | 4942 | 3682 | 74.5  | C_unshiu_00293 | 190036 | 193718 | 3683 | 1.37  | 99.43 |
| scaffold03587 | 1428 | 3990 | 2563 | 51.91 | C_unshiu_00036 | 299430 | 296868 | 2563 | 0.38  | 100   |
| scaffold03588 | 1    | 1027 | 1027 | 20.81 | C_unshiu_00138 | 54315  | 55341  | 1027 | 0.25  | 100   |
| scaffold03588 | 2190 | 3201 | 1012 | 20.5  | C_unshiu_00101 | 170579 | 171590 | 1012 | 0.22  | 100   |
| scaffold03588 | 3195 | 4936 | 1742 | 35.29 | C_unshiu_00138 | 57994  | 59724  | 1731 | 0.43  | 99.25 |
| scaffold03589 | 46   | 1258 | 1213 | 24.65 | C_unshiu_00835 | 74975  | 73753  | 1223 | 0.98  | 98.28 |
| scaffold03590 | 299  | 2280 | 1982 | 40.19 | C_unshiu_01243 | 81438  | 79457  | 1982 | 2.43  | 99.6  |
| scaffold03590 | 3436 | 4730 | 1295 | 26.26 | C_unshiu_01243 | 77997  | 76703  | 1295 | 1.59  | 99.38 |
| scaffold03592 | 1    | 4614 | 4614 | 93.57 | C_unshiu_00474 | 177115 | 172509 | 4607 | 2.29  | 99.85 |
| scaffold03593 | 2572 | 4162 | 1591 | 32.28 | C_unshiu_01561 | 10998  | 12588  | 1591 | 2.66  | 100   |
| scaffold03598 | 1    | 4685 | 4685 | 95.13 | C_unshiu_00082 | 379165 | 383861 | 4697 | 0.99  | 99.74 |
| scaffold03599 | 3858 | 4924 | 1067 | 21.67 | C_unshiu_02375 | 634    | 1699   | 1066 | 3.84  | 99.53 |
| scaffold03600 | 3443 | 4925 | 1483 | 30.11 | C_unshiu_01600 | 40691  | 39218  | 1474 | 2.56  | 99.06 |
| scaffold03601 | 938  | 2091 | 1154 | 23.42 | C_unshiu_00328 | 181514 | 180361 | 1154 | 0.46  | 98.7  |
| scaffold03602 | 1    | 1311 | 1311 | 26.65 | C_unshiu_00728 | 2683   | 3993   | 1311 | 0.94  | 100   |
| scaffold03606 | 584  | 2652 | 2069 | 42.13 | C_unshiu_00256 | 113800 | 115868 | 2069 | 0.71  | 100   |
| scaffold03607 | 1    | 1408 | 1408 | 28.69 | C_unshiu_00684 | 17471  | 16064  | 1408 | 0.95  | 100   |
| scaffold03608 | 1546 | 3362 | 1817 | 37.04 | C_unshiu_00916 | 36300  | 34484  | 1817 | 1.58  | 100   |
| scaffold03610 | 1    | 4204 | 4204 | 85.78 | C_unshiu_00772 | 21861  | 26055  | 4195 | 3.17  | 98.74 |
| scaffold03611 | 1471 | 3003 | 1533 | 31.29 | C_unshiu_01100 | 21248  | 19716  | 1533 | 1.6   | 100   |
| scaffold03612 | 3395 | 4896 | 1502 | 30.68 | C_unshiu_00429 | 36049  | 37550  | 1502 | 0.7   | 100   |
| scaffold03613 | 2700 | 4170 | 1471 | 30.09 | C_unshiu_00557 | 129618 | 128145 | 1474 | 0.83  | 99.32 |
| scaffold03614 | 60   | 2148 | 2089 | 42.68 | C_unshiu_00327 | 80106  | 78025  | 2082 | 0.82  | 98.05 |
| scaffold03616 | 1    | 1122 | 1122 | 22.94 | C_unshiu_01374 | 29974  | 31107  | 1134 | 1.57  | 98.32 |
| scaffold03617 | 1    | 1089 | 1089 | 22.28 | C_unshiu_00004 | 63461  | 64557  | 1097 | 0.09  | 99    |
| scaffold03617 | 3741 | 4888 | 1148 | 23.49 | C_unshiu_00004 | 67694  | 68831  | 1138 | 0.1   | 98.69 |
| scaffold03619 | 3505 | 4878 | 1374 | 28.17 | C_unshiu_01057 | 29578  | 30953  | 1376 | 1.38  | 99.49 |
| scaffold03623 | 1    | 1188 | 1188 | 24.41 | C_unshiu_01332 | 39712  | 40899  | 1188 | 1.58  | 99.49 |

|               |      |      |      |       |                |        |        |      |       |       |
|---------------|------|------|------|-------|----------------|--------|--------|------|-------|-------|
| scaffold03627 | 3126 | 4854 | 1729 | 35.62 | C_unshiu_01006 | 42553  | 44280  | 1728 | 1.64  | 99.94 |
| scaffold03628 | 3315 | 4532 | 1218 | 25.06 | C_unshiu_00105 | 448032 | 449250 | 1219 | 0.27  | 98.44 |
| scaffold03630 | 3077 | 4856 | 1780 | 36.66 | C_unshiu_02666 | 8184   | 6404   | 1781 | 8.65  | 99.78 |
| scaffold03631 | 1    | 1516 | 1516 | 31.26 | C_unshiu_00873 | 23936  | 22427  | 1510 | 1.26  | 98.94 |
| scaffold03631 | 1519 | 2818 | 1300 | 26.81 | C_unshiu_01630 | 1299   | 1      | 1299 | 2.32  | 99.38 |
| scaffold03633 | 1    | 4854 | 4854 | 100   | C_unshiu_03019 | 437    | 5277   | 4841 | 38.96 | 98.62 |
| scaffold03635 | 1    | 1039 | 1039 | 21.44 | C_unshiu_00154 | 368563 | 369617 | 1055 | 0.28  | 98.2  |
| scaffold03635 | 1    | 1039 | 1039 | 21.44 | C_unshiu_02011 | 952    | 2004   | 1053 | 2.61  | 98.39 |
| scaffold03635 | 2085 | 4835 | 2751 | 56.77 | C_unshiu_00154 | 369952 | 372701 | 2750 | 0.72  | 98.48 |
| scaffold03639 | 1    | 4398 | 4398 | 92.26 | C_unshiu_00892 | 58263  | 53873  | 4391 | 3.73  | 99.61 |
| scaffold03640 | 3166 | 4751 | 1586 | 32.8  | C_unshiu_00306 | 37743  | 36158  | 1586 | 0.61  | 100   |
| scaffold03643 | 1    | 3236 | 3236 | 66.94 | C_unshiu_02349 | 11959  | 8726   | 3234 | 11.4  | 99.07 |
| scaffold03644 | 1    | 4836 | 4836 | 100   | C_unshiu_01104 | 9414   | 4579   | 4836 | 5.05  | 100   |
| scaffold03647 | 1    | 2121 | 2121 | 43.93 | C_unshiu_00263 | 249562 | 247422 | 2141 | 0.75  | 98.51 |
| scaffold03649 | 1    | 1095 | 1095 | 22.69 | C_unshiu_00013 | 276732 | 277825 | 1094 | 0.12  | 99.82 |
| scaffold03650 | 1    | 1444 | 1444 | 29.93 | C_unshiu_00737 | 47049  | 45622  | 1428 | 1.03  | 98.34 |
| scaffold03650 | 3278 | 4825 | 1548 | 32.08 | C_unshiu_00090 | 206657 | 208204 | 1548 | 0.33  | 100   |
| scaffold03654 | 18   | 1629 | 1612 | 33.45 | C_unshiu_00547 | 64106  | 65722  | 1617 | 0.9   | 99.69 |
| scaffold03656 | 1    | 3272 | 3272 | 68.08 | C_unshiu_00037 | 409093 | 405818 | 3276 | 0.49  | 99.11 |
| scaffold03658 | 1    | 4810 | 4810 | 100   | C_unshiu_00589 | 48953  | 53761  | 4809 | 2.83  | 99.79 |
| scaffold03659 | 1    | 4804 | 4804 | 100   | C_unshiu_01633 | 23419  | 18603  | 4817 | 8.64  | 98.67 |
| scaffold03660 | 1    | 4801 | 4801 | 99.98 | C_unshiu_01549 | 53505  | 58324  | 4820 | 7.95  | 99.32 |
| scaffold03662 | 1    | 2056 | 2056 | 42.82 | C_unshiu_00053 | 565928 | 563873 | 2056 | 0.34  | 100   |
| scaffold03662 | 3047 | 4801 | 1755 | 36.55 | C_unshiu_00053 | 562694 | 560940 | 1755 | 0.29  | 100   |
| scaffold03664 | 1251 | 3707 | 2457 | 51.28 | C_unshiu_01070 | 64047  | 66513  | 2467 | 2.5   | 99.03 |
| scaffold03665 | 1    | 3125 | 3125 | 65.2  | C_unshiu_02941 | 11585  | 14709  | 3125 | 21.25 | 100   |
| scaffold03665 | 3365 | 4532 | 1168 | 24.37 | C_unshiu_00748 | 75241  | 76420  | 1180 | 0.86  | 98.64 |
| scaffold03666 | 2851 | 4794 | 1944 | 40.55 | C_unshiu_01133 | 14714  | 12771  | 1944 | 2.1   | 100   |
| scaffold03673 | 1078 | 2735 | 1658 | 34.66 | C_unshiu_00845 | 34380  | 32723  | 1658 | 1.35  | 98.73 |
| scaffold03674 | 1    | 1228 | 1228 | 25.67 | C_unshiu_00085 | 238516 | 237289 | 1228 | 0.26  | 99.67 |
| scaffold03674 | 2989 | 4783 | 1795 | 37.53 | C_unshiu_00085 | 235181 | 233385 | 1797 | 0.38  | 99.89 |
| scaffold03677 | 3125 | 4764 | 1640 | 34.42 | C_unshiu_00442 | 109049 | 107410 | 1640 | 0.78  | 100   |
| scaffold03682 | 3286 | 4765 | 1480 | 31.06 | C_unshiu_00072 | 441613 | 443085 | 1473 | 0.28  | 99.26 |
| scaffold03684 | 968  | 2262 | 1295 | 27.17 | C_unshiu_00278 | 88160  | 89467  | 1308 | 0.47  | 98.09 |
| scaffold03684 | 3226 | 4767 | 1542 | 32.35 | C_unshiu_00278 | 90686  | 92232  | 1547 | 0.56  | 98.25 |
| scaffold03690 | 1    | 1581 | 1581 | 33.21 | C_unshiu_01428 | 61895  | 60316  | 1580 | 2.31  | 99.18 |
| scaffold03691 | 3322 | 4759 | 1438 | 30.22 | C_unshiu_00111 | 337668 | 336231 | 1438 | 0.33  | 100   |
| scaffold03692 | 1    | 1438 | 1438 | 30.22 | C_unshiu_01676 | 18523  | 17087  | 1437 | 2.67  | 99.3  |
| scaffold03693 | 1    | 2268 | 2268 | 47.68 | C_unshiu_00097 | 9880   | 7613   | 2268 | 0.49  | 100   |
| scaffold03694 | 1    | 2211 | 2211 | 46.48 | C_unshiu_01012 | 61026  | 58823  | 2204 | 2.1   | 98.15 |
| scaffold03699 | 1355 | 4750 | 3396 | 71.49 | C_unshiu_02057 | 4367   | 7766   | 3400 | 8.86  | 98.38 |
| scaffold03700 | 1    | 1022 | 1022 | 21.52 | C_unshiu_01006 | 102359 | 101338 | 1022 | 0.97  | 100   |
| scaffold03700 | 3274 | 4557 | 1284 | 27.03 | C_unshiu_01006 | 98980  | 97706  | 1275 | 1.21  | 98.91 |
| scaffold03705 | 3730 | 4740 | 1011 | 21.33 | C_unshiu_00042 | 607920 | 606911 | 1010 | 0.16  | 99.11 |
| scaffold03706 | 1009 | 4739 | 3731 | 78.73 | C_unshiu_00454 | 26565  | 22849  | 3717 | 1.8   | 98.23 |
| scaffold03709 | 2035 | 4729 | 2695 | 56.99 | C_unshiu_00453 | 176968 | 174275 | 2694 | 1.3   | 99.55 |
| scaffold03711 | 1508 | 2710 | 1203 | 25.41 | C_unshiu_01361 | 33635  | 32422  | 1214 | 1.65  | 98.76 |
| scaffold03713 | 2545 | 4292 | 1748 | 36.95 | C_unshiu_00225 | 209941 | 211703 | 1763 | 0.56  | 98.19 |
| scaffold03714 | 2098 | 4729 | 2632 | 55.66 | C_unshiu_00064 | 177523 | 174900 | 2624 | 0.47  | 98.82 |
| scaffold03715 | 2756 | 4730 | 1975 | 41.75 | C_unshiu_00669 | 34523  | 36497  | 1975 | 1.29  | 99.9  |
| scaffold03716 | 1    | 1474 | 1474 | 31.17 | C_unshiu_01456 | 56042  | 54569  | 1474 | 2.23  | 99.93 |
| scaffold03717 | 1    | 2058 | 2058 | 43.53 | C_unshiu_01784 | 36603  | 38659  | 2057 | 4.19  | 99.76 |
| scaffold03718 | 1    | 1664 | 1664 | 35.24 | C_unshiu_01445 | 11865  | 10203  | 1663 | 2.48  | 98.26 |
| scaffold03719 | 1    | 1157 | 1157 | 24.5  | C_unshiu_02717 | 2505   | 1348   | 1158 | 5.92  | 99.83 |
| scaffold03720 | 2721 | 4722 | 2002 | 42.4  | C_unshiu_00224 | 238215 | 240200 | 1986 | 0.64  | 98.16 |
| scaffold03722 | 13   | 1034 | 1022 | 21.67 | C_unshiu_00290 | 17650  | 18671  | 1022 | 0.38  | 99.22 |
| scaffold03723 | 1    | 1173 | 1173 | 24.91 | C_unshiu_00755 | 27142  | 28315  | 1174 | 0.87  | 99.83 |
| scaffold03723 | 3602 | 4709 | 1108 | 23.53 | C_unshiu_00961 | 7541   | 8640   | 1100 | 0.99  | 98.29 |
| scaffold03724 | 1    | 1634 | 1634 | 34.68 | C_unshiu_00080 | 358816 | 360449 | 1634 | 0.33  | 100   |
| scaffold03724 | 3051 | 4712 | 1662 | 35.27 | C_unshiu_00080 | 350922 | 352585 | 1664 | 0.34  | 98.44 |
| scaffold03725 | 1144 | 4191 | 3048 | 64.69 | C_unshiu_00037 | 619410 | 616332 | 3079 | 0.46  | 98.54 |
| scaffold03728 | 1    | 1952 | 1952 | 41.45 | C_unshiu_00852 | 62716  | 60766  | 1951 | 1.59  | 99.9  |
| scaffold03733 | 80   | 1289 | 1210 | 25.73 | C_unshiu_00121 | 42444  | 41231  | 1214 | 0.29  | 98.6  |
| scaffold03733 | 3670 | 4702 | 1033 | 21.97 | C_unshiu_00121 | 38573  | 37538  | 1036 | 0.25  | 99.61 |
| scaffold03738 | 2787 | 4696 | 1910 | 40.67 | C_unshiu_01211 | 8201   | 10111  | 1911 | 2.27  | 99.95 |
| scaffold03739 | 3250 | 4692 | 1443 | 30.75 | C_unshiu_01718 | 1      | 1443   | 1443 | 2.78  | 99.03 |
| scaffold03740 | 1471 | 3734 | 2264 | 48.31 | C_unshiu_01054 | 76678  | 78941  | 2264 | 2.27  | 100   |
| scaffold03744 | 3071 | 4484 | 1414 | 30.19 | C_unshiu_00009 | 139753 | 141173 | 1421 | 0.13  | 98.04 |
| scaffold03747 | 1    | 1060 | 1060 | 22.65 | C_unshiu_00412 | 172557 | 171499 | 1059 | 0.48  | 98.96 |
| scaffold03747 | 2255 | 3780 | 1526 | 32.61 | C_unshiu_02485 | 12779  | 11254  | 1526 | 6.09  | 100   |
| scaffold03748 | 2989 | 4678 | 1690 | 36.13 | C_unshiu_00633 | 47093  | 48782  | 1690 | 1.05  | 100   |
| scaffold03752 | 1    | 1285 | 1285 | 27.52 | C_unshiu_00671 | 42333  | 43617  | 1285 | 0.85  | 99.61 |
| scaffold03756 | 3101 | 4655 | 1555 | 33.4  | C_unshiu_02591 | 18608  | 17055  | 1554 | 6.94  | 99.94 |
| scaffold03762 | 3559 | 4659 | 1101 | 23.63 | C_unshiu_00757 | 58121  | 59221  | 1101 | 0.82  | 100   |
| scaffold03763 | 2255 | 3932 | 1678 | 36.04 | C_unshiu_00768 | 41325  | 39648  | 1678 | 1.26  | 99.4  |
| scaffold03765 | 2984 | 4069 | 1086 | 23.32 | C_unshiu_01406 | 48733  | 49818  | 1086 | 1.55  | 100   |
| scaffold03766 | 575  | 1912 | 1338 | 28.76 | C_unshiu_00118 | 354954 | 356291 | 1338 | 0.31  | 99.93 |
| scaffold03767 | 1    | 1781 | 1781 | 38.28 | C_unshiu_00016 | 280183 | 281963 | 1781 | 0.2   | 99.94 |
| scaffold03769 | 3449 | 4650 | 1202 | 25.85 | C_unshiu_00482 | 67962  | 66756  | 1207 | 0.61  | 99.25 |

|               |      |      |      |       |                |        |        |      |       |       |
|---------------|------|------|------|-------|----------------|--------|--------|------|-------|-------|
| scaffold03772 | 1    | 2950 | 2950 | 63.5  | C_unshiu_00191 | 25873  | 28823  | 2951 | 0.86  | 99.97 |
| scaffold03774 | 1    | 1459 | 1459 | 31.51 | C_unshiu_00627 | 114675 | 116132 | 1458 | 0.91  | 99.45 |
| scaffold03774 | 263  | 1721 | 1459 | 31.51 | C_unshiu_02847 | 14707  | 16162  | 1456 | 8.71  | 98.15 |
| scaffold03776 | 1    | 1570 | 1570 | 33.88 | C_unshiu_01562 | 14405  | 15971  | 1567 | 2.62  | 99.49 |
| scaffold03776 | 1561 | 2630 | 1070 | 23.09 | C_unshiu_00784 | 100654 | 101723 | 1070 | 0.82  | 100   |
| scaffold03776 | 3632 | 4634 | 1003 | 21.64 | C_unshiu_00493 | 193244 | 192242 | 1003 | 0.52  | 100   |
| scaffold03779 | 2202 | 4629 | 2428 | 52.45 | C_unshiu_02205 | 3554   | 1119   | 2436 | 7.37  | 99.1  |
| scaffold03780 | 1    | 1659 | 1659 | 35.87 | C_unshiu_00773 | 23011  | 21380  | 1632 | 1.23  | 98.25 |
| scaffold03781 | 1534 | 3797 | 2264 | 49.05 | C_unshiu_00102 | 44130  | 41867  | 2264 | 0.5   | 100   |
| scaffold03782 | 1    | 2518 | 2518 | 54.6  | C_unshiu_00326 | 27606  | 30124  | 2519 | 0.99  | 99.37 |
| scaffold03783 | 1    | 1052 | 1052 | 22.77 | C_unshiu_00737 | 79199  | 80250  | 1052 | 0.76  | 99.9  |
| scaffold03783 | 2682 | 4067 | 1386 | 29.99 | C_unshiu_00737 | 81526  | 82910  | 1385 | 1     | 99.71 |
| scaffold03786 | 1    | 3729 | 3729 | 80.71 | C_unshiu_01881 | 38060  | 34368  | 3693 | 8.14  | 98.61 |
| scaffold03787 | 1    | 4620 | 4620 | 100   | C_unshiu_00521 | 34162  | 38781  | 4620 | 2.49  | 100   |
| scaffold03789 | 1    | 4023 | 4023 | 87.12 | C_unshiu_03057 | 5045   | 9046   | 4002 | 35.62 | 98.98 |
| scaffold03790 | 29   | 2609 | 2581 | 55.99 | C_unshiu_00008 | 432533 | 435113 | 2581 | 0.24  | 99.42 |
| scaffold03791 | 1    | 1760 | 1760 | 38.12 | C_unshiu_00353 | 180600 | 182360 | 1761 | 0.74  | 98.41 |
| scaffold03791 | 1753 | 2872 | 1120 | 24.26 | C_unshiu_00082 | 255049 | 256168 | 1120 | 0.24  | 100   |
| scaffold03792 | 3460 | 4614 | 1155 | 25.03 | C_unshiu_02282 | 26348  | 25194  | 1155 | 3.82  | 99.57 |
| scaffold03796 | 1    | 1064 | 1064 | 23.09 | C_unshiu_00405 | 104563 | 103500 | 1064 | 0.48  | 100   |
| scaffold03798 | 3217 | 4604 | 1388 | 30.15 | C_unshiu_02037 | 29277  | 30664  | 1388 | 3.54  | 99.78 |
| scaffold03801 | 805  | 3580 | 2776 | 60.32 | C_unshiu_00646 | 137526 | 134751 | 2776 | 1.76  | 100   |
| scaffold03802 | 2607 | 4602 | 1996 | 43.37 | C_unshiu_00208 | 81915  | 83902  | 1988 | 0.6   | 98.6  |
| scaffold03803 | 3585 | 4599 | 1015 | 22.06 | C_unshiu_00768 | 17960  | 18974  | 1015 | 0.76  | 100   |
| scaffold03804 | 1    | 1657 | 1657 | 36.01 | C_unshiu_00007 | 12072  | 10410  | 1663 | 0.15  | 98.44 |
| scaffold03805 | 490  | 1755 | 1266 | 27.53 | C_unshiu_00619 | 38122  | 36856  | 1267 | 0.78  | 99.61 |
| scaffold03807 | 1780 | 4593 | 2814 | 61.27 | C_unshiu_01662 | 36355  | 39181  | 2827 | 5.19  | 99.5  |
| scaffold03808 | 1    | 1255 | 1255 | 27.32 | C_unshiu_00985 | 72374  | 71120  | 1255 | 1.16  | 100   |
| scaffold03809 | 1    | 1446 | 1446 | 31.5  | C_unshiu_00188 | 127253 | 125806 | 1448 | 0.42  | 99.31 |
| scaffold03810 | 1951 | 3966 | 2016 | 43.91 | C_unshiu_00512 | 57203  | 55192  | 2012 | 1.07  | 98.02 |
| scaffold03811 | 1    | 1662 | 1662 | 36.21 | C_unshiu_00400 | 4910   | 6571   | 1662 | 0.75  | 100   |
| scaffold03812 | 2023 | 3973 | 1951 | 42.54 | C_unshiu_00490 | 13273  | 11323  | 1951 | 1     | 100   |
| scaffold03813 | 762  | 2091 | 1330 | 29.18 | C_unshiu_00677 | 107043 | 105714 | 1330 | 0.89  | 100   |
| scaffold03813 | 2092 | 4468 | 2377 | 52.15 | C_unshiu_01134 | 90094  | 87716  | 2379 | 2.57  | 99.79 |
| scaffold03814 | 1    | 2732 | 2732 | 59.59 | C_unshiu_00273 | 230817 | 228087 | 2731 | 0.98  | 99.74 |
| scaffold03814 | 3482 | 4585 | 1104 | 24.08 | C_unshiu_00273 | 227827 | 226722 | 1106 | 0.4   | 99.73 |
| scaffold03816 | 1    | 1366 | 1366 | 29.79 | C_unshiu_00463 | 129920 | 131289 | 1370 | 0.67  | 99.2  |
| scaffold03818 | 1    | 1146 | 1146 | 25    | C_unshiu_00788 | 121140 | 119995 | 1146 | 0.88  | 99.56 |
| scaffold03820 | 1    | 1705 | 1705 | 37.23 | C_unshiu_00051 | 11412  | 9703   | 1710 | 0.29  | 98.25 |
| scaffold03820 | 2233 | 3254 | 1022 | 22.31 | C_unshiu_01398 | 22494  | 21473  | 1022 | 1.45  | 100   |
| scaffold03825 | 623  | 1992 | 1370 | 29.96 | C_unshiu_00647 | 19737  | 18367  | 1371 | 0.87  | 98.69 |
| scaffold03825 | 2859 | 4573 | 1715 | 37.5  | C_unshiu_00647 | 17041  | 15323  | 1719 | 1.09  | 98.95 |
| scaffold03827 | 1    | 4570 | 4570 | 100   | C_unshiu_00565 | 158883 | 154314 | 4570 | 2.61  | 100   |
| scaffold03831 | 1    | 1840 | 1840 | 40.35 | C_unshiu_00132 | 367155 | 368995 | 1841 | 0.45  | 98.37 |
| scaffold03832 | 1136 | 4561 | 3426 | 75.12 | C_unshiu_00267 | 231916 | 228491 | 3426 | 1.21  | 99.82 |
| scaffold03833 | 1    | 1889 | 1889 | 41.43 | C_unshiu_01304 | 50592  | 48704  | 1889 | 2.44  | 100   |
| scaffold03835 | 1    | 1696 | 1696 | 37.19 | C_unshiu_01083 | 19768  | 21463  | 1696 | 1.74  | 99.35 |
| scaffold03835 | 1697 | 3174 | 1478 | 32.41 | C_unshiu_01083 | 18315  | 19792  | 1478 | 1.51  | 99.59 |
| scaffold03836 | 1    | 1049 | 1049 | 23.01 | C_unshiu_00578 | 88322  | 87274  | 1049 | 0.61  | 100   |
| scaffold03837 | 1    | 1210 | 1210 | 26.54 | C_unshiu_01336 | 73574  | 72366  | 1209 | 1.62  | 98.93 |
| scaffold03839 | 1    | 1083 | 1083 | 23.77 | C_unshiu_01564 | 14436  | 15520  | 1085 | 1.82  | 99.63 |
| scaffold03840 | 2800 | 4545 | 1746 | 38.42 | C_unshiu_01290 | 61167  | 59422  | 1746 | 2.23  | 100   |
| scaffold03842 | 1    | 1300 | 1300 | 28.51 | C_unshiu_00220 | 296522 | 295222 | 1301 | 0.41  | 98.54 |
| scaffold03843 | 1    | 2314 | 2314 | 50.8  | C_unshiu_00164 | 211281 | 213594 | 2314 | 0.63  | 99.35 |
| scaffold03844 | 2139 | 4554 | 2416 | 53.05 | C_unshiu_00555 | 162066 | 164478 | 2413 | 1.36  | 98.84 |
| scaffold03847 | 1    | 2007 | 2007 | 44.1  | C_unshiu_00015 | 815022 | 817028 | 2007 | 0.23  | 99.6  |
| scaffold03850 | 2941 | 4550 | 1610 | 35.38 | C_unshiu_01529 | 26137  | 24527  | 1611 | 2.61  | 99.69 |
| scaffold03851 | 803  | 1988 | 1186 | 26.07 | C_unshiu_00422 | 165035 | 163850 | 1186 | 0.54  | 100   |
| scaffold03852 | 1    | 4550 | 4550 | 100   | C_unshiu_00855 | 30577  | 26029  | 4549 | 3.72  | 99.3  |
| scaffold03856 | 946  | 3607 | 2662 | 58.57 | C_unshiu_00235 | 292919 | 290258 | 2662 | 0.87  | 100   |
| scaffold03858 | 1    | 1094 | 1094 | 24.08 | C_unshiu_01303 | 4348   | 5442   | 1095 | 1.42  | 99.73 |
| scaffold03858 | 3485 | 4544 | 1060 | 23.33 | C_unshiu_01303 | 7861   | 8919   | 1059 | 1.37  | 99.91 |
| scaffold03862 | 1    | 1291 | 1291 | 28.45 | C_unshiu_02083 | 34413  | 35703  | 1291 | 3.47  | 98.68 |
| scaffold03864 | 687  | 3588 | 2902 | 64.02 | C_unshiu_00144 | 274645 | 271744 | 2902 | 0.73  | 100   |
| scaffold03867 | 3280 | 4530 | 1251 | 27.62 | C_unshiu_00499 | 82148  | 83401  | 1254 | 0.65  | 99.36 |
| scaffold03868 | 1    | 1128 | 1128 | 24.96 | C_unshiu_00471 | 127540 | 128666 | 1127 | 0.56  | 99.73 |
| scaffold03868 | 2476 | 3691 | 1216 | 26.91 | C_unshiu_01050 | 81631  | 82846  | 1216 | 1.22  | 100   |
| scaffold03868 | 2483 | 3699 | 1217 | 26.93 | C_unshiu_00771 | 28952  | 30168  | 1217 | 0.92  | 100   |
| scaffold03870 | 884  | 3053 | 2170 | 47.93 | C_unshiu_00554 | 90632  | 92802  | 2171 | 1.23  | 99.36 |
| scaffold03876 | 1    | 4354 | 4354 | 96.35 | C_unshiu_00041 | 194999 | 199376 | 4378 | 0.67  | 98.59 |
| scaffold03880 | 3387 | 4503 | 1117 | 24.73 | C_unshiu_00047 | 151320 | 150206 | 1115 | 0.18  | 98.75 |
| scaffold03883 | 1    | 1564 | 1564 | 34.64 | C_unshiu_02850 | 7714   | 9277   | 1564 | 9.37  | 99.62 |
| scaffold03884 | 2617 | 3767 | 1151 | 25.52 | C_unshiu_01747 | 20994  | 19844  | 1151 | 2.27  | 100   |
| scaffold03885 | 1    | 1067 | 1067 | 23.63 | C_unshiu_00179 | 222142 | 223212 | 1071 | 0.3   | 98.42 |
| scaffold03887 | 1858 | 3594 | 1737 | 38.44 | C_unshiu_00038 | 332829 | 331103 | 1727 | 0.26  | 98.62 |
| scaffold03889 | 1    | 3197 | 3197 | 70.93 | C_unshiu_01185 | 21060  | 17864  | 3197 | 3.68  | 99.94 |
| scaffold03889 | 3201 | 4500 | 1300 | 28.84 | C_unshiu_01185 | 16578  | 17878  | 1301 | 1.5   | 99.92 |
| scaffold03891 | 1    | 1008 | 1008 | 22.37 | C_unshiu_01124 | 89362  | 90369  | 1008 | 1.08  | 100   |
| scaffold03891 | 1322 | 3911 | 2590 | 57.48 | C_unshiu_01124 | 90840  | 93431  | 2592 | 2.77  | 99.92 |

|               |      |      |      |       |                |         |         |      |       |       |
|---------------|------|------|------|-------|----------------|---------|---------|------|-------|-------|
| scaffold03892 | 1    | 1081 | 1081 | 24    | C_unshiu_02424 | 15894   | 14813   | 1082 | 4.03  | 99.08 |
| scaffold03898 | 2988 | 4497 | 1510 | 33.58 | C_unshiu_02981 | 3757    | 5266    | 1510 | 11.23 | 98.34 |
| scaffold03899 | 1    | 2312 | 2312 | 51.45 | C_unshiu_01145 | 83046   | 85357   | 2312 | 2.53  | 100   |
| scaffold03899 | 3149 | 4494 | 1346 | 29.95 | C_unshiu_01145 | 86107   | 87473   | 1367 | 1.5   | 98.46 |
| scaffold03902 | 3309 | 4495 | 1187 | 26.41 | C_unshiu_01175 | 79728   | 80914   | 1187 | 1.35  | 99.66 |
| scaffold03904 | 1    | 4501 | 4501 | 100   | C_unshiu_00057 | 390218  | 385718  | 4501 | 0.76  | 99.87 |
| scaffold03910 | 1    | 1028 | 1028 | 22.94 | C_unshiu_00481 | 15663   | 14635   | 1029 | 0.52  | 98.06 |
| scaffold03912 | 1206 | 2557 | 1352 | 30.19 | C_unshiu_00347 | 178771  | 180125  | 1355 | 0.55  | 99.12 |
| scaffold03914 | 1    | 1544 | 1544 | 34.5  | C_unshiu_00274 | 40535   | 42067   | 1533 | 0.55  | 98.45 |
| scaffold03914 | 2577 | 4475 | 1899 | 42.44 | C_unshiu_00274 | 43368   | 45267   | 1900 | 0.68  | 99    |
| scaffold03915 | 1700 | 3914 | 2215 | 49.52 | C_unshiu_00796 | 106622  | 108836  | 2215 | 1.72  | 100   |
| scaffold03918 | 3322 | 4471 | 1150 | 25.72 | C_unshiu_00648 | 14868   | 16023   | 1156 | 0.74  | 98.96 |
| scaffold03922 | 12   | 3736 | 3725 | 83.41 | C_unshiu_00020 | 522680  | 526407  | 3728 | 0.47  | 98.74 |
| scaffold03924 | 1    | 1101 | 1101 | 24.67 | C_unshiu_00707 | 113970  | 112870  | 1101 | 0.77  | 100   |
| scaffold03924 | 1202 | 4463 | 3262 | 73.09 | C_unshiu_00707 | 112730  | 109469  | 3262 | 2.28  | 99.94 |
| scaffold03925 | 1    | 1449 | 1449 | 32.47 | C_unshiu_00275 | 135627  | 134180  | 1448 | 0.52  | 98.14 |
| scaffold03926 | 1    | 1238 | 1238 | 27.75 | C_unshiu_00670 | 8975    | 10212   | 1238 | 0.81  | 100   |
| scaffold03928 | 68   | 1120 | 1053 | 23.62 | C_unshiu_00958 | 58141   | 59198   | 1058 | 0.95  | 99.24 |
| scaffold03933 | 1    | 1343 | 1343 | 30.15 | C_unshiu_00803 | 22269   | 23615   | 1347 | 1.05  | 99.48 |
| scaffold03933 | 3368 | 4455 | 1088 | 24.42 | C_unshiu_00803 | 25737   | 26824   | 1088 | 0.85  | 99.82 |
| scaffold03936 | 1859 | 3519 | 1661 | 37.33 | C_unshiu_00435 | 202937  | 201277  | 1661 | 0.78  | 100   |
| scaffold03938 | 3208 | 4449 | 1242 | 27.92 | C_unshiu_00011 | 74993   | 73744   | 1250 | 0.13  | 98.4  |
| scaffold03942 | 2028 | 3852 | 1825 | 41.06 | C_unshiu_00433 | 45588   | 43764   | 1825 | 0.85  | 100   |
| scaffold03943 | 1058 | 3478 | 2421 | 54.49 | C_unshiu_00147 | 41616   | 44036   | 2421 | 0.62  | 100   |
| scaffold03947 | 455  | 1728 | 1274 | 28.71 | C_unshiu_00362 | 172912  | 171636  | 1277 | 0.54  | 99.06 |
| scaffold03949 | 1    | 1181 | 1181 | 26.65 | C_unshiu_00324 | 71615   | 72801   | 1187 | 0.47  | 98.4  |
| scaffold03951 | 2473 | 4430 | 1958 | 44.2  | C_unshiu_02460 | 15696   | 17646   | 1951 | 7.56  | 98.88 |
| scaffold03952 | 3140 | 4426 | 1287 | 29.08 | C_unshiu_01047 | 64327   | 65614   | 1288 | 1.28  | 98.22 |
| scaffold03954 | 1    | 4423 | 4423 | 100   | C_unshiu_00001 | 1864366 | 1859942 | 4425 | 0.17  | 99.82 |
| scaffold03955 | 1    | 1075 | 1075 | 24.35 | C_unshiu_00092 | 173878  | 174952  | 1075 | 0.23  | 100   |
| scaffold03955 | 1076 | 2132 | 1057 | 23.94 | C_unshiu_00474 | 83912   | 84968   | 1057 | 0.53  | 100   |
| scaffold03956 | 1    | 3132 | 3132 | 70.6  | C_unshiu_00121 | 268450  | 265315  | 3136 | 0.74  | 98.29 |
| scaffold03960 | 3286 | 4414 | 1129 | 25.58 | C_unshiu_02392 | 19666   | 20791   | 1126 | 4.11  | 99.03 |
| scaffold03965 | 2094 | 4417 | 2324 | 52.61 | C_unshiu_00007 | 921242  | 918921  | 2322 | 0.21  | 98.84 |
| scaffold03968 | 1    | 4414 | 4414 | 100   | C_unshiu_00144 | 202690  | 198217  | 4474 | 1.13  | 98.39 |
| scaffold03970 | 1    | 1124 | 1124 | 25.47 | C_unshiu_00083 | 172168  | 173291  | 1124 | 0.24  | 98.58 |
| scaffold03975 | 1    | 4402 | 4402 | 100   | C_unshiu_00833 | 85808   | 81404   | 4405 | 3.54  | 99.93 |
| scaffold03976 | 1    | 1176 | 1176 | 26.73 | C_unshiu_00018 | 219882  | 218694  | 1189 | 0.14  | 98.49 |
| scaffold03976 | 2018 | 4366 | 2349 | 53.39 | C_unshiu_00018 | 217373  | 215038  | 2336 | 0.27  | 98.72 |
| scaffold03979 | 2570 | 4166 | 1597 | 36.36 | C_unshiu_00245 | 65975   | 64360   | 1616 | 0.54  | 98.64 |
| scaffold03981 | 1108 | 3563 | 2456 | 55.93 | C_unshiu_00324 | 24340   | 21885   | 2456 | 0.96  | 100   |
| scaffold03982 | 2990 | 4394 | 1405 | 31.98 | C_unshiu_01297 | 45361   | 43962   | 1400 | 1.8   | 99.36 |
| scaffold03985 | 1    | 1145 | 1145 | 26.09 | C_unshiu_00555 | 93652   | 94796   | 1145 | 0.65  | 100   |
| scaffold03998 | 153  | 1215 | 1063 | 24.31 | C_unshiu_00596 | 66799   | 65737   | 1063 | 0.63  | 98.87 |
| scaffold03999 | 1    | 1749 | 1749 | 40.01 | C_unshiu_00730 | 57294   | 59040   | 1747 | 1.26  | 99.66 |
| scaffold03999 | 1744 | 3504 | 1761 | 40.29 | C_unshiu_01092 | 59259   | 57499   | 1761 | 1.82  | 100   |
| scaffold04006 | 952  | 2921 | 1970 | 45.14 | C_unshiu_01424 | 50156   | 52125   | 1970 | 2.87  | 100   |
| scaffold04006 | 2914 | 4364 | 1451 | 33.25 | C_unshiu_01576 | 38749   | 37298   | 1452 | 2.47  | 99.93 |
| scaffold04008 | 1189 | 3836 | 2648 | 60.68 | C_unshiu_00873 | 88148   | 85497   | 2652 | 2.21  | 99.4  |
| scaffold04009 | 1073 | 4355 | 3283 | 75.26 | C_unshiu_00441 | 169408  | 172686  | 3279 | 1.55  | 99.39 |
| scaffold04010 | 1195 | 2259 | 1065 | 24.42 | C_unshiu_00159 | 105796  | 106860  | 1065 | 0.29  | 100   |
| scaffold04010 | 2315 | 4362 | 2048 | 46.95 | C_unshiu_00159 | 106951  | 108998  | 2048 | 0.55  | 100   |
| scaffold04019 | 1    | 3541 | 3541 | 81.27 | C_unshiu_00211 | 222196  | 225730  | 3535 | 1.08  | 99.35 |
| scaffold04022 | 3062 | 4312 | 1251 | 29.01 | C_unshiu_00824 | 61633   | 60383   | 1251 | 0.99  | 100   |
| scaffold04024 | 1    | 1429 | 1429 | 32.88 | C_unshiu_00735 | 53490   | 52062   | 1429 | 1.03  | 100   |
| scaffold04025 | 2251 | 4346 | 2096 | 48.23 | C_unshiu_00263 | 103336  | 101241  | 2096 | 0.74  | 99.76 |
| scaffold04026 | 1    | 4345 | 4345 | 100   | C_unshiu_00472 | 64331   | 68675   | 4345 | 2.16  | 99.98 |
| scaffold04027 | 276  | 4352 | 4077 | 93.68 | C_unshiu_00846 | 79214   | 83335   | 4122 | 3.35  | 98.06 |
| scaffold04028 | 1    | 3620 | 3620 | 83.37 | C_unshiu_00063 | 161766  | 158146  | 3621 | 0.65  | 99.92 |
| scaffold04031 | 1    | 1736 | 1736 | 40.05 | C_unshiu_02936 | 13009   | 14753   | 1745 | 11.83 | 98.34 |
| scaffold04032 | 550  | 3318 | 2769 | 63.82 | C_unshiu_00766 | 68781   | 71549   | 2769 | 2.07  | 100   |
| scaffold04033 | 2762 | 4339 | 1578 | 36.37 | C_unshiu_00224 | 299414  | 300992  | 1579 | 0.5   | 99.94 |
| scaffold04035 | 830  | 2773 | 1944 | 44.89 | C_unshiu_01323 | 21130   | 19187   | 1944 | 2.58  | 100   |
| scaffold04035 | 2768 | 4331 | 1564 | 36.11 | C_unshiu_00256 | 159339  | 160902  | 1564 | 0.54  | 100   |
| scaffold04036 | 651  | 2431 | 1781 | 41.13 | C_unshiu_00058 | 98892   | 100680  | 1789 | 0.3   | 98.83 |
| scaffold04036 | 3143 | 4330 | 1188 | 27.44 | C_unshiu_00058 | 100682  | 101869  | 1188 | 0.2   | 99.49 |
| scaffold04037 | 1    | 1601 | 1601 | 36.97 | C_unshiu_01836 | 22807   | 24419   | 1613 | 3.43  | 98.14 |
| scaffold04037 | 1593 | 3602 | 2010 | 46.42 | C_unshiu_01520 | 18915   | 16906   | 2010 | 3.23  | 99.95 |
| scaffold04040 | 2342 | 4326 | 1985 | 45.89 | C_unshiu_00065 | 311783  | 309801  | 1983 | 0.36  | 99.75 |
| scaffold04041 | 1    | 2051 | 2051 | 47.51 | C_unshiu_02447 | 21510   | 19465   | 2046 | 7.8   | 99.22 |
| scaffold04043 | 1    | 1015 | 1015 | 23.49 | C_unshiu_00157 | 111856  | 112875  | 1020 | 0.27  | 98.82 |
| scaffold04048 | 1070 | 3104 | 2035 | 47.12 | C_unshiu_01946 | 18875   | 20909   | 2035 | 4.74  | 99.95 |
| scaffold04048 | 3105 | 4319 | 1215 | 28.13 | C_unshiu_00147 | 36846   | 35629   | 1218 | 0.31  | 98.19 |
| scaffold04052 | 1    | 4056 | 4056 | 94.06 | C_unshiu_02364 | 20551   | 24612   | 4062 | 14.5  | 98.77 |
| scaffold04053 | 31   | 4305 | 4275 | 99.3  | C_unshiu_00212 | 277696  | 281986  | 4291 | 1.31  | 98.6  |
| scaffold04057 | 1    | 4311 | 4311 | 100   | C_unshiu_00300 | 88534   | 92869   | 4336 | 1.63  | 98.52 |
| scaffold04058 | 1    | 1598 | 1598 | 37.09 | C_unshiu_02279 | 16715   | 18313   | 1599 | 5.26  | 99.25 |
| scaffold04061 | 1    | 1853 | 1853 | 43.03 | C_unshiu_00458 | 185369  | 187222  | 1854 | 0.9   | 99.84 |
| scaffold04061 | 1854 | 4306 | 2453 | 56.97 | C_unshiu_00183 | 79614   | 82066   | 2453 | 0.69  | 99.96 |

|               |      |      |      |       |                |        |        |      |      |       |
|---------------|------|------|------|-------|----------------|--------|--------|------|------|-------|
| scaffold04062 | 2921 | 4296 | 1376 | 32.01 | C_unshiu_00560 | 107055 | 108430 | 1376 | 0.79 | 98.04 |
| scaffold04063 | 1    | 1178 | 1178 | 27.36 | C_unshiu_00650 | 78415  | 77239  | 1177 | 0.75 | 98.9  |
| scaffold04066 | 2042 | 3143 | 1102 | 25.6  | C_unshiu_00256 | 181355 | 182456 | 1102 | 0.38 | 100   |
| scaffold04067 | 2526 | 4302 | 1777 | 41.31 | C_unshiu_00270 | 15851  | 14071  | 1781 | 0.63 | 98.82 |
| scaffold04068 | 1    | 4303 | 4303 | 100   | C_unshiu_00025 | 439321 | 435018 | 4304 | 0.57 | 99.61 |
| scaffold04070 | 1    | 1671 | 1671 | 38.84 | C_unshiu_00647 | 146655 | 148325 | 1671 | 1.06 | 100   |
| scaffold04071 | 1    | 1753 | 1753 | 40.77 | C_unshiu_00326 | 212852 | 211099 | 1754 | 0.69 | 99.89 |
| scaffold04072 | 1    | 4297 | 4297 | 100   | C_unshiu_00310 | 192243 | 187961 | 4283 | 1.64 | 98.93 |
| scaffold04074 | 1    | 1929 | 1929 | 44.89 | C_unshiu_00549 | 35177  | 33240  | 1938 | 1.08 | 98.97 |
| scaffold04076 | 1    | 4294 | 4294 | 100   | C_unshiu_00378 | 172731 | 168436 | 4296 | 1.86 | 99.03 |
| scaffold04079 | 3    | 4296 | 4294 | 99.95 | C_unshiu_01091 | 22890  | 27177  | 4288 | 4.42 | 98.45 |
| scaffold04084 | 41   | 1754 | 1714 | 39.98 | C_unshiu_00755 | 127838 | 129548 | 1711 | 1.26 | 98.31 |
| scaffold04087 | 2876 | 4281 | 1406 | 32.84 | C_unshiu_01443 | 48502  | 47097  | 1406 | 2.09 | 98.23 |
| scaffold04088 | 1    | 1598 | 1598 | 37.36 | C_unshiu_00689 | 53690  | 52093  | 1598 | 1.09 | 99.94 |
| scaffold04091 | 1    | 1696 | 1696 | 39.67 | C_unshiu_00213 | 234234 | 235925 | 1692 | 0.52 | 99.41 |
| scaffold04091 | 1686 | 3676 | 1991 | 46.57 | C_unshiu_00213 | 235875 | 237863 | 1989 | 0.61 | 99.9  |
| scaffold04093 | 2246 | 4258 | 2013 | 47.28 | C_unshiu_00557 | 107355 | 105340 | 2016 | 1.14 | 99.16 |
| scaffold04094 | 1    | 4279 | 4279 | 100   | C_unshiu_00165 | 274374 | 270097 | 4278 | 1.16 | 99.86 |
| scaffold04095 | 1614 | 4271 | 2658 | 62.23 | C_unshiu_00348 | 224435 | 227091 | 2657 | 1.08 | 99.74 |
| scaffold04099 | 3    | 1495 | 1493 | 34.98 | C_unshiu_00914 | 11534  | 10038  | 1497 | 1.3  | 99    |
| scaffold04100 | 1    | 1461 | 1461 | 34.25 | C_unshiu_00404 | 125174 | 123713 | 1462 | 0.66 | 99.32 |
| scaffold04101 | 2990 | 4258 | 1269 | 29.74 | C_unshiu_00121 | 413357 | 412075 | 1283 | 0.3  | 98.05 |
| scaffold04102 | 3088 | 4263 | 1176 | 27.59 | C_unshiu_00186 | 172823 | 173999 | 1177 | 0.34 | 99.66 |
| scaffold04103 | 1    | 1149 | 1149 | 26.92 | C_unshiu_00174 | 260289 | 259137 | 1153 | 0.32 | 98.96 |
| scaffold04108 | 1    | 1030 | 1030 | 24.18 | C_unshiu_00316 | 14117  | 13088  | 1030 | 0.4  | 100   |
| scaffold04109 | 2091 | 4260 | 2170 | 50.94 | C_unshiu_00481 | 42726  | 40560  | 2167 | 1.1  | 98.07 |
| scaffold04112 | 2183 | 4257 | 2075 | 48.74 | C_unshiu_01027 | 101233 | 99159  | 2075 | 2.01 | 99.61 |
| scaffold04114 | 1    | 1006 | 1006 | 23.64 | C_unshiu_00001 | 642672 | 641667 | 1006 | 0.04 | 100   |
| scaffold04118 | 1    | 4251 | 4251 | 100   | C_unshiu_00542 | 97417  | 93150  | 4268 | 2.37 | 98.76 |
| scaffold04119 | 1    | 3184 | 3184 | 74.9  | C_unshiu_00024 | 45941  | 49104  | 3164 | 0.41 | 98.25 |
| scaffold04121 | 606  | 3059 | 2454 | 57.73 | C_unshiu_02016 | 22322  | 19869  | 2454 | 6.12 | 100   |
| scaffold04121 | 3051 | 4251 | 1201 | 28.25 | C_unshiu_00218 | 178881 | 180081 | 1201 | 0.38 | 99.75 |
| scaffold04124 | 3111 | 4250 | 1140 | 26.82 | C_unshiu_01446 | 30780  | 31921  | 1142 | 1.71 | 98.26 |
| scaffold04127 | 306  | 4213 | 3908 | 92.76 | C_unshiu_00969 | 87359  | 91248  | 3890 | 3.55 | 99.23 |
| scaffold04130 | 2826 | 4245 | 1420 | 33.45 | C_unshiu_01777 | 37988  | 36567  | 1422 | 2.88 | 98.38 |
| scaffold04132 | 1    | 2512 | 2512 | 59.22 | C_unshiu_00082 | 327301 | 329812 | 2512 | 0.53 | 99.32 |
| scaffold04132 | 2635 | 3857 | 1223 | 28.83 | C_unshiu_00178 | 345370 | 344148 | 1223 | 0.34 | 99.51 |
| scaffold04134 | 2883 | 4235 | 1353 | 31.95 | C_unshiu_00346 | 191656 | 190303 | 1354 | 0.55 | 99.85 |
| scaffold04135 | 1    | 3262 | 3262 | 76.93 | C_unshiu_01277 | 49441  | 46178  | 3264 | 4.13 | 99.94 |
| scaffold04137 | 1    | 4237 | 4237 | 100   | C_unshiu_00383 | 8646   | 4397   | 4250 | 1.87 | 98.59 |
| scaffold04139 | 2480 | 3992 | 1513 | 35.85 | C_unshiu_02520 | 17745  | 19249  | 1505 | 6.26 | 98.62 |
| scaffold04140 | 1    | 1426 | 1426 | 33.66 | C_unshiu_02277 | 24566  | 25991  | 1426 | 4.68 | 100   |
| scaffold04144 | 169  | 1213 | 1045 | 24.74 | C_unshiu_02198 | 13271  | 12227  | 1045 | 3.14 | 99.81 |
| scaffold04145 | 1    | 1062 | 1062 | 25.09 | C_unshiu_02962 | 9889   | 8830   | 1060 | 7.54 | 98.5  |
| scaffold04149 | 1    | 4225 | 4225 | 100   | C_unshiu_00351 | 115349 | 111123 | 4227 | 1.76 | 99.34 |
| scaffold04154 | 1    | 1184 | 1184 | 28.08 | C_unshiu_00114 | 359113 | 360299 | 1187 | 0.27 | 99.75 |
| scaffold04154 | 3165 | 4216 | 1052 | 24.95 | C_unshiu_00114 | 362184 | 363235 | 1052 | 0.24 | 100   |
| scaffold04155 | 2717 | 3845 | 1129 | 26.78 | C_unshiu_00195 | 293516 | 292388 | 1129 | 0.33 | 100   |
| scaffold04157 | 1    | 1073 | 1073 | 25.49 | C_unshiu_00643 | 133529 | 134601 | 1073 | 0.68 | 100   |
| scaffold04161 | 233  | 1737 | 1505 | 35.75 | C_unshiu_00232 | 300193 | 301698 | 1506 | 0.49 | 99.93 |
| scaffold04161 | 3053 | 4210 | 1158 | 27.51 | C_unshiu_00232 | 302743 | 303901 | 1159 | 0.38 | 99.91 |
| scaffold04164 | 2913 | 4207 | 1295 | 30.78 | C_unshiu_01433 | 22877  | 24171  | 1295 | 1.9  | 99.61 |
| scaffold04165 | 856  | 3095 | 2240 | 53.28 | C_unshiu_00350 | 209342 | 207103 | 2240 | 0.93 | 100   |
| scaffold04165 | 3188 | 4204 | 1017 | 24.19 | C_unshiu_00318 | 113622 | 112606 | 1017 | 0.4  | 100   |
| scaffold04172 | 3143 | 4200 | 1058 | 25.19 | C_unshiu_00472 | 195385 | 196442 | 1058 | 0.53 | 99.91 |
| scaffold04174 | 919  | 3234 | 2316 | 55.16 | C_unshiu_01688 | 35949  | 38264  | 2316 | 4.37 | 100   |
| scaffold04181 | 709  | 3042 | 2334 | 55.73 | C_unshiu_00735 | 14270  | 11937  | 2334 | 1.69 | 100   |
| scaffold04183 | 1    | 1051 | 1051 | 25.1  | C_unshiu_00151 | 188055 | 187004 | 1052 | 0.27 | 99.9  |
| scaffold04183 | 1100 | 3491 | 2392 | 57.13 | C_unshiu_00383 | 152372 | 149981 | 2392 | 1.05 | 100   |
| scaffold04190 | 3140 | 4181 | 1042 | 24.92 | C_unshiu_00025 | 654318 | 655366 | 1049 | 0.14 | 99.33 |
| scaffold04191 | 1    | 2750 | 2750 | 65.74 | C_unshiu_00099 | 452909 | 450156 | 2754 | 0.6  | 98.01 |
| scaffold04193 | 3166 | 4175 | 1010 | 24.19 | C_unshiu_02918 | 3457   | 4464   | 1008 | 6.58 | 99.41 |
| scaffold04199 | 1766 | 4170 | 2405 | 57.67 | C_unshiu_01467 | 9550   | 7130   | 2421 | 3.69 | 98.35 |
| scaffold04200 | 1    | 1276 | 1276 | 30.6  | C_unshiu_00685 | 35576  | 34292  | 1285 | 0.87 | 98.68 |
| scaffold04203 | 688  | 2874 | 2187 | 52.46 | C_unshiu_00354 | 145163 | 147349 | 2187 | 0.92 | 99.95 |
| scaffold04204 | 927  | 3331 | 2405 | 57.72 | C_unshiu_01299 | 16509  | 14105  | 2405 | 3.1  | 100   |
| scaffold04208 | 1    | 1122 | 1122 | 26.95 | C_unshiu_01490 | 28202  | 29323  | 1122 | 1.76 | 100   |
| scaffold04208 | 1264 | 4164 | 2901 | 69.67 | C_unshiu_01490 | 29576  | 32476  | 2901 | 4.55 | 100   |
| scaffold04210 | 1    | 2235 | 2235 | 53.67 | C_unshiu_00371 | 131965 | 134222 | 2258 | 0.97 | 98.45 |
| scaffold04212 | 1290 | 3634 | 2345 | 56.36 | C_unshiu_00980 | 18477  | 16133  | 2345 | 2.16 | 100   |
| scaffold04214 | 869  | 3465 | 2597 | 62.47 | C_unshiu_00711 | 105879 | 108475 | 2597 | 1.82 | 100   |
| scaffold04218 | 2585 | 4150 | 1566 | 37.73 | C_unshiu_01756 | 47231  | 48796  | 1566 | 3.12 | 100   |
| scaffold04220 | 1    | 1368 | 1368 | 33.01 | C_unshiu_01437 | 13641  | 12274  | 1368 | 2.02 | 100   |
| scaffold04222 | 625  | 2511 | 1887 | 45.55 | C_unshiu_00333 | 29859  | 31745  | 1887 | 0.75 | 100   |
| scaffold04223 | 7    | 3951 | 3945 | 95.17 | C_unshiu_00610 | 100777 | 104728 | 3952 | 2.39 | 98.24 |
| scaffold04228 | 1690 | 3459 | 1770 | 42.78 | C_unshiu_01321 | 41660  | 39891  | 1770 | 2.35 | 100   |
| scaffold04231 | 1226 | 3563 | 2338 | 57.25 | C_unshiu_00837 | 35250  | 37587  | 2338 | 1.88 | 100   |
| scaffold04232 | 1271 | 3743 | 2473 | 59.82 | C_unshiu_01738 | 46185  | 48671  | 2487 | 4.87 | 99.4  |
| scaffold04236 | 1    | 1472 | 1472 | 35.71 | C_unshiu_00811 | 95410  | 96882  | 1473 | 1.16 | 99.93 |

|               |      |      |      |       |                |        |        |      |       |       |
|---------------|------|------|------|-------|----------------|--------|--------|------|-------|-------|
| scaffold04238 | 1461 | 3616 | 2156 | 52.18 | C_unshiu_00689 | 35876  | 33721  | 2156 | 1.47  | 100   |
| scaffold04240 | 1    | 1345 | 1345 | 32.56 | C_unshiu_01519 | 27041  | 25700  | 1342 | 2.15  | 98.44 |
| scaffold04245 | 18   | 4122 | 4105 | 99.59 | C_unshiu_00078 | 228083 | 232179 | 4097 | 0.82  | 98.42 |
| scaffold04249 | 1    | 4141 | 4141 | 100   | C_unshiu_00231 | 225506 | 221327 | 4180 | 1.36  | 98.09 |
| scaffold04253 | 1106 | 3515 | 2410 | 58.65 | C_unshiu_00239 | 137528 | 139937 | 2410 | 0.8   | 100   |
| scaffold04259 | 3016 | 4105 | 1090 | 26.55 | C_unshiu_01852 | 14407  | 15496  | 1090 | 2.35  | 100   |
| scaffold04260 | 1    | 1022 | 1022 | 24.91 | C_unshiu_00080 | 231280 | 232301 | 1022 | 0.21  | 99.71 |
| scaffold04269 | 2341 | 3390 | 1050 | 25.63 | C_unshiu_00413 | 100454 | 101503 | 1050 | 0.48  | 100   |
| scaffold04272 | 367  | 2715 | 2349 | 57.46 | C_unshiu_00278 | 210630 | 212995 | 2366 | 0.85  | 98.1  |
| scaffold04274 | 654  | 3348 | 2695 | 65.81 | C_unshiu_01747 | 28223  | 25529  | 2695 | 5.32  | 100   |
| scaffold04276 | 20   | 2264 | 2245 | 54.86 | C_unshiu_00565 | 173250 | 171002 | 2249 | 1.29  | 99.78 |
| scaffold04277 | 1    | 1668 | 1668 | 40.78 | C_unshiu_01835 | 18056  | 16375  | 1682 | 3.57  | 98.04 |
| scaffold04286 | 2402 | 3468 | 1067 | 26.15 | C_unshiu_00480 | 115657 | 116723 | 1067 | 0.54  | 100   |
| scaffold04287 | 1726 | 4080 | 2355 | 57.72 | C_unshiu_00425 | 125226 | 127580 | 2355 | 1.08  | 100   |
| scaffold04290 | 2484 | 4072 | 1589 | 39.02 | C_unshiu_00003 | 766058 | 767647 | 1590 | 0.12  | 99.62 |
| scaffold04292 | 727  | 4078 | 3352 | 82.2  | C_unshiu_00361 | 196365 | 199716 | 3352 | 1.42  | 99.79 |
| scaffold04293 | 2783 | 4076 | 1294 | 31.75 | C_unshiu_00480 | 155326 | 156623 | 1298 | 0.66  | 98.46 |
| scaffold04297 | 1    | 4072 | 4072 | 100   | C_unshiu_00479 | 149573 | 145502 | 4072 | 2.05  | 100   |
| scaffold04303 | 2959 | 4066 | 1108 | 27.25 | C_unshiu_01309 | 34124  | 35231  | 1108 | 1.45  | 99.55 |
| scaffold04304 | 649  | 2439 | 1791 | 44.07 | C_unshiu_00930 | 77765  | 79555  | 1791 | 1.58  | 99.94 |
| scaffold04305 | 1283 | 2340 | 1058 | 26.03 | C_unshiu_00030 | 355031 | 356085 | 1055 | 0.15  | 98.21 |
| scaffold04305 | 2424 | 4064 | 1641 | 40.38 | C_unshiu_00030 | 356195 | 357835 | 1641 | 0.23  | 100   |
| scaffold04306 | 1369 | 3188 | 1820 | 44.78 | C_unshiu_00916 | 36293  | 34473  | 1821 | 1.58  | 99.95 |
| scaffold04307 | 1    | 1160 | 1160 | 28.56 | C_unshiu_00902 | 45510  | 46685  | 1176 | 1.01  | 98.13 |
| scaffold04307 | 2834 | 4061 | 1228 | 30.24 | C_unshiu_01898 | 24957  | 26184  | 1228 | 2.74  | 100   |
| scaffold04308 | 1223 | 4055 | 2833 | 69.86 | C_unshiu_00443 | 88003  | 85171  | 2833 | 1.35  | 100   |
| scaffold04312 | 2985 | 4050 | 1066 | 26.32 | C_unshiu_00166 | 278772 | 277709 | 1064 | 0.29  | 98.69 |
| scaffold04314 | 1    | 4045 | 4045 | 100   | C_unshiu_00058 | 428974 | 433018 | 4045 | 0.68  | 100   |
| scaffold04316 | 1    | 1744 | 1744 | 43.16 | C_unshiu_01993 | 18230  | 19973  | 1744 | 4.27  | 98.74 |
| scaffold04316 | 1738 | 4041 | 2304 | 57.02 | C_unshiu_01417 | 62339  | 60036  | 2304 | 3.31  | 99.44 |
| scaffold04318 | 35   | 4041 | 4007 | 99.13 | C_unshiu_00582 | 65998  | 61980  | 4019 | 2.35  | 98.93 |
| scaffold04323 | 2508 | 4023 | 1516 | 37.68 | C_unshiu_00110 | 431861 | 430348 | 1514 | 0.34  | 99.87 |
| scaffold04326 | 32   | 4028 | 3997 | 99.23 | C_unshiu_00003 | 1214   | 5185   | 3972 | 0.3   | 98.38 |
| scaffold04328 | 832  | 3084 | 2253 | 55.98 | C_unshiu_01138 | 37046  | 34793  | 2254 | 2.44  | 99.96 |
| scaffold04330 | 2663 | 4030 | 1368 | 33.95 | C_unshiu_00949 | 22130  | 23485  | 1356 | 1.21  | 98.9  |
| scaffold04333 | 1    | 1759 | 1759 | 43.7  | C_unshiu_00257 | 256717 | 258474 | 1758 | 0.61  | 99.94 |
| scaffold04333 | 2504 | 4025 | 1522 | 37.81 | C_unshiu_00257 | 259568 | 261085 | 1518 | 0.52  | 98.95 |
| scaffold04334 | 119  | 1131 | 1013 | 25.18 | C_unshiu_00735 | 8822   | 7810   | 1013 | 0.73  | 100   |
| scaffold04336 | 1107 | 4022 | 2916 | 72.5  | C_unshiu_01281 | 9506   | 6593   | 2914 | 3.71  | 98.97 |
| scaffold04338 | 590  | 3245 | 2656 | 66.07 | C_unshiu_00852 | 37292  | 34637  | 2656 | 2.17  | 100   |
| scaffold04338 | 596  | 3246 | 2651 | 65.95 | C_unshiu_00446 | 79778  | 77128  | 2651 | 1.27  | 100   |
| scaffold04340 | 1    | 3987 | 3987 | 99.25 | C_unshiu_01171 | 64312  | 60319  | 3994 | 4.52  | 99.3  |
| scaffold04342 | 630  | 1841 | 1212 | 30.19 | C_unshiu_00138 | 26673  | 25463  | 1211 | 0.3   | 99.92 |
| scaffold04342 | 2871 | 4015 | 1145 | 28.52 | C_unshiu_02375 | 2158   | 3302   | 1145 | 4.12  | 100   |
| scaffold04347 | 962  | 3426 | 2465 | 61.5  | C_unshiu_00276 | 42404  | 39940  | 2465 | 0.89  | 100   |
| scaffold04350 | 1    | 1053 | 1053 | 26.3  | C_unshiu_01643 | 46067  | 45015  | 1053 | 1.9   | 100   |
| scaffold04352 | 1    | 4002 | 4002 | 100   | C_unshiu_00899 | 33747  | 37762  | 4016 | 3.43  | 99.6  |
| scaffold04356 | 2910 | 3998 | 1089 | 27.24 | C_unshiu_01333 | 74544  | 73453  | 1092 | 1.46  | 98.17 |
| scaffold04357 | 1    | 1084 | 1084 | 27.11 | C_unshiu_02420 | 24324  | 25407  | 1084 | 4.03  | 100   |
| scaffold04358 | 1    | 1298 | 1298 | 32.47 | C_unshiu_00045 | 502124 | 500820 | 1305 | 0.2   | 99.31 |
| scaffold04360 | 2754 | 3996 | 1243 | 31.11 | C_unshiu_00669 | 36606  | 37849  | 1244 | 0.82  | 99.04 |
| scaffold04361 | 1    | 1086 | 1086 | 27.18 | C_unshiu_01425 | 60617  | 59532  | 1086 | 1.58  | 100   |
| scaffold04365 | 2361 | 3983 | 1623 | 40.75 | C_unshiu_00765 | 97704  | 99325  | 1622 | 1.21  | 99.51 |
| scaffold04369 | 207  | 1588 | 1382 | 34.69 | C_unshiu_03066 | 3981   | 5353   | 1373 | 12.84 | 98.77 |
| scaffold04375 | 48   | 3978 | 3931 | 98.82 | C_unshiu_00236 | 31644  | 35599  | 3956 | 1.3   | 99.24 |
| scaffold04376 | 1896 | 2999 | 1104 | 27.75 | C_unshiu_00849 | 25425  | 26528  | 1104 | 0.9   | 100   |
| scaffold04379 | 1    | 3974 | 3974 | 100   | C_unshiu_00472 | 40954  | 44929  | 3976 | 1.98  | 99.92 |
| scaffold04382 | 1    | 1169 | 1169 | 29.5  | C_unshiu_00308 | 85818  | 87004  | 1187 | 0.45  | 98.06 |
| scaffold04383 | 2265 | 3888 | 1624 | 41.05 | C_unshiu_00582 | 140463 | 138839 | 1625 | 0.95  | 99.02 |
| scaffold04385 | 2878 | 3962 | 1085 | 27.39 | C_unshiu_00708 | 131019 | 132103 | 1085 | 0.76  | 99.17 |
| scaffold04387 | 1    | 1094 | 1094 | 27.59 | C_unshiu_00257 | 135425 | 134328 | 1098 | 0.38  | 99.54 |
| scaffold04388 | 1    | 3963 | 3963 | 100   | C_unshiu_00408 | 100663 | 96702  | 3962 | 1.79  | 99.32 |
| scaffold04390 | 2209 | 3960 | 1752 | 44.24 | C_unshiu_02231 | 17768  | 16017  | 1752 | 5.43  | 100   |
| scaffold04394 | 1    | 1948 | 1948 | 49.24 | C_unshiu_01812 | 16331  | 14398  | 1934 | 4.02  | 99.28 |
| scaffold04394 | 2390 | 3956 | 1567 | 39.61 | C_unshiu_01812 | 13055  | 11486  | 1570 | 3.26  | 98.79 |
| scaffold04397 | 1    | 1131 | 1131 | 28.63 | C_unshiu_00585 | 68868  | 67737  | 1132 | 0.66  | 99.29 |
| scaffold04402 | 1174 | 3944 | 2771 | 70.26 | C_unshiu_01774 | 10395  | 13175  | 2781 | 5.62  | 98.17 |
| scaffold04403 | 1    | 3943 | 3943 | 100   | C_unshiu_01232 | 4178   | 8111   | 3934 | 4.79  | 99.26 |
| scaffold04404 | 1    | 1039 | 1039 | 26.35 | C_unshiu_01461 | 39651  | 38613  | 1039 | 1.58  | 100   |
| scaffold04405 | 1    | 3943 | 3943 | 100   | C_unshiu_01402 | 19950  | 23883  | 3934 | 5.6   | 98.66 |
| scaffold04406 | 1    | 1850 | 1850 | 46.93 | C_unshiu_00533 | 60612  | 58769  | 1844 | 1.01  | 99.62 |
| scaffold04407 | 1    | 3939 | 3939 | 100   | C_unshiu_00754 | 48009  | 44011  | 3999 | 2.95  | 98.2  |
| scaffold04408 | 1    | 1193 | 1193 | 30.29 | C_unshiu_00183 | 248789 | 247597 | 1193 | 0.34  | 99.16 |
| scaffold04410 | 1    | 3935 | 3935 | 100   | C_unshiu_01397 | 41376  | 45331  | 3956 | 5.61  | 98.36 |
| scaffold04411 | 2668 | 3803 | 1136 | 28.88 | C_unshiu_01878 | 26252  | 25117  | 1136 | 2.5   | 99.21 |
| scaffold04413 | 2886 | 3932 | 1047 | 26.63 | C_unshiu_01050 | 77933  | 76888  | 1046 | 1.05  | 98.66 |
| scaffold04418 | 1    | 3931 | 3931 | 100   | C_unshiu_00102 | 192549 | 188614 | 3936 | 0.87  | 99.26 |
| scaffold04419 | 4    | 1008 | 1005 | 25.57 | C_unshiu_00028 | 499522 | 500526 | 1005 | 0.14  | 100   |
| scaffold04420 | 256  | 3931 | 3676 | 93.51 | C_unshiu_00003 | 293821 | 297529 | 3709 | 0.28  | 98.79 |

|               |      |      |      |       |                |        |        |      |       |       |
|---------------|------|------|------|-------|----------------|--------|--------|------|-------|-------|
| scaffold04422 | 1    | 1632 | 1632 | 41.57 | C_unshiu_01105 | 2919   | 1271   | 1649 | 1.72  | 98.85 |
| scaffold04423 | 1    | 1177 | 1177 | 29.97 | C_unshiu_01431 | 64207  | 63031  | 1177 | 1.72  | 100   |
| scaffold04423 | 1    | 1177 | 1177 | 29.97 | C_unshiu_02881 | 10988  | 9808   | 1181 | 7.31  | 99.49 |
| scaffold04423 | 1273 | 3927 | 2655 | 67.61 | C_unshiu_02881 | 9674   | 7020   | 2655 | 16.42 | 99.7  |
| scaffold04424 | 2626 | 3858 | 1233 | 31.41 | C_unshiu_00454 | 9675   | 10909  | 1235 | 0.6   | 99.43 |
| scaffold04425 | 1    | 1532 | 1532 | 39.01 | C_unshiu_00975 | 2679   | 1148   | 1532 | 1.41  | 100   |
| scaffold04425 | 2143 | 3926 | 1784 | 45.44 | C_unshiu_00033 | 446286 | 444503 | 1784 | 0.25  | 99.83 |
| scaffold04427 | 2594 | 3899 | 1306 | 33.5  | C_unshiu_00305 | 15984  | 17294  | 1311 | 0.5   | 98.93 |
| scaffold04428 | 1    | 1444 | 1444 | 36.79 | C_unshiu_00402 | 104859 | 106305 | 1447 | 0.65  | 98.9  |
| scaffold04429 | 1    | 1531 | 1531 | 39.01 | C_unshiu_00041 | 182204 | 180674 | 1531 | 0.23  | 99.74 |
| scaffold04431 | 1    | 1344 | 1344 | 34.28 | C_unshiu_00179 | 357942 | 359291 | 1350 | 0.38  | 98.22 |
| scaffold04433 | 1    | 1184 | 1184 | 30.23 | C_unshiu_01012 | 93268  | 94452  | 1185 | 1.13  | 98.74 |
| scaffold04433 | 2691 | 3916 | 1226 | 31.31 | C_unshiu_01012 | 96014  | 97239  | 1226 | 1.17  | 100   |
| scaffold04434 | 731  | 2976 | 2246 | 57.37 | C_unshiu_01136 | 45933  | 48178  | 2246 | 2.43  | 100   |
| scaffold04439 | 393  | 3898 | 3506 | 89.94 | C_unshiu_00146 | 143150 | 146661 | 3512 | 0.9   | 98.16 |
| scaffold04440 | 1    | 3908 | 3908 | 100   | C_unshiu_00255 | 17014  | 13104  | 3911 | 1.33  | 99.82 |
| scaffold04443 | 2835 | 3915 | 1081 | 27.61 | C_unshiu_00670 | 124299 | 125379 | 1081 | 0.71  | 98.61 |
| scaffold04450 | 1    | 1094 | 1094 | 28.11 | C_unshiu_00008 | 722805 | 723899 | 1095 | 0.1   | 99.36 |
| scaffold04451 | 81   | 2022 | 1942 | 49.99 | C_unshiu_00852 | 31344  | 33278  | 1935 | 1.58  | 98.72 |
| scaffold04452 | 2888 | 3889 | 1002 | 25.76 | C_unshiu_00446 | 42096  | 41095  | 1002 | 0.48  | 99.9  |
| scaffold04455 | 1    | 3891 | 3891 | 100   | C_unshiu_00111 | 317307 | 313417 | 3891 | 0.89  | 99.95 |
| scaffold04457 | 2576 | 3890 | 1315 | 33.8  | C_unshiu_00492 | 191257 | 192574 | 1318 | 0.68  | 99.24 |
| scaffold04459 | 1    | 2450 | 2450 | 63.77 | C_unshiu_00026 | 188346 | 190793 | 2448 | 0.32  | 98.54 |
| scaffold04461 | 1    | 3903 | 3903 | 100   | C_unshiu_00475 | 7477   | 11388  | 3912 | 1.95  | 98.78 |
| scaffold04462 | 920  | 2854 | 1935 | 49.82 | C_unshiu_00711 | 94152  | 96086  | 1935 | 1.36  | 100   |
| scaffold04463 | 49   | 3882 | 3834 | 98.76 | C_unshiu_00800 | 27430  | 23608  | 3823 | 2.98  | 98.73 |
| scaffold04473 | 1    | 1431 | 1431 | 37.03 | C_unshiu_02344 | 9914   | 11361  | 1448 | 5.09  | 98.41 |
| scaffold04473 | 2015 | 3571 | 1557 | 40.3  | C_unshiu_02344 | 11608  | 13164  | 1557 | 5.47  | 100   |
| scaffold04474 | 2    | 3861 | 3860 | 99.97 | C_unshiu_00030 | 705700 | 701836 | 3865 | 0.54  | 99.69 |
| scaffold04475 | 1    | 1052 | 1052 | 27.27 | C_unshiu_00257 | 231667 | 230616 | 1052 | 0.36  | 100   |
| scaffold04475 | 2526 | 3858 | 1333 | 34.55 | C_unshiu_00257 | 229282 | 227950 | 1333 | 0.46  | 100   |
| scaffold04480 | 2003 | 3023 | 1021 | 26.48 | C_unshiu_00266 | 153757 | 152737 | 1021 | 0.36  | 100   |
| scaffold04481 | 2495 | 3854 | 1360 | 35.28 | C_unshiu_00915 | 4830   | 6189   | 1360 | 1.18  | 99.85 |
| scaffold04485 | 1097 | 3788 | 2692 | 69.92 | C_unshiu_02375 | 27780  | 25091  | 2690 | 9.68  | 98.92 |
| scaffold04488 | 2494 | 3847 | 1354 | 35.2  | C_unshiu_00435 | 151094 | 152447 | 1354 | 0.63  | 99.41 |
| scaffold04490 | 1508 | 3808 | 2301 | 60.43 | C_unshiu_02150 | 22869  | 20544  | 2326 | 6.63  | 98.16 |
| scaffold04491 | 2549 | 3841 | 1293 | 33.66 | C_unshiu_00356 | 200819 | 202111 | 1293 | 0.54  | 100   |
| scaffold04492 | 1    | 3839 | 3839 | 100   | C_unshiu_02459 | 12489  | 8667   | 3823 | 14.78 | 98.23 |
| scaffold04493 | 1237 | 2921 | 1685 | 43.88 | C_unshiu_01820 | 42644  | 40960  | 1685 | 3.52  | 99.94 |
| scaffold04497 | 1    | 1003 | 1003 | 26.15 | C_unshiu_00942 | 1501   | 2503   | 1003 | 0.89  | 100   |
| scaffold04498 | 1    | 3833 | 3833 | 100   | C_unshiu_00821 | 109051 | 105219 | 3833 | 3.04  | 100   |
| scaffold04499 | 1    | 3840 | 3840 | 100   | C_unshiu_02807 | 12341  | 16187  | 3847 | 21.69 | 99.56 |
| scaffold04500 | 1    | 2250 | 2250 | 59.24 | C_unshiu_00158 | 71685  | 73919  | 2235 | 0.6   | 98.93 |
| scaffold04501 | 360  | 2501 | 2142 | 55.93 | C_unshiu_00066 | 146845 | 148992 | 2148 | 0.39  | 98.24 |
| scaffold04504 | 1    | 2883 | 2883 | 75.61 | C_unshiu_01029 | 40091  | 37198  | 2894 | 2.81  | 98.31 |
| scaffold04507 | 1    | 3816 | 3816 | 100   | C_unshiu_01237 | 55530  | 59345  | 3816 | 4.66  | 99.66 |
| scaffold04511 | 1    | 3717 | 3717 | 97.53 | C_unshiu_02229 | 23703  | 19985  | 3719 | 11.5  | 99.76 |
| scaffold04512 | 682  | 3080 | 2399 | 63    | C_unshiu_00573 | 90847  | 88449  | 2399 | 1.39  | 100   |
| scaffold04515 | 1    | 3804 | 3804 | 100   | C_unshiu_00195 | 269225 | 273025 | 3801 | 1.12  | 98.69 |
| scaffold04516 | 1286 | 3718 | 2433 | 64.04 | C_unshiu_00467 | 137210 | 134777 | 2434 | 1.2   | 99.84 |
| scaffold04517 | 1634 | 3798 | 2165 | 57    | C_unshiu_02437 | 15181  | 13017  | 2165 | 8.17  | 100   |
| scaffold04518 | 1    | 1203 | 1203 | 31.68 | C_unshiu_00137 | 202031 | 203233 | 1203 | 0.3   | 100   |
| scaffold04522 | 1    | 2471 | 2471 | 65.28 | C_unshiu_00701 | 85204  | 82719  | 2486 | 1.73  | 98.63 |
| scaffold04524 | 1    | 3698 | 3698 | 97.57 | C_unshiu_01365 | 55280  | 58983  | 3704 | 5.05  | 99.03 |
| scaffold04525 | 1438 | 3790 | 2353 | 62.08 | C_unshiu_00135 | 256979 | 259337 | 2359 | 0.58  | 99.58 |
| scaffold04529 | 2158 | 3785 | 1628 | 43.01 | C_unshiu_00419 | 168140 | 166513 | 1628 | 0.74  | 99.45 |
| scaffold04531 | 1    | 3779 | 3779 | 100   | C_unshiu_02650 | 15205  | 18983  | 3779 | 18.1  | 100   |
| scaffold04534 | 565  | 2163 | 1599 | 42.35 | C_unshiu_00460 | 52941  | 54563  | 1623 | 0.79  | 98.15 |
| scaffold04536 | 1    | 3775 | 3775 | 100   | C_unshiu_00053 | 225521 | 221730 | 3792 | 0.63  | 99.18 |
| scaffold04536 | 1    | 3771 | 3771 | 99.89 | C_unshiu_00053 | 250912 | 247143 | 3770 | 0.63  | 99.44 |
| scaffold04539 | 496  | 3705 | 3210 | 85.06 | C_unshiu_01065 | 46091  | 49291  | 3201 | 3.23  | 98.91 |
| scaffold04545 | 1    | 3204 | 3204 | 85.14 | C_unshiu_00510 | 3632   | 428    | 3205 | 1.7   | 98.94 |
| scaffold04547 | 1584 | 3640 | 2057 | 54.74 | C_unshiu_00078 | 480932 | 482990 | 2059 | 0.41  | 98.6  |
| scaffold04548 | 1    | 1630 | 1630 | 43.37 | C_unshiu_00288 | 213026 | 211394 | 1633 | 0.6   | 99.2  |
| scaffold04548 | 2050 | 3758 | 1709 | 45.48 | C_unshiu_00288 | 210687 | 208972 | 1716 | 0.63  | 98.6  |
| scaffold04549 | 2128 | 3762 | 1635 | 43.46 | C_unshiu_00305 | 83227  | 81592  | 1636 | 0.62  | 99.76 |
| scaffold04555 | 1    | 1464 | 1464 | 39.11 | C_unshiu_00397 | 26959  | 25496  | 1464 | 0.66  | 98.23 |
| scaffold04557 | 1    | 2746 | 2746 | 73.34 | C_unshiu_02517 | 1424   | 4193   | 2770 | 11.47 | 98.3  |
| scaffold04557 | 802  | 3744 | 2943 | 78.61 | C_unshiu_00061 | 406619 | 403673 | 2947 | 0.51  | 99.32 |
| scaffold04558 | 1    | 1765 | 1765 | 47.18 | C_unshiu_00333 | 125298 | 123533 | 1766 | 0.7   | 98.19 |
| scaffold04561 | 639  | 1959 | 1321 | 35.45 | C_unshiu_01571 | 8168   | 6852   | 1317 | 2.23  | 98.49 |
| scaffold04562 | 1    | 3736 | 3736 | 100   | C_unshiu_00962 | 35232  | 39006  | 3775 | 3.42  | 98.12 |
| scaffold04564 | 2667 | 3729 | 1063 | 28.51 | C_unshiu_00028 | 633875 | 632812 | 1064 | 0.15  | 98.68 |
| scaffold04565 | 1    | 1273 | 1273 | 34.17 | C_unshiu_01198 | 8316   | 9588   | 1273 | 1.48  | 99.14 |
| scaffold04570 | 1    | 3722 | 3722 | 100   | C_unshiu_00117 | 66067  | 69811  | 3745 | 0.87  | 98.35 |
| scaffold04572 | 1161 | 3711 | 2551 | 68.74 | C_unshiu_00409 | 37762  | 40313  | 2552 | 1.15  | 99.37 |
| scaffold04575 | 1599 | 3665 | 2067 | 56.4  | C_unshiu_01035 | 38771  | 40831  | 2061 | 2.01  | 98.32 |
| scaffold04584 | 9    | 1033 | 1025 | 27.64 | C_unshiu_02603 | 14780  | 15803  | 1024 | 4.66  | 99.51 |
| scaffold04585 | 2633 | 3710 | 1078 | 29.06 | C_unshiu_02716 | 757    | 1834   | 1078 | 5.51  | 100   |

|               |      |      |      |       |                |         |         |      |       |       |
|---------------|------|------|------|-------|----------------|---------|---------|------|-------|-------|
| scaffold04587 | 1    | 2915 | 2915 | 78.85 | C_unshiu_00577 | 16954   | 19876   | 2923 | 1.7   | 99.38 |
| scaffold04590 | 1    | 2462 | 2462 | 66.72 | C_unshiu_00690 | 122006  | 119560  | 2447 | 1.68  | 98.5  |
| scaffold04591 | 2398 | 3686 | 1289 | 34.97 | C_unshiu_01051 | 58799   | 60087   | 1289 | 1.29  | 99.77 |
| scaffold04595 | 560  | 1812 | 1253 | 34.15 | C_unshiu_00001 | 1858952 | 1857700 | 1253 | 0.05  | 100   |
| scaffold04597 | 2021 | 3075 | 1055 | 28.68 | C_unshiu_00134 | 201552  | 200493  | 1060 | 0.26  | 98.12 |
| scaffold04598 | 924  | 3679 | 2756 | 74.91 | C_unshiu_00025 | 271681  | 274419  | 2739 | 0.36  | 99.35 |
| scaffold04600 | 142  | 3393 | 3252 | 88.56 | C_unshiu_00754 | 54892   | 51647   | 3246 | 2.39  | 98.34 |
| scaffold04602 | 2057 | 3672 | 1616 | 44.01 | C_unshiu_01306 | 73398   | 71785   | 1614 | 2.11  | 99.57 |
| scaffold04605 | 1    | 1916 | 1916 | 52.28 | C_unshiu_02152 | 16505   | 18454   | 1950 | 5.57  | 98.1  |
| scaffold04606 | 1    | 1385 | 1385 | 37.81 | C_unshiu_00095 | 230448  | 231832  | 1385 | 0.3   | 98.92 |
| scaffold04615 | 2390 | 3646 | 1257 | 34.48 | C_unshiu_00212 | 23792   | 25043   | 1252 | 0.38  | 98.89 |
| scaffold04620 | 1    | 3639 | 3639 | 100   | C_unshiu_00844 | 11117   | 7478    | 3640 | 2.96  | 99.37 |
| scaffold04621 | 1    | 2831 | 2831 | 77.92 | C_unshiu_02553 | 20342   | 23156   | 2815 | 12.16 | 99.12 |
| scaffold04623 | 1902 | 3627 | 1726 | 47.59 | C_unshiu_00238 | 46620   | 48343   | 1724 | 0.57  | 99.31 |
| scaffold04624 | 1    | 3629 | 3629 | 100   | C_unshiu_02149 | 15538   | 11910   | 3629 | 10.32 | 99.92 |
| scaffold04633 | 1562 | 2740 | 1179 | 33.01 | C_unshiu_00843 | 51606   | 50424   | 1183 | 0.96  | 98.31 |
| scaffold04640 | 1    | 1588 | 1588 | 44.1  | C_unshiu_01474 | 3405    | 4998    | 1594 | 2.46  | 98.49 |
| scaffold04640 | 1599 | 3601 | 2003 | 55.62 | C_unshiu_01474 | 5951    | 7953    | 2003 | 3.09  | 99.95 |
| scaffold04642 | 1    | 3583 | 3583 | 100   | C_unshiu_00867 | 98610   | 102193  | 3584 | 2.97  | 99.94 |
| scaffold04643 | 1    | 3235 | 3235 | 90.39 | C_unshiu_00431 | 162656  | 159425  | 3232 | 1.51  | 98.76 |
| scaffold04644 | 1    | 3575 | 3575 | 100   | C_unshiu_00231 | 255900  | 252338  | 3563 | 1.16  | 98.02 |
| scaffold04647 | 1    | 1372 | 1372 | 38.44 | C_unshiu_00217 | 225170  | 226541  | 1372 | 0.43  | 100   |
| scaffold04650 | 10   | 3568 | 3559 | 99.75 | C_unshiu_00279 | 151670  | 148119  | 3552 | 1.28  | 98.6  |
| scaffold04653 | 1    | 1265 | 1265 | 35.49 | C_unshiu_01262 | 31350   | 32614   | 1265 | 1.58  | 100   |
| scaffold04653 | 2435 | 3564 | 1130 | 31.71 | C_unshiu_01262 | 34257   | 35386   | 1130 | 1.41  | 100   |
| scaffold04655 | 1    | 1403 | 1403 | 39.39 | C_unshiu_00375 | 16725   | 18126   | 1402 | 0.61  | 98.72 |
| scaffold04655 | 1403 | 2409 | 1007 | 28.27 | C_unshiu_00375 | 18337   | 19344   | 1008 | 0.44  | 98.21 |
| scaffold04658 | 542  | 2976 | 2435 | 68.46 | C_unshiu_01054 | 77184   | 74750   | 2435 | 2.44  | 100   |
| scaffold04662 | 1    | 1231 | 1231 | 34.67 | C_unshiu_00938 | 69068   | 70298   | 1231 | 1.09  | 99.11 |
| scaffold04662 | 1553 | 3551 | 1999 | 56.29 | C_unshiu_00938 | 73698   | 75696   | 1999 | 1.77  | 99.5  |
| scaffold04663 | 1    | 3551 | 3551 | 100   | C_unshiu_01469 | 52728   | 56278   | 3551 | 5.42  | 100   |
| scaffold04665 | 1    | 2770 | 2770 | 78.05 | C_unshiu_00594 | 33288   | 36047   | 2760 | 1.64  | 98.59 |
| scaffold04667 | 548  | 2031 | 1484 | 41.91 | C_unshiu_01804 | 34653   | 33169   | 1485 | 3.07  | 99.13 |
| scaffold04667 | 2229 | 3232 | 1004 | 28.35 | C_unshiu_01804 | 33181   | 32177   | 1005 | 2.08  | 99.6  |
| scaffold04670 | 1    | 1241 | 1241 | 35.09 | C_unshiu_00301 | 165504  | 166748  | 1245 | 0.47  | 99.52 |
| scaffold04671 | 1    | 3537 | 3537 | 100   | C_unshiu_01345 | 58489   | 54953   | 3537 | 4.76  | 100   |
| scaffold04673 | 223  | 3535 | 3313 | 93.72 | C_unshiu_00043 | 80733   | 84027   | 3295 | 0.52  | 98.67 |
| scaffold04677 | 1    | 3516 | 3516 | 100   | C_unshiu_01420 | 58318   | 61833   | 3516 | 5.06  | 100   |
| scaffold04679 | 1    | 3515 | 3515 | 100   | C_unshiu_01983 | 12457   | 8943    | 3515 | 8.54  | 100   |
| scaffold04681 | 1    | 3508 | 3508 | 100   | C_unshiu_00301 | 59169   | 62676   | 3508 | 1.32  | 100   |
| scaffold04682 | 1    | 2770 | 2770 | 78.98 | C_unshiu_02756 | 14125   | 16899   | 2775 | 14.65 | 99.6  |
| scaffold04684 | 1    | 3485 | 3485 | 99.49 | C_unshiu_00084 | 163681  | 167172  | 3492 | 0.74  | 99.77 |
| scaffold04685 | 1    | 3501 | 3501 | 100   | C_unshiu_00372 | 173970  | 170467  | 3504 | 1.51  | 99.86 |
| scaffold04687 | 1    | 3501 | 3501 | 100   | C_unshiu_00901 | 10474   | 6976    | 3499 | 2.99  | 99.43 |
| scaffold04688 | 1    | 3498 | 3498 | 100   | C_unshiu_00453 | 193692  | 197187  | 3496 | 1.69  | 98.8  |
| scaffold04695 | 1    | 1565 | 1565 | 44.87 | C_unshiu_00408 | 14255   | 12691   | 1565 | 0.71  | 98.34 |
| scaffold04696 | 1    | 1120 | 1120 | 32.13 | C_unshiu_00061 | 379273  | 380392  | 1120 | 0.19  | 99.82 |
| scaffold04701 | 1    | 1525 | 1525 | 43.85 | C_unshiu_01453 | 38712   | 37188   | 1525 | 2.3   | 99.93 |
| scaffold04701 | 1525 | 2559 | 1035 | 29.76 | C_unshiu_01640 | 12819   | 13853   | 1035 | 1.86  | 100   |
| scaffold04703 | 1    | 1289 | 1289 | 37.09 | C_unshiu_01197 | 36549   | 35259   | 1291 | 1.5   | 99.07 |
| scaffold04705 | 1    | 3475 | 3475 | 100   | C_unshiu_00223 | 92040   | 95542   | 3503 | 1.12  | 98.49 |
| scaffold04707 | 1658 | 3125 | 1468 | 42.32 | C_unshiu_00004 | 127710  | 129189  | 1480 | 0.13  | 98.72 |
| scaffold04708 | 298  | 1900 | 1603 | 46.21 | C_unshiu_00538 | 100992  | 102594  | 1603 | 0.88  | 98.63 |
| scaffold04712 | 1    | 1896 | 1896 | 54.69 | C_unshiu_00237 | 253091  | 254988  | 1898 | 0.63  | 98.95 |
| scaffold04713 | 1    | 3407 | 3407 | 98.58 | C_unshiu_00257 | 150748  | 154150  | 3403 | 1.17  | 98.62 |
| scaffold04716 | 2373 | 3450 | 1078 | 31.25 | C_unshiu_00662 | 148594  | 147513  | 1082 | 0.71  | 98.62 |
| scaffold04717 | 1    | 1806 | 1806 | 52.27 | C_unshiu_00904 | 2419    | 614     | 1806 | 1.55  | 100   |
| scaffold04719 | 1    | 3438 | 3438 | 100   | C_unshiu_00123 | 242957  | 239545  | 3413 | 0.81  | 98.64 |
| scaffold04720 | 1    | 3445 | 3445 | 100   | C_unshiu_00472 | 73915   | 70467   | 3449 | 1.72  | 99.8  |
| scaffold04722 | 1    | 1832 | 1832 | 53.32 | C_unshiu_00230 | 9134    | 7298    | 1837 | 0.59  | 99.73 |
| scaffold04722 | 1833 | 3436 | 1604 | 46.68 | C_unshiu_00230 | 7364    | 5761    | 1604 | 0.52  | 100   |
| scaffold04724 | 1    | 3432 | 3432 | 100   | C_unshiu_01255 | 30945   | 34377   | 3433 | 4.26  | 99.71 |
| scaffold04725 | 580  | 3431 | 2852 | 83.12 | C_unshiu_00418 | 206639  | 209477  | 2839 | 1.29  | 98.32 |
| scaffold04727 | 1    | 3429 | 3429 | 100   | C_unshiu_00175 | 4149    | 7603    | 3455 | 0.95  | 98.93 |
| scaffold04729 | 2088 | 3426 | 1339 | 39.08 | C_unshiu_01897 | 2341    | 3678    | 1338 | 2.99  | 99.7  |
| scaffold04731 | 1    | 3425 | 3425 | 100   | C_unshiu_00277 | 116887  | 113468  | 3420 | 1.23  | 98.78 |
| scaffold04732 | 1    | 1327 | 1327 | 38.77 | C_unshiu_00528 | 69947   | 68620   | 1328 | 0.72  | 99.85 |
| scaffold04733 | 2395 | 3420 | 1026 | 30    | C_unshiu_01572 | 24250   | 23226   | 1025 | 1.74  | 99.81 |
| scaffold04734 | 12   | 1327 | 1316 | 38.49 | C_unshiu_00117 | 257861  | 256546  | 1316 | 0.3   | 99.24 |
| scaffold04735 | 1    | 3414 | 3414 | 100   | C_unshiu_00384 | 73624   | 77028   | 3405 | 1.5   | 99    |
| scaffold04736 | 1    | 2389 | 2389 | 69.96 | C_unshiu_01141 | 58551   | 60951   | 2401 | 2.62  | 98.88 |
| scaffold04736 | 2384 | 3415 | 1032 | 30.22 | C_unshiu_01141 | 62063   | 63095   | 1033 | 1.13  | 99.9  |
| scaffold04739 | 9    | 3384 | 3376 | 99.76 | C_unshiu_02302 | 5643    | 9010    | 3368 | 11.3  | 99.17 |
| scaffold04740 | 1    | 3406 | 3406 | 100   | C_unshiu_00152 | 361896  | 365309  | 3414 | 0.89  | 98.45 |
| scaffold04742 | 1344 | 2375 | 1032 | 30.32 | C_unshiu_00646 | 4123    | 5154    | 1032 | 0.65  | 99.32 |
| scaffold04742 | 2368 | 3404 | 1037 | 30.46 | C_unshiu_00646 | 5260    | 6296    | 1037 | 0.66  | 98.94 |
| scaffold04743 | 2087 | 3394 | 1308 | 38.54 | C_unshiu_00158 | 159130  | 160440  | 1311 | 0.35  | 98.86 |
| scaffold04745 | 804  | 2084 | 1281 | 37.7  | C_unshiu_01357 | 24910   | 26190   | 1281 | 1.74  | 100   |
| scaffold04746 | 1    | 1648 | 1648 | 48.47 | C_unshiu_00266 | 12515   | 10870   | 1646 | 0.58  | 99.58 |

|               |      |      |      |       |                |        |        |      |       |       |
|---------------|------|------|------|-------|----------------|--------|--------|------|-------|-------|
| scaffold04747 | 1175 | 2936 | 1762 | 51.84 | C_unshiu_00085 | 66401  | 68146  | 1746 | 0.37  | 98.41 |
| scaffold04748 | 1    | 1531 | 1531 | 45.1  | C_unshiu_00176 | 8868   | 10409  | 1542 | 0.43  | 98.77 |
| scaffold04748 | 1530 | 3020 | 1491 | 43.92 | C_unshiu_00176 | 10447  | 11946  | 1500 | 0.41  | 99.13 |
| scaffold04749 | 2181 | 3369 | 1189 | 35.01 | C_unshiu_00215 | 113217 | 114396 | 1180 | 0.37  | 98.32 |
| scaffold04753 | 1    | 2880 | 2880 | 84.98 | C_unshiu_00173 | 22523  | 25408  | 2886 | 0.79  | 99.31 |
| scaffold04756 | 619  | 2215 | 1597 | 47.15 | C_unshiu_00227 | 245415 | 243820 | 1596 | 0.52  | 99.25 |
| scaffold04763 | 1    | 3016 | 3016 | 89.23 | C_unshiu_02419 | 3004   | 1      | 3004 | 11.17 | 98.81 |
| scaffold04763 | 779  | 3380 | 2602 | 76.98 | C_unshiu_01996 | 23032  | 25632  | 2601 | 6.39  | 99.77 |
| scaffold04765 | 1    | 3371 | 3371 | 100   | C_unshiu_02435 | 8075   | 11443  | 3369 | 12.7  | 99.67 |
| scaffold04768 | 1    | 3372 | 3372 | 100   | C_unshiu_00393 | 146610 | 143239 | 3372 | 1.5   | 99.94 |
| scaffold04769 | 2    | 2264 | 2263 | 67.27 | C_unshiu_00047 | 528521 | 526263 | 2259 | 0.36  | 98.15 |
| scaffold04770 | 983  | 3359 | 2377 | 70.77 | C_unshiu_00724 | 71904  | 69517  | 2388 | 1.71  | 99.33 |
| scaffold04771 | 1    | 1673 | 1673 | 49.85 | C_unshiu_00963 | 68429  | 70109  | 1681 | 1.52  | 99.23 |
| scaffold04774 | 1    | 2037 | 2037 | 60.81 | C_unshiu_00620 | 101524 | 99486  | 2039 | 1.25  | 99.75 |
| scaffold04776 | 1    | 3339 | 3339 | 100   | C_unshiu_00125 | 69138  | 65809  | 3330 | 0.8   | 99.25 |
| scaffold04779 | 1    | 3340 | 3340 | 100   | C_unshiu_00016 | 4193   | 823    | 3371 | 0.39  | 98.46 |
| scaffold04780 | 875  | 2253 | 1379 | 41.29 | C_unshiu_00145 | 220131 | 218753 | 1379 | 0.35  | 100   |
| scaffold04780 | 2244 | 3340 | 1097 | 32.84 | C_unshiu_01825 | 28043  | 29139  | 1097 | 2.31  | 99    |
| scaffold04782 | 1    | 3339 | 3339 | 100   | C_unshiu_01511 | 38822  | 35485  | 3338 | 5.34  | 99.31 |
| scaffold04784 | 1    | 3149 | 3149 | 94.45 | C_unshiu_01523 | 52081  | 55243  | 3163 | 5.1   | 98.74 |
| scaffold04786 | 1    | 2255 | 2255 | 67.6  | C_unshiu_00034 | 688354 | 690609 | 2256 | 0.32  | 99.69 |
| scaffold04787 | 2331 | 3335 | 1005 | 30.13 | C_unshiu_00657 | 2245   | 1241   | 1005 | 0.65  | 99.7  |
| scaffold04793 | 1432 | 2670 | 1239 | 37.17 | C_unshiu_02057 | 3754   | 2522   | 1233 | 3.21  | 98.15 |
| scaffold04793 | 1448 | 2910 | 1463 | 43.89 | C_unshiu_00221 | 310346 | 311805 | 1460 | 0.46  | 98.5  |
| scaffold04794 | 228  | 2322 | 2095 | 63.03 | C_unshiu_00537 | 106500 | 104402 | 2099 | 1.15  | 98.34 |
| scaffold04798 | 26   | 3324 | 3299 | 99.25 | C_unshiu_00566 | 61037  | 64325  | 3289 | 1.88  | 99.39 |
| scaffold04800 | 1    | 2865 | 2865 | 86.32 | C_unshiu_00378 | 190494 | 187630 | 2865 | 1.24  | 99.83 |
| scaffold04801 | 1    | 1472 | 1472 | 44.35 | C_unshiu_00180 | 267537 | 266041 | 1497 | 0.42  | 98.33 |
| scaffold04806 | 1    | 3313 | 3313 | 100   | C_unshiu_00011 | 86384  | 83072  | 3313 | 0.34  | 99.22 |
| scaffold04814 | 1    | 3303 | 3303 | 100   | C_unshiu_02363 | 9968   | 13283  | 3316 | 11.84 | 98.77 |
| scaffold04815 | 1    | 3295 | 3295 | 100   | C_unshiu_00095 | 332183 | 328890 | 3294 | 0.71  | 99.36 |
| scaffold04816 | 1951 | 3293 | 1343 | 40.78 | C_unshiu_01302 | 61007  | 62349  | 1343 | 1.74  | 100   |
| scaffold04819 | 856  | 3297 | 2442 | 74.07 | C_unshiu_00147 | 343222 | 345663 | 2442 | 0.63  | 99.8  |
| scaffold04820 | 1    | 3282 | 3282 | 99.94 | C_unshiu_00541 | 7990   | 11275  | 3286 | 1.82  | 99.54 |
| scaffold04828 | 1    | 3272 | 3272 | 100   | C_unshiu_01937 | 18914  | 22179  | 3266 | 7.55  | 99.15 |
| scaffold04829 | 1    | 2756 | 2756 | 84.31 | C_unshiu_01647 | 22904  | 20129  | 2776 | 5.02  | 99.21 |
| scaffold04831 | 1    | 2176 | 2176 | 66.61 | C_unshiu_02870 | 6206   | 4031   | 2176 | 13.26 | 100   |
| scaffold04832 | 1    | 1796 | 1796 | 55.01 | C_unshiu_02234 | 2225   | 434    | 1792 | 5.58  | 99.72 |
| scaffold04837 | 1    | 1706 | 1706 | 52.35 | C_unshiu_00026 | 76142  | 77847  | 1706 | 0.23  | 99.06 |
| scaffold04837 | 1706 | 3259 | 1554 | 47.68 | C_unshiu_00026 | 74589  | 76142  | 1554 | 0.21  | 100   |
| scaffold04840 | 2078 | 3254 | 1177 | 36.17 | C_unshiu_00827 | 95360  | 96531  | 1172 | 0.93  | 98.98 |
| scaffold04841 | 1    | 2967 | 2967 | 91.4  | C_unshiu_00421 | 76676  | 73709  | 2968 | 1.36  | 99.73 |
| scaffold04841 | 2182 | 3246 | 1065 | 32.81 | C_unshiu_00739 | 20129  | 19065  | 1065 | 0.77  | 98.32 |
| scaffold04842 | 1    | 3246 | 3246 | 100   | C_unshiu_00562 | 58479  | 55233  | 3247 | 1.85  | 99.78 |
| scaffold04846 | 1    | 1063 | 1063 | 32.82 | C_unshiu_00378 | 50891  | 49827  | 1065 | 0.46  | 99.06 |
| scaffold04850 | 1    | 3230 | 3230 | 100   | C_unshiu_00001 | 628960 | 632196 | 3237 | 0.12  | 98.7  |
| scaffold04851 | 1    | 3228 | 3228 | 100   | C_unshiu_00767 | 51337  | 54564  | 3228 | 2.42  | 99.97 |
| scaffold04852 | 1    | 1147 | 1147 | 35.55 | C_unshiu_00429 | 23395  | 24541  | 1147 | 0.53  | 100   |
| scaffold04852 | 1912 | 3226 | 1315 | 40.76 | C_unshiu_00344 | 52571  | 51257  | 1315 | 0.53  | 100   |
| scaffold04854 | 15   | 3152 | 3138 | 99.56 | C_unshiu_01962 | 25080  | 28207  | 3128 | 7.4   | 98.06 |
| scaffold04856 | 1    | 3217 | 3217 | 100   | C_unshiu_00281 | 70329  | 67113  | 3217 | 1.16  | 99.94 |
| scaffold04863 | 1    | 2330 | 2330 | 72.68 | C_unshiu_01024 | 29251  | 26922  | 2330 | 2.25  | 99.79 |
| scaffold04869 | 1    | 2747 | 2747 | 86.52 | C_unshiu_00344 | 164178 | 166934 | 2757 | 1.11  | 99.64 |
| scaffold04870 | 1    | 3192 | 3192 | 100   | C_unshiu_00521 | 170580 | 173772 | 3193 | 1.72  | 99.94 |
| scaffold04872 | 1    | 1515 | 1515 | 47.4  | C_unshiu_00705 | 83547  | 82028  | 1520 | 1.06  | 99.34 |
| scaffold04874 | 5    | 3198 | 3194 | 99.87 | C_unshiu_00473 | 126911 | 123709 | 3203 | 1.59  | 98.88 |
| scaffold04875 | 385  | 2517 | 2133 | 66.91 | C_unshiu_00961 | 53131  | 55256  | 2126 | 1.92  | 98.08 |
| scaffold04883 | 1    | 2183 | 2183 | 68.58 | C_unshiu_00177 | 57809  | 59994  | 2186 | 0.61  | 98.17 |
| scaffold04885 | 3    | 3178 | 3176 | 99.94 | C_unshiu_02966 | 9620   | 6429   | 3192 | 22.91 | 99.12 |
| scaffold04888 | 10   | 2463 | 2454 | 77.93 | C_unshiu_00856 | 17209  | 14742  | 2468 | 2.02  | 98.47 |
| scaffold04890 | 1430 | 2506 | 1077 | 34.09 | C_unshiu_00236 | 42100  | 43182  | 1083 | 0.36  | 98.71 |
| scaffold04891 | 1    | 3155 | 3155 | 100   | C_unshiu_01015 | 39537  | 36373  | 3165 | 3.03  | 98.58 |
| scaffold04892 | 20   | 3134 | 3115 | 99.39 | C_unshiu_00425 | 20225  | 17109  | 3117 | 1.43  | 99.49 |
| scaffold04893 | 4    | 3149 | 3146 | 99.9  | C_unshiu_00212 | 309172 | 306024 | 3149 | 0.96  | 99.33 |
| scaffold04894 | 1    | 3153 | 3153 | 100   | C_unshiu_00310 | 179947 | 176795 | 3153 | 1.21  | 100   |
| scaffold04895 | 1    | 1095 | 1095 | 34.83 | C_unshiu_01572 | 7841   | 8936   | 1096 | 1.86  | 99.91 |
| scaffold04896 | 1    | 3148 | 3148 | 100   | C_unshiu_02482 | 11037  | 7895   | 3143 | 12.51 | 99.21 |
| scaffold04898 | 1    | 2496 | 2496 | 79.34 | C_unshiu_00458 | 108271 | 105775 | 2497 | 1.22  | 99.28 |
| scaffold04898 | 2    | 3146 | 3145 | 99.97 | C_unshiu_00453 | 117999 | 114855 | 3145 | 1.52  | 98.51 |
| scaffold04900 | 1    | 3143 | 3143 | 100   | C_unshiu_00065 | 520065 | 516922 | 3144 | 0.57  | 99.97 |
| scaffold04901 | 10   | 2337 | 2328 | 74.09 | C_unshiu_00399 | 122603 | 120275 | 2329 | 1.04  | 98.84 |
| scaffold04904 | 127  | 3136 | 3010 | 95.86 | C_unshiu_01421 | 62359  | 59378  | 2982 | 4.3   | 98.51 |
| scaffold04908 | 1    | 3133 | 3133 | 100   | C_unshiu_01000 | 80527  | 77399  | 3129 | 2.95  | 99.84 |
| scaffold04910 | 351  | 3117 | 2767 | 88.71 | C_unshiu_00591 | 141411 | 144158 | 2748 | 1.62  | 98.45 |
| scaffold04913 | 1    | 1892 | 1892 | 60.7  | C_unshiu_00821 | 21650  | 19759  | 1892 | 1.5   | 100   |
| scaffold04914 | 1175 | 3123 | 1949 | 62.41 | C_unshiu_00320 | 175122 | 173175 | 1948 | 0.76  | 99.85 |
| scaffold04915 | 260  | 2649 | 2390 | 76.53 | C_unshiu_00186 | 79527  | 81931  | 2405 | 0.69  | 98.55 |
| scaffold04917 | 1    | 1336 | 1336 | 42.9  | C_unshiu_00490 | 87000  | 88335  | 1336 | 0.68  | 99.85 |
| scaffold04917 | 1337 | 3114 | 1778 | 57.1  | C_unshiu_00490 | 89144  | 90944  | 1801 | 0.92  | 98.45 |

|               |      |      |      |       |                |        |        |      |       |       |
|---------------|------|------|------|-------|----------------|--------|--------|------|-------|-------|
| scaffold04925 | 1    | 3097 | 3097 | 100   | C_unshiu_00486 | 55416  | 52320  | 3097 | 1.57  | 100   |
| scaffold04926 | 1879 | 3099 | 1221 | 39.4  | C_unshiu_02532 | 14115  | 12894  | 1222 | 5.13  | 99.92 |
| scaffold04929 | 1144 | 3090 | 1947 | 63.01 | C_unshiu_00122 | 329824 | 331770 | 1947 | 0.46  | 99.9  |
| scaffold04930 | 1246 | 3092 | 1847 | 59.73 | C_unshiu_00092 | 295754 | 293908 | 1847 | 0.4   | 98.92 |
| scaffold04933 | 49   | 1689 | 1641 | 53.06 | C_unshiu_00697 | 70374  | 72022  | 1649 | 1.15  | 98.67 |
| scaffold04934 | 1    | 3027 | 3027 | 98.73 | C_unshiu_01488 | 46260  | 49273  | 3014 | 4.72  | 99.34 |
| scaffold04938 | 460  | 3078 | 2619 | 85.09 | C_unshiu_00059 | 107138 | 109757 | 2620 | 0.45  | 99.73 |
| scaffold04939 | 1    | 2065 | 2065 | 67.2  | C_unshiu_00519 | 21012  | 23076  | 2065 | 1.11  | 99.08 |
| scaffold04940 | 1    | 3069 | 3069 | 100   | C_unshiu_00083 | 459613 | 456538 | 3076 | 0.65  | 99.74 |
| scaffold04942 | 1007 | 3069 | 2063 | 67.22 | C_unshiu_00562 | 119577 | 121646 | 2070 | 1.18  | 98.21 |
| scaffold04947 | 875  | 3062 | 2188 | 71.46 | C_unshiu_00670 | 22209  | 24396  | 2188 | 1.44  | 99.41 |
| scaffold04951 | 1    | 1861 | 1861 | 60.66 | C_unshiu_00857 | 16578  | 18437  | 1860 | 1.52  | 99.84 |
| scaffold04952 | 1171 | 2566 | 1396 | 45.64 | C_unshiu_00537 | 156017 | 154629 | 1389 | 0.76  | 98.43 |
| scaffold04957 | 1    | 1056 | 1056 | 34.69 | C_unshiu_00061 | 357001 | 358065 | 1065 | 0.18  | 99.15 |
| scaffold04958 | 1    | 1411 | 1411 | 46.26 | C_unshiu_02858 | 10185  | 8775   | 1411 | 8.5   | 100   |
| scaffold04959 | 1671 | 2759 | 1089 | 35.65 | C_unshiu_00432 | 26610  | 27694  | 1085 | 0.51  | 98.62 |
| scaffold04960 | 1    | 3048 | 3048 | 100   | C_unshiu_01943 | 25584  | 28630  | 3047 | 7.09  | 99.02 |
| scaffold04962 | 1    | 2019 | 2019 | 66.2  | C_unshiu_00243 | 57466  | 55448  | 2019 | 0.67  | 99.01 |
| scaffold04971 | 4    | 3036 | 3033 | 99.9  | C_unshiu_01315 | 48837  | 45804  | 3034 | 4     | 98.19 |
| scaffold04972 | 1790 | 3034 | 1245 | 41.03 | C_unshiu_00038 | 221932 | 223188 | 1257 | 0.19  | 98.57 |
| scaffold04974 | 1    | 1043 | 1043 | 34.41 | C_unshiu_00353 | 163240 | 164282 | 1043 | 0.44  | 99.81 |
| scaffold04975 | 1211 | 3037 | 1827 | 60.16 | C_unshiu_00911 | 25274  | 23447  | 1828 | 1.58  | 99.95 |
| scaffold04979 | 364  | 3025 | 2662 | 88    | C_unshiu_01217 | 50517  | 47841  | 2677 | 3.19  | 98.62 |
| scaffold04981 | 1    | 1022 | 1022 | 33.86 | C_unshiu_00823 | 54310  | 53289  | 1022 | 0.81  | 99.8  |
| scaffold04985 | 1    | 1668 | 1668 | 55.34 | C_unshiu_00421 | 130953 | 129291 | 1663 | 0.76  | 99.34 |
| scaffold04988 | 814  | 3004 | 2191 | 72.94 | C_unshiu_00263 | 164826 | 167014 | 2189 | 0.77  | 98.13 |
| scaffold04989 | 1    | 1903 | 1903 | 63.31 | C_unshiu_00154 | 112683 | 114590 | 1908 | 0.5   | 98.43 |
| scaffold04999 | 1    | 2993 | 2993 | 99.97 | C_unshiu_00185 | 120017 | 117027 | 2991 | 0.86  | 99.33 |
| scaffold05007 | 1    | 1487 | 1487 | 49.87 | C_unshiu_00914 | 87452  | 85966  | 1487 | 1.29  | 100   |
| scaffold05008 | 159  | 2984 | 2826 | 94.71 | C_unshiu_00454 | 134431 | 131601 | 2831 | 1.37  | 98.66 |
| scaffold05012 | 1    | 2974 | 2974 | 100   | C_unshiu_00783 | 47134  | 44159  | 2976 | 2.28  | 99.03 |
| scaffold05015 | 1    | 1075 | 1075 | 36.27 | C_unshiu_01623 | 30133  | 31207  | 1075 | 1.9   | 98.98 |
| scaffold05018 | 1    | 2970 | 2970 | 100   | C_unshiu_02686 | 11874  | 8905   | 2970 | 14.71 | 98.79 |
| scaffold05020 | 288  | 2967 | 2680 | 90.33 | C_unshiu_01699 | 35313  | 37998  | 2686 | 5.11  | 99.03 |
| scaffold05023 | 1    | 2963 | 2963 | 100   | C_unshiu_00805 | 71798  | 68808  | 2991 | 2.34  | 98.66 |
| scaffold05025 | 1    | 1535 | 1535 | 51.82 | C_unshiu_02811 | 10175  | 11723  | 1549 | 8.78  | 98.97 |
| scaffold05028 | 1    | 2924 | 2924 | 98.85 | C_unshiu_01185 | 68387  | 65462  | 2926 | 3.36  | 99.93 |
| scaffold05029 | 1809 | 2960 | 1152 | 38.92 | C_unshiu_00257 | 164375 | 163218 | 1158 | 0.4   | 99.22 |
| scaffold05030 | 1    | 2766 | 2766 | 93.57 | C_unshiu_00449 | 164736 | 167519 | 2784 | 1.34  | 98.28 |
| scaffold05033 | 1554 | 2956 | 1403 | 47.46 | C_unshiu_00835 | 68144  | 66741  | 1404 | 1.13  | 99.86 |
| scaffold05040 | 1    | 1193 | 1193 | 40.84 | C_unshiu_00318 | 242407 | 241208 | 1200 | 0.47  | 99.25 |
| scaffold05041 | 1    | 2937 | 2937 | 100   | C_unshiu_00060 | 383259 | 380315 | 2945 | 0.51  | 99.08 |
| scaffold05046 | 1    | 2929 | 2929 | 100   | C_unshiu_00892 | 93816  | 96738  | 2923 | 2.48  | 98.74 |
| scaffold05047 | 538  | 2931 | 2394 | 81.68 | C_unshiu_00040 | 252398 | 250002 | 2397 | 0.36  | 99.58 |
| scaffold05049 | 1    | 2929 | 2929 | 100   | C_unshiu_00911 | 43599  | 46557  | 2959 | 2.55  | 98.28 |
| scaffold05050 | 1042 | 2384 | 1343 | 45.73 | C_unshiu_00285 | 50244  | 51576  | 1333 | 0.49  | 98.73 |
| scaffold05051 | 1015 | 2933 | 1919 | 65.43 | C_unshiu_01337 | 57341  | 59266  | 1926 | 2.58  | 98.03 |
| scaffold05054 | 1    | 2355 | 2355 | 80.6  | C_unshiu_01586 | 48756  | 51111  | 2356 | 4.04  | 99.96 |
| scaffold05054 | 516  | 2922 | 2407 | 82.38 | C_unshiu_00230 | 11622  | 14028  | 2407 | 0.78  | 100   |
| scaffold05056 | 1    | 2919 | 2919 | 100   | C_unshiu_01089 | 57169  | 54244  | 2926 | 3.01  | 98.77 |
| scaffold05058 | 338  | 1582 | 1245 | 42.68 | C_unshiu_00519 | 62449  | 63694  | 1246 | 0.67  | 98.4  |
| scaffold05060 | 1    | 2912 | 2912 | 100   | C_unshiu_00814 | 54363  | 51451  | 2913 | 2.29  | 99.35 |
| scaffold05062 | 1    | 1511 | 1511 | 52.1  | C_unshiu_00348 | 176722 | 178231 | 1510 | 0.61  | 99.74 |
| scaffold05064 | 1    | 2910 | 2910 | 100   | C_unshiu_00602 | 18788  | 15879  | 2910 | 1.74  | 99.86 |
| scaffold05066 | 636  | 2453 | 1818 | 62.73 | C_unshiu_00158 | 266978 | 265159 | 1820 | 0.49  | 99.07 |
| scaffold05068 | 1203 | 2603 | 1401 | 48.71 | C_unshiu_00361 | 171254 | 169851 | 1404 | 0.59  | 99.57 |
| scaffold05070 | 525  | 1593 | 1069 | 36.87 | C_unshiu_00438 | 136065 | 134993 | 1073 | 0.51  | 99.53 |
| scaffold05071 | 1    | 2514 | 2514 | 86.75 | C_unshiu_00216 | 288243 | 290757 | 2515 | 0.78  | 99.52 |
| scaffold05072 | 1    | 1169 | 1169 | 40.52 | C_unshiu_01254 | 10306  | 11476  | 1171 | 1.45  | 98.89 |
| scaffold05072 | 1169 | 2885 | 1717 | 59.51 | C_unshiu_01707 | 41475  | 39759  | 1717 | 3.29  | 100   |
| scaffold05074 | 1    | 2892 | 2892 | 100   | C_unshiu_00658 | 103912 | 101004 | 2909 | 1.89  | 99.17 |
| scaffold05076 | 1    | 2895 | 2895 | 100   | C_unshiu_01892 | 9007   | 11903  | 2897 | 6.44  | 99.86 |
| scaffold05079 | 3    | 1851 | 1849 | 63.76 | C_unshiu_00418 | 125486 | 127331 | 1846 | 0.84  | 99.19 |
| scaffold05082 | 1    | 2870 | 2870 | 99.9  | C_unshiu_02667 | 14354  | 11485  | 2870 | 13.95 | 98.96 |
| scaffold05085 | 1    | 2068 | 2068 | 71.78 | C_unshiu_00223 | 283204 | 285288 | 2085 | 0.66  | 98.37 |
| scaffold05089 | 1    | 1198 | 1198 | 41.64 | C_unshiu_00610 | 118027 | 116827 | 1201 | 0.73  | 99.58 |
| scaffold05091 | 1195 | 2841 | 1647 | 57.97 | C_unshiu_00427 | 194314 | 192667 | 1648 | 0.76  | 99.51 |
| scaffold05093 | 1    | 1424 | 1424 | 49.48 | C_unshiu_00930 | 29162  | 30585  | 1424 | 1.25  | 99.93 |
| scaffold05095 | 650  | 2872 | 2223 | 77.4  | C_unshiu_01032 | 10183  | 7964   | 2220 | 2.16  | 98.88 |
| scaffold05099 | 1792 | 2865 | 1074 | 37.49 | C_unshiu_00137 | 233675 | 234748 | 1074 | 0.27  | 99.91 |
| scaffold05115 | 1    | 2435 | 2435 | 85.44 | C_unshiu_00219 | 161304 | 163729 | 2426 | 0.77  | 99.55 |
| scaffold05116 | 1    | 2046 | 2046 | 71.81 | C_unshiu_02629 | 14967  | 17011  | 2045 | 9.52  | 99.46 |
| scaffold05118 | 3    | 2843 | 2841 | 99.93 | C_unshiu_01769 | 34969  | 32126  | 2844 | 5.73  | 98.53 |
| scaffold05119 | 1    | 1355 | 1355 | 47.61 | C_unshiu_00092 | 241375 | 242726 | 1352 | 0.29  | 99.26 |
| scaffold05121 | 649  | 2842 | 2194 | 77.2  | C_unshiu_01300 | 47551  | 49745  | 2195 | 2.84  | 98.31 |
| scaffold05126 | 1    | 2839 | 2839 | 100   | C_unshiu_00662 | 25060  | 22240  | 2821 | 1.84  | 98.87 |
| scaffold05128 | 1    | 1106 | 1106 | 38.97 | C_unshiu_00021 | 556275 | 555171 | 1105 | 0.14  | 99.64 |
| scaffold05131 | 876  | 2833 | 1958 | 69.11 | C_unshiu_00171 | 314809 | 316766 | 1958 | 0.53  | 100   |
| scaffold05138 | 301  | 1592 | 1292 | 45.72 | C_unshiu_00390 | 159638 | 158347 | 1292 | 0.57  | 99.23 |

|               |      |      |      |       |                |         |         |      |       |       |
|---------------|------|------|------|-------|----------------|---------|---------|------|-------|-------|
| scaffold05145 | 1    | 2815 | 2815 | 100   | C_unshiu_00016 | 723715  | 720902  | 2814 | 0.32  | 98.97 |
| scaffold05146 | 454  | 2814 | 2361 | 83.9  | C_unshiu_02755 | 862     | 3223    | 2362 | 12.46 | 99.45 |
| scaffold05147 | 989  | 2092 | 1104 | 39.25 | C_unshiu_00818 | 97105   | 98208   | 1104 | 0.87  | 99.64 |
| scaffold05150 | 264  | 1839 | 1576 | 56.09 | C_unshiu_01346 | 24164   | 25738   | 1575 | 2.12  | 98.23 |
| scaffold05152 | 1    | 1898 | 1898 | 67.59 | C_unshiu_01003 | 17073   | 18971   | 1899 | 1.8   | 98.74 |
| scaffold05153 | 1064 | 2796 | 1733 | 61.74 | C_unshiu_01929 | 4650    | 2920    | 1731 | 3.95  | 98.91 |
| scaffold05157 | 1    | 2805 | 2805 | 100   | C_unshiu_00671 | 139020  | 141824  | 2805 | 1.85  | 100   |
| scaffold05159 | 6    | 1786 | 1781 | 63.49 | C_unshiu_00963 | 58488   | 60276   | 1789 | 1.62  | 99.39 |
| scaffold05162 | 1    | 2802 | 2802 | 100   | C_unshiu_00221 | 50481   | 47656   | 2826 | 0.9   | 98.8  |
| scaffold05163 | 1    | 2149 | 2149 | 76.72 | C_unshiu_01255 | 47834   | 45687   | 2148 | 2.67  | 99.16 |
| scaffold05164 | 1144 | 2416 | 1273 | 45.46 | C_unshiu_00003 | 632667  | 633946  | 1280 | 0.1   | 98.67 |
| scaffold05165 | 1491 | 2800 | 1310 | 46.79 | C_unshiu_00223 | 275160  | 276470  | 1311 | 0.42  | 99.62 |
| scaffold05173 | 1    | 2749 | 2749 | 98.35 | C_unshiu_00958 | 44902   | 42130   | 2773 | 2.5   | 98.74 |
| scaffold05176 | 1    | 2776 | 2776 | 100   | C_unshiu_00095 | 415673  | 418422  | 2750 | 0.59  | 98.06 |
| scaffold05177 | 5    | 2788 | 2784 | 99.86 | C_unshiu_00588 | 24192   | 26988   | 2797 | 1.65  | 98.29 |
| scaffold05178 | 1    | 1152 | 1152 | 41.42 | C_unshiu_00764 | 28402   | 27248   | 1155 | 0.86  | 99.65 |
| scaffold05178 | 1763 | 2781 | 1019 | 36.64 | C_unshiu_00764 | 25293   | 24266   | 1028 | 0.76  | 98.05 |
| scaffold05179 | 1    | 2782 | 2782 | 100   | C_unshiu_00704 | 38880   | 36088   | 2793 | 1.95  | 99.03 |
| scaffold05180 | 157  | 2783 | 2627 | 94.39 | C_unshiu_00130 | 180794  | 183416  | 2623 | 0.64  | 98.94 |
| scaffold05182 | 413  | 2786 | 2374 | 85.18 | C_unshiu_00199 | 242994  | 240608  | 2387 | 0.71  | 98.49 |
| scaffold05183 | 1    | 2778 | 2778 | 100   | C_unshiu_00139 | 238652  | 241429  | 2778 | 0.69  | 99.93 |
| scaffold05184 | 1374 | 2777 | 1404 | 50.56 | C_unshiu_00778 | 48465   | 47054   | 1412 | 1.07  | 98.94 |
| scaffold05188 | 1    | 2755 | 2755 | 99.82 | C_unshiu_00328 | 26103   | 28826   | 2724 | 1.08  | 98.26 |
| scaffold05191 | 346  | 2196 | 1851 | 66.92 | C_unshiu_00025 | 115156  | 117012  | 1857 | 0.25  | 98.06 |
| scaffold05192 | 1    | 2768 | 2768 | 100   | C_unshiu_00395 | 156548  | 159315  | 2768 | 1.24  | 99.57 |
| scaffold05198 | 363  | 2764 | 2402 | 86.9  | C_unshiu_01826 | 26654   | 24250   | 2405 | 5.07  | 99    |
| scaffold05203 | 1    | 1686 | 1686 | 61.09 | C_unshiu_02588 | 17894   | 16216   | 1679 | 7.48  | 98.34 |
| scaffold05203 | 1692 | 2760 | 1069 | 38.73 | C_unshiu_00302 | 78833   | 79902   | 1070 | 0.4   | 99.72 |
| scaffold05205 | 1    | 2667 | 2667 | 96.77 | C_unshiu_01603 | 54694   | 57379   | 2686 | 4.68  | 98.4  |
| scaffold05205 | 206  | 2756 | 2551 | 92.56 | C_unshiu_01603 | 45449   | 42896   | 2554 | 4.45  | 99.37 |
| scaffold05208 | 1    | 2045 | 2045 | 74.26 | C_unshiu_01419 | 18501   | 20549   | 2049 | 2.95  | 98.58 |
| scaffold05214 | 1    | 2729 | 2729 | 100   | C_unshiu_02209 | 18940   | 21671   | 2732 | 8.3   | 98.87 |
| scaffold05217 | 1    | 2706 | 2706 | 99.05 | C_unshiu_00265 | 86377   | 83672   | 2706 | 0.95  | 99.7  |
| scaffold05219 | 17   | 2721 | 2705 | 99.41 | C_unshiu_01185 | 43641   | 40935   | 2707 | 3.11  | 99.89 |
| scaffold05220 | 1    | 1966 | 1966 | 72.07 | C_unshiu_01887 | 25992   | 24025   | 1968 | 4.36  | 99.7  |
| scaffold05221 | 1    | 2197 | 2197 | 80.56 | C_unshiu_01969 | 148     | 2344    | 2197 | 5.25  | 99.64 |
| scaffold05222 | 1    | 1141 | 1141 | 41.86 | C_unshiu_00157 | 205048  | 206184  | 1137 | 0.3   | 98.86 |
| scaffold05222 | 954  | 2726 | 1773 | 65.04 | C_unshiu_00157 | 206178  | 207944  | 1767 | 0.47  | 98.93 |
| scaffold05227 | 1    | 1637 | 1637 | 60.07 | C_unshiu_00414 | 143496  | 141860  | 1637 | 0.74  | 99.76 |
| scaffold05233 | 1    | 2717 | 2717 | 100   | C_unshiu_00506 | 38242   | 35521   | 2722 | 1.43  | 98.79 |
| scaffold05235 | 1    | 2715 | 2715 | 100   | C_unshiu_01993 | 134     | 2842    | 2709 | 6.63  | 99.26 |
| scaffold05240 | 1580 | 2711 | 1132 | 41.76 | C_unshiu_00703 | 26386   | 27516   | 1131 | 0.79  | 98.67 |
| scaffold05244 | 1    | 2700 | 2700 | 100   | C_unshiu_00135 | 102978  | 105686  | 2709 | 0.67  | 99.59 |
| scaffold05248 | 1    | 1101 | 1101 | 40.87 | C_unshiu_00444 | 135423  | 136528  | 1106 | 0.53  | 98.47 |
| scaffold05248 | 1331 | 2658 | 1328 | 49.29 | C_unshiu_00444 | 139510  | 140837  | 1328 | 0.63  | 99.77 |
| scaffold05251 | 1    | 2695 | 2695 | 100   | C_unshiu_00762 | 39526   | 36809   | 2718 | 2.02  | 98.86 |
| scaffold05254 | 258  | 2694 | 2437 | 90.46 | C_unshiu_00001 | 1821712 | 1824141 | 2430 | 0.09  | 98.85 |
| scaffold05257 | 1    | 2688 | 2688 | 100   | C_unshiu_01317 | 15      | 2715    | 2701 | 3.57  | 99.22 |
| scaffold05258 | 1    | 2276 | 2276 | 84.74 | C_unshiu_00651 | 14070   | 16345   | 2276 | 1.46  | 99.43 |
| scaffold05259 | 1    | 2666 | 2666 | 100   | C_unshiu_00350 | 179031  | 181697  | 2667 | 1.1   | 99.81 |
| scaffold05260 | 342  | 2682 | 2341 | 87.29 | C_unshiu_01425 | 22438   | 20088   | 2351 | 3.43  | 98.47 |
| scaffold05263 | 1    | 2680 | 2680 | 100   | C_unshiu_00235 | 8167    | 10837   | 2671 | 0.87  | 98.88 |
| scaffold05265 | 1663 | 2674 | 1012 | 37.85 | C_unshiu_00067 | 13142   | 12131   | 1012 | 0.19  | 100   |
| scaffold05266 | 5    | 1225 | 1221 | 45.68 | C_unshiu_01891 | 14396   | 15610   | 1215 | 2.7   | 98.03 |
| scaffold05269 | 1279 | 2297 | 1019 | 38.15 | C_unshiu_00484 | 92390   | 93408   | 1019 | 0.52  | 98.33 |
| scaffold05272 | 1    | 1135 | 1135 | 42.51 | C_unshiu_00255 | 198481  | 197345  | 1137 | 0.39  | 98.94 |
| scaffold05279 | 1    | 1793 | 1793 | 67.33 | C_unshiu_00407 | 181552  | 179760  | 1793 | 0.81  | 98.88 |
| scaffold05280 | 1    | 2099 | 2099 | 78.85 | C_unshiu_00959 | 23619   | 25717   | 2099 | 1.9   | 99.95 |
| scaffold05281 | 5    | 1601 | 1597 | 59.99 | C_unshiu_00347 | 33271   | 34867   | 1597 | 0.65  | 98.94 |
| scaffold05282 | 853  | 2267 | 1415 | 53.54 | C_unshiu_00083 | 59945   | 61361   | 1417 | 0.3   | 98.59 |
| scaffold05289 | 1311 | 2453 | 1143 | 42.97 | C_unshiu_00230 | 100779  | 101921  | 1143 | 0.37  | 100   |
| scaffold05293 | 1    | 2657 | 2657 | 100   | C_unshiu_00935 | 100352  | 97682   | 2671 | 2.36  | 98.39 |
| scaffold05294 | 582  | 1797 | 1216 | 46.03 | C_unshiu_00493 | 137897  | 139110  | 1214 | 0.62  | 98.11 |
| scaffold05296 | 1    | 1619 | 1619 | 60.93 | C_unshiu_01175 | 71721   | 70102   | 1620 | 1.84  | 99.81 |
| scaffold05297 | 1    | 2656 | 2656 | 100   | C_unshiu_00196 | 159961  | 157306  | 2656 | 0.78  | 100   |
| scaffold05299 | 1    | 2654 | 2654 | 100   | C_unshiu_01207 | 31330   | 28680   | 2651 | 3.13  | 99.62 |
| scaffold05301 | 1599 | 2651 | 1053 | 39.72 | C_unshiu_03050 | 3861    | 2810    | 1052 | 9.2   | 98.96 |
| scaffold05304 | 1    | 2357 | 2357 | 88.98 | C_unshiu_03014 | 10936   | 8587    | 2350 | 18.74 | 98.22 |
| scaffold05306 | 1    | 1012 | 1012 | 38.22 | C_unshiu_01428 | 53940   | 54952   | 1013 | 1.48  | 98.03 |
| scaffold05307 | 1    | 1224 | 1224 | 46.38 | C_unshiu_00247 | 290393  | 289169  | 1225 | 0.41  | 99.67 |
| scaffold05310 | 2    | 2641 | 2640 | 99.96 | C_unshiu_00143 | 44587   | 47246   | 2660 | 0.67  | 98.87 |
| scaffold05311 | 1    | 1958 | 1958 | 74.11 | C_unshiu_00213 | 230058  | 232015  | 1958 | 0.6   | 99.95 |
| scaffold05312 | 1    | 2639 | 2639 | 100   | C_unshiu_00195 | 314071  | 316709  | 2639 | 0.78  | 99.96 |
| scaffold05314 | 1    | 1261 | 1261 | 47.78 | C_unshiu_00195 | 121407  | 122667  | 1261 | 0.37  | 98.41 |
| scaffold05317 | 1    | 1459 | 1459 | 55.27 | C_unshiu_01082 | 89208   | 90666   | 1459 | 1.49  | 99.79 |
| scaffold05317 | 1455 | 2639 | 1185 | 44.89 | C_unshiu_01082 | 91842   | 90658   | 1185 | 1.21  | 100   |
| scaffold05319 | 1    | 2626 | 2626 | 100   | C_unshiu_00030 | 432098  | 434719  | 2622 | 0.37  | 98.9  |
| scaffold05321 | 1577 | 2631 | 1055 | 40.1  | C_unshiu_00158 | 37188   | 36132   | 1057 | 0.28  | 99.53 |
| scaffold05326 | 1    | 2628 | 2628 | 100   | C_unshiu_00839 | 110201  | 112828  | 2628 | 2.12  | 100   |

|               |      |      |      |       |                |        |        |      |       |       |
|---------------|------|------|------|-------|----------------|--------|--------|------|-------|-------|
| scaffold05328 | 1    | 2625 | 2625 | 100   | C_unshiu_01637 | 48429  | 45810  | 2620 | 4.71  | 98.52 |
| scaffold05330 | 1    | 2630 | 2630 | 99.92 | C_unshiu_00937 | 85261  | 82632  | 2630 | 2.33  | 98.71 |
| scaffold05332 | 1    | 2621 | 2621 | 100   | C_unshiu_01611 | 3085   | 460    | 2626 | 4.6   | 99.54 |
| scaffold05333 | 1363 | 2622 | 1260 | 48.05 | C_unshiu_00221 | 313106 | 311858 | 1249 | 0.4   | 98.81 |
| scaffold05335 | 1    | 1102 | 1102 | 42.05 | C_unshiu_00420 | 46175  | 45074  | 1102 | 0.5   | 99.91 |
| scaffold05338 | 1    | 2615 | 2615 | 100   | C_unshiu_00402 | 58325  | 60936  | 2612 | 1.18  | 98.55 |
| scaffold05344 | 1    | 2610 | 2610 | 100   | C_unshiu_02680 | 4228   | 1619   | 2610 | 12.86 | 100   |
| scaffold05346 | 882  | 2609 | 1728 | 66.23 | C_unshiu_01271 | 24859  | 26588  | 1730 | 2.18  | 99.31 |
| scaffold05347 | 1    | 2608 | 2608 | 100   | C_unshiu_00351 | 97417  | 94810  | 2608 | 1.09  | 100   |
| scaffold05349 | 1    | 2602 | 2602 | 100   | C_unshiu_01468 | 31715  | 34328  | 2614 | 3.99  | 99.54 |
| scaffold05350 | 1    | 2602 | 2602 | 100   | C_unshiu_00542 | 15863  | 13262  | 2602 | 1.45  | 99.92 |
| scaffold05351 | 1    | 1155 | 1155 | 44.35 | C_unshiu_00009 | 684980 | 686129 | 1150 | 0.11  | 98.44 |
| scaffold05356 | 1207 | 2582 | 1376 | 53.29 | C_unshiu_00463 | 108059 | 109434 | 1376 | 0.68  | 99.27 |
| scaffold05358 | 691  | 2593 | 1903 | 73.39 | C_unshiu_01408 | 61804  | 59902  | 1903 | 2.71  | 99.89 |
| scaffold05359 | 1    | 2593 | 2593 | 100   | C_unshiu_00627 | 151167 | 148574 | 2594 | 1.61  | 98.11 |
| scaffold05362 | 1    | 2587 | 2587 | 100   | C_unshiu_00832 | 25902  | 28488  | 2587 | 2.07  | 99.85 |
| scaffold05364 | 1    | 2584 | 2584 | 100   | C_unshiu_00711 | 136836 | 134253 | 2584 | 1.82  | 99.73 |
| scaffold05371 | 1    | 1609 | 1609 | 62.39 | C_unshiu_00007 | 884089 | 882484 | 1606 | 0.14  | 98.51 |
| scaffold05372 | 1    | 2578 | 2578 | 100   | C_unshiu_00025 | 648138 | 645553 | 2586 | 0.34  | 99.11 |
| scaffold05375 | 1    | 2578 | 2578 | 100   | C_unshiu_00128 | 228613 | 225994 | 2620 | 0.63  | 98.17 |
| scaffold05377 | 1331 | 2574 | 1244 | 48.33 | C_unshiu_00893 | 33139  | 31889  | 1251 | 1.06  | 98.48 |
| scaffold05380 | 1    | 2572 | 2572 | 100   | C_unshiu_00606 | 136524 | 133950 | 2575 | 1.56  | 99.42 |
| scaffold05381 | 1    | 1000 | 1000 | 38.9  | C_unshiu_00135 | 239569 | 240574 | 1006 | 0.25  | 99.3  |
| scaffold05381 | 1001 | 2322 | 1322 | 51.42 | C_unshiu_00086 | 206403 | 205078 | 1326 | 0.28  | 98.57 |
| scaffold05382 | 1    | 2571 | 2571 | 100   | C_unshiu_00633 | 107483 | 104913 | 2571 | 1.6   | 99.96 |
| scaffold05383 | 1    | 2571 | 2571 | 100   | C_unshiu_00276 | 21320  | 23893  | 2574 | 0.92  | 99.03 |
| scaffold05387 | 1    | 2566 | 2566 | 100   | C_unshiu_00583 | 146426 | 143855 | 2572 | 1.51  | 98.84 |
| scaffold05389 | 24   | 2563 | 2540 | 99.1  | C_unshiu_00455 | 133405 | 135942 | 2538 | 1.23  | 99.92 |
| scaffold05393 | 868  | 2561 | 1694 | 66.15 | C_unshiu_00056 | 355991 | 354290 | 1702 | 0.29  | 99.41 |
| scaffold05394 | 1    | 2559 | 2559 | 100   | C_unshiu_00092 | 262672 | 260108 | 2565 | 0.55  | 98.52 |
| scaffold05398 | 1247 | 2558 | 1312 | 51.29 | C_unshiu_02837 | 3961   | 2650   | 1312 | 7.73  | 100   |
| scaffold05399 | 1    | 2557 | 2557 | 100   | C_unshiu_01041 | 19974  | 17406  | 2569 | 2.52  | 98.52 |
| scaffold05400 | 1    | 2552 | 2552 | 100   | C_unshiu_00874 | 102533 | 105095 | 2563 | 2.14  | 99.45 |
| scaffold05403 | 1    | 2554 | 2554 | 100   | C_unshiu_01539 | 23995  | 26548  | 2554 | 4.18  | 99.92 |
| scaffold05406 | 1    | 2552 | 2552 | 100   | C_unshiu_01544 | 10444  | 7893   | 2552 | 4.19  | 99.3  |
| scaffold05407 | 1    | 1443 | 1443 | 56.57 | C_unshiu_00026 | 637887 | 636445 | 1443 | 0.19  | 99.86 |
| scaffold05409 | 1    | 2551 | 2551 | 100   | C_unshiu_01483 | 58630  | 56082  | 2549 | 3.98  | 99.29 |
| scaffold05413 | 7    | 2122 | 2116 | 82.98 | C_unshiu_00026 | 256641 | 258769 | 2129 | 0.28  | 98.36 |
| scaffold05415 | 5    | 1982 | 1978 | 77.57 | C_unshiu_02085 | 5636   | 3658   | 1979 | 5.33  | 99.34 |
| scaffold05417 | 1    | 2545 | 2545 | 100   | C_unshiu_00356 | 55082  | 57627  | 2546 | 1.07  | 99.49 |
| scaffold05419 | 1402 | 2543 | 1142 | 44.91 | C_unshiu_00095 | 212657 | 213800 | 1144 | 0.25  | 98.25 |
| scaffold05421 | 842  | 2541 | 1700 | 66.9  | C_unshiu_00013 | 891144 | 892848 | 1705 | 0.18  | 98.48 |
| scaffold05424 | 363  | 2539 | 2177 | 85.74 | C_unshiu_01592 | 26201  | 28379  | 2179 | 3.77  | 98.76 |
| scaffold05426 | 140  | 1485 | 1346 | 53.01 | C_unshiu_00142 | 58685  | 60030  | 1346 | 0.34  | 99.03 |
| scaffold05428 | 1    | 2537 | 2537 | 100   | C_unshiu_00907 | 22069  | 24605  | 2537 | 2.18  | 100   |
| scaffold05429 | 12   | 2510 | 2499 | 99.28 | C_unshiu_00003 | 142035 | 144529 | 2495 | 0.19  | 99.36 |
| scaffold05432 | 108  | 1998 | 1891 | 74.63 | C_unshiu_00001 | 159429 | 157542 | 1888 | 0.07  | 99.37 |
| scaffold05433 | 1    | 2533 | 2533 | 100   | C_unshiu_00433 | 106285 | 108833 | 2549 | 1.19  | 99.02 |
| scaffold05437 | 1    | 2532 | 2532 | 100   | C_unshiu_00917 | 75809  | 73278  | 2532 | 2.2   | 100   |
| scaffold05439 | 16   | 2531 | 2516 | 99.41 | C_unshiu_00271 | 196384 | 198887 | 2504 | 0.89  | 98.3  |
| scaffold05440 | 1    | 1039 | 1039 | 41.05 | C_unshiu_00080 | 168943 | 169982 | 1040 | 0.21  | 99.13 |
| scaffold05443 | 6    | 2324 | 2319 | 91.73 | C_unshiu_00291 | 62554  | 64884  | 2331 | 0.86  | 99.31 |
| scaffold05447 | 1    | 2525 | 2525 | 100   | C_unshiu_01318 | 36516  | 39040  | 2525 | 3.34  | 100   |
| scaffold05449 | 834  | 2522 | 1689 | 66.97 | C_unshiu_00051 | 490322 | 492013 | 1692 | 0.28  | 99.47 |
| scaffold05458 | 1    | 2463 | 2463 | 98.09 | C_unshiu_01755 | 25731  | 23269  | 2463 | 4.9   | 100   |
| scaffold05460 | 1088 | 2508 | 1421 | 56.66 | C_unshiu_00484 | 169234 | 170653 | 1420 | 0.72  | 99.09 |
| scaffold05468 | 1    | 2503 | 2503 | 100   | C_unshiu_01335 | 12281  | 9795   | 2487 | 3.32  | 99.16 |
| scaffold05469 | 1    | 2507 | 2507 | 100   | C_unshiu_00654 | 105971 | 108480 | 2510 | 1.62  | 99.28 |
| scaffold05472 | 1    | 2498 | 2498 | 100   | C_unshiu_00378 | 15893  | 18389  | 2497 | 1.08  | 99.64 |
| scaffold05473 | 1    | 2503 | 2503 | 100   | C_unshiu_02426 | 18207  | 15704  | 2504 | 9.36  | 99.68 |
| scaffold05476 | 1    | 2501 | 2501 | 100   | C_unshiu_00689 | 62691  | 65191  | 2501 | 1.71  | 100   |
| scaffold05477 | 1    | 2501 | 2501 | 100   | C_unshiu_00237 | 244251 | 246772 | 2522 | 0.83  | 98.93 |
| scaffold05479 | 1    | 1438 | 1438 | 57.54 | C_unshiu_00640 | 61907  | 60470  | 1438 | 0.91  | 98.26 |
| scaffold05483 | 1    | 2062 | 2062 | 82.65 | C_unshiu_01697 | 3678   | 5739   | 2062 | 3.92  | 98.21 |
| scaffold05483 | 111  | 2495 | 2385 | 95.59 | C_unshiu_00011 | 97220  | 99606  | 2387 | 0.25  | 98.53 |
| scaffold05488 | 1    | 2290 | 2290 | 91.89 | C_unshiu_00227 | 133197 | 130900 | 2298 | 0.74  | 99.17 |
| scaffold05492 | 1    | 2408 | 2408 | 96.75 | C_unshiu_00646 | 13868  | 16271  | 2404 | 1.52  | 99.71 |
| scaffold05496 | 1    | 2486 | 2486 | 100   | C_unshiu_00292 | 91470  | 93955  | 2486 | 0.92  | 100   |
| scaffold05497 | 1    | 2486 | 2486 | 100   | C_unshiu_00286 | 26022  | 23555  | 2468 | 0.9   | 98.11 |
| scaffold05499 | 1    | 2483 | 2483 | 100   | C_unshiu_00103 | 342310 | 339826 | 2485 | 0.55  | 99.24 |
| scaffold05502 | 1    | 1537 | 1537 | 61.9  | C_unshiu_00062 | 547135 | 548671 | 1537 | 0.27  | 100   |
| scaffold05505 | 935  | 2480 | 1546 | 62.34 | C_unshiu_00804 | 127874 | 126340 | 1535 | 1.2   | 98.84 |
| scaffold05506 | 1    | 2035 | 2035 | 81.3  | C_unshiu_00549 | 53309  | 55352  | 2044 | 1.14  | 98.29 |
| scaffold05508 | 1    | 2480 | 2480 | 100   | C_unshiu_00554 | 4696   | 2217   | 2480 | 1.4   | 100   |
| scaffold05509 | 531  | 1761 | 1231 | 49.66 | C_unshiu_01420 | 55107  | 53877  | 1231 | 1.77  | 100   |
| scaffold05511 | 36   | 1251 | 1216 | 49.07 | C_unshiu_00775 | 65812  | 67026  | 1215 | 0.92  | 98.6  |
| scaffold05514 | 1    | 2475 | 2475 | 100   | C_unshiu_00339 | 214678 | 212204 | 2475 | 0.99  | 100   |
| scaffold05518 | 1    | 2472 | 2472 | 100   | C_unshiu_00494 | 6276   | 8747   | 2472 | 1.28  | 99.88 |
| scaffold05519 | 1    | 2472 | 2472 | 100   | C_unshiu_00402 | 121256 | 123727 | 2472 | 1.11  | 100   |

|               |      |      |      |       |                |        |        |      |       |       |
|---------------|------|------|------|-------|----------------|--------|--------|------|-------|-------|
| scaffold05523 | 1    | 1117 | 1117 | 45.24 | C_unshiu_00244 | 250729 | 249613 | 1117 | 0.37  | 100   |
| scaffold05524 | 448  | 2469 | 2022 | 81.9  | C_unshiu_00263 | 128408 | 126384 | 2025 | 0.71  | 98.52 |
| scaffold05527 | 1    | 2463 | 2463 | 100   | C_unshiu_00472 | 45030  | 47492  | 2463 | 1.23  | 99.92 |
| scaffold05531 | 1    | 2233 | 2233 | 90.81 | C_unshiu_01059 | 92405  | 90173  | 2233 | 2.25  | 99.96 |
| scaffold05532 | 1    | 2458 | 2458 | 100   | C_unshiu_01413 | 63189  | 60729  | 2461 | 3.52  | 99.27 |
| scaffold05536 | 3    | 2047 | 2045 | 83.27 | C_unshiu_01570 | 56250  | 58270  | 2021 | 3.42  | 98.24 |
| scaffold05538 | 1068 | 2447 | 1380 | 56.4  | C_unshiu_00127 | 403718 | 402347 | 1372 | 0.33  | 98.99 |
| scaffold05539 | 1    | 2455 | 2455 | 100   | C_unshiu_00194 | 275364 | 277822 | 2459 | 0.72  | 99.43 |
| scaffold05542 | 1    | 1707 | 1707 | 69.67 | C_unshiu_00808 | 39367  | 41083  | 1717 | 1.35  | 98.66 |
| scaffold05551 | 1    | 2441 | 2441 | 100   | C_unshiu_00254 | 207299 | 209743 | 2445 | 0.83  | 98.77 |
| scaffold05553 | 1    | 2435 | 2435 | 100   | C_unshiu_00531 | 140514 | 142946 | 2433 | 1.32  | 99.34 |
| scaffold05555 | 1    | 2434 | 2434 | 100   | C_unshiu_01009 | 52755  | 55195  | 2441 | 2.32  | 99.02 |
| scaffold05556 | 1    | 2432 | 2432 | 100   | C_unshiu_01437 | 8866   | 6458   | 2409 | 3.55  | 98.77 |
| scaffold05557 | 1    | 2432 | 2432 | 100   | C_unshiu_00016 | 571983 | 574414 | 2432 | 0.28  | 99.96 |
| scaffold05562 | 1    | 2420 | 2420 | 100   | C_unshiu_00090 | 266086 | 263663 | 2424 | 0.52  | 98.64 |
| scaffold05570 | 1    | 2422 | 2422 | 100   | C_unshiu_00080 | 491196 | 488775 | 2422 | 0.49  | 100   |
| scaffold05574 | 1    | 1264 | 1264 | 52.21 | C_unshiu_00154 | 28445  | 29716  | 1272 | 0.33  | 98.11 |
| scaffold05576 | 1    | 2416 | 2416 | 99.92 | C_unshiu_00491 | 9688   | 12078  | 2391 | 1.22  | 98.26 |
| scaffold05579 | 1012 | 2185 | 1174 | 48.55 | C_unshiu_01378 | 51797  | 52970  | 1174 | 1.63  | 99.57 |
| scaffold05581 | 1    | 2417 | 2417 | 100   | C_unshiu_01137 | 84142  | 81695  | 2448 | 2.65  | 98.2  |
| scaffold05584 | 1    | 2188 | 2188 | 90.6  | C_unshiu_01248 | 78419  | 80608  | 2190 | 2.71  | 99.68 |
| scaffold05585 | 1    | 2415 | 2415 | 100   | C_unshiu_00726 | 74284  | 76697  | 2414 | 1.73  | 99.79 |
| scaffold05586 | 698  | 1913 | 1216 | 50.12 | C_unshiu_00155 | 143807 | 145019 | 1213 | 0.32  | 99.26 |
| scaffold05591 | 1    | 2411 | 2411 | 100   | C_unshiu_01847 | 31938  | 29528  | 2411 | 5.17  | 99.38 |
| scaffold05592 | 1    | 1744 | 1744 | 72.19 | C_unshiu_00186 | 123764 | 122022 | 1743 | 0.5   | 99.54 |
| scaffold05600 | 1    | 1965 | 1965 | 81.74 | C_unshiu_02352 | 2312   | 360    | 1953 | 6.89  | 99.19 |
| scaffold05601 | 1    | 2084 | 2084 | 86.69 | C_unshiu_01858 | 44125  | 46209  | 2085 | 4.51  | 99.19 |
| scaffold05607 | 1310 | 2400 | 1091 | 45.46 | C_unshiu_00011 | 201795 | 202887 | 1093 | 0.11  | 99.63 |
| scaffold05609 | 7    | 1965 | 1959 | 80.78 | C_unshiu_00301 | 258548 | 260503 | 1956 | 0.74  | 98.78 |
| scaffold05610 | 1    | 2394 | 2394 | 100   | C_unshiu_00104 | 289234 | 291639 | 2406 | 0.53  | 99.25 |
| scaffold05611 | 1    | 2350 | 2350 | 98.04 | C_unshiu_00212 | 160367 | 162716 | 2350 | 0.72  | 99.57 |
| scaffold05612 | 1    | 1664 | 1664 | 69.97 | C_unshiu_00506 | 107874 | 109545 | 1672 | 0.88  | 98.15 |
| scaffold05616 | 1    | 1117 | 1117 | 46.7  | C_unshiu_00472 | 79588  | 80704  | 1117 | 0.56  | 99.91 |
| scaffold05619 | 1    | 2392 | 2392 | 100   | C_unshiu_00118 | 162865 | 160441 | 2425 | 0.57  | 98.52 |
| scaffold05621 | 1    | 2385 | 2385 | 100   | C_unshiu_02917 | 8994   | 6610   | 2385 | 15.54 | 100   |
| scaffold05626 | 1    | 2387 | 2387 | 100   | C_unshiu_00110 | 368665 | 366273 | 2393 | 0.54  | 98.54 |
| scaffold05627 | 1    | 2387 | 2387 | 100   | C_unshiu_00366 | 97474  | 95070  | 2405 | 1.03  | 98.5  |
| scaffold05629 | 1    | 2388 | 2388 | 100   | C_unshiu_00069 | 452763 | 455163 | 2401 | 0.46  | 99.42 |
| scaffold05630 | 1100 | 2367 | 1268 | 53.14 | C_unshiu_00105 | 386301 | 385034 | 1268 | 0.28  | 99.92 |
| scaffold05631 | 1    | 2384 | 2384 | 100   | C_unshiu_01292 | 39226  | 41609  | 2384 | 3.05  | 100   |
| scaffold05632 | 1    | 2384 | 2384 | 100   | C_unshiu_00559 | 46600  | 48992  | 2393 | 1.36  | 99.37 |
| scaffold05636 | 1    | 2381 | 2381 | 100   | C_unshiu_01654 | 49890  | 47514  | 2377 | 4.32  | 99.29 |
| scaffold05637 | 175  | 2361 | 2187 | 92.63 | C_unshiu_02840 | 2105   | 4298   | 2194 | 13.03 | 99.09 |
| scaffold05638 | 1    | 2380 | 2380 | 100   | C_unshiu_00014 | 442931 | 440550 | 2382 | 0.26  | 99.87 |
| scaffold05639 | 1295 | 2380 | 1086 | 45.63 | C_unshiu_00066 | 55415  | 54346  | 1070 | 0.19  | 98.53 |
| scaffold05640 | 1302 | 2378 | 1077 | 45.29 | C_unshiu_02767 | 7169   | 6084   | 1086 | 5.79  | 98.71 |
| scaffold05644 | 1    | 2377 | 2377 | 100   | C_unshiu_00026 | 317831 | 315448 | 2384 | 0.32  | 99.58 |
| scaffold05645 | 1    | 2377 | 2377 | 100   | C_unshiu_00110 | 405645 | 408022 | 2378 | 0.54  | 99.79 |
| scaffold05646 | 1    | 2378 | 2378 | 100   | C_unshiu_01868 | 43939  | 41561  | 2379 | 5.19  | 99.66 |
| scaffold05651 | 1    | 2364 | 2364 | 100   | C_unshiu_00188 | 186510 | 184167 | 2344 | 0.68  | 98.02 |
| scaffold05655 | 1    | 1727 | 1727 | 72.87 | C_unshiu_00680 | 29443  | 27713  | 1731 | 1.17  | 98.9  |
| scaffold05658 | 1    | 1135 | 1135 | 48.05 | C_unshiu_01868 | 14128  | 12994  | 1135 | 2.48  | 98.15 |
| scaffold05659 | 1    | 2366 | 2366 | 100   | C_unshiu_00664 | 106329 | 103991 | 2339 | 1.53  | 98.01 |
| scaffold05660 | 1    | 2366 | 2366 | 100   | C_unshiu_00180 | 175672 | 173302 | 2371 | 0.66  | 98.44 |
| scaffold05669 | 1    | 1388 | 1388 | 58.81 | C_unshiu_01311 | 28754  | 30140  | 1387 | 1.82  | 98.35 |
| scaffold05670 | 1    | 2356 | 2356 | 100   | C_unshiu_02992 | 6022   | 8378   | 2357 | 17.92 | 99.87 |
| scaffold05673 | 1117 | 2360 | 1244 | 52.71 | C_unshiu_01430 | 38408  | 37165  | 1244 | 1.82  | 99.04 |
| scaffold05677 | 909  | 2343 | 1435 | 61.25 | C_unshiu_01060 | 17533  | 16077  | 1457 | 1.47  | 98.22 |
| scaffold05679 | 1    | 2349 | 2349 | 100   | C_unshiu_01659 | 25614  | 23266  | 2349 | 4.29  | 100   |
| scaffold05683 | 1    | 2360 | 2360 | 100   | C_unshiu_00114 | 308918 | 306563 | 2356 | 0.54  | 99.19 |
| scaffold05687 | 1    | 1076 | 1076 | 46.2  | C_unshiu_00574 | 29606  | 28530  | 1077 | 0.62  | 99.35 |
| scaffold05690 | 1    | 1237 | 1237 | 52.8  | C_unshiu_00229 | 291935 | 290697 | 1239 | 0.4   | 99.76 |
| scaffold05695 | 1    | 1176 | 1176 | 50.41 | C_unshiu_00356 | 24930  | 26106  | 1177 | 0.5   | 98.05 |
| scaffold05699 | 1    | 1395 | 1395 | 59.72 | C_unshiu_00451 | 195353 | 193962 | 1392 | 0.67  | 99.28 |
| scaffold05700 | 1    | 2337 | 2337 | 100   | C_unshiu_00592 | 149587 | 151924 | 2338 | 1.38  | 99.87 |
| scaffold05701 | 1029 | 2336 | 1308 | 55.99 | C_unshiu_00252 | 93875  | 92569  | 1307 | 0.44  | 99.39 |
| scaffold05702 | 1    | 2335 | 2335 | 100   | C_unshiu_02348 | 16682  | 14345  | 2338 | 8.24  | 99.36 |
| scaffold05706 | 1    | 2331 | 2331 | 100   | C_unshiu_00927 | 88764  | 91094  | 2331 | 2.04  | 99.96 |
| scaffold05708 | 1    | 2331 | 2331 | 100   | C_unshiu_00036 | 205154 | 202844 | 2311 | 0.34  | 98.63 |
| scaffold05711 | 34   | 2327 | 2294 | 98.58 | C_unshiu_00025 | 295609 | 297905 | 2297 | 0.3   | 98.74 |
| scaffold05714 | 1    | 2326 | 2326 | 100   | C_unshiu_01749 | 8003   | 5660   | 2344 | 4.63  | 98.81 |
| scaffold05716 | 7    | 2316 | 2310 | 99.57 | C_unshiu_02201 | 26959  | 29264  | 2306 | 6.96  | 99.52 |
| scaffold05722 | 856  | 2316 | 1461 | 63.08 | C_unshiu_02039 | 25087  | 23630  | 1458 | 3.73  | 99.25 |
| scaffold05723 | 1    | 1959 | 1959 | 84.33 | C_unshiu_02687 | 13450  | 15394  | 1945 | 9.64  | 98.47 |
| scaffold05724 | 1    | 1568 | 1568 | 67.56 | C_unshiu_00157 | 350711 | 349144 | 1568 | 0.42  | 98.21 |
| scaffold05727 | 222  | 1549 | 1328 | 58.04 | C_unshiu_02389 | 914    | 2235   | 1322 | 4.81  | 98.87 |
| scaffold05728 | 1    | 2321 | 2321 | 100   | C_unshiu_00375 | 97766  | 95447  | 2320 | 1     | 99.87 |
| scaffold05745 | 1    | 2306 | 2306 | 100   | C_unshiu_00406 | 105849 | 103545 | 2305 | 1.04  | 99.57 |
| scaffold05746 | 1    | 1796 | 1796 | 77.92 | C_unshiu_00150 | 146726 | 144913 | 1814 | 0.47  | 98.9  |

|               |      |      |      |       |                |        |        |      |       |       |
|---------------|------|------|------|-------|----------------|--------|--------|------|-------|-------|
| scaffold05748 | 1    | 1300 | 1300 | 56.42 | C_unshiu_00982 | 25986  | 27285  | 1300 | 1.2   | 100   |
| scaffold05748 | 1293 | 2304 | 1012 | 43.92 | C_unshiu_00982 | 29154  | 30174  | 1021 | 0.94  | 98.24 |
| scaffold05750 | 1264 | 2282 | 1019 | 44.65 | C_unshiu_00081 | 468575 | 467557 | 1019 | 0.21  | 99.51 |
| scaffold05752 | 1    | 2302 | 2302 | 100   | C_unshiu_01596 | 17226  | 14925  | 2302 | 3.99  | 99.83 |
| scaffold05754 | 1    | 2301 | 2301 | 100   | C_unshiu_00312 | 84595  | 82296  | 2300 | 0.89  | 99.52 |
| scaffold05756 | 1    | 2300 | 2300 | 100   | C_unshiu_00078 | 209605 | 207306 | 2300 | 0.46  | 99.87 |
| scaffold05759 | 1    | 1569 | 1569 | 68.25 | C_unshiu_01304 | 73388  | 71819  | 1570 | 2.03  | 99.55 |
| scaffold05762 | 1    | 1317 | 1317 | 57.29 | C_unshiu_01934 | 13200  | 14530  | 1331 | 3.07  | 98.5  |
| scaffold05766 | 1    | 2293 | 2293 | 100   | C_unshiu_02032 | 10281  | 7989   | 2293 | 5.8   | 99.87 |
| scaffold05767 | 1    | 2280 | 2280 | 99.65 | C_unshiu_00009 | 763934 | 766212 | 2279 | 0.22  | 99.96 |
| scaffold05774 | 1    | 2283 | 2283 | 100   | C_unshiu_00142 | 179366 | 177088 | 2279 | 0.57  | 99.12 |
| scaffold05776 | 5    | 2279 | 2275 | 99.82 | C_unshiu_00331 | 145555 | 147835 | 2281 | 0.9   | 99.12 |
| scaffold05778 | 1    | 2281 | 2281 | 100   | C_unshiu_00683 | 73179  | 75459  | 2281 | 1.54  | 100   |
| scaffold05782 | 1    | 1258 | 1258 | 55.18 | C_unshiu_01529 | 39265  | 38007  | 1259 | 2.04  | 99.52 |
| scaffold05784 | 45   | 2261 | 2217 | 97.45 | C_unshiu_00191 | 301063 | 298849 | 2215 | 0.64  | 99.73 |
| scaffold05785 | 1    | 2274 | 2274 | 100   | C_unshiu_00009 | 537781 | 540057 | 2277 | 0.22  | 99.6  |
| scaffold05786 | 1    | 2262 | 2262 | 99.56 | C_unshiu_00351 | 110581 | 108320 | 2262 | 0.94  | 100   |
| scaffold05788 | 1    | 2256 | 2256 | 100   | C_unshiu_01482 | 19398  | 17155  | 2244 | 3.5   | 99.16 |
| scaffold05789 | 1    | 1537 | 1537 | 67.74 | C_unshiu_00144 | 129618 | 131155 | 1538 | 0.39  | 98.05 |
| scaffold05790 | 1    | 1412 | 1412 | 62.2  | C_unshiu_02267 | 13062  | 11652  | 1411 | 4.56  | 98.16 |
| scaffold05791 | 1    | 2269 | 2269 | 100   | C_unshiu_01683 | 42464  | 40192  | 2273 | 4.26  | 99.3  |
| scaffold05796 | 1    | 2264 | 2264 | 100   | C_unshiu_00958 | 54150  | 51882  | 2269 | 2.05  | 99.12 |
| scaffold05797 | 1    | 1151 | 1151 | 50.84 | C_unshiu_01988 | 10170  | 9020   | 1151 | 2.81  | 100   |
| scaffold05797 | 1205 | 2264 | 1060 | 46.82 | C_unshiu_01988 | 8930   | 7871   | 1060 | 2.59  | 100   |
| scaffold05801 | 1    | 2258 | 2258 | 100   | C_unshiu_02361 | 645    | 2893   | 2249 | 8.01  | 98.15 |
| scaffold05802 | 6    | 2262 | 2257 | 99.78 | C_unshiu_00064 | 490006 | 487747 | 2260 | 0.4   | 99.65 |
| scaffold05807 | 1    | 1426 | 1426 | 63.18 | C_unshiu_00443 | 188079 | 186653 | 1427 | 0.68  | 99.93 |
| scaffold05808 | 1    | 2257 | 2257 | 100   | C_unshiu_00519 | 102628 | 104884 | 2257 | 1.22  | 99.87 |
| scaffold05811 | 1    | 2256 | 2256 | 100   | C_unshiu_01129 | 13858  | 11603  | 2256 | 2.43  | 100   |
| scaffold05813 | 1    | 2254 | 2254 | 100   | C_unshiu_01693 | 11063  | 13326  | 2264 | 4.29  | 98.59 |
| scaffold05818 | 1    | 2252 | 2252 | 100   | C_unshiu_00163 | 261725 | 263981 | 2257 | 0.61  | 99.38 |
| scaffold05819 | 1    | 2251 | 2251 | 100   | C_unshiu_00850 | 6291   | 8540   | 2250 | 1.84  | 99.6  |
| scaffold05821 | 639  | 2219 | 1581 | 70.27 | C_unshiu_00877 | 103261 | 104838 | 1578 | 1.32  | 98.99 |
| scaffold05822 | 1    | 2250 | 2250 | 100   | C_unshiu_01952 | 17121  | 19370  | 2250 | 5.29  | 100   |
| scaffold05830 | 1    | 2253 | 2253 | 100   | C_unshiu_00194 | 212667 | 210393 | 2275 | 0.67  | 98.59 |
| scaffold05831 | 974  | 2210 | 1237 | 55.97 | C_unshiu_01341 | 40300  | 39058  | 1243 | 1.67  | 98.95 |
| scaffold05833 | 190  | 1447 | 1258 | 55.99 | C_unshiu_01521 | 15625  | 16881  | 1257 | 2.02  | 98.81 |
| scaffold05834 | 564  | 1791 | 1228 | 55.19 | C_unshiu_00008 | 711278 | 712514 | 1237 | 0.11  | 98.71 |
| scaffold05837 | 1    | 1483 | 1483 | 66.18 | C_unshiu_00115 | 255305 | 256791 | 1487 | 0.34  | 99.66 |
| scaffold05840 | 1    | 1924 | 1924 | 86.2  | C_unshiu_02838 | 8409   | 6486   | 1924 | 11.39 | 100   |
| scaffold05841 | 1    | 2236 | 2236 | 100   | C_unshiu_00308 | 186957 | 184721 | 2237 | 0.85  | 98.84 |
| scaffold05844 | 1    | 2233 | 2233 | 100   | C_unshiu_01284 | 51046  | 48814  | 2233 | 2.85  | 100   |
| scaffold05846 | 1    | 2232 | 2232 | 100   | C_unshiu_00040 | 417191 | 419422 | 2232 | 0.34  | 99.87 |
| scaffold05848 | 1    | 1705 | 1705 | 76.39 | C_unshiu_00372 | 174423 | 176126 | 1704 | 0.73  | 98.24 |
| scaffold05850 | 1    | 1079 | 1079 | 48.39 | C_unshiu_00036 | 127407 | 128487 | 1081 | 0.16  | 99.44 |
| scaffold05851 | 1    | 2228 | 2228 | 100   | C_unshiu_00449 | 137983 | 140210 | 2228 | 1.07  | 100   |
| scaffold05858 | 340  | 2221 | 1882 | 84.74 | C_unshiu_00220 | 282964 | 284817 | 1854 | 0.59  | 98.09 |
| scaffold05860 | 1    | 1475 | 1475 | 66.41 | C_unshiu_00845 | 90126  | 88648  | 1479 | 1.2   | 99.46 |
| scaffold05861 | 1    | 2221 | 2221 | 100   | C_unshiu_02108 | 2784   | 5004   | 2221 | 6.13  | 99.95 |
| scaffold05866 | 1    | 1998 | 1998 | 90.12 | C_unshiu_01040 | 98412  | 100402 | 1991 | 1.95  | 99.25 |
| scaffold05872 | 2    | 1741 | 1740 | 78.59 | C_unshiu_01156 | 72947  | 71209  | 1739 | 1.93  | 98.57 |
| scaffold05873 | 1    | 2214 | 2214 | 100   | C_unshiu_00167 | 338649 | 340862 | 2214 | 0.6   | 100   |
| scaffold05875 | 5    | 2213 | 2209 | 99.82 | C_unshiu_01591 | 35267  | 33063  | 2205 | 3.79  | 99.5  |
| scaffold05877 | 1    | 2207 | 2207 | 100   | C_unshiu_00137 | 261434 | 259239 | 2196 | 0.54  | 98.78 |
| scaffold05878 | 80   | 2214 | 2135 | 96.43 | C_unshiu_00134 | 236734 | 234598 | 2137 | 0.53  | 98.78 |
| scaffold05879 | 1    | 2209 | 2209 | 100   | C_unshiu_00906 | 19321  | 17133  | 2189 | 1.88  | 98.78 |
| scaffold05883 | 1    | 2203 | 2203 | 100   | C_unshiu_00106 | 180423 | 182623 | 2201 | 0.49  | 98.37 |
| scaffold05887 | 1    | 1208 | 1208 | 54.81 | C_unshiu_02645 | 8495   | 7291   | 1205 | 5.72  | 99.67 |
| scaffold05887 | 767  | 2204 | 1438 | 65.25 | C_unshiu_00036 | 596911 | 595474 | 1438 | 0.21  | 99.93 |
| scaffold05889 | 1    | 2204 | 2204 | 100   | C_unshiu_01407 | 26246  | 24040  | 2207 | 3.15  | 99.59 |
| scaffold05891 | 104  | 2202 | 2099 | 95.32 | C_unshiu_00764 | 121558 | 119461 | 2098 | 1.56  | 99.33 |
| scaffold05894 | 1    | 1091 | 1091 | 49.66 | C_unshiu_01006 | 62728  | 63818  | 1091 | 1.04  | 99.08 |
| scaffold05896 | 1    | 1952 | 1952 | 88.89 | C_unshiu_00326 | 39399  | 41346  | 1948 | 0.77  | 99.69 |
| scaffold05902 | 4    | 2194 | 2191 | 99.86 | C_unshiu_00186 | 63012  | 60827  | 2186 | 0.63  | 98.59 |
| scaffold05906 | 1    | 2187 | 2187 | 99.77 | C_unshiu_00030 | 41509  | 39306  | 2204 | 0.31  | 99.05 |
| scaffold05907 | 462  | 1943 | 1482 | 67.67 | C_unshiu_00199 | 57017  | 55530  | 1488 | 0.44  | 98.66 |
| scaffold05910 | 1    | 2189 | 2189 | 100   | C_unshiu_00387 | 126804 | 124616 | 2189 | 0.97  | 99.95 |
| scaffold05911 | 1    | 2188 | 2188 | 100   | C_unshiu_00906 | 24856  | 22675  | 2182 | 1.88  | 98.45 |
| scaffold05913 | 1    | 2187 | 2187 | 100   | C_unshiu_00251 | 69195  | 67018  | 2178 | 0.74  | 99.09 |
| scaffold05914 | 1    | 1295 | 1295 | 59.29 | C_unshiu_01948 | 33653  | 32363  | 1291 | 3.02  | 98    |
| scaffold05918 | 1    | 2184 | 2184 | 100   | C_unshiu_00949 | 96555  | 94372  | 2184 | 1.95  | 100   |
| scaffold05920 | 1    | 2182 | 2182 | 100   | C_unshiu_00387 | 121877 | 119696 | 2182 | 0.96  | 99.77 |
| scaffold05921 | 1    | 2177 | 2177 | 100   | C_unshiu_00300 | 2856   | 687    | 2170 | 0.82  | 99.36 |
| scaffold05922 | 1    | 2182 | 2182 | 100   | C_unshiu_00315 | 74527  | 76682  | 2156 | 0.83  | 98.53 |
| scaffold05923 | 1    | 2181 | 2181 | 100   | C_unshiu_00626 | 64875  | 62692  | 2184 | 1.35  | 99.82 |
| scaffold05925 | 1    | 2180 | 2180 | 100   | C_unshiu_00897 | 86833  | 89007  | 2175 | 1.85  | 99.36 |
| scaffold05928 | 1    | 2160 | 2160 | 100   | C_unshiu_00125 | 5306   | 3144   | 2163 | 0.52  | 99.82 |
| scaffold05929 | 1    | 1236 | 1236 | 56.8  | C_unshiu_00121 | 278820 | 280054 | 1235 | 0.29  | 98.38 |
| scaffold05931 | 329  | 1951 | 1623 | 74.62 | C_unshiu_00169 | 96825  | 98447  | 1623 | 0.44  | 100   |

|               |      |      |      |       |                |        |        |      |      |       |
|---------------|------|------|------|-------|----------------|--------|--------|------|------|-------|
| scaffold05938 | 381  | 2168 | 1788 | 82.47 | C_unshiu_00383 | 165204 | 166993 | 1790 | 0.79 | 99.78 |
| scaffold05939 | 1    | 1651 | 1651 | 76.15 | C_unshiu_00866 | 36179  | 34524  | 1656 | 1.37 | 99.21 |
| scaffold05940 | 1    | 2169 | 2169 | 100   | C_unshiu_00918 | 35948  | 38116  | 2169 | 1.89 | 99.86 |
| scaffold05942 | 1    | 1106 | 1106 | 51.04 | C_unshiu_00796 | 96825  | 95721  | 1105 | 0.86 | 99.91 |
| scaffold05943 | 1    | 2167 | 2167 | 100   | C_unshiu_01042 | 59629  | 57463  | 2167 | 2.14 | 100   |
| scaffold05947 | 210  | 2159 | 1950 | 90.32 | C_unshiu_01011 | 58528  | 56596  | 1933 | 1.84 | 98.36 |
| scaffold05950 | 1    | 2163 | 2163 | 100   | C_unshiu_01221 | 61584  | 59407  | 2178 | 2.61 | 98.76 |
| scaffold05951 | 1    | 2163 | 2163 | 100   | C_unshiu_01974 | 4363   | 6526   | 2164 | 5.2  | 98.52 |
| scaffold05954 | 768  | 2135 | 1368 | 63.36 | C_unshiu_00683 | 85757  | 87132  | 1376 | 0.93 | 99.2  |
| scaffold05959 | 1    | 1444 | 1444 | 67.01 | C_unshiu_02390 | 17671  | 19114  | 1444 | 5.26 | 100   |
| scaffold05962 | 3    | 1950 | 1948 | 90.39 | C_unshiu_00194 | 189970 | 191912 | 1943 | 0.57 | 98.97 |
| scaffold05964 | 5    | 1636 | 1632 | 75.87 | C_unshiu_02050 | 27739  | 29383  | 1645 | 4.26 | 98.18 |
| scaffold05965 | 1    | 1826 | 1826 | 84.77 | C_unshiu_01370 | 32989  | 31166  | 1824 | 2.5  | 99.67 |
| scaffold05966 | 1    | 2161 | 2161 | 100   | C_unshiu_00411 | 67339  | 69483  | 2145 | 0.97 | 98.06 |
| scaffold05967 | 1    | 1058 | 1058 | 49.14 | C_unshiu_00422 | 168657 | 167601 | 1057 | 0.48 | 99.72 |
| scaffold05967 | 1059 | 2153 | 1095 | 50.86 | C_unshiu_01292 | 16235  | 15141  | 1095 | 1.4  | 98.18 |
| scaffold05968 | 1    | 2040 | 2040 | 94.75 | C_unshiu_01110 | 69653  | 71694  | 2042 | 2.15 | 99.46 |
| scaffold05975 | 829  | 1873 | 1045 | 48.58 | C_unshiu_00152 | 190982 | 192026 | 1045 | 0.27 | 99.33 |
| scaffold05978 | 1    | 1914 | 1914 | 89.19 | C_unshiu_00560 | 49218  | 47299  | 1920 | 1.1  | 98.07 |
| scaffold05980 | 1    | 2146 | 2146 | 100   | C_unshiu_00728 | 9637   | 7490   | 2148 | 1.55 | 99.16 |
| scaffold05982 | 1    | 2144 | 2144 | 100   | C_unshiu_00812 | 40219  | 42362  | 2144 | 1.68 | 100   |
| scaffold05990 | 1    | 2140 | 2140 | 100   | C_unshiu_01099 | 35545  | 33405  | 2141 | 2.23 | 99.86 |
| scaffold05991 | 653  | 2140 | 1488 | 69.53 | C_unshiu_00466 | 120613 | 119124 | 1490 | 0.73 | 98.59 |
| scaffold05992 | 1    | 1792 | 1792 | 83.86 | C_unshiu_00257 | 65062  | 63272  | 1791 | 0.62 | 98.27 |
| scaffold05994 | 1    | 2138 | 2138 | 100   | C_unshiu_02590 | 2104   | 4242   | 2139 | 9.53 | 99.91 |
| scaffold05997 | 493  | 2136 | 1644 | 76.97 | C_unshiu_01921 | 18417  | 20060  | 1644 | 3.74 | 99.45 |
| scaffold06005 | 1    | 2131 | 2131 | 100   | C_unshiu_01254 | 11471  | 13601  | 2131 | 2.64 | 100   |
| scaffold06008 | 1    | 2131 | 2131 | 100   | C_unshiu_01596 | 26707  | 24577  | 2131 | 3.7  | 100   |
| scaffold06010 | 2    | 2130 | 2129 | 99.95 | C_unshiu_01793 | 31688  | 29558  | 2131 | 4.37 | 99.44 |
| scaffold06014 | 1    | 1980 | 1980 | 93    | C_unshiu_01137 | 62185  | 60201  | 1985 | 2.15 | 99.3  |
| scaffold06023 | 4    | 2124 | 2121 | 99.86 | C_unshiu_00149 | 285951 | 288066 | 2116 | 0.55 | 99.48 |
| scaffold06030 | 1    | 1231 | 1231 | 58.09 | C_unshiu_00811 | 66227  | 67459  | 1233 | 0.97 | 99.59 |
| scaffold06034 | 1    | 2119 | 2119 | 100   | C_unshiu_00217 | 277275 | 279400 | 2126 | 0.66 | 98.03 |
| scaffold06037 | 1    | 2117 | 2117 | 100   | C_unshiu_00192 | 24452  | 22336  | 2117 | 0.62 | 98.92 |
| scaffold06039 | 1    | 2114 | 2114 | 100   | C_unshiu_00975 | 40090  | 42202  | 2113 | 1.94 | 98.63 |
| scaffold06048 | 1    | 2111 | 2111 | 100   | C_unshiu_00034 | 287900 | 290006 | 2107 | 0.3  | 98.82 |
| scaffold06058 | 4    | 2108 | 2105 | 99.86 | C_unshiu_01095 | 9893   | 7785   | 2109 | 2.19 | 99.81 |
| scaffold06063 | 1    | 2103 | 2103 | 100   | C_unshiu_01748 | 24422  | 22292  | 2131 | 4.21 | 98.5  |
| scaffold06071 | 1    | 2099 | 2099 | 100   | C_unshiu_00069 | 160849 | 162947 | 2099 | 0.4  | 100   |
| scaffold06072 | 1    | 2098 | 2098 | 100   | C_unshiu_01572 | 18142  | 16045  | 2098 | 3.55 | 100   |
| scaffold06073 | 1    | 2098 | 2098 | 100   | C_unshiu_00404 | 170655 | 168559 | 2097 | 0.94 | 99.95 |
| scaffold06077 | 1    | 2094 | 2094 | 100   | C_unshiu_00026 | 13914  | 11821  | 2094 | 0.28 | 99.9  |
| scaffold06079 | 979  | 2095 | 1117 | 53.32 | C_unshiu_00312 | 135431 | 136547 | 1117 | 0.43 | 99.37 |
| scaffold06082 | 1    | 1820 | 1820 | 86.91 | C_unshiu_00119 | 314359 | 316189 | 1831 | 0.43 | 99.02 |
| scaffold06084 | 787  | 2077 | 1291 | 62.16 | C_unshiu_00718 | 31966  | 33259  | 1294 | 0.91 | 99.61 |
| scaffold06087 | 1    | 2090 | 2090 | 100   | C_unshiu_00572 | 108063 | 105972 | 2092 | 1.21 | 99.9  |
| scaffold06093 | 91   | 2088 | 1998 | 95.69 | C_unshiu_00078 | 460399 | 462396 | 1998 | 0.4  | 99.95 |
| scaffold06094 | 1    | 2084 | 2084 | 100   | C_unshiu_00314 | 242958 | 245041 | 2084 | 0.81 | 100   |
| scaffold06095 | 1    | 2087 | 2087 | 100   | C_unshiu_00471 | 70185  | 68095  | 2091 | 1.04 | 99.81 |
| scaffold06096 | 1    | 2052 | 2052 | 100   | C_unshiu_00620 | 2577   | 537    | 2041 | 1.25 | 99.08 |
| scaffold06101 | 1    | 1299 | 1299 | 62.33 | C_unshiu_01596 | 24311  | 23010  | 1302 | 2.26 | 99.77 |
| scaffold06103 | 1    | 2084 | 2084 | 100   | C_unshiu_00142 | 251878 | 249795 | 2084 | 0.52 | 99.52 |
| scaffold06105 | 691  | 2081 | 1391 | 66.84 | C_unshiu_00115 | 187024 | 185640 | 1385 | 0.32 | 98.27 |
| scaffold06106 | 1    | 2068 | 2068 | 99.52 | C_unshiu_00069 | 121318 | 123404 | 2087 | 0.4  | 99.04 |
| scaffold06107 | 1    | 2077 | 2077 | 100   | C_unshiu_01348 | 5628   | 3552   | 2077 | 2.8  | 100   |
| scaffold06109 | 1    | 1856 | 1856 | 89.45 | C_unshiu_00285 | 69544  | 67692  | 1853 | 0.68 | 98.98 |
| scaffold06112 | 1    | 2073 | 2073 | 100   | C_unshiu_00823 | 110295 | 112366 | 2072 | 1.64 | 99.13 |
| scaffold06113 | 1    | 1173 | 1173 | 56.61 | C_unshiu_00619 | 113867 | 115039 | 1173 | 0.72 | 99.83 |
| scaffold06117 | 1    | 1456 | 1456 | 70.34 | C_unshiu_00410 | 80014  | 81472  | 1459 | 0.66 | 98.36 |
| scaffold06118 | 1    | 2070 | 2070 | 100   | C_unshiu_00591 | 81474  | 83559  | 2086 | 1.23 | 98.75 |
| scaffold06120 | 1    | 2070 | 2070 | 100   | C_unshiu_00115 | 8752   | 6672   | 2081 | 0.48 | 98.94 |
| scaffold06122 | 611  | 2063 | 1453 | 70.43 | C_unshiu_01790 | 28972  | 27520  | 1453 | 2.98 | 99.31 |
| scaffold06123 | 1    | 1001 | 1001 | 47.69 | C_unshiu_00552 | 157529 | 158535 | 1007 | 0.56 | 99.4  |
| scaffold06124 | 1    | 2069 | 2069 | 100   | C_unshiu_01012 | 49344  | 51412  | 2069 | 1.98 | 100   |
| scaffold06127 | 1    | 1181 | 1181 | 57.11 | C_unshiu_02810 | 10408  | 11588  | 1181 | 6.68 | 99.92 |
| scaffold06128 | 1    | 2067 | 2067 | 100   | C_unshiu_00699 | 20309  | 18226  | 2084 | 1.45 | 99.18 |
| scaffold06129 | 1    | 2068 | 2068 | 100   | C_unshiu_00482 | 26892  | 24827  | 2066 | 1.05 | 99.37 |
| scaffold06130 | 1    | 2067 | 2067 | 100   | C_unshiu_00089 | 51420  | 53465  | 2046 | 0.44 | 98.36 |
| scaffold06131 | 1    | 2067 | 2067 | 100   | C_unshiu_00154 | 323944 | 326011 | 2068 | 0.54 | 98.79 |
| scaffold06134 | 1    | 2065 | 2065 | 100   | C_unshiu_01290 | 9827   | 7776   | 2052 | 2.62 | 99.08 |
| scaffold06135 | 1    | 2065 | 2065 | 100   | C_unshiu_01153 | 69099  | 67035  | 2065 | 2.29 | 99.81 |
| scaffold06136 | 1    | 2062 | 2062 | 100   | C_unshiu_00858 | 71985  | 74051  | 2067 | 1.7  | 98.79 |
| scaffold06138 | 3    | 2061 | 2059 | 99.9  | C_unshiu_00390 | 62499  | 60444  | 2056 | 0.91 | 98.06 |
| scaffold06139 | 1    | 1097 | 1097 | 53.23 | C_unshiu_02903 | 13252  | 14348  | 1097 | 7.01 | 100   |
| scaffold06141 | 1    | 1522 | 1522 | 73.92 | C_unshiu_00047 | 451607 | 450088 | 1520 | 0.24 | 98.04 |
| scaffold06144 | 1    | 1376 | 1376 | 66.89 | C_unshiu_00003 | 854938 | 853563 | 1376 | 0.11 | 99.56 |
| scaffold06149 | 1    | 1256 | 1256 | 61.18 | C_unshiu_00025 | 709604 | 710859 | 1256 | 0.17 | 100   |
| scaffold06152 | 1    | 2052 | 2052 | 100   | C_unshiu_01020 | 67946  | 65894  | 2053 | 1.97 | 99.56 |
| scaffold06155 | 1    | 2050 | 2050 | 100   | C_unshiu_00179 | 142395 | 144445 | 2051 | 0.57 | 99.9  |

|               |     |      |      |       |                |        |        |      |       |       |
|---------------|-----|------|------|-------|----------------|--------|--------|------|-------|-------|
| scaffold06157 | 534 | 2049 | 1516 | 73.99 | C_unshiu_02958 | 2621   | 4148   | 1528 | 10.77 | 99.21 |
| scaffold06158 | 1   | 2047 | 2047 | 100   | C_unshiu_00505 | 108217 | 110262 | 2046 | 1.08  | 98.25 |
| scaffold06161 | 1   | 2048 | 2048 | 100   | C_unshiu_01532 | 22890  | 20843  | 2048 | 3.33  | 99.71 |
| scaffold06162 | 1   | 1721 | 1721 | 84.03 | C_unshiu_00618 | 89905  | 91639  | 1735 | 1.06  | 98.44 |
| scaffold06164 | 1   | 2040 | 2040 | 99.66 | C_unshiu_00939 | 92771  | 90731  | 2041 | 1.81  | 99.71 |
| scaffold06168 | 1   | 2043 | 2043 | 100   | C_unshiu_01533 | 51063  | 53105  | 2043 | 3.32  | 99.31 |
| scaffold06169 | 2   | 2044 | 2043 | 99.95 | C_unshiu_00192 | 335853 | 337901 | 2049 | 0.6   | 98.73 |
| scaffold06170 | 1   | 2041 | 2041 | 100   | C_unshiu_00175 | 233919 | 235955 | 2037 | 0.56  | 98.68 |
| scaffold06174 | 1   | 1226 | 1226 | 60.04 | C_unshiu_00898 | 31996  | 30771  | 1226 | 1.05  | 99.43 |
| scaffold06177 | 1   | 2038 | 2038 | 100   | C_unshiu_02040 | 19196  | 17155  | 2042 | 5.22  | 99.66 |
| scaffold06178 | 664 | 2037 | 1374 | 67.45 | C_unshiu_00026 | 18879  | 20254  | 1376 | 0.18  | 99.2  |
| scaffold06179 | 1   | 2038 | 2038 | 100   | C_unshiu_00088 | 114030 | 111986 | 2045 | 0.44  | 99.12 |
| scaffold06181 | 1   | 1174 | 1174 | 57.83 | C_unshiu_00690 | 108123 | 109305 | 1183 | 0.81  | 98.82 |
| scaffold06187 | 1   | 2033 | 2033 | 100   | C_unshiu_00135 | 102974 | 100941 | 2034 | 0.5   | 99.9  |
| scaffold06193 | 1   | 2029 | 2029 | 100   | C_unshiu_00194 | 266619 | 268657 | 2039 | 0.6   | 99.12 |
| scaffold06194 | 26  | 1864 | 1839 | 90.86 | C_unshiu_00400 | 182868 | 184704 | 1837 | 0.82  | 98.91 |
| scaffold06195 | 995 | 2025 | 1031 | 50.91 | C_unshiu_00149 | 376767 | 377800 | 1034 | 0.27  | 99.03 |
| scaffold06197 | 219 | 2026 | 1808 | 89.24 | C_unshiu_01183 | 42157  | 40349  | 1809 | 2.08  | 99.94 |
| scaffold06201 | 1   | 2022 | 2022 | 100   | C_unshiu_00243 | 101620 | 99590  | 2031 | 0.68  | 99.07 |
| scaffold06203 | 3   | 2018 | 2016 | 99.9  | C_unshiu_00457 | 134952 | 136969 | 2018 | 0.98  | 99.9  |
| scaffold06204 | 1   | 1370 | 1370 | 67.72 | C_unshiu_00036 | 166199 | 167569 | 1371 | 0.2   | 99.27 |
| scaffold06207 | 1   | 2022 | 2022 | 100   | C_unshiu_00348 | 242248 | 244269 | 2022 | 0.82  | 100   |
| scaffold06210 | 1   | 2022 | 2022 | 100   | C_unshiu_00352 | 168546 | 170567 | 2022 | 0.84  | 99.85 |
| scaffold06213 | 1   | 2022 | 2022 | 100   | C_unshiu_01723 | 35941  | 33916  | 2026 | 3.91  | 98.77 |
| scaffold06215 | 1   | 2019 | 2019 | 100   | C_unshiu_02400 | 24342  | 26341  | 2000 | 7.33  | 98.91 |
| scaffold06218 | 1   | 1178 | 1178 | 58.4  | C_unshiu_00390 | 126828 | 128005 | 1178 | 0.52  | 99.75 |
| scaffold06223 | 1   | 2014 | 2014 | 100   | C_unshiu_00021 | 83830  | 81812  | 2019 | 0.26  | 99.7  |
| scaffold06228 | 424 | 2013 | 1590 | 78.99 | C_unshiu_02917 | 11657  | 10074  | 1584 | 10.32 | 99.43 |
| scaffold06231 | 1   | 1009 | 1009 | 50.17 | C_unshiu_00222 | 181461 | 180453 | 1009 | 0.32  | 100   |
| scaffold06241 | 1   | 1338 | 1338 | 66.7  | C_unshiu_00009 | 653604 | 652267 | 1338 | 0.13  | 99.48 |
| scaffold06246 | 1   | 1036 | 1036 | 51.67 | C_unshiu_00476 | 192478 | 193511 | 1034 | 0.52  | 99.81 |
| scaffold06250 | 1   | 2004 | 2004 | 100   | C_unshiu_02304 | 6286   | 8282   | 1997 | 6.72  | 98.9  |
| scaffold06251 | 706 | 2004 | 1299 | 64.82 | C_unshiu_00990 | 2947   | 4244   | 1298 | 1.21  | 98.54 |
| scaffold06254 | 1   | 2003 | 2003 | 100   | C_unshiu_01012 | 2360   | 334    | 2027 | 1.94  | 98.17 |
| scaffold06256 | 1   | 2001 | 2001 | 100   | C_unshiu_03010 | 8256   | 6249   | 2008 | 15.91 | 99.05 |
| scaffold06261 | 1   | 1779 | 1779 | 89.08 | C_unshiu_00159 | 219351 | 221129 | 1779 | 0.48  | 99.89 |
| scaffold06264 | 4   | 1988 | 1985 | 99.85 | C_unshiu_02171 | 9079   | 7090   | 1990 | 5.79  | 98.39 |
| scaffold06268 | 1   | 1400 | 1400 | 70.21 | C_unshiu_00458 | 56364  | 57764  | 1401 | 0.68  | 99.57 |
| scaffold06269 | 1   | 1993 | 1993 | 100   | C_unshiu_02367 | 19340  | 21330  | 1991 | 7.13  | 99.7  |
| scaffold06270 | 1   | 1261 | 1261 | 63.27 | C_unshiu_01253 | 10327  | 9067   | 1261 | 1.56  | 99.52 |
| scaffold06273 | 212 | 1989 | 1778 | 89.39 | C_unshiu_00379 | 218197 | 219980 | 1784 | 0.77  | 98.77 |
| scaffold06274 | 1   | 1989 | 1989 | 100   | C_unshiu_00046 | 105541 | 103552 | 1990 | 0.31  | 99.9  |
| scaffold06277 | 1   | 1988 | 1988 | 100   | C_unshiu_00926 | 70615  | 72602  | 1988 | 1.74  | 99.7  |
| scaffold06279 | 910 | 1987 | 1078 | 54.25 | C_unshiu_00565 | 93170  | 92097  | 1074 | 0.61  | 99.63 |
| scaffold06284 | 1   | 1986 | 1986 | 100   | C_unshiu_00399 | 95247  | 93262  | 1986 | 0.89  | 100   |
| scaffold06287 | 772 | 1986 | 1215 | 61.18 | C_unshiu_01279 | 26105  | 27319  | 1215 | 1.54  | 99.59 |
| scaffold06291 | 7   | 1985 | 1979 | 99.7  | C_unshiu_01121 | 65469  | 63497  | 1973 | 2.1   | 98.03 |
| scaffold06292 | 417 | 1976 | 1560 | 78.71 | C_unshiu_00362 | 212464 | 214025 | 1562 | 0.66  | 99.87 |
| scaffold06298 | 1   | 1980 | 1980 | 100   | C_unshiu_00463 | 76508  | 78491  | 1984 | 0.97  | 99.19 |
| scaffold06300 | 773 | 1976 | 1204 | 60.93 | C_unshiu_00360 | 154316 | 155519 | 1204 | 0.51  | 99.5  |
| scaffold06301 | 1   | 1975 | 1975 | 100   | C_unshiu_01170 | 32794  | 34768  | 1975 | 2.23  | 99.75 |
| scaffold06305 | 457 | 1525 | 1069 | 54.15 | C_unshiu_01186 | 259    | 1327   | 1069 | 1.23  | 99.25 |
| scaffold06307 | 762 | 1974 | 1213 | 61.45 | C_unshiu_00912 | 65040  | 63832  | 1209 | 1.04  | 98.11 |
| scaffold06309 | 1   | 1297 | 1297 | 65.84 | C_unshiu_00047 | 410563 | 411874 | 1312 | 0.21  | 98.32 |
| scaffold06311 | 48  | 1971 | 1924 | 97.62 | C_unshiu_00161 | 115022 | 113113 | 1910 | 0.51  | 99.06 |
| scaffold06313 | 1   | 1971 | 1971 | 100   | C_unshiu_00630 | 2045   | 77     | 1969 | 1.22  | 99.64 |
| scaffold06314 | 1   | 1970 | 1970 | 100   | C_unshiu_01051 | 21140  | 19171  | 1970 | 1.97  | 100   |
| scaffold06320 | 1   | 1967 | 1967 | 100   | C_unshiu_00383 | 31994  | 33955  | 1962 | 0.86  | 99.54 |
| scaffold06321 | 34  | 1597 | 1564 | 79.51 | C_unshiu_00348 | 90072  | 88511  | 1562 | 0.63  | 98.91 |
| scaffold06322 | 1   | 1966 | 1966 | 100   | C_unshiu_00154 | 149086 | 151064 | 1979 | 0.52  | 98.13 |
| scaffold06323 | 1   | 1510 | 1510 | 76.84 | C_unshiu_01567 | 23305  | 24819  | 1515 | 2.56  | 99.21 |
| scaffold06324 | 1   | 1966 | 1966 | 100   | C_unshiu_00405 | 61125  | 63090  | 1966 | 0.89  | 100   |
| scaffold06325 | 1   | 1967 | 1967 | 100   | C_unshiu_00981 | 17817  | 15827  | 1991 | 1.83  | 98.39 |
| scaffold06329 | 1   | 1963 | 1963 | 100   | C_unshiu_01331 | 47037  | 45078  | 1960 | 2.61  | 99.69 |
| scaffold06334 | 1   | 1504 | 1504 | 76.62 | C_unshiu_00215 | 88100  | 89605  | 1506 | 0.47  | 99.34 |
| scaffold06342 | 1   | 1940 | 1940 | 99.79 | C_unshiu_01507 | 14116  | 16043  | 1928 | 3.07  | 98.4  |
| scaffold06343 | 1   | 1954 | 1954 | 100   | C_unshiu_00538 | 117377 | 115417 | 1961 | 1.08  | 99.54 |
| scaffold06347 | 1   | 1951 | 1951 | 100   | C_unshiu_00001 | 413363 | 411386 | 1978 | 0.07  | 98.58 |
| scaffold06348 | 1   | 1235 | 1235 | 63.33 | C_unshiu_00929 | 61239  | 62473  | 1235 | 1.09  | 99.51 |
| scaffold06352 | 1   | 1941 | 1941 | 100   | C_unshiu_00080 | 178659 | 180599 | 1941 | 0.39  | 100   |
| scaffold06353 | 1   | 1946 | 1946 | 100   | C_unshiu_02689 | 9185   | 11130  | 1946 | 9.68  | 100   |
| scaffold06358 | 1   | 1263 | 1263 | 65    | C_unshiu_00961 | 51409  | 50144  | 1266 | 1.15  | 99.76 |
| scaffold06360 | 1   | 1942 | 1942 | 100   | C_unshiu_00383 | 43521  | 41580  | 1942 | 0.85  | 99.33 |
| scaffold06362 | 1   | 1942 | 1942 | 100   | C_unshiu_00213 | 258470 | 260410 | 1941 | 0.6   | 98.66 |
| scaffold06363 | 1   | 1590 | 1590 | 81.87 | C_unshiu_00809 | 69619  | 71209  | 1591 | 1.25  | 98.24 |
| scaffold06367 | 1   | 1932 | 1932 | 100   | C_unshiu_02462 | 12676  | 10745  | 1932 | 7.5   | 99.43 |
| scaffold06368 | 1   | 1474 | 1474 | 76.65 | C_unshiu_00642 | 37520  | 36034  | 1487 | 0.94  | 98.45 |
| scaffold06369 | 1   | 1941 | 1941 | 100   | C_unshiu_00279 | 260209 | 258269 | 1941 | 0.7   | 100   |
| scaffold06371 | 904 | 1939 | 1036 | 53.43 | C_unshiu_00610 | 146712 | 145678 | 1035 | 0.63  | 99.52 |

|               |     |      |      |       |                |         |         |      |      |       |
|---------------|-----|------|------|-------|----------------|---------|---------|------|------|-------|
| scaffold06372 | 1   | 1938 | 1938 | 100   | C_unshiu_02061 | 8966    | 7029    | 1938 | 5.07 | 99.69 |
| scaffold06373 | 1   | 1075 | 1075 | 55.5  | C_unshiu_02174 | 23369   | 24443   | 1075 | 3.14 | 99.44 |
| scaffold06374 | 899 | 1938 | 1040 | 53.66 | C_unshiu_01782 | 4996    | 3957    | 1040 | 2.11 | 99.9  |
| scaffold06376 | 183 | 1932 | 1750 | 90.58 | C_unshiu_00520 | 39412   | 37658   | 1755 | 0.95 | 99.49 |
| scaffold06379 | 1   | 1937 | 1937 | 100   | C_unshiu_00907 | 47768   | 45832   | 1937 | 1.66 | 100   |
| scaffold06382 | 1   | 1935 | 1935 | 100   | C_unshiu_00848 | 105631  | 103697  | 1935 | 1.57 | 99.84 |
| scaffold06390 | 1   | 1932 | 1932 | 100   | C_unshiu_00127 | 14765   | 16698   | 1934 | 0.47 | 99.9  |
| scaffold06391 | 1   | 1928 | 1928 | 99.95 | C_unshiu_01572 | 19418   | 21345   | 1928 | 3.26 | 100   |
| scaffold06392 | 1   | 1930 | 1930 | 100   | C_unshiu_01110 | 64620   | 66548   | 1929 | 2.03 | 99.74 |
| scaffold06396 | 125 | 1928 | 1804 | 93.57 | C_unshiu_01384 | 16141   | 17945   | 1805 | 2.53 | 99.17 |
| scaffold06397 | 1   | 1927 | 1927 | 100   | C_unshiu_02092 | 15684   | 13767   | 1918 | 5.21 | 98.6  |
| scaffold06399 | 783 | 1926 | 1144 | 59.4  | C_unshiu_00412 | 153696  | 154848  | 1153 | 0.52 | 98.44 |
| scaffold06400 | 1   | 1925 | 1925 | 100   | C_unshiu_00224 | 59972   | 61919   | 1948 | 0.62 | 98.61 |
| scaffold06401 | 1   | 1925 | 1925 | 100   | C_unshiu_00582 | 101391  | 103315  | 1925 | 1.13 | 99.43 |
| scaffold06402 | 1   | 1925 | 1925 | 100   | C_unshiu_02197 | 17028   | 18952   | 1925 | 5.79 | 100   |
| scaffold06404 | 1   | 1924 | 1924 | 100   | C_unshiu_02106 | 19302   | 21237   | 1936 | 5.34 | 98.61 |
| scaffold06405 | 1   | 1928 | 1928 | 100   | C_unshiu_00631 | 160215  | 158284  | 1932 | 1.2  | 98.81 |
| scaffold06411 | 1   | 1923 | 1923 | 100   | C_unshiu_01636 | 52079   | 50154   | 1926 | 3.46 | 99.48 |
| scaffold06412 | 1   | 1922 | 1922 | 100   | C_unshiu_00240 | 18422   | 16497   | 1926 | 0.64 | 98.49 |
| scaffold06413 | 1   | 1922 | 1922 | 100   | C_unshiu_00773 | 5655    | 7582    | 1928 | 1.46 | 99.12 |
| scaffold06415 | 1   | 1921 | 1921 | 100   | C_unshiu_00231 | 205388  | 203463  | 1926 | 0.63 | 98.39 |
| scaffold06419 | 1   | 1329 | 1329 | 69.25 | C_unshiu_01807 | 43130   | 41803   | 1328 | 2.75 | 98.65 |
| scaffold06420 | 1   | 1537 | 1537 | 80.18 | C_unshiu_00149 | 304286  | 305828  | 1543 | 0.4  | 98.77 |
| scaffold06421 | 1   | 1916 | 1916 | 100   | C_unshiu_00163 | 68126   | 70050   | 1925 | 0.52 | 98.81 |
| scaffold06422 | 1   | 1917 | 1917 | 100   | C_unshiu_00177 | 235024  | 233108  | 1917 | 0.53 | 100   |
| scaffold06424 | 1   | 1914 | 1914 | 99.9  | C_unshiu_01701 | 39480   | 41393   | 1914 | 3.65 | 98.18 |
| scaffold06426 | 171 | 1908 | 1738 | 91.09 | C_unshiu_01658 | 29009   | 27275   | 1735 | 3.17 | 99.08 |
| scaffold06427 | 893 | 1914 | 1022 | 53.4  | C_unshiu_02973 | 4071    | 3052    | 1020 | 7.44 | 98.43 |
| scaffold06430 | 1   | 1912 | 1912 | 100   | C_unshiu_02257 | 9989    | 8078    | 1912 | 6.09 | 98.95 |
| scaffold06431 | 1   | 1912 | 1912 | 100   | C_unshiu_00066 | 208938  | 207010  | 1929 | 0.35 | 98.55 |
| scaffold06433 | 1   | 1227 | 1227 | 64.21 | C_unshiu_00218 | 51057   | 49829   | 1229 | 0.38 | 99.67 |
| scaffold06436 | 12  | 1910 | 1899 | 99.42 | C_unshiu_00293 | 32512   | 34408   | 1897 | 0.7  | 99    |
| scaffold06437 | 1   | 1923 | 1923 | 100   | C_unshiu_00058 | 48530   | 50448   | 1919 | 0.32 | 99.38 |
| scaffold06438 | 1   | 1909 | 1909 | 100   | C_unshiu_00127 | 311403  | 309495  | 1909 | 0.46 | 99.48 |
| scaffold06440 | 1   | 1909 | 1909 | 100   | C_unshiu_00139 | 124202  | 122292  | 1911 | 0.47 | 99.84 |
| scaffold06442 | 1   | 1906 | 1906 | 100   | C_unshiu_01247 | 59723   | 57821   | 1903 | 2.35 | 98.64 |
| scaffold06450 | 1   | 1903 | 1903 | 100   | C_unshiu_02122 | 11139   | 13037   | 1899 | 5.3  | 99.79 |
| scaffold06453 | 1   | 1901 | 1901 | 100   | C_unshiu_00328 | 9578    | 7678    | 1901 | 0.75 | 99.89 |
| scaffold06454 | 813 | 1901 | 1089 | 57.29 | C_unshiu_00127 | 25783   | 24695   | 1089 | 0.26 | 98.99 |
| scaffold06455 | 1   | 1901 | 1901 | 100   | C_unshiu_01000 | 92138   | 90238   | 1901 | 1.79 | 100   |
| scaffold06457 | 1   | 1366 | 1366 | 71.89 | C_unshiu_01125 | 92888   | 91522   | 1367 | 1.46 | 99.78 |
| scaffold06460 | 1   | 1898 | 1898 | 100   | C_unshiu_00907 | 93560   | 95456   | 1897 | 1.63 | 99.05 |
| scaffold06463 | 1   | 1897 | 1897 | 100   | C_unshiu_00356 | 44286   | 46197   | 1912 | 0.81 | 98.43 |
| scaffold06464 | 1   | 1846 | 1846 | 100   | C_unshiu_01810 | 12397   | 10558   | 1840 | 3.82 | 99.24 |
| scaffold06465 | 379 | 1896 | 1518 | 80.06 | C_unshiu_02483 | 21184   | 19668   | 1517 | 6.05 | 98.29 |
| scaffold06470 | 1   | 1053 | 1053 | 55.8  | C_unshiu_02857 | 9880    | 10940   | 1061 | 6.39 | 98.77 |
| scaffold06471 | 153 | 1894 | 1742 | 91.97 | C_unshiu_01012 | 26800   | 25066   | 1735 | 1.66 | 98.97 |
| scaffold06473 | 2   | 1894 | 1893 | 99.95 | C_unshiu_00812 | 82893   | 80999   | 1895 | 1.49 | 99.84 |
| scaffold06474 | 213 | 1894 | 1682 | 88.81 | C_unshiu_00167 | 302652  | 304334  | 1683 | 0.46 | 99.47 |
| scaffold06475 | 1   | 1893 | 1893 | 100   | C_unshiu_02723 | 13476   | 15368   | 1893 | 9.78 | 99.58 |
| scaffold06476 | 1   | 1228 | 1228 | 64.87 | C_unshiu_02972 | 5993    | 4766    | 1228 | 8.93 | 99.92 |
| scaffold06477 | 2   | 1892 | 1891 | 99.95 | C_unshiu_01601 | 34956   | 36844   | 1889 | 3.29 | 99.1  |
| scaffold06478 | 381 | 1892 | 1512 | 79.92 | C_unshiu_01318 | 8072    | 9587    | 1516 | 2    | 98.09 |
| scaffold06482 | 1   | 1887 | 1887 | 99.95 | C_unshiu_02453 | 19335   | 17454   | 1882 | 7.2  | 98.1  |
| scaffold06483 | 1   | 1891 | 1891 | 100   | C_unshiu_00105 | 77063   | 75175   | 1889 | 0.42 | 99.68 |
| scaffold06490 | 1   | 1886 | 1886 | 100   | C_unshiu_00371 | 9415    | 11300   | 1886 | 0.81 | 99.84 |
| scaffold06491 | 520 | 1889 | 1370 | 72.53 | C_unshiu_00630 | 33197   | 31831   | 1367 | 0.85 | 98.69 |
| scaffold06492 | 579 | 1888 | 1310 | 69.39 | C_unshiu_01212 | 18640   | 19954   | 1315 | 1.56 | 99.47 |
| scaffold06493 | 1   | 1888 | 1888 | 100   | C_unshiu_00051 | 19092   | 20981   | 1890 | 0.32 | 99.79 |
| scaffold06494 | 1   | 1769 | 1769 | 93.9  | C_unshiu_00649 | 152942  | 154705  | 1764 | 1.12 | 98.81 |
| scaffold06494 | 74  | 1884 | 1811 | 96.13 | C_unshiu_02172 | 21693   | 19884   | 1810 | 5.28 | 98.35 |
| scaffold06495 | 2   | 1887 | 1886 | 99.95 | C_unshiu_01952 | 11450   | 9571    | 1880 | 4.42 | 99.21 |
| scaffold06497 | 1   | 1886 | 1886 | 100   | C_unshiu_01670 | 42637   | 40753   | 1885 | 3.48 | 98.83 |
| scaffold06499 | 3   | 1882 | 1880 | 99.89 | C_unshiu_01252 | 56850   | 54969   | 1882 | 2.33 | 99.79 |
| scaffold06503 | 1   | 1870 | 1870 | 100   | C_unshiu_02391 | 22448   | 24328   | 1881 | 6.85 | 98.94 |
| scaffold06506 | 1   | 1882 | 1882 | 100   | C_unshiu_00011 | 541015  | 539113  | 1903 | 0.2  | 98.79 |
| scaffold06510 | 1   | 1881 | 1881 | 100   | C_unshiu_00399 | 2297    | 4177    | 1881 | 0.84 | 100   |
| scaffold06511 | 1   | 1880 | 1880 | 100   | C_unshiu_00680 | 82510   | 80618   | 1893 | 1.27 | 99.05 |
| scaffold06517 | 1   | 1877 | 1877 | 100   | C_unshiu_01250 | 53927   | 52051   | 1877 | 2.32 | 100   |
| scaffold06518 | 336 | 1872 | 1537 | 82.1  | C_unshiu_00671 | 42236   | 40694   | 1543 | 1.02 | 98.64 |
| scaffold06524 | 1   | 1875 | 1875 | 100   | C_unshiu_00447 | 125382  | 123508  | 1875 | 0.9  | 100   |
| scaffold06526 | 1   | 1139 | 1139 | 60.78 | C_unshiu_01019 | 101145  | 102278  | 1134 | 1.09 | 98.33 |
| scaffold06527 | 10  | 1642 | 1633 | 87.14 | C_unshiu_00001 | 1136050 | 1137688 | 1639 | 0.06 | 98.84 |
| scaffold06529 | 1   | 1875 | 1875 | 100   | C_unshiu_01317 | 64932   | 63047   | 1886 | 2.49 | 98.52 |
| scaffold06530 | 1   | 1518 | 1518 | 81.09 | C_unshiu_02164 | 20121   | 21638   | 1518 | 4.39 | 100   |
| scaffold06533 | 1   | 1871 | 1871 | 100   | C_unshiu_00244 | 263130  | 261260  | 1871 | 0.62 | 99.95 |
| scaffold06535 | 1   | 1869 | 1869 | 100   | C_unshiu_00418 | 147602  | 149480  | 1879 | 0.86 | 98.09 |
| scaffold06537 | 3   | 1869 | 1867 | 99.89 | C_unshiu_00068 | 232340  | 230473  | 1868 | 0.35 | 99.95 |
| scaffold06541 | 765 | 1867 | 1103 | 59.08 | C_unshiu_00584 | 1393    | 291     | 1103 | 0.65 | 100   |

|               |     |      |      |       |                |        |        |      |       |       |
|---------------|-----|------|------|-------|----------------|--------|--------|------|-------|-------|
| scaffold06542 | 1   | 1192 | 1192 | 63.88 | C_unshiu_00046 | 229667 | 228472 | 1196 | 0.19  | 98.83 |
| scaffold06547 | 1   | 1863 | 1863 | 100   | C_unshiu_00035 | 639115 | 637254 | 1862 | 0.27  | 99.95 |
| scaffold06549 | 1   | 1862 | 1862 | 100   | C_unshiu_01420 | 46508  | 48369  | 1862 | 2.68  | 100   |
| scaffold06552 | 1   | 1791 | 1791 | 96.24 | C_unshiu_02172 | 9848   | 8045   | 1804 | 5.26  | 98.67 |
| scaffold06554 | 1   | 1862 | 1862 | 100   | C_unshiu_00374 | 113956 | 115837 | 1882 | 0.81  | 98.83 |
| scaffold06559 | 1   | 1859 | 1859 | 100   | C_unshiu_00239 | 120629 | 122488 | 1860 | 0.61  | 99.95 |
| scaffold06561 | 1   | 1866 | 1866 | 100   | C_unshiu_00601 | 18150  | 20006  | 1857 | 1.11  | 98.34 |
| scaffold06565 | 1   | 1857 | 1857 | 100   | C_unshiu_00147 | 237494 | 235638 | 1857 | 0.48  | 99.95 |
| scaffold06567 | 788 | 1856 | 1069 | 57.6  | C_unshiu_00280 | 72674  | 71603  | 1072 | 0.39  | 99.44 |
| scaffold06568 | 1   | 1854 | 1854 | 100   | C_unshiu_00310 | 182041 | 180187 | 1855 | 0.71  | 99.89 |
| scaffold06569 | 612 | 1829 | 1218 | 66.59 | C_unshiu_00498 | 113855 | 115071 | 1217 | 0.63  | 99.34 |
| scaffold06570 | 1   | 1855 | 1855 | 100   | C_unshiu_00806 | 87829  | 85976  | 1854 | 1.45  | 99.62 |
| scaffold06574 | 120 | 1552 | 1433 | 77.25 | C_unshiu_00736 | 63955  | 65388  | 1434 | 1.04  | 99.93 |
| scaffold06575 | 39  | 1854 | 1816 | 97.95 | C_unshiu_00310 | 220692 | 218877 | 1816 | 0.7   | 100   |
| scaffold06576 | 1   | 1194 | 1194 | 64.54 | C_unshiu_00790 | 101604 | 100411 | 1194 | 0.92  | 99.33 |
| scaffold06577 | 9   | 1851 | 1843 | 99.57 | C_unshiu_02727 | 14756  | 16598  | 1843 | 9.53  | 99.4  |
| scaffold06578 | 1   | 1852 | 1852 | 100   | C_unshiu_02470 | 22070  | 20222  | 1849 | 7.26  | 99.51 |
| scaffold06580 | 1   | 1851 | 1851 | 100   | C_unshiu_01176 | 13834  | 15684  | 1851 | 2.11  | 100   |
| scaffold06584 | 1   | 1849 | 1849 | 100   | C_unshiu_00732 | 69085  | 67237  | 1849 | 1.33  | 99.62 |
| scaffold06585 | 261 | 1846 | 1586 | 85.92 | C_unshiu_02655 | 1      | 1592   | 1592 | 7.64  | 99.06 |
| scaffold06589 | 1   | 1846 | 1846 | 100   | C_unshiu_00066 | 525745 | 523902 | 1844 | 0.33  | 98.54 |
| scaffold06590 | 1   | 1845 | 1845 | 100   | C_unshiu_00069 | 343101 | 344954 | 1854 | 0.35  | 98.87 |
| scaffold06591 | 4   | 1604 | 1601 | 86.78 | C_unshiu_01162 | 66340  | 64738  | 1603 | 1.79  | 99.63 |
| scaffold06596 | 67  | 1842 | 1776 | 96.42 | C_unshiu_00467 | 138640 | 140415 | 1776 | 0.88  | 100   |
| scaffold06600 | 3   | 1840 | 1838 | 99.89 | C_unshiu_02957 | 8921   | 7084   | 1838 | 12.95 | 100   |
| scaffold06605 | 1   | 1836 | 1836 | 100   | C_unshiu_00683 | 128725 | 126890 | 1836 | 1.24  | 100   |
| scaffold06607 | 1   | 1835 | 1835 | 100   | C_unshiu_01395 | 30361  | 28529  | 1833 | 2.59  | 98.58 |
| scaffold06615 | 1   | 1111 | 1111 | 60.64 | C_unshiu_00578 | 85117  | 86230  | 1114 | 0.65  | 98.66 |
| scaffold06617 | 1   | 1708 | 1708 | 93.33 | C_unshiu_01293 | 29623  | 27904  | 1720 | 2.2   | 98.37 |
| scaffold06618 | 26  | 1745 | 1720 | 93.89 | C_unshiu_00421 | 146895 | 148617 | 1723 | 0.79  | 99.13 |
| scaffold06620 | 37  | 1829 | 1793 | 98.03 | C_unshiu_00040 | 293527 | 295319 | 1793 | 0.27  | 99.94 |
| scaffold06621 | 434 | 1830 | 1397 | 76.34 | C_unshiu_01030 | 3864   | 2469   | 1396 | 1.36  | 99.64 |
| scaffold06622 | 1   | 1143 | 1143 | 62.49 | C_unshiu_00080 | 174479 | 173336 | 1144 | 0.23  | 98.95 |
| scaffold06628 | 1   | 1824 | 1824 | 100   | C_unshiu_00649 | 90752  | 92569  | 1818 | 1.16  | 98.58 |
| scaffold06630 | 1   | 1825 | 1825 | 100   | C_unshiu_00143 | 385270 | 387095 | 1826 | 0.46  | 99.95 |
| scaffold06631 | 1   | 1821 | 1821 | 99.78 | C_unshiu_00626 | 96441  | 98250  | 1810 | 1.12  | 98.79 |
| scaffold06633 | 1   | 1823 | 1823 | 100   | C_unshiu_00623 | 12265  | 10439  | 1827 | 1.13  | 99.34 |
| scaffold06637 | 1   | 1821 | 1821 | 100   | C_unshiu_00344 | 230717 | 228897 | 1821 | 0.73  | 99.67 |
| scaffold06638 | 1   | 1821 | 1821 | 100   | C_unshiu_00881 | 43818  | 45637  | 1820 | 1.53  | 99.84 |
| scaffold06639 | 1   | 1820 | 1820 | 100   | C_unshiu_01249 | 75609  | 77410  | 1802 | 2.23  | 98.19 |
| scaffold06640 | 631 | 1813 | 1183 | 65.25 | C_unshiu_02735 | 12778  | 11584  | 1195 | 6.21  | 98.66 |
| scaffold06641 | 1   | 1820 | 1820 | 100   | C_unshiu_00329 | 179564 | 181379 | 1816 | 0.72  | 99.23 |
| scaffold06646 | 1   | 1818 | 1818 | 100   | C_unshiu_00852 | 6064   | 7881   | 1818 | 1.48  | 100   |
| scaffold06650 | 2   | 1815 | 1814 | 99.94 | C_unshiu_00144 | 236848 | 238630 | 1783 | 0.45  | 98.13 |
| scaffold06655 | 1   | 1811 | 1811 | 99.83 | C_unshiu_00008 | 728547 | 726732 | 1816 | 0.17  | 98.95 |
| scaffold06657 | 1   | 1811 | 1811 | 100   | C_unshiu_00302 | 25362  | 27140  | 1779 | 0.67  | 98.23 |
| scaffold06658 | 1   | 1811 | 1811 | 100   | C_unshiu_00805 | 53901  | 55711  | 1811 | 1.42  | 99.89 |
| scaffold06659 | 4   | 1811 | 1808 | 99.83 | C_unshiu_00481 | 30659  | 28852  | 1808 | 0.92  | 98.4  |
| scaffold06662 | 1   | 1731 | 1731 | 95.58 | C_unshiu_01234 | 19489  | 17760  | 1730 | 2.11  | 99.65 |
| scaffold06665 | 559 | 1809 | 1251 | 69.15 | C_unshiu_01081 | 56853  | 55603  | 1251 | 1.28  | 99.84 |
| scaffold06671 | 1   | 1032 | 1032 | 57.11 | C_unshiu_01553 | 43803  | 42772  | 1032 | 1.71  | 100   |
| scaffold06672 | 1   | 1194 | 1194 | 66.19 | C_unshiu_00148 | 273372 | 274565 | 1194 | 0.31  | 100   |
| scaffold06673 | 665 | 1806 | 1142 | 63.23 | C_unshiu_00164 | 332934 | 334075 | 1142 | 0.31  | 100   |
| scaffold06676 | 1   | 1803 | 1803 | 100   | C_unshiu_00042 | 262422 | 264255 | 1834 | 0.29  | 98.2  |
| scaffold06679 | 1   | 1803 | 1803 | 100   | C_unshiu_02189 | 15962  | 14157  | 1806 | 5.37  | 98.73 |
| scaffold06680 | 1   | 1148 | 1148 | 63.67 | C_unshiu_00020 | 573624 | 572475 | 1150 | 0.15  | 99.39 |
| scaffold06681 | 1   | 1804 | 1804 | 100   | C_unshiu_00186 | 203399 | 201595 | 1805 | 0.52  | 99.06 |
| scaffold06684 | 3   | 1150 | 1148 | 63.78 | C_unshiu_00614 | 82090  | 83239  | 1150 | 0.7   | 98.96 |
| scaffold06686 | 439 | 1800 | 1362 | 75.67 | C_unshiu_00348 | 149919 | 148558 | 1362 | 0.55  | 98.6  |
| scaffold06691 | 1   | 1797 | 1797 | 100   | C_unshiu_00344 | 235638 | 237435 | 1798 | 0.73  | 99.78 |
| scaffold06693 | 1   | 1797 | 1797 | 100   | C_unshiu_00056 | 77907  | 76134  | 1774 | 0.3   | 98    |
| scaffold06703 | 1   | 1154 | 1154 | 64.4  | C_unshiu_00290 | 232088 | 233241 | 1154 | 0.43  | 98.18 |
| scaffold06704 | 1   | 1791 | 1791 | 100   | C_unshiu_00702 | 39288  | 41080  | 1793 | 1.25  | 99.61 |
| scaffold06715 | 565 | 1785 | 1221 | 68.4  | C_unshiu_02224 | 9172   | 10385  | 1214 | 3.74  | 98.12 |
| scaffold06716 | 1   | 1787 | 1787 | 100   | C_unshiu_00632 | 101416 | 99630  | 1787 | 1.11  | 98.66 |
| scaffold06718 | 57  | 1260 | 1204 | 67.34 | C_unshiu_00706 | 36777  | 37980  | 1204 | 0.84  | 100   |
| scaffold06721 | 1   | 1786 | 1786 | 100   | C_unshiu_00481 | 8827   | 7041   | 1787 | 0.9   | 99.78 |
| scaffold06722 | 1   | 1786 | 1786 | 100   | C_unshiu_00639 | 11622  | 13392  | 1771 | 1.12  | 98.43 |
| scaffold06726 | 1   | 1780 | 1780 | 99.89 | C_unshiu_01438 | 37813  | 39592  | 1780 | 2.63  | 99.61 |
| scaffold06728 | 1   | 1782 | 1782 | 100   | C_unshiu_00501 | 148400 | 146612 | 1789 | 0.94  | 98.77 |
| scaffold06730 | 1   | 1781 | 1781 | 100   | C_unshiu_00199 | 19290  | 21072  | 1783 | 0.53  | 98.88 |
| scaffold06731 | 1   | 1781 | 1781 | 100   | C_unshiu_00085 | 417217 | 418997 | 1781 | 0.38  | 99.94 |
| scaffold06732 | 3   | 1146 | 1144 | 64.27 | C_unshiu_00541 | 109741 | 108598 | 1144 | 0.63  | 100   |
| scaffold06735 | 1   | 1779 | 1779 | 100   | C_unshiu_00314 | 61501  | 59714  | 1788 | 0.69  | 99.05 |
| scaffold06741 | 1   | 1777 | 1777 | 100   | C_unshiu_01882 | 29302  | 27533  | 1770 | 3.91  | 99.1  |
| scaffold06744 | 1   | 1174 | 1174 | 66.1  | C_unshiu_00931 | 101006 | 102168 | 1163 | 1.02  | 98.47 |
| scaffold06745 | 1   | 1775 | 1775 | 100   | C_unshiu_00271 | 202686 | 204458 | 1773 | 0.63  | 99.61 |
| scaffold06746 | 714 | 1765 | 1052 | 59.6  | C_unshiu_00163 | 149682 | 150734 | 1053 | 0.28  | 99.43 |
| scaffold06751 | 1   | 1771 | 1771 | 100   | C_unshiu_01134 | 34975  | 33206  | 1770 | 1.92  | 98.76 |

|               |     |      |      |       |                |        |        |      |       |       |
|---------------|-----|------|------|-------|----------------|--------|--------|------|-------|-------|
| scaffold06752 | 1   | 1770 | 1770 | 100   | C_unshiu_00448 | 169808 | 168038 | 1771 | 0.85  | 99.32 |
| scaffold06753 | 1   | 1770 | 1770 | 100   | C_unshiu_01615 | 3215   | 4989   | 1775 | 3.12  | 99.16 |
| scaffold06757 | 1   | 1769 | 1769 | 100   | C_unshiu_00288 | 119171 | 120939 | 1769 | 0.65  | 99.94 |
| scaffold06758 | 1   | 1768 | 1768 | 100   | C_unshiu_00720 | 103978 | 105745 | 1768 | 1.25  | 98.64 |
| scaffold06768 | 742 | 1766 | 1025 | 58.04 | C_unshiu_01921 | 21306  | 20280  | 1027 | 2.34  | 98.83 |
| scaffold06770 | 672 | 1766 | 1095 | 62    | C_unshiu_01357 | 62698  | 61605  | 1094 | 1.48  | 99.73 |
| scaffold06772 | 579 | 1765 | 1187 | 67.25 | C_unshiu_00580 | 87973  | 89159  | 1187 | 0.69  | 99.66 |
| scaffold06773 | 2   | 1535 | 1534 | 86.91 | C_unshiu_01633 | 10143  | 8608   | 1536 | 2.75  | 99.22 |
| scaffold06776 | 1   | 1765 | 1765 | 100   | C_unshiu_00144 | 360666 | 362442 | 1777 | 0.45  | 98.09 |
| scaffold06779 | 1   | 1011 | 1011 | 57.35 | C_unshiu_00510 | 58059  | 57051  | 1009 | 0.54  | 99.11 |
| scaffold06780 | 1   | 1762 | 1762 | 100   | C_unshiu_00476 | 29833  | 31593  | 1761 | 0.88  | 98.87 |
| scaffold06787 | 1   | 1759 | 1759 | 100   | C_unshiu_00128 | 197686 | 195928 | 1759 | 0.43  | 100   |
| scaffold06789 | 1   | 1438 | 1438 | 81.75 | C_unshiu_00095 | 403892 | 405310 | 1419 | 0.31  | 98.06 |
| scaffold06795 | 1   | 1758 | 1758 | 100   | C_unshiu_00519 | 127496 | 129253 | 1758 | 0.95  | 99.94 |
| scaffold06796 | 1   | 1756 | 1756 | 100   | C_unshiu_00335 | 150986 | 149235 | 1752 | 0.7   | 98.98 |
| scaffold06804 | 10  | 1757 | 1748 | 99.49 | C_unshiu_00009 | 969686 | 967935 | 1752 | 0.17  | 98.29 |
| scaffold06810 | 1   | 1754 | 1754 | 100   | C_unshiu_00421 | 78414  | 76676  | 1739 | 0.8   | 98.06 |
| scaffold06812 | 1   | 1754 | 1754 | 100   | C_unshiu_00852 | 8083   | 9849   | 1767 | 1.44  | 98.87 |
| scaffold06814 | 22  | 1576 | 1555 | 92.18 | C_unshiu_00777 | 74     | 1629   | 1556 | 1.18  | 99.29 |
| scaffold06816 | 1   | 1753 | 1753 | 100   | C_unshiu_01429 | 44378  | 46136  | 1759 | 2.58  | 99.26 |
| scaffold06819 | 1   | 1354 | 1354 | 77.33 | C_unshiu_00471 | 113190 | 111833 | 1358 | 0.68  | 98.09 |
| scaffold06820 | 1   | 1362 | 1362 | 77.78 | C_unshiu_00238 | 29123  | 30491  | 1369 | 0.45  | 98.32 |
| scaffold06821 | 1   | 1128 | 1128 | 64.38 | C_unshiu_01255 | 39931  | 38804  | 1128 | 1.4   | 99.91 |
| scaffold06822 | 1   | 1280 | 1280 | 73.18 | C_unshiu_01197 | 16391  | 15111  | 1281 | 1.49  | 99.84 |
| scaffold06823 | 1   | 1749 | 1749 | 100   | C_unshiu_00330 | 235065 | 236812 | 1748 | 0.69  | 99.71 |
| scaffold06826 | 1   | 1313 | 1313 | 75.11 | C_unshiu_01435 | 27808  | 26494  | 1315 | 1.93  | 99.62 |
| scaffold06826 | 109 | 1748 | 1640 | 93.82 | C_unshiu_00169 | 57337  | 55696  | 1642 | 0.45  | 98.66 |
| scaffold06830 | 1   | 1746 | 1746 | 100   | C_unshiu_00041 | 142532 | 140777 | 1756 | 0.27  | 99.32 |
| scaffold06834 | 50  | 1368 | 1319 | 75.63 | C_unshiu_01137 | 38716  | 37395  | 1322 | 1.43  | 98.56 |
| scaffold06839 | 1   | 1741 | 1741 | 100   | C_unshiu_01035 | 99872  | 98124  | 1749 | 1.7   | 98.91 |
| scaffold06846 | 1   | 1739 | 1739 | 100   | C_unshiu_01185 | 45557  | 47295  | 1739 | 2     | 100   |
| scaffold06847 | 1   | 1739 | 1739 | 100   | C_unshiu_00018 | 488884 | 487153 | 1732 | 0.2   | 99.48 |
| scaffold06848 | 541 | 1738 | 1198 | 68.93 | C_unshiu_00040 | 87345  | 86148  | 1198 | 0.18  | 100   |
| scaffold06851 | 218 | 1750 | 1533 | 87.55 | C_unshiu_00082 | 190326 | 188801 | 1526 | 0.32  | 98.83 |
| scaffold06853 | 1   | 1233 | 1233 | 70.94 | C_unshiu_00135 | 380332 | 381567 | 1236 | 0.3   | 99.03 |
| scaffold06855 | 389 | 1737 | 1349 | 77.66 | C_unshiu_00018 | 180698 | 182047 | 1350 | 0.16  | 99.85 |
| scaffold06859 | 519 | 1736 | 1218 | 70.16 | C_unshiu_00224 | 98882  | 97650  | 1233 | 0.39  | 98.54 |
| scaffold06861 | 1   | 1086 | 1086 | 62.88 | C_unshiu_02745 | 18010  | 19100  | 1091 | 5.71  | 98.53 |
| scaffold06862 | 1   | 1735 | 1735 | 100   | C_unshiu_01800 | 37225  | 38959  | 1735 | 3.58  | 99.83 |
| scaffold06863 | 1   | 1735 | 1735 | 100   | C_unshiu_00308 | 105252 | 106986 | 1735 | 0.66  | 100   |
| scaffold06864 | 1   | 1735 | 1735 | 100   | C_unshiu_00158 | 222139 | 220401 | 1739 | 0.46  | 99.25 |
| scaffold06865 | 1   | 1106 | 1106 | 63.82 | C_unshiu_00374 | 95713  | 94607  | 1107 | 0.48  | 99.73 |
| scaffold06871 | 1   | 1732 | 1732 | 100   | C_unshiu_01041 | 30602  | 32334  | 1733 | 1.7   | 98.11 |
| scaffold06873 | 1   | 1152 | 1152 | 66.47 | C_unshiu_00889 | 104642 | 103493 | 1150 | 0.97  | 99.48 |
| scaffold06878 | 1   | 1730 | 1730 | 100   | C_unshiu_00207 | 206784 | 208514 | 1731 | 0.52  | 99.6  |
| scaffold06879 | 263 | 1727 | 1465 | 84.83 | C_unshiu_00065 | 361666 | 363128 | 1463 | 0.26  | 98.84 |
| scaffold06881 | 1   | 1729 | 1729 | 100   | C_unshiu_00026 | 146592 | 148320 | 1729 | 0.23  | 99.88 |
| scaffold06884 | 1   | 1728 | 1728 | 100   | C_unshiu_00400 | 196809 | 198536 | 1728 | 0.78  | 100   |
| scaffold06885 | 1   | 1721 | 1721 | 99.71 | C_unshiu_01284 | 23656  | 25367  | 1712 | 2.18  | 98.95 |
| scaffold06886 | 1   | 1354 | 1354 | 78.49 | C_unshiu_01785 | 19494  | 20847  | 1354 | 2.76  | 98.15 |
| scaffold06887 | 1   | 1726 | 1726 | 100   | C_unshiu_02871 | 8193   | 6469   | 1725 | 10.51 | 98.15 |
| scaffold06888 | 1   | 1725 | 1725 | 100   | C_unshiu_00647 | 29600  | 31324  | 1725 | 1.09  | 99.83 |
| scaffold06893 | 1   | 1315 | 1315 | 76.32 | C_unshiu_00200 | 280882 | 279568 | 1315 | 0.39  | 100   |
| scaffold06893 | 79  | 1723 | 1645 | 95.47 | C_unshiu_00774 | 125841 | 124195 | 1647 | 1.25  | 98.18 |
| scaffold06895 | 1   | 1721 | 1721 | 100   | C_unshiu_00024 | 724966 | 726686 | 1721 | 0.22  | 100   |
| scaffold06896 | 355 | 1720 | 1366 | 79.42 | C_unshiu_01120 | 82839  | 84204  | 1366 | 1.46  | 99.19 |
| scaffold06901 | 36  | 1719 | 1684 | 97.96 | C_unshiu_00021 | 248454 | 246768 | 1687 | 0.22  | 99.7  |
| scaffold06902 | 1   | 1719 | 1719 | 100   | C_unshiu_01924 | 40194  | 41908  | 1715 | 3.91  | 99.59 |
| scaffold06903 | 1   | 1718 | 1718 | 100   | C_unshiu_00092 | 94530  | 96244  | 1715 | 0.37  | 98.95 |
| scaffold06906 | 1   | 1718 | 1718 | 100   | C_unshiu_00443 | 76820  | 78541  | 1722 | 0.82  | 98.66 |
| scaffold06908 | 1   | 1047 | 1047 | 60.98 | C_unshiu_00379 | 52276  | 53323  | 1048 | 0.45  | 99.33 |
| scaffold06910 | 99  | 1680 | 1582 | 92.19 | C_unshiu_00269 | 67138  | 65554  | 1585 | 0.56  | 98.61 |
| scaffold06917 | 1   | 1713 | 1713 | 100   | C_unshiu_00045 | 38018  | 36305  | 1714 | 0.27  | 99.71 |
| scaffold06921 | 1   | 1712 | 1712 | 100   | C_unshiu_00209 | 4971   | 3260   | 1712 | 0.52  | 99.59 |
| scaffold06922 | 1   | 1712 | 1712 | 100   | C_unshiu_01726 | 29053  | 30768  | 1716 | 3.32  | 99.48 |
| scaffold06923 | 1   | 1711 | 1711 | 100   | C_unshiu_00286 | 48935  | 50650  | 1716 | 0.63  | 99.36 |
| scaffold06928 | 1   | 1711 | 1711 | 100   | C_unshiu_00944 | 17450  | 15740  | 1711 | 1.53  | 100   |
| scaffold06932 | 1   | 1080 | 1080 | 63.16 | C_unshiu_02103 | 18236  | 19315  | 1080 | 2.97  | 100   |
| scaffold06933 | 1   | 1706 | 1706 | 100   | C_unshiu_01731 | 7238   | 5525   | 1714 | 3.33  | 98.02 |
| scaffold06937 | 1   | 1351 | 1351 | 79.38 | C_unshiu_00739 | 133957 | 132625 | 1333 | 0.97  | 98.67 |
| scaffold06939 | 1   | 1709 | 1709 | 100   | C_unshiu_00505 | 172269 | 173964 | 1696 | 0.89  | 98.13 |
| scaffold06940 | 1   | 1130 | 1130 | 66.24 | C_unshiu_00257 | 265224 | 266355 | 1132 | 0.39  | 99.65 |
| scaffold06944 | 28  | 1707 | 1680 | 98.42 | C_unshiu_00004 | 234766 | 233070 | 1697 | 0.14  | 98.35 |
| scaffold06946 | 1   | 1272 | 1272 | 74.47 | C_unshiu_00173 | 286201 | 284937 | 1265 | 0.35  | 98.12 |
| scaffold06950 | 4   | 1707 | 1704 | 99.82 | C_unshiu_00135 | 162628 | 160915 | 1714 | 0.42  | 98.78 |
| scaffold06951 | 1   | 1707 | 1707 | 100   | C_unshiu_01207 | 3525   | 5231   | 1707 | 2.01  | 100   |
| scaffold06955 | 1   | 1709 | 1709 | 100   | C_unshiu_00265 | 250755 | 252464 | 1710 | 0.6   | 99.94 |
| scaffold06957 | 1   | 1704 | 1704 | 100   | C_unshiu_01975 | 38395  | 40098  | 1704 | 4.1   | 99.94 |
| scaffold06958 | 483 | 1702 | 1220 | 71.68 | C_unshiu_00982 | 53046  | 51835  | 1212 | 1.12  | 98.69 |

|               |     |      |      |       |                |         |         |      |      |       |
|---------------|-----|------|------|-------|----------------|---------|---------|------|------|-------|
| scaffold06960 | 1   | 1500 | 1500 | 88.03 | C_unshiu_00048 | 614677  | 613178  | 1500 | 0.24 | 99.33 |
| scaffold06960 | 691 | 1704 | 1014 | 59.51 | C_unshiu_00074 | 119776  | 118767  | 1010 | 0.2  | 98.72 |
| scaffold06963 | 1   | 1704 | 1704 | 100   | C_unshiu_01254 | 62517   | 64220   | 1704 | 2.11 | 99.94 |
| scaffold06964 | 1   | 1339 | 1339 | 78.67 | C_unshiu_01008 | 64946   | 63609   | 1338 | 1.27 | 99.63 |
| scaffold06967 | 1   | 1700 | 1700 | 100   | C_unshiu_01273 | 59835   | 58136   | 1700 | 2.14 | 99.94 |
| scaffold06969 | 1   | 1700 | 1700 | 100   | C_unshiu_01099 | 69224   | 70923   | 1700 | 1.77 | 100   |
| scaffold06973 | 1   | 1694 | 1694 | 99.76 | C_unshiu_00351 | 134365  | 136059  | 1695 | 0.71 | 99.82 |
| scaffold06975 | 1   | 1055 | 1055 | 62.13 | C_unshiu_00028 | 354570  | 353516  | 1055 | 0.15 | 100   |
| scaffold06976 | 1   | 1698 | 1698 | 100   | C_unshiu_02220 | 22098   | 23790   | 1693 | 5.2  | 99.59 |
| scaffold06981 | 1   | 1696 | 1696 | 100   | C_unshiu_00133 | 193682  | 191987  | 1696 | 0.41 | 99.23 |
| scaffold06985 | 1   | 1694 | 1694 | 100   | C_unshiu_00001 | 2632641 | 2634330 | 1690 | 0.06 | 98.76 |
| scaffold06987 | 1   | 1085 | 1085 | 63.97 | C_unshiu_00335 | 132832  | 131748  | 1085 | 0.43 | 98.71 |
| scaffold06989 | 1   | 1692 | 1692 | 100   | C_unshiu_00415 | 199749  | 198058  | 1692 | 0.77 | 99.94 |
| scaffold06993 | 1   | 1691 | 1691 | 100   | C_unshiu_00529 | 84356   | 82666   | 1691 | 0.92 | 100   |
| scaffold06996 | 1   | 1691 | 1691 | 100   | C_unshiu_01533 | 60729   | 59038   | 1692 | 2.75 | 99.47 |
| scaffold06997 | 1   | 1691 | 1691 | 100   | C_unshiu_01384 | 22878   | 21188   | 1691 | 2.37 | 100   |
| scaffold06999 | 1   | 1690 | 1690 | 100   | C_unshiu_00994 | 59033   | 57344   | 1690 | 1.58 | 99.64 |
| scaffold07001 | 1   | 1690 | 1690 | 100   | C_unshiu_00265 | 171745  | 170056  | 1690 | 0.59 | 99.88 |
| scaffold07003 | 1   | 1689 | 1689 | 100   | C_unshiu_01375 | 58056   | 59743   | 1688 | 2.34 | 98.11 |
| scaffold07004 | 1   | 1688 | 1688 | 100   | C_unshiu_00410 | 192531  | 190844  | 1688 | 0.76 | 100   |
| scaffold07005 | 1   | 1687 | 1687 | 100   | C_unshiu_02112 | 7478    | 5790    | 1689 | 4.67 | 99.53 |
| scaffold07006 | 1   | 1687 | 1687 | 100   | C_unshiu_01073 | 12054   | 10365   | 1690 | 1.71 | 99.41 |
| scaffold07009 | 1   | 1432 | 1432 | 85.04 | C_unshiu_01764 | 30016   | 31447   | 1432 | 2.87 | 99.93 |
| scaffold07010 | 1   | 1684 | 1684 | 100   | C_unshiu_02608 | 17511   | 19194   | 1684 | 7.69 | 99.7  |
| scaffold07011 | 1   | 1288 | 1288 | 76.53 | C_unshiu_00402 | 174043  | 175329  | 1287 | 0.58 | 99.07 |
| scaffold07018 | 1   | 1410 | 1410 | 83.88 | C_unshiu_00456 | 49365   | 50771   | 1407 | 0.69 | 98.09 |
| scaffold07021 | 1   | 1681 | 1681 | 100   | C_unshiu_00472 | 75315   | 73635   | 1681 | 0.84 | 99.94 |
| scaffold07027 | 1   | 1680 | 1680 | 100   | C_unshiu_00902 | 69911   | 71590   | 1680 | 1.44 | 98.63 |
| scaffold07028 | 1   | 1680 | 1680 | 100   | C_unshiu_00162 | 126080  | 124398  | 1683 | 0.45 | 99.82 |
| scaffold07031 | 1   | 1679 | 1679 | 100   | C_unshiu_00903 | 4341    | 6029    | 1689 | 1.45 | 98.76 |
| scaffold07035 | 588 | 1677 | 1090 | 65    | C_unshiu_00018 | 485348  | 486437  | 1090 | 0.13 | 100   |
| scaffold07038 | 27  | 1497 | 1471 | 87.77 | C_unshiu_00060 | 6450    | 4980    | 1471 | 0.25 | 98.98 |
| scaffold07039 | 10  | 1675 | 1666 | 99.46 | C_unshiu_00028 | 90671   | 89006   | 1666 | 0.23 | 99.4  |
| scaffold07044 | 1   | 1674 | 1674 | 100   | C_unshiu_00767 | 70082   | 71755   | 1674 | 1.25 | 98.87 |
| scaffold07048 | 1   | 1673 | 1673 | 100   | C_unshiu_00009 | 631408  | 629736  | 1673 | 0.16 | 100   |
| scaffold07049 | 1   | 1673 | 1673 | 100   | C_unshiu_02483 | 13680   | 12007   | 1674 | 6.67 | 99.7  |
| scaffold07055 | 55  | 1638 | 1584 | 94.85 | C_unshiu_00427 | 79076   | 80655   | 1580 | 0.73 | 99.18 |
| scaffold07056 | 1   | 1670 | 1670 | 100   | C_unshiu_01367 | 60569   | 62238   | 1670 | 2.28 | 100   |
| scaffold07061 | 1   | 1667 | 1667 | 100   | C_unshiu_01952 | 23552   | 25218   | 1667 | 3.92 | 100   |
| scaffold07063 | 15  | 1627 | 1613 | 98.41 | C_unshiu_01723 | 8302    | 9916    | 1615 | 3.12 | 99.88 |
| scaffold07066 | 1   | 1663 | 1663 | 100   | C_unshiu_00550 | 74091   | 75742   | 1652 | 0.92 | 99.1  |
| scaffold07067 | 1   | 1101 | 1101 | 66.13 | C_unshiu_01227 | 6511    | 7611    | 1101 | 1.33 | 99.82 |
| scaffold07068 | 1   | 1664 | 1664 | 100   | C_unshiu_00106 | 434278  | 432615  | 1664 | 0.37 | 99.22 |
| scaffold07070 | 621 | 1656 | 1036 | 62.56 | C_unshiu_00264 | 86996   | 85960   | 1037 | 0.36 | 99.13 |
| scaffold07073 | 1   | 1662 | 1662 | 100   | C_unshiu_01146 | 44323   | 45998   | 1676 | 1.84 | 98.93 |
| scaffold07078 | 1   | 1190 | 1190 | 71.69 | C_unshiu_00615 | 150624  | 149437  | 1188 | 0.72 | 99.33 |
| scaffold07082 | 1   | 1660 | 1660 | 100   | C_unshiu_00149 | 212672  | 211013  | 1660 | 0.43 | 100   |
| scaffold07083 | 1   | 1659 | 1659 | 100   | C_unshiu_00514 | 17799   | 16141   | 1659 | 0.89 | 99.94 |
| scaffold07085 | 1   | 1586 | 1586 | 95.6  | C_unshiu_01220 | 21300   | 22898   | 1599 | 1.91 | 98.75 |
| scaffold07086 | 1   | 1619 | 1619 | 97.59 | C_unshiu_00001 | 458488  | 460106  | 1619 | 0.06 | 99.75 |
| scaffold07093 | 1   | 1544 | 1544 | 93.18 | C_unshiu_00971 | 100795  | 99251   | 1545 | 1.41 | 99.55 |
| scaffold07097 | 1   | 1656 | 1656 | 100   | C_unshiu_02504 | 9221    | 7566    | 1656 | 6.75 | 99.88 |
| scaffold07100 | 1   | 1650 | 1650 | 100   | C_unshiu_00474 | 163322  | 164977  | 1656 | 0.82 | 99.46 |
| scaffold07101 | 1   | 1655 | 1655 | 100   | C_unshiu_00975 | 16389   | 14732   | 1658 | 1.52 | 99.46 |
| scaffold07103 | 1   | 1655 | 1655 | 100   | C_unshiu_00092 | 203078  | 204732  | 1655 | 0.35 | 99.4  |
| scaffold07104 | 1   | 1654 | 1654 | 100   | C_unshiu_01866 | 8531    | 6882    | 1650 | 3.6  | 98.49 |
| scaffold07105 | 1   | 1652 | 1652 | 99.88 | C_unshiu_02348 | 27474   | 25823   | 1652 | 5.82 | 100   |
| scaffold07107 | 1   | 1654 | 1654 | 100   | C_unshiu_01908 | 42921   | 41268   | 1654 | 3.73 | 100   |
| scaffold07108 | 1   | 1654 | 1654 | 100   | C_unshiu_01667 | 20058   | 18407   | 1652 | 3.04 | 98.2  |
| scaffold07114 | 67  | 1652 | 1586 | 96    | C_unshiu_01362 | 13577   | 11995   | 1583 | 2.16 | 98.8  |
| scaffold07115 | 271 | 1651 | 1381 | 83.65 | C_unshiu_00229 | 272847  | 274227  | 1381 | 0.45 | 98.99 |
| scaffold07121 | 1   | 1150 | 1150 | 69.7  | C_unshiu_00273 | 60787   | 61936   | 1150 | 0.41 | 99.48 |
| scaffold07122 | 34  | 1649 | 1616 | 98    | C_unshiu_01415 | 3921    | 2310    | 1612 | 2.31 | 98.76 |
| scaffold07125 | 1   | 1649 | 1649 | 100   | C_unshiu_00671 | 69110   | 67458   | 1653 | 1.09 | 99.52 |
| scaffold07128 | 1   | 1213 | 1213 | 74.19 | C_unshiu_00328 | 229110  | 230321  | 1212 | 0.48 | 99.75 |
| scaffold07129 | 1   | 1649 | 1649 | 100   | C_unshiu_00011 | 109739  | 111391  | 1653 | 0.17 | 99.76 |
| scaffold07130 | 1   | 1648 | 1648 | 100   | C_unshiu_01905 | 17844   | 16181   | 1664 | 3.75 | 98.44 |
| scaffold07132 | 1   | 1648 | 1648 | 100   | C_unshiu_00436 | 68337   | 66690   | 1648 | 0.77 | 99.09 |
| scaffold07134 | 1   | 1647 | 1647 | 100   | C_unshiu_00025 | 543792  | 545439  | 1648 | 0.22 | 99.82 |
| scaffold07143 | 1   | 1644 | 1644 | 100   | C_unshiu_02294 | 14041   | 12396   | 1646 | 5.48 | 99.7  |
| scaffold07146 | 1   | 1643 | 1643 | 100   | C_unshiu_02339 | 4894    | 6536    | 1643 | 5.74 | 100   |
| scaffold07150 | 1   | 1642 | 1642 | 100   | C_unshiu_00606 | 42533   | 40892   | 1642 | 0.99 | 99.82 |
| scaffold07156 | 1   | 1638 | 1638 | 100   | C_unshiu_02830 | 5630    | 7267    | 1638 | 9.55 | 100   |
| scaffold07163 | 523 | 1635 | 1113 | 68.07 | C_unshiu_01123 | 69794   | 70906   | 1113 | 1.19 | 99.37 |
| scaffold07168 | 479 | 1633 | 1155 | 70.73 | C_unshiu_00280 | 123519  | 124673  | 1155 | 0.42 | 99.48 |
| scaffold07169 | 338 | 1629 | 1292 | 79.31 | C_unshiu_00079 | 151670  | 150373  | 1298 | 0.26 | 98.69 |
| scaffold07170 | 1   | 1633 | 1633 | 100   | C_unshiu_00874 | 37285   | 38919   | 1635 | 1.36 | 98.17 |
| scaffold07171 | 1   | 1633 | 1633 | 100   | C_unshiu_00549 | 88926   | 90558   | 1633 | 0.91 | 99.39 |
| scaffold07176 | 1   | 1632 | 1632 | 100   | C_unshiu_00829 | 8703    | 10326   | 1624 | 1.3  | 99.33 |

|               |     |      |      |       |                |        |        |      |       |       |
|---------------|-----|------|------|-------|----------------|--------|--------|------|-------|-------|
| scaffold07180 | 1   | 1629 | 1629 | 100   | C_unshiu_00760 | 42338  | 43967  | 1630 | 1.21  | 99.75 |
| scaffold07181 | 1   | 1628 | 1628 | 100   | C_unshiu_01653 | 6869   | 8496   | 1628 | 2.96  | 99.45 |
| scaffold07182 | 1   | 1628 | 1628 | 100   | C_unshiu_00741 | 76759  | 75132  | 1628 | 1.19  | 99.14 |
| scaffold07184 | 1   | 1619 | 1619 | 100   | C_unshiu_01039 | 85810  | 84172  | 1639 | 1.61  | 98.66 |
| scaffold07188 | 1   | 1627 | 1627 | 100   | C_unshiu_01126 | 37678  | 36062  | 1617 | 1.73  | 98.28 |
| scaffold07189 | 1   | 1627 | 1627 | 100   | C_unshiu_02844 | 3308   | 4955   | 1648 | 9.84  | 98.73 |
| scaffold07191 | 1   | 1626 | 1626 | 100   | C_unshiu_00090 | 76349  | 74724  | 1626 | 0.35  | 100   |
| scaffold07195 | 1   | 1625 | 1625 | 100   | C_unshiu_00009 | 524461 | 526085 | 1625 | 0.15  | 99.75 |
| scaffold07196 | 1   | 1625 | 1625 | 100   | C_unshiu_00918 | 31260  | 29623  | 1638 | 1.42  | 99.15 |
| scaffold07197 | 1   | 1625 | 1625 | 100   | C_unshiu_00237 | 111933 | 110302 | 1632 | 0.54  | 99.14 |
| scaffold07198 | 1   | 1625 | 1625 | 100   | C_unshiu_00298 | 77847  | 79482  | 1636 | 0.61  | 98.59 |
| scaffold07201 | 2   | 1621 | 1620 | 99.94 | C_unshiu_00590 | 17068  | 15450  | 1619 | 0.95  | 98.22 |
| scaffold07208 | 1   | 1622 | 1622 | 100   | C_unshiu_00608 | 129848 | 128227 | 1622 | 0.98  | 99.26 |
| scaffold07212 | 1   | 1620 | 1620 | 100   | C_unshiu_01828 | 42733  | 44352  | 1620 | 3.41  | 99.38 |
| scaffold07214 | 1   | 1620 | 1620 | 100   | C_unshiu_01059 | 78150  | 76531  | 1620 | 1.63  | 100   |
| scaffold07215 | 1   | 1619 | 1619 | 100   | C_unshiu_02227 | 10179  | 11795  | 1617 | 5     | 99.63 |
| scaffold07216 | 1   | 1617 | 1617 | 100   | C_unshiu_00131 | 208484 | 210091 | 1608 | 0.39  | 99.01 |
| scaffold07219 | 1   | 1618 | 1618 | 100   | C_unshiu_00251 | 159082 | 160699 | 1618 | 0.55  | 100   |
| scaffold07231 | 77  | 1379 | 1303 | 80.78 | C_unshiu_00194 | 2353   | 1047   | 1307 | 0.38  | 98.39 |
| scaffold07233 | 1   | 1613 | 1613 | 100   | C_unshiu_02233 | 3891   | 2279   | 1613 | 5.02  | 99.94 |
| scaffold07245 | 1   | 1607 | 1607 | 100   | C_unshiu_01482 | 10659  | 12266  | 1608 | 2.51  | 98.94 |
| scaffold07247 | 204 | 1598 | 1395 | 86.92 | C_unshiu_00519 | 137334 | 135940 | 1395 | 0.75  | 100   |
| scaffold07248 | 1   | 1608 | 1608 | 100   | C_unshiu_00046 | 448653 | 450260 | 1608 | 0.25  | 99.94 |
| scaffold07250 | 1   | 1608 | 1608 | 100   | C_unshiu_00182 | 14510  | 16115  | 1606 | 0.45  | 99    |
| scaffold07253 | 1   | 1607 | 1607 | 100   | C_unshiu_03016 | 8711   | 7107   | 1605 | 12.84 | 98.51 |
| scaffold07254 | 602 | 1606 | 1005 | 62.58 | C_unshiu_00892 | 87516  | 86513  | 1004 | 0.85  | 99.11 |
| scaffold07257 | 1   | 1604 | 1604 | 100   | C_unshiu_01273 | 32625  | 31027  | 1599 | 2.01  | 98.44 |
| scaffold07259 | 1   | 1568 | 1568 | 100   | C_unshiu_00475 | 4085   | 2519   | 1567 | 0.78  | 99.3  |
| scaffold07262 | 1   | 1603 | 1603 | 100   | C_unshiu_01214 | 71241  | 69639  | 1603 | 1.91  | 99.13 |
| scaffold07263 | 1   | 1603 | 1603 | 100   | C_unshiu_00764 | 48227  | 49827  | 1601 | 1.19  | 99.44 |
| scaffold07270 | 1   | 1599 | 1599 | 100   | C_unshiu_00197 | 290184 | 288588 | 1597 | 0.47  | 99.56 |
| scaffold07271 | 1   | 1391 | 1391 | 86.99 | C_unshiu_00191 | 235604 | 234214 | 1391 | 0.4   | 100   |
| scaffold07278 | 1   | 1595 | 1595 | 100   | C_unshiu_00897 | 8991   | 7401   | 1591 | 1.36  | 99.62 |
| scaffold07280 | 1   | 1595 | 1595 | 100   | C_unshiu_00151 | 286174 | 287768 | 1595 | 0.41  | 100   |
| scaffold07281 | 1   | 1596 | 1596 | 100   | C_unshiu_00784 | 107671 | 109266 | 1596 | 1.22  | 100   |
| scaffold07283 | 1   | 1593 | 1593 | 100   | C_unshiu_02601 | 4596   | 6182   | 1587 | 7.2   | 99    |
| scaffold07284 | 1   | 1593 | 1593 | 100   | C_unshiu_00402 | 32978  | 31386  | 1593 | 0.72  | 100   |
| scaffold07287 | 512 | 1591 | 1080 | 67.88 | C_unshiu_00653 | 13864  | 12785  | 1080 | 0.7   | 100   |
| scaffold07294 | 40  | 1590 | 1551 | 97.55 | C_unshiu_01512 | 51646  | 50093  | 1554 | 2.49  | 98.84 |
| scaffold07295 | 134 | 1590 | 1457 | 91.64 | C_unshiu_00080 | 46342  | 47798  | 1457 | 0.3   | 99.86 |
| scaffold07297 | 1   | 1128 | 1128 | 70.99 | C_unshiu_01625 | 12307  | 11180  | 1128 | 2.01  | 99.65 |
| scaffold07299 | 251 | 1588 | 1338 | 84.26 | C_unshiu_00170 | 310754 | 309417 | 1338 | 0.36  | 100   |
| scaffold07301 | 1   | 1588 | 1588 | 100   | C_unshiu_00613 | 129781 | 128194 | 1588 | 0.96  | 100   |
| scaffold07304 | 1   | 1257 | 1257 | 79.26 | C_unshiu_00208 | 174025 | 175282 | 1258 | 0.38  | 98.74 |
| scaffold07305 | 1   | 1268 | 1268 | 79.9  | C_unshiu_01322 | 58229  | 59496  | 1268 | 1.68  | 98.97 |
| scaffold07306 | 1   | 1587 | 1587 | 100   | C_unshiu_00101 | 107378 | 108980 | 1603 | 0.35  | 98.88 |
| scaffold07310 | 1   | 1585 | 1585 | 100   | C_unshiu_01011 | 77577  | 75998  | 1580 | 1.51  | 98.93 |
| scaffold07311 | 1   | 1585 | 1585 | 100   | C_unshiu_00241 | 288193 | 289778 | 1586 | 0.53  | 99.37 |
| scaffold07313 | 1   | 1130 | 1130 | 71.34 | C_unshiu_01098 | 48124  | 46995  | 1130 | 1.18  | 100   |
| scaffold07314 | 1   | 1584 | 1584 | 100   | C_unshiu_00417 | 19454  | 21037  | 1584 | 0.72  | 100   |
| scaffold07315 | 1   | 1583 | 1583 | 100   | C_unshiu_00083 | 209042 | 207460 | 1583 | 0.33  | 99.87 |
| scaffold07318 | 1   | 1582 | 1582 | 100   | C_unshiu_00774 | 75762  | 77352  | 1591 | 1.2   | 98.81 |
| scaffold07324 | 361 | 1572 | 1212 | 77    | C_unshiu_00760 | 94878  | 93666  | 1213 | 0.9   | 99.67 |
| scaffold07330 | 1   | 1333 | 1333 | 84.42 | C_unshiu_00453 | 202479 | 201148 | 1332 | 0.64  | 98.05 |
| scaffold07332 | 1   | 1093 | 1093 | 69.26 | C_unshiu_00739 | 53217  | 54312  | 1096 | 0.8   | 99.45 |
| scaffold07333 | 1   | 1578 | 1578 | 100   | C_unshiu_00313 | 71925  | 70348  | 1578 | 0.61  | 100   |
| scaffold07337 | 1   | 1577 | 1577 | 100   | C_unshiu_00675 | 19951  | 21528  | 1578 | 1.05  | 99.87 |
| scaffold07342 | 26  | 1576 | 1551 | 98.41 | C_unshiu_00415 | 67901  | 66354  | 1548 | 0.7   | 98.65 |
| scaffold07345 | 1   | 1575 | 1575 | 100   | C_unshiu_02985 | 7065   | 8639   | 1575 | 11.82 | 98.99 |
| scaffold07346 | 1   | 1575 | 1575 | 100   | C_unshiu_00718 | 113232 | 114809 | 1578 | 1.12  | 99.56 |
| scaffold07348 | 1   | 1574 | 1574 | 100   | C_unshiu_00355 | 106434 | 104861 | 1574 | 0.66  | 99.81 |
| scaffold07353 | 152 | 1572 | 1421 | 90.39 | C_unshiu_00116 | 388798 | 390225 | 1428 | 0.33  | 98.39 |
| scaffold07354 | 1   | 1573 | 1573 | 100   | C_unshiu_00065 | 529764 | 528192 | 1573 | 0.28  | 100   |
| scaffold07359 | 251 | 1570 | 1320 | 84.08 | C_unshiu_00226 | 80251  | 78941  | 1311 | 0.42  | 98.41 |
| scaffold07360 | 1   | 1570 | 1570 | 100   | C_unshiu_00001 | 222265 | 220687 | 1579 | 0.06  | 99.24 |
| scaffold07361 | 1   | 1379 | 1379 | 87.89 | C_unshiu_00512 | 96921  | 95544  | 1378 | 0.73  | 99.49 |
| scaffold07366 | 1   | 1568 | 1568 | 100   | C_unshiu_02613 | 11017  | 12584  | 1568 | 7.19  | 99.74 |
| scaffold07369 | 1   | 1567 | 1567 | 100   | C_unshiu_01274 | 74178  | 75744  | 1567 | 1.98  | 99.62 |
| scaffold07370 | 1   | 1566 | 1566 | 100   | C_unshiu_00910 | 113317 | 111752 | 1566 | 1.35  | 100   |
| scaffold07372 | 1   | 1565 | 1565 | 100   | C_unshiu_01964 | 1921   | 3496   | 1576 | 3.75  | 99.24 |
| scaffold07373 | 1   | 1565 | 1565 | 100   | C_unshiu_01125 | 8589   | 10151  | 1563 | 1.67  | 99.87 |
| scaffold07374 | 1   | 1568 | 1568 | 100   | C_unshiu_00008 | 122763 | 121179 | 1585 | 0.15  | 98.05 |
| scaffold07375 | 14  | 1564 | 1551 | 99.17 | C_unshiu_00476 | 65048  | 66579  | 1532 | 0.77  | 98.2  |
| scaffold07376 | 1   | 1563 | 1563 | 100   | C_unshiu_00999 | 82701  | 81140  | 1562 | 1.47  | 98.46 |
| scaffold07377 | 4   | 1563 | 1560 | 99.81 | C_unshiu_00945 | 68175  | 66616  | 1560 | 1.39  | 98.4  |
| scaffold07382 | 35  | 1455 | 1421 | 90.97 | C_unshiu_00106 | 97250  | 98652  | 1403 | 0.31  | 98.1  |
| scaffold07384 | 1   | 1561 | 1561 | 100   | C_unshiu_00418 | 216121 | 214562 | 1560 | 0.71  | 99.87 |
| scaffold07385 | 346 | 1560 | 1215 | 77.88 | C_unshiu_00711 | 63027  | 64246  | 1220 | 0.86  | 98.12 |
| scaffold07388 | 1   | 1103 | 1103 | 70.75 | C_unshiu_02646 | 737    | 1840   | 1104 | 5.24  | 99.91 |

|               |     |      |      |       |                |        |        |      |       |       |
|---------------|-----|------|------|-------|----------------|--------|--------|------|-------|-------|
| scaffold07390 | 1   | 1558 | 1558 | 100   | C_unshiu_00660 | 96591  | 98147  | 1557 | 1.01  | 99.04 |
| scaffold07395 | 1   | 1556 | 1556 | 100   | C_unshiu_00475 | 184484 | 186039 | 1556 | 0.78  | 100   |
| scaffold07401 | 1   | 1555 | 1555 | 100   | C_unshiu_00298 | 100346 | 98794  | 1553 | 0.58  | 99.87 |
| scaffold07404 | 1   | 1553 | 1553 | 100   | C_unshiu_00054 | 367861 | 369406 | 1546 | 0.26  | 99.03 |
| scaffold07405 | 1   | 1172 | 1172 | 75.47 | C_unshiu_01274 | 25881  | 27052  | 1172 | 1.48  | 100   |
| scaffold07408 | 20  | 1552 | 1533 | 98.78 | C_unshiu_00070 | 164792 | 166323 | 1532 | 0.29  | 99.28 |
| scaffold07413 | 1   | 1551 | 1551 | 100   | C_unshiu_01878 | 16234  | 17784  | 1551 | 3.42  | 100   |
| scaffold07415 | 1   | 1550 | 1550 | 100   | C_unshiu_00101 | 186499 | 184949 | 1551 | 0.34  | 99.68 |
| scaffold07417 | 1   | 1235 | 1235 | 79.68 | C_unshiu_00144 | 141901 | 143135 | 1235 | 0.31  | 99.19 |
| scaffold07419 | 1   | 1550 | 1550 | 100   | C_unshiu_01006 | 18058  | 16494  | 1565 | 1.49  | 98.53 |
| scaffold07420 | 1   | 1550 | 1550 | 100   | C_unshiu_00402 | 172762 | 174311 | 1550 | 0.7   | 99.1  |
| scaffold07421 | 1   | 1550 | 1550 | 100   | C_unshiu_02120 | 19641  | 18098  | 1544 | 4.31  | 98.84 |
| scaffold07431 | 1   | 1546 | 1546 | 100   | C_unshiu_00463 | 126472 | 124927 | 1546 | 0.76  | 99.81 |
| scaffold07432 | 1   | 1546 | 1546 | 100   | C_unshiu_00399 | 200893 | 199353 | 1541 | 0.69  | 98.19 |
| scaffold07433 | 1   | 1545 | 1545 | 100   | C_unshiu_00095 | 155411 | 156956 | 1546 | 0.33  | 99.87 |
| scaffold07436 | 1   | 1545 | 1545 | 100   | C_unshiu_00009 | 121056 | 122605 | 1550 | 0.15  | 99.29 |
| scaffold07437 | 1   | 1545 | 1545 | 100   | C_unshiu_01242 | 26564  | 28112  | 1549 | 1.9   | 99.68 |
| scaffold07441 | 1   | 1544 | 1544 | 100   | C_unshiu_00016 | 311029 | 309486 | 1544 | 0.18  | 99.68 |
| scaffold07448 | 140 | 1540 | 1401 | 90.97 | C_unshiu_00175 | 265473 | 264073 | 1401 | 0.39  | 100   |
| scaffold07453 | 236 | 1238 | 1003 | 65.13 | C_unshiu_00777 | 47098  | 46097  | 1002 | 0.76  | 98.51 |
| scaffold07455 | 1   | 1538 | 1538 | 100   | C_unshiu_01376 | 65430  | 63893  | 1538 | 2.14  | 99.15 |
| scaffold07457 | 281 | 1538 | 1258 | 81.79 | C_unshiu_00144 | 70345  | 69081  | 1265 | 1.38  | 98.66 |
| scaffold07458 | 1   | 1411 | 1411 | 92.77 | C_unshiu_00096 | 128419 | 129832 | 1414 | 0.31  | 99.43 |
| scaffold07462 | 1   | 1538 | 1538 | 100   | C_unshiu_01946 | 5306   | 3771   | 1536 | 3.58  | 98.51 |
| scaffold07466 | 1   | 1534 | 1534 | 100   | C_unshiu_00032 | 93304  | 94837  | 1534 | 0.22  | 100   |
| scaffold07467 | 1   | 1534 | 1534 | 100   | C_unshiu_00238 | 161647 | 160114 | 1534 | 0.51  | 100   |
| scaffold07470 | 1   | 1532 | 1532 | 100   | C_unshiu_00026 | 629619 | 631157 | 1539 | 0.2   | 99.35 |
| scaffold07471 | 1   | 1527 | 1527 | 99.54 | C_unshiu_01254 | 16050  | 14522  | 1529 | 1.9   | 99.48 |
| scaffold07472 | 1   | 1200 | 1200 | 78.28 | C_unshiu_01004 | 33070  | 31873  | 1198 | 1.14  | 98.92 |
| scaffold07476 | 1   | 1532 | 1532 | 100   | C_unshiu_02592 | 2712   | 1181   | 1532 | 6.86  | 100   |
| scaffold07477 | 1   | 1532 | 1532 | 100   | C_unshiu_02539 | 5939   | 7470   | 1532 | 6.5   | 100   |
| scaffold07479 | 1   | 1531 | 1531 | 100   | C_unshiu_00344 | 193246 | 194776 | 1531 | 0.62  | 99.87 |
| scaffold07482 | 1   | 1530 | 1530 | 100   | C_unshiu_00126 | 309394 | 310923 | 1530 | 0.37  | 100   |
| scaffold07485 | 1   | 1529 | 1529 | 100   | C_unshiu_00534 | 79730  | 81257  | 1528 | 0.84  | 99.87 |
| scaffold07489 | 1   | 1527 | 1527 | 100   | C_unshiu_01929 | 26807  | 28334  | 1528 | 3.49  | 99.08 |
| scaffold07490 | 5   | 1039 | 1035 | 67.65 | C_unshiu_00424 | 111008 | 109973 | 1036 | 0.48  | 98.55 |
| scaffold07498 | 427 | 1521 | 1095 | 71.99 | C_unshiu_01502 | 46259  | 45166  | 1094 | 1.73  | 99.82 |
| scaffold07501 | 1   | 1524 | 1524 | 100   | C_unshiu_00773 | 21050  | 19527  | 1524 | 1.15  | 100   |
| scaffold07507 | 1   | 1483 | 1483 | 97.44 | C_unshiu_00252 | 87743  | 86260  | 1484 | 0.5   | 99.66 |
| scaffold07513 | 1   | 1521 | 1521 | 100   | C_unshiu_00028 | 203777 | 205286 | 1510 | 0.21  | 98.88 |
| scaffold07514 | 1   | 1522 | 1522 | 100   | C_unshiu_00549 | 67657  | 66134  | 1524 | 0.85  | 98.95 |
| scaffold07517 | 1   | 1518 | 1518 | 100   | C_unshiu_01885 | 11546  | 13066  | 1521 | 3.37  | 98.55 |
| scaffold07518 | 428 | 1519 | 1092 | 71.89 | C_unshiu_00166 | 204868 | 203774 | 1095 | 0.3   | 99.18 |
| scaffold07519 | 1   | 1519 | 1519 | 100   | C_unshiu_02625 | 9660   | 11178  | 1519 | 7.05  | 100   |
| scaffold07524 | 1   | 1337 | 1337 | 88.54 | C_unshiu_00607 | 145739 | 144395 | 1345 | 0.81  | 98.07 |
| scaffold07525 | 443 | 1513 | 1071 | 70.79 | C_unshiu_00150 | 292130 | 291054 | 1077 | 0.28  | 99.07 |
| scaffold07527 | 400 | 1514 | 1115 | 73.65 | C_unshiu_00875 | 48058  | 49172  | 1115 | 0.93  | 99.28 |
| scaffold07529 | 1   | 1100 | 1100 | 72.56 | C_unshiu_02196 | 19309  | 20408  | 1100 | 3.3   | 99.45 |
| scaffold07534 | 22  | 1512 | 1491 | 98.61 | C_unshiu_02571 | 16624  | 15133  | 1492 | 6.56  | 98.86 |
| scaffold07535 | 5   | 1513 | 1509 | 99.74 | C_unshiu_00427 | 205362 | 203872 | 1491 | 0.69  | 98.81 |
| scaffold07541 | 1   | 1512 | 1512 | 100   | C_unshiu_01598 | 23504  | 21993  | 1512 | 2.63  | 99.54 |
| scaffold07543 | 1   | 1512 | 1512 | 100   | C_unshiu_00055 | 570405 | 568892 | 1514 | 0.25  | 99.6  |
| scaffold07546 | 1   | 1511 | 1511 | 100   | C_unshiu_00680 | 84364  | 82854  | 1511 | 1.02  | 100   |
| scaffold07547 | 1   | 1510 | 1510 | 100   | C_unshiu_01472 | 40146  | 38637  | 1510 | 2.32  | 100   |
| scaffold07549 | 1   | 1511 | 1511 | 100   | C_unshiu_00286 | 109647 | 111155 | 1509 | 0.55  | 99.54 |
| scaffold07551 | 1   | 1511 | 1511 | 100   | C_unshiu_02301 | 11094  | 9584   | 1511 | 5.06  | 100   |
| scaffold07552 | 1   | 1511 | 1511 | 100   | C_unshiu_01240 | 45789  | 47299  | 1511 | 1.85  | 100   |
| scaffold07553 | 1   | 1511 | 1511 | 100   | C_unshiu_01867 | 38471  | 39981  | 1511 | 3.3   | 100   |
| scaffold07557 | 1   | 1510 | 1510 | 100   | C_unshiu_00123 | 287016 | 285507 | 1510 | 0.36  | 100   |
| scaffold07558 | 1   | 1510 | 1510 | 100   | C_unshiu_00542 | 22404  | 20878  | 1527 | 0.85  | 98.82 |
| scaffold07559 | 1   | 1510 | 1510 | 100   | C_unshiu_00221 | 237568 | 239078 | 1511 | 0.48  | 99.14 |
| scaffold07560 | 1   | 1510 | 1510 | 100   | C_unshiu_00774 | 92955  | 94471  | 1517 | 1.15  | 98.02 |
| scaffold07569 | 1   | 1246 | 1246 | 82.68 | C_unshiu_00062 | 467776 | 466532 | 1245 | 0.22  | 98.88 |
| scaffold07573 | 1   | 1506 | 1506 | 100   | C_unshiu_02968 | 1313   | 2820   | 1508 | 10.91 | 99.27 |
| scaffold07574 | 1   | 1300 | 1300 | 86.32 | C_unshiu_00845 | 25272  | 23973  | 1300 | 1.06  | 100   |
| scaffold07575 | 1   | 1505 | 1505 | 100   | C_unshiu_00472 | 54033  | 52529  | 1505 | 0.75  | 99.87 |
| scaffold07577 | 1   | 1187 | 1187 | 78.87 | C_unshiu_00107 | 263772 | 264958 | 1187 | 0.27  | 99.41 |
| scaffold07579 | 2   | 1504 | 1503 | 99.93 | C_unshiu_01151 | 26081  | 24579  | 1503 | 1.66  | 100   |
| scaffold07582 | 1   | 1504 | 1504 | 100   | C_unshiu_00134 | 359825 | 361328 | 1504 | 0.37  | 99.8  |
| scaffold07584 | 109 | 1502 | 1394 | 92.81 | C_unshiu_03033 | 1816   | 424    | 1393 | 11.61 | 99.21 |
| scaffold07585 | 1   | 1498 | 1498 | 100   | C_unshiu_00426 | 27507  | 26012  | 1496 | 0.69  | 98.34 |
| scaffold07587 | 1   | 1504 | 1504 | 100   | C_unshiu_00948 | 52761  | 51256  | 1506 | 1.35  | 99    |
| scaffold07592 | 1   | 1499 | 1499 | 100   | C_unshiu_00265 | 212051 | 210553 | 1499 | 0.53  | 100   |
| scaffold07594 | 1   | 1498 | 1498 | 100   | C_unshiu_01082 | 52529  | 54026  | 1498 | 1.53  | 100   |
| scaffold07595 | 1   | 1498 | 1498 | 100   | C_unshiu_00559 | 88561  | 90058  | 1498 | 0.85  | 100   |
| scaffold07597 | 1   | 1497 | 1497 | 100   | C_unshiu_00852 | 121034 | 119541 | 1494 | 1.22  | 99.53 |
| scaffold07599 | 1   | 1497 | 1497 | 100   | C_unshiu_01130 | 15864  | 17363  | 1500 | 1.62  | 98.74 |
| scaffold07601 | 449 | 1497 | 1049 | 70.07 | C_unshiu_01175 | 12980  | 11930  | 1051 | 1.2   | 98.67 |
| scaffold07602 | 1   | 1296 | 1296 | 86.57 | C_unshiu_00514 | 175768 | 177063 | 1296 | 0.69  | 100   |

|               |     |      |      |       |                |        |        |      |       |       |
|---------------|-----|------|------|-------|----------------|--------|--------|------|-------|-------|
| scaffold07603 | 1   | 1496 | 1496 | 100   | C_unshiu_00361 | 177469 | 175974 | 1496 | 0.63  | 98.46 |
| scaffold07608 | 1   | 1496 | 1496 | 100   | C_unshiu_00028 | 131957 | 130462 | 1496 | 0.21  | 100   |
| scaffold07611 | 1   | 1495 | 1495 | 100   | C_unshiu_00115 | 114204 | 112705 | 1500 | 0.35  | 98.87 |
| scaffold07612 | 1   | 1463 | 1463 | 97.93 | C_unshiu_00160 | 35011  | 36485  | 1475 | 0.4   | 98.37 |
| scaffold07615 | 1   | 1488 | 1488 | 100   | C_unshiu_01489 | 40520  | 39027  | 1494 | 2.34  | 99.13 |
| scaffold07616 | 1   | 1468 | 1468 | 98.33 | C_unshiu_00568 | 87635  | 86168  | 1468 | 0.84  | 100   |
| scaffold07617 | 1   | 1493 | 1493 | 100   | C_unshiu_02382 | 13401  | 14893  | 1493 | 5.4   | 99.93 |
| scaffold07618 | 1   | 1493 | 1493 | 100   | C_unshiu_00249 | 58231  | 56735  | 1497 | 0.51  | 99.4  |
| scaffold07619 | 1   | 1042 | 1042 | 69.84 | C_unshiu_01252 | 35709  | 36753  | 1045 | 1.29  | 98.19 |
| scaffold07626 | 1   | 1490 | 1490 | 100   | C_unshiu_00086 | 427499 | 428988 | 1490 | 0.32  | 100   |
| scaffold07633 | 1   | 1486 | 1486 | 100   | C_unshiu_00001 | 553099 | 554585 | 1487 | 0.06  | 98.93 |
| scaffold07637 | 1   | 1485 | 1485 | 100   | C_unshiu_00048 | 3405   | 1920   | 1486 | 0.24  | 99.93 |
| scaffold07640 | 125 | 1484 | 1360 | 91.64 | C_unshiu_00030 | 556505 | 557870 | 1366 | 0.19  | 99.12 |
| scaffold07642 | 1   | 1484 | 1484 | 100   | C_unshiu_00467 | 127455 | 125971 | 1485 | 0.73  | 99.87 |
| scaffold07643 | 1   | 1483 | 1483 | 100   | C_unshiu_02373 | 11344  | 12826  | 1483 | 5.33  | 99.73 |
| scaffold07650 | 1   | 1481 | 1481 | 100   | C_unshiu_00257 | 50356  | 51844  | 1489 | 0.51  | 99.26 |
| scaffold07651 | 1   | 1481 | 1481 | 100   | C_unshiu_00900 | 49899  | 51379  | 1481 | 1.27  | 100   |
| scaffold07653 | 1   | 1479 | 1479 | 100   | C_unshiu_00303 | 5426   | 6905   | 1480 | 0.56  | 98.18 |
| scaffold07656 | 1   | 1481 | 1481 | 100   | C_unshiu_00106 | 120903 | 122384 | 1482 | 0.33  | 99.93 |
| scaffold07662 | 49  | 1478 | 1430 | 96.75 | C_unshiu_01745 | 32272  | 33702  | 1431 | 2.82  | 99.44 |
| scaffold07666 | 1   | 1478 | 1478 | 100   | C_unshiu_00211 | 229512 | 231002 | 1491 | 0.46  | 99.13 |
| scaffold07667 | 1   | 1150 | 1150 | 77.86 | C_unshiu_00041 | 127725 | 126586 | 1140 | 0.17  | 98.61 |
| scaffold07670 | 1   | 1479 | 1479 | 100   | C_unshiu_00856 | 8962   | 10432  | 1471 | 1.2   | 98.38 |
| scaffold07674 | 1   | 1394 | 1394 | 94.57 | C_unshiu_00001 | 504234 | 505632 | 1399 | 0.05  | 99.64 |
| scaffold07675 | 1   | 1447 | 1447 | 97.97 | C_unshiu_00864 | 43807  | 42377  | 1431 | 1.18  | 98.21 |
| scaffold07687 | 1   | 1470 | 1470 | 100   | C_unshiu_00865 | 61548  | 60072  | 1477 | 1.22  | 99.26 |
| scaffold07688 | 78  | 1470 | 1393 | 94.76 | C_unshiu_03129 | 703    | 2101   | 1399 | 19.34 | 99    |
| scaffold07690 | 1   | 1469 | 1469 | 100   | C_unshiu_00942 | 13809  | 15277  | 1469 | 1.31  | 99.32 |
| scaffold07693 | 1   | 1468 | 1468 | 100   | C_unshiu_01111 | 77575  | 79042  | 1468 | 1.55  | 99.93 |
| scaffold07697 | 1   | 1467 | 1467 | 100   | C_unshiu_01687 | 44747  | 43281  | 1467 | 2.76  | 100   |
| scaffold07698 | 1   | 1086 | 1086 | 73.98 | C_unshiu_00286 | 224853 | 225936 | 1084 | 0.4   | 98.17 |
| scaffold07700 | 1   | 1466 | 1466 | 100   | C_unshiu_02618 | 21463  | 19997  | 1467 | 6.76  | 99.93 |
| scaffold07701 | 3   | 1465 | 1463 | 99.86 | C_unshiu_00046 | 25328  | 23874  | 1455 | 0.23  | 98.77 |
| scaffold07702 | 1   | 1465 | 1465 | 100   | C_unshiu_00839 | 6283   | 7751   | 1469 | 1.19  | 99.46 |
| scaffold07704 | 1   | 1465 | 1465 | 100   | C_unshiu_00043 | 38283  | 39749  | 1467 | 0.23  | 99.52 |
| scaffold07706 | 1   | 1464 | 1464 | 100   | C_unshiu_00040 | 416590 | 415127 | 1464 | 0.22  | 100   |
| scaffold07713 | 1   | 1463 | 1463 | 100   | C_unshiu_00157 | 42106  | 43549  | 1444 | 0.38  | 98.7  |
| scaffold07714 | 1   | 1462 | 1462 | 100   | C_unshiu_00794 | 20560  | 22030  | 1471 | 1.14  | 98.3  |
| scaffold07719 | 1   | 1461 | 1461 | 100   | C_unshiu_00585 | 130809 | 132269 | 1461 | 0.86  | 100   |
| scaffold07722 | 1   | 1182 | 1182 | 81.01 | C_unshiu_00227 | 118617 | 119807 | 1191 | 0.38  | 99.24 |
| scaffold07727 | 52  | 1456 | 1405 | 96.5  | C_unshiu_00223 | 208035 | 209439 | 1405 | 0.45  | 99.64 |
| scaffold07729 | 1   | 1457 | 1457 | 100   | C_unshiu_00679 | 36022  | 34566  | 1457 | 0.98  | 100   |
| scaffold07733 | 1   | 1456 | 1456 | 100   | C_unshiu_00331 | 44728  | 46183  | 1456 | 0.58  | 99.79 |
| scaffold07737 | 1   | 1008 | 1008 | 68.76 | C_unshiu_00694 | 5075   | 4067   | 1009 | 0.7   | 98.22 |
| scaffold07739 | 1   | 1455 | 1455 | 100   | C_unshiu_01766 | 33678  | 35132  | 1455 | 2.92  | 99.73 |
| scaffold07745 | 1   | 1453 | 1453 | 100   | C_unshiu_00126 | 147232 | 148693 | 1462 | 0.35  | 98.77 |
| scaffold07749 | 1   | 1452 | 1452 | 100   | C_unshiu_00638 | 94524  | 93073  | 1452 | 0.91  | 99.93 |
| scaffold07750 | 147 | 1452 | 1306 | 89.94 | C_unshiu_00011 | 313738 | 315054 | 1317 | 0.14  | 98.03 |
| scaffold07752 | 1   | 1451 | 1451 | 100   | C_unshiu_00712 | 109566 | 108114 | 1453 | 1.02  | 99.59 |
| scaffold07755 | 1   | 1451 | 1451 | 100   | C_unshiu_00358 | 63415  | 64865  | 1451 | 0.61  | 100   |
| scaffold07757 | 1   | 1451 | 1451 | 100   | C_unshiu_02575 | 13276  | 11829  | 1448 | 6.39  | 99.52 |
| scaffold07765 | 1   | 1449 | 1449 | 100   | C_unshiu_00039 | 133597 | 132149 | 1449 | 0.22  | 100   |
| scaffold07770 | 1   | 1448 | 1448 | 100   | C_unshiu_00326 | 89380  | 90831  | 1452 | 0.57  | 99.66 |
| scaffold07771 | 1   | 1435 | 1435 | 100   | C_unshiu_02601 | 6481   | 7921   | 1441 | 6.53  | 99.1  |
| scaffold07773 | 1   | 1447 | 1447 | 100   | C_unshiu_00319 | 226180 | 227627 | 1448 | 0.56  | 99.65 |
| scaffold07775 | 1   | 1447 | 1447 | 100   | C_unshiu_01038 | 4017   | 2571   | 1447 | 1.41  | 100   |
| scaffold07789 | 1   | 1443 | 1443 | 100   | C_unshiu_00211 | 127738 | 126290 | 1449 | 0.44  | 98.41 |
| scaffold07791 | 1   | 1443 | 1443 | 100   | C_unshiu_00740 | 58677  | 57236  | 1442 | 1.05  | 99.45 |
| scaffold07793 | 1   | 1443 | 1443 | 100   | C_unshiu_00064 | 480212 | 481654 | 1443 | 0.26  | 99.45 |
| scaffold07799 | 1   | 1441 | 1441 | 100   | C_unshiu_00088 | 96390  | 97833  | 1444 | 0.31  | 99.79 |
| scaffold07800 | 1   | 1345 | 1345 | 93.4  | C_unshiu_00096 | 449905 | 451246 | 1342 | 0.29  | 99.55 |
| scaffold07806 | 1   | 1439 | 1439 | 100   | C_unshiu_00484 | 92631  | 94069  | 1439 | 0.73  | 99.65 |
| scaffold07810 | 1   | 1316 | 1316 | 91.45 | C_unshiu_00137 | 102198 | 100884 | 1315 | 0.33  | 99.01 |
| scaffold07811 | 1   | 1438 | 1438 | 100   | C_unshiu_00269 | 142720 | 144157 | 1438 | 0.51  | 100   |
| scaffold07812 | 6   | 1437 | 1432 | 99.65 | C_unshiu_00045 | 220892 | 222320 | 1429 | 0.22  | 99.51 |
| scaffold07814 | 336 | 1436 | 1101 | 76.67 | C_unshiu_02987 | 11915  | 10815  | 1101 | 8.32  | 100   |
| scaffold07818 | 1   | 1433 | 1433 | 100   | C_unshiu_00020 | 590514 | 591942 | 1429 | 0.18  | 98.82 |
| scaffold07819 | 1   | 1435 | 1435 | 100   | C_unshiu_01984 | 20673  | 22112  | 1440 | 3.5   | 99.03 |
| scaffold07821 | 1   | 1434 | 1434 | 100   | C_unshiu_00057 | 18455  | 17021  | 1435 | 0.24  | 99.86 |
| scaffold07828 | 1   | 1431 | 1431 | 100   | C_unshiu_01420 | 62062  | 63492  | 1431 | 2.06  | 99.72 |
| scaffold07829 | 1   | 1431 | 1431 | 100   | C_unshiu_00792 | 101109 | 102539 | 1431 | 1.11  | 100   |
| scaffold07831 | 1   | 1431 | 1431 | 100   | C_unshiu_01047 | 7003   | 5572   | 1432 | 1.42  | 99.79 |
| scaffold07835 | 1   | 1430 | 1430 | 100   | C_unshiu_00003 | 160445 | 161876 | 1432 | 0.11  | 99.3  |
| scaffold07836 | 1   | 1121 | 1121 | 78.39 | C_unshiu_00330 | 89083  | 90201  | 1119 | 0.44  | 99.46 |
| scaffold07840 | 119 | 1424 | 1306 | 91.71 | C_unshiu_00891 | 72818  | 74120  | 1303 | 1.1   | 99.23 |
| scaffold07841 | 1   | 1428 | 1428 | 100   | C_unshiu_00001 | 234785 | 236207 | 1423 | 0.05  | 99.23 |
| scaffold07843 | 1   | 1426 | 1426 | 100   | C_unshiu_00934 | 106979 | 105552 | 1428 | 1.26  | 99.02 |
| scaffold07846 | 1   | 1425 | 1425 | 100   | C_unshiu_01166 | 37467  | 38893  | 1427 | 1.6   | 99.51 |
| scaffold07855 | 1   | 1424 | 1424 | 100   | C_unshiu_00381 | 6707   | 8130   | 1424 | 0.62  | 98.95 |

|               |     |      |      |       |                |        |        |      |      |       |
|---------------|-----|------|------|-------|----------------|--------|--------|------|------|-------|
| scaffold07857 | 1   | 1424 | 1424 | 100   | C_unshiu_01927 | 24536  | 25959  | 1424 | 3.25 | 100   |
| scaffold07858 | 1   | 1416 | 1416 | 100   | C_unshiu_00008 | 969350 | 970776 | 1427 | 0.13 | 98.6  |
| scaffold07860 | 1   | 1423 | 1423 | 100   | C_unshiu_00074 | 6159   | 4738   | 1422 | 0.28 | 99.44 |
| scaffold07862 | 1   | 1423 | 1423 | 100   | C_unshiu_00304 | 195130 | 193708 | 1423 | 0.54 | 100   |
| scaffold07865 | 1   | 1422 | 1422 | 100   | C_unshiu_00390 | 9061   | 7644   | 1418 | 0.63 | 99.51 |
| scaffold07866 | 1   | 1421 | 1421 | 100   | C_unshiu_00305 | 178188 | 176769 | 1420 | 0.54 | 99.02 |
| scaffold07867 | 1   | 1421 | 1421 | 100   | C_unshiu_00978 | 87849  | 89269  | 1421 | 1.31 | 99.65 |
| scaffold07873 | 1   | 1420 | 1420 | 100   | C_unshiu_00062 | 546716 | 548147 | 1432 | 0.25 | 98.6  |
| scaffold07876 | 1   | 1418 | 1418 | 100   | C_unshiu_00362 | 52596  | 54018  | 1423 | 0.6  | 98.52 |
| scaffold07881 | 1   | 1419 | 1419 | 100   | C_unshiu_00608 | 122390 | 123819 | 1430 | 0.87 | 98.33 |
| scaffold07882 | 1   | 1419 | 1419 | 100   | C_unshiu_00430 | 25411  | 23994  | 1418 | 0.66 | 99.93 |
| scaffold07883 | 122 | 1314 | 1193 | 84.31 | C_unshiu_01110 | 17259  | 18451  | 1193 | 1.26 | 100   |
| scaffold07886 | 1   | 1418 | 1418 | 100   | C_unshiu_00353 | 236269 | 234852 | 1418 | 0.59 | 100   |
| scaffold07888 | 85  | 1409 | 1325 | 94.04 | C_unshiu_00370 | 32054  | 33387  | 1334 | 0.57 | 98.43 |
| scaffold07889 | 1   | 1417 | 1417 | 100   | C_unshiu_00240 | 291851 | 290435 | 1417 | 0.47 | 100   |
| scaffold07890 | 1   | 1417 | 1417 | 100   | C_unshiu_01489 | 37307  | 38723  | 1417 | 2.22 | 98.8  |
| scaffold07891 | 1   | 1417 | 1417 | 100   | C_unshiu_00188 | 95064  | 93648  | 1417 | 0.41 | 100   |
| scaffold07903 | 1   | 1415 | 1415 | 100   | C_unshiu_00487 | 189033 | 190447 | 1415 | 0.72 | 100   |
| scaffold07908 | 1   | 1412 | 1412 | 100   | C_unshiu_00449 | 194361 | 195781 | 1421 | 0.68 | 98.17 |
| scaffold07909 | 1   | 1412 | 1412 | 100   | C_unshiu_01434 | 21507  | 22919  | 1413 | 2.07 | 99.08 |
| scaffold07912 | 1   | 1411 | 1411 | 99.93 | C_unshiu_00084 | 453809 | 455226 | 1418 | 0.3  | 99.51 |
| scaffold07915 | 1   | 1411 | 1411 | 100   | C_unshiu_00309 | 233059 | 231650 | 1410 | 0.54 | 98.17 |
| scaffold07919 | 1   | 1410 | 1410 | 100   | C_unshiu_00165 | 185984 | 187393 | 1410 | 0.38 | 100   |
| scaffold07921 | 1   | 1364 | 1364 | 96.74 | C_unshiu_00357 | 235945 | 237307 | 1363 | 0.57 | 99.12 |
| scaffold07923 | 1   | 1405 | 1405 | 99.57 | C_unshiu_00028 | 600610 | 599201 | 1410 | 0.2  | 99.57 |
| scaffold07925 | 1   | 1409 | 1409 | 100   | C_unshiu_00199 | 195412 | 193989 | 1424 | 0.42 | 98.31 |
| scaffold07927 | 1   | 1194 | 1194 | 84.8  | C_unshiu_00870 | 44230  | 43037  | 1194 | 0.99 | 99.5  |
| scaffold07930 | 1   | 1408 | 1408 | 100   | C_unshiu_00793 | 110723 | 109310 | 1414 | 1.1  | 98.1  |
| scaffold07933 | 1   | 1406 | 1406 | 100   | C_unshiu_00030 | 544631 | 543218 | 1414 | 0.2  | 99.29 |
| scaffold07937 | 1   | 1315 | 1315 | 93.59 | C_unshiu_01009 | 52217  | 50903  | 1315 | 1.25 | 99.01 |
| scaffold07942 | 1   | 1403 | 1403 | 100   | C_unshiu_01046 | 52185  | 53589  | 1405 | 1.39 | 99.57 |
| scaffold07943 | 4   | 1404 | 1401 | 99.79 | C_unshiu_00246 | 213702 | 215108 | 1407 | 0.47 | 99.57 |
| scaffold07944 | 1   | 1403 | 1403 | 100   | C_unshiu_00069 | 312335 | 313737 | 1403 | 0.27 | 99.57 |
| scaffold07947 | 1   | 1403 | 1403 | 100   | C_unshiu_01195 | 42275  | 40873  | 1403 | 1.63 | 99.57 |
| scaffold07949 | 1   | 1402 | 1402 | 100   | C_unshiu_00578 | 81734  | 83141  | 1408 | 0.82 | 99.57 |
| scaffold07952 | 1   | 1039 | 1039 | 74.16 | C_unshiu_00296 | 134174 | 133151 | 1024 | 0.38 | 98.08 |
| scaffold07953 | 1   | 1401 | 1401 | 100   | C_unshiu_00322 | 30062  | 31469  | 1408 | 0.55 | 99.08 |
| scaffold07954 | 1   | 1401 | 1401 | 100   | C_unshiu_00157 | 312412 | 313818 | 1407 | 0.37 | 99.22 |
| scaffold07963 | 1   | 1399 | 1399 | 100   | C_unshiu_01698 | 36842  | 35444  | 1399 | 2.66 | 100   |
| scaffold07964 | 1   | 1364 | 1364 | 97.5  | C_unshiu_01219 | 60939  | 62303  | 1365 | 1.63 | 99.05 |
| scaffold07968 | 1   | 1398 | 1398 | 100   | C_unshiu_01859 | 17904  | 19300  | 1397 | 3.02 | 99.93 |
| scaffold07971 | 1   | 1398 | 1398 | 100   | C_unshiu_00243 | 265857 | 267254 | 1398 | 0.47 | 100   |
| scaffold07975 | 1   | 1397 | 1397 | 100   | C_unshiu_01228 | 67019  | 68421  | 1403 | 1.7  | 98.58 |
| scaffold07976 | 1   | 1397 | 1397 | 100   | C_unshiu_00207 | 255012 | 256408 | 1397 | 0.42 | 100   |
| scaffold07979 | 1   | 1396 | 1396 | 100   | C_unshiu_02101 | 15001  | 16384  | 1384 | 3.8  | 98.14 |
| scaffold07985 | 1   | 1394 | 1394 | 100   | C_unshiu_00760 | 122678 | 124071 | 1394 | 1.03 | 99.93 |
| scaffold07986 | 1   | 1391 | 1391 | 100   | C_unshiu_00481 | 104959 | 103569 | 1391 | 0.7  | 99.64 |
| scaffold07988 | 1   | 1393 | 1393 | 100   | C_unshiu_00095 | 149620 | 148228 | 1393 | 0.3  | 100   |
| scaffold07989 | 1   | 1393 | 1393 | 100   | C_unshiu_00038 | 564054 | 562663 | 1392 | 0.21 | 99.5  |
| scaffold07993 | 1   | 1392 | 1392 | 100   | C_unshiu_01545 | 14784  | 16181  | 1398 | 2.3  | 99.57 |
| scaffold07996 | 1   | 1391 | 1391 | 100   | C_unshiu_00180 | 109468 | 108075 | 1394 | 0.39 | 99.78 |
| scaffold07997 | 1   | 1391 | 1391 | 100   | C_unshiu_01845 | 29438  | 30828  | 1391 | 2.98 | 100   |
| scaffold08003 | 1   | 1397 | 1397 | 100   | C_unshiu_00563 | 20159  | 21564  | 1406 | 0.8  | 99.36 |
| scaffold08010 | 1   | 1388 | 1388 | 100   | C_unshiu_01185 | 71284  | 72682  | 1399 | 1.61 | 99.21 |
| scaffold08017 | 1   | 1167 | 1167 | 84.14 | C_unshiu_00101 | 176061 | 174895 | 1167 | 0.26 | 100   |
| scaffold08017 | 180 | 1387 | 1208 | 87.09 | C_unshiu_02879 | 7695   | 6487   | 1209 | 7.44 | 99.59 |
| scaffold08020 | 1   | 1386 | 1386 | 100   | C_unshiu_01269 | 37463  | 38848  | 1386 | 1.74 | 100   |
| scaffold08023 | 1   | 1385 | 1385 | 100   | C_unshiu_02721 | 9604   | 8220   | 1385 | 7.15 | 100   |
| scaffold08024 | 1   | 1385 | 1385 | 100   | C_unshiu_02226 | 15229  | 16612  | 1384 | 4.28 | 99.57 |
| scaffold08027 | 1   | 1384 | 1384 | 100   | C_unshiu_00458 | 96255  | 94872  | 1384 | 0.67 | 100   |
| scaffold08028 | 1   | 1384 | 1384 | 100   | C_unshiu_00222 | 299392 | 300777 | 1386 | 0.44 | 99.78 |
| scaffold08040 | 1   | 1249 | 1249 | 90.51 | C_unshiu_00645 | 41047  | 42316  | 1270 | 0.8  | 98.27 |
| scaffold08042 | 1   | 1382 | 1382 | 100   | C_unshiu_02184 | 31791  | 30405  | 1387 | 4.1  | 99.64 |
| scaffold08043 | 1   | 1380 | 1380 | 100   | C_unshiu_01269 | 68438  | 67059  | 1380 | 1.73 | 99.78 |
| scaffold08046 | 223 | 1311 | 1089 | 78.97 | C_unshiu_00231 | 149659 | 150744 | 1086 | 0.35 | 98.44 |
| scaffold08050 | 28  | 1368 | 1341 | 98.03 | C_unshiu_00055 | 514699 | 516039 | 1341 | 0.23 | 99.85 |
| scaffold08061 | 6   | 1377 | 1372 | 99.64 | C_unshiu_00671 | 62546  | 63936  | 1391 | 0.92 | 98.42 |
| scaffold08062 | 1   | 1369 | 1369 | 100   | C_unshiu_00801 | 3814   | 2446   | 1369 | 1.07 | 99.85 |
| scaffold08076 | 1   | 1180 | 1180 | 86.07 | C_unshiu_00583 | 125163 | 123983 | 1181 | 0.69 | 99.92 |
| scaffold08077 | 1   | 1371 | 1371 | 100   | C_unshiu_00567 | 174163 | 172793 | 1371 | 0.78 | 99.27 |
| scaffold08078 | 1   | 1370 | 1370 | 100   | C_unshiu_00132 | 223135 | 224511 | 1377 | 0.33 | 98.55 |
| scaffold08079 | 1   | 1371 | 1371 | 100   | C_unshiu_00144 | 337183 | 338558 | 1376 | 0.35 | 99.13 |
| scaffold08080 | 1   | 1359 | 1359 | 99.34 | C_unshiu_02338 | 28179  | 26821  | 1359 | 4.73 | 99.71 |
| scaffold08083 | 1   | 1370 | 1370 | 100   | C_unshiu_00349 | 15541  | 14172  | 1370 | 0.56 | 100   |
| scaffold08084 | 1   | 1368 | 1368 | 99.85 | C_unshiu_01128 | 4897   | 6264   | 1368 | 1.48 | 99.93 |
| scaffold08086 | 1   | 1366 | 1366 | 100   | C_unshiu_01092 | 21855  | 23211  | 1357 | 1.4  | 98.1  |
| scaffold08087 | 1   | 1370 | 1370 | 100   | C_unshiu_00144 | 165510 | 166883 | 1374 | 0.35 | 99.35 |
| scaffold08089 | 1   | 1369 | 1369 | 100   | C_unshiu_00410 | 114856 | 116224 | 1369 | 0.62 | 100   |
| scaffold08090 | 1   | 1369 | 1369 | 100   | C_unshiu_00053 | 89216  | 87848  | 1369 | 0.23 | 99.93 |

|               |     |      |      |       |                |        |        |      |      |       |
|---------------|-----|------|------|-------|----------------|--------|--------|------|------|-------|
| scaffold08091 | 1   | 1124 | 1124 | 82.1  | C_unshiu_01918 | 34044  | 35168  | 1125 | 2.56 | 99.47 |
| scaffold08093 | 1   | 1369 | 1369 | 100   | C_unshiu_00114 | 30238  | 28866  | 1373 | 0.32 | 98.4  |
| scaffold08096 | 1   | 1364 | 1364 | 100   | C_unshiu_00673 | 60037  | 58674  | 1364 | 0.91 | 100   |
| scaffold08097 | 1   | 1367 | 1367 | 100   | C_unshiu_02811 | 13128  | 11762  | 1367 | 7.75 | 100   |
| scaffold08098 | 1   | 1368 | 1368 | 100   | C_unshiu_00261 | 242732 | 244098 | 1367 | 0.48 | 98.98 |
| scaffold08099 | 1   | 1367 | 1367 | 100   | C_unshiu_00760 | 76021  | 77387  | 1367 | 1.01 | 100   |
| scaffold08104 | 38  | 1364 | 1327 | 97.29 | C_unshiu_01170 | 1      | 1327   | 1327 | 1.5  | 99.62 |
| scaffold08107 | 1   | 1020 | 1020 | 74.83 | C_unshiu_00045 | 403036 | 402015 | 1022 | 0.16 | 98.73 |
| scaffold08108 | 1   | 1362 | 1362 | 100   | C_unshiu_02101 | 9388   | 10749  | 1362 | 3.74 | 99.05 |
| scaffold08109 | 1   | 1362 | 1362 | 100   | C_unshiu_00871 | 98684  | 97323  | 1362 | 1.13 | 98.68 |
| scaffold08110 | 1   | 1358 | 1358 | 99.93 | C_unshiu_02126 | 10229  | 8871   | 1359 | 3.8  | 99.19 |
| scaffold08112 | 1   | 1082 | 1082 | 79.33 | C_unshiu_00404 | 108394 | 109477 | 1084 | 0.49 | 99.82 |
| scaffold08113 | 250 | 1361 | 1112 | 81.7  | C_unshiu_00169 | 112210 | 111097 | 1114 | 0.3  | 99.01 |
| scaffold08117 | 1   | 1361 | 1361 | 100   | C_unshiu_02263 | 14676  | 16036  | 1361 | 4.38 | 100   |
| scaffold08119 | 1   | 1358 | 1358 | 100   | C_unshiu_02121 | 25459  | 26816  | 1358 | 3.79 | 99.85 |
| scaffold08123 | 5   | 1357 | 1353 | 99.71 | C_unshiu_00663 | 17560  | 16208  | 1353 | 0.88 | 100   |
| scaffold08130 | 1   | 1356 | 1356 | 100   | C_unshiu_00438 | 68040  | 66686  | 1355 | 0.64 | 99.26 |
| scaffold08131 | 1   | 1155 | 1155 | 85.18 | C_unshiu_02040 | 26225  | 27379  | 1155 | 2.95 | 99.57 |
| scaffold08133 | 360 | 1360 | 1001 | 73.6  | C_unshiu_00817 | 110490 | 111495 | 1006 | 0.79 | 98.31 |
| scaffold08136 | 1   | 1061 | 1061 | 78.3  | C_unshiu_00652 | 130075 | 131133 | 1059 | 0.68 | 98.4  |
| scaffold08137 | 1   | 1355 | 1355 | 100   | C_unshiu_01170 | 5016   | 6373   | 1358 | 1.54 | 99.48 |
| scaffold08138 | 1   | 1354 | 1354 | 100   | C_unshiu_00817 | 56203  | 57558  | 1356 | 1.07 | 99.48 |
| scaffold08149 | 1   | 1353 | 1353 | 100   | C_unshiu_00223 | 162919 | 161557 | 1363 | 0.43 | 98.61 |
| scaffold08151 | 1   | 1352 | 1352 | 100   | C_unshiu_01140 | 49598  | 50949  | 1352 | 1.47 | 100   |
| scaffold08157 | 1   | 1164 | 1164 | 86.22 | C_unshiu_00232 | 7361   | 8524   | 1164 | 0.38 | 99.4  |
| scaffold08161 | 1   | 1349 | 1349 | 100   | C_unshiu_00285 | 131692 | 133039 | 1348 | 0.49 | 99.33 |
| scaffold08163 | 1   | 1348 | 1348 | 100   | C_unshiu_01163 | 77777  | 76429  | 1349 | 1.51 | 99.7  |
| scaffold08169 | 1   | 1346 | 1346 | 100   | C_unshiu_00009 | 144597 | 145942 | 1346 | 0.13 | 99.55 |
| scaffold08171 | 1   | 1346 | 1346 | 100   | C_unshiu_02321 | 14271  | 12926  | 1346 | 4.61 | 100   |
| scaffold08172 | 1   | 1346 | 1346 | 100   | C_unshiu_00138 | 366059 | 367404 | 1346 | 0.33 | 100   |
| scaffold08174 | 1   | 1346 | 1346 | 100   | C_unshiu_00134 | 338169 | 336817 | 1353 | 0.33 | 99.48 |
| scaffold08183 | 1   | 1013 | 1013 | 75.37 | C_unshiu_02401 | 20305  | 19293  | 1013 | 3.72 | 99.9  |
| scaffold08185 | 1   | 1029 | 1029 | 76.56 | C_unshiu_00749 | 93912  | 94940  | 1029 | 0.75 | 100   |
| scaffold08192 | 1   | 1342 | 1342 | 100   | C_unshiu_00975 | 80956  | 79614  | 1343 | 1.23 | 99.7  |
| scaffold08193 | 1   | 1347 | 1347 | 100   | C_unshiu_00186 | 54368  | 55717  | 1350 | 0.39 | 98.74 |
| scaffold08195 | 221 | 1341 | 1121 | 83.59 | C_unshiu_01976 | 2778   | 1658   | 1121 | 2.7  | 100   |
| scaffold08197 | 1   | 1340 | 1340 | 100   | C_unshiu_00119 | 11605  | 10266  | 1340 | 0.31 | 99.4  |
| scaffold08200 | 1   | 1339 | 1339 | 100   | C_unshiu_00510 | 113285 | 114626 | 1342 | 0.71 | 98.37 |
| scaffold08202 | 113 | 1339 | 1227 | 91.64 | C_unshiu_00603 | 35482  | 34263  | 1220 | 0.73 | 98.45 |
| scaffold08210 | 1   | 1191 | 1191 | 89.01 | C_unshiu_00798 | 25007  | 26206  | 1200 | 0.93 | 98.92 |
| scaffold08211 | 1   | 1338 | 1338 | 100   | C_unshiu_01809 | 46755  | 45419  | 1337 | 2.77 | 99.93 |
| scaffold08212 | 1   | 1338 | 1338 | 100   | C_unshiu_00510 | 107180 | 108523 | 1344 | 0.71 | 98.66 |
| scaffold08220 | 80  | 1336 | 1257 | 94.09 | C_unshiu_00600 | 56239  | 57495  | 1257 | 0.75 | 99.28 |
| scaffold08221 | 1   | 1336 | 1336 | 100   | C_unshiu_00097 | 57788  | 59123  | 1336 | 0.29 | 100   |
| scaffold08222 | 1   | 1336 | 1336 | 100   | C_unshiu_00223 | 105253 | 103918 | 1336 | 0.43 | 98.43 |
| scaffold08223 | 1   | 1350 | 1350 | 100   | C_unshiu_00150 | 292713 | 294077 | 1365 | 0.35 | 98.1  |
| scaffold08233 | 1   | 1331 | 1331 | 100   | C_unshiu_00135 | 219065 | 220396 | 1332 | 0.33 | 99.92 |
| scaffold08254 | 1   | 1326 | 1326 | 100   | C_unshiu_00913 | 113258 | 111928 | 1331 | 1.15 | 98.95 |
| scaffold08255 | 1   | 1327 | 1327 | 100   | C_unshiu_00095 | 278608 | 277282 | 1327 | 0.29 | 100   |
| scaffold08256 | 1   | 1325 | 1325 | 100   | C_unshiu_00417 | 112586 | 113912 | 1327 | 0.6  | 98.42 |
| scaffold08257 | 1   | 1309 | 1309 | 98.72 | C_unshiu_00453 | 205615 | 204309 | 1307 | 0.63 | 99.69 |
| scaffold08259 | 231 | 1324 | 1094 | 82.63 | C_unshiu_00089 | 465235 | 464140 | 1096 | 0.23 | 99.27 |
| scaffold08264 | 1   | 1325 | 1325 | 100   | C_unshiu_01482 | 10626  | 9297   | 1330 | 2.07 | 99.55 |
| scaffold08271 | 1   | 1319 | 1319 | 100   | C_unshiu_02100 | 3555   | 4873   | 1319 | 3.62 | 99.85 |
| scaffold08272 | 1   | 1321 | 1321 | 100   | C_unshiu_00599 | 122990 | 121664 | 1327 | 0.79 | 99.55 |
| scaffold08273 | 1   | 1322 | 1322 | 100   | C_unshiu_00869 | 53340  | 52019  | 1322 | 1.1  | 100   |
| scaffold08275 | 1   | 1293 | 1293 | 98.1  | C_unshiu_00188 | 106251 | 107547 | 1297 | 0.38 | 98.23 |
| scaffold08279 | 272 | 1320 | 1049 | 79.47 | C_unshiu_00199 | 21376  | 20327  | 1050 | 0.31 | 98.48 |
| scaffold08281 | 1   | 1313 | 1313 | 100   | C_unshiu_00760 | 110115 | 111427 | 1313 | 0.97 | 100   |
| scaffold08282 | 1   | 1319 | 1319 | 100   | C_unshiu_00459 | 166186 | 167505 | 1320 | 0.64 | 99.92 |
| scaffold08294 | 38  | 1317 | 1280 | 97.19 | C_unshiu_00132 | 195845 | 197121 | 1277 | 0.31 | 98.91 |
| scaffold08295 | 1   | 1317 | 1317 | 100   | C_unshiu_02188 | 29704  | 31020  | 1317 | 3.91 | 99.01 |
| scaffold08305 | 1   | 1314 | 1314 | 100   | C_unshiu_00267 | 73841  | 75174  | 1334 | 0.47 | 98.2  |
| scaffold08309 | 1   | 1313 | 1313 | 100   | C_unshiu_00016 | 580566 | 581878 | 1313 | 0.15 | 99.92 |
| scaffold08316 | 1   | 1083 | 1083 | 82.61 | C_unshiu_01588 | 38540  | 37457  | 1084 | 1.86 | 99.63 |
| scaffold08319 | 1   | 1100 | 1100 | 83.91 | C_unshiu_01136 | 12253  | 13352  | 1100 | 1.19 | 99.91 |
| scaffold08322 | 1   | 1310 | 1310 | 100   | C_unshiu_00092 | 198281 | 199591 | 1311 | 0.28 | 99.92 |
| scaffold08323 | 120 | 1207 | 1088 | 83.05 | C_unshiu_00177 | 350018 | 351105 | 1088 | 0.3  | 98.16 |
| scaffold08325 | 1   | 1309 | 1309 | 100   | C_unshiu_01210 | 18376  | 17075  | 1302 | 1.55 | 99.47 |
| scaffold08326 | 1   | 1309 | 1309 | 100   | C_unshiu_00870 | 95132  | 93813  | 1320 | 1.09 | 98.48 |
| scaffold08331 | 1   | 1307 | 1307 | 100   | C_unshiu_00003 | 193875 | 195198 | 1324 | 0.1  | 98.11 |
| scaffold08332 | 1   | 1308 | 1308 | 100   | C_unshiu_00450 | 154257 | 155564 | 1308 | 0.63 | 99.39 |
| scaffold08334 | 1   | 1307 | 1307 | 100   | C_unshiu_02041 | 20211  | 21517  | 1307 | 3.34 | 99.92 |
| scaffold08335 | 1   | 1307 | 1307 | 100   | C_unshiu_01061 | 14626  | 13320  | 1307 | 1.32 | 99.92 |
| scaffold08338 | 1   | 1306 | 1306 | 100   | C_unshiu_00012 | 749380 | 748075 | 1306 | 0.14 | 99.77 |
| scaffold08349 | 1   | 1304 | 1304 | 100   | C_unshiu_00913 | 3843   | 5146   | 1304 | 1.13 | 99.31 |
| scaffold08350 | 1   | 1301 | 1301 | 99.77 | C_unshiu_00248 | 97159  | 95859  | 1301 | 0.44 | 99.92 |
| scaffold08352 | 1   | 1304 | 1304 | 100   | C_unshiu_00116 | 139543 | 138240 | 1304 | 0.3  | 99.85 |
| scaffold08353 | 1   | 1304 | 1304 | 100   | C_unshiu_00222 | 78163  | 76860  | 1304 | 0.42 | 100   |

|               |    |      |      |       |                |        |        |      |      |       |
|---------------|----|------|------|-------|----------------|--------|--------|------|------|-------|
| scaffold08354 | 1  | 1303 | 1303 | 100   | C_unshiu_00135 | 247978 | 246676 | 1303 | 0.32 | 100   |
| scaffold08360 | 1  | 1302 | 1302 | 100   | C_unshiu_01825 | 22458  | 23759  | 1302 | 2.74 | 99.77 |
| scaffold08361 | 1  | 1301 | 1301 | 100   | C_unshiu_00120 | 155998 | 154695 | 1304 | 0.31 | 98.85 |
| scaffold08362 | 1  | 1301 | 1301 | 100   | C_unshiu_00507 | 62155  | 60853  | 1303 | 0.69 | 99.31 |
| scaffold08363 | 1  | 1301 | 1301 | 100   | C_unshiu_00273 | 250412 | 251712 | 1301 | 0.47 | 99.23 |
| scaffold08364 | 1  | 1301 | 1301 | 100   | C_unshiu_00233 | 59200  | 60500  | 1301 | 0.43 | 99.62 |
| scaffold08366 | 1  | 1301 | 1301 | 100   | C_unshiu_00601 | 148889 | 147589 | 1301 | 0.78 | 99.92 |
| scaffold08368 | 1  | 1300 | 1300 | 100   | C_unshiu_02082 | 6200   | 4901   | 1300 | 3.49 | 100   |
| scaffold08369 | 1  | 1300 | 1300 | 100   | C_unshiu_00568 | 159948 | 158649 | 1300 | 0.74 | 99.39 |
| scaffold08370 | 1  | 1300 | 1300 | 100   | C_unshiu_00199 | 295306 | 296605 | 1300 | 0.39 | 99.92 |
| scaffold08372 | 1  | 1299 | 1299 | 100   | C_unshiu_00113 | 35190  | 33889  | 1302 | 0.3  | 99.54 |
| scaffold08375 | 28 | 1298 | 1271 | 97.92 | C_unshiu_01709 | 36760  | 38022  | 1263 | 2.42 | 98.74 |
| scaffold08378 | 1  | 1298 | 1298 | 100   | C_unshiu_00312 | 158304 | 159615 | 1312 | 0.5  | 98.93 |
| scaffold08379 | 1  | 1298 | 1298 | 100   | C_unshiu_01072 | 45890  | 44593  | 1298 | 1.32 | 100   |
| scaffold08383 | 1  | 1297 | 1297 | 100   | C_unshiu_00015 | 854990 | 856270 | 1281 | 0.15 | 98.77 |
| scaffold08388 | 1  | 1295 | 1295 | 100   | C_unshiu_00707 | 19727  | 18432  | 1296 | 0.91 | 98.77 |
| scaffold08390 | 1  | 1295 | 1295 | 100   | C_unshiu_00538 | 97050  | 95755  | 1296 | 0.71 | 98.92 |
| scaffold08392 | 1  | 1295 | 1295 | 100   | C_unshiu_00693 | 38450  | 39747  | 1298 | 0.9  | 99    |
| scaffold08394 | 1  | 1294 | 1294 | 100   | C_unshiu_01827 | 14359  | 15652  | 1294 | 2.73 | 100   |
| scaffold08395 | 1  | 1098 | 1098 | 84.92 | C_unshiu_01849 | 17072  | 15975  | 1098 | 2.36 | 99.82 |
| scaffold08399 | 1  | 1291 | 1291 | 100   | C_unshiu_00736 | 29451  | 28161  | 1291 | 0.93 | 100   |
| scaffold08402 | 1  | 1290 | 1290 | 100   | C_unshiu_02150 | 22992  | 24281  | 1290 | 3.67 | 100   |
| scaffold08405 | 1  | 1068 | 1068 | 82.85 | C_unshiu_00432 | 122292 | 121226 | 1067 | 0.5  | 99.91 |
| scaffold08408 | 1  | 1288 | 1288 | 100   | C_unshiu_00608 | 95111  | 96398  | 1288 | 0.78 | 99.61 |
| scaffold08411 | 1  | 1288 | 1288 | 100   | C_unshiu_00103 | 155867 | 154578 | 1290 | 0.29 | 98.84 |
| scaffold08413 | 1  | 1287 | 1287 | 100   | C_unshiu_00146 | 22383  | 21097  | 1287 | 0.33 | 100   |
| scaffold08416 | 1  | 1287 | 1287 | 100   | C_unshiu_00962 | 47809  | 49095  | 1287 | 1.16 | 99.84 |
| scaffold08417 | 1  | 1287 | 1287 | 100   | C_unshiu_01030 | 93995  | 95283  | 1289 | 1.25 | 99.84 |
| scaffold08419 | 1  | 1231 | 1231 | 95.72 | C_unshiu_00570 | 110749 | 111977 | 1229 | 0.71 | 99.59 |
| scaffold08420 | 1  | 1278 | 1278 | 100   | C_unshiu_02799 | 6702   | 5431   | 1272 | 7.1  | 98.52 |
| scaffold08421 | 3  | 1281 | 1279 | 99.84 | C_unshiu_01625 | 39291  | 40562  | 1272 | 2.26 | 98.21 |
| scaffold08430 | 9  | 1284 | 1276 | 99.38 | C_unshiu_00918 | 95566  | 96841  | 1276 | 1.11 | 99.92 |
| scaffold08434 | 1  | 1282 | 1282 | 100   | C_unshiu_00323 | 39851  | 41134  | 1284 | 0.5  | 99.69 |
| scaffold08437 | 3  | 1281 | 1279 | 99.84 | C_unshiu_00137 | 187294 | 188573 | 1280 | 0.32 | 99.77 |
| scaffold08440 | 3  | 1281 | 1279 | 99.84 | C_unshiu_00867 | 112567 | 111289 | 1279 | 1.06 | 100   |
| scaffold08441 | 1  | 1281 | 1281 | 100   | C_unshiu_00375 | 157055 | 158339 | 1285 | 0.55 | 99.46 |
| scaffold08444 | 1  | 1281 | 1281 | 100   | C_unshiu_00321 | 238645 | 239928 | 1284 | 0.5  | 99.38 |
| scaffold08448 | 1  | 1280 | 1280 | 100   | C_unshiu_00086 | 420880 | 419601 | 1280 | 0.27 | 99.92 |
| scaffold08453 | 1  | 1279 | 1279 | 100   | C_unshiu_00531 | 155101 | 156380 | 1280 | 0.7  | 99.92 |
| scaffold08455 | 1  | 1278 | 1278 | 100   | C_unshiu_00383 | 58812  | 57532  | 1281 | 0.56 | 99.53 |
| scaffold08456 | 1  | 1278 | 1278 | 100   | C_unshiu_00375 | 83679  | 82402  | 1278 | 0.55 | 100   |
| scaffold08460 | 2  | 1243 | 1242 | 97.18 | C_unshiu_01370 | 70374  | 69130  | 1245 | 1.71 | 99.52 |
| scaffold08462 | 1  | 1278 | 1278 | 100   | C_unshiu_00051 | 288842 | 287565 | 1278 | 0.21 | 99.84 |
| scaffold08463 | 1  | 1278 | 1278 | 100   | C_unshiu_02863 | 7770   | 9056   | 1287 | 7.79 | 99.07 |
| scaffold08464 | 1  | 1277 | 1277 | 100   | C_unshiu_00223 | 306140 | 304864 | 1277 | 0.41 | 99.92 |
| scaffold08465 | 1  | 1277 | 1277 | 100   | C_unshiu_00144 | 183130 | 181849 | 1282 | 0.32 | 98.68 |
| scaffold08469 | 1  | 1284 | 1284 | 100   | C_unshiu_00503 | 105225 | 103933 | 1293 | 0.68 | 98.22 |
| scaffold08471 | 1  | 1277 | 1277 | 100   | C_unshiu_00069 | 379398 | 380661 | 1264 | 0.24 | 98.12 |
| scaffold08472 | 1  | 1009 | 1009 | 79.01 | C_unshiu_00406 | 17529  | 18536  | 1008 | 0.45 | 99.9  |
| scaffold08474 | 1  | 1275 | 1275 | 100   | C_unshiu_00459 | 137535 | 138802 | 1268 | 0.62 | 98.44 |
| scaffold08475 | 1  | 1275 | 1275 | 100   | C_unshiu_00217 | 7172   | 8446   | 1275 | 0.4  | 100   |
| scaffold08476 | 1  | 1275 | 1275 | 100   | C_unshiu_02351 | 8369   | 7095   | 1275 | 4.49 | 99.45 |
| scaffold08477 | 1  | 1067 | 1067 | 83.69 | C_unshiu_01777 | 5517   | 6584   | 1068 | 2.16 | 99.91 |
| scaffold08479 | 1  | 1284 | 1284 | 100   | C_unshiu_00488 | 145166 | 146455 | 1290 | 0.66 | 98.84 |
| scaffold08481 | 1  | 1274 | 1274 | 100   | C_unshiu_00474 | 161323 | 160050 | 1274 | 0.63 | 99.22 |
| scaffold08482 | 1  | 1274 | 1274 | 100   | C_unshiu_00257 | 521    | 1796   | 1276 | 0.44 | 98.35 |
| scaffold08483 | 1  | 1273 | 1273 | 100   | C_unshiu_01060 | 1914   | 642    | 1273 | 1.28 | 99.22 |
| scaffold08485 | 1  | 1274 | 1274 | 100   | C_unshiu_00805 | 77435  | 76159  | 1277 | 1    | 99.77 |
| scaffold08492 | 1  | 1271 | 1271 | 100   | C_unshiu_00192 | 338973 | 340243 | 1271 | 0.37 | 100   |
| scaffold08493 | 1  | 1271 | 1271 | 100   | C_unshiu_00032 | 81230  | 79960  | 1271 | 0.18 | 100   |
| scaffold08497 | 1  | 1223 | 1223 | 96.3  | C_unshiu_01777 | 46823  | 48045  | 1223 | 2.47 | 99.26 |
| scaffold08502 | 1  | 1269 | 1269 | 100   | C_unshiu_02035 | 15446  | 16713  | 1268 | 3.22 | 98.82 |
| scaffold08503 | 1  | 1269 | 1269 | 100   | C_unshiu_00522 | 124301 | 125569 | 1269 | 0.69 | 99.76 |
| scaffold08505 | 1  | 1268 | 1268 | 100   | C_unshiu_00939 | 38273  | 39540  | 1268 | 1.13 | 100   |
| scaffold08506 | 1  | 1268 | 1268 | 100   | C_unshiu_01567 | 120    | 1389   | 1270 | 2.14 | 99.84 |
| scaffold08507 | 1  | 1268 | 1268 | 100   | C_unshiu_00217 | 27552  | 28823  | 1272 | 0.4  | 99.69 |
| scaffold08509 | 1  | 1237 | 1237 | 97.63 | C_unshiu_02213 | 6022   | 4786   | 1237 | 3.77 | 99.92 |
| scaffold08513 | 1  | 1266 | 1266 | 100   | C_unshiu_00488 | 40092  | 38827  | 1266 | 0.65 | 99.68 |
| scaffold08516 | 1  | 1186 | 1186 | 93.68 | C_unshiu_02374 | 7886   | 6705   | 1182 | 4.25 | 98.99 |
| scaffold08521 | 1  | 1265 | 1265 | 100   | C_unshiu_00618 | 92763  | 91499  | 1265 | 0.77 | 99.92 |
| scaffold08522 | 1  | 1143 | 1143 | 90.36 | C_unshiu_00001 | 682319 | 681173 | 1147 | 0.04 | 99.39 |
| scaffold08524 | 17 | 1264 | 1248 | 98.73 | C_unshiu_00648 | 28038  | 26785  | 1254 | 0.8  | 98.72 |
| scaffold08527 | 1  | 1093 | 1093 | 86.54 | C_unshiu_00389 | 55380  | 54286  | 1095 | 0.49 | 98.45 |
| scaffold08531 | 1  | 1097 | 1097 | 86.93 | C_unshiu_00123 | 58660  | 57564  | 1097 | 0.26 | 100   |
| scaffold08532 | 1  | 1262 | 1262 | 100   | C_unshiu_00229 | 255277 | 256538 | 1262 | 0.41 | 100   |
| scaffold08533 | 1  | 1262 | 1262 | 100   | C_unshiu_00021 | 405495 | 406755 | 1261 | 0.16 | 99.6  |
| scaffold08538 | 1  | 1260 | 1260 | 100   | C_unshiu_00393 | 120570 | 121828 | 1259 | 0.56 | 98.1  |
| scaffold08542 | 1  | 1196 | 1196 | 95.15 | C_unshiu_00150 | 206489 | 207687 | 1199 | 0.31 | 98.09 |
| scaffold08550 | 1  | 1257 | 1257 | 100   | C_unshiu_02597 | 1589   | 324    | 1266 | 5.71 | 98.89 |

|               |     |      |      |       |                |         |         |      |      |       |
|---------------|-----|------|------|-------|----------------|---------|---------|------|------|-------|
| scaffold08552 | 1   | 1256 | 1256 | 100   | C_unshiu_01189 | 67023   | 68278   | 1256 | 1.45 | 99.92 |
| scaffold08553 | 1   | 1258 | 1258 | 100   | C_unshiu_00078 | 435421  | 434163  | 1259 | 0.25 | 98.97 |
| scaffold08558 | 1   | 1255 | 1255 | 100   | C_unshiu_00353 | 5531    | 6785    | 1255 | 0.53 | 99.52 |
| scaffold08562 | 1   | 1254 | 1254 | 100   | C_unshiu_00281 | 77400   | 78653   | 1254 | 0.45 | 98.17 |
| scaffold08563 | 7   | 1254 | 1248 | 99.52 | C_unshiu_00144 | 48517   | 47292   | 1226 | 0.31 | 98.24 |
| scaffold08564 | 1   | 1253 | 1253 | 100   | C_unshiu_00551 | 173356  | 174608  | 1253 | 0.7  | 99.92 |
| scaffold08569 | 1   | 1252 | 1252 | 100   | C_unshiu_02400 | 3184    | 4437    | 1254 | 4.6  | 99.36 |
| scaffold08575 | 3   | 1103 | 1101 | 88.15 | C_unshiu_00015 | 878151  | 877061  | 1091 | 0.12 | 98.19 |
| scaffold08577 | 1   | 1249 | 1249 | 100   | C_unshiu_00637 | 6959    | 8207    | 1249 | 0.78 | 99.84 |
| scaffold08578 | 1   | 1145 | 1145 | 91.67 | C_unshiu_01466 | 43465   | 44609   | 1145 | 1.75 | 100   |
| scaffold08584 | 1   | 1248 | 1248 | 100   | C_unshiu_00852 | 49027   | 47781   | 1247 | 1.02 | 99.92 |
| scaffold08586 | 1   | 1248 | 1248 | 100   | C_unshiu_01304 | 25344   | 26591   | 1248 | 1.61 | 99.92 |
| scaffold08588 | 1   | 1076 | 1076 | 86.29 | C_unshiu_00357 | 132932  | 134007  | 1076 | 0.45 | 98.05 |
| scaffold08590 | 1   | 1246 | 1246 | 100   | C_unshiu_01996 | 31516   | 30271   | 1246 | 3.06 | 99.92 |
| scaffold08591 | 1   | 1246 | 1246 | 100   | C_unshiu_01672 | 52535   | 53763   | 1229 | 2.28 | 98.32 |
| scaffold08593 | 1   | 1245 | 1245 | 100   | C_unshiu_00001 | 1476981 | 1478228 | 1248 | 0.05 | 99.44 |
| scaffold08595 | 1   | 1245 | 1245 | 100   | C_unshiu_00824 | 57927   | 56683   | 1245 | 0.99 | 99.92 |
| scaffold08599 | 1   | 1244 | 1244 | 100   | C_unshiu_01171 | 79219   | 77976   | 1244 | 1.41 | 99.68 |
| scaffold08601 | 2   | 1244 | 1243 | 99.92 | C_unshiu_01493 | 6184    | 4944    | 1241 | 1.95 | 98.4  |
| scaffold08602 | 1   | 1244 | 1244 | 100   | C_unshiu_01513 | 25472   | 24229   | 1244 | 1.99 | 99.92 |
| scaffold08604 | 1   | 1243 | 1243 | 100   | C_unshiu_01059 | 3303    | 4545    | 1243 | 1.25 | 100   |
| scaffold08606 | 1   | 1243 | 1243 | 100   | C_unshiu_00154 | 290321  | 289085  | 1237 | 0.32 | 98.71 |
| scaffold08611 | 1   | 1242 | 1242 | 100   | C_unshiu_00021 | 336664  | 337906  | 1243 | 0.16 | 99.68 |
| scaffold08613 | 1   | 1242 | 1242 | 100   | C_unshiu_00261 | 85004   | 83760   | 1245 | 0.44 | 99.12 |
| scaffold08616 | 1   | 1241 | 1241 | 100   | C_unshiu_00936 | 59452   | 58212   | 1241 | 1.1  | 99.84 |
| scaffold08617 | 1   | 1241 | 1241 | 100   | C_unshiu_00212 | 324478  | 325723  | 1246 | 0.38 | 99.6  |
| scaffold08620 | 1   | 1239 | 1239 | 100   | C_unshiu_00263 | 178179  | 179417  | 1239 | 0.43 | 100   |
| scaffold08622 | 1   | 1243 | 1243 | 100   | C_unshiu_00104 | 434024  | 432782  | 1243 | 0.28 | 99.28 |
| scaffold08624 | 1   | 1202 | 1202 | 97.09 | C_unshiu_01457 | 25335   | 26536   | 1202 | 1.82 | 99.83 |
| scaffold08627 | 1   | 1238 | 1238 | 100   | C_unshiu_00657 | 55375   | 54137   | 1239 | 0.8  | 98.87 |
| scaffold08629 | 1   | 1238 | 1238 | 100   | C_unshiu_02399 | 10861   | 12098   | 1238 | 4.53 | 100   |
| scaffold08630 | 1   | 1239 | 1239 | 100   | C_unshiu_01065 | 4140    | 2903    | 1238 | 1.25 | 99.52 |
| scaffold08631 | 1   | 1238 | 1238 | 100   | C_unshiu_02590 | 12845   | 14082   | 1238 | 5.52 | 100   |
| scaffold08633 | 1   | 1237 | 1237 | 100   | C_unshiu_00922 | 24966   | 26202   | 1237 | 1.08 | 100   |
| scaffold08634 | 1   | 1237 | 1237 | 100   | C_unshiu_00160 | 301386  | 300150  | 1237 | 0.33 | 99.92 |
| scaffold08636 | 1   | 1237 | 1237 | 100   | C_unshiu_00477 | 35906   | 34670   | 1237 | 0.62 | 99.84 |
| scaffold08638 | 1   | 1237 | 1237 | 100   | C_unshiu_01430 | 32600   | 33836   | 1237 | 1.81 | 100   |
| scaffold08640 | 1   | 1236 | 1236 | 100   | C_unshiu_01023 | 23125   | 21913   | 1213 | 1.17 | 98.06 |
| scaffold08643 | 2   | 1235 | 1234 | 99.92 | C_unshiu_00914 | 18804   | 20036   | 1233 | 1.07 | 98.3  |
| scaffold08648 | 1   | 1233 | 1233 | 99.84 | C_unshiu_02768 | 2238    | 3470    | 1233 | 6.58 | 99.92 |
| scaffold08651 | 1   | 1234 | 1234 | 100   | C_unshiu_00317 | 111692  | 112925  | 1234 | 0.48 | 99.68 |
| scaffold08653 | 1   | 1234 | 1234 | 100   | C_unshiu_02669 | 15818   | 17051   | 1234 | 6.01 | 100   |
| scaffold08656 | 1   | 1233 | 1233 | 100   | C_unshiu_02338 | 25128   | 26360   | 1233 | 4.3  | 100   |
| scaffold08661 | 1   | 1232 | 1232 | 100   | C_unshiu_00523 | 97834   | 99065   | 1232 | 0.67 | 99.03 |
| scaffold08662 | 1   | 1232 | 1232 | 100   | C_unshiu_00207 | 220322  | 221554  | 1233 | 0.37 | 99.68 |
| scaffold08663 | 1   | 1232 | 1232 | 100   | C_unshiu_00430 | 109148  | 110383  | 1236 | 0.58 | 98.46 |
| scaffold08665 | 61  | 1223 | 1163 | 95.09 | C_unshiu_02411 | 9351    | 10513   | 1163 | 4.29 | 100   |
| scaffold08666 | 1   | 1231 | 1231 | 100   | C_unshiu_00533 | 158974  | 160205  | 1232 | 0.67 | 99.92 |
| scaffold08669 | 1   | 1230 | 1230 | 100   | C_unshiu_01516 | 15671   | 14440   | 1232 | 1.98 | 99.84 |
| scaffold08670 | 1   | 1109 | 1109 | 90.16 | C_unshiu_00509 | 150553  | 151665  | 1113 | 0.59 | 98.29 |
| scaffold08671 | 1   | 1230 | 1230 | 100   | C_unshiu_01234 | 58207   | 59440   | 1234 | 1.5  | 98.46 |
| scaffold08676 | 1   | 1229 | 1229 | 100   | C_unshiu_00049 | 294302  | 295529  | 1228 | 0.2  | 99.76 |
| scaffold08681 | 1   | 1228 | 1228 | 100   | C_unshiu_00794 | 49448   | 50675   | 1228 | 0.95 | 99.67 |
| scaffold08683 | 1   | 1228 | 1228 | 100   | C_unshiu_01031 | 24150   | 25377   | 1228 | 1.19 | 100   |
| scaffold08688 | 1   | 1226 | 1226 | 100   | C_unshiu_00875 | 72697   | 71472   | 1226 | 1.02 | 99.02 |
| scaffold08689 | 1   | 1227 | 1227 | 100   | C_unshiu_00986 | 20117   | 18892   | 1226 | 1.13 | 99.35 |
| scaffold08690 | 1   | 1226 | 1226 | 100   | C_unshiu_00482 | 17099   | 18324   | 1226 | 0.62 | 100   |
| scaffold08691 | 1   | 1226 | 1226 | 100   | C_unshiu_02698 | 14253   | 15478   | 1226 | 6.17 | 99.92 |
| scaffold08694 | 1   | 1225 | 1225 | 100   | C_unshiu_00166 | 45894   | 47118   | 1225 | 0.33 | 100   |
| scaffold08698 | 1   | 1088 | 1088 | 88.96 | C_unshiu_00948 | 15791   | 14706   | 1086 | 0.97 | 99.26 |
| scaffold08699 | 1   | 1224 | 1224 | 100   | C_unshiu_00115 | 65104   | 63884   | 1221 | 0.28 | 99.43 |
| scaffold08701 | 1   | 1224 | 1224 | 100   | C_unshiu_00537 | 148348  | 149571  | 1224 | 0.67 | 99.84 |
| scaffold08703 | 1   | 1223 | 1223 | 100   | C_unshiu_01263 | 44462   | 43240   | 1223 | 1.53 | 100   |
| scaffold08704 | 1   | 1222 | 1222 | 100   | C_unshiu_02333 | 1357    | 2578    | 1222 | 4.24 | 99.75 |
| scaffold08709 | 1   | 1222 | 1222 | 100   | C_unshiu_01794 | 38959   | 37738   | 1222 | 2.51 | 99.02 |
| scaffold08711 | 1   | 1203 | 1203 | 99.18 | C_unshiu_01420 | 57843   | 56641   | 1203 | 1.73 | 99.75 |
| scaffold08713 | 1   | 1132 | 1132 | 93.02 | C_unshiu_00179 | 150255  | 151388  | 1134 | 0.32 | 98.77 |
| scaffold08715 | 145 | 1220 | 1076 | 88.2  | C_unshiu_00274 | 158735  | 157645  | 1091 | 0.39 | 98.17 |
| scaffold08723 | 220 | 1219 | 1000 | 82.03 | C_unshiu_00454 | 147152  | 146152  | 1001 | 0.48 | 99.3  |
| scaffold08732 | 1   | 1218 | 1218 | 100   | C_unshiu_00611 | 15040   | 13823   | 1218 | 0.74 | 100   |
| scaffold08734 | 1   | 1217 | 1217 | 100   | C_unshiu_00353 | 76873   | 78090   | 1218 | 0.51 | 99.26 |
| scaffold08736 | 199 | 1211 | 1013 | 83.65 | C_unshiu_00091 | 79195   | 78191   | 1005 | 0.22 | 99.21 |
| scaffold08737 | 1   | 1215 | 1215 | 100   | C_unshiu_00111 | 358749  | 357532  | 1218 | 0.28 | 98.69 |
| scaffold08740 | 1   | 1217 | 1217 | 100   | C_unshiu_02067 | 13392   | 12166   | 1227 | 3.23 | 98.29 |
| scaffold08743 | 1   | 1216 | 1216 | 100   | C_unshiu_02018 | 4910    | 3692    | 1219 | 3.05 | 98.44 |
| scaffold08746 | 1   | 1215 | 1215 | 100   | C_unshiu_00531 | 77922   | 76708   | 1215 | 0.66 | 100   |
| scaffold08747 | 4   | 1220 | 1217 | 99.75 | C_unshiu_00249 | 123140  | 124357  | 1218 | 0.41 | 99.01 |
| scaffold08748 | 1   | 1214 | 1214 | 100   | C_unshiu_00237 | 93202   | 94418   | 1217 | 0.4  | 99.01 |
| scaffold08750 | 1   | 1214 | 1214 | 100   | C_unshiu_00222 | 310871  | 312084  | 1214 | 0.39 | 100   |

|               |     |      |      |       |                |        |        |      |      |       |
|---------------|-----|------|------|-------|----------------|--------|--------|------|------|-------|
| scaffold08754 | 1   | 1214 | 1214 | 100   | C_unshiu_00505 | 183168 | 181955 | 1214 | 0.64 | 100   |
| scaffold08757 | 33  | 1217 | 1185 | 97.37 | C_unshiu_00835 | 76877  | 75691  | 1187 | 0.96 | 98.91 |
| scaffold08763 | 1   | 1202 | 1202 | 99.17 | C_unshiu_00763 | 32691  | 33887  | 1197 | 0.89 | 99.25 |
| scaffold08765 | 1   | 1205 | 1205 | 99.26 | C_unshiu_00051 | 528949 | 527743 | 1207 | 0.2  | 99.67 |
| scaffold08766 | 1   | 1213 | 1213 | 100   | C_unshiu_00223 | 241713 | 240500 | 1214 | 0.39 | 98.19 |
| scaffold08769 | 1   | 1212 | 1212 | 100   | C_unshiu_00086 | 448636 | 447424 | 1213 | 0.26 | 99.59 |
| scaffold08773 | 1   | 1209 | 1209 | 100   | C_unshiu_00584 | 158267 | 159476 | 1210 | 0.71 | 99.92 |
| scaffold08785 | 1   | 1207 | 1207 | 100   | C_unshiu_00234 | 184968 | 183762 | 1207 | 0.4  | 98.01 |
| scaffold08793 | 1   | 1206 | 1206 | 100   | C_unshiu_01317 | 75309  | 74111  | 1199 | 1.58 | 98.26 |
| scaffold08796 | 1   | 1205 | 1205 | 100   | C_unshiu_00195 | 121008 | 119803 | 1206 | 0.35 | 98.67 |
| scaffold08797 | 1   | 1205 | 1205 | 100   | C_unshiu_00147 | 93478  | 92274  | 1205 | 0.31 | 100   |
| scaffold08799 | 1   | 1204 | 1204 | 100   | C_unshiu_00239 | 4701   | 5895   | 1195 | 0.39 | 99.25 |
| scaffold08802 | 1   | 1204 | 1204 | 100   | C_unshiu_00084 | 75243  | 76446  | 1204 | 0.25 | 98.26 |
| scaffold08806 | 1   | 1204 | 1204 | 100   | C_unshiu_01528 | 38243  | 39446  | 1204 | 1.95 | 99.83 |
| scaffold08808 | 1   | 1203 | 1203 | 100   | C_unshiu_01231 | 3389   | 4591   | 1203 | 1.46 | 100   |
| scaffold08812 | 1   | 1201 | 1201 | 100   | C_unshiu_01545 | 10732  | 9529   | 1204 | 1.98 | 98.59 |
| scaffold08813 | 104 | 1202 | 1099 | 91.43 | C_unshiu_00366 | 54542  | 55640  | 1099 | 0.47 | 99.91 |
| scaffold08816 | 1   | 1201 | 1201 | 100   | C_unshiu_00245 | 67582  | 66382  | 1201 | 0.4  | 100   |
| scaffold08817 | 1   | 1202 | 1202 | 100   | C_unshiu_00078 | 12949  | 14150  | 1202 | 0.24 | 99.17 |
| scaffold08818 | 1   | 1201 | 1201 | 100   | C_unshiu_00247 | 278510 | 279710 | 1201 | 0.4  | 100   |
| scaffold08819 | 1   | 1166 | 1166 | 97.09 | C_unshiu_01520 | 45474  | 44309  | 1166 | 1.87 | 99.83 |
| scaffold08824 | 1   | 1200 | 1200 | 100   | C_unshiu_00090 | 435139 | 433930 | 1210 | 0.26 | 99.01 |
| scaffold08828 | 1   | 1199 | 1199 | 100   | C_unshiu_00217 | 70240  | 71438  | 1199 | 0.37 | 99.58 |
| scaffold08829 | 1   | 1199 | 1199 | 100   | C_unshiu_01009 | 30945  | 29746  | 1200 | 1.14 | 99.5  |
| scaffold08831 | 1   | 1197 | 1197 | 100   | C_unshiu_01437 | 42213  | 41013  | 1201 | 1.77 | 99.58 |
| scaffold08833 | 1   | 1065 | 1065 | 88.97 | C_unshiu_00238 | 185414 | 186484 | 1071 | 0.35 | 98.69 |
| scaffold08837 | 1   | 1197 | 1197 | 100   | C_unshiu_00686 | 58597  | 59793  | 1197 | 0.82 | 99.75 |
| scaffold08842 | 1   | 1196 | 1196 | 100   | C_unshiu_00061 | 312181 | 313374 | 1194 | 0.21 | 99.33 |
| scaffold08845 | 21  | 1196 | 1176 | 98.33 | C_unshiu_00626 | 108092 | 106919 | 1174 | 0.73 | 98.89 |
| scaffold08847 | 1   | 1195 | 1195 | 100   | C_unshiu_00268 | 74654  | 75854  | 1201 | 0.43 | 99.42 |
| scaffold08852 | 1   | 1194 | 1194 | 100   | C_unshiu_01478 | 61419  | 60226  | 1194 | 1.85 | 99.66 |
| scaffold08853 | 1   | 1194 | 1194 | 100   | C_unshiu_00356 | 116385 | 115192 | 1194 | 0.5  | 100   |
| scaffold08855 | 1   | 1193 | 1193 | 100   | C_unshiu_00150 | 244000 | 245191 | 1192 | 0.31 | 99.83 |
| scaffold08857 | 1   | 1193 | 1193 | 100   | C_unshiu_00359 | 229545 | 230737 | 1193 | 0.5  | 100   |
| scaffold08859 | 1   | 1193 | 1193 | 100   | C_unshiu_01988 | 29271  | 28077  | 1195 | 2.92 | 99.5  |
| scaffold08863 | 1   | 1192 | 1192 | 100   | C_unshiu_00135 | 16788  | 15593  | 1196 | 0.29 | 99.25 |
| scaffold08866 | 5   | 1192 | 1188 | 99.66 | C_unshiu_00647 | 124408 | 125595 | 1188 | 0.75 | 99.92 |
| scaffold08867 | 1   | 1192 | 1192 | 100   | C_unshiu_00417 | 55567  | 56750  | 1184 | 0.54 | 98.49 |
| scaffold08868 | 1   | 1192 | 1192 | 100   | C_unshiu_00309 | 192661 | 193852 | 1192 | 0.46 | 99.83 |
| scaffold08875 | 1   | 1191 | 1191 | 100   | C_unshiu_00358 | 88290  | 87099  | 1192 | 0.5  | 99.41 |
| scaffold08876 | 1   | 1191 | 1191 | 100   | C_unshiu_01093 | 86224  | 85034  | 1191 | 1.23 | 99.92 |
| scaffold08880 | 1   | 1190 | 1190 | 100   | C_unshiu_00501 | 33110  | 31917  | 1194 | 0.62 | 99.41 |
| scaffold08881 | 1   | 1190 | 1190 | 100   | C_unshiu_00033 | 286151 | 287340 | 1190 | 0.17 | 99.92 |
| scaffold08882 | 1   | 1190 | 1190 | 100   | C_unshiu_02318 | 23636  | 22441  | 1196 | 4.08 | 99    |
| scaffold08883 | 70  | 1190 | 1121 | 94.2  | C_unshiu_00803 | 78058  | 79187  | 1130 | 0.88 | 98.5  |
| scaffold08884 | 5   | 1191 | 1187 | 99.66 | C_unshiu_02261 | 10550  | 11730  | 1181 | 3.79 | 99.41 |
| scaffold08888 | 1   | 1189 | 1189 | 100   | C_unshiu_00708 | 36699  | 35514  | 1186 | 0.83 | 99.16 |
| scaffold08889 | 1   | 1189 | 1189 | 100   | C_unshiu_00506 | 167422 | 166232 | 1191 | 0.63 | 99.83 |
| scaffold08890 | 1   | 1189 | 1189 | 100   | C_unshiu_00041 | 476165 | 477353 | 1189 | 0.18 | 100   |
| scaffold08891 | 1   | 1188 | 1188 | 100   | C_unshiu_01254 | 17777  | 18964  | 1188 | 1.47 | 100   |
| scaffold08893 | 1   | 1006 | 1006 | 84.68 | C_unshiu_02089 | 24397  | 25402  | 1006 | 2.72 | 100   |
| scaffold08894 | 1   | 1188 | 1188 | 100   | C_unshiu_00034 | 299933 | 301111 | 1179 | 0.17 | 98.82 |
| scaffold08898 | 1   | 1187 | 1187 | 100   | C_unshiu_00007 | 986491 | 985298 | 1194 | 0.11 | 98.83 |
| scaffold08900 | 1   | 1186 | 1186 | 100   | C_unshiu_00283 | 19410  | 18222  | 1189 | 0.43 | 98.4  |
| scaffold08905 | 1   | 1186 | 1186 | 100   | C_unshiu_01151 | 7644   | 8829   | 1186 | 1.31 | 100   |
| scaffold08906 | 6   | 1186 | 1181 | 99.58 | C_unshiu_01913 | 7058   | 5879   | 1180 | 2.67 | 99.92 |
| scaffold08908 | 1   | 1185 | 1185 | 100   | C_unshiu_00450 | 180343 | 179159 | 1185 | 0.57 | 100   |
| scaffold08910 | 1   | 1185 | 1185 | 100   | C_unshiu_00766 | 101874 | 103059 | 1186 | 0.89 | 99.92 |
| scaffold08911 | 1   | 1185 | 1185 | 100   | C_unshiu_02485 | 22286  | 21102  | 1185 | 4.73 | 100   |
| scaffold08916 | 1   | 1184 | 1184 | 100   | C_unshiu_02084 | 27728  | 26545  | 1184 | 3.19 | 100   |
| scaffold08917 | 1   | 1184 | 1184 | 100   | C_unshiu_00445 | 55390  | 54201  | 1190 | 0.57 | 99.41 |
| scaffold08918 | 1   | 1184 | 1184 | 100   | C_unshiu_00492 | 162985 | 164170 | 1186 | 0.61 | 99.83 |
| scaffold08919 | 1   | 1183 | 1183 | 100   | C_unshiu_00935 | 82990  | 81808  | 1183 | 1.05 | 98.99 |
| scaffold08924 | 1   | 1182 | 1182 | 100   | C_unshiu_00225 | 134621 | 133441 | 1181 | 0.38 | 99.92 |
| scaffold08928 | 1   | 1182 | 1182 | 100   | C_unshiu_00420 | 7424   | 8596   | 1173 | 0.54 | 98.99 |
| scaffold08935 | 1   | 1181 | 1181 | 100   | C_unshiu_00095 | 350206 | 349025 | 1182 | 0.25 | 99.92 |
| scaffold08936 | 6   | 1181 | 1176 | 99.58 | C_unshiu_00127 | 349794 | 348619 | 1176 | 0.28 | 100   |
| scaffold08940 | 1   | 1179 | 1179 | 100   | C_unshiu_01437 | 35958  | 34781  | 1178 | 1.74 | 99.66 |
| scaffold08944 | 1   | 1179 | 1179 | 100   | C_unshiu_03033 | 6908   | 8085   | 1178 | 9.82 | 99.58 |
| scaffold08947 | 1   | 1178 | 1178 | 100   | C_unshiu_01393 | 43615  | 44792  | 1178 | 1.66 | 99.92 |
| scaffold08950 | 1   | 1176 | 1176 | 100   | C_unshiu_01777 | 13235  | 12060  | 1176 | 2.38 | 99.91 |
| scaffold08953 | 1   | 1179 | 1179 | 100   | C_unshiu_00418 | 69103  | 67927  | 1177 | 0.54 | 98.47 |
| scaffold08955 | 1   | 1177 | 1177 | 100   | C_unshiu_01069 | 72692  | 73868  | 1177 | 1.19 | 100   |
| scaffold08957 | 1   | 1177 | 1177 | 100   | C_unshiu_01996 | 7403   | 6227   | 1177 | 2.89 | 100   |
| scaffold08959 | 1   | 1176 | 1176 | 100   | C_unshiu_00466 | 179993 | 178808 | 1186 | 0.58 | 98.06 |
| scaffold08960 | 1   | 1176 | 1176 | 100   | C_unshiu_00060 | 432673 | 431501 | 1173 | 0.2  | 99.66 |
| scaffold08961 | 1   | 1176 | 1176 | 100   | C_unshiu_00928 | 34689  | 33514  | 1176 | 1.03 | 100   |
| scaffold08962 | 1   | 1176 | 1176 | 100   | C_unshiu_00888 | 94289  | 95464  | 1176 | 0.99 | 100   |
| scaffold08965 | 1   | 1176 | 1176 | 100   | C_unshiu_00462 | 169181 | 168006 | 1176 | 0.58 | 100   |

|               |     |      |      |       |                |        |        |      |       |       |
|---------------|-----|------|------|-------|----------------|--------|--------|------|-------|-------|
| scaffold08967 | 1   | 1175 | 1175 | 100   | C_unshiu_00673 | 5084   | 6259   | 1176 | 0.78  | 98.98 |
| scaffold08969 | 1   | 1173 | 1173 | 100   | C_unshiu_00905 | 98522  | 97349  | 1174 | 1.01  | 99.83 |
| scaffold08970 | 1   | 1132 | 1132 | 96.18 | C_unshiu_00227 | 240473 | 239342 | 1132 | 0.37  | 100   |
| scaffold08972 | 1   | 1174 | 1174 | 100   | C_unshiu_00310 | 206580 | 205415 | 1166 | 0.45  | 98.72 |
| scaffold08973 | 1   | 1175 | 1175 | 100   | C_unshiu_00031 | 586838 | 585664 | 1175 | 0.17  | 99.83 |
| scaffold08974 | 1   | 1175 | 1175 | 100   | C_unshiu_00157 | 300386 | 301560 | 1175 | 0.31  | 99.83 |
| scaffold08975 | 1   | 1174 | 1174 | 100   | C_unshiu_03074 | 7235   | 6062   | 1174 | 11.37 | 99.15 |
| scaffold08977 | 1   | 1174 | 1174 | 100   | C_unshiu_01311 | 627    | 1792   | 1166 | 1.53  | 99.32 |
| scaffold08979 | 1   | 1173 | 1173 | 100   | C_unshiu_00275 | 264178 | 263000 | 1179 | 0.42  | 99.41 |
| scaffold08980 | 1   | 1173 | 1173 | 100   | C_unshiu_00779 | 18794  | 19965  | 1172 | 0.89  | 99.91 |
| scaffold08981 | 1   | 1173 | 1173 | 100   | C_unshiu_00194 | 33367  | 32195  | 1173 | 0.34  | 100   |
| scaffold08983 | 1   | 1173 | 1173 | 100   | C_unshiu_00654 | 34254  | 33082  | 1173 | 0.76  | 100   |
| scaffold08985 | 163 | 1172 | 1010 | 86.18 | C_unshiu_00269 | 93587  | 92579  | 1009 | 0.36  | 99.41 |
| scaffold08986 | 1   | 1113 | 1113 | 94.97 | C_unshiu_01056 | 13785  | 12673  | 1113 | 1.12  | 99.64 |
| scaffold08987 | 1   | 1172 | 1172 | 100   | C_unshiu_00916 | 109243 | 110414 | 1172 | 1.02  | 100   |
| scaffold08990 | 1   | 1171 | 1171 | 100   | C_unshiu_00268 | 250603 | 251773 | 1171 | 0.41  | 99.74 |
| scaffold08991 | 1   | 1171 | 1171 | 100   | C_unshiu_00737 | 97865  | 99035  | 1171 | 0.85  | 99.91 |
| scaffold08993 | 1   | 1171 | 1171 | 100   | C_unshiu_00015 | 807714 | 806525 | 1190 | 0.14  | 98.15 |
| scaffold09005 | 1   | 1119 | 1119 | 95.72 | C_unshiu_00192 | 267969 | 266848 | 1122 | 0.33  | 99.29 |
| scaffold09009 | 1   | 1168 | 1168 | 100   | C_unshiu_00096 | 164997 | 166169 | 1173 | 0.25  | 99.15 |
| scaffold09012 | 1   | 1166 | 1166 | 100   | C_unshiu_00410 | 34871  | 33700  | 1172 | 0.53  | 98.81 |
| scaffold09013 | 1   | 1166 | 1166 | 100   | C_unshiu_01401 | 65778  | 66945  | 1168 | 1.66  | 99.32 |
| scaffold09014 | 1   | 1166 | 1166 | 100   | C_unshiu_02796 | 11997  | 10833  | 1165 | 6.48  | 99.49 |
| scaffold09017 | 1   | 1165 | 1165 | 100   | C_unshiu_02739 | 596    | 1762   | 1167 | 6.08  | 99.49 |
| scaffold09018 | 1   | 1165 | 1165 | 100   | C_unshiu_02591 | 13205  | 14369  | 1165 | 5.2   | 99.91 |
| scaffold09019 | 1   | 1164 | 1164 | 100   | C_unshiu_00580 | 85587  | 86750  | 1164 | 0.68  | 99.83 |
| scaffold09021 | 1   | 1164 | 1164 | 100   | C_unshiu_00815 | 90198  | 89035  | 1164 | 0.92  | 100   |
| scaffold09025 | 1   | 1163 | 1163 | 100   | C_unshiu_02631 | 16636  | 15471  | 1166 | 5.44  | 99.14 |
| scaffold09027 | 1   | 1163 | 1163 | 100   | C_unshiu_01165 | 82437  | 81276  | 1162 | 1.3   | 98.37 |
| scaffold09028 | 1   | 1163 | 1163 | 100   | C_unshiu_02765 | 14046  | 12884  | 1163 | 6.18  | 100   |
| scaffold09032 | 1   | 1162 | 1162 | 100   | C_unshiu_01055 | 20636  | 19475  | 1162 | 1.17  | 100   |
| scaffold09033 | 1   | 1162 | 1162 | 100   | C_unshiu_00538 | 106555 | 107706 | 1152 | 0.63  | 98.97 |
| scaffold09034 | 5   | 1163 | 1159 | 99.66 | C_unshiu_01894 | 22985  | 21827  | 1159 | 2.58  | 99.83 |
| scaffold09039 | 1   | 1161 | 1161 | 100   | C_unshiu_00227 | 146792 | 145632 | 1161 | 0.37  | 99.74 |
| scaffold09040 | 1   | 1161 | 1161 | 100   | C_unshiu_00709 | 57518  | 58678  | 1161 | 0.81  | 99.91 |
| scaffold09046 | 1   | 1160 | 1160 | 100   | C_unshiu_00451 | 115419 | 116578 | 1160 | 0.56  | 100   |
| scaffold09047 | 1   | 1160 | 1160 | 100   | C_unshiu_01575 | 2053   | 3215   | 1163 | 1.98  | 99.48 |
| scaffold09048 | 1   | 1160 | 1160 | 100   | C_unshiu_00157 | 156050 | 157209 | 1160 | 0.31  | 100   |
| scaffold09051 | 1   | 1159 | 1159 | 100   | C_unshiu_00963 | 97784  | 96623  | 1162 | 1.05  | 98.36 |
| scaffold09052 | 1   | 1159 | 1159 | 100   | C_unshiu_00625 | 87272  | 86114  | 1159 | 0.72  | 100   |
| scaffold09054 | 1   | 1158 | 1158 | 100   | C_unshiu_00816 | 43806  | 44963  | 1158 | 0.91  | 100   |
| scaffold09056 | 1   | 1158 | 1158 | 100   | C_unshiu_02811 | 417    | 1574   | 1158 | 6.56  | 100   |
| scaffold09057 | 1   | 1160 | 1160 | 100   | C_unshiu_00543 | 65266  | 64105  | 1162 | 0.65  | 99.31 |
| scaffold09062 | 1   | 1156 | 1156 | 100   | C_unshiu_01453 | 32414  | 33569  | 1156 | 1.74  | 100   |
| scaffold09064 | 1   | 1156 | 1156 | 100   | C_unshiu_02139 | 11220  | 12365  | 1146 | 3.24  | 98.88 |
| scaffold09066 | 13  | 1155 | 1143 | 98.96 | C_unshiu_00165 | 187161 | 188289 | 1129 | 0.31  | 98.25 |
| scaffold09067 | 1   | 1150 | 1150 | 99.48 | C_unshiu_00293 | 131566 | 132708 | 1143 | 0.42  | 98.44 |
| scaffold09068 | 1   | 1157 | 1157 | 100   | C_unshiu_01681 | 22968  | 24124  | 1157 | 2.16  | 100   |
| scaffold09070 | 1   | 1156 | 1156 | 100   | C_unshiu_00352 | 29358  | 30510  | 1153 | 0.48  | 98.79 |
| scaffold09074 | 1   | 1155 | 1155 | 100   | C_unshiu_00218 | 270092 | 268938 | 1155 | 0.36  | 99.48 |
| scaffold09080 | 1   | 1155 | 1155 | 100   | C_unshiu_01516 | 48250  | 49404  | 1155 | 1.85  | 99.05 |
| scaffold09084 | 5   | 1154 | 1150 | 99.65 | C_unshiu_00995 | 29813  | 28661  | 1153 | 1.08  | 99.31 |
| scaffold09088 | 1   | 1154 | 1154 | 100   | C_unshiu_00341 | 148325 | 149479 | 1155 | 0.46  | 99.31 |
| scaffold09091 | 1   | 1153 | 1153 | 100   | C_unshiu_00221 | 163439 | 162277 | 1163 | 0.37  | 99.14 |
| scaffold09092 | 1   | 1153 | 1153 | 100   | C_unshiu_00101 | 194236 | 193084 | 1153 | 0.25  | 99.65 |
| scaffold09097 | 1   | 1152 | 1152 | 100   | C_unshiu_00011 | 318968 | 320122 | 1155 | 0.12  | 99.31 |
| scaffold09098 | 1   | 1152 | 1152 | 100   | C_unshiu_02247 | 23349  | 24500  | 1152 | 3.62  | 100   |
| scaffold09103 | 1   | 1151 | 1151 | 100   | C_unshiu_00787 | 110292 | 111442 | 1151 | 0.88  | 100   |
| scaffold09104 | 1   | 1151 | 1151 | 100   | C_unshiu_00252 | 196503 | 195351 | 1153 | 0.39  | 99.22 |
| scaffold09105 | 1   | 1150 | 1150 | 100   | C_unshiu_00304 | 224501 | 225662 | 1162 | 0.44  | 98.54 |
| scaffold09106 | 1   | 1150 | 1150 | 100   | C_unshiu_00269 | 68827  | 69973  | 1147 | 0.41  | 98.09 |
| scaffold09107 | 1   | 1150 | 1150 | 100   | C_unshiu_01041 | 47921  | 46770  | 1152 | 1.13  | 99.83 |
| scaffold09108 | 1   | 1150 | 1150 | 100   | C_unshiu_01546 | 6154   | 5005   | 1150 | 1.89  | 100   |
| scaffold09110 | 1   | 1149 | 1149 | 100   | C_unshiu_00859 | 120907 | 119759 | 1149 | 0.94  | 99.74 |
| scaffold09111 | 1   | 1149 | 1149 | 100   | C_unshiu_01102 | 68418  | 67270  | 1149 | 1.2   | 99.91 |
| scaffold09113 | 1   | 1149 | 1149 | 100   | C_unshiu_00309 | 249360 | 248212 | 1149 | 0.44  | 100   |
| scaffold09116 | 1   | 1148 | 1148 | 100   | C_unshiu_01290 | 55512  | 54365  | 1148 | 1.47  | 100   |
| scaffold09117 | 1   | 1148 | 1148 | 100   | C_unshiu_00424 | 200525 | 199377 | 1149 | 0.53  | 99.74 |
| scaffold09121 | 1   | 1145 | 1145 | 100   | C_unshiu_02130 | 17118  | 15980  | 1139 | 3.2   | 98.95 |
| scaffold09123 | 1   | 1146 | 1146 | 100   | C_unshiu_01641 | 21922  | 23067  | 1146 | 2.07  | 100   |
| scaffold09134 | 1   | 1144 | 1144 | 100   | C_unshiu_00082 | 464654 | 465797 | 1144 | 0.24  | 100   |
| scaffold09136 | 1   | 1143 | 1143 | 100   | C_unshiu_00589 | 159289 | 160443 | 1155 | 0.68  | 98.27 |
| scaffold09140 | 1   | 1143 | 1143 | 100   | C_unshiu_01887 | 32550  | 31408  | 1143 | 2.53  | 99.74 |
| scaffold09142 | 1   | 1143 | 1143 | 100   | C_unshiu_01033 | 13699  | 12557  | 1143 | 1.11  | 99.74 |
| scaffold09143 | 1   | 1142 | 1142 | 100   | C_unshiu_00248 | 230271 | 229129 | 1143 | 0.39  | 99.48 |
| scaffold09153 | 1   | 1142 | 1142 | 100   | C_unshiu_01099 | 36982  | 35840  | 1143 | 1.19  | 99.91 |
| scaffold09157 | 1   | 1141 | 1141 | 100   | C_unshiu_00490 | 145011 | 146154 | 1144 | 0.58  | 99.48 |
| scaffold09161 | 1   | 1140 | 1140 | 100   | C_unshiu_00213 | 229867 | 228728 | 1140 | 0.35  | 100   |
| scaffold09163 | 1   | 1140 | 1140 | 100   | C_unshiu_00297 | 125083 | 123942 | 1142 | 0.43  | 98.17 |

|               |    |      |      |       |                |         |         |      |       |       |
|---------------|----|------|------|-------|----------------|---------|---------|------|-------|-------|
| scaffold09164 | 1  | 1137 | 1137 | 99.56 | C_unshiu_00115 | 49254   | 50392   | 1139 | 0.26  | 98.24 |
| scaffold09165 | 1  | 1140 | 1140 | 100   | C_unshiu_00333 | 120254  | 119115  | 1140 | 0.45  | 100   |
| scaffold09172 | 1  | 1139 | 1139 | 100   | C_unshiu_01796 | 10852   | 9714    | 1139 | 2.35  | 100   |
| scaffold09176 | 1  | 1138 | 1138 | 100   | C_unshiu_01060 | 14367   | 13231   | 1137 | 1.15  | 99.91 |
| scaffold09177 | 1  | 1138 | 1138 | 100   | C_unshiu_01898 | 20734   | 21867   | 1134 | 2.53  | 99.12 |
| scaffold09180 | 1  | 1137 | 1137 | 100   | C_unshiu_00141 | 152913  | 154049  | 1137 | 0.28  | 98.86 |
| scaffold09181 | 1  | 1137 | 1137 | 100   | C_unshiu_01498 | 46203   | 45067   | 1137 | 1.79  | 99.38 |
| scaffold09187 | 1  | 1137 | 1137 | 100   | C_unshiu_00453 | 137859  | 136723  | 1137 | 0.55  | 99.3  |
| scaffold09189 | 35 | 1137 | 1103 | 97.01 | C_unshiu_01776 | 31037   | 29939   | 1099 | 2.22  | 98.73 |
| scaffold09190 | 1  | 1136 | 1136 | 100   | C_unshiu_00656 | 101489  | 102624  | 1136 | 0.73  | 100   |
| scaffold09198 | 1  | 1135 | 1135 | 100   | C_unshiu_01829 | 32645   | 33779   | 1135 | 2.39  | 100   |
| scaffold09202 | 1  | 1134 | 1134 | 100   | C_unshiu_00490 | 75474   | 74339   | 1136 | 0.58  | 99.3  |
| scaffold09203 | 1  | 1134 | 1134 | 100   | C_unshiu_00874 | 90359   | 91493   | 1135 | 0.95  | 99.65 |
| scaffold09209 | 1  | 1133 | 1133 | 100   | C_unshiu_00254 | 103734  | 102601  | 1134 | 0.39  | 99.82 |
| scaffold09211 | 1  | 1121 | 1121 | 100   | C_unshiu_00067 | 15585   | 16716   | 1132 | 0.21  | 99.03 |
| scaffold09212 | 1  | 1131 | 1131 | 100   | C_unshiu_00216 | 11503   | 10377   | 1127 | 0.35  | 98.85 |
| scaffold09213 | 1  | 1132 | 1132 | 100   | C_unshiu_01555 | 51660   | 50529   | 1132 | 1.88  | 98.41 |
| scaffold09216 | 1  | 1039 | 1039 | 91.78 | C_unshiu_00065 | 335643  | 336683  | 1041 | 0.19  | 98.85 |
| scaffold09219 | 1  | 1131 | 1131 | 100   | C_unshiu_00668 | 136805  | 137937  | 1133 | 0.74  | 98.06 |
| scaffold09220 | 1  | 1101 | 1101 | 97.35 | C_unshiu_00145 | 239151  | 238051  | 1101 | 0.28  | 100   |
| scaffold09221 | 1  | 1131 | 1131 | 100   | C_unshiu_00577 | 67249   | 66119   | 1131 | 0.66  | 100   |
| scaffold09222 | 1  | 1131 | 1131 | 100   | C_unshiu_00346 | 237904  | 239034  | 1131 | 0.46  | 100   |
| scaffold09223 | 1  | 1131 | 1131 | 100   | C_unshiu_01268 | 4432    | 3302    | 1131 | 1.42  | 100   |
| scaffold09224 | 1  | 1131 | 1131 | 100   | C_unshiu_00409 | 2909    | 4039    | 1131 | 0.51  | 99.73 |
| scaffold09226 | 1  | 1128 | 1128 | 99.73 | C_unshiu_00059 | 558089  | 556962  | 1128 | 0.19  | 99.56 |
| scaffold09228 | 1  | 1131 | 1131 | 100   | C_unshiu_01393 | 59513   | 58382   | 1132 | 1.6   | 99.91 |
| scaffold09233 | 1  | 1130 | 1130 | 100   | C_unshiu_00422 | 91843   | 90714   | 1130 | 0.52  | 99.82 |
| scaffold09236 | 1  | 1130 | 1130 | 100   | C_unshiu_01548 | 7228    | 6099    | 1130 | 1.86  | 100   |
| scaffold09244 | 1  | 1129 | 1129 | 100   | C_unshiu_00123 | 220396  | 219265  | 1132 | 0.27  | 99.29 |
| scaffold09246 | 4  | 1128 | 1125 | 99.73 | C_unshiu_02337 | 14701   | 15825   | 1125 | 3.91  | 99.2  |
| scaffold09249 | 1  | 1128 | 1128 | 100   | C_unshiu_02298 | 3286    | 4413    | 1128 | 3.77  | 99.82 |
| scaffold09254 | 1  | 1127 | 1127 | 100   | C_unshiu_00005 | 1114622 | 1113496 | 1127 | 0.1   | 100   |
| scaffold09256 | 1  | 1127 | 1127 | 100   | C_unshiu_01821 | 11221   | 12351   | 1131 | 2.37  | 99.12 |
| scaffold09257 | 1  | 1127 | 1127 | 100   | C_unshiu_01526 | 1997    | 872     | 1126 | 1.82  | 98.49 |
| scaffold09264 | 1  | 1126 | 1126 | 100   | C_unshiu_00313 | 94866   | 95988   | 1123 | 0.43  | 98.76 |
| scaffold09270 | 1  | 1125 | 1125 | 100   | C_unshiu_01461 | 56193   | 55069   | 1125 | 1.71  | 99.38 |
| scaffold09271 | 1  | 1125 | 1125 | 100   | C_unshiu_00994 | 66722   | 65598   | 1125 | 1.05  | 99.82 |
| scaffold09274 | 39 | 1124 | 1086 | 96.62 | C_unshiu_00624 | 117277  | 118362  | 1086 | 0.67  | 99.63 |
| scaffold09275 | 1  | 1124 | 1124 | 100   | C_unshiu_01315 | 34358   | 35481   | 1124 | 1.48  | 99.38 |
| scaffold09278 | 1  | 1124 | 1124 | 100   | C_unshiu_00887 | 105453  | 104330  | 1124 | 0.95  | 99.64 |
| scaffold09281 | 1  | 1123 | 1123 | 100   | C_unshiu_02382 | 4891    | 6013    | 1123 | 4.06  | 100   |
| scaffold09285 | 1  | 1123 | 1123 | 100   | C_unshiu_03113 | 7367    | 8489    | 1123 | 12.89 | 100   |
| scaffold09286 | 1  | 1123 | 1123 | 100   | C_unshiu_00176 | 296185  | 297308  | 1124 | 0.31  | 99.91 |
| scaffold09287 | 1  | 1123 | 1123 | 100   | C_unshiu_01480 | 13766   | 12642   | 1125 | 1.75  | 98.58 |
| scaffold09289 | 1  | 1123 | 1123 | 100   | C_unshiu_00707 | 63845   | 64967   | 1123 | 0.79  | 98.58 |
| scaffold09291 | 1  | 1123 | 1123 | 100   | C_unshiu_01291 | 45227   | 44103   | 1125 | 1.44  | 99.73 |
| scaffold09294 | 1  | 1122 | 1122 | 100   | C_unshiu_00769 | 21042   | 19921   | 1122 | 0.84  | 100   |
| scaffold09295 | 1  | 1122 | 1122 | 100   | C_unshiu_01090 | 75251   | 76372   | 1122 | 1.15  | 99.82 |
| scaffold09299 | 1  | 1122 | 1122 | 100   | C_unshiu_00087 | 185722  | 184601  | 1122 | 0.24  | 99.82 |
| scaffold09304 | 1  | 1121 | 1121 | 100   | C_unshiu_00856 | 93095   | 94215   | 1121 | 0.92  | 100   |
| scaffold09305 | 1  | 1121 | 1121 | 100   | C_unshiu_00567 | 12965   | 11845   | 1121 | 0.64  | 100   |
| scaffold09309 | 38 | 1120 | 1083 | 96.7  | C_unshiu_01336 | 48545   | 49627   | 1083 | 1.45  | 99.91 |
| scaffold09310 | 1  | 1120 | 1120 | 100   | C_unshiu_00275 | 53675   | 52556   | 1120 | 0.4   | 100   |
| scaffold09311 | 1  | 1115 | 1115 | 99.55 | C_unshiu_02263 | 2942    | 4055    | 1114 | 3.58  | 99.91 |
| scaffold09312 | 1  | 1120 | 1120 | 100   | C_unshiu_00481 | 12055   | 10935   | 1121 | 0.57  | 99.73 |
| scaffold09315 | 1  | 1121 | 1121 | 100   | C_unshiu_00177 | 11797   | 12917   | 1121 | 0.31  | 100   |
| scaffold09316 | 1  | 1119 | 1119 | 100   | C_unshiu_00670 | 6836    | 5720    | 1117 | 0.73  | 99.64 |
| scaffold09318 | 1  | 1119 | 1119 | 100   | C_unshiu_00017 | 5082    | 6201    | 1120 | 0.13  | 99.91 |
| scaffold09322 | 1  | 1004 | 1004 | 89.72 | C_unshiu_01863 | 10350   | 9341    | 1010 | 2.2   | 99.11 |
| scaffold09323 | 1  | 1119 | 1119 | 100   | C_unshiu_00330 | 48766   | 49884   | 1119 | 0.44  | 99.91 |
| scaffold09326 | 1  | 1118 | 1118 | 100   | C_unshiu_00164 | 355565  | 356682  | 1118 | 0.3   | 100   |
| scaffold09328 | 1  | 1118 | 1118 | 100   | C_unshiu_01065 | 32937   | 34054   | 1118 | 1.13  | 100   |
| scaffold09330 | 1  | 1118 | 1118 | 100   | C_unshiu_00414 | 198250  | 197133  | 1118 | 0.51  | 100   |
| scaffold09331 | 1  | 1118 | 1118 | 100   | C_unshiu_00278 | 152738  | 153859  | 1122 | 0.4   | 99.47 |
| scaffold09332 | 1  | 1118 | 1118 | 100   | C_unshiu_00174 | 100362  | 99245   | 1118 | 0.31  | 99.55 |
| scaffold09335 | 1  | 1119 | 1119 | 100   | C_unshiu_00645 | 72420   | 71307   | 1114 | 0.7   | 98.75 |
| scaffold09337 | 1  | 1117 | 1117 | 100   | C_unshiu_02335 | 9944    | 11062   | 1119 | 3.89  | 99.46 |
| scaffold09340 | 1  | 1117 | 1117 | 100   | C_unshiu_00901 | 70212   | 71328   | 1117 | 0.95  | 99.91 |
| scaffold09343 | 1  | 1117 | 1117 | 100   | C_unshiu_00029 | 523407  | 524523  | 1117 | 0.16  | 100   |
| scaffold09344 | 1  | 1117 | 1117 | 100   | C_unshiu_00555 | 131887  | 133001  | 1115 | 0.63  | 99.55 |
| scaffold09346 | 1  | 1116 | 1116 | 100   | C_unshiu_01570 | 36440   | 35321   | 1120 | 1.89  | 99.64 |
| scaffold09347 | 1  | 1116 | 1116 | 100   | C_unshiu_00542 | 35743   | 34628   | 1116 | 0.62  | 100   |
| scaffold09349 | 1  | 1116 | 1116 | 100   | C_unshiu_00213 | 163690  | 164805  | 1116 | 0.34  | 100   |
| scaffold09354 | 1  | 1115 | 1115 | 100   | C_unshiu_00363 | 198867  | 197748  | 1120 | 0.48  | 99.29 |
| scaffold09357 | 1  | 1115 | 1115 | 100   | C_unshiu_00451 | 151635  | 150520  | 1116 | 0.54  | 99.91 |
| scaffold09358 | 1  | 1115 | 1115 | 100   | C_unshiu_00633 | 102344  | 103458  | 1115 | 0.7   | 99.01 |
| scaffold09359 | 1  | 1115 | 1115 | 100   | C_unshiu_00088 | 214510  | 213397  | 1114 | 0.24  | 98.48 |
| scaffold09360 | 1  | 1115 | 1115 | 100   | C_unshiu_01649 | 37862   | 36747   | 1116 | 2.02  | 99.55 |
| scaffold09367 | 1  | 1114 | 1114 | 100   | C_unshiu_01457 | 19882   | 20995   | 1114 | 1.69  | 99.64 |

|               |    |      |      |       |                |        |        |      |      |       |
|---------------|----|------|------|-------|----------------|--------|--------|------|------|-------|
| scaffold09372 | 1  | 1113 | 1113 | 100   | C_unshiu_00088 | 67219  | 68346  | 1128 | 0.24 | 98.05 |
| scaffold09373 | 1  | 1112 | 1112 | 100   | C_unshiu_01175 | 36611  | 37722  | 1112 | 1.26 | 100   |
| scaffold09375 | 1  | 1123 | 1123 | 100   | C_unshiu_01060 | 42686  | 43807  | 1122 | 1.13 | 98.58 |
| scaffold09378 | 1  | 1112 | 1112 | 100   | C_unshiu_00633 | 155653 | 156764 | 1112 | 0.69 | 99.64 |
| scaffold09379 | 1  | 1112 | 1112 | 100   | C_unshiu_00903 | 40678  | 41789  | 1112 | 0.95 | 100   |
| scaffold09382 | 1  | 1111 | 1111 | 100   | C_unshiu_00656 | 124300 | 123188 | 1113 | 0.72 | 99.37 |
| scaffold09383 | 1  | 1111 | 1111 | 100   | C_unshiu_02614 | 20134  | 21244  | 1111 | 5.1  | 99.55 |
| scaffold09384 | 1  | 1111 | 1111 | 100   | C_unshiu_02203 | 8593   | 7483   | 1111 | 3.36 | 99.91 |
| scaffold09387 | 1  | 1111 | 1111 | 100   | C_unshiu_00226 | 47452  | 46341  | 1112 | 0.36 | 98.38 |
| scaffold09392 | 1  | 1110 | 1110 | 100   | C_unshiu_00370 | 119344 | 118236 | 1109 | 0.48 | 98.74 |
| scaffold09393 | 1  | 1110 | 1110 | 100   | C_unshiu_01162 | 11099  | 12208  | 1110 | 1.24 | 100   |
| scaffold09396 | 1  | 1109 | 1109 | 100   | C_unshiu_00279 | 123787 | 124894 | 1108 | 0.4  | 99.82 |
| scaffold09397 | 1  | 1109 | 1109 | 100   | C_unshiu_01843 | 37744  | 36636  | 1109 | 2.37 | 99.73 |
| scaffold09399 | 1  | 1109 | 1109 | 100   | C_unshiu_02085 | 21465  | 20357  | 1109 | 2.99 | 99.46 |
| scaffold09400 | 1  | 1109 | 1109 | 100   | C_unshiu_00143 | 6929   | 5821   | 1109 | 0.28 | 100   |
| scaffold09401 | 1  | 1109 | 1109 | 100   | C_unshiu_00191 | 332508 | 333616 | 1109 | 0.32 | 98.65 |
| scaffold09402 | 5  | 1069 | 1065 | 99.63 | C_unshiu_00008 | 680529 | 679462 | 1068 | 0.1  | 99.25 |
| scaffold09405 | 1  | 1108 | 1108 | 100   | C_unshiu_00722 | 9690   | 10797  | 1108 | 0.78 | 100   |
| scaffold09406 | 1  | 1108 | 1108 | 100   | C_unshiu_02612 | 15524  | 14416  | 1109 | 5.09 | 99.28 |
| scaffold09408 | 1  | 1106 | 1106 | 100   | C_unshiu_01208 | 57167  | 58272  | 1106 | 1.31 | 100   |
| scaffold09412 | 1  | 1108 | 1108 | 100   | C_unshiu_01352 | 25857  | 26964  | 1108 | 1.5  | 99.64 |
| scaffold09414 | 1  | 1107 | 1107 | 100   | C_unshiu_01657 | 50585  | 49479  | 1107 | 2.02 | 99.64 |
| scaffold09417 | 1  | 1107 | 1107 | 100   | C_unshiu_00329 | 131633 | 130527 | 1107 | 0.44 | 100   |
| scaffold09418 | 1  | 1107 | 1107 | 100   | C_unshiu_00149 | 31298  | 32404  | 1107 | 0.29 | 100   |
| scaffold09421 | 1  | 1107 | 1107 | 100   | C_unshiu_00410 | 50766  | 49660  | 1107 | 0.5  | 100   |
| scaffold09422 | 1  | 1107 | 1107 | 100   | C_unshiu_00506 | 61699  | 62805  | 1107 | 0.58 | 99.91 |
| scaffold09425 | 1  | 1106 | 1106 | 100   | C_unshiu_00100 | 55616  | 56721  | 1106 | 0.24 | 100   |
| scaffold09431 | 1  | 1106 | 1106 | 100   | C_unshiu_00152 | 158153 | 159258 | 1106 | 0.29 | 100   |
| scaffold09433 | 2  | 1105 | 1104 | 99.91 | C_unshiu_01187 | 64556  | 63453  | 1104 | 1.27 | 100   |
| scaffold09435 | 1  | 1105 | 1105 | 100   | C_unshiu_00888 | 117066 | 115961 | 1106 | 0.93 | 99.73 |
| scaffold09436 | 1  | 1105 | 1105 | 100   | C_unshiu_01483 | 31379  | 32483  | 1105 | 1.72 | 99.1  |
| scaffold09437 | 1  | 1105 | 1105 | 100   | C_unshiu_00592 | 70576  | 71681  | 1106 | 0.65 | 99.91 |
| scaffold09440 | 1  | 1105 | 1105 | 100   | C_unshiu_00223 | 90295  | 91399  | 1105 | 0.35 | 100   |
| scaffold09445 | 1  | 1104 | 1104 | 100   | C_unshiu_00508 | 44216  | 43113  | 1104 | 0.58 | 100   |
| scaffold09446 | 1  | 1104 | 1104 | 100   | C_unshiu_00137 | 378286 | 379391 | 1106 | 0.27 | 99.73 |
| scaffold09447 | 1  | 1104 | 1104 | 100   | C_unshiu_00080 | 2687   | 1587   | 1101 | 0.22 | 99.37 |
| scaffold09452 | 1  | 1103 | 1103 | 100   | C_unshiu_01729 | 1334   | 232    | 1103 | 2.14 | 99.82 |
| scaffold09453 | 1  | 1103 | 1103 | 100   | C_unshiu_00655 | 36369  | 35267  | 1103 | 0.71 | 100   |
| scaffold09455 | 17 | 1032 | 1016 | 92.11 | C_unshiu_00259 | 263184 | 264203 | 1020 | 0.36 | 99.02 |
| scaffold09456 | 1  | 1103 | 1103 | 100   | C_unshiu_02126 | 14854  | 13752  | 1103 | 3.08 | 100   |
| scaffold09459 | 1  | 1103 | 1103 | 100   | C_unshiu_00467 | 164367 | 163276 | 1092 | 0.54 | 98.37 |
| scaffold09460 | 1  | 1101 | 1101 | 100   | C_unshiu_00514 | 97622  | 96525  | 1098 | 0.59 | 99.27 |
| scaffold09462 | 1  | 1102 | 1102 | 100   | C_unshiu_00712 | 1417   | 2518   | 1102 | 0.77 | 99.64 |
| scaffold09463 | 1  | 1102 | 1102 | 100   | C_unshiu_00434 | 130970 | 132071 | 1102 | 0.52 | 100   |
| scaffold09467 | 1  | 1102 | 1102 | 100   | C_unshiu_01067 | 88888  | 89991  | 1104 | 1.12 | 99.82 |
| scaffold09470 | 1  | 1101 | 1101 | 100   | C_unshiu_00678 | 131588 | 132688 | 1101 | 0.74 | 99.73 |
| scaffold09471 | 1  | 1101 | 1101 | 100   | C_unshiu_01069 | 75054  | 73954  | 1101 | 1.11 | 100   |
| scaffold09472 | 1  | 1101 | 1101 | 100   | C_unshiu_00283 | 272626 | 271526 | 1101 | 0.4  | 99.09 |
| scaffold09474 | 1  | 1101 | 1101 | 100   | C_unshiu_01087 | 29929  | 31029  | 1101 | 1.13 | 99.91 |
| scaffold09480 | 1  | 1100 | 1100 | 100   | C_unshiu_00106 | 77932  | 79031  | 1100 | 0.24 | 100   |
| scaffold09483 | 1  | 1099 | 1099 | 100   | C_unshiu_01296 | 41946  | 40848  | 1099 | 1.42 | 100   |
| scaffold09486 | 1  | 1099 | 1099 | 100   | C_unshiu_00331 | 215759 | 214661 | 1099 | 0.44 | 100   |
| scaffold09488 | 1  | 1096 | 1096 | 99.82 | C_unshiu_02286 | 7478   | 8582   | 1105 | 3.66 | 99.19 |
| scaffold09490 | 1  | 1098 | 1098 | 100   | C_unshiu_00080 | 239534 | 240632 | 1099 | 0.22 | 99.64 |
| scaffold09494 | 1  | 1098 | 1098 | 100   | C_unshiu_00391 | 59731  | 60828  | 1098 | 0.49 | 100   |
| scaffold09496 | 1  | 1098 | 1098 | 100   | C_unshiu_02159 | 33408  | 32311  | 1098 | 3.17 | 100   |
| scaffold09499 | 1  | 1098 | 1098 | 100   | C_unshiu_01679 | 29578  | 30675  | 1098 | 2.05 | 100   |
| scaffold09500 | 90 | 1098 | 1009 | 91.89 | C_unshiu_00881 | 70081  | 69073  | 1009 | 0.85 | 99.9  |
| scaffold09501 | 1  | 1097 | 1097 | 100   | C_unshiu_00848 | 57713  | 56619  | 1095 | 0.89 | 99.54 |
| scaffold09503 | 1  | 1096 | 1096 | 100   | C_unshiu_00587 | 13832  | 14928  | 1097 | 0.64 | 99.64 |
| scaffold09506 | 31 | 1097 | 1067 | 97.27 | C_unshiu_00591 | 145337 | 144274 | 1064 | 0.63 | 98.31 |
| scaffold09513 | 1  | 1096 | 1096 | 100   | C_unshiu_00127 | 3569   | 2473   | 1097 | 0.26 | 98.72 |
| scaffold09515 | 1  | 1096 | 1096 | 100   | C_unshiu_01077 | 40168  | 41263  | 1096 | 1.12 | 100   |
| scaffold09516 | 1  | 1096 | 1096 | 100   | C_unshiu_01203 | 3878   | 2784   | 1095 | 1.28 | 99.73 |
| scaffold09517 | 1  | 1096 | 1096 | 100   | C_unshiu_00413 | 59827  | 58732  | 1096 | 0.5  | 100   |
| scaffold09521 | 1  | 1094 | 1094 | 100   | C_unshiu_01123 | 49831  | 50923  | 1093 | 1.17 | 99.18 |
| scaffold09522 | 1  | 1095 | 1095 | 100   | C_unshiu_01441 | 39181  | 40275  | 1095 | 1.63 | 100   |
| scaffold09527 | 1  | 1095 | 1095 | 100   | C_unshiu_00682 | 132075 | 133169 | 1095 | 0.74 | 100   |
| scaffold09529 | 1  | 1095 | 1095 | 100   | C_unshiu_00249 | 228741 | 227647 | 1095 | 0.37 | 99.63 |
| scaffold09530 | 1  | 1095 | 1095 | 100   | C_unshiu_00778 | 37181  | 36085  | 1097 | 0.83 | 99.64 |
| scaffold09531 | 1  | 1095 | 1095 | 100   | C_unshiu_02203 | 1264   | 170    | 1095 | 3.31 | 100   |
| scaffold09532 | 1  | 1094 | 1094 | 100   | C_unshiu_00629 | 121529 | 120438 | 1092 | 0.68 | 99.27 |
| scaffold09535 | 1  | 1094 | 1094 | 100   | C_unshiu_01680 | 20194  | 21287  | 1094 | 2.04 | 98.9  |
| scaffold09536 | 1  | 1094 | 1094 | 100   | C_unshiu_00146 | 185647 | 184553 | 1095 | 0.28 | 99.45 |
| scaffold09537 | 1  | 1094 | 1094 | 100   | C_unshiu_00387 | 32569  | 31476  | 1094 | 0.48 | 100   |
| scaffold09539 | 1  | 1094 | 1094 | 100   | C_unshiu_00731 | 17766  | 18860  | 1095 | 0.79 | 99.63 |
| scaffold09545 | 1  | 1093 | 1093 | 100   | C_unshiu_01453 | 25592  | 26684  | 1093 | 1.65 | 100   |
| scaffold09549 | 1  | 1093 | 1093 | 100   | C_unshiu_01220 | 24722  | 23630  | 1093 | 1.31 | 99.54 |
| scaffold09551 | 1  | 1093 | 1093 | 100   | C_unshiu_00157 | 157332 | 158424 | 1093 | 0.29 | 100   |

|               |   |      |      |       |                |        |        |      |      |       |
|---------------|---|------|------|-------|----------------|--------|--------|------|------|-------|
| scaffold09554 | 1 | 1092 | 1092 | 100   | C_unshiu_00891 | 97133  | 96054  | 1080 | 0.91 | 98.44 |
| scaffold09555 | 1 | 1092 | 1092 | 100   | C_unshiu_00743 | 136101 | 135009 | 1093 | 0.8  | 99.18 |
| scaffold09559 | 1 | 1092 | 1092 | 100   | C_unshiu_00999 | 87985  | 89076  | 1092 | 1.03 | 100   |
| scaffold09561 | 1 | 1092 | 1092 | 100   | C_unshiu_00635 | 1821   | 731    | 1091 | 0.68 | 99.45 |
| scaffold09563 | 1 | 1092 | 1092 | 100   | C_unshiu_00959 | 107089 | 105996 | 1094 | 0.99 | 99.36 |
| scaffold09564 | 1 | 1092 | 1092 | 100   | C_unshiu_00898 | 9629   | 8538   | 1092 | 0.93 | 100   |
| scaffold09567 | 1 | 1091 | 1091 | 100   | C_unshiu_01089 | 43999  | 42907  | 1093 | 1.12 | 99.82 |
| scaffold09569 | 1 | 1091 | 1091 | 100   | C_unshiu_01254 | 41287  | 42377  | 1091 | 1.35 | 99.91 |
| scaffold09572 | 1 | 1091 | 1091 | 100   | C_unshiu_01438 | 50582  | 49492  | 1091 | 1.61 | 100   |
| scaffold09575 | 1 | 1089 | 1089 | 99.82 | C_unshiu_00945 | 14064  | 15152  | 1089 | 0.97 | 100   |
| scaffold09576 | 1 | 1091 | 1091 | 100   | C_unshiu_01349 | 40177  | 41267  | 1091 | 1.47 | 100   |
| scaffold09579 | 1 | 1091 | 1091 | 100   | C_unshiu_00698 | 58119  | 59208  | 1090 | 0.76 | 99.45 |
| scaffold09580 | 1 | 1090 | 1090 | 100   | C_unshiu_00104 | 346052 | 347140 | 1089 | 0.24 | 99.91 |
| scaffold09581 | 1 | 1090 | 1090 | 100   | C_unshiu_01890 | 8748   | 9839   | 1092 | 2.42 | 99.73 |
| scaffold09588 | 1 | 1089 | 1089 | 100   | C_unshiu_00183 | 70255  | 71346  | 1092 | 0.31 | 99.36 |
| scaffold09590 | 1 | 1089 | 1089 | 100   | C_unshiu_02125 | 11536  | 10448  | 1089 | 3.04 | 100   |
| scaffold09591 | 1 | 1089 | 1089 | 100   | C_unshiu_02684 | 2458   | 3546   | 1089 | 5.38 | 100   |
| scaffold09593 | 1 | 1089 | 1089 | 100   | C_unshiu_01067 | 37709  | 36621  | 1089 | 1.1  | 100   |
| scaffold09596 | 1 | 1088 | 1088 | 100   | C_unshiu_00251 | 37588  | 38677  | 1090 | 0.37 | 98.62 |
| scaffold09598 | 1 | 1088 | 1088 | 100   | C_unshiu_02797 | 6283   | 5196   | 1088 | 6.07 | 99.82 |
| scaffold09600 | 1 | 1088 | 1088 | 100   | C_unshiu_00787 | 80233  | 79146  | 1088 | 0.83 | 100   |
| scaffold09605 | 1 | 1088 | 1088 | 100   | C_unshiu_00467 | 129387 | 128297 | 1091 | 0.54 | 99.73 |
| scaffold09611 | 1 | 1087 | 1087 | 100   | C_unshiu_00668 | 135575 | 134489 | 1087 | 0.71 | 98.8  |
| scaffold09616 | 1 | 1086 | 1086 | 100   | C_unshiu_00301 | 126585 | 127674 | 1090 | 0.41 | 99.63 |
| scaffold09617 | 1 | 1086 | 1086 | 100   | C_unshiu_00457 | 89422  | 90507  | 1086 | 0.53 | 99.45 |
| scaffold09618 | 1 | 1086 | 1086 | 100   | C_unshiu_00132 | 90692  | 89607  | 1086 | 0.26 | 99.82 |
| scaffold09619 | 1 | 1097 | 1097 | 100   | C_unshiu_01416 | 39551  | 38452  | 1100 | 1.58 | 99.36 |
| scaffold09620 | 1 | 1086 | 1086 | 100   | C_unshiu_01454 | 5304   | 4219   | 1086 | 1.64 | 100   |
| scaffold09623 | 1 | 1085 | 1085 | 100   | C_unshiu_00856 | 47592  | 46508  | 1085 | 0.89 | 99.82 |
| scaffold09624 | 1 | 1085 | 1085 | 100   | C_unshiu_02773 | 2186   | 1102   | 1085 | 5.86 | 100   |
| scaffold09625 | 1 | 1085 | 1085 | 100   | C_unshiu_00718 | 43169  | 42085  | 1085 | 0.77 | 99.36 |
| scaffold09626 | 1 | 1085 | 1085 | 100   | C_unshiu_02303 | 2086   | 3170   | 1085 | 3.64 | 99.63 |
| scaffold09627 | 1 | 1085 | 1085 | 100   | C_unshiu_01410 | 43625  | 44709  | 1085 | 1.55 | 100   |
| scaffold09629 | 1 | 1085 | 1085 | 100   | C_unshiu_01566 | 27840  | 26756  | 1085 | 1.83 | 99.82 |
| scaffold09632 | 1 | 1084 | 1084 | 100   | C_unshiu_00152 | 309898 | 310986 | 1089 | 0.28 | 99.54 |
| scaffold09633 | 1 | 1084 | 1084 | 100   | C_unshiu_00214 | 244364 | 245448 | 1085 | 0.33 | 99.91 |
| scaffold09634 | 1 | 1084 | 1084 | 100   | C_unshiu_00190 | 86919  | 88008  | 1090 | 0.32 | 98.63 |
| scaffold09636 | 1 | 1084 | 1084 | 100   | C_unshiu_00481 | 16248  | 15164  | 1085 | 0.55 | 99.82 |
| scaffold09642 | 1 | 1083 | 1083 | 100   | C_unshiu_00871 | 103463 | 102381 | 1083 | 0.9  | 99.91 |
| scaffold09644 | 1 | 1083 | 1083 | 100   | C_unshiu_00227 | 134572 | 133491 | 1082 | 0.35 | 98.43 |
| scaffold09647 | 1 | 1083 | 1083 | 100   | C_unshiu_00740 | 112090 | 113172 | 1083 | 0.79 | 100   |
| scaffold09649 | 1 | 1082 | 1082 | 100   | C_unshiu_00430 | 18090  | 17008  | 1083 | 0.5  | 99.91 |
| scaffold09654 | 1 | 1083 | 1083 | 100   | C_unshiu_00174 | 17045  | 18126  | 1082 | 0.3  | 99.08 |
| scaffold09657 | 1 | 1083 | 1083 | 100   | C_unshiu_00278 | 55310  | 54233  | 1078 | 0.39 | 98.06 |
| scaffold09658 | 1 | 1082 | 1082 | 100   | C_unshiu_00782 | 95469  | 96550  | 1082 | 0.83 | 99.26 |
| scaffold09659 | 1 | 1080 | 1080 | 100   | C_unshiu_00607 | 17312  | 16235  | 1078 | 0.65 | 99.54 |
| scaffold09661 | 1 | 1050 | 1050 | 97.13 | C_unshiu_00079 | 240783 | 239737 | 1047 | 0.21 | 99.62 |
| scaffold09662 | 1 | 1081 | 1081 | 100   | C_unshiu_00475 | 55653  | 56728  | 1076 | 0.54 | 99.26 |
| scaffold09664 | 1 | 1081 | 1081 | 100   | C_unshiu_00378 | 28007  | 29087  | 1081 | 0.47 | 99.91 |
| scaffold09666 | 1 | 1081 | 1081 | 100   | C_unshiu_01478 | 19797  | 18735  | 1063 | 1.65 | 98.33 |
| scaffold09667 | 1 | 1081 | 1081 | 100   | C_unshiu_00339 | 214968 | 216048 | 1081 | 0.43 | 99.91 |
| scaffold09669 | 1 | 1081 | 1081 | 100   | C_unshiu_00724 | 99563  | 98483  | 1081 | 0.77 | 100   |
| scaffold09670 | 1 | 1081 | 1081 | 100   | C_unshiu_00695 | 9193   | 8113   | 1081 | 0.75 | 100   |
| scaffold09675 | 1 | 1080 | 1080 | 100   | C_unshiu_02951 | 13215  | 12136  | 1080 | 7.46 | 99.63 |
| scaffold09677 | 1 | 1081 | 1081 | 100   | C_unshiu_01515 | 48721  | 47641  | 1081 | 1.73 | 98.43 |
| scaffold09678 | 1 | 1080 | 1080 | 100   | C_unshiu_00533 | 4539   | 5616   | 1078 | 0.59 | 99.07 |
| scaffold09682 | 1 | 1022 | 1022 | 94.72 | C_unshiu_00517 | 41842  | 40820  | 1023 | 0.55 | 99.9  |
| scaffold09685 | 1 | 1068 | 1068 | 100   | C_unshiu_00453 | 155610 | 154544 | 1067 | 0.52 | 99.63 |
| scaffold09688 | 1 | 1079 | 1079 | 100   | C_unshiu_00382 | 92663  | 93741  | 1079 | 0.47 | 100   |
| scaffold09690 | 1 | 1078 | 1078 | 100   | C_unshiu_00223 | 13287  | 14362  | 1076 | 0.34 | 99.44 |
| scaffold09692 | 1 | 1079 | 1079 | 100   | C_unshiu_00118 | 231207 | 232285 | 1079 | 0.25 | 100   |
| scaffold09694 | 1 | 1078 | 1078 | 100   | C_unshiu_00119 | 303525 | 304603 | 1079 | 0.25 | 99.63 |
| scaffold09697 | 1 | 1079 | 1079 | 100   | C_unshiu_00009 | 414830 | 415909 | 1080 | 0.1  | 99.45 |
| scaffold09698 | 1 | 1079 | 1079 | 100   | C_unshiu_00711 | 78572  | 77495  | 1078 | 0.76 | 99.72 |
| scaffold09703 | 1 | 1078 | 1078 | 100   | C_unshiu_00060 | 425390 | 426467 | 1078 | 0.19 | 99.91 |
| scaffold09713 | 1 | 1076 | 1076 | 100   | C_unshiu_00783 | 63895  | 64965  | 1071 | 0.82 | 98.61 |
| scaffold09715 | 1 | 1077 | 1077 | 100   | C_unshiu_00902 | 113657 | 112581 | 1077 | 0.92 | 99.91 |
| scaffold09719 | 1 | 1077 | 1077 | 100   | C_unshiu_02064 | 13403  | 14479  | 1077 | 2.82 | 99.44 |
| scaffold09720 | 1 | 1077 | 1077 | 100   | C_unshiu_00562 | 90354  | 89275  | 1080 | 0.62 | 99.72 |
| scaffold09723 | 1 | 1077 | 1077 | 100   | C_unshiu_00294 | 121589 | 120513 | 1077 | 0.4  | 100   |
| scaffold09724 | 1 | 1075 | 1075 | 100   | C_unshiu_00366 | 213058 | 214134 | 1077 | 0.46 | 99.81 |
| scaffold09726 | 1 | 1076 | 1076 | 100   | C_unshiu_00183 | 254049 | 255135 | 1087 | 0.31 | 98.44 |
| scaffold09735 | 1 | 1075 | 1075 | 100   | C_unshiu_00385 | 201191 | 202265 | 1075 | 0.47 | 100   |
| scaffold09736 | 1 | 1075 | 1075 | 100   | C_unshiu_00103 | 181591 | 180517 | 1075 | 0.24 | 99.91 |
| scaffold09737 | 1 | 1075 | 1075 | 100   | C_unshiu_00612 | 115957 | 114884 | 1074 | 0.65 | 99.63 |
| scaffold09738 | 1 | 1075 | 1075 | 100   | C_unshiu_00846 | 16932  | 15858  | 1075 | 0.87 | 99.53 |
| scaffold09742 | 1 | 1074 | 1074 | 100   | C_unshiu_00071 | 497694 | 498770 | 1077 | 0.21 | 99.63 |
| scaffold09745 | 1 | 1074 | 1074 | 100   | C_unshiu_01478 | 30877  | 29804  | 1074 | 1.66 | 100   |
| scaffold09747 | 1 | 1063 | 1063 | 100   | C_unshiu_00958 | 19293  | 20361  | 1069 | 0.96 | 99.06 |

|               |   |      |      |       |                |        |        |      |      |       |
|---------------|---|------|------|-------|----------------|--------|--------|------|------|-------|
| scaffold09749 | 1 | 1073 | 1073 | 100   | C_unshiu_00207 | 306839 | 307911 | 1073 | 0.32 | 100   |
| scaffold09750 | 1 | 1073 | 1073 | 100   | C_unshiu_00324 | 80403  | 81475  | 1073 | 0.42 | 100   |
| scaffold09752 | 1 | 1073 | 1073 | 100   | C_unshiu_00914 | 44016  | 45077  | 1062 | 0.92 | 98.79 |
| scaffold09753 | 1 | 1073 | 1073 | 100   | C_unshiu_00410 | 32330  | 33402  | 1073 | 0.49 | 99.81 |
| scaffold09756 | 1 | 1073 | 1073 | 100   | C_unshiu_01041 | 91777  | 92845  | 1069 | 1.05 | 98.79 |
| scaffold09759 | 1 | 1074 | 1074 | 100   | C_unshiu_01802 | 4519   | 3447   | 1073 | 2.22 | 99.81 |
| scaffold09764 | 1 | 1072 | 1072 | 100   | C_unshiu_00413 | 126713 | 125643 | 1071 | 0.48 | 98.97 |
| scaffold09765 | 1 | 1072 | 1072 | 100   | C_unshiu_01102 | 8052   | 9124   | 1073 | 1.12 | 99.07 |
| scaffold09767 | 1 | 1072 | 1072 | 100   | C_unshiu_00416 | 125687 | 124616 | 1072 | 0.49 | 100   |
| scaffold09769 | 1 | 1072 | 1072 | 100   | C_unshiu_01516 | 31018  | 32090  | 1073 | 1.72 | 99.72 |
| scaffold09775 | 1 | 1071 | 1071 | 100   | C_unshiu_01236 | 24396  | 23326  | 1071 | 1.31 | 99.25 |
| scaffold09776 | 1 | 1071 | 1071 | 100   | C_unshiu_01139 | 66008  | 67078  | 1071 | 1.16 | 100   |
| scaffold09785 | 1 | 1070 | 1070 | 100   | C_unshiu_01242 | 61380  | 62449  | 1070 | 1.31 | 99.91 |
| scaffold09787 | 1 | 1070 | 1070 | 100   | C_unshiu_01067 | 17073  | 16014  | 1060 | 1.07 | 98.41 |
| scaffold09793 | 1 | 1069 | 1069 | 100   | C_unshiu_00438 | 96886  | 95818  | 1069 | 0.5  | 99.53 |
| scaffold09795 | 1 | 1071 | 1071 | 100   | C_unshiu_00034 | 34668  | 33604  | 1065 | 0.15 | 98.04 |
| scaffold09796 | 1 | 1069 | 1069 | 100   | C_unshiu_00030 | 452507 | 453575 | 1069 | 0.15 | 100   |
| scaffold09807 | 1 | 1068 | 1068 | 100   | C_unshiu_00057 | 320719 | 321793 | 1075 | 0.18 | 98.79 |
| scaffold09808 | 5 | 1069 | 1065 | 99.63 | C_unshiu_01438 | 26187  | 25123  | 1065 | 1.57 | 100   |
| scaffold09809 | 1 | 1068 | 1068 | 100   | C_unshiu_00009 | 797245 | 796178 | 1068 | 0.1  | 100   |
| scaffold09813 | 1 | 1068 | 1068 | 100   | C_unshiu_00190 | 234439 | 233373 | 1067 | 0.31 | 98.41 |
| scaffold09817 | 1 | 1067 | 1067 | 100   | C_unshiu_01280 | 69839  | 70905  | 1067 | 1.35 | 100   |
| scaffold09818 | 1 | 1067 | 1067 | 100   | C_unshiu_00298 | 196889 | 195823 | 1067 | 0.4  | 99.63 |
| scaffold09819 | 1 | 1067 | 1067 | 100   | C_unshiu_00817 | 72419  | 71354  | 1066 | 0.84 | 99.16 |
| scaffold09820 | 1 | 1067 | 1067 | 100   | C_unshiu_00003 | 510693 | 511760 | 1068 | 0.08 | 99.91 |
| scaffold09821 | 1 | 1067 | 1067 | 100   | C_unshiu_01544 | 35004  | 36077  | 1074 | 1.76 | 98.05 |
| scaffold09823 | 1 | 1067 | 1067 | 100   | C_unshiu_02203 | 1651   | 2717   | 1067 | 3.23 | 100   |
| scaffold09826 | 1 | 1066 | 1066 | 100   | C_unshiu_00656 | 130020 | 128953 | 1068 | 0.69 | 99.72 |
| scaffold09828 | 1 | 1066 | 1066 | 100   | C_unshiu_00169 | 359498 | 360564 | 1067 | 0.29 | 99.91 |
| scaffold09829 | 1 | 1066 | 1066 | 100   | C_unshiu_01227 | 4802   | 5868   | 1067 | 1.29 | 99.91 |
| scaffold09831 | 1 | 1066 | 1066 | 100   | C_unshiu_01011 | 50703  | 51769  | 1067 | 1.02 | 98.97 |
| scaffold09835 | 1 | 1065 | 1065 | 100   | C_unshiu_01276 | 29101  | 28037  | 1065 | 1.35 | 98.87 |
| scaffold09836 | 1 | 1065 | 1065 | 100   | C_unshiu_00259 | 259988 | 258924 | 1065 | 0.37 | 100   |
| scaffold09840 | 1 | 1065 | 1065 | 100   | C_unshiu_00054 | 291471 | 292535 | 1065 | 0.18 | 99.62 |
| scaffold09841 | 1 | 1065 | 1065 | 100   | C_unshiu_00938 | 54347  | 55418  | 1072 | 0.95 | 98.32 |
| scaffold09842 | 1 | 1065 | 1065 | 100   | C_unshiu_01360 | 45956  | 44892  | 1065 | 1.45 | 100   |
| scaffold09844 | 1 | 1064 | 1064 | 100   | C_unshiu_00260 | 152933 | 153996 | 1064 | 0.37 | 100   |
| scaffold09847 | 1 | 1064 | 1064 | 100   | C_unshiu_00085 | 51078  | 49999  | 1080 | 0.23 | 98.33 |
| scaffold09849 | 1 | 1064 | 1064 | 100   | C_unshiu_01843 | 11067  | 12130  | 1064 | 2.27 | 100   |
| scaffold09850 | 1 | 1064 | 1064 | 100   | C_unshiu_00792 | 91262  | 90199  | 1064 | 0.82 | 100   |
| scaffold09853 | 1 | 1064 | 1064 | 100   | C_unshiu_00074 | 36028  | 34968  | 1061 | 0.21 | 99.44 |
| scaffold09857 | 1 | 1063 | 1063 | 100   | C_unshiu_02059 | 34449  | 33387  | 1063 | 2.77 | 99.72 |
| scaffold09858 | 1 | 1063 | 1063 | 100   | C_unshiu_00193 | 29263  | 30325  | 1063 | 0.31 | 100   |
| scaffold09859 | 1 | 1063 | 1063 | 100   | C_unshiu_00194 | 26817  | 25755  | 1063 | 0.31 | 99.15 |
| scaffold09860 | 1 | 1063 | 1063 | 100   | C_unshiu_01040 | 44260  | 45318  | 1059 | 1.04 | 99.44 |
| scaffold09861 | 1 | 1063 | 1063 | 100   | C_unshiu_00380 | 1587   | 2649   | 1063 | 0.46 | 100   |
| scaffold09862 | 1 | 1015 | 1015 | 95.48 | C_unshiu_00651 | 13045  | 14059  | 1015 | 0.65 | 99.41 |
| scaffold09863 | 1 | 1063 | 1063 | 100   | C_unshiu_00119 | 299967 | 298905 | 1063 | 0.25 | 99.81 |
| scaffold09870 | 1 | 1062 | 1062 | 100   | C_unshiu_01620 | 6529   | 5468   | 1062 | 1.88 | 100   |
| scaffold09873 | 1 | 1062 | 1062 | 100   | C_unshiu_00489 | 63135  | 62073  | 1063 | 0.54 | 99.25 |
| scaffold09874 | 1 | 1069 | 1069 | 100   | C_unshiu_00310 | 193846 | 194916 | 1071 | 0.41 | 99.81 |
| scaffold09875 | 1 | 1061 | 1061 | 100   | C_unshiu_01125 | 35384  | 34323  | 1062 | 1.14 | 99.91 |
| scaffold09879 | 1 | 1061 | 1061 | 100   | C_unshiu_00409 | 91400  | 90336  | 1065 | 0.48 | 99.25 |
| scaffold09882 | 1 | 1061 | 1061 | 100   | C_unshiu_00470 | 200015 | 198955 | 1061 | 0.53 | 100   |
| scaffold09885 | 1 | 1060 | 1060 | 100   | C_unshiu_01172 | 87939  | 86879  | 1061 | 1.2  | 99.72 |
| scaffold09887 | 1 | 1061 | 1061 | 100   | C_unshiu_01657 | 26594  | 27654  | 1061 | 1.93 | 100   |
| scaffold09890 | 1 | 1061 | 1061 | 100   | C_unshiu_00184 | 88713  | 87653  | 1061 | 0.3  | 100   |
| scaffold09891 | 1 | 1061 | 1061 | 100   | C_unshiu_00325 | 172516 | 173576 | 1061 | 0.42 | 100   |
| scaffold09892 | 1 | 1060 | 1060 | 100   | C_unshiu_01023 | 7308   | 6249   | 1060 | 1.02 | 99.91 |
| scaffold09897 | 1 | 1057 | 1057 | 100   | C_unshiu_01447 | 52097  | 53151  | 1055 | 1.58 | 99.34 |
| scaffold09898 | 1 | 1060 | 1060 | 100   | C_unshiu_00431 | 81110  | 80051  | 1060 | 0.49 | 100   |
| scaffold09899 | 1 | 1060 | 1060 | 100   | C_unshiu_00223 | 64395  | 63336  | 1060 | 0.34 | 99.91 |
| scaffold09900 | 1 | 1059 | 1059 | 100   | C_unshiu_01576 | 171    | 1235   | 1065 | 1.81 | 98.59 |
| scaffold09903 | 1 | 1059 | 1059 | 100   | C_unshiu_00284 | 260103 | 261164 | 1062 | 0.39 | 99.53 |
| scaffold09905 | 1 | 1059 | 1059 | 100   | C_unshiu_00088 | 246485 | 247543 | 1059 | 0.23 | 99.81 |
| scaffold09906 | 1 | 1059 | 1059 | 100   | C_unshiu_00388 | 155553 | 156609 | 1057 | 0.47 | 99.43 |
| scaffold09907 | 6 | 1055 | 1050 | 99.53 | C_unshiu_02368 | 15896  | 16945  | 1050 | 3.76 | 98.86 |
| scaffold09908 | 1 | 1059 | 1059 | 100   | C_unshiu_00024 | 250626 | 249566 | 1061 | 0.14 | 98.4  |
| scaffold09910 | 1 | 1059 | 1059 | 100   | C_unshiu_01653 | 40821  | 39763  | 1059 | 1.92 | 100   |
| scaffold09913 | 1 | 1058 | 1058 | 100   | C_unshiu_01163 | 47844  | 46787  | 1058 | 1.18 | 100   |
| scaffold09914 | 1 | 1058 | 1058 | 100   | C_unshiu_00031 | 597215 | 598272 | 1058 | 0.15 | 100   |
| scaffold09923 | 1 | 1057 | 1057 | 100   | C_unshiu_00573 | 126845 | 125788 | 1058 | 0.61 | 99.81 |
| scaffold09924 | 1 | 1057 | 1057 | 100   | C_unshiu_00180 | 64268  | 65326  | 1059 | 0.29 | 99.72 |
| scaffold09925 | 1 | 1057 | 1057 | 100   | C_unshiu_00682 | 92830  | 91774  | 1057 | 0.71 | 100   |
| scaffold09931 | 1 | 1056 | 1056 | 100   | C_unshiu_00589 | 105551 | 106606 | 1056 | 0.62 | 99.72 |
| scaffold09932 | 1 | 1056 | 1056 | 100   | C_unshiu_00341 | 1997   | 942    | 1056 | 0.42 | 98.39 |
| scaffold09935 | 1 | 1056 | 1056 | 100   | C_unshiu_00759 | 4344   | 3289   | 1056 | 0.78 | 100   |
| scaffold09936 | 1 | 1056 | 1056 | 100   | C_unshiu_01203 | 12436  | 11381  | 1056 | 1.24 | 100   |
| scaffold09940 | 1 | 1055 | 1055 | 100   | C_unshiu_01134 | 18033  | 16979  | 1055 | 1.14 | 100   |

|               |   |      |      |       |                |        |        |      |      |       |
|---------------|---|------|------|-------|----------------|--------|--------|------|------|-------|
| scaffold09941 | 1 | 1055 | 1055 | 100   | C_unshiu_00237 | 279980 | 278926 | 1055 | 0.35 | 100   |
| scaffold09943 | 1 | 1055 | 1055 | 100   | C_unshiu_00795 | 89581  | 90635  | 1055 | 0.82 | 100   |
| scaffold09944 | 1 | 1055 | 1055 | 100   | C_unshiu_00013 | 7562   | 6508   | 1055 | 0.11 | 100   |
| scaffold09945 | 1 | 1055 | 1055 | 100   | C_unshiu_00104 | 348472 | 349527 | 1056 | 0.23 | 99.91 |
| scaffold09946 | 1 | 1027 | 1027 | 97.35 | C_unshiu_01994 | 27586  | 26556  | 1031 | 2.53 | 98.35 |
| scaffold09947 | 1 | 1055 | 1055 | 100   | C_unshiu_00194 | 98237  | 99298  | 1062 | 0.31 | 99.06 |
| scaffold09948 | 1 | 1055 | 1055 | 100   | C_unshiu_00803 | 80840  | 79786  | 1055 | 0.82 | 99.24 |
| scaffold09949 | 1 | 1055 | 1055 | 100   | C_unshiu_00145 | 65298  | 64244  | 1055 | 0.27 | 100   |
| scaffold09950 | 1 | 1055 | 1055 | 100   | C_unshiu_00275 | 25527  | 24468  | 1060 | 0.38 | 98.87 |
| scaffold09951 | 1 | 1055 | 1055 | 100   | C_unshiu_00707 | 30477  | 29423  | 1055 | 0.74 | 99.53 |
| scaffold09952 | 1 | 1054 | 1054 | 100   | C_unshiu_00888 | 39812  | 40847  | 1036 | 0.87 | 98.2  |
| scaffold09953 | 1 | 1054 | 1054 | 100   | C_unshiu_00574 | 56510  | 55457  | 1054 | 0.61 | 100   |
| scaffold09954 | 1 | 1054 | 1054 | 100   | C_unshiu_00074 | 15908  | 14856  | 1053 | 0.21 | 98.29 |
| scaffold09955 | 1 | 1054 | 1054 | 100   | C_unshiu_00752 | 91131  | 92184  | 1054 | 0.78 | 100   |
| scaffold09957 | 1 | 1054 | 1054 | 100   | C_unshiu_01966 | 16077  | 17130  | 1054 | 2.52 | 99.91 |
| scaffold09958 | 1 | 1054 | 1054 | 100   | C_unshiu_00192 | 298593 | 299646 | 1054 | 0.31 | 100   |
| scaffold09959 | 1 | 1054 | 1054 | 100   | C_unshiu_02233 | 29503  | 28450  | 1054 | 3.28 | 98.29 |
| scaffold09964 | 1 | 1053 | 1053 | 100   | C_unshiu_00242 | 12191  | 11139  | 1053 | 0.35 | 100   |
| scaffold09966 | 1 | 1053 | 1053 | 100   | C_unshiu_00968 | 79539  | 80591  | 1053 | 0.96 | 100   |
| scaffold09969 | 1 | 1053 | 1053 | 100   | C_unshiu_02324 | 6790   | 7842   | 1053 | 3.61 | 100   |
| scaffold09970 | 1 | 1053 | 1053 | 100   | C_unshiu_00791 | 125414 | 124362 | 1053 | 0.81 | 100   |
| scaffold09975 | 1 | 1053 | 1053 | 100   | C_unshiu_00190 | 118881 | 119933 | 1053 | 0.31 | 98.77 |
| scaffold09976 | 1 | 1052 | 1052 | 100   | C_unshiu_00845 | 97810  | 98861  | 1052 | 0.85 | 100   |
| scaffold09980 | 1 | 1052 | 1052 | 100   | C_unshiu_00241 | 76681  | 77732  | 1052 | 0.35 | 100   |
| scaffold09984 | 1 | 1051 | 1051 | 100   | C_unshiu_00078 | 434386 | 433336 | 1051 | 0.21 | 99.52 |
| scaffold09985 | 1 | 1051 | 1051 | 100   | C_unshiu_01207 | 27212  | 28252  | 1041 | 1.23 | 99.05 |
| scaffold09986 | 1 | 1051 | 1051 | 100   | C_unshiu_00113 | 45891  | 44844  | 1048 | 0.24 | 99.05 |
| scaffold09991 | 1 | 1051 | 1051 | 100   | C_unshiu_01134 | 32920  | 31870  | 1051 | 1.14 | 99.71 |
| scaffold09992 | 1 | 1051 | 1051 | 100   | C_unshiu_01395 | 4425   | 5476   | 1052 | 1.49 | 98.95 |
| scaffold09994 | 1 | 1015 | 1015 | 96.57 | C_unshiu_01142 | 55870  | 56884  | 1015 | 1.11 | 100   |
| scaffold09995 | 1 | 1051 | 1051 | 100   | C_unshiu_00132 | 176116 | 175066 | 1051 | 0.26 | 100   |
| scaffold09998 | 1 | 1050 | 1050 | 100   | C_unshiu_02511 | 17071  | 18120  | 1050 | 4.33 | 100   |
| scaffold09999 | 1 | 1048 | 1048 | 100   | C_unshiu_00173 | 324110 | 325158 | 1049 | 0.29 | 98.57 |
| scaffold10001 | 1 | 1050 | 1050 | 100   | C_unshiu_02260 | 1704   | 2755   | 1052 | 3.37 | 99.62 |
| scaffold10004 | 1 | 1050 | 1050 | 100   | C_unshiu_01063 | 12328  | 13377  | 1050 | 1.06 | 100   |
| scaffold10006 | 1 | 1050 | 1050 | 100   | C_unshiu_02780 | 15608  | 16657  | 1050 | 5.75 | 100   |
| scaffold10007 | 1 | 1054 | 1054 | 100   | C_unshiu_01532 | 14647  | 13594  | 1054 | 1.71 | 99.43 |
| scaffold10011 | 1 | 1049 | 1049 | 100   | C_unshiu_00084 | 324984 | 326032 | 1049 | 0.22 | 99.43 |
| scaffold10012 | 1 | 1049 | 1049 | 100   | C_unshiu_01304 | 65147  | 66191  | 1045 | 1.35 | 98.67 |
| scaffold10014 | 1 | 1049 | 1049 | 100   | C_unshiu_01959 | 10736  | 11783  | 1048 | 2.47 | 99.52 |
| scaffold10019 | 1 | 1048 | 1048 | 100   | C_unshiu_00062 | 67164  | 68216  | 1053 | 0.19 | 98.29 |
| scaffold10021 | 1 | 1048 | 1048 | 100   | C_unshiu_01138 | 28935  | 27888  | 1048 | 1.14 | 100   |
| scaffold10022 | 1 | 1048 | 1048 | 100   | C_unshiu_01687 | 45294  | 46340  | 1047 | 1.97 | 99.24 |
| scaffold10023 | 1 | 1048 | 1048 | 100   | C_unshiu_00036 | 161997 | 160950 | 1048 | 0.15 | 100   |
| scaffold10024 | 1 | 1048 | 1048 | 100   | C_unshiu_00700 | 95636  | 94584  | 1053 | 0.73 | 99.24 |
| scaffold10026 | 1 | 1048 | 1048 | 100   | C_unshiu_00841 | 81246  | 82290  | 1045 | 0.85 | 99.14 |
| scaffold10029 | 1 | 1048 | 1048 | 100   | C_unshiu_01731 | 42898  | 41848  | 1051 | 2.04 | 99.71 |
| scaffold10033 | 1 | 1047 | 1047 | 100   | C_unshiu_00152 | 355831 | 354784 | 1048 | 0.27 | 99.52 |
| scaffold10034 | 1 | 1045 | 1045 | 100   | C_unshiu_01902 | 14009  | 15056  | 1048 | 2.35 | 98.66 |
| scaffold10036 | 1 | 1047 | 1047 | 100   | C_unshiu_01113 | 66962  | 68008  | 1047 | 1.11 | 100   |
| scaffold10038 | 1 | 1047 | 1047 | 100   | C_unshiu_00256 | 91587  | 90541  | 1047 | 0.36 | 99.9  |
| scaffold10039 | 1 | 1047 | 1047 | 100   | C_unshiu_00475 | 194904 | 195950 | 1047 | 0.52 | 99.52 |
| scaffold10040 | 1 | 1046 | 1046 | 100   | C_unshiu_00160 | 180892 | 181937 | 1046 | 0.28 | 99.71 |
| scaffold10041 | 1 | 1046 | 1046 | 100   | C_unshiu_01570 | 41657  | 42701  | 1045 | 1.77 | 98.48 |
| scaffold10047 | 1 | 1046 | 1046 | 100   | C_unshiu_00498 | 39237  | 40283  | 1047 | 0.54 | 99.24 |
| scaffold10048 | 4 | 1046 | 1043 | 99.71 | C_unshiu_00041 | 608213 | 607161 | 1053 | 0.16 | 98.48 |
| scaffold10050 | 1 | 1046 | 1046 | 100   | C_unshiu_00328 | 17196  | 18241  | 1046 | 0.41 | 100   |
| scaffold10051 | 1 | 1046 | 1046 | 100   | C_unshiu_00434 | 56664  | 55619  | 1046 | 0.49 | 99.9  |
| scaffold10052 | 1 | 1046 | 1046 | 100   | C_unshiu_00585 | 97185  | 96140  | 1046 | 0.61 | 99.81 |
| scaffold10053 | 1 | 1046 | 1046 | 100   | C_unshiu_00794 | 99301  | 100346 | 1046 | 0.81 | 100   |
| scaffold10057 | 1 | 1045 | 1045 | 100   | C_unshiu_00726 | 64400  | 63356  | 1045 | 0.75 | 99.81 |
| scaffold10059 | 1 | 1044 | 1044 | 100   | C_unshiu_00114 | 400401 | 399355 | 1047 | 0.24 | 99.24 |
| scaffold10060 | 1 | 1044 | 1044 | 100   | C_unshiu_00675 | 8153   | 9198   | 1046 | 0.7  | 98.95 |
| scaffold10063 | 1 | 1044 | 1044 | 100   | C_unshiu_00144 | 212527 | 211484 | 1044 | 0.26 | 99.71 |
| scaffold10064 | 1 | 1044 | 1044 | 100   | C_unshiu_02368 | 23133  | 22089  | 1045 | 3.74 | 98.95 |
| scaffold10066 | 1 | 1043 | 1043 | 99.9  | C_unshiu_00121 | 413715 | 414761 | 1047 | 0.25 | 98.19 |
| scaffold10071 | 1 | 1043 | 1043 | 100   | C_unshiu_01307 | 14973  | 16015  | 1043 | 1.36 | 99.81 |
| scaffold10072 | 1 | 1043 | 1043 | 100   | C_unshiu_00381 | 175541 | 174499 | 1043 | 0.46 | 100   |
| scaffold10075 | 1 | 1042 | 1042 | 100   | C_unshiu_00429 | 21612  | 20571  | 1042 | 0.48 | 100   |
| scaffold10077 | 1 | 1042 | 1042 | 100   | C_unshiu_00242 | 195514 | 194473 | 1042 | 0.35 | 100   |
| scaffold10078 | 1 | 1042 | 1042 | 100   | C_unshiu_02643 | 11933  | 12974  | 1042 | 4.95 | 99.81 |
| scaffold10079 | 1 | 1042 | 1042 | 100   | C_unshiu_00330 | 180590 | 179549 | 1042 | 0.41 | 99.9  |
| scaffold10080 | 1 | 1042 | 1042 | 100   | C_unshiu_00068 | 291366 | 292407 | 1042 | 0.2  | 98.56 |
| scaffold10081 | 1 | 1042 | 1042 | 100   | C_unshiu_00112 | 56693  | 57734  | 1042 | 0.24 | 100   |
| scaffold10082 | 1 | 1043 | 1043 | 99.62 | C_unshiu_01425 | 26079  | 25040  | 1040 | 1.52 | 98.56 |
| scaffold10083 | 1 | 1042 | 1042 | 100   | C_unshiu_00166 | 368743 | 369784 | 1042 | 0.28 | 100   |
| scaffold10086 | 1 | 1041 | 1041 | 100   | C_unshiu_01015 | 1984   | 941    | 1044 | 1    | 99.71 |
| scaffold10088 | 1 | 1041 | 1041 | 100   | C_unshiu_00597 | 127355 | 128397 | 1043 | 0.62 | 98.95 |
| scaffold10089 | 1 | 1041 | 1041 | 100   | C_unshiu_00534 | 147341 | 148381 | 1041 | 0.57 | 99.23 |

|               |    |      |      |       |                |         |         |      |      |       |
|---------------|----|------|------|-------|----------------|---------|---------|------|------|-------|
| scaffold10090 | 1  | 1041 | 1041 | 100   | C_unshiu_00451 | 70346   | 69306   | 1041 | 0.5  | 100   |
| scaffold10092 | 1  | 1041 | 1041 | 100   | C_unshiu_00142 | 47474   | 48514   | 1041 | 0.26 | 100   |
| scaffold10094 | 1  | 1041 | 1041 | 100   | C_unshiu_00699 | 39709   | 40748   | 1040 | 0.72 | 99.14 |
| scaffold10095 | 1  | 1041 | 1041 | 100   | C_unshiu_01510 | 42614   | 43654   | 1041 | 1.66 | 100   |
| scaffold10100 | 1  | 1040 | 1040 | 100   | C_unshiu_00048 | 319723  | 320762  | 1040 | 0.17 | 100   |
| scaffold10101 | 1  | 1040 | 1040 | 100   | C_unshiu_02823 | 13659   | 12618   | 1042 | 5.99 | 99.33 |
| scaffold10104 | 1  | 1040 | 1040 | 100   | C_unshiu_02889 | 7931    | 6891    | 1041 | 6.51 | 99.71 |
| scaffold10105 | 1  | 1040 | 1040 | 100   | C_unshiu_00708 | 131086  | 130047  | 1040 | 0.73 | 99.42 |
| scaffold10106 | 1  | 1039 | 1039 | 100   | C_unshiu_00441 | 152157  | 151127  | 1031 | 0.49 | 98.65 |
| scaffold10109 | 1  | 1039 | 1039 | 100   | C_unshiu_00078 | 56576   | 57614   | 1039 | 0.21 | 99.81 |
| scaffold10112 | 1  | 1039 | 1039 | 100   | C_unshiu_00899 | 12621   | 11583   | 1039 | 0.89 | 100   |
| scaffold10119 | 1  | 1039 | 1039 | 100   | C_unshiu_00785 | 82090   | 81052   | 1039 | 0.8  | 99.71 |
| scaffold10120 | 1  | 1038 | 1038 | 100   | C_unshiu_00001 | 1509750 | 1510789 | 1040 | 0.04 | 99.71 |
| scaffold10122 | 1  | 1038 | 1038 | 100   | C_unshiu_00248 | 220011  | 218979  | 1033 | 0.35 | 98.46 |
| scaffold10124 | 1  | 1038 | 1038 | 100   | C_unshiu_02945 | 197     | 1236    | 1040 | 7.09 | 99.81 |
| scaffold10127 | 1  | 1037 | 1037 | 100   | C_unshiu_00210 | 303412  | 304448  | 1037 | 0.32 | 100   |
| scaffold10128 | 1  | 1037 | 1037 | 100   | C_unshiu_01286 | 19328   | 20364   | 1037 | 1.32 | 100   |
| scaffold10130 | 1  | 1037 | 1037 | 100   | C_unshiu_00391 | 221515  | 222551  | 1037 | 0.46 | 100   |
| scaffold10133 | 1  | 1037 | 1037 | 100   | C_unshiu_01297 | 38177   | 37141   | 1037 | 1.34 | 99.9  |
| scaffold10134 | 1  | 1037 | 1037 | 100   | C_unshiu_01103 | 25345   | 26383   | 1039 | 1.08 | 99.81 |
| scaffold10140 | 1  | 1036 | 1036 | 100   | C_unshiu_02557 | 155     | 1190    | 1036 | 4.48 | 100   |
| scaffold10141 | 1  | 1036 | 1036 | 100   | C_unshiu_01342 | 4324    | 3289    | 1036 | 1.39 | 100   |
| scaffold10142 | 1  | 1036 | 1036 | 100   | C_unshiu_01022 | 74920   | 73880   | 1041 | 1.01 | 99.23 |
| scaffold10143 | 1  | 1036 | 1036 | 100   | C_unshiu_01420 | 69304   | 68269   | 1036 | 1.49 | 100   |
| scaffold10146 | 1  | 1035 | 1035 | 100   | C_unshiu_02551 | 14842   | 13808   | 1035 | 4.46 | 100   |
| scaffold10148 | 1  | 1035 | 1035 | 100   | C_unshiu_00022 | 147490  | 146456  | 1035 | 0.13 | 100   |
| scaffold10150 | 1  | 1035 | 1035 | 100   | C_unshiu_00795 | 83654   | 84674   | 1021 | 0.79 | 98.45 |
| scaffold10152 | 1  | 1035 | 1035 | 100   | C_unshiu_00065 | 129642  | 128608  | 1035 | 0.19 | 100   |
| scaffold10153 | 1  | 1035 | 1035 | 100   | C_unshiu_00133 | 180778  | 179742  | 1037 | 0.25 | 99.13 |
| scaffold10154 | 1  | 1035 | 1035 | 100   | C_unshiu_00435 | 174321  | 175356  | 1036 | 0.48 | 99.23 |
| scaffold10155 | 2  | 1035 | 1034 | 99.9  | C_unshiu_01366 | 9509    | 8476    | 1034 | 1.41 | 100   |
| scaffold10156 | 1  | 1035 | 1035 | 100   | C_unshiu_00795 | 78041   | 77000   | 1042 | 0.81 | 98.18 |
| scaffold10159 | 1  | 1034 | 1034 | 100   | C_unshiu_00369 | 106083  | 107116  | 1034 | 0.44 | 99.9  |
| scaffold10162 | 1  | 1034 | 1034 | 100   | C_unshiu_01124 | 30021   | 28988   | 1034 | 1.11 | 98.74 |
| scaffold10169 | 1  | 1033 | 1033 | 100   | C_unshiu_02225 | 30123   | 31155   | 1033 | 3.18 | 99.13 |
| scaffold10170 | 4  | 1033 | 1030 | 99.71 | C_unshiu_01679 | 41408   | 42438   | 1031 | 1.92 | 99.61 |
| scaffold10172 | 1  | 1033 | 1033 | 100   | C_unshiu_00657 | 41718   | 42750   | 1033 | 0.67 | 100   |
| scaffold10178 | 1  | 1033 | 1033 | 100   | C_unshiu_01533 | 10657   | 11689   | 1033 | 1.68 | 100   |
| scaffold10179 | 1  | 1033 | 1033 | 100   | C_unshiu_00800 | 62356   | 63388   | 1033 | 0.8  | 100   |
| scaffold10185 | 1  | 1032 | 1032 | 100   | C_unshiu_02665 | 14299   | 13267   | 1033 | 5.02 | 99.9  |
| scaffold10186 | 1  | 1032 | 1032 | 100   | C_unshiu_01186 | 75993   | 77024   | 1032 | 1.19 | 100   |
| scaffold10188 | 1  | 1032 | 1032 | 100   | C_unshiu_00124 | 234293  | 233262  | 1032 | 0.25 | 99.03 |
| scaffold10189 | 1  | 1032 | 1032 | 100   | C_unshiu_01618 | 48140   | 49171   | 1032 | 1.82 | 100   |
| scaffold10190 | 1  | 1032 | 1032 | 100   | C_unshiu_01293 | 65223   | 64192   | 1032 | 1.32 | 99.61 |
| scaffold10196 | 1  | 1031 | 1031 | 100   | C_unshiu_00310 | 196768  | 195737  | 1032 | 0.4  | 99.9  |
| scaffold10199 | 1  | 1024 | 1024 | 99.9  | C_unshiu_01569 | 56779   | 57801   | 1023 | 1.73 | 99.12 |
| scaffold10203 | 1  | 1030 | 1030 | 100   | C_unshiu_00820 | 19697   | 18667   | 1031 | 0.82 | 99.9  |
| scaffold10206 | 1  | 1030 | 1030 | 100   | C_unshiu_00304 | 28114   | 27085   | 1030 | 0.39 | 100   |
| scaffold10208 | 1  | 1030 | 1030 | 100   | C_unshiu_00318 | 144670  | 145702  | 1033 | 0.4  | 99.52 |
| scaffold10209 | 1  | 1030 | 1030 | 100   | C_unshiu_00519 | 112124  | 111095  | 1030 | 0.56 | 99.9  |
| scaffold10212 | 1  | 1029 | 1029 | 100   | C_unshiu_00233 | 290463  | 291493  | 1031 | 0.34 | 99.32 |
| scaffold10216 | 1  | 1029 | 1029 | 100   | C_unshiu_01140 | 29999   | 31027   | 1029 | 1.12 | 100   |
| scaffold10218 | 1  | 1029 | 1029 | 100   | C_unshiu_00453 | 128764  | 129793  | 1030 | 0.5  | 99.71 |
| scaffold10223 | 1  | 1028 | 1028 | 100   | C_unshiu_00449 | 165156  | 164129  | 1028 | 0.49 | 98.54 |
| scaffold10227 | 1  | 1028 | 1028 | 100   | C_unshiu_00095 | 166855  | 167896  | 1042 | 0.22 | 98.18 |
| scaffold10235 | 1  | 1027 | 1027 | 100   | C_unshiu_00482 | 164774  | 165800  | 1027 | 0.52 | 100   |
| scaffold10236 | 1  | 1027 | 1027 | 100   | C_unshiu_00110 | 415762  | 416788  | 1027 | 0.23 | 99.9  |
| scaffold10239 | 1  | 1027 | 1027 | 100   | C_unshiu_00027 | 53180   | 52154   | 1027 | 0.14 | 100   |
| scaffold10242 | 1  | 1026 | 1026 | 100   | C_unshiu_01610 | 35345   | 34320   | 1026 | 1.8  | 100   |
| scaffold10246 | 1  | 1026 | 1026 | 100   | C_unshiu_00293 | 22303   | 23328   | 1026 | 0.38 | 100   |
| scaffold10247 | 1  | 1026 | 1026 | 100   | C_unshiu_00656 | 29917   | 30943   | 1027 | 0.66 | 99.71 |
| scaffold10248 | 1  | 1026 | 1026 | 100   | C_unshiu_01317 | 21030   | 22055   | 1026 | 1.36 | 99.22 |
| scaffold10251 | 1  | 1026 | 1026 | 100   | C_unshiu_01858 | 36815   | 35790   | 1026 | 2.22 | 100   |
| scaffold10255 | 1  | 1025 | 1025 | 100   | C_unshiu_00465 | 22704   | 21681   | 1024 | 0.5  | 99.71 |
| scaffold10258 | 1  | 1025 | 1025 | 100   | C_unshiu_00090 | 139098  | 140122  | 1025 | 0.22 | 99.32 |
| scaffold10260 | 1  | 1025 | 1025 | 100   | C_unshiu_02277 | 8574    | 9598    | 1025 | 3.36 | 99.81 |
| scaffold10261 | 1  | 1025 | 1025 | 100   | C_unshiu_00035 | 667349  | 666325  | 1025 | 0.15 | 100   |
| scaffold10265 | 1  | 1024 | 1024 | 100   | C_unshiu_01118 | 71794   | 70771   | 1024 | 1.09 | 100   |
| scaffold10267 | 1  | 1024 | 1024 | 100   | C_unshiu_00029 | 388337  | 387314  | 1024 | 0.14 | 100   |
| scaffold10268 | 1  | 1024 | 1024 | 100   | C_unshiu_00041 | 451872  | 450849  | 1024 | 0.16 | 99.41 |
| scaffold10269 | 1  | 1025 | 1025 | 100   | C_unshiu_00009 | 960789  | 959761  | 1029 | 0.1  | 98.54 |
| scaffold10275 | 1  | 1023 | 1023 | 100   | C_unshiu_01546 | 18532   | 17510   | 1023 | 1.68 | 100   |
| scaffold10277 | 20 | 1021 | 1002 | 98.14 | C_unshiu_00959 | 57113   | 58113   | 1001 | 0.9  | 99.2  |
| scaffold10279 | 1  | 1020 | 1020 | 100   | C_unshiu_00179 | 269503  | 270539  | 1037 | 0.29 | 98.36 |
| scaffold10282 | 1  | 1022 | 1022 | 100   | C_unshiu_01059 | 8145    | 9166    | 1022 | 1.03 | 100   |
| scaffold10283 | 1  | 1022 | 1022 | 100   | C_unshiu_01500 | 57632   | 58652   | 1021 | 1.61 | 99.9  |
| scaffold10285 | 1  | 1022 | 1022 | 100   | C_unshiu_00573 | 151116  | 150095  | 1022 | 0.59 | 100   |
| scaffold10287 | 1  | 1022 | 1022 | 100   | C_unshiu_00091 | 80822   | 79801   | 1022 | 0.22 | 100   |
| scaffold10288 | 1  | 1022 | 1022 | 100   | C_unshiu_00377 | 11234   | 12259   | 1026 | 0.44 | 99.51 |

|               |   |      |      |      |                |        |        |      |      |       |
|---------------|---|------|------|------|----------------|--------|--------|------|------|-------|
| scaffold10290 | 1 | 1019 | 1019 | 100  | C_unshiu_00222 | 284240 | 283219 | 1022 | 0.33 | 99.51 |
| scaffold10291 | 1 | 1022 | 1022 | 100  | C_unshiu_01855 | 39450  | 38429  | 1022 | 2.21 | 99.41 |
| scaffold10293 | 1 | 1021 | 1021 | 100  | C_unshiu_00890 | 70774  | 69753  | 1022 | 0.86 | 99.12 |
| scaffold10294 | 1 | 1021 | 1021 | 100  | C_unshiu_00379 | 37347  | 38367  | 1021 | 0.44 | 100   |
| scaffold10296 | 1 | 1021 | 1021 | 100  | C_unshiu_00355 | 46744  | 45718  | 1027 | 0.43 | 98.93 |
| scaffold10298 | 1 | 1021 | 1021 | 100  | C_unshiu_00896 | 104927 | 103910 | 1018 | 0.87 | 98.83 |
| scaffold10301 | 1 | 1020 | 1020 | 100  | C_unshiu_00078 | 64185  | 65203  | 1019 | 0.2  | 99.02 |
| scaffold10302 | 1 | 1020 | 1020 | 100  | C_unshiu_00058 | 178066 | 179086 | 1021 | 0.17 | 99.12 |
| scaffold10303 | 1 | 1020 | 1020 | 100  | C_unshiu_02975 | 3091   | 4110   | 1020 | 7.47 | 100   |
| scaffold10304 | 1 | 1020 | 1020 | 100  | C_unshiu_01147 | 32113  | 31094  | 1020 | 1.12 | 99.8  |
| scaffold10305 | 1 | 1020 | 1020 | 100  | C_unshiu_01911 | 4193   | 5212   | 1020 | 2.31 | 100   |
| scaffold10307 | 1 | 1018 | 1018 | 99.9 | C_unshiu_00615 | 161703 | 162720 | 1018 | 0.62 | 100   |
| scaffold10309 | 1 | 1019 | 1019 | 100  | C_unshiu_00961 | 44984  | 46003  | 1020 | 0.92 | 98.14 |
| scaffold10315 | 1 | 1018 | 1018 | 100  | C_unshiu_01701 | 45904  | 44887  | 1018 | 1.94 | 99.61 |
| scaffold10316 | 1 | 1018 | 1018 | 100  | C_unshiu_00597 | 132207 | 133224 | 1018 | 0.6  | 99.71 |
| scaffold10318 | 1 | 1018 | 1018 | 100  | C_unshiu_01223 | 72692  | 73717  | 1026 | 1.23 | 98.64 |
| scaffold10324 | 1 | 1017 | 1017 | 100  | C_unshiu_00566 | 5617   | 4601   | 1017 | 0.58 | 99.61 |
| scaffold10326 | 1 | 1017 | 1017 | 100  | C_unshiu_00268 | 117653 | 116637 | 1017 | 0.36 | 100   |
| scaffold10328 | 1 | 1017 | 1017 | 100  | C_unshiu_00147 | 242863 | 243877 | 1015 | 0.26 | 98.82 |
| scaffold10330 | 1 | 1017 | 1017 | 100  | C_unshiu_00198 | 273566 | 272550 | 1017 | 0.3  | 100   |
| scaffold10332 | 1 | 1017 | 1017 | 100  | C_unshiu_01936 | 19667  | 18651  | 1017 | 2.35 | 100   |
| scaffold10334 | 1 | 1016 | 1016 | 100  | C_unshiu_01745 | 35156  | 34141  | 1016 | 2    | 100   |
| scaffold10337 | 1 | 1016 | 1016 | 100  | C_unshiu_00030 | 697854 | 696839 | 1016 | 0.14 | 100   |
| scaffold10340 | 1 | 1016 | 1016 | 100  | C_unshiu_00200 | 333203 | 334213 | 1011 | 0.3  | 99.21 |
| scaffold10347 | 1 | 1015 | 1015 | 100  | C_unshiu_00019 | 574511 | 575526 | 1016 | 0.12 | 99.9  |
| scaffold10348 | 1 | 1013 | 1013 | 99.8 | C_unshiu_00301 | 151442 | 150419 | 1024 | 0.39 | 98.63 |
| scaffold10349 | 1 | 1015 | 1015 | 100  | C_unshiu_01259 | 67495  | 68509  | 1015 | 1.27 | 99.9  |
| scaffold10350 | 1 | 1015 | 1015 | 100  | C_unshiu_00431 | 26259  | 25245  | 1015 | 0.47 | 100   |
| scaffold10351 | 1 | 1015 | 1015 | 100  | C_unshiu_01939 | 5643   | 4629   | 1015 | 2.35 | 99.31 |
| scaffold10352 | 1 | 1015 | 1015 | 100  | C_unshiu_00274 | 60624  | 61639  | 1016 | 0.36 | 99.7  |
| scaffold10357 | 1 | 1014 | 1014 | 100  | C_unshiu_00715 | 95121  | 96141  | 1021 | 0.72 | 98.14 |
| scaffold10360 | 1 | 1014 | 1014 | 100  | C_unshiu_00076 | 475983 | 476997 | 1015 | 0.2  | 99.51 |
| scaffold10361 | 1 | 1013 | 1013 | 100  | C_unshiu_00392 | 200971 | 201983 | 1013 | 0.45 | 99.61 |
| scaffold10366 | 1 | 1013 | 1013 | 100  | C_unshiu_02946 | 3181   | 2169   | 1013 | 6.91 | 100   |
| scaffold10371 | 1 | 1012 | 1012 | 100  | C_unshiu_01255 | 63928  | 64939  | 1012 | 1.26 | 100   |
| scaffold10373 | 1 | 1012 | 1012 | 100  | C_unshiu_00486 | 64488  | 63477  | 1012 | 0.51 | 99.8  |
| scaffold10374 | 1 | 1012 | 1012 | 100  | C_unshiu_01993 | 9268   | 8257   | 1012 | 2.48 | 100   |
| scaffold10376 | 1 | 1012 | 1012 | 100  | C_unshiu_01168 | 44572  | 45583  | 1012 | 1.14 | 100   |
| scaffold10377 | 1 | 1012 | 1012 | 100  | C_unshiu_00711 | 2484   | 1473   | 1012 | 0.71 | 99.8  |
| scaffold10379 | 1 | 1012 | 1012 | 100  | C_unshiu_00298 | 42001  | 43013  | 1013 | 0.38 | 99.8  |
| scaffold10382 | 1 | 1012 | 1012 | 100  | C_unshiu_02301 | 18679  | 17668  | 1012 | 3.39 | 100   |
| scaffold10387 | 1 | 1011 | 1011 | 100  | C_unshiu_02521 | 23487  | 22483  | 1005 | 4.19 | 99.41 |
| scaffold10389 | 1 | 1011 | 1011 | 100  | C_unshiu_00852 | 49419  | 50429  | 1011 | 0.83 | 99.9  |
| scaffold10391 | 1 | 1011 | 1011 | 100  | C_unshiu_00016 | 108303 | 109320 | 1018 | 0.12 | 98.92 |
| scaffold10392 | 1 | 1011 | 1011 | 100  | C_unshiu_00083 | 338504 | 337494 | 1011 | 0.21 | 100   |
| scaffold10393 | 1 | 1011 | 1011 | 100  | C_unshiu_00885 | 8268   | 9278   | 1011 | 0.85 | 98.42 |
| scaffold10394 | 1 | 1011 | 1011 | 100  | C_unshiu_00755 | 101054 | 102064 | 1011 | 0.75 | 100   |
| scaffold10395 | 1 | 1011 | 1011 | 100  | C_unshiu_00540 | 82708  | 83718  | 1011 | 0.56 | 100   |
| scaffold10398 | 1 | 1010 | 1010 | 100  | C_unshiu_00444 | 96649  | 97658  | 1010 | 0.48 | 99.8  |
| scaffold10399 | 1 | 1010 | 1010 | 100  | C_unshiu_00315 | 37715  | 36706  | 1010 | 0.39 | 100   |
| scaffold10401 | 1 | 1010 | 1010 | 100  | C_unshiu_02748 | 7349   | 6340   | 1010 | 5.3  | 99.9  |
| scaffold10403 | 1 | 1011 | 1011 | 100  | C_unshiu_00346 | 169701 | 168692 | 1010 | 0.41 | 98.72 |
| scaffold10406 | 1 | 1010 | 1010 | 100  | C_unshiu_00170 | 344341 | 343332 | 1010 | 0.27 | 100   |
| scaffold10407 | 1 | 1010 | 1010 | 100  | C_unshiu_01207 | 7639   | 8648   | 1010 | 1.19 | 100   |
| scaffold10413 | 1 | 1009 | 1009 | 100  | C_unshiu_02087 | 28410  | 27402  | 1009 | 2.72 | 99.7  |
| scaffold10415 | 1 | 1009 | 1009 | 100  | C_unshiu_00710 | 27797  | 26789  | 1009 | 0.71 | 100   |
| scaffold10416 | 1 | 1009 | 1009 | 100  | C_unshiu_00277 | 7636   | 8644   | 1009 | 0.36 | 100   |
| scaffold10420 | 1 | 1008 | 1008 | 100  | C_unshiu_00147 | 33167  | 34175  | 1009 | 0.26 | 98.51 |
| scaffold10421 | 1 | 1008 | 1008 | 100  | C_unshiu_00485 | 32642  | 33649  | 1008 | 0.51 | 100   |
| scaffold10422 | 1 | 1008 | 1008 | 100  | C_unshiu_02221 | 24654  | 23646  | 1009 | 3.1  | 99.5  |
| scaffold10423 | 1 | 1008 | 1008 | 100  | C_unshiu_00104 | 308028 | 309035 | 1008 | 0.22 | 100   |
| scaffold10424 | 1 | 1008 | 1008 | 100  | C_unshiu_00372 | 60404  | 59397  | 1008 | 0.43 | 100   |
| scaffold10432 | 1 | 1007 | 1007 | 100  | C_unshiu_01343 | 6267   | 7273   | 1007 | 1.35 | 100   |
| scaffold10434 | 1 | 1007 | 1007 | 100  | C_unshiu_00549 | 48000  | 46994  | 1007 | 0.56 | 100   |
| scaffold10437 | 1 | 1007 | 1007 | 100  | C_unshiu_01916 | 14499  | 15505  | 1007 | 2.28 | 99.11 |
| scaffold10438 | 1 | 1007 | 1007 | 100  | C_unshiu_00172 | 327636 | 326630 | 1007 | 0.27 | 98.21 |
| scaffold10444 | 1 | 1007 | 1007 | 100  | C_unshiu_00614 | 157235 | 158240 | 1006 | 0.61 | 99.6  |
| scaffold10446 | 1 | 1006 | 1006 | 100  | C_unshiu_00245 | 87229  | 88234  | 1006 | 0.34 | 98.61 |
| scaffold10450 | 1 | 1004 | 1004 | 99.8 | C_unshiu_01744 | 42655  | 43660  | 1006 | 1.98 | 98.81 |
| scaffold10451 | 1 | 1006 | 1006 | 100  | C_unshiu_00405 | 107880 | 106875 | 1006 | 0.45 | 100   |
| scaffold10454 | 1 | 1006 | 1006 | 100  | C_unshiu_00094 | 330052 | 331057 | 1006 | 0.22 | 100   |
| scaffold10455 | 1 | 1006 | 1006 | 100  | C_unshiu_00863 | 56509  | 57516  | 1008 | 0.83 | 98.51 |
| scaffold10456 | 1 | 1006 | 1006 | 100  | C_unshiu_00576 | 116851 | 115845 | 1007 | 0.58 | 98.81 |
| scaffold10458 | 1 | 1006 | 1006 | 100  | C_unshiu_03064 | 1140   | 135    | 1006 | 9.36 | 99.8  |
| scaffold10460 | 1 | 1006 | 1006 | 100  | C_unshiu_00809 | 70233  | 69228  | 1006 | 0.79 | 99.9  |
| scaffold10461 | 1 | 1006 | 1006 | 100  | C_unshiu_00903 | 98752  | 99757  | 1006 | 0.86 | 98.91 |
| scaffold10463 | 1 | 1008 | 1008 | 100  | C_unshiu_01379 | 42868  | 43875  | 1008 | 1.41 | 99.6  |
| scaffold10464 | 1 | 1005 | 1005 | 100  | C_unshiu_00875 | 18568  | 19572  | 1005 | 0.84 | 100   |
| scaffold10475 | 1 | 1004 | 1004 | 100  | C_unshiu_01566 | 56630  | 57633  | 1004 | 1.69 | 98.9  |

|               |   |      |      |      |                |        |        |      |      |       |
|---------------|---|------|------|------|----------------|--------|--------|------|------|-------|
| scaffold10477 | 1 | 1004 | 1004 | 100  | C_unshiu_00607 | 11299  | 10296  | 1004 | 0.61 | 100   |
| scaffold10479 | 1 | 1004 | 1004 | 100  | C_unshiu_00200 | 288405 | 287402 | 1004 | 0.3  | 100   |
| scaffold10480 | 1 | 1004 | 1004 | 100  | C_unshiu_01223 | 41525  | 40523  | 1003 | 1.2  | 98.9  |
| scaffold10481 | 1 | 1004 | 1004 | 100  | C_unshiu_01001 | 62060  | 63063  | 1004 | 0.95 | 100   |
| scaffold10489 | 1 | 1003 | 1003 | 100  | C_unshiu_00813 | 10788  | 11790  | 1003 | 0.79 | 99.5  |
| scaffold10491 | 1 | 1003 | 1003 | 100  | C_unshiu_02684 | 5083   | 4081   | 1003 | 4.96 | 99.8  |
| scaffold10493 | 1 | 1003 | 1003 | 100  | C_unshiu_00251 | 288985 | 287983 | 1003 | 0.34 | 99.8  |
| scaffold10495 | 1 | 1003 | 1003 | 100  | C_unshiu_00105 | 449738 | 450740 | 1003 | 0.22 | 98.11 |
| scaffold10502 | 1 | 1002 | 1002 | 100  | C_unshiu_02300 | 11735  | 12736  | 1002 | 3.35 | 100   |
| scaffold10505 | 1 | 1002 | 1002 | 100  | C_unshiu_00324 | 97477  | 96476  | 1002 | 0.39 | 100   |
| scaffold10507 | 3 | 1002 | 1000 | 99.8 | C_unshiu_01681 | 48586  | 47587  | 1000 | 1.87 | 99.9  |
| scaffold10509 | 1 | 1002 | 1002 | 100  | C_unshiu_00770 | 118765 | 119766 | 1002 | 0.75 | 100   |
| scaffold10514 | 1 | 1001 | 1001 | 100  | C_unshiu_00306 | 38648  | 37648  | 1001 | 0.38 | 99.9  |
| scaffold10516 | 2 | 1001 | 1000 | 99.9 | C_unshiu_00004 | 432412 | 433414 | 1003 | 0.09 | 98.61 |
| scaffold10517 | 1 | 1001 | 1001 | 100  | C_unshiu_00712 | 116461 | 117461 | 1001 | 0.7  | 100   |
| scaffold10518 | 1 | 1001 | 1001 | 100  | C_unshiu_00832 | 24429  | 25428  | 1000 | 0.8  | 99.8  |
| scaffold10519 | 1 | 1001 | 1001 | 100  | C_unshiu_00225 | 198017 | 199017 | 1001 | 0.32 | 99.7  |
| scaffold10522 | 1 | 1000 | 1000 | 100  | C_unshiu_02926 | 7541   | 6542   | 1000 | 6.58 | 98.8  |
| scaffold10525 | 1 | 1000 | 1000 | 100  | C_unshiu_02276 | 25776  | 24777  | 1000 | 3.28 | 98.2  |
| scaffold10526 | 1 | 1000 | 1000 | 100  | C_unshiu_01791 | 1067   | 68     | 1000 | 2.05 | 100   |
| scaffold10527 | 1 | 1000 | 1000 | 100  | C_unshiu_00292 | 54741  | 53742  | 1000 | 0.37 | 99.5  |
| scaffold10529 | 1 | 1000 | 1000 | 100  | C_unshiu_00675 | 114635 | 113636 | 1000 | 0.67 | 100   |
| scaffold10531 | 1 | 1000 | 1000 | 100  | C_unshiu_00362 | 235253 | 236252 | 1000 | 0.42 | 100   |
