# Supplementary material for: Mikan Genome Database (MiGD): integrated database of genome annotation, genomic diversity, and CAPS marker information for mandarin molecular breeding
Source: PubMed Central journal article supplement — Breed Sci. 2020 Mar 5;70(2):200–11. doi: 10.1270/jsbbs.19097 (PMC7272249; doi:10.1270/jsbbs.19097), 2020-03-05
Supplement: 70_200_s4.pdf [file 70_200_s4.pdf]

Supplemental Table 3. *C. clementina* specific gene groups

| ID        | Num. in <i>C. clementina</i> | Num in <i>C. umbra</i> | Num in <i>P. trifoliata</i> | Note | GO                                                                | InterPro                                                                                                                                                                                                            | Members in <i>C. clementina</i>                                                                                                                                 | Members in <i>C. umbra</i> | Members in <i>P. trifoliata</i> |
|-----------|------------------------------|------------------------|-----------------------------|------|-------------------------------------------------------------------|---------------------------------------------------------------------------------------------------------------------------------------------------------------------------------------------------------------------|-----------------------------------------------------------------------------------------------------------------------------------------------------------------|----------------------------|---------------------------------|
| GF0000787 | 7                            | 0                      | 0                           | 0    | Integrase (5); Hypothetical protein (2)                           | Aspartic peptidase domain [IPR021109] (7)                                                                                                                                                                           | scaffold_1_mRNA_1802.1,scaffold_3_mRNA_1921.1,scaffold_3_mRNA_815.1,scaffold_5_mRNA_4186.1,scaffold_8_mRNA_1156.1,scaffold_9_mRNA_1777.1,scaffold_9_mRNA_1997.1 | -                          | -                               |
| GF0004025 | 4                            | 0                      | 0                           | 0    | Hypothetical protein (4)                                          | Zeta-carotene desaturase [IPR014103] (4); Amine oxidase [IPR02937] (4); FAD/NAD(P)+binding domain [IPR023753] (4)                                                                                                   | scaffold_5_mRNA_3317.1,scaffold_5_mRNA_3333.1,scaffold_5_mRNA_3335.1,scaffold_5_mRNA_3340.1                                                                     | -                          | -                               |
| GF0009842 | 3                            | 0                      | 0                           | 0    | Monosaccharide transport protein (3)                              |                                                                                                                                                                                                                     | scaffold_3_mRNA_4804.1,scaffold_3_mRNA_5074.1,scaffold_5_mRNA_3631.1                                                                                            | -                          | -                               |
| GF0005687 | 3                            | 0                      | 0                           | 0    | Monosaccharide transport protein (3)                              |                                                                                                                                                                                                                     | scaffold_1_mRNA_2569.1,scaffold_2_mRNA_1391.1,scaffold_3_mRNA_4257.1                                                                                            | -                          | -                               |
| GF0033628 | 1                            | 0                      | 0                           | 0    | Hypothetical protein (1)                                          | Aspartic peptidase domain [IPR021109] (1); Ribonuclease H-like domain [IPR012337] (1)                                                                                                                               | scaffold_9_mRNA_996.1                                                                                                                                           | -                          | -                               |
| GF0033627 | 1                            | 0                      | 0                           | 0    | Hypothetical protein (1)                                          |                                                                                                                                                                                                                     | scaffold_9_mRNA_995.1                                                                                                                                           | -                          | -                               |
| GF0033626 | 1                            | 0                      | 0                           | 0    | Hypothetical protein (1)                                          |                                                                                                                                                                                                                     | scaffold_9_mRNA_994.1                                                                                                                                           | -                          | -                               |
| GF0033625 | 1                            | 0                      | 0                           | 0    | Hypothetical protein (1)                                          |                                                                                                                                                                                                                     | scaffold_9_mRNA_993.1                                                                                                                                           | -                          | -                               |
| GF0033624 | 1                            | 0                      | 0                           | 0    | Hypothetical protein (1)                                          | Ribosomal protein L14P [IPR000218] (1); Ribosomal protein L14P, conserved site [IPR019972] (1)                                                                                                                      | scaffold_9_mRNA_970.1                                                                                                                                           | -                          | -                               |
| GF0033623 | 1                            | 0                      | 0                           | 0    | Calcosin (1)                                                      | Calcosin-related [IPR007736] (1)                                                                                                                                                                                    | scaffold_9_mRNA_967.1                                                                                                                                           | -                          | -                               |
| GF0033622 | 1                            | 0                      | 0                           | 0    | Hypothetical protein (1)                                          | Aspartic peptidase domain [IPR021109] (1)                                                                                                                                                                           | scaffold_9_mRNA_948.1                                                                                                                                           | -                          | -                               |
| GF0033621 | 1                            | 0                      | 0                           | 0    | Hypothetical protein (1)                                          | Domain of unknown function DUF4219 [IPR025314] (1); Zinc finger, CCHC-type [IPR001878] (1)                                                                                                                          | scaffold_9_mRNA_945.1                                                                                                                                           | -                          | -                               |
| GF0033620 | 1                            | 0                      | 0                           | 0    | Hypothetical protein (1)                                          |                                                                                                                                                                                                                     | scaffold_9_mRNA_943.1                                                                                                                                           | -                          | -                               |
| GF0033619 | 1                            | 0                      | 0                           | 0    | Hypothetical protein (1)                                          | Ribonuclease H-like domain [IPR012337] (1)                                                                                                                                                                          | scaffold_9_mRNA_938.1                                                                                                                                           | -                          | -                               |
| GF0033618 | 1                            | 0                      | 0                           | 0    | Peptide transporter PTR3-A (1)                                    | Major facilitator superfamily domain [IPR020846] (1); Proton-dependent oligopeptide transporter family [IPR00109] (1)                                                                                               | scaffold_9_mRNA_931.1                                                                                                                                           | -                          | -                               |
| GF0033617 | 1                            | 0                      | 0                           | 0    | Hypothetical protein (1)                                          | Cyanate hydratase [IPR008076] (1); Lambda repressor-like, DNA-binding domain [IPR010982] (1); Cyanate lyase, C-terminal [IPR01712] (1); Cro/C3-type helix-turn-helix domain [IPR001387] (1)                         | scaffold_9_mRNA_924.1                                                                                                                                           | -                          | -                               |
| GF0033616 | 1                            | 0                      | 0                           | 0    | Putative retroelement pol polyprotein (1)                         |                                                                                                                                                                                                                     | scaffold_9_mRNA_908.1                                                                                                                                           | -                          | -                               |
| GF0033615 | 1                            | 0                      | 0                           | 0    | Hypothetical protein (1)                                          |                                                                                                                                                                                                                     | scaffold_9_mRNA_904.1                                                                                                                                           | -                          | -                               |
| GF0033614 | 1                            | 0                      | 0                           | 0    | Exosome complex component RRP4 (1)                                | Exosome complex RNA-binding protein 1/RRP40/RRP4 [IPR026999] (1); K Homology domain, type 1 [IPR004088] (1)                                                                                                         | scaffold_9_mRNA_901.1                                                                                                                                           | -                          | -                               |
| GF0033613 | 1                            | 0                      | 0                           | 0    | Desiccation PCC13-like protein (1)                                | Ferritin-related [IPR012347] (1)                                                                                                                                                                                    | scaffold_9_mRNA_90.1                                                                                                                                            | -                          | -                               |
| GF0033612 | 1                            | 0                      | 0                           | 0    | Thioesterase family protein (1)                                   | Phenylacetic acid degradation-related domain [IPR03736] (1); Thioesterase domain [IPR006883] (1); HotDog domain [IPR029069] (1)                                                                                     | scaffold_9_mRNA_9.1                                                                                                                                             | -                          | -                               |
| GF0033611 | 1                            | 0                      | 0                           | 0    | Hypothetical protein (1)                                          | proteolysis [GO:0006508 biological_process] (1); cysteine-type peptidase activity [GO:0008234 molecular_function] (1)                                                                                               | Ulp1 protease family, C-terminal catalytic domain [IPR003653] (1)                                                                                               | scaffold_9_mRNA_897.1      | -                               |
| GF0033610 | 1                            | 0                      | 0                           | 0    | Hypothetical protein (1)                                          |                                                                                                                                                                                                                     | scaffold_9_mRNA_895.1                                                                                                                                           | -                          | -                               |
| GF0033609 | 1                            | 0                      | 0                           | 0    | Hypothetical protein (1)                                          |                                                                                                                                                                                                                     | scaffold_9_mRNA_894.1                                                                                                                                           | -                          | -                               |
| GF0033608 | 1                            | 0                      | 0                           | 0    | Hypothetical protein (1)                                          |                                                                                                                                                                                                                     | scaffold_9_mRNA_893.1                                                                                                                                           | -                          | -                               |
| GF0033607 | 1                            | 0                      | 0                           | 0    | Hypothetical protein (1)                                          |                                                                                                                                                                                                                     | scaffold_9_mRNA_891.1                                                                                                                                           | -                          | -                               |
| GF0033606 | 1                            | 0                      | 0                           | 0    | Hypothetical protein (1)                                          | Transposase-associated domain [IPR029480] (1)                                                                                                                                                                       | scaffold_9_mRNA_890.1                                                                                                                                           | -                          | -                               |
| GF0033605 | 1                            | 0                      | 0                           | 0    | Hypothetical protein (1)                                          |                                                                                                                                                                                                                     | scaffold_9_mRNA_889.1                                                                                                                                           | -                          | -                               |
| GF0033604 | 1                            | 0                      | 0                           | 0    | Hypothetical protein (1)                                          |                                                                                                                                                                                                                     | scaffold_9_mRNA_886.1                                                                                                                                           | -                          | -                               |
| GF0033603 | 1                            | 0                      | 0                           | 0    | Hypothetical protein (1)                                          | Ubiquitin-related domain [IPR029071] (1)                                                                                                                                                                            | scaffold_9_mRNA_884.1                                                                                                                                           | -                          | -                               |
| GF0033602 | 1                            | 0                      | 0                           | 0    | Hypothetical protein (1)                                          | LOG family [IPR031100] (1)                                                                                                                                                                                          | scaffold_9_mRNA_880.1                                                                                                                                           | -                          | -                               |
| GF0033601 | 1                            | 0                      | 0                           | 0    | Hypothetical protein (1)                                          | Domain of unknown function DUF4216 [IPR025312] (1)                                                                                                                                                                  | scaffold_9_mRNA_878.1                                                                                                                                           | -                          | -                               |
| GF0033600 | 1                            | 0                      | 0                           | 0    | Tau class glutathione S-transferase (1)                           | protein binding [GO:0005515 molecular_function] (1)                                                                                                                                                                 | Thioredoxin-like fold [IPR012336] (1); Glutathione S-transferase, C-terminal-like [IPR010987] (1); Glutathione S-transferase, N-terminal [IPR004045] (1)        | scaffold_9_mRNA_843.2      | -                               |
| GF0033599 | 1                            | 0                      | 0                           | 0    | Hypothetical protein (1)                                          |                                                                                                                                                                                                                     | scaffold_9_mRNA_828.1                                                                                                                                           | -                          | -                               |
| GF0033598 | 1                            | 0                      | 0                           | 0    | Hypothetical protein (1)                                          | Reverse transcriptase zinc-binding domain [IPR026960] (1)                                                                                                                                                           | scaffold_9_mRNA_827.1                                                                                                                                           | -                          | -                               |
| GF0033597 | 1                            | 0                      | 0                           | 0    | Hypothetical protein (1)                                          |                                                                                                                                                                                                                     | scaffold_9_mRNA_825.1                                                                                                                                           | -                          | -                               |
| GF0033596 | 1                            | 0                      | 0                           | 0    | Hypothetical protein (1)                                          |                                                                                                                                                                                                                     | scaffold_9_mRNA_823.1                                                                                                                                           | -                          | -                               |
| GF0033595 | 1                            | 0                      | 0                           | 0    | Hypothetical protein (1)                                          |                                                                                                                                                                                                                     | scaffold_9_mRNA_820.1                                                                                                                                           | -                          | -                               |
| GF0033594 | 1                            | 0                      | 0                           | 0    | Hypothetical protein (1)                                          |                                                                                                                                                                                                                     | scaffold_9_mRNA_817.1                                                                                                                                           | -                          | -                               |
| GF0033593 | 1                            | 0                      | 0                           | 0    | Hypothetical protein (1)                                          |                                                                                                                                                                                                                     | scaffold_9_mRNA_813.1                                                                                                                                           | -                          | -                               |
| GF0033592 | 1                            | 0                      | 0                           | 0    | Hypothetical protein (1)                                          |                                                                                                                                                                                                                     | scaffold_9_mRNA_809.1                                                                                                                                           | -                          | -                               |
| GF0033591 | 1                            | 0                      | 0                           | 0    | 1-aminocyclopropane-1-carboxylate oxidase like 12 (1)             | oxidation-reduction process [GO:0055114 biological_process] (1); oxidoreductase activity [GO:0016491 molecular_function] (1)                                                                                        | Oxoglutarate/iron-dependent dioxygenase [IPR05123] (1); Isopenicillin N synthase-like [IPR027443] (1); Non-haem dioxygenase N-terminal domain [IPR026992] (1)   | scaffold_9_mRNA_799.1      | -                               |
| GF0033590 | 1                            | 0                      | 0                           | 0    | 1-aminocyclopropane-1-carboxylate oxidase like 12 (1)             | oxidation-reduction process [GO:0055114 biological_process] (1); oxidoreductase activity [GO:0016491 molecular_function] (1)                                                                                        | Non-haem dioxygenase N-terminal domain [IPR026992] (1); Isopenicillin N synthase-like [IPR027443] (1); Oxoglutarate/iron-dependent dioxygenase [IPR05123] (1)   | scaffold_9_mRNA_797.1      | -                               |
| GF0033589 | 1                            | 0                      | 0                           | 0    | Desacetoxyvindoline 4-hydroxylase, putative (1)                   | oxidation-reduction process [GO:0055114 biological_process] (1); oxidoreductase activity [GO:0016491 molecular_function] (1)                                                                                        | Oxoglutarate/iron-dependent dioxygenase [IPR05123] (1); Non-haem dioxygenase N-terminal domain [IPR026992] (1); Isopenicillin N synthase-like [IPR027443] (1)   | scaffold_9_mRNA_795.1      | -                               |
| GF0033588 | 1                            | 0                      | 0                           | 0    | Hypothetical protein (1)                                          |                                                                                                                                                                                                                     | scaffold_9_mRNA_794.1                                                                                                                                           | -                          | -                               |
| GF0033587 | 1                            | 0                      | 0                           | 0    | 1-aminocyclopropane-1-carboxylate oxidase homolog 11 (1)          | oxidoreductase activity [GO:0016491 molecular_function] (1); oxidation-reduction process [GO:0055114 biological_process] (1)                                                                                        | Isopenicillin N synthase-like [IPR027443] (1); Non-haem dioxygenase N-terminal domain [IPR026992] (1); Oxoglutarate/iron-dependent dioxygenase [IPR05123] (1)   | scaffold_9_mRNA_791.1      | -                               |
| GF0033586 | 1                            | 0                      | 0                           | 0    | Cytokinin riboside 5'-monophosphate phosphoribosyltransferase (1) |                                                                                                                                                                                                                     | LOG family [IPR031100] (1)                                                                                                                                      | scaffold_9_mRNA_790.1      | -                               |
| GF0033585 | 1                            | 0                      | 0                           | 0    | Hypothetical protein (1)                                          |                                                                                                                                                                                                                     | scaffold_9_mRNA_789.1                                                                                                                                           | -                          | -                               |
| GF0033584 | 1                            | 0                      | 0                           | 0    | Hypothetical protein (1)                                          | zinc ion binding [GO:0008270 molecular_function] (1); nucleic acid binding [GO:0003676 molecular_function] (1)                                                                                                      | Zinc finger, CCHC-type [IPR001878] (1)                                                                                                                          | scaffold_9_mRNA_780.1      | -                               |
| GF0033583 | 1                            | 0                      | 0                           | 0    | DNA repair protein XRCC4 (1)                                      | DNA binding [GO:0003677 molecular_function] (1); nucleus [GO:0005634 cellular_component] (1); DNA recombination [GO:0006310 biological_process] (1); double-strand break repair [GO:0006302 biological_process] (1) | DNA repair protein XRCC4 [IPR010585] (1)                                                                                                                        | scaffold_9_mRNA_778.1      | -                               |
| GF0033582 | 1                            | 0                      | 0                           | 0    | Hypothetical protein (1)                                          | hydrolyase activity [GO:0016787 molecular_function] (1); metabolic process [GO:0008152 biological_process] (1)                                                                                                      | Peptidase M20 [IPR002933] (1)                                                                                                                                   | scaffold_9_mRNA_775.1      | -                               |
| GF0033581 | 1                            | 0                      | 0                           | 0    | Hypothetical protein (1)                                          |                                                                                                                                                                                                                     | Pentatricopeptide repeat [IPR002885] (1)                                                                                                                        | scaffold_9_mRNA_768.1      | -                               |
| GF0033580 | 1                            | 0                      | 0                           | 0    | Hypothetical protein (1)                                          | response to wounding [GO:0009611 biological_process] (1); serine-type endopeptidase inhibitor activity [GO:0004867 molecular_function] (1)                                                                          | Proteinase inhibitor I13, potato inhibitor I [IPR000864] (1)                                                                                                    | scaffold_9_mRNA_764.1      | -                               |
| GF0033579 | 1                            | 0                      | 0                           | 0    | Hypothetical protein (1)                                          |                                                                                                                                                                                                                     | scaffold_9_mRNA_744.1                                                                                                                                           | -                          | -                               |
| GF0033578 | 1                            | 0                      | 0                           | 0    | Enoyl-CoA delta isomerase 2, peroxisomal (1)                      | catalytic activity [GO:0003824 molecular_function] (1); metabolic process [GO:0008152 biological_process] (1)                                                                                                       | Crotonase superfamily [IPR001753] (1); Clp/crotonase-like domain [IPR029045] (1)                                                                                | scaffold_9_mRNA_743.1      | -                               |
| GF0033577 | 1                            | 0                      | 0                           | 0    | Enoyl-CoA delta isomerase 2, peroxisomal (1)                      | catalytic activity [GO:0003824 molecular_function] (1); metabolic process [GO:0008152 biological_process] (1)                                                                                                       | Clp/crotonase-like domain [IPR029045] (1); Crotonase superfamily [IPR001753] (1)                                                                                | scaffold_9_mRNA_742.1      | -                               |

| ID        | Num in <i>C. clematitae</i> | Num in <i>C. ucinha</i> | Num in <i>P. trifoliata</i> | Note                                                 | GO                                                                                                                                                                                                                                                                                                                                                                         | InterPro                                                                                                                                                                                                                                                                                                                                        | Members in <i>C. clematitae</i> | Members in <i>C. ucinha</i> | Members in <i>P. trifoliata</i> |
|-----------|-----------------------------|-------------------------|-----------------------------|------------------------------------------------------|----------------------------------------------------------------------------------------------------------------------------------------------------------------------------------------------------------------------------------------------------------------------------------------------------------------------------------------------------------------------------|-------------------------------------------------------------------------------------------------------------------------------------------------------------------------------------------------------------------------------------------------------------------------------------------------------------------------------------------------|---------------------------------|-----------------------------|---------------------------------|
| GF0033576 | 1                           | 0                       | 0                           | 0 Hypothetical protein (1)                           | regulation of defense response [GO:0031347 biological_process] (1); regulation of salicylic acid mediated signaling pathway [GO:2000031 biological_process] (1); cellular response to salicylic acid stimulus [GO:0071446 biological_process] (1); integral component of membrane [GO:0016021 cellular_component] (1); protein binding [GO:0005515 molecular_function] (1) | Ankyrin repeat [IPR002110] (1); Ankyrin repeat-containing domain [IPR020683] (1); Protein accelerated cell death 6 [IPR032846] (1)                                                                                                                                                                                                              | scaffold_9_mRNA_740.1           | -                           | -                               |
| GF0033575 | 1                           | 0                       | 0                           | 0 Hypothetical protein (1)                           | integral component of membrane [GO:0016021 cellular_component] (1); cellular response to salicylic acid stimulus [GO:0071446 biological_process] (1); protein binding [GO:0005515 molecular_function] (1); Ankyrin repeat family protein, putative (1)                                                                                                                     | Ankyrin repeat [IPR002110] (1); Protein accelerated cell death 6 [IPR032846] (1); PGG domain [IPR026961] (1); Ankyrin repeat-containing domain [IPR020683] (1)                                                                                                                                                                                  | scaffold_9_mRNA_739.1           | -                           | -                               |
| GF0033574 | 1                           | 0                       | 0                           | 0 Hypothetical protein (1)                           | regulation of defense response [GO:0031347 biological_process] (1); regulation of salicylic acid mediated signaling pathway [GO:2000031 biological_process] (1)                                                                                                                                                                                                            | Ankyrin repeat [IPR002110] (1); Ankyrin repeat-containing domain [IPR020683] (1)                                                                                                                                                                                                                                                                | scaffold_9_mRNA_738.1           | -                           | -                               |
| GF0033573 | 1                           | 0                       | 0                           | 0 Hypothetical protein (1)                           |                                                                                                                                                                                                                                                                                                                                                                            |                                                                                                                                                                                                                                                                                                                                                 | scaffold_9_mRNA_732.1           | -                           | -                               |
| GF0033572 | 1                           | 0                       | 0                           | 0 Hypothetical protein (1)                           |                                                                                                                                                                                                                                                                                                                                                                            |                                                                                                                                                                                                                                                                                                                                                 | scaffold_9_mRNA_726.1           | -                           | -                               |
| GF0033571 | 1                           | 0                       | 0                           | 0 Hypothetical protein (1)                           |                                                                                                                                                                                                                                                                                                                                                                            |                                                                                                                                                                                                                                                                                                                                                 | scaffold_9_mRNA_721.1           | -                           | -                               |
| GF0033570 | 1                           | 0                       | 0                           | 0 Hypothetical protein (1)                           |                                                                                                                                                                                                                                                                                                                                                                            |                                                                                                                                                                                                                                                                                                                                                 | scaffold_9_mRNA_718.1           | -                           | -                               |
| GF0033569 | 1                           | 0                       | 0                           | 0 Hypothetical protein (1)                           | regulation of salicylic acid mediated signaling pathway [GO:2000031 biological_process] (1); regulation of defense response [GO:0031347 biological_process] (1); protein binding [GO:0005515 molecular_function] (1); integral component of membrane [GO:0016021 cellular_component] (1); cellular response to salicylic acid stimulus [GO:0071446 biological_process] (1) | Ankyrin repeat [IPR002110] (1); Ankyrin repeat-containing domain [IPR020683] (1); Protein accelerated cell death 6 [IPR032846] (1)                                                                                                                                                                                                              | scaffold_9_mRNA_715.1           | -                           | -                               |
| GF0033568 | 1                           | 0                       | 0                           | 0 Hypothetical protein (1)                           |                                                                                                                                                                                                                                                                                                                                                                            |                                                                                                                                                                                                                                                                                                                                                 | scaffold_9_mRNA_713.1           | -                           | -                               |
| GF0033567 | 1                           | 0                       | 0                           | 0 Hypothetical protein (1)                           |                                                                                                                                                                                                                                                                                                                                                                            | Domain of unknown function DUF4219 [IPR025314] (1)                                                                                                                                                                                                                                                                                              | scaffold_9_mRNA_688.1           | -                           | -                               |
| GF0033566 | 1                           | 0                       | 0                           | 0 Monosaccharide transport protein (1)               |                                                                                                                                                                                                                                                                                                                                                                            |                                                                                                                                                                                                                                                                                                                                                 | scaffold_9_mRNA_686.1           | -                           | -                               |
| GF0033565 | 1                           | 0                       | 0                           | 0 Hypothetical protein (1)                           |                                                                                                                                                                                                                                                                                                                                                                            | Retrotransposon gag domain [IPR005162] (1)                                                                                                                                                                                                                                                                                                      | scaffold_9_mRNA_685.1           | -                           | -                               |
| GF0033564 | 1                           | 0                       | 0                           | 0 3-ketoacyl-CoA synthase 2 (1)                      | catalytic activity [GO:0003824 molecular_function] (1); fatty acid biosynthetic process [GO:0006633 biological_process] (1); transferase activity, transferring acyl groups other than amino-acyl groups [GO:0016747 molecular_function] (1); membrane [GO:0016020 cellular_component] (1); metabolic process [GO:0008152 biological_process] (1)                          | FAE1/Type III polyketide synthase-like protein [IPR013601] (1); Thiolase-like protein [IPR016039] (1); Chalcone/stilbene synthase, C-terminal [IPR012298] (1); Very-long-chain 3-ketoacyl-CoA synthase [IPR012392] (1)                                                                                                                          | scaffold_9_mRNA_682.1           | -                           | -                               |
| GF0033563 | 1                           | 0                       | 0                           | 0 Hypothetical protein (1)                           | chromatin remodeling [GO:0006338 biological_process] (1); BAF-type complex [GO:0095544 cellular_component] (1); binding [GO:0005488 molecular_function] (1); membrane [GO:0016020 cellular_component] (1); metabolic process [GO:0008152 biological_process] (1)                                                                                                           | SW1SNF-like complex subunit BAF250/Osa [IPR021906] (1); Armadillo-type fold [IPR016024] (1); Armadillo-like helical [IPR011989] (1)                                                                                                                                                                                                             | scaffold_9_mRNA_681.1           | -                           | -                               |
| GF0033562 | 1                           | 0                       | 0                           | 0 3-ketoacyl-CoA synthase 11 (1)                     | transferase activity, transferring acyl groups other than amino-acyl groups [GO:0016747 molecular_function] (1); fatty acid biosynthetic process [GO:0006633 biological_process] (1); catalytic activity [GO:0003824 molecular_function] (1)                                                                                                                               | Thiolase-like [IPR016039] (1); Very-long-chain 3-ketoacyl-CoA synthase [IPR012392] (1); FAE1/Type III polyketide synthase-like protein [IPR013601] (1)                                                                                                                                                                                          | scaffold_9_mRNA_678.1           | -                           | -                               |
| GF0033561 | 1                           | 0                       | 0                           | 0 Hypothetical protein (1)                           |                                                                                                                                                                                                                                                                                                                                                                            |                                                                                                                                                                                                                                                                                                                                                 | scaffold_9_mRNA_670.1           | -                           | -                               |
| GF0033560 | 1                           | 0                       | 0                           | 0 TSA: Wollemia nobilis transcribed RNA sequence (1) | sulfate adenylyltransferase (ATP) activity [GO:0004781 molecular_function] (1)                                                                                                                                                                                                                                                                                             | Sulphate adenylyltransferase catalytic domain [IPR024951] (1); Rossmann-like alpha/beta/sandwich fold [IPR014739] (1)                                                                                                                                                                                                                           | scaffold_9_mRNA_664.1           | -                           | -                               |
| GF0033559 | 1                           | 0                       | 0                           | 0 Cation transport ATPase (1)                        | integral component of membrane [GO:0016021 cellular_component] (1); metal ion binding [GO:0046872 molecular_function] (1); nucleotide binding [GO:0000166 molecular_function] (1)                                                                                                                                                                                          | Cation-transporting P-type ATPase, N-terminal [IPR004014] (1); P-type ATPase, A domain [IPR008250] (1); P-type ATPase, transmembrane domain [IPR023298] (1); P-type ATPase, cytoplasmic domain N [IPR023299] (1); P-type ATPase [IPR001757] (1); P-type ATPase, phosphorylation site [IPR018303] (1)                                            | scaffold_9_mRNA_663.1           | -                           | -                               |
| GF0033558 | 1                           | 0                       | 0                           | 0 Glutaminase (1)                                    |                                                                                                                                                                                                                                                                                                                                                                            |                                                                                                                                                                                                                                                                                                                                                 | scaffold_9_mRNA_661.1           | -                           | -                               |
| GF0033557 | 1                           | 0                       | 0                           | 0 Cation transport ATPase (1)                        | integral component of membrane [GO:0016021 cellular_component] (1); metal ion binding [GO:0046872 molecular_function] (1); nucleotide binding [GO:0000166 molecular_function] (1)                                                                                                                                                                                          | HAD-like domain [IPR023214] (1); Cation-transporting P-type ATPase, N-terminal [IPR004014] (1); P-type ATPase, A domain [IPR008250] (1); P-type ATPase, phosphorylation site [IPR018303] (1); Cation-transporting P-type ATPase, C-terminal [IPR006068] (1); P-type ATPase, transmembrane domain [IPR023298] (1); P-type ATPase [IPR001757] (1) | scaffold_9_mRNA_660.1           | -                           | -                               |
| GF0033556 | 1                           | 0                       | 0                           | 0 Hypothetical protein (1)                           | proteolysis [GO:0006508 biological_process] (1); cysteine-type peptidase activity [GO:0008234 molecular_function] (1)                                                                                                                                                                                                                                                      | Ulp1 protease family, C-terminal catalytic domain [IPR003653] (1)                                                                                                                                                                                                                                                                               | scaffold_9_mRNA_653.1           | -                           | -                               |
| GF0033555 | 1                           | 0                       | 0                           | 0 Hypothetical protein (1)                           |                                                                                                                                                                                                                                                                                                                                                                            |                                                                                                                                                                                                                                                                                                                                                 | scaffold_9_mRNA_629.1           | -                           | -                               |
| GF0033554 | 1                           | 0                       | 0                           | 0 Hypothetical protein (1)                           |                                                                                                                                                                                                                                                                                                                                                                            | FAR1 DNA binding domain [IPR004330] (1)                                                                                                                                                                                                                                                                                                         | scaffold_9_mRNA_625.1           | -                           | -                               |
| GF0033553 | 1                           | 0                       | 0                           | 0 ADP-ribosylation factor A1F (1)                    | small GTPase mediated signal transduction [GO:0007264 biological_process] (1); GTP binding [GO:0005525 molecular_function] (1); intracellular [GO:0005622 cellular_component] (1)                                                                                                                                                                                          | P-loop containing nucleoside triphosphate hydrolase [IPR027417] (1); Small GTP-binding protein domain [IPR005225] (1); Small GTPase superfamily, ARF type [IPR024156] (1); Small GTPase superfamily, ARF/SAR type [IPR006693] (1)                                                                                                               | scaffold_9_mRNA_621.1           | -                           | -                               |
| GF0033552 | 1                           | 0                       | 0                           | 0 Hypothetical protein (1)                           |                                                                                                                                                                                                                                                                                                                                                                            |                                                                                                                                                                                                                                                                                                                                                 | scaffold_9_mRNA_61.1            | -                           | -                               |
| GF0033551 | 1                           | 0                       | 0                           | 0 Monosaccharide transport protein (1)               |                                                                                                                                                                                                                                                                                                                                                                            |                                                                                                                                                                                                                                                                                                                                                 | scaffold_9_mRNA_599.1           | -                           | -                               |
| GF0033550 | 1                           | 0                       | 0                           | 0 Hypothetical protein (1)                           |                                                                                                                                                                                                                                                                                                                                                                            | Glyoxalase/fofomycin resistance/dioxygenase domain [IPR004360] (1); Glyoxalase/Bleomycin resistance protein/Dihydroxybiphenyl dioxygenase [IPR029068] (1)                                                                                                                                                                                       | scaffold_9_mRNA_586.1           | -                           | -                               |
| GF0033549 | 1                           | 0                       | 0                           | 0 Hypothetical protein (1)                           |                                                                                                                                                                                                                                                                                                                                                                            |                                                                                                                                                                                                                                                                                                                                                 | scaffold_9_mRNA_584.1           | -                           | -                               |
| GF0033548 | 1                           | 0                       | 0                           | 0 Hypothetical protein (1)                           |                                                                                                                                                                                                                                                                                                                                                                            | Glyoxalase/Bleomycin resistance protein/Dihydroxybiphenyl dioxygenase [IPR029068] (1)                                                                                                                                                                                                                                                           | scaffold_9_mRNA_583.1           | -                           | -                               |
| GF0033547 | 1                           | 0                       | 0                           | 0 Late embryogenesis abundant D-like protein (1)     |                                                                                                                                                                                                                                                                                                                                                                            | Seed maturation protein [IPR007011] (1)                                                                                                                                                                                                                                                                                                         | scaffold_9_mRNA_582.1           | -                           | -                               |
| GF0033546 | 1                           | 0                       | 0                           | 0 Hypothetical protein (1)                           | cysteine-type peptidase activity [GO:0008234 molecular_function] (1); proteolysis [GO:0006508 biological_process] (1)                                                                                                                                                                                                                                                      | Domain of unknown function DUF1985 [IPR015410] (1); Ulp1 protease family, C-terminal catalytic domain [IPR003653] (1)                                                                                                                                                                                                                           | scaffold_9_mRNA_563.1           | -                           | -                               |
| GF0033545 | 1                           | 0                       | 0                           | 0 Hypothetical protein (1)                           |                                                                                                                                                                                                                                                                                                                                                                            | MULE transposase domain [IPR018289] (1); Transposase, Mu/DR, plant [IPR004332] (1)                                                                                                                                                                                                                                                              | scaffold_9_mRNA_562.1           | -                           | -                               |
| GF0033544 | 1                           | 0                       | 0                           | 0 Transposable element Ac (1)                        | nucleic acid binding [GO:0003676 molecular_function] (1)                                                                                                                                                                                                                                                                                                                   | Ribonuclease H-like domain [IPR012337] (1)                                                                                                                                                                                                                                                                                                      | scaffold_9_mRNA_551.1           | -                           | -                               |
| GF0033543 | 1                           | 0                       | 0                           | 0 Amino-terminal domain cyclin (1)                   |                                                                                                                                                                                                                                                                                                                                                                            | Cyclic N-terminal [IPR006671] (1); Cyclin-like [IPR013763] (1)                                                                                                                                                                                                                                                                                  | scaffold_9_mRNA_534.1           | -                           | -                               |
| GF0033542 | 1                           | 0                       | 0                           | 0 Hypothetical protein (1)                           | nucleic acid binding [GO:0003676 molecular_function] (1); protein dimerization activity [GO:0046983 molecular_function] (1)                                                                                                                                                                                                                                                | HAT, C-terminal dimerisation domain [IPR008906] (1); Ribonuclease H-like domain [IPR012337] (1)                                                                                                                                                                                                                                                 | scaffold_9_mRNA_527.1           | -                           | -                               |
| GF0033541 | 1                           | 0                       | 0                           | 0 Hypothetical protein (1)                           |                                                                                                                                                                                                                                                                                                                                                                            |                                                                                                                                                                                                                                                                                                                                                 | scaffold_9_mRNA_521.1           | -                           | -                               |
| GF0033540 | 1                           | 0                       | 0                           | 0 Type II peroxidoxin (1)                            | oxidoreductase activity [GO:0016491 molecular_function] (1); cell redox homeostasis [GO:004544 biological_process] (1)                                                                                                                                                                                                                                                     | Thioredoxin domain [IPR013766] (1); Thioredoxin-like fold [IPR012336] (1); Redoxin [IPR013740] (1)                                                                                                                                                                                                                                              | scaffold_9_mRNA_502.1           | -                           | -                               |
| GF0033539 | 1                           | 0                       | 0                           | 0 Bidirectional sugar transporter SWEET6b (1)        | integral component of membrane [GO:0016021 cellular_component] (1)                                                                                                                                                                                                                                                                                                         | SWEET sugar transporter [IPR004316] (1)                                                                                                                                                                                                                                                                                                         | scaffold_9_mRNA_501.1           | -                           | -                               |
| GF0033538 | 1                           | 0                       | 0                           | 0 Hypothetical protein (1)                           |                                                                                                                                                                                                                                                                                                                                                                            |                                                                                                                                                                                                                                                                                                                                                 | scaffold_9_mRNA_495.1           | -                           | -                               |
| GF0033537 | 1                           | 0                       | 0                           | 0 Hypothetical protein (1)                           |                                                                                                                                                                                                                                                                                                                                                                            |                                                                                                                                                                                                                                                                                                                                                 | scaffold_9_mRNA_489.1           | -                           | -                               |
| GF0033536 | 1                           | 0                       | 0                           | 0 Hypothetical protein (1)                           | nucleic acid binding [GO:0003676 molecular_function] (1)                                                                                                                                                                                                                                                                                                                   | Ribonuclease H-like domain [IPR012337] (1)                                                                                                                                                                                                                                                                                                      | scaffold_9_mRNA_487.1           | -                           | -                               |

| ID        | Num. in <i>C. clementinae</i> | Num. in <i>C. uastha</i> | Num. in <i>P. trifoliata</i> | Note                                                                | GO                                                                                                                                                                                                                                                           | InterPro                                                                                                                                                                                                                                                                                                                                                                                                                                                                                                                                                                                                                                                                                                   | Members in <i>C. clementinae</i> | Members in <i>C. uastha</i> | Members in <i>P. trifoliata</i> |
|-----------|-------------------------------|--------------------------|------------------------------|---------------------------------------------------------------------|--------------------------------------------------------------------------------------------------------------------------------------------------------------------------------------------------------------------------------------------------------------|------------------------------------------------------------------------------------------------------------------------------------------------------------------------------------------------------------------------------------------------------------------------------------------------------------------------------------------------------------------------------------------------------------------------------------------------------------------------------------------------------------------------------------------------------------------------------------------------------------------------------------------------------------------------------------------------------------|----------------------------------|-----------------------------|---------------------------------|
| GF0033535 | 1                             | 0                        | 0                            | 0 Basic 7S globulin (1)                                             | proteolysis [GO:0006508 biological_process] (1); aspartic-type endopeptidase activity [GO:0004190 molecular_function] (1)                                                                                                                                    | Aspartic peptidase A1 family [IPRO1461] (1); Xylanase inhibitor, N-terminal [IPRO32861] (1); Xylanase inhibitor, C-terminal [IPRO32799] (1); Xylanase inhibitor I-like [IPRO33868] (1); Aspartic peptidase domain [IPRO21109] (1); Peptidase family A1 domain [IPRO33121] (1)                                                                                                                                                                                                                                                                                                                                                                                                                              | scaffold_9_mRNA_486.1            | -                           | -                               |
| GF0033534 | 1                             | 0                        | 0                            | 0 Basic 7S globulin (1)                                             | proteolysis [GO:0006508 biological_process] (1); aspartic-type endopeptidase activity [GO:0004190 molecular_function] (1)                                                                                                                                    | Peptidase family A1 domain [IPRO33121] (1); Aspartic peptidase domain [IPRO21109] (1); Xylanase inhibitor I-like [IPRO33868] (1); Aspartic peptidase A1 family [IPRO1461] (1); Xylanase inhibitor, C-terminal [IPRO32799] (1); Xylanase inhibitor, N-terminal [IPRO32861] (1)                                                                                                                                                                                                                                                                                                                                                                                                                              | scaffold_9_mRNA_484.1            | -                           | -                               |
| GF0033533 | 1                             | 0                        | 0                            | 0 Basic 7S globulin (1)                                             | proteolysis [GO:0006508 biological_process] (1); aspartic-type endopeptidase activity [GO:0004190 molecular_function] (1)                                                                                                                                    | Xylanase inhibitor I-like [IPRO33868] (1); Xylanase inhibitor, C-terminal [IPRO32799] (1); Xylanase inhibitor, N-terminal [IPRO32861] (1); Aspartic peptidase A1 family [IPRO1461] (1); Aspartic peptidase domain [IPRO21109] (1); Peptidase family A1 domain [IPRO33121] (1)                                                                                                                                                                                                                                                                                                                                                                                                                              | scaffold_9_mRNA_483.1            | -                           | -                               |
| GF0033532 | 1                             | 0                        | 0                            | 0 Hypothetical protein (1)                                          |                                                                                                                                                                                                                                                              | EF-hand domain pair [IPRO11992] (1); EF-hand domain [IPRO20488] (1); EF-Hand 1, calcium-binding site [IPRO18247] (1)                                                                                                                                                                                                                                                                                                                                                                                                                                                                                                                                                                                       | scaffold_9_mRNA_482.1            | -                           | -                               |
| GF0033531 | 1                             | 0                        | 0                            | 0 Hypothetical protein (1)                                          | calcium ion binding [GO:0005509 molecular_function] (1)                                                                                                                                                                                                      | EF-hand domain [IPRO20488] (1); EF-Hand 1, calcium-binding site [IPRO18247] (1)                                                                                                                                                                                                                                                                                                                                                                                                                                                                                                                                                                                                                            | scaffold_9_mRNA_456.1            | -                           | -                               |
| GF0033530 | 1                             | 0                        | 0                            | 0 Hypothetical protein (1)                                          | calcium ion binding [GO:0005509 molecular_function] (1)                                                                                                                                                                                                      | EF-hand domain [IPRO20488] (1); EF-Hand 1, calcium-binding site [IPRO18247] (1); EF-hand domain pair [IPRO11992] (1)                                                                                                                                                                                                                                                                                                                                                                                                                                                                                                                                                                                       | scaffold_9_mRNA_452.1            | -                           | -                               |
| GF0033529 | 1                             | 0                        | 0                            | 0 Hypothetical protein (1)                                          |                                                                                                                                                                                                                                                              | EF-hand domain pair [IPRO11992] (1)                                                                                                                                                                                                                                                                                                                                                                                                                                                                                                                                                                                                                                                                        | scaffold_9_mRNA_447.1            | -                           | -                               |
| GF0033528 | 1                             | 0                        | 0                            | 0 Diene lactone hydrolase family, putative (1)                      | hydrolase activity [GO:0016787 molecular_function] (1)                                                                                                                                                                                                       | Diene lactone hydrolase [IPRO02925] (1); Alpha/Beta hydrolase fold [IPRO029058] (1)                                                                                                                                                                                                                                                                                                                                                                                                                                                                                                                                                                                                                        | scaffold_9_mRNA_445.1            | -                           | -                               |
| GF0033527 | 1                             | 0                        | 0                            | 0 Hypothetical protein (1)                                          | metabolic process [GO:0008152 biological_process] (1); transferase activity, transferring hexosyl groups [GO:0016758 molecular_function] (1)                                                                                                                 | UDP-glucuronosyl UDP-glucosyltransferase [IPRO02213] (1)                                                                                                                                                                                                                                                                                                                                                                                                                                                                                                                                                                                                                                                   | scaffold_9_mRNA_442.1            | -                           | -                               |
| GF0033526 | 1                             | 0                        | 0                            | 0 Hypothetical protein (1)                                          |                                                                                                                                                                                                                                                              |                                                                                                                                                                                                                                                                                                                                                                                                                                                                                                                                                                                                                                                                                                            | scaffold_9_mRNA_44.1             | -                           | -                               |
| GF0033525 | 1                             | 0                        | 0                            | 0 Ankyrin repeat plant-like protein (1)                             | protein binding [GO:0005515 molecular_function] (1)                                                                                                                                                                                                          | Ankyrin repeat [IPRO02110] (1); Ankyrin repeat-containing domain [IPRO20683] (1)                                                                                                                                                                                                                                                                                                                                                                                                                                                                                                                                                                                                                           | scaffold_9_mRNA_436.1            | -                           | -                               |
| GF0033524 | 1                             | 0                        | 0                            | 0 Hypothetical protein (1)                                          |                                                                                                                                                                                                                                                              | F-box associated interaction domain [IPRO17451] (1)                                                                                                                                                                                                                                                                                                                                                                                                                                                                                                                                                                                                                                                        | scaffold_9_mRNA_435.1            | -                           | -                               |
| GF0033523 | 1                             | 0                        | 0                            | 0 Hypothetical protein (1)                                          |                                                                                                                                                                                                                                                              |                                                                                                                                                                                                                                                                                                                                                                                                                                                                                                                                                                                                                                                                                                            | scaffold_9_mRNA_420.1            | -                           | -                               |
| GF0033522 | 1                             | 0                        | 0                            | 0 Hypothetical protein (1)                                          |                                                                                                                                                                                                                                                              | Retrotransposon gag domain [IPRO05162] (1)                                                                                                                                                                                                                                                                                                                                                                                                                                                                                                                                                                                                                                                                 | scaffold_9_mRNA_42.1             | -                           | -                               |
| GF0033521 | 1                             | 0                        | 0                            | 0 Hypothetical protein (1)                                          |                                                                                                                                                                                                                                                              |                                                                                                                                                                                                                                                                                                                                                                                                                                                                                                                                                                                                                                                                                                            | scaffold_9_mRNA_419.1            | -                           | -                               |
| GF0033520 | 1                             | 0                        | 0                            | 0 Hypothetical protein (1)                                          |                                                                                                                                                                                                                                                              | Pectin lyase fold [IPRO12334] (1); Pectate lyase superfamily protein [IPRO24555] (1); Pectin lyase fold/violence factor [IPRO11050] (1)                                                                                                                                                                                                                                                                                                                                                                                                                                                                                                                                                                    | scaffold_9_mRNA_414.1            | -                           | -                               |
| GF0033519 | 1                             | 0                        | 0                            | 0 Hypothetical protein (1)                                          |                                                                                                                                                                                                                                                              |                                                                                                                                                                                                                                                                                                                                                                                                                                                                                                                                                                                                                                                                                                            | scaffold_9_mRNA_41.1             | -                           | -                               |
| GF0033518 | 1                             | 0                        | 0                            | 0 Hypothetical protein (1)                                          |                                                                                                                                                                                                                                                              |                                                                                                                                                                                                                                                                                                                                                                                                                                                                                                                                                                                                                                                                                                            | scaffold_9_mRNA_406.1            | -                           | -                               |
| GF0033517 | 1                             | 0                        | 0                            | 0 T-complex protein 1 subunit gamma (1)                             | ATP binding [GO:0005524 molecular_function] (1); unfolded protein binding [GO:0051082 molecular_function] (1); protein folding [GO:0006457 biological_process] (1)                                                                                           | Chaperonin TCP-1, conserved site [IPRO02194] (1); Chaperone tailless complex polypeptide 1 (TCP-1) [IPRO17998] (1); T-complex protein 1, gamma subunit [IPRO12719] (1); GroEL-like equatorial domain [IPRO027413] (1); Chaperonin Cp60/TCP-1 family [IPRO02423] (1); GroEL-like apical domain [IPRO27409] (1)                                                                                                                                                                                                                                                                                                                                                                                              | scaffold_9_mRNA_3839.1           | -                           | -                               |
| GF0033516 | 1                             | 0                        | 0                            | 0 Hypothetical protein (1)                                          |                                                                                                                                                                                                                                                              |                                                                                                                                                                                                                                                                                                                                                                                                                                                                                                                                                                                                                                                                                                            | scaffold_9_mRNA_3813.1           | -                           | -                               |
| GF0033515 | 1                             | 0                        | 0                            | 0 Hypothetical protein (1)                                          |                                                                                                                                                                                                                                                              |                                                                                                                                                                                                                                                                                                                                                                                                                                                                                                                                                                                                                                                                                                            | scaffold_9_mRNA_3812.1           | -                           | -                               |
| GF0033514 | 1                             | 0                        | 0                            | 0 Polynucleotidyl transferase, Ribonuclease H fold (1)              | nucleic acid binding [GO:0003676 molecular_function] (1)                                                                                                                                                                                                     | Reverse transcriptase zinc-binding domain [IPRO35960] (1); Ribonuclease H-like domain [IPRO12337] (1)                                                                                                                                                                                                                                                                                                                                                                                                                                                                                                                                                                                                      | scaffold_9_mRNA_3811.1           | -                           | -                               |
| GF0033513 | 1                             | 0                        | 0                            | 0 Ribosomal protein L33 family protein (1)                          | ribosome [GO:0005840 cellular_component] (1); translation [GO:0006412 biological_process] (1); intracellular [GO:0005622 cellular_component] (1); structural constituent of ribosome [GO:0003735 molecular_function] (1)                                     | Zinc-binding ribosomal protein [IPRO11332] (1); Ribosomal protein L33 [IPRO01705] (1)                                                                                                                                                                                                                                                                                                                                                                                                                                                                                                                                                                                                                      | scaffold_9_mRNA_377.2            | -                           | -                               |
| GF0033512 | 1                             | 0                        | 0                            | 0 Hypothetical protein (1)                                          |                                                                                                                                                                                                                                                              |                                                                                                                                                                                                                                                                                                                                                                                                                                                                                                                                                                                                                                                                                                            | scaffold_9_mRNA_3755.1           | -                           | -                               |
| GF0033511 | 1                             | 0                        | 0                            | 0 Hypothetical protein (1)                                          | nucleic acid binding [GO:0003676 molecular_function] (1); protein dimerization activity [GO:0046983 molecular_function] (1); DNA binding [GO:0003677 molecular_function] (1); regulation of transcription, DNA-templated [GO:0006355 biological_process] (1) | NAC domain [IPRO03441] (1); Zinc finger, BED-type [IPRO03656] (1); hAT-like transposase, RNase-H fold [IPRO25525] (1); Ribonuclease H-like domain [IPRO12337] (1); Zinc finger C2H2-type [IPRO13087] (1); HAT, C-terminal dimerization domain [IPRO08996] (1)                                                                                                                                                                                                                                                                                                                                                                                                                                              | scaffold_9_mRNA_3730.1           | -                           | -                               |
| GF0033510 | 1                             | 0                        | 0                            | 0 Elongation factor 2 (1)                                           | GTPase activity [GO:0003924 molecular_function] (1); GTP binding [GO:0005525 molecular_function] (1)                                                                                                                                                         | Small GTP-binding protein domain [IPRO05225] (1); P-loop containing nucleoside triphosphate hydrolase [IPRO27417] (1); Translation elongation factor EF1A/EF2, domain IV [IPRO05517] (1); Translation protein, beta-barrel domain [IPRO09000] (1); Translation elongation factor EFG, V domain [IPRO00640] (1); Ribosomal protein S5 domain 2-type fold, subgroup [IPRO14721] (1); T-type G domain, conserved site [IPRO31571] (1); Translation elongation factor EF1u-like, domain 2 [IPRO04161] (1); Transcription factor, GTP-binding domain [IPRO00795] (1); Eucosmin-like [IPRO04263] (1); Elongation factor G, III-V domain [IPRO09022] (1); Ribosomal protein S5 domain 2-type fold [IPRO20568] (1) | scaffold_9_mRNA_3726.1           | -                           | -                               |
| GF0033509 | 1                             | 0                        | 0                            | 0 Hypothetical protein (1)                                          |                                                                                                                                                                                                                                                              |                                                                                                                                                                                                                                                                                                                                                                                                                                                                                                                                                                                                                                                                                                            | scaffold_9_mRNA_3718.1           | -                           | -                               |
| GF0033508 | 1                             | 0                        | 0                            | 0 Cyclic nucleotide-gated ion channel 1 (1)                         |                                                                                                                                                                                                                                                              | Cyclic nucleotide-binding-like [IPRO18490] (1); RmlC-like jelly roll fold [IPRO14710] (1); Cyclic nucleotide-binding domain [IPRO00595] (1)                                                                                                                                                                                                                                                                                                                                                                                                                                                                                                                                                                | scaffold_9_mRNA_3712.1           | -                           | -                               |
| GF0033507 | 1                             | 0                        | 0                            | 0 Hypothetical protein (1)                                          |                                                                                                                                                                                                                                                              | Isopenicillin N synthase-like [IPRO27443] (1)                                                                                                                                                                                                                                                                                                                                                                                                                                                                                                                                                                                                                                                              | scaffold_9_mRNA_3701.1           | -                           | -                               |
| GF0033506 | 1                             | 0                        | 0                            | 0 Hypothetical protein (1)                                          |                                                                                                                                                                                                                                                              |                                                                                                                                                                                                                                                                                                                                                                                                                                                                                                                                                                                                                                                                                                            | scaffold_9_mRNA_3698.1           | -                           | -                               |
| GF0033505 | 1                             | 0                        | 0                            | 0 Cyclic nucleotide-gated ion channel, putative (1)                 |                                                                                                                                                                                                                                                              | RmlC-like jelly roll fold [IPRO14710] (1); Cyclic nucleotide-binding-like [IPRO18490] (1); Cyclic nucleotide-binding domain [IPRO00595] (1)                                                                                                                                                                                                                                                                                                                                                                                                                                                                                                                                                                | scaffold_9_mRNA_3697.1           | -                           | -                               |
| GF0033504 | 1                             | 0                        | 0                            | 0 Hypothetical protein (1)                                          | proteolysis [GO:0006508 biological_process] (1); cysteine-type peptidase activity [GO:008234 molecular_function] (1)                                                                                                                                         | Up1 protease family, C-terminal catalytic domain [IPRO03653] (1)                                                                                                                                                                                                                                                                                                                                                                                                                                                                                                                                                                                                                                           | scaffold_9_mRNA_3690.1           | -                           | -                               |
| GF0033503 | 1                             | 0                        | 0                            | 0 Cytokinin riboside 5'-monophosphate phosphoribosyltransferase (1) |                                                                                                                                                                                                                                                              | LOG family [IPRO31100] (1); Cytokinin riboside 5'-monophosphate phosphoribosyltransferase LOG [IPRO05269] (1)                                                                                                                                                                                                                                                                                                                                                                                                                                                                                                                                                                                              | scaffold_9_mRNA_3689.1           | -                           | -                               |
| GF0033502 | 1                             | 0                        | 0                            | 0 Hypothetical protein (1)                                          |                                                                                                                                                                                                                                                              | Domain of unknown function DUF1985 [IPRO15410] (1)                                                                                                                                                                                                                                                                                                                                                                                                                                                                                                                                                                                                                                                         | scaffold_9_mRNA_3688.1           | -                           | -                               |
| GF0033501 | 1                             | 0                        | 0                            | 0 Hypothetical protein (1)                                          |                                                                                                                                                                                                                                                              |                                                                                                                                                                                                                                                                                                                                                                                                                                                                                                                                                                                                                                                                                                            | scaffold_9_mRNA_3670.1           | -                           | -                               |
| GF0033500 | 1                             | 0                        | 0                            | 0 Hypothetical protein (1)                                          |                                                                                                                                                                                                                                                              |                                                                                                                                                                                                                                                                                                                                                                                                                                                                                                                                                                                                                                                                                                            | scaffold_9_mRNA_3662.1           | -                           | -                               |
| GF0033499 | 1                             | 0                        | 0                            | 0 Hypothetical protein (1)                                          |                                                                                                                                                                                                                                                              |                                                                                                                                                                                                                                                                                                                                                                                                                                                                                                                                                                                                                                                                                                            | scaffold_9_mRNA_3642.1           | -                           | -                               |
| GF0033498 | 1                             | 0                        | 0                            | 0 Hypothetical protein (1)                                          |                                                                                                                                                                                                                                                              | LOG family [IPRO31100] (1)                                                                                                                                                                                                                                                                                                                                                                                                                                                                                                                                                                                                                                                                                 | scaffold_9_mRNA_3641.1           | -                           | -                               |
| GF0033497 | 1                             | 0                        | 0                            | 0 Hypothetical protein (1)                                          | nucleic acid binding [GO:0003676 molecular_function] (1); RNA-DNA hybrid ribonuclease activity [GO:0004523 molecular_function] (1); DNA integration [GO:0015074 biological_process] (1)                                                                      | Retrotransposon gag domain [IPRO05162] (1); Integrase, catalytic core [IPRO01584] (1); Ribonuclease H-like domain [IPRO12337] (1); Ribonuclease H domain [IPRO02156] (1)                                                                                                                                                                                                                                                                                                                                                                                                                                                                                                                                   | scaffold_9_mRNA_3638.1           | -                           | -                               |
| GF0033496 | 1                             | 0                        | 0                            | 0 LRR receptor-like kinase family protein (1)                       | protein binding [GO:0005515 molecular_function] (1)                                                                                                                                                                                                          | Leucine-rich repeat, typical subtype [IPRO03591] (1); Leucine-rich repeat domain, L domain-like [IPRO32675] (1); Leucine-rich repeat [IPRO01611] (1); Leucine-rich repeat-containing N-terminal, plant-type [IPRO13210] (1)                                                                                                                                                                                                                                                                                                                                                                                                                                                                                | scaffold_9_mRNA_3636.1           | -                           | -                               |

| ID        | Num. in <i>C. clementinae</i> | Num. in <i>C. uchiha</i> | Num. in <i>P. trifoliata</i> | Note                                                                            | GO                                                                                                                                                                                                                                                                                                                 | InterPro                                                                                                                                                                                                                      | Members in <i>C. clementinae</i> | Members in <i>C. uchiha</i> | Members in <i>P. trifoliata</i> |
|-----------|-------------------------------|--------------------------|------------------------------|---------------------------------------------------------------------------------|--------------------------------------------------------------------------------------------------------------------------------------------------------------------------------------------------------------------------------------------------------------------------------------------------------------------|-------------------------------------------------------------------------------------------------------------------------------------------------------------------------------------------------------------------------------|----------------------------------|-----------------------------|---------------------------------|
| GF0033495 | 1                             | 0                        | 0                            | Anthocyanidin 5,3-O-glucosyltransferase (1)                                     | transferase activity, transferring hexosyl group [GO:0016758]<br>molecular_function (1); metabolic process [GO:0008152 biological_process] (1)                                                                                                                                                                     | UDP-glucuronosyl/UDP-glucosyltransferase [IPRO02213] (1)                                                                                                                                                                      | scaffold_9_mRNA_3634.1           | -                           | -                               |
| GF0033494 | 1                             | 0                        | 0                            | Hypothetical protein (1)                                                        |                                                                                                                                                                                                                                                                                                                    |                                                                                                                                                                                                                               | scaffold_9_mRNA_363.1            | -                           | -                               |
| GF0033493 | 1                             | 0                        | 0                            | Hypothetical protein (1)                                                        |                                                                                                                                                                                                                                                                                                                    | Retrotansposon gag domain [IPRO05162] (1); Aspartic peptidase domain [IPRO21109] (1)                                                                                                                                          | scaffold_9_mRNA_3619.1           | -                           | -                               |
| GF0033492 | 1                             | 0                        | 0                            | 3-isopropylmalate dehydratase large subunit (1)                                 |                                                                                                                                                                                                                                                                                                                    |                                                                                                                                                                                                                               | scaffold_9_mRNA_3594.1           | -                           | -                               |
| GF0033491 | 1                             | 0                        | 0                            | Hypothetical protein (1)                                                        | DNA binding [GO:0003677 molecular_function] (1)                                                                                                                                                                                                                                                                    | NAD(P)-binding domain [IPRO16040] (1); B3 DNA binding domain [IPRO03340] (1); Short-chain dehydrogenase/reductase SDR [IPRO02347] (1); DNA-binding pseudobarrel domain [IPRO15300] (1)                                        | scaffold_9_mRNA_3575.1           | -                           | -                               |
| GF0033490 | 1                             | 0                        | 0                            | Hypothetical protein (1)                                                        |                                                                                                                                                                                                                                                                                                                    | Gag-polyprotein of LTR copia-type [IPRO29472] (1)                                                                                                                                                                             | scaffold_9_mRNA_3567.1           | -                           | -                               |
| GF0033489 | 1                             | 0                        | 0                            | Hypothetical protein (1)                                                        | protein binding [GO:0005515 molecular_function] (1)                                                                                                                                                                                                                                                                | Leucine-rich repeat [IPRO01611] (1); Leucine-rich repeat domain, L domain-like [IPRO32675] (1)                                                                                                                                | scaffold_9_mRNA_3563.1           | -                           | -                               |
| GF0033488 | 1                             | 0                        | 0                            | Retinol dehydrogenase 14 (1)                                                    |                                                                                                                                                                                                                                                                                                                    | Short-chain dehydrogenase/reductase SDR [IPRO02347] (1); NAD(P)-binding domain [IPRO16040] (1)                                                                                                                                | scaffold_9_mRNA_3555.1           | -                           | -                               |
| GF0033487 | 1                             | 0                        | 0                            | Hypothetical protein (1)                                                        |                                                                                                                                                                                                                                                                                                                    |                                                                                                                                                                                                                               | scaffold_9_mRNA_3543.1           | -                           | -                               |
| GF0033486 | 1                             | 0                        | 0                            | Hypothetical protein (1)                                                        | zinc ion binding [GO:0008270 molecular_function] (1)                                                                                                                                                                                                                                                               | Zinc finger, GRF-type [IPRO10666] (1)                                                                                                                                                                                         | scaffold_9_mRNA_353.1            | -                           | -                               |
| GF0033485 | 1                             | 0                        | 0                            | Hypothetical protein (1)                                                        |                                                                                                                                                                                                                                                                                                                    |                                                                                                                                                                                                                               | scaffold_9_mRNA_3514.1           | -                           | -                               |
| GF0033484 | 1                             | 0                        | 0                            | Hypothetical protein (1)                                                        |                                                                                                                                                                                                                                                                                                                    |                                                                                                                                                                                                                               | scaffold_9_mRNA_3513.1           | -                           | -                               |
| GF0033483 | 1                             | 0                        | 0                            | Monosaccharide transport protein (1)                                            |                                                                                                                                                                                                                                                                                                                    |                                                                                                                                                                                                                               | scaffold_9_mRNA_3512.1           | -                           | -                               |
| GF0033482 | 1                             | 0                        | 0                            | Heavy metal-associated domain protein, putative (1)                             | metal ion binding [GO:0046872 molecular_function] (1); metal ion transport [GO:0039001 biological_process] (1)                                                                                                                                                                                                     | Heavy metal-associated domain, HMA [IPRO06121] (1)                                                                                                                                                                            | scaffold_9_mRNA_3510.1           | -                           | -                               |
| GF0033481 | 1                             | 0                        | 0                            | Hypothetical protein (1)                                                        | cysteine-type peptidase activity [GO:0008234 molecular_function] (1); proteolysis [GO:0006508 biological_process] (1)                                                                                                                                                                                              | Domain of unknown function DUF1985 [IPRO15410] (1); Ulp1 protease family, C-terminal catalytic domain [IPRO03653] (1)                                                                                                         | scaffold_9_mRNA_3493.1           | -                           | -                               |
| GF0033480 | 1                             | 0                        | 0                            | Hypothetical protein (1)                                                        | cysteine-type peptidase activity [GO:0008234 molecular_function] (1); proteolysis [GO:0006508 biological_process] (1)                                                                                                                                                                                              | Ulp1 protease family, C-terminal catalytic domain [IPRO03653] (1); Domain of unknown function DUF1985 [IPRO15410] (1)                                                                                                         | scaffold_9_mRNA_3484.1           | -                           | -                               |
| GF0033479 | 1                             | 0                        | 0                            | Hypothetical protein (1)                                                        |                                                                                                                                                                                                                                                                                                                    |                                                                                                                                                                                                                               | scaffold_9_mRNA_3436.1           | -                           | -                               |
| GF0033478 | 1                             | 0                        | 0                            | Hypothetical protein (1)                                                        | nucleic acid binding [GO:0003676 molecular_function] (1); zinc ion binding [GO:0008270 molecular_function] (1)                                                                                                                                                                                                     | Domain of unknown function DUF4283 [IPRO25558] (1); Zinc knuckle CXC2A4H3AC [IPRO02583] (1); Zinc finger, CCHC-type [IPRO01878] (1)                                                                                           | scaffold_9_mRNA_3427.1           | -                           | -                               |
| GF0033477 | 1                             | 0                        | 0                            | Putative non-LTR retroelement reverse transcriptase (1)                         | nucleic acid binding [GO:0003676 molecular_function] (1)                                                                                                                                                                                                                                                           | Ribonuclease H-like domain [IPRO12337] (1)                                                                                                                                                                                    | scaffold_9_mRNA_3426.1           | -                           | -                               |
| GF0033476 | 1                             | 0                        | 0                            | Gibberellin receptor GID1, putative (1)                                         | hydrolase activity [GO:0016787 molecular_function] (1); metabolic process [GO:0008152 biological_process] (1)                                                                                                                                                                                                      | Alpha/Beta hydrolase fold [IPRO29058] (1); Lipase, GDSL, putative histidine active site [IPRO02168] (1); Alpha/beta hydrolase fold-3 [IPRO13094] (1)                                                                          | scaffold_9_mRNA_3424.1           | -                           | -                               |
| GF0033475 | 1                             | 0                        | 0                            | Gibberellin receptor GID1, putative (1)                                         | hydrolase activity [GO:0016787 molecular_function] (1); metabolic process [GO:0008152 biological_process] (1)                                                                                                                                                                                                      | Alpha/Beta hydrolase fold [IPRO29058] (1); Alpha/beta hydrolase fold-3 [IPRO13094] (1)                                                                                                                                        | scaffold_9_mRNA_3423.1           | -                           | -                               |
| GF0033474 | 1                             | 0                        | 0                            | Proline-rich receptor-like protein kinase PERK15 (1)                            | protein phosphorylation [GO:0006468 biological_process] (1); protein kinase activity [GO:0004672 molecular_function] (1); ATP binding [GO:0005524 molecular_function] (1)                                                                                                                                          | Protein kinase domain [IPRO00719] (1); Protein kinase-like domain [IPRO01009] (1); Serine/threonine/protein kinase, catalytic domain [IPRO01245] (1)                                                                          | scaffold_9_mRNA_342.1            | -                           | -                               |
| GF0033473 | 1                             | 0                        | 0                            | Basic helix-loop-helix DNA-binding superfamily protein, putative (1)            | DNA binding [GO:0003677 molecular_function] (1); protein dimerization activity [GO:0046983 molecular_function] (1)                                                                                                                                                                                                 | Achate-scute transcription factor-related [IPRO15660] (1); Myc-type, basic helix-loop-helix (bHLH) domain [IPRO11598] (1)                                                                                                     | scaffold_9_mRNA_3415.1           | -                           | -                               |
| GF0033472 | 1                             | 0                        | 0                            | Monosaccharide transport protein (1)                                            |                                                                                                                                                                                                                                                                                                                    |                                                                                                                                                                                                                               | scaffold_9_mRNA_3410.1           | -                           | -                               |
| GF0033471 | 1                             | 0                        | 0                            | Hypothetical protein (1)                                                        | RNA-DNA hybrid ribonuclease activity [GO:0004523 molecular_function] (1); nucleic acid binding [GO:0003676 molecular_function] (1)                                                                                                                                                                                 | Ribonuclease H domain [IPRO02156] (1); Ribonuclease H-like domain [IPRO12337] (1); Domain of unknown function DUF4283 [IPRO25558] (1)                                                                                         | scaffold_9_mRNA_3402.1           | -                           | -                               |
| GF0033470 | 1                             | 0                        | 0                            | Hypothetical protein (1)                                                        |                                                                                                                                                                                                                                                                                                                    |                                                                                                                                                                                                                               | scaffold_9_mRNA_3400.1           | -                           | -                               |
| GF0033469 | 1                             | 0                        | 0                            | Hypothetical protein (1)                                                        | zinc ion binding [GO:0008270 molecular_function] (1); DNA binding [GO:0003677 molecular_function] (1)                                                                                                                                                                                                              | Zinc finger, A20-type [IPRO02653] (1); Zinc finger, AN1-type [IPRO00058] (1); Eukaryotic rRNA processing [IPRO08610] (1)                                                                                                      | scaffold_9_mRNA_3381.1           | -                           | -                               |
| GF0033468 | 1                             | 0                        | 0                            | Hypothetical protein (1)                                                        |                                                                                                                                                                                                                                                                                                                    |                                                                                                                                                                                                                               | scaffold_9_mRNA_3366.1           | -                           | -                               |
| GF0033467 | 1                             | 0                        | 0                            | Hypothetical protein (1)                                                        |                                                                                                                                                                                                                                                                                                                    |                                                                                                                                                                                                                               | scaffold_9_mRNA_336.1            | -                           | -                               |
| GF0033466 | 1                             | 0                        | 0                            | Hypothetical protein (1)                                                        |                                                                                                                                                                                                                                                                                                                    |                                                                                                                                                                                                                               | scaffold_9_mRNA_3358.1           | -                           | -                               |
| GF0033465 | 1                             | 0                        | 0                            | Hypothetical protein (1)                                                        |                                                                                                                                                                                                                                                                                                                    |                                                                                                                                                                                                                               | scaffold_9_mRNA_3356.1           | -                           | -                               |
| GF0033464 | 1                             | 0                        | 0                            | Hypothetical protein (1)                                                        | iron ion binding [GO:0005506 molecular_function] (1); heme binding [GO:0020037 molecular_function] (1); oxidation-reduction process [GO:0055114 biological_process] (1); oxidoreductase activity, acting on paired donors, with incorporation or reduction of molecular oxygen [GO:0016705 molecular_function] (1) | Cytochrome P450 [IPRO01128] (1)                                                                                                                                                                                               | scaffold_9_mRNA_3355.1           | -                           | -                               |
| GF0033463 | 1                             | 0                        | 0                            | Hypothetical protein (1)                                                        |                                                                                                                                                                                                                                                                                                                    |                                                                                                                                                                                                                               | scaffold_9_mRNA_3354.1           | -                           | -                               |
| GF0033462 | 1                             | 0                        | 0                            | Hypothetical protein (1)                                                        |                                                                                                                                                                                                                                                                                                                    |                                                                                                                                                                                                                               | scaffold_9_mRNA_3334.1           | -                           | -                               |
| GF0033461 | 1                             | 0                        | 0                            | Hypothetical protein (1)                                                        |                                                                                                                                                                                                                                                                                                                    |                                                                                                                                                                                                                               | scaffold_9_mRNA_3333.1           | -                           | -                               |
| GF0033460 | 1                             | 0                        | 0                            | Hypothetical protein (1)                                                        | enzyme inhibitor activity [GO:0004857 molecular_function] (1)                                                                                                                                                                                                                                                      | Pectinesterase inhibitor domain [IPRO06501] (1)                                                                                                                                                                               | scaffold_9_mRNA_3330.1           | -                           | -                               |
| GF0033459 | 1                             | 0                        | 0                            | Hypothetical protein (1)                                                        |                                                                                                                                                                                                                                                                                                                    |                                                                                                                                                                                                                               | scaffold_9_mRNA_3328.1           | -                           | -                               |
| GF0033458 | 1                             | 0                        | 0                            | Heat stress transcription factor B-2b (1)                                       |                                                                                                                                                                                                                                                                                                                    | Heat shock transcription factor family [IPRO27725] (1)                                                                                                                                                                        | scaffold_9_mRNA_3322.1           | -                           | -                               |
| GF0033457 | 1                             | 0                        | 0                            | Hypothetical protein (1)                                                        |                                                                                                                                                                                                                                                                                                                    | Protein of unknown function DUF594 [IPRO07658] (1)                                                                                                                                                                            | scaffold_9_mRNA_3318.1           | -                           | -                               |
| GF0033456 | 1                             | 0                        | 0                            | Hypothetical protein (1)                                                        |                                                                                                                                                                                                                                                                                                                    |                                                                                                                                                                                                                               | scaffold_9_mRNA_3317.1           | -                           | -                               |
| GF0033455 | 1                             | 0                        | 0                            | DUF1680 domain protein (1)                                                      | alpha-L-arabinofuranosidase activity [GO:0004656 molecular_function] (1); L-arabinose metabolic process [GO:0046373 biological_process] (1)                                                                                                                                                                        | Beta-L-arabinofuranosidase, GH127 [IPRO12878] (1); Alpha-L-arabinofuranosidase B, arabinose-binding domain [IPRO1934] (1)                                                                                                     | scaffold_9_mRNA_3316.1           | -                           | -                               |
| GF0033454 | 1                             | 0                        | 0                            | Cytokinin riboside 5'-monophosphate phosphoribidylase (1)                       |                                                                                                                                                                                                                                                                                                                    | LOG family [IPRO31100] (1)                                                                                                                                                                                                    | scaffold_9_mRNA_3307.1           | -                           | -                               |
| GF0033453 | 1                             | 0                        | 0                            | Hypothetical protein (1)                                                        |                                                                                                                                                                                                                                                                                                                    |                                                                                                                                                                                                                               | scaffold_9_mRNA_3306.1           | -                           | -                               |
| GF0033452 | 1                             | 0                        | 0                            | Hypothetical protein (1)                                                        |                                                                                                                                                                                                                                                                                                                    |                                                                                                                                                                                                                               | scaffold_9_mRNA_3303.1           | -                           | -                               |
| GF0033451 | 1                             | 0                        | 0                            | Hypothetical protein (1)                                                        |                                                                                                                                                                                                                                                                                                                    |                                                                                                                                                                                                                               | scaffold_9_mRNA_3301.1           | -                           | -                               |
| GF0033450 | 1                             | 0                        | 0                            | Hypothetical protein (1)                                                        |                                                                                                                                                                                                                                                                                                                    |                                                                                                                                                                                                                               | scaffold_9_mRNA_3300.1           | -                           | -                               |
| GF0033449 | 1                             | 0                        | 0                            | Oxidoreductase 2-oxoglutarate-iron(II)-dependent oxygenase (1)                  | oxidoreductase activity [GO:0016491 molecular_function] (1); oxidation-reduction process [GO:0055114 biological_process] (1)                                                                                                                                                                                       | Isopenicillin N synthase-like [IPRO27443] (1); Oxoglutarate/iron-dependent dioxygenase [IPRO05123] (1)                                                                                                                        | scaffold_9_mRNA_3299.1           | -                           | -                               |
| GF0033448 | 1                             | 0                        | 0                            | Hypothetical protein (1)                                                        | oxidoreductase activity [GO:0016491 molecular_function] (1); oxidation-reduction process [GO:0055114 biological_process] (1)                                                                                                                                                                                       | Isopenicillin N synthase-like [IPRO27443] (1); Non-haem dioxygenase N-terminal domain [IPRO26992] (1); Oxoglutarate/iron-dependent dioxygenase [IPRO05123] (1)                                                                | scaffold_9_mRNA_3296.1           | -                           | -                               |
| GF0033447 | 1                             | 0                        | 0                            | Wall-associated receptor kinase-like 9 (1)                                      | ATP binding [GO:0005524 molecular_function] (1); protein kinase activity [GO:0004672 molecular_function] (1); protein phosphorylation [GO:0006468 biological_process] (1)                                                                                                                                          | Protein kinase-like domain [IPRO11009] (1); Protein kinase domain [IPRO00719] (1); Serine/threonine/protein kinase, active site [IPRO08271] (1)                                                                               | scaffold_9_mRNA_3295.1           | -                           | -                               |
| GF0033446 | 1                             | 0                        | 0                            | 2-oxoglutarate and Fe(II)-dependent oxygenase superfamily protein, putative (1) | oxidoreductase activity [GO:0016491 molecular_function] (1); oxidation-reduction process [GO:0055114 biological_process] (1)                                                                                                                                                                                       | Oxoglutarate/iron-dependent dioxygenase [IPRO05123] (1); Isopenicillin N synthase-like [IPRO27443] (1); Non-haem dioxygenase N-terminal domain [IPRO26992] (1)                                                                | scaffold_9_mRNA_3294.1           | -                           | -                               |
| GF0033445 | 1                             | 0                        | 0                            | Hypothetical protein (1)                                                        |                                                                                                                                                                                                                                                                                                                    |                                                                                                                                                                                                                               | scaffold_9_mRNA_3288.1           | -                           | -                               |
| GF0033444 | 1                             | 0                        | 0                            | Hypothetical protein (1)                                                        |                                                                                                                                                                                                                                                                                                                    |                                                                                                                                                                                                                               | scaffold_9_mRNA_3283.1           | -                           | -                               |
| GF0033443 | 1                             | 0                        | 0                            | Hypothetical protein (1)                                                        | protein kinase activity [GO:0004672 molecular_function] (1); protein phosphorylation [GO:0006468 biological_process] (1); polysaccharide binding [GO:0030247 molecular_function] (1); ATP binding [GO:0005524 molecular_function] (1)                                                                              | Serine/threonine-protein kinase, active site [IPRO08271] (1); Protein kinase-like domain [IPRO11009] (1); Wall-associated receptor kinase, galacturonan-binding domain [IPRO25287] (1); Protein kinase domain [IPRO00719] (1) | scaffold_9_mRNA_3281.1           | -                           | -                               |
| GF0033442 | 1                             | 0                        | 0                            | Hypothetical protein (1)                                                        |                                                                                                                                                                                                                                                                                                                    |                                                                                                                                                                                                                               | scaffold_9_mRNA_3280.1           | -                           | -                               |
| GF0033441 | 1                             | 0                        | 0                            | Hypothetical protein (1)                                                        |                                                                                                                                                                                                                                                                                                                    | Nucleic acid-binding, OB-fold [IPRO12340] (1)                                                                                                                                                                                 | scaffold_9_mRNA_3277.1           | -                           | -                               |
| GF0033440 | 1                             | 0                        | 0                            | Hypothetical protein (1)                                                        |                                                                                                                                                                                                                                                                                                                    |                                                                                                                                                                                                                               | scaffold_9_mRNA_3271.1           | -                           | -                               |
| GF0033439 | 1                             | 0                        | 0                            | Hypothetical protein (1)                                                        |                                                                                                                                                                                                                                                                                                                    |                                                                                                                                                                                                                               | scaffold_9_mRNA_3260.1           | -                           | -                               |

| ID        | Num. in <i>C. clementiae</i> | Num. in <i>C. uchiha</i> | Num. in <i>P. trifoliate</i> | Note                                                         | GO                                                                                                                                                                                                                                                                                                                                                                                                                                                                                                               | InterPro                                                                                                                                                                                                       | Members in <i>C. clementiae</i> | Members in <i>C. uchiha</i> | Members in <i>P. trifoliate</i> |
|-----------|------------------------------|--------------------------|------------------------------|--------------------------------------------------------------|------------------------------------------------------------------------------------------------------------------------------------------------------------------------------------------------------------------------------------------------------------------------------------------------------------------------------------------------------------------------------------------------------------------------------------------------------------------------------------------------------------------|----------------------------------------------------------------------------------------------------------------------------------------------------------------------------------------------------------------|---------------------------------|-----------------------------|---------------------------------|
| GF0033438 | 1                            | 0                        | 0                            | Anthocyanin 5-aromatic acyltransferase (1)                   | transferase activity, transferring acyl groups other than amino-acyl groups [GO:0016747 molecular_function] (1)                                                                                                                                                                                                                                                                                                                                                                                                  | Transferase [IPR003480] (1)                                                                                                                                                                                    | scaffold_9_mRNA_3249.1          | -                           | -                               |
| GF0033437 | 1                            | 0                        | 0                            | Hypothetical protein (1)                                     |                                                                                                                                                                                                                                                                                                                                                                                                                                                                                                                  |                                                                                                                                                                                                                | scaffold_9_mRNA_3248.1          | -                           | -                               |
| GF0033436 | 1                            | 0                        | 0                            | Cytokinin riboside 5'-monophosphate phosphoribohydrolase (1) |                                                                                                                                                                                                                                                                                                                                                                                                                                                                                                                  | LOG family [IPR031100] (1)                                                                                                                                                                                     | scaffold_9_mRNA_3246.1          | -                           | -                               |
| GF0033435 | 1                            | 0                        | 0                            | Hypothetical protein (1)                                     |                                                                                                                                                                                                                                                                                                                                                                                                                                                                                                                  | Retrotransposon gag domain [IPR005162] (1)                                                                                                                                                                     | scaffold_9_mRNA_3244.1          | -                           | -                               |
| GF0033434 | 1                            | 0                        | 0                            | Hypothetical protein (1)                                     |                                                                                                                                                                                                                                                                                                                                                                                                                                                                                                                  |                                                                                                                                                                                                                | scaffold_9_mRNA_323.1           | -                           | -                               |
| GF0033433 | 1                            | 0                        | 0                            | Hypothetical protein (1)                                     | ATPase activity [GO:0016887 molecular_function] (1); ATP binding [GO:0005524 molecular_function] (1); transporter activity [GO:0005215 molecular_function] (1); transmembrane transport [GO:0055085 biological_process] (1); substrate-specific transmembrane transporter activity [GO:0022891 molecular_function] (1); integral component of membrane [GO:0016021 cellular_component] (1); transmembrane transporter activity [GO:0022857 molecular_function] (1); membrane [GO:0016020 cellular_component] (1) | ABC transporter-like [IPR003439] (1); P-loop containing nucleoside triphosphate hydrolase [IPR027417] (1)                                                                                                      | scaffold_9_mRNA_3228.1          | -                           | -                               |
| GF0033432 | 1                            | 0                        | 0                            | Hypothetical protein (1)                                     |                                                                                                                                                                                                                                                                                                                                                                                                                                                                                                                  | Sugar/inositol transporter [IPR003663] (1); Major facilitator, sugar transporter-like [IPR005828] (1); Major facilitator superfamily domain [IPR020846] (1); Sugar transporter, conserved site [IPR005829] (1) | scaffold_9_mRNA_3218.1          | -                           | -                               |
| GF0033431 | 1                            | 0                        | 0                            | Hypothetical protein (1)                                     | nucleic acid binding [GO:0003676 molecular_function] (1)                                                                                                                                                                                                                                                                                                                                                                                                                                                         | Ribonuclease H-like domain [IPR012337] (1); Domain of unknown function DUF4283 [IPR025558] (1)                                                                                                                 | scaffold_9_mRNA_3214.1          | -                           | -                               |
| GF0033430 | 1                            | 0                        | 0                            | Hypothetical protein (1)                                     | transporter activity [GO:0005215 molecular_function] (1); transmembrane transport [GO:0055085 biological_process] (1); substrate-specific transmembrane transporter activity [GO:0022891 molecular_function] (1); integral component of membrane [GO:0016021 cellular_component] (1); transmembrane transporter activity [GO:0022857 molecular_function] (1); membrane [GO:0016020 cellular_component] (1)                                                                                                       | Sugar/inositol transporter [IPR003663] (1); Major facilitator, sugar transporter-like [IPR005828] (1); Major facilitator superfamily domain [IPR020846] (1); Sugar transporter, conserved site [IPR005829] (1) | scaffold_9_mRNA_3211.1          | -                           | -                               |
| GF0033429 | 1                            | 0                        | 0                            | Retrotransposon protein, putative, unclassified (1)          |                                                                                                                                                                                                                                                                                                                                                                                                                                                                                                                  | Aspartic peptidase domain [IPR021109] (1)                                                                                                                                                                      | scaffold_9_mRNA_3210.1          | -                           | -                               |
| GF0033428 | 1                            | 0                        | 0                            | Hypothetical protein (1)                                     |                                                                                                                                                                                                                                                                                                                                                                                                                                                                                                                  |                                                                                                                                                                                                                | scaffold_9_mRNA_321.1           | -                           | -                               |
| GF0033427 | 1                            | 0                        | 0                            | Hexose carrier protein HEX6 (1)                              | integral component of membrane [GO:0016021 cellular_component] (1); substrate-specific transmembrane transporter activity [GO:0022891 molecular_function] (1); membrane [GO:0016020 cellular_component] (1); transmembrane transporter activity [GO:0022857 molecular_function] (1); transmembrane transport [GO:0055085 biological_process] (1)                                                                                                                                                                 | Major facilitator, sugar transporter-like [IPR005828] (1); Sugar/inositol transporter [IPR003663] (1); Major facilitator superfamily domain [IPR020846] (1)                                                    | scaffold_9_mRNA_3207.1          | -                           | -                               |
| GF0033426 | 1                            | 0                        | 0                            | DUF4283 domain protein (1)                                   |                                                                                                                                                                                                                                                                                                                                                                                                                                                                                                                  | Domain of unknown function DUF4283 [IPR025558] (1)                                                                                                                                                             | scaffold_9_mRNA_3206.1          | -                           | -                               |
| GF0033425 | 1                            | 0                        | 0                            | Hypothetical protein (1)                                     |                                                                                                                                                                                                                                                                                                                                                                                                                                                                                                                  |                                                                                                                                                                                                                | scaffold_9_mRNA_3194.1          | -                           | -                               |
| GF0033424 | 1                            | 0                        | 0                            | Hypothetical protein (1)                                     |                                                                                                                                                                                                                                                                                                                                                                                                                                                                                                                  | Aspartic peptidase domain [IPR021109] (1)                                                                                                                                                                      | scaffold_9_mRNA_3190.1          | -                           | -                               |
| GF0033423 | 1                            | 0                        | 0                            | Hypothetical protein (1)                                     |                                                                                                                                                                                                                                                                                                                                                                                                                                                                                                                  |                                                                                                                                                                                                                | scaffold_9_mRNA_3189.1          | -                           | -                               |
| GF0033422 | 1                            | 0                        | 0                            | Hypothetical protein (1)                                     |                                                                                                                                                                                                                                                                                                                                                                                                                                                                                                                  |                                                                                                                                                                                                                | scaffold_9_mRNA_3188.1          | -                           | -                               |
| GF0033421 | 1                            | 0                        | 0                            | Cytokinin riboside 5'-monophosphate phosphoribohydrolase (1) |                                                                                                                                                                                                                                                                                                                                                                                                                                                                                                                  | LOG family [IPR031100] (1)                                                                                                                                                                                     | scaffold_9_mRNA_3187.1          | -                           | -                               |
| GF0033420 | 1                            | 0                        | 0                            | Hypothetical protein (1)                                     |                                                                                                                                                                                                                                                                                                                                                                                                                                                                                                                  | Tubulin/FtsZ, 2-layer sandwich domain [IPR018316] (1)                                                                                                                                                          | scaffold_9_mRNA_3185.1          | -                           | -                               |
| GF0033419 | 1                            | 0                        | 0                            | Proteinase inhibitor (1)                                     | response to wounding [GO:0009611 biological_process] (1); serine-type endopeptidase inhibitor activity [GO:0004867 molecular_function] (1)                                                                                                                                                                                                                                                                                                                                                                       | Proteinase inhibitor I13, potato inhibitor 1 [IPR000864] (1)                                                                                                                                                   | scaffold_9_mRNA_3184.1          | -                           | -                               |
| GF0033418 | 1                            | 0                        | 0                            | Hypothetical protein (1)                                     |                                                                                                                                                                                                                                                                                                                                                                                                                                                                                                                  |                                                                                                                                                                                                                | scaffold_9_mRNA_3177.1          | -                           | -                               |
| GF0033417 | 1                            | 0                        | 0                            | Hypothetical protein (1)                                     |                                                                                                                                                                                                                                                                                                                                                                                                                                                                                                                  | Retrotransposon gag domain [IPR005162] (1); Aspartic peptidase domain [IPR021109] (1)                                                                                                                          | scaffold_9_mRNA_3173.1          | -                           | -                               |
| GF0033416 | 1                            | 0                        | 0                            | Hypothetical protein (1)                                     |                                                                                                                                                                                                                                                                                                                                                                                                                                                                                                                  |                                                                                                                                                                                                                | scaffold_9_mRNA_3172.1          | -                           | -                               |
| GF0033415 | 1                            | 0                        | 0                            | Hypothetical protein (1)                                     |                                                                                                                                                                                                                                                                                                                                                                                                                                                                                                                  |                                                                                                                                                                                                                | scaffold_9_mRNA_3165.1          | -                           | -                               |
| GF0033414 | 1                            | 0                        | 0                            | Hypothetical protein (1)                                     |                                                                                                                                                                                                                                                                                                                                                                                                                                                                                                                  |                                                                                                                                                                                                                | scaffold_9_mRNA_3159.1          | -                           | -                               |
| GF0033413 | 1                            | 0                        | 0                            | Hypothetical protein (1)                                     |                                                                                                                                                                                                                                                                                                                                                                                                                                                                                                                  | Ankyrin repeat-containing domain [IPR020683] (1)                                                                                                                                                               | scaffold_9_mRNA_3156.1          | -                           | -                               |
| GF0033412 | 1                            | 0                        | 0                            | Ankyrin repeat family protein, putative                      | protein binding [GO:0005515 molecular_function] (1)                                                                                                                                                                                                                                                                                                                                                                                                                                                              | Ankyrin repeat [IPR002110] (1); Ankyrin repeat-containing domain [IPR020683] (1)                                                                                                                               | scaffold_9_mRNA_3155.1          | -                           | -                               |
| GF0033411 | 1                            | 0                        | 0                            | Hypothetical protein (1)                                     |                                                                                                                                                                                                                                                                                                                                                                                                                                                                                                                  |                                                                                                                                                                                                                | scaffold_9_mRNA_3149.1          | -                           | -                               |
| GF0033410 | 1                            | 0                        | 0                            | Hypothetical protein (1)                                     |                                                                                                                                                                                                                                                                                                                                                                                                                                                                                                                  | Transposase, MuDR, plant [IPR004332] (1)                                                                                                                                                                       | scaffold_9_mRNA_3145.1          | -                           | -                               |
| GF0033409 | 1                            | 0                        | 0                            | Hypothetical protein (1)                                     |                                                                                                                                                                                                                                                                                                                                                                                                                                                                                                                  |                                                                                                                                                                                                                | scaffold_9_mRNA_3141.1          | -                           | -                               |
| GF0033408 | 1                            | 0                        | 0                            | F-box protein At5g07610 (1)                                  | protein binding [GO:0005515 molecular_function] (1)                                                                                                                                                                                                                                                                                                                                                                                                                                                              | F-box associated interaction domain [IPR017451] (1); F-box domain [IPR001810] (1); Kelch-type beta propeller [IPR015915] (1)                                                                                   | scaffold_9_mRNA_3138.1          | -                           | -                               |
| GF0033407 | 1                            | 0                        | 0                            | Mutator-like transposase (1)                                 | zinc ion binding [GO:0008270 molecular_function] (1)                                                                                                                                                                                                                                                                                                                                                                                                                                                             | Zinc finger, SWIM-type [IPR007527] (1); Transposase, MuDR, plant [IPR004332] (1); Zinc finger, PMZ-type [IPR006564] (1); MULE transposase domain [IPR018289] (1)                                               | scaffold_9_mRNA_3131.1          | -                           | -                               |
| GF0033406 | 1                            | 0                        | 0                            | Serine esterase family protein (1)                           |                                                                                                                                                                                                                                                                                                                                                                                                                                                                                                                  | Domain of unknown function DUF676, lipase-like [IPR007751] (1); Alpha/Beta hydrolase fold [IPR029058] (1)                                                                                                      | scaffold_9_mRNA_3130.1          | -                           | -                               |
| GF0033405 | 1                            | 0                        | 0                            | Mavicyamin (1)                                               | electron carrier activity [GO:0000955 molecular_function] (1)                                                                                                                                                                                                                                                                                                                                                                                                                                                    | Blue (type 1) copper protein, binding site [IPR028871] (1); Phytocyanin domain [IPR003245] (1); Cupredoxin [IPR008972] (1)                                                                                     | scaffold_9_mRNA_3123.1          | -                           | -                               |
| GF0033404 | 1                            | 0                        | 0                            | Hypothetical protein (1)                                     |                                                                                                                                                                                                                                                                                                                                                                                                                                                                                                                  |                                                                                                                                                                                                                | scaffold_9_mRNA_3122.1          | -                           | -                               |
| GF0033403 | 1                            | 0                        | 0                            | Hypothetical protein (1)                                     | electron carrier activity [GO:0000955 molecular_function] (1)                                                                                                                                                                                                                                                                                                                                                                                                                                                    | Cupredoxin [IPR008972] (1); Blue (type 1) copper protein, binding site [IPR028871] (1); Phytocyanin domain [IPR003245] (1)                                                                                     | scaffold_9_mRNA_3121.1          | -                           | -                               |
| GF0033402 | 1                            | 0                        | 0                            | Hypothetical protein (1)                                     |                                                                                                                                                                                                                                                                                                                                                                                                                                                                                                                  |                                                                                                                                                                                                                | scaffold_9_mRNA_3110.1          | -                           | -                               |
| GF0033401 | 1                            | 0                        | 0                            | Hypothetical protein (1)                                     |                                                                                                                                                                                                                                                                                                                                                                                                                                                                                                                  |                                                                                                                                                                                                                | scaffold_9_mRNA_3107.1          | -                           | -                               |
| GF0033400 | 1                            | 0                        | 0                            | Glutaredoxin (1)                                             | electron carrier activity [GO:0000955 molecular_function] (1); cell redox homeostasis [GO:0045454 biological_process] (1); protein disulfide oxidoreductase activity [GO:0015035 molecular_function] (1)                                                                                                                                                                                                                                                                                                         | Glutaredoxin subgroup [IPR014025] (1); Glutaredoxin [IPR002109] (1); Glutaredoxin, eukaryotic/viral [IPR011899] (1); Thioredoxin-like fold [IPR012336] (1)                                                     | scaffold_9_mRNA_3094.1          | -                           | -                               |
| GF0033399 | 1                            | 0                        | 0                            | Hypothetical protein (1)                                     | DNA ligase activity [GO:0003909 molecular_function] (1); DNA ligation involved in DNA repair [GO:0051103 biological_process] (1)                                                                                                                                                                                                                                                                                                                                                                                 | Domain of unknown function DUF4283 [IPR025558] (1); DNA ligase, ATP-dependent, conserved site [IPR016059] (1)                                                                                                  | scaffold_9_mRNA_3089.1          | -                           | -                               |
| GF0033398 | 1                            | 0                        | 0                            | Protein SRC2 (1)                                             | protein binding [GO:0005515 molecular_function] (1)                                                                                                                                                                                                                                                                                                                                                                                                                                                              | C2 domain [IPR000008] (1)                                                                                                                                                                                      | scaffold_9_mRNA_308.1           | -                           | -                               |
| GF0033397 | 1                            | 0                        | 0                            | Hypothetical protein (1)                                     |                                                                                                                                                                                                                                                                                                                                                                                                                                                                                                                  | Aspartic peptidase domain [IPR021109] (1)                                                                                                                                                                      | scaffold_9_mRNA_3079.1          | -                           | -                               |
| GF0033396 | 1                            | 0                        | 0                            | Hypothetical protein (1)                                     |                                                                                                                                                                                                                                                                                                                                                                                                                                                                                                                  |                                                                                                                                                                                                                | scaffold_9_mRNA_3066.1          | -                           | -                               |
| GF0033395 | 1                            | 0                        | 0                            | Glycoside hydrolase family 28 protein (1)                    | carbohydrate metabolic process [GO:0005975 biological_process] (1); polygalacturonase activity [GO:0004650 molecular_function] (1)                                                                                                                                                                                                                                                                                                                                                                               | Pectin lyase fold [IPR012334] (1); Pectin lyase fold virulence factor [IPR011050] (1); Glycoside hydrolase, family 28 [IPR000743] (1)                                                                          | scaffold_9_mRNA_3063.1          | -                           | -                               |
| GF0033394 | 1                            | 0                        | 0                            | Hypothetical protein (1)                                     |                                                                                                                                                                                                                                                                                                                                                                                                                                                                                                                  |                                                                                                                                                                                                                | scaffold_9_mRNA_3055.1          | -                           | -                               |
| GF0033393 | 1                            | 0                        | 0                            | Hypothetical protein (1)                                     |                                                                                                                                                                                                                                                                                                                                                                                                                                                                                                                  |                                                                                                                                                                                                                | scaffold_9_mRNA_3048.1          | -                           | -                               |
| GF0033392 | 1                            | 0                        | 0                            | Non-LTR retroelement reverse transcriptase (1)               | nucleic acid binding [GO:0003676 molecular_function] (1)                                                                                                                                                                                                                                                                                                                                                                                                                                                         | Ribonuclease H-like domain [IPR012337] (1); Reverse transcriptase zinc-binding domain [IPR026960] (1); TB2/DP1/HV A22-related protein [IPR004345] (1)                                                          | scaffold_9_mRNA_3040.1          | -                           | -                               |
| GF0033391 | 1                            | 0                        | 0                            | Hypothetical protein (1)                                     |                                                                                                                                                                                                                                                                                                                                                                                                                                                                                                                  |                                                                                                                                                                                                                | scaffold_9_mRNA_3032.1          | -                           | -                               |
| GF0033390 | 1                            | 0                        | 0                            | Hypothetical protein (1)                                     |                                                                                                                                                                                                                                                                                                                                                                                                                                                                                                                  |                                                                                                                                                                                                                | scaffold_9_mRNA_3030.1          | -                           | -                               |
| GF0033389 | 1                            | 0                        | 0                            | Hypothetical protein (1)                                     |                                                                                                                                                                                                                                                                                                                                                                                                                                                                                                                  |                                                                                                                                                                                                                | scaffold_9_mRNA_3028.1          | -                           | -                               |
| GF0033388 | 1                            | 0                        | 0                            | Hypothetical protein (1)                                     |                                                                                                                                                                                                                                                                                                                                                                                                                                                                                                                  |                                                                                                                                                                                                                | scaffold_9_mRNA_3027.1          | -                           | -                               |
| GF0033387 | 1                            | 0                        | 0                            | Hypothetical protein (1)                                     |                                                                                                                                                                                                                                                                                                                                                                                                                                                                                                                  |                                                                                                                                                                                                                | scaffold_9_mRNA_3019.1          | -                           | -                               |
| GF0033386 | 1                            | 0                        | 0                            | Hypothetical protein (1)                                     |                                                                                                                                                                                                                                                                                                                                                                                                                                                                                                                  |                                                                                                                                                                                                                | scaffold_9_mRNA_3015.1          | -                           | -                               |
| GF0033385 | 1                            | 0                        | 0                            | Hypothetical protein (1)                                     |                                                                                                                                                                                                                                                                                                                                                                                                                                                                                                                  |                                                                                                                                                                                                                | scaffold_9_mRNA_3008.1          | -                           | -                               |
| GF0033384 | 1                            | 0                        | 0                            | Hypothetical protein (1)                                     |                                                                                                                                                                                                                                                                                                                                                                                                                                                                                                                  | Aspartic peptidase domain [IPR021109] (1)                                                                                                                                                                      | scaffold_9_mRNA_2999.1          | -                           | -                               |
| GF0033383 | 1                            | 0                        | 0                            | Hypothetical protein (1)                                     |                                                                                                                                                                                                                                                                                                                                                                                                                                                                                                                  |                                                                                                                                                                                                                | scaffold_9_mRNA_2997.1          | -                           | -                               |
| GF0033382 | 1                            | 0                        | 0                            | Hypothetical protein (1)                                     |                                                                                                                                                                                                                                                                                                                                                                                                                                                                                                                  |                                                                                                                                                                                                                | scaffold_9_mRNA_2985.1          | -                           | -                               |

| ID        | Num. in <i>C. celerantiae</i> | Num. in <i>C. uchiha</i> | Num. in <i>P. trifoliata</i> | Note                                                            | GO                                                                                                                                                                                                                                                                                                                                                                                    | InterPro                                                                                                                                                                                                                                                                                                                                                                                                                     | Members in <i>C. celerantiae</i> | Members in <i>C. uchiha</i> | Members in <i>P. trifoliata</i> |
|-----------|-------------------------------|--------------------------|------------------------------|-----------------------------------------------------------------|---------------------------------------------------------------------------------------------------------------------------------------------------------------------------------------------------------------------------------------------------------------------------------------------------------------------------------------------------------------------------------------|------------------------------------------------------------------------------------------------------------------------------------------------------------------------------------------------------------------------------------------------------------------------------------------------------------------------------------------------------------------------------------------------------------------------------|----------------------------------|-----------------------------|---------------------------------|
| GF0033381 | 1                             | 0                        | 0                            | 0 DUF642 family protein (1)                                     |                                                                                                                                                                                                                                                                                                                                                                                       | Domain of unknown function DUF642 [IPR060946] (1); Galactose-binding domain-like [IPR08979] (1)                                                                                                                                                                                                                                                                                                                              | scaffold_9_mRNA_2982.1           | -                           | -                               |
| GF0033380 | 1                             | 0                        | 0                            | 0 Hypothetical protein (1)                                      | nucleic acid binding [GO:0003676 molecular_function] (1)                                                                                                                                                                                                                                                                                                                              | Ribonuclease H-like domain [IPR012337] (1)                                                                                                                                                                                                                                                                                                                                                                                   | scaffold_9_mRNA_2981.1           | -                           | -                               |
| GF0033379 | 1                             | 0                        | 0                            | 0 Hypothetical protein (1)                                      |                                                                                                                                                                                                                                                                                                                                                                                       | Reverse transcriptase domain [IPR00477] (1)                                                                                                                                                                                                                                                                                                                                                                                  | scaffold_9_mRNA_2979.1           | -                           | -                               |
| GF0033378 | 1                             | 0                        | 0                            | 0 Hypothetical protein (1)                                      |                                                                                                                                                                                                                                                                                                                                                                                       |                                                                                                                                                                                                                                                                                                                                                                                                                              | scaffold_9_mRNA_2978.1           | -                           | -                               |
| GF0033377 | 1                             | 0                        | 0                            | 0 Hypothetical protein (1)                                      |                                                                                                                                                                                                                                                                                                                                                                                       |                                                                                                                                                                                                                                                                                                                                                                                                                              | scaffold_9_mRNA_2977.1           | -                           | -                               |
| GF0033376 | 1                             | 0                        | 0                            | 0 Hypothetical protein (1)                                      | nucleic acid binding [GO:0003676 molecular_function] (1)                                                                                                                                                                                                                                                                                                                              | Ribonuclease H-like domain [IPR012337] (1)                                                                                                                                                                                                                                                                                                                                                                                   | scaffold_9_mRNA_2967.1           | -                           | -                               |
| GF0033375 | 1                             | 0                        | 0                            | 0 Hypothetical protein (1)                                      | protein binding [GO:0005515 molecular_function] (1); ATP binding [GO:0005524 molecular_function] (1); protein phosphorylation [GO:0006468 biological_process] (1); protein kinase activity [GO:0004672 molecular_function] (1)                                                                                                                                                        | Serine/threonine-protein kinase, active site [IPR08271] (1); Protein kinase-ATP binding site [IPR017441] (1); Leucine-rich repeat-containing N-terminal, plant-type [IPR013210] (1); Leucine-rich repeat [IPR001611] (1); Protein kinase domain [IPR000719] (1); Leucine-rich repeat domain, L domain-like [IPR032675] (1); Protein kinase-like domain [IPR011009] (1); Leucine-rich repeat, typical subtype [IPR003591] (1) | scaffold_9_mRNA_2961.1           | -                           | -                               |
| GF0033374 | 1                             | 0                        | 0                            | 0 Hypothetical protein (1)                                      | protein kinase activity [GO:0004672 molecular_function] (1); protein phosphorylation [GO:0006468 biological_process] (1); ATP binding [GO:0005524 molecular_function] (1)                                                                                                                                                                                                             | Serine/threonine-protein kinase, active site [IPR08271] (1); Protein kinase-like domain [IPR011009] (1); Protein kinase domain [IPR000719] (1)                                                                                                                                                                                                                                                                               | scaffold_9_mRNA_2960.1           | -                           | -                               |
| GF0033373 | 1                             | 0                        | 0                            | 0 Hypothetical protein (1)                                      |                                                                                                                                                                                                                                                                                                                                                                                       |                                                                                                                                                                                                                                                                                                                                                                                                                              | scaffold_9_mRNA_2958.1           | -                           | -                               |
| GF0033372 | 1                             | 0                        | 0                            | 0 Hypothetical protein (1)                                      |                                                                                                                                                                                                                                                                                                                                                                                       |                                                                                                                                                                                                                                                                                                                                                                                                                              | scaffold_9_mRNA_2957.1           | -                           | -                               |
| GF0033371 | 1                             | 0                        | 0                            | 0 Hypothetical protein (1)                                      | RNA-DNA hybrid ribonuclease activity [GO:0004523 molecular_function] (1); nucleic acid binding [GO:0003676 molecular_function] (1)                                                                                                                                                                                                                                                    | Aspartic peptidase domain [IPR021109] (1); Ribonuclease H-like domain [IPR012337] (1); Ribonuclease H domain [IPR02156] (1)                                                                                                                                                                                                                                                                                                  | scaffold_9_mRNA_2955.1           | -                           | -                               |
| GF0033370 | 1                             | 0                        | 0                            | 0 Hypothetical protein (1)                                      |                                                                                                                                                                                                                                                                                                                                                                                       |                                                                                                                                                                                                                                                                                                                                                                                                                              | scaffold_9_mRNA_2954.1           | -                           | -                               |
| GF0033369 | 1                             | 0                        | 0                            | 0 Hypothetical protein (1)                                      |                                                                                                                                                                                                                                                                                                                                                                                       |                                                                                                                                                                                                                                                                                                                                                                                                                              | scaffold_9_mRNA_2946.1           | -                           | -                               |
| GF0033368 | 1                             | 0                        | 0                            | 0 Hypothetical protein (1)                                      |                                                                                                                                                                                                                                                                                                                                                                                       |                                                                                                                                                                                                                                                                                                                                                                                                                              | scaffold_9_mRNA_2943.1           | -                           | -                               |
| GF0033367 | 1                             | 0                        | 0                            | 0 Putative disease resistance RGA1 (1)                          |                                                                                                                                                                                                                                                                                                                                                                                       | Leucine-rich repeat domain, L domain-like [IPR032675] (1)                                                                                                                                                                                                                                                                                                                                                                    | scaffold_9_mRNA_2942.1           | -                           | -                               |
| GF0033366 | 1                             | 0                        | 0                            | 0 NB-ARC domain disease resistance protein (1)                  | ADP binding [GO:0043531 molecular_function] (1)                                                                                                                                                                                                                                                                                                                                       | NB-ARC [IPR002182] (1); P-loop containing nucleoside triphosphate hydrolase [IPR027417] (1); Winged helix-turn-helix DNA-binding domain [IPR011991] (1)                                                                                                                                                                                                                                                                      | scaffold_9_mRNA_2940.1           | -                           | -                               |
| GF0033365 | 1                             | 0                        | 0                            | 0 Hypothetical protein (1)                                      |                                                                                                                                                                                                                                                                                                                                                                                       |                                                                                                                                                                                                                                                                                                                                                                                                                              | scaffold_9_mRNA_2937.1           | -                           | -                               |
| GF0033364 | 1                             | 0                        | 0                            | 0 Hypothetical protein (1)                                      |                                                                                                                                                                                                                                                                                                                                                                                       |                                                                                                                                                                                                                                                                                                                                                                                                                              | scaffold_9_mRNA_2936.1           | -                           | -                               |
| GF0033363 | 1                             | 0                        | 0                            | 0 Hypothetical protein (1)                                      |                                                                                                                                                                                                                                                                                                                                                                                       |                                                                                                                                                                                                                                                                                                                                                                                                                              | scaffold_9_mRNA_2933.1           | -                           | -                               |
| GF0033362 | 1                             | 0                        | 0                            | 0 Hypothetical protein (1)                                      |                                                                                                                                                                                                                                                                                                                                                                                       | Retrotransposon gag domain [IPR005162] (1); Aspartic peptidase domain [IPR021109] (1)                                                                                                                                                                                                                                                                                                                                        | scaffold_9_mRNA_2928.1           | -                           | -                               |
| GF0033361 | 1                             | 0                        | 0                            | 0 Hypothetical protein (1)                                      |                                                                                                                                                                                                                                                                                                                                                                                       |                                                                                                                                                                                                                                                                                                                                                                                                                              | scaffold_9_mRNA_2927.1           | -                           | -                               |
| GF0033360 | 1                             | 0                        | 0                            | 0 Hypothetical protein (1)                                      |                                                                                                                                                                                                                                                                                                                                                                                       |                                                                                                                                                                                                                                                                                                                                                                                                                              | scaffold_9_mRNA_2926.1           | -                           | -                               |
| GF0033359 | 1                             | 0                        | 0                            | 0 Hypothetical protein (1)                                      |                                                                                                                                                                                                                                                                                                                                                                                       |                                                                                                                                                                                                                                                                                                                                                                                                                              | scaffold_9_mRNA_2920.1           | -                           | -                               |
| GF0033358 | 1                             | 0                        | 0                            | 0 Hypothetical protein (1)                                      | DNA binding [GO:0003677 molecular_function] (1); regulation of transcription, DNA-templated [GO:0006355 biological_process] (1); transcription factor activity, sequence-specific DNA binding [GO:0003700 molecular_function] (1)                                                                                                                                                     | DNA-binding domain [IPR016177] (1); AP2/ERF domain [IPR001471] (1)                                                                                                                                                                                                                                                                                                                                                           | scaffold_9_mRNA_2917.1           | -                           | -                               |
| GF0033357 | 1                             | 0                        | 0                            | 0 Hypothetical protein (1)                                      |                                                                                                                                                                                                                                                                                                                                                                                       |                                                                                                                                                                                                                                                                                                                                                                                                                              | scaffold_9_mRNA_2915.1           | -                           | -                               |
| GF0033356 | 1                             | 0                        | 0                            | 0 Hypothetical protein (1)                                      |                                                                                                                                                                                                                                                                                                                                                                                       |                                                                                                                                                                                                                                                                                                                                                                                                                              | scaffold_9_mRNA_2913.1           | -                           | -                               |
| GF0033355 | 1                             | 0                        | 0                            | 0 Hypothetical protein (1)                                      | nucleic acid binding [GO:0003676 molecular_function] (1); DNA integration [GO:0015074 biological_process] (1)                                                                                                                                                                                                                                                                         | Integrase, catalytic core [IPR001584] (1); Ribonuclease H-like domain [IPR012337] (1)                                                                                                                                                                                                                                                                                                                                        | scaffold_9_mRNA_2909.1           | -                           | -                               |
| GF0033354 | 1                             | 0                        | 0                            | 0 Hypothetical protein (1)                                      |                                                                                                                                                                                                                                                                                                                                                                                       |                                                                                                                                                                                                                                                                                                                                                                                                                              | scaffold_9_mRNA_2907.1           | -                           | -                               |
| GF0033353 | 1                             | 0                        | 0                            | 0 Hypothetical protein (1)                                      |                                                                                                                                                                                                                                                                                                                                                                                       |                                                                                                                                                                                                                                                                                                                                                                                                                              | scaffold_9_mRNA_2901.1           | -                           | -                               |
| GF0033352 | 1                             | 0                        | 0                            | 0 Hypothetical protein (1)                                      |                                                                                                                                                                                                                                                                                                                                                                                       |                                                                                                                                                                                                                                                                                                                                                                                                                              | scaffold_9_mRNA_2900.1           | -                           | -                               |
| GF0033351 | 1                             | 0                        | 0                            | 0 Hypothetical protein (1)                                      |                                                                                                                                                                                                                                                                                                                                                                                       |                                                                                                                                                                                                                                                                                                                                                                                                                              | scaffold_9_mRNA_2896.1           | -                           | -                               |
| GF0033350 | 1                             | 0                        | 0                            | 0 Hypothetical protein (1)                                      | zinc ion binding [GO:0008270 molecular_function] (1); regulation of transcription, DNA-templated [GO:0006355 biological_process] (1)                                                                                                                                                                                                                                                  | FHY3/FAR1 family [IPR031052] (1); FAR1 DNA binding domain [IPR004330] (1); Zinc finger, SWIM-type [IPR007527] (1); MULE retrotransposase domain [IPR018289] (1)                                                                                                                                                                                                                                                              | scaffold_9_mRNA_2895.1           | -                           | -                               |
| GF0033349 | 1                             | 0                        | 0                            | 0 Hypothetical protein (1)                                      |                                                                                                                                                                                                                                                                                                                                                                                       |                                                                                                                                                                                                                                                                                                                                                                                                                              | scaffold_9_mRNA_2894.1           | -                           | -                               |
| GF0033348 | 1                             | 0                        | 0                            | 0 Fragile histidine triad isoform 1 (1)                         | catalytic activity [GO:0003824 molecular_function] (1)                                                                                                                                                                                                                                                                                                                                | Histidine triad (HTT) protein [IPR013110] (1); HIT-like domain [IPR011146] (1); Histidine triad, conserved site [IPR019808] (1)                                                                                                                                                                                                                                                                                              | scaffold_9_mRNA_2890.1           | -                           | -                               |
| GF0033347 | 1                             | 0                        | 0                            | 0 Hypothetical protein (1)                                      |                                                                                                                                                                                                                                                                                                                                                                                       |                                                                                                                                                                                                                                                                                                                                                                                                                              | scaffold_9_mRNA_2887.1           | -                           | -                               |
| GF0033346 | 1                             | 0                        | 0                            | 0 Hypothetical protein (1)                                      | protein dimerization activity [GO:0046983 molecular_function] (1); nucleic acid binding [GO:0003676 molecular_function] (1)                                                                                                                                                                                                                                                           | Ribonuclease H-like domain [IPR012337] (1); HAT, C-terminal dimerization domain [IPR008906] (1)                                                                                                                                                                                                                                                                                                                              | scaffold_9_mRNA_2883.1           | -                           | -                               |
| GF0033345 | 1                             | 0                        | 0                            | 0 Hypothetical protein (1)                                      | DNA binding [GO:0003677 molecular_function] (1); protein dimerization activity [GO:0046983 molecular_function] (1)                                                                                                                                                                                                                                                                    | Transcription factor, MADS-box [IPR002100] (1)                                                                                                                                                                                                                                                                                                                                                                               | scaffold_9_mRNA_2877.1           | -                           | -                               |
| GF0033344 | 1                             | 0                        | 0                            | 0 Hypothetical protein (1)                                      |                                                                                                                                                                                                                                                                                                                                                                                       |                                                                                                                                                                                                                                                                                                                                                                                                                              | scaffold_9_mRNA_2875.1           | -                           | -                               |
| GF0033343 | 1                             | 0                        | 0                            | 0 Hypothetical protein (1)                                      |                                                                                                                                                                                                                                                                                                                                                                                       |                                                                                                                                                                                                                                                                                                                                                                                                                              | scaffold_9_mRNA_2871.1           | -                           | -                               |
| GF0033342 | 1                             | 0                        | 0                            | 0 Hypothetical protein (1)                                      |                                                                                                                                                                                                                                                                                                                                                                                       |                                                                                                                                                                                                                                                                                                                                                                                                                              | scaffold_9_mRNA_2870.1           | -                           | -                               |
| GF0033341 | 1                             | 0                        | 0                            | 0 Hypothetical protein (1)                                      |                                                                                                                                                                                                                                                                                                                                                                                       |                                                                                                                                                                                                                                                                                                                                                                                                                              | scaffold_9_mRNA_2869.1           | -                           | -                               |
| GF0033340 | 1                             | 0                        | 0                            | 0 Hypothetical protein (1)                                      |                                                                                                                                                                                                                                                                                                                                                                                       |                                                                                                                                                                                                                                                                                                                                                                                                                              | scaffold_9_mRNA_2862.1           | -                           | -                               |
| GF0033339 | 1                             | 0                        | 0                            | 0 Hypothetical protein (1)                                      |                                                                                                                                                                                                                                                                                                                                                                                       |                                                                                                                                                                                                                                                                                                                                                                                                                              | scaffold_9_mRNA_2861.1           | -                           | -                               |
| GF0033338 | 1                             | 0                        | 0                            | 0 Polygalacturonase (1)                                         | carbohydrate metabolic process [GO:000975 biological_process] (1); polygalacturonase activity [GO:0004650 molecular_function] (1)                                                                                                                                                                                                                                                     | Pectin lyase fold/virulence factor [IPR011050] (1); Pectin lyase fold [IPR012334] (1); Parallel beta-helix repeat [IPR00626] (1); Glycoside hydrolase, family 28 [IPR00743] (1)                                                                                                                                                                                                                                              | scaffold_9_mRNA_2856.1           | -                           | -                               |
| GF0033337 | 1                             | 0                        | 0                            | 0 Hypothetical protein (1)                                      |                                                                                                                                                                                                                                                                                                                                                                                       |                                                                                                                                                                                                                                                                                                                                                                                                                              | scaffold_9_mRNA_2855.1           | -                           | -                               |
| GF0033336 | 1                             | 0                        | 0                            | 0 MADS-box transcription factor family protein (1)              | DNA binding [GO:0003677 molecular_function] (1); protein dimerization activity [GO:0046983 molecular_function] (1)                                                                                                                                                                                                                                                                    | Transcription factor, MADS-box [IPR002100] (1)                                                                                                                                                                                                                                                                                                                                                                               | scaffold_9_mRNA_2852.1           | -                           | -                               |
| GF0033335 | 1                             | 0                        | 0                            | 0 Hypothetical protein (1)                                      |                                                                                                                                                                                                                                                                                                                                                                                       |                                                                                                                                                                                                                                                                                                                                                                                                                              | scaffold_9_mRNA_2850.1           | -                           | -                               |
| GF0033334 | 1                             | 0                        | 0                            | 0 Hypothetical protein (1)                                      |                                                                                                                                                                                                                                                                                                                                                                                       |                                                                                                                                                                                                                                                                                                                                                                                                                              | scaffold_9_mRNA_2849.1           | -                           | -                               |
| GF0033333 | 1                             | 0                        | 0                            | 0 MADS-box transcription factor family protein (1)              | RNA polymerase II regulatory region sequence-specific DNA binding [GO:0000977 molecular_function] (1); DNA binding [GO:0003677 molecular_function] (1); protein dimerization activity [GO:0046983 molecular_function] (1); MAPK cascade [GO:0000165 biological_process] (1); positive regulation of transcription from RNA polymerase II promoter [GO:0045944 biological_process] (1) | MADS ME2-like [IPR033896] (1); Transcription factor, MADS-box [IPR002100] (1)                                                                                                                                                                                                                                                                                                                                                | scaffold_9_mRNA_2847.1           | -                           | -                               |
| GF0033332 | 1                             | 0                        | 0                            | 0 Hypothetical protein (1)                                      |                                                                                                                                                                                                                                                                                                                                                                                       |                                                                                                                                                                                                                                                                                                                                                                                                                              | scaffold_9_mRNA_2846.1           | -                           | -                               |
| GF0033331 | 1                             | 0                        | 0                            | 0 Hypothetical protein (1)                                      |                                                                                                                                                                                                                                                                                                                                                                                       |                                                                                                                                                                                                                                                                                                                                                                                                                              | scaffold_9_mRNA_2845.1           | -                           | -                               |
| GF0033330 | 1                             | 0                        | 0                            | 0 Hypothetical protein (1)                                      |                                                                                                                                                                                                                                                                                                                                                                                       |                                                                                                                                                                                                                                                                                                                                                                                                                              | scaffold_9_mRNA_2842.1           | -                           | -                               |
| GF0033329 | 1                             | 0                        | 0                            | 0 Hypothetical protein (1)                                      |                                                                                                                                                                                                                                                                                                                                                                                       | Domain of unknown function DUF4218 [IPR025452] (1)                                                                                                                                                                                                                                                                                                                                                                           | scaffold_9_mRNA_2838.1           | -                           | -                               |
| GF0033328 | 1                             | 0                        | 0                            | 0 Hypothetical protein (1)                                      |                                                                                                                                                                                                                                                                                                                                                                                       | Retrotransposon gag domain [IPR005162] (1)                                                                                                                                                                                                                                                                                                                                                                                   | scaffold_9_mRNA_2837.1           | -                           | -                               |
| GF0033327 | 1                             | 0                        | 0                            | 0 MADS-box transcription factor family protein (1)              | DNA binding [GO:0003677 molecular_function] (1); protein dimerization activity [GO:0046983 molecular_function] (1)                                                                                                                                                                                                                                                                    | Transcription factor, MADS-box [IPR002100] (1)                                                                                                                                                                                                                                                                                                                                                                               | scaffold_9_mRNA_2834.1           | -                           | -                               |
| GF0033326 | 1                             | 0                        | 0                            | 0 Polypeptide with reverse transcriptase and RNaseH domains (1) |                                                                                                                                                                                                                                                                                                                                                                                       | Reverse transcriptase, RNA-dependent DNA polymerase [IPR013103] (1)                                                                                                                                                                                                                                                                                                                                                          | scaffold_9_mRNA_2833.1           | -                           | -                               |
| GF0033325 | 1                             | 0                        | 0                            | 0 Hypothetical protein (1)                                      |                                                                                                                                                                                                                                                                                                                                                                                       |                                                                                                                                                                                                                                                                                                                                                                                                                              | scaffold_9_mRNA_2832.1           | -                           | -                               |
| GF0033324 | 1                             | 0                        | 0                            | 0 Hypothetical protein (1)                                      |                                                                                                                                                                                                                                                                                                                                                                                       |                                                                                                                                                                                                                                                                                                                                                                                                                              | scaffold_9_mRNA_2830.1           | -                           | -                               |
| GF0033323 | 1                             | 0                        | 0                            | 0 Hypothetical protein (1)                                      | nucleic acid binding [GO:0003676 molecular_function] (1); zinc ion binding [GO:0008270 molecular_function] (1)                                                                                                                                                                                                                                                                        | Zinc finger, CCHC-type [IPR001878] (1)                                                                                                                                                                                                                                                                                                                                                                                       | scaffold_9_mRNA_2829.1           | -                           | -                               |
| GF0033322 | 1                             | 0                        | 0                            | 0 Putative wall-associated receptor kinase like 16 (1)          | protein phosphorylation [GO:0006468 biological_process] (1); protein kinase activity [GO:0004672 molecular_function] (1); ATP binding [GO:0005524 molecular_function] (1)                                                                                                                                                                                                             | Protein kinase domain [IPR000719] (1); Protein kinase-like domain [IPR011009] (1)                                                                                                                                                                                                                                                                                                                                            | scaffold_9_mRNA_2822.1           | -                           | -                               |
| GF0033321 | 1                             | 0                        | 0                            | 0 Hypothetical protein (1)                                      |                                                                                                                                                                                                                                                                                                                                                                                       |                                                                                                                                                                                                                                                                                                                                                                                                                              | scaffold_9_mRNA_2821.1           | -                           | -                               |

| ID        | Num. in <i>C. clementiae</i> | Num. in <i>C. uchiha</i> | Num. in <i>P. trifoliata</i> | Note                                                           | GO                                                                                                                                                                                                                               | InterPro                                                                                                                                                                                                               | Members in <i>C. clementiae</i> | Members in <i>C. uchiha</i> | Members in <i>P. trifoliata</i> |
|-----------|------------------------------|--------------------------|------------------------------|----------------------------------------------------------------|----------------------------------------------------------------------------------------------------------------------------------------------------------------------------------------------------------------------------------|------------------------------------------------------------------------------------------------------------------------------------------------------------------------------------------------------------------------|---------------------------------|-----------------------------|---------------------------------|
| GF0033320 | 1                            | 0                        | 0                            | MADS-box transcription factor family protein (1)               | DNA binding [GO:0003677 molecular_function] (1); protein dimerization activity [GO:0046983 molecular_function] (1)                                                                                                               | Transcription factor, MADS-box [IPR002100] (1)                                                                                                                                                                         | scaffold_9_mRNA_2818.1          | -                           | -                               |
| GF0033319 | 1                            | 0                        | 0                            | Copia-like retrotransposon Hopscoch polyprotein (1)            | nucleic acid binding [GO:0003676 molecular_function] (1); DNA integration [GO:0015074 biological_process] (1)                                                                                                                    | GAG-pre-integrase domain [IPR025724] (1); Integrase, catalytic core [IPR001584] (1); Reverse transcriptase, RNA-dependent DNA polymerase [IPR013103] (1); Ribonuclease H-like domain [IPR012337] (1)                   | scaffold_9_mRNA_2816.1          | -                           | -                               |
| GF0033318 | 1                            | 0                        | 0                            | Cytokinin riboside 5'-monophosphate phosphoribohydrolase (1)   |                                                                                                                                                                                                                                  | LOG family [IPR031100] (1)                                                                                                                                                                                             | scaffold_9_mRNA_2815.1          | -                           | -                               |
| GF0033317 | 1                            | 0                        | 0                            | Hypothetical protein (1)                                       |                                                                                                                                                                                                                                  |                                                                                                                                                                                                                        | scaffold_9_mRNA_2814.1          | -                           | -                               |
| GF0033316 | 1                            | 0                        | 0                            | Hypothetical protein (1)                                       | DNA binding [GO:0003677 molecular_function] (1); protein dimerization activity [GO:0046983 molecular_function] (1)                                                                                                               | Transcription factor, MADS-box [IPR002100] (1)                                                                                                                                                                         | scaffold_9_mRNA_2808.1          | -                           | -                               |
| GF0033315 | 1                            | 0                        | 0                            | Hypothetical protein (1)                                       | nucleic acid binding [GO:0003676 molecular_function] (1)                                                                                                                                                                         | Ribonuclease H-like domain [IPR012337] (1)                                                                                                                                                                             | scaffold_9_mRNA_2807.1          | -                           | -                               |
| GF0033314 | 1                            | 0                        | 0                            | Hypothetical protein (1)                                       |                                                                                                                                                                                                                                  |                                                                                                                                                                                                                        | scaffold_9_mRNA_2803.1          | -                           | -                               |
| GF0033313 | 1                            | 0                        | 0                            | F-box protein interaction domain protein (1)                   | protein binding [GO:0005515 molecular_function] (1)                                                                                                                                                                              | Kelch-type beta propeller [IPR015915] (1); F-box associated interaction domain [IPR017451] (1); Galactose oxidase/kelch_beta-propeller [IPR011043] (1)                                                                 | scaffold_9_mRNA_2801.1          | -                           | -                               |
| GF0033312 | 1                            | 0                        | 0                            | Hypothetical protein (1)                                       |                                                                                                                                                                                                                                  |                                                                                                                                                                                                                        | scaffold_9_mRNA_2792.1          | -                           | -                               |
| GF0033311 | 1                            | 0                        | 0                            | Hypothetical protein (1)                                       |                                                                                                                                                                                                                                  |                                                                                                                                                                                                                        | scaffold_9_mRNA_2787.1          | -                           | -                               |
| GF0033310 | 1                            | 0                        | 0                            | Hypothetical protein (1)                                       | nucleic acid binding [GO:0003676 molecular_function] (1); regulation of transcription, DNA-templated [GO:0006355 biological_process] (1)                                                                                         | Carlavirus nucleic acid-binding protein [IPR025688] (1)                                                                                                                                                                | scaffold_9_mRNA_2786.1          | -                           | -                               |
| GF0033309 | 1                            | 0                        | 0                            | Hypothetical protein (1)                                       | DNA binding [GO:0003677 molecular_function] (1); nucleic acid binding [GO:0003676 molecular_function] (1)                                                                                                                        | Zinc finger, BED-type [IPR003656] (1); Zinc finger C2H2-type [IPR013087] (1)                                                                                                                                           | scaffold_9_mRNA_2779.1          | -                           | -                               |
| GF0033308 | 1                            | 0                        | 0                            | MuDR family transposase isoform 1 (1)                          | DNA binding [GO:0003677 molecular_function] (1); transposition, DNA-mediated [GO:0006313 biological_process] (1); zinc ion binding [GO:0008270 molecular_function] (1); transposase activity [GO:0004803 molecular_function] (1) | Zinc finger, SWIM-type [IPR007527] (1); Transposase, mutator type [IPR001207] (1); Transposase, MuDR, plant [IPR004332] (1); Zinc finger, PMZ-type [IPR006564] (1); MULE transposase domain [IPR018289] (1)            | scaffold_9_mRNA_2777.1          | -                           | -                               |
| GF0033307 | 1                            | 0                        | 0                            | Hypothetical protein (1)                                       | calmodulin binding [GO:0005516 molecular_function] (1)                                                                                                                                                                           | Probable transposase, Pta/EnSpm, plant [IPR004252] (1); Calcium-transporting P-type ATPase, N-terminal autoinhibitory domain [IPR024750] (1); Transposase, Tnp1/EnSpm-like [IPR004264] (1)                             | scaffold_9_mRNA_2770.1          | -                           | -                               |
| GF0033306 | 1                            | 0                        | 0                            | Hypothetical protein (1)                                       |                                                                                                                                                                                                                                  |                                                                                                                                                                                                                        | scaffold_9_mRNA_2769.1          | -                           | -                               |
| GF0033305 | 1                            | 0                        | 0                            | Hypothetical protein (1)                                       |                                                                                                                                                                                                                                  |                                                                                                                                                                                                                        | scaffold_9_mRNA_2763.1          | -                           | -                               |
| GF0033304 | 1                            | 0                        | 0                            | Hypothetical protein (1)                                       | metabolic process [GO:0008152 biological_process] (1); methyltransferase activity [GO:0008168 molecular_function] (1)                                                                                                            | Methyltransferase type 11 [IPR013216] (1); S-adenosyl-L-methionine-dependent methyltransferase [IPR029631] (1); Viral movement protein [IPR028919] (1)                                                                 | scaffold_9_mRNA_2761.1          | -                           | -                               |
| GF0033303 | 1                            | 0                        | 0                            | Hypothetical protein (1)                                       |                                                                                                                                                                                                                                  |                                                                                                                                                                                                                        | scaffold_9_mRNA_2759.1          | -                           | -                               |
| GF0033302 | 1                            | 0                        | 0                            | Hypothetical protein (1)                                       | nucleic acid binding [GO:0003676 molecular_function] (1); zinc ion binding [GO:0008270 molecular_function] (1)                                                                                                                   | Zinc finger, CCHC-type [IPR001878] (1)                                                                                                                                                                                 | scaffold_9_mRNA_2756.1          | -                           | -                               |
| GF0033301 | 1                            | 0                        | 0                            | Hypothetical protein (1)                                       |                                                                                                                                                                                                                                  | Retrotransposon gag domain [IPR005162] (1)                                                                                                                                                                             | scaffold_9_mRNA_2751.1          | -                           | -                               |
| GF0033300 | 1                            | 0                        | 0                            | Embryonic abundant protein-like (1)                            | protein dimerization activity [GO:0046983 molecular_function] (1)                                                                                                                                                                | HAT, C-terminal dimerization domain [IPR008991] (1); S-adenosyl-L-methionine-dependent methyltransferase [IPR029631] (1)                                                                                               | scaffold_9_mRNA_2750.1          | -                           | -                               |
| GF0033299 | 1                            | 0                        | 0                            | Hypothetical protein (1)                                       |                                                                                                                                                                                                                                  |                                                                                                                                                                                                                        | scaffold_9_mRNA_2748.1          | -                           | -                               |
| GF0033298 | 1                            | 0                        | 0                            | Hypothetical protein (1)                                       |                                                                                                                                                                                                                                  |                                                                                                                                                                                                                        | scaffold_9_mRNA_2747.1          | -                           | -                               |
| GF0033297 | 1                            | 0                        | 0                            | Hypothetical protein (1)                                       |                                                                                                                                                                                                                                  |                                                                                                                                                                                                                        | scaffold_9_mRNA_2745.1          | -                           | -                               |
| GF0033296 | 1                            | 0                        | 0                            | Hypothetical protein (1)                                       |                                                                                                                                                                                                                                  |                                                                                                                                                                                                                        | scaffold_9_mRNA_2744.1          | -                           | -                               |
| GF0033295 | 1                            | 0                        | 0                            | Hypothetical protein (1)                                       | regulation of transcription, DNA-templated [GO:0006355 biological_process] (1); nucleic acid binding [GO:0003676 molecular_function] (1)                                                                                         | Carlavirus nucleic acid-binding protein [IPR025688] (1)                                                                                                                                                                | scaffold_9_mRNA_2718.1          | -                           | -                               |
| GF0033294 | 1                            | 0                        | 0                            | Hypothetical protein (1)                                       |                                                                                                                                                                                                                                  |                                                                                                                                                                                                                        | scaffold_9_mRNA_2712.1          | -                           | -                               |
| GF0033293 | 1                            | 0                        | 0                            | Hypothetical protein (1)                                       | proteolysis [GO:0006508 biological_process] (1); cysteine-type peptidase activity [GO:0008234 molecular_function] (1)                                                                                                            | Upl1 protease family, C-terminal catalytic domain [IPR003653] (1); Peptidase C57, Vaccinia virus protein 17 [IPR004970] (1); Transposase-associated domain [IPR029480] (1)                                             | scaffold_9_mRNA_2709.1          | -                           | -                               |
| GF0033292 | 1                            | 0                        | 0                            | Hypothetical protein (1)                                       |                                                                                                                                                                                                                                  |                                                                                                                                                                                                                        | scaffold_9_mRNA_2708.1          | -                           | -                               |
| GF0033291 | 1                            | 0                        | 0                            | Hypothetical protein (1)                                       |                                                                                                                                                                                                                                  |                                                                                                                                                                                                                        | scaffold_9_mRNA_2707.1          | -                           | -                               |
| GF0033290 | 1                            | 0                        | 0                            | Hypothetical protein (1)                                       |                                                                                                                                                                                                                                  | Aspartic peptidase domain [IPR021109] (1)                                                                                                                                                                              | scaffold_9_mRNA_2706.1          | -                           | -                               |
| GF0033289 | 1                            | 0                        | 0                            | Hypothetical protein (1)                                       |                                                                                                                                                                                                                                  |                                                                                                                                                                                                                        | scaffold_9_mRNA_2696.1          | -                           | -                               |
| GF0033288 | 1                            | 0                        | 0                            | Hypothetical protein (1)                                       |                                                                                                                                                                                                                                  |                                                                                                                                                                                                                        | scaffold_9_mRNA_2694.1          | -                           | -                               |
| GF0033287 | 1                            | 0                        | 0                            | Hypothetical protein (1)                                       |                                                                                                                                                                                                                                  |                                                                                                                                                                                                                        | scaffold_9_mRNA_2693.1          | -                           | -                               |
| GF0033286 | 1                            | 0                        | 0                            | Hypothetical protein (1)                                       |                                                                                                                                                                                                                                  |                                                                                                                                                                                                                        | scaffold_9_mRNA_2681.1          | -                           | -                               |
| GF0033285 | 1                            | 0                        | 0                            | Hypothetical protein (1)                                       |                                                                                                                                                                                                                                  |                                                                                                                                                                                                                        | scaffold_9_mRNA_2679.1          | -                           | -                               |
| GF0033284 | 1                            | 0                        | 0                            | Hypothetical protein (1)                                       |                                                                                                                                                                                                                                  | Transposon, En/Spm-like [IPR004242] (1); Probable transposase, Pta/EnSpm, plant [IPR004252] (1); Transposase-associated domain [IPR029480] (1)                                                                         | scaffold_9_mRNA_2678.1          | -                           | -                               |
| GF0033283 | 1                            | 0                        | 0                            | Hypothetical protein (1)                                       |                                                                                                                                                                                                                                  |                                                                                                                                                                                                                        | scaffold_9_mRNA_2677.1          | -                           | -                               |
| GF0033282 | 1                            | 0                        | 0                            | Hypothetical protein (1)                                       |                                                                                                                                                                                                                                  |                                                                                                                                                                                                                        | scaffold_9_mRNA_2670.1          | -                           | -                               |
| GF0033281 | 1                            | 0                        | 0                            | Putative muDR family transposase-like (1)                      |                                                                                                                                                                                                                                  | MULE transposase domain [IPR018289] (1)                                                                                                                                                                                | scaffold_9_mRNA_2666.1          | -                           | -                               |
| GF0033280 | 1                            | 0                        | 0                            | Hypothetical protein (1)                                       |                                                                                                                                                                                                                                  |                                                                                                                                                                                                                        | scaffold_9_mRNA_2663.1          | -                           | -                               |
| GF0033279 | 1                            | 0                        | 0                            | Hypothetical protein (1)                                       | nucleic acid binding [GO:0003676 molecular_function] (1)                                                                                                                                                                         | RNA recognition motif domain [IPR000504] (1)                                                                                                                                                                           | scaffold_9_mRNA_2660.1          | -                           | -                               |
| GF0033278 | 1                            | 0                        | 0                            | U3 small nuclear rna-associated protein 18 (1)                 | protein binding [GO:0005515 molecular_function] (1)                                                                                                                                                                              | WD40/YVTN repeat-like-containing domain [IPR015943] (1); WD40 repeat [IPR016001] (1); WD40-repeat-containing domain [IPR017986] (1)                                                                                    | scaffold_9_mRNA_2657.1          | -                           | -                               |
| GF0033277 | 1                            | 0                        | 0                            | Hypothetical protein (1)                                       | zinc ion binding [GO:0008270 molecular_function] (1); nucleic acid binding [GO:0003676 molecular_function] (1)                                                                                                                   | Zinc finger, CCHC-type [IPR001878] (1); Zinc finger, PMZ-type [IPR006564] (1); Zinc finger, SWIM-type [IPR007527] (1)                                                                                                  | scaffold_9_mRNA_2655.1          | -                           | -                               |
| GF0033276 | 1                            | 0                        | 0                            | Hypothetical protein (1)                                       |                                                                                                                                                                                                                                  |                                                                                                                                                                                                                        | scaffold_9_mRNA_2649.1          | -                           | -                               |
| GF0033275 | 1                            | 0                        | 0                            | Hypothetical protein (1)                                       |                                                                                                                                                                                                                                  |                                                                                                                                                                                                                        | scaffold_9_mRNA_2645.1          | -                           | -                               |
| GF0033274 | 1                            | 0                        | 0                            | Hypothetical protein (1)                                       |                                                                                                                                                                                                                                  |                                                                                                                                                                                                                        | scaffold_9_mRNA_2641.1          | -                           | -                               |
| GF0033273 | 1                            | 0                        | 0                            | Hypothetical protein (1)                                       |                                                                                                                                                                                                                                  |                                                                                                                                                                                                                        | scaffold_9_mRNA_2635.1          | -                           | -                               |
| GF0033272 | 1                            | 0                        | 0                            | Auxin-induced in root cultures protein 12 (1)                  |                                                                                                                                                                                                                                  | DOMON domain [IPR005018] (1); Cytochrome b561/ferriic reductase transmembrane [IPR006593] (1); Cytochrome b561 and DOMON domain-containing protein [IPR017214] (1)                                                     | scaffold_9_mRNA_2630.1          | -                           | -                               |
| GF0033271 | 1                            | 0                        | 0                            | Ribonuclease H protein, putative (1)                           |                                                                                                                                                                                                                                  | Reverse transcriptase zinc-binding domain [IPR026960] (1)                                                                                                                                                              | scaffold_9_mRNA_2629.1          | -                           | -                               |
| GF0033270 | 1                            | 0                        | 0                            | Hypothetical protein (1)                                       |                                                                                                                                                                                                                                  | LOG family [IPR031100] (1); Endonuclease/exonuclease/phosphatase [IPR005135] (1); Cytokinin riboside 5'-monophosphate phosphoribohydrolase LOG [IPR005269] (1)                                                         | scaffold_9_mRNA_2627.1          | -                           | -                               |
| GF0033269 | 1                            | 0                        | 0                            | Hypothetical protein (1)                                       |                                                                                                                                                                                                                                  | Domain of unknown function DUF4283 [IPR025588] (1); Cytochrome b561 and DOMON domain-containing protein [IPR017214] (1); Cytochrome b561/ferriic reductase transmembrane [IPR006593] (1); DOMON domain [IPR005018] (1) | scaffold_9_mRNA_2626.1          | -                           | -                               |
| GF0033268 | 1                            | 0                        | 0                            | Auxin-induced in root cultures protein 12 (1)                  |                                                                                                                                                                                                                                  | Cytochrome b561/ferriic reductase transmembrane [IPR006593] (1); DOMON domain [IPR005018] (1)                                                                                                                          | scaffold_9_mRNA_2622.1          | -                           | -                               |
| GF0033267 | 1                            | 0                        | 0                            | SLG-Sc and SLA-Sc genes and Melon retrotransposon sequence (1) | DNA integration [GO:0015074 biological_process] (1); nucleic acid binding [GO:0003676 molecular_function] (1)                                                                                                                    | GAG-pre-integrase domain [IPR025724] (1); Integrase, catalytic core [IPR001584] (1); Ribonuclease H-like domain [IPR012337] (1)                                                                                        | scaffold_9_mRNA_2621.1          | -                           | -                               |
| GF0033266 | 1                            | 0                        | 0                            | Hypothetical protein (1)                                       |                                                                                                                                                                                                                                  |                                                                                                                                                                                                                        | scaffold_9_mRNA_2616.1          | -                           | -                               |
| GF0033265 | 1                            | 0                        | 0                            | Hypothetical protein (1)                                       |                                                                                                                                                                                                                                  | Retrotransposon gag domain [IPR005162] (1)                                                                                                                                                                             | scaffold_9_mRNA_2615.1          | -                           | -                               |
| GF0033264 | 1                            | 0                        | 0                            | Hypothetical protein (1)                                       |                                                                                                                                                                                                                                  |                                                                                                                                                                                                                        | scaffold_9_mRNA_2602.1          | -                           | -                               |
| GF0033263 | 1                            | 0                        | 0                            | Putative retroelement pol polyprotein (1)                      | zinc ion binding [GO:0008270 molecular_function] (1); nucleic acid binding [GO:0003676 molecular_function] (1)                                                                                                                   | Zinc finger, CCHC-type [IPR001878] (1)                                                                                                                                                                                 | scaffold_9_mRNA_2598.1          | -                           | -                               |
| GF0033262 | 1                            | 0                        | 0                            | Hypothetical protein (1)                                       |                                                                                                                                                                                                                                  |                                                                                                                                                                                                                        | scaffold_9_mRNA_2597.1          | -                           | -                               |
| GF0033261 | 1                            | 0                        | 0                            | Hypothetical protein (1)                                       |                                                                                                                                                                                                                                  | Reverse transcriptase zinc-binding domain [IPR026960] (1)                                                                                                                                                              | scaffold_9_mRNA_2596.1          | -                           | -                               |
| GF0033260 | 1                            | 0                        | 0                            | Hypothetical protein (1)                                       |                                                                                                                                                                                                                                  |                                                                                                                                                                                                                        | scaffold_9_mRNA_2592.1          | -                           | -                               |

| ID       | Num. in <i>C. clementiae</i> | Num. in <i>C. uctus</i> | Num. in <i>P. trifoliate</i> | Note                                                           | GO                                                                                                                                                                                                                                                                                                                                              | InterPro                                                                                                                                                                       | Members in <i>C. clementiae</i> | Members in <i>C. uctus</i> | Members in <i>P. trifoliate</i> |
|----------|------------------------------|-------------------------|------------------------------|----------------------------------------------------------------|-------------------------------------------------------------------------------------------------------------------------------------------------------------------------------------------------------------------------------------------------------------------------------------------------------------------------------------------------|--------------------------------------------------------------------------------------------------------------------------------------------------------------------------------|---------------------------------|----------------------------|---------------------------------|
| GF003259 | 1                            | 0                       | 0                            | 0 Hypothetical protein (1)                                     |                                                                                                                                                                                                                                                                                                                                                 |                                                                                                                                                                                | scaffold_9_mRNA_2591.1          | -                          | -                               |
| GF003258 | 1                            | 0                       | 0                            | 0 Hypothetical protein (1)                                     |                                                                                                                                                                                                                                                                                                                                                 | Domain of unknown function DUF4216 [IPR025312] (1); Transposase-associated domain [IPR029480] (1)                                                                              | scaffold_9_mRNA_2589.1          | -                          | -                               |
| GF003257 | 1                            | 0                       | 0                            | 0 Hypothetical protein (1)                                     | single-stranded DNA binding [GO:0003697 molecular_function] (1); DNA metabolic process [GO:0006259 biological_process] (1); DNA-dependent ATPase activity [GO:0008094 molecular_function] (1); DNA repair [GO:0006281 biological_process] (1); DNA binding [GO:0003677 molecular_function] (1); ATP binding [GO:0005524 molecular_function] (1) | DNA recombination and repair protein RecA [IPR013765] (1); DNA recombination and repair protein RecA, monomer-monomer interface [IPR020587] (1)                                | scaffold_9_mRNA_2588.1          | -                          | -                               |
| GF003256 | 1                            | 0                       | 0                            | 0 Hypothetical protein (1)                                     |                                                                                                                                                                                                                                                                                                                                                 |                                                                                                                                                                                | scaffold_9_mRNA_2583.1          | -                          | -                               |
| GF003255 | 1                            | 0                       | 0                            | 0 Hypothetical protein (1)                                     |                                                                                                                                                                                                                                                                                                                                                 | LOG family [IPR031100] (1)                                                                                                                                                     | scaffold_9_mRNA_2579.1          | -                          | -                               |
| GF003254 | 1                            | 0                       | 0                            | 0 Hypothetical protein (1)                                     | calcium ion binding [GO:0005509 molecular_function] (1)                                                                                                                                                                                                                                                                                         | EF-Hand 1, calcium-binding site [IPR018247] (1); EF-hand domain [IPR002048] (1); EF-hand domain pair [IPR011992] (1)                                                           | scaffold_9_mRNA_2562.1          | -                          | -                               |
| GF003253 | 1                            | 0                       | 0                            | 0 Hypothetical protein (1)                                     |                                                                                                                                                                                                                                                                                                                                                 |                                                                                                                                                                                | scaffold_9_mRNA_2555.1          | -                          | -                               |
| GF003252 | 1                            | 0                       | 0                            | 0 Hypothetical protein (1)                                     |                                                                                                                                                                                                                                                                                                                                                 |                                                                                                                                                                                | scaffold_9_mRNA_2553.1          | -                          | -                               |
| GF003251 | 1                            | 0                       | 0                            | 0 Hypothetical protein (1)                                     | proteolysis [GO:0006508 biological_process] (1); cysteine-type peptidase activity [GO:0008234 molecular_function] (1)                                                                                                                                                                                                                           | Ulp1 protease family, C-terminal catalytic domain [IPR003653] (1); Transposon, En/Spm-like [IPR004242] (1)                                                                     | scaffold_9_mRNA_2551.1          | -                          | -                               |
| GF003250 | 1                            | 0                       | 0                            | 0 Hypothetical protein (1)                                     |                                                                                                                                                                                                                                                                                                                                                 |                                                                                                                                                                                | scaffold_9_mRNA_2550.1          | -                          | -                               |
| GF003249 | 1                            | 0                       | 0                            | 0 Hypothetical protein (1)                                     |                                                                                                                                                                                                                                                                                                                                                 |                                                                                                                                                                                | scaffold_9_mRNA_2542.1          | -                          | -                               |
| GF003248 | 1                            | 0                       | 0                            | 0 Hypothetical protein (1)                                     |                                                                                                                                                                                                                                                                                                                                                 |                                                                                                                                                                                | scaffold_9_mRNA_2537.1          | -                          | -                               |
| GF003247 | 1                            | 0                       | 0                            | 0 Hypothetical protein (1)                                     |                                                                                                                                                                                                                                                                                                                                                 | Retrotransposon gag domain [IPR005162] (1)                                                                                                                                     | scaffold_9_mRNA_2536.1          | -                          | -                               |
| GF003246 | 1                            | 0                       | 0                            | 0 LRR receptor-like kinase family protein (1)                  | protein binding [GO:0005515 molecular_function] (1)                                                                                                                                                                                                                                                                                             | Leucine-rich repeat [IPR001611] (1); Leucine-rich repeat, typical subtype [IPR003591] (1); Leucine-rich repeat domain, L domain-like [IPR032675] (1)                           | scaffold_9_mRNA_2535.1          | -                          | -                               |
| GF003245 | 1                            | 0                       | 0                            | 0 Monosaccharide transport protein (1)                         |                                                                                                                                                                                                                                                                                                                                                 |                                                                                                                                                                                | scaffold_9_mRNA_2533.1          | -                          | -                               |
| GF003244 | 1                            | 0                       | 0                            | 0 Hypothetical protein (1)                                     |                                                                                                                                                                                                                                                                                                                                                 |                                                                                                                                                                                | scaffold_9_mRNA_2532.1          | -                          | -                               |
| GF003243 | 1                            | 0                       | 0                            | 0 Hypothetical protein (1)                                     |                                                                                                                                                                                                                                                                                                                                                 |                                                                                                                                                                                | scaffold_9_mRNA_2531.1          | -                          | -                               |
| GF003242 | 1                            | 0                       | 0                            | 0 Hypothetical protein (1)                                     |                                                                                                                                                                                                                                                                                                                                                 |                                                                                                                                                                                | scaffold_9_mRNA_2530.1          | -                          | -                               |
| GF003241 | 1                            | 0                       | 0                            | 0 Leucine-rich repeat receptor protein kinase EXS (1)          |                                                                                                                                                                                                                                                                                                                                                 | Leucine-rich repeat domain, L domain-like [IPR032675] (1)                                                                                                                      | scaffold_9_mRNA_2525.1          | -                          | -                               |
| GF003240 | 1                            | 0                       | 0                            | 0 Hypothetical protein (1)                                     | metabolic process [GO:0008152 biological_process] (1); catalytic activity [GO:0003524 molecular_function] (1)                                                                                                                                                                                                                                   | Famylactacetaesase, C-terminal-related [IPR011234] (1)                                                                                                                         | scaffold_9_mRNA_252.1           | -                          | -                               |
| GF003239 | 1                            | 0                       | 0                            | 0 Hypothetical protein (1)                                     |                                                                                                                                                                                                                                                                                                                                                 |                                                                                                                                                                                | scaffold_9_mRNA_2512.1          | -                          | -                               |
| GF003238 | 1                            | 0                       | 0                            | 0 Hypothetical protein (1)                                     |                                                                                                                                                                                                                                                                                                                                                 |                                                                                                                                                                                | scaffold_9_mRNA_2510.1          | -                          | -                               |
| GF003237 | 1                            | 0                       | 0                            | 0 Hypothetical protein (1)                                     |                                                                                                                                                                                                                                                                                                                                                 |                                                                                                                                                                                | scaffold_9_mRNA_2508.1          | -                          | -                               |
| GF003236 | 1                            | 0                       | 0                            | 0 Hypothetical protein (1)                                     |                                                                                                                                                                                                                                                                                                                                                 |                                                                                                                                                                                | scaffold_9_mRNA_2507.1          | -                          | -                               |
| GF003235 | 1                            | 0                       | 0                            | 0 Cytokinin riboside 5'-monophosphate phosphoribohydrolase (1) |                                                                                                                                                                                                                                                                                                                                                 | LOG family [IPR031100] (1)                                                                                                                                                     | scaffold_9_mRNA_2503.1          | -                          | -                               |
| GF003234 | 1                            | 0                       | 0                            | 0 Putative emDR family transposase-like (1)                    | zinc ion binding [GO:0008270 molecular_function] (1)                                                                                                                                                                                                                                                                                            | Zinc finger, PMZ-type [IPR006564] (1); MULE transposase domain [IPR018289] (1); Zinc finger, SWIM-type [IPR007527] (1)                                                         | scaffold_9_mRNA_2498.1          | -                          | -                               |
| GF003233 | 1                            | 0                       | 0                            | 0 Hypothetical protein (1)                                     |                                                                                                                                                                                                                                                                                                                                                 |                                                                                                                                                                                | scaffold_9_mRNA_2495.1          | -                          | -                               |
| GF003232 | 1                            | 0                       | 0                            | 0 Hypothetical protein (1)                                     |                                                                                                                                                                                                                                                                                                                                                 | HSP20-like chaperone [IPR008978] (1)                                                                                                                                           | scaffold_9_mRNA_2494.1          | -                          | -                               |
| GF003231 | 1                            | 0                       | 0                            | 0 Hypothetical protein (1)                                     |                                                                                                                                                                                                                                                                                                                                                 | HSP20-like chaperone [IPR008978] (1)                                                                                                                                           | scaffold_9_mRNA_2492.1          | -                          | -                               |
| GF003230 | 1                            | 0                       | 0                            | 0 Cytokinin riboside 5'-monophosphate phosphoribohydrolase (1) |                                                                                                                                                                                                                                                                                                                                                 | LOG family [IPR031100] (1)                                                                                                                                                     | scaffold_9_mRNA_2491.1          | -                          | -                               |
| GF003229 | 1                            | 0                       | 0                            | 0 Hypothetical protein (1)                                     |                                                                                                                                                                                                                                                                                                                                                 | Small heat shock protein HSP20 [IPR031107] (1); Alpha crystallin/Hsp20 domain [IPR02068] (1); HSP20-like chaperone [IPR008978] (1)                                             | scaffold_9_mRNA_2489.1          | -                          | -                               |
| GF003228 | 1                            | 0                       | 0                            | 0 Hypothetical protein (1)                                     |                                                                                                                                                                                                                                                                                                                                                 |                                                                                                                                                                                | scaffold_9_mRNA_2487.1          | -                          | -                               |
| GF003227 | 1                            | 0                       | 0                            | 0 Hypothetical protein (1)                                     |                                                                                                                                                                                                                                                                                                                                                 |                                                                                                                                                                                | scaffold_9_mRNA_2484.1          | -                          | -                               |
| GF003226 | 1                            | 0                       | 0                            | 0 Hypothetical protein (1)                                     |                                                                                                                                                                                                                                                                                                                                                 |                                                                                                                                                                                | scaffold_9_mRNA_2483.1          | -                          | -                               |
| GF003225 | 1                            | 0                       | 0                            | 0 Ribonuclease H (1)                                           | nucleic acid binding [GO:0003676 molecular_function] (1)                                                                                                                                                                                                                                                                                        | Ribonuclease H-like domain [IPR012373] (1); Domain of unknown function DUF4283 [IPR025558] (1); Reverse transcriptase zinc-binding domain [IPR026960] (1)                      | scaffold_9_mRNA_2481.1          | -                          | -                               |
| GF003224 | 1                            | 0                       | 0                            | 0 Hypothetical protein (1)                                     |                                                                                                                                                                                                                                                                                                                                                 |                                                                                                                                                                                | scaffold_9_mRNA_2480.1          | -                          | -                               |
| GF003223 | 1                            | 0                       | 0                            | 0 Hypothetical protein (1)                                     |                                                                                                                                                                                                                                                                                                                                                 |                                                                                                                                                                                | scaffold_9_mRNA_2478.1          | -                          | -                               |
| GF003222 | 1                            | 0                       | 0                            | 0 Hypothetical protein (1)                                     |                                                                                                                                                                                                                                                                                                                                                 |                                                                                                                                                                                | scaffold_9_mRNA_2477.1          | -                          | -                               |
| GF003221 | 1                            | 0                       | 0                            | 0 Hypothetical protein (1)                                     |                                                                                                                                                                                                                                                                                                                                                 |                                                                                                                                                                                | scaffold_9_mRNA_2475.1          | -                          | -                               |
| GF003220 | 1                            | 0                       | 0                            | 0 Hypothetical protein (1)                                     |                                                                                                                                                                                                                                                                                                                                                 | HSP20-like chaperone [IPR008978] (1)                                                                                                                                           | scaffold_9_mRNA_2474.1          | -                          | -                               |
| GF003219 | 1                            | 0                       | 0                            | 0 Hypothetical protein (1)                                     |                                                                                                                                                                                                                                                                                                                                                 |                                                                                                                                                                                | scaffold_9_mRNA_247.1           | -                          | -                               |
| GF003218 | 1                            | 0                       | 0                            | 0 Transcription factor ORG2 (1)                                | DNA binding [GO:0003677 molecular_function] (1); protein dimerization activity [GO:0046983 molecular_function] (1)                                                                                                                                                                                                                              | Achaete-scute transcription factor-related [IPR015660] (1); Myc-type, basic helix-loop-helix (bHLH) domain [IPR011598] (1)                                                     | scaffold_9_mRNA_2467.1          | -                          | -                               |
| GF003217 | 1                            | 0                       | 0                            | 0 Hypothetical protein (1)                                     |                                                                                                                                                                                                                                                                                                                                                 |                                                                                                                                                                                | scaffold_9_mRNA_2462.1          | -                          | -                               |
| GF003216 | 1                            | 0                       | 0                            | 0 Hypothetical protein (1)                                     |                                                                                                                                                                                                                                                                                                                                                 | Aspartic peptidase domain [IPR021109] (1)                                                                                                                                      | scaffold_9_mRNA_2453.1          | -                          | -                               |
| GF003215 | 1                            | 0                       | 0                            | 0 Hypothetical protein (1)                                     |                                                                                                                                                                                                                                                                                                                                                 |                                                                                                                                                                                | scaffold_9_mRNA_2452.1          | -                          | -                               |
| GF003214 | 1                            | 0                       | 0                            | 0 Cytokinin riboside 5'-monophosphate phosphoribohydrolase (1) |                                                                                                                                                                                                                                                                                                                                                 | LOG family [IPR031100] (1)                                                                                                                                                     | scaffold_9_mRNA_2450.1          | -                          | -                               |
| GF003213 | 1                            | 0                       | 0                            | 0 Hypothetical protein (1)                                     |                                                                                                                                                                                                                                                                                                                                                 |                                                                                                                                                                                | scaffold_9_mRNA_2449.1          | -                          | -                               |
| GF003212 | 1                            | 0                       | 0                            | 0 Cytokinin riboside 5'-monophosphate phosphoribohydrolase (1) |                                                                                                                                                                                                                                                                                                                                                 | LOG family [IPR031100] (1)                                                                                                                                                     | scaffold_9_mRNA_2433.1          | -                          | -                               |
| GF003211 | 1                            | 0                       | 0                            | 0 Hypothetical protein (1)                                     |                                                                                                                                                                                                                                                                                                                                                 |                                                                                                                                                                                | scaffold_9_mRNA_2431.1          | -                          | -                               |
| GF003210 | 1                            | 0                       | 0                            | 0 Hypothetical protein (1)                                     |                                                                                                                                                                                                                                                                                                                                                 | Retrotransposon gag domain [IPR005162] (1)                                                                                                                                     | scaffold_9_mRNA_2430.1          | -                          | -                               |
| GF003209 | 1                            | 0                       | 0                            | 0 Cytokinin riboside 5'-monophosphate phosphoribohydrolase (1) |                                                                                                                                                                                                                                                                                                                                                 | LOG family [IPR031100] (1)                                                                                                                                                     | scaffold_9_mRNA_2429.1          | -                          | -                               |
| GF003208 | 1                            | 0                       | 0                            | 0 Hypothetical protein (1)                                     |                                                                                                                                                                                                                                                                                                                                                 |                                                                                                                                                                                | scaffold_9_mRNA_2428.1          | -                          | -                               |
| GF003207 | 1                            | 0                       | 0                            | 0 Hypothetical protein (1)                                     |                                                                                                                                                                                                                                                                                                                                                 | Aspartic peptidase domain [IPR021109] (1)                                                                                                                                      | scaffold_9_mRNA_2427.1          | -                          | -                               |
| GF003206 | 1                            | 0                       | 0                            | 0 Hypothetical protein (1)                                     |                                                                                                                                                                                                                                                                                                                                                 |                                                                                                                                                                                | scaffold_9_mRNA_2425.1          | -                          | -                               |
| GF003205 | 1                            | 0                       | 0                            | 0 Hypothetical protein (1)                                     |                                                                                                                                                                                                                                                                                                                                                 |                                                                                                                                                                                | scaffold_9_mRNA_2424.1          | -                          | -                               |
| GF003204 | 1                            | 0                       | 0                            | 0 Hypothetical protein (1)                                     |                                                                                                                                                                                                                                                                                                                                                 |                                                                                                                                                                                | scaffold_9_mRNA_2420.1          | -                          | -                               |
| GF003203 | 1                            | 0                       | 0                            | 0 Hypothetical protein (1)                                     |                                                                                                                                                                                                                                                                                                                                                 | Retrotransposon gag domain [IPR005162] (1)                                                                                                                                     | scaffold_9_mRNA_2416.1          | -                          | -                               |
| GF003202 | 1                            | 0                       | 0                            | 0 Cytokinin riboside 5'-monophosphate phosphoribohydrolase (1) |                                                                                                                                                                                                                                                                                                                                                 | LOG family [IPR031100] (1); Cytokinin riboside 5'-monophosphate phosphoribohydrolase LOG [IPR005269] (1)                                                                       | scaffold_9_mRNA_2415.1          | -                          | -                               |
| GF003201 | 1                            | 0                       | 0                            | 0 Hypothetical protein (1)                                     |                                                                                                                                                                                                                                                                                                                                                 |                                                                                                                                                                                | scaffold_9_mRNA_2414.1          | -                          | -                               |
| GF003200 | 1                            | 0                       | 0                            | 0 Gag non-LTR retrotransposase (1)                             | zinc ion binding [GO:0008270 molecular_function] (1); nucleic acid binding [GO:0003676 molecular_function] (1)                                                                                                                                                                                                                                  | Domain of unknown function DUF4283 [IPR025558] (1); Zinc knuckle CX2CX4HX4C [IPR025836] (1); Zinc finger, CCHC-type [IPR001878] (1)                                            | scaffold_9_mRNA_2412.1          | -                          | -                               |
| GF003199 | 1                            | 0                       | 0                            | 0 Hypothetical protein (1)                                     |                                                                                                                                                                                                                                                                                                                                                 |                                                                                                                                                                                | scaffold_9_mRNA_2406.1          | -                          | -                               |
| GF003198 | 1                            | 0                       | 0                            | 0 Cytokinin riboside 5'-monophosphate phosphoribohydrolase (1) |                                                                                                                                                                                                                                                                                                                                                 | LOG family [IPR031100] (1)                                                                                                                                                     | scaffold_9_mRNA_2405.1          | -                          | -                               |
| GF003197 | 1                            | 0                       | 0                            | 0 Hypothetical protein (1)                                     |                                                                                                                                                                                                                                                                                                                                                 |                                                                                                                                                                                | scaffold_9_mRNA_2401.1          | -                          | -                               |
| GF003196 | 1                            | 0                       | 0                            | 0 Hypothetical protein (1)                                     |                                                                                                                                                                                                                                                                                                                                                 |                                                                                                                                                                                | scaffold_9_mRNA_2399.1          | -                          | -                               |
| GF003195 | 1                            | 0                       | 0                            | 0 RNA-directed DNA polymerase (Reverse transcriptase) (1)      |                                                                                                                                                                                                                                                                                                                                                 | Reverse transcriptase domain [IPR000477] (1)                                                                                                                                   | scaffold_9_mRNA_2392.1          | -                          | -                               |
| GF003194 | 1                            | 0                       | 0                            | 0 Hypothetical protein (1)                                     |                                                                                                                                                                                                                                                                                                                                                 |                                                                                                                                                                                | scaffold_9_mRNA_2386.1          | -                          | -                               |
| GF003193 | 1                            | 0                       | 0                            | 0 Hypothetical protein (1)                                     |                                                                                                                                                                                                                                                                                                                                                 |                                                                                                                                                                                | scaffold_9_mRNA_2385.1          | -                          | -                               |
| GF003192 | 1                            | 0                       | 0                            | 0 Hypothetical protein (1)                                     |                                                                                                                                                                                                                                                                                                                                                 |                                                                                                                                                                                | scaffold_9_mRNA_2377.1          | -                          | -                               |
| GF003191 | 1                            | 0                       | 0                            | 0 Cytokinin riboside 5'-monophosphate phosphoribohydrolase (1) |                                                                                                                                                                                                                                                                                                                                                 | Cytokinin riboside 5'-monophosphate phosphoribohydrolase LOG [IPR005269] (1); LOG family [IPR031100] (1)                                                                       | scaffold_9_mRNA_2373.1          | -                          | -                               |
| GF003190 | 1                            | 0                       | 0                            | 0 Hypothetical protein (1)                                     |                                                                                                                                                                                                                                                                                                                                                 |                                                                                                                                                                                | scaffold_9_mRNA_2372.1          | -                          | -                               |
| GF003189 | 1                            | 0                       | 0                            | 0 Hypothetical protein (1)                                     | DNA integration [GO:0015074 biological_process] (1); nucleic acid binding [GO:0003676 molecular_function] (1)                                                                                                                                                                                                                                   | Ribonuclease H-like domain [IPR012337] (1); Integrase, catalytic core [IPR001584] (1); Reverse transcriptase domain [IPR000477] (1); Aspartic peptidase domain [IPR021109] (1) | scaffold_9_mRNA_2371.1          | -                          | -                               |
| GF003188 | 1                            | 0                       | 0                            | 0 Hypothetical protein (1)                                     |                                                                                                                                                                                                                                                                                                                                                 |                                                                                                                                                                                | scaffold_9_mRNA_2370.1          | -                          | -                               |
| GF003187 | 1                            | 0                       | 0                            | 0 Hypothetical protein (1)                                     |                                                                                                                                                                                                                                                                                                                                                 |                                                                                                                                                                                | scaffold_9_mRNA_2367.1          | -                          | -                               |
| GF003186 | 1                            | 0                       | 0                            | 0 Hypothetical protein (1)                                     |                                                                                                                                                                                                                                                                                                                                                 |                                                                                                                                                                                | scaffold_9_mRNA_2364.1          | -                          | -                               |
| GF003185 | 1                            | 0                       | 0                            | 0 Hypothetical protein (1)                                     |                                                                                                                                                                                                                                                                                                                                                 |                                                                                                                                                                                | scaffold_9_mRNA_2363.1          | -                          | -                               |
| GF003184 | 1                            | 0                       | 0                            | 0 Hypothetical protein (1)                                     |                                                                                                                                                                                                                                                                                                                                                 | Viral movement protein [IPR028919] (1)                                                                                                                                         | scaffold_9_mRNA_2358.1          | -                          | -                               |
| GF003183 | 1                            | 0                       | 0                            | 0 Hypothetical protein (1)                                     |                                                                                                                                                                                                                                                                                                                                                 |                                                                                                                                                                                | scaffold_9_mRNA_2345.1          | -                          | -                               |
| GF003182 | 1                            | 0                       | 0                            | 0 Hypothetical protein (1)                                     |                                                                                                                                                                                                                                                                                                                                                 |                                                                                                                                                                                | scaffold_9_mRNA_2342.1          | -                          | -                               |
| GF003181 | 1                            | 0                       | 0                            | 0 Hypothetical protein (1)                                     |                                                                                                                                                                                                                                                                                                                                                 |                                                                                                                                                                                | scaffold_9_mRNA_2340.1          | -                          | -                               |



| ID        | Num. in <i>C. clementiae</i> | Num in <i>C. uchiha</i> | Num in <i>P. trifoliata</i> | Note                                                           | GO                                                                                                                                                                                                                | InterPro                                                                                                                                                                      | Members in <i>C. clementiae</i> | Members in <i>C. uchiha</i> | Members in <i>P. trifoliata</i> |
|-----------|------------------------------|-------------------------|-----------------------------|----------------------------------------------------------------|-------------------------------------------------------------------------------------------------------------------------------------------------------------------------------------------------------------------|-------------------------------------------------------------------------------------------------------------------------------------------------------------------------------|---------------------------------|-----------------------------|---------------------------------|
| GF0033180 | 1                            | 0                       | 0                           | 0 Hypothetical protein (1)                                     |                                                                                                                                                                                                                   | Reverse transcriptase domain [IPR000477] (1)                                                                                                                                  | scaffold_9_mRNA_2333.1          | -                           | -                               |
| GF0033179 | 1                            | 0                       | 0                           | 0 Hypothetical protein (1)                                     |                                                                                                                                                                                                                   |                                                                                                                                                                               | scaffold_9_mRNA_2323.1          | -                           | -                               |
| GF0033178 | 1                            | 0                       | 0                           | 0 Hypothetical protein (1)                                     |                                                                                                                                                                                                                   |                                                                                                                                                                               | scaffold_9_mRNA_2320.1          | -                           | -                               |
| GF0033177 | 1                            | 0                       | 0                           | 0 Hypothetical protein (1)                                     |                                                                                                                                                                                                                   |                                                                                                                                                                               | scaffold_9_mRNA_232.1           | -                           | -                               |
| GF0033176 | 1                            | 0                       | 0                           | 0 Hypothetical protein (1)                                     |                                                                                                                                                                                                                   |                                                                                                                                                                               | scaffold_9_mRNA_2317.1          | -                           | -                               |
| GF0033175 | 1                            | 0                       | 0                           | 0 Hypothetical protein (1)                                     |                                                                                                                                                                                                                   |                                                                                                                                                                               | scaffold_9_mRNA_231.1           | -                           | -                               |
| GF0033174 | 1                            | 0                       | 0                           | 0 Putative RNA-directed DNA polymerase (1)                     |                                                                                                                                                                                                                   | Reverse transcriptase domain [IPR000477] (1)                                                                                                                                  | scaffold_9_mRNA_2305.1          | -                           | -                               |
| GF0033173 | 1                            | 0                       | 0                           | 0 Hypothetical protein (1)                                     |                                                                                                                                                                                                                   |                                                                                                                                                                               | scaffold_9_mRNA_2301.1          | -                           | -                               |
| GF0033172 | 1                            | 0                       | 0                           | 0 Monosaccharide transport protein (1)                         |                                                                                                                                                                                                                   |                                                                                                                                                                               | scaffold_9_mRNA_230.1           | -                           | -                               |
| GF0033171 | 1                            | 0                       | 0                           | 0 Hypothetical protein (1)                                     |                                                                                                                                                                                                                   | Reverse transcriptase domain [IPR000477] (1)                                                                                                                                  | scaffold_9_mRNA_2299.1          | -                           | -                               |
| GF0033170 | 1                            | 0                       | 0                           | 0 Hypothetical protein (1)                                     |                                                                                                                                                                                                                   |                                                                                                                                                                               | scaffold_9_mRNA_2288.1          | -                           | -                               |
| GF0033169 | 1                            | 0                       | 0                           | 0 Hypothetical protein (1)                                     | protein dimerization activity [GO:0046983 molecular_function] (1); nucleic acid binding [GO:0003676 molecular_function] (1)                                                                                       | Ribonuclease H-like domain [IPR012337] (1); HAT, C-terminal dimerisation domain [IPR008906] (1)                                                                               | scaffold_9_mRNA_2284.1          | -                           | -                               |
| GF0033168 | 1                            | 0                       | 0                           | 0 Hypothetical protein (1)                                     |                                                                                                                                                                                                                   |                                                                                                                                                                               | scaffold_9_mRNA_2283.1          | -                           | -                               |
| GF0033167 | 1                            | 0                       | 0                           | 0 Hypothetical protein (1)                                     |                                                                                                                                                                                                                   |                                                                                                                                                                               | scaffold_9_mRNA_2282.1          | -                           | -                               |
| GF0033166 | 1                            | 0                       | 0                           | 0 Hypothetical protein (1)                                     |                                                                                                                                                                                                                   |                                                                                                                                                                               | scaffold_9_mRNA_2281.1          | -                           | -                               |
| GF0033165 | 1                            | 0                       | 0                           | 0 Hypothetical protein (1)                                     | nucleic acid binding [GO:0003676 molecular_function] (1)                                                                                                                                                          | Ribonuclease H-like domain [IPR012337] (1)                                                                                                                                    | scaffold_9_mRNA_2278.1          | -                           | -                               |
| GF0033164 | 1                            | 0                       | 0                           | 0 Hypothetical protein (1)                                     |                                                                                                                                                                                                                   |                                                                                                                                                                               | scaffold_9_mRNA_2275.1          | -                           | -                               |
| GF0033163 | 1                            | 0                       | 0                           | 0 Hypothetical protein (1)                                     |                                                                                                                                                                                                                   | Reverse transcriptase domain [IPR000477] (1)                                                                                                                                  | scaffold_9_mRNA_2269.1          | -                           | -                               |
| GF0033162 | 1                            | 0                       | 0                           | 0 Hypothetical protein (1)                                     |                                                                                                                                                                                                                   |                                                                                                                                                                               | scaffold_9_mRNA_2267.1          | -                           | -                               |
| GF0033161 | 1                            | 0                       | 0                           | 0 Hypothetical protein (1)                                     |                                                                                                                                                                                                                   |                                                                                                                                                                               | scaffold_9_mRNA_2265.1          | -                           | -                               |
| GF0033160 | 1                            | 0                       | 0                           | 0 Hypothetical protein (1)                                     |                                                                                                                                                                                                                   |                                                                                                                                                                               | scaffold_9_mRNA_2263.1          | -                           | -                               |
| GF0033159 | 1                            | 0                       | 0                           | 0 Hypothetical protein (1)                                     |                                                                                                                                                                                                                   |                                                                                                                                                                               | scaffold_9_mRNA_2262.1          | -                           | -                               |
| GF0033158 | 1                            | 0                       | 0                           | 0 Hypothetical protein (1)                                     |                                                                                                                                                                                                                   |                                                                                                                                                                               | scaffold_9_mRNA_2261.1          | -                           | -                               |
| GF0033157 | 1                            | 0                       | 0                           | 0 Hypothetical protein (1)                                     | nucleic acid binding [GO:0003676 molecular_function] (1); zinc ion binding [GO:0008270 molecular_function] (1)                                                                                                    | Zinc finger, CCHC-type [IPR001878] (1)                                                                                                                                        | scaffold_9_mRNA_226.1           | -                           | -                               |
| GF0033156 | 1                            | 0                       | 0                           | 0 Hypothetical protein (1)                                     |                                                                                                                                                                                                                   |                                                                                                                                                                               | scaffold_9_mRNA_2254.1          | -                           | -                               |
| GF0033155 | 1                            | 0                       | 0                           | 0 Hypothetical protein (1)                                     |                                                                                                                                                                                                                   |                                                                                                                                                                               | scaffold_9_mRNA_2253.1          | -                           | -                               |
| GF0033154 | 1                            | 0                       | 0                           | 0 Hypothetical protein (1)                                     |                                                                                                                                                                                                                   |                                                                                                                                                                               | scaffold_9_mRNA_2251.1          | -                           | -                               |
| GF0033153 | 1                            | 0                       | 0                           | 0 Hypothetical protein (1)                                     |                                                                                                                                                                                                                   |                                                                                                                                                                               | scaffold_9_mRNA_2250.1          | -                           | -                               |
| GF0033152 | 1                            | 0                       | 0                           | 0 Hypothetical protein (1)                                     |                                                                                                                                                                                                                   |                                                                                                                                                                               | scaffold_9_mRNA_2248.1          | -                           | -                               |
| GF0033151 | 1                            | 0                       | 0                           | 0 Hypothetical protein (1)                                     |                                                                                                                                                                                                                   | Viral movement protein [IPR028919] (1)                                                                                                                                        | scaffold_9_mRNA_2247.1          | -                           | -                               |
| GF0033150 | 1                            | 0                       | 0                           | 0 Hypothetical protein (1)                                     |                                                                                                                                                                                                                   |                                                                                                                                                                               | scaffold_9_mRNA_2246.1          | -                           | -                               |
| GF0033149 | 1                            | 0                       | 0                           | 0 Hypothetical protein (1)                                     |                                                                                                                                                                                                                   |                                                                                                                                                                               | scaffold_9_mRNA_2245.1          | -                           | -                               |
| GF0033148 | 1                            | 0                       | 0                           | 0 Cytokinin riboside 5'-monophosphate phosphoribohydrolase (1) |                                                                                                                                                                                                                   | LOG family [IPR031100] (1); Cytokinin riboside 5'-monophosphate phosphoribohydrolase LOG [IPR005269] (1)                                                                      | scaffold_9_mRNA_2244.1          | -                           | -                               |
| GF0033147 | 1                            | 0                       | 0                           | 0 Hypothetical protein (1)                                     |                                                                                                                                                                                                                   |                                                                                                                                                                               | scaffold_9_mRNA_2243.1          | -                           | -                               |
| GF0033146 | 1                            | 0                       | 0                           | 0 Hypothetical protein (1)                                     |                                                                                                                                                                                                                   | Paramyxovirus antigen Ma [IPR026523] (1); Reverse transcriptase domain [IPR000477] (1)                                                                                        | scaffold_9_mRNA_2240.1          | -                           | -                               |
| GF0033145 | 1                            | 0                       | 0                           | 0 Hypothetical protein (1)                                     | aspartic-type endopeptidase activity [GO:0004190 molecular_function] (1); proteolysis [GO:0006508 biological_process] (1)                                                                                         | Peptidase A2A, retrovirus, catalytic [IPR001995] (1)                                                                                                                          | scaffold_9_mRNA_2236.1          | -                           | -                               |
| GF0033144 | 1                            | 0                       | 0                           | 0 Hypothetical protein (1)                                     |                                                                                                                                                                                                                   |                                                                                                                                                                               | scaffold_9_mRNA_2235.1          | -                           | -                               |
| GF0033143 | 1                            | 0                       | 0                           | 0 Hypothetical protein (1)                                     |                                                                                                                                                                                                                   |                                                                                                                                                                               | scaffold_9_mRNA_2232.1          | -                           | -                               |
| GF0033142 | 1                            | 0                       | 0                           | 0 Hypothetical protein (1)                                     |                                                                                                                                                                                                                   |                                                                                                                                                                               | scaffold_9_mRNA_2231.1          | -                           | -                               |
| GF0033141 | 1                            | 0                       | 0                           | 0 Hypothetical protein (1)                                     |                                                                                                                                                                                                                   |                                                                                                                                                                               | scaffold_9_mRNA_2227.1          | -                           | -                               |
| GF0033140 | 1                            | 0                       | 0                           | 0 Hypothetical protein (1)                                     |                                                                                                                                                                                                                   |                                                                                                                                                                               | scaffold_9_mRNA_2226.1          | -                           | -                               |
| GF0033139 | 1                            | 0                       | 0                           | 0 Hypothetical protein (1)                                     |                                                                                                                                                                                                                   |                                                                                                                                                                               | scaffold_9_mRNA_2225.1          | -                           | -                               |
| GF0033138 | 1                            | 0                       | 0                           | 0 Hypothetical protein (1)                                     |                                                                                                                                                                                                                   |                                                                                                                                                                               | scaffold_9_mRNA_2224.1          | -                           | -                               |
| GF0033137 | 1                            | 0                       | 0                           | 0 Hypothetical protein (1)                                     | aspartic-type endopeptidase activity [GO:0004190 molecular_function] (1); proteolysis [GO:0006508 biological_process] (1)                                                                                         | Aspartic peptidase domain [IPR021109] (1); Reverse transcriptase domain [IPR000477] (1); Peptidase A2A, retrovirus, catalytic [IPR001995] (1)                                 | scaffold_9_mRNA_2223.1          | -                           | -                               |
| GF0033136 | 1                            | 0                       | 0                           | 0 Hypothetical protein (1)                                     | nucleic acid binding [GO:0003676 molecular_function] (1); DNA integration [GO:0015074 biological_process] (1)                                                                                                     | Integrase, catalytic core [IPR001584] (1); Ribonuclease H-like domain [IPR012337] (1)                                                                                         | scaffold_9_mRNA_2222.1          | -                           | -                               |
| GF0033135 | 1                            | 0                       | 0                           | 0 Hypothetical protein (1)                                     |                                                                                                                                                                                                                   |                                                                                                                                                                               | scaffold_9_mRNA_2221.1          | -                           | -                               |
| GF0033134 | 1                            | 0                       | 0                           | 0 Hypothetical protein (1)                                     |                                                                                                                                                                                                                   | Reverse transcriptase domain [IPR000477] (1)                                                                                                                                  | scaffold_9_mRNA_2220.1          | -                           | -                               |
| GF0033133 | 1                            | 0                       | 0                           | 0 Hypothetical protein (1)                                     | nucleic acid binding [GO:0003676 molecular_function] (1)                                                                                                                                                          | Ribonuclease H-like domain [IPR012337] (1)                                                                                                                                    | scaffold_9_mRNA_2216.1          | -                           | -                               |
| GF0033132 | 1                            | 0                       | 0                           | 0 Phosphoglycan, water dikinase (1)                            | ATP binding [GO:0005524 molecular_function] (1); catalytic activity [GO:0003824 molecular_function] (1); phosphorylation [GO:0016310 biological_process] (1); kinase activity [GO:0016301 molecular_function] (1) | Pyruvate phosphate dikinase, PEP/pyruvate-binding [IPR002192] (1); ATP-grasp fold, subdomain 1 [IPR013815] (1)                                                                | scaffold_9_mRNA_2214.1          | -                           | -                               |
| GF0033131 | 1                            | 0                       | 0                           | 0 Hypothetical protein (1)                                     |                                                                                                                                                                                                                   | LOG family [IPR031100] (1); Retrotransposon gag domain [IPR005162] (1)                                                                                                        | scaffold_9_mRNA_2210.1          | -                           | -                               |
| GF0033130 | 1                            | 0                       | 0                           | 0 Hypothetical protein (1)                                     |                                                                                                                                                                                                                   |                                                                                                                                                                               | scaffold_9_mRNA_2207.1          | -                           | -                               |
| GF0033129 | 1                            | 0                       | 0                           | 0 Hypothetical protein (1)                                     |                                                                                                                                                                                                                   |                                                                                                                                                                               | scaffold_9_mRNA_2202.1          | -                           | -                               |
| GF0033128 | 1                            | 0                       | 0                           | 0 Hypothetical protein (1)                                     |                                                                                                                                                                                                                   |                                                                                                                                                                               | scaffold_9_mRNA_2201.1          | -                           | -                               |
| GF0033127 | 1                            | 0                       | 0                           | 0 Hypothetical protein (1)                                     | zinc ion binding [GO:0008270 molecular_function] (1); nucleic acid binding [GO:0003676 molecular_function] (1)                                                                                                    | Zinc knuckle CX2CX4HX4C [IPR025836] (1); Zinc finger, CCHC-type [IPR001878] (1)                                                                                               | scaffold_9_mRNA_2200.1          | -                           | -                               |
| GF0033126 | 1                            | 0                       | 0                           | 0 Hypothetical protein (1)                                     |                                                                                                                                                                                                                   | Endonuclease/ctonuclease-phosphatase [IPR005135] (1)                                                                                                                          | scaffold_9_mRNA_2199.1          | -                           | -                               |
| GF0033125 | 1                            | 0                       | 0                           | 0 Hypothetical protein (1)                                     |                                                                                                                                                                                                                   |                                                                                                                                                                               | scaffold_9_mRNA_2189.1          | -                           | -                               |
| GF0033124 | 1                            | 0                       | 0                           | 0 Hypothetical protein (1)                                     |                                                                                                                                                                                                                   |                                                                                                                                                                               | scaffold_9_mRNA_2187.1          | -                           | -                               |
| GF0033123 | 1                            | 0                       | 0                           | 0 Hypothetical protein (1)                                     |                                                                                                                                                                                                                   |                                                                                                                                                                               | scaffold_9_mRNA_2181.1          | -                           | -                               |
| GF0033122 | 1                            | 0                       | 0                           | 0 Hypothetical protein (1)                                     | cysteine-type peptidase activity [GO:0006234 molecular_function] (1); proteolysis [GO:0006508 biological_process] (1)                                                                                             | Ulp1 protease family, C-terminal catalytic domain [IPR003653] (1)                                                                                                             | scaffold_9_mRNA_2164.1          | -                           | -                               |
| GF0033121 | 1                            | 0                       | 0                           | 0 Hypothetical protein (1)                                     |                                                                                                                                                                                                                   |                                                                                                                                                                               | scaffold_9_mRNA_2159.1          | -                           | -                               |
| GF0033120 | 1                            | 0                       | 0                           | 0 Hypothetical protein (1)                                     |                                                                                                                                                                                                                   |                                                                                                                                                                               | scaffold_9_mRNA_2153.1          | -                           | -                               |
| GF0033119 | 1                            | 0                       | 0                           | 0 Transposase (1)                                              | protein dimerization activity [GO:0046983 molecular_function] (1); nucleic acid binding [GO:0003676 molecular_function] (1); DNA binding [GO:0003677 molecular_function] (1)                                      | Zinc finger, BED-type [IPR003656] (1); Ribonuclease H-like domain [IPR012337] (1); Zinc finger C2H2-type [IPR013087] (1); HAT, C-terminal dimerisation domain [IPR008906] (1) | scaffold_9_mRNA_2144.1          | -                           | -                               |
| GF0033118 | 1                            | 0                       | 0                           | 0 Hypothetical protein (1)                                     |                                                                                                                                                                                                                   |                                                                                                                                                                               | scaffold_9_mRNA_2143.1          | -                           | -                               |
| GF0033117 | 1                            | 0                       | 0                           | 0 Hypothetical protein (1)                                     |                                                                                                                                                                                                                   |                                                                                                                                                                               | scaffold_9_mRNA_2141.1          | -                           | -                               |
| GF0033116 | 1                            | 0                       | 0                           | 0 Hypothetical protein (1)                                     |                                                                                                                                                                                                                   |                                                                                                                                                                               | scaffold_9_mRNA_2140.1          | -                           | -                               |
| GF0033115 | 1                            | 0                       | 0                           | 0 Hypothetical protein (1)                                     |                                                                                                                                                                                                                   |                                                                                                                                                                               | scaffold_9_mRNA_2136.1          | -                           | -                               |
| GF0033114 | 1                            | 0                       | 0                           | 0 Hypothetical protein (1)                                     |                                                                                                                                                                                                                   |                                                                                                                                                                               | scaffold_9_mRNA_2132.1          | -                           | -                               |
| GF0033113 | 1                            | 0                       | 0                           | 0 Hypothetical protein (1)                                     | regulation of transcription, DNA-templated [GO:0006355 biological_process] (1)                                                                                                                                    | FHY3/FAR1 family [IPR031052] (1)                                                                                                                                              | scaffold_9_mRNA_2129.1          | -                           | -                               |
| GF0033112 | 1                            | 0                       | 0                           | 0 Hypothetical protein (1)                                     |                                                                                                                                                                                                                   |                                                                                                                                                                               | scaffold_9_mRNA_2122.1          | -                           | -                               |
| GF0033111 | 1                            | 0                       | 0                           | 0 Hypothetical protein (1)                                     | zinc ion binding [GO:0008270 molecular_function] (1)                                                                                                                                                              | Zinc finger, PMZ-type [IPR006564] (1)                                                                                                                                         | scaffold_9_mRNA_2121.1          | -                           | -                               |
| GF0033110 | 1                            | 0                       | 0                           | 0 Hypothetical protein (1)                                     |                                                                                                                                                                                                                   |                                                                                                                                                                               | scaffold_9_mRNA_2099.1          | -                           | -                               |
| GF0033109 | 1                            | 0                       | 0                           | 0 Hypothetical protein (1)                                     |                                                                                                                                                                                                                   |                                                                                                                                                                               | scaffold_9_mRNA_2098.1          | -                           | -                               |
| GF0033108 | 1                            | 0                       | 0                           | 0 Cytokinin riboside 5'-monophosphate phosphoribohydrolase (1) |                                                                                                                                                                                                                   | LOG family [IPR031100] (1)                                                                                                                                                    | scaffold_9_mRNA_2097.1          | -                           | -                               |
| GF0033107 | 1                            | 0                       | 0                           | 0 Hypothetical protein (1)                                     |                                                                                                                                                                                                                   |                                                                                                                                                                               | scaffold_9_mRNA_2095.1          | -                           | -                               |
| GF0033106 | 1                            | 0                       | 0                           | 0 Hypothetical protein (1)                                     |                                                                                                                                                                                                                   | LOG family [IPR031100] (1)                                                                                                                                                    | scaffold_9_mRNA_2094.1          | -                           | -                               |
| GF0033105 | 1                            | 0                       | 0                           | 0 Hypothetical protein (1)                                     |                                                                                                                                                                                                                   |                                                                                                                                                                               | scaffold_9_mRNA_2088.1          | -                           | -                               |
| GF0033104 | 1                            | 0                       | 0                           | 0 Hypothetical protein (1)                                     |                                                                                                                                                                                                                   |                                                                                                                                                                               | scaffold_9_mRNA_2087.1          | -                           | -                               |
| GF0033103 | 1                            | 0                       | 0                           | 0 Hypothetical protein (1)                                     |                                                                                                                                                                                                                   |                                                                                                                                                                               | scaffold_9_mRNA_2084.1          | -                           | -                               |
| GF0033102 | 1                            | 0                       | 0                           | 0 Hypothetical protein (1)                                     | nucleic acid binding [GO:0003676 molecular_function] (1); zinc ion binding [GO:0008270 molecular_function] (1)                                                                                                    | Zinc knuckle CX2CX4HX4C [IPR025836] (1); Zinc finger, CCHC-type [IPR001878] (1)                                                                                               | scaffold_9_mRNA_2082.1          | -                           | -                               |
| GF0033101 | 1                            | 0                       | 0                           | 0 Hypothetical protein (1)                                     |                                                                                                                                                                                                                   |                                                                                                                                                                               | scaffold_9_mRNA_2080.1          | -                           | -                               |
| GF0033100 | 1                            | 0                       | 0                           | 0 Hypothetical protein (1)                                     |                                                                                                                                                                                                                   |                                                                                                                                                                               | scaffold_9_mRNA_2074.1          | -                           | -                               |
| GF0033099 | 1                            | 0                       | 0                           | 0 Hypothetical protein (1)                                     |                                                                                                                                                                                                                   |                                                                                                                                                                               | scaffold_9_mRNA_2058.1          | -                           | -                               |
| GF0033098 | 1                            | 0                       | 0                           | 0 Hypothetical protein (1)                                     |                                                                                                                                                                                                                   |                                                                                                                                                                               | scaffold_9_mRNA_2053.1          | -                           | -                               |
| GF0033097 | 1                            | 0                       | 0                           | 0 Hypothetical protein (1)                                     |                                                                                                                                                                                                                   |                                                                                                                                                                               | scaffold_9_mRNA_2051.1          | -                           | -                               |
| GF0033096 | 1                            | 0                       | 0                           | 0 Cytokinin riboside 5'-monophosphate phosphoribohydrolase (1) |                                                                                                                                                                                                                   | LOG family [IPR031100] (1)                                                                                                                                                    | scaffold_9_mRNA_2049.1          | -                           | -                               |

| ID        | Num. in <i>C. clementiae</i> | Num. in <i>C. uchiha</i> | Num. in <i>P. trifoliate</i> | Note                                                                      | GO                                                                                                                                                                                                                       | InterPro                                                                                                                                                                                                                                                                                       | Members in <i>C. clementiae</i> | Members in <i>C. uchiha</i> | Members in <i>P. trifoliate</i> |
|-----------|------------------------------|--------------------------|------------------------------|---------------------------------------------------------------------------|--------------------------------------------------------------------------------------------------------------------------------------------------------------------------------------------------------------------------|------------------------------------------------------------------------------------------------------------------------------------------------------------------------------------------------------------------------------------------------------------------------------------------------|---------------------------------|-----------------------------|---------------------------------|
| GF0033095 | 1                            | 0                        | 0                            | Cytokinin riboside 5'-monophosphate phosphoribohydrolase (1)              |                                                                                                                                                                                                                          | LOG family [IPR031100] (1); Cytokinin riboside 5'-monophosphate phosphoribohydrolase LOG [IPR005269] (1)                                                                                                                                                                                       | scaffold_9_mRNA_2048.1          | -                           | -                               |
| GF0033094 | 1                            | 0                        | 0                            | Isoflavone 7-O-methyltransferase (1)                                      | O-methyltransferase activity [GO:0008171 molecular_function] (1); methyltransferase activity [GO:0008168 molecular_function] (1)                                                                                         | O-methyltransferase COMT-type [IPR016461] (1); O-methyltransferase family 2 [IPR010771] (1); S-adenosyl-L-methionine-dependent methyltransferase [IPR029063] (1)                                                                                                                               | scaffold_9_mRNA_2046.1          | -                           | -                               |
| GF0033093 | 1                            | 0                        | 0                            | Hypothetical protein (1)                                                  |                                                                                                                                                                                                                          |                                                                                                                                                                                                                                                                                                | scaffold_9_mRNA_2044.1          | -                           | -                               |
| GF0033092 | 1                            | 0                        | 0                            | Hypothetical protein (1)                                                  |                                                                                                                                                                                                                          | Harbinger transposase-derived nuclease domain [IPR027806] (1)                                                                                                                                                                                                                                  | scaffold_9_mRNA_2031.1          | -                           | -                               |
| GF0033091 | 1                            | 0                        | 0                            | Hypothetical protein (1)                                                  |                                                                                                                                                                                                                          |                                                                                                                                                                                                                                                                                                | scaffold_9_mRNA_2010.1          | -                           | -                               |
| GF0033090 | 1                            | 0                        | 0                            | Hypothetical protein (1)                                                  |                                                                                                                                                                                                                          |                                                                                                                                                                                                                                                                                                | scaffold_9_mRNA_2005.1          | -                           | -                               |
| GF0033089 | 1                            | 0                        | 0                            | Hypothetical protein (1)                                                  |                                                                                                                                                                                                                          |                                                                                                                                                                                                                                                                                                | scaffold_9_mRNA_1999.1          | -                           | -                               |
| GF0033088 | 1                            | 0                        | 0                            | Cytokinin riboside 5'-monophosphate phosphoribohydrolase (1)              |                                                                                                                                                                                                                          | LOG family [IPR031100] (1)                                                                                                                                                                                                                                                                     | scaffold_9_mRNA_1998.1          | -                           | -                               |
| GF0033087 | 1                            | 0                        | 0                            | Hypothetical protein (1)                                                  |                                                                                                                                                                                                                          |                                                                                                                                                                                                                                                                                                | scaffold_9_mRNA_1996.1          | -                           | -                               |
| GF0033086 | 1                            | 0                        | 0                            | CwD-like family protein, putative isoform 3 (1)                           | catalytic activity [GO:0003824 molecular_function] (1)                                                                                                                                                                   | CwD-like protein, C-terminal domain-2 [IPR006767] (1); CwF19-like, C-terminal domain-1 [IPR006768] (1); HIT-like domain [IPR011146] (1)                                                                                                                                                        | scaffold_9_mRNA_1995.1          | -                           | -                               |
| GF0033085 | 1                            | 0                        | 0                            | Hypothetical protein (1)                                                  |                                                                                                                                                                                                                          |                                                                                                                                                                                                                                                                                                | scaffold_9_mRNA_1992.1          | -                           | -                               |
| GF0033084 | 1                            | 0                        | 0                            | Hypothetical protein (1)                                                  | response to wounding [GO:0009611 biological_process] (1); serine-type endopeptidase inhibitor activity [GO:0004867 molecular_function] (1)                                                                               | Proteinase inhibitor H13, potato inhibitor I [IPR008641] (1); Reverse transcriptase domain [IPR004077] (1)                                                                                                                                                                                     | scaffold_9_mRNA_1991.1          | -                           | -                               |
| GF0033083 | 1                            | 0                        | 0                            | Cytokinin riboside 5'-monophosphate phosphoribohydrolase (1)              |                                                                                                                                                                                                                          |                                                                                                                                                                                                                                                                                                | scaffold_9_mRNA_1987.1          | -                           | -                               |
| GF0033082 | 1                            | 0                        | 0                            | Hypothetical protein (1)                                                  |                                                                                                                                                                                                                          |                                                                                                                                                                                                                                                                                                | scaffold_9_mRNA_1986.1          | -                           | -                               |
| GF0033081 | 1                            | 0                        | 0                            | Hypothetical protein (1)                                                  |                                                                                                                                                                                                                          |                                                                                                                                                                                                                                                                                                | scaffold_9_mRNA_1985.1          | -                           | -                               |
| GF0033080 | 1                            | 0                        | 0                            | Hypothetical protein (1)                                                  |                                                                                                                                                                                                                          |                                                                                                                                                                                                                                                                                                | scaffold_9_mRNA_1983.1          | -                           | -                               |
| GF0033079 | 1                            | 0                        | 0                            | Disease resistance family protein / LRR family protein, putative (1)      | cysteine-type peptidase activity [GO:0008234 molecular_function] (1); protein binding [GO:0005515 molecular_function] (1); proteolysis [GO:0006508 biological_process] (1)                                               | Leucine-rich repeat domain, L domain-like [IPR032675] (1); Leucine-rich repeat, typical subtype [IPR003591] (1); Leucine-rich repeat [IPR001611] (1); Leucine-rich repeat-containing N-terminal, plant-type [IPR013210] (1); Ulp1 protease family, C-terminal catalytic domain [IPR003653] (1) | scaffold_9_mRNA_1982.1          | -                           | -                               |
| GF0033078 | 1                            | 0                        | 0                            | Hypothetical protein (1)                                                  |                                                                                                                                                                                                                          |                                                                                                                                                                                                                                                                                                | scaffold_9_mRNA_1980.1          | -                           | -                               |
| GF0033077 | 1                            | 0                        | 0                            | Cytokinin riboside 5'-monophosphate phosphoribohydrolase (1)              |                                                                                                                                                                                                                          | Cytokinin riboside 5'-monophosphate phosphoribohydrolase LOG [IPR005269] (1); LOG family [IPR031100] (1)                                                                                                                                                                                       | scaffold_9_mRNA_1979.1          | -                           | -                               |
| GF0033076 | 1                            | 0                        | 0                            | Hypothetical protein (1)                                                  |                                                                                                                                                                                                                          | Retrotransposon gag domain [IPR005162] (1)                                                                                                                                                                                                                                                     | scaffold_9_mRNA_1978.1          | -                           | -                               |
| GF0033075 | 1                            | 0                        | 0                            | Hypothetical protein (1)                                                  |                                                                                                                                                                                                                          |                                                                                                                                                                                                                                                                                                | scaffold_9_mRNA_1970.1          | -                           | -                               |
| GF0033074 | 1                            | 0                        | 0                            | Hypothetical protein (1)                                                  | nucleic acid binding [GO:0003676 molecular_function] (1); zinc ion binding [GO:0008270 molecular_function] (1)                                                                                                           | Zinc finger, CCHC-type [IPR001878] (1)                                                                                                                                                                                                                                                         | scaffold_9_mRNA_1969.1          | -                           | -                               |
| GF0033073 | 1                            | 0                        | 0                            | Hypothetical protein (1)                                                  |                                                                                                                                                                                                                          | PGF domain [IPR026961] (1)                                                                                                                                                                                                                                                                     | scaffold_9_mRNA_1968.1          | -                           | -                               |
| GF0033072 | 1                            | 0                        | 0                            | Hypothetical protein (1)                                                  | nucleic acid binding [GO:0003676 molecular_function] (1); regulation of transcription, DNA-templated [GO:0006355 biological_process] (1); zinc ion binding [GO:0008270 molecular_function] (1)                           | FAR1 DNA binding domain [IPR004330] (1); Zinc finger, CCHC-type [IPR001878] (1); FHY3/FAR1 family [IPR031052] (1)                                                                                                                                                                              | scaffold_9_mRNA_1967.1          | -                           | -                               |
| GF0033071 | 1                            | 0                        | 0                            | Hypothetical protein (1)                                                  |                                                                                                                                                                                                                          |                                                                                                                                                                                                                                                                                                | scaffold_9_mRNA_1965.1          | -                           | -                               |
| GF0033070 | 1                            | 0                        | 0                            | Hypothetical protein (1)                                                  |                                                                                                                                                                                                                          |                                                                                                                                                                                                                                                                                                | scaffold_9_mRNA_1962.1          | -                           | -                               |
| GF0033069 | 1                            | 0                        | 0                            | Hypothetical protein (1)                                                  |                                                                                                                                                                                                                          |                                                                                                                                                                                                                                                                                                | scaffold_9_mRNA_1961.1          | -                           | -                               |
| GF0033068 | 1                            | 0                        | 0                            | Hypothetical protein (1)                                                  |                                                                                                                                                                                                                          |                                                                                                                                                                                                                                                                                                | scaffold_9_mRNA_1953.1          | -                           | -                               |
| GF0033067 | 1                            | 0                        | 0                            | Hypothetical protein (1)                                                  |                                                                                                                                                                                                                          | Bud13 [IPR018609] (1)                                                                                                                                                                                                                                                                          | scaffold_9_mRNA_1949.1          | -                           | -                               |
| GF0033066 | 1                            | 0                        | 0                            | Hypothetical protein (1)                                                  |                                                                                                                                                                                                                          |                                                                                                                                                                                                                                                                                                | scaffold_9_mRNA_1947.1          | -                           | -                               |
| GF0033065 | 1                            | 0                        | 0                            | LRR receptor-like kinase (1)                                              | protein binding [GO:0005515 molecular_function] (1)                                                                                                                                                                      | Leucine-rich repeat domain, L domain-like [IPR032675] (1); Leucine-rich repeat, typical subtype [IPR003591] (1); Leucine-rich repeat [IPR001611] (1)                                                                                                                                           | scaffold_9_mRNA_1944.1          | -                           | -                               |
| GF0033064 | 1                            | 0                        | 0                            | Caffeic acid O-methyltransferase (1)                                      | O-methyltransferase activity [GO:0008171 molecular_function] (1); protein dimerization activity [GO:0046983 molecular_function] (1); methyltransferase activity [GO:0008168 molecular_function] (1)                      | S-adenosyl-L-methionine-dependent methyltransferase [IPR029063] (1); Plant methyltransferase dimerisation [IPR012967] (1); O-methyltransferase COMT-type [IPR016461] (1); O-methyltransferase family 2 [IPR010771] (1); Winged helix-helix DNA-binding domain [IPR011991] (1)                  | scaffold_9_mRNA_1941.1          | -                           | -                               |
| GF0033063 | 1                            | 0                        | 0                            | Hypothetical protein (1)                                                  |                                                                                                                                                                                                                          |                                                                                                                                                                                                                                                                                                | scaffold_9_mRNA_1940.1          | -                           | -                               |
| GF0033062 | 1                            | 0                        | 0                            | Cytokinin riboside 5'-monophosphate phosphoribohydrolase (1)              |                                                                                                                                                                                                                          | LOG family [IPR031100] (1)                                                                                                                                                                                                                                                                     | scaffold_9_mRNA_1939.1          | -                           | -                               |
| GF0033061 | 1                            | 0                        | 0                            | Hypothetical protein (1)                                                  |                                                                                                                                                                                                                          | Metallo-dependent phosphatase-like [IPR029052] (1)                                                                                                                                                                                                                                             | scaffold_9_mRNA_1937.1          | -                           | -                               |
| GF0033060 | 1                            | 0                        | 0                            | Poly(nucleoside) transferase, ribonuclease H-like superfamily protein (1) | nucleic acid binding [GO:0003676 molecular_function] (1)                                                                                                                                                                 | Ribonuclease H-like domain [IPR012337] (1)                                                                                                                                                                                                                                                     | scaffold_9_mRNA_1933.1          | -                           | -                               |
| GF0033059 | 1                            | 0                        | 0                            | Hypothetical protein (1)                                                  |                                                                                                                                                                                                                          |                                                                                                                                                                                                                                                                                                | scaffold_9_mRNA_1923.1          | -                           | -                               |
| GF0033058 | 1                            | 0                        | 0                            | Hypothetical protein (1)                                                  |                                                                                                                                                                                                                          |                                                                                                                                                                                                                                                                                                | scaffold_9_mRNA_1919.1          | -                           | -                               |
| GF0033057 | 1                            | 0                        | 0                            | Hypothetical protein (1)                                                  |                                                                                                                                                                                                                          | LOG family [IPR031100] (1)                                                                                                                                                                                                                                                                     | scaffold_9_mRNA_1915.1          | -                           | -                               |
| GF0033056 | 1                            | 0                        | 0                            | Hypothetical protein (1)                                                  | nucleic acid binding [GO:0003676 molecular_function] (1)                                                                                                                                                                 | Ribonuclease H-like domain [IPR012337] (1); Reverse transcriptase zinc-binding domain [IPR026960] (1)                                                                                                                                                                                          | scaffold_9_mRNA_1912.1          | -                           | -                               |
| GF0033055 | 1                            | 0                        | 0                            | Hypothetical protein (1)                                                  |                                                                                                                                                                                                                          |                                                                                                                                                                                                                                                                                                | scaffold_9_mRNA_1900.1          | -                           | -                               |
| GF0033054 | 1                            | 0                        | 0                            | Cytokinin riboside 5'-monophosphate phosphoribohydrolase (1)              |                                                                                                                                                                                                                          | LOG family [IPR031100] (1)                                                                                                                                                                                                                                                                     | scaffold_9_mRNA_1897.1          | -                           | -                               |
| GF0033053 | 1                            | 0                        | 0                            | Hypothetical protein (1)                                                  | nucleic acid binding [GO:0003676 molecular_function] (1); zinc ion binding [GO:0008270 molecular_function] (1)                                                                                                           | Zinc knuckle CX2CX4HX4C [IPR025856] (1); Zinc finger, CCHC-type [IPR001878] (1); Aspartic peptidase domain [IPR021109] (1); Domain of unknown function DUF4283 [IPR025358] (1); Reverse transcriptase domain [IPR004077] (1)                                                                   | scaffold_9_mRNA_1895.1          | -                           | -                               |
| GF0033052 | 1                            | 0                        | 0                            | Hypothetical protein (1)                                                  |                                                                                                                                                                                                                          |                                                                                                                                                                                                                                                                                                | scaffold_9_mRNA_1894.1          | -                           | -                               |
| GF0033051 | 1                            | 0                        | 0                            | Hypothetical protein (1)                                                  |                                                                                                                                                                                                                          |                                                                                                                                                                                                                                                                                                | scaffold_9_mRNA_1888.1          | -                           | -                               |
| GF0033050 | 1                            | 0                        | 0                            | Hypothetical protein (1)                                                  |                                                                                                                                                                                                                          |                                                                                                                                                                                                                                                                                                | scaffold_9_mRNA_1883.1          | -                           | -                               |
| GF0033049 | 1                            | 0                        | 0                            | Hypothetical protein (1)                                                  |                                                                                                                                                                                                                          |                                                                                                                                                                                                                                                                                                | scaffold_9_mRNA_1882.1          | -                           | -                               |
| GF0033048 | 1                            | 0                        | 0                            | Hypothetical protein (1)                                                  | nucleic acid binding [GO:0003676 molecular_function] (1)                                                                                                                                                                 | Ribonuclease H-like domain [IPR012337] (1)                                                                                                                                                                                                                                                     | scaffold_9_mRNA_1874.1          | -                           | -                               |
| GF0033047 | 1                            | 0                        | 0                            | Hypothetical protein (1)                                                  |                                                                                                                                                                                                                          |                                                                                                                                                                                                                                                                                                | scaffold_9_mRNA_1873.1          | -                           | -                               |
| GF0033046 | 1                            | 0                        | 0                            | Hypothetical protein (1)                                                  |                                                                                                                                                                                                                          | NAD(P)-binding domain [IPR016040] (1); NmrA-like domain [IPR008030] (1)                                                                                                                                                                                                                        | scaffold_9_mRNA_1872.1          | -                           | -                               |
| GF0033045 | 1                            | 0                        | 0                            | 60S ribosomal protein L14 (1)                                             | ribosome [GO:0005840 cellular_component] (1); intracellular [GO:0005622 cellular_component] (1); translation [GO:0006412 biological_process] (1); structural constituent of ribosome [GO:0003735 molecular_function] (1) | Translation protein SH3-like domain [IPR008991] (1); Ribosomal protein L14e domain [IPR002784] (1); Ribosomal protein L2 domain 2 [IPR014722] (1)                                                                                                                                              | scaffold_9_mRNA_1871.1          | -                           | -                               |
| GF0033044 | 1                            | 0                        | 0                            | Hypothetical protein (1)                                                  |                                                                                                                                                                                                                          |                                                                                                                                                                                                                                                                                                | scaffold_9_mRNA_1870.1          | -                           | -                               |
| GF0033043 | 1                            | 0                        | 0                            | Hypothetical protein (1)                                                  |                                                                                                                                                                                                                          |                                                                                                                                                                                                                                                                                                | scaffold_9_mRNA_1868.1          | -                           | -                               |
| GF0033042 | 1                            | 0                        | 0                            | Phloem protein 2-82 (1)                                                   | protein binding [GO:0005515 molecular_function] (1)                                                                                                                                                                      | F-box domain [IPR001810] (1); Phloem protein 2-like [IPR025886] (1)                                                                                                                                                                                                                            | scaffold_9_mRNA_1859.1          | -                           | -                               |
| GF0033041 | 1                            | 0                        | 0                            | Cytokinin riboside 5'-monophosphate phosphoribohydrolase (1)              |                                                                                                                                                                                                                          | LOG family [IPR031100] (1)                                                                                                                                                                                                                                                                     | scaffold_9_mRNA_1853.1          | -                           | -                               |
| GF0033040 | 1                            | 0                        | 0                            | Hypothetical protein (1)                                                  | regulation of transcription, DNA-templated [GO:0006355 biological_process] (1); nucleic acid binding [GO:0003676 molecular_function] (1)                                                                                 | Carlavirus nucleic acid-binding protein [IPR025688] (1)                                                                                                                                                                                                                                        | scaffold_9_mRNA_1852.1          | -                           | -                               |
| GF0033039 | 1                            | 0                        | 0                            | Cytokinin riboside 5'-monophosphate phosphoribohydrolase (1)              |                                                                                                                                                                                                                          | Cytokinin riboside 5'-monophosphate phosphoribohydrolase LOG [IPR005269] (1); LOG family [IPR031100] (1)                                                                                                                                                                                       | scaffold_9_mRNA_1841.1          | -                           | -                               |
| GF0033038 | 1                            | 0                        | 0                            | Hypothetical protein (1)                                                  |                                                                                                                                                                                                                          |                                                                                                                                                                                                                                                                                                | scaffold_9_mRNA_1840.1          | -                           | -                               |
| GF0033037 | 1                            | 0                        | 0                            | Hypothetical protein (1)                                                  |                                                                                                                                                                                                                          |                                                                                                                                                                                                                                                                                                | scaffold_9_mRNA_1830.1          | -                           | -                               |
| GF0033036 | 1                            | 0                        | 0                            | Hypothetical protein (1)                                                  |                                                                                                                                                                                                                          |                                                                                                                                                                                                                                                                                                | scaffold_9_mRNA_1827.1          | -                           | -                               |
| GF0033035 | 1                            | 0                        | 0                            | Hypothetical protein (1)                                                  |                                                                                                                                                                                                                          |                                                                                                                                                                                                                                                                                                | scaffold_9_mRNA_1823.1          | -                           | -                               |
| GF0033034 | 1                            | 0                        | 0                            | Hypothetical protein (1)                                                  |                                                                                                                                                                                                                          |                                                                                                                                                                                                                                                                                                | scaffold_9_mRNA_1821.1          | -                           | -                               |
| GF0033033 | 1                            | 0                        | 0                            | BED zinc finger/JAT family dimerization domain isoform 1 (1)              | DNA binding [GO:0003677 molecular_function] (1); nucleic acid binding [GO:0003676 molecular_function] (1); protein dimerization activity [GO:0046983 molecular_function] (1)                                             | HAT, C-terminal dimerisation domain [IPR008986] (1); Zinc finger C2H2-type [IPR013087] (1); HAT-like transposase, RNase-H fold [IPR025525] (1); Ribonuclease H-like domain [IPR012337] (1); Zinc finger, BED-type [IPR003656] (1)                                                              | scaffold_9_mRNA_1812.1          | -                           | -                               |
| GF0033032 | 1                            | 0                        | 0                            | Hypothetical protein (1)                                                  |                                                                                                                                                                                                                          |                                                                                                                                                                                                                                                                                                | scaffold_9_mRNA_1811.1          | -                           | -                               |

| ID        | Num. in <i>C. clementiae</i> | Num. in <i>C. uchiha</i> | Num. in <i>P. trifoliata</i> | Note                                                             | GO                                                                                                                                                                                                                                                                                                                                                                                                                                                                                                                | InterPro                                                                                                                                                                                                                                                                                                                                                                                                                                       | Members in <i>C. clementiae</i> | Members in <i>C. uchiha</i> | Members in <i>P. trifoliata</i> |
|-----------|------------------------------|--------------------------|------------------------------|------------------------------------------------------------------|-------------------------------------------------------------------------------------------------------------------------------------------------------------------------------------------------------------------------------------------------------------------------------------------------------------------------------------------------------------------------------------------------------------------------------------------------------------------------------------------------------------------|------------------------------------------------------------------------------------------------------------------------------------------------------------------------------------------------------------------------------------------------------------------------------------------------------------------------------------------------------------------------------------------------------------------------------------------------|---------------------------------|-----------------------------|---------------------------------|
| GF003301  | 1                            | 0                        | 0                            | 0 Hypothetical protein (1)                                       | nucleic acid binding [GO:0003676 molecular_function] (1); zinc ion binding [GO:0008270 molecular_function] (1)                                                                                                                                                                                                                                                                                                                                                                                                    | Retrotransposon gag domain [IPR005162] (1); Zinc finger, CCHC-type [IPR001878] (1)                                                                                                                                                                                                                                                                                                                                                             | scaffold_9_mRNA_1804.1          | -                           | -                               |
| GF003303  | 1                            | 0                        | 0                            | 0 Hypothetical protein (1)                                       |                                                                                                                                                                                                                                                                                                                                                                                                                                                                                                                   | Retrotransposon gag domain [IPR005162] (1)                                                                                                                                                                                                                                                                                                                                                                                                     | scaffold_9_mRNA_1803.1          | -                           | -                               |
| GF0033029 | 1                            | 0                        | 0                            | 0 Hypothetical protein (1)                                       |                                                                                                                                                                                                                                                                                                                                                                                                                                                                                                                   |                                                                                                                                                                                                                                                                                                                                                                                                                                                | scaffold_9_mRNA_1802.1          | -                           | -                               |
| GF0033028 | 1                            | 0                        | 0                            | 0 Hypothetical protein (1)                                       |                                                                                                                                                                                                                                                                                                                                                                                                                                                                                                                   |                                                                                                                                                                                                                                                                                                                                                                                                                                                | scaffold_9_mRNA_1801.1          | -                           | -                               |
| GF0033027 | 1                            | 0                        | 0                            | 0 Hypothetical protein (1)                                       |                                                                                                                                                                                                                                                                                                                                                                                                                                                                                                                   |                                                                                                                                                                                                                                                                                                                                                                                                                                                | scaffold_9_mRNA_18.1            | -                           | -                               |
| GF0033026 | 1                            | 0                        | 0                            | 0 Hypothetical protein (1)                                       |                                                                                                                                                                                                                                                                                                                                                                                                                                                                                                                   | Retrotransposon gag domain [IPR005162] (1)                                                                                                                                                                                                                                                                                                                                                                                                     | scaffold_9_mRNA_1799.1          | -                           | -                               |
| GF0033025 | 1                            | 0                        | 0                            | 0 Hypothetical protein (1)                                       |                                                                                                                                                                                                                                                                                                                                                                                                                                                                                                                   | (1); Arabidopsis retrotransposon Orf1 [IPR004312] (1)                                                                                                                                                                                                                                                                                                                                                                                          | scaffold_9_mRNA_1798.1          | -                           | -                               |
| GF0033024 | 1                            | 0                        | 0                            | 0 Hypothetical protein (1)                                       |                                                                                                                                                                                                                                                                                                                                                                                                                                                                                                                   | Aspartic peptidase domain [IPR021109] (1); Arabidopsis retrotransposon Orf1 [IPR004312] (1)                                                                                                                                                                                                                                                                                                                                                    | scaffold_9_mRNA_1797.1          | -                           | -                               |
| GF0033023 | 1                            | 0                        | 0                            | 0 Zinc finger family protein (1)                                 | nucleic acid binding [GO:0003676 molecular_function] (1)                                                                                                                                                                                                                                                                                                                                                                                                                                                          | Zinc finger C2H2-type [IPR013087] (1)                                                                                                                                                                                                                                                                                                                                                                                                          | scaffold_9_mRNA_1794.1          | -                           | -                               |
| GF0033022 | 1                            | 0                        | 0                            | 0 Cytokinin riboside 5'-monophosphate phosphoribohydrolase (1)   |                                                                                                                                                                                                                                                                                                                                                                                                                                                                                                                   | LOG family [IPR031100] (1)                                                                                                                                                                                                                                                                                                                                                                                                                     | scaffold_9_mRNA_1776.1          | -                           | -                               |
| GF0033021 | 1                            | 0                        | 0                            | 0 Hypothetical protein (1)                                       |                                                                                                                                                                                                                                                                                                                                                                                                                                                                                                                   |                                                                                                                                                                                                                                                                                                                                                                                                                                                | scaffold_9_mRNA_1772.1          | -                           | -                               |
| GF0033020 | 1                            | 0                        | 0                            | 0 Hypothetical protein (1)                                       |                                                                                                                                                                                                                                                                                                                                                                                                                                                                                                                   |                                                                                                                                                                                                                                                                                                                                                                                                                                                | scaffold_9_mRNA_1769.1          | -                           | -                               |
| GF0033019 | 1                            | 0                        | 0                            | 0 Hypothetical protein (1)                                       |                                                                                                                                                                                                                                                                                                                                                                                                                                                                                                                   |                                                                                                                                                                                                                                                                                                                                                                                                                                                | scaffold_9_mRNA_1756.1          | -                           | -                               |
| GF0033018 | 1                            | 0                        | 0                            | 0 Cytokinin riboside 5'-monophosphate phosphoribohydrolase (1)   |                                                                                                                                                                                                                                                                                                                                                                                                                                                                                                                   | LOG family [IPR031100] (1)                                                                                                                                                                                                                                                                                                                                                                                                                     | scaffold_9_mRNA_1755.1          | -                           | -                               |
| GF0033017 | 1                            | 0                        | 0                            | 0 Hypothetical protein (1)                                       |                                                                                                                                                                                                                                                                                                                                                                                                                                                                                                                   |                                                                                                                                                                                                                                                                                                                                                                                                                                                | scaffold_9_mRNA_1754.1          | -                           | -                               |
| GF0033016 | 1                            | 0                        | 0                            | 0 Cytokinin riboside 5'-monophosphate phosphoribohydrolase (1)   |                                                                                                                                                                                                                                                                                                                                                                                                                                                                                                                   | LOG family [IPR031100] (1)                                                                                                                                                                                                                                                                                                                                                                                                                     | scaffold_9_mRNA_1748.1          | -                           | -                               |
| GF0033015 | 1                            | 0                        | 0                            | 0 Hypothetical protein (1)                                       |                                                                                                                                                                                                                                                                                                                                                                                                                                                                                                                   |                                                                                                                                                                                                                                                                                                                                                                                                                                                | scaffold_9_mRNA_1747.1          | -                           | -                               |
| GF0033014 | 1                            | 0                        | 0                            | 0 Hypothetical protein (1)                                       |                                                                                                                                                                                                                                                                                                                                                                                                                                                                                                                   |                                                                                                                                                                                                                                                                                                                                                                                                                                                | scaffold_9_mRNA_1746.1          | -                           | -                               |
| GF0033013 | 1                            | 0                        | 0                            | 0 Hypothetical protein (1)                                       |                                                                                                                                                                                                                                                                                                                                                                                                                                                                                                                   |                                                                                                                                                                                                                                                                                                                                                                                                                                                | scaffold_9_mRNA_1731.1          | -                           | -                               |
| GF0033012 | 1                            | 0                        | 0                            | 0 Hypothetical protein (1)                                       | glycine-tRNA ligase activity [GO:0004820 molecular_function] (1); nucleotide binding [GO:0000166 molecular_function] (1); ATP binding [GO:0005524 molecular_function] (1); cytoplasm [GO:0005737 cellular_component] (1); glycyl-tRNA aminoacylation [GO:0006426 biological_process] (1)                                                                                                                                                                                                                          | Glycyl-tRNA synthetase:DNA polymerase subunit gamma-2 [IPR027031] (1); Glycyl-tRNA synthetase [IPR002315] (1); Anticodon-binding [IPR004154] (1)                                                                                                                                                                                                                                                                                               | scaffold_9_mRNA_1730.1          | -                           | -                               |
| GF0033011 | 1                            | 0                        | 0                            | 0 Hypothetical protein (1)                                       |                                                                                                                                                                                                                                                                                                                                                                                                                                                                                                                   |                                                                                                                                                                                                                                                                                                                                                                                                                                                | scaffold_9_mRNA_1729.1          | -                           | -                               |
| GF0033010 | 1                            | 0                        | 0                            | 0 Cytokinin riboside 5'-monophosphate phosphoribohydrolase (1)   |                                                                                                                                                                                                                                                                                                                                                                                                                                                                                                                   | Cytokinin riboside 5'-monophosphate phosphoribohydrolase:LOG [IPR005269] (1); LOG family [IPR031100] (1)                                                                                                                                                                                                                                                                                                                                       | scaffold_9_mRNA_1728.1          | -                           | -                               |
| GF0033009 | 1                            | 0                        | 0                            | 0 Hypothetical protein (1)                                       |                                                                                                                                                                                                                                                                                                                                                                                                                                                                                                                   |                                                                                                                                                                                                                                                                                                                                                                                                                                                | scaffold_9_mRNA_1718.1          | -                           | -                               |
| GF0033008 | 1                            | 0                        | 0                            | 0 Hypothetical protein (1)                                       |                                                                                                                                                                                                                                                                                                                                                                                                                                                                                                                   |                                                                                                                                                                                                                                                                                                                                                                                                                                                | scaffold_9_mRNA_1711.1          | -                           | -                               |
| GF0033007 | 1                            | 0                        | 0                            | 0 Hypothetical protein (1)                                       |                                                                                                                                                                                                                                                                                                                                                                                                                                                                                                                   | Retrotransposon gag domain [IPR005162] (1)                                                                                                                                                                                                                                                                                                                                                                                                     | scaffold_9_mRNA_1710.1          | -                           | -                               |
| GF0033006 | 1                            | 0                        | 0                            | 0 Hypothetical protein (1)                                       |                                                                                                                                                                                                                                                                                                                                                                                                                                                                                                                   |                                                                                                                                                                                                                                                                                                                                                                                                                                                | scaffold_9_mRNA_1697.1          | -                           | -                               |
| GF0033005 | 1                            | 0                        | 0                            | 0 SOUL heme-binding family protein (1)                           |                                                                                                                                                                                                                                                                                                                                                                                                                                                                                                                   | SOUL haem-binding protein [IPR006917] (1)                                                                                                                                                                                                                                                                                                                                                                                                      | scaffold_9_mRNA_1695.1          | -                           | -                               |
| GF0033004 | 1                            | 0                        | 0                            | 0 Hypothetical protein (1)                                       | regulation of transcription, DNA-templated [GO:0006355 biological_process] (1)                                                                                                                                                                                                                                                                                                                                                                                                                                    | FHY3/FAR1 family [IPR031052] (1); MULE transposase domain [IPR018289] (1)                                                                                                                                                                                                                                                                                                                                                                      | scaffold_9_mRNA_1690.1          | -                           | -                               |
| GF0033003 | 1                            | 0                        | 0                            | 0 Hypothetical protein (1)                                       |                                                                                                                                                                                                                                                                                                                                                                                                                                                                                                                   |                                                                                                                                                                                                                                                                                                                                                                                                                                                | scaffold_9_mRNA_1689.1          | -                           | -                               |
| GF0033002 | 1                            | 0                        | 0                            | 0 Hypothetical protein (1)                                       |                                                                                                                                                                                                                                                                                                                                                                                                                                                                                                                   |                                                                                                                                                                                                                                                                                                                                                                                                                                                | scaffold_9_mRNA_1682.1          | -                           | -                               |
| GF0033001 | 1                            | 0                        | 0                            | 0 Hypothetical protein (1)                                       |                                                                                                                                                                                                                                                                                                                                                                                                                                                                                                                   |                                                                                                                                                                                                                                                                                                                                                                                                                                                | scaffold_9_mRNA_1677.1          | -                           | -                               |
| GF0033000 | 1                            | 0                        | 0                            | 0 Uridine 5'-monophosphate synthase (1)                          | 'de novo' UMP biosynthetic process [GO:0044205 biological_process] (1); orotate phosphoribosyltransferase activity [GO:0004588 molecular_function] (1); orotate-5-phosphate decarboxylase activity [GO:0004590 molecular_function] (1); metabolic process [GO:0008152 biological_process] (1); nucleoside metabolic process [GO:0009116 biological_process] (1); catalytic activity [GO:0003824 molecular_function] (1); 'de novo' pyrimidine nucleobase biosynthetic process [GO:0006207 biological_process] (1) | Phosphoribosyltransferase domain [IPR000836] (1); Aldolase-type TIM barrel [IPR013785] (1); Orotidine 5'-phosphate decarboxylase, active site [IPR018089] (1); Orotidine 5'-phosphate decarboxylase domain [IPR001754] (1); Phosphoribosyltransferase-like [IPR029057] (1); Orotidine 5'-phosphate decarboxylase [IPR014732] (1); Orotate phosphoribosyl transferase domain [IPR004667] (1); Ribulose-phosphate binding barrel [IPR011060] (1) | scaffold_9_mRNA_1670.1          | -                           | -                               |
| GF0032999 | 1                            | 0                        | 0                            | 0 Hypothetical protein (1)                                       | nucleic acid binding [GO:0003676 molecular_function] (1); regulation of transcription, DNA-templated [GO:0006355 biological_process] (1)                                                                                                                                                                                                                                                                                                                                                                          | Carfavirus nucleic acid-binding protein [IPR025268] (1)                                                                                                                                                                                                                                                                                                                                                                                        | scaffold_9_mRNA_1668.1          | -                           | -                               |
| GF0032998 | 1                            | 0                        | 0                            | 0 Cytokinin riboside 5'-monophosphate phosphoribohydrolase (1)   |                                                                                                                                                                                                                                                                                                                                                                                                                                                                                                                   | LOG family [IPR031100] (1); Cytokinin riboside 5'-monophosphate phosphoribohydrolase:LOG [IPR005269] (1)                                                                                                                                                                                                                                                                                                                                       | scaffold_9_mRNA_1667.1          | -                           | -                               |
| GF0032997 | 1                            | 0                        | 0                            | 0 Hypothetical protein (1)                                       |                                                                                                                                                                                                                                                                                                                                                                                                                                                                                                                   | Myb domain, plants [IPR006447] (1)                                                                                                                                                                                                                                                                                                                                                                                                             | scaffold_9_mRNA_1666.1          | -                           | -                               |
| GF0032996 | 1                            | 0                        | 0                            | 0 Putative non-LTR retroelement reverse transcriptase (1)        | nucleic acid binding [GO:0003676 molecular_function] (1)                                                                                                                                                                                                                                                                                                                                                                                                                                                          | Endonuclease/exonuclease/phosphatase [IPR005135] (1); Ribonuclease H-like domain [IPR012337] (1); Reverse transcriptase domain [IPR000477] (1)                                                                                                                                                                                                                                                                                                 | scaffold_9_mRNA_1665.1          | -                           | -                               |
| GF0032995 | 1                            | 0                        | 0                            | 0 RNA-directed DNA polymerase (Reverse transcriptase) (1)        |                                                                                                                                                                                                                                                                                                                                                                                                                                                                                                                   | Reverse transcriptase domain [IPR000477] (1); Reverse transcriptase zinc-binding domain [IPR026960] (1)                                                                                                                                                                                                                                                                                                                                        | scaffold_9_mRNA_1663.1          | -                           | -                               |
| GF0032994 | 1                            | 0                        | 0                            | 0 Hypothetical protein (1)                                       |                                                                                                                                                                                                                                                                                                                                                                                                                                                                                                                   |                                                                                                                                                                                                                                                                                                                                                                                                                                                | scaffold_9_mRNA_1660.1          | -                           | -                               |
| GF0032993 | 1                            | 0                        | 0                            | 0 Hypothetical protein (1)                                       |                                                                                                                                                                                                                                                                                                                                                                                                                                                                                                                   |                                                                                                                                                                                                                                                                                                                                                                                                                                                | scaffold_9_mRNA_1658.1          | -                           | -                               |
| GF0032992 | 1                            | 0                        | 0                            | 0 Hypothetical protein (1)                                       |                                                                                                                                                                                                                                                                                                                                                                                                                                                                                                                   |                                                                                                                                                                                                                                                                                                                                                                                                                                                | scaffold_9_mRNA_1657.1          | -                           | -                               |
| GF0032991 | 1                            | 0                        | 0                            | 0 Hypothetical protein (1)                                       |                                                                                                                                                                                                                                                                                                                                                                                                                                                                                                                   |                                                                                                                                                                                                                                                                                                                                                                                                                                                | scaffold_9_mRNA_1652.1          | -                           | -                               |
| GF0032990 | 1                            | 0                        | 0                            | 0 Hypothetical protein (1)                                       |                                                                                                                                                                                                                                                                                                                                                                                                                                                                                                                   |                                                                                                                                                                                                                                                                                                                                                                                                                                                | scaffold_9_mRNA_1650.1          | -                           | -                               |
| GF0032989 | 1                            | 0                        | 0                            | 0 Hypothetical protein (1)                                       |                                                                                                                                                                                                                                                                                                                                                                                                                                                                                                                   | Reverse transcriptase, RNA-dependent DNA polymerase [IPR013103] (1)                                                                                                                                                                                                                                                                                                                                                                            | scaffold_9_mRNA_1647.1          | -                           | -                               |
| GF0032988 | 1                            | 0                        | 0                            | 0 Zinc knuckle family protein (1)                                | zinc ion binding [GO:0008270 molecular_function] (1); nucleic acid binding [GO:0003676 molecular_function] (1)                                                                                                                                                                                                                                                                                                                                                                                                    | Zinc finger, CCHC-type [IPR001878] (1)                                                                                                                                                                                                                                                                                                                                                                                                         | scaffold_9_mRNA_1645.1          | -                           | -                               |
| GF0032987 | 1                            | 0                        | 0                            | 0 Hypothetical protein (1)                                       |                                                                                                                                                                                                                                                                                                                                                                                                                                                                                                                   |                                                                                                                                                                                                                                                                                                                                                                                                                                                | scaffold_9_mRNA_1641.1          | -                           | -                               |
| GF0032986 | 1                            | 0                        | 0                            | 0 Hypothetical protein (1)                                       |                                                                                                                                                                                                                                                                                                                                                                                                                                                                                                                   |                                                                                                                                                                                                                                                                                                                                                                                                                                                | scaffold_9_mRNA_1637.1          | -                           | -                               |
| GF0032985 | 1                            | 0                        | 0                            | 0 Hypothetical protein (1)                                       |                                                                                                                                                                                                                                                                                                                                                                                                                                                                                                                   |                                                                                                                                                                                                                                                                                                                                                                                                                                                | scaffold_9_mRNA_1635.1          | -                           | -                               |
| GF0032984 | 1                            | 0                        | 0                            | 0 Hypothetical protein (1)                                       |                                                                                                                                                                                                                                                                                                                                                                                                                                                                                                                   |                                                                                                                                                                                                                                                                                                                                                                                                                                                | scaffold_9_mRNA_1634.1          | -                           | -                               |
| GF0032983 | 1                            | 0                        | 0                            | 0 Hypothetical protein (1)                                       |                                                                                                                                                                                                                                                                                                                                                                                                                                                                                                                   |                                                                                                                                                                                                                                                                                                                                                                                                                                                | scaffold_9_mRNA_1628.1          | -                           | -                               |
| GF0032982 | 1                            | 0                        | 0                            | 0 Hypothetical protein (1)                                       |                                                                                                                                                                                                                                                                                                                                                                                                                                                                                                                   |                                                                                                                                                                                                                                                                                                                                                                                                                                                | scaffold_9_mRNA_1625.1          | -                           | -                               |
| GF0032981 | 1                            | 0                        | 0                            | 0 Hypothetical protein (1)                                       |                                                                                                                                                                                                                                                                                                                                                                                                                                                                                                                   |                                                                                                                                                                                                                                                                                                                                                                                                                                                | scaffold_9_mRNA_1624.1          | -                           | -                               |
| GF0032980 | 1                            | 0                        | 0                            | 0 Cytokinin riboside 5'-monophosphate phosphoribohydrolase (1)   |                                                                                                                                                                                                                                                                                                                                                                                                                                                                                                                   |                                                                                                                                                                                                                                                                                                                                                                                                                                                | scaffold_9_mRNA_1621.1          | -                           | -                               |
| GF0032979 | 1                            | 0                        | 0                            | 0 Hypothetical protein (1)                                       |                                                                                                                                                                                                                                                                                                                                                                                                                                                                                                                   | Cation efflux protein, cytoplasmic domain [IPR027470] (1)                                                                                                                                                                                                                                                                                                                                                                                      | scaffold_9_mRNA_1619.1          | -                           | -                               |
| GF0032978 | 1                            | 0                        | 0                            | 0 Hypothetical protein (1)                                       |                                                                                                                                                                                                                                                                                                                                                                                                                                                                                                                   |                                                                                                                                                                                                                                                                                                                                                                                                                                                | scaffold_9_mRNA_1603.1          | -                           | -                               |
| GF0032977 | 1                            | 0                        | 0                            | 0 Hypothetical protein (1)                                       |                                                                                                                                                                                                                                                                                                                                                                                                                                                                                                                   |                                                                                                                                                                                                                                                                                                                                                                                                                                                | scaffold_9_mRNA_1602.1          | -                           | -                               |
| GF0032976 | 1                            | 0                        | 0                            | 0 Hypothetical protein (1)                                       | nucleic acid binding [GO:0003676 molecular_function] (1); DNA integration [GO:0015074 biological_process] (1)                                                                                                                                                                                                                                                                                                                                                                                                     | Ribonuclease H-like domain [IPR012337] (1); Integrase, catalytic core [IPR015844] (1)                                                                                                                                                                                                                                                                                                                                                          | scaffold_9_mRNA_1595.1          | -                           | -                               |
| GF0032975 | 1                            | 0                        | 0                            | 0 Non-ltr retrotransposon reverse transcriptase-like protein (1) |                                                                                                                                                                                                                                                                                                                                                                                                                                                                                                                   | Endonuclease/exonuclease/phosphatase [IPR005135] (1); Reverse transcriptase domain [IPR000477] (1)                                                                                                                                                                                                                                                                                                                                             | scaffold_9_mRNA_1585.1          | -                           | -                               |
| GF0032974 | 1                            | 0                        | 0                            | 0 Hypothetical protein (1)                                       | protein binding [GO:0005515 molecular_function] (1)                                                                                                                                                                                                                                                                                                                                                                                                                                                               | UBX domain [IPR001012] (1)                                                                                                                                                                                                                                                                                                                                                                                                                     | scaffold_9_mRNA_1581.1          | -                           | -                               |
| GF0032973 | 1                            | 0                        | 0                            | 0 E3 ubiquitin-protein ligase RBBP6 (1)                          | nucleic acid binding [GO:0003676 molecular_function] (1); zinc ion binding [GO:0008270 molecular_function] (1)                                                                                                                                                                                                                                                                                                                                                                                                    | Zinc finger, CCHC-type [IPR001878] (1)                                                                                                                                                                                                                                                                                                                                                                                                         | scaffold_9_mRNA_1568.1          | -                           | -                               |
| GF0032972 | 1                            | 0                        | 0                            | 0 Hypothetical protein (1)                                       | heme binding [GO:0020037 molecular_function] (1); response to oxidative stress [GO:0006979 biological_process] (1); peroxidase activity [GO:0004601 molecular_function] (1); oxidation-reduction process [GO:0055114 biological_process] (1)                                                                                                                                                                                                                                                                      | Haem peroxidase, plant/fungal/bacterial [IPR02016] (1); Plant peroxidase [IPR000823] (1); Haem peroxidase [IPR010255] (1)                                                                                                                                                                                                                                                                                                                      | scaffold_9_mRNA_1558.1          | -                           | -                               |
| GF0032971 | 1                            | 0                        | 0                            | 0 Hypothetical protein (1)                                       |                                                                                                                                                                                                                                                                                                                                                                                                                                                                                                                   |                                                                                                                                                                                                                                                                                                                                                                                                                                                | scaffold_9_mRNA_1554.1          | -                           | -                               |
| GF0032970 | 1                            | 0                        | 0                            | 0 Hypothetical protein (1)                                       | nucleic acid binding [GO:0003676 molecular_function] (1)                                                                                                                                                                                                                                                                                                                                                                                                                                                          | Ribonuclease H-like domain [IPR012337] (1)                                                                                                                                                                                                                                                                                                                                                                                                     | scaffold_9_mRNA_1552.1          | -                           | -                               |
| GF0032969 | 1                            | 0                        | 0                            | 0 Hypothetical protein (1)                                       |                                                                                                                                                                                                                                                                                                                                                                                                                                                                                                                   | Arabidopsis retrotransposon Orf1 [IPR004312] (1)                                                                                                                                                                                                                                                                                                                                                                                               | scaffold_9_mRNA_1543.1          | -                           | -                               |
| GF0032968 | 1                            | 0                        | 0                            | 0 Hypothetical protein (1)                                       | peroxidase activity [GO:0004601 molecular_function] (1); oxidation-reduction process [GO:0055114 biological_process] (1); heme binding [GO:0020037 molecular_function] (1); response to oxidative stress [GO:0006979 biological_process] (1)                                                                                                                                                                                                                                                                      | Haem peroxidase [IPR010255] (1); Plant peroxidase [IPR000823] (1); Peroxidases haem-ligand binding site [IPR019799] (1); Haem peroxidase, plant/fungal/bacterial [IPR002016] (1)                                                                                                                                                                                                                                                               | scaffold_9_mRNA_1542.1          | -                           | -                               |
| GF0032967 | 1                            | 0                        | 0                            | 0 Hypothetical protein (1)                                       |                                                                                                                                                                                                                                                                                                                                                                                                                                                                                                                   |                                                                                                                                                                                                                                                                                                                                                                                                                                                | scaffold_9_mRNA_1534.1          | -                           | -                               |
| GF0032966 | 1                            | 0                        | 0                            | 0 Hypothetical protein (1)                                       |                                                                                                                                                                                                                                                                                                                                                                                                                                                                                                                   |                                                                                                                                                                                                                                                                                                                                                                                                                                                | scaffold_9_mRNA_1533.1          | -                           | -                               |

| ID        | Num. in <i>C. clementiae</i> | Num. in <i>C. uchiha</i> | Num. in <i>P. trifoliate</i> | Note                                                              | GO                                                                                                                                                                                                                                                                                                                     | InterPro                                                                                                                                                                                                                                                  | Members in <i>C. clementiae</i> | Members in <i>C. uchiha</i> | Members in <i>P. trifoliate</i> |
|-----------|------------------------------|--------------------------|------------------------------|-------------------------------------------------------------------|------------------------------------------------------------------------------------------------------------------------------------------------------------------------------------------------------------------------------------------------------------------------------------------------------------------------|-----------------------------------------------------------------------------------------------------------------------------------------------------------------------------------------------------------------------------------------------------------|---------------------------------|-----------------------------|---------------------------------|
| GF0032965 | 1                            | 0                        | 0                            | Cytokinin riboside 5'-monophosphate phosphoribosyltransferase (1) |                                                                                                                                                                                                                                                                                                                        | LOG family [IPR031100] (1)                                                                                                                                                                                                                                | scaffold_9_mRNA_1532.1          | -                           | -                               |
| GF0032964 | 1                            | 0                        | 0                            | P-loop nucleoside triphosphate hydrolase superfamily protein (1)  |                                                                                                                                                                                                                                                                                                                        | P-loop containing nucleoside triphosphate hydrolase [IPR027417] (1)                                                                                                                                                                                       | scaffold_9_mRNA_1527.1          | -                           | -                               |
| GF0032963 | 1                            | 0                        | 0                            | Phospholipase A2 family protein (1)                               | lipid catabolic process [GO:0016042 biological_process] (1); calcium ion binding [GO:005509 molecular_function] (1); phospholipid metabolic process [GO:0006644 biological_process] (1); arachidonic acid secretion [GO:0050462 biological_process] (1); phospholipase A2 activity [GO:0004623 molecular_function] (1) | Phospholipase A2 domain [IPR016090] (1); Phospholipase A2, histidine active site [IPR033133] (1); Phospholipase A2 [IPR012111] (1)                                                                                                                        | scaffold_9_mRNA_1526.1          | -                           | -                               |
| GF0032962 | 1                            | 0                        | 0                            | Monosaccharide transport protein (1)                              |                                                                                                                                                                                                                                                                                                                        |                                                                                                                                                                                                                                                           | scaffold_9_mRNA_1525.1          | -                           | -                               |
| GF0032961 | 1                            | 0                        | 0                            | Hypothetical protein (1)                                          | cysteine-type peptidase activity [GO:0008234 molecular_function] (1); proteolysis [GO:0006508 biological_process] (1)                                                                                                                                                                                                  | Ulp1 protease family, C-terminal catalytic domain [IPR003653] (1); Domain of unknown function DUF1985 [IPR015410] (1)                                                                                                                                     | scaffold_9_mRNA_1521.1          | -                           | -                               |
| GF0032960 | 1                            | 0                        | 0                            | (Rice Genome Annotation Project) transposon protein (1)           |                                                                                                                                                                                                                                                                                                                        |                                                                                                                                                                                                                                                           | scaffold_9_mRNA_1520.1          | -                           | -                               |
| GF0032959 | 1                            | 0                        | 0                            | Hypothetical protein (1)                                          |                                                                                                                                                                                                                                                                                                                        |                                                                                                                                                                                                                                                           | scaffold_9_mRNA_1518.1          | -                           | -                               |
| GF0032958 | 1                            | 0                        | 0                            | Hypothetical protein (1)                                          |                                                                                                                                                                                                                                                                                                                        |                                                                                                                                                                                                                                                           | scaffold_9_mRNA_1514.1          | -                           | -                               |
| GF0032957 | 1                            | 0                        | 0                            | Hypothetical protein (1)                                          | proteolysis [GO:0006508 biological_process] (1); cysteine-type peptidase activity [GO:0008234 molecular_function] (1)                                                                                                                                                                                                  | Domain of unknown function DUF1985 [IPR015410] (1); Ulp1 protease family, C-terminal catalytic domain [IPR003653] (1)                                                                                                                                     | scaffold_9_mRNA_1512.1          | -                           | -                               |
| GF0032956 | 1                            | 0                        | 0                            | Hypothetical protein (1)                                          |                                                                                                                                                                                                                                                                                                                        |                                                                                                                                                                                                                                                           | scaffold_9_mRNA_1504.1          | -                           | -                               |
| GF0032955 | 1                            | 0                        | 0                            | Hypothetical protein (1)                                          |                                                                                                                                                                                                                                                                                                                        |                                                                                                                                                                                                                                                           | scaffold_9_mRNA_1497.1          | -                           | -                               |
| GF0032954 | 1                            | 0                        | 0                            | Hypothetical protein (1)                                          |                                                                                                                                                                                                                                                                                                                        |                                                                                                                                                                                                                                                           | scaffold_9_mRNA_1493.1          | -                           | -                               |
| GF0032953 | 1                            | 0                        | 0                            | Hypothetical protein (1)                                          | structural constituent of ribosome [GO:0007335 molecular_function] (1); translation [GO:0006412 biological_process] (1); ribosome [GO:0005840 cellular_component] (1)                                                                                                                                                  | Ribosomal protein L14P [IPR000218] (1)                                                                                                                                                                                                                    | scaffold_9_mRNA_1492.1          | -                           | -                               |
| GF0032952 | 1                            | 0                        | 0                            | Hypothetical protein (1)                                          |                                                                                                                                                                                                                                                                                                                        |                                                                                                                                                                                                                                                           | scaffold_9_mRNA_1488.1          | -                           | -                               |
| GF0032951 | 1                            | 0                        | 0                            | Hypothetical protein (1)                                          |                                                                                                                                                                                                                                                                                                                        | Reverse transcriptase domain [IPR000477] (1)                                                                                                                                                                                                              | scaffold_9_mRNA_1487.1          | -                           | -                               |
| GF0032950 | 1                            | 0                        | 0                            | Hypothetical protein (1)                                          |                                                                                                                                                                                                                                                                                                                        |                                                                                                                                                                                                                                                           | scaffold_9_mRNA_1481.1          | -                           | -                               |
| GF0032949 | 1                            | 0                        | 0                            | Amino Acid-Polyamine-Organocation (APC) Family (1)                | base-excision repair [GO:0006284 biological_process] (1); DNA repair [GO:0006281 biological_process] (1); hydrolase activity, hydrolyzing N-glycosyl compounds [GO:0016799 molecular_function] (1); uracil DNA N-glycosylase activity [GO:0004844 molecular_function] (1)                                              | Uracil-DNA glycosylase, active site [IPR018085] (1); Uracil-DNA glycosylase-like [IPR081222] (1); Uracil-DNA glycosylase family 1 [IPR002043] (1)                                                                                                         | scaffold_9_mRNA_1480.1          | -                           | -                               |
| GF0032948 | 1                            | 0                        | 0                            | Hypothetical protein (1)                                          |                                                                                                                                                                                                                                                                                                                        |                                                                                                                                                                                                                                                           | scaffold_9_mRNA_1475.1          | -                           | -                               |
| GF0032947 | 1                            | 0                        | 0                            | Hypothetical protein (1)                                          |                                                                                                                                                                                                                                                                                                                        |                                                                                                                                                                                                                                                           | scaffold_9_mRNA_1472.1          | -                           | -                               |
| GF0032946 | 1                            | 0                        | 0                            | Limonene synthase (1)                                             | magnesium ion binding [GO:0000287 molecular_function] (1); terpene synthase activity [GO:0010333 molecular_function] (1); lyase activity [GO:0016829 molecular_function] (1); metabolic process [GO:0008152 biological_process] (1)                                                                                    | Terpene synthase, N-terminal domain [IPR010966] (1); Terpene synthase, metal-binding domain [IPR005630] (1); Terpenoid cyclase/protein prenyltransferase alpha-alpha toroid [IPR089380] (1); Isoprenoid synthase domain [IPR008949] (1)                   | scaffold_9_mRNA_1470.1          | -                           | -                               |
| GF0032945 | 1                            | 0                        | 0                            | Hypothetical protein (1)                                          |                                                                                                                                                                                                                                                                                                                        |                                                                                                                                                                                                                                                           | scaffold_9_mRNA_1468.1          | -                           | -                               |
| GF0032944 | 1                            | 0                        | 0                            | Hypothetical protein (1)                                          |                                                                                                                                                                                                                                                                                                                        |                                                                                                                                                                                                                                                           | scaffold_9_mRNA_1467.1          | -                           | -                               |
| GF0032943 | 1                            | 0                        | 0                            | Hypothetical protein (1)                                          |                                                                                                                                                                                                                                                                                                                        | Reverse transcriptase domain [IPR000477] (1)                                                                                                                                                                                                              | scaffold_9_mRNA_1466.1          | -                           | -                               |
| GF0032942 | 1                            | 0                        | 0                            | Hypothetical protein (1)                                          | nucleic acid binding [GO:0003676 molecular_function] (1)                                                                                                                                                                                                                                                               | Reverse transcriptase zinc-binding domain [IPR026960] (1); Ribonuclease H-like domain [IPR012337] (1)                                                                                                                                                     | scaffold_9_mRNA_1465.1          | -                           | -                               |
| GF0032941 | 1                            | 0                        | 0                            | Hypothetical protein (1)                                          |                                                                                                                                                                                                                                                                                                                        |                                                                                                                                                                                                                                                           | scaffold_9_mRNA_1460.1          | -                           | -                               |
| GF0032940 | 1                            | 0                        | 0                            | Hypothetical protein (1)                                          |                                                                                                                                                                                                                                                                                                                        |                                                                                                                                                                                                                                                           | scaffold_9_mRNA_1457.1          | -                           | -                               |
| GF0032939 | 1                            | 0                        | 0                            | Hypothetical protein (1)                                          |                                                                                                                                                                                                                                                                                                                        |                                                                                                                                                                                                                                                           | scaffold_9_mRNA_1456.1          | -                           | -                               |
| GF0032938 | 1                            | 0                        | 0                            | RNA-directed DNA polymerase (Reverse transcriptase) (1)           |                                                                                                                                                                                                                                                                                                                        | Reverse transcriptase domain [IPR000477] (1)                                                                                                                                                                                                              | scaffold_9_mRNA_1454.1          | -                           | -                               |
| GF0032937 | 1                            | 0                        | 0                            | Hypothetical protein (1)                                          |                                                                                                                                                                                                                                                                                                                        | Retrotransposon gag domain [IPR005162] (1); Chromo domain [IPR023780] (1)                                                                                                                                                                                 | scaffold_9_mRNA_1453.1          | -                           | -                               |
| GF0032936 | 1                            | 0                        | 0                            | Hypothetical protein (1)                                          |                                                                                                                                                                                                                                                                                                                        |                                                                                                                                                                                                                                                           | scaffold_9_mRNA_1452.1          | -                           | -                               |
| GF0032935 | 1                            | 0                        | 0                            | Hypothetical protein (1)                                          |                                                                                                                                                                                                                                                                                                                        |                                                                                                                                                                                                                                                           | scaffold_9_mRNA_1449.1          | -                           | -                               |
| GF0032934 | 1                            | 0                        | 0                            | Hypothetical protein (1)                                          | nucleic acid binding [GO:0003676 molecular_function] (1)                                                                                                                                                                                                                                                               | Ribonuclease H-like domain [IPR012337] (1)                                                                                                                                                                                                                | scaffold_9_mRNA_1447.1          | -                           | -                               |
| GF0032933 | 1                            | 0                        | 0                            | Hypothetical protein (1)                                          |                                                                                                                                                                                                                                                                                                                        |                                                                                                                                                                                                                                                           | scaffold_9_mRNA_1440.1          | -                           | -                               |
| GF0032932 | 1                            | 0                        | 0                            | Hypothetical protein (1)                                          |                                                                                                                                                                                                                                                                                                                        |                                                                                                                                                                                                                                                           | scaffold_9_mRNA_1436.1          | -                           | -                               |
| GF0032931 | 1                            | 0                        | 0                            | Hypothetical protein (1)                                          |                                                                                                                                                                                                                                                                                                                        |                                                                                                                                                                                                                                                           | scaffold_9_mRNA_1433.1          | -                           | -                               |
| GF0032930 | 1                            | 0                        | 0                            | Hypothetical protein (1)                                          |                                                                                                                                                                                                                                                                                                                        |                                                                                                                                                                                                                                                           | scaffold_9_mRNA_1432.1          | -                           | -                               |
| GF0032929 | 1                            | 0                        | 0                            | Nucleolar GTP-binding protein 1 (1)                               | nucleolus [GO:0005730 cellular_component] (1); GTP binding [GO:0005525 molecular_function] (1)                                                                                                                                                                                                                         | NOG, C-terminal [IPR012973] (1); OBG-type guanine nucleotide-binding (G) domain [IPR031167] (1); Nucleolar GTP-binding protein 1 [IPR024926] (1); GTP binding domain [IPR006073] (1); P-loop containing nucleoside triphosphate hydrolase [IPR027417] (1) | scaffold_9_mRNA_1426.1          | -                           | -                               |
| GF0032928 | 1                            | 0                        | 0                            | Phloem protein 2-B13 (1)                                          | protein binding [GO:0005515 molecular_function] (1)                                                                                                                                                                                                                                                                    | Phloem protein 2-like [IPR025886] (1); F-box domain [IPR001810] (1)                                                                                                                                                                                       | scaffold_9_mRNA_1418.1          | -                           | -                               |
| GF0032927 | 1                            | 0                        | 0                            | Hypothetical protein (1)                                          |                                                                                                                                                                                                                                                                                                                        |                                                                                                                                                                                                                                                           | scaffold_9_mRNA_1415.1          | -                           | -                               |
| GF0032926 | 1                            | 0                        | 0                            | Hypothetical protein (1)                                          |                                                                                                                                                                                                                                                                                                                        | Gag-polyprotein of LTR copia-type [IPR029472] (1)                                                                                                                                                                                                         | scaffold_9_mRNA_1414.1          | -                           | -                               |
| GF0032925 | 1                            | 0                        | 0                            | Hypothetical protein (1)                                          | zinc ion binding [GO:0008270 molecular_function] (1); nucleic acid binding [GO:0003676 molecular_function] (1)                                                                                                                                                                                                         | Zinc finger, CCHC-type [IPR001878] (1); GAG-pre-integrase domain [IPR025724] (1)                                                                                                                                                                          | scaffold_9_mRNA_1413.1          | -                           | -                               |
| GF0032924 | 1                            | 0                        | 0                            | Hypothetical protein (1)                                          |                                                                                                                                                                                                                                                                                                                        |                                                                                                                                                                                                                                                           | scaffold_9_mRNA_1409.1          | -                           | -                               |
| GF0032923 | 1                            | 0                        | 0                            | Hypothetical protein (1)                                          | regulation of transcription, DNA-templated [GO:0006355 biological_process] (1)                                                                                                                                                                                                                                         | FHY3/FAR1 family [IPR01052] (1)                                                                                                                                                                                                                           | scaffold_9_mRNA_1407.1          | -                           | -                               |
| GF0032922 | 1                            | 0                        | 0                            | Hypothetical protein (1)                                          |                                                                                                                                                                                                                                                                                                                        |                                                                                                                                                                                                                                                           | scaffold_9_mRNA_1406.1          | -                           | -                               |
| GF0032921 | 1                            | 0                        | 0                            | Hypothetical protein (1)                                          | protein dimerization activity [GO:0046983 molecular_function] (1); nucleic acid binding [GO:0003676 molecular_function] (1)                                                                                                                                                                                            | HAT, C-terminal dimerisation domain [IPR008906] (1); Ribonuclease H-like domain [IPR012337] (1)                                                                                                                                                           | scaffold_9_mRNA_1395.1          | -                           | -                               |
| GF0032920 | 1                            | 0                        | 0                            | Hypothetical protein (1)                                          |                                                                                                                                                                                                                                                                                                                        |                                                                                                                                                                                                                                                           | scaffold_9_mRNA_1394.1          | -                           | -                               |
| GF0032919 | 1                            | 0                        | 0                            | UPF0481 protein (1)                                               |                                                                                                                                                                                                                                                                                                                        | Protein of unknown function DUF247, plant [IPR004158] (1)                                                                                                                                                                                                 | scaffold_9_mRNA_1378.1          | -                           | -                               |
| GF0032918 | 1                            | 0                        | 0                            | Hypothetical protein (1)                                          |                                                                                                                                                                                                                                                                                                                        |                                                                                                                                                                                                                                                           | scaffold_9_mRNA_1377.1          | -                           | -                               |
| GF0032917 | 1                            | 0                        | 0                            | Hypothetical protein (1)                                          |                                                                                                                                                                                                                                                                                                                        | Zinc knuckle CX2CX4HX4C [IPR025836] (1)                                                                                                                                                                                                                   | scaffold_9_mRNA_1376.1          | -                           | -                               |
| GF0032916 | 1                            | 0                        | 0                            | Hypothetical protein (1)                                          | protein dimerization activity [GO:0046983 molecular_function] (1); nucleic acid binding [GO:0003676 molecular_function] (1)                                                                                                                                                                                            | HAT, C-terminal dimerisation domain [IPR008906] (1); Ribonuclease H-like domain [IPR012337] (1)                                                                                                                                                           | scaffold_9_mRNA_1373.1          | -                           | -                               |
| GF0032915 | 1                            | 0                        | 0                            | UPF0481 protein (1)                                               |                                                                                                                                                                                                                                                                                                                        | Protein of unknown function DUF247, plant [IPR004158] (1)                                                                                                                                                                                                 | scaffold_9_mRNA_1372.1          | -                           | -                               |
| GF0032914 | 1                            | 0                        | 0                            | Hypothetical protein (1)                                          | protein dimerization activity [GO:0046983 molecular_function] (1); nucleic acid binding [GO:0003676 molecular_function] (1)                                                                                                                                                                                            | Ribonuclease H-like domain [IPR012337] (1); HAT, C-terminal dimerisation domain [IPR008906] (1)                                                                                                                                                           | scaffold_9_mRNA_1371.1          | -                           | -                               |
| GF0032913 | 1                            | 0                        | 0                            | Hypothetical protein (1)                                          | protein dimerization activity [GO:0046983 molecular_function] (1); nucleic acid binding [GO:0003676 molecular_function] (1)                                                                                                                                                                                            | Ribonuclease H-like domain [IPR012337] (1); HAT, C-terminal dimerisation domain [IPR008906] (1)                                                                                                                                                           | scaffold_9_mRNA_1359.1          | -                           | -                               |
| GF0032912 | 1                            | 0                        | 0                            | Hypothetical protein (1)                                          |                                                                                                                                                                                                                                                                                                                        | Protein of unknown function DUF247, plant [IPR004158] (1)                                                                                                                                                                                                 | scaffold_9_mRNA_1353.1          | -                           | -                               |
| GF0032911 | 1                            | 0                        | 0                            | Hypothetical protein (1)                                          |                                                                                                                                                                                                                                                                                                                        | Protein of unknown function DUF247, plant [IPR004158] (1)                                                                                                                                                                                                 | scaffold_9_mRNA_1352.1          | -                           | -                               |
| GF0032910 | 1                            | 0                        | 0                            | Hypothetical protein (1)                                          |                                                                                                                                                                                                                                                                                                                        | Protein of unknown function DUF247, plant [IPR004158] (1)                                                                                                                                                                                                 | scaffold_9_mRNA_1350.1          | -                           | -                               |
| GF0032909 | 1                            | 0                        | 0                            | Hypothetical protein (1)                                          |                                                                                                                                                                                                                                                                                                                        |                                                                                                                                                                                                                                                           | scaffold_9_mRNA_1344.1          | -                           | -                               |
| GF0032908 | 1                            | 0                        | 0                            | RNA-directed DNA polymerase (Reverse transcriptase) (1)           | nucleic acid binding [GO:0003676 molecular_function] (1)                                                                                                                                                                                                                                                               | Reverse transcriptase domain [IPR000477] (1); Ribonuclease H-like domain [IPR012337] (1); Reverse transcriptase zinc-binding domain [IPR026960] (1)                                                                                                       | scaffold_9_mRNA_1343.1          | -                           | -                               |
| GF0032907 | 1                            | 0                        | 0                            | Zinc knuckle family protein (1)                                   | nucleic acid binding [GO:0003676 molecular_function] (1); zinc ion binding [GO:0008270 molecular_function] (1)                                                                                                                                                                                                         | Zinc finger, CCHC-type [IPR001878] (1)                                                                                                                                                                                                                    | scaffold_9_mRNA_1342.1          | -                           | -                               |
| GF0032906 | 1                            | 0                        | 0                            | Hypothetical protein (1)                                          |                                                                                                                                                                                                                                                                                                                        | Protein of unknown function DUF247, plant [IPR004158] (1)                                                                                                                                                                                                 | scaffold_9_mRNA_1336.1          | -                           | -                               |
| GF0032905 | 1                            | 0                        | 0                            | DUF247 domain protein (1)                                         |                                                                                                                                                                                                                                                                                                                        | Protein of unknown function DUF247, plant [IPR004158] (1)                                                                                                                                                                                                 | scaffold_9_mRNA_1335.1          | -                           | -                               |
| GF0032904 | 1                            | 0                        | 0                            | Hypothetical protein (1)                                          |                                                                                                                                                                                                                                                                                                                        |                                                                                                                                                                                                                                                           | scaffold_9_mRNA_1323.1          | -                           | -                               |
| GF0032903 | 1                            | 0                        | 0                            | Hypothetical protein (1)                                          |                                                                                                                                                                                                                                                                                                                        |                                                                                                                                                                                                                                                           | scaffold_9_mRNA_1322.1          | -                           | -                               |

| ID        | Num. in <i>C. celeratae</i> | Num. in <i>C. uchiha</i> | Num. in <i>P. trifoliata</i> | Note                                                            | GO                                                                                                                                                                                                                                                                                                                    | InterPro                                                                                                                                                                        | Members in <i>C. celeratae</i> | Members in <i>C. uchiha</i> | Members in <i>P. trifoliata</i> |
|-----------|-----------------------------|--------------------------|------------------------------|-----------------------------------------------------------------|-----------------------------------------------------------------------------------------------------------------------------------------------------------------------------------------------------------------------------------------------------------------------------------------------------------------------|---------------------------------------------------------------------------------------------------------------------------------------------------------------------------------|--------------------------------|-----------------------------|---------------------------------|
| GF0032902 | 1                           | 0                        | 0                            | 0 Hypothetical protein (1)                                      |                                                                                                                                                                                                                                                                                                                       |                                                                                                                                                                                 | scaffold_9_mRNA_1316.1         | -                           | -                               |
| GF0032901 | 1                           | 0                        | 0                            | 0 Hypothetical protein (1)                                      |                                                                                                                                                                                                                                                                                                                       | LOG family [IPR031100] (1)                                                                                                                                                      | scaffold_9_mRNA_1315.1         | -                           | -                               |
| GF0032900 | 1                           | 0                        | 0                            | 0 Hypothetical protein (1)                                      | nucleic acid binding [GO:0003676 molecular_function] (1); protein dimerization activity [GO:0046983 molecular_function] (1)                                                                                                                                                                                           | Ribonuclease H-like domain [IPR012337] (1); HAT, C-terminal dimerisation domain [IPR008906] (1)                                                                                 | scaffold_9_mRNA_1313.1         | -                           | -                               |
| GF0032899 | 1                           | 0                        | 0                            | 0 Hypothetical protein (1)                                      |                                                                                                                                                                                                                                                                                                                       | Plant self-incompatibility S1 [IPR010264] (1)                                                                                                                                   | scaffold_9_mRNA_1309.1         | -                           | -                               |
| GF0032898 | 1                           | 0                        | 0                            | 0 Cytochrome P450 (1)                                           | heme binding [GO:0020037 molecular_function] (1); iron ion binding [GO:0005506 molecular_function] (1); oxidoreductase activity, acting on paired donors, with incorporation or reduction of molecular oxygen [GO:0016705 molecular_function] (1); oxidation-reduction process [GO:0055114 biological_process] (1)    | Cytochrome P450 [IPR001128] (1)                                                                                                                                                 | scaffold_9_mRNA_1308.1         | -                           | -                               |
| GF0032897 | 1                           | 0                        | 0                            | 0 Hypothetical protein (1)                                      |                                                                                                                                                                                                                                                                                                                       |                                                                                                                                                                                 | scaffold_9_mRNA_1307.1         | -                           | -                               |
| GF0032896 | 1                           | 0                        | 0                            | 0 Hypothetical protein (1)                                      |                                                                                                                                                                                                                                                                                                                       | Plant self-incompatibility S1 [IPR010264] (1)                                                                                                                                   | scaffold_9_mRNA_1304.1         | -                           | -                               |
| GF0032895 | 1                           | 0                        | 0                            | 0 Hypothetical protein (1)                                      |                                                                                                                                                                                                                                                                                                                       |                                                                                                                                                                                 | scaffold_9_mRNA_1302.1         | -                           | -                               |
| GF0032894 | 1                           | 0                        | 0                            | 0 Hypothetical protein (1)                                      |                                                                                                                                                                                                                                                                                                                       |                                                                                                                                                                                 | scaffold_9_mRNA_1300.1         | -                           | -                               |
| GF0032893 | 1                           | 0                        | 0                            | 0 Hypothetical protein (1)                                      | regulation of transcription, DNA-templated [GO:0006355 biological_process] (1); nucleic acid binding [GO:0003676 molecular_function] (1)                                                                                                                                                                              | Carlavirus nucleic acid-binding protein [IPR025468] (1)                                                                                                                         | scaffold_9_mRNA_1295.1         | -                           | -                               |
| GF0032892 | 1                           | 0                        | 0                            | 0 Hypothetical protein (1)                                      |                                                                                                                                                                                                                                                                                                                       |                                                                                                                                                                                 | scaffold_9_mRNA_1294.1         | -                           | -                               |
| GF0032891 | 1                           | 0                        | 0                            | 0 Cytokinin riboside 5'-monophosphate phosphoribohydrolase (1)  |                                                                                                                                                                                                                                                                                                                       | LOG family [IPR031100] (1)                                                                                                                                                      | scaffold_9_mRNA_1293.1         | -                           | -                               |
| GF0032890 | 1                           | 0                        | 0                            | 0 Hypothetical protein (1)                                      |                                                                                                                                                                                                                                                                                                                       |                                                                                                                                                                                 | scaffold_9_mRNA_1292.1         | -                           | -                               |
| GF0032889 | 1                           | 0                        | 0                            | 0 Hypothetical protein (1)                                      |                                                                                                                                                                                                                                                                                                                       |                                                                                                                                                                                 | scaffold_9_mRNA_1289.1         | -                           | -                               |
| GF0032888 | 1                           | 0                        | 0                            | 0 Hypothetical protein (1)                                      |                                                                                                                                                                                                                                                                                                                       |                                                                                                                                                                                 | scaffold_9_mRNA_1280.1         | -                           | -                               |
| GF0032887 | 1                           | 0                        | 0                            | 0 Hypothetical protein (1)                                      | nucleic acid binding [GO:0003676 molecular_function] (1); DNA binding [GO:003677 molecular_function] (1)                                                                                                                                                                                                              | Zinc finger, BED-type [IPR003656] (1); Zinc finger C2H2-type [IPR013087] (1)                                                                                                    | scaffold_9_mRNA_1279.1         | -                           | -                               |
| GF0032886 | 1                           | 0                        | 0                            | 0 Hypothetical protein (1)                                      |                                                                                                                                                                                                                                                                                                                       |                                                                                                                                                                                 | scaffold_9_mRNA_1278.1         | -                           | -                               |
| GF0032885 | 1                           | 0                        | 0                            | 0 Hypothetical protein (1)                                      | regulation of transcription, DNA-templated [GO:0006355 biological_process] (1); nucleic acid binding [GO:0003676 molecular_function] (1)                                                                                                                                                                              | Carlavirus nucleic acid-binding protein [IPR025468] (1)                                                                                                                         | scaffold_9_mRNA_1277.1         | -                           | -                               |
| GF0032884 | 1                           | 0                        | 0                            | 0 Cytokinin riboside 5'-monophosphate phosphoribohydrolase (1)  |                                                                                                                                                                                                                                                                                                                       | LOG family [IPR031100] (1)                                                                                                                                                      | scaffold_9_mRNA_1276.1         | -                           | -                               |
| GF0032883 | 1                           | 0                        | 0                            | 0 Hypothetical protein (1)                                      |                                                                                                                                                                                                                                                                                                                       |                                                                                                                                                                                 | scaffold_9_mRNA_1275.1         | -                           | -                               |
| GF0032882 | 1                           | 0                        | 0                            | 0 Hypothetical protein (1)                                      |                                                                                                                                                                                                                                                                                                                       |                                                                                                                                                                                 | scaffold_9_mRNA_127.1          | -                           | -                               |
| GF0032881 | 1                           | 0                        | 0                            | 0 Cytokinin riboside 5'-monophosphate phosphoribohydrolase (1)  |                                                                                                                                                                                                                                                                                                                       | LOG family [IPR031100] (1)                                                                                                                                                      | scaffold_9_mRNA_1259.1         | -                           | -                               |
| GF0032880 | 1                           | 0                        | 0                            | 0 Hypothetical protein (1)                                      |                                                                                                                                                                                                                                                                                                                       | Transposon, En/Spm-like [IPR004242] (1); Transposase-associated domain [IPR029480] (1)                                                                                          | scaffold_9_mRNA_1258.1         | -                           | -                               |
| GF0032879 | 1                           | 0                        | 0                            | 0 Hypothetical protein (1)                                      |                                                                                                                                                                                                                                                                                                                       |                                                                                                                                                                                 | scaffold_9_mRNA_1250.1         | -                           | -                               |
| GF0032878 | 1                           | 0                        | 0                            | 0 Hypothetical protein (1)                                      |                                                                                                                                                                                                                                                                                                                       |                                                                                                                                                                                 | scaffold_9_mRNA_1246.1         | -                           | -                               |
| GF0032877 | 1                           | 0                        | 0                            | 0 Hypothetical protein (1)                                      |                                                                                                                                                                                                                                                                                                                       |                                                                                                                                                                                 | scaffold_9_mRNA_1244.1         | -                           | -                               |
| GF0032876 | 1                           | 0                        | 0                            | 0 Hypothetical protein (1)                                      |                                                                                                                                                                                                                                                                                                                       |                                                                                                                                                                                 | scaffold_9_mRNA_1243.1         | -                           | -                               |
| GF0032875 | 1                           | 0                        | 0                            | 0 Hypothetical protein (1)                                      |                                                                                                                                                                                                                                                                                                                       |                                                                                                                                                                                 | scaffold_9_mRNA_1242.1         | -                           | -                               |
| GF0032874 | 1                           | 0                        | 0                            | 0 Hypothetical protein (1)                                      |                                                                                                                                                                                                                                                                                                                       |                                                                                                                                                                                 | scaffold_9_mRNA_1237.1         | -                           | -                               |
| GF0032873 | 1                           | 0                        | 0                            | 0 Hypothetical protein (1)                                      |                                                                                                                                                                                                                                                                                                                       |                                                                                                                                                                                 | scaffold_9_mRNA_1236.1         | -                           | -                               |
| GF0032872 | 1                           | 0                        | 0                            | 0 BED zinc finger, HAT family dimerization domain isoform 1 (1) | nucleic acid binding [GO:0003676 molecular_function] (1); protein dimerization activity [GO:0046983 molecular_function] (1); DNA binding [GO:0003677 molecular_function] (1)                                                                                                                                          | Ribonuclease H-like domain [IPR012337] (1); bAT-like transposase, RNase-H fold [IPR025523] (1); HAT, C-terminal dimerisation domain [IPR008906] (1)                             | scaffold_9_mRNA_1234.1         | -                           | -                               |
| GF0032871 | 1                           | 0                        | 0                            | 0 Hypothetical protein (1)                                      |                                                                                                                                                                                                                                                                                                                       |                                                                                                                                                                                 | scaffold_9_mRNA_1233.1         | -                           | -                               |
| GF0032870 | 1                           | 0                        | 0                            | 0 Hypothetical protein (1)                                      |                                                                                                                                                                                                                                                                                                                       |                                                                                                                                                                                 | scaffold_9_mRNA_1231.1         | -                           | -                               |
| GF0032869 | 1                           | 0                        | 0                            | 0 Cytokinin riboside 5'-monophosphate phosphoribohydrolase (1)  |                                                                                                                                                                                                                                                                                                                       |                                                                                                                                                                                 | scaffold_9_mRNA_1230.1         | -                           | -                               |
| GF0032868 | 1                           | 0                        | 0                            | 0 Hypothetical protein (1)                                      |                                                                                                                                                                                                                                                                                                                       |                                                                                                                                                                                 | scaffold_9_mRNA_1228.1         | -                           | -                               |
| GF0032867 | 1                           | 0                        | 0                            | 0 Hypothetical protein (1)                                      |                                                                                                                                                                                                                                                                                                                       | Retrotransposon gag domain [IPR005162] (1)                                                                                                                                      | scaffold_9_mRNA_1227.1         | -                           | -                               |
| GF0032866 | 1                           | 0                        | 0                            | 0 Hypothetical protein (1)                                      | signal transduction [GO:0007165 biological_process] (1); protein binding [GO:0005515 molecular_function] (1)                                                                                                                                                                                                          | Winged helix-turn-helix DNA-binding domain [IPR011991] (1); DDB/GK domain containing protein [IPR019153] (1); Toll/interleukin-1 receptor homology (TIR) domain [IPR000157] (1) | scaffold_9_mRNA_1222.1         | -                           | -                               |
| GF0032865 | 1                           | 0                        | 0                            | 0 Hypothetical protein (1)                                      |                                                                                                                                                                                                                                                                                                                       |                                                                                                                                                                                 | scaffold_9_mRNA_1215.1         | -                           | -                               |
| GF0032864 | 1                           | 0                        | 0                            | 0 Hypothetical protein (1)                                      | nucleic acid binding [GO:0003676 molecular_function] (1); protein binding [GO:0005515 molecular_function] (1)                                                                                                                                                                                                         | F-box domain [IPR001810] (1); Ribonuclease H-like domain [IPR012337] (1)                                                                                                        | scaffold_9_mRNA_1197.1         | -                           | -                               |
| GF0032863 | 1                           | 0                        | 0                            | 0 Hypothetical protein (1)                                      | nucleic acid binding [GO:0003676 molecular_function] (1)                                                                                                                                                                                                                                                              | Ribonuclease H-like domain [IPR012337] (1)                                                                                                                                      | scaffold_9_mRNA_1195.1         | -                           | -                               |
| GF0032862 | 1                           | 0                        | 0                            | 0 Hypothetical protein (1)                                      |                                                                                                                                                                                                                                                                                                                       | Chromo domain-like [IPR016197] (1)                                                                                                                                              | scaffold_9_mRNA_1190.1         | -                           | -                               |
| GF0032861 | 1                           | 0                        | 0                            | 0 Hypothetical protein (1)                                      |                                                                                                                                                                                                                                                                                                                       | Retrotransposon gag domain [IPR005162] (1)                                                                                                                                      | scaffold_9_mRNA_1183.1         | -                           | -                               |
| GF0032860 | 1                           | 0                        | 0                            | 0 Monosaccharide transport protein (1)                          |                                                                                                                                                                                                                                                                                                                       |                                                                                                                                                                                 | scaffold_9_mRNA_1182.1         | -                           | -                               |
| GF0032859 | 1                           | 0                        | 0                            | 0 Hypothetical protein (1)                                      | protein binding [GO:0005515 molecular_function] (1)                                                                                                                                                                                                                                                                   | F-box domain [IPR001810] (1)                                                                                                                                                    | scaffold_9_mRNA_1181.1         | -                           | -                               |
| GF0032858 | 1                           | 0                        | 0                            | 0 Hypothetical protein (1)                                      | regulation of defense response [GO:0031347 biological_process] (1); regulation of salicylic acid mediated signaling pathway [GO:2000031 biological_process] (1); cellular response to salicylic acid stimulus [GO:0071446 biological_process] (1); integral component of membrane [GO:0016021 cellular_component] (1) | PGG domain [IPR026961] (1); Protein accelerated cell death 6 [IPR032846] (1)                                                                                                    | scaffold_9_mRNA_1180.1         | -                           | -                               |
| GF0032857 | 1                           | 0                        | 0                            | 0 Ankyrin repeat family protein, putative (1)                   | regulation of defense response [GO:0031347 biological_process] (1); protein binding [GO:0005515 molecular_function] (1); integral component of membrane [GO:0016021 cellular_component] (1); cellular response to salicylic acid stimulus [GO:0071446 biological_process] (1)                                         | Ankyrin repeat [IPR002110] (1); Protein accelerated cell death 6 [IPR032846] (1); PGG domain [IPR026961] (1); Ankyrin repeat-containing domain [IPR020683] (1)                  | scaffold_9_mRNA_1179.1         | -                           | -                               |
| GF0032856 | 1                           | 0                        | 0                            | 0 Hypothetical protein (1)                                      |                                                                                                                                                                                                                                                                                                                       |                                                                                                                                                                                 | scaffold_9_mRNA_1177.1         | -                           | -                               |
| GF0032855 | 1                           | 0                        | 0                            | 0 Hypothetical protein (1)                                      | transport [GO:0006810 biological_process] (1); membrane [GO:0016020 cellular_component] (1); transporter activity [GO:0005215 molecular_function] (1)                                                                                                                                                                 | Proton-dependent oligopeptide transporter family [IPR001009] (1)                                                                                                                | scaffold_9_mRNA_1167.1         | -                           | -                               |
| GF0032854 | 1                           | 0                        | 0                            | 0 Hypothetical protein (1)                                      | proteolysis [GO:0006508 biological_process] (1); aspartic-type endopeptidase activity [GO:0004190 molecular_function] (1)                                                                                                                                                                                             | Aspartic peptidase, active site [IPR001969] (1); Aspartic peptidase domain [IPR021109] (1)                                                                                      | scaffold_9_mRNA_1165.1         | -                           | -                               |
| GF0032853 | 1                           | 0                        | 0                            | 0 Hypothetical protein (1)                                      |                                                                                                                                                                                                                                                                                                                       |                                                                                                                                                                                 | scaffold_9_mRNA_1164.1         | -                           | -                               |
| GF0032852 | 1                           | 0                        | 0                            | 0 Reverse transcriptase, related (1)                            | nucleic acid binding [GO:0003676 molecular_function] (1)                                                                                                                                                                                                                                                              | Ribonuclease H-like domain [IPR012337] (1); Endonuclease/exonuclease/phosphatase [IPR005135] (1)                                                                                | scaffold_9_mRNA_1163.1         | -                           | -                               |
| GF0032851 | 1                           | 0                        | 0                            | 0 MATE efflux family protein 9 (1)                              | antiporter activity [GO:0015297 molecular_function] (1); drug transmembrane transporter activity [GO:0015238 molecular_function] (1); membrane [GO:0016020 cellular_component] (1); drug transmembrane transport [GO:0006855 biological_process] (1); transmembrane transport [GO:0055085 biological_process] (1)     | Multi antimicrobial extrusion protein [IPR025258] (1)                                                                                                                           | scaffold_9_mRNA_1155.1         | -                           | -                               |
| GF0032850 | 1                           | 0                        | 0                            | 0 Hypothetical protein (1)                                      |                                                                                                                                                                                                                                                                                                                       | Isopenicillin N synthase-like [IPR027443] (1)                                                                                                                                   | scaffold_9_mRNA_1149.1         | -                           | -                               |
| GF0032849 | 1                           | 0                        | 0                            | 0 Putative MATE efflux family protein 5-like (1)                | drug transmembrane transport [GO:0006855 biological_process] (1); antiporter activity [GO:0015297 molecular_function] (1); drug transmembrane transporter activity [GO:0015238 molecular_function] (1); membrane [GO:0016020 cellular_component] (1); transmembrane transport [GO:0055085 biological_process] (1)     | Multi antimicrobial extrusion protein [IPR025258] (1)                                                                                                                           | scaffold_9_mRNA_1143.1         | -                           | -                               |

| ID        | Num. in <i>C. clementinae</i> | Num. in <i>C. uchiha</i> | Num. in <i>P. trifoliata</i> | Note                                                           | GO                                                                                                                                                                                                                                                                                                                                                                    | InterPro                                                                                                                                                                                                                                                                                                                                                                  | Members in <i>C. clementinae</i> | Members in <i>C. uchiha</i> | Members in <i>P. trifoliata</i> |
|-----------|-------------------------------|--------------------------|------------------------------|----------------------------------------------------------------|-----------------------------------------------------------------------------------------------------------------------------------------------------------------------------------------------------------------------------------------------------------------------------------------------------------------------------------------------------------------------|---------------------------------------------------------------------------------------------------------------------------------------------------------------------------------------------------------------------------------------------------------------------------------------------------------------------------------------------------------------------------|----------------------------------|-----------------------------|---------------------------------|
| GF0032848 | 1                             | 0                        | 0                            | 0 Tau class glutathione S-transferase (1)                      | protein binding [GO:0005515 molecular_function] (1)                                                                                                                                                                                                                                                                                                                   | Thioredoxin-like fold [IPRO12336] (1); Glutathione S-transferase, C-terminal [IPRO04046] (1); Glutathione S-transferase, N-terminal [IPRO04045] (1); Glutathione S-transferase, C-terminal-like [IPRO10987] (1); Glutathione S-transferase, N-terminal [IPRO04045] (1); Glutathione S-transferase, C-terminal-like [IPRO10987] (1); Thioredoxin-like fold [IPRO12336] (1) | scaffold_9_mRNA_1142.1           | -                           | -                               |
| GF0032847 | 1                             | 0                        | 0                            | 0 Tau class glutathione S-transferase (1)                      | protein binding [GO:0005515 molecular_function] (1)                                                                                                                                                                                                                                                                                                                   | Thioredoxin-like fold [IPRO12336] (1); Glutathione S-transferase, C-terminal [IPRO04046] (1); Glutathione S-transferase, N-terminal [IPRO04045] (1); Glutathione S-transferase, C-terminal-like [IPRO10987] (1)                                                                                                                                                           | scaffold_9_mRNA_1141.1           | -                           | -                               |
| GF0032846 | 1                             | 0                        | 0                            | 0 Hypothetical protein (1)                                     |                                                                                                                                                                                                                                                                                                                                                                       |                                                                                                                                                                                                                                                                                                                                                                           | scaffold_9_mRNA_1139.1           | -                           | -                               |
| GF0032845 | 1                             | 0                        | 0                            | 0 Hypothetical protein (1)                                     |                                                                                                                                                                                                                                                                                                                                                                       |                                                                                                                                                                                                                                                                                                                                                                           | scaffold_9_mRNA_1138.1           | -                           | -                               |
| GF0032844 | 1                             | 0                        | 0                            | 0 Hypothetical protein (1)                                     |                                                                                                                                                                                                                                                                                                                                                                       | Retrotransposon gag domain [IPRO05162] (1)                                                                                                                                                                                                                                                                                                                                | scaffold_9_mRNA_1137.1           | -                           | -                               |
| GF0032843 | 1                             | 0                        | 0                            | 0 Hypothetical protein (1)                                     |                                                                                                                                                                                                                                                                                                                                                                       |                                                                                                                                                                                                                                                                                                                                                                           | scaffold_9_mRNA_1136.1           | -                           | -                               |
| GF0032842 | 1                             | 0                        | 0                            | 0 Hypothetical protein (1)                                     |                                                                                                                                                                                                                                                                                                                                                                       |                                                                                                                                                                                                                                                                                                                                                                           | scaffold_9_mRNA_1133.1           | -                           | -                               |
| GF0032841 | 1                             | 0                        | 0                            | 0 Hypothetical protein (1)                                     |                                                                                                                                                                                                                                                                                                                                                                       |                                                                                                                                                                                                                                                                                                                                                                           | scaffold_9_mRNA_1131.1           | -                           | -                               |
| GF0032840 | 1                             | 0                        | 0                            | 0 Tau class glutathione S-transferase (1)                      | protein binding [GO:0005515 molecular_function] (1)                                                                                                                                                                                                                                                                                                                   | Thioredoxin-like fold [IPRO12336] (1); Glutathione S-transferase, C-terminal [IPRO04046] (1); Glutathione S-transferase, N-terminal [IPRO04045] (1); Glutathione S-transferase, C-terminal-like [IPRO10987] (1)                                                                                                                                                           | scaffold_9_mRNA_1129.1           | -                           | -                               |
| GF0032839 | 1                             | 0                        | 0                            | 0 Glutathione S-transferase tau 7, putative (1)                |                                                                                                                                                                                                                                                                                                                                                                       | Glutathione S-transferase, C-terminal-like [IPRO10987] (1); Glutathione S-transferase, C-terminal [IPRO04046] (1)                                                                                                                                                                                                                                                         | scaffold_9_mRNA_1124.1           | -                           | -                               |
| GF0032838 | 1                             | 0                        | 0                            | 0 Hypothetical protein (1)                                     | nucleic acid binding [GO:0003676 molecular_function] (1); DNA binding [GO:0003677 molecular_function] (1) transport [GO:0006810 biological_process] (1); membrane [GO:0016020 cellular_component] (1); transporter activity [GO:0005215 molecular_function] (1)                                                                                                       | Zinc finger, BED-type [IPRO03656] (1); Zinc finger C2H2-type [IPRO13087] (1)                                                                                                                                                                                                                                                                                              | scaffold_9_mRNA_1119.1           | -                           | -                               |
| GF0032837 | 1                             | 0                        | 0                            | 0 Hypothetical protein (1)                                     |                                                                                                                                                                                                                                                                                                                                                                       | Proton-dependent oligopeptide transporter family [IPRO0109] (1)                                                                                                                                                                                                                                                                                                           | scaffold_9_mRNA_1113.1           | -                           | -                               |
| GF0032836 | 1                             | 0                        | 0                            | 0 Hypothetical protein (1)                                     | protein binding [GO:0005515 molecular_function] (1) transmembrane transport [GO:0055085 biological_process] (1); drug transmembrane transporter activity [GO:0015238 molecular_function] (1); antiporter activity [GO:0015297 molecular_function] (1); membrane [GO:0016020 cellular_component] (1); drug transmembrane transport [GO:0006855 biological_process] (1) | Thioredoxin-like fold [IPRO12336] (1); Glutathione S-transferase, N-terminal [IPRO04045] (1)                                                                                                                                                                                                                                                                              | scaffold_9_mRNA_1109.1           | -                           | -                               |
| GF0032835 | 1                             | 0                        | 0                            | 0 MATE efflux family protein 9 (1)                             |                                                                                                                                                                                                                                                                                                                                                                       | Multi antimicrobial extrusion protein [IPRO02528] (1)                                                                                                                                                                                                                                                                                                                     | scaffold_9_mRNA_1108.1           | -                           | -                               |
| GF0032834 | 1                             | 0                        | 0                            | 0 Tau class glutathione S-transferase (1)                      | protein binding [GO:0005515 molecular_function] (1)                                                                                                                                                                                                                                                                                                                   | Glutathione S-transferase, N-terminal [IPRO04045] (1); Glutathione S-transferase, C-terminal-like [IPRO10987] (1); Thioredoxin-like fold [IPRO12336] (1); Glutathione S-transferase, C-terminal [IPRO04046] (1)                                                                                                                                                           | scaffold_9_mRNA_1107.1           | -                           | -                               |
| GF0032833 | 1                             | 0                        | 0                            | 0 Tau class glutathione S-transferase (1)                      | protein binding [GO:0005515 molecular_function] (1)                                                                                                                                                                                                                                                                                                                   | Glutathione S-transferase, C-terminal-like [IPRO10987] (1); Glutathione S-transferase, N-terminal [IPRO04045] (1); Glutathione S-transferase, C-terminal [IPRO04046] (1); Thioredoxin-like fold [IPRO12336] (1)                                                                                                                                                           | scaffold_9_mRNA_1105.1           | -                           | -                               |
| GF0032832 | 1                             | 0                        | 0                            | 0 Transposon-like ORF protein (1)                              |                                                                                                                                                                                                                                                                                                                                                                       | Domain of unknown function DUF4216 [IPRO25112] (1); Transposon, EnSpm-like [IPRO04242] (1)                                                                                                                                                                                                                                                                                | scaffold_9_mRNA_1104.1           | -                           | -                               |
| GF0032831 | 1                             | 0                        | 0                            | 0 Tau class glutathione S-transferase (1)                      | protein binding [GO:0005515 molecular_function] (1)                                                                                                                                                                                                                                                                                                                   | Thioredoxin-like fold [IPRO12336] (1); Glutathione S-transferase, N-terminal [IPRO04045] (1); Glutathione S-transferase, C-terminal-like [IPRO10987] (1)                                                                                                                                                                                                                  | scaffold_9_mRNA_1103.1           | -                           | -                               |
| GF0032830 | 1                             | 0                        | 0                            | 0 Hypothetical protein (1)                                     |                                                                                                                                                                                                                                                                                                                                                                       |                                                                                                                                                                                                                                                                                                                                                                           | scaffold_9_mRNA_1099.1           | -                           | -                               |
| GF0032829 | 1                             | 0                        | 0                            | 0 Hypothetical protein (1)                                     | DNA binding [GO:0003677 molecular_function] (1); regulation of transcription, DNA-templated [GO:0006355 biological_process] (1)                                                                                                                                                                                                                                       | B3 DNA binding domain [IPRO03340] (1); NAC domain [IPRO03441] (1); DNA-binding pseudobarrel domain [IPRO15300] (1)                                                                                                                                                                                                                                                        | scaffold_9_mRNA_1098.1           | -                           | -                               |
| GF0032828 | 1                             | 0                        | 0                            | 0 Glutathione S-transferase tau 7, putative (1)                |                                                                                                                                                                                                                                                                                                                                                                       | Glutathione S-transferase, C-terminal-like [IPRO10987] (1)                                                                                                                                                                                                                                                                                                                | scaffold_9_mRNA_1096.1           | -                           | -                               |
| GF0032827 | 1                             | 0                        | 0                            | 0 Hypothetical protein (1)                                     |                                                                                                                                                                                                                                                                                                                                                                       | Domain of unknown function DUF4283 [IPRO25558] (1)                                                                                                                                                                                                                                                                                                                        | scaffold_9_mRNA_1090.1           | -                           | -                               |
| GF0032826 | 1                             | 0                        | 0                            | 0 Hypothetical protein (1)                                     |                                                                                                                                                                                                                                                                                                                                                                       |                                                                                                                                                                                                                                                                                                                                                                           | scaffold_9_mRNA_1088.1           | -                           | -                               |
| GF0032825 | 1                             | 0                        | 0                            | 0 Cytokinin riboside 5'-monophosphate phosphoribohydrolase (1) |                                                                                                                                                                                                                                                                                                                                                                       | LOG family [IPRO31100] (1); Cytokinin riboside 5'-monophosphate phosphoribohydrolase LOG [IPRO05269] (1)                                                                                                                                                                                                                                                                  | scaffold_9_mRNA_1087.1           | -                           | -                               |
| GF0032824 | 1                             | 0                        | 0                            | 0 Hypothetical protein (1)                                     |                                                                                                                                                                                                                                                                                                                                                                       | Reverse transcriptase zinc-binding domain [IPRO26960] (1)                                                                                                                                                                                                                                                                                                                 | scaffold_9_mRNA_1084.1           | -                           | -                               |
| GF0032823 | 1                             | 0                        | 0                            | 0 Hypothetical protein (1)                                     |                                                                                                                                                                                                                                                                                                                                                                       |                                                                                                                                                                                                                                                                                                                                                                           | scaffold_9_mRNA_1083.1           | -                           | -                               |
| GF0032822 | 1                             | 0                        | 0                            | 0 Hypothetical protein (1)                                     | protein binding [GO:0005515 molecular_function] (1)                                                                                                                                                                                                                                                                                                                   | Pentatricopeptide repeat [IPRO02385] (1); Tetra-tricopeptide-like helical domain [IPRO11990] (1)                                                                                                                                                                                                                                                                          | scaffold_9_mRNA_1079.1           | -                           | -                               |
| GF0032821 | 1                             | 0                        | 0                            | 0 Hypothetical protein (1)                                     | ADP binding [GO:0043531 molecular_function] (1)                                                                                                                                                                                                                                                                                                                       | P-loop containing nucleoside triphosphate hydrolase [IPRO27417] (1); NB-ARC [IPRO2132] (1)                                                                                                                                                                                                                                                                                | scaffold_9_mRNA_1065.1           | -                           | -                               |
| GF0032820 | 1                             | 0                        | 0                            | 0 Hypothetical protein (1)                                     |                                                                                                                                                                                                                                                                                                                                                                       |                                                                                                                                                                                                                                                                                                                                                                           | scaffold_9_mRNA_1064.1           | -                           | -                               |
| GF0032819 | 1                             | 0                        | 0                            | 0 Hypothetical protein (1)                                     |                                                                                                                                                                                                                                                                                                                                                                       | Retrotransposon gag domain [IPRO05162] (1)                                                                                                                                                                                                                                                                                                                                | scaffold_9_mRNA_1063.1           | -                           | -                               |
| GF0032818 | 1                             | 0                        | 0                            | 0 Hypothetical protein (1)                                     |                                                                                                                                                                                                                                                                                                                                                                       |                                                                                                                                                                                                                                                                                                                                                                           | scaffold_9_mRNA_1062.1           | -                           | -                               |
| GF0032817 | 1                             | 0                        | 0                            | 0 Hypothetical protein (1)                                     |                                                                                                                                                                                                                                                                                                                                                                       |                                                                                                                                                                                                                                                                                                                                                                           | scaffold_9_mRNA_1060.1           | -                           | -                               |
| GF0032816 | 1                             | 0                        | 0                            | 0 Hypothetical protein (1)                                     |                                                                                                                                                                                                                                                                                                                                                                       |                                                                                                                                                                                                                                                                                                                                                                           | scaffold_9_mRNA_1054.1           | -                           | -                               |
| GF0032815 | 1                             | 0                        | 0                            | 0 Hypothetical protein (1)                                     | RNA-directed DNA polymerase (Reverse transcriptase) (1)                                                                                                                                                                                                                                                                                                               | Reverse transcriptase domain [IPRO00477] (1)                                                                                                                                                                                                                                                                                                                              | scaffold_9_mRNA_1048.1           | -                           | -                               |
| GF0032814 | 1                             | 0                        | 0                            | 0 Hypothetical protein (1)                                     |                                                                                                                                                                                                                                                                                                                                                                       |                                                                                                                                                                                                                                                                                                                                                                           | scaffold_9_mRNA_1043.1           | -                           | -                               |
| GF0032813 | 1                             | 0                        | 0                            | 0 Hypothetical protein (1)                                     | regulation of transcription, DNA-templated [GO:0006355 biological_process] (1); nucleic acid binding [GO:0003676 molecular_function] (1)                                                                                                                                                                                                                              | Carlavirus nucleic acid-binding protein [IPRO02568] (1)                                                                                                                                                                                                                                                                                                                   | scaffold_9_mRNA_1042.1           | -                           | -                               |
| GF0032812 | 1                             | 0                        | 0                            | 0 Hypothetical protein (1)                                     |                                                                                                                                                                                                                                                                                                                                                                       | Reverse transcriptase, RNA-dependent DNA polymerase [IPRO13103] (1)                                                                                                                                                                                                                                                                                                       | scaffold_9_mRNA_1040.1           | -                           | -                               |
| GF0032811 | 1                             | 0                        | 0                            | 0 Hypothetical protein (1)                                     |                                                                                                                                                                                                                                                                                                                                                                       |                                                                                                                                                                                                                                                                                                                                                                           | scaffold_9_mRNA_1038.1           | -                           | -                               |
| GF0032810 | 1                             | 0                        | 0                            | 0 Hypothetical protein (1)                                     | nucleic acid binding [GO:0003676 molecular_function] (1)                                                                                                                                                                                                                                                                                                              | Reverse transcriptase zinc-binding domain [IPRO26960] (1); Ribonuclease H-like domain [IPRO12337] (1); Endonuclease/cnuclease/phosphatase [IPRO05135] (1)                                                                                                                                                                                                                 | scaffold_9_mRNA_1016.1           | -                           | -                               |
| GF0032809 | 1                             | 0                        | 0                            | 0 Hypothetical protein (1)                                     |                                                                                                                                                                                                                                                                                                                                                                       |                                                                                                                                                                                                                                                                                                                                                                           | scaffold_9_mRNA_1013.1           | -                           | -                               |
| GF0032808 | 1                             | 0                        | 0                            | 0 Hypothetical protein (1)                                     | nucleic acid binding [GO:0003676 molecular_function] (1); DNA binding [GO:0003677 molecular_function] (1)                                                                                                                                                                                                                                                             | Ribonuclease H-like domain [IPRO12337] (1); Zinc finger C2H2-type [IPRO13087] (1); Zinc finger, BED-type [IPRO03656] (1)                                                                                                                                                                                                                                                  | scaffold_9_mRNA_1010.1           | -                           | -                               |
| GF0032807 | 1                             | 0                        | 0                            | 0 Hypothetical protein (1)                                     |                                                                                                                                                                                                                                                                                                                                                                       |                                                                                                                                                                                                                                                                                                                                                                           | scaffold_9_mRNA_1011.1           | -                           | -                               |
| GF0032806 | 1                             | 0                        | 0                            | 0 Hypothetical protein (1)                                     |                                                                                                                                                                                                                                                                                                                                                                       | MULE transposase domain [IPRO18289] (1)                                                                                                                                                                                                                                                                                                                                   | scaffold_9_mRNA_1007.1           | -                           | -                               |
| GF0032805 | 1                             | 0                        | 0                            | 0 Hypothetical protein (1)                                     |                                                                                                                                                                                                                                                                                                                                                                       |                                                                                                                                                                                                                                                                                                                                                                           | scaffold_9_mRNA_1006.1           | -                           | -                               |
| GF0032804 | 1                             | 0                        | 0                            | 0 Hypothetical protein (1)                                     |                                                                                                                                                                                                                                                                                                                                                                       |                                                                                                                                                                                                                                                                                                                                                                           | scaffold_9_mRNA_1001.1           | -                           | -                               |
| GF0032803 | 1                             | 0                        | 0                            | 0 Hypothetical protein (1)                                     |                                                                                                                                                                                                                                                                                                                                                                       |                                                                                                                                                                                                                                                                                                                                                                           | scaffold_9_mRNA_1000.1           | -                           | -                               |
| GF0032802 | 1                             | 0                        | 0                            | 0 Hypothetical protein (1)                                     | proton-transporting two-sector ATPase complex, proton-transporting domain [GO:003177 cellular_component] (1); proton-transporting V-type ATPase, V0 domain [GO:003179 cellular_component] (1); hydrogen ion transmembrane transporter activity [GO:0015078 molecular_function] (1); ATP hydrolysis coupled proton transport [GO:0015991 biological_process] (1)       | V-ATPase proteolipid subunit C, eukaryotic [IPRO11555] (1); V-ATPase proteolipid subunit [IPRO00245] (1); V-ATPase proteolipid subunit C-like domain [IPRO02379] (1)                                                                                                                                                                                                      | scaffold_8_mRNA_998.1            | -                           | -                               |
| GF0032801 | 1                             | 0                        | 0                            | 0 Hypothetical protein (1)                                     |                                                                                                                                                                                                                                                                                                                                                                       |                                                                                                                                                                                                                                                                                                                                                                           | scaffold_8_mRNA_995.1            | -                           | -                               |
| GF0032800 | 1                             | 0                        | 0                            | 0 Hypothetical protein (1)                                     |                                                                                                                                                                                                                                                                                                                                                                       |                                                                                                                                                                                                                                                                                                                                                                           | scaffold_8_mRNA_993.1            | -                           | -                               |
| GF0032799 | 1                             | 0                        | 0                            | 0 Hypothetical protein (1)                                     | nucleic acid binding [GO:0003676 molecular_function] (1)                                                                                                                                                                                                                                                                                                              | Ribonuclease H-like domain [IPRO12337] (1)                                                                                                                                                                                                                                                                                                                                | scaffold_8_mRNA_982.1            | -                           | -                               |
| GF0032798 | 1                             | 0                        | 0                            | 0 Hypothetical protein (1)                                     |                                                                                                                                                                                                                                                                                                                                                                       |                                                                                                                                                                                                                                                                                                                                                                           | scaffold_8_mRNA_976.1            | -                           | -                               |
| GF0032797 | 1                             | 0                        | 0                            | 0 Hypothetical protein (1)                                     |                                                                                                                                                                                                                                                                                                                                                                       |                                                                                                                                                                                                                                                                                                                                                                           | scaffold_8_mRNA_971.1            | -                           | -                               |
| GF0032796 | 1                             | 0                        | 0                            | 0 Hypothetical protein (1)                                     |                                                                                                                                                                                                                                                                                                                                                                       |                                                                                                                                                                                                                                                                                                                                                                           | scaffold_8_mRNA_969.1            | -                           | -                               |
| GF0032795 | 1                             | 0                        | 0                            | 0 Hypothetical protein (1)                                     |                                                                                                                                                                                                                                                                                                                                                                       |                                                                                                                                                                                                                                                                                                                                                                           | scaffold_8_mRNA_968.1            | -                           | -                               |
| GF0032794 | 1                             | 0                        | 0                            | 0 Hypothetical protein (1)                                     | DNA binding [GO:0003677 molecular_function] (1); nucleic acid binding [GO:0003676 molecular_function] (1)                                                                                                                                                                                                                                                             | Zinc finger, BED-type [IPRO03656] (1); Ribonuclease H-like domain [IPRO12337] (1); BAT-like transposase, RNase-H fold [IPRO25525] (1); Zinc finger C2H2-type [IPRO13087] (1)                                                                                                                                                                                              | scaffold_8_mRNA_962.1            | -                           | -                               |

| ID        | Num. in <i>C. celeratae</i> | Num. in <i>C. uchiha</i> | Num. in <i>P. trifoliata</i> | Note                                                           | GO                                                                                                                                                                                                                                                                                      | InterPro                                                                                                                                                                                                                          | Members in <i>C. celeratae</i> | Members in <i>C. uchiha</i> | Members in <i>P. trifoliata</i> |
|-----------|-----------------------------|--------------------------|------------------------------|----------------------------------------------------------------|-----------------------------------------------------------------------------------------------------------------------------------------------------------------------------------------------------------------------------------------------------------------------------------------|-----------------------------------------------------------------------------------------------------------------------------------------------------------------------------------------------------------------------------------|--------------------------------|-----------------------------|---------------------------------|
| GF0032793 | 1                           | 0                        | 0                            | 0 Hypothetical protein (1)                                     |                                                                                                                                                                                                                                                                                         | Aspartic peptidase domain [IPRO21109] (1)                                                                                                                                                                                         | scaffold_8_mRNA_959.1          | -                           | -                               |
| GF0032792 | 1                           | 0                        | 0                            | 0 Hypothetical protein (1)                                     |                                                                                                                                                                                                                                                                                         |                                                                                                                                                                                                                                   | scaffold_8_mRNA_956.1          | -                           | -                               |
| GF0032791 | 1                           | 0                        | 0                            | 0 Hypothetical protein (1)                                     |                                                                                                                                                                                                                                                                                         |                                                                                                                                                                                                                                   | scaffold_8_mRNA_955.1          | -                           | -                               |
| GF0032790 | 1                           | 0                        | 0                            | 0 Hypothetical protein (1)                                     |                                                                                                                                                                                                                                                                                         |                                                                                                                                                                                                                                   | scaffold_8_mRNA_954.1          | -                           | -                               |
| GF0032789 | 1                           | 0                        | 0                            | 0 Monosaccharide transport protein (1)                         |                                                                                                                                                                                                                                                                                         |                                                                                                                                                                                                                                   | scaffold_8_mRNA_952.1          | -                           | -                               |
| GF0032788 | 1                           | 0                        | 0                            | 0 Hypothetical protein (1)                                     |                                                                                                                                                                                                                                                                                         | LOG family [IPRO31100] (1)                                                                                                                                                                                                        | scaffold_8_mRNA_951.1          | -                           | -                               |
| GF0032787 | 1                           | 0                        | 0                            | 0 Hypothetical protein (1)                                     |                                                                                                                                                                                                                                                                                         |                                                                                                                                                                                                                                   | scaffold_8_mRNA_949.1          | -                           | -                               |
| GF0032786 | 1                           | 0                        | 0                            | 0 BED zinc finger, HAT family dimerization domain (1)          | DNA binding [GO:0003677 molecular_function] (1); nucleic acid binding [GO:0003676 molecular_function] (1); protein dimerization activity [GO:0046983 molecular_function] (1)                                                                                                            | Ribonuclease H-like domain [IPRO12337] (1); hAT-like transposase, RNase-H fold [IPRO25525] (1); Zinc finger C2H2-type [IPRO13687] (1); Zinc finger, BED-type [IPRO03656] (1); HAT, C-terminal dimerisation domain [IPRO08906] (1) | scaffold_8_mRNA_942.1          | -                           | -                               |
| GF0032785 | 1                           | 0                        | 0                            | 0 Hypothetical protein (1)                                     |                                                                                                                                                                                                                                                                                         |                                                                                                                                                                                                                                   | scaffold_8_mRNA_940.1          | -                           | -                               |
| GF0032784 | 1                           | 0                        | 0                            | 0 Hypothetical protein (1)                                     |                                                                                                                                                                                                                                                                                         |                                                                                                                                                                                                                                   | scaffold_8_mRNA_939.1          | -                           | -                               |
| GF0032783 | 1                           | 0                        | 0                            | 0 Pentatricopeptide (PTP) repeat protein (1)                   |                                                                                                                                                                                                                                                                                         | Pentatricopeptide repeat [IPRO22885] (1)                                                                                                                                                                                          | scaffold_8_mRNA_938.1          | -                           | -                               |
| GF0032782 | 1                           | 0                        | 0                            | 0 Hypothetical protein (1)                                     |                                                                                                                                                                                                                                                                                         |                                                                                                                                                                                                                                   | scaffold_8_mRNA_933.1          | -                           | -                               |
| GF0032781 | 1                           | 0                        | 0                            | 0 Hypothetical protein (1)                                     |                                                                                                                                                                                                                                                                                         |                                                                                                                                                                                                                                   | scaffold_8_mRNA_932.1          | -                           | -                               |
| GF0032780 | 1                           | 0                        | 0                            | 0 Hypothetical protein (1)                                     | protein binding [GO:0005515 molecular_function] (1)                                                                                                                                                                                                                                     | SH3 domain [IPRO01452] (1); ArfGTPase homology (AH) domain/BAR domain [IPRO27287] (1)                                                                                                                                             | scaffold_8_mRNA_931.1          | -                           | -                               |
| GF0032779 | 1                           | 0                        | 0                            | 0 Hypothetical protein (1)                                     |                                                                                                                                                                                                                                                                                         |                                                                                                                                                                                                                                   | scaffold_8_mRNA_921.1          | -                           | -                               |
| GF0032778 | 1                           | 0                        | 0                            | 0 Hypothetical protein (1)                                     |                                                                                                                                                                                                                                                                                         | Viral movement protein [IPRO28919] (1)                                                                                                                                                                                            | scaffold_8_mRNA_920.1          | -                           | -                               |
| GF0032777 | 1                           | 0                        | 0                            | 0 Hypothetical protein (1)                                     |                                                                                                                                                                                                                                                                                         |                                                                                                                                                                                                                                   | scaffold_8_mRNA_919.1          | -                           | -                               |
| GF0032776 | 1                           | 0                        | 0                            | 0 Hypothetical protein (1)                                     | ligase activity, forming aminoacyl-tRNA and related compounds [GO:0016876 molecular_function] (1); tRNA aminoacylation [GO:0043059 biological_process] (1); ATP binding [GO:0005524 molecular_function] (1)                                                                             | Rossmann-like alpha/beta/alpha sandwich fold [IPRO14729] (1); Glutarylglutamyl-tRNA synthetase, class Ib, catalytic domain [IPRO20058] (1)                                                                                        | scaffold_8_mRNA_918.1          | -                           | -                               |
| GF0032775 | 1                           | 0                        | 0                            | 0 Hypothetical protein (1)                                     |                                                                                                                                                                                                                                                                                         |                                                                                                                                                                                                                                   | scaffold_8_mRNA_914.1          | -                           | -                               |
| GF0032774 | 1                           | 0                        | 0                            | 0 Hypothetical protein (1)                                     | protein dimerization activity [GO:0046983 molecular_function] (1); nucleic acid binding [GO:0003676 molecular_function] (1)                                                                                                                                                             | HAT, C-terminal dimerisation domain [IPRO08906] (1); Ribonuclease H-like domain [IPRO12337] (1)                                                                                                                                   | scaffold_8_mRNA_905.1          | -                           | -                               |
| GF0032773 | 1                           | 0                        | 0                            | 0 Hypothetical protein (1)                                     |                                                                                                                                                                                                                                                                                         |                                                                                                                                                                                                                                   | scaffold_8_mRNA_892.1          | -                           | -                               |
| GF0032772 | 1                           | 0                        | 0                            | 0 Monosaccharide transport protein (1)                         |                                                                                                                                                                                                                                                                                         |                                                                                                                                                                                                                                   | scaffold_8_mRNA_891.1          | -                           | -                               |
| GF0032771 | 1                           | 0                        | 0                            | 0 Hypothetical protein (1)                                     |                                                                                                                                                                                                                                                                                         |                                                                                                                                                                                                                                   | scaffold_8_mRNA_890.1          | -                           | -                               |
| GF0032770 | 1                           | 0                        | 0                            | 0 Hypothetical protein (1)                                     |                                                                                                                                                                                                                                                                                         |                                                                                                                                                                                                                                   | scaffold_8_mRNA_874.1          | -                           | -                               |
| GF0032769 | 1                           | 0                        | 0                            | 0 Hypothetical protein (1)                                     |                                                                                                                                                                                                                                                                                         |                                                                                                                                                                                                                                   | scaffold_8_mRNA_870.1          | -                           | -                               |
| GF0032768 | 1                           | 0                        | 0                            | 0 Hypothetical protein (1)                                     |                                                                                                                                                                                                                                                                                         | Retron transposon gag domain [IPRO05162] (1)                                                                                                                                                                                      | scaffold_8_mRNA_867.1          | -                           | -                               |
| GF0032767 | 1                           | 0                        | 0                            | 0 Putative mitochondrial chaperone bcs1 (1)                    | ATP binding [GO:0005524 molecular_function] (1)                                                                                                                                                                                                                                         | (1); P-loop containing nucleoside triphosphatase hydrolase [IPRO27417] (1); AAA-type ATPase, N-terminal domain [IPRO25753] (1); ATPase, AAA-type, conserved site [IPRO03960] (1)                                                  | scaffold_8_mRNA_849.1          | -                           | -                               |
| GF0032766 | 1                           | 0                        | 0                            | 0 Hypothetical protein (1)                                     |                                                                                                                                                                                                                                                                                         | AAA-type ATPase, N-terminal domain [IPRO25753] (1)                                                                                                                                                                                | scaffold_8_mRNA_844.1          | -                           | -                               |
| GF0032765 | 1                           | 0                        | 0                            | 0 Hypothetical protein (1)                                     | nucleic acid binding [GO:0003676 molecular_function] (1); zinc ion binding [GO:0008270 molecular_function] (1)                                                                                                                                                                          | Domain of unknown function DUF4283 [IPRO25558] (1); Reverse transcriptase zinc-binding domain [IPRO25960] (1); Endonuclease/ctonuclease/phosphatase [IPRO05135] (1); Zinc finger, CCHC-type [IPRO01878] (1)                       | scaffold_8_mRNA_837.1          | -                           | -                               |
| GF0032764 | 1                           | 0                        | 0                            | 0 Pollen-specific protein SF3 (1)                              | zinc ion binding [GO:0008270 molecular_function] (1)                                                                                                                                                                                                                                    | Zinc finger, LIM-type [IPRO01781] (1)                                                                                                                                                                                             | scaffold_8_mRNA_828.1          | -                           | -                               |
| GF0032763 | 1                           | 0                        | 0                            | 0 Hypothetical protein (1)                                     |                                                                                                                                                                                                                                                                                         |                                                                                                                                                                                                                                   | scaffold_8_mRNA_826.1          | -                           | -                               |
| GF0032762 | 1                           | 0                        | 0                            | 0 Cytokinin riboside 5'-monophosphate phosphoribohydrolase (1) |                                                                                                                                                                                                                                                                                         | LOG family [IPRO31100] (1)                                                                                                                                                                                                        | scaffold_8_mRNA_825.1          | -                           | -                               |
| GF0032761 | 1                           | 0                        | 0                            | 0 Hypothetical protein (1)                                     |                                                                                                                                                                                                                                                                                         |                                                                                                                                                                                                                                   | scaffold_8_mRNA_824.1          | -                           | -                               |
| GF0032760 | 1                           | 0                        | 0                            | 0 Hypothetical protein (1)                                     | nucleic acid binding [GO:0003676 molecular_function] (1); RNA-DNA hybrid ribonuclease activity [GO:0044523 molecular_function] (1); DNA integration [GO:0013074 biological_process] (1)                                                                                                 | Integrase, catalytic core [IPRO01584] (1); Ribonuclease H-like domain [IPRO12337] (1); Ribonuclease H domain scaffold_8_mRNA_822.1 [IPRO02156] (1); Retrotransposon gag domain [IPRO05162] (1)                                    | scaffold_8_mRNA_822.1          | -                           | -                               |
| GF0032759 | 1                           | 0                        | 0                            | 0 Phenyloxyman benzyl ether reductase (1)                      |                                                                                                                                                                                                                                                                                         | NAD(P)-binding domain [IPRO16040] (1); NmrA-like domain [IPRO08030] (1)                                                                                                                                                           | scaffold_8_mRNA_821.1          | -                           | -                               |
| GF0032758 | 1                           | 0                        | 0                            | 0 Phenyloxyman benzyl ether reductase (1)                      |                                                                                                                                                                                                                                                                                         | NAD(P)-binding domain [IPRO16040] (1); NmrA-like domain [IPRO08030] (1)                                                                                                                                                           | scaffold_8_mRNA_820.1          | -                           | -                               |
| GF0032757 | 1                           | 0                        | 0                            | 0 Phenyloxyman benzyl ether reductase (1)                      |                                                                                                                                                                                                                                                                                         | NAD(P)-binding domain [IPRO16040] (1); NmrA-like domain [IPRO08030] (1)                                                                                                                                                           | scaffold_8_mRNA_819.1          | -                           | -                               |
| GF0032756 | 1                           | 0                        | 0                            | 0 Phenyloxyman benzyl ether reductase (1)                      |                                                                                                                                                                                                                                                                                         | NmrA-like domain [IPRO08030] (1); NAD(P)-binding domain [IPRO16040] (1)                                                                                                                                                           | scaffold_8_mRNA_815.1          | -                           | -                               |
| GF0032755 | 1                           | 0                        | 0                            | 0 UDP-glycosyltransferase 85A7 (1)                             | metabolic process [GO:0008152 biological_process] (1); transferase activity, transferring hexosyl groups [GO:0016758 molecular_function] (1)                                                                                                                                            | UDP-glucuronosyl/UDP-glucosyltransferase [IPRO02213] (1)                                                                                                                                                                          | scaffold_8_mRNA_811.1          | -                           | -                               |
| GF0032754 | 1                           | 0                        | 0                            | 0 Hypothetical protein (1)                                     |                                                                                                                                                                                                                                                                                         |                                                                                                                                                                                                                                   | scaffold_8_mRNA_810.1          | -                           | -                               |
| GF0032753 | 1                           | 0                        | 0                            | 0 Hypothetical protein (1)                                     |                                                                                                                                                                                                                                                                                         |                                                                                                                                                                                                                                   | scaffold_8_mRNA_806.1          | -                           | -                               |
| GF0032752 | 1                           | 0                        | 0                            | 0 Hypothetical protein (1)                                     |                                                                                                                                                                                                                                                                                         |                                                                                                                                                                                                                                   | scaffold_8_mRNA_805.1          | -                           | -                               |
| GF0032751 | 1                           | 0                        | 0                            | 0 Hypothetical protein (1)                                     |                                                                                                                                                                                                                                                                                         |                                                                                                                                                                                                                                   | scaffold_8_mRNA_804.1          | -                           | -                               |
| GF0032750 | 1                           | 0                        | 0                            | 0 Cytokinin riboside 5'-monophosphate phosphoribohydrolase (1) |                                                                                                                                                                                                                                                                                         |                                                                                                                                                                                                                                   | scaffold_8_mRNA_803.1          | -                           | -                               |
| GF0032749 | 1                           | 0                        | 0                            | 0 Probable pectinesterase 67 (1)                               | pectinesterase activity [GO:0003059 molecular_function] (1); cell wall modification [GO:0042545 biological_process] (1); cell wall [GO:0005618 cellular_component] (1)                                                                                                                  | Pectinesterase, Asp active site [IPRO31311] (1); Pectinesterase, catalytic [IPRO0070] (1); Pectin lyase fold [IPRO12334] (1); Pectin lyase fold/virulence factor [IPRO11050] (1)                                                  | scaffold_8_mRNA_800.1          | -                           | -                               |
| GF0032748 | 1                           | 0                        | 0                            | 0 Hypothetical protein (1)                                     |                                                                                                                                                                                                                                                                                         |                                                                                                                                                                                                                                   | scaffold_8_mRNA_8.1            | -                           | -                               |
| GF0032747 | 1                           | 0                        | 0                            | 0 Hypothetical protein (1)                                     |                                                                                                                                                                                                                                                                                         |                                                                                                                                                                                                                                   | scaffold_8_mRNA_799.1          | -                           | -                               |
| GF0032746 | 1                           | 0                        | 0                            | 0 Hypothetical protein (1)                                     |                                                                                                                                                                                                                                                                                         |                                                                                                                                                                                                                                   | scaffold_8_mRNA_794.1          | -                           | -                               |
| GF0032745 | 1                           | 0                        | 0                            | 0 Glutaminase (1)                                              |                                                                                                                                                                                                                                                                                         |                                                                                                                                                                                                                                   | scaffold_8_mRNA_793.1          | -                           | -                               |
| GF0032744 | 1                           | 0                        | 0                            | 0 Hypothetical protein (1)                                     | proteolysis [GO:0006508 biological_process] (1); cysteine-type peptidase activity [GO:0008234 molecular_function] (1)                                                                                                                                                                   | Upl1 protease family, C-terminal catalytic domain [IPRO03653] (1)                                                                                                                                                                 | scaffold_8_mRNA_789.1          | -                           | -                               |
| GF0032743 | 1                           | 0                        | 0                            | 0 Mutator-like transposase (1)                                 | zinc ion binding [GO:0008270 molecular_function] (1)                                                                                                                                                                                                                                    | Zinc finger, SWIM-type [IPRO07527] (1); Zinc finger, PMLZ-type [IPRO06564] (1); MULE transposase domain [IPRO18289] (1); Transposase, MuDR, plant [IPRO04332] (1)                                                                 | scaffold_8_mRNA_778.1          | -                           | -                               |
| GF0032742 | 1                           | 0                        | 0                            | 0 BURP domain-containing protein (1)                           |                                                                                                                                                                                                                                                                                         | BURP domain [IPRO04873] (1)                                                                                                                                                                                                       | scaffold_8_mRNA_755.1          | -                           | -                               |
| GF0032741 | 1                           | 0                        | 0                            | 0 Hypothetical protein (1)                                     |                                                                                                                                                                                                                                                                                         |                                                                                                                                                                                                                                   | scaffold_8_mRNA_753.1          | -                           | -                               |
| GF0032740 | 1                           | 0                        | 0                            | 0 Non-LTR retroelement reverse transcriptase-like (1)          |                                                                                                                                                                                                                                                                                         | Reverse transcriptase zinc-binding domain [IPRO26960] (1); Domain of unknown function DUF4283 [IPRO25558] (1)                                                                                                                     | scaffold_8_mRNA_749.1          | -                           | -                               |
| GF0032739 | 1                           | 0                        | 0                            | 0 Yellow stripe 1A transporter (1)                             | transmembrane transport [GO:0055085 biological_process] (1)                                                                                                                                                                                                                             | Oligopeptide transporter, OPT superfamily [IPRO04813] (1)                                                                                                                                                                         | scaffold_8_mRNA_748.1          | -                           | -                               |
| GF0032738 | 1                           | 0                        | 0                            | 0 Endochitinase (1)                                            | chitinase activity [GO:0004568 molecular_function] (1); chitin catabolic process [GO:0006032 biological_process] (1); cell wall macromolecule catabolic process [GO:0016998 biological_process] (1)                                                                                     | Glycoside hydrolase, family 19, catalytic [IPRO00726] (1); Lysozyme-like domain [IPRO23346] (1)                                                                                                                                   | scaffold_8_mRNA_74.1           | -                           | -                               |
| GF0032737 | 1                           | 0                        | 0                            | 0 Hypothetical protein (1)                                     |                                                                                                                                                                                                                                                                                         |                                                                                                                                                                                                                                   | scaffold_8_mRNA_739.1          | -                           | -                               |
| GF0032736 | 1                           | 0                        | 0                            | 0 Hypothetical protein (1)                                     | protein serine/threonine kinase activity [GO:0004674 molecular_function] (1); nuclear-transcribed mRNA catabolic process, nonsense-mediated decay [GO:0000184 biological_process] (1); phosphorylation [GO:0016310 biological_process] (1); binding [GO:0005488 molecular_function] (1) | Armadillo-like helical [IPRO11989] (1); Serine/threonine-protein kinase SMI1 [IPRO31559] (1); Armadillo-type fold [IPRO16024] (1)                                                                                                 | scaffold_8_mRNA_735.1          | -                           | -                               |
| GF0032735 | 1                           | 0                        | 0                            | 0 Monosaccharide transport protein (1)                         |                                                                                                                                                                                                                                                                                         |                                                                                                                                                                                                                                   | scaffold_8_mRNA_732.1          | -                           | -                               |
| GF0032734 | 1                           | 0                        | 0                            | 0 Hypothetical protein (1)                                     |                                                                                                                                                                                                                                                                                         |                                                                                                                                                                                                                                   | scaffold_8_mRNA_713.1          | -                           | -                               |
| GF0032733 | 1                           | 0                        | 0                            | 0 Hypothetical protein (1)                                     |                                                                                                                                                                                                                                                                                         |                                                                                                                                                                                                                                   | scaffold_8_mRNA_712.1          | -                           | -                               |
| GF0032732 | 1                           | 0                        | 0                            | 0 Hypothetical protein (1)                                     |                                                                                                                                                                                                                                                                                         |                                                                                                                                                                                                                                   | scaffold_8_mRNA_702.1          | -                           | -                               |

| ID        | Num. in <i>C. clementinae</i> | Num. in <i>C. uchiha</i> | Num. in <i>P. trifoliata</i> | Note                                                                   | GO                                                                                                                                                                                                                                                                                                                                                                   | InterPro                                                                                                                                                                                                                                  | Members in <i>C. clementinae</i> | Members in <i>C. uchiha</i> | Members in <i>P. trifoliata</i> |
|-----------|-------------------------------|--------------------------|------------------------------|------------------------------------------------------------------------|----------------------------------------------------------------------------------------------------------------------------------------------------------------------------------------------------------------------------------------------------------------------------------------------------------------------------------------------------------------------|-------------------------------------------------------------------------------------------------------------------------------------------------------------------------------------------------------------------------------------------|----------------------------------|-----------------------------|---------------------------------|
| GF0032731 | 1                             | 0                        | 0                            | 0 4-hydroxy-3-methylbut-2-enyl diphosphate reductase (1)               | dimethylallyl diphosphate biosynthetic process [GO:0050992] biological_process (1); isopentenyl diphosphate biosynthetic process, methylerythritol 4-phosphate pathway [GO:0015288 biological_process] (1); metal ion binding [GO:004872 molecular_function] (1); 4-hydroxy-3-methylbut-2-en-1-yl diphosphate reductase activity [GO:0051745 molecular_function] (1) | 4-hydroxy-3-methylbut-2-enyl diphosphate reductase [IPRO03451] (1)                                                                                                                                                                        | scaffold_8_mRNA_701.1            | -                           | -                               |
| GF0032730 | 1                             | 0                        | 0                            | 0 Hypothetical protein (1)                                             |                                                                                                                                                                                                                                                                                                                                                                      | Zinc finger, SWIM-type [IPRO07527] (1); Transposase, MuDR, plant [IPRO04332] (1); MULE transposase domain [IPRO18289] (1); Zinc finger, PMZ-type [IPRO06564] (1)                                                                          | scaffold_8_mRNA_697.1            | -                           | -                               |
| GF0032729 | 1                             | 0                        | 0                            | 0 Mutator-like transposase (1)                                         | zinc ion binding [GO:0008270 molecular_function] (1)                                                                                                                                                                                                                                                                                                                 |                                                                                                                                                                                                                                           | scaffold_8_mRNA_685.1            | -                           | -                               |
| GF0032728 | 1                             | 0                        | 0                            | 0 Hypothetical protein (1)                                             | cysteine-type peptidase activity [GO:0008234 molecular_function] (1); proteolysis [GO:0006508 biological_process] (1)                                                                                                                                                                                                                                                | Upl1 protease family, C-terminal catalytic domain [IPRO03653] (1); Domain of unknown function DUF1985 [IPRO15410] (1)                                                                                                                     | scaffold_8_mRNA_684.1            | -                           | -                               |
| GF0032727 | 1                             | 0                        | 0                            | 0 Hypothetical protein (1)                                             |                                                                                                                                                                                                                                                                                                                                                                      |                                                                                                                                                                                                                                           | scaffold_8_mRNA_683.1            | -                           | -                               |
| GF0032726 | 1                             | 0                        | 0                            | 0 Retrotransposon protein, putative, Ty1-copia subclass (1)            |                                                                                                                                                                                                                                                                                                                                                                      |                                                                                                                                                                                                                                           | scaffold_8_mRNA_678.1            | -                           | -                               |
| GF0032725 | 1                             | 0                        | 0                            | 0 Hypothetical protein (1)                                             |                                                                                                                                                                                                                                                                                                                                                                      |                                                                                                                                                                                                                                           | scaffold_8_mRNA_676.1            | -                           | -                               |
| GF0032724 | 1                             | 0                        | 0                            | 0 BIP isoform A family protein (1)                                     |                                                                                                                                                                                                                                                                                                                                                                      | Heat shock protein 70kD, peptide-binding domain [IPRO29047] (1); Heat shock protein 70 family [IPRO13126] (1); Heat shock protein 70, conserved site [IPRO18181] (1); Heat shock protein 70kD, C-terminal domain [IPRO29048] (1)          | scaffold_8_mRNA_675.1            | -                           | -                               |
| GF0032723 | 1                             | 0                        | 0                            | 0 Hypothetical protein (1)                                             |                                                                                                                                                                                                                                                                                                                                                                      |                                                                                                                                                                                                                                           | scaffold_8_mRNA_667.1            | -                           | -                               |
| GF0032722 | 1                             | 0                        | 0                            | 0 Hypothetical protein (1)                                             |                                                                                                                                                                                                                                                                                                                                                                      | Domain of unknown function DUF1985 [IPRO15410] (1)                                                                                                                                                                                        | scaffold_8_mRNA_665.1            | -                           | -                               |
| GF0032721 | 1                             | 0                        | 0                            | 0 Hypothetical protein (1)                                             |                                                                                                                                                                                                                                                                                                                                                                      |                                                                                                                                                                                                                                           | scaffold_8_mRNA_647.1            | -                           | -                               |
| GF0032720 | 1                             | 0                        | 0                            | 0 B3 domain-containing transcription factor VRN1-like protein (1)      | DNA binding [GO:0003677 molecular_function] (1)                                                                                                                                                                                                                                                                                                                      | B3 DNA binding domain [IPRO03340] (1); DNA-binding pseudobarrel domain [IPRO15390] (1)                                                                                                                                                    | scaffold_8_mRNA_634.1            | -                           | -                               |
| GF0032719 | 1                             | 0                        | 0                            | 0 Hypothetical protein (1)                                             | ADP binding [GO:0043531 molecular_function] (1)                                                                                                                                                                                                                                                                                                                      | P-loop containing nucleoside triphosphate hydrolase [IPRO027417] (1); NB-ARC [IPRO02182] (1)                                                                                                                                              | scaffold_8_mRNA_631.1            | -                           | -                               |
| GF0032718 | 1                             | 0                        | 0                            | 0 Hypothetical protein (1)                                             |                                                                                                                                                                                                                                                                                                                                                                      |                                                                                                                                                                                                                                           | scaffold_8_mRNA_626.1            | -                           | -                               |
| GF0032717 | 1                             | 0                        | 0                            | 0 Hypothetical protein (1)                                             |                                                                                                                                                                                                                                                                                                                                                                      |                                                                                                                                                                                                                                           | scaffold_8_mRNA_621.1            | -                           | -                               |
| GF0032716 | 1                             | 0                        | 0                            | 0 Hypothetical protein (1)                                             |                                                                                                                                                                                                                                                                                                                                                                      |                                                                                                                                                                                                                                           | scaffold_8_mRNA_617.1            | -                           | -                               |
| GF0032715 | 1                             | 0                        | 0                            | 0 Hypothetical protein (1)                                             |                                                                                                                                                                                                                                                                                                                                                                      |                                                                                                                                                                                                                                           | scaffold_8_mRNA_615.1            | -                           | -                               |
| GF0032714 | 1                             | 0                        | 0                            | 0 Hypothetical protein (1)                                             |                                                                                                                                                                                                                                                                                                                                                                      |                                                                                                                                                                                                                                           | scaffold_8_mRNA_607.1            | -                           | -                               |
| GF0032713 | 1                             | 0                        | 0                            | 0 Hypothetical protein (1)                                             |                                                                                                                                                                                                                                                                                                                                                                      |                                                                                                                                                                                                                                           | scaffold_8_mRNA_596.1            | -                           | -                               |
| GF0032712 | 1                             | 0                        | 0                            | 0 Hypothetical protein (1)                                             | nucleic acid binding [GO:0003676 molecular_function] (1)                                                                                                                                                                                                                                                                                                             | Ribonuclease H-like domain [IPRO12337] (1)                                                                                                                                                                                                | scaffold_8_mRNA_595.1            | -                           | -                               |
| GF0032711 | 1                             | 0                        | 0                            | 0 Hypothetical protein (1)                                             |                                                                                                                                                                                                                                                                                                                                                                      |                                                                                                                                                                                                                                           | scaffold_8_mRNA_591.1            | -                           | -                               |
| GF0032710 | 1                             | 0                        | 0                            | 0 Disease resistance family protein/ LRR family protein, putative (1)  | protein binding [GO:0005515 molecular_function] (1)                                                                                                                                                                                                                                                                                                                  | Leucine-rich repeat domain, L domain-like [IPRO32075] (1); Leucine-rich repeat, typical subtype [IPRO03591] (1); Leucine-rich repeat [IPRO01611] (1); Leucine-rich repeat-containing N-terminal, plant-type [IPRO13210] (1)               | scaffold_8_mRNA_589.1            | -                           | -                               |
| GF0032709 | 1                             | 0                        | 0                            | 0 Hypothetical protein (1)                                             |                                                                                                                                                                                                                                                                                                                                                                      |                                                                                                                                                                                                                                           | scaffold_8_mRNA_586.1            | -                           | -                               |
| GF0032708 | 1                             | 0                        | 0                            | 0 Hypothetical protein (1)                                             |                                                                                                                                                                                                                                                                                                                                                                      |                                                                                                                                                                                                                                           | scaffold_8_mRNA_581.1            | -                           | -                               |
| GF0032707 | 1                             | 0                        | 0                            | 0 Hypothetical protein (1)                                             |                                                                                                                                                                                                                                                                                                                                                                      |                                                                                                                                                                                                                                           | scaffold_8_mRNA_572.1            | -                           | -                               |
| GF0032706 | 1                             | 0                        | 0                            | 0 Hypothetical protein (1)                                             | proteolysis [GO:0006508 biological_process] (1); serine-type carboxypeptidase activity [GO:0004185 molecular_function] (1)                                                                                                                                                                                                                                           | Alpha/Beta hydrolase fold [IPRO29058] (1); Peptidase S10, serine carboxypeptidase [IPRO01563] (1); Serine carboxypeptidase, histidine active site [IPRO33124] (1)                                                                         | scaffold_8_mRNA_566.1            | -                           | -                               |
| GF0032705 | 1                             | 0                        | 0                            | 0 Putative carboxylesterase 2 (1)                                      | meiotic process [GO:0000122 biological_process] (1); hydrolase activity [GO:0016787 molecular_function] (1)                                                                                                                                                                                                                                                          | Alpha/beta hydrolase fold-3 [IPRO13094] (1); Alpha/Beta hydrolase fold [IPRO29058] (1)                                                                                                                                                    | scaffold_8_mRNA_560.1            | -                           | -                               |
| GF0032704 | 1                             | 0                        | 0                            | 0 CXE carboxylesterase (1)                                             | meiotic process [GO:0000122 biological_process] (1); hydrolase activity [GO:0016787 molecular_function] (1)                                                                                                                                                                                                                                                          | Alpha/Beta hydrolase fold [IPRO29058] (1); Alpha/beta hydrolase fold-3 [IPRO13094] (1)                                                                                                                                                    | scaffold_8_mRNA_557.1            | -                           | -                               |
| GF0032703 | 1                             | 0                        | 0                            | 0 60s ribosomal protein (1)                                            | ribosome [GO:0005840 cellular_component] (1); metabolic process [GO:0008152 biological_process] (1); intracellular translation [GO:0005622 cellular_component] (1); translation [GO:0006412 biological_process] (1); structural constituent of ribosome [GO:0003735 molecular_function] (1); hydrolase activity [GO:0016787 molecular_function] (1)                  | Ribosomal protein L2 domain 2 [IPRO14722] (1); Alpha/Beta hydrolase fold [IPRO29058] (1); Alpha/beta hydrolase fold-3 [IPRO13094] (1); Translation protein SH3-like domain [IPRO08911] (1); Ribosomal protein L14e domain [IPRO02784] (1) | scaffold_8_mRNA_552.1            | -                           | -                               |
| GF0032702 | 1                             | 0                        | 0                            | 0 Hypothetical protein (1)                                             | hydrolase activity [GO:0016787 molecular_function] (1); metabolic process [GO:0008152 biological_process] (1)                                                                                                                                                                                                                                                        | Alpha/beta hydrolase fold-3 [IPRO13094] (1); Alpha/Beta hydrolase fold [IPRO29058] (1)                                                                                                                                                    | scaffold_8_mRNA_549.1            | -                           | -                               |
| GF0032701 | 1                             | 0                        | 0                            | 0 Putative carboxylesterase 2 (1)                                      | meiotic process [GO:0000122 biological_process] (1); hydrolase activity [GO:0016787 molecular_function] (1)                                                                                                                                                                                                                                                          | Alpha/beta hydrolase fold-3 [IPRO13094] (1); Alpha/Beta hydrolase fold [IPRO29058] (1)                                                                                                                                                    | scaffold_8_mRNA_548.1            | -                           | -                               |
| GF0032700 | 1                             | 0                        | 0                            | 0 Hypothetical protein (1)                                             | DNA integration [GO:0015074 biological_process] (1); nucleic acid binding [GO:0003676 molecular_function] (1)                                                                                                                                                                                                                                                        | Integrase, catalytic core [IPRO01584] (1); Ribonuclease H-like domain [IPRO12337] (1); Gag-pse-integrase domain [IPRO25724] (1)                                                                                                           | scaffold_8_mRNA_540.1            | -                           | -                               |
| GF0032699 | 1                             | 0                        | 0                            | 0 Hypothetical protein (1)                                             |                                                                                                                                                                                                                                                                                                                                                                      |                                                                                                                                                                                                                                           | scaffold_8_mRNA_538.1            | -                           | -                               |
| GF0032698 | 1                             | 0                        | 0                            | 0 Hypothetical protein (1)                                             | catalytic activity [GO:0003824 molecular_function] (1); metal ion binding [GO:0046872 molecular_function] (1)                                                                                                                                                                                                                                                        | Peptidase M16, N-terminal [IPRO11765] (1); Peptidase M16, C-terminal [IPRO07863] (1); Metalloenzyme, LuxS/M16 peptidase-like [IPRO11249] (1)                                                                                              | scaffold_8_mRNA_534.1            | -                           | -                               |
| GF0032697 | 1                             | 0                        | 0                            | 0 CXE carboxylesterase (1)                                             | hydrolase activity [GO:0016787 molecular_function] (1); metabolic process [GO:0008152 biological_process] (1)                                                                                                                                                                                                                                                        | Alpha/beta hydrolase fold-3 [IPRO13094] (1); Alpha/Beta hydrolase fold [IPRO29058] (1)                                                                                                                                                    | scaffold_8_mRNA_532.1            | -                           | -                               |
| GF0032696 | 1                             | 0                        | 0                            | 0 Hypothetical protein (1)                                             |                                                                                                                                                                                                                                                                                                                                                                      | Retrotransposon gag domain [IPRO05162] (1); Reverse transcriptase domain [IPRO00477] (1)                                                                                                                                                  | scaffold_8_mRNA_531.1            | -                           | -                               |
| GF0032695 | 1                             | 0                        | 0                            | 0 Hypothetical protein (1)                                             | DNA integration [GO:0015074 biological_process] (1); nucleic acid binding [GO:0003676 molecular_function] (1)                                                                                                                                                                                                                                                        | Ribonuclease H-like domain [IPRO12337] (1); Integrase, catalytic core [IPRO01584] (1)                                                                                                                                                     | scaffold_8_mRNA_528.1            | -                           | -                               |
| GF0032694 | 1                             | 0                        | 0                            | 0 Hypothetical protein (1)                                             |                                                                                                                                                                                                                                                                                                                                                                      | Fumarylacetylase, N-terminal [IPRO24083] (1)                                                                                                                                                                                              | scaffold_8_mRNA_527.1            | -                           | -                               |
| GF0032693 | 1                             | 0                        | 0                            | 0 Hypothetical protein (1)                                             | hydrolase activity [GO:0016787 molecular_function] (1); metabolic process [GO:0008152 biological_process] (1)                                                                                                                                                                                                                                                        | Alpha/Beta hydrolase fold [IPRO29058] (1); Alpha/beta hydrolase fold-3 [IPRO13094] (1)                                                                                                                                                    | scaffold_8_mRNA_524.1            | -                           | -                               |
| GF0032692 | 1                             | 0                        | 0                            | 0 Hypothetical protein (1)                                             | catalytic activity [GO:0003824 molecular_function] (1)                                                                                                                                                                                                                                                                                                               | Gag-polypeptide of LTR copia-type [IPRO29472] (1); Aldolase-type TIM barrel [IPRO13785] (1)                                                                                                                                               | scaffold_8_mRNA_522.1            | -                           | -                               |
| GF0032691 | 1                             | 0                        | 0                            | 0 CXE carboxylesterase (1)                                             | meiotic process [GO:0000122 biological_process] (1); hydrolase activity [GO:0016787 molecular_function] (1)                                                                                                                                                                                                                                                          | Alpha/Beta hydrolase fold [IPRO29058] (1); Lipase, GDXX, putative serine active site [IPRO33140] (1); Alpha/beta hydrolase fold-3 [IPRO13094] (1)                                                                                         | scaffold_8_mRNA_520.1            | -                           | -                               |
| GF0032690 | 1                             | 0                        | 0                            | 0 Hypothetical protein (1)                                             |                                                                                                                                                                                                                                                                                                                                                                      | Short-chain dehydrogenase/reductase SDR [IPRO02347] (1); NAD(P)-binding domain [IPRO16040] (1)                                                                                                                                            | scaffold_8_mRNA_510.1            | -                           | -                               |
| GF0032689 | 1                             | 0                        | 0                            | 0 Hypothetical protein (1)                                             |                                                                                                                                                                                                                                                                                                                                                                      |                                                                                                                                                                                                                                           | scaffold_8_mRNA_492.1            | -                           | -                               |
| GF0032688 | 1                             | 0                        | 0                            | 0 Monosaccharide transport protein (1)                                 |                                                                                                                                                                                                                                                                                                                                                                      |                                                                                                                                                                                                                                           | scaffold_8_mRNA_490.1            | -                           | -                               |
| GF0032687 | 1                             | 0                        | 0                            | 0 Hypothetical protein (1)                                             |                                                                                                                                                                                                                                                                                                                                                                      | Retrotransposon gag domain [IPRO05162] (1)                                                                                                                                                                                                | scaffold_8_mRNA_478.1            | -                           | -                               |
| GF0032686 | 1                             | 0                        | 0                            | 0 Vacuolar ATPase assembly integral membrane protein VMA21 homolog (1) | vacuolar proton-transporting V-type ATPase complex assembly [GO:0070072 biological_process] (1)                                                                                                                                                                                                                                                                      | Vacuolar ATPase assembly integral membrane protein Vma21 [IPRO19013] (1)                                                                                                                                                                  | scaffold_8_mRNA_474.1            | -                           | -                               |
| GF0032685 | 1                             | 0                        | 0                            | 0 Hypothetical protein (1)                                             | nucleic acid binding [GO:0003676 molecular_function] (1)                                                                                                                                                                                                                                                                                                             | Ribonuclease H-like domain [IPRO12337] (1)                                                                                                                                                                                                | scaffold_8_mRNA_473.1            | -                           | -                               |
| GF0032684 | 1                             | 0                        | 0                            | 0 Hypothetical protein (1)                                             | protein dimerization activity [GO:0046983 molecular_function] (1)                                                                                                                                                                                                                                                                                                    | Myc-type, basic helix-loop-helix (bHLH) domain [IPRO11598] (1)                                                                                                                                                                            | scaffold_8_mRNA_465.1            | -                           | -                               |
| GF0032683 | 1                             | 0                        | 0                            | 0 Hypothetical protein (1)                                             |                                                                                                                                                                                                                                                                                                                                                                      | Domain of unknown function DUF4219 [IPRO25314] (1)                                                                                                                                                                                        | scaffold_8_mRNA_452.1            | -                           | -                               |
| GF0032682 | 1                             | 0                        | 0                            | 0 Patched family protein (1)                                           | integral component of membrane [GO:0016021 cellular_component] (1); lipid transporter activity [GO:0005319 molecular_function] (1)                                                                                                                                                                                                                                   | Nicamann-Pick C type protein [IPRO04785] (1); Sterol-sensing domain [IPRO0751] (1); Protein patched/dispatched [IPRO03392] (1); Nicamann-Pick Ct, N-terminal [IPRO32190] (1)                                                              | scaffold_8_mRNA_451.1            | -                           | -                               |



| ID        | Num. in <i>C. clementiae</i> | Num. in <i>C. uchiha</i> | Num. in <i>P. trifoliate</i> | Note                                                                | GO                                                                                                                                                                                                                                                                                                                                                                                                         | InterPro                                                                                                                                                                                                                              | Members in <i>C. clementiae</i> | Members in <i>C. uchiha</i> | Members in <i>P. trifoliate</i> |
|-----------|------------------------------|--------------------------|------------------------------|---------------------------------------------------------------------|------------------------------------------------------------------------------------------------------------------------------------------------------------------------------------------------------------------------------------------------------------------------------------------------------------------------------------------------------------------------------------------------------------|---------------------------------------------------------------------------------------------------------------------------------------------------------------------------------------------------------------------------------------|---------------------------------|-----------------------------|---------------------------------|
| GF0032681 | 1                            | 0                        | 0                            | UDP-glucose flavinoid 3-GO-glycosyltransferase 7 (1)                | metabolic process [GO:0008152 biological_process] (1); transferase activity, transferring hexosyl groups [GO:0016758 molecular_function] (1)                                                                                                                                                                                                                                                               | UDP-glucuronosyl/UDP-glucosyltransferase [IPRO02213] (1)                                                                                                                                                                              | scaffold_8_mRNA_449.1           | -                           | -                               |
| GF0032680 | 1                            | 0                        | 0                            | UDP-glucosyltransferase 73B2 (1)                                    | metabolic process [GO:0008152 biological_process] (1); transferase activity, transferring hexosyl groups [GO:0016758 molecular_function] (1)                                                                                                                                                                                                                                                               | UDP-glucuronosyl/UDP-glucosyltransferase [IPRO02213] (1)                                                                                                                                                                              | scaffold_8_mRNA_448.1           | -                           | -                               |
| GF0032679 | 1                            | 0                        | 0                            | 0 Hypothetical protein (1)                                          |                                                                                                                                                                                                                                                                                                                                                                                                            |                                                                                                                                                                                                                                       | scaffold_8_mRNA_44.1            | -                           | -                               |
| GF0032678 | 1                            | 0                        | 0                            | 0 Hypothetical protein (1)                                          | zinc ion binding [GO:0008270 molecular_function] (1); proteolysis [GO:0006508 biological_process] (1); cysteine-type peptidase activity [GO:0008234 molecular_function] (1)                                                                                                                                                                                                                                | Zinc finger, PMZ-type [IPRO06564] (1); Zinc finger, SWIM-type [IPRO07527] (1)                                                                                                                                                         | scaffold_8_mRNA_433.1           | -                           | -                               |
| GF0032677 | 1                            | 0                        | 0                            | 0 Hypothetical protein (1)                                          |                                                                                                                                                                                                                                                                                                                                                                                                            | Upl1 protease family, C-terminal catalytic domain [IPRO03653] (1)                                                                                                                                                                     | scaffold_8_mRNA_432.1           | -                           | -                               |
| GF0032676 | 1                            | 0                        | 0                            | 0 Pentatricopeptide repeat-containing family protein (1)            | protein binding [GO:0005515 molecular_function] (1)                                                                                                                                                                                                                                                                                                                                                        | Pentatricopeptide repeat [IPRO02885] (1); Tetratricopeptide-like helical domain [IPRO11990] (1)                                                                                                                                       | scaffold_8_mRNA_43.1            | -                           | -                               |
| GF0032675 | 1                            | 0                        | 0                            | 0 Hypothetical protein (1)                                          |                                                                                                                                                                                                                                                                                                                                                                                                            | Retrontransposon gag domain [IPRO05162] (1)                                                                                                                                                                                           | scaffold_8_mRNA_429.1           | -                           | -                               |
| GF0032674 | 1                            | 0                        | 0                            | 0 Hypothetical protein (1)                                          |                                                                                                                                                                                                                                                                                                                                                                                                            | Protein kinase-like domain [IPRO11009] (1); Aminoglycoside phosphotransferase [IPRO02575] (1)                                                                                                                                         | scaffold_8_mRNA_413.1           | -                           | -                               |
| GF0032673 | 1                            | 0                        | 0                            | 0 Hypothetical protein (1)                                          |                                                                                                                                                                                                                                                                                                                                                                                                            | Retrontransposon gag domain [IPRO11009] (1); Aminoglycoside phosphotransferase [IPRO02575] (1)                                                                                                                                        | scaffold_8_mRNA_411.1           | -                           | -                               |
| GF0032672 | 1                            | 0                        | 0                            | 0 Hypothetical protein (1)                                          |                                                                                                                                                                                                                                                                                                                                                                                                            | Protein kinase-like domain [IPRO11009] (1); Aminoglycoside phosphotransferase [IPRO02575] (1)                                                                                                                                         | scaffold_8_mRNA_401.1           | -                           | -                               |
| GF0032671 | 1                            | 0                        | 0                            | 0 Hypothetical protein (1)                                          |                                                                                                                                                                                                                                                                                                                                                                                                            | Cytokinin riboside 5'-monophosphate phosphoribohydrolase LOG [IPRO05269] (1); LOG family [IPRO03100] (1)                                                                                                                              | scaffold_8_mRNA_38.1            | -                           | -                               |
| GF0032670 | 1                            | 0                        | 0                            | 0 Cytokinin riboside 5'-monophosphate phosphoribohydrolase (1)      |                                                                                                                                                                                                                                                                                                                                                                                                            | Cytokinin riboside 5'-monophosphate phosphoribohydrolase LOG [IPRO05269] (1); LOG family [IPRO03100] (1)                                                                                                                              | scaffold_8_mRNA_370.1           | -                           | -                               |
| GF0032669 | 1                            | 0                        | 0                            | 0 Hypothetical protein (1)                                          |                                                                                                                                                                                                                                                                                                                                                                                                            |                                                                                                                                                                                                                                       | scaffold_8_mRNA_366.1           | -                           | -                               |
| GF0032668 | 1                            | 0                        | 0                            | 0 Hypothetical protein (1)                                          |                                                                                                                                                                                                                                                                                                                                                                                                            |                                                                                                                                                                                                                                       | scaffold_8_mRNA_361.1           | -                           | -                               |
| GF0032667 | 1                            | 0                        | 0                            | 0 Drought responsive protein 2 (1)                                  |                                                                                                                                                                                                                                                                                                                                                                                                            | At2g23090-like [IPRO26939] (1)                                                                                                                                                                                                        | scaffold_8_mRNA_357.1           | -                           | -                               |
| GF0032666 | 1                            | 0                        | 0                            | 0 Hypothetical protein (1)                                          |                                                                                                                                                                                                                                                                                                                                                                                                            |                                                                                                                                                                                                                                       | scaffold_8_mRNA_354.1           | -                           | -                               |
| GF0032665 | 1                            | 0                        | 0                            | 0 Hypothetical protein (1)                                          | hydrolase activity [GO:0016787 molecular_function] (1); metabolic process [GO:0008152 biological_process] (1)                                                                                                                                                                                                                                                                                              | Alpha/Beta hydrolase fold [IPRO29058] (1); Alpha/beta hydrolase fold-3 [IPRO13094] (1)                                                                                                                                                | scaffold_8_mRNA_352.1           | -                           | -                               |
| GF0032664 | 1                            | 0                        | 0                            | 0 Hypothetical protein (1)                                          |                                                                                                                                                                                                                                                                                                                                                                                                            | Fibronectin type III-like domain [IPRO26891] (1); Immunoglobulin-like fold [IPRO13783] (1)                                                                                                                                            | scaffold_8_mRNA_335.1           | -                           | -                               |
| GF0032663 | 1                            | 0                        | 0                            | 0 Hypothetical protein (1)                                          |                                                                                                                                                                                                                                                                                                                                                                                                            |                                                                                                                                                                                                                                       | scaffold_8_mRNA_332.1           | -                           | -                               |
| GF0032662 | 1                            | 0                        | 0                            | 0 Hypothetical protein (1)                                          |                                                                                                                                                                                                                                                                                                                                                                                                            |                                                                                                                                                                                                                                       | scaffold_8_mRNA_331.1           | -                           | -                               |
| GF0032661 | 1                            | 0                        | 0                            | 0 Hypothetical protein (1)                                          |                                                                                                                                                                                                                                                                                                                                                                                                            |                                                                                                                                                                                                                                       | scaffold_8_mRNA_330.1           | -                           | -                               |
| GF0032660 | 1                            | 0                        | 0                            | 0 Hypothetical protein (1)                                          |                                                                                                                                                                                                                                                                                                                                                                                                            |                                                                                                                                                                                                                                       | scaffold_8_mRNA_329.1           | -                           | -                               |
| GF0032659 | 1                            | 0                        | 0                            | 0 Hypothetical protein (1)                                          | regulation of transcription, DNA-templated [GO:0006355 biological_process] (1)                                                                                                                                                                                                                                                                                                                             | FHY3/FAR1 family [IPRO11052] (1); FAR1 DNA binding domain [IPRO04330] (1)                                                                                                                                                             | scaffold_8_mRNA_3249.1          | -                           | -                               |
| GF0032658 | 1                            | 0                        | 0                            | 0 Hypothetical protein (1)                                          |                                                                                                                                                                                                                                                                                                                                                                                                            |                                                                                                                                                                                                                                       | scaffold_8_mRNA_3248.1          | -                           | -                               |
| GF0032657 | 1                            | 0                        | 0                            | 0 Hypothetical protein (1)                                          |                                                                                                                                                                                                                                                                                                                                                                                                            |                                                                                                                                                                                                                                       | scaffold_8_mRNA_324.1           | -                           | -                               |
| GF0032656 | 1                            | 0                        | 0                            | 0 UDP-glucosyltransferase 87A1 (1)                                  | metabolic process [GO:0008152 biological_process] (1); transferase activity, transferring hexosyl groups [GO:0016758 molecular_function] (1)                                                                                                                                                                                                                                                               | UDP-glucuronosyl/UDP-glucosyltransferase [IPRO02213] (1)                                                                                                                                                                              | scaffold_8_mRNA_3220.1          | -                           | -                               |
| GF0032655 | 1                            | 0                        | 0                            | 0 ADP-ribosylation factor-like A1D (1)                              | GTP binding [GO:0005525 molecular_function] (1)                                                                                                                                                                                                                                                                                                                                                            | P-loop containing nucleoside triphosphate hydrolase [IPRO27417] (1); Small GTPase superfamily, ARF/SAR type [IPRO06689] (1)                                                                                                           | scaffold_8_mRNA_319.2           | -                           | -                               |
| GF0032654 | 1                            | 0                        | 0                            | 0 Hypothetical protein (1)                                          |                                                                                                                                                                                                                                                                                                                                                                                                            |                                                                                                                                                                                                                                       | scaffold_8_mRNA_315.1           | -                           | -                               |
| GF0032653 | 1                            | 0                        | 0                            | 0 Hypothetical protein (1)                                          |                                                                                                                                                                                                                                                                                                                                                                                                            |                                                                                                                                                                                                                                       | scaffold_8_mRNA_314.1           | -                           | -                               |
| GF0032652 | 1                            | 0                        | 0                            | 0 Putative hexose transporter (1)                                   | transmembrane transporter activity [GO:0022857 molecular_function] (1); membrane [GO:0016020 cellular_component] (1); integral component of membrane [GO:0016021 cellular_component] (1); substrate-specific transmembrane transporter activity [GO:0022891 molecular_function] (1); transmembrane transport [GO:0055085 biological_process] (1); transporter activity [GO:0005215 molecular_function] (1) | Sugar/inositol transporter [IPRO03663] (1); Major facilitator, sugar transporter-like [IPRO05283] (1); Major facilitator superfamily domain [IPRO03046] (1); Sugar transporter, conserved site [IPRO05829] (1)                        | scaffold_8_mRNA_3133.1          | -                           | -                               |
| GF0032651 | 1                            | 0                        | 0                            | 0 Serine/arginine-rich splicing factor SR45a (1)                    | nucleic acid binding [GO:0003476 molecular_function] (1)                                                                                                                                                                                                                                                                                                                                                   | RNA recognition motif domain [IPRO00504] (1)                                                                                                                                                                                          | scaffold_8_mRNA_3124.1          | -                           | -                               |
| GF0032650 | 1                            | 0                        | 0                            | 0 17.5 kDa class I heat shock protein (1)                           |                                                                                                                                                                                                                                                                                                                                                                                                            | Alpha crystallin Hsp20 domain [IPRO02088] (1); HSP20-like chaperone [IPRO08978] (1); Small heat shock protein HSP20 [IPRO31107] (1)                                                                                                   | scaffold_8_mRNA_3099.1          | -                           | -                               |
| GF0032649 | 1                            | 0                        | 0                            | 0 Monosaccharide transport protein (1)                              |                                                                                                                                                                                                                                                                                                                                                                                                            |                                                                                                                                                                                                                                       | scaffold_8_mRNA_3098.1          | -                           | -                               |
| GF0032648 | 1                            | 0                        | 0                            | 0 Monosaccharide transport protein (1)                              |                                                                                                                                                                                                                                                                                                                                                                                                            |                                                                                                                                                                                                                                       | scaffold_8_mRNA_3092.1          | -                           | -                               |
| GF0032647 | 1                            | 0                        | 0                            | 0 Hypothetical protein (1)                                          |                                                                                                                                                                                                                                                                                                                                                                                                            | Retrontransposon gag domain [IPRO05162] (1); Aspartic peptidase domain [IPRO21109] (1)                                                                                                                                                | scaffold_8_mRNA_3090.1          | -                           | -                               |
| GF0032646 | 1                            | 0                        | 0                            | 0 Subtilase family protein, putative (1)                            | serine-type endopeptidase activity [GO:0004252 molecular_function] (1); proteolysis [GO:0006508 biological_process] (1)                                                                                                                                                                                                                                                                                    | Peptidase S8 propeptide/proteinase inhibitor 19 [IPRO10259] (1); Peptidase S8/S53 domain [IPRO00209] (1)                                                                                                                              | scaffold_8_mRNA_3073.1          | -                           | -                               |
| GF0032645 | 1                            | 0                        | 0                            | 0 Hypothetical protein (1)                                          |                                                                                                                                                                                                                                                                                                                                                                                                            |                                                                                                                                                                                                                                       | scaffold_8_mRNA_3068.1          | -                           | -                               |
| GF0032644 | 1                            | 0                        | 0                            | 0 NAD(P)-binding Rossmann-fold superfamily protein isoform 1 (1)    |                                                                                                                                                                                                                                                                                                                                                                                                            | NAD(P)-binding domain [IPRO16040] (1); Short-chain dehydrogenase/reductase SDR [IPRO02347] (1)                                                                                                                                        | scaffold_8_mRNA_3061.1          | -                           | -                               |
| GF0032643 | 1                            | 0                        | 0                            | 0 Hypothetical protein (1)                                          | oxidoreductase activity [GO:0016091 molecular_function] (1)                                                                                                                                                                                                                                                                                                                                                | Short-chain dehydrogenase/reductase, conserved site [IPRO20904] (1); NAD(P)-binding domain [IPRO16040] (1); Short-chain dehydrogenase/reductase SDR [IPRO02347] (1)                                                                   | scaffold_8_mRNA_3057.1          | -                           | -                               |
| GF0032642 | 1                            | 0                        | 0                            | 0 Hypothetical protein (1)                                          |                                                                                                                                                                                                                                                                                                                                                                                                            |                                                                                                                                                                                                                                       | scaffold_8_mRNA_3054.1          | -                           | -                               |
| GF0032641 | 1                            | 0                        | 0                            | 0 Hypothetical protein (1)                                          |                                                                                                                                                                                                                                                                                                                                                                                                            |                                                                                                                                                                                                                                       | scaffold_8_mRNA_3052.1          | -                           | -                               |
| GF0032640 | 1                            | 0                        | 0                            | 0 Peptide/nitrate transporter plant (1)                             | transporter activity [GO:0005215 molecular_function] (1); membrane [GO:0016020 cellular_component] (1); transport [GO:0006810 biological_process] (1)                                                                                                                                                                                                                                                      | Proton-dependent oligopeptide transporter family [IPRO00109] (1); Major facilitator superfamily domain [IPRO20846] (1)                                                                                                                | scaffold_8_mRNA_305.1           | -                           | -                               |
| GF0032639 | 1                            | 0                        | 0                            | 0 Hypothetical protein (1)                                          |                                                                                                                                                                                                                                                                                                                                                                                                            |                                                                                                                                                                                                                                       | scaffold_8_mRNA_3039.1          | -                           | -                               |
| GF0032638 | 1                            | 0                        | 0                            | 0 Probable L-type lectin-domain containing receptor kinase II.1 (1) | ATP binding [GO:0005524 molecular_function] (1); protein kinase activity [GO:0004672 molecular_function] (1); carbohydrate binding [GO:0030246 molecular_function] (1); protein phosphorylation [GO:0006468 biological_process] (1)                                                                                                                                                                        | Concanavalin A-like lectin/glucanase domain [IPRO13320] (1); Protein kinase-like domain [IPRO11009] (1); Legume lectin domain [IPRO1120] (1); Protein kinase domain [IPRO00719] (1); Protein kinase, ATP binding site [IPRO17441] (1) | scaffold_8_mRNA_3038.1          | -                           | -                               |
| GF0032637 | 1                            | 0                        | 0                            | 0 Hypothetical protein (1)                                          |                                                                                                                                                                                                                                                                                                                                                                                                            |                                                                                                                                                                                                                                       | scaffold_8_mRNA_3037.1          | -                           | -                               |
| GF0032636 | 1                            | 0                        | 0                            | 0 Hypothetical protein (1)                                          |                                                                                                                                                                                                                                                                                                                                                                                                            |                                                                                                                                                                                                                                       | scaffold_8_mRNA_3005.1          | -                           | -                               |
| GF0032635 | 1                            | 0                        | 0                            | 0 Hypothetical protein (1)                                          |                                                                                                                                                                                                                                                                                                                                                                                                            |                                                                                                                                                                                                                                       | scaffold_8_mRNA_2998.1          | -                           | -                               |
| GF0032634 | 1                            | 0                        | 0                            | 0 Actin (1)                                                         |                                                                                                                                                                                                                                                                                                                                                                                                            | Actin family [IPRO04000] (1); Actin/actin-like conserved site [IPRO20902] (1); Actin, conserved site [IPRO04001] (1)                                                                                                                  | scaffold_8_mRNA_2983.1          | -                           | -                               |
| GF0032633 | 1                            | 0                        | 0                            | 0 Heat shock protein 70 (1)                                         |                                                                                                                                                                                                                                                                                                                                                                                                            | Heat shock protein 70kD, peptide-binding domain [IPRO29047] (1); Heat shock protein 70kD, C-terminal domain [IPRO29048] (1); Heat shock protein 70 family [IPRO13126] (1); Heat shock protein 70, conserved site [IPRO18181] (1)      | scaffold_8_mRNA_2972.1          | -                           | -                               |
| GF0032632 | 1                            | 0                        | 0                            | 0 Mutator-like transposase (1)                                      |                                                                                                                                                                                                                                                                                                                                                                                                            | MULE transposase domain [IPRO18289] (1); Transposase, Mu/DR, plant [IPRO04332] (1)                                                                                                                                                    | scaffold_8_mRNA_2969.1          | -                           | -                               |
| GF0032631 | 1                            | 0                        | 0                            | 0 Hypothetical protein (1)                                          |                                                                                                                                                                                                                                                                                                                                                                                                            |                                                                                                                                                                                                                                       | scaffold_8_mRNA_2964.1          | -                           | -                               |
| GF0032630 | 1                            | 0                        | 0                            | 0 Serine carboxypeptidase 1 (1)                                     | serine-type carboxypeptidase activity [GO:0004185 molecular_function] (1); proteolysis [GO:0006508 biological_process] (1)                                                                                                                                                                                                                                                                                 | Alpha/Beta hydrolase fold [IPRO29058] (1); Peptidase S10, serine carboxypeptidase [IPRO01565] (1)                                                                                                                                     | scaffold_8_mRNA_295.1           | -                           | -                               |
| GF0032629 | 1                            | 0                        | 0                            | 0 17.5 kDa class I heat shock protein (1)                           |                                                                                                                                                                                                                                                                                                                                                                                                            | Small heat shock protein HSP20 [IPRO31107] (1); Alpha crystallin Hsp20 domain [IPRO2068] (1); HSP20-like chaperone [IPRO08978] (1)                                                                                                    | scaffold_8_mRNA_2947.1          | -                           | -                               |
| GF0032628 | 1                            | 0                        | 0                            | 0 40S ribosomal protein S15a (1)                                    | structural constituent of ribosome [GO:0003735 molecular_function] (1); translation [GO:0006412 biological_process] (1); ribosome [GO:0005840 cellular_component] (1)                                                                                                                                                                                                                                      | Ribosomal protein S8 [IPRO00630] (1)                                                                                                                                                                                                  | scaffold_8_mRNA_2942.1          | -                           | -                               |
| GF0032627 | 1                            | 0                        | 0                            | 0 Hypothetical protein (1)                                          |                                                                                                                                                                                                                                                                                                                                                                                                            |                                                                                                                                                                                                                                       | scaffold_8_mRNA_2941.1          | -                           | -                               |

| ID        | Num. in <i>C. clementinae</i> | Num. in <i>C. uchiha</i> | Num. in <i>P. trifoliata</i> | Note                                                                       | GO                                                                                                                                                                                                                                                                                                                                                                                                                                                                                                                                                                              | InterPro                                                                                                                                                                                                                                                                                                                                                                                                                                                                                                                                             | Members in <i>C. clementinae</i> | Members in <i>C. uchiha</i> | Members in <i>P. trifoliata</i> |
|-----------|-------------------------------|--------------------------|------------------------------|----------------------------------------------------------------------------|---------------------------------------------------------------------------------------------------------------------------------------------------------------------------------------------------------------------------------------------------------------------------------------------------------------------------------------------------------------------------------------------------------------------------------------------------------------------------------------------------------------------------------------------------------------------------------|------------------------------------------------------------------------------------------------------------------------------------------------------------------------------------------------------------------------------------------------------------------------------------------------------------------------------------------------------------------------------------------------------------------------------------------------------------------------------------------------------------------------------------------------------|----------------------------------|-----------------------------|---------------------------------|
| GF0032626 | 1                             | 0                        | 0                            | 0 Ras-related protein RABE1c (1)                                           | GTPase activity [GO:0003924]<br>molecular_function (1); GTP binding [GO:0005525 molecular_function (1)                                                                                                                                                                                                                                                                                                                                                                                                                                                                          | Small GTPase superfamily [IPR001806] (1); P-loop containing nucleoside triphosphate hydrolase [IPR027417] (1); Small GTP-binding protein domain [IPR005225] (1)                                                                                                                                                                                                                                                                                                                                                                                      | scaffold_8_mRNA_2940.2           | -                           | -                               |
| GF0032625 | 1                             | 0                        | 0                            | 0 Disease resistance-responsive, dirigent domain protein (1)               |                                                                                                                                                                                                                                                                                                                                                                                                                                                                                                                                                                                 |                                                                                                                                                                                                                                                                                                                                                                                                                                                                                                                                                      | scaffold_8_mRNA_2926.1           | -                           | -                               |
| GF0032624 | 1                             | 0                        | 0                            | 0 Hypothetical protein (1)                                                 |                                                                                                                                                                                                                                                                                                                                                                                                                                                                                                                                                                                 |                                                                                                                                                                                                                                                                                                                                                                                                                                                                                                                                                      | scaffold_8_mRNA_2925.1           | -                           | -                               |
| GF0032623 | 1                             | 0                        | 0                            | 0 Histone H4 (1)                                                           | nucleosome [GO:0000786 cellular_component (1)]; protein heterodimerization activity [GO:0046982 molecular_function (1)]; nucleosome assembly [GO:0006334 biological_process (1)]; nucleus [GO:0005634 cellular_component (1)]; DNA binding [GO:0003677 molecular_function (1)                                                                                                                                                                                                                                                                                                   | Histone H4 [IPR001951] (1); Histone-fold [IPR009072] (1); Histone H4, conserved site [IPR019809] (1)                                                                                                                                                                                                                                                                                                                                                                                                                                                 | scaffold_8_mRNA_2910.1           | -                           | -                               |
| GF0032622 | 1                             | 0                        | 0                            | 0 Hypothetical protein (1)                                                 |                                                                                                                                                                                                                                                                                                                                                                                                                                                                                                                                                                                 |                                                                                                                                                                                                                                                                                                                                                                                                                                                                                                                                                      | scaffold_8_mRNA_289.1            | -                           | -                               |
| GF0032621 | 1                             | 0                        | 0                            | 0 Serine carboxypeptidase-like 8 (1)                                       | proteolysis [GO:0006508 biological_process (1)]; serine-type carboxypeptidase activity [GO:0004185 molecular_function (1)]; transporter activity [GO:0005215 molecular_function (1)]; membrane [GO:0016020 cellular_component (1)]; transport [GO:0006810 biological_process (1)                                                                                                                                                                                                                                                                                                | Peptidase S10, serine carboxypeptidase [IPR015653] (1); Alpha/Beta hydrolase fold [IPR029058] (1)                                                                                                                                                                                                                                                                                                                                                                                                                                                    | scaffold_8_mRNA_288.1            | -                           | -                               |
| GF0032620 | 1                             | 0                        | 0                            | 0 Hypothetical protein (1)                                                 |                                                                                                                                                                                                                                                                                                                                                                                                                                                                                                                                                                                 |                                                                                                                                                                                                                                                                                                                                                                                                                                                                                                                                                      | scaffold_8_mRNA_2868.1           | -                           | -                               |
| GF0032619 | 1                             | 0                        | 0                            | 0 Cytokinin riboside 5'-monophosphate phosphoribohydrolase (1)             |                                                                                                                                                                                                                                                                                                                                                                                                                                                                                                                                                                                 |                                                                                                                                                                                                                                                                                                                                                                                                                                                                                                                                                      | scaffold_8_mRNA_2860.1           | -                           | -                               |
| GF0032618 | 1                             | 0                        | 0                            | 0 RNA-directed DNA polymerase ; Ribonuclease H, putative (1)               |                                                                                                                                                                                                                                                                                                                                                                                                                                                                                                                                                                                 |                                                                                                                                                                                                                                                                                                                                                                                                                                                                                                                                                      | scaffold_8_mRNA_2856.1           | -                           | -                               |
| GF0032617 | 1                             | 0                        | 0                            | 0 Hypothetical protein (1)                                                 |                                                                                                                                                                                                                                                                                                                                                                                                                                                                                                                                                                                 |                                                                                                                                                                                                                                                                                                                                                                                                                                                                                                                                                      | scaffold_8_mRNA_2832.1           | -                           | -                               |
| GF0032616 | 1                             | 0                        | 0                            | 0 Elongation factor 1-alpha (1)                                            | GTP binding [GO:0005525 molecular_function (1)]; translational elongation [GO:0006414 biological_process (1)]; GTPase activity [GO:0003924 molecular_function (1)]; cytoplasm [GO:0005737 cellular_component (1)]; translation elongation factor activity [GO:0003746 molecular_function (1)]; translation elongation factor activity [GO:0003746 molecular_function (1)                                                                                                                                                                                                        | Transcription factor, GTP-binding domain [IPR000795] (1); Translation elongation factor EF1A/initiation factor IF2gamma, C-terminal [IPR009001] (1); Translation elongation factor EF1u-like, domain 2 [IPR004161] (1); Tr-type G domain, conserved site [IPR031571] (1); Translation elongation factor EF1A, eukaryotic/archaeal [IPR004539] (1); Translation protein, beta-barrel domain [IPR009000] (1); P-loop containing nucleoside triphosphate hydrolase [IPR027417] (1); Translation elongation factor EF1u/EF1A, C-terminal [IPR004160] (1) | scaffold_8_mRNA_2826.1           | -                           | -                               |
| GF0032615 | 1                             | 0                        | 0                            | 0 Elongation factor 1-alpha (1)                                            | GTPase activity [GO:0003924 molecular_function (1)]; cytoplasm [GO:0005737 cellular_component (1)]; translation elongation factor activity [GO:0003746 molecular_function (1)]; translational elongation [GO:0006414 biological_process (1)]; GTP binding [GO:0005525 molecular_function (1)                                                                                                                                                                                                                                                                                    | Transcription factor, GTP-binding domain [IPR000795] (1); Translation elongation factor EF1A/initiation factor IF2gamma, C-terminal [IPR009001] (1); Translation elongation factor EF1u-like, domain 2 [IPR004161] (1); Tr-type G domain, conserved site [IPR031571] (1); Translation elongation factor EF1A, eukaryotic/archaeal [IPR004539] (1); Translation protein, beta-barrel domain [IPR009000] (1); P-loop containing nucleoside triphosphate hydrolase [IPR027417] (1); Translation elongation factor EF1u/EF1A, C-terminal [IPR004160] (1) | scaffold_8_mRNA_2824.1           | -                           | -                               |
| GF0032614 | 1                             | 0                        | 0                            | 0 Hypothetical protein (1)                                                 |                                                                                                                                                                                                                                                                                                                                                                                                                                                                                                                                                                                 |                                                                                                                                                                                                                                                                                                                                                                                                                                                                                                                                                      | scaffold_8_mRNA_282.1            | -                           | -                               |
| GF0032613 | 1                             | 0                        | 0                            | 0 Hypothetical protein (1)                                                 |                                                                                                                                                                                                                                                                                                                                                                                                                                                                                                                                                                                 |                                                                                                                                                                                                                                                                                                                                                                                                                                                                                                                                                      | scaffold_8_mRNA_2800.1           | -                           | -                               |
| GF0032612 | 1                             | 0                        | 0                            | 0 F-box/kelch-repeat protein SKIP11 (1)                                    | protein binding [GO:0005515 molecular_function (1)                                                                                                                                                                                                                                                                                                                                                                                                                                                                                                                              | Kelch repeat type 1 [IPR006652] (1); Kelch-type beta propeller [IPR015915] (1)                                                                                                                                                                                                                                                                                                                                                                                                                                                                       | scaffold_8_mRNA_2799.1           | -                           | -                               |
| GF0032611 | 1                             | 0                        | 0                            | 0 Ankyrin repeat plant-like protein (1)                                    | protein binding [GO:0005515 molecular_function (1)                                                                                                                                                                                                                                                                                                                                                                                                                                                                                                                              | Ankyrin repeat [IPR002110] (1); Ankyrin repeat-containing domain [IPR020832] (1); PGD domain [IPR026961] (1)                                                                                                                                                                                                                                                                                                                                                                                                                                         | scaffold_8_mRNA_2783.1           | -                           | -                               |
| GF0032610 | 1                             | 0                        | 0                            | 0 Ankyrin repeat family protein (1)                                        |                                                                                                                                                                                                                                                                                                                                                                                                                                                                                                                                                                                 |                                                                                                                                                                                                                                                                                                                                                                                                                                                                                                                                                      | scaffold_8_mRNA_2782.1           | -                           | -                               |
| GF0032609 | 1                             | 0                        | 0                            | 0 Hypothetical protein (1)                                                 | ADP binding [GO:0043531 molecular_function (1)                                                                                                                                                                                                                                                                                                                                                                                                                                                                                                                                  | Winged helix-helix DNA-binding domain [IPR011991] (1); NB-ARC [IPR021821] (1)                                                                                                                                                                                                                                                                                                                                                                                                                                                                        | scaffold_8_mRNA_2774.1           | -                           | -                               |
| GF0032608 | 1                             | 0                        | 0                            | 0 Hypothetical protein (1)                                                 |                                                                                                                                                                                                                                                                                                                                                                                                                                                                                                                                                                                 |                                                                                                                                                                                                                                                                                                                                                                                                                                                                                                                                                      | scaffold_8_mRNA_2771.1           | -                           | -                               |
| GF0032607 | 1                             | 0                        | 0                            | 0 Pleiotropic drug resistance protein 1 (1)                                | membrane [GO:0016020 cellular_component (1)]; ATPase activity [GO:0016887 molecular_function (1)]; ATP binding [GO:0005524 molecular_function (1)                                                                                                                                                                                                                                                                                                                                                                                                                               | Domain of unknown function DUF588 [IPR006702] (1)                                                                                                                                                                                                                                                                                                                                                                                                                                                                                                    | scaffold_8_mRNA_2770.1           | -                           | -                               |
| GF0032606 | 1                             | 0                        | 0                            | 0 Hypothetical protein (1)                                                 |                                                                                                                                                                                                                                                                                                                                                                                                                                                                                                                                                                                 |                                                                                                                                                                                                                                                                                                                                                                                                                                                                                                                                                      | scaffold_8_mRNA_2753.1           | -                           | -                               |
| GF0032605 | 1                             | 0                        | 0                            | 0 Hypothetical protein (1)                                                 | catalytic activity [GO:0003824 molecular_function (1)                                                                                                                                                                                                                                                                                                                                                                                                                                                                                                                           | L-Asparatase-like [IPR008948] (1); Fumarate/histidase, N-terminal [IPR024083] (1); Aromatic amino acid lyase [IPR001106] (1)                                                                                                                                                                                                                                                                                                                                                                                                                         | scaffold_8_mRNA_2750.1           | -                           | -                               |
| GF0032604 | 1                             | 0                        | 0                            | 0 Hypothetical protein (1)                                                 |                                                                                                                                                                                                                                                                                                                                                                                                                                                                                                                                                                                 |                                                                                                                                                                                                                                                                                                                                                                                                                                                                                                                                                      | scaffold_8_mRNA_2734.1           | -                           | -                               |
| GF0032603 | 1                             | 0                        | 0                            | 0 High-affinity nitrate transporter (1)                                    | integral component of membrane [GO:0016021 cellular_component (1)]; transmembrane transport [GO:0005085 biological_process (1)                                                                                                                                                                                                                                                                                                                                                                                                                                                  | Major facilitator superfamily [IPR011701] (1); Major facilitator superfamily domain [IPR020846] (1)                                                                                                                                                                                                                                                                                                                                                                                                                                                  | scaffold_8_mRNA_2730.1           | -                           | -                               |
| GF0032602 | 1                             | 0                        | 0                            | 0 Polynucleotidyl transferase, ribonuclease H-like superfamily protein (1) | nucleic acid binding [GO:0003676 molecular_function (1)                                                                                                                                                                                                                                                                                                                                                                                                                                                                                                                         | Ribonuclease H-like domain [IPR012337] (1)                                                                                                                                                                                                                                                                                                                                                                                                                                                                                                           | scaffold_8_mRNA_2717.1           | -                           | -                               |
| GF0032601 | 1                             | 0                        | 0                            | 0 Probable xyloglucan endotransglucosylase/hydrolase protein 32 (1)        | cellular glucan metabolic process [GO:0006073 biological_process (1)]; apoplast [GO:0048046 cellular_component (1)]; carbohydrate metabolic process [GO:0005975 biological_process (1)]; cell wall [GO:0005618 cellular_component (1)]; hydrolase activity, hydrolyzing O-glycosyl compounds, hydrolyzing O-glycosyl compounds [GO:0004553 molecular_function (1)]; xyloglucan:xyloglucosyl transferase activity [GO:0016762 molecular_function (1)]; cell wall biogenesis [GO:0042546 biological_process (1)]; xyloglucan metabolic process [GO:0010411 biological_process (1) | Xyloglucan endotransglucosylase/hydrolase [IPR016455] (1); Concanavalin A-like lectin glucanase domain [IPR013320] (1); Glycoside hydrolase family 16 [IPR000757] (1); Xyloglucan endotransglucosylase, C-terminal [IPR010713] (1)                                                                                                                                                                                                                                                                                                                   | scaffold_8_mRNA_2704.1           | -                           | -                               |
| GF0032600 | 1                             | 0                        | 0                            | 0 Ribonuclease H-like superfamily protein (1)                              | nucleic acid binding [GO:0003676 molecular_function (1)                                                                                                                                                                                                                                                                                                                                                                                                                                                                                                                         | Reverse transcriptase zinc-binding domain [IPR026960] (1); Ribonuclease H-like domain [IPR012337] (1)                                                                                                                                                                                                                                                                                                                                                                                                                                                | scaffold_8_mRNA_2703.1           | -                           | -                               |
| GF0032599 | 1                             | 0                        | 0                            | 0 Hypothetical protein (1)                                                 |                                                                                                                                                                                                                                                                                                                                                                                                                                                                                                                                                                                 |                                                                                                                                                                                                                                                                                                                                                                                                                                                                                                                                                      | scaffold_8_mRNA_270.1            | -                           | -                               |
| GF0032598 | 1                             | 0                        | 0                            | 0 Hypothetical protein (1)                                                 |                                                                                                                                                                                                                                                                                                                                                                                                                                                                                                                                                                                 |                                                                                                                                                                                                                                                                                                                                                                                                                                                                                                                                                      | scaffold_8_mRNA_2696.1           | -                           | -                               |
| GF0032597 | 1                             | 0                        | 0                            | 0 Hypothetical protein (1)                                                 |                                                                                                                                                                                                                                                                                                                                                                                                                                                                                                                                                                                 |                                                                                                                                                                                                                                                                                                                                                                                                                                                                                                                                                      | scaffold_8_mRNA_2688.1           | -                           | -                               |
| GF0032596 | 1                             | 0                        | 0                            | 0 Hypothetical protein (1)                                                 |                                                                                                                                                                                                                                                                                                                                                                                                                                                                                                                                                                                 |                                                                                                                                                                                                                                                                                                                                                                                                                                                                                                                                                      | scaffold_8_mRNA_2675.1           | -                           | -                               |
| GF0032595 | 1                             | 0                        | 0                            | 0 Lysosomal Pro-Xaa carboxypeptidase (1)                                   | proteolysis [GO:0006508 biological_process (1)]; serine-type peptidase activity [GO:0008236 molecular_function (1)                                                                                                                                                                                                                                                                                                                                                                                                                                                              | Peptidase S28 [IPR008758] (1)                                                                                                                                                                                                                                                                                                                                                                                                                                                                                                                        | scaffold_8_mRNA_2666.1           | -                           | -                               |
| GF0032594 | 1                             | 0                        | 0                            | 0 Hypothetical protein (1)                                                 |                                                                                                                                                                                                                                                                                                                                                                                                                                                                                                                                                                                 |                                                                                                                                                                                                                                                                                                                                                                                                                                                                                                                                                      | scaffold_8_mRNA_2663.1           | -                           | -                               |
| GF0032593 | 1                             | 0                        | 0                            | 0 Lysosomal Pro-Xaa carboxypeptidase (1)                                   |                                                                                                                                                                                                                                                                                                                                                                                                                                                                                                                                                                                 |                                                                                                                                                                                                                                                                                                                                                                                                                                                                                                                                                      | scaffold_8_mRNA_2661.1           | -                           | -                               |
| GF0032592 | 1                             | 0                        | 0                            | 0 Hypothetical protein (1)                                                 |                                                                                                                                                                                                                                                                                                                                                                                                                                                                                                                                                                                 |                                                                                                                                                                                                                                                                                                                                                                                                                                                                                                                                                      | scaffold_8_mRNA_2655.1           | -                           | -                               |
| GF0032591 | 1                             | 0                        | 0                            | 0 Lysosomal Pro-Xaa carboxypeptidase (1)                                   | proteolysis [GO:0006508 biological_process (1)]; serine-type peptidase activity [GO:0008236 molecular_function (1)                                                                                                                                                                                                                                                                                                                                                                                                                                                              | Alpha/Beta hydrolase fold [IPR029058] (1); Peptidase S28 [IPR008758] (1)                                                                                                                                                                                                                                                                                                                                                                                                                                                                             | scaffold_8_mRNA_2653.1           | -                           | -                               |
| GF0032590 | 1                             | 0                        | 0                            | 0 Argonaute 1 (1)                                                          | protein binding [GO:0005515 molecular_function (1)]; zinc ion binding [GO:0008270 molecular_function (1)]; nucleic acid binding [GO:0003676 molecular_function (1)                                                                                                                                                                                                                                                                                                                                                                                                              | Argonaute, linker 1 domain [IPR014811] (1); Ribonuclease H-like domain [IPR012337] (1); Zinc finger, PAMZ-type [IPR006564] (1); Argonaute linker 2 domain [IPR032472] (1); Zinc finger, SWIM-type [IPR007527] (1); PAZ domain [IPR031100] (1); Pwi domain [IPR03165] (1); Protein argonaute, N-terminal [IPR032474] (1)                                                                                                                                                                                                                              | scaffold_8_mRNA_2648.1           | -                           | -                               |

| ID        | Num. in <i>C. clementiae</i> | Num. in <i>C. uchiha</i> | Num. in <i>P. trifoliata</i> | Note                                                                 | GO                                                                                                                                                                                                                                                                                                                             | InterPro                                                                                                                                                                                                                                                                                                                                     | Members in <i>C. clementiae</i> | Members in <i>C. uchiha</i> | Members in <i>P. trifoliata</i> |
|-----------|------------------------------|--------------------------|------------------------------|----------------------------------------------------------------------|--------------------------------------------------------------------------------------------------------------------------------------------------------------------------------------------------------------------------------------------------------------------------------------------------------------------------------|----------------------------------------------------------------------------------------------------------------------------------------------------------------------------------------------------------------------------------------------------------------------------------------------------------------------------------------------|---------------------------------|-----------------------------|---------------------------------|
| GF0032589 | 1                            | 0                        | 0                            | 0 Argonemate 1 (1)                                                   | protein binding [GO:0005515]<br>molecular_function (1); nucleic acid binding [GO:0003676]<br>molecular_function (1)                                                                                                                                                                                                            | Pwi domain [IPRO03165] (1); Protein argonemate, N-terminal [IPRO032474] (1); Argonemate linker 2 domain [IPRO032472] (1); Argonemate linker 1 domain [IPRO14811] (1); Ribonuclease H-like domain [IPRO12337] (1); Protein argonemate, Mid domain [IPRO032473] (1); PAZ domain [IPRO03100] (1)                                                | scaffold_8_mRNA_2642.1          | -                           | -                               |
| GF0032588 | 1                            | 0                        | 0                            | 0 Hypothetical protein (1)                                           |                                                                                                                                                                                                                                                                                                                                |                                                                                                                                                                                                                                                                                                                                              | scaffold_8_mRNA_2633.1          | -                           | -                               |
| GF0032587 | 1                            | 0                        | 0                            | 0 Cysteine-rich RLK 34, putative isoform (1)                         | protein kinase activity [GO:0004672]<br>molecular_function (1); protein phosphorylation [GO:0006468]<br>biological_process (1); ATP binding [GO:0005524]<br>molecular_function (1); carbohydrate metabolic process [GO:0005975]<br>biological_process (1); chain binding [GO:0000061]<br>molecular_function (1)                | Protein kinase domain [IPRO000719] (1); Chitinase II [IPRO11583] (1); Protein kinase-like domain [IPRO11009] (1); Glycoside hydrolase superfamily [IPRO17853] (1); Serine/threonine-protein kinase, active site [IPRO08271] (1); Chitinase insertion domain [IPRO20070] (1); Glycoside hydrolase family 18, catalytic domain [IPRO01223] (1) | scaffold_8_mRNA_2631.1          | -                           | -                               |
| GF0032586 | 1                            | 0                        | 0                            | 0 DUF3128 family protein (1)                                         |                                                                                                                                                                                                                                                                                                                                | Protein of unknown function DUF3128 [IPRO21475] (1)                                                                                                                                                                                                                                                                                          | scaffold_8_mRNA_2616.1          | -                           | -                               |
| GF0032585 | 1                            | 0                        | 0                            | 0 Hypothetical protein (1)                                           | terpene synthase activity [GO:0010333]<br>molecular_function (1); lyase activity [GO:0016829]<br>molecular_function (1); magnesium ion binding [GO:0000287]<br>molecular_function (1)                                                                                                                                          | Terpene synthase, metal-binding domain [IPRO06530] (1); Isoprenoid synthase domain [IPRO08949] (1)                                                                                                                                                                                                                                           | scaffold_8_mRNA_2607.1          | -                           | -                               |
| GF0032584 | 1                            | 0                        | 0                            | 0 Putative mDR family transposase-like (1)                           | transposase activity [GO:0004803]<br>molecular_function (1); transposition, DNA-mediated [GO:0006313]<br>biological_process (1); zinc ion binding [GO:0000270]<br>molecular_function (1); DNA binding [GO:0003677]<br>molecular_function (1)                                                                                   | Transposase, mutator type [IPRO01207] (1); Zinc finger, PMZ-type [IPRO06564] (1); Zinc finger, SWIM-type [IPRO07527] (1)                                                                                                                                                                                                                     | scaffold_8_mRNA_2601.1          | -                           | -                               |
| GF0032583 | 1                            | 0                        | 0                            | 0 Hypothetical protein (1)                                           |                                                                                                                                                                                                                                                                                                                                |                                                                                                                                                                                                                                                                                                                                              | scaffold_8_mRNA_2588.1          | -                           | -                               |
| GF0032582 | 1                            | 0                        | 0                            | 0 Non-LTR retroelement reverse transcriptase-like (1)                | nucleic acid binding [GO:0003676]<br>molecular_function (1)                                                                                                                                                                                                                                                                    | Reverse transcriptase zinc-binding domain [IPRO05900] (1); Ribonuclease H-like domain [IPRO12337] (1)                                                                                                                                                                                                                                        | scaffold_8_mRNA_2582.1          | -                           | -                               |
| GF0032581 | 1                            | 0                        | 0                            | 0 Hypothetical protein (1)                                           |                                                                                                                                                                                                                                                                                                                                |                                                                                                                                                                                                                                                                                                                                              | scaffold_8_mRNA_2580.1          | -                           | -                               |
| GF0032580 | 1                            | 0                        | 0                            | 0 UDP-glycosyltransferase 91C1 (1)                                   | transferase activity, transferring hexosyl groups [GO:0016758]<br>molecular_function (1); metabolic process [GO:0008152]<br>biological_process (1)                                                                                                                                                                             | UDP-glucuronosylUDP-glucosyltransferase [IPRO02213] (1)                                                                                                                                                                                                                                                                                      | scaffold_8_mRNA_2578.1          | -                           | -                               |
| GF0032579 | 1                            | 0                        | 0                            | 0 Unspecific monooxygenase (1)                                       | heme binding [GO:0020037]<br>molecular_function (1); iron ion binding [GO:0005506]<br>molecular_function (1); oxidoreductase activity, acting on paired donors, with incorporation or reduction of molecular oxygen [GO:0016705]<br>molecular_function (1); oxidation-reduction process [GO:0055114]<br>biological_process (1) | Cytochrome P450, E-class, group I [IPRO02401] (1); Cytochrome P450 [IPRO01128] (1)                                                                                                                                                                                                                                                           | scaffold_8_mRNA_2554.1          | -                           | -                               |
| GF0032578 | 1                            | 0                        | 0                            | 0 Hypothetical protein (1)                                           |                                                                                                                                                                                                                                                                                                                                |                                                                                                                                                                                                                                                                                                                                              | scaffold_8_mRNA_2544.1          | -                           | -                               |
| GF0032577 | 1                            | 0                        | 0                            | 0 Fatty acyl-CoA reductase 3 (1)                                     | fatty acyl-CoA reductase (alcohol-forming) activity [GO:0008019]<br>molecular_function (1)                                                                                                                                                                                                                                     | Male sterility, NAD-binding [IPRO13120] (1); Fatty acyl-CoA reductase [IPRO02605] (1)                                                                                                                                                                                                                                                        | scaffold_8_mRNA_2542.1          | -                           | -                               |
| GF0032576 | 1                            | 0                        | 0                            | 0 Hypothetical protein (1)                                           |                                                                                                                                                                                                                                                                                                                                | LOG family [IPRO31100] (1)                                                                                                                                                                                                                                                                                                                   | scaffold_8_mRNA_2540.1          | -                           | -                               |
| GF0032575 | 1                            | 0                        | 0                            | 0 Hypothetical protein (1)                                           |                                                                                                                                                                                                                                                                                                                                |                                                                                                                                                                                                                                                                                                                                              | scaffold_8_mRNA_2539.1          | -                           | -                               |
| GF0032574 | 1                            | 0                        | 0                            | 0 Hypothetical protein (1)                                           |                                                                                                                                                                                                                                                                                                                                |                                                                                                                                                                                                                                                                                                                                              | scaffold_8_mRNA_2538.1          | -                           | -                               |
| GF0032573 | 1                            | 0                        | 0                            | 0 Hypothetical protein (1)                                           |                                                                                                                                                                                                                                                                                                                                |                                                                                                                                                                                                                                                                                                                                              | scaffold_8_mRNA_2533.1          | -                           | -                               |
| GF0032572 | 1                            | 0                        | 0                            | 0 Hypothetical protein (1)                                           |                                                                                                                                                                                                                                                                                                                                |                                                                                                                                                                                                                                                                                                                                              | scaffold_8_mRNA_2520.1          | -                           | -                               |
| GF0032571 | 1                            | 0                        | 0                            | 0 Myricetin O-methyltransferase (1)                                  | O-methyltransferase activity [GO:0008171]<br>molecular_function (1)                                                                                                                                                                                                                                                            | O-methyltransferase, family 2 [IPRO01077] (1); Winged helix-turn-helix DNA-binding domain [IPRO11991] (1)                                                                                                                                                                                                                                    | scaffold_8_mRNA_2515.1          | -                           | -                               |
| GF0032570 | 1                            | 0                        | 0                            | 0 Hypothetical protein (1)                                           |                                                                                                                                                                                                                                                                                                                                |                                                                                                                                                                                                                                                                                                                                              | scaffold_8_mRNA_2514.1          | -                           | -                               |
| GF0032569 | 1                            | 0                        | 0                            | 0 Cytokinin riboside 5'-monophosphate phosphoribohydrolase (1)       | molecular_function (1); transposition, LOG family [IPRO31100] (1)                                                                                                                                                                                                                                                              |                                                                                                                                                                                                                                                                                                                                              | scaffold_8_mRNA_2513.1          | -                           | -                               |
| GF0032568 | 1                            | 0                        | 0                            | 0 Hypothetical protein (1)                                           |                                                                                                                                                                                                                                                                                                                                |                                                                                                                                                                                                                                                                                                                                              | scaffold_8_mRNA_2511.1          | -                           | -                               |
| GF0032567 | 1                            | 0                        | 0                            | 0 Hypothetical protein (1)                                           |                                                                                                                                                                                                                                                                                                                                |                                                                                                                                                                                                                                                                                                                                              | scaffold_8_mRNA_2510.1          | -                           | -                               |
| GF0032566 | 1                            | 0                        | 0                            | 0 Hypothetical protein (1)                                           |                                                                                                                                                                                                                                                                                                                                |                                                                                                                                                                                                                                                                                                                                              | scaffold_8_mRNA_2505.1          | -                           | -                               |
| GF0032565 | 1                            | 0                        | 0                            | 0 Hypothetical protein (1)                                           |                                                                                                                                                                                                                                                                                                                                |                                                                                                                                                                                                                                                                                                                                              | scaffold_8_mRNA_2503.1          | -                           | -                               |
| GF0032564 | 1                            | 0                        | 0                            | 0 Cytokinin riboside 5'-monophosphate phosphoribohydrolase (1)       |                                                                                                                                                                                                                                                                                                                                | LOG family [IPRO31100] (1)                                                                                                                                                                                                                                                                                                                   | scaffold_8_mRNA_2502.1          | -                           | -                               |
| GF0032563 | 1                            | 0                        | 0                            | 0 Putative mDR family transposase-like (1)                           | zinc ion binding [GO:0008270]<br>molecular_function (1)                                                                                                                                                                                                                                                                        | MULE transposase domain [IPRO18289] (1); Zinc finger, PMZ-type [IPRO06564] (1); Zinc finger, SWIM-type [IPRO07527] (1)                                                                                                                                                                                                                       | scaffold_8_mRNA_2500.1          | -                           | -                               |
| GF0032562 | 1                            | 0                        | 0                            | 0 Hypothetical protein (1)                                           |                                                                                                                                                                                                                                                                                                                                |                                                                                                                                                                                                                                                                                                                                              | scaffold_8_mRNA_2499.1          | -                           | -                               |
| GF0032561 | 1                            | 0                        | 0                            | 0 Hypothetical protein (1)                                           | root development [GO:0048364]<br>biological_process (1)                                                                                                                                                                                                                                                                        | C-terminally encoded peptide [IPRO33250] (1)                                                                                                                                                                                                                                                                                                 | scaffold_8_mRNA_2494.1          | -                           | -                               |
| GF0032560 | 1                            | 0                        | 0                            | 0 Branched-chain-amino-acid transaminase (1)                         | branched-chain-amino-acid transaminase activity [GO:0004084]<br>molecular_function (1); branched-chain amino acid metabolic process [GO:0009081]<br>biological_process (1); catalytic activity [GO:0003624]<br>molecular_function (1); metabolic process [GO:0008152]<br>biological_process (1)                                | Branched-chain amino acid aminotransferase II [IPRO05786] (1); Aminotransferase class IV [IPRO01544] (1); Aminotransferase, class IV, conserved site [IPRO13000] (1); Branched-chain aminotransferase [IPRO33939] (1)                                                                                                                        | scaffold_8_mRNA_2491.1          | -                           | -                               |
| GF0032559 | 1                            | 0                        | 0                            | 0 Hypothetical protein (1)                                           | viral process [GO:0016032]<br>biological_process (1)                                                                                                                                                                                                                                                                           | Retroviral nucleocapsid protein Gag [IPRO00721] (1); Retrovirus capsid, C-terminal [IPRO08916] (1)                                                                                                                                                                                                                                           | scaffold_8_mRNA_2489.1          | -                           | -                               |
| GF0032558 | 1                            | 0                        | 0                            | 0 Hypothetical protein (1)                                           |                                                                                                                                                                                                                                                                                                                                |                                                                                                                                                                                                                                                                                                                                              | scaffold_8_mRNA_2477.1          | -                           | -                               |
| GF0032557 | 1                            | 0                        | 0                            | 0 Hypothetical protein (1)                                           |                                                                                                                                                                                                                                                                                                                                | Retrovirus gag domain [IPRO05162] (1)                                                                                                                                                                                                                                                                                                        | scaffold_8_mRNA_2476.1          | -                           | -                               |
| GF0032556 | 1                            | 0                        | 0                            | 0 Hypothetical protein (1)                                           |                                                                                                                                                                                                                                                                                                                                |                                                                                                                                                                                                                                                                                                                                              | scaffold_8_mRNA_2469.1          | -                           | -                               |
| GF0032555 | 1                            | 0                        | 0                            | 0 Hypothetical protein (1)                                           | aspartic-type endopeptidase activity [GO:0004190]<br>molecular_function (1); proteolysis [GO:0006508]<br>biological_process (1)                                                                                                                                                                                                | Retroviral aspartyl protease [IPRO13242] (1); Aspartic peptidase domain [IPRO21109] (1); Aspartic peptidase, active site [IPRO01969] (1)                                                                                                                                                                                                     | scaffold_8_mRNA_2460.1          | -                           | -                               |
| GF0032554 | 1                            | 0                        | 0                            | 0 Hypothetical protein (1)                                           |                                                                                                                                                                                                                                                                                                                                |                                                                                                                                                                                                                                                                                                                                              | scaffold_8_mRNA_2459.1          | -                           | -                               |
| GF0032553 | 1                            | 0                        | 0                            | 0 Hypothetical protein (1)                                           |                                                                                                                                                                                                                                                                                                                                |                                                                                                                                                                                                                                                                                                                                              | scaffold_8_mRNA_2448.1          | -                           | -                               |
| GF0032552 | 1                            | 0                        | 0                            | 0 Hypothetical protein (1)                                           |                                                                                                                                                                                                                                                                                                                                |                                                                                                                                                                                                                                                                                                                                              | scaffold_8_mRNA_2444.1          | -                           | -                               |
| GF0032551 | 1                            | 0                        | 0                            | 0 Hypothetical protein (1)                                           |                                                                                                                                                                                                                                                                                                                                |                                                                                                                                                                                                                                                                                                                                              | scaffold_8_mRNA_2443.1          | -                           | -                               |
| GF0032550 | 1                            | 0                        | 0                            | 0 Cytokinin riboside 5'-monophosphate phosphoribohydrolase (1)       |                                                                                                                                                                                                                                                                                                                                | LOG family [IPRO31100] (1)                                                                                                                                                                                                                                                                                                                   | scaffold_8_mRNA_2442.1          | -                           | -                               |
| GF0032549 | 1                            | 0                        | 0                            | 0 LRR receptor-like serine/threonine-protein kinase GSO1 (1)         | protein binding [GO:0005515]<br>molecular_function (1)                                                                                                                                                                                                                                                                         | Leucine-rich repeat domain, L domain-like [IPRO32675] (1); Leucine-rich repeat, typical subtype [IPRO03591] (1); Leucine-rich repeat-containing N-terminal, plant-type [IPRO13210] (1); Leucine-rich repeat [IPRO01611] (1)                                                                                                                  | scaffold_8_mRNA_2436.1          | -                           | -                               |
| GF0032548 | 1                            | 0                        | 0                            | 0 Dcp1-like decapping family protein (1)                             | positive regulation of catalytic activity [GO:0043085]<br>biological_process (1); deadenylation-dependent decapping of nuclear-transcribed mRNA [GO:0000290]<br>biological_process (1); enzyme activator activity [GO:0008047]<br>molecular_function (1)                                                                       | mRNA-decapping enzyme subunit 1 [IPRO10334] (1); PH domain-like [IPRO11993] (1)                                                                                                                                                                                                                                                              | scaffold_8_mRNA_2433.1          | -                           | -                               |
| GF0032547 | 1                            | 0                        | 0                            | 0 LRR receptor-like serine/threonine-protein kinase GSO1 (1)         | protein binding [GO:0005515]<br>molecular_function (1)                                                                                                                                                                                                                                                                         | Leucine-rich repeat [IPRO01611] (1); Leucine-rich repeat domain, L domain-like [IPRO32675] (1); Leucine-rich repeat, typical subtype [IPRO03591] (1); Leucine-rich repeat 4 [IPRO025875] (1); Leucine-rich repeat domain, L domain-like [IPRO32675] (1)                                                                                      | scaffold_8_mRNA_2426.1          | -                           | -                               |
| GF0032546 | 1                            | 0                        | 0                            | 0 Hypothetical protein (1)                                           |                                                                                                                                                                                                                                                                                                                                |                                                                                                                                                                                                                                                                                                                                              | scaffold_8_mRNA_2422.1          | -                           | -                               |
| GF0032545 | 1                            | 0                        | 0                            | 0 NF-kappa-B inhibitor-like protein 2 isoform 1 (1)                  |                                                                                                                                                                                                                                                                                                                                | FAM192A-FYF6, N-terminal [IPRO19331] (1); Leucine-rich repeat [IPRO01611] (1);                                                                                                                                                                                                                                                               | scaffold_8_mRNA_2421.1          | -                           | -                               |
| GF0032544 | 1                            | 0                        | 0                            | 0 Protein phosphatase 1 regulatory subunit 1DSD22, putative (1)      | protein binding [GO:0005515]<br>molecular_function (1)                                                                                                                                                                                                                                                                         | Pectin lyase fold/virulence factor [IPRO11050] (1); Pectin lyase fold [IPRO12334] (1); Leucine-rich repeat domain, L domain-like [IPRO32675] (1)                                                                                                                                                                                             | scaffold_8_mRNA_2420.1          | -                           | -                               |
| GF0032543 | 1                            | 0                        | 0                            | 0 Probable F-box protein At1g60180 (1)                               | protein binding [GO:0005515]<br>molecular_function (1)                                                                                                                                                                                                                                                                         | F-box domain [IPRO01810] (1)                                                                                                                                                                                                                                                                                                                 | scaffold_8_mRNA_2418.1          | -                           | -                               |
| GF0032542 | 1                            | 0                        | 0                            | 0 Hypothetical protein (1)                                           |                                                                                                                                                                                                                                                                                                                                |                                                                                                                                                                                                                                                                                                                                              | scaffold_8_mRNA_2417.1          | -                           | -                               |
| GF0032541 | 1                            | 0                        | 0                            | 0 Hypothetical protein (1)                                           |                                                                                                                                                                                                                                                                                                                                |                                                                                                                                                                                                                                                                                                                                              | scaffold_8_mRNA_2413.1          | -                           | -                               |
| GF0032540 | 1                            | 0                        | 0                            | 0 Probable F-box protein At1g60180 (1)                               | protein binding [GO:0005515]<br>molecular_function (1)                                                                                                                                                                                                                                                                         | F-box domain [IPRO01810] (1)                                                                                                                                                                                                                                                                                                                 | scaffold_8_mRNA_2411.1          | -                           | -                               |
| GF0032539 | 1                            | 0                        | 0                            | 0 Disease resistance family protein/LRR family protein, putative (1) | protein binding [GO:0005515]<br>molecular_function (1)                                                                                                                                                                                                                                                                         | Leucine-rich repeat, typical subtype [IPRO03591] (1); Leucine-rich repeat domain, L domain-like [IPRO32675] (1); Leucine-rich repeat-containing N-terminal, plant-type [IPRO13210] (1); Leucine-rich repeat [IPRO01611] (1)                                                                                                                  | scaffold_8_mRNA_2409.1          | -                           | -                               |

| ID        | Num in <i>C. clementinae</i> | Num in <i>C. uchiha</i> | Num in <i>P. trifoliata</i> | Note                                                                   | GO                                                                                                                                                                                                                                                                                                                                                                                                       | InterPro                                                                                                                                                                                                                                                                                                                                                                 | Members in <i>C. clementinae</i> | Members in <i>C. uchiha</i> | Members in <i>P. trifoliata</i> |
|-----------|------------------------------|-------------------------|-----------------------------|------------------------------------------------------------------------|----------------------------------------------------------------------------------------------------------------------------------------------------------------------------------------------------------------------------------------------------------------------------------------------------------------------------------------------------------------------------------------------------------|--------------------------------------------------------------------------------------------------------------------------------------------------------------------------------------------------------------------------------------------------------------------------------------------------------------------------------------------------------------------------|----------------------------------|-----------------------------|---------------------------------|
| GF0032538 | 1                            | 0                       | 0                           | 0 Polygalacturonase (1)                                                | polygalacturonase activity [GO:0004656] molecular_function (1); carbohydrate metabolic process [GO:0005975] biological_process (1)                                                                                                                                                                                                                                                                       | Parallel beta-helix repeat [IPR006626] (1); Glycoside hydrolase, family 28 [IPR00743] (1); Pectin lyase fold/virulence factor [IPR011050] (1); Pectin lyase fold [IPR012334] (1); Leucine-rich repeat-containing N-terminal, plant-type [IPR013210] (1); Leucine-rich repeat, typical subtype [IPR003591] (1); Leucine-rich repeat domain, L domain-like [IPR032675] (1) | scaffold_8_mRNA_2406.1           | -                           | -                               |
| GF0032537 | 1                            | 0                       | 0                           | 0 Disease resistance family protein / LRR family protein, putative (1) | protein binding [GO:0005515] molecular_function (1)                                                                                                                                                                                                                                                                                                                                                      | Leucine-rich repeat, typical subtype [IPR003591] (1); Leucine-rich repeat domain, L domain-like [IPR032675] (1)                                                                                                                                                                                                                                                          | scaffold_8_mRNA_2405.1           | -                           | -                               |
| GF0032536 | 1                            | 0                       | 0                           | 0 Hypothetical protein (1)                                             |                                                                                                                                                                                                                                                                                                                                                                                                          | LOG family [IPR031100] (1)                                                                                                                                                                                                                                                                                                                                               | scaffold_8_mRNA_2395.1           | -                           | -                               |
| GF0032535 | 1                            | 0                       | 0                           | 0 Short chain alcohol dehydrogenase, putative (1)                      | oxidoreductase activity [GO:0016491] molecular_function (1)                                                                                                                                                                                                                                                                                                                                              | NAD(P)-binding domain [IPR016040] (1); Short-chain dehydrogenase/reductase, conserved site [IPR02094] (1); Short-chain dehydrogenase/reductase SDR [IPR002347] (1)                                                                                                                                                                                                       | scaffold_8_mRNA_2393.1           | -                           | -                               |
| GF0032534 | 1                            | 0                       | 0                           | 0 Hypothetical protein (1)                                             |                                                                                                                                                                                                                                                                                                                                                                                                          | K Homology domain [IPR004087] (1); K Homology domain, type 1 [IPR004088] (1)                                                                                                                                                                                                                                                                                             | scaffold_8_mRNA_2391.1           | -                           | -                               |
| GF0032533 | 1                            | 0                       | 0                           | 0 RNA-binding protein pso1 (1)                                         | nucleic acid binding [GO:0003676] molecular_function (1); RNA binding [GO:0003723] molecular_function (1)                                                                                                                                                                                                                                                                                                |                                                                                                                                                                                                                                                                                                                                                                          | scaffold_8_mRNA_2389.1           | -                           | -                               |
| GF0032532 | 1                            | 0                       | 0                           | 0 Monosaccharide transport protein (1)                                 |                                                                                                                                                                                                                                                                                                                                                                                                          |                                                                                                                                                                                                                                                                                                                                                                          | scaffold_8_mRNA_238.1            | -                           | -                               |
| GF0032531 | 1                            | 0                       | 0                           | 0 Hypothetical protein (1)                                             | zinc ion binding [GO:0008270] molecular_function (1)                                                                                                                                                                                                                                                                                                                                                     | Zinc finger, PMZ-type [IPR006564] (1); Zinc finger, SWIM-type [IPR007527] (1)                                                                                                                                                                                                                                                                                            | scaffold_8_mRNA_2378.1           | -                           | -                               |
| GF0032530 | 1                            | 0                       | 0                           | 0 Hypothetical protein (1)                                             |                                                                                                                                                                                                                                                                                                                                                                                                          |                                                                                                                                                                                                                                                                                                                                                                          | scaffold_8_mRNA_236.1            | -                           | -                               |
| GF0032529 | 1                            | 0                       | 0                           | 0 Hypothetical protein (1)                                             |                                                                                                                                                                                                                                                                                                                                                                                                          |                                                                                                                                                                                                                                                                                                                                                                          | scaffold_8_mRNA_2355.1           | -                           | -                               |
| GF0032528 | 1                            | 0                       | 0                           | 0 Hypothetical protein (1)                                             | nucleus [GO:0005634] cellular_component (1); ribosome biogenesis [GO:0042254] biological_process (1)                                                                                                                                                                                                                                                                                                     | AARP2CN [IPR012948] (1)                                                                                                                                                                                                                                                                                                                                                  | scaffold_8_mRNA_2354.1           | -                           | -                               |
| GF0032527 | 1                            | 0                       | 0                           | 0 Hypothetical protein (1)                                             |                                                                                                                                                                                                                                                                                                                                                                                                          |                                                                                                                                                                                                                                                                                                                                                                          | scaffold_8_mRNA_2353.1           | -                           | -                               |
| GF0032526 | 1                            | 0                       | 0                           | 0 Hypothetical protein (1)                                             |                                                                                                                                                                                                                                                                                                                                                                                                          | Leucine-rich repeat domain, L domain-like [IPR032675] (1)                                                                                                                                                                                                                                                                                                                | scaffold_8_mRNA_2350.1           | -                           | -                               |
| GF0032525 | 1                            | 0                       | 0                           | 0 Hypothetical protein (1)                                             |                                                                                                                                                                                                                                                                                                                                                                                                          |                                                                                                                                                                                                                                                                                                                                                                          | scaffold_8_mRNA_2349.1           | -                           | -                               |
| GF0032524 | 1                            | 0                       | 0                           | 0 LRR receptor-like kinase family protein (1)                          | protein phosphorylation [GO:0006468] biological_process (1); protein kinase activity [GO:0004672] molecular_function (1); ATP binding [GO:0005524] molecular_function (1); protein binding [GO:0005515] molecular_function (1)                                                                                                                                                                           | Protein kinase domain [IPR000739] (1); Leucine-rich repeat, typical subtype [IPR003591] (1); Protein kinase-like domain [IPR011009] (1); Leucine-rich repeat domain, L domain-like [IPR032675] (1); Tyrosine-protein kinase, active site [IPR008266] (1); Leucine-rich repeat [IPR001611] (1)                                                                            | scaffold_8_mRNA_2347.1           | -                           | -                               |
| GF0032523 | 1                            | 0                       | 0                           | 0 Putative non-LTR retroelement reverse transcriptase (1)              |                                                                                                                                                                                                                                                                                                                                                                                                          | Reverse transcriptase domain [IPR000477] (1)                                                                                                                                                                                                                                                                                                                             | scaffold_8_mRNA_2345.1           | -                           | -                               |
| GF0032522 | 1                            | 0                       | 0                           | 0 Polynucleotidyl transferase, Ribonuclease H fold (1)                 |                                                                                                                                                                                                                                                                                                                                                                                                          |                                                                                                                                                                                                                                                                                                                                                                          | scaffold_8_mRNA_2344.1           | -                           | -                               |
| GF0032521 | 1                            | 0                       | 0                           | 0 Hypothetical protein (1)                                             | metal ion binding [GO:0046872] molecular_function (1); superoxide metabolic process [GO:0006801] biological_process (1); oxidation-reduction process [GO:0055114] biological_process (1)                                                                                                                                                                                                                 | Superoxide dismutase, copper/zinc binding domain [IPR001424] (1)                                                                                                                                                                                                                                                                                                         | scaffold_8_mRNA_2340.1           | -                           | -                               |
| GF0032520 | 1                            | 0                       | 0                           | 0 Pathogenesis-related maize seed protein (1)                          | extracellular region [GO:0005576] cellular_component (1)                                                                                                                                                                                                                                                                                                                                                 | Cysteine-rich secretory protein, allergen V5/Tpx-1-related [IPR001283] (1); CAP domain [IPR014044] (1); Allergen V5/Tpx-1-related, conserved site [IPR018244] (1); Pathogenesis-related protein 1-like, SCP domain [IPR034111] (1)                                                                                                                                       | scaffold_8_mRNA_234.1            | -                           | -                               |
| GF0032519 | 1                            | 0                       | 0                           | 0 Squalene monooxygenase (1)                                           | extracellular region [GO:0005576] cellular_component (1); integral component of membrane [GO:0016021] cellular_component (1); squalene monooxygenase activity [GO:0004506] molecular_function (1); flavin adenine dinucleotide binding [GO:0050660] molecular_function (1); oxidation-reduction process [GO:0055114] biological_process (1); oxidoreductase activity [GO:0016491] molecular_function (1) | Allergen V5/Tpx-1-related, conserved site [IPR018244] (1); Squalene epoxidase [IPR013698] (1); ADENADRF-binding domain [IPR023753] (1); CAP domain [IPR014044] (1)                                                                                                                                                                                                       | scaffold_8_mRNA_233.1            | -                           | -                               |
| GF0032518 | 1                            | 0                       | 0                           | 0 Hypothetical protein (1)                                             |                                                                                                                                                                                                                                                                                                                                                                                                          |                                                                                                                                                                                                                                                                                                                                                                          | scaffold_8_mRNA_2328.1           | -                           | -                               |
| GF0032517 | 1                            | 0                       | 0                           | 0 Hypothetical protein (1)                                             |                                                                                                                                                                                                                                                                                                                                                                                                          |                                                                                                                                                                                                                                                                                                                                                                          | scaffold_8_mRNA_2324.1           | -                           | -                               |
| GF0032516 | 1                            | 0                       | 0                           | 0 B3 domain-containing transcription factor VRN1 (1)                   | DNA binding [GO:0003677] molecular_function (1)                                                                                                                                                                                                                                                                                                                                                          | DNA-binding pseudobarrel domain [IPR015300] (1); B3 DNA binding domain [IPR003340] (1)                                                                                                                                                                                                                                                                                   | scaffold_8_mRNA_2318.1           | -                           | -                               |
| GF0032515 | 1                            | 0                       | 0                           | 0 Hypothetical protein (1)                                             |                                                                                                                                                                                                                                                                                                                                                                                                          |                                                                                                                                                                                                                                                                                                                                                                          | scaffold_8_mRNA_2314.1           | -                           | -                               |
| GF0032514 | 1                            | 0                       | 0                           | 0 Egg cell-secreted protein 1.4 (1)                                    |                                                                                                                                                                                                                                                                                                                                                                                                          | Protein-like domain [IPR008502] (1)                                                                                                                                                                                                                                                                                                                                      | scaffold_8_mRNA_2310.1           | -                           | -                               |
| GF0032513 | 1                            | 0                       | 0                           | 0 Hypothetical protein (1)                                             |                                                                                                                                                                                                                                                                                                                                                                                                          |                                                                                                                                                                                                                                                                                                                                                                          | scaffold_8_mRNA_231.1            | -                           | -                               |
| GF0032512 | 1                            | 0                       | 0                           | 0 Hypothetical protein (1)                                             |                                                                                                                                                                                                                                                                                                                                                                                                          |                                                                                                                                                                                                                                                                                                                                                                          | scaffold_8_mRNA_2300.1           | -                           | -                               |
| GF0032511 | 1                            | 0                       | 0                           | 0 Hypothetical protein (1)                                             |                                                                                                                                                                                                                                                                                                                                                                                                          |                                                                                                                                                                                                                                                                                                                                                                          | scaffold_8_mRNA_2299.1           | -                           | -                               |
| GF0032510 | 1                            | 0                       | 0                           | 0 Hypothetical protein (1)                                             |                                                                                                                                                                                                                                                                                                                                                                                                          |                                                                                                                                                                                                                                                                                                                                                                          | scaffold_8_mRNA_2297.1           | -                           | -                               |
| GF0032509 | 1                            | 0                       | 0                           | 0 Hypothetical protein (1)                                             |                                                                                                                                                                                                                                                                                                                                                                                                          |                                                                                                                                                                                                                                                                                                                                                                          | scaffold_8_mRNA_2293.1           | -                           | -                               |
| GF0032508 | 1                            | 0                       | 0                           | 0 Hypothetical protein (1)                                             |                                                                                                                                                                                                                                                                                                                                                                                                          |                                                                                                                                                                                                                                                                                                                                                                          | scaffold_8_mRNA_2290.1           | -                           | -                               |
| GF0032507 | 1                            | 0                       | 0                           | 0 Hypothetical protein (1)                                             |                                                                                                                                                                                                                                                                                                                                                                                                          |                                                                                                                                                                                                                                                                                                                                                                          | scaffold_8_mRNA_2288.1           | -                           | -                               |
| GF0032506 | 1                            | 0                       | 0                           | 0 Hypothetical protein (1)                                             |                                                                                                                                                                                                                                                                                                                                                                                                          | Leucine-rich repeat-containing N-terminal, plant-type [IPR013210] (1); Leucine-rich repeat domain, L domain-like [IPR032675] (1)                                                                                                                                                                                                                                         | scaffold_8_mRNA_2280.1           | -                           | -                               |
| GF0032505 | 1                            | 0                       | 0                           | 0 Hypothetical protein (1)                                             |                                                                                                                                                                                                                                                                                                                                                                                                          |                                                                                                                                                                                                                                                                                                                                                                          | scaffold_8_mRNA_2277.1           | -                           | -                               |
| GF0032504 | 1                            | 0                       | 0                           | 0 Hypothetical protein (1)                                             |                                                                                                                                                                                                                                                                                                                                                                                                          |                                                                                                                                                                                                                                                                                                                                                                          | scaffold_8_mRNA_2269.1           | -                           | -                               |
| GF0032503 | 1                            | 0                       | 0                           | 0 Hypothetical protein (1)                                             |                                                                                                                                                                                                                                                                                                                                                                                                          |                                                                                                                                                                                                                                                                                                                                                                          | scaffold_8_mRNA_2265.1           | -                           | -                               |
| GF0032502 | 1                            | 0                       | 0                           | 0 Cytokinin riboside 5'-monophosphate phosphoribohydrolase (1)         |                                                                                                                                                                                                                                                                                                                                                                                                          | Cytokinin riboside 5'-monophosphate phosphoribohydrolase LOG [IPR005269] (1); LOG family [IPR031100] (1)                                                                                                                                                                                                                                                                 | scaffold_8_mRNA_2264.1           | -                           | -                               |
| GF0032501 | 1                            | 0                       | 0                           | 0 Hypothetical protein (1)                                             |                                                                                                                                                                                                                                                                                                                                                                                                          |                                                                                                                                                                                                                                                                                                                                                                          | scaffold_8_mRNA_2259.1           | -                           | -                               |
| GF0032500 | 1                            | 0                       | 0                           | 0 RNA-directed DNA polymerase (Reverse transcriptase) (1)              | nucleic acid binding [GO:0003676] molecular_function (1)                                                                                                                                                                                                                                                                                                                                                 | Reverse transcriptase domain [IPR000477] (1); Ribonuclease H-like domain [IPR012337] (1)                                                                                                                                                                                                                                                                                 | scaffold_8_mRNA_2254.1           | -                           | -                               |
| GF0032499 | 1                            | 0                       | 0                           | 0 Hypothetical protein (1)                                             |                                                                                                                                                                                                                                                                                                                                                                                                          |                                                                                                                                                                                                                                                                                                                                                                          | scaffold_8_mRNA_2246.1           | -                           | -                               |
| GF0032498 | 1                            | 0                       | 0                           | 0 Hypothetical protein (1)                                             |                                                                                                                                                                                                                                                                                                                                                                                                          | Alpha crystallin/Hsp20 domain [IPR02068] (1); HSP20-like chaperone [IPR008978] (1); Small heat shock protein HSP20 [IPR031107] (1)                                                                                                                                                                                                                                       | scaffold_8_mRNA_2235.1           | -                           | -                               |
| GF0032497 | 1                            | 0                       | 0                           | 0 Hypothetical protein (1)                                             |                                                                                                                                                                                                                                                                                                                                                                                                          |                                                                                                                                                                                                                                                                                                                                                                          | scaffold_8_mRNA_2233.1           | -                           | -                               |
| GF0032496 | 1                            | 0                       | 0                           | 0 Hypothetical protein (1)                                             |                                                                                                                                                                                                                                                                                                                                                                                                          |                                                                                                                                                                                                                                                                                                                                                                          | scaffold_8_mRNA_2232.1           | -                           | -                               |
| GF0032495 | 1                            | 0                       | 0                           | 0 Hypothetical protein (1)                                             |                                                                                                                                                                                                                                                                                                                                                                                                          |                                                                                                                                                                                                                                                                                                                                                                          | scaffold_8_mRNA_2229.1           | -                           | -                               |
| GF0032494 | 1                            | 0                       | 0                           | 0 Hypothetical protein (1)                                             |                                                                                                                                                                                                                                                                                                                                                                                                          |                                                                                                                                                                                                                                                                                                                                                                          | scaffold_8_mRNA_2225.1           | -                           | -                               |
| GF0032493 | 1                            | 0                       | 0                           | 0 Hypothetical protein (1)                                             |                                                                                                                                                                                                                                                                                                                                                                                                          |                                                                                                                                                                                                                                                                                                                                                                          | scaffold_8_mRNA_2216.1           | -                           | -                               |
| GF0032492 | 1                            | 0                       | 0                           | 0 Hypothetical protein (1)                                             |                                                                                                                                                                                                                                                                                                                                                                                                          |                                                                                                                                                                                                                                                                                                                                                                          | scaffold_8_mRNA_2213.1           | -                           | -                               |
| GF0032491 | 1                            | 0                       | 0                           | 0 Hypothetical protein (1)                                             |                                                                                                                                                                                                                                                                                                                                                                                                          |                                                                                                                                                                                                                                                                                                                                                                          | scaffold_8_mRNA_2212.1           | -                           | -                               |
| GF0032490 | 1                            | 0                       | 0                           | 0 Hypothetical protein (1)                                             |                                                                                                                                                                                                                                                                                                                                                                                                          |                                                                                                                                                                                                                                                                                                                                                                          | scaffold_8_mRNA_2207.1           | -                           | -                               |
| GF0032489 | 1                            | 0                       | 0                           | 0 Hypothetical protein (1)                                             | protein dimerization activity [GO:0046983] molecular_function (1); nucleic acid binding [GO:0003676] molecular_function (1)                                                                                                                                                                                                                                                                              | Ribonuclease H-like domain [IPR012337] (1); HAT, C-terminal dimerisation domain [IPR008906] (1)                                                                                                                                                                                                                                                                          | scaffold_8_mRNA_2199.1           | -                           | -                               |
| GF0032488 | 1                            | 0                       | 0                           | 0 Hypothetical protein (1)                                             | protein dimerization activity [GO:0046983] molecular_function (1); nucleic acid binding [GO:0003676] molecular_function (1)                                                                                                                                                                                                                                                                              | HAT, C-terminal dimerisation domain [IPR008906] (1); Ribonuclease H-like domain [IPR012337] (1)                                                                                                                                                                                                                                                                          | scaffold_8_mRNA_2195.1           | -                           | -                               |
| GF0032487 | 1                            | 0                       | 0                           | 0 Hypothetical protein (1)                                             |                                                                                                                                                                                                                                                                                                                                                                                                          |                                                                                                                                                                                                                                                                                                                                                                          | scaffold_8_mRNA_2190.1           | -                           | -                               |
| GF0032486 | 1                            | 0                       | 0                           | 0 Non-LTR retroelement reverse transcriptase-like (1)                  | nucleic acid binding [GO:0003676] molecular_function (1); RNA-DNA hybrid ribonuclease activity [GO:0004523] molecular_function (1)                                                                                                                                                                                                                                                                       | TB2/DPI1/HVA22-related protein [IPR004345] (1); Ribonuclease H domain [IPR02136] (1); Reverse transcriptase zinc-binding domain [IPR026960] (1); Ribonuclease H-like domain [IPR012337] (1)                                                                                                                                                                              | scaffold_8_mRNA_2183.1           | -                           | -                               |
| GF0032485 | 1                            | 0                       | 0                           | 0 Hypothetical protein (1)                                             |                                                                                                                                                                                                                                                                                                                                                                                                          |                                                                                                                                                                                                                                                                                                                                                                          | scaffold_8_mRNA_2179.1           | -                           | -                               |
| GF0032484 | 1                            | 0                       | 0                           | 0 Hypothetical protein (1)                                             | nucleic acid binding [GO:0003676] molecular_function (1)                                                                                                                                                                                                                                                                                                                                                 | Ribonuclease H-like domain [IPR012337] (1); Retrotransposon gag domain [IPR005162] (1)                                                                                                                                                                                                                                                                                   | scaffold_8_mRNA_2177.1           | -                           | -                               |
| GF0032483 | 1                            | 0                       | 0                           | 0 Monosaccharide transport protein (1)                                 |                                                                                                                                                                                                                                                                                                                                                                                                          |                                                                                                                                                                                                                                                                                                                                                                          | scaffold_8_mRNA_2175.1           | -                           | -                               |
| GF0032482 | 1                            | 0                       | 0                           | 0 Hypothetical protein (1)                                             |                                                                                                                                                                                                                                                                                                                                                                                                          |                                                                                                                                                                                                                                                                                                                                                                          | scaffold_8_mRNA_2174.1           | -                           | -                               |
| GF0032481 | 1                            | 0                       | 0                           | 0 Hypothetical protein (1)                                             |                                                                                                                                                                                                                                                                                                                                                                                                          |                                                                                                                                                                                                                                                                                                                                                                          | scaffold_8_mRNA_2170.1           | -                           | -                               |
| GF0032480 | 1                            | 0                       | 0                           | 0 Hypothetical protein (1)                                             |                                                                                                                                                                                                                                                                                                                                                                                                          |                                                                                                                                                                                                                                                                                                                                                                          | scaffold_8_mRNA_2168.1           | -                           | -                               |
| GF0032479 | 1                            | 0                       | 0                           | 0 Hypothetical protein (1)                                             |                                                                                                                                                                                                                                                                                                                                                                                                          |                                                                                                                                                                                                                                                                                                                                                                          | scaffold_8_mRNA_2167.1           | -                           | -                               |
| GF0032478 | 1                            | 0                       | 0                           | 0 Hypothetical protein (1)                                             |                                                                                                                                                                                                                                                                                                                                                                                                          |                                                                                                                                                                                                                                                                                                                                                                          | scaffold_8_mRNA_2157.1           | -                           | -                               |

| ID        | Num in <i>C. clementiae</i> | Num in <i>C. uchiha</i> | Num in <i>P. trifoliata</i> | Note                                                           | GO                                                                                                                                                                           | InterPro                                                                                                                                                                                                                      | Members in <i>C. clementiae</i> | Members in <i>C. uchiha</i> | Members in <i>P. trifoliata</i> |
|-----------|-----------------------------|-------------------------|-----------------------------|----------------------------------------------------------------|------------------------------------------------------------------------------------------------------------------------------------------------------------------------------|-------------------------------------------------------------------------------------------------------------------------------------------------------------------------------------------------------------------------------|---------------------------------|-----------------------------|---------------------------------|
| GF0032477 | 1                           | 0                       | 0                           | 0 Hypothetical protein (1)                                     | protein dimerization activity [GO:0046983 molecular_function] (1); nucleic acid binding [GO:0003676 molecular_function] (1); DNA binding [GO:0003677 molecular_function] (1) | Ribonuclease H-like domain [IPRO12337] (1); Zinc finger C2H2-type [IPRO13087] (1); Zinc finger, BED-type [IPRO03656] (1); HAT, C-terminal dimerisation domain [IPRO08906] (1)                                                 | scaffold_8_mRNA_2156.1          | -                           | -                               |
| GF0032476 | 1                           | 0                       | 0                           | 0 Hypothetical protein (1)                                     |                                                                                                                                                                              |                                                                                                                                                                                                                               | scaffold_8_mRNA_2143.1          | -                           | -                               |
| GF0032475 | 1                           | 0                       | 0                           | 0 Hypothetical protein (1)                                     |                                                                                                                                                                              |                                                                                                                                                                                                                               | scaffold_8_mRNA_2136.1          | -                           | -                               |
| GF0032474 | 1                           | 0                       | 0                           | 0 Monosaccharide transport protein (1)                         |                                                                                                                                                                              |                                                                                                                                                                                                                               | scaffold_8_mRNA_2126.1          | -                           | -                               |
| GF0032473 | 1                           | 0                       | 0                           | 0 Hypothetical protein (1)                                     |                                                                                                                                                                              |                                                                                                                                                                                                                               | scaffold_8_mRNA_2125.1          | -                           | -                               |
| GF0032472 | 1                           | 0                       | 0                           | 0 Monosaccharide transport protein (1)                         |                                                                                                                                                                              |                                                                                                                                                                                                                               | scaffold_8_mRNA_2122.1          | -                           | -                               |
| GF0032471 | 1                           | 0                       | 0                           | 0 Hypothetical protein (1)                                     |                                                                                                                                                                              |                                                                                                                                                                                                                               | scaffold_8_mRNA_2119.1          | -                           | -                               |
| GF0032470 | 1                           | 0                       | 0                           | 0 Hypothetical protein (1)                                     |                                                                                                                                                                              |                                                                                                                                                                                                                               | scaffold_8_mRNA_2118.1          | -                           | -                               |
| GF0032469 | 1                           | 0                       | 0                           | 0 Hypothetical protein (1)                                     |                                                                                                                                                                              | Retrotransposon gag domain [IPRO05162] (1)                                                                                                                                                                                    | scaffold_8_mRNA_2117.1          | -                           | -                               |
| GF0032468 | 1                           | 0                       | 0                           | 0 Hypothetical protein (1)                                     |                                                                                                                                                                              |                                                                                                                                                                                                                               | scaffold_8_mRNA_2113.1          | -                           | -                               |
| GF0032467 | 1                           | 0                       | 0                           | 0 Hypothetical protein (1)                                     |                                                                                                                                                                              |                                                                                                                                                                                                                               | scaffold_8_mRNA_2109.1          | -                           | -                               |
| GF0032466 | 1                           | 0                       | 0                           | 0 Cytokinin riboside 5'-monophosphate phosphoribohydrolase (1) |                                                                                                                                                                              | LOG family [IPRO31100] (1)                                                                                                                                                                                                    | scaffold_8_mRNA_2108.1          | -                           | -                               |
| GF0032465 | 1                           | 0                       | 0                           | 0 Hypothetical protein (1)                                     |                                                                                                                                                                              |                                                                                                                                                                                                                               | scaffold_8_mRNA_2107.1          | -                           | -                               |
| GF0032464 | 1                           | 0                       | 0                           | 0 Hypothetical protein (1)                                     |                                                                                                                                                                              |                                                                                                                                                                                                                               | scaffold_8_mRNA_2106.1          | -                           | -                               |
| GF0032463 | 1                           | 0                       | 0                           | 0 Hypothetical protein (1)                                     |                                                                                                                                                                              |                                                                                                                                                                                                                               | scaffold_8_mRNA_2103.1          | -                           | -                               |
| GF0032462 | 1                           | 0                       | 0                           | 0 Hypothetical protein (1)                                     |                                                                                                                                                                              | Retrotransposon gag domain [IPRO05162] (1)                                                                                                                                                                                    | scaffold_8_mRNA_2102.1          | -                           | -                               |
| GF0032461 | 1                           | 0                       | 0                           | 0 Hypothetical protein (1)                                     |                                                                                                                                                                              |                                                                                                                                                                                                                               | scaffold_8_mRNA_2099.1          | -                           | -                               |
| GF0032460 | 1                           | 0                       | 0                           | 0 Hypothetical protein (1)                                     |                                                                                                                                                                              |                                                                                                                                                                                                                               | scaffold_8_mRNA_2097.1          | -                           | -                               |
| GF0032459 | 1                           | 0                       | 0                           | 0 Hypothetical protein (1)                                     |                                                                                                                                                                              |                                                                                                                                                                                                                               | scaffold_8_mRNA_2092.1          | -                           | -                               |
| GF0032458 | 1                           | 0                       | 0                           | 0 Hypothetical protein (1)                                     |                                                                                                                                                                              |                                                                                                                                                                                                                               | scaffold_8_mRNA_2091.1          | -                           | -                               |
| GF0032457 | 1                           | 0                       | 0                           | 0 Hypothetical protein (1)                                     |                                                                                                                                                                              | Domain of unknown function DUF1985 [IPRO15410] (1)                                                                                                                                                                            | scaffold_8_mRNA_209.1           | -                           | -                               |
| GF0032456 | 1                           | 0                       | 0                           | 0 Cytokinin riboside 5'-monophosphate phosphoribohydrolase (1) |                                                                                                                                                                              | LOG family [IPRO31100] (1)                                                                                                                                                                                                    | scaffold_8_mRNA_2087.1          | -                           | -                               |
| GF0032455 | 1                           | 0                       | 0                           | 0 Hypothetical protein (1)                                     |                                                                                                                                                                              |                                                                                                                                                                                                                               | scaffold_8_mRNA_2086.1          | -                           | -                               |
| GF0032454 | 1                           | 0                       | 0                           | 0 Hypothetical protein (1)                                     |                                                                                                                                                                              |                                                                                                                                                                                                                               | scaffold_8_mRNA_2084.1          | -                           | -                               |
| GF0032453 | 1                           | 0                       | 0                           | 0 Hypothetical protein (1)                                     |                                                                                                                                                                              |                                                                                                                                                                                                                               | scaffold_8_mRNA_2073.1          | -                           | -                               |
| GF0032452 | 1                           | 0                       | 0                           | 0 BED zinc finger, HAT family dimerization domain (1)          | nucleic acid binding [GO:0003676 molecular_function] (1); DNA binding [GO:0003677 molecular_function] (1)                                                                    | Ribonuclease H-like domain [IPRO12337] (1); Zinc finger C2H2-type [IPRO13087] (1); Zinc finger, BED-type [IPRO03656] (1)                                                                                                      | scaffold_8_mRNA_2072.1          | -                           | -                               |
| GF0032451 | 1                           | 0                       | 0                           | 0 Hypothetical protein (1)                                     |                                                                                                                                                                              |                                                                                                                                                                                                                               | scaffold_8_mRNA_2071.1          | -                           | -                               |
| GF0032450 | 1                           | 0                       | 0                           | 0 Hypothetical protein (1)                                     |                                                                                                                                                                              |                                                                                                                                                                                                                               | scaffold_8_mRNA_2070.1          | -                           | -                               |
| GF0032449 | 1                           | 0                       | 0                           | 0 Hypothetical protein (1)                                     |                                                                                                                                                                              |                                                                                                                                                                                                                               | scaffold_8_mRNA_2069.1          | -                           | -                               |
| GF0032448 | 1                           | 0                       | 0                           | 0 Hypothetical protein (1)                                     |                                                                                                                                                                              |                                                                                                                                                                                                                               | scaffold_8_mRNA_2066.1          | -                           | -                               |
| GF0032447 | 1                           | 0                       | 0                           | 0 Hypothetical protein (1)                                     |                                                                                                                                                                              |                                                                                                                                                                                                                               | scaffold_8_mRNA_2062.1          | -                           | -                               |
| GF0032446 | 1                           | 0                       | 0                           | 0 Hypothetical protein (1)                                     |                                                                                                                                                                              |                                                                                                                                                                                                                               | scaffold_8_mRNA_2059.1          | -                           | -                               |
| GF0032445 | 1                           | 0                       | 0                           | 0 Hypothetical protein (1)                                     |                                                                                                                                                                              |                                                                                                                                                                                                                               | scaffold_8_mRNA_2058.1          | -                           | -                               |
| GF0032444 | 1                           | 0                       | 0                           | 0 Transposable element protein, putative, (1)                  |                                                                                                                                                                              | Retrotransposon gag domain [IPRO05162] (1)                                                                                                                                                                                    | scaffold_8_mRNA_2054.1          | -                           | -                               |
| GF0032443 | 1                           | 0                       | 0                           | 0 Hypothetical protein (1)                                     |                                                                                                                                                                              | Retrotransposon gag domain [IPRO05162] (1)                                                                                                                                                                                    | scaffold_8_mRNA_2053.1          | -                           | -                               |
| GF0032442 | 1                           | 0                       | 0                           | 0 Cytokinin riboside 5'-monophosphate phosphoribohydrolase (1) |                                                                                                                                                                              | LOG family [IPRO31100] (1)                                                                                                                                                                                                    | scaffold_8_mRNA_2052.1          | -                           | -                               |
| GF0032441 | 1                           | 0                       | 0                           | 0 Hypothetical protein (1)                                     |                                                                                                                                                                              |                                                                                                                                                                                                                               | scaffold_8_mRNA_2051.1          | -                           | -                               |
| GF0032440 | 1                           | 0                       | 0                           | 0 Hypothetical protein (1)                                     |                                                                                                                                                                              |                                                                                                                                                                                                                               | scaffold_8_mRNA_2048.1          | -                           | -                               |
| GF0032439 | 1                           | 0                       | 0                           | 0 Hypothetical protein (1)                                     |                                                                                                                                                                              | Viral movement protein [IPRO28919] (1)                                                                                                                                                                                        | scaffold_8_mRNA_2047.1          | -                           | -                               |
| GF0032438 | 1                           | 0                       | 0                           | 0 Hypothetical protein (1)                                     |                                                                                                                                                                              |                                                                                                                                                                                                                               | scaffold_8_mRNA_2046.1          | -                           | -                               |
| GF0032437 | 1                           | 0                       | 0                           | 0 Hypothetical protein (1)                                     |                                                                                                                                                                              |                                                                                                                                                                                                                               | scaffold_8_mRNA_2045.1          | -                           | -                               |
| GF0032436 | 1                           | 0                       | 0                           | 0 Hypothetical protein (1)                                     |                                                                                                                                                                              |                                                                                                                                                                                                                               | scaffold_8_mRNA_2042.1          | -                           | -                               |
| GF0032435 | 1                           | 0                       | 0                           | 0 Hypothetical protein (1)                                     |                                                                                                                                                                              |                                                                                                                                                                                                                               | scaffold_8_mRNA_2030.1          | -                           | -                               |
| GF0032434 | 1                           | 0                       | 0                           | 0 Hypothetical protein (1)                                     |                                                                                                                                                                              |                                                                                                                                                                                                                               | scaffold_8_mRNA_2029.1          | -                           | -                               |
| GF0032433 | 1                           | 0                       | 0                           | 0 Cytokinin riboside 5'-monophosphate phosphoribohydrolase (1) |                                                                                                                                                                              |                                                                                                                                                                                                                               | scaffold_8_mRNA_2027.1          | -                           | -                               |
| GF0032432 | 1                           | 0                       | 0                           | 0 Hypothetical protein (1)                                     |                                                                                                                                                                              |                                                                                                                                                                                                                               | scaffold_8_mRNA_2026.1          | -                           | -                               |
| GF0032431 | 1                           | 0                       | 0                           | 0 Hypothetical protein (1)                                     |                                                                                                                                                                              |                                                                                                                                                                                                                               | scaffold_8_mRNA_2024.1          | -                           | -                               |
| GF0032430 | 1                           | 0                       | 0                           | 0 Integrase (1)                                                |                                                                                                                                                                              | Aspartic peptidase domain [IPRO21109] (1); LOG family [IPRO31100] (1)                                                                                                                                                         | scaffold_8_mRNA_2022.1          | -                           | -                               |
| GF0032429 | 1                           | 0                       | 0                           | 0 Cytokinin riboside 5'-monophosphate phosphoribohydrolase (1) |                                                                                                                                                                              | Cytokinin riboside 5'-monophosphate phosphoribohydrolase LOG [IPRO05269] (1); LOG family [IPRO31100] (1)                                                                                                                      | scaffold_8_mRNA_2019.1          | -                           | -                               |
| GF0032428 | 1                           | 0                       | 0                           | 0 Hypothetical protein (1)                                     |                                                                                                                                                                              |                                                                                                                                                                                                                               | scaffold_8_mRNA_2018.1          | -                           | -                               |
| GF0032427 | 1                           | 0                       | 0                           | 0 Retrotransposon gag protein (1)                              |                                                                                                                                                                              | Retrotransposon gag domain [IPRO05162] (1)                                                                                                                                                                                    | scaffold_8_mRNA_2017.1          | -                           | -                               |
| GF0032426 | 1                           | 0                       | 0                           | 0 Hypothetical protein (1)                                     |                                                                                                                                                                              |                                                                                                                                                                                                                               | scaffold_8_mRNA_2011.1          | -                           | -                               |
| GF0032425 | 1                           | 0                       | 0                           | 0 Hypothetical protein (1)                                     |                                                                                                                                                                              |                                                                                                                                                                                                                               | scaffold_8_mRNA_2009.1          | -                           | -                               |
| GF0032424 | 1                           | 0                       | 0                           | 0 Caffeic acid 3-O-methyltransferase (1)                       | O-methyltransferase activity [GO:0008171 molecular_function] (1); methyltransferase activity [GO:0008168 molecular_function] (1)                                             | S-adenosyl-L-methionine-dependent methyltransferase [IPRO29063] (1); O-methyltransferase, family 2 [IPRO01077] (1); Winged helix-turn-helix DNA-binding domain [IPRO11991] (1); O-methyltransferase COMT-type [IPRO16461] (1) | scaffold_8_mRNA_2006.1          | -                           | -                               |
| GF0032423 | 1                           | 0                       | 0                           | 0 Hypothetical protein (1)                                     |                                                                                                                                                                              |                                                                                                                                                                                                                               | scaffold_8_mRNA_2005.1          | -                           | -                               |
| GF0032422 | 1                           | 0                       | 0                           | 0 Chromo domain protein (1)                                    |                                                                                                                                                                              | Chromo domain-like [IPRO16197] (1); Chromo domain [IPRO23780] (1); Retrotransposon gag domain [IPRO05162] (1)                                                                                                                 | scaffold_8_mRNA_2004.1          | -                           | -                               |
| GF0032421 | 1                           | 0                       | 0                           | 0 Hypothetical protein (1)                                     |                                                                                                                                                                              |                                                                                                                                                                                                                               | scaffold_8_mRNA_1999.1          | -                           | -                               |
| GF0032420 | 1                           | 0                       | 0                           | 0 Hypothetical protein (1)                                     | aspartic-type endopeptidase activity [GO:0004190 molecular_function] (1); proteolysis [GO:0006508 biological_process] (1)                                                    | Retroviral aspartyl protease [IPRO13242] (1); Aspartic peptidase domain [IPRO21109] (1); Aspartic peptidase, active site [IPRO01969] (1)                                                                                      | scaffold_8_mRNA_1996.1          | -                           | -                               |
| GF0032419 | 1                           | 0                       | 0                           | 0 Cytokinin riboside 5'-monophosphate phosphoribohydrolase (1) |                                                                                                                                                                              |                                                                                                                                                                                                                               | scaffold_8_mRNA_1991.1          | -                           | -                               |
| GF0032418 | 1                           | 0                       | 0                           | 0 Hypothetical protein (1)                                     |                                                                                                                                                                              |                                                                                                                                                                                                                               | scaffold_8_mRNA_199.1           | -                           | -                               |
| GF0032417 | 1                           | 0                       | 0                           | 0 Hypothetical protein (1)                                     |                                                                                                                                                                              |                                                                                                                                                                                                                               | scaffold_8_mRNA_1987.1          | -                           | -                               |
| GF0032416 | 1                           | 0                       | 0                           | 0 Hypothetical protein (1)                                     |                                                                                                                                                                              |                                                                                                                                                                                                                               | scaffold_8_mRNA_1983.1          | -                           | -                               |
| GF0032415 | 1                           | 0                       | 0                           | 0 Hypothetical protein (1)                                     |                                                                                                                                                                              |                                                                                                                                                                                                                               | scaffold_8_mRNA_1982.1          | -                           | -                               |
| GF0032414 | 1                           | 0                       | 0                           | 0 Hypothetical protein (1)                                     |                                                                                                                                                                              |                                                                                                                                                                                                                               | scaffold_8_mRNA_1981.1          | -                           | -                               |
| GF0032413 | 1                           | 0                       | 0                           | 0 Hypothetical protein (1)                                     |                                                                                                                                                                              |                                                                                                                                                                                                                               | scaffold_8_mRNA_1979.1          | -                           | -                               |
| GF0032412 | 1                           | 0                       | 0                           | 0 Hypothetical protein (1)                                     |                                                                                                                                                                              |                                                                                                                                                                                                                               | scaffold_8_mRNA_1975.1          | -                           | -                               |
| GF0032411 | 1                           | 0                       | 0                           | 0 Hypothetical protein (1)                                     |                                                                                                                                                                              |                                                                                                                                                                                                                               | scaffold_8_mRNA_1971.1          | -                           | -                               |
| GF0032410 | 1                           | 0                       | 0                           | 0 Hypothetical protein (1)                                     |                                                                                                                                                                              |                                                                                                                                                                                                                               | scaffold_8_mRNA_1965.1          | -                           | -                               |
| GF0032409 | 1                           | 0                       | 0                           | 0 Hypothetical protein (1)                                     |                                                                                                                                                                              |                                                                                                                                                                                                                               | scaffold_8_mRNA_1961.1          | -                           | -                               |
| GF0032408 | 1                           | 0                       | 0                           | 0 Hypothetical protein (1)                                     |                                                                                                                                                                              |                                                                                                                                                                                                                               | scaffold_8_mRNA_1960.1          | -                           | -                               |
| GF0032407 | 1                           | 0                       | 0                           | 0 Retrotransposon protein, putative, Ty3-gypsy subclass (1)    |                                                                                                                                                                              | Aspartic peptidase domain [IPRO21109] (1)                                                                                                                                                                                     | scaffold_8_mRNA_1956.1          | -                           | -                               |
| GF0032406 | 1                           | 0                       | 0                           | 0 Hypothetical protein (1)                                     |                                                                                                                                                                              |                                                                                                                                                                                                                               | scaffold_8_mRNA_1954.1          | -                           | -                               |
| GF0032405 | 1                           | 0                       | 0                           | 0 Hypothetical protein (1)                                     |                                                                                                                                                                              |                                                                                                                                                                                                                               | scaffold_8_mRNA_1953.1          | -                           | -                               |
| GF0032404 | 1                           | 0                       | 0                           | 0 Hypothetical protein (1)                                     |                                                                                                                                                                              |                                                                                                                                                                                                                               | scaffold_8_mRNA_1951.1          | -                           | -                               |
| GF0032403 | 1                           | 0                       | 0                           | 0 Hypothetical protein (1)                                     | nucleic acid binding [GO:0003676 molecular_function] (1)                                                                                                                     | Ribonuclease H-like domain [IPRO12337] (1)                                                                                                                                                                                    | scaffold_8_mRNA_1950.1          | -                           | -                               |
| GF0032402 | 1                           | 0                       | 0                           | 0 Hypothetical protein (1)                                     |                                                                                                                                                                              |                                                                                                                                                                                                                               | scaffold_8_mRNA_1946.1          | -                           | -                               |
| GF0032401 | 1                           | 0                       | 0                           | 0 Hypothetical protein (1)                                     |                                                                                                                                                                              |                                                                                                                                                                                                                               | scaffold_8_mRNA_1943.1          | -                           | -                               |
| GF0032400 | 1                           | 0                       | 0                           | 0 Hypothetical protein (1)                                     |                                                                                                                                                                              | Retroviral aspartyl protease [IPRO13242] (1); Aspartic peptidase domain [IPRO21109] (1)                                                                                                                                       | scaffold_8_mRNA_1939.1          | -                           | -                               |
| GF0032399 | 1                           | 0                       | 0                           | 0 Hypothetical protein (1)                                     |                                                                                                                                                                              |                                                                                                                                                                                                                               | scaffold_8_mRNA_1938.1          | -                           | -                               |
| GF0032398 | 1                           | 0                       | 0                           | 0 Hypothetical protein (1)                                     |                                                                                                                                                                              |                                                                                                                                                                                                                               | scaffold_8_mRNA_1937.1          | -                           | -                               |
| GF0032397 | 1                           | 0                       | 0                           | 0 Hypothetical protein (1)                                     |                                                                                                                                                                              |                                                                                                                                                                                                                               | scaffold_8_mRNA_1936.1          | -                           | -                               |
| GF0032396 | 1                           | 0                       | 0                           | 0 Hypothetical protein (1)                                     |                                                                                                                                                                              |                                                                                                                                                                                                                               | scaffold_8_mRNA_1935.1          | -                           | -                               |
| GF0032395 | 1                           | 0                       | 0                           | 0 Hypothetical protein (1)                                     |                                                                                                                                                                              |                                                                                                                                                                                                                               | scaffold_8_mRNA_1931.1          | -                           | -                               |
| GF0032394 | 1                           | 0                       | 0                           | 0 Hypothetical protein (1)                                     | nucleic acid binding [GO:0003676 molecular_function] (1)                                                                                                                     | Ribonuclease H-like domain [IPRO12337] (1)                                                                                                                                                                                    | scaffold_8_mRNA_1928.1          | -                           | -                               |
| GF0032393 | 1                           | 0                       | 0                           | 0 Hypothetical protein (1)                                     |                                                                                                                                                                              |                                                                                                                                                                                                                               | scaffold_8_mRNA_1927.1          | -                           | -                               |
| GF0032392 | 1                           | 0                       | 0                           | 0 Cytokinin riboside 5'-monophosphate phosphoribohydrolase (1) |                                                                                                                                                                              | LOG family [IPRO31100] (1)                                                                                                                                                                                                    | scaffold_8_mRNA_1926.1          | -                           | -                               |

| ID        | Num. in <i>C. clementiae</i> | Num. in <i>C. uchiha</i> | Num. in <i>P. trifoliata</i> | Note                                                             | GO                                                                                                                                                                                                                                                                                                                                                                                                                       | InterPro                                                                                                                                                                                                                                                                                        | Members in <i>C. clementiae</i> | Members in <i>C. uchiha</i> | Members in <i>P. trifoliata</i> |
|-----------|------------------------------|--------------------------|------------------------------|------------------------------------------------------------------|--------------------------------------------------------------------------------------------------------------------------------------------------------------------------------------------------------------------------------------------------------------------------------------------------------------------------------------------------------------------------------------------------------------------------|-------------------------------------------------------------------------------------------------------------------------------------------------------------------------------------------------------------------------------------------------------------------------------------------------|---------------------------------|-----------------------------|---------------------------------|
| GF0032391 | 1                            | 0                        | 0                            | Probable xyloglucan 0 endotransglucosylase/hydrolase protein (1) | xyloglucan:xyloglucosyl transferase activity [GO:0016762]<br>molecular_function (1); carbohydrate metabolic process [GO:0005975 biological_process] (1); hydrolase activity, hydrolyzing O-glycosyl B components [GO:0040553 molecular_function] (1); cell wall [GO:0005618 cellular_component] (1); cellular glucan metabolic process [GO:0006073 biological_process] (1); apoplast [GO:0048046 cellular_component] (1) | Concanavalin A-like lectin:glucanase domain [IPRO13320] (1); Glycoside hydrolase, family 16, active site [IPRO08263] (1); Protein of unknown function DUF241, plant [IPRO04320] (1); Xyloglucan endo-1,4-glycosylase, C-terminal [IPRO10713] (1); Glycoside hydrolase family 16 [IPRO00757] (1) | scaffold_8_mRNA_1924.1          | -                           | -                               |
| GF0032390 | 1                            | 0                        | 0                            | 0 Hypothetical protein (1)                                       | zinc ion binding [GO:0008270 molecular_function] (1); aspartic-type endopeptidase activity [GO:0004190 molecular_function] (1); nucleic acid binding [GO:0003676 molecular_function] (1); protolysis [GO:0006508 biological_process] (1)                                                                                                                                                                                 | Retropopsins [IPRO18061] (1); Aspartic peptidase, active site [IPRO01969] (1); Aspartic peptidase domain [IPRO21109] (1); Zinc finger, CCHC-type [IPRO01878] (1)                                                                                                                                | scaffold_8_mRNA_1923.1          | -                           | -                               |
| GF0032389 | 1                            | 0                        | 0                            | 0 Hypothetical protein (1)                                       | zinc ion binding [GO:0008270 molecular_function] (1); nucleic acid binding [GO:0003676 molecular_function] (1)                                                                                                                                                                                                                                                                                                           | Zinc finger, CCHC-type [IPRO01878] (1)                                                                                                                                                                                                                                                          | scaffold_8_mRNA_1922.1          | -                           | -                               |
| GF0032388 | 1                            | 0                        | 0                            | 0 Hypothetical protein (1)                                       | zinc ion binding [GO:0008270 molecular_function] (1); nucleic acid binding [GO:0003676 molecular_function] (1)                                                                                                                                                                                                                                                                                                           | Zinc finger, CCHC-type [IPRO01878] (1)                                                                                                                                                                                                                                                          | scaffold_8_mRNA_1920.1          | -                           | -                               |
| GF0032387 | 1                            | 0                        | 0                            | 0 Hypothetical protein (1)                                       | zinc ion binding [GO:0008270 molecular_function] (1); nucleic acid binding [GO:0003676 molecular_function] (1)                                                                                                                                                                                                                                                                                                           | Zinc finger, CCHC-type [IPRO01878] (1)                                                                                                                                                                                                                                                          | scaffold_8_mRNA_1919.1          | -                           | -                               |
| GF0032386 | 1                            | 0                        | 0                            | 0 Hypothetical protein (1)                                       | zinc ion binding [GO:0008270 molecular_function] (1); nucleic acid binding [GO:0003676 molecular_function] (1)                                                                                                                                                                                                                                                                                                           | Zinc finger, CCHC-type [IPRO01878] (1)                                                                                                                                                                                                                                                          | scaffold_8_mRNA_1917.1          | -                           | -                               |
| GF0032385 | 1                            | 0                        | 0                            | 0 Hypothetical protein (1)                                       | zinc ion binding [GO:0008270 molecular_function] (1); nucleic acid binding [GO:0003676 molecular_function] (1)                                                                                                                                                                                                                                                                                                           | Zinc finger, CCHC-type [IPRO01878] (1)                                                                                                                                                                                                                                                          | scaffold_8_mRNA_1916.1          | -                           | -                               |
| GF0032384 | 1                            | 0                        | 0                            | 0 Hypothetical protein (1)                                       | zinc ion binding [GO:0008270 molecular_function] (1); nucleic acid binding [GO:0003676 molecular_function] (1)                                                                                                                                                                                                                                                                                                           | Zinc finger, CCHC-type [IPRO01878] (1)                                                                                                                                                                                                                                                          | scaffold_8_mRNA_1915.1          | -                           | -                               |
| GF0032383 | 1                            | 0                        | 0                            | 0 Hypothetical protein (1)                                       |                                                                                                                                                                                                                                                                                                                                                                                                                          |                                                                                                                                                                                                                                                                                                 | scaffold_8_mRNA_1912.1          | -                           | -                               |
| GF0032382 | 1                            | 0                        | 0                            | 0 Hypothetical protein (1)                                       |                                                                                                                                                                                                                                                                                                                                                                                                                          |                                                                                                                                                                                                                                                                                                 | scaffold_8_mRNA_1909.1          | -                           | -                               |
| GF0032381 | 1                            | 0                        | 0                            | 0 Cytokinin riboside 5'-monophosphate phosphoribohydrolase (1)   |                                                                                                                                                                                                                                                                                                                                                                                                                          | LOG family [IPRO31100] (1)                                                                                                                                                                                                                                                                      | scaffold_8_mRNA_1908.1          | -                           | -                               |
| GF0032380 | 1                            | 0                        | 0                            | 0 Hypothetical protein (1)                                       |                                                                                                                                                                                                                                                                                                                                                                                                                          |                                                                                                                                                                                                                                                                                                 | scaffold_8_mRNA_1902.1          | -                           | -                               |
| GF0032379 | 1                            | 0                        | 0                            | 0 Cytokinin riboside 5'-monophosphate phosphoribohydrolase (1)   |                                                                                                                                                                                                                                                                                                                                                                                                                          | LOG family [IPRO31100] (1); Cytokinin riboside 5'-monophosphate phosphoribohydrolase LOG [IPRO05269] (1)                                                                                                                                                                                        | scaffold_8_mRNA_1901.1          | -                           | -                               |
| GF0032378 | 1                            | 0                        | 0                            | 0 Hypothetical protein (1)                                       | regulation of transcription, DNA-templated [GO:0006355 biological_process] (1); nucleic acid binding [GO:0003676 molecular_function] (1)                                                                                                                                                                                                                                                                                 | Carlavirus nucleic acid-binding protein [IPRO02568] (1)                                                                                                                                                                                                                                         | scaffold_8_mRNA_1900.1          | -                           | -                               |
| GF0032377 | 1                            | 0                        | 0                            | 0 Hypothetical protein (1)                                       | nucleic acid binding [GO:0003676 molecular_function] (1); zinc ion binding [GO:0008270 molecular_function] (1)                                                                                                                                                                                                                                                                                                           | Zinc finger, CCHC-type [IPRO01878] (1)                                                                                                                                                                                                                                                          | scaffold_8_mRNA_1898.1          | -                           | -                               |
| GF0032376 | 1                            | 0                        | 0                            | 0 Hypothetical protein (1)                                       |                                                                                                                                                                                                                                                                                                                                                                                                                          |                                                                                                                                                                                                                                                                                                 | scaffold_8_mRNA_1897.1          | -                           | -                               |
| GF0032375 | 1                            | 0                        | 0                            | 0 Hypothetical protein (1)                                       |                                                                                                                                                                                                                                                                                                                                                                                                                          |                                                                                                                                                                                                                                                                                                 | scaffold_8_mRNA_1896.1          | -                           | -                               |
| GF0032374 | 1                            | 0                        | 0                            | 0 Retrotransposon gag protein (1)                                |                                                                                                                                                                                                                                                                                                                                                                                                                          | Retrotransposon gag domain [IPRO05162] (1)                                                                                                                                                                                                                                                      | scaffold_8_mRNA_1895.1          | -                           | -                               |
| GF0032373 | 1                            | 0                        | 0                            | 0 Hypothetical protein (1)                                       |                                                                                                                                                                                                                                                                                                                                                                                                                          |                                                                                                                                                                                                                                                                                                 | scaffold_8_mRNA_1893.1          | -                           | -                               |
| GF0032372 | 1                            | 0                        | 0                            | 0 Hypothetical protein (1)                                       |                                                                                                                                                                                                                                                                                                                                                                                                                          |                                                                                                                                                                                                                                                                                                 | scaffold_8_mRNA_1892.1          | -                           | -                               |
| GF0032371 | 1                            | 0                        | 0                            | 0 Hypothetical protein (1)                                       | nucleic acid binding [GO:0003676 molecular_function] (1)                                                                                                                                                                                                                                                                                                                                                                 | Ribonuclease H-like domain [IPRO12337] (1)                                                                                                                                                                                                                                                      | scaffold_8_mRNA_1889.1          | -                           | -                               |
| GF0032370 | 1                            | 0                        | 0                            | 0 Hypothetical protein (1)                                       |                                                                                                                                                                                                                                                                                                                                                                                                                          |                                                                                                                                                                                                                                                                                                 | scaffold_8_mRNA_1887.1          | -                           | -                               |
| GF0032369 | 1                            | 0                        | 0                            | 0 Hypothetical protein (1)                                       |                                                                                                                                                                                                                                                                                                                                                                                                                          |                                                                                                                                                                                                                                                                                                 | scaffold_8_mRNA_1881.1          | -                           | -                               |
| GF0032368 | 1                            | 0                        | 0                            | 0 Hypothetical protein (1)                                       |                                                                                                                                                                                                                                                                                                                                                                                                                          |                                                                                                                                                                                                                                                                                                 | scaffold_8_mRNA_1879.1          | -                           | -                               |
| GF0032367 | 1                            | 0                        | 0                            | 0 Cytokinin riboside 5'-monophosphate phosphoribohydrolase (1)   |                                                                                                                                                                                                                                                                                                                                                                                                                          | LOG family [IPRO31100] (1)                                                                                                                                                                                                                                                                      | scaffold_8_mRNA_1872.1          | -                           | -                               |
| GF0032366 | 1                            | 0                        | 0                            | 0 Hypothetical protein (1)                                       |                                                                                                                                                                                                                                                                                                                                                                                                                          |                                                                                                                                                                                                                                                                                                 | scaffold_8_mRNA_1871.1          | -                           | -                               |
| GF0032365 | 1                            | 0                        | 0                            | 0 Hypothetical protein (1)                                       |                                                                                                                                                                                                                                                                                                                                                                                                                          |                                                                                                                                                                                                                                                                                                 | scaffold_8_mRNA_1869.1          | -                           | -                               |
| GF0032364 | 1                            | 0                        | 0                            | 0 Hypothetical protein (1)                                       | nucleic acid binding [GO:0003676 molecular_function] (1); zinc ion binding [GO:0008270 molecular_function] (1)                                                                                                                                                                                                                                                                                                           | Zinc finger, CCHC-type [IPRO01878] (1)                                                                                                                                                                                                                                                          | scaffold_8_mRNA_1868.1          | -                           | -                               |
| GF0032363 | 1                            | 0                        | 0                            | 0 Hypothetical protein (1)                                       |                                                                                                                                                                                                                                                                                                                                                                                                                          |                                                                                                                                                                                                                                                                                                 | scaffold_8_mRNA_1866.1          | -                           | -                               |
| GF0032362 | 1                            | 0                        | 0                            | 0 Hypothetical protein (1)                                       |                                                                                                                                                                                                                                                                                                                                                                                                                          |                                                                                                                                                                                                                                                                                                 | scaffold_8_mRNA_1865.1          | -                           | -                               |
| GF0032361 | 1                            | 0                        | 0                            | 0 Hypothetical protein (1)                                       |                                                                                                                                                                                                                                                                                                                                                                                                                          |                                                                                                                                                                                                                                                                                                 | scaffold_8_mRNA_1864.1          | -                           | -                               |
| GF0032360 | 1                            | 0                        | 0                            | 0 Cytokinin riboside 5'-monophosphate phosphoribohydrolase (1)   |                                                                                                                                                                                                                                                                                                                                                                                                                          | LOG family [IPRO31100] (1)                                                                                                                                                                                                                                                                      | scaffold_8_mRNA_1863.1          | -                           | -                               |
| GF0032359 | 1                            | 0                        | 0                            | 0 Hypothetical protein (1)                                       |                                                                                                                                                                                                                                                                                                                                                                                                                          |                                                                                                                                                                                                                                                                                                 | scaffold_8_mRNA_1861.1          | -                           | -                               |
| GF0032358 | 1                            | 0                        | 0                            | 0 Hypothetical protein (1)                                       |                                                                                                                                                                                                                                                                                                                                                                                                                          |                                                                                                                                                                                                                                                                                                 | scaffold_8_mRNA_1859.1          | -                           | -                               |
| GF0032357 | 1                            | 0                        | 0                            | 0 Hypothetical protein (1)                                       |                                                                                                                                                                                                                                                                                                                                                                                                                          |                                                                                                                                                                                                                                                                                                 | scaffold_8_mRNA_1858.1          | -                           | -                               |
| GF0032356 | 1                            | 0                        | 0                            | 0 Hypothetical protein (1)                                       | nucleic acid binding [GO:0003676 molecular_function] (1); DNA integration [GO:0015074 biological_process] (1)                                                                                                                                                                                                                                                                                                            | Integrase, catalytic core [IPRO01584] (1); Ribonuclease H-like domain [IPRO12337] (1)                                                                                                                                                                                                           | scaffold_8_mRNA_1855.1          | -                           | -                               |
| GF0032355 | 1                            | 0                        | 0                            | 0 Hypothetical protein (1)                                       |                                                                                                                                                                                                                                                                                                                                                                                                                          |                                                                                                                                                                                                                                                                                                 | scaffold_8_mRNA_1846.1          | -                           | -                               |
| GF0032354 | 1                            | 0                        | 0                            | 0 Hypothetical protein (1)                                       |                                                                                                                                                                                                                                                                                                                                                                                                                          | Transposase-associated domain [IPRO29480] (1)                                                                                                                                                                                                                                                   | scaffold_8_mRNA_1843.1          | -                           | -                               |
| GF0032353 | 1                            | 0                        | 0                            | 0 Hypothetical protein (1)                                       |                                                                                                                                                                                                                                                                                                                                                                                                                          |                                                                                                                                                                                                                                                                                                 | scaffold_8_mRNA_1842.1          | -                           | -                               |
| GF0032352 | 1                            | 0                        | 0                            | 0 Hypothetical protein (1)                                       |                                                                                                                                                                                                                                                                                                                                                                                                                          |                                                                                                                                                                                                                                                                                                 | scaffold_8_mRNA_1841.1          | -                           | -                               |
| GF0032351 | 1                            | 0                        | 0                            | 0 Cytokinin riboside 5'-monophosphate phosphoribohydrolase (1)   |                                                                                                                                                                                                                                                                                                                                                                                                                          | LOG family [IPRO31100] (1)                                                                                                                                                                                                                                                                      | scaffold_8_mRNA_1839.1          | -                           | -                               |
| GF0032350 | 1                            | 0                        | 0                            | 0 Cytokinin riboside 5'-monophosphate phosphoribohydrolase (1)   |                                                                                                                                                                                                                                                                                                                                                                                                                          | LOG family [IPRO31100] (1)                                                                                                                                                                                                                                                                      | scaffold_8_mRNA_1837.1          | -                           | -                               |
| GF0032349 | 1                            | 0                        | 0                            | 0 Hypothetical protein (1)                                       |                                                                                                                                                                                                                                                                                                                                                                                                                          | EF-Hand 1, calcium-binding site [IPRO18247] (1)                                                                                                                                                                                                                                                 | scaffold_8_mRNA_1835.1          | -                           | -                               |
| GF0032348 | 1                            | 0                        | 0                            | 0 Hypothetical protein (1)                                       |                                                                                                                                                                                                                                                                                                                                                                                                                          |                                                                                                                                                                                                                                                                                                 | scaffold_8_mRNA_1829.1          | -                           | -                               |
| GF0032347 | 1                            | 0                        | 0                            | 0 Tobacco virus multiplication 1 (1)                             |                                                                                                                                                                                                                                                                                                                                                                                                                          | Domain of unknown function DUF1084 [IPRO09457] (1)                                                                                                                                                                                                                                              | scaffold_8_mRNA_1827.1          | -                           | -                               |
| GF0032346 | 1                            | 0                        | 0                            | 0 Cytokinin riboside 5'-monophosphate phosphoribohydrolase (1)   |                                                                                                                                                                                                                                                                                                                                                                                                                          | LOG family [IPRO31100] (1)                                                                                                                                                                                                                                                                      | scaffold_8_mRNA_1826.1          | -                           | -                               |
| GF0032345 | 1                            | 0                        | 0                            | 0 Cytokinin riboside 5'-monophosphate phosphoribohydrolase (1)   |                                                                                                                                                                                                                                                                                                                                                                                                                          | LOG family [IPRO31100] (1); Cytokinin riboside 5'-monophosphate phosphoribohydrolase LOG [IPRO05269] (1)                                                                                                                                                                                        | scaffold_8_mRNA_1824.1          | -                           | -                               |
| GF0032344 | 1                            | 0                        | 0                            | 0 Hypothetical protein (1)                                       |                                                                                                                                                                                                                                                                                                                                                                                                                          |                                                                                                                                                                                                                                                                                                 | scaffold_8_mRNA_1822.1          | -                           | -                               |
| GF0032343 | 1                            | 0                        | 0                            | 0 Hypothetical protein (1)                                       |                                                                                                                                                                                                                                                                                                                                                                                                                          |                                                                                                                                                                                                                                                                                                 | scaffold_8_mRNA_1820.1          | -                           | -                               |
| GF0032342 | 1                            | 0                        | 0                            | 0 Hypothetical protein (1)                                       |                                                                                                                                                                                                                                                                                                                                                                                                                          |                                                                                                                                                                                                                                                                                                 | scaffold_8_mRNA_1817.1          | -                           | -                               |
| GF0032341 | 1                            | 0                        | 0                            | 0 Hypothetical protein (1)                                       |                                                                                                                                                                                                                                                                                                                                                                                                                          |                                                                                                                                                                                                                                                                                                 | scaffold_8_mRNA_1812.1          | -                           | -                               |
| GF0032340 | 1                            | 0                        | 0                            | 0 Hypothetical protein (1)                                       |                                                                                                                                                                                                                                                                                                                                                                                                                          |                                                                                                                                                                                                                                                                                                 | scaffold_8_mRNA_1811.1          | -                           | -                               |
| GF0032339 | 1                            | 0                        | 0                            | 0 Hypothetical protein (1)                                       |                                                                                                                                                                                                                                                                                                                                                                                                                          |                                                                                                                                                                                                                                                                                                 | scaffold_8_mRNA_1810.1          | -                           | -                               |
| GF0032338 | 1                            | 0                        | 0                            | 0 Hypothetical protein (1)                                       |                                                                                                                                                                                                                                                                                                                                                                                                                          | LOG family [IPRO31100] (1)                                                                                                                                                                                                                                                                      | scaffold_8_mRNA_1807.1          | -                           | -                               |
| GF0032337 | 1                            | 0                        | 0                            | 0 Hypothetical protein (1)                                       |                                                                                                                                                                                                                                                                                                                                                                                                                          |                                                                                                                                                                                                                                                                                                 | scaffold_8_mRNA_1806.1          | -                           | -                               |
| GF0032336 | 1                            | 0                        | 0                            | 0 RNA-directed DNA polymerase, related (1)                       |                                                                                                                                                                                                                                                                                                                                                                                                                          | Reverse transcriptase zinc-binding domain [IPRO26960] (1)                                                                                                                                                                                                                                       | scaffold_8_mRNA_1803.1          | -                           | -                               |
| GF0032335 | 1                            | 0                        | 0                            | 0 Hypothetical protein (1)                                       |                                                                                                                                                                                                                                                                                                                                                                                                                          |                                                                                                                                                                                                                                                                                                 | scaffold_8_mRNA_1801.1          | -                           | -                               |
| GF0032334 | 1                            | 0                        | 0                            | 0 Hypothetical protein (1)                                       | protein binding [GO:0005515 molecular_function] (1)                                                                                                                                                                                                                                                                                                                                                                      | Tetrapeptide-like helical domain [IPRO11990] (1)                                                                                                                                                                                                                                                | scaffold_8_mRNA_1794.1          | -                           | -                               |
| GF0032333 | 1                            | 0                        | 0                            | 0 Hypothetical protein (1)                                       |                                                                                                                                                                                                                                                                                                                                                                                                                          | LOG family [IPRO31100] (1)                                                                                                                                                                                                                                                                      | scaffold_8_mRNA_1791.1          | -                           | -                               |
| GF0032332 | 1                            | 0                        | 0                            | 0 Cytokinin riboside 5'-monophosphate phosphoribohydrolase (1)   |                                                                                                                                                                                                                                                                                                                                                                                                                          | Cytokinin riboside 5'-monophosphate phosphoribohydrolase LOG [IPRO05269] (1); LOG family [IPRO31100] (1)                                                                                                                                                                                        | scaffold_8_mRNA_1790.1          | -                           | -                               |
| GF0032331 | 1                            | 0                        | 0                            | 0 Hypothetical protein (1)                                       | regulation of transcription, DNA-templated [GO:0006355 biological_process] (1); nucleic acid binding [GO:0003676 molecular_function] (1)                                                                                                                                                                                                                                                                                 | Carlavirus nucleic acid-binding protein [IPRO02568] (1)                                                                                                                                                                                                                                         | scaffold_8_mRNA_1789.1          | -                           | -                               |
| GF0032330 | 1                            | 0                        | 0                            | 0 Hypothetical protein (1)                                       |                                                                                                                                                                                                                                                                                                                                                                                                                          |                                                                                                                                                                                                                                                                                                 | scaffold_8_mRNA_1784.1          | -                           | -                               |
| GF0032329 | 1                            | 0                        | 0                            | 0 Hypothetical protein (1)                                       |                                                                                                                                                                                                                                                                                                                                                                                                                          |                                                                                                                                                                                                                                                                                                 | scaffold_8_mRNA_1777.1          | -                           | -                               |
| GF0032328 | 1                            | 0                        | 0                            | 0 Cytokinin riboside 5'-monophosphate phosphoribohydrolase (1)   |                                                                                                                                                                                                                                                                                                                                                                                                                          | LOG family [IPRO31100] (1)                                                                                                                                                                                                                                                                      | scaffold_8_mRNA_1772.1          | -                           | -                               |
| GF0032327 | 1                            | 0                        | 0                            | 0 Hypothetical protein (1)                                       | nucleic acid binding [GO:0003676 molecular_function] (1); zinc ion binding [GO:0008270 molecular_function] (1)                                                                                                                                                                                                                                                                                                           | Zinc finger, CCHC-type [IPRO01878] (1)                                                                                                                                                                                                                                                          | scaffold_8_mRNA_1771.1          | -                           | -                               |
| GF0032326 | 1                            | 0                        | 0                            | 0 Hypothetical protein (1)                                       |                                                                                                                                                                                                                                                                                                                                                                                                                          |                                                                                                                                                                                                                                                                                                 | scaffold_8_mRNA_1770.1          | -                           | -                               |
| GF0032325 | 1                            | 0                        | 0                            | 0 Cytokinin riboside 5'-monophosphate phosphoribohydrolase (1)   |                                                                                                                                                                                                                                                                                                                                                                                                                          | Cytokinin riboside 5'-monophosphate phosphoribohydrolase LOG [IPRO05269] (1); LOG family [IPRO31100] (1)                                                                                                                                                                                        | scaffold_8_mRNA_1769.1          | -                           | -                               |
| GF0032324 | 1                            | 0                        | 0                            | 0 Hypothetical protein (1)                                       |                                                                                                                                                                                                                                                                                                                                                                                                                          |                                                                                                                                                                                                                                                                                                 | scaffold_8_mRNA_1763.1          | -                           | -                               |
| GF0032323 | 1                            | 0                        | 0                            | 0 Retrotransposon gag protein (1)                                |                                                                                                                                                                                                                                                                                                                                                                                                                          | Retrotransposon gag domain [IPRO05162] (1)                                                                                                                                                                                                                                                      | scaffold_8_mRNA_1760.1          | -                           | -                               |
| GF0032322 | 1                            | 0                        | 0                            | 0 Hypothetical protein (1)                                       |                                                                                                                                                                                                                                                                                                                                                                                                                          |                                                                                                                                                                                                                                                                                                 | scaffold_8_mRNA_1758.1          | -                           | -                               |
| GF0032321 | 1                            | 0                        | 0                            | 0 Hypothetical protein (1)                                       | zinc ion binding [GO:0008270 molecular_function] (1); regulation of transcription, DNA-templated [GO:0006355 biological_process] (1)                                                                                                                                                                                                                                                                                     | Zinc finger, SWIM-type [IPRO07527] (1); FHY3/FAR1 family [IPRO31052] (1)                                                                                                                                                                                                                        | scaffold_8_mRNA_1757.1          | -                           | -                               |
| GF0032320 | 1                            | 0                        | 0                            | 0 Hypothetical protein (1)                                       |                                                                                                                                                                                                                                                                                                                                                                                                                          |                                                                                                                                                                                                                                                                                                 | scaffold_8_mRNA_1755.1          | -                           | -                               |
| GF0032319 | 1                            | 0                        | 0                            | 0 Hypothetical protein (1)                                       |                                                                                                                                                                                                                                                                                                                                                                                                                          |                                                                                                                                                                                                                                                                                                 | scaffold_8_mRNA_1754.1          | -                           | -                               |

| ID        | Num. in <i>C. clementiae</i> | Num in <i>C. uchiha</i> | Num in <i>P. trifoliata</i> | Note                                                                                                                       | GO                                                                                                                                                                                                                                        | InterPro                                                                                                                                                                                                                                   | Members in <i>C. clementiae</i> | Members in <i>C. uchiha</i> | Members in <i>P. trifoliata</i> |
|-----------|------------------------------|-------------------------|-----------------------------|----------------------------------------------------------------------------------------------------------------------------|-------------------------------------------------------------------------------------------------------------------------------------------------------------------------------------------------------------------------------------------|--------------------------------------------------------------------------------------------------------------------------------------------------------------------------------------------------------------------------------------------|---------------------------------|-----------------------------|---------------------------------|
| GF0032318 | 1                            | 0                       | 0                           | 0 Hypothetical protein (1)                                                                                                 |                                                                                                                                                                                                                                           |                                                                                                                                                                                                                                            | scaffold_8_mRNA_1751.1          | -                           | -                               |
| GF0032317 | 1                            | 0                       | 0                           | 0 Cytokinin riboside 5'-monophosphate phosphoribohydrolase (1)                                                             |                                                                                                                                                                                                                                           | LOG family [IPR031100] (1)                                                                                                                                                                                                                 | scaffold_8_mRNA_1740.1          | -                           | -                               |
| GF0032316 | 1                            | 0                       | 0                           | 0 Hypothetical protein (1)                                                                                                 |                                                                                                                                                                                                                                           |                                                                                                                                                                                                                                            | scaffold_8_mRNA_1739.1          | -                           | -                               |
| GF0032315 | 1                            | 0                       | 0                           | 0 Hypothetical protein (1)                                                                                                 |                                                                                                                                                                                                                                           |                                                                                                                                                                                                                                            | scaffold_8_mRNA_1738.1          | -                           | -                               |
| GF0032314 | 1                            | 0                       | 0                           | 0 Hypothetical protein (1)                                                                                                 |                                                                                                                                                                                                                                           |                                                                                                                                                                                                                                            | scaffold_8_mRNA_1736.1          | -                           | -                               |
| GF0032313 | 1                            | 0                       | 0                           | 0 ABC transporter G family member 11 (1) [GO:0016887 molecular_function] (1); mcnbrane [GO:0016020 cellular_component] (1) | ATP binding [GO:000524 molecular_function] (1); ATPase activity [GO:0003676 molecular_function] (1);                                                                                                                                      | P-loop containing nucleoside triphosphate hydrolase [IPR027417] (1); ABC transporter-like [IPR003439] (1); ABC-2 type transporter [IPR013253] (1); AAA-type ATPase domain [IPR003593] (1); ABC transporter, conserved site [IPR017871] (1) | scaffold_8_mRNA_1735.1          | -                           | -                               |
| GF0032312 | 1                            | 0                       | 0                           | 0 Hypothetical protein (1)                                                                                                 |                                                                                                                                                                                                                                           |                                                                                                                                                                                                                                            | scaffold_8_mRNA_1734.1          | -                           | -                               |
| GF0032311 | 1                            | 0                       | 0                           | 0 Cytokinin riboside 5'-monophosphate phosphoribohydrolase (1)                                                             |                                                                                                                                                                                                                                           | Cytokinin riboside 5'-monophosphate phosphoribohydrolase LOG [IPR005269] (1); LOG family [IPR031100] (1)                                                                                                                                   | scaffold_8_mRNA_1733.1          | -                           | -                               |
| GF0032310 | 1                            | 0                       | 0                           | 0 Hypothetical protein (1)                                                                                                 |                                                                                                                                                                                                                                           |                                                                                                                                                                                                                                            | scaffold_8_mRNA_1732.1          | -                           | -                               |
| GF0032309 | 1                            | 0                       | 0                           | 0 Cytokinin riboside 5'-monophosphate phosphoribohydrolase (1)                                                             |                                                                                                                                                                                                                                           | Cytokinin riboside 5'-monophosphate phosphoribohydrolase LOG [IPR005269] (1); LOG family [IPR031100] (1)                                                                                                                                   | scaffold_8_mRNA_1731.1          | -                           | -                               |
| GF0032308 | 1                            | 0                       | 0                           | 0 Hypothetical protein (1)                                                                                                 |                                                                                                                                                                                                                                           |                                                                                                                                                                                                                                            | scaffold_8_mRNA_1730.1          | -                           | -                               |
| GF0032307 | 1                            | 0                       | 0                           | 0 Hypothetical protein (1)                                                                                                 |                                                                                                                                                                                                                                           |                                                                                                                                                                                                                                            | scaffold_8_mRNA_1729.1          | -                           | -                               |
| GF0032306 | 1                            | 0                       | 0                           | 0 Hypothetical protein (1)                                                                                                 |                                                                                                                                                                                                                                           | LOG family [IPR031100] (1)                                                                                                                                                                                                                 | scaffold_8_mRNA_1728.1          | -                           | -                               |
| GF0032305 | 1                            | 0                       | 0                           | 0 Hypothetical protein (1)                                                                                                 |                                                                                                                                                                                                                                           |                                                                                                                                                                                                                                            | scaffold_8_mRNA_1727.1          | -                           | -                               |
| GF0032304 | 1                            | 0                       | 0                           | 0 Hypothetical protein (1)                                                                                                 |                                                                                                                                                                                                                                           |                                                                                                                                                                                                                                            | scaffold_8_mRNA_1724.1          | -                           | -                               |
| GF0032303 | 1                            | 0                       | 0                           | 0 Hypothetical protein (1)                                                                                                 |                                                                                                                                                                                                                                           | Reverse transcriptase domain [IPR000477] (1)                                                                                                                                                                                               | scaffold_8_mRNA_1720.1          | -                           | -                               |
| GF0032302 | 1                            | 0                       | 0                           | 0 Hypothetical protein (1)                                                                                                 |                                                                                                                                                                                                                                           |                                                                                                                                                                                                                                            | scaffold_8_mRNA_1716.1          | -                           | -                               |
| GF0032301 | 1                            | 0                       | 0                           | 0 Hypothetical protein (1)                                                                                                 |                                                                                                                                                                                                                                           |                                                                                                                                                                                                                                            | scaffold_8_mRNA_1715.1          | -                           | -                               |
| GF0032300 | 1                            | 0                       | 0                           | 0 Hypothetical protein (1)                                                                                                 |                                                                                                                                                                                                                                           |                                                                                                                                                                                                                                            | scaffold_8_mRNA_1711.1          | -                           | -                               |
| GF0032299 | 1                            | 0                       | 0                           | 0 Hypothetical protein (1)                                                                                                 | protein dimerization activity [GO:0046983 molecular_function] (1); nucleic acid binding [GO:0003676 molecular_function] (1)                                                                                                               | HAT, C-terminal dimerisation domain [IPR008906] (1); Ribonuclease H-like domain [IPR012337] (1)                                                                                                                                            | scaffold_8_mRNA_1708.1          | -                           | -                               |
| GF0032298 | 1                            | 0                       | 0                           | 0 Hypothetical protein (1)                                                                                                 |                                                                                                                                                                                                                                           |                                                                                                                                                                                                                                            | scaffold_8_mRNA_1706.1          | -                           | -                               |
| GF0032297 | 1                            | 0                       | 0                           | 0 Cytokinin riboside 5'-monophosphate phosphoribohydrolase (1)                                                             |                                                                                                                                                                                                                                           | LOG family [IPR031100] (1)                                                                                                                                                                                                                 | scaffold_8_mRNA_1705.1          | -                           | -                               |
| GF0032296 | 1                            | 0                       | 0                           | 0 Hypothetical protein (1)                                                                                                 |                                                                                                                                                                                                                                           |                                                                                                                                                                                                                                            | scaffold_8_mRNA_1703.1          | -                           | -                               |
| GF0032295 | 1                            | 0                       | 0                           | 0 Hypothetical protein (1)                                                                                                 | proteolysis [GO:0006508 biological_process] (1); aspartic-type endopeptidase activity [GO:0004190 molecular_function] (1)                                                                                                                 | Aspartic peptidase, active site [IPR001969] (1)                                                                                                                                                                                            | scaffold_8_mRNA_1702.1          | -                           | -                               |
| GF0032294 | 1                            | 0                       | 0                           | 0 Hypothetical protein (1)                                                                                                 |                                                                                                                                                                                                                                           |                                                                                                                                                                                                                                            | scaffold_8_mRNA_1701.1          | -                           | -                               |
| GF0032293 | 1                            | 0                       | 0                           | 0 Hypothetical protein (1)                                                                                                 |                                                                                                                                                                                                                                           |                                                                                                                                                                                                                                            | scaffold_8_mRNA_1700.1          | -                           | -                               |
| GF0032292 | 1                            | 0                       | 0                           | 0 Hypothetical protein (1)                                                                                                 | regulation of transcription, DNA-templated [GO:0006355 biological_process] (1); nucleic acid binding [GO:0003676 molecular_function] (1)                                                                                                  | Carlavirus nucleic acid-binding protein [IPR002568] (1); Retrotransposon gag domain [IPR005162] (1)                                                                                                                                        | scaffold_8_mRNA_1698.1          | -                           | -                               |
| GF0032291 | 1                            | 0                       | 0                           | 0 Hypothetical protein (1)                                                                                                 | zinc ion binding [GO:0008270 molecular_function] (1)                                                                                                                                                                                      | Zinc finger, PMZ-type [IPR006564] (1); Zinc finger, SWIM-type [IPR007527] (1)                                                                                                                                                              | scaffold_8_mRNA_1696.1          | -                           | -                               |
| GF0032290 | 1                            | 0                       | 0                           | 0 Hypothetical protein (1)                                                                                                 |                                                                                                                                                                                                                                           |                                                                                                                                                                                                                                            | scaffold_8_mRNA_1695.1          | -                           | -                               |
| GF0032289 | 1                            | 0                       | 0                           | 0 Hypothetical protein (1)                                                                                                 | nucleic acid binding [GO:0003676 molecular_function] (1); zinc ion binding [GO:0008270 molecular_function] (1)                                                                                                                            | Zinc finger, CCHC-type [IPR001878] (1)                                                                                                                                                                                                     | scaffold_8_mRNA_1694.1          | -                           | -                               |
| GF0032288 | 1                            | 0                       | 0                           | 0 Hypothetical protein (1)                                                                                                 |                                                                                                                                                                                                                                           |                                                                                                                                                                                                                                            | scaffold_8_mRNA_1692.1          | -                           | -                               |
| GF0032287 | 1                            | 0                       | 0                           | 0 Hypothetical protein (1)                                                                                                 |                                                                                                                                                                                                                                           | Viral movement protein [IPR028919] (1)                                                                                                                                                                                                     | scaffold_8_mRNA_1690.1          | -                           | -                               |
| GF0032286 | 1                            | 0                       | 0                           | 0 Hypothetical protein (1)                                                                                                 | zinc ion binding [GO:0008270 molecular_function] (1); nucleic acid binding [GO:0003676 molecular_function] (1)                                                                                                                            | Zinc finger, CCHC-type [IPR001878] (1)                                                                                                                                                                                                     | scaffold_8_mRNA_1689.1          | -                           | -                               |
| GF0032285 | 1                            | 0                       | 0                           | 0 Hypothetical protein (1)                                                                                                 |                                                                                                                                                                                                                                           |                                                                                                                                                                                                                                            | scaffold_8_mRNA_1685.1          | -                           | -                               |
| GF0032284 | 1                            | 0                       | 0                           | 0 Cytokinin riboside 5'-monophosphate phosphoribohydrolase (1)                                                             |                                                                                                                                                                                                                                           | LOG family [IPR031100] (1)                                                                                                                                                                                                                 | scaffold_8_mRNA_1683.1          | -                           | -                               |
| GF0032283 | 1                            | 0                       | 0                           | 0 Cytokinin riboside 5'-monophosphate phosphoribohydrolase (1)                                                             |                                                                                                                                                                                                                                           | LOG family [IPR031100] (1)                                                                                                                                                                                                                 | scaffold_8_mRNA_1681.1          | -                           | -                               |
| GF0032282 | 1                            | 0                       | 0                           | 0 Hypothetical protein (1)                                                                                                 |                                                                                                                                                                                                                                           | Retrotransposon gag domain [IPR005162] (1)                                                                                                                                                                                                 | scaffold_8_mRNA_1680.1          | -                           | -                               |
| GF0032281 | 1                            | 0                       | 0                           | 0 RBD zinc finger/JAT family dimerization (1)                                                                              | nucleic acid binding [GO:0003676 molecular_function] (1); DNA binding [GO:0003677 molecular_function] (1)                                                                                                                                 | Ribonuclease H-like domain [IPR012337] (1); hAT-like transposase, RNase-H fold [IPR025252] (1)                                                                                                                                             | scaffold_8_mRNA_1674.1          | -                           | -                               |
| GF0032280 | 1                            | 0                       | 0                           | 0 Hypothetical protein (1)                                                                                                 |                                                                                                                                                                                                                                           |                                                                                                                                                                                                                                            | scaffold_8_mRNA_1672.1          | -                           | -                               |
| GF0032279 | 1                            | 0                       | 0                           | 0 Hypothetical protein (1)                                                                                                 |                                                                                                                                                                                                                                           |                                                                                                                                                                                                                                            | scaffold_8_mRNA_1671.1          | -                           | -                               |
| GF0032278 | 1                            | 0                       | 0                           | 0 Hypothetical protein (1)                                                                                                 |                                                                                                                                                                                                                                           |                                                                                                                                                                                                                                            | scaffold_8_mRNA_1670.1          | -                           | -                               |
| GF0032277 | 1                            | 0                       | 0                           | 0 Hypothetical protein (1)                                                                                                 |                                                                                                                                                                                                                                           |                                                                                                                                                                                                                                            | scaffold_8_mRNA_1669.1          | -                           | -                               |
| GF0032276 | 1                            | 0                       | 0                           | 0 Cytokinin riboside 5'-monophosphate phosphoribohydrolase (1)                                                             |                                                                                                                                                                                                                                           | LOG family [IPR031100] (1); Cytokinin riboside 5'-monophosphate phosphoribohydrolase LOG [IPR005269] (1)                                                                                                                                   | scaffold_8_mRNA_1666.1          | -                           | -                               |
| GF0032275 | 1                            | 0                       | 0                           | 0 Hypothetical protein (1)                                                                                                 |                                                                                                                                                                                                                                           |                                                                                                                                                                                                                                            | scaffold_8_mRNA_1665.1          | -                           | -                               |
| GF0032274 | 1                            | 0                       | 0                           | 0 Hypothetical protein (1)                                                                                                 |                                                                                                                                                                                                                                           |                                                                                                                                                                                                                                            | scaffold_8_mRNA_1664.1          | -                           | -                               |
| GF0032273 | 1                            | 0                       | 0                           | 0 Gag protease polyprotein, putative (1)                                                                                   |                                                                                                                                                                                                                                           | Aspartic peptidase domain [IPR021109] (1); Retroviral aspartyl protease [IPR013242] (1)                                                                                                                                                    | scaffold_8_mRNA_1663.1          | -                           | -                               |
| GF0032272 | 1                            | 0                       | 0                           | 0 Hypothetical protein (1)                                                                                                 |                                                                                                                                                                                                                                           |                                                                                                                                                                                                                                            | scaffold_8_mRNA_1662.1          | -                           | -                               |
| GF0032271 | 1                            | 0                       | 0                           | 0 Cytokinin riboside 5'-monophosphate phosphoribohydrolase (1)                                                             | zinc ion binding [GO:0008270 molecular_function] (1); nucleic acid binding [GO:0003676 molecular_function] (1)                                                                                                                            | Zinc finger, CCHC-type [IPR001878] (1)                                                                                                                                                                                                     | scaffold_8_mRNA_1661.1          | -                           | -                               |
| GF0032270 | 1                            | 0                       | 0                           | 0 Hypothetical protein (1)                                                                                                 |                                                                                                                                                                                                                                           | Retrotransposon gag domain [IPR005162] (1)                                                                                                                                                                                                 | scaffold_8_mRNA_1660.1          | -                           | -                               |
| GF0032269 | 1                            | 0                       | 0                           | 0 Hypothetical protein (1)                                                                                                 |                                                                                                                                                                                                                                           | Domain of unknown function DUF4219 [IPR025314] (1)                                                                                                                                                                                         | scaffold_8_mRNA_1658.1          | -                           | -                               |
| GF0032268 | 1                            | 0                       | 0                           | 0 Hypothetical protein (1)                                                                                                 | nucleic acid binding [GO:0003676 molecular_function] (1); zinc ion binding [GO:0008270 molecular_function] (1)                                                                                                                            | Zinc finger, CCHC-type [IPR001878] (1)                                                                                                                                                                                                     | scaffold_8_mRNA_1656.1          | -                           | -                               |
| GF0032267 | 1                            | 0                       | 0                           | 0 Hypothetical protein (1)                                                                                                 |                                                                                                                                                                                                                                           |                                                                                                                                                                                                                                            | scaffold_8_mRNA_1654.1          | -                           | -                               |
| GF0032266 | 1                            | 0                       | 0                           | 0 Hypothetical protein (1)                                                                                                 |                                                                                                                                                                                                                                           |                                                                                                                                                                                                                                            | scaffold_8_mRNA_1653.1          | -                           | -                               |
| GF0032265 | 1                            | 0                       | 0                           | 0 Hypothetical protein (1)                                                                                                 |                                                                                                                                                                                                                                           |                                                                                                                                                                                                                                            | scaffold_8_mRNA_1652.1          | -                           | -                               |
| GF0032264 | 1                            | 0                       | 0                           | 0 Hypothetical protein (1)                                                                                                 |                                                                                                                                                                                                                                           |                                                                                                                                                                                                                                            | scaffold_8_mRNA_1649.1          | -                           | -                               |
| GF0032263 | 1                            | 0                       | 0                           | 0 Hypothetical protein (1)                                                                                                 |                                                                                                                                                                                                                                           |                                                                                                                                                                                                                                            | scaffold_8_mRNA_1648.1          | -                           | -                               |
| GF0032262 | 1                            | 0                       | 0                           | 0 Hypothetical protein (1)                                                                                                 |                                                                                                                                                                                                                                           |                                                                                                                                                                                                                                            | scaffold_8_mRNA_1647.1          | -                           | -                               |
| GF0032261 | 1                            | 0                       | 0                           | 0 Hypothetical protein (1)                                                                                                 |                                                                                                                                                                                                                                           |                                                                                                                                                                                                                                            | scaffold_8_mRNA_1645.1          | -                           | -                               |
| GF0032260 | 1                            | 0                       | 0                           | 0 Hypothetical protein (1)                                                                                                 |                                                                                                                                                                                                                                           |                                                                                                                                                                                                                                            | scaffold_8_mRNA_1644.1          | -                           | -                               |
| GF0032259 | 1                            | 0                       | 0                           | 0 Hypothetical protein (1)                                                                                                 |                                                                                                                                                                                                                                           |                                                                                                                                                                                                                                            | scaffold_8_mRNA_1640.1          | -                           | -                               |
| GF0032258 | 1                            | 0                       | 0                           | 0 Hypothetical protein (1)                                                                                                 |                                                                                                                                                                                                                                           |                                                                                                                                                                                                                                            | scaffold_8_mRNA_1638.1          | -                           | -                               |
| GF0032257 | 1                            | 0                       | 0                           | 0 Hypothetical protein (1)                                                                                                 | aspartic-type endopeptidase activity [GO:0004190 molecular_function] (1); zinc ion binding [GO:0008270 molecular_function] (1); proteolysis [GO:0006508 biological_process] (1); nucleic acid binding [GO:0003676 molecular_function] (1) | Retropoepsins [IPR018061] (1); Peptidase A2A, retrovirus, catalytic [IPR001995] (1); Aspartic peptidase domain [IPR021109] (1); Zinc finger, CCHC-type [IPR001878] (1)                                                                     | scaffold_8_mRNA_1634.1          | -                           | -                               |
| GF0032256 | 1                            | 0                       | 0                           | 0 Hypothetical protein (1)                                                                                                 |                                                                                                                                                                                                                                           |                                                                                                                                                                                                                                            | scaffold_8_mRNA_1633.1          | -                           | -                               |
| GF0032255 | 1                            | 0                       | 0                           | 0 Hypothetical protein (1)                                                                                                 | proteolysis [GO:0006508 biological_process] (1); aspartic-type endopeptidase activity [GO:0004190 molecular_function] (1)                                                                                                                 | Viral movement protein [IPR028919] (1) Retropoepsin [IPR018061] (1); Peptidase A2A, retrovirus, catalytic [IPR001995] (1); Aspartic peptidase domain [IPR021109] (1)                                                                       | scaffold_8_mRNA_1632.1          | -                           | -                               |
| GF0032254 | 1                            | 0                       | 0                           | 0 Hypothetical protein (1)                                                                                                 |                                                                                                                                                                                                                                           |                                                                                                                                                                                                                                            | scaffold_8_mRNA_1630.1          | -                           | -                               |
| GF0032253 | 1                            | 0                       | 0                           | 0 Hypothetical protein (1)                                                                                                 |                                                                                                                                                                                                                                           |                                                                                                                                                                                                                                            | scaffold_8_mRNA_1629.1          | -                           | -                               |
| GF0032252 | 1                            | 0                       | 0                           | 0 Hypothetical protein (1)                                                                                                 |                                                                                                                                                                                                                                           |                                                                                                                                                                                                                                            | scaffold_8_mRNA_1628.1          | -                           | -                               |
| GF0032251 | 1                            | 0                       | 0                           | 0 Metacaspase 1 isoform 1 (1)                                                                                              |                                                                                                                                                                                                                                           | Metacaspase type 1, plant [IPR033180] (1); Caspase-like domain [IPR029030] (1)                                                                                                                                                             | scaffold_8_mRNA_1624.1          | -                           | -                               |
| GF0032250 | 1                            | 0                       | 0                           | 0 Hypothetical protein (1)                                                                                                 | regulation of transcription, DNA-templated [GO:0006355 biological_process] (1); protein binding [GO:0005515 molecular_function] (1)                                                                                                       | WD40-repeat-containing domain [IPR01996] (1); WD40 repeat [IPR001680] (1); Topless family [IPR027278] (1); Leucine-rich repeat domain, L domain-like [IPR032675] (1)                                                                       | scaffold_8_mRNA_1621.1          | -                           | -                               |
| GF0032249 | 1                            | 0                       | 0                           | 0 Hypothetical protein (1)                                                                                                 |                                                                                                                                                                                                                                           |                                                                                                                                                                                                                                            | scaffold_8_mRNA_1620.1          | -                           | -                               |
| GF0032248 | 1                            | 0                       | 0                           | 0 Hypothetical protein (1)                                                                                                 |                                                                                                                                                                                                                                           |                                                                                                                                                                                                                                            | scaffold_8_mRNA_1619.1          | -                           | -                               |
| GF0032247 | 1                            | 0                       | 0                           | 0 Hypothetical protein (1)                                                                                                 |                                                                                                                                                                                                                                           |                                                                                                                                                                                                                                            | scaffold_8_mRNA_1609.1          | -                           | -                               |
| GF0032246 | 1                            | 0                       | 0                           | 0 Hypothetical protein (1)                                                                                                 |                                                                                                                                                                                                                                           |                                                                                                                                                                                                                                            | scaffold_8_mRNA_1603.1          | -                           | -                               |
| GF0032245 | 1                            | 0                       | 0                           | 0 Hypothetical protein (1)                                                                                                 |                                                                                                                                                                                                                                           |                                                                                                                                                                                                                                            | scaffold_8_mRNA_1602.1          | -                           | -                               |
| GF0032244 | 1                            | 0                       | 0                           | 0 Hypothetical protein (1)                                                                                                 |                                                                                                                                                                                                                                           |                                                                                                                                                                                                                                            | scaffold_8_mRNA_1600.1          | -                           | -                               |

| ID        | Num. in <i>C. clementinae</i> | Num. in <i>C. uchiha</i> | Num. in <i>P. trifoliata</i> | Note                                                            | GO                                                                                                                                                                                                                                                                                                                                                                                                         | InterPro                                                                                                                                                                                                           | Members in <i>C. clementinae</i> | Members in <i>C. uchiha</i> | Members in <i>P. trifoliata</i> |
|-----------|-------------------------------|--------------------------|------------------------------|-----------------------------------------------------------------|------------------------------------------------------------------------------------------------------------------------------------------------------------------------------------------------------------------------------------------------------------------------------------------------------------------------------------------------------------------------------------------------------------|--------------------------------------------------------------------------------------------------------------------------------------------------------------------------------------------------------------------|----------------------------------|-----------------------------|---------------------------------|
| GF0032243 | 1                             | 0                        | 0                            | 0 Putative anion transporter 5 (1)                              | transmembrane transport [GO:0055085 biological_process] (1); integral component of membrane [GO:0016021 cellular_component] (1)                                                                                                                                                                                                                                                                            | Major facilitator superfamily domain [IPRO20846] (1); Major facilitator superfamily [IPRO11701] (1)                                                                                                                | scaffold_8_mRNA_16.1             | -                           | -                               |
| GF0032242 | 1                             | 0                        | 0                            | 0 Hypothetical protein (1)                                      |                                                                                                                                                                                                                                                                                                                                                                                                            | Viral movement protein [IPRO28919] (1)                                                                                                                                                                             | scaffold_8_mRNA_1599.1           | -                           | -                               |
| GF0032241 | 1                             | 0                        | 0                            | 0 Hypothetical protein (1)                                      |                                                                                                                                                                                                                                                                                                                                                                                                            |                                                                                                                                                                                                                    | scaffold_8_mRNA_1598.1           | -                           | -                               |
| GF0032240 | 1                             | 0                        | 0                            | 0 Hypothetical protein (1)                                      |                                                                                                                                                                                                                                                                                                                                                                                                            |                                                                                                                                                                                                                    | scaffold_8_mRNA_1597.1           | -                           | -                               |
| GF0032239 | 1                             | 0                        | 0                            | 0 Hypothetical protein (1)                                      |                                                                                                                                                                                                                                                                                                                                                                                                            |                                                                                                                                                                                                                    | scaffold_8_mRNA_1592.1           | -                           | -                               |
| GF0032238 | 1                             | 0                        | 0                            | 0 Hypothetical protein (1)                                      |                                                                                                                                                                                                                                                                                                                                                                                                            |                                                                                                                                                                                                                    | scaffold_8_mRNA_1588.1           | -                           | -                               |
| GF0032237 | 1                             | 0                        | 0                            | 0 Hypothetical protein (1)                                      | aspartic-type endopeptidase activity [GO:0004190 molecular_function] (1); zinc ion binding [GO:0008270 molecular_function] (1); proteolysis [GO:0006508 biological_process] (1); nucleic acid binding [GO:0003676 molecular_function] (1)                                                                                                                                                                  | Aspartic peptidase domain [IPRO21109] (1); Zinc finger, CCHC-type [IPRO01878] (1); Retropepsin [IPRO18061] (1); Reverse transcriptase domain [IPRO00477] (1); Peptidase A2A, retrovirus, catalytic [IPRO01995] (1) | scaffold_8_mRNA_1586.1           | -                           | -                               |
| GF0032236 | 1                             | 0                        | 0                            | 0 Hypothetical protein (1)                                      |                                                                                                                                                                                                                                                                                                                                                                                                            |                                                                                                                                                                                                                    | scaffold_8_mRNA_1584.1           | -                           | -                               |
| GF0032235 | 1                             | 0                        | 0                            | 0 Hypothetical protein (1)                                      |                                                                                                                                                                                                                                                                                                                                                                                                            |                                                                                                                                                                                                                    | scaffold_8_mRNA_1583.1           | -                           | -                               |
| GF0032234 | 1                             | 0                        | 0                            | 0 Hypothetical protein (1)                                      |                                                                                                                                                                                                                                                                                                                                                                                                            |                                                                                                                                                                                                                    | scaffold_8_mRNA_1582.1           | -                           | -                               |
| GF0032233 | 1                             | 0                        | 0                            | 0 Hypothetical protein (1)                                      |                                                                                                                                                                                                                                                                                                                                                                                                            | LOG family [IPRO31100] (1)                                                                                                                                                                                         | scaffold_8_mRNA_1581.1           | -                           | -                               |
| GF0032232 | 1                             | 0                        | 0                            | 0 Hypothetical protein (1)                                      |                                                                                                                                                                                                                                                                                                                                                                                                            |                                                                                                                                                                                                                    | scaffold_8_mRNA_1580.1           | -                           | -                               |
| GF0032231 | 1                             | 0                        | 0                            | 0 Hypothetical protein (1)                                      |                                                                                                                                                                                                                                                                                                                                                                                                            |                                                                                                                                                                                                                    | scaffold_8_mRNA_1577.1           | -                           | -                               |
| GF0032230 | 1                             | 0                        | 0                            | 0 Hypothetical protein (1)                                      |                                                                                                                                                                                                                                                                                                                                                                                                            | Reverse transcriptase domain [IPRO00477] (1)                                                                                                                                                                       | scaffold_8_mRNA_1575.1           | -                           | -                               |
| GF0032229 | 1                             | 0                        | 0                            | 0 Hypothetical protein (1)                                      |                                                                                                                                                                                                                                                                                                                                                                                                            |                                                                                                                                                                                                                    | scaffold_8_mRNA_1574.1           | -                           | -                               |
| GF0032228 | 1                             | 0                        | 0                            | 0 Hypothetical protein (1)                                      |                                                                                                                                                                                                                                                                                                                                                                                                            |                                                                                                                                                                                                                    | scaffold_8_mRNA_1573.1           | -                           | -                               |
| GF0032227 | 1                             | 0                        | 0                            | 0 Hypothetical protein (1)                                      |                                                                                                                                                                                                                                                                                                                                                                                                            |                                                                                                                                                                                                                    | scaffold_8_mRNA_1567.1           | -                           | -                               |
| GF0032226 | 1                             | 0                        | 0                            | 0 Hypothetical protein (1)                                      |                                                                                                                                                                                                                                                                                                                                                                                                            |                                                                                                                                                                                                                    | scaffold_8_mRNA_1566.1           | -                           | -                               |
| GF0032225 | 1                             | 0                        | 0                            | 0 Hypothetical protein (1)                                      |                                                                                                                                                                                                                                                                                                                                                                                                            |                                                                                                                                                                                                                    | scaffold_8_mRNA_1565.1           | -                           | -                               |
| GF0032224 | 1                             | 0                        | 0                            | 0 LRR receptor-like serine/threonine-protein kinase GSO1 (1)    | protein binding [GO:0005515 molecular_function] (1)                                                                                                                                                                                                                                                                                                                                                        | Leucine-rich repeat domain, L domain-like [IPRO32675] (1); Leucine-rich repeat [IPRO01611] (1)                                                                                                                     | scaffold_8_mRNA_1560.1           | -                           | -                               |
| GF0032223 | 1                             | 0                        | 0                            | 0 Hypothetical protein (1)                                      |                                                                                                                                                                                                                                                                                                                                                                                                            |                                                                                                                                                                                                                    | scaffold_8_mRNA_1559.1           | -                           | -                               |
| GF0032222 | 1                             | 0                        | 0                            | 0 Hypothetical protein (1)                                      | proteolysis [GO:0006508 biological_process] (1); cysteine-type peptidase activity [GO:0008234 molecular_function] (1)                                                                                                                                                                                                                                                                                      | Upl1 protease family, C-terminal catalytic domain [IPRO03653] (1)                                                                                                                                                  | scaffold_8_mRNA_1556.1           | -                           | -                               |
| GF0032221 | 1                             | 0                        | 0                            | 0 Hypothetical protein (1)                                      | nucleic acid binding [GO:0003676 molecular_function] (1); zinc ion binding [GO:0008270 molecular_function] (1)                                                                                                                                                                                                                                                                                             | Zinc finger, CCHC-type [IPRO01878] (1); Transposase, MuDR, plant [IPRO04352] (1); MULE transposase domain [IPRO18289] (1)                                                                                          | scaffold_8_mRNA_1555.1           | -                           | -                               |
| GF0032220 | 1                             | 0                        | 0                            | 0 Hypothetical protein (1)                                      |                                                                                                                                                                                                                                                                                                                                                                                                            |                                                                                                                                                                                                                    | scaffold_8_mRNA_1553.1           | -                           | -                               |
| GF0032219 | 1                             | 0                        | 0                            | 0 Hypothetical protein (1)                                      |                                                                                                                                                                                                                                                                                                                                                                                                            |                                                                                                                                                                                                                    | scaffold_8_mRNA_1551.1           | -                           | -                               |
| GF0032218 | 1                             | 0                        | 0                            | 0 Hypothetical protein (1)                                      |                                                                                                                                                                                                                                                                                                                                                                                                            |                                                                                                                                                                                                                    | scaffold_8_mRNA_1549.1           | -                           | -                               |
| GF0032217 | 1                             | 0                        | 0                            | 0 Hypothetical protein (1)                                      |                                                                                                                                                                                                                                                                                                                                                                                                            |                                                                                                                                                                                                                    | scaffold_8_mRNA_1544.1           | -                           | -                               |
| GF0032216 | 1                             | 0                        | 0                            | 0 Hypothetical protein (1)                                      |                                                                                                                                                                                                                                                                                                                                                                                                            |                                                                                                                                                                                                                    | scaffold_8_mRNA_1539.1           | -                           | -                               |
| GF0032215 | 1                             | 0                        | 0                            | 0 Hypothetical protein (1)                                      |                                                                                                                                                                                                                                                                                                                                                                                                            |                                                                                                                                                                                                                    | scaffold_8_mRNA_1538.1           | -                           | -                               |
| GF0032214 | 1                             | 0                        | 0                            | 0 Hypothetical protein (1)                                      |                                                                                                                                                                                                                                                                                                                                                                                                            |                                                                                                                                                                                                                    | scaffold_8_mRNA_1536.1           | -                           | -                               |
| GF0032213 | 1                             | 0                        | 0                            | 0 Hypothetical protein (1)                                      |                                                                                                                                                                                                                                                                                                                                                                                                            |                                                                                                                                                                                                                    | scaffold_8_mRNA_1534.1           | -                           | -                               |
| GF0032212 | 1                             | 0                        | 0                            | 0 Hypothetical protein (1)                                      |                                                                                                                                                                                                                                                                                                                                                                                                            |                                                                                                                                                                                                                    | scaffold_8_mRNA_1528.1           | -                           | -                               |
| GF0032211 | 1                             | 0                        | 0                            | 0 Hypothetical protein (1)                                      |                                                                                                                                                                                                                                                                                                                                                                                                            |                                                                                                                                                                                                                    | scaffold_8_mRNA_1527.1           | -                           | -                               |
| GF0032210 | 1                             | 0                        | 0                            | 0 Hypothetical protein (1)                                      |                                                                                                                                                                                                                                                                                                                                                                                                            |                                                                                                                                                                                                                    | scaffold_8_mRNA_1526.1           | -                           | -                               |
| GF0032209 | 1                             | 0                        | 0                            | 0 Hypothetical protein (1)                                      |                                                                                                                                                                                                                                                                                                                                                                                                            |                                                                                                                                                                                                                    | scaffold_8_mRNA_1525.1           | -                           | -                               |
| GF0032208 | 1                             | 0                        | 0                            | 0 Hypothetical protein (1)                                      |                                                                                                                                                                                                                                                                                                                                                                                                            |                                                                                                                                                                                                                    | scaffold_8_mRNA_1524.1           | -                           | -                               |
| GF0032207 | 1                             | 0                        | 0                            | 0 Hypothetical protein (1)                                      |                                                                                                                                                                                                                                                                                                                                                                                                            |                                                                                                                                                                                                                    | scaffold_8_mRNA_1520.1           | -                           | -                               |
| GF0032206 | 1                             | 0                        | 0                            | 0 Hypothetical protein (1)                                      |                                                                                                                                                                                                                                                                                                                                                                                                            |                                                                                                                                                                                                                    | scaffold_8_mRNA_1519.1           | -                           | -                               |
| GF0032205 | 1                             | 0                        | 0                            | 0 Hypothetical protein (1)                                      |                                                                                                                                                                                                                                                                                                                                                                                                            |                                                                                                                                                                                                                    | scaffold_8_mRNA_1518.1           | -                           | -                               |
| GF0032204 | 1                             | 0                        | 0                            | 0 Hypothetical protein (1)                                      |                                                                                                                                                                                                                                                                                                                                                                                                            |                                                                                                                                                                                                                    | scaffold_8_mRNA_1517.1           | -                           | -                               |
| GF0032203 | 1                             | 0                        | 0                            | 0 Hypothetical protein (1)                                      |                                                                                                                                                                                                                                                                                                                                                                                                            |                                                                                                                                                                                                                    | scaffold_8_mRNA_1511.1           | -                           | -                               |
| GF0032202 | 1                             | 0                        | 0                            | 0 Hypothetical protein (1)                                      |                                                                                                                                                                                                                                                                                                                                                                                                            | Aspartic peptidase domain [IPRO21109] (1); LOG family [IPRO31100] (1)                                                                                                                                              | scaffold_8_mRNA_1509.1           | -                           | -                               |
| GF0032201 | 1                             | 0                        | 0                            | 0 Hypothetical protein (1)                                      |                                                                                                                                                                                                                                                                                                                                                                                                            |                                                                                                                                                                                                                    | scaffold_8_mRNA_1507.1           | -                           | -                               |
| GF0032200 | 1                             | 0                        | 0                            | 0 Hypothetical protein (1)                                      |                                                                                                                                                                                                                                                                                                                                                                                                            |                                                                                                                                                                                                                    | scaffold_8_mRNA_1503.1           | -                           | -                               |
| GF0032199 | 1                             | 0                        | 0                            | 0 Hypothetical protein (1)                                      |                                                                                                                                                                                                                                                                                                                                                                                                            |                                                                                                                                                                                                                    | scaffold_8_mRNA_1498.1           | -                           | -                               |
| GF0032198 | 1                             | 0                        | 0                            | 0 Transposon protein, putative, unclassified, expressed (1)     | regulation of transcription, DNA-templated [GO:0006355 biological_process] (1)                                                                                                                                                                                                                                                                                                                             | FHY3/FAR1 family [IPRO31052] (1); MULE transposase domain [IPRO18289] (1)                                                                                                                                          | scaffold_8_mRNA_1493.1           | -                           | -                               |
| GF0032197 | 1                             | 0                        | 0                            | 0 NBS type disease resistance protein (1)                       | ADP binding [GO:0043531 molecular_function] (1)                                                                                                                                                                                                                                                                                                                                                            | Leucine-rich repeat domain, L domain-like [IPRO32675] (1); NB-ARC [IPRO2152] (1); 8-loop containing nucleoside triphosphate hydrolase [IPRO27417] (1)                                                              | scaffold_8_mRNA_1487.1           | -                           | -                               |
| GF0032196 | 1                             | 0                        | 0                            | 0 Sugar carrier protein C (1)                                   | transmembrane transport [GO:0055085 biological_process] (1); transporter activity [GO:0005215 molecular_function] (1); membrane [GO:0016020 cellular_component] (1); transmembrane transporter activity [GO:0022857 molecular_function] (1); integral component of membrane [GO:0016021 cellular_component] (1); substrate-specific transmembrane transporter activity [GO:0022891 molecular_function] (1) | Sugar transporter, conserved site [IPRO05829] (1); Major facilitator superfamily domain [IPRO20846] (1); Major facilitator, sugar transporter-like [IPRO05828] (1); Sugar/inositol transporter [IPRO03663] (1)     | scaffold_8_mRNA_1482.1           | -                           | -                               |
| GF0032195 | 1                             | 0                        | 0                            | 0 Hypothetical protein (1)                                      |                                                                                                                                                                                                                                                                                                                                                                                                            |                                                                                                                                                                                                                    | scaffold_8_mRNA_1478.1           | -                           | -                               |
| GF0032194 | 1                             | 0                        | 0                            | 0 Hypothetical protein (1)                                      |                                                                                                                                                                                                                                                                                                                                                                                                            | Retrotransposon gag domain [IPRO05162] (1)                                                                                                                                                                         | scaffold_8_mRNA_1472.1           | -                           | -                               |
| GF0032193 | 1                             | 0                        | 0                            | 0 Hypothetical protein (1)                                      |                                                                                                                                                                                                                                                                                                                                                                                                            |                                                                                                                                                                                                                    | scaffold_8_mRNA_1471.1           | -                           | -                               |
| GF0032192 | 1                             | 0                        | 0                            | 0 Hypothetical protein (1)                                      |                                                                                                                                                                                                                                                                                                                                                                                                            |                                                                                                                                                                                                                    | scaffold_8_mRNA_1469.1           | -                           | -                               |
| GF0032191 | 1                             | 0                        | 0                            | 0 Hypothetical protein (1)                                      |                                                                                                                                                                                                                                                                                                                                                                                                            | Retrotransposon gag domain [IPRO05162] (1)                                                                                                                                                                         | scaffold_8_mRNA_1468.1           | -                           | -                               |
| GF0032190 | 1                             | 0                        | 0                            | 0 Zinc knuckle family protein (1)                               | nucleic acid binding [GO:0003676 molecular_function] (1); zinc ion binding [GO:0008270 molecular_function] (1)                                                                                                                                                                                                                                                                                             | Zinc finger, CC-1HC-type [IPRO01878] (1); Domain of unknown function DUF4219 [IPRO25314] (1)                                                                                                                       | scaffold_8_mRNA_1467.1           | -                           | -                               |
| GF0032189 | 1                             | 0                        | 0                            | 0 RNA-directed DNA polymerase (1)                               | nucleic acid binding [GO:0003676 molecular_function] (1); DNA integration [GO:0015074 biological_process] (1); RNA-DNA hybrid ribonuclease activity [GO:0004523 molecular_function] (1)                                                                                                                                                                                                                    | Ribonuclease H domain [IPRO02156] (1); Ribonuclease H-like domain [IPRO12337] (1); Integrase, catalytic core [IPRO01584] (1)                                                                                       | scaffold_8_mRNA_1466.1           | -                           | -                               |
| GF0032188 | 1                             | 0                        | 0                            | 0 Monosaccharide transport protein (1)                          |                                                                                                                                                                                                                                                                                                                                                                                                            |                                                                                                                                                                                                                    | scaffold_8_mRNA_1465.1           | -                           | -                               |
| GF0032187 | 1                             | 0                        | 0                            | 0 Hypothetical protein (1)                                      |                                                                                                                                                                                                                                                                                                                                                                                                            |                                                                                                                                                                                                                    | scaffold_8_mRNA_1463.1           | -                           | -                               |
| GF0032186 | 1                             | 0                        | 0                            | 0 Hypothetical protein (1)                                      |                                                                                                                                                                                                                                                                                                                                                                                                            |                                                                                                                                                                                                                    | scaffold_8_mRNA_1461.1           | -                           | -                               |
| GF0032185 | 1                             | 0                        | 0                            | 0 Hypothetical protein (1)                                      |                                                                                                                                                                                                                                                                                                                                                                                                            | NADP-dependent oxidoreductase domain [IPRO23210] (1); Reverse transcriptase, RNA-dependent DNA polymerase [IPRO13103] (1)                                                                                          | scaffold_8_mRNA_1460.1           | -                           | -                               |
| GF0032184 | 1                             | 0                        | 0                            | 0 Hypothetical protein (1)                                      |                                                                                                                                                                                                                                                                                                                                                                                                            |                                                                                                                                                                                                                    | scaffold_8_mRNA_1456.1           | -                           | -                               |
| GF0032183 | 1                             | 0                        | 0                            | 0 Hypothetical protein (1)                                      |                                                                                                                                                                                                                                                                                                                                                                                                            |                                                                                                                                                                                                                    | scaffold_8_mRNA_1435.1           | -                           | -                               |
| GF0032182 | 1                             | 0                        | 0                            | 0 Naringenin-chalcone synthase (1)                              | metabolic process [GO:0008152 biological_process] (1); catalytic activity [GO:0003824 molecular_function] (1)                                                                                                                                                                                                                                                                                              | Chalcone/stilbene synthase, N-terminal [IPRO1099] (1); Thiolase-like [IPRO16039] (1); Chalcone/stilbene synthase, C-terminal [IPRO12328] (1)                                                                       | scaffold_8_mRNA_1432.1           | -                           | -                               |
| GF0032181 | 1                             | 0                        | 0                            | 0 Hypothetical protein (1)                                      |                                                                                                                                                                                                                                                                                                                                                                                                            |                                                                                                                                                                                                                    | scaffold_8_mRNA_1430.1           | -                           | -                               |
| GF0032180 | 1                             | 0                        | 0                            | 0 Hypothetical protein (1)                                      |                                                                                                                                                                                                                                                                                                                                                                                                            |                                                                                                                                                                                                                    | scaffold_8_mRNA_1429.1           | -                           | -                               |
| GF0032179 | 1                             | 0                        | 0                            | 0 Hypothetical protein (1)                                      |                                                                                                                                                                                                                                                                                                                                                                                                            |                                                                                                                                                                                                                    | scaffold_8_mRNA_1424.1           | -                           | -                               |
| GF0032178 | 1                             | 0                        | 0                            | 0 Hypothetical protein (1)                                      |                                                                                                                                                                                                                                                                                                                                                                                                            |                                                                                                                                                                                                                    | scaffold_8_mRNA_1422.1           | -                           | -                               |
| GF0032177 | 1                             | 0                        | 0                            | 0 Cytoskinin riboside 5'-monophosphate phosphoribohydrolase (1) |                                                                                                                                                                                                                                                                                                                                                                                                            | LOG family [IPRO31100] (1)                                                                                                                                                                                         | scaffold_8_mRNA_1416.1           | -                           | -                               |
| GF0032176 | 1                             | 0                        | 0                            | 0 Hypothetical protein (1)                                      |                                                                                                                                                                                                                                                                                                                                                                                                            |                                                                                                                                                                                                                    | scaffold_8_mRNA_1415.1           | -                           | -                               |
| GF0032175 | 1                             | 0                        | 0                            | 0 Hypothetical protein (1)                                      |                                                                                                                                                                                                                                                                                                                                                                                                            |                                                                                                                                                                                                                    | scaffold_8_mRNA_1414.1           | -                           | -                               |
| GF0032174 | 1                             | 0                        | 0                            | 0 Hypothetical protein (1)                                      |                                                                                                                                                                                                                                                                                                                                                                                                            |                                                                                                                                                                                                                    | scaffold_8_mRNA_1413.1           | -                           | -                               |
| GF0032173 | 1                             | 0                        | 0                            | 0 Hypothetical protein (1)                                      |                                                                                                                                                                                                                                                                                                                                                                                                            |                                                                                                                                                                                                                    | scaffold_8_mRNA_1411.1           | -                           | -                               |
| GF0032172 | 1                             | 0                        | 0                            | 0 Hypothetical protein (1)                                      |                                                                                                                                                                                                                                                                                                                                                                                                            |                                                                                                                                                                                                                    | scaffold_8_mRNA_1410.1           | -                           | -                               |
| GF0032171 | 1                             | 0                        | 0                            | 0 Hypothetical protein (1)                                      |                                                                                                                                                                                                                                                                                                                                                                                                            | Autologous retrotransposon Orf1 [IPRO04312] (1)                                                                                                                                                                    | scaffold_8_mRNA_1403.1           | -                           | -                               |
| GF0032170 | 1                             | 0                        | 0                            | 0 Hypothetical protein (1)                                      |                                                                                                                                                                                                                                                                                                                                                                                                            | LOG family [IPRO31100] (1)                                                                                                                                                                                         | scaffold_8_mRNA_1402.1           | -                           | -                               |
| GF0032169 | 1                             | 0                        | 0                            | 0 Hypothetical protein (1)                                      |                                                                                                                                                                                                                                                                                                                                                                                                            |                                                                                                                                                                                                                    | scaffold_8_mRNA_1401.1           | -                           | -                               |
| GF0032168 | 1                             | 0                        | 0                            | 0 Hypothetical protein (1)                                      |                                                                                                                                                                                                                                                                                                                                                                                                            |                                                                                                                                                                                                                    | scaffold_8_mRNA_1400.1           | -                           | -                               |
| GF0032167 | 1                             | 0                        | 0                            | 0 Hypothetical protein (1)                                      |                                                                                                                                                                                                                                                                                                                                                                                                            | Transposon, En/Spm-like [IPRO04242] (1)                                                                                                                                                                            | scaffold_8_mRNA_1398.1           | -                           | -                               |



| ID        | Num. in <i>C. clematitae</i> | Num. in <i>C. uchiha</i> | Num. in <i>P. trifoliata</i> | Note                                                                    | GO                                                                                                                                                                                                                                                                                                                    | InterPro                                                                                                                                                                                                                                                                                                                                                              | Members in <i>Clematitae</i> | Members in <i>Uchiha</i> | Members in <i>Trifoliata</i> |
|-----------|------------------------------|--------------------------|------------------------------|-------------------------------------------------------------------------|-----------------------------------------------------------------------------------------------------------------------------------------------------------------------------------------------------------------------------------------------------------------------------------------------------------------------|-----------------------------------------------------------------------------------------------------------------------------------------------------------------------------------------------------------------------------------------------------------------------------------------------------------------------------------------------------------------------|------------------------------|--------------------------|------------------------------|
| GF0032166 | 1                            | 0                        | 0                            | 0 Hypothetical protein (1)                                              | iron ion binding [GO:0005506 molecular_function] (1); heme binding [GO:0020337 molecular_function] (1); oxidation-reduction process [GO:0055114 biological_process] (1); oxidoreductase activity, acting on paired donors, with incorporation or reduction of molecular oxygen [GO:0016705 molecular_function] (1)    | Cytochrome P450 [IPR001128] (1); Cytochrome P450, E-class, group I [IPR002401] (1)                                                                                                                                                                                                                                                                                    | scaffold_8_mRNA_1395.1       | -                        | -                            |
| GF0032165 | 1                            | 0                        | 0                            | 0 Cytokinin riboside 5'-monophosphate phosphoribohydrolase (1)          | oxidoreductase activity, acting on paired donors, with incorporation or reduction of molecular oxygen [GO:0016705 molecular_function] (1); oxidation-reduction process [GO:0055114 biological_process] (1); iron ion binding [GO:0005506 molecular_function] (1); heme binding [GO:0020337 molecular_function] (1)    | LOG family [IPR031100] (1)                                                                                                                                                                                                                                                                                                                                            | scaffold_8_mRNA_1394.1       | -                        | -                            |
| GF0032164 | 1                            | 0                        | 0                            | 0 Hypothetical protein (1)                                              | oxidoreductase activity, acting on paired donors, with incorporation or reduction of molecular oxygen [GO:0016705 molecular_function] (1); oxidation-reduction process [GO:0055114 biological_process] (1); iron ion binding [GO:0005506 molecular_function] (1); heme binding [GO:0020337 molecular_function] (1)    | Cytochrome P450 [IPR001128] (1)                                                                                                                                                                                                                                                                                                                                       | scaffold_8_mRNA_1393.1       | -                        | -                            |
| GF0032163 | 1                            | 0                        | 0                            | 0 Cytokinin riboside 5'-monophosphate phosphoribohydrolase (1)          | oxidoreductase activity, acting on paired donors, with incorporation or reduction of molecular oxygen [GO:0016705 molecular_function] (1); oxidation-reduction process [GO:0055114 biological_process] (1); iron ion binding [GO:0005506 molecular_function] (1); heme binding [GO:0020337 molecular_function] (1)    | LOG family [IPR031100] (1)                                                                                                                                                                                                                                                                                                                                            | scaffold_8_mRNA_1391.1       | -                        | -                            |
| GF0032162 | 1                            | 0                        | 0                            | 0 Transposable element protein, putative, (1)                           | Aspartic peptidase domain [IPR021109] (1); Retrotransposon gag domain [IPR005162] (1)                                                                                                                                                                                                                                 | (1); Retrotransposon gag domain [IPR005162] (1)                                                                                                                                                                                                                                                                                                                       | scaffold_8_mRNA_1390.1       | -                        | -                            |
| GF0032161 | 1                            | 0                        | 0                            | 0 Hypothetical protein (1)                                              |                                                                                                                                                                                                                                                                                                                       |                                                                                                                                                                                                                                                                                                                                                                       | scaffold_8_mRNA_1388.1       | -                        | -                            |
| GF0032160 | 1                            | 0                        | 0                            | 0 Hypothetical protein (1)                                              |                                                                                                                                                                                                                                                                                                                       |                                                                                                                                                                                                                                                                                                                                                                       | scaffold_8_mRNA_1386.1       | -                        | -                            |
| GF0032159 | 1                            | 0                        | 0                            | 0 Hypothetical protein (1)                                              | nucleic acid binding [GO:0003676 molecular_function] (1); DNA integration [GO:0015074 biological_process] (1)                                                                                                                                                                                                         | Ribonuclease H-like domain [IPR012337] (1); Integrase, catalytic core [IPR001584] (1)                                                                                                                                                                                                                                                                                 | scaffold_8_mRNA_1383.1       | -                        | -                            |
| GF0032158 | 1                            | 0                        | 0                            | 0 Spc97/Spc98 family of spindle pole body (SPB) component, putative (1) | microtubule organizing center [GO:0005815 cellular_component] (1); gamma-tubulin binding [GO:0043015 molecular_function] (1); microtubule nucleation [GO:0007020 biological_process] (1); microtubule cytoskeleton organization [GO:0000226 biological_process] (1); spindle pole [GO:0009222 cellular_component] (1) | Gamma-tubulin complex component protein [IPR007259] (1)                                                                                                                                                                                                                                                                                                               | scaffold_8_mRNA_1381.1       | -                        | -                            |
| GF0032157 | 1                            | 0                        | 0                            | 0 Hypothetical protein (1)                                              |                                                                                                                                                                                                                                                                                                                       |                                                                                                                                                                                                                                                                                                                                                                       | scaffold_8_mRNA_1378.1       | -                        | -                            |
| GF0032156 | 1                            | 0                        | 0                            | 0 Hypothetical protein (1)                                              |                                                                                                                                                                                                                                                                                                                       |                                                                                                                                                                                                                                                                                                                                                                       | scaffold_8_mRNA_1377.1       | -                        | -                            |
| GF0032155 | 1                            | 0                        | 0                            | 0 Hypothetical protein (1)                                              |                                                                                                                                                                                                                                                                                                                       |                                                                                                                                                                                                                                                                                                                                                                       | scaffold_8_mRNA_1376.1       | -                        | -                            |
| GF0032154 | 1                            | 0                        | 0                            | 0 Hypothetical protein (1)                                              |                                                                                                                                                                                                                                                                                                                       |                                                                                                                                                                                                                                                                                                                                                                       | scaffold_8_mRNA_1374.1       | -                        | -                            |
| GF0032153 | 1                            | 0                        | 0                            | 0 Hypothetical protein (1)                                              | nucleic acid binding [GO:0003676 molecular_function] (1); zinc ion binding [GO:0008270 molecular_function] (1)                                                                                                                                                                                                        | Zinc finger, CCHC-type [IPR001878] (1)                                                                                                                                                                                                                                                                                                                                | scaffold_8_mRNA_1373.1       | -                        | -                            |
| GF0032152 | 1                            | 0                        | 0                            | 0 Hypothetical protein (1)                                              | cysteine-type peptidase activity [GO:0000224 molecular_function] (1); proteolysis [GO:0006508 biological_process] (1)                                                                                                                                                                                                 | Upl1 protease family, C-terminal catalytic domain [IPR003653] (1)                                                                                                                                                                                                                                                                                                     | scaffold_8_mRNA_1372.1       | -                        | -                            |
| GF0032151 | 1                            | 0                        | 0                            | 0 Hypothetical protein (1)                                              |                                                                                                                                                                                                                                                                                                                       |                                                                                                                                                                                                                                                                                                                                                                       | scaffold_8_mRNA_1370.1       | -                        | -                            |
| GF0032150 | 1                            | 0                        | 0                            | 0 Hypothetical protein (1)                                              |                                                                                                                                                                                                                                                                                                                       |                                                                                                                                                                                                                                                                                                                                                                       | scaffold_8_mRNA_1369.1       | -                        | -                            |
| GF0032149 | 1                            | 0                        | 0                            | 0 Hypothetical protein (1)                                              |                                                                                                                                                                                                                                                                                                                       |                                                                                                                                                                                                                                                                                                                                                                       | scaffold_8_mRNA_1368.1       | -                        | -                            |
| GF0032148 | 1                            | 0                        | 0                            | 0 Cytokinin riboside 5'-monophosphate phosphoribohydrolase (1)          | oxidoreductase activity, acting on paired donors, with incorporation or reduction of molecular oxygen [GO:0016705 molecular_function] (1); heme binding [GO:0020337 molecular_function] (1); iron ion binding [GO:0005506 molecular_function] (1)                                                                     | Cytokinin riboside 5'-monophosphate phosphoribohydrolase LOG [IPR005269] (1); LOG family [IPR031100] (1)                                                                                                                                                                                                                                                              | scaffold_8_mRNA_1367.1       | -                        | -                            |
| GF0032147 | 1                            | 0                        | 0                            | 0 Hypothetical protein (1)                                              |                                                                                                                                                                                                                                                                                                                       | MULE transposase domain [IPR018289] (1)                                                                                                                                                                                                                                                                                                                               | scaffold_8_mRNA_1366.1       | -                        | -                            |
| GF0032146 | 1                            | 0                        | 0                            | 0 Cytokinin riboside 5'-monophosphate phosphoribohydrolase (1)          | oxidoreductase activity, acting on paired donors, with incorporation or reduction of molecular oxygen [GO:0016705 molecular_function] (1); heme binding [GO:0020337 molecular_function] (1); iron ion binding [GO:0005506 molecular_function] (1)                                                                     | LOG family [IPR031100] (1)                                                                                                                                                                                                                                                                                                                                            | scaffold_8_mRNA_1360.1       | -                        | -                            |
| GF0032145 | 1                            | 0                        | 0                            | 0 Hypothetical protein (1)                                              |                                                                                                                                                                                                                                                                                                                       |                                                                                                                                                                                                                                                                                                                                                                       | scaffold_8_mRNA_1359.1       | -                        | -                            |
| GF0032144 | 1                            | 0                        | 0                            | 0 40S ribosomal protein S2 (1)                                          | structural constituent of ribosome [GO:0003735 molecular_function] (1); translation [GO:0006412 biological_process] (1); small ribosomal subunit [GO:0015935 cellular_component] (1); ribosome [GO:0005840 cellular_component] (1); RNA binding [GO:0003723 molecular_function] (1)                                   | Ribosomal protein S5 domain 2-type fold [IPR020588] (1); Ribosomal protein S5 [IPR000851] (1); Ribosomal protein S5 domain 2-type fold, subgroup [IPR014721] (1); Ribosomal protein S5, N-terminal [IPR013810] (1); Ribosomal protein S5, eukaryotic/archaeal [IPR005711] (1); Ribosomal protein S5, C-terminal [IPR005324] (1)                                       | scaffold_8_mRNA_1350.1       | -                        | -                            |
| GF0032143 | 1                            | 0                        | 0                            | 0 Hypothetical protein (1)                                              |                                                                                                                                                                                                                                                                                                                       |                                                                                                                                                                                                                                                                                                                                                                       | scaffold_8_mRNA_1349.1       | -                        | -                            |
| GF0032142 | 1                            | 0                        | 0                            | 0 Hypothetical protein (1)                                              |                                                                                                                                                                                                                                                                                                                       |                                                                                                                                                                                                                                                                                                                                                                       | scaffold_8_mRNA_1342.1       | -                        | -                            |
| GF0032141 | 1                            | 0                        | 0                            | 0 Ribonuclease H-like superfamily protein (1)                           | nucleic acid binding [GO:0003676 molecular_function] (1)                                                                                                                                                                                                                                                              | Reverse transcriptase zinc-binding domain [IPR026960] (1); Ribonuclease H-like domain [IPR012337] (1)                                                                                                                                                                                                                                                                 | scaffold_8_mRNA_1335.1       | -                        | -                            |
| GF0032140 | 1                            | 0                        | 0                            | 0 Cytochrome P450 76AD1-like protein (1)                                | oxidation-reduction process [GO:0055114 biological_process] (1); oxidoreductase activity, acting on paired donors, with incorporation or reduction of molecular oxygen [GO:0016705 molecular_function] (1); heme binding [GO:0020337 molecular_function] (1); iron ion binding [GO:0005506 molecular_function] (1)    | Cytochrome P450, E-class, group I [IPR002401] (1); Cytochrome P450, conserved site [IPR017972] (1); Cytochrome P450 [IPR001128] (1)                                                                                                                                                                                                                                   | scaffold_8_mRNA_1329.1       | -                        | -                            |
| GF0032139 | 1                            | 0                        | 0                            | 0 Hypothetical protein (1)                                              |                                                                                                                                                                                                                                                                                                                       |                                                                                                                                                                                                                                                                                                                                                                       | scaffold_8_mRNA_1328.1       | -                        | -                            |
| GF0032138 | 1                            | 0                        | 0                            | 0 Cytokinin riboside 5'-monophosphate phosphoribohydrolase (1)          | oxidoreductase activity, acting on paired donors, with incorporation or reduction of molecular oxygen [GO:0016705 molecular_function] (1); oxidation-reduction process [GO:0055114 biological_process] (1); iron ion binding [GO:0005506 molecular_function] (1); heme binding [GO:0020337 molecular_function] (1)    | LOG family [IPR031100] (1)                                                                                                                                                                                                                                                                                                                                            | scaffold_8_mRNA_1326.1       | -                        | -                            |
| GF0032137 | 1                            | 0                        | 0                            | 0 Cytochrome P450 76AD1-like protein (1)                                | oxidation-reduction process [GO:0055114 biological_process] (1); oxidoreductase activity, acting on paired donors, with incorporation or reduction of molecular oxygen [GO:0016705 molecular_function] (1); heme binding [GO:0020337 molecular_function] (1); iron ion binding [GO:0005506 molecular_function] (1)    | Cytochrome P450, E-class, group I [IPR002401] (1); Cytochrome P450, conserved site [IPR017972] (1); Cytochrome P450 [IPR001128] (1)                                                                                                                                                                                                                                   | scaffold_8_mRNA_1325.1       | -                        | -                            |
| GF0032136 | 1                            | 0                        | 0                            | 0 Putative retroelement pol polyprotein (1)                             |                                                                                                                                                                                                                                                                                                                       |                                                                                                                                                                                                                                                                                                                                                                       | scaffold_8_mRNA_1324.1       | -                        | -                            |
| GF0032135 | 1                            | 0                        | 0                            | 0 Hypothetical protein (1)                                              |                                                                                                                                                                                                                                                                                                                       |                                                                                                                                                                                                                                                                                                                                                                       | scaffold_8_mRNA_1322.1       | -                        | -                            |
| GF0032134 | 1                            | 0                        | 0                            | 0 Hypothetical protein (1)                                              |                                                                                                                                                                                                                                                                                                                       |                                                                                                                                                                                                                                                                                                                                                                       | scaffold_8_mRNA_1317.1       | -                        | -                            |
| GF0032133 | 1                            | 0                        | 0                            | 0 Hypothetical protein (1)                                              | nucleic acid binding [GO:0003676 molecular_function] (1); RNA-DNA hybrid ribonuclease activity [GO:0004523 molecular_function] (1)                                                                                                                                                                                    | Ribonuclease H domain [IPR002156] (1); Ribonuclease H-like domain [IPR012337] (1)                                                                                                                                                                                                                                                                                     | scaffold_8_mRNA_1316.1       | -                        | -                            |
| GF0032132 | 1                            | 0                        | 0                            | 0 Hypothetical protein (1)                                              |                                                                                                                                                                                                                                                                                                                       |                                                                                                                                                                                                                                                                                                                                                                       | scaffold_8_mRNA_1314.1       | -                        | -                            |
| GF0032131 | 1                            | 0                        | 0                            | 0 Hypothetical protein (1)                                              |                                                                                                                                                                                                                                                                                                                       |                                                                                                                                                                                                                                                                                                                                                                       | scaffold_8_mRNA_1311.1       | -                        | -                            |
| GF0032130 | 1                            | 0                        | 0                            | 0 Hypothetical protein (1)                                              |                                                                                                                                                                                                                                                                                                                       |                                                                                                                                                                                                                                                                                                                                                                       | scaffold_8_mRNA_1306.1       | -                        | -                            |
| GF0032129 | 1                            | 0                        | 0                            | 0 Hypothetical protein (1)                                              |                                                                                                                                                                                                                                                                                                                       |                                                                                                                                                                                                                                                                                                                                                                       | scaffold_8_mRNA_1303.1       | -                        | -                            |
| GF0032128 | 1                            | 0                        | 0                            | 0 Hypothetical protein (1)                                              |                                                                                                                                                                                                                                                                                                                       |                                                                                                                                                                                                                                                                                                                                                                       | scaffold_8_mRNA_1302.1       | -                        | -                            |
| GF0032127 | 1                            | 0                        | 0                            | 0 Hypothetical protein (1)                                              |                                                                                                                                                                                                                                                                                                                       |                                                                                                                                                                                                                                                                                                                                                                       | scaffold_8_mRNA_1301.1       | -                        | -                            |
| GF0032126 | 1                            | 0                        | 0                            | 0 Cytochrome P450 76AD1-like protein (1)                                | oxidation-reduction process [GO:0055114 biological_process] (1); oxidoreductase activity, acting on paired donors, with incorporation or reduction of molecular oxygen [GO:0016705 molecular_function] (1)                                                                                                            | Peptidase family A1 domain [IPR033121] (1); Cytochrome P450, conserved site [IPR017972] (1); Pepsin-like domain, plant [IPR034161] (1); Cytochrome P450, E-class, group I [IPR002401] (1); Aspartic peptidase domain [IPR021109] (1); Cytochrome P450 [IPR001128] (1); Xylanase inhibitor, N-terminal [IPR032861] (1); Xylanase inhibitor, C-terminal [IPR032799] (1) | scaffold_8_mRNA_1300.1       | -                        | -                            |
| GF0032125 | 1                            | 0                        | 0                            | 0 Hypothetical protein (1)                                              |                                                                                                                                                                                                                                                                                                                       |                                                                                                                                                                                                                                                                                                                                                                       | scaffold_8_mRNA_13.1         | -                        | -                            |
| GF0032124 | 1                            | 0                        | 0                            | 0 40S ribosomal protein S2 (1)                                          | structural constituent of ribosome [GO:0003735 molecular_function] (1); translation [GO:0006412 biological_process] (1); ribosome [GO:0005840 cellular_component] (1); RNA binding [GO:0003723 molecular_function] (1); small ribosomal subunit [GO:0015935 cellular_component] (1)                                   | Ribosomal protein S5 [IPR000851] (1); Ribosomal protein S5 domain 2-type fold [IPR020588] (1); Ribosomal protein S5, eukaryotic/archaeal [IPR005711] (1); Ribosomal protein S5, N-terminal [IPR013810] (1); Ribosomal protein S5, C-terminal [IPR005324] (1); Ribosomal protein S5 domain 2-type fold, subgroup [IPR014721] (1)                                       | scaffold_8_mRNA_1299.1       | -                        | -                            |
| GF0032123 | 1                            | 0                        | 0                            | 0 Ac-like transposase THELMA13 (1)                                      | DNA binding [GO:0003677 molecular_function] (1); nucleic acid binding [GO:0003676 molecular_function] (1)                                                                                                                                                                                                             | HAT-like transposase, RNase-H fold [IPR025555] (1); Ribonuclease H-like domain [IPR012337] (1)                                                                                                                                                                                                                                                                        | scaffold_8_mRNA_1297.1       | -                        | -                            |
| GF0032122 | 1                            | 0                        | 0                            | 0 Cytokinin riboside 5'-monophosphate phosphoribohydrolase (1)          | oxidoreductase activity, acting on paired donors, with incorporation or reduction of molecular oxygen [GO:0016705 molecular_function] (1); oxidation-reduction process [GO:0055114 biological_process] (1); iron ion binding [GO:0005506 molecular_function] (1); heme binding [GO:0020337 molecular_function] (1)    | Cytokinin riboside 5'-monophosphate phosphoribohydrolase LOG [IPR005269] (1); LOG family [IPR031100] (1)                                                                                                                                                                                                                                                              | scaffold_8_mRNA_1294.1       | -                        | -                            |
| GF0032121 | 1                            | 0                        | 0                            | 0 Hypothetical protein (1)                                              | regulation of transcription, DNA-templated [GO:0006355 biological_process] (1); nucleic acid binding [GO:0003676 molecular_function] (1)                                                                                                                                                                              | Carboxy virus nucleic acid-binding protein [IPR025688] (1)                                                                                                                                                                                                                                                                                                            | scaffold_8_mRNA_1293.1       | -                        | -                            |
| GF0032120 | 1                            | 0                        | 0                            | 0 Hypothetical protein (1)                                              |                                                                                                                                                                                                                                                                                                                       |                                                                                                                                                                                                                                                                                                                                                                       | scaffold_8_mRNA_1292.1       | -                        | -                            |
| GF0032119 | 1                            | 0                        | 0                            | 0 Hypothetical protein (1)                                              |                                                                                                                                                                                                                                                                                                                       |                                                                                                                                                                                                                                                                                                                                                                       | scaffold_8_mRNA_1291.1       | -                        | -                            |
| GF0032118 | 1                            | 0                        | 0                            | 0 Hypothetical protein (1)                                              |                                                                                                                                                                                                                                                                                                                       |                                                                                                                                                                                                                                                                                                                                                                       | scaffold_8_mRNA_1289.1       | -                        | -                            |

| ID        | Num. in <i>C. clementiae</i> | Num. in <i>C. ucinha</i> | Num. in <i>P. trifoliata</i> | Note                                                             | GO                                                                                                                                                                                                                                                | InterPro                                                                                                                                                                                                                                                                                                                                                                                                                                     | Members in <i>C. clementiae</i> | Members in <i>C. ucinha</i> | Members in <i>P. trifoliata</i> |
|-----------|------------------------------|--------------------------|------------------------------|------------------------------------------------------------------|---------------------------------------------------------------------------------------------------------------------------------------------------------------------------------------------------------------------------------------------------|----------------------------------------------------------------------------------------------------------------------------------------------------------------------------------------------------------------------------------------------------------------------------------------------------------------------------------------------------------------------------------------------------------------------------------------------|---------------------------------|-----------------------------|---------------------------------|
| GF0032117 | 1                            | 0                        | 0                            | Cytokinin riboside 5'-monophosphate phosphoribohydrolase (1)     |                                                                                                                                                                                                                                                   | LOG family [IPR031100] (1)                                                                                                                                                                                                                                                                                                                                                                                                                   | scaffold_8_mRNA_1288.1          | -                           | -                               |
| GF0032116 | 1                            | 0                        | 0                            | Hypothetical protein (1)                                         |                                                                                                                                                                                                                                                   |                                                                                                                                                                                                                                                                                                                                                                                                                                              | scaffold_8_mRNA_1287.1          | -                           | -                               |
| GF0032115 | 1                            | 0                        | 0                            | Hypothetical protein (1)                                         |                                                                                                                                                                                                                                                   |                                                                                                                                                                                                                                                                                                                                                                                                                                              | scaffold_8_mRNA_1286.1          | -                           | -                               |
| GF0032114 | 1                            | 0                        | 0                            | Hypothetical protein (1)                                         |                                                                                                                                                                                                                                                   |                                                                                                                                                                                                                                                                                                                                                                                                                                              | scaffold_8_mRNA_1284.1          | -                           | -                               |
| GF0032113 | 1                            | 0                        | 0                            | Hypothetical protein (1)                                         |                                                                                                                                                                                                                                                   |                                                                                                                                                                                                                                                                                                                                                                                                                                              | scaffold_8_mRNA_1283.1          | -                           | -                               |
| GF0032112 | 1                            | 0                        | 0                            | Monosaccharide transport protein (1)                             |                                                                                                                                                                                                                                                   |                                                                                                                                                                                                                                                                                                                                                                                                                                              | scaffold_8_mRNA_1281.1          | -                           | -                               |
| GF0032111 | 1                            | 0                        | 0                            | Hypothetical protein (1)                                         |                                                                                                                                                                                                                                                   |                                                                                                                                                                                                                                                                                                                                                                                                                                              | scaffold_8_mRNA_1274.1          | -                           | -                               |
| GF0032110 | 1                            | 0                        | 0                            | Hypothetical protein (1)                                         |                                                                                                                                                                                                                                                   | Retrotransposon gag domain [IPR005162] (1); LOG family [IPR031100] (1)                                                                                                                                                                                                                                                                                                                                                                       | scaffold_8_mRNA_1272.1          | -                           | -                               |
| GF0032109 | 1                            | 0                        | 0                            | Hypothetical protein (1)                                         |                                                                                                                                                                                                                                                   |                                                                                                                                                                                                                                                                                                                                                                                                                                              | scaffold_8_mRNA_1271.1          | -                           | -                               |
| GF0032108 | 1                            | 0                        | 0                            | Cytokinin riboside 5'-monophosphate phosphoribohydrolase (1)     |                                                                                                                                                                                                                                                   | LOG family [IPR031100] (1)                                                                                                                                                                                                                                                                                                                                                                                                                   | scaffold_8_mRNA_1270.1          | -                           | -                               |
| GF0032107 | 1                            | 0                        | 0                            | Hypothetical protein (1)                                         |                                                                                                                                                                                                                                                   |                                                                                                                                                                                                                                                                                                                                                                                                                                              | scaffold_8_mRNA_1269.1          | -                           | -                               |
| GF0032106 | 1                            | 0                        | 0                            | Cytokinin riboside 5'-monophosphate phosphoribohydrolase (1)     |                                                                                                                                                                                                                                                   | LOG family [IPR031100] (1)                                                                                                                                                                                                                                                                                                                                                                                                                   | scaffold_8_mRNA_1268.1          | -                           | -                               |
| GF0032105 | 1                            | 0                        | 0                            | Hypothetical protein (1)                                         |                                                                                                                                                                                                                                                   |                                                                                                                                                                                                                                                                                                                                                                                                                                              | scaffold_8_mRNA_1263.1          | -                           | -                               |
| GF0032104 | 1                            | 0                        | 0                            | Hypothetical protein (1)                                         |                                                                                                                                                                                                                                                   |                                                                                                                                                                                                                                                                                                                                                                                                                                              | scaffold_8_mRNA_1262.1          | -                           | -                               |
| GF0032103 | 1                            | 0                        | 0                            | 40S ribosomal protein S15a-5 (1)                                 | structural constituent of ribosome [GO:0003735 molecular_function] (1); translation [GO:0006412 biological_process] (1); ribosome [GO:0005840 cellular_component] (1)                                                                             | Ribosomal protein S8 [IPR000630] (1)                                                                                                                                                                                                                                                                                                                                                                                                         | scaffold_8_mRNA_1261.1          | -                           | -                               |
| GF0032102 | 1                            | 0                        | 0                            | Geranyl 10-hydroxylase-like protein (1)                          | oxidoreductase activity, acting on paired donors, with incorporation or reduction of molecular oxygen [GO:0016705 molecular_function] (1); iron ion binding [GO:0005506 molecular_function] (1); heme binding [GO:0020037 molecular_function] (1) | Cytochrome P450 [IPR001128] (1); Cytochrome P450, conserved site [IPR017972] (1); Cytochrome P450, E-class, group 1 [IPR002401] (1)                                                                                                                                                                                                                                                                                                          | scaffold_8_mRNA_1258.1          | -                           | -                               |
| GF0032101 | 1                            | 0                        | 0                            | Hypothetical protein (1)                                         |                                                                                                                                                                                                                                                   |                                                                                                                                                                                                                                                                                                                                                                                                                                              | scaffold_8_mRNA_1257.1          | -                           | -                               |
| GF0032100 | 1                            | 0                        | 0                            | Hypothetical protein (1)                                         | nucleic acid binding [GO:0003676 molecular_function] (1)                                                                                                                                                                                          | Domain of unknown function DUF4371 [IPR025398] (1); Ribonuclease H-like domain [IPR012337] (1)                                                                                                                                                                                                                                                                                                                                               | scaffold_8_mRNA_1256.1          | -                           | -                               |
| GF0032099 | 1                            | 0                        | 0                            | Hypothetical protein (1)                                         |                                                                                                                                                                                                                                                   |                                                                                                                                                                                                                                                                                                                                                                                                                                              | scaffold_8_mRNA_1255.1          | -                           | -                               |
| GF0032098 | 1                            | 0                        | 0                            | Cytokinin riboside 5'-monophosphate phosphoribohydrolase (1)     |                                                                                                                                                                                                                                                   | LOG family [IPR031100] (1)                                                                                                                                                                                                                                                                                                                                                                                                                   | scaffold_8_mRNA_1254.1          | -                           | -                               |
| GF0032097 | 1                            | 0                        | 0                            | Hypothetical protein (1)                                         |                                                                                                                                                                                                                                                   |                                                                                                                                                                                                                                                                                                                                                                                                                                              | scaffold_8_mRNA_1253.1          | -                           | -                               |
| GF0032096 | 1                            | 0                        | 0                            | Hypothetical protein (1)                                         |                                                                                                                                                                                                                                                   |                                                                                                                                                                                                                                                                                                                                                                                                                                              | scaffold_8_mRNA_1249.1          | -                           | -                               |
| GF0032095 | 1                            | 0                        | 0                            | Cytokinin riboside 5'-monophosphate phosphoribohydrolase (1)     |                                                                                                                                                                                                                                                   | LOG family [IPR031100] (1)                                                                                                                                                                                                                                                                                                                                                                                                                   | scaffold_8_mRNA_1248.1          | -                           | -                               |
| GF0032094 | 1                            | 0                        | 0                            | Hypothetical protein (1)                                         |                                                                                                                                                                                                                                                   |                                                                                                                                                                                                                                                                                                                                                                                                                                              | scaffold_8_mRNA_1245.1          | -                           | -                               |
| GF0032093 | 1                            | 0                        | 0                            | Cytokinin riboside 5'-monophosphate phosphoribohydrolase (1)     |                                                                                                                                                                                                                                                   | LOG family [IPR031100] (1)                                                                                                                                                                                                                                                                                                                                                                                                                   | scaffold_8_mRNA_1244.1          | -                           | -                               |
| GF0032092 | 1                            | 0                        | 0                            | Hypothetical protein (1)                                         |                                                                                                                                                                                                                                                   | Gag-polyprotein of LTR copia-type [IPR029472] (1)                                                                                                                                                                                                                                                                                                                                                                                            | scaffold_8_mRNA_1243.1          | -                           | -                               |
| GF0032091 | 1                            | 0                        | 0                            | Hypothetical protein (1)                                         |                                                                                                                                                                                                                                                   |                                                                                                                                                                                                                                                                                                                                                                                                                                              | scaffold_8_mRNA_1242.1          | -                           | -                               |
| GF0032090 | 1                            | 0                        | 0                            | DUF313 domain protein (1)                                        |                                                                                                                                                                                                                                                   | DNA-binding pseudobarrel domain [IPR015300] (1); H3 domain-containing protein [IPR005508] (1)                                                                                                                                                                                                                                                                                                                                                | scaffold_8_mRNA_1239.1          | -                           | -                               |
| GF0032089 | 1                            | 0                        | 0                            | Hypothetical protein (1)                                         | zinc ion binding [GO:0008270 molecular_function] (1)                                                                                                                                                                                              | Zinc finger, SWIM-type [IPR007527] (1); Zinc finger, PMZ-type [IPR006564] (1); MULE transposase domain [IPR018289] (1)                                                                                                                                                                                                                                                                                                                       | scaffold_8_mRNA_1236.1          | -                           | -                               |
| GF0032088 | 1                            | 0                        | 0                            | Hypothetical protein (1)                                         |                                                                                                                                                                                                                                                   |                                                                                                                                                                                                                                                                                                                                                                                                                                              | scaffold_8_mRNA_1235.1          | -                           | -                               |
| GF0032087 | 1                            | 0                        | 0                            | Hypothetical protein (1)                                         | DNA binding [GO:0003677 molecular_function] (1)                                                                                                                                                                                                   | DNA-binding pseudobarrel domain [IPR015300] (1); H3 DNA binding domain [IPR03340] (1)                                                                                                                                                                                                                                                                                                                                                        | scaffold_8_mRNA_1234.1          | -                           | -                               |
| GF0032086 | 1                            | 0                        | 0                            | Cytokinin riboside 5'-monophosphate phosphoribohydrolase (1)     |                                                                                                                                                                                                                                                   | LOG family [IPR031100] (1)                                                                                                                                                                                                                                                                                                                                                                                                                   | scaffold_8_mRNA_1224.1          | -                           | -                               |
| GF0032085 | 1                            | 0                        | 0                            | Hypothetical protein (1)                                         |                                                                                                                                                                                                                                                   |                                                                                                                                                                                                                                                                                                                                                                                                                                              | scaffold_8_mRNA_1217.1          | -                           | -                               |
| GF0032084 | 1                            | 0                        | 0                            | Cytokinin riboside 5'-monophosphate phosphoribohydrolase (1)     |                                                                                                                                                                                                                                                   | LOG family [IPR031100] (1)                                                                                                                                                                                                                                                                                                                                                                                                                   | scaffold_8_mRNA_1216.1          | -                           | -                               |
| GF0032083 | 1                            | 0                        | 0                            | Hypothetical protein (1)                                         |                                                                                                                                                                                                                                                   |                                                                                                                                                                                                                                                                                                                                                                                                                                              | scaffold_8_mRNA_1214.1          | -                           | -                               |
| GF0032082 | 1                            | 0                        | 0                            | Hypothetical protein (1)                                         |                                                                                                                                                                                                                                                   |                                                                                                                                                                                                                                                                                                                                                                                                                                              | scaffold_8_mRNA_1211.1          | -                           | -                               |
| GF0032081 | 1                            | 0                        | 0                            | Cytokinin riboside 5'-monophosphate phosphoribohydrolase (1)     |                                                                                                                                                                                                                                                   | LOG family [IPR031100] (1)                                                                                                                                                                                                                                                                                                                                                                                                                   | scaffold_8_mRNA_1210.1          | -                           | -                               |
| GF0032080 | 1                            | 0                        | 0                            | Hypothetical protein (1)                                         |                                                                                                                                                                                                                                                   |                                                                                                                                                                                                                                                                                                                                                                                                                                              | scaffold_8_mRNA_1209.1          | -                           | -                               |
| GF0032079 | 1                            | 0                        | 0                            | Hypothetical protein (1)                                         |                                                                                                                                                                                                                                                   |                                                                                                                                                                                                                                                                                                                                                                                                                                              | scaffold_8_mRNA_1201.1          | -                           | -                               |
| GF0032078 | 1                            | 0                        | 0                            | Hypothetical protein (1)                                         |                                                                                                                                                                                                                                                   |                                                                                                                                                                                                                                                                                                                                                                                                                                              | scaffold_8_mRNA_1200.1          | -                           | -                               |
| GF0032077 | 1                            | 0                        | 0                            | Hypothetical protein (1)                                         |                                                                                                                                                                                                                                                   |                                                                                                                                                                                                                                                                                                                                                                                                                                              | scaffold_8_mRNA_1194.1          | -                           | -                               |
| GF0032076 | 1                            | 0                        | 0                            | Hypothetical protein (1)                                         |                                                                                                                                                                                                                                                   | Plant disease resistance response protein [IPR004265] (1)                                                                                                                                                                                                                                                                                                                                                                                    | scaffold_8_mRNA_1193.1          | -                           | -                               |
| GF0032075 | 1                            | 0                        | 0                            | Hypothetical protein (1)                                         |                                                                                                                                                                                                                                                   |                                                                                                                                                                                                                                                                                                                                                                                                                                              | scaffold_8_mRNA_119.1           | -                           | -                               |
| GF0032074 | 1                            | 0                        | 0                            | Hypothetical protein (1)                                         |                                                                                                                                                                                                                                                   | Plant disease resistance response protein [IPR004265] (1)                                                                                                                                                                                                                                                                                                                                                                                    | scaffold_8_mRNA_1187.1          | -                           | -                               |
| GF0032073 | 1                            | 0                        | 0                            | Hypothetical protein (1)                                         |                                                                                                                                                                                                                                                   |                                                                                                                                                                                                                                                                                                                                                                                                                                              | scaffold_8_mRNA_1183.1          | -                           | -                               |
| GF0032072 | 1                            | 0                        | 0                            | Hypothetical protein (1)                                         |                                                                                                                                                                                                                                                   |                                                                                                                                                                                                                                                                                                                                                                                                                                              | scaffold_8_mRNA_1182.1          | -                           | -                               |
| GF0032071 | 1                            | 0                        | 0                            | Cytokinin riboside 5'-monophosphate phosphoribohydrolase (1)     |                                                                                                                                                                                                                                                   | LOG family [IPR031100] (1)                                                                                                                                                                                                                                                                                                                                                                                                                   | scaffold_8_mRNA_1181.1          | -                           | -                               |
| GF0032070 | 1                            | 0                        | 0                            | Hypothetical protein (1)                                         |                                                                                                                                                                                                                                                   |                                                                                                                                                                                                                                                                                                                                                                                                                                              | scaffold_8_mRNA_1180.1          | -                           | -                               |
| GF0032069 | 1                            | 0                        | 0                            | Hypothetical protein (1)                                         |                                                                                                                                                                                                                                                   |                                                                                                                                                                                                                                                                                                                                                                                                                                              | scaffold_8_mRNA_1178.1          | -                           | -                               |
| GF0032068 | 1                            | 0                        | 0                            | Hypothetical protein (1)                                         |                                                                                                                                                                                                                                                   |                                                                                                                                                                                                                                                                                                                                                                                                                                              | scaffold_8_mRNA_1164.2          | -                           | -                               |
| GF0032067 | 1                            | 0                        | 0                            | Hypothetical protein (1)                                         |                                                                                                                                                                                                                                                   | Reverse transcriptase, RNA-dependent DNA polymerase [IPR013103] (1)                                                                                                                                                                                                                                                                                                                                                                          | scaffold_8_mRNA_1155.1          | -                           | -                               |
| GF0032066 | 1                            | 0                        | 0                            | Hypothetical protein (1)                                         |                                                                                                                                                                                                                                                   |                                                                                                                                                                                                                                                                                                                                                                                                                                              | scaffold_8_mRNA_1149.1          | -                           | -                               |
| GF0032065 | 1                            | 0                        | 0                            | Cytokinin riboside 5'-monophosphate phosphoribohydrolase (1)     |                                                                                                                                                                                                                                                   | LOG family [IPR031100] (1)                                                                                                                                                                                                                                                                                                                                                                                                                   | scaffold_8_mRNA_1142.1          | -                           | -                               |
| GF0032064 | 1                            | 0                        | 0                            | Hypothetical protein (1)                                         |                                                                                                                                                                                                                                                   |                                                                                                                                                                                                                                                                                                                                                                                                                                              | scaffold_8_mRNA_1141.1          | -                           | -                               |
| GF0032063 | 1                            | 0                        | 0                            | Hypothetical protein (1)                                         |                                                                                                                                                                                                                                                   |                                                                                                                                                                                                                                                                                                                                                                                                                                              | scaffold_8_mRNA_1140.1          | -                           | -                               |
| GF0032062 | 1                            | 0                        | 0                            | Hypothetical protein (1)                                         |                                                                                                                                                                                                                                                   |                                                                                                                                                                                                                                                                                                                                                                                                                                              | scaffold_8_mRNA_1138.1          | -                           | -                               |
| GF0032061 | 1                            | 0                        | 0                            | Hypothetical protein (1)                                         |                                                                                                                                                                                                                                                   |                                                                                                                                                                                                                                                                                                                                                                                                                                              | scaffold_8_mRNA_1137.1          | -                           | -                               |
| GF0032060 | 1                            | 0                        | 0                            | Hypothetical protein (1)                                         |                                                                                                                                                                                                                                                   |                                                                                                                                                                                                                                                                                                                                                                                                                                              | scaffold_8_mRNA_1133.1          | -                           | -                               |
| GF0032059 | 1                            | 0                        | 0                            | Hypothetical protein (1)                                         |                                                                                                                                                                                                                                                   |                                                                                                                                                                                                                                                                                                                                                                                                                                              | scaffold_8_mRNA_1130.1          | -                           | -                               |
| GF0032058 | 1                            | 0                        | 0                            | Putative disease resistance gene NBS-LRR family protein (1)      | ADP binding [GO:0043531 molecular_function] (1); calcium ion binding [GO:0005509 molecular_function] (1)                                                                                                                                          | Class I glutamine amidotransferase-like [IPR029062] (1); Glutamine amidotransferase [IPR017926] (1); Winged helix-turn-helix DNA-binding domain [IPR011991] (1); Leucine-rich repeat domain, L domain-like [IPR032675] (1); EF-hand domain [IPR020285] (1); P-loop containing nucleoside triphosphate hydrolase [IPR027417] (1); NB-ARC [IPR002182] (1); EF-hand 1, calcium-binding site [IPR018247] (1); AAA+ ATPase domain [IPR003593] (1) | scaffold_8_mRNA_1121.1          | -                           | -                               |
| GF0032057 | 1                            | 0                        | 0                            | Disease resistance protein (CC-NBS-LRR class) family protein (1) | ADP binding [GO:0043531 molecular_function] (1)                                                                                                                                                                                                   | P-loop containing nucleoside triphosphate hydrolase [IPR027417] (1); NB-ARC [IPR002182] (1); AAA+ ATPase domain [IPR003593] (1); Leucine-rich repeat domain, L domain-like [IPR032675] (1); Winged helix-turn-helix DNA-binding domain [IPR011991] (1)                                                                                                                                                                                       | scaffold_8_mRNA_1111.1          | -                           | -                               |
| GF0032056 | 1                            | 0                        | 0                            | Hypothetical protein (1)                                         | lipid metabolic process [GO:0006629 biological_process] (1)                                                                                                                                                                                       | Alpha/Beta hydrolase fold [IPR029058] (1); Fungal lipase-like domain [IPR029211] (1)                                                                                                                                                                                                                                                                                                                                                         | scaffold_8_mRNA_1109.1          | -                           | -                               |
| GF0032055 | 1                            | 0                        | 0                            | Auxin-induced protein X10A (1)                                   | response to auxin [GO:0009733 biological_process] (1)                                                                                                                                                                                             | Small auxin-up RNA [IPR003676] (1)                                                                                                                                                                                                                                                                                                                                                                                                           | scaffold_8_mRNA_1100.1          | -                           | -                               |
| GF0032054 | 1                            | 0                        | 0                            | Hypothetical protein (1)                                         |                                                                                                                                                                                                                                                   | Retrotransposon gag domain [IPR005162] (1); Aspartic peptidase domain [IPR021109] (1)                                                                                                                                                                                                                                                                                                                                                        | scaffold_8_mRNA_1090.1          | -                           | -                               |
| GF0032053 | 1                            | 0                        | 0                            | Hypothetical protein (1)                                         |                                                                                                                                                                                                                                                   |                                                                                                                                                                                                                                                                                                                                                                                                                                              | scaffold_8_mRNA_1089.1          | -                           | -                               |
| GF0032052 | 1                            | 0                        | 0                            | Hypothetical protein (1)                                         | nucleic acid binding [GO:0003676 molecular_function] (1)                                                                                                                                                                                          | Ribonuclease H-like domain [IPR012337] (1)                                                                                                                                                                                                                                                                                                                                                                                                   | scaffold_8_mRNA_1084.1          | -                           | -                               |
| GF0032051 | 1                            | 0                        | 0                            | Hypothetical protein (1)                                         |                                                                                                                                                                                                                                                   |                                                                                                                                                                                                                                                                                                                                                                                                                                              | scaffold_8_mRNA_1081.1          | -                           | -                               |
| GF0032050 | 1                            | 0                        | 0                            | Hypothetical protein (1)                                         |                                                                                                                                                                                                                                                   |                                                                                                                                                                                                                                                                                                                                                                                                                                              | scaffold_8_mRNA_1080.1          | -                           | -                               |
| GF0032049 | 1                            | 0                        | 0                            | Hypothetical protein (1)                                         |                                                                                                                                                                                                                                                   |                                                                                                                                                                                                                                                                                                                                                                                                                                              | scaffold_8_mRNA_1076.1          | -                           | -                               |
| GF0032048 | 1                            | 0                        | 0                            | Hypothetical protein (1)                                         |                                                                                                                                                                                                                                                   |                                                                                                                                                                                                                                                                                                                                                                                                                                              | scaffold_8_mRNA_1075.1          | -                           | -                               |
| GF0032047 | 1                            | 0                        | 0                            | Putative retroelement pol polyprotein (1)                        | DNA integration [GO:0015074 biological_process] (1); nucleic acid binding [GO:0003676 molecular_function] (1)                                                                                                                                     | Integrase, catalytic core [IPR001584] (1); Ribonuclease H-like domain [IPR012337] (1)                                                                                                                                                                                                                                                                                                                                                        | scaffold_8_mRNA_1072.1          | -                           | -                               |
| GF0032046 | 1                            | 0                        | 0                            | Hypothetical protein (1)                                         |                                                                                                                                                                                                                                                   | Retrotransposon gag domain [IPR005162] (1)                                                                                                                                                                                                                                                                                                                                                                                                   | scaffold_8_mRNA_1067.1          | -                           | -                               |
| GF0032045 | 1                            | 0                        | 0                            | Retrotransposon gag protein (1)                                  |                                                                                                                                                                                                                                                   | Retrotransposon gag domain [IPR005162] (1)                                                                                                                                                                                                                                                                                                                                                                                                   | scaffold_8_mRNA_1065.1          | -                           | -                               |
| GF0032044 | 1                            | 0                        | 0                            | Hypothetical protein (1)                                         |                                                                                                                                                                                                                                                   |                                                                                                                                                                                                                                                                                                                                                                                                                                              | scaffold_8_mRNA_1064.1          | -                           | -                               |

| ID        | Num. in <i>C. clementinae</i> | Num. in <i>C. uastha</i> | Num. in <i>P. trifoliata</i> | Note                                                               | GO                                                                                                                                                                                                                                                                                                                                                                                                  | InterPro                                                                                                                                                                                                                                                                                                                                                                                                                                                                                                                                                            | Members in <i>C. clementinae</i> | Members in <i>C. uastha</i> | Members in <i>P. trifoliata</i> |
|-----------|-------------------------------|--------------------------|------------------------------|--------------------------------------------------------------------|-----------------------------------------------------------------------------------------------------------------------------------------------------------------------------------------------------------------------------------------------------------------------------------------------------------------------------------------------------------------------------------------------------|---------------------------------------------------------------------------------------------------------------------------------------------------------------------------------------------------------------------------------------------------------------------------------------------------------------------------------------------------------------------------------------------------------------------------------------------------------------------------------------------------------------------------------------------------------------------|----------------------------------|-----------------------------|---------------------------------|
| GF0032043 | 1                             | 0                        | 0                            | 0 Hypothetical protein (1)                                         |                                                                                                                                                                                                                                                                                                                                                                                                     |                                                                                                                                                                                                                                                                                                                                                                                                                                                                                                                                                                     | scaffold_8_mRNA_1063.1           | -                           | -                               |
| GF0032042 | 1                             | 0                        | 0                            | 0 Cytokinin riboside 5'-monophosphate phosphoribohydrolase (1)     |                                                                                                                                                                                                                                                                                                                                                                                                     | Cytokinin riboside 5'-monophosphate phosphoribohydrolase LOG [IPR005269] (1); LOG family [IPR031100] (1)                                                                                                                                                                                                                                                                                                                                                                                                                                                            | scaffold_8_mRNA_1062.1           | -                           | -                               |
| GF0032041 | 1                             | 0                        | 0                            | 0 Hypothetical protein (1)                                         |                                                                                                                                                                                                                                                                                                                                                                                                     |                                                                                                                                                                                                                                                                                                                                                                                                                                                                                                                                                                     | scaffold_8_mRNA_1058.1           | -                           | -                               |
| GF0032040 | 1                             | 0                        | 0                            | 0 Putative RNA-directed DNA polymerase (1)                         |                                                                                                                                                                                                                                                                                                                                                                                                     |                                                                                                                                                                                                                                                                                                                                                                                                                                                                                                                                                                     | scaffold_8_mRNA_1056.1           | -                           | -                               |
| GF0032039 | 1                             | 0                        | 0                            | 0 Hypothetical protein (1)                                         |                                                                                                                                                                                                                                                                                                                                                                                                     | Zinc knuckle CXCXC4HX4C [IPR25836] (1)                                                                                                                                                                                                                                                                                                                                                                                                                                                                                                                              | scaffold_8_mRNA_1055.1           | -                           | -                               |
| GF0032038 | 1                             | 0                        | 0                            | 0 Hypothetical protein (1)                                         |                                                                                                                                                                                                                                                                                                                                                                                                     |                                                                                                                                                                                                                                                                                                                                                                                                                                                                                                                                                                     | scaffold_8_mRNA_1052.1           | -                           | -                               |
| GF0032037 | 1                             | 0                        | 0                            | 0 Hypothetical protein (1)                                         |                                                                                                                                                                                                                                                                                                                                                                                                     |                                                                                                                                                                                                                                                                                                                                                                                                                                                                                                                                                                     | scaffold_8_mRNA_1050.1           | -                           | -                               |
| GF0032036 | 1                             | 0                        | 0                            | 0 Monosaccharide transport protein (1)                             |                                                                                                                                                                                                                                                                                                                                                                                                     |                                                                                                                                                                                                                                                                                                                                                                                                                                                                                                                                                                     | scaffold_8_mRNA_1049.1           | -                           | -                               |
| GF0032035 | 1                             | 0                        | 0                            | 0 Auxin-induced protein X10A (1)                                   | response to auxin [GO:0009733 biological_process] (1)                                                                                                                                                                                                                                                                                                                                               | Small auxin-up RNA [IPR03676] (1)                                                                                                                                                                                                                                                                                                                                                                                                                                                                                                                                   | scaffold_8_mRNA_1046.1           | -                           | -                               |
| GF0032034 | 1                             | 0                        | 0                            | 0 Hypothetical protein (1)                                         |                                                                                                                                                                                                                                                                                                                                                                                                     |                                                                                                                                                                                                                                                                                                                                                                                                                                                                                                                                                                     | scaffold_8_mRNA_1044.1           | -                           | -                               |
| GF0032033 | 1                             | 0                        | 0                            | 0 Hypothetical protein (1)                                         |                                                                                                                                                                                                                                                                                                                                                                                                     |                                                                                                                                                                                                                                                                                                                                                                                                                                                                                                                                                                     | scaffold_8_mRNA_1043.1           | -                           | -                               |
| GF0032032 | 1                             | 0                        | 0                            | 0 Hypothetical protein (1)                                         |                                                                                                                                                                                                                                                                                                                                                                                                     |                                                                                                                                                                                                                                                                                                                                                                                                                                                                                                                                                                     | scaffold_8_mRNA_1028.1           | -                           | -                               |
| GF0032031 | 1                             | 0                        | 0                            | 0 Hypothetical protein (1)                                         |                                                                                                                                                                                                                                                                                                                                                                                                     |                                                                                                                                                                                                                                                                                                                                                                                                                                                                                                                                                                     | scaffold_8_mRNA_1027.1           | -                           | -                               |
| GF0032030 | 1                             | 0                        | 0                            | 0 Hypothetical protein (1)                                         |                                                                                                                                                                                                                                                                                                                                                                                                     |                                                                                                                                                                                                                                                                                                                                                                                                                                                                                                                                                                     | scaffold_8_mRNA_1021.1           | -                           | -                               |
| GF0032029 | 1                             | 0                        | 0                            | 0 Hypothetical protein (1)                                         |                                                                                                                                                                                                                                                                                                                                                                                                     |                                                                                                                                                                                                                                                                                                                                                                                                                                                                                                                                                                     | scaffold_8_mRNA_102.1            | -                           | -                               |
| GF0032028 | 1                             | 0                        | 0                            | 0 NBS-LRR type disease resistance protein (1)                      | ADP binding [GO:0043531 molecular_function] (1)                                                                                                                                                                                                                                                                                                                                                     | Winged helix-turn-helix DNA-binding domain [IPR011991] (1); Glutamine amidotransferase type 2 domain [IPR017932] (1); Leucine-rich repeat domain, L domain-like [IPR032675] (1); P-loop containing nucleoside triphosphate hydrolase [IPR027417] (1); NB-ARC [IPR02182] (1); Nucleophilic aminohydrolases, N-terminal [IPR29055] (1); Phosphoryltransferase-like [IPR29057] (1); AAA+ ATPase domain [IPR03593] (1)                                                                                                                                                  | scaffold_8_mRNA_1016.1           | -                           | -                               |
| GF0032027 | 1                             | 0                        | 0                            | 0 Putative retroelement pol polyprotein (1)                        | DNA integration [GO:0015074 biological_process] (1); nucleic acid binding [GO:0003676 molecular_function] (1)                                                                                                                                                                                                                                                                                       | GAG-pre-integrase domain [IPR025724] (1); Integrase, catalytic core [IPR011584] (1); Reverse transcriptase, RNA-dependent DNA polymerase [IPR013103] (1); Ribonuclease H-like domain [IPR012337] (1)                                                                                                                                                                                                                                                                                                                                                                | scaffold_8_mRNA_1014.1           | -                           | -                               |
| GF0032026 | 1                             | 0                        | 0                            | 0 Hypothetical protein (1)                                         | nucleic acid binding [GO:0003676 molecular_function] (1); oxidoreductase activity [GO:0016491 molecular_function] (1); oxidation-reduction process [GO:0055114 biological_process] (1); zinc ion binding [GO:0008270 molecular_function] (1)                                                                                                                                                        | Endonuclease/oxonuclease/phenolphthase [IPR005135] (1); Aldo keto reductase, conserved site [IPR018170] (1); Zinc finger, CCHC-type [IPR001878] (1); NAD-dependent oxidoreductase domain [IPR023210] (1); Aldo keto reductase [IPR020471] (1); Viral movement protein [IPR028919] (1)                                                                                                                                                                                                                                                                               | scaffold_8_mRNA_1005.1           | -                           | -                               |
| GF0032025 | 1                             | 0                        | 0                            | 0 Hypothetical protein (1)                                         |                                                                                                                                                                                                                                                                                                                                                                                                     |                                                                                                                                                                                                                                                                                                                                                                                                                                                                                                                                                                     | scaffold_8_mRNA_1002.1           | -                           | -                               |
| GF0032024 | 1                             | 0                        | 0                            | 0 Hypothetical protein (1)                                         |                                                                                                                                                                                                                                                                                                                                                                                                     |                                                                                                                                                                                                                                                                                                                                                                                                                                                                                                                                                                     | scaffold_8_mRNA_1000.1           | -                           | -                               |
| GF0032023 | 1                             | 0                        | 0                            | 0 Hypothetical protein (1)                                         |                                                                                                                                                                                                                                                                                                                                                                                                     |                                                                                                                                                                                                                                                                                                                                                                                                                                                                                                                                                                     | scaffold_7_mRNA_995.1            | -                           | -                               |
| GF0032022 | 1                             | 0                        | 0                            | 0 Hypothetical protein (1)                                         |                                                                                                                                                                                                                                                                                                                                                                                                     |                                                                                                                                                                                                                                                                                                                                                                                                                                                                                                                                                                     | scaffold_7_mRNA_982.1            | -                           | -                               |
| GF0032021 | 1                             | 0                        | 0                            | 0 Hypothetical protein (1)                                         |                                                                                                                                                                                                                                                                                                                                                                                                     |                                                                                                                                                                                                                                                                                                                                                                                                                                                                                                                                                                     | scaffold_7_mRNA_977.1            | -                           | -                               |
| GF0032020 | 1                             | 0                        | 0                            | 0 Hypothetical protein (1)                                         |                                                                                                                                                                                                                                                                                                                                                                                                     |                                                                                                                                                                                                                                                                                                                                                                                                                                                                                                                                                                     | scaffold_7_mRNA_972.1            | -                           | -                               |
| GF0032019 | 1                             | 0                        | 0                            | 0 Hypothetical protein (1)                                         |                                                                                                                                                                                                                                                                                                                                                                                                     |                                                                                                                                                                                                                                                                                                                                                                                                                                                                                                                                                                     | scaffold_7_mRNA_961.1            | -                           | -                               |
| GF0032018 | 1                             | 0                        | 0                            | 0 Hypothetical protein (1)                                         |                                                                                                                                                                                                                                                                                                                                                                                                     |                                                                                                                                                                                                                                                                                                                                                                                                                                                                                                                                                                     | scaffold_7_mRNA_955.1            | -                           | -                               |
| GF0032017 | 1                             | 0                        | 0                            | 0 Hypothetical protein (1)                                         | protein binding [GO:0005515 molecular_function] (1)                                                                                                                                                                                                                                                                                                                                                 | Ankyrin repeat-containing domain [IPR020683] (1); Ankyrin repeat [IPR02110] (1)                                                                                                                                                                                                                                                                                                                                                                                                                                                                                     | scaffold_7_mRNA_951.1            | -                           | -                               |
| GF0032016 | 1                             | 0                        | 0                            | 0 Aconitase hydratase (1)                                          | metabolic process [GO:0008152 biological_process] (1)                                                                                                                                                                                                                                                                                                                                               | Aconitase family, 4Fe-4S cluster binding site [IPR018136] (1); Aconitase A/isopropylmalate dehydratase small subunit, swivel domain [IPR000573] (1); Aconitase 3-isopropylmalate dehydratase large subunit, alpha/beta/alpha domain [IPR001030] (1); Aconitase 3-isopropylmalate dehydratase large subunit, alpha/beta/alpha, subdomain 1/3 [IPR015931] (1); Aconitase 3-isopropylmalate dehydratase, swivel [IPR015928] (1); Aconitase/iron-responsive element-binding protein 2 [IPR006249] (1)                                                                   | scaffold_7_mRNA_94.1             | -                           | -                               |
| GF0032015 | 1                             | 0                        | 0                            | 0 Hypothetical protein (1)                                         | nucleosome [GO:0000786 cellular_component] (1); nucleus [GO:0005634 cellular_component] (1); DNA binding [GO:0003677 molecular_function] (1); nucleic acid binding [GO:0003676 molecular_function] (1); ATP binding [GO:0005524 molecular_function] (1); nucleosome assembly [GO:0006334 biological_process] (1)                                                                                    | DEAD/DEAH box helicase domain [IPR011545] (1); ATP-dependent RNA helicase DEAD-box, conserved site [IPR000629] (1); P-loop containing nucleoside triphosphate hydrolase [IPR027417] (1); Helicase superfamily 1c2, ATP-binding domain [IPR014001] (1); RNA helicase, DEAD-box type, Q motif [IPR014014] (1); Linker histone H1/H5, domain H1.5 [IPR005318] (1); Winged helix-turn-helix DNA-binding domain [IPR011991] (1); SANT/Myb domain [IPR001005] (1); Helicase, C-terminal [IPR001650] (1); Myb domain [IPR017930] (1); Homeobox domain-like [IPR000957] (1) | scaffold_7_mRNA_935.1            | -                           | -                               |
| GF0032014 | 1                             | 0                        | 0                            | 0 50S ribosomal protein L34 (1)                                    | translation [GO:0006412 biological_process] (1); intracellular [GO:0005622 cellular_component] (1); structural constituent of ribosome [GO:0003735 molecular_function] (1); ribosome [GO:0005840 cellular_component] (1)                                                                                                                                                                            | Ribosomal protein L34, conserved site [IPR020939] (1); Ribosomal protein L34 [IPR000271] (1)                                                                                                                                                                                                                                                                                                                                                                                                                                                                        | scaffold_7_mRNA_924.1            | -                           | -                               |
| GF0032013 | 1                             | 0                        | 0                            | 0 Hypothetical protein (1)                                         |                                                                                                                                                                                                                                                                                                                                                                                                     |                                                                                                                                                                                                                                                                                                                                                                                                                                                                                                                                                                     | scaffold_7_mRNA_899.1            | -                           | -                               |
| GF0032012 | 1                             | 0                        | 0                            | 0 Hypothetical protein (1)                                         |                                                                                                                                                                                                                                                                                                                                                                                                     |                                                                                                                                                                                                                                                                                                                                                                                                                                                                                                                                                                     | scaffold_7_mRNA_895.1            | -                           | -                               |
| GF0032011 | 1                             | 0                        | 0                            | 0 Hypothetical protein (1)                                         | phosphatase activity [GO:0016791 molecular_function] (1)                                                                                                                                                                                                                                                                                                                                            | Phosphatase PHOSPHO-type [IPR016965] (1)                                                                                                                                                                                                                                                                                                                                                                                                                                                                                                                            | scaffold_7_mRNA_876.1            | -                           | -                               |
| GF0032010 | 1                             | 0                        | 0                            | 0 Hypothetical protein (1)                                         | phosphatase activity [GO:0016791 molecular_function] (1); NADH dehydrogenase (ubiquinone) activity [GO:0008137 molecular_function] (1); quinone binding [GO:0048038 molecular_function] (1); oxidation-reduction process [GO:0055114 biological_process] (1); iron-sulfur cluster binding [GO:0051536 molecular_function] (1); 4 iron, 4 sulfur cluster binding [GO:0051539 molecular_function] (1) | Phosphatase PHOSPHO-type [IPR016965] (1); NADH:ubiquinone oxidoreductase-like, 20kDa subunit [IPR006137] (1); NADH:ubiquinone oxidoreductase, 20 kD subunit [IPR006138] (1)                                                                                                                                                                                                                                                                                                                                                                                         | scaffold_7_mRNA_870.1            | -                           | -                               |
| GF0032008 | 1                             | 0                        | 0                            | 0 Hypothetical protein (1)                                         |                                                                                                                                                                                                                                                                                                                                                                                                     |                                                                                                                                                                                                                                                                                                                                                                                                                                                                                                                                                                     | scaffold_7_mRNA_871.1            | -                           | -                               |
| GF0032007 | 1                             | 0                        | 0                            | 0 Hypothetical protein (1)                                         |                                                                                                                                                                                                                                                                                                                                                                                                     |                                                                                                                                                                                                                                                                                                                                                                                                                                                                                                                                                                     | scaffold_7_mRNA_867.1            | -                           | -                               |
| GF0032006 | 1                             | 0                        | 0                            | 0 Hypothetical protein (1)                                         |                                                                                                                                                                                                                                                                                                                                                                                                     |                                                                                                                                                                                                                                                                                                                                                                                                                                                                                                                                                                     | scaffold_7_mRNA_863.1            | -                           | -                               |
| GF0032005 | 1                             | 0                        | 0                            | 0 Hypothetical protein (1)                                         |                                                                                                                                                                                                                                                                                                                                                                                                     |                                                                                                                                                                                                                                                                                                                                                                                                                                                                                                                                                                     | scaffold_7_mRNA_862.1            | -                           | -                               |
| GF0032004 | 1                             | 0                        | 0                            | 0 Hypothetical protein (1)                                         |                                                                                                                                                                                                                                                                                                                                                                                                     |                                                                                                                                                                                                                                                                                                                                                                                                                                                                                                                                                                     | scaffold_7_mRNA_861.1            | -                           | -                               |
| GF0032003 | 1                             | 0                        | 0                            | 0 Retrotransposon protein, putative, Ty3-<br>gypsy subclass (1)    | DNA integration [GO:0015074 biological_process] (1); RNA-DNA hybrid ribonuclease activity [GO:0004523 molecular_function] (1); nucleic acid binding [GO:0003676 molecular_function] (1)                                                                                                                                                                                                             | Retrotransposon gag domain [IPR005162] (1); Aspartic peptidase domain [IPR021109] (1); Ribonuclease H domain [IPR02156] (1); Integrase, catalytic core [IPR005841] (1); Ribonuclease H-like domain [IPR012337] (1)                                                                                                                                                                                                                                                                                                                                                  | scaffold_7_mRNA_860.1            | -                           | -                               |
| GF0032002 | 1                             | 0                        | 0                            | 0 Serine/arginine-rich-splicing factor SR45A (1)                   | nucleic acid binding [GO:0003676 molecular_function] (1)                                                                                                                                                                                                                                                                                                                                            | RNA recognition motif domain [IPR005094] (1)                                                                                                                                                                                                                                                                                                                                                                                                                                                                                                                        | scaffold_7_mRNA_86.1             | -                           | -                               |
| GF0032001 | 1                             | 0                        | 0                            | 0 Hypothetical protein (1)                                         |                                                                                                                                                                                                                                                                                                                                                                                                     | Leucine-rich repeat domain, L domain-like [IPR032675] (1)                                                                                                                                                                                                                                                                                                                                                                                                                                                                                                           | scaffold_7_mRNA_855.1            | -                           | -                               |
| GF0032000 | 1                             | 0                        | 0                            | 0 Hypothetical protein (1)                                         |                                                                                                                                                                                                                                                                                                                                                                                                     |                                                                                                                                                                                                                                                                                                                                                                                                                                                                                                                                                                     | scaffold_7_mRNA_843.1            | -                           | -                               |
| GF0031999 | 1                             | 0                        | 0                            | 0 Pre-arns-splicing factor rsc1 (1)                                |                                                                                                                                                                                                                                                                                                                                                                                                     | Nepressin [IPR004314] (1); Nepressin activation peptide [IPR025521] (1)                                                                                                                                                                                                                                                                                                                                                                                                                                                                                             | scaffold_7_mRNA_840.1            | -                           | -                               |
| GF0031998 | 1                             | 0                        | 0                            | 0 Monosaccharide transport protein (1)                             |                                                                                                                                                                                                                                                                                                                                                                                                     |                                                                                                                                                                                                                                                                                                                                                                                                                                                                                                                                                                     | scaffold_7_mRNA_816.1            | -                           | -                               |
| GF0031997 | 1                             | 0                        | 0                            | 0 Hypothetical protein (1)                                         |                                                                                                                                                                                                                                                                                                                                                                                                     | Retrotransposon gag domain [IPR005162] (1)                                                                                                                                                                                                                                                                                                                                                                                                                                                                                                                          | scaffold_7_mRNA_815.1            | -                           | -                               |
| GF0031996 | 1                             | 0                        | 0                            | 0 Hypothetical protein (1)                                         |                                                                                                                                                                                                                                                                                                                                                                                                     |                                                                                                                                                                                                                                                                                                                                                                                                                                                                                                                                                                     | scaffold_7_mRNA_806.1            | -                           | -                               |
| GF0031995 | 1                             | 0                        | 0                            | 0 GDSL-like Lipase/Acylhydrolase superfamily protein isoform 2 (1) | hydrolase activity, acting on ester bonds [GO:0016788 molecular_function] (1)                                                                                                                                                                                                                                                                                                                       | GDSL lipase/esterase [IPR001087] (1); SGNH hydrolase-type esterase domain [IPR013830] (1)                                                                                                                                                                                                                                                                                                                                                                                                                                                                           | scaffold_7_mRNA_796.1            | -                           | -                               |

| ID        | Num in <i>C. clementiae</i> | Num in <i>C. uchiha</i> | Num in <i>P. trifoliata</i> | Note                                                                   | GO                                                                                                                                                                                                                                                                                                                                                                                                                                                         | InterPro                                                                                                                                                                                                                                      | Members in <i>C. clementiae</i> | Members in <i>C. uchiha</i> | Members in <i>P. trifoliata</i> |
|-----------|-----------------------------|-------------------------|-----------------------------|------------------------------------------------------------------------|------------------------------------------------------------------------------------------------------------------------------------------------------------------------------------------------------------------------------------------------------------------------------------------------------------------------------------------------------------------------------------------------------------------------------------------------------------|-----------------------------------------------------------------------------------------------------------------------------------------------------------------------------------------------------------------------------------------------|---------------------------------|-----------------------------|---------------------------------|
| GF0031994 | 1                           | 0                       | 0                           | 0 Hypothetical protein (1)                                             | oxidoreductase activity, acting on single donors with incorporation of molecular oxygen [GO:0016701 molecular_function] (1); oxidation-reduction process [GO:0055114 biological_process] (1); oxidoreductase activity [GO:0016499 molecular_function] (1); cellular aromatic compound metabolic process [GO:006725 biological_process] (1); ferrous iron binding [GO:0008198 molecular_function] (1); zinc ion binding [GO:0008270 molecular_function] (1) | Extradiol ring-cleavage dioxygenase, class II enzyme, subunit B [IPRO04183] (1); Extradiol aromatic ring-opening dioxygenase, DODA-type [IPRO14436] (1)                                                                                       | scaffold_7_mRNA_791.1           | -                           | -                               |
| GF0031993 | 1                           | 0                       | 0                           | 0 Hypothetical protein (1)                                             | transferase activity, transferring hexosyl groups [GO:0016558 molecular_function] (1); metabolic process [GO:0008152 biological_process] (1)                                                                                                                                                                                                                                                                                                               | UDP-glucuronosyl-UDP-glucosyltransferase [IPRO02213] (1)                                                                                                                                                                                      | scaffold_7_mRNA_776.2           | -                           | -                               |
| GF0031992 | 1                           | 0                       | 0                           | 0 UDP-glucosyltransferase 85A1 (1)                                     |                                                                                                                                                                                                                                                                                                                                                                                                                                                            |                                                                                                                                                                                                                                               |                                 | -                           | -                               |
| GF0031991 | 1                           | 0                       | 0                           | 0 Cytokinin riboside 5'-monophosphate phosphoribohydrolase (1)         |                                                                                                                                                                                                                                                                                                                                                                                                                                                            | LOG family [IPRO31100] (1); Cytokinin riboside 5'-monophosphate phosphoribohydrolase LOG [IPRO05269] (1)                                                                                                                                      | scaffold_7_mRNA_768.1           | -                           | -                               |
| GF0031990 | 1                           | 0                       | 0                           | 0 ABC transporter G family member 11 (1)                               | ATP binding [GO:0005524 molecular_function] (1); membrane [GO:0016020 cellular_component] (1); ATPase activity [GO:0016887 molecular_function] (1)                                                                                                                                                                                                                                                                                                         | P-loop containing nucleoside triphosphate hydrolase [IPRO27417] (1); AAA+ ATPase domain [IPRO03593] (1); ABC-2 type transporter [IPRO13525] (1); ABC transporter-like [IPRO04359] (1); ABC transporter, conserved site [IPRO17871] (1)        | scaffold_7_mRNA_767.1           | -                           | -                               |
| GF0031989 | 1                           | 0                       | 0                           | 0 Hypothetical protein (1)                                             |                                                                                                                                                                                                                                                                                                                                                                                                                                                            | Zinc finger, TTF-type [IPRO06580] (1); Domain of unknown function DUF4371 [IPRO25398] (1)                                                                                                                                                     | scaffold_7_mRNA_746.1           | -                           | -                               |
| GF0031988 | 1                           | 0                       | 0                           | 0 Histone H3 (1)                                                       | protein heterodimerization activity [GO:0040982 molecular_function] (1); DNA binding [GO:0003677 molecular_function] (1); nucleosome [GO:0000786 cellular_component] (1)                                                                                                                                                                                                                                                                                   | Histone fold [IPRO09072] (1); Histone H3-CENP-A [IPRO00164] (1); Histone H2A/H2B/H3 [IPRO07125] (1)                                                                                                                                           | scaffold_7_mRNA_742.1           | -                           | -                               |
| GF0031987 | 1                           | 0                       | 0                           | 0 Hypothetical protein (1)                                             |                                                                                                                                                                                                                                                                                                                                                                                                                                                            |                                                                                                                                                                                                                                               | scaffold_7_mRNA_729.1           | -                           | -                               |
| GF0031986 | 1                           | 0                       | 0                           | 0 Hypothetical protein (1)                                             | metabolic process [GO:0008152 biological_process] (1); catalytic activity [GO:0003824 molecular_function] (1)                                                                                                                                                                                                                                                                                                                                              | Alkaline phosphatase-like, alpha/beta/alpha [IPRO17849] (1)                                                                                                                                                                                   | scaffold_7_mRNA_716.1           | -                           | -                               |
| GF0031985 | 1                           | 0                       | 0                           | 0 Hypothetical protein (1)                                             | zinc ion binding [GO:0008270 molecular_function] (1); nucleic acid binding [GO:0003676 molecular_function] (1)                                                                                                                                                                                                                                                                                                                                             | Zinc finger, CCHC-type [IPRO01878] (1)                                                                                                                                                                                                        | scaffold_7_mRNA_706.1           | -                           | -                               |
| GF0031984 | 1                           | 0                       | 0                           | 0 Hypothetical protein (1)                                             |                                                                                                                                                                                                                                                                                                                                                                                                                                                            |                                                                                                                                                                                                                                               | scaffold_7_mRNA_702.1           | -                           | -                               |
| GF0031983 | 1                           | 0                       | 0                           | 0 Hypothetical protein (1)                                             |                                                                                                                                                                                                                                                                                                                                                                                                                                                            |                                                                                                                                                                                                                                               | scaffold_7_mRNA_7.1             | -                           | -                               |
| GF0031982 | 1                           | 0                       | 0                           | 0 L-type lectin-domain containing receptor kinase IX.1 (1)             | ATP binding [GO:0005524 molecular_function] (1); protein kinase activity [GO:0004672 molecular_function] (1); protein phosphorylation [GO:0006468 biological_process] (1)                                                                                                                                                                                                                                                                                  | Serine/threonine-protein kinase, active site [IPRO08271] (1); Protein kinase domain [IPRO00719] (1); Protein kinase-like domain [IPRO11009] (1)                                                                                               | scaffold_7_mRNA_683.1           | -                           | -                               |
| GF0031981 | 1                           | 0                       | 0                           | 0 L-type lectin-domain containing receptor kinase IX.1 (1)             | ATP binding [GO:0005524 molecular_function] (1); protein phosphorylation [GO:0006468 biological_process] (1); protein kinase activity [GO:0004672 molecular_function] (1)                                                                                                                                                                                                                                                                                  | Protein kinase-like domain [IPRO11009] (1); Protein kinase domain [IPRO00719] (1)                                                                                                                                                             | scaffold_7_mRNA_681.1           | -                           | -                               |
| GF0031980 | 1                           | 0                       | 0                           | 0 Hypothetical protein (1)                                             | nucleic acid binding [GO:0003676 molecular_function] (1)                                                                                                                                                                                                                                                                                                                                                                                                   | Ribonuclease H-like domain [IPRO12337] (1)                                                                                                                                                                                                    | scaffold_7_mRNA_648.1           | -                           | -                               |
| GF0031979 | 1                           | 0                       | 0                           | 0 Tubulin alpha chain (1)                                              | GTP binding [GO:0005525 molecular_function] (1); microtubule [GO:0005874 cellular_component] (1); structural constituent of cytoskeleton [GO:0005200 molecular_function] (1); microtubule-based process [GO:0007017 biological_process] (1); GTPase activity [GO:0003924 molecular_function] (1)                                                                                                                                                           | Tubulin/FtsZ, GTPase domain [IPRO03098] (1); Tubulin, conserved site [IPRO17975] (1); Tubulin/FtsZ, C-terminal [IPRO08280] (1); Tubulin [IPRO00217] (1); Tubulin/FtsZ, 2-layer sandwich domain [IPRO18316] (1); Alpha tubulin [IPRO02452] (1) | scaffold_7_mRNA_646.1           | -                           | -                               |
| GF0031978 | 1                           | 0                       | 0                           | 0 Hypothetical protein (1)                                             |                                                                                                                                                                                                                                                                                                                                                                                                                                                            |                                                                                                                                                                                                                                               | scaffold_7_mRNA_58.1            | -                           | -                               |
| GF0031977 | 1                           | 0                       | 0                           | 0 Hypothetical protein (1)                                             |                                                                                                                                                                                                                                                                                                                                                                                                                                                            | Endonuclease/exonuclease/phosphatase [IPRO05135] (1)                                                                                                                                                                                          | scaffold_7_mRNA_569.1           | -                           | -                               |
| GF0031976 | 1                           | 0                       | 0                           | 0 Hypothetical protein (1)                                             | nucleic acid binding [GO:0003676 molecular_function] (1); zinc ion binding [GO:0008270 molecular_function] (1)                                                                                                                                                                                                                                                                                                                                             | Zinc knuckle CX2CX4HX4C [IPRO25856] (1); Zinc finger, CCHC-type [IPRO01878] (1)                                                                                                                                                               | scaffold_7_mRNA_568.1           | -                           | -                               |
| GF0031975 | 1                           | 0                       | 0                           | 0 Hypothetical protein (1)                                             |                                                                                                                                                                                                                                                                                                                                                                                                                                                            |                                                                                                                                                                                                                                               | scaffold_7_mRNA_534.1           | -                           | -                               |
| GF0031974 | 1                           | 0                       | 0                           | 0 Cytochrome P450, family 81, subfamily D, polypeptide 8, putative (1) | iron ion binding [GO:0005506 molecular_function] (1); heme binding [GO:0020037 molecular_function] (1); oxidation-reduction process [GO:0055114 biological_process] (1); oxidoreductase activity, acting on paired donors, with incorporation or reduction of molecular oxygen [GO:0016705 molecular_function] (1)                                                                                                                                         | Cytochrome P450 [IPRO01128] (1); Cytochrome P450, E-class, group I [IPRO02401] (1); Cytochrome P450, conserved site [IPRO17972] (1)                                                                                                           | scaffold_7_mRNA_530.1           | -                           | -                               |
| GF0031973 | 1                           | 0                       | 0                           | 0 Hypothetical protein (1)                                             | oxidation-reduction process [GO:0055114 biological_process] (1); oxidoreductase activity, acting on paired donors, with incorporation or reduction of molecular oxygen [GO:0016705 molecular_function] (1); iron ion binding [GO:0005506 molecular_function] (1); heme binding [GO:0020037 molecular_function] (1)                                                                                                                                         | Cytochrome P450 [IPRO01128] (1)                                                                                                                                                                                                               | scaffold_7_mRNA_529.1           | -                           | -                               |
| GF0031972 | 1                           | 0                       | 0                           | 0 UDP-glucosyltransferase 74E1 (1)                                     | metabolic process [GO:0008152 biological_process] (1); transferase activity, transferring hexosyl groups [GO:0016758 molecular_function] (1)                                                                                                                                                                                                                                                                                                               | UDP-glucuronosyl-UDP-glucosyltransferase [IPRO02213] (1)                                                                                                                                                                                      | scaffold_7_mRNA_525.1           | -                           | -                               |
| GF0031971 | 1                           | 0                       | 0                           | 0 Hypothetical protein (1)                                             |                                                                                                                                                                                                                                                                                                                                                                                                                                                            |                                                                                                                                                                                                                                               | scaffold_7_mRNA_524.1           | -                           | -                               |
| GF0031970 | 1                           | 0                       | 0                           | 0 Hypothetical protein (1)                                             |                                                                                                                                                                                                                                                                                                                                                                                                                                                            |                                                                                                                                                                                                                                               | scaffold_7_mRNA_522.1           | -                           | -                               |
| GF0031969 | 1                           | 0                       | 0                           | 0 Zinc finger family protein (1)                                       | nucleic acid binding [GO:0003676 molecular_function] (1)                                                                                                                                                                                                                                                                                                                                                                                                   | Zinc finger C2H2-type [IPRO13087] (1)                                                                                                                                                                                                         | scaffold_7_mRNA_52.1            | -                           | -                               |
| GF0031968 | 1                           | 0                       | 0                           | 0 Hypothetical protein (1)                                             |                                                                                                                                                                                                                                                                                                                                                                                                                                                            |                                                                                                                                                                                                                                               | scaffold_7_mRNA_509.1           | -                           | -                               |
| GF0031967 | 1                           | 0                       | 0                           | 0 Hypothetical protein (1)                                             |                                                                                                                                                                                                                                                                                                                                                                                                                                                            | Retrotransposon gag domain [IPRO05162] (1); Aspartic peptidase domain [IPRO21109] (1)                                                                                                                                                         | scaffold_7_mRNA_499.1           | -                           | -                               |
| GF0031966 | 1                           | 0                       | 0                           | 0 Hypothetical protein (1)                                             |                                                                                                                                                                                                                                                                                                                                                                                                                                                            |                                                                                                                                                                                                                                               | scaffold_7_mRNA_486.1           | -                           | -                               |
| GF0031965 | 1                           | 0                       | 0                           | 0 Hypothetical protein (1)                                             |                                                                                                                                                                                                                                                                                                                                                                                                                                                            |                                                                                                                                                                                                                                               | scaffold_7_mRNA_479.1           | -                           | -                               |
| GF0031964 | 1                           | 0                       | 0                           | 0 Hypothetical protein (1)                                             |                                                                                                                                                                                                                                                                                                                                                                                                                                                            |                                                                                                                                                                                                                                               | scaffold_7_mRNA_463.1           | -                           | -                               |
| GF0031963 | 1                           | 0                       | 0                           | 0 Hypothetical protein (1)                                             |                                                                                                                                                                                                                                                                                                                                                                                                                                                            |                                                                                                                                                                                                                                               | scaffold_7_mRNA_462.1           | -                           | -                               |
| GF0031962 | 1                           | 0                       | 0                           | 0 Hypothetical protein (1)                                             |                                                                                                                                                                                                                                                                                                                                                                                                                                                            |                                                                                                                                                                                                                                               | scaffold_7_mRNA_461.1           | -                           | -                               |
| GF0031961 | 1                           | 0                       | 0                           | 0 Abscisic acid 8'-hydroxylase 1 (1)                                   | monooxygenase activity [GO:0004497 molecular_function] (1); heme binding [GO:0020037 molecular_function] (1); iron ion binding [GO:0005506 molecular_function] (1); oxidoreductase activity, acting on paired donors, with incorporation or reduction of molecular oxygen [GO:0016705 molecular_function] (1); oxidation-reduction process [GO:0055114 biological_process] (1)                                                                             | Cytochrome P450, conserved site [IPRO17972] (1); Cytochrome P450 [IPRO01128] (1); Cytochrome P450, E-class, group IV [IPRO02403] (1)                                                                                                          | scaffold_7_mRNA_445.1           | -                           | -                               |
| GF0031960 | 1                           | 0                       | 0                           | 0 Hypothetical protein (1)                                             |                                                                                                                                                                                                                                                                                                                                                                                                                                                            |                                                                                                                                                                                                                                               | scaffold_7_mRNA_430.1           | -                           | -                               |
| GF0031959 | 1                           | 0                       | 0                           | 0 Hypothetical protein (1)                                             |                                                                                                                                                                                                                                                                                                                                                                                                                                                            |                                                                                                                                                                                                                                               | scaffold_7_mRNA_421.1           | -                           | -                               |
| GF0031958 | 1                           | 0                       | 0                           | 0 Mitogen-activated protein kinase kinase ANP1 (1)                     | protein phosphorylation [GO:0006468 biological_process] (1); protein kinase activity [GO:0004672 molecular_function] (1); ATP binding [GO:0005524 molecular_function] (1)                                                                                                                                                                                                                                                                                  | Protein kinase-like domain [IPRO11009] (1); Protein kinase domain [IPRO00719] (1); Protein kinase, ATP binding site [IPRO17441] (1)                                                                                                           | scaffold_7_mRNA_418.1           | -                           | -                               |
| GF0031957 | 1                           | 0                       | 0                           | 0 LOB domain-containing protein 36 (1)                                 |                                                                                                                                                                                                                                                                                                                                                                                                                                                            | Lateral organ boundaries, LOB [IPRO04885] (1)                                                                                                                                                                                                 | scaffold_7_mRNA_416.1           | -                           | -                               |
| GF0031956 | 1                           | 0                       | 0                           | 0 Hypothetical protein (1)                                             |                                                                                                                                                                                                                                                                                                                                                                                                                                                            |                                                                                                                                                                                                                                               | scaffold_7_mRNA_415.1           | -                           | -                               |
| GF0031955 | 1                           | 0                       | 0                           | 0 Hypothetical protein (1)                                             |                                                                                                                                                                                                                                                                                                                                                                                                                                                            |                                                                                                                                                                                                                                               | scaffold_7_mRNA_403.1           | -                           | -                               |
| GF0031954 | 1                           | 0                       | 0                           | 0 Hypothetical protein (1)                                             | autophagy [GO:0006914 biological_process] (1)                                                                                                                                                                                                                                                                                                                                                                                                              | Autophagy-related protein 101 [IPRO12445] (1)                                                                                                                                                                                                 | scaffold_7_mRNA_398.1           | -                           | -                               |
| GF0031953 | 1                           | 0                       | 0                           | 0 Methyl esterase 1 (1)                                                |                                                                                                                                                                                                                                                                                                                                                                                                                                                            | Alpha/beta hydrolase fold-1 [IPRO00073] (1); Alpha/Beta hydrolase fold [IPRO29058] (1)                                                                                                                                                        | scaffold_7_mRNA_396.1           | -                           | -                               |
| GF0031952 | 1                           | 0                       | 0                           | 0 Farnesyltransferase (1)                                              | isoprenoid biosynthetic process [GO:0008299 biological_process] (1)                                                                                                                                                                                                                                                                                                                                                                                        | Polyprenyl synthetase, conserved site [IPRO33749] (1); Polyprenyl synthetase [IPRO04092] (1); Isoprenoid synthase domain [IPRO08949] (1)                                                                                                      | scaffold_7_mRNA_352.1           | -                           | -                               |
| GF0031951 | 1                           | 0                       | 0                           | 0 RUB1-conjugating enzyme 2, E2 (1)                                    |                                                                                                                                                                                                                                                                                                                                                                                                                                                            | Ubiquitin-conjugating enzyme E2 [IPRO00698] (1); Ubiquitin-conjugating enzyme, active site [IPRO23313] (1); Ubiquitin-conjugating enzyme/RWD-like [IPRO16135] (1)                                                                             | scaffold_7_mRNA_350.1           | -                           | -                               |

| ID        | Num. in <i>C. clematitae</i> | Num. in <i>C. uchiha</i> | Num. in <i>P. trifoliata</i> | Note                                                              | GO                                                                                                                                                                                                                                                                                                                                    | InterPro                                                                                                                                                                                                                                                                                                                                                                                   | Members in <i>C. clematitae</i> | Members in <i>C. uchiha</i> | Members in <i>P. trifoliata</i> |
|-----------|------------------------------|--------------------------|------------------------------|-------------------------------------------------------------------|---------------------------------------------------------------------------------------------------------------------------------------------------------------------------------------------------------------------------------------------------------------------------------------------------------------------------------------|--------------------------------------------------------------------------------------------------------------------------------------------------------------------------------------------------------------------------------------------------------------------------------------------------------------------------------------------------------------------------------------------|---------------------------------|-----------------------------|---------------------------------|
| GF0031950 | 1                            | 0                        | 0                            | Anthocyanidin 3-O-glucosyltransferase 5 (1)                       | metabolic process [GO:0008152 biological_process] (1); transferase activity, transferring hexosyl groups [GO:0016758 molecular_function] (1)                                                                                                                                                                                          | UDP-glucuronosyl/UDP-glucosyltransferase [IPRO02113] (1)                                                                                                                                                                                                                                                                                                                                   | scaffold_7_mRNA_346.1           | -                           | -                               |
| GF0031949 | 1                            | 0                        | 0                            | 0 Hypothetical protein (1)                                        |                                                                                                                                                                                                                                                                                                                                       |                                                                                                                                                                                                                                                                                                                                                                                            | scaffold_7_mRNA_343.1           | -                           | -                               |
| GF0031948 | 1                            | 0                        | 0                            | Cytokinin riboside 5'-monophosphate phosphoribosyltransferase (1) |                                                                                                                                                                                                                                                                                                                                       | LOG family [IPRO31100] (1)                                                                                                                                                                                                                                                                                                                                                                 | scaffold_7_mRNA_342.1           | -                           | -                               |
| GF0031947 | 1                            | 0                        | 0                            | 0 Hypothetical protein (1)                                        |                                                                                                                                                                                                                                                                                                                                       |                                                                                                                                                                                                                                                                                                                                                                                            | scaffold_7_mRNA_33.1            | -                           | -                               |
| GF0031946 | 1                            | 0                        | 0                            | 0 Hypothetical protein (1)                                        |                                                                                                                                                                                                                                                                                                                                       |                                                                                                                                                                                                                                                                                                                                                                                            | scaffold_7_mRNA_308.1           | -                           | -                               |
| GF0031945 | 1                            | 0                        | 0                            | 0 Hypothetical protein (1)                                        |                                                                                                                                                                                                                                                                                                                                       |                                                                                                                                                                                                                                                                                                                                                                                            | scaffold_7_mRNA_307.1           | -                           | -                               |
| GF0031944 | 1                            | 0                        | 0                            | Zinc-finger homeobox protein 6 (1)                                |                                                                                                                                                                                                                                                                                                                                       | ZF-HD homeobox protein, Cys/His-rich dimerisation domain [IPRO06456] (1)                                                                                                                                                                                                                                                                                                                   | scaffold_7_mRNA_291.1           | -                           | -                               |
| GF0031943 | 1                            | 0                        | 0                            | Pentatricopeptide (1)                                             | protein binding [GO:0005515 molecular_function] (1)                                                                                                                                                                                                                                                                                   | Tetranucleotide-like helical domain [IPRO11990] (1); Pentatricopeptide repeat [IPRO2885] (1)                                                                                                                                                                                                                                                                                               | scaffold_7_mRNA_275.1           | -                           | -                               |
| GF0031942 | 1                            | 0                        | 0                            | 0 Hypothetical protein (1)                                        |                                                                                                                                                                                                                                                                                                                                       |                                                                                                                                                                                                                                                                                                                                                                                            | scaffold_7_mRNA_272.1           | -                           | -                               |
| GF0031941 | 1                            | 0                        | 0                            | 0 Hypothetical protein (1)                                        |                                                                                                                                                                                                                                                                                                                                       |                                                                                                                                                                                                                                                                                                                                                                                            | scaffold_7_mRNA_271.1           | -                           | -                               |
| GF0031940 | 1                            | 0                        | 0                            | Tyrosine decarboxylase (1)                                        | carboxy-lyase activity [GO:0016831 molecular_function] (1); carboxylic acid metabolic process [GO:0019752 biological_process] (1); catalytic activity [GO:0003524 molecular_function] (1); cellular amino acid metabolic process [GO:0006520 biological_process] (1); pyridoxal phosphate binding [GO:0030170 molecular_function] (1) | Pyridoxal phosphate-dependent transferase, subdomain 2 [IPRO15422] (1); Pyridoxal phosphate-dependent decarboxylase [IPRO2129] (1); Pyridoxal phosphate-dependent transferase, major region, subdomain 1 [IPRO15421] (1); Pyridoxal phosphate binding site [IPRO21115] (1); Pyridoxal phosphate-dependent transferase [IPRO15424] (1); Aromatic L-amino-acid decarboxylase [IPRO10977] (1) | scaffold_7_mRNA_270.1           | -                           | -                               |
| GF0031939 | 1                            | 0                        | 0                            | 0 Hypothetical protein (1)                                        |                                                                                                                                                                                                                                                                                                                                       |                                                                                                                                                                                                                                                                                                                                                                                            | scaffold_7_mRNA_2697.1          | -                           | -                               |
| GF0031938 | 1                            | 0                        | 0                            | 0 Hypothetical protein (1)                                        | cysteine-type peptidase activity [GO:0008234 molecular_function] (1); proteolysis [GO:0006508 biological_process] (1)                                                                                                                                                                                                                 | Upl1 protease family, C-terminal catalytic domain [IPRO03653] (1)                                                                                                                                                                                                                                                                                                                          | scaffold_7_mRNA_2694.1          | -                           | -                               |
| GF0031937 | 1                            | 0                        | 0                            | 0 Hypothetical protein (1)                                        |                                                                                                                                                                                                                                                                                                                                       |                                                                                                                                                                                                                                                                                                                                                                                            | scaffold_7_mRNA_2692.1          | -                           | -                               |
| GF0031936 | 1                            | 0                        | 0                            | 0 Hypothetical protein (1)                                        |                                                                                                                                                                                                                                                                                                                                       |                                                                                                                                                                                                                                                                                                                                                                                            | scaffold_7_mRNA_2685.1          | -                           | -                               |
| GF0031935 | 1                            | 0                        | 0                            | Protein spindler (1)                                              | integral component of membrane [GO:0016021 cellular_component] (1); transmembrane transport [GO:0055085 biological_process] (1)                                                                                                                                                                                                       | Major facilitator superfamily [IPRO11701] (1); Major facilitator superfamily domain [IPRO20846] (1)                                                                                                                                                                                                                                                                                        | scaffold_7_mRNA_2679.1          | -                           | -                               |
| GF0031934 | 1                            | 0                        | 0                            | Monosaccharide transport protein (1)                              |                                                                                                                                                                                                                                                                                                                                       |                                                                                                                                                                                                                                                                                                                                                                                            | scaffold_7_mRNA_2678.1          | -                           | -                               |
| GF0031933 | 1                            | 0                        | 0                            | 0 Hypothetical protein (1)                                        |                                                                                                                                                                                                                                                                                                                                       | Aspartic peptidase domain [IPRO21109] (1)                                                                                                                                                                                                                                                                                                                                                  | scaffold_7_mRNA_2677.1          | -                           | -                               |
| GF0031932 | 1                            | 0                        | 0                            | 0 Hypothetical protein (1)                                        | nucleic acid binding [GO:0003676 molecular_function] (1)                                                                                                                                                                                                                                                                              | Ribonuclease H-like domain [IPRO12337] (1)                                                                                                                                                                                                                                                                                                                                                 | scaffold_7_mRNA_2670.1          | -                           | -                               |
| GF0031931 | 1                            | 0                        | 0                            | 0 Hypothetical protein (1)                                        |                                                                                                                                                                                                                                                                                                                                       |                                                                                                                                                                                                                                                                                                                                                                                            | scaffold_7_mRNA_2667.1          | -                           | -                               |
| GF0031930 | 1                            | 0                        | 0                            | 0 Hypothetical protein (1)                                        | carbohydrate metabolic process [GO:0005975 biological_process] (1); actin filament binding [GO:0051015 molecular_function] (1); hydrolase activity, hydrolyzing O-glycosyl compounds [GO:0004553 molecular_function] (1); actin filament organization [GO:0007015 biological_process] (1)                                             | HotDog domain [IPRO29069] (1); Glycoside hydrolase, family 5 [IPRO01547] (1); Actin cross-linking [IPRO08999] (1); Fascin [IPRO10431] (1); Glycoside hydrolase superfamily [IPRO17853] (1)                                                                                                                                                                                                 | scaffold_7_mRNA_2655.1          | -                           | -                               |
| GF0031929 | 1                            | 0                        | 0                            | 0 Hypothetical protein (1)                                        |                                                                                                                                                                                                                                                                                                                                       |                                                                                                                                                                                                                                                                                                                                                                                            | scaffold_7_mRNA_2648.1          | -                           | -                               |
| GF0031928 | 1                            | 0                        | 0                            | 0 Hypothetical protein (1)                                        |                                                                                                                                                                                                                                                                                                                                       |                                                                                                                                                                                                                                                                                                                                                                                            | scaffold_7_mRNA_2645.1          | -                           | -                               |
| GF0031927 | 1                            | 0                        | 0                            | 0 Hypothetical protein (1)                                        |                                                                                                                                                                                                                                                                                                                                       |                                                                                                                                                                                                                                                                                                                                                                                            | scaffold_7_mRNA_2643.1          | -                           | -                               |
| GF0031926 | 1                            | 0                        | 0                            | 0 Hypothetical protein (1)                                        | RNA-DNA hybrid ribonuclease activity [GO:0004523 molecular_function] (1); nucleic acid binding [GO:0003676 molecular_function] (1)                                                                                                                                                                                                    | Ribonuclease H domain [IPRO02156] (1); Ribonuclease H-like domain [IPRO12337] (1); Aspartic peptidase domain [IPRO21109] (1); Retinotransposon gag domain [IPRO05162] (1)                                                                                                                                                                                                                  | scaffold_7_mRNA_2642.1          | -                           | -                               |
| GF0031925 | 1                            | 0                        | 0                            | 0 Hypothetical protein (1)                                        |                                                                                                                                                                                                                                                                                                                                       | Domain of unknown function DUF4283 [IPRO25588] (1)                                                                                                                                                                                                                                                                                                                                         | scaffold_7_mRNA_2630.1          | -                           | -                               |
| GF0031924 | 1                            | 0                        | 0                            | 0 Hypothetical protein (1)                                        |                                                                                                                                                                                                                                                                                                                                       | Adenosylhomocysteinase-like [IPRO00043] (1); S-adenosyl-L-homocysteine hydrolase, NAD binding domain [IPRO15878] (1); NAD(P)-binding domain [IPRO16040] (1)                                                                                                                                                                                                                                | scaffold_7_mRNA_2620.1          | -                           | -                               |
| GF0031923 | 1                            | 0                        | 0                            | 0 Hypothetical protein (1)                                        |                                                                                                                                                                                                                                                                                                                                       |                                                                                                                                                                                                                                                                                                                                                                                            | scaffold_7_mRNA_2618.1          | -                           | -                               |
| GF0031922 | 1                            | 0                        | 0                            | 0 Hypothetical protein (1)                                        |                                                                                                                                                                                                                                                                                                                                       |                                                                                                                                                                                                                                                                                                                                                                                            | scaffold_7_mRNA_2617.1          | -                           | -                               |
| GF0031921 | 1                            | 0                        | 0                            | 0 Hypothetical protein (1)                                        |                                                                                                                                                                                                                                                                                                                                       | Short-chain dehydrogenase/reductase SDR [IPRO02347] (1); NAD(P)-binding domain [IPRO16040] (1)                                                                                                                                                                                                                                                                                             | scaffold_7_mRNA_2596.1          | -                           | -                               |
| GF0031920 | 1                            | 0                        | 0                            | 0 Hypothetical protein (1)                                        | nucleic acid binding [GO:0003676 molecular_function] (1)                                                                                                                                                                                                                                                                              | Ribonuclease H-like domain [IPRO12337] (1); Leucine-rich repeat domain, L domain-like [IPRO32675] (1)                                                                                                                                                                                                                                                                                      | scaffold_7_mRNA_2595.1          | -                           | -                               |
| GF0031919 | 1                            | 0                        | 0                            | 0 Hypothetical protein (1)                                        |                                                                                                                                                                                                                                                                                                                                       |                                                                                                                                                                                                                                                                                                                                                                                            | scaffold_7_mRNA_2591.1          | -                           | -                               |
| GF0031918 | 1                            | 0                        | 0                            | 0 Hypothetical protein (1)                                        |                                                                                                                                                                                                                                                                                                                                       |                                                                                                                                                                                                                                                                                                                                                                                            | scaffold_7_mRNA_2587.1          | -                           | -                               |
| GF0031917 | 1                            | 0                        | 0                            | Mitogen activated protein kinase 3 (1)                            | ATP binding [GO:0005524 molecular_function] (1); protein kinase activity [GO:0004672 molecular_function] (1); MAP kinase activity [GO:0004707 molecular_function] (1); protein phosphorylation [GO:0006468 biological_process] (1)                                                                                                    | Serine/threonine-protein kinase, active site [IPRO08271] (1); Protein kinase, ATP binding site [IPRO17441] (1); Protein kinase-like domain [IPRO11009] (1); Mitogen-activated protein (MAP) kinase, conserved site [IPRO03527] (1); Protein kinase domain [IPRO000719] (1)                                                                                                                 | scaffold_7_mRNA_258.1           | -                           | -                               |
| GF0031916 | 1                            | 0                        | 0                            | 0 Hypothetical protein (1)                                        |                                                                                                                                                                                                                                                                                                                                       |                                                                                                                                                                                                                                                                                                                                                                                            | scaffold_7_mRNA_2578.1          | -                           | -                               |
| GF0031915 | 1                            | 0                        | 0                            | 0 Hypothetical protein (1)                                        | nucleic acid binding [GO:0003676 molecular_function] (1); regulation of transcription, DNA-templated [GO:0006355 biological_process] (1)                                                                                                                                                                                              | Carlavirus nucleic acid-binding protein [IPRO02568] (1)                                                                                                                                                                                                                                                                                                                                    | scaffold_7_mRNA_2574.1          | -                           | -                               |
| GF0031914 | 1                            | 0                        | 0                            | 0 Hypothetical protein (1)                                        |                                                                                                                                                                                                                                                                                                                                       |                                                                                                                                                                                                                                                                                                                                                                                            | scaffold_7_mRNA_2571.1          | -                           | -                               |
| GF0031913 | 1                            | 0                        | 0                            | 0 Hypothetical protein (1)                                        |                                                                                                                                                                                                                                                                                                                                       |                                                                                                                                                                                                                                                                                                                                                                                            | scaffold_7_mRNA_257.1           | -                           | -                               |
| GF0031912 | 1                            | 0                        | 0                            | 0 Hypothetical protein (1)                                        |                                                                                                                                                                                                                                                                                                                                       |                                                                                                                                                                                                                                                                                                                                                                                            | scaffold_7_mRNA_2554.1          | -                           | -                               |
| GF0031911 | 1                            | 0                        | 0                            | 0 Hypothetical protein (1)                                        |                                                                                                                                                                                                                                                                                                                                       |                                                                                                                                                                                                                                                                                                                                                                                            | scaffold_7_mRNA_2550.1          | -                           | -                               |
| GF0031910 | 1                            | 0                        | 0                            | 0 Hypothetical protein (1)                                        | zinc ion binding [GO:0008270 molecular_function] (1); nucleic acid binding [GO:0003676 molecular_function] (1)                                                                                                                                                                                                                        | Zinc finger, CCHC-type [IPRO01878] (1); Zinc knuckle CX2CX4HX4C [IPRO25836] (1); Domain of unknown function DUF4283 [IPRO25588] (1)                                                                                                                                                                                                                                                        | scaffold_7_mRNA_2537.1          | -                           | -                               |
| GF0031909 | 1                            | 0                        | 0                            | RanaseH protein (1)                                               | RNA-DNA hybrid ribonuclease activity [GO:0004523 molecular_function] (1); nucleic acid binding [GO:0003676 molecular_function] (1)                                                                                                                                                                                                    | TS2/DPI/HIV-22-related protein [IPRO04345] (1); Ribonuclease H-like domain [IPRO12337] (1); Ribonuclease H domain [IPRO02156] (1)                                                                                                                                                                                                                                                          | scaffold_7_mRNA_2532.1          | -                           | -                               |
| GF0031908 | 1                            | 0                        | 0                            | 0 Hypothetical protein (1)                                        |                                                                                                                                                                                                                                                                                                                                       |                                                                                                                                                                                                                                                                                                                                                                                            | scaffold_7_mRNA_2529.1          | -                           | -                               |
| GF0031907 | 1                            | 0                        | 0                            | 0 Hypothetical protein (1)                                        |                                                                                                                                                                                                                                                                                                                                       |                                                                                                                                                                                                                                                                                                                                                                                            | scaffold_7_mRNA_2524.1          | -                           | -                               |
| GF0031906 | 1                            | 0                        | 0                            | Monosaccharide transport protein (1)                              | heme binding [GO:0020037 molecular_function] (1); iron ion binding [GO:0005506 molecular_function] (1); oxidation-reduction process [GO:0005524 biological_process] (1); oxidoreductase activity, acting on paired donors, with incorporation or reduction of molecular oxygen [GO:0016705 molecular_function] (1)                    | Cytochrome P450 [IPRO01128] (1)                                                                                                                                                                                                                                                                                                                                                            | scaffold_7_mRNA_2523.1          | -                           | -                               |
| GF0031905 | 1                            | 0                        | 0                            | 0 Hypothetical protein (1)                                        |                                                                                                                                                                                                                                                                                                                                       |                                                                                                                                                                                                                                                                                                                                                                                            | scaffold_7_mRNA_2517.1          | -                           | -                               |
| GF0031904 | 1                            | 0                        | 0                            | 0 Hypothetical protein (1)                                        | regulation of transcription, DNA-templated [GO:0006355 biological_process] (1); double-stranded DNA binding [GO:0003690 molecular_function] (1)                                                                                                                                                                                       | Transcription termination factor, mitochondrial/chloroplastic [IPRO03690] (1)                                                                                                                                                                                                                                                                                                              | scaffold_7_mRNA_2513.1          | -                           | -                               |
| GF0031903 | 1                            | 0                        | 0                            | Somatic embryogenesis receptor kinase (1)                         | protein binding [GO:0005515 molecular_function] (1); ATP binding [GO:0005524 molecular_function] (1); protein phosphorylation [GO:0006468 biological_process] (1); protein kinase activity [GO:0004672 molecular_function] (1)                                                                                                        | Protein kinase domain [IPRO000719] (1); Leucine-rich repeat domain, L domain-like [IPRO32675] (1); Protein kinase-like domain [IPRO11009] (1); Leucine-rich repeat-containing N-terminal, plant-type [IPRO13210] (1); Serine/threonine-protein kinase, active site [IPRO08271] (1); Protein kinase, ATP binding site [IPRO17441] (1); Leucine-rich repeat [IPRO01611] (1)                  | scaffold_7_mRNA_2508.1          | -                           | -                               |
| GF0031902 | 1                            | 0                        | 0                            | 0 Hypothetical protein (1)                                        |                                                                                                                                                                                                                                                                                                                                       |                                                                                                                                                                                                                                                                                                                                                                                            | scaffold_7_mRNA_2503.1          | -                           | -                               |
| GF0031901 | 1                            | 0                        | 0                            | 0 Hypothetical protein (1)                                        |                                                                                                                                                                                                                                                                                                                                       |                                                                                                                                                                                                                                                                                                                                                                                            | scaffold_7_mRNA_2501.1          | -                           | -                               |
| GF0031900 | 1                            | 0                        | 0                            | 0 Hypothetical protein (1)                                        |                                                                                                                                                                                                                                                                                                                                       |                                                                                                                                                                                                                                                                                                                                                                                            | scaffold_7_mRNA_2487.1          | -                           | -                               |
| GF0031899 | 1                            | 0                        | 0                            | 0 Hypothetical protein (1)                                        |                                                                                                                                                                                                                                                                                                                                       |                                                                                                                                                                                                                                                                                                                                                                                            | scaffold_7_mRNA_248.1           | -                           | -                               |
| GF0031898 | 1                            | 0                        | 0                            | Elongation factor 1-beta (1)                                      | translational elongation [GO:0006414 biological_process] (1); translation elongation factor activity [GO:0003746 molecular_function] (1)                                                                                                                                                                                              | Translation elongation factor EF1B/ribosomal protein S6 [IPRO14717] (1); Translation elongation factor EF1B, beta/delta subunit, guanine nucleotide exchange domain [IPRO14038] (1); Glutathione S-transferase, C-terminal-like [IPRO10987] (1)                                                                                                                                            | scaffold_7_mRNA_2475.1          | -                           | -                               |

| ID        | Num in <i>C. clementinae</i> | Num in <i>C. uchiha</i> | Num in <i>P. trifoliata</i> | Note | GO                                                                | InterPro                                                                                                                                                                                                                                                                    | Members in <i>C. clementinae</i>                                                                                                                                                                                                                                                                                                                                                                                                                                                                                                     | Members in <i>C. uchiha</i> | Members in <i>P. trifoliata</i> |
|-----------|------------------------------|-------------------------|-----------------------------|------|-------------------------------------------------------------------|-----------------------------------------------------------------------------------------------------------------------------------------------------------------------------------------------------------------------------------------------------------------------------|--------------------------------------------------------------------------------------------------------------------------------------------------------------------------------------------------------------------------------------------------------------------------------------------------------------------------------------------------------------------------------------------------------------------------------------------------------------------------------------------------------------------------------------|-----------------------------|---------------------------------|
| GF0031897 | 1                            | 0                       | 0                           | 0    | guanylate kinase (1)                                              | guanylate kinase, conserved site [IPRO20590] (1); P-loop containing nucleoside triphosphate hydrolase [IPRO27471] (1); Guanylate kinase/L-type calcium channel beta subunit [IPRO08145] (1); Guanylate kinase-like domain [IPRO08144] (1); Guanylate kinase [IPRO17665] (1) | scaffold_7_mRNA_2474.1                                                                                                                                                                                                                                                                                                                                                                                                                                                                                                               | -                           | -                               |
| GF0031896 | 1                            | 0                       | 0                           | 0    | Cytosolic ribosome 5'-monophosphate phosphoribosyltransferase (1) | LOG family [IPRO31100] (1)                                                                                                                                                                                                                                                  | scaffold_7_mRNA_2467.1                                                                                                                                                                                                                                                                                                                                                                                                                                                                                                               | -                           | -                               |
| GF0031895 | 1                            | 0                       | 0                           | 0    | Hypothetical protein (1)                                          |                                                                                                                                                                                                                                                                             | scaffold_7_mRNA_2466.1                                                                                                                                                                                                                                                                                                                                                                                                                                                                                                               | -                           | -                               |
| GF0031894 | 1                            | 0                       | 0                           | 0    | Hypothetical protein (1)                                          |                                                                                                                                                                                                                                                                             | scaffold_7_mRNA_2465.1                                                                                                                                                                                                                                                                                                                                                                                                                                                                                                               | -                           | -                               |
| GF0031893 | 1                            | 0                       | 0                           | 0    | Vinorelbine synthase (1)                                          | Transferase [IPRO03480] (1)                                                                                                                                                                                                                                                 | scaffold_7_mRNA_2463.1                                                                                                                                                                                                                                                                                                                                                                                                                                                                                                               | -                           | -                               |
| GF0031892 | 1                            | 0                       | 0                           | 0    | Hypothetical protein (1)                                          |                                                                                                                                                                                                                                                                             | scaffold_7_mRNA_2453.1                                                                                                                                                                                                                                                                                                                                                                                                                                                                                                               | -                           | -                               |
| GF0031891 | 1                            | 0                       | 0                           | 0    | Hypothetical protein (1)                                          | Retrotransposon gag domain [IPRO05162] (1)                                                                                                                                                                                                                                  | scaffold_7_mRNA_2445.1                                                                                                                                                                                                                                                                                                                                                                                                                                                                                                               | -                           | -                               |
| GF0031890 | 1                            | 0                       | 0                           | 0    | Hypothetical protein (1)                                          | zinc ion binding [GO:0008270 molecular_function] (1); nucleic acid binding [GO:0003676 molecular_function] (1)                                                                                                                                                              | Zinc finger, CCHC-type [IPRO01878] (1)                                                                                                                                                                                                                                                                                                                                                                                                                                                                                               | scaffold_7_mRNA_2442.1      | -                               |
| GF0031889 | 1                            | 0                       | 0                           | 0    | Hypothetical protein (1)                                          |                                                                                                                                                                                                                                                                             | scaffold_7_mRNA_2437.1                                                                                                                                                                                                                                                                                                                                                                                                                                                                                                               | -                           | -                               |
| GF0031888 | 1                            | 0                       | 0                           | 0    | Hypothetical protein (1)                                          | methyltransferase activity [GO:0008168 molecular_function] (1); O-methyltransferase activity [GO:0008171 molecular_function] (1)                                                                                                                                            | S-adenosyl-L-methionine-dependent methyltransferase [IPRO29063] (1); O-methyltransferase COMT-type [IPRO16461] (1); O-methyltransferase, family 2 [IPRO1077] (1)                                                                                                                                                                                                                                                                                                                                                                     | scaffold_7_mRNA_2435.1      | -                               |
| GF0031887 | 1                            | 0                       | 0                           | 0    | Hypothetical protein (1)                                          |                                                                                                                                                                                                                                                                             | scaffold_7_mRNA_2434.1                                                                                                                                                                                                                                                                                                                                                                                                                                                                                                               | -                           | -                               |
| GF0031886 | 1                            | 0                       | 0                           | 0    | Caffeoyl-CoA O-methyltransferase (1)                              | O-methyltransferase activity [GO:0008171 molecular_function] (1); protein dimerization activity [GO:0046983 molecular_function] (1); methyltransferase activity [GO:0008168 molecular_function] (1)                                                                         | O-methyltransferase COMT-type [IPRO16461] (1); Plant methyltransferase dimerisation [IPRO12967] (1); O-methyltransferase, family 2 [IPRO1077] (1); Winged helix-turn-helix DNA-binding domain [IPRO11991] (1); S-adenosyl-L-methionine-dependent methyltransferase [IPRO29063] (1)                                                                                                                                                                                                                                                   | scaffold_7_mRNA_2432.1      | -                               |
| GF0031885 | 1                            | 0                       | 0                           | 0    | Hypothetical protein (1)                                          |                                                                                                                                                                                                                                                                             | scaffold_7_mRNA_2429.1                                                                                                                                                                                                                                                                                                                                                                                                                                                                                                               | -                           | -                               |
| GF0031884 | 1                            | 0                       | 0                           | 0    | Hypothetical protein (1)                                          | oxidation-reduction process [GO:0055114 biological_process] (1); oxidoreductase activity [GO:0016491 molecular_function] (1)                                                                                                                                                | Oxoglutarate/iron-dependent dioxygenase [IPRO05123] (1); Thiamin diphosphate-binding fold [IPRO29061] (1); Non-haem dioxygenase N-terminal domain [IPRO26992] (1); Isopenicillin N synthase-like [IPRO27443] (1)                                                                                                                                                                                                                                                                                                                     | scaffold_7_mRNA_2407.1      | -                               |
| GF0031883 | 1                            | 0                       | 0                           | 0    | Hypothetical protein (1)                                          |                                                                                                                                                                                                                                                                             | scaffold_7_mRNA_2405.1                                                                                                                                                                                                                                                                                                                                                                                                                                                                                                               | -                           | -                               |
| GF0031882 | 1                            | 0                       | 0                           | 0    | Monosaccharide transport protein (1)                              |                                                                                                                                                                                                                                                                             | scaffold_7_mRNA_2401.1                                                                                                                                                                                                                                                                                                                                                                                                                                                                                                               | -                           | -                               |
| GF0031881 | 1                            | 0                       | 0                           | 0    | Hypothetical protein (1)                                          | Aspartic peptidase domain [IPRO21109] (1)                                                                                                                                                                                                                                   | scaffold_7_mRNA_2400.1                                                                                                                                                                                                                                                                                                                                                                                                                                                                                                               | -                           | -                               |
| GF0031880 | 1                            | 0                       | 0                           | 0    | Hypothetical protein (1)                                          |                                                                                                                                                                                                                                                                             | scaffold_7_mRNA_2378.1                                                                                                                                                                                                                                                                                                                                                                                                                                                                                                               | -                           | -                               |
| GF0031879 | 1                            | 0                       | 0                           | 0    | Hypothetical protein (1)                                          |                                                                                                                                                                                                                                                                             | scaffold_7_mRNA_2372.1                                                                                                                                                                                                                                                                                                                                                                                                                                                                                                               | -                           | -                               |
| GF0031878 | 1                            | 0                       | 0                           | 0    | Hypothetical protein (1)                                          |                                                                                                                                                                                                                                                                             | scaffold_7_mRNA_2366.1                                                                                                                                                                                                                                                                                                                                                                                                                                                                                                               | -                           | -                               |
| GF0031877 | 1                            | 0                       | 0                           | 0    | Hypothetical protein (1)                                          | Ribosomal protein L18c:L15P [IPRO21131] (1)                                                                                                                                                                                                                                 | scaffold_7_mRNA_2365.1                                                                                                                                                                                                                                                                                                                                                                                                                                                                                                               | -                           | -                               |
| GF0031876 | 1                            | 0                       | 0                           | 0    | Hypothetical protein (1)                                          |                                                                                                                                                                                                                                                                             | scaffold_7_mRNA_2363.1                                                                                                                                                                                                                                                                                                                                                                                                                                                                                                               | -                           | -                               |
| GF0031875 | 1                            | 0                       | 0                           | 0    | Hypothetical protein (1)                                          |                                                                                                                                                                                                                                                                             | scaffold_7_mRNA_2361.1                                                                                                                                                                                                                                                                                                                                                                                                                                                                                                               | -                           | -                               |
| GF0031874 | 1                            | 0                       | 0                           | 0    | Hypothetical protein (1)                                          |                                                                                                                                                                                                                                                                             | scaffold_7_mRNA_2359.1                                                                                                                                                                                                                                                                                                                                                                                                                                                                                                               | -                           | -                               |
| GF0031873 | 1                            | 0                       | 0                           | 0    | Hypothetical protein (1)                                          |                                                                                                                                                                                                                                                                             | scaffold_7_mRNA_2358.1                                                                                                                                                                                                                                                                                                                                                                                                                                                                                                               | -                           | -                               |
| GF0031872 | 1                            | 0                       | 0                           | 0    | Hypothetical protein (1)                                          |                                                                                                                                                                                                                                                                             | scaffold_7_mRNA_2350.1                                                                                                                                                                                                                                                                                                                                                                                                                                                                                                               | -                           | -                               |
| GF0031871 | 1                            | 0                       | 0                           | 0    | Hypothetical protein (1)                                          |                                                                                                                                                                                                                                                                             | scaffold_7_mRNA_2348.1                                                                                                                                                                                                                                                                                                                                                                                                                                                                                                               | -                           | -                               |
| GF0031870 | 1                            | 0                       | 0                           | 0    | Hypothetical protein (1)                                          | nucleic acid binding [GO:0003676 molecular_function] (1)                                                                                                                                                                                                                    | Ribonuclease H-like domain [IPRO12337] (1)                                                                                                                                                                                                                                                                                                                                                                                                                                                                                           | scaffold_7_mRNA_2340.1      | -                               |
| GF0031869 | 1                            | 0                       | 0                           | 0    | Hypothetical protein (1)                                          |                                                                                                                                                                                                                                                                             | scaffold_7_mRNA_2330.1                                                                                                                                                                                                                                                                                                                                                                                                                                                                                                               | -                           | -                               |
| GF0031868 | 1                            | 0                       | 0                           | 0    | Hypothetical protein (1)                                          | nucleic acid binding [GO:0003676 molecular_function] (1); DNA binding [GO:0003677 molecular_function] (1)                                                                                                                                                                   | Zinc finger, C2H2-type [IPRO13087] (1); Zinc finger, BED-type [IPRO03656] (1)                                                                                                                                                                                                                                                                                                                                                                                                                                                        | scaffold_7_mRNA_2323.1      | -                               |
| GF0031867 | 1                            | 0                       | 0                           | 0    | Hypothetical protein (1)                                          |                                                                                                                                                                                                                                                                             | scaffold_7_mRNA_2316.1                                                                                                                                                                                                                                                                                                                                                                                                                                                                                                               | -                           | -                               |
| GF0031866 | 1                            | 0                       | 0                           | 0    | Hypothetical protein (1)                                          |                                                                                                                                                                                                                                                                             | scaffold_7_mRNA_2313.1                                                                                                                                                                                                                                                                                                                                                                                                                                                                                                               | -                           | -                               |
| GF0031865 | 1                            | 0                       | 0                           | 0    | Hypothetical protein (1)                                          |                                                                                                                                                                                                                                                                             | scaffold_7_mRNA_2299.1                                                                                                                                                                                                                                                                                                                                                                                                                                                                                                               | -                           | -                               |
| GF0031864 | 1                            | 0                       | 0                           | 0    | Hypothetical protein (1)                                          |                                                                                                                                                                                                                                                                             | scaffold_7_mRNA_2295.1                                                                                                                                                                                                                                                                                                                                                                                                                                                                                                               | -                           | -                               |
| GF0031863 | 1                            | 0                       | 0                           | 0    | Hypothetical protein (1)                                          |                                                                                                                                                                                                                                                                             | scaffold_7_mRNA_2293.1                                                                                                                                                                                                                                                                                                                                                                                                                                                                                                               | -                           | -                               |
| GF0031862 | 1                            | 0                       | 0                           | 0    | Hypothetical protein (1)                                          |                                                                                                                                                                                                                                                                             | scaffold_7_mRNA_2292.1                                                                                                                                                                                                                                                                                                                                                                                                                                                                                                               | -                           | -                               |
| GF0031861 | 1                            | 0                       | 0                           | 0    | Hypothetical protein (1)                                          |                                                                                                                                                                                                                                                                             | scaffold_7_mRNA_2290.1                                                                                                                                                                                                                                                                                                                                                                                                                                                                                                               | -                           | -                               |
| GF0031860 | 1                            | 0                       | 0                           | 0    | Hypothetical protein (1)                                          | U2AF [GO:0089701 cellular_component] (1); RNA binding [GO:0003723 molecular_function] (1); nucleic acid binding [GO:0003676 molecular_function] (1); mRNA splicing via spliceosome [GO:0000398 biological_process] (1)                                                      | U2 auxiliary factor small subunit [IPRO09145] (1); RNA recognition motif domain, eukaryote [IPRO03954] (1); RNA recognition motif domain [IPRO00504] (1)                                                                                                                                                                                                                                                                                                                                                                             | scaffold_7_mRNA_2267.1      | -                               |
| GF0031859 | 1                            | 0                       | 0                           | 0    | Hypothetical protein (1)                                          |                                                                                                                                                                                                                                                                             | scaffold_7_mRNA_2252.1                                                                                                                                                                                                                                                                                                                                                                                                                                                                                                               | -                           | -                               |
| GF0031858 | 1                            | 0                       | 0                           | 0    | Non-LTR retroelement reverse transcriptase-like (1)               | RNA-DNA hybrid ribonuclease activity [GO:0004523 molecular_function] (1); nucleic acid binding [GO:0003676 molecular_function] (1)                                                                                                                                          | Ribonuclease H-like domain [IPRO12337] (1); Reverse transcriptase zinc-binding domain [IPRO26960] (1); Ribonuclease H domain [IPRO02156] (1); TIS22/DP1V/A22-related protein [IPRO04345] (1)                                                                                                                                                                                                                                                                                                                                         | scaffold_7_mRNA_225.1       | -                               |
| GF0031857 | 1                            | 0                       | 0                           | 0    | Hypothetical protein (1)                                          |                                                                                                                                                                                                                                                                             | scaffold_7_mRNA_2249.1                                                                                                                                                                                                                                                                                                                                                                                                                                                                                                               | -                           | -                               |
| GF0031856 | 1                            | 0                       | 0                           | 0    | Hypothetical protein (1)                                          | Endonuclease/exonuclease/phosphatase [IPRO05155] (1)                                                                                                                                                                                                                        | scaffold_7_mRNA_2248.1                                                                                                                                                                                                                                                                                                                                                                                                                                                                                                               | -                           | -                               |
| GF0031855 | 1                            | 0                       | 0                           | 0    | Hypothetical protein (1)                                          |                                                                                                                                                                                                                                                                             | scaffold_7_mRNA_2244.1                                                                                                                                                                                                                                                                                                                                                                                                                                                                                                               | -                           | -                               |
| GF0031854 | 1                            | 0                       | 0                           | 0    | Hypothetical protein (1)                                          |                                                                                                                                                                                                                                                                             | scaffold_7_mRNA_2239.1                                                                                                                                                                                                                                                                                                                                                                                                                                                                                                               | -                           | -                               |
| GF0031853 | 1                            | 0                       | 0                           | 0    | Hypothetical protein (1)                                          |                                                                                                                                                                                                                                                                             | scaffold_7_mRNA_2235.1                                                                                                                                                                                                                                                                                                                                                                                                                                                                                                               | -                           | -                               |
| GF0031852 | 1                            | 0                       | 0                           | 0    | Hypothetical protein (1)                                          |                                                                                                                                                                                                                                                                             | scaffold_7_mRNA_2230.1                                                                                                                                                                                                                                                                                                                                                                                                                                                                                                               | -                           | -                               |
| GF0031851 | 1                            | 0                       | 0                           | 0    | Hypothetical protein (1)                                          | ATP binding [GO:0005524 molecular_function] (1); protein kinase activity [GO:0004672 molecular_function] (1); protein phosphorylation [GO:0006468 biological_process] (1)                                                                                                   | Protein kinase domain [IPRO00719] (1); Protein kinase-like domain [IPRO11009] (1)                                                                                                                                                                                                                                                                                                                                                                                                                                                    | scaffold_7_mRNA_2229.1      | -                               |
| GF0031850 | 1                            | 0                       | 0                           | 0    | Hypothetical protein (1)                                          |                                                                                                                                                                                                                                                                             | scaffold_7_mRNA_2226.1                                                                                                                                                                                                                                                                                                                                                                                                                                                                                                               | -                           | -                               |
| GF0031849 | 1                            | 0                       | 0                           | 0    | G-type lectin S-receptor-like serine/threonine-protein kinase (1) | ATP binding [GO:0005524 molecular_function] (1); protein serine/threonine kinase activity [GO:0004674 molecular_function] (1); protein kinase activity [GO:0004672 molecular_function] (1); protein phosphorylation [GO:0006468 biological_process] (1)                     | Serine/threonine-protein kinase, active site [IPRO08271] (1); S-lectin receptor kinase, C-terminal [IPRO21820] (1); Serine-threonine/tyrosine-protein kinase, catalytic domain [IPRO1245] (1); Protein kinase domain [IPRO00719] (1); Protein kinase-like domain [IPRO11009] (1)                                                                                                                                                                                                                                                     | scaffold_7_mRNA_2217.1      | -                               |
| GF0031848 | 1                            | 0                       | 0                           | 0    | Hypothetical protein (1)                                          | protein phosphorylation [GO:0006468 biological_process] (1); protein kinase activity [GO:0004672 molecular_function] (1); ATP binding [GO:0005524 molecular_function] (1)                                                                                                   | PAN/Apple domain [IPRO06699] (1); Protein kinase, ATP binding site [IPRO17441] (1); Protein kinase-like domain [IPRO11009] (1); Protein kinase domain [IPRO00719] (1)                                                                                                                                                                                                                                                                                                                                                                | scaffold_7_mRNA_2214.1      | -                               |
| GF0031847 | 1                            | 0                       | 0                           | 0    | Hypothetical protein (1)                                          |                                                                                                                                                                                                                                                                             | scaffold_7_mRNA_2209.1                                                                                                                                                                                                                                                                                                                                                                                                                                                                                                               | -                           | -                               |
| GF0031846 | 1                            | 0                       | 0                           | 0    | Retrotransposon gag protein (1)                                   |                                                                                                                                                                                                                                                                             | scaffold_7_mRNA_2204.1                                                                                                                                                                                                                                                                                                                                                                                                                                                                                                               | -                           | -                               |
| GF0031845 | 1                            | 0                       | 0                           | 0    | Hypothetical protein (1)                                          |                                                                                                                                                                                                                                                                             | scaffold_7_mRNA_22.1                                                                                                                                                                                                                                                                                                                                                                                                                                                                                                                 | -                           | -                               |
| GF0031844 | 1                            | 0                       | 0                           | 0    | ERR receptor-like kinase family protein (1)                       | protein kinase activity [GO:0004672 molecular_function] (1); protein phosphorylation [GO:0006468 biological_process] (1); ATP binding [GO:0005524 molecular_function] (1); protein binding [GO:0005515 molecular_function] (1)                                              | Mitochondrial substrate/solute carrier [IPRO18108] (1); Mitochondrial carrier domain [IPRO23395] (1); Serine/threonine-protein kinase, active site [IPRO08271] (1); Protein kinase, ATP binding site [IPRO17441] (1); Leucine-rich repeat-containing N-terminal, plant-type [IPRO13210] (1); Leucine-rich repeat [IPRO01611] (1); Protein kinase domain [IPRO00719] (1); Protein kinase-like domain [IPRO11009] (1); Leucine-rich repeat domain, L domain-like [IPRO32675] (1); Leucine-rich repeat, typical subtype [IPRO03591] (1) | scaffold_7_mRNA_2199.1      | -                               |
| GF0031843 | 1                            | 0                       | 0                           | 0    | Hypothetical protein (1)                                          |                                                                                                                                                                                                                                                                             | scaffold_7_mRNA_2197.1                                                                                                                                                                                                                                                                                                                                                                                                                                                                                                               | -                           | -                               |
| GF0031842 | 1                            | 0                       | 0                           | 0    | Hypothetical protein (1)                                          |                                                                                                                                                                                                                                                                             | scaffold_7_mRNA_2196.1                                                                                                                                                                                                                                                                                                                                                                                                                                                                                                               | -                           | -                               |
| GF0031841 | 1                            | 0                       | 0                           | 0    | Cytosolic ribosome 5'-monophosphate phosphoribosyltransferase (1) |                                                                                                                                                                                                                                                                             | scaffold_7_mRNA_2180.1                                                                                                                                                                                                                                                                                                                                                                                                                                                                                                               | -                           | -                               |
| GF0031840 | 1                            | 0                       | 0                           | 0    | Hypothetical protein (1)                                          |                                                                                                                                                                                                                                                                             | scaffold_7_mRNA_2179.1                                                                                                                                                                                                                                                                                                                                                                                                                                                                                                               | -                           | -                               |
| GF0031839 | 1                            | 0                       | 0                           | 0    | Hypothetical protein (1)                                          |                                                                                                                                                                                                                                                                             | scaffold_7_mRNA_2178.1                                                                                                                                                                                                                                                                                                                                                                                                                                                                                                               | -                           | -                               |
| GF0031838 | 1                            | 0                       | 0                           | 0    | Hypothetical protein (1)                                          |                                                                                                                                                                                                                                                                             | scaffold_7_mRNA_2176.1                                                                                                                                                                                                                                                                                                                                                                                                                                                                                                               | -                           | -                               |

| ID        | Num. in <i>C. clementinae</i> | Num. in <i>C. uchiha</i> | Num. in <i>P. trifoliata</i> | Note                                                           | GO                                                                                                                                                                                                                                                                                                                   | InterPro                                                                                                                                                                                                                                                                                                      | Members in <i>C. clementinae</i> | Members in <i>C. uchiha</i> | Members in <i>P. trifoliata</i> |
|-----------|-------------------------------|--------------------------|------------------------------|----------------------------------------------------------------|----------------------------------------------------------------------------------------------------------------------------------------------------------------------------------------------------------------------------------------------------------------------------------------------------------------------|---------------------------------------------------------------------------------------------------------------------------------------------------------------------------------------------------------------------------------------------------------------------------------------------------------------|----------------------------------|-----------------------------|---------------------------------|
| GF0031837 | 1                             | 0                        | 0                            | 0 Hypothetical protein (1)                                     | nucleic acid binding [GO:0003676 molecular_function] (1); protein dimerization activity [GO:0046983 molecular_function] (1)                                                                                                                                                                                          | Ribonuclease H-like domain [IPRO12337] (1); HAT, C-terminal dimerisation domain [IPRO88906] (1)                                                                                                                                                                                                               | scaffold_7_mRNA_2171.1           | -                           | -                               |
| GF0031836 | 1                             | 0                        | 0                            | 0 Hypothetical protein (1)                                     | cellular_component [GO:0005622 cellular_component] (1); translation [GO:0006412 biological_process] (1); structural constituent of ribosome [GO:0005375 molecular_function] (1); ribosome [GO:0005840 molecular_function] (1)                                                                                        | Ribosomal protein L37ae [IPRO02674] (1); Ribosomal protein L37aeL37e [IPRO11331] (1); Zinc-binding ribosomal protein [IPRO11332] (1)                                                                                                                                                                          | scaffold_7_mRNA_2167.1           | -                           | -                               |
| GF0031835 | 1                             | 0                        | 0                            | 0 Hypothetical protein (1)                                     | protein binding [GO:0005515 molecular_function] (1)                                                                                                                                                                                                                                                                  | Ankyrin repeat [IPRO02110] (1); Ankyrin repeat-containing domain [IPRO20683] (1)                                                                                                                                                                                                                              | scaffold_7_mRNA_2166.1           | -                           | -                               |
| GF0031834 | 1                             | 0                        | 0                            | 0 Hypothetical protein (1)                                     | cellular response to salicylic acid stimulus [GO:0071446 biological_process] (1); integral component of membrane [GO:0016021 cellular_component] (1); regulation of salicylic acid mediated signaling pathway [GO:2000031 biological_process] (1); regulation of defense response [GO:001347 biological_process] (1) | PGG domain [IPRO26961] (1); Protein accelerated cell death 6 [IPRO32846] (1)                                                                                                                                                                                                                                  | scaffold_7_mRNA_2163.1           | -                           | -                               |
| GF0031833 | 1                             | 0                        | 0                            | 0 Putative ribonuclease H protein (1)                          | RNA-DNA hybrid ribonuclease activity [GO:0004523 molecular_function] (1); nucleic acid binding [GO:0003676 molecular_function] (1)                                                                                                                                                                                   | Ribonuclease H domain [IPRO02156] (1); Ribonuclease H-like domain [IPRO12337] (1)                                                                                                                                                                                                                             | scaffold_7_mRNA_2162.1           | -                           | -                               |
| GF0031832 | 1                             | 0                        | 0                            | 0 Hypothetical protein (1)                                     |                                                                                                                                                                                                                                                                                                                      |                                                                                                                                                                                                                                                                                                               | scaffold_7_mRNA_2161.1           | -                           | -                               |
| GF0031831 | 1                             | 0                        | 0                            | 0 Hypothetical protein (1)                                     |                                                                                                                                                                                                                                                                                                                      |                                                                                                                                                                                                                                                                                                               | scaffold_7_mRNA_2145.1           | -                           | -                               |
| GF0031830 | 1                             | 0                        | 0                            | 0 Hypothetical protein (1)                                     |                                                                                                                                                                                                                                                                                                                      |                                                                                                                                                                                                                                                                                                               | scaffold_7_mRNA_2134.1           | -                           | -                               |
| GF0031829 | 1                             | 0                        | 0                            | 0 Hypothetical protein (1)                                     |                                                                                                                                                                                                                                                                                                                      |                                                                                                                                                                                                                                                                                                               | scaffold_7_mRNA_2122.1           | -                           | -                               |
| GF0031828 | 1                             | 0                        | 0                            | 0 B-box type zinc finger family protein (1)                    | zinc ion binding [GO:0008270 molecular_function] (1); intracellular cellular_component [GO:0005622 cellular_component] (1)                                                                                                                                                                                           | B-box-type zinc finger [IPRO00315] (1)                                                                                                                                                                                                                                                                        | scaffold_7_mRNA_2122.2           | -                           | -                               |
| GF0031827 | 1                             | 0                        | 0                            | 0 Hypothetical protein (1)                                     |                                                                                                                                                                                                                                                                                                                      |                                                                                                                                                                                                                                                                                                               | scaffold_7_mRNA_2113.1           | -                           | -                               |
| GF0031826 | 1                             | 0                        | 0                            | 0 Hypothetical protein (1)                                     | proteolysis [GO:0006508 biological_process] (1); cysteine-type peptidase activity [GO:0008234 molecular_function] (1)                                                                                                                                                                                                | Ulp1 protease family, C-terminal catalytic domain [IPRO03653] (1); Domain of unknown function DUF1985 [IPRO15410] (1)                                                                                                                                                                                         | scaffold_7_mRNA_2106.1           | -                           | -                               |
| GF0031825 | 1                             | 0                        | 0                            | 0 Mutator-like transposase (1)                                 | zinc ion binding [GO:0008270 molecular_function] (1)                                                                                                                                                                                                                                                                 | Zinc finger, SWIM-type [IPRO07527] (1); Zinc finger, PMZ-type [IPRO06564] (1); MULE transposase domain [IPRO18290] (1); Transposase, MuDR, plant [IPRO04332] (1)                                                                                                                                              | scaffold_7_mRNA_2105.1           | -                           | -                               |
| GF0031824 | 1                             | 0                        | 0                            | 0 Hypothetical protein (1)                                     | spliceosomal complex [GO:0005681 cellular_component] (1); mRNA splicing via spliceosome [GO:0006398 biological_process] (1)                                                                                                                                                                                          | LSM domain [IPRO10920] (1); Small nuclear ribonucleoprotein E [IPRO27078] (1); LSM domain, eukaryotic/archaeal-type [IPRO01163] (1)                                                                                                                                                                           | scaffold_7_mRNA_2100.1           | -                           | -                               |
| GF0031823 | 1                             | 0                        | 0                            | 0 Flavonoid 3'-monooxygenase (1)                               | oxidoreductase activity, acting on paired donors, with incorporation or reduction of molecular oxygen [GO:0016705 molecular_function] (1); oxidation-reduction process [GO:0055114 biological_process] (1); iron ion binding [GO:0005506 molecular_function] (1); heme binding [GO:0020037 molecular_function] (1)   | Cytochrome P450 [IPRO01128] (1); Cytochrome P450, conserved site [IPRO17972] (1); Cytochrome P450, E-class, group I [IPRO02401] (1)                                                                                                                                                                           | scaffold_7_mRNA_2098.1           | -                           | -                               |
| GF0031822 | 1                             | 0                        | 0                            | 0 Hypothetical protein (1)                                     |                                                                                                                                                                                                                                                                                                                      |                                                                                                                                                                                                                                                                                                               | scaffold_7_mRNA_2090.1           | -                           | -                               |
| GF0031821 | 1                             | 0                        | 0                            | 0 Hypothetical protein (1)                                     |                                                                                                                                                                                                                                                                                                                      |                                                                                                                                                                                                                                                                                                               | scaffold_7_mRNA_2086.1           | -                           | -                               |
| GF0031820 | 1                             | 0                        | 0                            | 0 Disease resistance RPS5-like protein (1)                     | protein binding [GO:0005515 molecular_function] (1)                                                                                                                                                                                                                                                                  | Leucine-rich repeat, typical subtype [IPRO03591] (1); Leucine-rich repeat domain, L domain-like [IPRO32675] (1); Leucine-rich repeat [IPRO01611] (1)                                                                                                                                                          | scaffold_7_mRNA_2083.1           | -                           | -                               |
| GF0031819 | 1                             | 0                        | 0                            | 0 Disease resistance protein RPS2 (1)                          | ADP binding [GO:0043531 molecular_function] (1); protein binding [GO:0005515 molecular_function] (1)                                                                                                                                                                                                                 | Winged helix-turn-helix DNA-binding domain [IPRO11991] (1); Leucine-rich repeat domain, L domain-like [IPRO32675] (1); Leucine-rich repeat, typical subtype [IPRO03591] (1); P-loop containing nucleoside triphosphate hydrolase [IPRO27417] (1); Leucine-rich repeat [IPRO01611] (1); NB-ARC [IPRO02152] (1) | scaffold_7_mRNA_2082.1           | -                           | -                               |
| GF0031818 | 1                             | 0                        | 0                            | 0 C6HC-type zinc finger RING-U-box protein (1)                 | protein ubiquitination [GO:0016567 biological_process] (1); ubiquitin-protein transferase activity [GO:0004842 molecular_function] (1); protein binding [GO:0005515 molecular_function] (1); zinc ion binding [GO:0008270 molecular_function] (1)                                                                    | Zinc finger, RING-type [IPRO01841] (1); E3 ubiquitin ligase RBR family [IPRO31127] (1); Zinc finger, RING-type, conserved site [IPRO17907] (1); Zinc finger, RING-FYVE/PHD-type [IPRO13083] (1); IBR domain [IPRO02867] (1)                                                                                   | scaffold_7_mRNA_2078.1           | -                           | -                               |
| GF0031817 | 1                             | 0                        | 0                            | 0 Hypothetical protein (1)                                     |                                                                                                                                                                                                                                                                                                                      |                                                                                                                                                                                                                                                                                                               | scaffold_7_mRNA_2073.1           | -                           | -                               |
| GF0031816 | 1                             | 0                        | 0                            | 0 Hypothetical protein (1)                                     |                                                                                                                                                                                                                                                                                                                      |                                                                                                                                                                                                                                                                                                               | scaffold_7_mRNA_2072.1           | -                           | -                               |
| GF0031815 | 1                             | 0                        | 0                            | 0 Hypothetical protein (1)                                     |                                                                                                                                                                                                                                                                                                                      |                                                                                                                                                                                                                                                                                                               | scaffold_7_mRNA_2071.1           | -                           | -                               |
| GF0031814 | 1                             | 0                        | 0                            | 0 Hypothetical protein (1)                                     |                                                                                                                                                                                                                                                                                                                      |                                                                                                                                                                                                                                                                                                               | scaffold_7_mRNA_207.1            | -                           | -                               |
| GF0031813 | 1                             | 0                        | 0                            | 0 Hypothetical protein (1)                                     |                                                                                                                                                                                                                                                                                                                      |                                                                                                                                                                                                                                                                                                               | scaffold_7_mRNA_2067.1           | -                           | -                               |
| GF0031812 | 1                             | 0                        | 0                            | 0 Hypothetical protein (1)                                     |                                                                                                                                                                                                                                                                                                                      |                                                                                                                                                                                                                                                                                                               | scaffold_7_mRNA_2047.1           | -                           | -                               |
| GF0031811 | 1                             | 0                        | 0                            | 0 Hypothetical protein (1)                                     |                                                                                                                                                                                                                                                                                                                      |                                                                                                                                                                                                                                                                                                               | scaffold_7_mRNA_2044.1           | -                           | -                               |
| GF0031810 | 1                             | 0                        | 0                            | 0 Histone H3 (1)                                               | protein heterodimerization activity [GO:0046982 molecular_function] (1); DNA binding [GO:0003677 molecular_function] (1); nucleosome [GO:0000786 cellular_component] (1)                                                                                                                                             | Histone H2A/H2B/H3 [IPRO07125] (1); Histone H3/CENP-A [IPRO00164] (1); Histone-fold [IPRO09072] (1)                                                                                                                                                                                                           | scaffold_7_mRNA_204.1            | -                           | -                               |
| GF0031809 | 1                             | 0                        | 0                            | 0 Hypothetical protein (1)                                     |                                                                                                                                                                                                                                                                                                                      |                                                                                                                                                                                                                                                                                                               | scaffold_7_mRNA_2037.1           | -                           | -                               |
| GF0031808 | 1                             | 0                        | 0                            | 0 Hypothetical protein (1)                                     |                                                                                                                                                                                                                                                                                                                      |                                                                                                                                                                                                                                                                                                               | scaffold_7_mRNA_2036.1           | -                           | -                               |
| GF0031807 | 1                             | 0                        | 0                            | 0 Retrotransposon protein, putative, Ty1-copia subclass (1)    |                                                                                                                                                                                                                                                                                                                      |                                                                                                                                                                                                                                                                                                               | scaffold_7_mRNA_2030.1           | -                           | -                               |
| GF0031806 | 1                             | 0                        | 0                            | 0 Histone H1 (1)                                               | nucleosome [GO:0000786 cellular_component] (1); nucleosome assembly [GO:0006334 biological_process] (1); nucleus [GO:0005634 cellular_component] (1); DNA binding [GO:0003677 molecular_function] (1)                                                                                                                | Linker histone H1/H5, domain H15 [IPRO05818] (1); Winged helix-turn-helix DNA-binding domain [IPRO11991] (1); Histone H5 [IPRO05819] (1)                                                                                                                                                                      | scaffold_7_mRNA_203.1            | -                           | -                               |
| GF0031805 | 1                             | 0                        | 0                            | 0 Hypothetical protein (1)                                     |                                                                                                                                                                                                                                                                                                                      |                                                                                                                                                                                                                                                                                                               | scaffold_7_mRNA_2025.1           | -                           | -                               |
| GF0031804 | 1                             | 0                        | 0                            | 0 Hypothetical protein (1)                                     |                                                                                                                                                                                                                                                                                                                      |                                                                                                                                                                                                                                                                                                               | scaffold_7_mRNA_2014.1           | -                           | -                               |
| GF0031803 | 1                             | 0                        | 0                            | 0 Cytokinin riboside 5'-monophosphate phosphoribohydrolase (1) |                                                                                                                                                                                                                                                                                                                      | LOG family [IPRO31100] (1)                                                                                                                                                                                                                                                                                    | scaffold_7_mRNA_2009.1           | -                           | -                               |
| GF0031802 | 1                             | 0                        | 0                            | 0 Hypothetical protein (1)                                     |                                                                                                                                                                                                                                                                                                                      |                                                                                                                                                                                                                                                                                                               | scaffold_7_mRNA_2007.1           | -                           | -                               |
| GF0031801 | 1                             | 0                        | 0                            | 0 Cytokinin riboside 5'-monophosphate phosphoribohydrolase (1) |                                                                                                                                                                                                                                                                                                                      | Cytokinin riboside 5'-monophosphate phosphoribohydrolase LOG [IPRO05269] (1); LOG family [IPRO31100] (1)                                                                                                                                                                                                      | scaffold_7_mRNA_2006.1           | -                           | -                               |
| GF0031800 | 1                             | 0                        | 0                            | 0 Hypothetical protein (1)                                     |                                                                                                                                                                                                                                                                                                                      |                                                                                                                                                                                                                                                                                                               | scaffold_7_mRNA_2001.1           | -                           | -                               |
| GF0031799 | 1                             | 0                        | 0                            | 0 Hypothetical protein (1)                                     |                                                                                                                                                                                                                                                                                                                      |                                                                                                                                                                                                                                                                                                               | scaffold_7_mRNA_1997.1           | -                           | -                               |
| GF0031798 | 1                             | 0                        | 0                            | 0 Monosaccharide transport protein (1)                         |                                                                                                                                                                                                                                                                                                                      |                                                                                                                                                                                                                                                                                                               | scaffold_7_mRNA_1996.1           | -                           | -                               |
| GF0031797 | 1                             | 0                        | 0                            | 0 Hypothetical protein (1)                                     |                                                                                                                                                                                                                                                                                                                      |                                                                                                                                                                                                                                                                                                               | scaffold_7_mRNA_199.1            | -                           | -                               |
| GF0031796 | 1                             | 0                        | 0                            | 0 Hypothetical protein (1)                                     |                                                                                                                                                                                                                                                                                                                      |                                                                                                                                                                                                                                                                                                               | scaffold_7_mRNA_1988.1           | -                           | -                               |
| GF0031795 | 1                             | 0                        | 0                            | 0 Hypothetical protein (1)                                     |                                                                                                                                                                                                                                                                                                                      |                                                                                                                                                                                                                                                                                                               | scaffold_7_mRNA_1982.1           | -                           | -                               |
| GF0031794 | 1                             | 0                        | 0                            | 0 Hypothetical protein (1)                                     |                                                                                                                                                                                                                                                                                                                      |                                                                                                                                                                                                                                                                                                               | scaffold_7_mRNA_1978.1           | -                           | -                               |
| GF0031793 | 1                             | 0                        | 0                            | 0 Hypothetical protein (1)                                     |                                                                                                                                                                                                                                                                                                                      |                                                                                                                                                                                                                                                                                                               | scaffold_7_mRNA_1977.1           | -                           | -                               |
| GF0031792 | 1                             | 0                        | 0                            | 0 Putative ribonuclease H protein (1)                          | RNA-DNA hybrid ribonuclease activity [GO:0004523 molecular_function] (1); nucleic acid binding [GO:0003676 molecular_function] (1)                                                                                                                                                                                   | TB2/DPI1/HVA22-related protein [IPRO04345] (1); Ribonuclease H-like domain [IPRO12337] (1); Ribonuclease H domain [IPRO02156] (1)                                                                                                                                                                             | scaffold_7_mRNA_1975.1           | -                           | -                               |
| GF0031791 | 1                             | 0                        | 0                            | 0 Hypothetical protein (1)                                     | nucleic acid binding [GO:0003676 molecular_function] (1); RNA-DNA hybrid ribonuclease activity [GO:0004523 molecular_function] (1)                                                                                                                                                                                   | Ribonuclease H domain [IPRO02156] (1); Ribonuclease H-like domain [IPRO12337] (1)                                                                                                                                                                                                                             | scaffold_7_mRNA_1973.1           | -                           | -                               |
| GF0031790 | 1                             | 0                        | 0                            | 0 Disease resistance related protein (1)                       | ADP binding [GO:0043531 molecular_function] (1)                                                                                                                                                                                                                                                                      | NB-ARC [IPRO02182] (1); P-loop containing nucleoside triphosphate hydrolase [IPRO27417] (1)                                                                                                                                                                                                                   | scaffold_7_mRNA_1970.1           | -                           | -                               |
| GF0031789 | 1                             | 0                        | 0                            | 0 Defective in collin neddylation protein (1)                  |                                                                                                                                                                                                                                                                                                                      | Defective-in-cullin neddylation protein [IPRO14764] (1); Potentiating neddylation domain [IPRO05176] (1); EF-hand domain pair [IPRO11992] (1)                                                                                                                                                                 | scaffold_7_mRNA_1953.2           | -                           | -                               |
| GF0031788 | 1                             | 0                        | 0                            | 0 Hypothetical protein (1)                                     |                                                                                                                                                                                                                                                                                                                      |                                                                                                                                                                                                                                                                                                               | scaffold_7_mRNA_1950.1           | -                           | -                               |
| GF0031787 | 1                             | 0                        | 0                            | 0 Hypothetical protein (1)                                     |                                                                                                                                                                                                                                                                                                                      |                                                                                                                                                                                                                                                                                                               | scaffold_7_mRNA_1949.1           | -                           | -                               |
| GF0031786 | 1                             | 0                        | 0                            | 0 Monosaccharide transport protein (1)                         |                                                                                                                                                                                                                                                                                                                      |                                                                                                                                                                                                                                                                                                               | scaffold_7_mRNA_1947.1           | -                           | -                               |
| GF0031785 | 1                             | 0                        | 0                            | 0 Hypothetical protein (1)                                     |                                                                                                                                                                                                                                                                                                                      | Protein kinase-like domain [IPRO11009] (1)                                                                                                                                                                                                                                                                    | scaffold_7_mRNA_1934.1           | -                           | -                               |
| GF0031784 | 1                             | 0                        | 0                            | 0 Hypothetical protein (1)                                     | protein binding [GO:0005515 molecular_function] (1)                                                                                                                                                                                                                                                                  | WD40-repeat-containing domain [IPRO17966] (1)                                                                                                                                                                                                                                                                 | scaffold_7_mRNA_1931.1           | -                           | -                               |

| ID        | Num. in <i>C. clementinae</i> | Num. in <i>C. uchiha</i> | Num. in <i>P. trifoliata</i> | Note                                                         | GO                                                                                                                                                                                                                                                                                                           | InterPro                                                                                                                                                                                                                                                                                                                                                                                                                              | Members in <i>C. clementinae</i> | Members in <i>C. uchiha</i> | Members in <i>P. trifoliata</i> |   |
|-----------|-------------------------------|--------------------------|------------------------------|--------------------------------------------------------------|--------------------------------------------------------------------------------------------------------------------------------------------------------------------------------------------------------------------------------------------------------------------------------------------------------------|---------------------------------------------------------------------------------------------------------------------------------------------------------------------------------------------------------------------------------------------------------------------------------------------------------------------------------------------------------------------------------------------------------------------------------------|----------------------------------|-----------------------------|---------------------------------|---|
| GF0031783 | 1                             | 0                        | 0                            | Cysteine-rich RLK (Receptor-like kinase protein) (1)         | protein phosphorylation [GO:0006468 biological_process] (1); protein kinase activity [GO:000472 molecular_function] (1); serine/threonine kinase activity [GO:0004674 molecular_function] (1); ATP binding [GO:0005524 molecular_function] (1)                                                               | Serine-threonine/tyrosine-protein kinase, catalytic domain [IPRO1245] (1); S-locus receptor kinase, C-terminal [IPRO21820] (1); Protein kinase-like domain [IPRO11009] (1); Protein kinase domain [IPRO00719] (1)                                                                                                                                                                                                                     | scaffold_7_mRNA_1930.1           | -                           | -                               |   |
| GF0031782 | 1                             | 0                        | 0                            | Monosaccharide transport protein (1)                         |                                                                                                                                                                                                                                                                                                              |                                                                                                                                                                                                                                                                                                                                                                                                                                       |                                  | scaffold_7_mRNA_1927.1      | -                               | - |
| GF0031781 | 1                             | 0                        | 0                            | Hypothetical protein (1)                                     |                                                                                                                                                                                                                                                                                                              |                                                                                                                                                                                                                                                                                                                                                                                                                                       |                                  | scaffold_7_mRNA_1926.1      | -                               | - |
| GF0031780 | 1                             | 0                        | 0                            | Hypothetical protein (1)                                     |                                                                                                                                                                                                                                                                                                              | Retrotransposon gag domain [IPRO05162] (1)                                                                                                                                                                                                                                                                                                                                                                                            |                                  | scaffold_7_mRNA_1925.1      | -                               | - |
| GF0031779 | 1                             | 0                        | 0                            | Hypothetical protein (1)                                     |                                                                                                                                                                                                                                                                                                              |                                                                                                                                                                                                                                                                                                                                                                                                                                       |                                  | scaffold_7_mRNA_1922.1      | -                               | - |
| GF0031778 | 1                             | 0                        | 0                            | Hypothetical protein (1)                                     | protein binding [GO:0005515 molecular_function] (1)                                                                                                                                                                                                                                                          | Leucine-rich repeat [IPRO01611] (1); Leucine-rich repeat domain, L domain-like [IPRO32675] (1)                                                                                                                                                                                                                                                                                                                                        |                                  | scaffold_7_mRNA_1918.1      | -                               | - |
| GF0031777 | 1                             | 0                        | 0                            | Verticillium wilt resistance-like protein (1)                | protein kinase activity [GO:0004672 molecular_function] (1); protein serine/threonine kinase activity [GO:0004674 molecular_function] (1); protein phosphorylation [GO:0006468 biological_process] (1); ATP binding [GO:0005524 molecular_function] (1); protein binding [GO:0005515 molecular_function] (1) | Leucine-rich repeat, typical subtype [IPRO03591] (1); Protein kinase-like domain [IPRO11009] (1); Leucine-rich repeat domain, L domain-like [IPRO32675] (1); Protein kinase domain [IPRO00719] (1); Leucine-rich repeat [IPRO01611] (1); Serine/threonine-protein kinase, active site [IPRO08271] (1); S-locus receptor kinase, C-terminal [IPRO21820] (1); Serine-threonine/tyrosine-protein kinase, catalytic domain [IPRO1245] (1) |                                  | scaffold_7_mRNA_1916.1      | -                               | - |
| GF0031776 | 1                             | 0                        | 0                            | Verticillium wilt resistance-like protein (1)                | protein binding [GO:0005515 molecular_function] (1)                                                                                                                                                                                                                                                          | Leucine-rich repeat, typical subtype [IPRO03591] (1); Leucine-rich repeat domain, L domain-like [IPRO32675] (1); Leucine-rich repeat-containing N-terminal, plant-type [IPRO13210] (1); Leucine-rich repeat [IPRO01611] (1)                                                                                                                                                                                                           |                                  | scaffold_7_mRNA_1915.1      | -                               | - |
| GF0031775 | 1                             | 0                        | 0                            | Hypothetical protein (1)                                     |                                                                                                                                                                                                                                                                                                              |                                                                                                                                                                                                                                                                                                                                                                                                                                       |                                  | scaffold_7_mRNA_1912.1      | -                               | - |
| GF0031774 | 1                             | 0                        | 0                            | Hypothetical protein (1)                                     |                                                                                                                                                                                                                                                                                                              |                                                                                                                                                                                                                                                                                                                                                                                                                                       |                                  | scaffold_7_mRNA_1909.1      | -                               | - |
| GF0031773 | 1                             | 0                        | 0                            | Hypothetical protein (1)                                     | zinc ion binding [GO:0008270 molecular_function] (1); nucleic acid binding [GO:0003676 molecular_function] (1)                                                                                                                                                                                               | Zinc knuckle CX2CX4HX4C [IPRO25836] (1); Zinc finger, CCHC-type [IPRO01878] (1)                                                                                                                                                                                                                                                                                                                                                       |                                  | scaffold_7_mRNA_1906.1      | -                               | - |
| GF0031772 | 1                             | 0                        | 0                            | Hypothetical protein (1)                                     |                                                                                                                                                                                                                                                                                                              | Endonuclease/exonuclease/phosphatase [IPRO05153] (1)                                                                                                                                                                                                                                                                                                                                                                                  |                                  | scaffold_7_mRNA_1905.1      | -                               | - |
| GF0031771 | 1                             | 0                        | 0                            | Hypothetical protein (1)                                     |                                                                                                                                                                                                                                                                                                              | Reverse transcriptase zinc-binding domain [IPRO26960] (1)                                                                                                                                                                                                                                                                                                                                                                             |                                  | scaffold_7_mRNA_1903.1      | -                               | - |
| GF0031770 | 1                             | 0                        | 0                            | Hypothetical protein (1)                                     | zinc ion binding [GO:0008270 molecular_function] (1)                                                                                                                                                                                                                                                         | Zinc finger, SWIM-type [IPRO07527] (1); Zinc finger, PMZ-type [IPRO06564] (1)                                                                                                                                                                                                                                                                                                                                                         |                                  | scaffold_7_mRNA_1899.1      | -                               | - |
| GF0031769 | 1                             | 0                        | 0                            | Hypothetical protein (1)                                     |                                                                                                                                                                                                                                                                                                              | Reverse transcriptase, RNA-dependent DNA polymerase [IPRO3103] (1)                                                                                                                                                                                                                                                                                                                                                                    |                                  | scaffold_7_mRNA_1895.1      | -                               | - |
| GF0031768 | 1                             | 0                        | 0                            | Cytokinin riboside 5'-monophosphate phosphoribohydrolase (1) |                                                                                                                                                                                                                                                                                                              | LOG family [IPRO31100] (1); Cytokinin riboside 5'-monophosphate phosphoribohydrolase LOG [IPRO05269] (1)                                                                                                                                                                                                                                                                                                                              |                                  | scaffold_7_mRNA_1892.1      | -                               | - |
| GF0031767 | 1                             | 0                        | 0                            | Hypothetical protein (1)                                     |                                                                                                                                                                                                                                                                                                              |                                                                                                                                                                                                                                                                                                                                                                                                                                       |                                  | scaffold_7_mRNA_1890.1      | -                               | - |
| GF0031766 | 1                             | 0                        | 0                            | Hypothetical protein (1)                                     |                                                                                                                                                                                                                                                                                                              |                                                                                                                                                                                                                                                                                                                                                                                                                                       |                                  | scaffold_7_mRNA_1889.1      | -                               | - |
| GF0031765 | 1                             | 0                        | 0                            | Hypothetical protein (1)                                     | protein dimerization activity [GO:0046983 molecular_function] (1)                                                                                                                                                                                                                                            | HAT, C-terminal dimerisation domain [IPRO08906] (1)                                                                                                                                                                                                                                                                                                                                                                                   |                                  | scaffold_7_mRNA_1879.1      | -                               | - |
| GF0031764 | 1                             | 0                        | 0                            | LRR receptor-like serine/threonine-protein kinase GSO1 (1)   | protein binding [GO:0005515 molecular_function] (1)                                                                                                                                                                                                                                                          | Leucine-rich repeat domain, L domain-like [IPRO32675] (1); Leucine-rich repeat, typical subtype [IPRO03591] (1); Leucine-rich repeat [IPRO01611] (1)                                                                                                                                                                                                                                                                                  |                                  | scaffold_7_mRNA_1878.1      | -                               | - |
| GF0031763 | 1                             | 0                        | 0                            | Hypothetical protein (1)                                     |                                                                                                                                                                                                                                                                                                              |                                                                                                                                                                                                                                                                                                                                                                                                                                       |                                  | scaffold_7_mRNA_1876.1      | -                               | - |
| GF0031762 | 1                             | 0                        | 0                            | Cytokinin riboside 5'-monophosphate phosphoribohydrolase (1) |                                                                                                                                                                                                                                                                                                              | LOG family [IPRO31100] (1); Cytokinin riboside 5'-monophosphate phosphoribohydrolase LOG [IPRO05269] (1)                                                                                                                                                                                                                                                                                                                              |                                  | scaffold_7_mRNA_1875.1      | -                               | - |
| GF0031761 | 1                             | 0                        | 0                            | Hypothetical protein (1)                                     |                                                                                                                                                                                                                                                                                                              | MULE transposase domain [IPRO18289] (1)                                                                                                                                                                                                                                                                                                                                                                                               |                                  | scaffold_7_mRNA_1871.1      | -                               | - |
| GF0031760 | 1                             | 0                        | 0                            | Hypothetical protein (1)                                     | cysteine-type peptidase activity [GO:0008234 molecular_function] (1); proteolysis [GO:0006508 biological_process] (1)                                                                                                                                                                                        | Upt1 protease family, C-terminal catalytic domain [IPRO03653] (1); Domain of unknown function DUF1985 [IPRO15410] (1)                                                                                                                                                                                                                                                                                                                 |                                  | scaffold_7_mRNA_1870.1      | -                               | - |
| GF0031759 | 1                             | 0                        | 0                            | Mutator-like transposase (1)                                 | zinc ion binding [GO:0008270 molecular_function] (1)                                                                                                                                                                                                                                                         | MULE transposase domain [IPRO18289] (1); Zinc finger, PMZ-type [IPRO06564] (1); Zinc finger, SWIM-type [IPRO07527] (1)                                                                                                                                                                                                                                                                                                                |                                  | scaffold_7_mRNA_1869.1      | -                               | - |
| GF0031758 | 1                             | 0                        | 0                            | Non-LTR reverse transcriptase (1)                            |                                                                                                                                                                                                                                                                                                              | Endonuclease/exonuclease/phosphatase [IPRO05153] (1); Protein of unknown function DUF247, plant [IPRO04158] (1)                                                                                                                                                                                                                                                                                                                       |                                  | scaffold_7_mRNA_1857.1      | -                               | - |
| GF0031757 | 1                             | 0                        | 0                            | Hypothetical protein (1)                                     |                                                                                                                                                                                                                                                                                                              |                                                                                                                                                                                                                                                                                                                                                                                                                                       |                                  | scaffold_7_mRNA_1834.1      | -                               | - |
| GF0031756 | 1                             | 0                        | 0                            | Hypothetical protein (1)                                     |                                                                                                                                                                                                                                                                                                              |                                                                                                                                                                                                                                                                                                                                                                                                                                       |                                  | scaffold_7_mRNA_1832.1      | -                               | - |
| GF0031755 | 1                             | 0                        | 0                            | Hypothetical protein (1)                                     |                                                                                                                                                                                                                                                                                                              | Leucine-rich repeat domain, L domain-like [IPRO32675] (1)                                                                                                                                                                                                                                                                                                                                                                             |                                  | scaffold_7_mRNA_1831.1      | -                               | - |
| GF0031754 | 1                             | 0                        | 0                            | Hypothetical protein (1)                                     |                                                                                                                                                                                                                                                                                                              | Leucine-rich repeat [IPRO01611] (1); Leucine-rich repeat domain, L domain-like [IPRO32675] (1)                                                                                                                                                                                                                                                                                                                                        |                                  | scaffold_7_mRNA_1829.1      | -                               | - |
| GF0031753 | 1                             | 0                        | 0                            | Disease resistance RPS5-like protein (1)                     | protein binding [GO:0005515 molecular_function] (1)                                                                                                                                                                                                                                                          | Leucine-rich repeat [IPRO01611] (1); Leucine-rich repeat domain, L domain-like [IPRO32675] (1)                                                                                                                                                                                                                                                                                                                                        |                                  | scaffold_7_mRNA_1822.1      | -                               | - |
| GF0031752 | 1                             | 0                        | 0                            | Hypothetical protein (1)                                     |                                                                                                                                                                                                                                                                                                              | Leucine-rich repeat-containing N-terminal, plant-type [IPRO13210] (1); Leucine rich repeat 4 [IPRO25875] (1); Leucine-rich repeat domain, L domain-like [IPRO32675] (1)                                                                                                                                                                                                                                                               |                                  | scaffold_7_mRNA_1821.1      | -                               | - |
| GF0031751 | 1                             | 0                        | 0                            | Phytosulfokine receptor 2-like protein (1)                   |                                                                                                                                                                                                                                                                                                              | Leucine-rich repeat-containing N-terminal, plant-type [IPRO13210] (1); Leucine rich repeat 4 [IPRO25875] (1); Leucine-rich repeat domain, L domain-like [IPRO32675] (1)                                                                                                                                                                                                                                                               |                                  | scaffold_7_mRNA_1813.1      | -                               | - |
| GF0031750 | 1                             | 0                        | 0                            | Hypothetical protein (1)                                     |                                                                                                                                                                                                                                                                                                              | Retrotransposon gag domain [IPRO05162] (1)                                                                                                                                                                                                                                                                                                                                                                                            |                                  | scaffold_7_mRNA_1809.1      | -                               | - |
| GF0031749 | 1                             | 0                        | 0                            | Hypothetical protein (1)                                     | protein binding [GO:0005515 molecular_function] (1)                                                                                                                                                                                                                                                          | Leucine-rich repeat-containing N-terminal, plant-type [IPRO13210] (1); Leucine-rich repeat [IPRO01611] (1); Leucine-rich repeat domain, L domain-like [IPRO32675] (1); Leucine rich repeat 4 [IPRO25875] (1)                                                                                                                                                                                                                          |                                  | scaffold_7_mRNA_1807.1      | -                               | - |
| GF0031748 | 1                             | 0                        | 0                            | Hypothetical protein (1)                                     | protein binding [GO:0005515 molecular_function] (1)                                                                                                                                                                                                                                                          | Leucine-rich repeat [IPRO01611] (1); Leucine-rich repeat domain, L domain-like [IPRO32675] (1)                                                                                                                                                                                                                                                                                                                                        |                                  | scaffold_7_mRNA_1805.1      | -                               | - |
| GF0031747 | 1                             | 0                        | 0                            | Hypothetical protein (1)                                     |                                                                                                                                                                                                                                                                                                              |                                                                                                                                                                                                                                                                                                                                                                                                                                       |                                  | scaffold_7_mRNA_1803.1      | -                               | - |
| GF0031746 | 1                             | 0                        | 0                            | Hypothetical protein (1)                                     |                                                                                                                                                                                                                                                                                                              |                                                                                                                                                                                                                                                                                                                                                                                                                                       |                                  | scaffold_7_mRNA_1801.1      | -                               | - |
| GF0031745 | 1                             | 0                        | 0                            | Hypothetical protein (1)                                     |                                                                                                                                                                                                                                                                                                              | Aspartic peptidase domain [IPRO21109] (1)                                                                                                                                                                                                                                                                                                                                                                                             |                                  | scaffold_7_mRNA_1800.1      | -                               | - |
| GF0031744 | 1                             | 0                        | 0                            | Hypothetical protein (1)                                     |                                                                                                                                                                                                                                                                                                              |                                                                                                                                                                                                                                                                                                                                                                                                                                       |                                  | scaffold_7_mRNA_1797.1      | -                               | - |
| GF0031743 | 1                             | 0                        | 0                            | Putative disease resistance protein (1)                      | protein binding [GO:0005515 molecular_function] (1)                                                                                                                                                                                                                                                          | Leucine-rich repeat-containing N-terminal, plant-type [IPRO13210] (1); Leucine-rich repeat [IPRO01611] (1); Leucine-rich repeat domain, L domain-like [IPRO32675] (1); Leucine-rich repeat, typical subtype [IPRO03591] (1)                                                                                                                                                                                                           |                                  | scaffold_7_mRNA_1787.1      | -                               | - |
| GF0031742 | 1                             | 0                        | 0                            | Hypothetical protein (1)                                     | carbohydrate metabolic process [GO:0005975 biological_process] (1); phosphotransferase activity, alcohol group as acceptor [GO:0016773 molecular_function] (1)                                                                                                                                               | Carbohydrate kinase, FGGY, N-terminal [IPRO18484] (1); Carbohydrate kinase, FGGY, C-terminal [IPRO18485] (1)                                                                                                                                                                                                                                                                                                                          |                                  | scaffold_7_mRNA_1786.1      | -                               | - |
| GF0031741 | 1                             | 0                        | 0                            | Hypothetical protein (1)                                     |                                                                                                                                                                                                                                                                                                              |                                                                                                                                                                                                                                                                                                                                                                                                                                       |                                  | scaffold_7_mRNA_1781.1      | -                               | - |
| GF0031740 | 1                             | 0                        | 0                            | Hypothetical protein (1)                                     | zinc ion binding [GO:0008270 molecular_function] (1); nucleic acid binding [GO:0003676 molecular_function] (1)                                                                                                                                                                                               | Domain of unknown function DUF4283 [IPRO25558] (1); Zinc finger, CCHC-type [IPRO01878] (1); Zinc knuckle CX2CX4HX4C [IPRO25836] (1)                                                                                                                                                                                                                                                                                                   |                                  | scaffold_7_mRNA_1779.1      | -                               | - |
| GF0031739 | 1                             | 0                        | 0                            | Hypothetical protein (1)                                     |                                                                                                                                                                                                                                                                                                              |                                                                                                                                                                                                                                                                                                                                                                                                                                       |                                  | scaffold_7_mRNA_1776.1      | -                               | - |
| GF0031738 | 1                             | 0                        | 0                            | Phytosulfokine receptor (1)                                  |                                                                                                                                                                                                                                                                                                              | Leucine-rich repeat-containing N-terminal, plant-type [IPRO13210] (1); Leucine-rich repeat domain, L domain-like [IPRO32675] (1)                                                                                                                                                                                                                                                                                                      |                                  | scaffold_7_mRNA_1773.1      | -                               | - |
| GF0031737 | 1                             | 0                        | 0                            | Hypothetical protein (1)                                     |                                                                                                                                                                                                                                                                                                              |                                                                                                                                                                                                                                                                                                                                                                                                                                       |                                  | scaffold_7_mRNA_1771.1      | -                               | - |
| GF0031736 | 1                             | 0                        | 0                            | Monosaccharide transport protein (1)                         |                                                                                                                                                                                                                                                                                                              |                                                                                                                                                                                                                                                                                                                                                                                                                                       |                                  | scaffold_7_mRNA_1769.1      | -                               | - |
| GF0031735 | 1                             | 0                        | 0                            | Hypothetical protein (1)                                     |                                                                                                                                                                                                                                                                                                              | Retrotransposon gag domain [IPRO05162] (1); Aspartic peptidase domain [IPRO21109] (1)                                                                                                                                                                                                                                                                                                                                                 |                                  | scaffold_7_mRNA_1768.1      | -                               | - |
| GF0031734 | 1                             | 0                        | 0                            | Hypothetical protein (1)                                     |                                                                                                                                                                                                                                                                                                              | Leucine-rich repeat-containing N-terminal, plant-type [IPRO13210] (1)                                                                                                                                                                                                                                                                                                                                                                 |                                  | scaffold_7_mRNA_1766.1      | -                               | - |
| GF0031733 | 1                             | 0                        | 0                            | Hypothetical protein (1)                                     |                                                                                                                                                                                                                                                                                                              | Winged helix-turn-helix DNA-binding domain [IPRO11991] (1)                                                                                                                                                                                                                                                                                                                                                                            |                                  | scaffold_7_mRNA_1764.1      | -                               | - |
| GF0031732 | 1                             | 0                        | 0                            | Hypothetical protein (1)                                     |                                                                                                                                                                                                                                                                                                              |                                                                                                                                                                                                                                                                                                                                                                                                                                       |                                  | scaffold_7_mRNA_1762.1      | -                               | - |
| GF0031731 | 1                             | 0                        | 0                            | Hypothetical protein (1)                                     |                                                                                                                                                                                                                                                                                                              | Retrotransposon gag domain [IPRO05162] (1)                                                                                                                                                                                                                                                                                                                                                                                            |                                  | scaffold_7_mRNA_1761.1      | -                               | - |
| GF0031730 | 1                             | 0                        | 0                            | Hypothetical protein (1)                                     | zinc ion binding [GO:0008270 molecular_function] (1); nucleic acid binding [GO:0003676 molecular_function] (1)                                                                                                                                                                                               | Domain of unknown function DUF4283 [IPRO25558] (1); Zinc knuckle CX2CX4HX4C [IPRO25836] (1); Zinc finger, CCHC-type [IPRO01878] (1)                                                                                                                                                                                                                                                                                                   |                                  | scaffold_7_mRNA_1750.1      | -                               | - |



| ID        | Num. in <i>C. caryophyllata</i> | Num. in <i>C. uchiha</i> | Num. in <i>P. trifoliata</i> | Note                                                         | GO                                                                                                                                                                                                      | InterPro                                                                                                                                                                                                                                                    | Members in <i>C. caryophyllata</i> | Members in <i>C. uchiha</i> | Members in <i>P. trifoliata</i> |
|-----------|---------------------------------|--------------------------|------------------------------|--------------------------------------------------------------|---------------------------------------------------------------------------------------------------------------------------------------------------------------------------------------------------------|-------------------------------------------------------------------------------------------------------------------------------------------------------------------------------------------------------------------------------------------------------------|------------------------------------|-----------------------------|---------------------------------|
| GF0031729 | 1                               | 0                        | 0                            | 0 Hypothetical protein (1)                                   |                                                                                                                                                                                                         | Leucine-rich repeat domain, L domain-like [IPR032675] (1)                                                                                                                                                                                                   | scaffold_7_mRNA_1747.1             | -                           | -                               |
| GF0031728 | 1                               | 0                        | 0                            | 0 Hypothetical protein (1)                                   |                                                                                                                                                                                                         |                                                                                                                                                                                                                                                             | scaffold_7_mRNA_1741.1             | -                           | -                               |
| GF0031727 | 1                               | 0                        | 0                            | 0 Hypothetical protein (1)                                   |                                                                                                                                                                                                         | P-type ATPase, transmembrane domain [IPR023298] (1)                                                                                                                                                                                                         | scaffold_7_mRNA_1741.1             | -                           | -                               |
| GF0031726 | 1                               | 0                        | 0                            | 0 Hypothetical protein (1)                                   |                                                                                                                                                                                                         | Retrotransposon gag domain [IPR005162] (1)                                                                                                                                                                                                                  | scaffold_7_mRNA_1737.1             | -                           | -                               |
| GF0031725 | 1                               | 0                        | 0                            | 0 LRR receptor-like serine/threonine-protein kinase GSO1 (1) | protein binding [GO:0005515] molecular_function (1)                                                                                                                                                     | Leucine-rich repeat, typical subtype [IPR003591] (1); Leucine-rich repeat domain, L domain-like [IPR032675] (1)                                                                                                                                             | scaffold_7_mRNA_1735.1             | -                           | -                               |
| GF0031724 | 1                               | 0                        | 0                            | 0 Hypothetical protein (1)                                   |                                                                                                                                                                                                         | Leucine-rich repeat, typical subtype [IPR003591] (1); Leucine-rich repeat domain, L domain-like [IPR032675] (1)                                                                                                                                             | scaffold_7_mRNA_1734.1             | -                           | -                               |
| GF0031723 | 1                               | 0                        | 0                            | 0 Hypothetical protein (1)                                   | protein binding [GO:0005515] molecular_function (1)                                                                                                                                                     | Leucine-rich repeat, typical subtype [IPR003591] (1); Leucine-rich repeat domain, L domain-like [IPR032675] (1); Leucine-rich repeat [IPR001611] (1); Leucine-rich repeat-containing N-terminal, plant-type [IPR013210] (1)                                 | scaffold_7_mRNA_1731.1             | -                           | -                               |
| GF0031722 | 1                               | 0                        | 0                            | 0 Hypothetical protein (1)                                   |                                                                                                                                                                                                         |                                                                                                                                                                                                                                                             | scaffold_7_mRNA_1730.1             | -                           | -                               |
| GF0031721 | 1                               | 0                        | 0                            | 0 Hypothetical protein (1)                                   |                                                                                                                                                                                                         |                                                                                                                                                                                                                                                             | scaffold_7_mRNA_1729.1             | -                           | -                               |
| GF0031720 | 1                               | 0                        | 0                            | 0 Hypothetical protein (1)                                   |                                                                                                                                                                                                         |                                                                                                                                                                                                                                                             | scaffold_7_mRNA_1728.1             | -                           | -                               |
| GF0031719 | 1                               | 0                        | 0                            | 0 Eukaryotic translation initiation factor 3 subunit (1)     | protein binding [GO:0005515] molecular_function (1)                                                                                                                                                     | Tetratricopeptide-like helical domain [IPR011990] (1); Tetratricopeptide repeat-containing domain [IPR013026] (1); Tetratricopeptide repeat [IPR019734] (1); Winged helix-turn-helix DNA-binding domain [IPR011991] (1); CLU central domain [IPR033646] (1) | scaffold_7_mRNA_1723.1             | -                           | -                               |
| GF0031718 | 1                               | 0                        | 0                            | 0 Hypothetical protein (1)                                   |                                                                                                                                                                                                         |                                                                                                                                                                                                                                                             | scaffold_7_mRNA_1722.1             | -                           | -                               |
| GF0031717 | 1                               | 0                        | 0                            | 0 Hypothetical protein (1)                                   |                                                                                                                                                                                                         | Aspartic peptidase domain [IPR021109] (1); Retrotransposon gag domain [IPR005162] (1)                                                                                                                                                                       | scaffold_7_mRNA_1721.1             | -                           | -                               |
| GF0031716 | 1                               | 0                        | 0                            | 0 Hypothetical protein (1)                                   |                                                                                                                                                                                                         |                                                                                                                                                                                                                                                             | scaffold_7_mRNA_1719.1             | -                           | -                               |
| GF0031715 | 1                               | 0                        | 0                            | 0 Disease resistance protein RPS2 (1)                        | ADP binding [GO:0043531] molecular_function (1); protein binding [GO:0005515] molecular_function (1)                                                                                                    | P-loop containing nucleoside triphosphate hydrolase [IPR027417] (1); NB-ARC [IPR021182] (1); Leucine-rich repeat domain, L domain-like [IPR032675] (1); Winged helix-turn-helix DNA-binding domain [IPR011991] (1)                                          | scaffold_7_mRNA_1713.1             | -                           | -                               |
| GF0031714 | 1                               | 0                        | 0                            | 0 Hypothetical protein (1)                                   |                                                                                                                                                                                                         |                                                                                                                                                                                                                                                             | scaffold_7_mRNA_1712.1             | -                           | -                               |
| GF0031713 | 1                               | 0                        | 0                            | 0 Hypothetical protein (1)                                   |                                                                                                                                                                                                         |                                                                                                                                                                                                                                                             | scaffold_7_mRNA_1711.1             | -                           | -                               |
| GF0031712 | 1                               | 0                        | 0                            | 0 Hypothetical protein (1)                                   |                                                                                                                                                                                                         |                                                                                                                                                                                                                                                             | scaffold_7_mRNA_1707.1             | -                           | -                               |
| GF0031711 | 1                               | 0                        | 0                            | 0 Hypothetical protein (1)                                   |                                                                                                                                                                                                         |                                                                                                                                                                                                                                                             | scaffold_7_mRNA_1702.1             | -                           | -                               |
| GF0031710 | 1                               | 0                        | 0                            | 0 Disease resistance protein RPS2 (1)                        | ADP binding [GO:0043531] molecular_function (1)                                                                                                                                                         | Winged helix-turn-helix DNA-binding domain [IPR011991] (1); Leucine-rich repeat domain, L domain-like [IPR032675] (1); NB-ARC [IPR002182] (1); P-loop containing nucleoside triphosphate hydrolase [IPR027417] (1)                                          | scaffold_7_mRNA_1700.1             | -                           | -                               |
| GF0031709 | 1                               | 0                        | 0                            | 0 Caffeic acid 3-O-methyltransferase (1)                     | O-methyltransferase activity [GO:0008171] molecular_function (1); methyltransferase activity [GO:0008168] molecular_function (1)                                                                        | O-methyltransferase COAMT-type [IPR016461] (1); O-methyltransferase, family 2 [IPR001077] (1); S-adenosyl-L-methionine-dependent methyltransferase [IPR029653] (1)                                                                                          | scaffold_7_mRNA_1701.1             | -                           | -                               |
| GF0031708 | 1                               | 0                        | 0                            | 0 Disease resistance protein RPS2 (1)                        | ADP binding [GO:0043531] molecular_function (1)                                                                                                                                                         | Leucine-rich repeat domain, L domain-like [IPR032675] (1); Winged helix-turn-helix DNA-binding domain [IPR011991] (1); P-loop containing nucleoside triphosphate hydrolase [IPR027417] (1); NB-ARC [IPR002182] (1)                                          | scaffold_7_mRNA_1698.1             | -                           | -                               |
| GF0031707 | 1                               | 0                        | 0                            | 0 Hypothetical protein (1)                                   |                                                                                                                                                                                                         |                                                                                                                                                                                                                                                             | scaffold_7_mRNA_1697.1             | -                           | -                               |
| GF0031706 | 1                               | 0                        | 0                            | 0 Disease resistance protein RPS2 (1)                        | protein binding [GO:0005515] molecular_function (1); ADP binding [GO:0043531] molecular_function (1)                                                                                                    | Leucine-rich repeat domain, L domain-like [IPR032675] (1); Winged helix-turn-helix DNA-binding domain [IPR011991] (1); P-loop containing nucleoside triphosphate hydrolase [IPR027417] (1); NB-ARC [IPR002182] (1)                                          | scaffold_7_mRNA_1696.1             | -                           | -                               |
| GF0031705 | 1                               | 0                        | 0                            | 0 Disease resistance protein family (1)                      |                                                                                                                                                                                                         | Leucine-rich repeat domain, L domain-like [IPR032675] (1)                                                                                                                                                                                                   | scaffold_7_mRNA_1695.1             | -                           | -                               |
| GF0031704 | 1                               | 0                        | 0                            | 0 Disease resistance protein (1)                             | ADP binding [GO:0043531] molecular_function (1)                                                                                                                                                         | NB-ARC [IPR002182] (1); P-loop containing nucleoside triphosphate hydrolase [IPR027417] (1); Leucine-rich repeat domain, L domain-like [IPR032675] (1); Winged helix-turn-helix DNA-binding domain [IPR011991] (1)                                          | scaffold_7_mRNA_1694.1             | -                           | -                               |
| GF0031703 | 1                               | 0                        | 0                            | 0 Hypothetical protein (1)                                   | DNA damage checkpoint [GO:0000077] biological_process (1); checkpoint clamp complex [GO:0030896] cellular_component (1)                                                                                 | Checkpoint protein Hus1/Mec3 [IPR007150] (1); Reverse transcriptase, RNA-dependent DNA polymerase [IPR013103] (1)                                                                                                                                           | scaffold_7_mRNA_1691.1             | -                           | -                               |
| GF0031702 | 1                               | 0                        | 0                            | 0 Disease resistance protein RPS2 (1)                        | ADP binding [GO:0043531] molecular_function (1)                                                                                                                                                         | Leucine-rich repeat domain, L domain-like [IPR032675] (1); Winged helix-turn-helix DNA-binding domain [IPR011991] (1); NB-ARC [IPR002182] (1); P-loop containing nucleoside triphosphate hydrolase [IPR027417] (1)                                          | scaffold_7_mRNA_1690.1             | -                           | -                               |
| GF0031701 | 1                               | 0                        | 0                            | 0 Mutator-like transposase (1)                               | zinc ion binding [GO:0008270] molecular_function (1)                                                                                                                                                    | Zinc finger, SWIM-type [IPR007527] (1); Transposase, Mu/DR, plant [IPR004332] (1); Zinc finger, PMZ-type [IPR006564] (1); MULE transposase domain [IPR015289] (1)                                                                                           | scaffold_7_mRNA_1688.1             | -                           | -                               |
| GF0031700 | 1                               | 0                        | 0                            | 0 Hus1 domain-containing protein (1)                         | DNA damage checkpoint [GO:0000077] biological_process (1); regulation of transcription, DNA-templated [GO:0006355] biological_process (1); checkpoint clamp complex [GO:0030896] cellular_component (1) | FHY3/FAR1 family [IPR031052] (1); Checkpoint protein Hus1/Mec3 [IPR007150] (1)                                                                                                                                                                              | scaffold_7_mRNA_1686.1             | -                           | -                               |
| GF0031699 | 1                               | 0                        | 0                            | 0 Hypothetical protein (1)                                   | nucleic acid binding [GO:0003676] molecular_function (1)                                                                                                                                                | Ribonuclease H-like domain [IPR012377] (1)                                                                                                                                                                                                                  | scaffold_7_mRNA_1680.1             | -                           | -                               |
| GF0031698 | 1                               | 0                        | 0                            | 0 Disease resistance protein (1)                             | ADP binding [GO:0043531] molecular_function (1); protein binding [GO:0005515] molecular_function (1)                                                                                                    | Winged helix-turn-helix DNA-binding domain [IPR011991] (1); Leucine-rich repeat domain, L domain-like [IPR032675] (1); Leucine-rich repeat [IPR001611] (1); NB-ARC [IPR002182] (1); P-loop containing nucleoside triphosphate hydrolase [IPR027417] (1)     | scaffold_7_mRNA_1676.1             | -                           | -                               |
| GF0031697 | 1                               | 0                        | 0                            | 0 Hypothetical protein (1)                                   |                                                                                                                                                                                                         |                                                                                                                                                                                                                                                             | scaffold_7_mRNA_1675.1             | -                           | -                               |
| GF0031696 | 1                               | 0                        | 0                            | 0 Hypothetical protein (1)                                   | ADP binding [GO:0043531] molecular_function (1)                                                                                                                                                         | NB-ARC [IPR002182] (1); AAA+ ATPase domain [IPR003593] (1); P-loop containing nucleoside triphosphate hydrolase [IPR027417] (1); Winged helix-turn-helix DNA-binding domain [IPR011991] (1); Leucine-rich repeat domain, L domain-like [IPR032675] (1)      | scaffold_7_mRNA_1674.1             | -                           | -                               |
| GF0031695 | 1                               | 0                        | 0                            | 0 Hypothetical protein (1)                                   | zinc ion binding [GO:0008270] molecular_function (1); regulation of transcription, DNA-templated [GO:0006355] biological_process (1)                                                                    | FHY3/FAR1 family [IPR031052] (1); FAR1 DNA binding domain [IPR004330] (1); Zinc finger, PMZ-type [IPR006564] (1); Zinc finger, SWIM-type [IPR007527] (1)                                                                                                    | scaffold_7_mRNA_1672.1             | -                           | -                               |
| GF0031694 | 1                               | 0                        | 0                            | 0 HUS1 checkpoint protein (1)                                | DNA damage checkpoint [GO:0000077] biological_process (1); checkpoint clamp complex [GO:0030896] cellular_component (1); nucleolus [GO:0005730] cellular_component (1)                                  | Cell cycle checkpoint, Hus1 [IPR016580] (1); Checkpoint protein Hus1/Mec3 [IPR007150] (1)                                                                                                                                                                   | scaffold_7_mRNA_1671.1             | -                           | -                               |
| GF0031693 | 1                               | 0                        | 0                            | 0 Hypothetical protein (1)                                   |                                                                                                                                                                                                         |                                                                                                                                                                                                                                                             | scaffold_7_mRNA_1671.1             | -                           | -                               |
| GF0031692 | 1                               | 0                        | 0                            | 0 NBS-LRR type disease resistance protein (1)                | ADP binding [GO:0043531] molecular_function (1)                                                                                                                                                         | P-loop containing nucleoside triphosphate hydrolase [IPR027417] (1); NB-ARC [IPR021182] (1); Leucine-rich repeat domain, L domain-like [IPR032675] (1); Winged helix-turn-helix DNA-binding domain [IPR011991] (1)                                          | scaffold_7_mRNA_1669.1             | -                           | -                               |
| GF0031691 | 1                               | 0                        | 0                            | 0 Disease resistance RPS2-like protein (1)                   |                                                                                                                                                                                                         | Leucine-rich repeat domain, L domain-like [IPR032675] (1)                                                                                                                                                                                                   | scaffold_7_mRNA_1667.1             | -                           | -                               |
| GF0031690 | 1                               | 0                        | 0                            | 0 Disease resistance protein RPS2 (1)                        | ADP binding [GO:0043531] molecular_function (1)                                                                                                                                                         | P-loop containing nucleoside triphosphate hydrolase [IPR027417] (1); NB-ARC [IPR021182] (1); Leucine-rich repeat domain, L domain-like [IPR032675] (1); Winged helix-turn-helix DNA-binding domain [IPR011991] (1)                                          | scaffold_7_mRNA_1664.1             | -                           | -                               |
| GF0031689 | 1                               | 0                        | 0                            | 0 HUS1 checkpoint protein (1)                                | checkpoint clamp complex [GO:0030896] cellular_component (1); DNA damage checkpoint [GO:0000077] biological_process (1); nucleolus [GO:0005730] cellular_component (1)                                  | Checkpoint protein Hus1/Mec3 [IPR007150] (1); Cell cycle checkpoint, Hus1 [IPR016580] (1)                                                                                                                                                                   | scaffold_7_mRNA_1663.1             | -                           | -                               |

| ID        | Num. in <i>C. clementiae</i> | Num. in <i>C. uchiha</i> | Num. in <i>P. trifoliata</i> | Note                                                                                     | GO                                                                                                                                                                                                      | InterPro                                                                                                                                                                                                                                                                                                                                          | Members in <i>C. clementiae</i> | Members in <i>C. uchiha</i> | Members in <i>P. trifoliata</i> |
|-----------|------------------------------|--------------------------|------------------------------|------------------------------------------------------------------------------------------|---------------------------------------------------------------------------------------------------------------------------------------------------------------------------------------------------------|---------------------------------------------------------------------------------------------------------------------------------------------------------------------------------------------------------------------------------------------------------------------------------------------------------------------------------------------------|---------------------------------|-----------------------------|---------------------------------|
| GF0031688 | 1                            | 0                        | 0                            | Disease resistance protein RPS2 (1)                                                      | protein binding [GO:0005515 molecular_function] (1); ADP binding [GO:0043531 molecular_function] (1)                                                                                                    | Winged helix-turn-helix DNA-binding domain [IPR011991] (1); Leucine-rich repeat domain, L domain-like [IPR032675] (1); Leucine-rich repeat [IPR001611] (1); NB-ARC [IPR002182] (1); P-loop containing nucleoside triphosphate hydrolase [IPR027417] (1)                                                                                           | scaffold_7_mRNA_1662.1          | -                           | -                               |
| GF0031687 | 1                            | 0                        | 0                            | Hypothetical protein (1)                                                                 |                                                                                                                                                                                                         |                                                                                                                                                                                                                                                                                                                                                   | scaffold_7_mRNA_1661.1          | -                           | -                               |
| GF0031686 | 1                            | 0                        | 0                            | Hypothetical protein (1)                                                                 |                                                                                                                                                                                                         | Myb/SANT-like domain [IPR024752] (1); Harbinger transposase-derived nuclease domain [IPR027866] (1)                                                                                                                                                                                                                                               | scaffold_7_mRNA_1657.1          | -                           | -                               |
| GF0031685 | 1                            | 0                        | 0                            | Hypothetical protein (1)                                                                 | ADP binding [GO:0043531 molecular_function] (1)                                                                                                                                                         | P-loop containing nucleoside triphosphate hydrolase [IPR027417] (1); NB-ARC [IPR002182] (1)                                                                                                                                                                                                                                                       | scaffold_7_mRNA_1656.1          | -                           | -                               |
| GF0031684 | 1                            | 0                        | 0                            | Disease resistance protein RPS2 (1)                                                      | ADP binding [GO:0043531 molecular_function] (1); protein binding [GO:0005515 molecular_function] (1)                                                                                                    | Winged helix-turn-helix DNA-binding domain [IPR011991] (1); Leucine-rich repeat domain, L domain-like [IPR032675] (1); Leucine-rich repeat, typical subtype [IPR003591] (1); NB-ARC [IPR002182] (1); Leucine-rich repeat [IPR001611] (1); AAA+ ATPase domain [IPR003593] (1); P-loop containing nucleoside triphosphate hydrolase [IPR027417] (1) | scaffold_7_mRNA_1654.1          | -                           | -                               |
| GF0031683 | 1                            | 0                        | 0                            | Hypothetical protein (1)                                                                 | ADP binding [GO:0043531 molecular_function] (1)                                                                                                                                                         | P-loop containing nucleoside triphosphate hydrolase [IPR027417] (1); NB-ARC [IPR002182] (1)                                                                                                                                                                                                                                                       | scaffold_7_mRNA_1653.1          | -                           | -                               |
| GF0031682 | 1                            | 0                        | 0                            | Hypothetical protein (1)                                                                 |                                                                                                                                                                                                         | AAA+ ATPase domain [IPR003593] (1); NB-ARC [IPR002182] (1); P-loop containing nucleoside triphosphate hydrolase [IPR027417] (1)                                                                                                                                                                                                                   | scaffold_7_mRNA_1652.1          | -                           | -                               |
| GF0031681 | 1                            | 0                        | 0                            | Disease resistance protein RPS2 (1)                                                      | ADP binding [GO:0043531 molecular_function] (1)                                                                                                                                                         | Winged helix-turn-helix DNA-binding domain [IPR011991] (1); Leucine-rich repeat domain, L domain-like [IPR032675] (1)                                                                                                                                                                                                                             | scaffold_7_mRNA_1649.1          | -                           | -                               |
| GF0031680 | 1                            | 0                        | 0                            | Hypothetical protein (1)                                                                 |                                                                                                                                                                                                         | Winged helix-turn-helix DNA-binding domain [IPR011991] (1); Leucine-rich repeat domain, L domain-like [IPR032675] (1)                                                                                                                                                                                                                             | scaffold_7_mRNA_1648.1          | -                           | -                               |
| GF0031679 | 1                            | 0                        | 0                            | HUS1 checkpoint protein (1)                                                              | nucleolus [GO:0005730 cellular_component] (1); DNA damage checkpoint [GO:0000077 biological_process] (1); checkpoint clamp complex [GO:0030896 cellular_component] (1)                                  | Checkpoint protein Hus1/Mec3 [IPR07150] (1); Cell cycle checkpoint, Hus1 [IPR016580] (1)                                                                                                                                                                                                                                                          | scaffold_7_mRNA_1647.1          | -                           | -                               |
| GF0031678 | 1                            | 0                        | 0                            | RNA-directed DNA polymerase (Reverse transcriptase) (1)                                  |                                                                                                                                                                                                         | Leucine-rich repeat domain, L domain-like [IPR032675] (1); Reverse transcriptase domain [IPR00477] (1)                                                                                                                                                                                                                                            | scaffold_7_mRNA_1642.1          | -                           | -                               |
| GF0031677 | 1                            | 0                        | 0                            | Hypothetical protein (1)                                                                 | nucleic acid binding [GO:0003676 molecular_function] (1)                                                                                                                                                | Ribonuclease H-like domain [IPR012337] (1)                                                                                                                                                                                                                                                                                                        | scaffold_7_mRNA_164.1           | -                           | -                               |
| GF0031676 | 1                            | 0                        | 0                            | Hypothetical protein (1)                                                                 | zinc ion binding [GO:0008270 molecular_function] (1); nucleic acid binding [GO:0003676 molecular_function] (1)                                                                                          | Zinc finger, CCHC-type [IPR001878] (1)                                                                                                                                                                                                                                                                                                            | scaffold_7_mRNA_1638.1          | -                           | -                               |
| GF0031675 | 1                            | 0                        | 0                            | Disease resistance protein RPS2 (1)                                                      | ADP binding [GO:0043531 molecular_function] (1)                                                                                                                                                         | Winged helix-turn-helix DNA-binding domain [IPR011991] (1); Leucine-rich repeat domain, L domain-like [IPR032675] (1); NB-ARC [IPR002182] (1); P-loop containing nucleoside triphosphate hydrolase [IPR027417] (1)                                                                                                                                | scaffold_7_mRNA_1636.1          | -                           | -                               |
| GF0031674 | 1                            | 0                        | 0                            | Hypothetical protein (1)                                                                 |                                                                                                                                                                                                         |                                                                                                                                                                                                                                                                                                                                                   | scaffold_7_mRNA_1633.1          | -                           | -                               |
| GF0031673 | 1                            | 0                        | 0                            | HUS1 checkpoint protein (1)                                                              | DNA damage checkpoint [GO:0000077 biological_process] (1); checkpoint clamp complex [GO:0030896 cellular_component] (1); nucleolus [GO:0005730 cellular_component] (1)                                  | Cell cycle checkpoint, Hus1 [IPR016580] (1); Checkpoint protein Hus1/Mec3 [IPR07150] (1)                                                                                                                                                                                                                                                          | scaffold_7_mRNA_1628.1          | -                           | -                               |
| GF0031672 | 1                            | 0                        | 0                            | Hypothetical protein (1)                                                                 | checkpoint clamp complex [GO:0030896 cellular_component] (1); regulation of transcription, DNA-templated [GO:0006355 biological_process] (1); DNA damage checkpoint [GO:0000077 biological_process] (1) | FAR1 DNA binding domain [IPR04310] (1); FHY/FAR1 family [IPR031052] (1); Checkpoint protein Hus1/Mec3 [IPR007150] (1)                                                                                                                                                                                                                             | scaffold_7_mRNA_1625.1          | -                           | -                               |
| GF0031671 | 1                            | 0                        | 0                            | Disease resistance protein (1)                                                           | ADP binding [GO:0043531 molecular_function] (1)                                                                                                                                                         | Leucine-rich repeat domain, L domain-like [IPR032675] (1); NB-ARC [IPR002182] (1); P-loop containing nucleoside triphosphate hydrolase [IPR027417] (1)                                                                                                                                                                                            | scaffold_7_mRNA_1624.1          | -                           | -                               |
| GF0031670 | 1                            | 0                        | 0                            | Disease resistance protein RPS2 (1)                                                      | ADP binding [GO:0043531 molecular_function] (1)                                                                                                                                                         | NB-ARC [IPR002182] (1); P-loop containing nucleoside triphosphate hydrolase [IPR027417] (1); Winged helix-turn-helix DNA-binding domain [IPR011991] (1); Leucine-rich repeat domain, L domain-like [IPR032675] (1)                                                                                                                                | scaffold_7_mRNA_1623.1          | -                           | -                               |
| GF0031669 | 1                            | 0                        | 0                            | Hypothetical protein (1)                                                                 |                                                                                                                                                                                                         |                                                                                                                                                                                                                                                                                                                                                   | scaffold_7_mRNA_162.1           | -                           | -                               |
| GF0031668 | 1                            | 0                        | 0                            | NBS-LRR type disease resistance protein (1)                                              | ADP binding [GO:0043531 molecular_function] (1)                                                                                                                                                         | Leucine-rich repeat domain, L domain-like [IPR032675] (1); Winged helix-turn-helix DNA-binding domain [IPR011991] (1); NB-ARC [IPR002182] (1); P-loop containing nucleoside triphosphate hydrolase [IPR027417] (1)                                                                                                                                | scaffold_7_mRNA_1619.1          | -                           | -                               |
| GF0031667 | 1                            | 0                        | 0                            | Hypothetical protein (1)                                                                 |                                                                                                                                                                                                         | Domain of unknown function DUF1985 [IPR015410] (1)                                                                                                                                                                                                                                                                                                | scaffold_7_mRNA_1618.1          | -                           | -                               |
| GF0031666 | 1                            | 0                        | 0                            | Hypothetical protein (1)                                                                 |                                                                                                                                                                                                         | CBS domain [IPR000644] (1)                                                                                                                                                                                                                                                                                                                        | scaffold_7_mRNA_1596.1          | -                           | -                               |
| GF0031665 | 1                            | 0                        | 0                            | Hypothetical protein (1)                                                                 |                                                                                                                                                                                                         |                                                                                                                                                                                                                                                                                                                                                   | scaffold_7_mRNA_1591.1          | -                           | -                               |
| GF0031664 | 1                            | 0                        | 0                            | Hypothetical protein (1)                                                                 |                                                                                                                                                                                                         |                                                                                                                                                                                                                                                                                                                                                   | scaffold_7_mRNA_1587.1          | -                           | -                               |
| GF0031663 | 1                            | 0                        | 0                            | Hypothetical protein (1)                                                                 |                                                                                                                                                                                                         |                                                                                                                                                                                                                                                                                                                                                   | scaffold_7_mRNA_1585.1          | -                           | -                               |
| GF0031662 | 1                            | 0                        | 0                            | Hypothetical protein (1)                                                                 |                                                                                                                                                                                                         |                                                                                                                                                                                                                                                                                                                                                   | scaffold_7_mRNA_1584.1          | -                           | -                               |
| GF0031661 | 1                            | 0                        | 0                            | Hypothetical protein (1)                                                                 |                                                                                                                                                                                                         |                                                                                                                                                                                                                                                                                                                                                   | scaffold_7_mRNA_1579.1          | -                           | -                               |
| GF0031660 | 1                            | 0                        | 0                            | Hypothetical protein (1)                                                                 |                                                                                                                                                                                                         |                                                                                                                                                                                                                                                                                                                                                   | scaffold_7_mRNA_1577.1          | -                           | -                               |
| GF0031659 | 1                            | 0                        | 0                            | Hypothetical protein (1)                                                                 | nucleic acid binding [GO:0003676 molecular_function] (1); zinc ion binding [GO:0008270 molecular_function] (1)                                                                                          | Zinc finger, CCHC-type [IPR001878] (1)                                                                                                                                                                                                                                                                                                            | scaffold_7_mRNA_1568.1          | -                           | -                               |
| GF0031658 | 1                            | 0                        | 0                            | Ribonuclease H-like superfamily protein (1)                                              | nucleic acid binding [GO:0003676 molecular_function] (1)                                                                                                                                                | Reverse transcriptase zinc-binding domain [IPR05960] (1); Ribonuclease H-like domain [IPR012337] (1)                                                                                                                                                                                                                                              | scaffold_7_mRNA_1566.1          | -                           | -                               |
| GF0031657 | 1                            | 0                        | 0                            | Hypothetical protein (1)                                                                 |                                                                                                                                                                                                         |                                                                                                                                                                                                                                                                                                                                                   | scaffold_7_mRNA_1565.1          | -                           | -                               |
| GF0031656 | 1                            | 0                        | 0                            | S-adenosyl-L-methionine-dependent O-methyltransferases superfamily protein isoform 2 (1) | O-methyltransferase activity [GO:0008171 molecular_function] (1)                                                                                                                                        | S-adenosyl-L-methionine-dependent methyltransferase [IPR029063] (1); O-methyltransferase, family 3 [IPR002935] (1)                                                                                                                                                                                                                                | scaffold_7_mRNA_1559.1          | -                           | -                               |
| GF0031655 | 1                            | 0                        | 0                            | Hypothetical protein (1)                                                                 |                                                                                                                                                                                                         |                                                                                                                                                                                                                                                                                                                                                   | scaffold_7_mRNA_1557.1          | -                           | -                               |
| GF0031654 | 1                            | 0                        | 0                            | Hypothetical protein (1)                                                                 | ADP binding [GO:0043531 molecular_function] (1)                                                                                                                                                         | NB-ARC [IPR002182] (1); P-loop containing nucleoside triphosphate hydrolase [IPR027417] (1)                                                                                                                                                                                                                                                       | scaffold_7_mRNA_1555.1          | -                           | -                               |
| GF0031653 | 1                            | 0                        | 0                            | Putative non-LTR retroelement reverse transcriptase (1)                                  | nucleic acid binding [GO:0003676 molecular_function] (1)                                                                                                                                                | TB2/DPI/HV A22-related protein [IPR004345] (1); Ribonuclease H-like domain [IPR012337] (1); Reverse transcriptase zinc-binding domain [IPR026960] (1)                                                                                                                                                                                             | scaffold_7_mRNA_1554.1          | -                           | -                               |
| GF0031652 | 1                            | 0                        | 0                            | Hypothetical protein (1)                                                                 |                                                                                                                                                                                                         | Retrotransposon gag domain [IPR005162] (1)                                                                                                                                                                                                                                                                                                        | scaffold_7_mRNA_1536.1          | -                           | -                               |
| GF0031651 | 1                            | 0                        | 0                            | Hypothetical protein (1)                                                                 |                                                                                                                                                                                                         |                                                                                                                                                                                                                                                                                                                                                   | scaffold_7_mRNA_1534.1          | -                           | -                               |
| GF0031650 | 1                            | 0                        | 0                            | Hypothetical protein (1)                                                                 |                                                                                                                                                                                                         |                                                                                                                                                                                                                                                                                                                                                   | scaffold_7_mRNA_1533.1          | -                           | -                               |
| GF0031649 | 1                            | 0                        | 0                            | Hypothetical protein (1)                                                                 |                                                                                                                                                                                                         |                                                                                                                                                                                                                                                                                                                                                   | scaffold_7_mRNA_1532.1          | -                           | -                               |
| GF0031648 | 1                            | 0                        | 0                            | Cytokinin riboside 5'-monophosphate phosphoribohydrolase (1)                             |                                                                                                                                                                                                         | Cytokinin riboside 5'-monophosphate phosphoribohydrolase LOG [IPR005269] (1); LOG family [IPR031100] (1)                                                                                                                                                                                                                                          | scaffold_7_mRNA_1515.1          | -                           | -                               |
| GF0031647 | 1                            | 0                        | 0                            | Hypothetical protein (1)                                                                 |                                                                                                                                                                                                         |                                                                                                                                                                                                                                                                                                                                                   | scaffold_7_mRNA_1514.1          | -                           | -                               |
| GF0031646 | 1                            | 0                        | 0                            | Hypothetical protein (1)                                                                 |                                                                                                                                                                                                         | Aspartic peptidase domain [IPR021109] (1); Retrotransposon gag domain [IPR005162] (1)                                                                                                                                                                                                                                                             | scaffold_7_mRNA_1513.1          | -                           | -                               |
| GF0031645 | 1                            | 0                        | 0                            | Hypothetical protein (1)                                                                 |                                                                                                                                                                                                         |                                                                                                                                                                                                                                                                                                                                                   | scaffold_7_mRNA_149.1           | -                           | -                               |
| GF0031644 | 1                            | 0                        | 0                            | Mutator-like transposase (1)                                                             | zinc ion binding [GO:0008270 molecular_function] (1)                                                                                                                                                    | Zinc finger, PMZ-type [IPR006564] (1); MULE transposase domain [IPR018289] (1); Transposase, Mu/DR plant [IPR004332] (1); Zinc finger, SWIM-type [IPR003527] (1)                                                                                                                                                                                  | scaffold_7_mRNA_1481.1          | -                           | -                               |
| GF0031643 | 1                            | 0                        | 0                            | Hypothetical protein (1)                                                                 | cysteine-type peptidase activity [GO:0008234 molecular_function] (1); proteolysis [GO:0006508 biological_process] (1)                                                                                   | Domain of unknown function DUF1985 [IPR015410] (1); Ulp1 protease family, C-terminal catalytic domain [IPR003653] (1)                                                                                                                                                                                                                             | scaffold_7_mRNA_1480.1          | -                           | -                               |
| GF0031642 | 1                            | 0                        | 0                            | Hypothetical protein (1)                                                                 | ADP binding [GO:0043531 molecular_function] (1)                                                                                                                                                         | P-loop containing nucleoside triphosphate hydrolase [IPR027417] (1); NB-ARC [IPR002182] (1)                                                                                                                                                                                                                                                       | scaffold_7_mRNA_1475.1          | -                           | -                               |
| GF0031641 | 1                            | 0                        | 0                            | Disease resistance RPS5-like protein (1)                                                 |                                                                                                                                                                                                         | Leucine-rich repeat domain, L domain-like [IPR032675] (1)                                                                                                                                                                                                                                                                                         | scaffold_7_mRNA_1471.1          | -                           | -                               |
| GF0031640 | 1                            | 0                        | 0                            | Hypothetical protein (1)                                                                 |                                                                                                                                                                                                         | Leucine-rich repeat domain, L domain-like [IPR032675] (1)                                                                                                                                                                                                                                                                                         | scaffold_7_mRNA_1462.1          | -                           | -                               |
| GF0031639 | 1                            | 0                        | 0                            | Disease resistance protein family, putative (1)                                          |                                                                                                                                                                                                         | Leucine-rich repeat domain, L domain-like [IPR032675] (1)                                                                                                                                                                                                                                                                                         | scaffold_7_mRNA_1461.1          | -                           | -                               |

| ID        | Num. in <i>C. clementinae</i> | Num. in <i>C. uchiha</i> | Num. in <i>P. trifoliata</i> | Note                                                                                                      | GO                                                                                                                                                                                                                                                                                                                                                                      | InterPro                                                                                                                                                                                                                                                                                                                                                                                                                                                                                   | Members in <i>C. clementinae</i> | Members in <i>C. uchiha</i> | Members in <i>P. trifoliata</i> |
|-----------|-------------------------------|--------------------------|------------------------------|-----------------------------------------------------------------------------------------------------------|-------------------------------------------------------------------------------------------------------------------------------------------------------------------------------------------------------------------------------------------------------------------------------------------------------------------------------------------------------------------------|--------------------------------------------------------------------------------------------------------------------------------------------------------------------------------------------------------------------------------------------------------------------------------------------------------------------------------------------------------------------------------------------------------------------------------------------------------------------------------------------|----------------------------------|-----------------------------|---------------------------------|
| GF0031638 | 1                             | 0                        | 0                            | 0 Disease resistance protein (1)                                                                          | protein binding [GO:0005515 molecular_function] (1); ADP binding [GO:004531 molecular_function] (1)                                                                                                                                                                                                                                                                     | Leucine-rich repeat domain, L domain-like [IPRO22675] (1); Winged helix-turn-helix DNA-binding domain [IPRO11991] (1); P-loop containing nucleoside triphosphate hydrolase [IPRO27417] (1); AAA+ ATPase domain [IPRO03593] (1); Leucine-rich repeat [IPRO01611] (1); NB-ARC [IPRO02182] (1)                                                                                                                                                                                                | scaffold_7_mRNA_1460.1           | -                           | -                               |
| GF0031637 | 1                             | 0                        | 0                            | 0 Hypothetical protein (1)                                                                                | membrane [GO:0016020 cellular_component] (1)                                                                                                                                                                                                                                                                                                                            | ABC-2 type transporter [IPRO13525] (1); P-loop containing nucleoside triphosphate hydrolase [IPRO27417] (1)                                                                                                                                                                                                                                                                                                                                                                                | scaffold_7_mRNA_1449.1           | -                           | -                               |
| GF0031636 | 1                             | 0                        | 0                            | 0 Hypothetical protein (1)                                                                                |                                                                                                                                                                                                                                                                                                                                                                         |                                                                                                                                                                                                                                                                                                                                                                                                                                                                                            | scaffold_7_mRNA_1445.1           | -                           | -                               |
| GF0031635 | 1                             | 0                        | 0                            | 0 Hypothetical protein (1)                                                                                |                                                                                                                                                                                                                                                                                                                                                                         |                                                                                                                                                                                                                                                                                                                                                                                                                                                                                            | scaffold_7_mRNA_1444.1           | -                           | -                               |
| GF0031634 | 1                             | 0                        | 0                            | 0 Hypothetical protein (1)                                                                                |                                                                                                                                                                                                                                                                                                                                                                         |                                                                                                                                                                                                                                                                                                                                                                                                                                                                                            | scaffold_7_mRNA_1443.1           | -                           | -                               |
| GF0031633 | 1                             | 0                        | 0                            | 0 Hypothetical protein (1)                                                                                |                                                                                                                                                                                                                                                                                                                                                                         |                                                                                                                                                                                                                                                                                                                                                                                                                                                                                            | scaffold_7_mRNA_1426.1           | -                           | -                               |
| GF0031632 | 1                             | 0                        | 0                            | 0 Wall-associated receptor kinase 2 (1)                                                                   | protein kinase activity [GO:0004672 molecular_function] (1); protein phosphorylation [GO:0006468 biological_process] (1); ATP binding [GO:000524 molecular_function] (1); polysaccharide binding [GO:0030247 molecular_function] (1)                                                                                                                                    | Protein kinase domain [IPRO00719] (1); Protein kinase-like domain [IPRO11009] (1); Wall-associated receptor kinase, galacturonan-binding domain [IPRO25287] (1); Serine/threonine-protein kinase, active site [IPRO08271] (1); Serine/threonine-tyrosine-protein kinase, catalytic domain [IPRO01245] (1)                                                                                                                                                                                  | scaffold_7_mRNA_1424.1           | -                           | -                               |
| GF0031631 | 1                             | 0                        | 0                            | 0 Hypothetical protein (1)                                                                                |                                                                                                                                                                                                                                                                                                                                                                         | Domain of unknown function DUF4283 [IPRO25558] (1)                                                                                                                                                                                                                                                                                                                                                                                                                                         | scaffold_7_mRNA_1423.1           | -                           | -                               |
| GF0031630 | 1                             | 0                        | 0                            | 0 Hypothetical protein (1)                                                                                |                                                                                                                                                                                                                                                                                                                                                                         |                                                                                                                                                                                                                                                                                                                                                                                                                                                                                            | scaffold_7_mRNA_1422.1           | -                           | -                               |
| GF0031629 | 1                             | 0                        | 0                            | 0 Polynucleotidyl transferase, Ribonuclease H fold (1)                                                    | nucleic acid binding [GO:0003676 molecular_function] (1)                                                                                                                                                                                                                                                                                                                | Ribonuclease H-like domain [IPRO12337] (1)                                                                                                                                                                                                                                                                                                                                                                                                                                                 | scaffold_7_mRNA_1421.1           | -                           | -                               |
| GF0031628 | 1                             | 0                        | 0                            | 0 Hypothetical protein (1)                                                                                |                                                                                                                                                                                                                                                                                                                                                                         |                                                                                                                                                                                                                                                                                                                                                                                                                                                                                            | scaffold_7_mRNA_1420.1           | -                           | -                               |
| GF0031627 | 1                             | 0                        | 0                            | 0 Wall-associated receptor kinase 2 (1)                                                                   | protein kinase activity [GO:0004672 molecular_function] (1); protein phosphorylation [GO:0006468 biological_process] (1); ATP binding [GO:000524 molecular_function] (1) proteolysis [GO:0006508 biological_process] (1); cysteine-type peptidase activity [GO:0008234 molecular_function] (1)                                                                          | Serine/threonine-protein kinase, active site [IPRO08271] (1); Protein kinase domain [IPRO00719] (1); Protein kinase-like domain [IPRO11009] (1)                                                                                                                                                                                                                                                                                                                                            | scaffold_7_mRNA_1419.1           | -                           | -                               |
| GF0031626 | 1                             | 0                        | 0                            | 0 Hypothetical protein (1)                                                                                |                                                                                                                                                                                                                                                                                                                                                                         | Ulp1 protease family, C-terminal catalytic domain [IPRO03653] (1)                                                                                                                                                                                                                                                                                                                                                                                                                          | scaffold_7_mRNA_1418.1           | -                           | -                               |
| GF0031625 | 1                             | 0                        | 0                            | 0 Monosaccharide transport protein (1)                                                                    |                                                                                                                                                                                                                                                                                                                                                                         |                                                                                                                                                                                                                                                                                                                                                                                                                                                                                            | scaffold_7_mRNA_1416.1           | -                           | -                               |
| GF0031624 | 1                             | 0                        | 0                            | 0 Hypothetical protein (1)                                                                                |                                                                                                                                                                                                                                                                                                                                                                         |                                                                                                                                                                                                                                                                                                                                                                                                                                                                                            | scaffold_7_mRNA_1415.1           | -                           | -                               |
| GF0031623 | 1                             | 0                        | 0                            | 0 Hypothetical protein (1)                                                                                |                                                                                                                                                                                                                                                                                                                                                                         | Retrosposon gag domain [IPRO05162] (1)                                                                                                                                                                                                                                                                                                                                                                                                                                                     | scaffold_7_mRNA_1414.1           | -                           | -                               |
| GF0031622 | 1                             | 0                        | 0                            | 0 Hypothetical protein (1)                                                                                |                                                                                                                                                                                                                                                                                                                                                                         |                                                                                                                                                                                                                                                                                                                                                                                                                                                                                            | scaffold_7_mRNA_1410.1           | -                           | -                               |
| GF0031621 | 1                             | 0                        | 0                            | 0 Cyclin A2 (1)                                                                                           | nucleus [GO:0005634 cellular_component] (1)                                                                                                                                                                                                                                                                                                                             | Cyclin, N-terminal [IPRO06671] (1); Cyclin, C-terminal domain [IPRO04367] (1); Cyclin-like [IPRO13765] (1)                                                                                                                                                                                                                                                                                                                                                                                 | scaffold_7_mRNA_1409.1           | -                           | -                               |
| GF0031620 | 1                             | 0                        | 0                            | 0 Hypothetical protein (1)                                                                                |                                                                                                                                                                                                                                                                                                                                                                         |                                                                                                                                                                                                                                                                                                                                                                                                                                                                                            | scaffold_7_mRNA_1405.1           | -                           | -                               |
| GF0031619 | 1                             | 0                        | 0                            | 0 DNA repair protein XRCC1 (1)                                                                            |                                                                                                                                                                                                                                                                                                                                                                         | BRCT domain [IPRO01357] (1)                                                                                                                                                                                                                                                                                                                                                                                                                                                                | scaffold_7_mRNA_1399.1           | -                           | -                               |
| GF0031618 | 1                             | 0                        | 0                            | 0 Hypothetical protein (1)                                                                                |                                                                                                                                                                                                                                                                                                                                                                         | Aspartic peptidase domain [IPRO21109] (1)                                                                                                                                                                                                                                                                                                                                                                                                                                                  | scaffold_7_mRNA_1397.1           | -                           | -                               |
| GF0031617 | 1                             | 0                        | 0                            | 0 Hypothetical protein (1)                                                                                |                                                                                                                                                                                                                                                                                                                                                                         |                                                                                                                                                                                                                                                                                                                                                                                                                                                                                            | scaffold_7_mRNA_1396.1           | -                           | -                               |
| GF0031616 | 1                             | 0                        | 0                            | 0 Hypothetical protein (1)                                                                                | zinc ion binding [GO:0008270 molecular_function] (1); nucleic acid binding [GO:0003676 molecular_function] (1)                                                                                                                                                                                                                                                          | Reverse transcriptase zinc-binding domain [IPRO25960] (1); Domain of unknown function DUF4283 [IPRO25558] (1); Zinc finger, CCHC-type [IPRO01878] (1)                                                                                                                                                                                                                                                                                                                                      | scaffold_7_mRNA_1391.1           | -                           | -                               |
| GF0031615 | 1                             | 0                        | 0                            | 0 Hypothetical protein (1)                                                                                |                                                                                                                                                                                                                                                                                                                                                                         |                                                                                                                                                                                                                                                                                                                                                                                                                                                                                            | scaffold_7_mRNA_1386.1           | -                           | -                               |
| GF0031614 | 1                             | 0                        | 0                            | 0 LRR receptor-like kinase family protein (1)                                                             | protein phosphorylation [GO:0006468 biological_process] (1); protein kinase activity [GO:0004672 molecular_function] (1); ATP binding [GO:000524 molecular_function] (1); protein binding [GO:0005515 molecular_function] (1)                                                                                                                                           | Leucine-rich repeat, typical subtype [IPRO03591] (1); Leucine-rich repeat domain, L domain-like [IPRO26275] (1); Protein kinase-like domain [IPRO11009] (1); Protein kinase domain [IPRO00719] (1); Leucine-rich repeat [IPRO01611] (1); Leucine-rich repeat-containing N-terminal, plant-type [IPRO13210] (1); Protein kinase, ATP binding site [IPRO17441] (1); Serine/threonine-protein kinase, active site [IPRO08271] (1)                                                             | scaffold_7_mRNA_1384.1           | -                           | -                               |
| GF0031613 | 1                             | 0                        | 0                            | 0 SLG-Sc and SLA-Sc genes and Melnoh retrotransposon sequence (1)                                         | DNA integration [GO:0015074 biological_process] (1); nucleic acid binding [GO:0003676 molecular_function] (1)                                                                                                                                                                                                                                                           | Integrase, catalytic core [IPRO01584] (1); Reverse transcriptase, RNA-dependent DNA polymerase [IPRO3103] (1); Ribonuclease H-like domain [IPRO12337] (1); GAG-pre-integrase domain [IPRO25724] (1)                                                                                                                                                                                                                                                                                        | scaffold_7_mRNA_1379.1           | -                           | -                               |
| GF0031612 | 1                             | 0                        | 0                            | 0 Hypothetical protein (1)                                                                                |                                                                                                                                                                                                                                                                                                                                                                         | Reverse transcriptase, RNA-dependent DNA polymerase [IPRO3103] (1); Gag polypeptide of LTR copia-type [IPRO29472] (1)                                                                                                                                                                                                                                                                                                                                                                      | scaffold_7_mRNA_1376.1           | -                           | -                               |
| GF0031611 | 1                             | 0                        | 0                            | 0 Hypothetical protein (1)                                                                                |                                                                                                                                                                                                                                                                                                                                                                         |                                                                                                                                                                                                                                                                                                                                                                                                                                                                                            | scaffold_7_mRNA_1370.1           | -                           | -                               |
| GF0031610 | 1                             | 0                        | 0                            | 0 Cytokinin riboside 5'-monophosphate phosphoribohydrolase (1)                                            |                                                                                                                                                                                                                                                                                                                                                                         | LOG family [IPRO31100] (1); Cytokinin riboside 5'-monophosphate phosphoribohydrolase LOG [IPRO05269] (1)                                                                                                                                                                                                                                                                                                                                                                                   | scaffold_7_mRNA_1369.1           | -                           | -                               |
| GF0031609 | 1                             | 0                        | 0                            | 0 Cytokinin riboside 5'-monophosphate phosphoribohydrolase (1)                                            |                                                                                                                                                                                                                                                                                                                                                                         | LOG family [IPRO31100] (1)                                                                                                                                                                                                                                                                                                                                                                                                                                                                 | scaffold_7_mRNA_1366.1           | -                           | -                               |
| GF0031608 | 1                             | 0                        | 0                            | 0 Hypothetical protein (1)                                                                                |                                                                                                                                                                                                                                                                                                                                                                         |                                                                                                                                                                                                                                                                                                                                                                                                                                                                                            | scaffold_7_mRNA_1350.1           | -                           | -                               |
| GF0031607 | 1                             | 0                        | 0                            | 0 Hypothetical protein (1)                                                                                | nucleic acid binding [GO:0003676 molecular_function] (1); protein dimerization activity [GO:0046983 molecular_function] (1)                                                                                                                                                                                                                                             | Ribonuclease H-like domain [IPRO12337] (1); HAT, C-terminal dimerisation domain [IPRO8906] (1)                                                                                                                                                                                                                                                                                                                                                                                             | scaffold_7_mRNA_1349.1           | -                           | -                               |
| GF0031606 | 1                             | 0                        | 0                            | 0 Hypothetical protein (1)                                                                                |                                                                                                                                                                                                                                                                                                                                                                         |                                                                                                                                                                                                                                                                                                                                                                                                                                                                                            | scaffold_7_mRNA_1348.1           | -                           | -                               |
| GF0031605 | 1                             | 0                        | 0                            | 0 To encode a PR protein. Belongs to the 0 plant thionin family with the following members-, putative (1) |                                                                                                                                                                                                                                                                                                                                                                         |                                                                                                                                                                                                                                                                                                                                                                                                                                                                                            | scaffold_7_mRNA_1346.1           | -                           | -                               |
| GF0031604 | 1                             | 0                        | 0                            | 0 To encode a PR protein. Belongs to the 0 plant thionin family with the following members-, putative (1) |                                                                                                                                                                                                                                                                                                                                                                         |                                                                                                                                                                                                                                                                                                                                                                                                                                                                                            | scaffold_7_mRNA_1345.1           | -                           | -                               |
| GF0031603 | 1                             | 0                        | 0                            | 0 LRR receptor-like kinase family protein (1)                                                             | proteolysis [GO:0006508 biological_process] (1); protein kinase activity [GO:0004672 molecular_function] (1); protein phosphorylation [GO:0006468 biological_process] (1); ATP binding [GO:000524 molecular_function] (1); aspartic-type endopeptidase activity [GO:0004190 molecular_function] (1); protein binding [GO:0005515 molecular_function] (1)                | Protein kinase-like domain [IPRO11009] (1); Leucine-rich repeat domain, L domain-like [IPRO26275] (1); Leucine-rich repeat, typical subtype [IPRO03591] (1); Aspartic peptidase, active site [IPRO01969] (1); Leucine rich repeat 4 [IPRO25875] (1); Protein kinase domain [IPRO00719] (1); Leucine-rich repeat [IPRO01611] (1); Serine/threonine-protein kinase, active site [IPRO08271] (1); Protein kinase, ATP binding site [IPRO17441] (1); Aspartic peptidase domain [IPRO21109] (1) | scaffold_7_mRNA_1339.1           | -                           | -                               |
| GF0031602 | 1                             | 0                        | 0                            | 0 Hypothetical protein (1)                                                                                |                                                                                                                                                                                                                                                                                                                                                                         |                                                                                                                                                                                                                                                                                                                                                                                                                                                                                            | scaffold_7_mRNA_1335.1           | -                           | -                               |
| GF0031601 | 1                             | 0                        | 0                            | 0 DEAD-box ATP-dependent RNA helicase 1 (1)                                                               | nucleic acid binding [GO:0003676 molecular_function] (1); ATP binding [GO:000524 molecular_function] (1)                                                                                                                                                                                                                                                                | Helicase superfamily 1/2, ATP-binding domain [IPRO14001] (1); P-loop containing nucleoside triphosphate hydrolase [IPRO27417] (1); DEAD/DEAF box helicase domain [IPRO11545] (1)                                                                                                                                                                                                                                                                                                           | scaffold_7_mRNA_1324.1           | -                           | -                               |
| GF0031600 | 1                             | 0                        | 0                            | 0 Hypothetical protein (1)                                                                                |                                                                                                                                                                                                                                                                                                                                                                         |                                                                                                                                                                                                                                                                                                                                                                                                                                                                                            | scaffold_7_mRNA_1321.1           | -                           | -                               |
| GF0031599 | 1                             | 0                        | 0                            | 0 Hypothetical protein (1)                                                                                |                                                                                                                                                                                                                                                                                                                                                                         |                                                                                                                                                                                                                                                                                                                                                                                                                                                                                            | scaffold_7_mRNA_1320.1           | -                           | -                               |
| GF0031598 | 1                             | 0                        | 0                            | 0 Hypothetical protein (1)                                                                                | transferase activity, transferring acyl groups other than amino-acyl groups [GO:0016747 molecular_function] (1)                                                                                                                                                                                                                                                         | Transferase [IPRO03480] (1)                                                                                                                                                                                                                                                                                                                                                                                                                                                                | scaffold_7_mRNA_1318.1           | -                           | -                               |
| GF0031597 | 1                             | 0                        | 0                            | 0 Hypothetical protein (1)                                                                                |                                                                                                                                                                                                                                                                                                                                                                         |                                                                                                                                                                                                                                                                                                                                                                                                                                                                                            | scaffold_7_mRNA_1314.1           | -                           | -                               |
| GF0031596 | 1                             | 0                        | 0                            | 0 Pseudo response regulator (1)                                                                           | phosphorelay signal transduction system [GO:0000160 biological_process] (1)                                                                                                                                                                                                                                                                                             | CheY-like superfamily [IPRO11006] (1); Signal transduction response regulator, receiver domain [IPRO01789] (1)                                                                                                                                                                                                                                                                                                                                                                             | scaffold_7_mRNA_1311.1           | -                           | -                               |
| GF0031595 | 1                             | 0                        | 0                            | 0 Hypothetical protein (1)                                                                                |                                                                                                                                                                                                                                                                                                                                                                         |                                                                                                                                                                                                                                                                                                                                                                                                                                                                                            | scaffold_7_mRNA_1309.1           | -                           | -                               |
| GF0031594 | 1                             | 0                        | 0                            | 0 Hypothetical protein (1)                                                                                |                                                                                                                                                                                                                                                                                                                                                                         |                                                                                                                                                                                                                                                                                                                                                                                                                                                                                            | scaffold_7_mRNA_1301.1           | -                           | -                               |
| GF0031593 | 1                             | 0                        | 0                            | 0 Histidine kinase 1 (1)                                                                                  | transferase activity, transferring phosphorus-containing groups [GO:0016772 molecular_function] (1); phosphorylation [GO:0016310 biological_process] (1); signal transduction [GO:0007165 biological_process] (1); phosphorelay sensor kinase activity [GO:0000155 molecular_function] (1); phosphorelay signal transduction system [GO:0000160 biological_process] (1) | Histidine kinase-like ATPase, C-terminal domain [IPRO03594] (1); Signal transduction histidine kinase, dimerisation/phosphoacceptor domain [IPRO03661] (1); Signal transduction response regulator, receiver domain [IPRO01789] (1); Signal transduction histidine kinase-related protein, C-terminal [IPRO04355] (1); Histidine kinase domain [IPRO05467] (1)                                                                                                                             | scaffold_7_mRNA_1291.1           | -                           | -                               |
| GF0031592 | 1                             | 0                        | 0                            | 0 Hypothetical protein (1)                                                                                |                                                                                                                                                                                                                                                                                                                                                                         |                                                                                                                                                                                                                                                                                                                                                                                                                                                                                            | scaffold_7_mRNA_1289.1           | -                           | -                               |
| GF0031591 | 1                             | 0                        | 0                            | 0 Hypothetical protein (1)                                                                                |                                                                                                                                                                                                                                                                                                                                                                         | ZF-FILZ domain [IPRO07650] (1)                                                                                                                                                                                                                                                                                                                                                                                                                                                             | scaffold_7_mRNA_1281.1           | -                           | -                               |
| GF0031590 | 1                             | 0                        | 0                            | 0 Hypothetical protein (1)                                                                                |                                                                                                                                                                                                                                                                                                                                                                         |                                                                                                                                                                                                                                                                                                                                                                                                                                                                                            | scaffold_7_mRNA_1278.1           | -                           | -                               |
| GF0031589 | 1                             | 0                        | 0                            | 0 Hypothetical protein (1)                                                                                |                                                                                                                                                                                                                                                                                                                                                                         |                                                                                                                                                                                                                                                                                                                                                                                                                                                                                            | scaffold_7_mRNA_1277.1           | -                           | -                               |
| GF0031588 | 1                             | 0                        | 0                            | 0 Sulfite exporter TaulE family protein (1)                                                               | integral component of membrane [GO:0016021 cellular_component] (1)                                                                                                                                                                                                                                                                                                      | Transmembrane protein TaulE-like [IPRO02781] (1)                                                                                                                                                                                                                                                                                                                                                                                                                                           | scaffold_7_mRNA_1271.1           | -                           | -                               |

| ID        | Num. in <i>C. clementinae</i> | Num. in <i>C. uchiha</i> | Num. in <i>P. trifoliata</i> | Note                                                           | GO                                                                                                                                                                                                                                                                                                   | InterPro                                                                                                                                                                                                                                                                                                                                                                                                                                                                                                                             | Members in <i>C. clementinae</i> | Members in <i>C. uchiha</i> | Members in <i>P. trifoliata</i> |
|-----------|-------------------------------|--------------------------|------------------------------|----------------------------------------------------------------|------------------------------------------------------------------------------------------------------------------------------------------------------------------------------------------------------------------------------------------------------------------------------------------------------|--------------------------------------------------------------------------------------------------------------------------------------------------------------------------------------------------------------------------------------------------------------------------------------------------------------------------------------------------------------------------------------------------------------------------------------------------------------------------------------------------------------------------------------|----------------------------------|-----------------------------|---------------------------------|
| GF0031587 | 1                             | 0                        | 0                            | 0 Hypothetical protein (1)                                     |                                                                                                                                                                                                                                                                                                      |                                                                                                                                                                                                                                                                                                                                                                                                                                                                                                                                      | scaffold_7_mRNA_1270.1           | -                           | -                               |
| GF0031586 | 1                             | 0                        | 0                            | 0 Hypothetical protein (1)                                     |                                                                                                                                                                                                                                                                                                      |                                                                                                                                                                                                                                                                                                                                                                                                                                                                                                                                      | scaffold_7_mRNA_1268.1           | -                           | -                               |
| GF0031585 | 1                             | 0                        | 0                            | 0 Hypothetical protein (1)                                     |                                                                                                                                                                                                                                                                                                      |                                                                                                                                                                                                                                                                                                                                                                                                                                                                                                                                      | scaffold_7_mRNA_1267.1           | -                           | -                               |
| GF0031584 | 1                             | 0                        | 0                            | 0 Hypothetical protein (1)                                     |                                                                                                                                                                                                                                                                                                      |                                                                                                                                                                                                                                                                                                                                                                                                                                                                                                                                      | scaffold_7_mRNA_1243.1           | -                           | -                               |
| GF0031583 | 1                             | 0                        | 0                            | 0 Hypothetical protein (1)                                     |                                                                                                                                                                                                                                                                                                      | Thioredoxin-like fold [IPR012336] (1)                                                                                                                                                                                                                                                                                                                                                                                                                                                                                                | scaffold_7_mRNA_1236.1           | -                           | -                               |
| GF0031582 | 1                             | 0                        | 0                            | 0 Tonoplast intrinsic protein (1)                              | transporter activity [GO:0005215 molecular_function] (1); membrane [GO:0016020 cellular_component] (1); transport [GO:0006810 biological_process] (1)                                                                                                                                                | Major intrinsic protein [IPR000425] (1); Aquaporin transporter [IPR034204] (1); Major intrinsic protein, conserved site [IPR022357] (1); Aquaporin-like [IPR023271] (1)                                                                                                                                                                                                                                                                                                                                                              | scaffold_7_mRNA_1226.1           | -                           | -                               |
| GF0031581 | 1                             | 0                        | 0                            | 0 Hypothetical protein (1)                                     | nucleic acid binding [GO:0003676 molecular_function] (1); zinc ion binding [GO:0008270 molecular_function] (1)                                                                                                                                                                                       | Zinc knuckle CXCX4HX4C [IPR025836] (1); Zinc finger, CCHC-type [IPR018178] (1); Domain of unknown function DU4283 [IPR025558] (1)                                                                                                                                                                                                                                                                                                                                                                                                    | scaffold_7_mRNA_1212.1           | -                           | -                               |
| GF0031580 | 1                             | 0                        | 0                            | 0 Hypothetical protein (1)                                     |                                                                                                                                                                                                                                                                                                      | Endonuclease/exonuclease/phosphatase [IPR005135] (1)                                                                                                                                                                                                                                                                                                                                                                                                                                                                                 | scaffold_7_mRNA_1210.1           | -                           | -                               |
| GF0031579 | 1                             | 0                        | 0                            | 0 Histidine-containing phosphotransfer protein 4 (1)           | phosphorelay signal transduction system [GO:000160 biological_process] (1); signal transducer activity [GO:0004871 molecular_function] (1)                                                                                                                                                           | Signal transduction histidine kinase, phosphotransfer (Hpt) domain [IPR008207] (1)                                                                                                                                                                                                                                                                                                                                                                                                                                                   | scaffold_7_mRNA_1192.1           | -                           | -                               |
| GF0031578 | 1                             | 0                        | 0                            | 0 Hypothetical protein (1)                                     |                                                                                                                                                                                                                                                                                                      |                                                                                                                                                                                                                                                                                                                                                                                                                                                                                                                                      | scaffold_7_mRNA_1184.1           | -                           | -                               |
| GF0031577 | 1                             | 0                        | 0                            | 0 Hypothetical protein (1)                                     |                                                                                                                                                                                                                                                                                                      |                                                                                                                                                                                                                                                                                                                                                                                                                                                                                                                                      | scaffold_7_mRNA_1175.1           | -                           | -                               |
| GF0031576 | 1                             | 0                        | 0                            | 0 Hypothetical protein (1)                                     |                                                                                                                                                                                                                                                                                                      |                                                                                                                                                                                                                                                                                                                                                                                                                                                                                                                                      | scaffold_7_mRNA_1161.1           | -                           | -                               |
| GF0031575 | 1                             | 0                        | 0                            | 0 Hypothetical protein (1)                                     |                                                                                                                                                                                                                                                                                                      |                                                                                                                                                                                                                                                                                                                                                                                                                                                                                                                                      | scaffold_7_mRNA_1155.1           | -                           | -                               |
| GF0031574 | 1                             | 0                        | 0                            | 0 Hypothetical protein (1)                                     |                                                                                                                                                                                                                                                                                                      |                                                                                                                                                                                                                                                                                                                                                                                                                                                                                                                                      | scaffold_7_mRNA_1147.1           | -                           | -                               |
| GF0031573 | 1                             | 0                        | 0                            | 0 Hypothetical protein (1)                                     |                                                                                                                                                                                                                                                                                                      |                                                                                                                                                                                                                                                                                                                                                                                                                                                                                                                                      | scaffold_7_mRNA_1146.1           | -                           | -                               |
| GF0031572 | 1                             | 0                        | 0                            | 0 Hypothetical protein (1)                                     | protein kinase activity [GO:0004672 molecular_function] (1); protein phosphorylation [GO:0006468 biological_process] (1); ATP binding [GO:0005524 molecular_function] (1)                                                                                                                            | Protein kinase domain [IPR000719] (1); Protein kinase-like domain [IPR011009] (1); Leucine-rich repeat domain, L domain-like [IPR032675] (1)                                                                                                                                                                                                                                                                                                                                                                                         | scaffold_7_mRNA_1144.1           | -                           | -                               |
| GF0031571 | 1                             | 0                        | 0                            | 0 Hypothetical protein (1)                                     |                                                                                                                                                                                                                                                                                                      |                                                                                                                                                                                                                                                                                                                                                                                                                                                                                                                                      | scaffold_7_mRNA_1140.1           | -                           | -                               |
| GF0031570 | 1                             | 0                        | 0                            | 0 Isopentenyl transferase IPT2 (1)                             | tRNA processing [GO:0008033 biological_process] (1)                                                                                                                                                                                                                                                  | P-loop containing nucleoside triphosphate hydrolase [IPR027417] (1); tRNA dimethylallyltransferase [IPR018022] (1); Protein kinase-like domain [IPR011009] (1); Leucine-rich repeat domain, L domain-like [IPR032675] (1); Malactin-like carbohydrate-binding domain [IPR024788] (1); Protein kinase domain [IPR000719] (1); Protein kinase, active site [IPR017441] (1); Serine/threonine-protein kinase, active site [IPR008271] (1); Serine/threonine/tyrosine-protein kinase, catalytic domain [IPR001245] (1)                   | scaffold_7_mRNA_114.1            | -                           | -                               |
| GF0031569 | 1                             | 0                        | 0                            | 0 LRR receptor-like kinase plant (1)                           | ATP binding [GO:0005524 molecular_function] (1); protein phosphorylation [GO:0006468 biological_process] (1); protein kinase activity [GO:0004672 molecular_function] (1)                                                                                                                            | Protein kinase domain [IPR000719] (1); Malactin-like carbohydrate-binding domain [IPR024788] (1); Leucine-rich repeat domain, L domain-like [IPR032675] (1); Protein kinase-like domain [IPR011009] (1); Serine/threonine/tyrosine-protein kinase, catalytic domain [IPR001245] (1); Serine/threonine-protein kinase, active site [IPR017441] (1); Protein kinase, ATP binding site [IPR017441] (1); Leucine-rich repeat [IPR001611] (1)                                                                                             | scaffold_7_mRNA_1138.1           | -                           | -                               |
| GF0031568 | 1                             | 0                        | 0                            | 0 LRR receptor-like kinase plant (1)                           | ATP binding [GO:0005524 molecular_function] (1); protein phosphorylation [GO:0006468 biological_process] (1); protein kinase activity [GO:0004672 molecular_function] (1); protein binding [GO:0005515 molecular_function] (1)                                                                       | Protein kinase domain [IPR000719] (1); Malactin-like carbohydrate-binding domain [IPR024788] (1); Leucine-rich repeat domain, L domain-like [IPR032675] (1); Protein kinase-like domain [IPR011009] (1); Serine/threonine/tyrosine-protein kinase, catalytic domain [IPR001245] (1); Serine/threonine-protein kinase, active site [IPR017441] (1); Protein kinase, ATP binding site [IPR017441] (1); Leucine-rich repeat [IPR001611] (1)                                                                                             | scaffold_7_mRNA_1136.1           | -                           | -                               |
| GF0031567 | 1                             | 0                        | 0                            | 0 Hypothetical protein (1)                                     |                                                                                                                                                                                                                                                                                                      |                                                                                                                                                                                                                                                                                                                                                                                                                                                                                                                                      | scaffold_7_mRNA_1132.1           | -                           | -                               |
| GF0031566 | 1                             | 0                        | 0                            | 0 Plasma membrane ATPase (1)                                   | ATP biosynthetic process [GO:0006754 biological_process] (1); nucleotide binding [GO:0000166 molecular_function] (1); integral component of membrane [GO:0016021 cellular_component] (1); ATPase activity [GO:0016887 molecular_function] (1); metal ion binding [GO:0046872 molecular_function] (1) | P-type ATPase, subfamily HIA [IPR00534] (1); P-type ATPase, transmembrane domain [IPR023298] (1); P-type ATPase, cytoplasmic domain N [IPR023299] (1); P-type ATPase [IPR001277] (1); Cation-transporting P-type ATPase, N-terminal [IPR04014] (1); HAD-like domain [IPR023214] (1); P-type ATPase, A domain [IPR008250] (1)                                                                                                                                                                                                         | scaffold_7_mRNA_1130.1           | -                           | -                               |
| GF0031565 | 1                             | 0                        | 0                            | 0 Triacylglycerol lipase (1)                                   | lipid metabolic process [GO:0006629 biological_process] (1)                                                                                                                                                                                                                                          | Alpha/Beta hydrolase fold [IPR029058] (1); Fungal lipase-like domain [IPR02921] (1)                                                                                                                                                                                                                                                                                                                                                                                                                                                  | scaffold_7_mRNA_1128.1           | -                           | -                               |
| GF0031564 | 1                             | 0                        | 0                            | 0 Hypothetical protein (1)                                     |                                                                                                                                                                                                                                                                                                      |                                                                                                                                                                                                                                                                                                                                                                                                                                                                                                                                      | scaffold_7_mRNA_1121.1           | -                           | -                               |
| GF0031563 | 1                             | 0                        | 0                            | 0 1-phosphatidylinositol-3-phosphate 5-kinase FAK1 (1)         | ATP binding [GO:0005524 molecular_function] (1); metal ion binding [GO:0046872 molecular_function] (1); phosphatidylinositol phosphate kinase activity [GO:0016307 molecular_function] (1); phosphatidylinositol metabolic process [GO:0046488 biological_process] (1)                               | FYVE zinc finger [IPR000306] (1); Phosphatidylinositol-4-phosphate 5-kinase, core [IPR02498] (1); Zinc finger, FYVE-related [IPR017455] (1); Zinc finger, FYVE-PHD-type [IPR011011] (1); GroEL-like apical domain [IPR027409] (1); Zinc finger, RING-FYVE/PHD-type [IPR013083] (1); Chaperonin Cpn60/TCP-1 family [IPR002423] (1); GroEL-like equatorial domain [IPR027413] (1); Phosphatidylinositol-4-phosphate 5-kinase, N-terminal domain [IPR027484] (1); Phosphatidylinositol-4-phosphate 5-kinase, C-terminal [IPR027483] (1) | scaffold_7_mRNA_1111.1           | -                           | -                               |
| GF0031562 | 1                             | 0                        | 0                            | 0 Hypothetical protein (1)                                     |                                                                                                                                                                                                                                                                                                      |                                                                                                                                                                                                                                                                                                                                                                                                                                                                                                                                      | scaffold_7_mRNA_1099.1           | -                           | -                               |
| GF0031561 | 1                             | 0                        | 0                            | 0 Hypothetical protein (1)                                     |                                                                                                                                                                                                                                                                                                      |                                                                                                                                                                                                                                                                                                                                                                                                                                                                                                                                      | scaffold_7_mRNA_1095.1           | -                           | -                               |
| GF0031560 | 1                             | 0                        | 0                            | 0 Hypothetical protein (1)                                     |                                                                                                                                                                                                                                                                                                      |                                                                                                                                                                                                                                                                                                                                                                                                                                                                                                                                      | scaffold_7_mRNA_1093.1           | -                           | -                               |
| GF0031559 | 1                             | 0                        | 0                            | 0 (S)-2-hydroxy-acid oxidase (1)                               | catalytic activity [GO:0003824 molecular_function] (1); oxidoreductase activity [GO:0016491 molecular_function] (1); oxidation-reduction process [GO:0055114 biological_process] (1); FMN binding [GO:0010181 molecular_function] (1)                                                                | Alpha-hydroxy acid dehydrogenase, FMN-dependent [IPR012133] (1); Aldolase-type TIM barrel [IPR013785] (1); FMN-dependent dehydrogenase [IPR000262] (1)                                                                                                                                                                                                                                                                                                                                                                               | scaffold_7_mRNA_1073.1           | -                           | -                               |
| GF0031558 | 1                             | 0                        | 0                            | 0 Cytokinin riboside 5'-monophosphate phosphoribohydrolase (1) |                                                                                                                                                                                                                                                                                                      | LOG family [IPR031100] (1); Cytokinin riboside 5'-monophosphate phosphoribohydrolase LOG [IPR005269] (1)                                                                                                                                                                                                                                                                                                                                                                                                                             | scaffold_7_mRNA_1071.1           | -                           | -                               |
| GF0031557 | 1                             | 0                        | 0                            | 0 Hypothetical protein (1)                                     |                                                                                                                                                                                                                                                                                                      |                                                                                                                                                                                                                                                                                                                                                                                                                                                                                                                                      | scaffold_7_mRNA_1068.1           | -                           | -                               |
| GF0031556 | 1                             | 0                        | 0                            | 0 Hypothetical protein (1)                                     | 4 iron, 4 sulfur cluster binding [GO:001539 molecular_function] (1); lipase activity [GO:0016992 molecular_function] (1); lipase biosynthetic process [GO:0009107 biological_process] (1)                                                                                                            | Lipoyl synthase [IPR003698] (1)                                                                                                                                                                                                                                                                                                                                                                                                                                                                                                      | scaffold_7_mRNA_1063.1           | -                           | -                               |
| GF0031555 | 1                             | 0                        | 0                            | 0 Hypothetical protein (1)                                     |                                                                                                                                                                                                                                                                                                      |                                                                                                                                                                                                                                                                                                                                                                                                                                                                                                                                      | scaffold_7_mRNA_1061.1           | -                           | -                               |
| GF0031554 | 1                             | 0                        | 0                            | 0 Hypothetical protein (1)                                     |                                                                                                                                                                                                                                                                                                      |                                                                                                                                                                                                                                                                                                                                                                                                                                                                                                                                      | scaffold_7_mRNA_1060.1           | -                           | -                               |
| GF0031553 | 1                             | 0                        | 0                            | 0 Hypothetical protein (1)                                     |                                                                                                                                                                                                                                                                                                      |                                                                                                                                                                                                                                                                                                                                                                                                                                                                                                                                      | scaffold_7_mRNA_1059.1           | -                           | -                               |
| GF0031552 | 1                             | 0                        | 0                            | 0 Monosaccharide transport protein (1)                         |                                                                                                                                                                                                                                                                                                      |                                                                                                                                                                                                                                                                                                                                                                                                                                                                                                                                      | scaffold_7_mRNA_1058.1           | -                           | -                               |
| GF0031551 | 1                             | 0                        | 0                            | 0 Hypothetical protein (1)                                     |                                                                                                                                                                                                                                                                                                      |                                                                                                                                                                                                                                                                                                                                                                                                                                                                                                                                      | scaffold_7_mRNA_1057.1           | -                           | -                               |
| GF0031550 | 1                             | 0                        | 0                            | 0 Hypothetical protein (1)                                     |                                                                                                                                                                                                                                                                                                      |                                                                                                                                                                                                                                                                                                                                                                                                                                                                                                                                      | scaffold_7_mRNA_1056.1           | -                           | -                               |
| GF0031549 | 1                             | 0                        | 0                            | 0 Hypothetical protein (1)                                     | nucleic acid binding [GO:0003676 molecular_function] (1)                                                                                                                                                                                                                                             | Ribonuclease H-like domain [IPR012337] (1)                                                                                                                                                                                                                                                                                                                                                                                                                                                                                           | scaffold_7_mRNA_1054.1           | -                           | -                               |
| GF0031548 | 1                             | 0                        | 0                            | 0 Beta-ketoacyl-acyl-carrier-protein synthase II (1)           | metabolic process [GO:0008152 biological_process] (1); catalytic activity [GO:0003824 molecular_function] (1); transference activity, transferring acyl groups other than amino-acyl groups [GO:0016747 molecular_function] (1); fatty acid biosynthetic process [GO:0006633 biological_process] (1) | Polyketide synthase, beta-ketoacyl synthase domain [IPR020841] (1); Thiolase-like [IPR016609] (1); Beta-ketoacyl synthase, active site [IPR018201] (1); Beta-ketoacyl synthase, N-terminal [IPR014030] (1); 3-oxoacyl-acyl-carrier-protein synthase 2 [IPR017568] (1); Beta-ketoacyl synthase, C-terminal [IPR014031] (1)                                                                                                                                                                                                            | scaffold_7_mRNA_1049.1           | -                           | -                               |
| GF0031547 | 1                             | 0                        | 0                            | 0 Hypothetical protein (1)                                     |                                                                                                                                                                                                                                                                                                      | Leucine-rich repeat domain, L domain-like [IPR032675] (1)                                                                                                                                                                                                                                                                                                                                                                                                                                                                            | scaffold_7_mRNA_1048.1           | -                           | -                               |
| GF0031546 | 1                             | 0                        | 0                            | 0 Putative non-LTR retroelement reverse transcriptase (1)      | nucleic acid binding [GO:0003676 molecular_function] (1)                                                                                                                                                                                                                                             | Reverse transcriptase zinc-binding domain [IPR026960] (1); Ribonuclease H-like domain [IPR012337] (1); Reverse transcriptase domain [IPR00477] (1); Endonuclease/exonuclease/phosphatase [IPR005135] (1)                                                                                                                                                                                                                                                                                                                             | scaffold_7_mRNA_1046.1           | -                           | -                               |
| GF0031545 | 1                             | 0                        | 0                            | 0 Hypothetical protein (1)                                     |                                                                                                                                                                                                                                                                                                      |                                                                                                                                                                                                                                                                                                                                                                                                                                                                                                                                      | scaffold_7_mRNA_1032.1           | -                           | -                               |

| ID        | Num. in <i>C. clementiae</i> | Num. in <i>C. uchiha</i> | Num. in <i>P. trifoliata</i> | Note                                                           | GO                                                                                                                                                                                                                            | InterPro                                                                                                                                                                                                                                                                                                                                                                                                                       | Members in <i>C. clementiae</i> | Members in <i>C. uchiha</i> | Members in <i>P. trifoliata</i> |
|-----------|------------------------------|--------------------------|------------------------------|----------------------------------------------------------------|-------------------------------------------------------------------------------------------------------------------------------------------------------------------------------------------------------------------------------|--------------------------------------------------------------------------------------------------------------------------------------------------------------------------------------------------------------------------------------------------------------------------------------------------------------------------------------------------------------------------------------------------------------------------------|---------------------------------|-----------------------------|---------------------------------|
| GF0031544 | 1                            | 0                        | 0                            | 0 Subtilisin-like serine protease (1)                          | serine-type endopeptidase activity [GO:0004252 molecular_function] (1); proteolysis [GO:0006508 biological_process] (1)                                                                                                       | Peptidase S8, subtilisin, Ser-active site [IPRO23282] (1); Peptidase S8 propeptide/protease inhibitor 19 [IPRO10259] (1); Peptidase S8, subtilisin-related [IPRO15500] (1); Protease propeptides/proteases inhibitor 19 [IPRO09020] (1); Peptidase S8/S53 domain [IPRO00209] (1); PA domain [IPRO03137] (1); Cucumis-like catalytic domain [IPRO34197] (1)                                                                     | scaffold_7_mRNA_1015.1          | -                           | -                               |
| GF0031543 | 1                            | 0                        | 0                            | 0 Hypothetical protein (1)                                     |                                                                                                                                                                                                                               |                                                                                                                                                                                                                                                                                                                                                                                                                                | scaffold_7_mRNA_1012.1          | -                           | -                               |
| GF0031542 | 1                            | 0                        | 0                            | 0 Hypothetical protein (1)                                     |                                                                                                                                                                                                                               |                                                                                                                                                                                                                                                                                                                                                                                                                                | scaffold_7_mRNA_1011.1          | -                           | -                               |
| GF0031541 | 1                            | 0                        | 0                            | 0 Hypothetical protein (1)                                     |                                                                                                                                                                                                                               |                                                                                                                                                                                                                                                                                                                                                                                                                                | scaffold_7_mRNA_1010.1          | -                           | -                               |
| GF0031540 | 1                            | 0                        | 0                            | 0 Hypothetical protein (1)                                     |                                                                                                                                                                                                                               |                                                                                                                                                                                                                                                                                                                                                                                                                                | scaffold_7_mRNA_1006.1          | -                           | -                               |
| GF0031539 | 1                            | 0                        | 0                            | 0 Hypothetical protein (1)                                     |                                                                                                                                                                                                                               | Aspartic peptidase domain [IPRO21109] (1)                                                                                                                                                                                                                                                                                                                                                                                      | scaffold_7_mRNA_1001.1          | -                           | -                               |
| GF0031538 | 1                            | 0                        | 0                            | 0 Monosaccharide transport protein (1)                         |                                                                                                                                                                                                                               |                                                                                                                                                                                                                                                                                                                                                                                                                                | scaffold_6_mRNA_997.1           | -                           | -                               |
| GF0031537 | 1                            | 0                        | 0                            | 0 Hypothetical protein (1)                                     |                                                                                                                                                                                                                               |                                                                                                                                                                                                                                                                                                                                                                                                                                | scaffold_6_mRNA_994.1           | -                           | -                               |
| GF0031536 | 1                            | 0                        | 0                            | 0 Hypothetical protein (1)                                     |                                                                                                                                                                                                                               |                                                                                                                                                                                                                                                                                                                                                                                                                                | scaffold_6_mRNA_990.1           | -                           | -                               |
| GF0031535 | 1                            | 0                        | 0                            | 0 Cytokinin riboside 5'-monophosphate phosphoribohydrolase (1) |                                                                                                                                                                                                                               | LOG family [IPRO31100] (1); Cytokinin riboside 5'-monophosphate phosphoribohydrolase LOG [IPRO05269] (1)                                                                                                                                                                                                                                                                                                                       | scaffold_6_mRNA_989.1           | -                           | -                               |
| GF0031534 | 1                            | 0                        | 0                            | 0 Hypothetical protein (1)                                     |                                                                                                                                                                                                                               |                                                                                                                                                                                                                                                                                                                                                                                                                                | scaffold_6_mRNA_986.1           | -                           | -                               |
| GF0031533 | 1                            | 0                        | 0                            | 0 Hypothetical protein (1)                                     |                                                                                                                                                                                                                               |                                                                                                                                                                                                                                                                                                                                                                                                                                | scaffold_6_mRNA_984.1           | -                           | -                               |
| GF0031532 | 1                            | 0                        | 0                            | 0 Hypothetical protein (1)                                     |                                                                                                                                                                                                                               |                                                                                                                                                                                                                                                                                                                                                                                                                                | scaffold_6_mRNA_983.1           | -                           | -                               |
| GF0031531 | 1                            | 0                        | 0                            | 0 Cytokinin riboside 5'-monophosphate phosphoribohydrolase (1) |                                                                                                                                                                                                                               | LOG family [IPRO31100] (1); Cytokinin riboside 5'-monophosphate phosphoribohydrolase LOG [IPRO05269] (1)                                                                                                                                                                                                                                                                                                                       | scaffold_6_mRNA_980.1           | -                           | -                               |
| GF0031530 | 1                            | 0                        | 0                            | 0 LRR receptor-like kinase family protein (1)                  | ATP binding [GO:000524 molecular_function] (1); protein phosphorylation [GO:0006468 biological_process] (1); protein kinase activity [GO:0004672 molecular_function] (1)                                                      | Protein kinase domain [IPRO00719] (1); Leucine-rich repeat domain, L domain-like [IPRO32675] (1); Protein kinase-like domain [IPRO11009] (1); Leucine-rich repeat-containing N-terminal, plant-type [IPRO13210] (1); Serine/threonine-protein kinase, active site [IPRO08271] (1); Protein kinase, ATP binding site [IPRO17441] (1)                                                                                            | scaffold_6_mRNA_98.1            | -                           | -                               |
| GF0031529 | 1                            | 0                        | 0                            | 0 Hypothetical protein (1)                                     |                                                                                                                                                                                                                               |                                                                                                                                                                                                                                                                                                                                                                                                                                | scaffold_6_mRNA_978.1           | -                           | -                               |
| GF0031528 | 1                            | 0                        | 0                            | 0 Hypothetical protein (1)                                     | nucleic acid binding [GO:0003676 molecular_function] (1); DNA binding [GO:0003677 molecular_function] (1)                                                                                                                     | Zinc finger, BED-type [IPRO03656] (1); Zinc finger C2H2-type [IPRO13087] (1)                                                                                                                                                                                                                                                                                                                                                   | scaffold_6_mRNA_976.1           | -                           | -                               |
| GF0031527 | 1                            | 0                        | 0                            | 0 Hypothetical protein (1)                                     | protein dimerization activity [GO:0046983 molecular_function] (1); nucleic acid binding [GO:0003676 molecular_function] (1)                                                                                                   | Ribonuclease H-like domain [IPRO12337] (1); HAT, C-terminal dimerisation domain [IPRO08906] (1)                                                                                                                                                                                                                                                                                                                                | scaffold_6_mRNA_974.1           | -                           | -                               |
| GF0031526 | 1                            | 0                        | 0                            | 0 Hypothetical protein (1)                                     |                                                                                                                                                                                                                               |                                                                                                                                                                                                                                                                                                                                                                                                                                | scaffold_6_mRNA_967.1           | -                           | -                               |
| GF0031525 | 1                            | 0                        | 0                            | 0 Hypothetical protein (1)                                     | protein dimerization activity [GO:0046983 molecular_function] (1); nucleic acid binding [GO:0003676 molecular_function] (1)                                                                                                   | HAT, C-terminal dimerisation domain [IPRO08906] (1); Ribonuclease H-like domain [IPRO12337] (1)                                                                                                                                                                                                                                                                                                                                | scaffold_6_mRNA_966.1           | -                           | -                               |
| GF0031524 | 1                            | 0                        | 0                            | 0 Hypothetical protein (1)                                     |                                                                                                                                                                                                                               |                                                                                                                                                                                                                                                                                                                                                                                                                                | scaffold_6_mRNA_964.1           | -                           | -                               |
| GF0031523 | 1                            | 0                        | 0                            | 0 Hypothetical protein (1)                                     |                                                                                                                                                                                                                               | Domain of unknown function DUF1985 [IPRO15410] (1)                                                                                                                                                                                                                                                                                                                                                                             | scaffold_6_mRNA_962.1           | -                           | -                               |
| GF0031522 | 1                            | 0                        | 0                            | 0 Mutator-like transposase (1)                                 | zinc ion binding [GO:0008270 molecular_function] (1)                                                                                                                                                                          | Zinc finger, PMZ-type [IPRO06564] (1); MULE transposase domain [IPRO18289] (1); Transposase, Mu/DR, plant [IPRO04332] (1); Zinc finger, SWIM-type [IPRO07527] (1)                                                                                                                                                                                                                                                              | scaffold_6_mRNA_961.1           | -                           | -                               |
| GF0031521 | 1                            | 0                        | 0                            | 0 Hypothetical protein (1)                                     |                                                                                                                                                                                                                               | Anaeroplasma retrotransposon Orf1 [IPRO04312] (1)                                                                                                                                                                                                                                                                                                                                                                              | scaffold_6_mRNA_960.1           | -                           | -                               |
| GF0031520 | 1                            | 0                        | 0                            | 0 LRR receptor-like kinase family protein (1)                  | ATP binding [GO:000524 molecular_function] (1); protein kinase activity [GO:0004672 molecular_function] (1); protein phosphorylation [GO:0006468 biological_process] (1)                                                      | Protein kinase-like domain [IPRO11009] (1); Leucine-rich repeat domain, L domain-like [IPRO32675] (1); Protein kinase domain [IPRO00719] (1); Leucine-rich repeat-containing N-terminal, plant-type [IPRO13210] (1); Serine/threonine-protein kinase, active site [IPRO08271] (1)                                                                                                                                              | scaffold_6_mRNA_96.1            | -                           | -                               |
| GF0031519 | 1                            | 0                        | 0                            | 0 Hypothetical protein (1)                                     |                                                                                                                                                                                                                               |                                                                                                                                                                                                                                                                                                                                                                                                                                | scaffold_6_mRNA_959.1           | -                           | -                               |
| GF0031518 | 1                            | 0                        | 0                            | 0 Hypothetical protein (1)                                     |                                                                                                                                                                                                                               | Aspartic peptidase domain [IPRO21109] (1); Chromo domain [IPRO23780] (1); Chromo domain-like [IPRO16197] (1)                                                                                                                                                                                                                                                                                                                   | scaffold_6_mRNA_955.1           | -                           | -                               |
| GF0031517 | 1                            | 0                        | 0                            | 0 Hypothetical protein (1)                                     |                                                                                                                                                                                                                               |                                                                                                                                                                                                                                                                                                                                                                                                                                | scaffold_6_mRNA_951.1           | -                           | -                               |
| GF0031516 | 1                            | 0                        | 0                            | 0 Hypothetical protein (1)                                     |                                                                                                                                                                                                                               |                                                                                                                                                                                                                                                                                                                                                                                                                                | scaffold_6_mRNA_95.1            | -                           | -                               |
| GF0031515 | 1                            | 0                        | 0                            | 0 Hypothetical protein (1)                                     |                                                                                                                                                                                                                               |                                                                                                                                                                                                                                                                                                                                                                                                                                | scaffold_6_mRNA_946.1           | -                           | -                               |
| GF0031514 | 1                            | 0                        | 0                            | 0 Hypothetical protein (1)                                     |                                                                                                                                                                                                                               |                                                                                                                                                                                                                                                                                                                                                                                                                                | scaffold_6_mRNA_941.1           | -                           | -                               |
| GF0031513 | 1                            | 0                        | 0                            | 0 Hypothetical protein (1)                                     |                                                                                                                                                                                                                               |                                                                                                                                                                                                                                                                                                                                                                                                                                | scaffold_6_mRNA_94.1            | -                           | -                               |
| GF0031512 | 1                            | 0                        | 0                            | 0 Hypothetical protein (1)                                     |                                                                                                                                                                                                                               |                                                                                                                                                                                                                                                                                                                                                                                                                                | scaffold_6_mRNA_937.1           | -                           | -                               |
| GF0031511 | 1                            | 0                        | 0                            | 0 Hypothetical protein (1)                                     |                                                                                                                                                                                                                               |                                                                                                                                                                                                                                                                                                                                                                                                                                | scaffold_6_mRNA_932.1           | -                           | -                               |
| GF0031510 | 1                            | 0                        | 0                            | 0 Hypothetical protein (1)                                     | zinc ion binding [GO:0008270 molecular_function] (1)                                                                                                                                                                          | Zinc finger, SWIM-type [IPRO07527] (1); Zinc finger, PMZ-type [IPRO06564] (1)                                                                                                                                                                                                                                                                                                                                                  | scaffold_6_mRNA_929.1           | -                           | -                               |
| GF0031509 | 1                            | 0                        | 0                            | 0 Hypothetical protein (1)                                     |                                                                                                                                                                                                                               |                                                                                                                                                                                                                                                                                                                                                                                                                                | scaffold_6_mRNA_928.1           | -                           | -                               |
| GF0031508 | 1                            | 0                        | 0                            | 0 Hypothetical protein (1)                                     |                                                                                                                                                                                                                               |                                                                                                                                                                                                                                                                                                                                                                                                                                | scaffold_6_mRNA_920.1           | -                           | -                               |
| GF0031507 | 1                            | 0                        | 0                            | 0 Hypothetical protein (1)                                     |                                                                                                                                                                                                                               |                                                                                                                                                                                                                                                                                                                                                                                                                                | scaffold_6_mRNA_918.1           | -                           | -                               |
| GF0031506 | 1                            | 0                        | 0                            | 0 Hypothetical protein (1)                                     |                                                                                                                                                                                                                               |                                                                                                                                                                                                                                                                                                                                                                                                                                | scaffold_6_mRNA_911.1           | -                           | -                               |
| GF0031505 | 1                            | 0                        | 0                            | 0 Hypothetical protein (1)                                     |                                                                                                                                                                                                                               |                                                                                                                                                                                                                                                                                                                                                                                                                                | scaffold_6_mRNA_908.1           | -                           | -                               |
| GF0031504 | 1                            | 0                        | 0                            | 0 Hypothetical protein (1)                                     |                                                                                                                                                                                                                               |                                                                                                                                                                                                                                                                                                                                                                                                                                | scaffold_6_mRNA_907.1           | -                           | -                               |
| GF0031503 | 1                            | 0                        | 0                            | 0 Hypothetical protein (1)                                     |                                                                                                                                                                                                                               |                                                                                                                                                                                                                                                                                                                                                                                                                                | scaffold_6_mRNA_906.1           | -                           | -                               |
| GF0031502 | 1                            | 0                        | 0                            | 0 Hypothetical protein (1)                                     |                                                                                                                                                                                                                               |                                                                                                                                                                                                                                                                                                                                                                                                                                | scaffold_6_mRNA_900.1           | -                           | -                               |
| GF0031501 | 1                            | 0                        | 0                            | 0 Auxin efflux carrier component (1)                           | transmembrane transport [GO:005085 biological_process] (1); integral component of membrane [GO:0016021 cellular_component] (1)                                                                                                | Membrane transport protein [IPRO04776] (1)                                                                                                                                                                                                                                                                                                                                                                                     | scaffold_6_mRNA_891.1           | -                           | -                               |
| GF0031500 | 1                            | 0                        | 0                            | 0 Hypothetical protein (1)                                     |                                                                                                                                                                                                                               |                                                                                                                                                                                                                                                                                                                                                                                                                                | scaffold_6_mRNA_889.1           | -                           | -                               |
| GF0031499 | 1                            | 0                        | 0                            | 0 Hypothetical protein (1)                                     |                                                                                                                                                                                                                               |                                                                                                                                                                                                                                                                                                                                                                                                                                | scaffold_6_mRNA_888.1           | -                           | -                               |
| GF0031498 | 1                            | 0                        | 0                            | 0 Hypothetical protein (1)                                     |                                                                                                                                                                                                                               |                                                                                                                                                                                                                                                                                                                                                                                                                                | scaffold_6_mRNA_884.1           | -                           | -                               |
| GF0031497 | 1                            | 0                        | 0                            | 0 Hypothetical protein (1)                                     |                                                                                                                                                                                                                               |                                                                                                                                                                                                                                                                                                                                                                                                                                | scaffold_6_mRNA_876.1           | -                           | -                               |
| GF0031496 | 1                            | 0                        | 0                            | 0 DNA-damage-repair/tolerance protein DRT100 (1)               | protein binding [GO:0005515 molecular_function] (1)                                                                                                                                                                           | Leucine-rich repeat [IPRO01611] (1); Leucine-rich repeat-containing N-terminal, plant-type [IPRO13210] (1); Leucine-rich repeat domain, L domain-like [IPRO32675] (1)                                                                                                                                                                                                                                                          | scaffold_6_mRNA_875.1           | -                           | -                               |
| GF0031495 | 1                            | 0                        | 0                            | 0 Hypothetical protein (1)                                     |                                                                                                                                                                                                                               |                                                                                                                                                                                                                                                                                                                                                                                                                                | scaffold_6_mRNA_867.1           | -                           | -                               |
| GF0031494 | 1                            | 0                        | 0                            | 0 Hypothetical protein (1)                                     |                                                                                                                                                                                                                               | Reverse transcriptase zinc-binding domain [IPRO26960] (1)                                                                                                                                                                                                                                                                                                                                                                      | scaffold_6_mRNA_865.1           | -                           | -                               |
| GF0031493 | 1                            | 0                        | 0                            | 0 Hypothetical protein (1)                                     |                                                                                                                                                                                                                               |                                                                                                                                                                                                                                                                                                                                                                                                                                | scaffold_6_mRNA_863.1           | -                           | -                               |
| GF0031492 | 1                            | 0                        | 0                            | 0 Cytokinin riboside 5'-monophosphate phosphoribohydrolase (1) |                                                                                                                                                                                                                               | Cytokinin riboside 5'-monophosphate phosphoribohydrolase LOG [IPRO05269] (1); LOG family [IPRO31100] (1)                                                                                                                                                                                                                                                                                                                       | scaffold_6_mRNA_862.1           | -                           | -                               |
| GF0031491 | 1                            | 0                        | 0                            | 0 cDNA clone:002-112-G06, full insert sequence (1)             |                                                                                                                                                                                                                               |                                                                                                                                                                                                                                                                                                                                                                                                                                | scaffold_6_mRNA_861.1           | -                           | -                               |
| GF0031490 | 1                            | 0                        | 0                            | 0 LRR receptor-like kinase family protein (1)                  | protein binding [GO:0005515 molecular_function] (1); protein phosphorylation [GO:0006468 biological_process] (1); protein kinase activity [GO:0004672 molecular_function] (1); ATP binding [GO:000524 molecular_function] (1) | Protein kinase domain [IPRO00719] (1); Leucine-rich repeat, typical subtype [IPRO03591] (1); Leucine-rich repeat domain, L domain-like [IPRO32675] (1); Protein kinase-like domain [IPRO11009] (1); Protein kinase, ATP binding site [IPRO17441] (1); Serine/threonine-protein kinase, active site [IPRO08271] (1); Leucine-rich repeat-containing N-terminal, plant-type [IPRO13210] (1); Leucine-rich repeat [IPRO01611] (1) | scaffold_6_mRNA_86.1            | -                           | -                               |
| GF0031489 | 1                            | 0                        | 0                            | 0 Hypothetical protein (1)                                     |                                                                                                                                                                                                                               |                                                                                                                                                                                                                                                                                                                                                                                                                                | scaffold_6_mRNA_856.1           | -                           | -                               |
| GF0031488 | 1                            | 0                        | 0                            | 0 Hypothetical protein (1)                                     |                                                                                                                                                                                                                               |                                                                                                                                                                                                                                                                                                                                                                                                                                | scaffold_6_mRNA_855.1           | -                           | -                               |
| GF0031487 | 1                            | 0                        | 0                            | 0 Hypothetical protein (1)                                     | nucleic acid binding [GO:0003676 molecular_function] (1); DNA binding [GO:0003677 molecular_function] (1)                                                                                                                     | Zinc finger, BED-type [IPRO03656] (1); Zinc finger C2H2-type [IPRO13087] (1)                                                                                                                                                                                                                                                                                                                                                   | scaffold_6_mRNA_853.1           | -                           | -                               |
| GF0031486 | 1                            | 0                        | 0                            | 0 Hypothetical protein (1)                                     |                                                                                                                                                                                                                               |                                                                                                                                                                                                                                                                                                                                                                                                                                | scaffold_6_mRNA_850.1           | -                           | -                               |
| GF0031485 | 1                            | 0                        | 0                            | 0 Hypothetical protein (1)                                     |                                                                                                                                                                                                                               |                                                                                                                                                                                                                                                                                                                                                                                                                                | scaffold_6_mRNA_85.1            | -                           | -                               |
| GF0031484 | 1                            | 0                        | 0                            | 0 Hypothetical protein (1)                                     |                                                                                                                                                                                                                               | LOG family [IPRO31100] (1)                                                                                                                                                                                                                                                                                                                                                                                                     | scaffold_6_mRNA_849.1           | -                           | -                               |
| GF0031483 | 1                            | 0                        | 0                            | 0 Hypothetical protein (1)                                     |                                                                                                                                                                                                                               |                                                                                                                                                                                                                                                                                                                                                                                                                                | scaffold_6_mRNA_846.1           | -                           | -                               |
| GF0031482 | 1                            | 0                        | 0                            | 0 Hypothetical protein (1)                                     |                                                                                                                                                                                                                               |                                                                                                                                                                                                                                                                                                                                                                                                                                | scaffold_6_mRNA_845.1           | -                           | -                               |
| GF0031481 | 1                            | 0                        | 0                            | 0 Hypothetical protein (1)                                     |                                                                                                                                                                                                                               |                                                                                                                                                                                                                                                                                                                                                                                                                                | scaffold_6_mRNA_844.1           | -                           | -                               |
| GF0031480 | 1                            | 0                        | 0                            | 0 Hypothetical protein (1)                                     |                                                                                                                                                                                                                               |                                                                                                                                                                                                                                                                                                                                                                                                                                | scaffold_6_mRNA_839.1           | -                           | -                               |
| GF0031479 | 1                            | 0                        | 0                            | 0 Hypothetical protein (1)                                     |                                                                                                                                                                                                                               |                                                                                                                                                                                                                                                                                                                                                                                                                                | scaffold_6_mRNA_838.1           | -                           | -                               |

| ID        | Num. in <i>C. clementinae</i> | Num. in <i>C. uchiha</i> | Num. in <i>P. trifoliata</i> | Note                                                           | GO                                                                                                                                                                                                                                                                                                                                              | InterPro                                                                                                                                                                                                                        | Members in <i>C. clementinae</i> | Members in <i>C. uchiha</i> | Members in <i>P. trifoliata</i> |
|-----------|-------------------------------|--------------------------|------------------------------|----------------------------------------------------------------|-------------------------------------------------------------------------------------------------------------------------------------------------------------------------------------------------------------------------------------------------------------------------------------------------------------------------------------------------|---------------------------------------------------------------------------------------------------------------------------------------------------------------------------------------------------------------------------------|----------------------------------|-----------------------------|---------------------------------|
| GF0031478 | 1                             | 0                        | 0                            | 0 Hypothetical protein (1)                                     | structural constituent of ribosome [GO:0003735 molecular_function] (1); cysteine-type peptidase activity [GO:0005234 molecular_function] (1); intracellular [GO:0005622 cellular_component] (1); translation [GO:0006412 biological_process] (1); ribosome [GO:0005840 cellular_component] (1); proteolysis [GO:0006508 biological_process] (1) | Translation protein SH3-like domain [IPR008991] (1); Upl1 protease family, C-terminal catalytic domain [IPR003653] (1); Ribosomal protein L14e domain [IPR02794] (1); Ribosomal protein L2 domain 2 [IPR014722] (1)             | scaffold_6_mRNA_832.1            | -                           | -                               |
| GF0031477 | 1                             | 0                        | 0                            | 0 Hypothetical protein (1)                                     |                                                                                                                                                                                                                                                                                                                                                 |                                                                                                                                                                                                                                 | scaffold_6_mRNA_83.1             | -                           | -                               |
| GF0031476 | 1                             | 0                        | 0                            | 0 BED zinc finger/JAT family dimerization domain isoform 1 (1) | protein dimerization activity [GO:0046983 molecular_function] (1); nucleic acid binding [GO:0003676 molecular_function] (1); DNA binding [GO:0003677 molecular_function] (1)                                                                                                                                                                    | hAT-like transposase, RNase-H fold [IPR025525] (1); Ribonuclease H-like domain [IPR012337] (1); HAT, C-terminal dimerization domain [IPR008906] (1)                                                                             | scaffold_6_mRNA_829.1            | -                           | -                               |
| GF0031475 | 1                             | 0                        | 0                            | 0 Hypothetical protein (1)                                     |                                                                                                                                                                                                                                                                                                                                                 |                                                                                                                                                                                                                                 | scaffold_6_mRNA_828.1            | -                           | -                               |
| GF0031474 | 1                             | 0                        | 0                            | 0 Hypothetical protein (1)                                     |                                                                                                                                                                                                                                                                                                                                                 |                                                                                                                                                                                                                                 | scaffold_6_mRNA_826.1            | -                           | -                               |
| GF0031473 | 1                             | 0                        | 0                            | 0 Hypothetical protein (1)                                     |                                                                                                                                                                                                                                                                                                                                                 |                                                                                                                                                                                                                                 | scaffold_6_mRNA_824.1            | -                           | -                               |
| GF0031472 | 1                             | 0                        | 0                            | 0 Hypothetical protein (1)                                     |                                                                                                                                                                                                                                                                                                                                                 |                                                                                                                                                                                                                                 | scaffold_6_mRNA_823.1            | -                           | -                               |
| GF0031471 | 1                             | 0                        | 0                            | 0 Hypothetical protein (1)                                     |                                                                                                                                                                                                                                                                                                                                                 |                                                                                                                                                                                                                                 | scaffold_6_mRNA_821.1            | -                           | -                               |
| GF0031470 | 1                             | 0                        | 0                            | 0 Hypothetical protein (1)                                     |                                                                                                                                                                                                                                                                                                                                                 |                                                                                                                                                                                                                                 | scaffold_6_mRNA_820.1            | -                           | -                               |
| GF0031469 | 1                             | 0                        | 0                            | 0 Hypothetical protein (1)                                     |                                                                                                                                                                                                                                                                                                                                                 |                                                                                                                                                                                                                                 | scaffold_6_mRNA_82.1             | -                           | -                               |
| GF0031468 | 1                             | 0                        | 0                            | 0 Hypothetical protein (1)                                     |                                                                                                                                                                                                                                                                                                                                                 |                                                                                                                                                                                                                                 | scaffold_6_mRNA_818.1            | -                           | -                               |
| GF0031467 | 1                             | 0                        | 0                            | 0 Hypothetical protein (1)                                     |                                                                                                                                                                                                                                                                                                                                                 |                                                                                                                                                                                                                                 | scaffold_6_mRNA_813.1            | -                           | -                               |
| GF0031466 | 1                             | 0                        | 0                            | 0 Hypothetical protein (1)                                     |                                                                                                                                                                                                                                                                                                                                                 |                                                                                                                                                                                                                                 | scaffold_6_mRNA_812.1            | -                           | -                               |
| GF0031465 | 1                             | 0                        | 0                            | 0 Hypothetical protein (1)                                     | nucleic acid binding [GO:0003676 molecular_function] (1); zinc ion binding [GO:0008270 molecular_function] (1)                                                                                                                                                                                                                                  | Zinc finger, CCHC-type [IPR001878] (1)                                                                                                                                                                                          | scaffold_6_mRNA_811.1            | -                           | -                               |
| GF0031464 | 1                             | 0                        | 0                            | 0 Monosaccharide transport protein (1)                         |                                                                                                                                                                                                                                                                                                                                                 |                                                                                                                                                                                                                                 | scaffold_6_mRNA_81.1             | -                           | -                               |
| GF0031463 | 1                             | 0                        | 0                            | 0 Putative AC transposase (1)                                  | nucleic acid binding [GO:0003676 molecular_function] (1); protein dimerization activity [GO:0046983 molecular_function] (1)                                                                                                                                                                                                                     | HAT, C-terminal dimerization domain [IPR008906] (1); Ribonuclease H-like domain [IPR012337] (1)                                                                                                                                 | scaffold_6_mRNA_809.1            | -                           | -                               |
| GF0031462 | 1                             | 0                        | 0                            | 0 Hypothetical protein (1)                                     |                                                                                                                                                                                                                                                                                                                                                 |                                                                                                                                                                                                                                 | scaffold_6_mRNA_806.1            | -                           | -                               |
| GF0031461 | 1                             | 0                        | 0                            | 0 Hypothetical protein (1)                                     |                                                                                                                                                                                                                                                                                                                                                 |                                                                                                                                                                                                                                 | scaffold_6_mRNA_804.1            | -                           | -                               |
| GF0031460 | 1                             | 0                        | 0                            | 0 Hypothetical protein (1)                                     |                                                                                                                                                                                                                                                                                                                                                 |                                                                                                                                                                                                                                 | scaffold_6_mRNA_802.1            | -                           | -                               |
| GF0031459 | 1                             | 0                        | 0                            | 0 Hypothetical protein (1)                                     | zinc ion binding [GO:0008270 molecular_function] (1); nucleic acid binding [GO:0003676 molecular_function] (1)                                                                                                                                                                                                                                  | Eukaryotic translation initiation factor 3 subunit G, N-terminal [IPR024675] (1); Zinc finger, CCHC-type [IPR001878] (1)                                                                                                        | scaffold_6_mRNA_800.1            | -                           | -                               |
| GF0031458 | 1                             | 0                        | 0                            | 0 Hypothetical protein (1)                                     |                                                                                                                                                                                                                                                                                                                                                 |                                                                                                                                                                                                                                 | scaffold_6_mRNA_796.1            | -                           | -                               |
| GF0031457 | 1                             | 0                        | 0                            | 0 Hypothetical protein (1)                                     | nucleic acid binding [GO:0003676 molecular_function] (1); zinc ion binding [GO:0008270 molecular_function] (1)                                                                                                                                                                                                                                  | Zinc finger, CCHC-type [IPR001878] (1)                                                                                                                                                                                          | scaffold_6_mRNA_795.1            | -                           | -                               |
| GF0031456 | 1                             | 0                        | 0                            | 0 Hypothetical protein (1)                                     | protein phosphorylation [GO:0006468 biological_process] (1); protein kinase activity [GO:0004672 molecular_function] (1); ATP binding [GO:0005524 molecular_function] (1)                                                                                                                                                                       | Protein kinase domain [IPR000719] (1); Protein kinase-like domain [IPR011009] (1); Serine-threonine/tyrosine-protein kinase, catalytic domain [IPR001245] (1)                                                                   | scaffold_6_mRNA_793.1            | -                           | -                               |
| GF0031455 | 1                             | 0                        | 0                            | 0 Hypothetical protein (1)                                     |                                                                                                                                                                                                                                                                                                                                                 |                                                                                                                                                                                                                                 | scaffold_6_mRNA_787.1            | -                           | -                               |
| GF0031454 | 1                             | 0                        | 0                            | 0 Hypothetical protein (1)                                     |                                                                                                                                                                                                                                                                                                                                                 |                                                                                                                                                                                                                                 | scaffold_6_mRNA_785.1            | -                           | -                               |
| GF0031453 | 1                             | 0                        | 0                            | 0 Hypothetical protein (1)                                     |                                                                                                                                                                                                                                                                                                                                                 |                                                                                                                                                                                                                                 | scaffold_6_mRNA_780.1            | -                           | -                               |
| GF0031452 | 1                             | 0                        | 0                            | 0 Hypothetical protein (1)                                     |                                                                                                                                                                                                                                                                                                                                                 |                                                                                                                                                                                                                                 | scaffold_6_mRNA_779.1            | -                           | -                               |
| GF0031451 | 1                             | 0                        | 0                            | 0 Hypothetical protein (1)                                     |                                                                                                                                                                                                                                                                                                                                                 |                                                                                                                                                                                                                                 | scaffold_6_mRNA_778.1            | -                           | -                               |
| GF0031450 | 1                             | 0                        | 0                            | 0 Hypothetical protein (1)                                     |                                                                                                                                                                                                                                                                                                                                                 |                                                                                                                                                                                                                                 | scaffold_6_mRNA_777.1            | -                           | -                               |
| GF0031449 | 1                             | 0                        | 0                            | 0 Hypothetical protein (1)                                     |                                                                                                                                                                                                                                                                                                                                                 |                                                                                                                                                                                                                                 | scaffold_6_mRNA_775.1            | -                           | -                               |
| GF0031448 | 1                             | 0                        | 0                            | 0 Hypothetical protein (1)                                     | nucleic acid binding [GO:0003676 molecular_function] (1); zinc ion binding [GO:0008270 molecular_function] (1)                                                                                                                                                                                                                                  | Zinc finger, CCHC-type [IPR001878] (1)                                                                                                                                                                                          | scaffold_6_mRNA_768.1            | -                           | -                               |
| GF0031447 | 1                             | 0                        | 0                            | 0 Hypothetical protein (1)                                     |                                                                                                                                                                                                                                                                                                                                                 |                                                                                                                                                                                                                                 | scaffold_6_mRNA_767.1            | -                           | -                               |
| GF0031446 | 1                             | 0                        | 0                            | 0 Hypothetical protein (1)                                     |                                                                                                                                                                                                                                                                                                                                                 | Domain of unknown function DUF4283 [IPR025588] (1)                                                                                                                                                                              | scaffold_6_mRNA_766.1            | -                           | -                               |
| GF0031445 | 1                             | 0                        | 0                            | 0 Hypothetical protein (1)                                     |                                                                                                                                                                                                                                                                                                                                                 |                                                                                                                                                                                                                                 | scaffold_6_mRNA_765.1            | -                           | -                               |
| GF0031444 | 1                             | 0                        | 0                            | 0 Hypothetical protein (1)                                     |                                                                                                                                                                                                                                                                                                                                                 |                                                                                                                                                                                                                                 | scaffold_6_mRNA_763.1            | -                           | -                               |
| GF0031443 | 1                             | 0                        | 0                            | 0 Hypothetical protein (1)                                     |                                                                                                                                                                                                                                                                                                                                                 |                                                                                                                                                                                                                                 | scaffold_6_mRNA_762.1            | -                           | -                               |
| GF0031442 | 1                             | 0                        | 0                            | 0 Hypothetical protein (1)                                     |                                                                                                                                                                                                                                                                                                                                                 | Aspartic peptidase domain [IPR021109] (1)                                                                                                                                                                                       | scaffold_6_mRNA_751.1            | -                           | -                               |
| GF0031441 | 1                             | 0                        | 0                            | 0 Hypothetical protein (1)                                     | nucleic acid binding [GO:0003676 molecular_function] (1); zinc ion binding [GO:0008270 molecular_function] (1)                                                                                                                                                                                                                                  | Zinc finger, CCHC-type [IPR001878] (1)                                                                                                                                                                                          | scaffold_6_mRNA_748.1            | -                           | -                               |
| GF0031440 | 1                             | 0                        | 0                            | 0 Retrotransposon gag protein (1)                              |                                                                                                                                                                                                                                                                                                                                                 | Retrotransposon gag domain [IPR005162] (1)                                                                                                                                                                                      | scaffold_6_mRNA_742.1            | -                           | -                               |
| GF0031439 | 1                             | 0                        | 0                            | 0 Hypothetical protein (1)                                     | zinc ion binding [GO:0008270 molecular_function] (1); nucleic acid binding [GO:0003676 molecular_function] (1)                                                                                                                                                                                                                                  | Zinc finger, CCHC-type [IPR001878] (1)                                                                                                                                                                                          | scaffold_6_mRNA_739.1            | -                           | -                               |
| GF0031438 | 1                             | 0                        | 0                            | 0 Cytokinin riboside 5'-monophosphate phosphoribohydrolase (1) |                                                                                                                                                                                                                                                                                                                                                 | LOG family [IPR031100] (1)                                                                                                                                                                                                      | scaffold_6_mRNA_738.1            | -                           | -                               |
| GF0031437 | 1                             | 0                        | 0                            | 0 Hypothetical protein (1)                                     |                                                                                                                                                                                                                                                                                                                                                 |                                                                                                                                                                                                                                 | scaffold_6_mRNA_737.1            | -                           | -                               |
| GF0031436 | 1                             | 0                        | 0                            | 0 Hypothetical protein (1)                                     |                                                                                                                                                                                                                                                                                                                                                 |                                                                                                                                                                                                                                 | scaffold_6_mRNA_734.1            | -                           | -                               |
| GF0031435 | 1                             | 0                        | 0                            | 0 Neutral alpha-glucosidase (1)                                | hydrolase activity, hydrolyzing O-glycosyl compounds [GO:0004553 molecular_function] (1); carbohydrate metabolic process [GO:0005975 biological_process] (1); catalytic activity [GO:0003224 molecular_function] (1); protein binding [GO:0005515 molecular_function] (1); carbohydrate binding [GO:0030246 molecular_function] (1)             | Glycoside hydrolase family 31 [IPR000322] (1); Galactose mannosidase-like domain [IPR01013] (1); Domain of unknown function DUF5110 [IPR033403] (1); Glycoside hydrolase superfamily [IPR017853] (1); WW domain [IPR001202] (1) | scaffold_6_mRNA_730.1            | -                           | -                               |
| GF0031434 | 1                             | 0                        | 0                            | 0 Pentatricopeptide repeat-containing family protein (1)       |                                                                                                                                                                                                                                                                                                                                                 | Pentatricopeptide repeat [IPR002885] (1)                                                                                                                                                                                        | scaffold_6_mRNA_729.1            | -                           | -                               |
| GF0031433 | 1                             | 0                        | 0                            | 0 Cytokinin riboside 5'-monophosphate phosphoribohydrolase (1) |                                                                                                                                                                                                                                                                                                                                                 | LOG family [IPR031100] (1)                                                                                                                                                                                                      | scaffold_6_mRNA_719.1            | -                           | -                               |
| GF0031432 | 1                             | 0                        | 0                            | 0 Hypothetical protein (1)                                     |                                                                                                                                                                                                                                                                                                                                                 |                                                                                                                                                                                                                                 | scaffold_6_mRNA_718.1            | -                           | -                               |
| GF0031431 | 1                             | 0                        | 0                            | 0 Hypothetical protein (1)                                     |                                                                                                                                                                                                                                                                                                                                                 |                                                                                                                                                                                                                                 | scaffold_6_mRNA_717.1            | -                           | -                               |
| GF0031430 | 1                             | 0                        | 0                            | 0 Hypothetical protein (1)                                     |                                                                                                                                                                                                                                                                                                                                                 |                                                                                                                                                                                                                                 | scaffold_6_mRNA_714.1            | -                           | -                               |
| GF0031429 | 1                             | 0                        | 0                            | 0 Hypothetical protein (1)                                     | zinc ion binding [GO:0008270 molecular_function] (1); nucleic acid binding [GO:0003676 molecular_function] (1)                                                                                                                                                                                                                                  | Zinc finger, CCHC-type [IPR001878] (1)                                                                                                                                                                                          | scaffold_6_mRNA_713.1            | -                           | -                               |
| GF0031428 | 1                             | 0                        | 0                            | 0 Hypothetical protein (1)                                     |                                                                                                                                                                                                                                                                                                                                                 |                                                                                                                                                                                                                                 | scaffold_6_mRNA_711.1            | -                           | -                               |
| GF0031427 | 1                             | 0                        | 0                            | 0 Hypothetical protein (1)                                     |                                                                                                                                                                                                                                                                                                                                                 |                                                                                                                                                                                                                                 | scaffold_6_mRNA_709.1            | -                           | -                               |
| GF0031426 | 1                             | 0                        | 0                            | 0 UDP-glycosyltransferase 73CS (1)                             | transferase activity, transferring hexosyl groups [GO:0016758 molecular_function] (1); metabolic process [GO:0008152 biological_process] (1)                                                                                                                                                                                                    | UDP-glucuronosylUDP-glucosyltransferase [IPR002213] (1)                                                                                                                                                                         | scaffold_6_mRNA_708.1            | -                           | -                               |
| GF0031425 | 1                             | 0                        | 0                            | 0 Hypothetical protein (1)                                     |                                                                                                                                                                                                                                                                                                                                                 |                                                                                                                                                                                                                                 | scaffold_6_mRNA_702.1            | -                           | -                               |
| GF0031424 | 1                             | 0                        | 0                            | 0 Cytokinin riboside 5'-monophosphate phosphoribohydrolase (1) |                                                                                                                                                                                                                                                                                                                                                 | LOG family [IPR031100] (1)                                                                                                                                                                                                      | scaffold_6_mRNA_701.1            | -                           | -                               |
| GF0031423 | 1                             | 0                        | 0                            | 0 Hypothetical protein (1)                                     |                                                                                                                                                                                                                                                                                                                                                 |                                                                                                                                                                                                                                 | scaffold_6_mRNA_700.1            | -                           | -                               |
| GF0031422 | 1                             | 0                        | 0                            | 0 Hypothetical protein (1)                                     |                                                                                                                                                                                                                                                                                                                                                 |                                                                                                                                                                                                                                 | scaffold_6_mRNA_695.1            | -                           | -                               |
| GF0031421 | 1                             | 0                        | 0                            | 0 UDP-glycosyltransferase 73D1 (1)                             | transferase activity, transferring hexosyl groups [GO:0016758 molecular_function] (1); metabolic process [GO:0008152 biological_process] (1)                                                                                                                                                                                                    | UDP-glucuronosylUDP-glucosyltransferase [IPR002213] (1)                                                                                                                                                                         | scaffold_6_mRNA_694.1            | -                           | -                               |
| GF0031420 | 1                             | 0                        | 0                            | 0 Hypothetical protein (1)                                     | nucleic acid binding [GO:0003676 molecular_function] (1); protein dimerization activity [GO:0046983 molecular_function] (1)                                                                                                                                                                                                                     | HAT, C-terminal dimerization domain [IPR008906] (1); Ribonuclease H-like domain [IPR012337] (1)                                                                                                                                 | scaffold_6_mRNA_690.1            | -                           | -                               |
| GF0031419 | 1                             | 0                        | 0                            | 0 BED zinc finger/JAT family dimerization domain (1)           | nucleic acid binding [GO:0003676 molecular_function] (1); DNA binding [GO:0003677 molecular_function] (1)                                                                                                                                                                                                                                       | Zinc finger, C2H2-type [IPR013087] (1); Ribonuclease H-like domain [IPR012337] (1); Zinc finger, BED-type [IPR003656] (1)                                                                                                       | scaffold_6_mRNA_689.1            | -                           | -                               |
| GF0031418 | 1                             | 0                        | 0                            | 0 Hypothetical protein (1)                                     |                                                                                                                                                                                                                                                                                                                                                 |                                                                                                                                                                                                                                 | scaffold_6_mRNA_688.1            | -                           | -                               |
| GF0031417 | 1                             | 0                        | 0                            | 0 Hypothetical protein (1)                                     |                                                                                                                                                                                                                                                                                                                                                 |                                                                                                                                                                                                                                 | scaffold_6_mRNA_686.1            | -                           | -                               |
| GF0031416 | 1                             | 0                        | 0                            | 0 Cytokinin riboside 5'-monophosphate phosphoribohydrolase (1) |                                                                                                                                                                                                                                                                                                                                                 | LOG family [IPR031100] (1)                                                                                                                                                                                                      | scaffold_6_mRNA_685.1            | -                           | -                               |
| GF0031415 | 1                             | 0                        | 0                            | 0 Hypothetical protein (1)                                     |                                                                                                                                                                                                                                                                                                                                                 |                                                                                                                                                                                                                                 | scaffold_6_mRNA_684.1            | -                           | -                               |
| GF0031414 | 1                             | 0                        | 0                            | 0 Hypothetical protein (1)                                     |                                                                                                                                                                                                                                                                                                                                                 |                                                                                                                                                                                                                                 | scaffold_6_mRNA_683.1            | -                           | -                               |
| GF0031413 | 1                             | 0                        | 0                            | 0 Hypothetical protein (1)                                     |                                                                                                                                                                                                                                                                                                                                                 |                                                                                                                                                                                                                                 | scaffold_6_mRNA_681.1            | -                           | -                               |
| GF0031412 | 1                             | 0                        | 0                            | 0 Hypothetical protein (1)                                     |                                                                                                                                                                                                                                                                                                                                                 | Retrotransposon gag domain [IPR005162] (1)                                                                                                                                                                                      | scaffold_6_mRNA_677.1            | -                           | -                               |
| GF0031411 | 1                             | 0                        | 0                            | 0 Hypothetical protein (1)                                     |                                                                                                                                                                                                                                                                                                                                                 | Reverse transcriptase, RNA-dependent DNA polymerase [IPR013103] (1)                                                                                                                                                             | scaffold_6_mRNA_676.1            | -                           | -                               |
| GF0031410 | 1                             | 0                        | 0                            | 0 Hypothetical protein (1)                                     |                                                                                                                                                                                                                                                                                                                                                 |                                                                                                                                                                                                                                 | scaffold_6_mRNA_674.1            | -                           | -                               |
| GF0031409 | 1                             | 0                        | 0                            | 0 Hypothetical protein (1)                                     |                                                                                                                                                                                                                                                                                                                                                 |                                                                                                                                                                                                                                 | scaffold_6_mRNA_673.1            | -                           | -                               |

| ID        | Num. in <i>C. clementiae</i> | Num. in <i>C. uchiha</i> | Num. in <i>P. trifoliata</i> | Note                                                                   | GO                                                                                                                                                                                                                                        | InterPro                                                                                                                                                                                                           | Members in <i>C. clementiae</i> | Members in <i>C. uchiha</i> | Members in <i>P. trifoliata</i> |
|-----------|------------------------------|--------------------------|------------------------------|------------------------------------------------------------------------|-------------------------------------------------------------------------------------------------------------------------------------------------------------------------------------------------------------------------------------------|--------------------------------------------------------------------------------------------------------------------------------------------------------------------------------------------------------------------|---------------------------------|-----------------------------|---------------------------------|
| GF0031408 | 1                            | 0                        | 0                            | 0 Hypothetical protein (1)                                             | nucleic acid binding [GO:0003676 molecular_function] (1); DNA integration [GO:0015074 biological_process] (1)                                                                                                                             | Ribonuclease H-like domain [IPRO12337] (1); Integrase, catalytic core [IPRO01584] (1)                                                                                                                              | scaffold_6_mRNA_670.1           | -                           | -                               |
| GF0031407 | 1                            | 0                        | 0                            | 0 Hypothetical protein (1)                                             |                                                                                                                                                                                                                                           |                                                                                                                                                                                                                    | scaffold_6_mRNA_664.1           | -                           | -                               |
| GF0031406 | 1                            | 0                        | 0                            | 0 Cytokinin riboside 5'-monophosphate phosphoribohydrolase (1)         |                                                                                                                                                                                                                                           | LOG family [IPRO31100] (1)                                                                                                                                                                                         | scaffold_6_mRNA_662.1           | -                           | -                               |
| GF0031405 | 1                            | 0                        | 0                            | 0 Hypothetical protein (1)                                             |                                                                                                                                                                                                                                           |                                                                                                                                                                                                                    | scaffold_6_mRNA_661.1           | -                           | -                               |
| GF0031404 | 1                            | 0                        | 0                            | 0 RAB GTPase-like protein A5B (1)                                      | GTPase activity [GO:0003924 molecular_function] (1); GTP binding [GO:0005525 molecular_function] (1)                                                                                                                                      | Small GTP-binding protein domain [IPRO05225] (1); P-loop containing nucleoside triphosphate hydrolase [IPRO27417] (1); Small GTPase superfamily [IPRO01806] (1)                                                    | scaffold_6_mRNA_656.1           | -                           | -                               |
| GF0031403 | 1                            | 0                        | 0                            | 0 Hypothetical protein (1)                                             |                                                                                                                                                                                                                                           |                                                                                                                                                                                                                    | scaffold_6_mRNA_650.1           | -                           | -                               |
| GF0031402 | 1                            | 0                        | 0                            | 0 Hypothetical protein (1)                                             |                                                                                                                                                                                                                                           |                                                                                                                                                                                                                    | scaffold_6_mRNA_649.1           | -                           | -                               |
| GF0031401 | 1                            | 0                        | 0                            | 0 Hypothetical protein (1)                                             | zinc ion binding [GO:0008270 molecular_function] (1); nucleic acid binding [GO:0003676 molecular_function] (1)                                                                                                                            | Zinc finger, CCHC-type [IPRO01878] (1)                                                                                                                                                                             | scaffold_6_mRNA_648.1           | -                           | -                               |
| GF0031400 | 1                            | 0                        | 0                            | 0 Cytokinin riboside 5'-monophosphate phosphoribohydrolase (1)         |                                                                                                                                                                                                                                           |                                                                                                                                                                                                                    | scaffold_6_mRNA_646.1           | -                           | -                               |
| GF0031399 | 1                            | 0                        | 0                            | 0 Integrase (1)                                                        |                                                                                                                                                                                                                                           | Aspartic peptidase domain [IPRO21109] (1)                                                                                                                                                                          | scaffold_6_mRNA_645.1           | -                           | -                               |
| GF0031398 | 1                            | 0                        | 0                            | 0 Hypothetical protein (1)                                             |                                                                                                                                                                                                                                           | Viral movement protein [IPRO28919] (1)                                                                                                                                                                             | scaffold_6_mRNA_644.1           | -                           | -                               |
| GF0031397 | 1                            | 0                        | 0                            | 0 Hypothetical protein (1)                                             |                                                                                                                                                                                                                                           |                                                                                                                                                                                                                    | scaffold_6_mRNA_643.1           | -                           | -                               |
| GF0031396 | 1                            | 0                        | 0                            | 0 Hypothetical protein (1)                                             |                                                                                                                                                                                                                                           |                                                                                                                                                                                                                    | scaffold_6_mRNA_642.1           | -                           | -                               |
| GF0031395 | 1                            | 0                        | 0                            | 0 Hypothetical protein (1)                                             |                                                                                                                                                                                                                                           | Viral movement protein [IPRO28919] (1)                                                                                                                                                                             | scaffold_6_mRNA_641.1           | -                           | -                               |
| GF0031394 | 1                            | 0                        | 0                            | 0 Hypothetical protein (1)                                             |                                                                                                                                                                                                                                           |                                                                                                                                                                                                                    | scaffold_6_mRNA_639.1           | -                           | -                               |
| GF0031393 | 1                            | 0                        | 0                            | 0 Hypothetical protein (1)                                             | nucleic acid binding [GO:0003676 molecular_function] (1); DNA integration [GO:0015074 biological_process] (1)                                                                                                                             | Integrase, catalytic core [IPRO01584] (1); Ribonuclease H-like domain [IPRO12337] (1); GAG-spec-integrase domain [IPRO25724] (1)                                                                                   | scaffold_6_mRNA_638.1           | -                           | -                               |
| GF0031392 | 1                            | 0                        | 0                            | 0 Hypothetical protein (1)                                             | proteolysis [GO:0006508 biological_process] (1); nucleic acid binding [GO:0003676 molecular_function] (1); aspartic-type endopeptidase activity [GO:0004190 molecular_function] (1); zinc ion binding [GO:0008270 molecular_function] (1) | Zinc finger, CCHC-type [IPRO01878] (1); Aspartic peptidase domain [IPRO21109] (1); Peptidase, AZA, retrovirus, catalytic [IPRO1995] (1); Reverse transcriptase domain [IPRO00477] (1); Retropepsins [IPRO1806] (1) | scaffold_6_mRNA_636.1           | -                           | -                               |
| GF0031391 | 1                            | 0                        | 0                            | 0 Hypothetical protein (1)                                             |                                                                                                                                                                                                                                           | Paraneoplastic antigen Ma [IPRO26523] (1); Reverse transcriptase domain [IPRO00477] (1)                                                                                                                            | scaffold_6_mRNA_632.1           | -                           | -                               |
| GF0031390 | 1                            | 0                        | 0                            | 0 Hypothetical protein (1)                                             |                                                                                                                                                                                                                                           | Aspartic peptidase domain [IPRO21109] (1)                                                                                                                                                                          | scaffold_6_mRNA_629.1           | -                           | -                               |
| GF0031389 | 1                            | 0                        | 0                            | 0 Hypothetical protein (1)                                             |                                                                                                                                                                                                                                           |                                                                                                                                                                                                                    | scaffold_6_mRNA_628.1           | -                           | -                               |
| GF0031388 | 1                            | 0                        | 0                            | 0 Hypothetical protein (1)                                             |                                                                                                                                                                                                                                           | LOG family [IPRO31100] (1)                                                                                                                                                                                         | scaffold_6_mRNA_627.1           | -                           | -                               |
| GF0031387 | 1                            | 0                        | 0                            | 0 Hypothetical protein (1)                                             |                                                                                                                                                                                                                                           |                                                                                                                                                                                                                    | scaffold_6_mRNA_626.1           | -                           | -                               |
| GF0031386 | 1                            | 0                        | 0                            | 0 Hypothetical protein (1)                                             |                                                                                                                                                                                                                                           |                                                                                                                                                                                                                    | scaffold_6_mRNA_625.1           | -                           | -                               |
| GF0031385 | 1                            | 0                        | 0                            | 0 Hypothetical protein (1)                                             | nucleic acid binding [GO:0003676 molecular_function] (1); protein dimerization activity [GO:0046983 molecular_function] (1)                                                                                                               | HAT, C-terminal dimerisation domain [IPRO08906] (1); Domain of unknown function DUF4219 [IPRO25314] (1); Ribonuclease H-like domain [IPRO12337] (1)                                                                | scaffold_6_mRNA_624.1           | -                           | -                               |
| GF0031384 | 1                            | 0                        | 0                            | 0 Hypothetical protein (1)                                             |                                                                                                                                                                                                                                           |                                                                                                                                                                                                                    | scaffold_6_mRNA_623.1           | -                           | -                               |
| GF0031383 | 1                            | 0                        | 0                            | 0 Hypothetical protein (1)                                             | nucleic acid binding [GO:0003676 molecular_function] (1); zinc ion binding [GO:0008270 molecular_function] (1)                                                                                                                            | Zinc finger, CCHC-type [IPRO01878] (1)                                                                                                                                                                             | scaffold_6_mRNA_622.1           | -                           | -                               |
| GF0031382 | 1                            | 0                        | 0                            | 0 Hypothetical protein (1)                                             |                                                                                                                                                                                                                                           | Viral movement protein [IPRO28919] (1)                                                                                                                                                                             | scaffold_6_mRNA_621.1           | -                           | -                               |
| GF0031381 | 1                            | 0                        | 0                            | 0 Hypothetical protein (1)                                             |                                                                                                                                                                                                                                           |                                                                                                                                                                                                                    | scaffold_6_mRNA_62.1            | -                           | -                               |
| GF0031380 | 1                            | 0                        | 0                            | 0 Cytokinin riboside 5'-monophosphate phosphoribohydrolase (1)         |                                                                                                                                                                                                                                           | LOG family [IPRO31100] (1); Cytokinin riboside 5'-monophosphate phosphoribohydrolase LOG [IPRO05269] (1)                                                                                                           | scaffold_6_mRNA_619.1           | -                           | -                               |
| GF0031379 | 1                            | 0                        | 0                            | 0 Hypothetical protein (1)                                             | regulation of transcription, DNA-templated [GO:0006355 biological_process] (1); nucleic acid binding [GO:0003676 molecular_function] (1)                                                                                                  | Carfavirus nucleic acid-binding protein [IPRO02568] (1)                                                                                                                                                            | scaffold_6_mRNA_618.1           | -                           | -                               |
| GF0031378 | 1                            | 0                        | 0                            | 0 Cytokinin riboside 5'-monophosphate phosphoribohydrolase (1)         |                                                                                                                                                                                                                                           |                                                                                                                                                                                                                    | scaffold_6_mRNA_616.1           | -                           | -                               |
| GF0031377 | 1                            | 0                        | 0                            | 0 Hypothetical protein (1)                                             |                                                                                                                                                                                                                                           |                                                                                                                                                                                                                    | scaffold_6_mRNA_615.1           | -                           | -                               |
| GF0031376 | 1                            | 0                        | 0                            | 0 Cytokinin riboside 5'-monophosphate phosphoribohydrolase (1)         |                                                                                                                                                                                                                                           | LOG family [IPRO31100] (1)                                                                                                                                                                                         | scaffold_6_mRNA_614.1           | -                           | -                               |
| GF0031375 | 1                            | 0                        | 0                            | 0 Hypothetical protein (1)                                             |                                                                                                                                                                                                                                           |                                                                                                                                                                                                                    | scaffold_6_mRNA_613.1           | -                           | -                               |
| GF0031374 | 1                            | 0                        | 0                            | 0 Hypothetical protein (1)                                             |                                                                                                                                                                                                                                           |                                                                                                                                                                                                                    | scaffold_6_mRNA_612.1           | -                           | -                               |
| GF0031373 | 1                            | 0                        | 0                            | 0 Hypothetical protein (1)                                             |                                                                                                                                                                                                                                           |                                                                                                                                                                                                                    | scaffold_6_mRNA_610.1           | -                           | -                               |
| GF0031372 | 1                            | 0                        | 0                            | 0 Cytokinin riboside 5'-monophosphate phosphoribohydrolase (1)         |                                                                                                                                                                                                                                           | LOG family [IPRO31100] (1)                                                                                                                                                                                         | scaffold_6_mRNA_609.1           | -                           | -                               |
| GF0031371 | 1                            | 0                        | 0                            | 0 Hypothetical protein (1)                                             |                                                                                                                                                                                                                                           |                                                                                                                                                                                                                    | scaffold_6_mRNA_607.1           | -                           | -                               |
| GF0031370 | 1                            | 0                        | 0                            | 0 Cytokinin riboside 5'-monophosphate phosphoribohydrolase (1)         |                                                                                                                                                                                                                                           | LOG family [IPRO31100] (1)                                                                                                                                                                                         | scaffold_6_mRNA_603.1           | -                           | -                               |
| GF0031369 | 1                            | 0                        | 0                            | 0 Hypothetical protein (1)                                             |                                                                                                                                                                                                                                           | Reverse transcriptase domain [IPRO00477] (1)                                                                                                                                                                       | scaffold_6_mRNA_602.1           | -                           | -                               |
| GF0031368 | 1                            | 0                        | 0                            | 0 Hypothetical protein (1)                                             |                                                                                                                                                                                                                                           |                                                                                                                                                                                                                    | scaffold_6_mRNA_601.1           | -                           | -                               |
| GF0031367 | 1                            | 0                        | 0                            | 0 Cytokinin riboside 5'-monophosphate phosphoribohydrolase (1)         |                                                                                                                                                                                                                                           | Cytokinin riboside 5'-monophosphate phosphoribohydrolase LOG [IPRO05269] (1); LOG family [IPRO31100] (1)                                                                                                           | scaffold_6_mRNA_600.1           | -                           | -                               |
| GF0031366 | 1                            | 0                        | 0                            | 0 Retrotransposon protein, putative, Ty3-gypsy subclass, expressed (1) |                                                                                                                                                                                                                                           | Reverse transcriptase domain [IPRO00477] (1); Aspartic peptidase domain [IPRO21109] (1)                                                                                                                            | scaffold_6_mRNA_60.1            | -                           | -                               |
| GF0031365 | 1                            | 0                        | 0                            | 0 Hypothetical protein (1)                                             |                                                                                                                                                                                                                                           |                                                                                                                                                                                                                    | scaffold_6_mRNA_598.1           | -                           | -                               |
| GF0031364 | 1                            | 0                        | 0                            | 0 Hypothetical protein (1)                                             |                                                                                                                                                                                                                                           |                                                                                                                                                                                                                    | scaffold_6_mRNA_596.1           | -                           | -                               |
| GF0031363 | 1                            | 0                        | 0                            | 0 Hypothetical protein (1)                                             |                                                                                                                                                                                                                                           |                                                                                                                                                                                                                    | scaffold_6_mRNA_592.1           | -                           | -                               |
| GF0031362 | 1                            | 0                        | 0                            | 0 Hypothetical protein (1)                                             | nucleic acid binding [GO:0003676 molecular_function] (1); zinc ion binding [GO:0008270 molecular_function] (1)                                                                                                                            | Zinc finger, CCHC-type [IPRO01878] (1)                                                                                                                                                                             | scaffold_6_mRNA_591.1           | -                           | -                               |
| GF0031361 | 1                            | 0                        | 0                            | 0 Hypothetical protein (1)                                             |                                                                                                                                                                                                                                           |                                                                                                                                                                                                                    | scaffold_6_mRNA_589.1           | -                           | -                               |
| GF0031360 | 1                            | 0                        | 0                            | 0 Hypothetical protein (1)                                             |                                                                                                                                                                                                                                           |                                                                                                                                                                                                                    | scaffold_6_mRNA_588.1           | -                           | -                               |
| GF0031359 | 1                            | 0                        | 0                            | 0 Cytokinin riboside 5'-monophosphate phosphoribohydrolase (1)         |                                                                                                                                                                                                                                           | LOG family [IPRO31100] (1)                                                                                                                                                                                         | scaffold_6_mRNA_587.1           | -                           | -                               |
| GF0031358 | 1                            | 0                        | 0                            | 0 Hypothetical protein (1)                                             | proteolysis [GO:0006508 biological_process] (1); serine-type endopeptidase activity [GO:0004252 molecular_function] (1)                                                                                                                   | Viral movement protein [IPRO28919] (1); Trichovirus movement protein [IPRO01815] (1)                                                                                                                               | scaffold_6_mRNA_584.1           | -                           | -                               |
| GF0031357 | 1                            | 0                        | 0                            | 0 Hypothetical protein (1)                                             |                                                                                                                                                                                                                                           |                                                                                                                                                                                                                    | scaffold_6_mRNA_583.1           | -                           | -                               |
| GF0031356 | 1                            | 0                        | 0                            | 0 Transmembrane protein 136 (1)                                        |                                                                                                                                                                                                                                           |                                                                                                                                                                                                                    | scaffold_6_mRNA_579.1           | -                           | -                               |
| GF0031355 | 1                            | 0                        | 0                            | 0 Cytokinin riboside 5'-monophosphate phosphoribohydrolase (1)         |                                                                                                                                                                                                                                           | LOG family [IPRO31100] (1); Cytokinin riboside 5'-monophosphate phosphoribohydrolase LOG [IPRO05269] (1)                                                                                                           | scaffold_6_mRNA_578.1           | -                           | -                               |
| GF0031354 | 1                            | 0                        | 0                            | 0 Hypothetical protein (1)                                             |                                                                                                                                                                                                                                           |                                                                                                                                                                                                                    | scaffold_6_mRNA_577.1           | -                           | -                               |
| GF0031353 | 1                            | 0                        | 0                            | 0 Hypothetical protein (1)                                             |                                                                                                                                                                                                                                           |                                                                                                                                                                                                                    | scaffold_6_mRNA_576.1           | -                           | -                               |
| GF0031352 | 1                            | 0                        | 0                            | 0 Hypothetical protein (1)                                             |                                                                                                                                                                                                                                           |                                                                                                                                                                                                                    | scaffold_6_mRNA_575.1           | -                           | -                               |
| GF0031351 | 1                            | 0                        | 0                            | 0 Hypothetical protein (1)                                             |                                                                                                                                                                                                                                           | LOG family [IPRO31100] (1)                                                                                                                                                                                         | scaffold_6_mRNA_570.1           | -                           | -                               |
| GF0031350 | 1                            | 0                        | 0                            | 0 Hypothetical protein (1)                                             |                                                                                                                                                                                                                                           |                                                                                                                                                                                                                    | scaffold_6_mRNA_569.1           | -                           | -                               |
| GF0031349 | 1                            | 0                        | 0                            | 0 Hypothetical protein (1)                                             |                                                                                                                                                                                                                                           |                                                                                                                                                                                                                    | scaffold_6_mRNA_568.1           | -                           | -                               |
| GF0031348 | 1                            | 0                        | 0                            | 0 Hypothetical protein (1)                                             |                                                                                                                                                                                                                                           | Viral movement protein [IPRO28919] (1)                                                                                                                                                                             | scaffold_6_mRNA_567.1           | -                           | -                               |
| GF0031347 | 1                            | 0                        | 0                            | 0 Hypothetical protein (1)                                             |                                                                                                                                                                                                                                           |                                                                                                                                                                                                                    | scaffold_6_mRNA_565.1           | -                           | -                               |
| GF0031346 | 1                            | 0                        | 0                            | 0 Hypothetical protein (1)                                             |                                                                                                                                                                                                                                           |                                                                                                                                                                                                                    | scaffold_6_mRNA_564.1           | -                           | -                               |
| GF0031345 | 1                            | 0                        | 0                            | 0 Hypothetical protein (1)                                             |                                                                                                                                                                                                                                           |                                                                                                                                                                                                                    | scaffold_6_mRNA_561.1           | -                           | -                               |
| GF0031344 | 1                            | 0                        | 0                            | 0 Hypothetical protein (1)                                             |                                                                                                                                                                                                                                           |                                                                                                                                                                                                                    | scaffold_6_mRNA_560.1           | -                           | -                               |
| GF0031343 | 1                            | 0                        | 0                            | 0 Cytokinin riboside 5'-monophosphate phosphoribohydrolase (1)         |                                                                                                                                                                                                                                           |                                                                                                                                                                                                                    | scaffold_6_mRNA_559.1           | -                           | -                               |
| GF0031342 | 1                            | 0                        | 0                            | 0 Hypothetical protein (1)                                             |                                                                                                                                                                                                                                           |                                                                                                                                                                                                                    | scaffold_6_mRNA_558.1           | -                           | -                               |
| GF0031341 | 1                            | 0                        | 0                            | 0 Hypothetical protein (1)                                             |                                                                                                                                                                                                                                           |                                                                                                                                                                                                                    | scaffold_6_mRNA_555.1           | -                           | -                               |
| GF0031340 | 1                            | 0                        | 0                            | 0 Hypothetical protein (1)                                             |                                                                                                                                                                                                                                           | Reverse transcriptase domain [IPRO00477] (1)                                                                                                                                                                       | scaffold_6_mRNA_554.1           | -                           | -                               |
| GF0031339 | 1                            | 0                        | 0                            | 0 Hypothetical protein (1)                                             |                                                                                                                                                                                                                                           |                                                                                                                                                                                                                    | scaffold_6_mRNA_552.1           | -                           | -                               |
| GF0031338 | 1                            | 0                        | 0                            | 0 Hypothetical protein (1)                                             |                                                                                                                                                                                                                                           | Domain of unknown function DUF4218 [IPRO25452] (1)                                                                                                                                                                 | scaffold_6_mRNA_551.1           | -                           | -                               |
| GF0031337 | 1                            | 0                        | 0                            | 0 Hypothetical protein (1)                                             |                                                                                                                                                                                                                                           |                                                                                                                                                                                                                    | scaffold_6_mRNA_55.1            | -                           | -                               |
| GF0031336 | 1                            | 0                        | 0                            | 0 Hypothetical protein (1)                                             |                                                                                                                                                                                                                                           | Retrotransposon gag domain [IPRO05162] (1)                                                                                                                                                                         | scaffold_6_mRNA_549.1           | -                           | -                               |
| GF0031335 | 1                            | 0                        | 0                            | 0 Hypothetical protein (1)                                             | nucleic acid binding [GO:0003676 molecular_function] (1); zinc ion binding [GO:0008270 molecular_function] (1)                                                                                                                            | Zinc finger, CCHC-type [IPRO01878] (1); Domain of unknown function DUF4219 [IPRO25314] (1)                                                                                                                         | scaffold_6_mRNA_548.1           | -                           | -                               |
| GF0031334 | 1                            | 0                        | 0                            | 0 Hypothetical protein (1)                                             |                                                                                                                                                                                                                                           |                                                                                                                                                                                                                    | scaffold_6_mRNA_546.1           | -                           | -                               |
| GF0031333 | 1                            | 0                        | 0                            | 0 Hypothetical protein (1)                                             |                                                                                                                                                                                                                                           | LOG family [IPRO31100] (1)                                                                                                                                                                                         | scaffold_6_mRNA_545.1           | -                           | -                               |
| GF0031332 | 1                            | 0                        | 0                            | 0 Hypothetical protein (1)                                             |                                                                                                                                                                                                                                           |                                                                                                                                                                                                                    | scaffold_6_mRNA_543.1           | -                           | -                               |
| GF0031331 | 1                            | 0                        | 0                            | 0 Hypothetical protein (1)                                             |                                                                                                                                                                                                                                           |                                                                                                                                                                                                                    | scaffold_6_mRNA_542.1           | -                           | -                               |

| ID        | Num. in <i>C. clementinae</i> | Num. in <i>C. uchiha</i> | Num. in <i>P. trifoliata</i> | Note                                                           | GO                                                                                                                                                                                                                       | InterPro                                                                                                                                                               | Members in <i>C. clementinae</i> | Members in <i>C. uchiha</i> | Members in <i>P. trifoliata</i> |
|-----------|-------------------------------|--------------------------|------------------------------|----------------------------------------------------------------|--------------------------------------------------------------------------------------------------------------------------------------------------------------------------------------------------------------------------|------------------------------------------------------------------------------------------------------------------------------------------------------------------------|----------------------------------|-----------------------------|---------------------------------|
| GF0031300 | 1                             | 0                        | 0                            | 0 Hypothetical protein (1)                                     |                                                                                                                                                                                                                          | Arabidopsis retrotransposon Orf1 [IPR004312] (1)                                                                                                                       | scaffold_6_mRNA_54.1             | -                           | -                               |
| GF0031329 | 1                             | 0                        | 0                            | 0 Cytokinin riboside 5'-monophosphate phosphoribohydrolase (1) |                                                                                                                                                                                                                          | LOG family [IPR031100] (1)                                                                                                                                             | scaffold_6_mRNA_539.1            | -                           | -                               |
| GF0031328 | 1                             | 0                        | 0                            | 0 Hypothetical protein (1)                                     |                                                                                                                                                                                                                          |                                                                                                                                                                        | scaffold_6_mRNA_538.1            | -                           | -                               |
| GF0031327 | 1                             | 0                        | 0                            | 0 Hypothetical protein (1)                                     |                                                                                                                                                                                                                          |                                                                                                                                                                        | scaffold_6_mRNA_536.1            | -                           | -                               |
| GF0031326 | 1                             | 0                        | 0                            | 0 Hypothetical protein (1)                                     |                                                                                                                                                                                                                          |                                                                                                                                                                        | scaffold_6_mRNA_535.1            | -                           | -                               |
| GF0031325 | 1                             | 0                        | 0                            | 0 Hypothetical protein (1)                                     |                                                                                                                                                                                                                          |                                                                                                                                                                        | scaffold_6_mRNA_534.1            | -                           | -                               |
| GF0031324 | 1                             | 0                        | 0                            | 0 Hypothetical protein (1)                                     |                                                                                                                                                                                                                          |                                                                                                                                                                        | scaffold_6_mRNA_531.1            | -                           | -                               |
| GF0031323 | 1                             | 0                        | 0                            | 0 Hypothetical protein (1)                                     |                                                                                                                                                                                                                          | Viral movement protein [IPR028919] (1)                                                                                                                                 | scaffold_6_mRNA_526.1            | -                           | -                               |
| GF0031322 | 1                             | 0                        | 0                            | 0 Hypothetical protein (1)                                     |                                                                                                                                                                                                                          |                                                                                                                                                                        | scaffold_6_mRNA_525.1            | -                           | -                               |
| GF0031321 | 1                             | 0                        | 0                            | 0 Hypothetical protein (1)                                     |                                                                                                                                                                                                                          |                                                                                                                                                                        | scaffold_6_mRNA_522.1            | -                           | -                               |
| GF0031320 | 1                             | 0                        | 0                            | 0 Hypothetical protein (1)                                     | zinc ion binding [GO:0008270 molecular_function] (1); nucleic acid binding [GO:0003676 molecular_function] (1)                                                                                                           | Zinc finger, CCHC-type [IPR001878] (1)                                                                                                                                 | scaffold_6_mRNA_521.1            | -                           | -                               |
| GF0031319 | 1                             | 0                        | 0                            | 0 Hypothetical protein (1)                                     |                                                                                                                                                                                                                          | Viral movement protein [IPR028919] (1)                                                                                                                                 | scaffold_6_mRNA_520.1            | -                           | -                               |
| GF0031318 | 1                             | 0                        | 0                            | 0 Hypothetical protein (1)                                     |                                                                                                                                                                                                                          |                                                                                                                                                                        | scaffold_6_mRNA_515.1            | -                           | -                               |
| GF0031317 | 1                             | 0                        | 0                            | 0 Hypothetical protein (1)                                     |                                                                                                                                                                                                                          |                                                                                                                                                                        | scaffold_6_mRNA_512.1            | -                           | -                               |
| GF0031316 | 1                             | 0                        | 0                            | 0 Cytokinin riboside 5'-monophosphate phosphoribohydrolase (1) |                                                                                                                                                                                                                          | LOG family [IPR031100] (1)                                                                                                                                             | scaffold_6_mRNA_511.1            | -                           | -                               |
| GF0031315 | 1                             | 0                        | 0                            | 0 Hypothetical protein (1)                                     |                                                                                                                                                                                                                          |                                                                                                                                                                        | scaffold_6_mRNA_510.1            | -                           | -                               |
| GF0031314 | 1                             | 0                        | 0                            | 0 Hypothetical protein (1)                                     |                                                                                                                                                                                                                          |                                                                                                                                                                        | scaffold_6_mRNA_507.1            | -                           | -                               |
| GF0031313 | 1                             | 0                        | 0                            | 0 Hypothetical protein (1)                                     | zinc ion binding [GO:0008270 molecular_function] (1); nucleic acid binding [GO:0003676 molecular_function] (1)                                                                                                           | Zinc finger, CCHC-type [IPR001878] (1)                                                                                                                                 | scaffold_6_mRNA_505.1            | -                           | -                               |
| GF0031312 | 1                             | 0                        | 0                            | 0 Hypothetical protein (1)                                     |                                                                                                                                                                                                                          |                                                                                                                                                                        | scaffold_6_mRNA_504.1            | -                           | -                               |
| GF0031311 | 1                             | 0                        | 0                            | 0 Hypothetical protein (1)                                     |                                                                                                                                                                                                                          |                                                                                                                                                                        | scaffold_6_mRNA_502.1            | -                           | -                               |
| GF0031310 | 1                             | 0                        | 0                            | 0 Hypothetical protein (1)                                     |                                                                                                                                                                                                                          |                                                                                                                                                                        | scaffold_6_mRNA_500.1            | -                           | -                               |
| GF0031309 | 1                             | 0                        | 0                            | 0 Cytokinin riboside 5'-monophosphate phosphoribohydrolase (1) |                                                                                                                                                                                                                          | Cytokinin riboside 5'-monophosphate phosphoribohydrolase LOG [IPR005269] (1); LOG family [IPR031100] (1)                                                               | scaffold_6_mRNA_499.1            | -                           | -                               |
| GF0031308 | 1                             | 0                        | 0                            | 0 Cytokinin riboside 5'-monophosphate phosphoribohydrolase (1) |                                                                                                                                                                                                                          | LOG family [IPR031100] (1)                                                                                                                                             | scaffold_6_mRNA_497.1            | -                           | -                               |
| GF0031307 | 1                             | 0                        | 0                            | 0 Hypothetical protein (1)                                     |                                                                                                                                                                                                                          |                                                                                                                                                                        | scaffold_6_mRNA_493.1            | -                           | -                               |
| GF0031306 | 1                             | 0                        | 0                            | 0 Hypothetical protein (1)                                     |                                                                                                                                                                                                                          |                                                                                                                                                                        | scaffold_6_mRNA_491.1            | -                           | -                               |
| GF0031305 | 1                             | 0                        | 0                            | 0 Hypothetical protein (1)                                     |                                                                                                                                                                                                                          |                                                                                                                                                                        | scaffold_6_mRNA_490.1            | -                           | -                               |
| GF0031304 | 1                             | 0                        | 0                            | 0 Hypothetical protein (1)                                     |                                                                                                                                                                                                                          |                                                                                                                                                                        | scaffold_6_mRNA_49.1             | -                           | -                               |
| GF0031303 | 1                             | 0                        | 0                            | 0 Retrotransposon protein, putative, Ty1-copia subclass (1)    | DNA integration [GO:0015074 biological_process] (1); zinc ion binding [GO:0008270 molecular_function] (1); nucleic acid binding [GO:0003676 molecular_function] (1)                                                      | Integrase, catalytic core [IPR001584] (1); Ribonuclease H-like domain [IPR012373] (1); Zinc finger, CCHC-type [IPR01878] (1); GAG-pnc-integrase domain [IPR025724] (1) | scaffold_6_mRNA_487.1            | -                           | -                               |
| GF0031302 | 1                             | 0                        | 0                            | 0 Hypothetical protein (1)                                     | ribosome [GO:0005840 cellular_component] (1); structural constituent of ribosome [GO:0003735 molecular_function] (1); intracellular [GO:0005622 cellular_component] (1); translation [GO:0006412 biological_process] (1) | Ribosomal protein L2 domain 2 [IPR014722] (1); Ribosomal protein L27c [IPR001141] (1)                                                                                  | scaffold_6_mRNA_480.1            | -                           | -                               |
| GF0031301 | 1                             | 0                        | 0                            | 0 Hypothetical protein (1)                                     |                                                                                                                                                                                                                          | Domain of unknown function DUF4219 [IPR025314] (1)                                                                                                                     | scaffold_6_mRNA_48.1             | -                           | -                               |
| GF0031300 | 1                             | 0                        | 0                            | 0 Hypothetical protein (1)                                     |                                                                                                                                                                                                                          |                                                                                                                                                                        | scaffold_6_mRNA_479.1            | -                           | -                               |
| GF0031299 | 1                             | 0                        | 0                            | 0 Hypothetical protein (1)                                     |                                                                                                                                                                                                                          |                                                                                                                                                                        | scaffold_6_mRNA_478.1            | -                           | -                               |
| GF0031298 | 1                             | 0                        | 0                            | 0 Hypothetical protein (1)                                     | nucleic acid binding [GO:0003676 molecular_function] (1); zinc ion binding [GO:0008270 molecular_function] (1)                                                                                                           | Zinc finger, CCHC-type [IPR001878] (1)                                                                                                                                 | scaffold_6_mRNA_474.1            | -                           | -                               |
| GF0031297 | 1                             | 0                        | 0                            | 0 Hypothetical protein (1)                                     |                                                                                                                                                                                                                          |                                                                                                                                                                        | scaffold_6_mRNA_473.1            | -                           | -                               |
| GF0031296 | 1                             | 0                        | 0                            | 0 Hypothetical protein (1)                                     |                                                                                                                                                                                                                          |                                                                                                                                                                        | scaffold_6_mRNA_469.1            | -                           | -                               |
| GF0031295 | 1                             | 0                        | 0                            | 0 Hypothetical protein (1)                                     | protein binding [GO:0005515 molecular_function] (1)                                                                                                                                                                      | Pentapeptide repeat [IPR002885] (1); Tetrapeptide-like helical domain [IPR011990] (1)                                                                                  | scaffold_6_mRNA_466.1            | -                           | -                               |
| GF0031294 | 1                             | 0                        | 0                            | 0 Hypothetical protein (1)                                     |                                                                                                                                                                                                                          |                                                                                                                                                                        | scaffold_6_mRNA_464.1            | -                           | -                               |
| GF0031293 | 1                             | 0                        | 0                            | 0 Hypothetical protein (1)                                     |                                                                                                                                                                                                                          | Viral movement protein [IPR028919] (1)                                                                                                                                 | scaffold_6_mRNA_463.1            | -                           | -                               |
| GF0031292 | 1                             | 0                        | 0                            | 0 Hypothetical protein (1)                                     | aspartic-type endopeptidase activity [GO:0004190 molecular_function] (1); proteolysis [GO:0006508 biological_process] (1)                                                                                                | Aspartic peptidase domain [IPR021109] (1); Peptidase A2A, retrovirus, catalytic [IPR001995] (1); Retropepsins [IPR018061] (1)                                          | scaffold_6_mRNA_462.1            | -                           | -                               |
| GF0031291 | 1                             | 0                        | 0                            | 0 Hypothetical protein (1)                                     |                                                                                                                                                                                                                          |                                                                                                                                                                        | scaffold_6_mRNA_456.1            | -                           | -                               |
| GF0031290 | 1                             | 0                        | 0                            | 0 Hypothetical protein (1)                                     | cysteine-type peptidase activity [GO:0008234 molecular_function] (1); proteolysis [GO:0006508 biological_process] (1)                                                                                                    | Upl1 protease family, C-terminal catalytic domain [IPR003653] (1); Domain of unknown function DUF1985 [IPR015410] (1)                                                  | scaffold_6_mRNA_450.1            | -                           | -                               |
| GF0031289 | 1                             | 0                        | 0                            | 0 Hypothetical protein (1)                                     |                                                                                                                                                                                                                          |                                                                                                                                                                        | scaffold_6_mRNA_447.1            | -                           | -                               |
| GF0031288 | 1                             | 0                        | 0                            | 0 Hypothetical protein (1)                                     |                                                                                                                                                                                                                          |                                                                                                                                                                        | scaffold_6_mRNA_446.1            | -                           | -                               |
| GF0031287 | 1                             | 0                        | 0                            | 0 Retrotransposon protein, putative, Ty3-gypsy subclass (1)    |                                                                                                                                                                                                                          | Reverse transcriptase domain [IPR000477] (1)                                                                                                                           | scaffold_6_mRNA_444.1            | -                           | -                               |
| GF0031286 | 1                             | 0                        | 0                            | 0 Hypothetical protein (1)                                     |                                                                                                                                                                                                                          |                                                                                                                                                                        | scaffold_6_mRNA_442.1            | -                           | -                               |
| GF0031285 | 1                             | 0                        | 0                            | 0 Hypothetical protein (1)                                     |                                                                                                                                                                                                                          | Viral movement protein [IPR028919] (1)                                                                                                                                 | scaffold_6_mRNA_440.1            | -                           | -                               |
| GF0031284 | 1                             | 0                        | 0                            | 0 Hypothetical protein (1)                                     |                                                                                                                                                                                                                          | Viral movement protein [IPR028919] (1)                                                                                                                                 | scaffold_6_mRNA_437.1            | -                           | -                               |
| GF0031283 | 1                             | 0                        | 0                            | 0 Hypothetical protein (1)                                     | zinc ion binding [GO:0008270 molecular_function] (1); nucleic acid binding [GO:0003676 molecular_function] (1)                                                                                                           | Zinc finger, CCHC-type [IPR001878] (1)                                                                                                                                 | scaffold_6_mRNA_435.1            | -                           | -                               |
| GF0031282 | 1                             | 0                        | 0                            | 0 Hypothetical protein (1)                                     |                                                                                                                                                                                                                          |                                                                                                                                                                        | scaffold_6_mRNA_434.1            | -                           | -                               |
| GF0031281 | 1                             | 0                        | 0                            | 0 Hypothetical protein (1)                                     |                                                                                                                                                                                                                          |                                                                                                                                                                        | scaffold_6_mRNA_425.1            | -                           | -                               |
| GF0031280 | 1                             | 0                        | 0                            | 0 Hypothetical protein (1)                                     |                                                                                                                                                                                                                          |                                                                                                                                                                        | scaffold_6_mRNA_423.1            | -                           | -                               |
| GF0031279 | 1                             | 0                        | 0                            | 0 Hypothetical protein (1)                                     |                                                                                                                                                                                                                          | Viral movement protein [IPR028919] (1)                                                                                                                                 | scaffold_6_mRNA_422.1            | -                           | -                               |
| GF0031278 | 1                             | 0                        | 0                            | 0 Hypothetical protein (1)                                     |                                                                                                                                                                                                                          | Probable transposase, Pta/En/Spm, plant [IPR004252] (1)                                                                                                                | scaffold_6_mRNA_421.1            | -                           | -                               |
| GF0031277 | 1                             | 0                        | 0                            | 0 Hypothetical protein (1)                                     | regulation of transcription, DNA-templated [GO:0006355 biological_process] (1)                                                                                                                                           | FHY3/FAR1 family [IPR031052] (1); FAR1 DNA binding domain [IPR004330] (1)                                                                                              | scaffold_6_mRNA_42.1             | -                           | -                               |
| GF0031276 | 1                             | 0                        | 0                            | 0 Hypothetical protein (1)                                     |                                                                                                                                                                                                                          |                                                                                                                                                                        | scaffold_6_mRNA_419.1            | -                           | -                               |
| GF0031275 | 1                             | 0                        | 0                            | 0 Hypothetical protein (1)                                     |                                                                                                                                                                                                                          | Retrotransposon gag domain [IPR005162] (1)                                                                                                                             | scaffold_6_mRNA_411.1            | -                           | -                               |
| GF0031274 | 1                             | 0                        | 0                            | 0 Hypothetical protein (1)                                     |                                                                                                                                                                                                                          |                                                                                                                                                                        | scaffold_6_mRNA_410.1            | -                           | -                               |
| GF0031273 | 1                             | 0                        | 0                            | 0 Hypothetical protein (1)                                     | aspartic-type endopeptidase activity [GO:0004190 molecular_function] (1); proteolysis [GO:0006508 biological_process] (1)                                                                                                | Aspartic peptidase, active site [IPR01060] (1); Peptidase A2A, retrovirus, catalytic [IPR001995] (1)                                                                   | scaffold_6_mRNA_407.1            | -                           | -                               |
| GF0031272 | 1                             | 0                        | 0                            | 0 Hypothetical protein (1)                                     | zinc ion binding [GO:0008270 molecular_function] (1); nucleic acid binding [GO:0003676 molecular_function] (1)                                                                                                           | Retropepsins [IPR010601] (1); Aspartic peptidase domain [IPR021109] (1); Zinc finger, CCHC-type [IPR001878] (1)                                                        | scaffold_6_mRNA_406.1            | -                           | -                               |
| GF0031271 | 1                             | 0                        | 0                            | 0 Hypothetical protein (1)                                     |                                                                                                                                                                                                                          |                                                                                                                                                                        | scaffold_6_mRNA_405.1            | -                           | -                               |
| GF0031270 | 1                             | 0                        | 0                            | 0 Hypothetical protein (1)                                     | DNA binding [GO:0003677 molecular_function] (1); nucleic acid binding [GO:0003676 molecular_function] (1)                                                                                                                | Zinc finger C2H2-type [IPR013087] (1); Ribonuclease H-like domain [IPR012373] (1); Zinc finger, BED-type [IPR003636] (1)                                               | scaffold_6_mRNA_399.1            | -                           | -                               |
| GF0031269 | 1                             | 0                        | 0                            | 0 Hypothetical protein (1)                                     |                                                                                                                                                                                                                          |                                                                                                                                                                        | scaffold_6_mRNA_398.1            | -                           | -                               |
| GF0031268 | 1                             | 0                        | 0                            | 0 Hypothetical protein (1)                                     |                                                                                                                                                                                                                          | Viral movement protein [IPR028919] (1)                                                                                                                                 | scaffold_6_mRNA_396.1            | -                           | -                               |
| GF0031267 | 1                             | 0                        | 0                            | 0 Hypothetical protein (1)                                     | nucleic acid binding [GO:0003676 molecular_function] (1); zinc ion binding [GO:0008270 molecular_function] (1)                                                                                                           | Zinc finger, CCHC-type [IPR001878] (1)                                                                                                                                 | scaffold_6_mRNA_395.1            | -                           | -                               |
| GF0031266 | 1                             | 0                        | 0                            | 0 Hypothetical protein (1)                                     |                                                                                                                                                                                                                          |                                                                                                                                                                        | scaffold_6_mRNA_392.1            | -                           | -                               |
| GF0031265 | 1                             | 0                        | 0                            | 0 Hypothetical protein (1)                                     |                                                                                                                                                                                                                          |                                                                                                                                                                        | scaffold_6_mRNA_385.1            | -                           | -                               |
| GF0031264 | 1                             | 0                        | 0                            | 0 Hypothetical protein (1)                                     |                                                                                                                                                                                                                          |                                                                                                                                                                        | scaffold_6_mRNA_38.1             | -                           | -                               |
| GF0031263 | 1                             | 0                        | 0                            | 0 Hypothetical protein (1)                                     | cysteine-type peptidase activity [GO:0008234 molecular_function] (1); proteolysis [GO:0006508 biological_process] (1)                                                                                                    | Upl1 protease family, C-terminal catalytic domain [IPR003653] (1)                                                                                                      | scaffold_6_mRNA_372.1            | -                           | -                               |
| GF0031262 | 1                             | 0                        | 0                            | 0 Hypothetical protein (1)                                     |                                                                                                                                                                                                                          |                                                                                                                                                                        | scaffold_6_mRNA_368.1            | -                           | -                               |
| GF0031261 | 1                             | 0                        | 0                            | 0 Hypothetical protein (1)                                     | nucleic acid binding [GO:0003676 molecular_function] (1); DNA binding [GO:0003677 molecular_function] (1)                                                                                                                | Zinc finger, BED-type [IPR003636] (1); Zinc finger C2H2-type [IPR013087] (1)                                                                                           | scaffold_6_mRNA_364.1            | -                           | -                               |
| GF0031260 | 1                             | 0                        | 0                            | 0 Hypothetical protein (1)                                     |                                                                                                                                                                                                                          |                                                                                                                                                                        | scaffold_6_mRNA_362.1            | -                           | -                               |
| GF0031259 | 1                             | 0                        | 0                            | 0 Cytokinin riboside 5'-monophosphate phosphoribohydrolase (1) |                                                                                                                                                                                                                          | LOG family [IPR031100] (1)                                                                                                                                             | scaffold_6_mRNA_36.1             | -                           | -                               |
| GF0031258 | 1                             | 0                        | 0                            | 0 Hypothetical protein (1)                                     |                                                                                                                                                                                                                          |                                                                                                                                                                        | scaffold_6_mRNA_355.1            | -                           | -                               |
| GF0031257 | 1                             | 0                        | 0                            | 0 Hypothetical protein (1)                                     |                                                                                                                                                                                                                          |                                                                                                                                                                        | scaffold_6_mRNA_352.1            | -                           | -                               |
| GF0031256 | 1                             | 0                        | 0                            | 0 Hypothetical protein (1)                                     |                                                                                                                                                                                                                          |                                                                                                                                                                        | scaffold_6_mRNA_35.1             | -                           | -                               |
| GF0031255 | 1                             | 0                        | 0                            | 0 Hypothetical protein (1)                                     |                                                                                                                                                                                                                          | Domain of unknown function DUF4218 [IPR025432] (1); Transposon, En/Spm-like [IPR004242] (1)                                                                            | scaffold_6_mRNA_346.1            | -                           | -                               |
| GF0031254 | 1                             | 0                        | 0                            | 0 Hypothetical protein (1)                                     |                                                                                                                                                                                                                          |                                                                                                                                                                        | scaffold_6_mRNA_344.1            | -                           | -                               |
| GF0031253 | 1                             | 0                        | 0                            | 0 Hypothetical protein (1)                                     |                                                                                                                                                                                                                          |                                                                                                                                                                        | scaffold_6_mRNA_342.1            | -                           | -                               |



| ID        | Num. in <i>C. clementiae</i> | Num. in <i>C. uchiha</i> | Num. in <i>P. trifoliate</i> | Note                                                             | GO                                                                                                                                                                                                                                                                                                                                                                                                                                                                                                      | InterPro                                                                                                                                                                                                                                                                                                                                                                                                                          | Members in <i>C. clementiae</i> | Members in <i>C. uchiha</i> | Members in <i>P. trifoliate</i> |
|-----------|------------------------------|--------------------------|------------------------------|------------------------------------------------------------------|---------------------------------------------------------------------------------------------------------------------------------------------------------------------------------------------------------------------------------------------------------------------------------------------------------------------------------------------------------------------------------------------------------------------------------------------------------------------------------------------------------|-----------------------------------------------------------------------------------------------------------------------------------------------------------------------------------------------------------------------------------------------------------------------------------------------------------------------------------------------------------------------------------------------------------------------------------|---------------------------------|-----------------------------|---------------------------------|
| GF0031252 | 1                            | 0                        | 0                            | 0 Hypothetical protein (1)                                       |                                                                                                                                                                                                                                                                                                                                                                                                                                                                                                         |                                                                                                                                                                                                                                                                                                                                                                                                                                   | scaffold_6_mRNA_338.1           | -                           | -                               |
| GF0031251 | 1                            | 0                        | 0                            | 0 Transposable element protein, putative (1)                     |                                                                                                                                                                                                                                                                                                                                                                                                                                                                                                         | Retransposon gag domain [IPR005162] (1)                                                                                                                                                                                                                                                                                                                                                                                           | scaffold_6_mRNA_336.1           | -                           | -                               |
| GF0031250 | 1                            | 0                        | 0                            | 0 Hypothetical protein (1)                                       |                                                                                                                                                                                                                                                                                                                                                                                                                                                                                                         |                                                                                                                                                                                                                                                                                                                                                                                                                                   | scaffold_6_mRNA_333.1           | -                           | -                               |
| GF0031249 | 1                            | 0                        | 0                            | 0 Hypothetical protein (1)                                       |                                                                                                                                                                                                                                                                                                                                                                                                                                                                                                         | Reverse transcriptase domain [IPR000477] (1)                                                                                                                                                                                                                                                                                                                                                                                      | scaffold_6_mRNA_330.1           | -                           | -                               |
| GF0031248 | 1                            | 0                        | 0                            | 0 Hypothetical protein (1)                                       |                                                                                                                                                                                                                                                                                                                                                                                                                                                                                                         |                                                                                                                                                                                                                                                                                                                                                                                                                                   | scaffold_6_mRNA_329.1           | -                           | -                               |
| GF0031247 | 1                            | 0                        | 0                            | 0 Hypothetical protein (1)                                       |                                                                                                                                                                                                                                                                                                                                                                                                                                                                                                         |                                                                                                                                                                                                                                                                                                                                                                                                                                   | scaffold_6_mRNA_328.1           | -                           | -                               |
| GF0031246 | 1                            | 0                        | 0                            | 0 Hypothetical protein (1)                                       |                                                                                                                                                                                                                                                                                                                                                                                                                                                                                                         |                                                                                                                                                                                                                                                                                                                                                                                                                                   | scaffold_6_mRNA_326.1           | -                           | -                               |
| GF0031245 | 1                            | 0                        | 0                            | 0 Hypothetical protein (1)                                       |                                                                                                                                                                                                                                                                                                                                                                                                                                                                                                         |                                                                                                                                                                                                                                                                                                                                                                                                                                   | scaffold_6_mRNA_325.1           | -                           | -                               |
| GF0031244 | 1                            | 0                        | 0                            | 0 Hypothetical protein (1)                                       |                                                                                                                                                                                                                                                                                                                                                                                                                                                                                                         |                                                                                                                                                                                                                                                                                                                                                                                                                                   | scaffold_6_mRNA_323.1           | -                           | -                               |
| GF0031243 | 1                            | 0                        | 0                            | 0 Hypothetical protein (1)                                       | DNA binding [GO:0003677 molecular_function] (1); nucleic acid binding [GO:0003676 molecular_function] (1)                                                                                                                                                                                                                                                                                                                                                                                               | Ribonuclease H-like domain [IPR012357] (1); hAT-like transposase, RNase-H fold [IPR025525] (1)                                                                                                                                                                                                                                                                                                                                    | scaffold_6_mRNA_320.1           | -                           | -                               |
| GF0031242 | 1                            | 0                        | 0                            | 0 Transposable element protein, putative, (1)                    |                                                                                                                                                                                                                                                                                                                                                                                                                                                                                                         | Retransposon gag domain [IPR005162] (1)                                                                                                                                                                                                                                                                                                                                                                                           | scaffold_6_mRNA_3189.1          | -                           | -                               |
| GF0031241 | 1                            | 0                        | 0                            | 0 Hypothetical protein (1)                                       |                                                                                                                                                                                                                                                                                                                                                                                                                                                                                                         |                                                                                                                                                                                                                                                                                                                                                                                                                                   | scaffold_6_mRNA_3187.1          | -                           | -                               |
| GF0031240 | 1                            | 0                        | 0                            | 0 Transposon protein, putative, Mutator sub-class, expressed (1) | nucleic acid binding [GO:0003676 molecular_function] (1); intracellular [GO:0008270 molecular_function] (1)                                                                                                                                                                                                                                                                                                                                                                                             | Zinc finger, PMZ-type [IPR006564] (1); Transposase, MuDR, plant [IPR004332] (1); Zinc finger, SWIM-type [IPR007527] (1); Zinc finger, CCHC-type [IPR001878] (1)                                                                                                                                                                                                                                                                   | scaffold_6_mRNA_3178.1          | -                           | -                               |
| GF0031239 | 1                            | 0                        | 0                            | 0 Hydroxyproline-rich glycoprotein family protein (1)            |                                                                                                                                                                                                                                                                                                                                                                                                                                                                                                         | Spo12 [IPR007727] (1)                                                                                                                                                                                                                                                                                                                                                                                                             | scaffold_6_mRNA_3167.1          | -                           | -                               |
| GF0031238 | 1                            | 0                        | 0                            | 0 Hypothetical protein (1)                                       |                                                                                                                                                                                                                                                                                                                                                                                                                                                                                                         | Leucine-rich repeat domain, L domain-like [IPR032675] (1)                                                                                                                                                                                                                                                                                                                                                                         | scaffold_6_mRNA_3091.1          | -                           | -                               |
| GF0031237 | 1                            | 0                        | 0                            | 0 Hypothetical protein (1)                                       |                                                                                                                                                                                                                                                                                                                                                                                                                                                                                                         | Domain of unknown function DUF4219 [IPR025314] (1)                                                                                                                                                                                                                                                                                                                                                                                | scaffold_6_mRNA_308.1           | -                           | -                               |
| GF0031236 | 1                            | 0                        | 0                            | 0 Hypothetical protein (1)                                       |                                                                                                                                                                                                                                                                                                                                                                                                                                                                                                         |                                                                                                                                                                                                                                                                                                                                                                                                                                   | scaffold_6_mRNA_3073.1          | -                           | -                               |
| GF0031235 | 1                            | 0                        | 0                            | 0 60S ribosomal protein L34 (1)                                  | ribosome [GO:0005840 cellular_component] (1); structural constituent of ribosome [GO:0003735 molecular_function] (1); intracellular [GO:0005622 cellular_component] (1); translation [GO:0006412 biological_process] (1)                                                                                                                                                                                                                                                                                | Ribosomal protein L34Ae [IPR008195] (1); Ribosomal protein L34e, conserved site [IPR018065] (1)                                                                                                                                                                                                                                                                                                                                   | scaffold_6_mRNA_3067.1          | -                           | -                               |
| GF0031234 | 1                            | 0                        | 0                            | 0 Hypothetical protein (1)                                       |                                                                                                                                                                                                                                                                                                                                                                                                                                                                                                         |                                                                                                                                                                                                                                                                                                                                                                                                                                   | scaffold_6_mRNA_3066.1          | -                           | -                               |
| GF0031233 | 1                            | 0                        | 0                            | 0 Hypothetical protein (1)                                       |                                                                                                                                                                                                                                                                                                                                                                                                                                                                                                         |                                                                                                                                                                                                                                                                                                                                                                                                                                   | scaffold_6_mRNA_3064.1          | -                           | -                               |
| GF0031232 | 1                            | 0                        | 0                            | 0 Hypothetical protein (1)                                       |                                                                                                                                                                                                                                                                                                                                                                                                                                                                                                         |                                                                                                                                                                                                                                                                                                                                                                                                                                   | scaffold_6_mRNA_3062.1          | -                           | -                               |
| GF0031231 | 1                            | 0                        | 0                            | 0 Hypothetical protein (1)                                       | protein binding [GO:0005515 molecular_function] (1)                                                                                                                                                                                                                                                                                                                                                                                                                                                     | Domain of unknown function DUF627, N-terminal [IPR006866] (1); Tetra-ribose-like helical domain [IPR011900] (1)                                                                                                                                                                                                                                                                                                                   | scaffold_6_mRNA_3061.1          | -                           | -                               |
| GF0031230 | 1                            | 0                        | 0                            | 0 Hypothetical protein (1)                                       |                                                                                                                                                                                                                                                                                                                                                                                                                                                                                                         | Quinoprotein alcohol dehydrogenase-like superfamily [IPR011047] (1); Pyrrolo-quinoline quinone repeat [IPR002372] (1)                                                                                                                                                                                                                                                                                                             | scaffold_6_mRNA_3036.1          | -                           | -                               |
| GF0031229 | 1                            | 0                        | 0                            | 0 Ubiquitin-conjugating enzyme E2 (1)                            |                                                                                                                                                                                                                                                                                                                                                                                                                                                                                                         | Ubiquitin-conjugating enzyme E2 [IPR000608] (1); Ubiquitin-conjugating enzyme-RWD-like [IPR016135] (1)                                                                                                                                                                                                                                                                                                                            | scaffold_6_mRNA_3034.1          | -                           | -                               |
| GF0031228 | 1                            | 0                        | 0                            | 0 Hypothetical protein (1)                                       |                                                                                                                                                                                                                                                                                                                                                                                                                                                                                                         | Amb-Allergen [IPR018082] (1); Pectin lyase fold/virulence factor [IPR011050] (1); Pectin lyase fold [IPR012334] (1)                                                                                                                                                                                                                                                                                                               | scaffold_6_mRNA_3024.1          | -                           | -                               |
| GF0031227 | 1                            | 0                        | 0                            | 0 Hypothetical protein (1)                                       |                                                                                                                                                                                                                                                                                                                                                                                                                                                                                                         |                                                                                                                                                                                                                                                                                                                                                                                                                                   | scaffold_6_mRNA_3021.1          | -                           | -                               |
| GF0031226 | 1                            | 0                        | 0                            | 0 Nucleic acid binding protein (1)                               | nucleic acid binding [GO:0003676 molecular_function] (1)                                                                                                                                                                                                                                                                                                                                                                                                                                                | Ribonuclease H-like domain [IPR012337] (1)                                                                                                                                                                                                                                                                                                                                                                                        | scaffold_6_mRNA_302.1           | -                           | -                               |
| GF0031225 | 1                            | 0                        | 0                            | 0 Hypothetical protein (1)                                       |                                                                                                                                                                                                                                                                                                                                                                                                                                                                                                         | Pectin lyase fold/virulence factor [IPR011050] (1); Pectin lyase fold [IPR012334] (1)                                                                                                                                                                                                                                                                                                                                             | scaffold_6_mRNA_3018.1          | -                           | -                               |
| GF0031224 | 1                            | 0                        | 0                            | 0 Hypothetical protein (1)                                       | DNA integration [GO:0015074 biological_process] (1); nucleus [GO:0005634 cellular_component] (1); nucleosome assembly [GO:0006334 biological_process] (1); nucleic acid binding [GO:0003676 molecular_function] (1)                                                                                                                                                                                                                                                                                     | Nucleosome assembly protein (NAP) [IPR021644] (1); Domain of unknown function DUF471 [IPR025398] (1); Ribonuclease H-like domain [IPR012337] (1); Integrase, catalytic core [IPR001584] (1)                                                                                                                                                                                                                                       | scaffold_6_mRNA_3017.1          | -                           | -                               |
| GF0031223 | 1                            | 0                        | 0                            | 0 Hypothetical protein (1)                                       |                                                                                                                                                                                                                                                                                                                                                                                                                                                                                                         |                                                                                                                                                                                                                                                                                                                                                                                                                                   | scaffold_6_mRNA_3015.1          | -                           | -                               |
| GF0031222 | 1                            | 0                        | 0                            | 0 Hypothetical protein (1)                                       | transferase activity, transferring acyl groups other than amino-acyl groups [GO:0016747 molecular_function] (1)                                                                                                                                                                                                                                                                                                                                                                                         | Transferase [IPR003480] (1)                                                                                                                                                                                                                                                                                                                                                                                                       | scaffold_6_mRNA_3014.1          | -                           | -                               |
| GF0031221 | 1                            | 0                        | 0                            | 0 Hypothetical protein (1)                                       | acylphosphatase activity [GO:0003998 molecular_function] (1)                                                                                                                                                                                                                                                                                                                                                                                                                                            | Acylphosphatase, conserved site [IPR017968] (1); Acylphosphatase-like domain [IPR017923] (1); Reverse transcriptase domain [IPR000477] (1); Acylphosphatase [IPR020456] (1)                                                                                                                                                                                                                                                       | scaffold_6_mRNA_301.1           | -                           | -                               |
| GF0031220 | 1                            | 0                        | 0                            | 0 LRR and NB-ARC domain disease resistance protein (1)           | ADP binding [GO:0043531 molecular_function] (1)                                                                                                                                                                                                                                                                                                                                                                                                                                                         | Receptor L-domain [IPR000494] (1); Leucine-rich repeat domain, L domain-like [IPR032675] (1); Winged helix-turn-helix DNA-binding domain [IPR011991] (1); P-loop containing nucleoside triphosphate hydrolase [IPR027417] (1); NB-ARC [IPR002182] (1)                                                                                                                                                                             | scaffold_6_mRNA_30.1            | -                           | -                               |
| GF0031219 | 1                            | 0                        | 0                            | 0 Putative inactive receptor kinase (1)                          | protein binding [GO:0005515 molecular_function] (1)                                                                                                                                                                                                                                                                                                                                                                                                                                                     | Leucine-rich repeat domain, L domain-like [IPR032675] (1); Leucine-rich repeat-containing N-terminal, plant-type [IPR013210] (1); Leucine-rich repeat [IPR001611] (1)                                                                                                                                                                                                                                                             | scaffold_6_mRNA_2985.1          | -                           | -                               |
| GF0031218 | 1                            | 0                        | 0                            | 0 Hypothetical protein (1)                                       |                                                                                                                                                                                                                                                                                                                                                                                                                                                                                                         | Protein of unknown function DUF761, plant [IPR008000] (1)                                                                                                                                                                                                                                                                                                                                                                         | scaffold_6_mRNA_2983.1          | -                           | -                               |
| GF0031217 | 1                            | 0                        | 0                            | 0 Hypothetical protein (1)                                       |                                                                                                                                                                                                                                                                                                                                                                                                                                                                                                         | Gibberellin regulated protein [IPR003854] (1)                                                                                                                                                                                                                                                                                                                                                                                     | scaffold_6_mRNA_2976.1          | -                           | -                               |
| GF0031216 | 1                            | 0                        | 0                            | 0 Hypothetical protein (1)                                       |                                                                                                                                                                                                                                                                                                                                                                                                                                                                                                         |                                                                                                                                                                                                                                                                                                                                                                                                                                   | scaffold_6_mRNA_2973.1          | -                           | -                               |
| GF0031215 | 1                            | 0                        | 0                            | 0 Protein CREG2 (1)                                              | FMN binding [GO:0010181 molecular_function] (1); oxidation-reduction process [GO:005114 biological_process] (1); oxidoreductase activity [GO:0016491 molecular_function] (1)                                                                                                                                                                                                                                                                                                                            | FMN-binding split barrel [IPR012349] (1); Cellular repressor of E1A-stimulated genes (CREG) [IPR014631] (1)                                                                                                                                                                                                                                                                                                                       | scaffold_6_mRNA_2965.1          | -                           | -                               |
| GF0031214 | 1                            | 0                        | 0                            | 0 F-box protein interaction domain protein (1)                   | protein binding [GO:0005515 molecular_function] (1)                                                                                                                                                                                                                                                                                                                                                                                                                                                     | Galactose oxidase/kelch, beta-propeller [IPR011043] (1); F-box associated interaction domain [IPR017451] (1); F-box domain [IPR01810] (1); F-box associated domain, type 1 [IPR006527] (1); Kelch-type beta propeller [IPR015915] (1)                                                                                                                                                                                             | scaffold_6_mRNA_2939.1          | -                           | -                               |
| GF0031213 | 1                            | 0                        | 0                            | 0 Hypothetical protein (1)                                       | protein binding [GO:0005515 molecular_function] (1)                                                                                                                                                                                                                                                                                                                                                                                                                                                     | F-box domain [IPR001810] (1)                                                                                                                                                                                                                                                                                                                                                                                                      | scaffold_6_mRNA_2938.1          | -                           | -                               |
| GF0031212 | 1                            | 0                        | 0                            | 0 Pollen Ole e 1 allergen and extensin (1)                       |                                                                                                                                                                                                                                                                                                                                                                                                                                                                                                         |                                                                                                                                                                                                                                                                                                                                                                                                                                   | scaffold_6_mRNA_2927.1          | -                           | -                               |
| GF0031211 | 1                            | 0                        | 0                            | 0 Hypothetical protein (1)                                       |                                                                                                                                                                                                                                                                                                                                                                                                                                                                                                         |                                                                                                                                                                                                                                                                                                                                                                                                                                   | scaffold_6_mRNA_289.1           | -                           | -                               |
| GF0031210 | 1                            | 0                        | 0                            | 0 Hypothetical protein (1)                                       |                                                                                                                                                                                                                                                                                                                                                                                                                                                                                                         |                                                                                                                                                                                                                                                                                                                                                                                                                                   | scaffold_6_mRNA_2884.1          | -                           | -                               |
| GF0031209 | 1                            | 0                        | 0                            | 0 Hypothetical protein (1)                                       |                                                                                                                                                                                                                                                                                                                                                                                                                                                                                                         |                                                                                                                                                                                                                                                                                                                                                                                                                                   | scaffold_6_mRNA_2872.1          | -                           | -                               |
| GF0031208 | 1                            | 0                        | 0                            | 0 NAD(P)-binding Rossmann-fold superfamily protein isoform 2 (1) |                                                                                                                                                                                                                                                                                                                                                                                                                                                                                                         | NAD(P)-binding domain [IPR016040] (1)                                                                                                                                                                                                                                                                                                                                                                                             | scaffold_6_mRNA_2871.2          | -                           | -                               |
| GF0031207 | 1                            | 0                        | 0                            | 0 Putative nuclear matrix constituent protein 1-like protein (1) |                                                                                                                                                                                                                                                                                                                                                                                                                                                                                                         |                                                                                                                                                                                                                                                                                                                                                                                                                                   | scaffold_6_mRNA_2854.1          | -                           | -                               |
| GF0031206 | 1                            | 0                        | 0                            | 0 Hypothetical protein (1)                                       |                                                                                                                                                                                                                                                                                                                                                                                                                                                                                                         |                                                                                                                                                                                                                                                                                                                                                                                                                                   | scaffold_6_mRNA_285.1           | -                           | -                               |
| GF0031205 | 1                            | 0                        | 0                            | 0 Cytochrome c oxidase biogenesis protein Cinc1-like (1)         |                                                                                                                                                                                                                                                                                                                                                                                                                                                                                                         | Cytochrome c oxidase biogenesis protein Cinc1-like [IPR013892] (1)                                                                                                                                                                                                                                                                                                                                                                | scaffold_6_mRNA_2836.1          | -                           | -                               |
| GF0031204 | 1                            | 0                        | 0                            | 0 Hypothetical protein (1)                                       |                                                                                                                                                                                                                                                                                                                                                                                                                                                                                                         | Reverse transcriptase zinc-binding domain [IPR026960] (1)                                                                                                                                                                                                                                                                                                                                                                         | scaffold_6_mRNA_2832.1          | -                           | -                               |
| GF0031203 | 1                            | 0                        | 0                            | 0 Hypothetical protein (1)                                       |                                                                                                                                                                                                                                                                                                                                                                                                                                                                                                         |                                                                                                                                                                                                                                                                                                                                                                                                                                   | scaffold_6_mRNA_283.1           | -                           | -                               |
| GF0031202 | 1                            | 0                        | 0                            | 0 Hypothetical protein (1)                                       |                                                                                                                                                                                                                                                                                                                                                                                                                                                                                                         |                                                                                                                                                                                                                                                                                                                                                                                                                                   | scaffold_6_mRNA_2820.1          | -                           | -                               |
| GF0031201 | 1                            | 0                        | 0                            | 0 Transmembrane isoform 1 (1)                                    |                                                                                                                                                                                                                                                                                                                                                                                                                                                                                                         |                                                                                                                                                                                                                                                                                                                                                                                                                                   | scaffold_6_mRNA_2815.1          | -                           | -                               |
| GF0031200 | 1                            | 0                        | 0                            | 0 Hypothetical protein (1)                                       | transmembrane transport [GO:005085 biological_process] (1); thiamine pyrophosphate binding [GO:0030976 molecular_function] (1); drug transmembrane transporter activity [GO:0015238 molecular_function] (1); antiporter activity [GO:0015297 molecular_function] (1); membrane [GO:0016020 cellular_component] (1); drug transmembrane transport [GO:0006855 biological_process] (1); magnesium ion binding [GO:0000287 molecular_function] (1); catalytic activity [GO:0003824 molecular_function] (1) | Thiamine pyrophosphate enzyme, C-terminal TPP-binding [IPR011766] (1); Thiamine pyrophosphate enzyme, central domain [IPR012000] (1); DHS-like NAD+ADP-binding domain [IPR028035] (1); Multi antimicrobial extrusion protein [IPR002528] (1); Thiamine pyrophosphate enzyme, N-terminal TPP-binding domain [IPR012011] (1); TPP-binding enzyme, conserved site [IPR000399] (1); Thiamine diphosphate binding fold [IPR029061] (1) | scaffold_6_mRNA_2777.1          | -                           | -                               |
| GF0031199 | 1                            | 0                        | 0                            | 0 Hypothetical protein (1)                                       |                                                                                                                                                                                                                                                                                                                                                                                                                                                                                                         |                                                                                                                                                                                                                                                                                                                                                                                                                                   | scaffold_6_mRNA_2775.1          | -                           | -                               |
| GF0031198 | 1                            | 0                        | 0                            | 0 Sugar transport protein 1 (1)                                  | integral component of membrane [GO:0016021 cellular_component] (1); transmembrane transporter activity [GO:002857 molecular_function] (1); transmembrane transport [GO:005085 biological_process] (1)                                                                                                                                                                                                                                                                                                   | Major facilitator superfamily domain [IPR020846] (1); Major facilitator, sugar transporter-like [IPR005828] (1)                                                                                                                                                                                                                                                                                                                   | scaffold_6_mRNA_2774.1          | -                           | -                               |

| ID        | Num. in <i>C. clementiae</i> | Num. in <i>C. uchiha</i> | Num. in <i>P. trifoliate</i> | Note                                                                   | GO                                                                                                                                                                                                                                                                                                                                                                                                                                                                           | InterPro                                                                                                                                                                                                                                                                                                                                                                                       | Members in <i>C. clementiae</i> | Members in <i>C. uchiha</i> | Members in <i>P. trifoliate</i> |
|-----------|------------------------------|--------------------------|------------------------------|------------------------------------------------------------------------|------------------------------------------------------------------------------------------------------------------------------------------------------------------------------------------------------------------------------------------------------------------------------------------------------------------------------------------------------------------------------------------------------------------------------------------------------------------------------|------------------------------------------------------------------------------------------------------------------------------------------------------------------------------------------------------------------------------------------------------------------------------------------------------------------------------------------------------------------------------------------------|---------------------------------|-----------------------------|---------------------------------|
| GF0031197 | 1                            | 0                        | 0                            | 0 SNW domain-containing protein 1 (1)                                  | mRNA splicing, via spliceosome [GO:0003098 biological_process] (1); spliceosomal complex [GO:0005681 cellular_component] (1)                                                                                                                                                                                                                                                                                                                                                 | SKI-interacting protein SKIP, SNW domain [IPRO04015] (1); SKI-interacting protein, SKIP [IPRO17862] (1)                                                                                                                                                                                                                                                                                        | scaffold_6_mRNA_2773.1          | -                           | -                               |
| GF0031196 | 1                            | 0                        | 0                            | 0 Hypothetical protein (1)                                             |                                                                                                                                                                                                                                                                                                                                                                                                                                                                              |                                                                                                                                                                                                                                                                                                                                                                                                | scaffold_6_mRNA_2772.1          | -                           | -                               |
| GF0031195 | 1                            | 0                        | 0                            | 0 Hypothetical protein (1)                                             |                                                                                                                                                                                                                                                                                                                                                                                                                                                                              |                                                                                                                                                                                                                                                                                                                                                                                                | scaffold_6_mRNA_2771.1          | -                           | -                               |
| GF0031194 | 1                            | 0                        | 0                            | 0 Retrotransposon protein, putative, Ty3-gypsy subclass, expressed (1) |                                                                                                                                                                                                                                                                                                                                                                                                                                                                              | Aspartic peptidase domain [IPRO21109] (1)                                                                                                                                                                                                                                                                                                                                                      | scaffold_6_mRNA_2770.1          | -                           | -                               |
| GF0031193 | 1                            | 0                        | 0                            | 0 Putative MATE efflux family protein (1)                              | drug transmembrane transport [GO:0006855 biological_process] (1); drug transmembrane transporter activity [GO:0015238 molecular_function] (1); antiporter activity [GO:0015297 molecular_function] (1); membrane [GO:0016020 cellular_component] (1); transmembrane transport [GO:0055085 biological_process] (1)                                                                                                                                                            | Multi antimicrobial extrusion protein [IPRO25258] (1)                                                                                                                                                                                                                                                                                                                                          | scaffold_6_mRNA_2769.1          | -                           | -                               |
| GF0031192 | 1                            | 0                        | 0                            | 0 Hypothetical protein (1)                                             |                                                                                                                                                                                                                                                                                                                                                                                                                                                                              |                                                                                                                                                                                                                                                                                                                                                                                                | scaffold_6_mRNA_276.1           | -                           | -                               |
| GF0031191 | 1                            | 0                        | 0                            | 0 E3 ubiquitin-protein ligase (1)                                      | multicellular organism development [GO:007275 biological_process] (1); protein binding [GO:0005515 molecular_function] (1); zinc ion binding [GO:0008270 molecular_function] (1); ubiquitin-dependent protein catabolic process [GO:0006511 biological_process] (1); nucleus [GO:0005634 cellular_component] (1) carbohydrate metabolic process [GO:000975 biological_process] (1); hydrolase activity, hydrolyzing O-glycosyl compounds [GO:0004553 molecular_function] (1) | TRAF-like [IPRO08974] (1); Zinc finger, SIAH-type [IPRO13010] (1); E3 ubiquitin-protein ligase SIN-like [IPRO04452] (1); Zinc finger, RING-type [IPRO1841] (1); Zinc finger, RING/YVE/PHD-type [IPRO13083] (1); Seven-in-absentia protein, TRAF-like domain [IPRO18121] (1)                                                                                                                    | scaffold_6_mRNA_2742.1          | -                           | -                               |
| GF0031190 | 1                            | 0                        | 0                            | 0 Hypothetical protein (1)                                             |                                                                                                                                                                                                                                                                                                                                                                                                                                                                              | Glycoside hydrolase family 1 [IPRO01360] (1); Glycoside hydrolase superfamily [IPRO17853] (1)                                                                                                                                                                                                                                                                                                  | scaffold_6_mRNA_2739.1          | -                           | -                               |
| GF0031189 | 1                            | 0                        | 0                            | 0 Hypothetical protein (1)                                             |                                                                                                                                                                                                                                                                                                                                                                                                                                                                              |                                                                                                                                                                                                                                                                                                                                                                                                | scaffold_6_mRNA_273.1           | -                           | -                               |
| GF0031188 | 1                            | 0                        | 0                            | 0 Hypothetical protein (1)                                             | nucleic acid binding [GO:0003676 molecular_function] (1); zinc ion binding [GO:0008270 molecular_function] (1)                                                                                                                                                                                                                                                                                                                                                               | Zinc finger, CCHC-type [IPRO01878] (1)                                                                                                                                                                                                                                                                                                                                                         | scaffold_6_mRNA_2729.1          | -                           | -                               |
| GF0031187 | 1                            | 0                        | 0                            | 0 Hypothetical protein (1)                                             |                                                                                                                                                                                                                                                                                                                                                                                                                                                                              | Retrotransposon gag domain [IPRO05162] (1)                                                                                                                                                                                                                                                                                                                                                     | scaffold_6_mRNA_2712.1          | -                           | -                               |
| GF0031186 | 1                            | 0                        | 0                            | 0 Hypothetical protein (1)                                             |                                                                                                                                                                                                                                                                                                                                                                                                                                                                              |                                                                                                                                                                                                                                                                                                                                                                                                | scaffold_6_mRNA_2711.1          | -                           | -                               |
| GF0031185 | 1                            | 0                        | 0                            | 0 Hypothetical protein (1)                                             |                                                                                                                                                                                                                                                                                                                                                                                                                                                                              |                                                                                                                                                                                                                                                                                                                                                                                                | scaffold_6_mRNA_2710.1          | -                           | -                               |
| GF0031184 | 1                            | 0                        | 0                            | 0 An2 truncated protein (1)                                            | DNA binding [GO:0003677 molecular_function] (1)                                                                                                                                                                                                                                                                                                                                                                                                                              | SANT/Myb domain [IPRO01005] (1); Homeobox domain-like [IPRO09057] (1); Myb domain [IPRO17930] (1)                                                                                                                                                                                                                                                                                              | scaffold_6_mRNA_2708.1          | -                           | -                               |
| GF0031183 | 1                            | 0                        | 0                            | 0 Hypothetical protein (1)                                             |                                                                                                                                                                                                                                                                                                                                                                                                                                                                              |                                                                                                                                                                                                                                                                                                                                                                                                | scaffold_6_mRNA_270.1           | -                           | -                               |
| GF0031182 | 1                            | 0                        | 0                            | 0 Hypothetical protein (1)                                             |                                                                                                                                                                                                                                                                                                                                                                                                                                                                              |                                                                                                                                                                                                                                                                                                                                                                                                | scaffold_6_mRNA_2671.1          | -                           | -                               |
| GF0031181 | 1                            | 0                        | 0                            | 0 Hypothetical protein (1)                                             |                                                                                                                                                                                                                                                                                                                                                                                                                                                                              | Transposase, MuDR, plant [IPRO04332] (1)                                                                                                                                                                                                                                                                                                                                                       | scaffold_6_mRNA_267.1           | -                           | -                               |
| GF0031180 | 1                            | 0                        | 0                            | 0 Gibberellin acid-stimulated protein 1 (1)                            |                                                                                                                                                                                                                                                                                                                                                                                                                                                                              | Gibberellin regulated protein [IPRO03854] (1)                                                                                                                                                                                                                                                                                                                                                  | scaffold_6_mRNA_2666.1          | -                           | -                               |
| GF0031179 | 1                            | 0                        | 0                            | 0 Salutaridin 7-O-acetyltransferase (1)                                | transferase activity, transferring acyl groups other than amino-acyl groups [GO:0016747 molecular_function] (1)                                                                                                                                                                                                                                                                                                                                                              | Transferase [IPRO03480] (1)                                                                                                                                                                                                                                                                                                                                                                    | scaffold_6_mRNA_2664.1          | -                           | -                               |
| GF0031178 | 1                            | 0                        | 0                            | 0 Hypothetical protein (1)                                             |                                                                                                                                                                                                                                                                                                                                                                                                                                                                              |                                                                                                                                                                                                                                                                                                                                                                                                | scaffold_6_mRNA_264.1           | -                           | -                               |
| GF0031177 | 1                            | 0                        | 0                            | 0 Hypothetical protein (1)                                             |                                                                                                                                                                                                                                                                                                                                                                                                                                                                              |                                                                                                                                                                                                                                                                                                                                                                                                | scaffold_6_mRNA_262.1           | -                           | -                               |
| GF0031176 | 1                            | 0                        | 0                            | 0 Putative exocyst complex component 6 (1)                             | vesicle docking involved in exocytosis [GO:0006904 biological_process] (1); exocyst [GO:0000145 cellular_component] (1)                                                                                                                                                                                                                                                                                                                                                      | Exocyst complex component EXOC6/Sec15 [IPRO07225] (1)                                                                                                                                                                                                                                                                                                                                          | scaffold_6_mRNA_2616.1          | -                           | -                               |
| GF0031175 | 1                            | 0                        | 0                            | 0 Hypothetical protein (1)                                             | integral component of membrane [GO:0016021 cellular_component] (1); membrane [GO:0016020 cellular_component] (1); transmembrane transporter activity [GO:0022837 molecular_function] (1)                                                                                                                                                                                                                                                                                     | EamA domain [IPRO00620] (1); WAT1-related protein [IPRO030184] (1)                                                                                                                                                                                                                                                                                                                             | scaffold_6_mRNA_2612.1          | -                           | -                               |
| GF0031174 | 1                            | 0                        | 0                            | 0 Hypothetical protein (1)                                             | protein binding [GO:0005515 molecular_function] (1)                                                                                                                                                                                                                                                                                                                                                                                                                          | Tetratricopeptide repeat [IPRO19734] (1); Tetratricopeptide repeat-containing domain [IPRO13026] (1); Peptidyl-prolyl cis-trans isomerase, FKBP-type [IPRO23566] (1); Tetratricopeptide-like helical domain [IPRO11990] (1)                                                                                                                                                                    | scaffold_6_mRNA_2611.1          | -                           | -                               |
| GF0031173 | 1                            | 0                        | 0                            | 0 NAC transcription factor (1)                                         | DNA binding [GO:0003677 molecular_function] (1); transcription, DNA-templated [GO:0006351 biological_process] (1); regulation of transcription, DNA-templated [GO:0006355 biological_process] (1)                                                                                                                                                                                                                                                                            | NAC domain [IPRO03441] (1); Transcription elongation factor S-II, central domain [IPRO03618] (1)                                                                                                                                                                                                                                                                                               | scaffold_6_mRNA_2603.1          | -                           | -                               |
| GF0031172 | 1                            | 0                        | 0                            | 0 Hypothetical protein (1)                                             |                                                                                                                                                                                                                                                                                                                                                                                                                                                                              | Retrotransposon gag domain [IPRO05162] (1)                                                                                                                                                                                                                                                                                                                                                     | scaffold_6_mRNA_26.1            | -                           | -                               |
| GF0031171 | 1                            | 0                        | 0                            | 0 Receptor-like protein kinase FERONIA (1)                             | ATP binding [GO:0005524 molecular_function] (1); protein kinase activity [GO:0004672 molecular_function] (1); protein phosphorylation [GO:0006468 biological_process] (1)                                                                                                                                                                                                                                                                                                    | Malicin-like carbohydrate-binding domain [IPRO24788] (1); Protein kinase-like domain [IPRO11009] (1); Protein kinase domain [IPRO00719] (1); Serine/threonine/tyrosine-protein kinase, catalytic domain [IPRO01245] (1); Serine/threonine-protein kinase, active site [IPRO08271] (1); Protein kinase, ATP binding site [IPRO17441] (1)                                                        | scaffold_6_mRNA_2590.1          | -                           | -                               |
| GF0031170 | 1                            | 0                        | 0                            | 0 Hypothetical protein (1)                                             |                                                                                                                                                                                                                                                                                                                                                                                                                                                                              |                                                                                                                                                                                                                                                                                                                                                                                                | scaffold_6_mRNA_2585.1          | -                           | -                               |
| GF0031169 | 1                            | 0                        | 0                            | 0 Hypothetical protein (1)                                             |                                                                                                                                                                                                                                                                                                                                                                                                                                                                              |                                                                                                                                                                                                                                                                                                                                                                                                | scaffold_6_mRNA_2570.1          | -                           | -                               |
| GF0031168 | 1                            | 0                        | 0                            | 0 Hypothetical protein (1)                                             |                                                                                                                                                                                                                                                                                                                                                                                                                                                                              |                                                                                                                                                                                                                                                                                                                                                                                                | scaffold_6_mRNA_256.1           | -                           | -                               |
| GF0031167 | 1                            | 0                        | 0                            | 0 Hypothetical protein (1)                                             |                                                                                                                                                                                                                                                                                                                                                                                                                                                                              |                                                                                                                                                                                                                                                                                                                                                                                                | scaffold_6_mRNA_2554.1          | -                           | -                               |
| GF0031166 | 1                            | 0                        | 0                            | 0 Hypothetical protein (1)                                             | protein binding [GO:0005515 molecular_function] (1)                                                                                                                                                                                                                                                                                                                                                                                                                          | PAZ domain [IPRO03100] (1); Argonaute, linker 1 domain [IPRO14811] (1)                                                                                                                                                                                                                                                                                                                         | scaffold_6_mRNA_2553.1          | -                           | -                               |
| GF0031165 | 1                            | 0                        | 0                            | 0 Hypothetical protein (1)                                             |                                                                                                                                                                                                                                                                                                                                                                                                                                                                              |                                                                                                                                                                                                                                                                                                                                                                                                | scaffold_6_mRNA_253.1           | -                           | -                               |
| GF0031164 | 1                            | 0                        | 0                            | 0 Retrotransposon gag protein (1)                                      |                                                                                                                                                                                                                                                                                                                                                                                                                                                                              | Paranoeplastic antigen Ma [IPRO26523] (1); Aspartic peptidase domain [IPRO21109] (1); Retrotransposon gag domain [IPRO05162] (1); LOG family [IPRO31100] (1); Reverse transcriptase domain [IPRO00477] (1)                                                                                                                                                                                     | scaffold_6_mRNA_252.1           | -                           | -                               |
| GF0031163 | 1                            | 0                        | 0                            | 0 Hypothetical protein (1)                                             |                                                                                                                                                                                                                                                                                                                                                                                                                                                                              |                                                                                                                                                                                                                                                                                                                                                                                                | scaffold_6_mRNA_2511.1          | -                           | -                               |
| GF0031162 | 1                            | 0                        | 0                            | 0 Hypothetical protein (1)                                             |                                                                                                                                                                                                                                                                                                                                                                                                                                                                              |                                                                                                                                                                                                                                                                                                                                                                                                | scaffold_6_mRNA_25.1            | -                           | -                               |
| GF0031161 | 1                            | 0                        | 0                            | 0 Hypothetical protein (1)                                             | nucleic acid binding [GO:0003676 molecular_function] (1)                                                                                                                                                                                                                                                                                                                                                                                                                     | Ribonuclease H-like domain [IPRO12337] (1)                                                                                                                                                                                                                                                                                                                                                     | scaffold_6_mRNA_2496.1          | -                           | -                               |
| GF0031160 | 1                            | 0                        | 0                            | 0 Hypothetical protein (1)                                             |                                                                                                                                                                                                                                                                                                                                                                                                                                                                              |                                                                                                                                                                                                                                                                                                                                                                                                | scaffold_6_mRNA_2484.1          | -                           | -                               |
| GF0031159 | 1                            | 0                        | 0                            | 0 Hypothetical protein (1)                                             | proteolysis [GO:0006508 biological_process] (1); cysteine-type peptidase activity [GO:0008234 molecular_function] (1)                                                                                                                                                                                                                                                                                                                                                        | Upl1 protease family, C-terminal catalytic domain [IPRO03653] (1)                                                                                                                                                                                                                                                                                                                              | scaffold_6_mRNA_2483.1          | -                           | -                               |
| GF0031158 | 1                            | 0                        | 0                            | 0 Hypothetical protein (1)                                             |                                                                                                                                                                                                                                                                                                                                                                                                                                                                              |                                                                                                                                                                                                                                                                                                                                                                                                | scaffold_6_mRNA_248.1           | -                           | -                               |
| GF0031157 | 1                            | 0                        | 0                            | 0 Hypothetical protein (1)                                             | ATP binding [GO:0005524 molecular_function] (1); ATPase activity [GO:0016887 molecular_function] (1); membrane [GO:0016020 cellular_component] (1)                                                                                                                                                                                                                                                                                                                           | Plant PDR ABC transporter associated [IPRO13581] (1); ABC-transporter extracellular N-terminal domain [IPRO29481] (1); P-loop containing nucleoside triphosphate hydrolase [IPRO27417] (1); AAA+ ATPase domain [IPRO03593] (1); ABC-2 type transporter [IPRO13555] (1); ATP-binding cassette transporter, PDR-like subfamily G, domain 1 [IPRO34001] (1); ABC transporter-like [IPRO03439] (1) | scaffold_6_mRNA_2473.1          | -                           | -                               |
| GF0031156 | 1                            | 0                        | 0                            | 0 Hypothetical protein (1)                                             |                                                                                                                                                                                                                                                                                                                                                                                                                                                                              |                                                                                                                                                                                                                                                                                                                                                                                                | scaffold_6_mRNA_247.1           | -                           | -                               |
| GF0031155 | 1                            | 0                        | 0                            | 0 Cytochrome P450 94A1 (1)                                             | iron ion binding [GO:0005506 molecular_function] (1); heme binding [GO:0020037 molecular_function] (1); oxidation-reduction process [GO:005114 biological_process] (1); oxidoreductase activity, acting on paired donors, with incorporation or reduction of molecular oxygen [GO:0016705 molecular_function] (1)                                                                                                                                                            | Cytochrome P450 [IPRO01128] (1)                                                                                                                                                                                                                                                                                                                                                                | scaffold_6_mRNA_2464.1          | -                           | -                               |
| GF0031154 | 1                            | 0                        | 0                            | 0 Hypothetical protein (1)                                             |                                                                                                                                                                                                                                                                                                                                                                                                                                                                              |                                                                                                                                                                                                                                                                                                                                                                                                | scaffold_6_mRNA_2461.1          | -                           | -                               |
| GF0031153 | 1                            | 0                        | 0                            | 0 Hypothetical protein (1)                                             |                                                                                                                                                                                                                                                                                                                                                                                                                                                                              |                                                                                                                                                                                                                                                                                                                                                                                                | scaffold_6_mRNA_246.1           | -                           | -                               |
| GF0031152 | 1                            | 0                        | 0                            | 0 Solute carrier family 35 member F2 isoform 4 (1)                     | integral component of membrane [GO:0016021 cellular_component] (1); transport [GO:0006810 biological_process] (1)                                                                                                                                                                                                                                                                                                                                                            | Solute carrier family 35 member SLC35F1/F2/F6 [IPRO09262] (1)                                                                                                                                                                                                                                                                                                                                  | scaffold_6_mRNA_2452.1          | -                           | -                               |
| GF0031151 | 1                            | 0                        | 0                            | 0 Hypothetical protein (1)                                             |                                                                                                                                                                                                                                                                                                                                                                                                                                                                              |                                                                                                                                                                                                                                                                                                                                                                                                | scaffold_6_mRNA_245.1           | -                           | -                               |
| GF0031150 | 1                            | 0                        | 0                            | 0 Hypothetical protein (1)                                             |                                                                                                                                                                                                                                                                                                                                                                                                                                                                              | Alpha/Beta hydrolase fold [IPRO29058] (1)                                                                                                                                                                                                                                                                                                                                                      | scaffold_6_mRNA_2442.1          | -                           | -                               |
| GF0031149 | 1                            | 0                        | 0                            | 0 Hypothetical protein (1)                                             |                                                                                                                                                                                                                                                                                                                                                                                                                                                                              | Viral movement protein [IPRO28919] (1)                                                                                                                                                                                                                                                                                                                                                         | scaffold_6_mRNA_244.1           | -                           | -                               |
| GF0031148 | 1                            | 0                        | 0                            | 0 Hypothetical protein (1)                                             |                                                                                                                                                                                                                                                                                                                                                                                                                                                                              |                                                                                                                                                                                                                                                                                                                                                                                                | scaffold_6_mRNA_2435.1          | -                           | -                               |
| GF0031147 | 1                            | 0                        | 0                            | 0 Hypothetical protein (1)                                             |                                                                                                                                                                                                                                                                                                                                                                                                                                                                              |                                                                                                                                                                                                                                                                                                                                                                                                | scaffold_6_mRNA_243.1           | -                           | -                               |
| GF0031146 | 1                            | 0                        | 0                            | 0 Hypothetical protein (1)                                             |                                                                                                                                                                                                                                                                                                                                                                                                                                                                              |                                                                                                                                                                                                                                                                                                                                                                                                | scaffold_6_mRNA_2429.1          | -                           | -                               |

| ID        | Num. in <i>C. clementiae</i> | Num in <i>C. uchiha</i> | Num in <i>P. trifoliata</i> | Note                                                                                    | GO                                                                                                                                                                                                                                                                                                                                                                                                         | InterPro                                                                                                                                                                                                                                                                      | Members in <i>C. clementiae</i> | Members in <i>C. uchiha</i> | Members in <i>P. trifoliata</i> |
|-----------|------------------------------|-------------------------|-----------------------------|-----------------------------------------------------------------------------------------|------------------------------------------------------------------------------------------------------------------------------------------------------------------------------------------------------------------------------------------------------------------------------------------------------------------------------------------------------------------------------------------------------------|-------------------------------------------------------------------------------------------------------------------------------------------------------------------------------------------------------------------------------------------------------------------------------|---------------------------------|-----------------------------|---------------------------------|
| GF0031145 | 1                            | 0                       | 0                           | 0 Hypothetical protein (1)                                                              |                                                                                                                                                                                                                                                                                                                                                                                                            | Viral movement protein [IPR028919] (1)                                                                                                                                                                                                                                        | scaffold_6_mRNA_242.1           | -                           | -                               |
| GF0031144 | 1                            | 0                       | 0                           | 0 Hypothetical protein (1)                                                              |                                                                                                                                                                                                                                                                                                                                                                                                            |                                                                                                                                                                                                                                                                               | scaffold_6_mRNA_241.1           | -                           | -                               |
| GF0031143 | 1                            | 0                       | 0                           | 0 Hypothetical protein (1)                                                              |                                                                                                                                                                                                                                                                                                                                                                                                            |                                                                                                                                                                                                                                                                               | scaffold_6_mRNA_240.1           | -                           | -                               |
| GF0031142 | 1                            | 0                       | 0                           | 0 Hypothetical protein (1)                                                              |                                                                                                                                                                                                                                                                                                                                                                                                            |                                                                                                                                                                                                                                                                               | scaffold_6_mRNA_24.1            | -                           | -                               |
| GF0031141 | 1                            | 0                       | 0                           | 0 Hypothetical protein (1)                                                              |                                                                                                                                                                                                                                                                                                                                                                                                            |                                                                                                                                                                                                                                                                               | scaffold_6_mRNA_239.1           | -                           | -                               |
| GF0031140 | 1                            | 0                       | 0                           | 0 Hypothetical protein (1)                                                              |                                                                                                                                                                                                                                                                                                                                                                                                            |                                                                                                                                                                                                                                                                               | scaffold_6_mRNA_238.1           | -                           | -                               |
| GF0031139 | 1                            | 0                       | 0                           | 0 RNA binding family protein isoform 1 (1)                                              | nucleic acid binding [GO:0003676 molecular_function] (1)                                                                                                                                                                                                                                                                                                                                                   | RNA recognition motif domain [IPR000594] (1)                                                                                                                                                                                                                                  | scaffold_6_mRNA_2376.1          | -                           | -                               |
| GF0031138 | 1                            | 0                       | 0                           | 0 Embryo defective 2735 (1)                                                             |                                                                                                                                                                                                                                                                                                                                                                                                            |                                                                                                                                                                                                                                                                               | scaffold_6_mRNA_2372.1          | -                           | -                               |
| GF0031137 | 1                            | 0                       | 0                           | 0 Hypothetical protein (1)                                                              |                                                                                                                                                                                                                                                                                                                                                                                                            | Viral movement protein [IPR028919] (1)                                                                                                                                                                                                                                        | scaffold_6_mRNA_237.1           | -                           | -                               |
| GF0031136 | 1                            | 0                       | 0                           | 0 Hypothetical protein (1)                                                              | nucleic acid binding [GO:0003676 molecular_function] (1); DNA binding [GO:0003677 molecular_function] (1)                                                                                                                                                                                                                                                                                                  | Zinc finger C2H2-type [IPR013087] (1); Zinc finger, BED-type [IPR003656] (1)                                                                                                                                                                                                  | scaffold_6_mRNA_2363.1          | -                           | -                               |
| GF0031135 | 1                            | 0                       | 0                           | 0 Hypothetical protein (1)                                                              |                                                                                                                                                                                                                                                                                                                                                                                                            |                                                                                                                                                                                                                                                                               | scaffold_6_mRNA_236.1           | -                           | -                               |
| GF0031134 | 1                            | 0                       | 0                           | 0 Hypothetical protein (1)                                                              |                                                                                                                                                                                                                                                                                                                                                                                                            |                                                                                                                                                                                                                                                                               | scaffold_6_mRNA_233.1           | -                           | -                               |
| GF0031133 | 1                            | 0                       | 0                           | 0 Dof zinc finger protein DOF3.5 (1)                                                    | regulation of transcription, DNA-templated [GO:0006355 biological_process] (1); DNA binding [GO:0003677 molecular_function] (1)                                                                                                                                                                                                                                                                            | Zinc finger, Dof-type [IPR003851] (1)                                                                                                                                                                                                                                         | scaffold_6_mRNA_2321.1          | -                           | -                               |
| GF0031132 | 1                            | 0                       | 0                           | 0 Hypothetical protein (1)                                                              |                                                                                                                                                                                                                                                                                                                                                                                                            |                                                                                                                                                                                                                                                                               | scaffold_6_mRNA_232.1           | -                           | -                               |
| GF0031131 | 1                            | 0                       | 0                           | 0 Hypothetical protein (1)                                                              |                                                                                                                                                                                                                                                                                                                                                                                                            |                                                                                                                                                                                                                                                                               | scaffold_6_mRNA_231.1           | -                           | -                               |
| GF0031130 | 1                            | 0                       | 0                           | 0 40S ribosomal protein S5 (1)                                                          | translation [GO:0006412 biological_process] (1); structural constituent of ribosome [GO:0003735 molecular_function] (1); RNA binding [GO:0003723 molecular_function] (1); small ribosomal subunit [GO:0015935 cellular_component] (1)                                                                                                                                                                      | Ribosomal protein S7, conserved site [IPR020606] (1); Ribosomal protein S7 domain [IPR023798] (1); Ribosomal protein S5 S7 [IPR000235] (1); Ribosomal protein S5-S7, eukaryotic/archaeal [IPR005716] (1)                                                                      | scaffold_6_mRNA_2285.1          | -                           | -                               |
| GF0031129 | 1                            | 0                       | 0                           | 0 Hypothetical protein (1)                                                              |                                                                                                                                                                                                                                                                                                                                                                                                            |                                                                                                                                                                                                                                                                               | scaffold_6_mRNA_226.1           | -                           | -                               |
| GF0031128 | 1                            | 0                       | 0                           | 0 Programmed cell death protein, putative (1)                                           | nucleic acid binding [GO:0003676 molecular_function] (1)                                                                                                                                                                                                                                                                                                                                                   | RNA-binding domain, S1 [IPR022967] (1); S1 domain [IPR003029] (1); Nucleic acid-binding, OB-fold [IPR012340] (1)                                                                                                                                                              | scaffold_6_mRNA_2258.1          | -                           | -                               |
| GF0031127 | 1                            | 0                       | 0                           | 0 Hypothetical protein (1)                                                              |                                                                                                                                                                                                                                                                                                                                                                                                            |                                                                                                                                                                                                                                                                               | scaffold_6_mRNA_225.1           | -                           | -                               |
| GF0031126 | 1                            | 0                       | 0                           | 0 ATP-dependent RNA helicase (1)                                                        | ATP binding [GO:0005524 molecular_function] (1); nucleic acid binding [GO:0003676 molecular_function] (1)                                                                                                                                                                                                                                                                                                  | DEAD/DEAH box helicase domain [IPR011545] (1); P-loop containing nucleoside triphosphate hydrolase [IPR027417] (1); RNA helicase, DEAD-box type, Q motif [IPR014014] (1); Helicase superfamily 1/2, ATP-binding domain [IPR014001] (1)                                        | scaffold_6_mRNA_2245.1          | -                           | -                               |
| GF0031125 | 1                            | 0                       | 0                           | 0 Hypothetical protein (1)                                                              |                                                                                                                                                                                                                                                                                                                                                                                                            |                                                                                                                                                                                                                                                                               | scaffold_6_mRNA_2244.1          | -                           | -                               |
| GF0031124 | 1                            | 0                       | 0                           | 0 Hypothetical protein (1)                                                              | phytochelatins biosynthetic process [GO:0046978 biological_process] (1); glutathione gamma-glutamylcysteinyltransferase activity [GO:0016756 molecular_function] (1); metal ion binding [GO:0040872 molecular_function] (1); response to metal ion [GO:0010038 biological_process] (1)                                                                                                                     | Phytochelatins synthase, C-terminal [IPR015407] (1)                                                                                                                                                                                                                           | scaffold_6_mRNA_2243.1          | -                           | -                               |
| GF0031123 | 1                            | 0                       | 0                           | 0 Hypothetical protein (1)                                                              |                                                                                                                                                                                                                                                                                                                                                                                                            | Protein kinase-like domain [IPR011009] (1)                                                                                                                                                                                                                                    | scaffold_6_mRNA_224.1           | -                           | -                               |
| GF0031122 | 1                            | 0                       | 0                           | 0 Hypothetical protein (1)                                                              |                                                                                                                                                                                                                                                                                                                                                                                                            |                                                                                                                                                                                                                                                                               | scaffold_6_mRNA_2239.1          | -                           | -                               |
| GF0031121 | 1                            | 0                       | 0                           | 0 Hypothetical protein (1)                                                              | proteolysis [GO:0006508 biological_process] (1); cysteine-type peptidase activity [GO:0008234 molecular_function] (1)                                                                                                                                                                                                                                                                                      | Upl1 protease family, C-terminal catalytic domain [IPR003653] (1)                                                                                                                                                                                                             | scaffold_6_mRNA_223.1           | -                           | -                               |
| GF0031120 | 1                            | 0                       | 0                           | 0 Serine/threonine-protein kinase PBS1 (1)                                              | ATP binding [GO:0005524 molecular_function] (1); protein kinase activity [GO:0004672 molecular_function] (1); protein phosphorylation [GO:0006468 biological_process] (1)                                                                                                                                                                                                                                  | Serine-threonine/tyrosine-protein kinase, catalytic domain [IPR001245] (1); Protein kinase, ATP binding site [IPR017441] (1); Protein kinase-like domain [IPR011009] (1); Protein kinase domain [IPR000719] (1)                                                               | scaffold_6_mRNA_2228.1          | -                           | -                               |
| GF0031119 | 1                            | 0                       | 0                           | 0 Hypothetical protein (1)                                                              |                                                                                                                                                                                                                                                                                                                                                                                                            | Viral movement protein [IPR028919] (1)                                                                                                                                                                                                                                        | scaffold_6_mRNA_220.1           | -                           | -                               |
| GF0031118 | 1                            | 0                       | 0                           | 0 Hypothetical protein (1)                                                              |                                                                                                                                                                                                                                                                                                                                                                                                            |                                                                                                                                                                                                                                                                               | scaffold_6_mRNA_22.1            | -                           | -                               |
| GF0031117 | 1                            | 0                       | 0                           | 0 Basic 7S globulin, putative (1)                                                       | proteolysis [GO:0006508 biological_process] (1); aspartic-type endopeptidase activity [GO:0004190 molecular_function] (1)                                                                                                                                                                                                                                                                                  | Aspartic peptidase A1 family [IPR001461] (1); Xylanase inhibitor, N-terminal [IPR032861] (1); Aspartic peptidase domain [IPR02109] (1)                                                                                                                                        | scaffold_6_mRNA_2197.1          | -                           | -                               |
| GF0031116 | 1                            | 0                       | 0                           | 0 Hypothetical protein (1)                                                              |                                                                                                                                                                                                                                                                                                                                                                                                            |                                                                                                                                                                                                                                                                               | scaffold_6_mRNA_2195.1          | -                           | -                               |
| GF0031115 | 1                            | 0                       | 0                           | 0 Diaminohydroxyphosphoribosylamoylmidine deaminase (1)                                 | diaminohydroxyphosphoribosylamoylmidine deaminase activity [GO:0008835 molecular_function] (1); oxidation-reduction process [GO:0055114 biological_process] (1); hydrolase activity [GO:0016787 molecular_function] (1); catalytic activity [GO:0003824 molecular_function] (1); riboflavin biosynthetic process [GO:0009231 biological_process] (1); zinc ion binding [GO:0008270 molecular_function] (1) | Cytidine deaminase-like [IPR016193] (1); Riboflavin biosynthesis protein RibD [IPR004794] (1); Cytidine and deoxycytidylate deaminases, zinc-binding [IPR021251] (1); Dihydrofolate reductase-like domain [IPR024072] (1); APOBEC/CMP deaminase, zinc-binding [IPR016192] (1) | scaffold_6_mRNA_2184.1          | -                           | -                               |
| GF0031114 | 1                            | 0                       | 0                           | 0 Putative polyprotein (Aspartic proteinase, reverse transcriptase, ribonuclease H) (1) | aspartic-type endopeptidase activity [GO:0004190 molecular_function] (1); proteolysis [GO:0006508 biological_process] (1)                                                                                                                                                                                                                                                                                  | Aspartic peptidase domain [IPR021109] (1); Peptidase A2A, retroviral, catalytic [IPR001995] (1); Aspartic peptidase, active site [IPR001969] (1); Reverse transcriptase domain [IPR004477] (1); Retropepsin [IPR01806] (1)                                                    | scaffold_6_mRNA_218.1           | -                           | -                               |
| GF0031113 | 1                            | 0                       | 0                           | 0 Hypothetical protein (1)                                                              | transcription, DNA-templated [GO:0006351 biological_process] (1)                                                                                                                                                                                                                                                                                                                                           | Transcription elongation factor S-II, central domain [IPR003618] (1)                                                                                                                                                                                                          | scaffold_6_mRNA_2170.1          | -                           | -                               |
| GF0031112 | 1                            | 0                       | 0                           | 0 Hypothetical protein (1)                                                              | transcription, DNA-templated [GO:0006351 biological_process] (1)                                                                                                                                                                                                                                                                                                                                           | Transcription elongation factor S-II, central domain [IPR003618] (1)                                                                                                                                                                                                          | scaffold_6_mRNA_2169.1          | -                           | -                               |
| GF0031111 | 1                            | 0                       | 0                           | 0 Hypothetical protein (1)                                                              |                                                                                                                                                                                                                                                                                                                                                                                                            | Sugar phosphate transporter domain [IPR004853] (1)                                                                                                                                                                                                                            | scaffold_6_mRNA_2167.1          | -                           | -                               |
| GF0031110 | 1                            | 0                       | 0                           | 0 Hypothetical protein (1)                                                              | transcription, DNA-templated [GO:0006351 biological_process] (1)                                                                                                                                                                                                                                                                                                                                           | Transcription elongation factor S-II, central domain [IPR003618] (1)                                                                                                                                                                                                          | scaffold_6_mRNA_2166.1          | -                           | -                               |
| GF0031109 | 1                            | 0                       | 0                           | 0 Hypothetical protein (1)                                                              | transcription, DNA-templated [GO:0006351 biological_process] (1)                                                                                                                                                                                                                                                                                                                                           | Transcription elongation factor S-II, central domain [IPR003618] (1)                                                                                                                                                                                                          | scaffold_6_mRNA_2164.1          | -                           | -                               |
| GF0031108 | 1                            | 0                       | 0                           | 0 Hypothetical protein (1)                                                              |                                                                                                                                                                                                                                                                                                                                                                                                            |                                                                                                                                                                                                                                                                               | scaffold_6_mRNA_2163.1          | -                           | -                               |
| GF0031107 | 1                            | 0                       | 0                           | 0 Hypothetical protein (1)                                                              | transcription, DNA-templated [GO:0006351 biological_process] (1)                                                                                                                                                                                                                                                                                                                                           | Transcription elongation factor S-II, central domain [IPR003618] (1)                                                                                                                                                                                                          | scaffold_6_mRNA_2162.1          | -                           | -                               |
| GF0031106 | 1                            | 0                       | 0                           | 0 Hypothetical protein (1)                                                              | zinc ion binding [GO:0008270 molecular_function] (1); nucleic acid binding [GO:0003676 molecular_function] (1)                                                                                                                                                                                                                                                                                             | Zinc finger, CCHC-type [IPR001878] (1)                                                                                                                                                                                                                                        | scaffold_6_mRNA_216.1           | -                           | -                               |
| GF0031105 | 1                            | 0                       | 0                           | 0 Hypothetical protein (1)                                                              |                                                                                                                                                                                                                                                                                                                                                                                                            | Reverse transcriptase domain [IPR004477] (1)                                                                                                                                                                                                                                  | scaffold_6_mRNA_215.1           | -                           | -                               |
| GF0031104 | 1                            | 0                       | 0                           | 0 Hybrid proline-rich protein (1)                                                       |                                                                                                                                                                                                                                                                                                                                                                                                            | Hydrophobic seed protein [IPR027923] (1); Bifunctional inhibitor/plant lipid transfer protein/seed storage helical domain [IPR016140] (1)                                                                                                                                     | scaffold_6_mRNA_2148.1          | -                           | -                               |
| GF0031103 | 1                            | 0                       | 0                           | 0 Hypothetical protein (1)                                                              |                                                                                                                                                                                                                                                                                                                                                                                                            |                                                                                                                                                                                                                                                                               | scaffold_6_mRNA_2147.1          | -                           | -                               |
| GF0031102 | 1                            | 0                       | 0                           | 0 Hypothetical protein (1)                                                              |                                                                                                                                                                                                                                                                                                                                                                                                            | Hydrophobic seed protein [IPR027923] (1); Bifunctional inhibitor/plant lipid transfer protein/seed storage helical domain [IPR016140] (1)                                                                                                                                     | scaffold_6_mRNA_2146.2          | -                           | -                               |
| GF0031101 | 1                            | 0                       | 0                           | 0 Hypothetical protein (1)                                                              |                                                                                                                                                                                                                                                                                                                                                                                                            | Bifunctional inhibitor/plant lipid transfer protein/seed storage helical domain [IPR016140] (1); Hydrophobic seed protein [IPR027923] (1)                                                                                                                                     | scaffold_6_mRNA_2144.1          | -                           | -                               |
| GF0031100 | 1                            | 0                       | 0                           | 0 Hypothetical protein (1)                                                              |                                                                                                                                                                                                                                                                                                                                                                                                            |                                                                                                                                                                                                                                                                               | scaffold_6_mRNA_2140.1          | -                           | -                               |
| GF0031099 | 1                            | 0                       | 0                           | 0 60S ribosomal protein L27 (1)                                                         | ribosome [GO:0005840 cellular_component] (1); translation [GO:0006412 biological_process] (1); intracellular [GO:0005622 cellular_component] (1); structural constituent of ribosome [GO:0003735 molecular_function] (1)                                                                                                                                                                                   | Translation protein SH3-like domain [IPR008991] (1); Ribosomal protein L27c, conserved site [IPR032625] (1); Ribosomal protein L27e [IPR001141] (1); Ribosomal protein L2 domain 2 [IPR014722] (1)                                                                            | scaffold_6_mRNA_2125.1          | -                           | -                               |
| GF0031098 | 1                            | 0                       | 0                           | 0 Hypothetical protein (1)                                                              |                                                                                                                                                                                                                                                                                                                                                                                                            |                                                                                                                                                                                                                                                                               | scaffold_6_mRNA_2113.1          | -                           | -                               |
| GF0031097 | 1                            | 0                       | 0                           | 0 Hypothetical protein (1)                                                              | metabolic process [GO:0008152 biological_process] (1); catalytic activity [GO:0003824 molecular_function] (1); protein kinase activity [GO:0004672 molecular_function] (1); protein phosphorylation [GO:0006468 biological_process] (1)                                                                                                                                                                    | AMP-binding enzyme C-terminal domain [IPR025110] (1); Serine-threonine/tyrosine-protein kinase, catalytic domain [IPR001245] (1); AMP-dependent synthetase/ligase [IPR000873] (1); Protein kinase-like domain [IPR011009] (1)                                                 | scaffold_6_mRNA_2111.1          | -                           | -                               |
| GF0031096 | 1                            | 0                       | 0                           | 0 Hypothetical protein (1)                                                              | metal ion binding [GO:0046872 molecular_function] (1); metal ion transport [GO:0030001 biological_process] (1)                                                                                                                                                                                                                                                                                             | Heavy metal-associated domain, HMA [IPR006121] (1)                                                                                                                                                                                                                            | scaffold_6_mRNA_210.1           | -                           | -                               |
| GF0031094 | 1                            | 0                       | 0                           | 0 Hypothetical protein (1)                                                              |                                                                                                                                                                                                                                                                                                                                                                                                            | FBP domain [IPR006566] (1)                                                                                                                                                                                                                                                    | scaffold_6_mRNA_2088.1          | -                           | -                               |
| GF0031093 | 1                            | 0                       | 0                           | 0 Hypothetical protein (1)                                                              |                                                                                                                                                                                                                                                                                                                                                                                                            | Rossmann-like alpha/beta/alpha sandwich fold [IPR014729] (1)                                                                                                                                                                                                                  | scaffold_6_mRNA_2073.1          | -                           | -                               |
| GF0031092 | 1                            | 0                       | 0                           | 0 Hypothetical protein (1)                                                              |                                                                                                                                                                                                                                                                                                                                                                                                            | Viral movement protein [IPR028919] (1)                                                                                                                                                                                                                                        | scaffold_6_mRNA_207.1           | -                           | -                               |
| GF0031091 | 1                            | 0                       | 0                           | 0 Hypothetical protein (1)                                                              |                                                                                                                                                                                                                                                                                                                                                                                                            |                                                                                                                                                                                                                                                                               | scaffold_6_mRNA_205.1           | -                           | -                               |

| ID        | Num. in <i>C. caryophyllae</i> | Num. in <i>C. uchiha</i> | Num. in <i>P. trifoliata</i> | Note                                                                             | GO                                                                                                                                                                                                                                           | InterPro                                                                                                                                                                                                                                                                                                                                                                                                                                                 | Members in <i>C. caryophyllae</i> | Members in <i>C. uchiha</i> | Members in <i>P. trifoliata</i> |
|-----------|--------------------------------|--------------------------|------------------------------|----------------------------------------------------------------------------------|----------------------------------------------------------------------------------------------------------------------------------------------------------------------------------------------------------------------------------------------|----------------------------------------------------------------------------------------------------------------------------------------------------------------------------------------------------------------------------------------------------------------------------------------------------------------------------------------------------------------------------------------------------------------------------------------------------------|-----------------------------------|-----------------------------|---------------------------------|
| GF0031090 | 1                              | 0                        | 0                            | 0 Hypothetical protein (1)                                                       |                                                                                                                                                                                                                                              | Protein of unknown function DUF1191 [IPR010605] (1)                                                                                                                                                                                                                                                                                                                                                                                                      | scaffold_6_mRNA_2048.1            | -                           | -                               |
| GF0031089 | 1                              | 0                        | 0                            | 0 Hypothetical protein (1)                                                       |                                                                                                                                                                                                                                              |                                                                                                                                                                                                                                                                                                                                                                                                                                                          | scaffold_6_mRNA_204.1             | -                           | -                               |
| GF0031088 | 1                              | 0                        | 0                            | Eukaryotic translation initiation factor 2 beta subunit, putative, expressed (1) | translational initiation [GO:0006413 biological_process] (1); translation initiation factor activity [GO:0003743 molecular_function] (1)                                                                                                     | Translation initiation factor IF2/IF5 [IPR02735] (1); Translation initiation factor IF2/IF5, zinc-binding [IPR016190] (1); Translation initiation factor IF2/IF5, N-terminal [IPR016189] (1)                                                                                                                                                                                                                                                             | scaffold_6_mRNA_2033.1            | -                           | -                               |
| GF0031087 | 1                              | 0                        | 0                            | 0 Hypothetical protein (1)                                                       |                                                                                                                                                                                                                                              | Leucine-rich repeat domain, L domain-like [IPR032675] (1)                                                                                                                                                                                                                                                                                                                                                                                                | scaffold_6_mRNA_2031.1            | -                           | -                               |
| GF0031086 | 1                              | 0                        | 0                            | 0 Hypothetical protein (1)                                                       |                                                                                                                                                                                                                                              | LOG family [IPR031100] (1)                                                                                                                                                                                                                                                                                                                                                                                                                               | scaffold_6_mRNA_203.1             | -                           | -                               |
| GF0031085 | 1                              | 0                        | 0                            | 0 Hypothetical protein (1)                                                       | proteolysis [GO:0006508 biological_process] (1); aspartic-type endopeptidase activity [GO:0004190 molecular_function] (1)                                                                                                                    | Peptidase A2A, retroviral, catalytic [IPR001995] (1); Retropepsins [IPR018061] (1); Aspartic peptidase domain [IPR021109] (1)                                                                                                                                                                                                                                                                                                                            | scaffold_6_mRNA_202.1             | -                           | -                               |
| GF0031084 | 1                              | 0                        | 0                            | 0 Hypothetical protein (1)                                                       |                                                                                                                                                                                                                                              |                                                                                                                                                                                                                                                                                                                                                                                                                                                          | scaffold_6_mRNA_2006.1            | -                           | -                               |
| GF0031083 | 1                              | 0                        | 0                            | 0 Hypothetical protein (1)                                                       |                                                                                                                                                                                                                                              |                                                                                                                                                                                                                                                                                                                                                                                                                                                          | scaffold_6_mRNA_20.1              | -                           | -                               |
| GF0031082 | 1                              | 0                        | 0                            | 0 Hypothetical protein (1)                                                       | peroxidase activity [GO:0004601 molecular_function] (1); oxidation-reduction process [GO:0055114 biological_process] (1); response to oxidative stress [GO:0006979 biological_process] (1); heme binding [GO:0020037 molecular_function] (1) | Haem peroxidase [IPR010255] (1)                                                                                                                                                                                                                                                                                                                                                                                                                          | scaffold_6_mRNA_1982.1            | -                           | -                               |
| GF0031081 | 1                              | 0                        | 0                            | 0 Hypothetical protein (1)                                                       |                                                                                                                                                                                                                                              | Domain of unknown function DUF1985 [IPR015410] (1)                                                                                                                                                                                                                                                                                                                                                                                                       | scaffold_6_mRNA_1981.1            | -                           | -                               |
| GF0031080 | 1                              | 0                        | 0                            | 0 Hypothetical protein (1)                                                       |                                                                                                                                                                                                                                              |                                                                                                                                                                                                                                                                                                                                                                                                                                                          | scaffold_6_mRNA_198.1             | -                           | -                               |
| GF0031079 | 1                              | 0                        | 0                            | 0 Hypothetical protein (1)                                                       |                                                                                                                                                                                                                                              |                                                                                                                                                                                                                                                                                                                                                                                                                                                          | scaffold_6_mRNA_1977.1            | -                           | -                               |
| GF0031078 | 1                              | 0                        | 0                            | 0 Hypothetical protein (1)                                                       |                                                                                                                                                                                                                                              |                                                                                                                                                                                                                                                                                                                                                                                                                                                          | scaffold_6_mRNA_1969.1            | -                           | -                               |
| GF0031077 | 1                              | 0                        | 0                            | 0 Hypothetical protein (1)                                                       | aspartic-type endopeptidase activity [GO:0004190 molecular_function] (1); proteolysis [GO:0006508 biological_process] (1)                                                                                                                    | Viral movement protein [IPR028919] (1); Aspartic peptidase, active site [IPR001969] (1)                                                                                                                                                                                                                                                                                                                                                                  | scaffold_6_mRNA_196.1             | -                           | -                               |
| GF0031076 | 1                              | 0                        | 0                            | 0 Hypothetical protein (1)                                                       | nucleic acid binding [GO:0003676 molecular_function] (1)                                                                                                                                                                                     | Ribonuclease H-like domain [IPR012337] (1)                                                                                                                                                                                                                                                                                                                                                                                                               | scaffold_6_mRNA_194.1             | -                           | -                               |
| GF0031075 | 1                              | 0                        | 0                            | 0 Hypothetical protein (1)                                                       |                                                                                                                                                                                                                                              |                                                                                                                                                                                                                                                                                                                                                                                                                                                          | scaffold_6_mRNA_194.1             | -                           | -                               |
| GF0031074 | 1                              | 0                        | 0                            | 0 Macrophage migration inhibitory factor family protein (1)                      |                                                                                                                                                                                                                                              | Macrophage migration inhibitory factor superfamily [IPR014347] (1)                                                                                                                                                                                                                                                                                                                                                                                       | scaffold_6_mRNA_1936.2            | -                           | -                               |
| GF0031073 | 1                              | 0                        | 0                            | 0 Hypothetical protein (1)                                                       |                                                                                                                                                                                                                                              |                                                                                                                                                                                                                                                                                                                                                                                                                                                          | scaffold_6_mRNA_1929.1            | -                           | -                               |
| GF0031072 | 1                              | 0                        | 0                            | 0 Hypothetical protein (1)                                                       |                                                                                                                                                                                                                                              |                                                                                                                                                                                                                                                                                                                                                                                                                                                          | scaffold_6_mRNA_1925.1            | -                           | -                               |
| GF0031071 | 1                              | 0                        | 0                            | 0 Hypothetical protein (1)                                                       |                                                                                                                                                                                                                                              |                                                                                                                                                                                                                                                                                                                                                                                                                                                          | scaffold_6_mRNA_191.1             | -                           | -                               |
| GF0031070 | 1                              | 0                        | 0                            | 0 Hypothetical protein (1)                                                       |                                                                                                                                                                                                                                              |                                                                                                                                                                                                                                                                                                                                                                                                                                                          | scaffold_6_mRNA_1909.1            | -                           | -                               |
| GF0031069 | 1                              | 0                        | 0                            | 0 Verticillium wilt resistance-like protein (1)                                  | protein binding [GO:0005515 molecular_function] (1)                                                                                                                                                                                          | Leucine-rich repeat-containing N-terminal, plant-type [IPR013210] (1); Leucine-rich repeat [IPR001611] (1); Leucine-rich repeat, typical subtype [IPR03591] (1); Leucine-rich repeat domain, L domain-like [IPR032675] (1)                                                                                                                                                                                                                               | scaffold_6_mRNA_1891.1            | -                           | -                               |
| GF0031068 | 1                              | 0                        | 0                            | 0 Hypothetical protein (1)                                                       |                                                                                                                                                                                                                                              | Reverse transcriptase domain [IPR000477] (1); Endonuclease/exonuclease/phosphatase [IPR001355] (1)                                                                                                                                                                                                                                                                                                                                                       | scaffold_6_mRNA_1888.1            | -                           | -                               |
| GF0031067 | 1                              | 0                        | 0                            | 0 Hypothetical protein (1)                                                       |                                                                                                                                                                                                                                              | Retrotransposon gag domain [IPR005162] (1); Aspartic peptidase domain [IPR021109] (1)                                                                                                                                                                                                                                                                                                                                                                    | scaffold_6_mRNA_1886.1            | -                           | -                               |
| GF0031066 | 1                              | 0                        | 0                            | 0 Monosaccharide transport protein (1)                                           |                                                                                                                                                                                                                                              |                                                                                                                                                                                                                                                                                                                                                                                                                                                          | scaffold_6_mRNA_1885.1            | -                           | -                               |
| GF0031065 | 1                              | 0                        | 0                            | 0 Hypothetical protein (1)                                                       | protein serine/threonine kinase activity [GO:0004674 molecular_function] (1)                                                                                                                                                                 | S-locus receptor kinase, C-terminal [IPR021820] (1); Protein kinase-like domain [IPR011009] (1)                                                                                                                                                                                                                                                                                                                                                          | scaffold_6_mRNA_1874.1            | -                           | -                               |
| GF0031064 | 1                              | 0                        | 0                            | 0 Hypothetical protein (1)                                                       |                                                                                                                                                                                                                                              |                                                                                                                                                                                                                                                                                                                                                                                                                                                          | scaffold_6_mRNA_187.1             | -                           | -                               |
| GF0031063 | 1                              | 0                        | 0                            | 0 Hypothetical protein (1)                                                       |                                                                                                                                                                                                                                              | Reverse transcriptase, RNA-dependent DNA polymerase [IPR013103] (1)                                                                                                                                                                                                                                                                                                                                                                                      | scaffold_6_mRNA_185.1             | -                           | -                               |
| GF0031062 | 1                              | 0                        | 0                            | 0 Hypothetical protein (1)                                                       |                                                                                                                                                                                                                                              |                                                                                                                                                                                                                                                                                                                                                                                                                                                          | scaffold_6_mRNA_1847.1            | -                           | -                               |
| GF0031061 | 1                              | 0                        | 0                            | 0 Hypothetical protein (1)                                                       |                                                                                                                                                                                                                                              |                                                                                                                                                                                                                                                                                                                                                                                                                                                          | scaffold_6_mRNA_1846.1            | -                           | -                               |
| GF0031060 | 1                              | 0                        | 0                            | 0 Hypothetical protein (1)                                                       |                                                                                                                                                                                                                                              |                                                                                                                                                                                                                                                                                                                                                                                                                                                          | scaffold_6_mRNA_1845.1            | -                           | -                               |
| GF0031059 | 1                              | 0                        | 0                            | 0 Hypothetical protein (1)                                                       |                                                                                                                                                                                                                                              |                                                                                                                                                                                                                                                                                                                                                                                                                                                          | scaffold_6_mRNA_1844.1            | -                           | -                               |
| GF0031058 | 1                              | 0                        | 0                            | 0 Hypothetical protein (1)                                                       |                                                                                                                                                                                                                                              |                                                                                                                                                                                                                                                                                                                                                                                                                                                          | scaffold_6_mRNA_1842.1            | -                           | -                               |
| GF0031057 | 1                              | 0                        | 0                            | 0 Hypothetical protein (1)                                                       |                                                                                                                                                                                                                                              |                                                                                                                                                                                                                                                                                                                                                                                                                                                          | scaffold_6_mRNA_1833.1            | -                           | -                               |
| GF0031056 | 1                              | 0                        | 0                            | 0 Cytokinin riboside 5'-monophosphate phosphoribohydrolase (1)                   |                                                                                                                                                                                                                                              | Cytokinin riboside 5'-monophosphate phosphoribohydrolase LOG [IPR005269] (1); LOG family [IPR031100] (1)                                                                                                                                                                                                                                                                                                                                                 | scaffold_6_mRNA_1832.1            | -                           | -                               |
| GF0031055 | 1                              | 0                        | 0                            | 0 Hypothetical protein (1)                                                       |                                                                                                                                                                                                                                              | Gag-polyprotein of LTR copia-type [IPR029472] (1)                                                                                                                                                                                                                                                                                                                                                                                                        | scaffold_6_mRNA_1831.1            | -                           | -                               |
| GF0031054 | 1                              | 0                        | 0                            | 0 Hypothetical protein (1)                                                       |                                                                                                                                                                                                                                              |                                                                                                                                                                                                                                                                                                                                                                                                                                                          | scaffold_6_mRNA_1828.1            | -                           | -                               |
| GF0031053 | 1                              | 0                        | 0                            | 0 Mutator-like transposase (1)                                                   |                                                                                                                                                                                                                                              | MULE transposase domain [IPR018289] (1); Transposase, MuDR, plant [IPR004332] (1)                                                                                                                                                                                                                                                                                                                                                                        | scaffold_6_mRNA_1821.1            | -                           | -                               |
| GF0031052 | 1                              | 0                        | 0                            | 0 Hypothetical protein (1)                                                       | proteolysis [GO:0006508 biological_process] (1); cysteine-type peptidase activity [GO:0008234 molecular_function] (1)                                                                                                                        | Domain of unknown function DUF1985 [IPR015410] (1); Ulp1 protease family, C-terminal catalytic domain [IPR003653] (1)                                                                                                                                                                                                                                                                                                                                    | scaffold_6_mRNA_1820.1            | -                           | -                               |
| GF0031051 | 1                              | 0                        | 0                            | 0 Hypothetical protein (1)                                                       |                                                                                                                                                                                                                                              |                                                                                                                                                                                                                                                                                                                                                                                                                                                          | scaffold_6_mRNA_1809.1            | -                           | -                               |
| GF0031050 | 1                              | 0                        | 0                            | 0 RNA-directed DNA polymerase (Reverse transcriptase) (1)                        |                                                                                                                                                                                                                                              | Reverse transcriptase domain [IPR000477] (1)                                                                                                                                                                                                                                                                                                                                                                                                             | scaffold_6_mRNA_1808.1            | -                           | -                               |
| GF0031049 | 1                              | 0                        | 0                            | 0 Hypothetical protein (1)                                                       |                                                                                                                                                                                                                                              |                                                                                                                                                                                                                                                                                                                                                                                                                                                          | scaffold_6_mRNA_1797.1            | -                           | -                               |
| GF0031048 | 1                              | 0                        | 0                            | 0 Hypothetical protein (1)                                                       |                                                                                                                                                                                                                                              |                                                                                                                                                                                                                                                                                                                                                                                                                                                          | scaffold_6_mRNA_179.1             | -                           | -                               |
| GF0031047 | 1                              | 0                        | 0                            | 0 Monosaccharide transport protein (1)                                           |                                                                                                                                                                                                                                              |                                                                                                                                                                                                                                                                                                                                                                                                                                                          | scaffold_6_mRNA_1788.1            | -                           | -                               |
| GF0031046 | 1                              | 0                        | 0                            | 0 Hypothetical protein (1)                                                       |                                                                                                                                                                                                                                              |                                                                                                                                                                                                                                                                                                                                                                                                                                                          | scaffold_6_mRNA_1787.1            | -                           | -                               |
| GF0031045 | 1                              | 0                        | 0                            | 0 Hypothetical protein (1)                                                       | ATP binding [GO:000524 molecular_function] (1); protein phosphorylation [GO:0006468 biological_process] (1); protein kinase activity [GO:0004672 molecular_function] (1)                                                                     | Protein kinase domain [IPR000719] (1); Protein kinase-like domain [IPR011009] (1)                                                                                                                                                                                                                                                                                                                                                                        | scaffold_6_mRNA_1785.1            | -                           | -                               |
| GF0031044 | 1                              | 0                        | 0                            | 0 Hypothetical protein (1)                                                       | protein dimerization activity [GO:0046983 molecular_function] (1); nucleic acid binding [GO:0003676 molecular_function] (1)                                                                                                                  | HAT, C-terminal dimerisation domain [IPR008986] (1); Ribonuclease H-like domain [IPR012337] (1)                                                                                                                                                                                                                                                                                                                                                          | scaffold_6_mRNA_1784.1            | -                           | -                               |
| GF0031043 | 1                              | 0                        | 0                            | 0 Hypothetical protein (1)                                                       |                                                                                                                                                                                                                                              |                                                                                                                                                                                                                                                                                                                                                                                                                                                          | scaffold_6_mRNA_1780.1            | -                           | -                               |
| GF0031042 | 1                              | 0                        | 0                            | 0 Hypothetical protein (1)                                                       |                                                                                                                                                                                                                                              | Leucine-rich repeat domain, L domain-like [IPR032675] (1)                                                                                                                                                                                                                                                                                                                                                                                                | scaffold_6_mRNA_1777.1            | -                           | -                               |
| GF0031041 | 1                              | 0                        | 0                            | 0 LRR receptor-like kinase (1)                                                   | protein binding [GO:0005515 molecular_function] (1); ATP binding [GO:000524 molecular_function] (3); protein phosphorylation [GO:0006468 biological_process] (1); protein kinase activity [GO:0004672 molecular_function] (1)                | Protein kinase domain [IPR000719] (1); Leucine-rich repeat domain, L domain-like [IPR032675] (1); Protein kinase-like domain [IPR011009] (1); Leucine-rich repeat, typical subtype [IPR003591] (1); Serine-threonine/tyrosine-protein kinase, catalytic domain [IPR001245] (1); Leucine-rich repeat-containing N-terminal, plant-type [IPR013210] (1); Serine/threonine-protein kinase, active site [IPR008271] (1); Leucine-rich repeat [IPR001611] (1) | scaffold_6_mRNA_1775.1            | -                           | -                               |
| GF0031040 | 1                              | 0                        | 0                            | 0 Hypothetical protein (1)                                                       | nucleic acid binding [GO:0003676 molecular_function] (1); regulation of transcription, DNA-templated [GO:0006355 biological_process] (1)                                                                                                     | Carfavirus nucleic acid-binding protein [IPR002568] (1)                                                                                                                                                                                                                                                                                                                                                                                                  | scaffold_6_mRNA_1774.1            | -                           | -                               |
| GF0031039 | 1                              | 0                        | 0                            | 0 Hypothetical protein (1)                                                       |                                                                                                                                                                                                                                              |                                                                                                                                                                                                                                                                                                                                                                                                                                                          | scaffold_6_mRNA_1773.1            | -                           | -                               |
| GF0031038 | 1                              | 0                        | 0                            | 0 Cytokinin riboside 5'-monophosphate phosphoribohydrolase (1)                   |                                                                                                                                                                                                                                              | LOG family [IPR031100] (1)                                                                                                                                                                                                                                                                                                                                                                                                                               | scaffold_6_mRNA_1772.1            | -                           | -                               |
| GF0031037 | 1                              | 0                        | 0                            | 0 Hypothetical protein (1)                                                       |                                                                                                                                                                                                                                              | Reverse transcriptase domain [IPR000477] (1)                                                                                                                                                                                                                                                                                                                                                                                                             | scaffold_6_mRNA_1768.1            | -                           | -                               |
| GF0031036 | 1                              | 0                        | 0                            | 0 Hypothetical protein (1)                                                       |                                                                                                                                                                                                                                              |                                                                                                                                                                                                                                                                                                                                                                                                                                                          | scaffold_6_mRNA_1762.1            | -                           | -                               |
| GF0031035 | 1                              | 0                        | 0                            | 0 Hypothetical protein (1)                                                       |                                                                                                                                                                                                                                              |                                                                                                                                                                                                                                                                                                                                                                                                                                                          | scaffold_6_mRNA_1758.1            | -                           | -                               |
| GF0031034 | 1                              | 0                        | 0                            | 0 Hypothetical protein (1)                                                       |                                                                                                                                                                                                                                              |                                                                                                                                                                                                                                                                                                                                                                                                                                                          | scaffold_6_mRNA_1757.1            | -                           | -                               |
| GF0031033 | 1                              | 0                        | 0                            | 0 Potassium channel tetramerization domain-containing protein (1)                | protein binding [GO:0005515 molecular_function] (1); protein homooligomerization [GO:0051260 biological_process] (1)                                                                                                                         | Six-bladed beta-propeller, TollB-like [IPR011042] (1); WD40/VYIN repeat-like-containing domain [IPR015943] (1); Potassium channel tetramerisation-type BTB domain [IPR003131] (1); WD40-repeat-containing domain [IPR017986] (1); SKP1/BTB/POZ domain [IPR011333] (1)                                                                                                                                                                                    | scaffold_6_mRNA_1754.1            | -                           | -                               |
| GF0031032 | 1                              | 0                        | 0                            | 0 Hypothetical protein (1)                                                       |                                                                                                                                                                                                                                              |                                                                                                                                                                                                                                                                                                                                                                                                                                                          | scaffold_6_mRNA_1753.1            | -                           | -                               |
| GF0031031 | 1                              | 0                        | 0                            | 0 Hypothetical protein (1)                                                       | oxidoreductase activity, acting on the aldehyde or oxo group of donors, NAD or NADP as acceptor [GO:0016620 molecular_function] (1); oxidation-reduction process [GO:0055114 biological_process] (1)                                         | Glyceraldehyde/Erythrose phosphate dehydrogenase family [IPR020831] (1)                                                                                                                                                                                                                                                                                                                                                                                  | scaffold_6_mRNA_1751.1            | -                           | -                               |

| ID        | Num in <i>C. clementiae</i> | Num in <i>C. uchiha</i> | Num in <i>P. trifoliata</i> | Note                                                             | GO                                                                                                                                                                                                                                                                                                                                                                      | InterPro                                                                                                                                                                                                                                                                                                                                                                                                                    | Members in <i>C. clementiae</i> | Members in <i>C. uchiha</i> | Members in <i>P. trifoliata</i> |
|-----------|-----------------------------|-------------------------|-----------------------------|------------------------------------------------------------------|-------------------------------------------------------------------------------------------------------------------------------------------------------------------------------------------------------------------------------------------------------------------------------------------------------------------------------------------------------------------------|-----------------------------------------------------------------------------------------------------------------------------------------------------------------------------------------------------------------------------------------------------------------------------------------------------------------------------------------------------------------------------------------------------------------------------|---------------------------------|-----------------------------|---------------------------------|
| GF0031030 | 1                           | 0                       | 0                           | Putative peptidase transporter, Protein NRT1; PTR FAMILY 8.3 (1) | oligopeptide transport [GO:0006857 biological_process] (1); transporter activity [GO:0005215 molecular_function] (1); transport [GO:0006810 biological_process] (1); membrane [GO:0016020 cellular_component] (1)                                                                                                                                                       | PTR2 family proto/oligopeptide symporter, conserved site [IPR018456] (1); Major facilitator superfamily domain [IPR020846] (1); Proton-dependent oligopeptide transporter family [IPR00109] (1)                                                                                                                                                                                                                             | scaffold_6_mRNA_1741.1          | -                           | -                               |
| GF0031029 | 1                           | 0                       | 0                           | 0 Hypothetical protein (1)                                       |                                                                                                                                                                                                                                                                                                                                                                         |                                                                                                                                                                                                                                                                                                                                                                                                                             | scaffold_6_mRNA_1738.1          | -                           | -                               |
| GF0031028 | 1                           | 0                       | 0                           | 0 Hypothetical protein (1)                                       |                                                                                                                                                                                                                                                                                                                                                                         |                                                                                                                                                                                                                                                                                                                                                                                                                             | scaffold_6_mRNA_1735.1          | -                           | -                               |
| GF0031027 | 1                           | 0                       | 0                           | 0 Hypothetical protein (1)                                       |                                                                                                                                                                                                                                                                                                                                                                         |                                                                                                                                                                                                                                                                                                                                                                                                                             | scaffold_6_mRNA_1731.1          | -                           | -                               |
| GF0031026 | 1                           | 0                       | 0                           | 0 Hypothetical protein (1)                                       |                                                                                                                                                                                                                                                                                                                                                                         |                                                                                                                                                                                                                                                                                                                                                                                                                             | scaffold_6_mRNA_1729.1          | -                           | -                               |
| GF0031025 | 1                           | 0                       | 0                           | 0 Hypothetical protein (1)                                       |                                                                                                                                                                                                                                                                                                                                                                         |                                                                                                                                                                                                                                                                                                                                                                                                                             | scaffold_6_mRNA_1728.1          | -                           | -                               |
| GF0031024 | 1                           | 0                       | 0                           | 0 Hypothetical protein (1)                                       |                                                                                                                                                                                                                                                                                                                                                                         |                                                                                                                                                                                                                                                                                                                                                                                                                             | scaffold_6_mRNA_1727.1          | -                           | -                               |
| GF0031023 | 1                           | 0                       | 0                           | 0 Hypothetical protein (1)                                       |                                                                                                                                                                                                                                                                                                                                                                         |                                                                                                                                                                                                                                                                                                                                                                                                                             | scaffold_6_mRNA_1726.1          | -                           | -                               |
| GF0031022 | 1                           | 0                       | 0                           | 0 Hypothetical protein (1)                                       |                                                                                                                                                                                                                                                                                                                                                                         |                                                                                                                                                                                                                                                                                                                                                                                                                             | scaffold_6_mRNA_1721.1          | -                           | -                               |
| GF0031021 | 1                           | 0                       | 0                           | 0 Hypothetical protein (1)                                       |                                                                                                                                                                                                                                                                                                                                                                         |                                                                                                                                                                                                                                                                                                                                                                                                                             | scaffold_6_mRNA_1720.1          | -                           | -                               |
| GF0031020 | 1                           | 0                       | 0                           | 0 Hypothetical protein (1)                                       |                                                                                                                                                                                                                                                                                                                                                                         |                                                                                                                                                                                                                                                                                                                                                                                                                             | scaffold_6_mRNA_1719.1          | -                           | -                               |
| GF0031019 | 1                           | 0                       | 0                           | 0 Hypothetical protein (1)                                       |                                                                                                                                                                                                                                                                                                                                                                         | LOG family [IPR031100] (1)                                                                                                                                                                                                                                                                                                                                                                                                  | scaffold_6_mRNA_1718.1          | -                           | -                               |
| GF0031018 | 1                           | 0                       | 0                           | 0 Hypothetical protein (1)                                       |                                                                                                                                                                                                                                                                                                                                                                         |                                                                                                                                                                                                                                                                                                                                                                                                                             | scaffold_6_mRNA_1717.1          | -                           | -                               |
| GF0031017 | 1                           | 0                       | 0                           | 0 Hypothetical protein (1)                                       |                                                                                                                                                                                                                                                                                                                                                                         | Retrontransposon gsg domain [IPR05162] (1)                                                                                                                                                                                                                                                                                                                                                                                  | scaffold_6_mRNA_1699.1          | -                           | -                               |
| GF0031016 | 1                           | 0                       | 0                           | 0 Hypothetical protein (1)                                       |                                                                                                                                                                                                                                                                                                                                                                         |                                                                                                                                                                                                                                                                                                                                                                                                                             | scaffold_6_mRNA_1698.1          | -                           | -                               |
| GF0031015 | 1                           | 0                       | 0                           | 0 Hypothetical protein (1)                                       |                                                                                                                                                                                                                                                                                                                                                                         |                                                                                                                                                                                                                                                                                                                                                                                                                             | scaffold_6_mRNA_1691.1          | -                           | -                               |
| GF0031014 | 1                           | 0                       | 0                           | 0 Hypothetical protein (1)                                       |                                                                                                                                                                                                                                                                                                                                                                         |                                                                                                                                                                                                                                                                                                                                                                                                                             | scaffold_6_mRNA_1681.1          | -                           | -                               |
| GF0031013 | 1                           | 0                       | 0                           | 0 Hypothetical protein (1)                                       |                                                                                                                                                                                                                                                                                                                                                                         |                                                                                                                                                                                                                                                                                                                                                                                                                             | scaffold_6_mRNA_1652.1          | -                           | -                               |
| GF0031012 | 1                           | 0                       | 0                           | 0 Hypothetical protein (1)                                       |                                                                                                                                                                                                                                                                                                                                                                         |                                                                                                                                                                                                                                                                                                                                                                                                                             | scaffold_6_mRNA_165.1           | -                           | -                               |
| GF0031011 | 1                           | 0                       | 0                           | 0 Hypothetical protein (1)                                       | nucleic acid binding [GO:0003676 molecular_function] (1)                                                                                                                                                                                                                                                                                                                | Ribonuclease H-like domain [IPR012337] (1); Reverse transcriptase zinc-binding domain [IPR026901] (1); Endonuclease/exonuclease/phosphatase [IPR005135] (1)                                                                                                                                                                                                                                                                 | scaffold_6_mRNA_1640.1          | -                           | -                               |
| GF0031010 | 1                           | 0                       | 0                           | 0 Hypothetical protein (1)                                       |                                                                                                                                                                                                                                                                                                                                                                         |                                                                                                                                                                                                                                                                                                                                                                                                                             | scaffold_6_mRNA_1630.1          | -                           | -                               |
| GF0031009 | 1                           | 0                       | 0                           | 0 Hypothetical protein (1)                                       |                                                                                                                                                                                                                                                                                                                                                                         |                                                                                                                                                                                                                                                                                                                                                                                                                             | scaffold_6_mRNA_163.1           | -                           | -                               |
| GF0031008 | 1                           | 0                       | 0                           | Putative receptor protein kinase ZmPK1 (1)                       | protein binding [GO:0005515 molecular_function] (1); ATP binding [GO:0005524 molecular_function] (1); protein kinase activity [GO:0004672 molecular_function] (1); protein serine/threonine kinase activity [GO:0004674 molecular_function] (1); recognition of pollen [GO:0048544 biological_process] (1); protein phosphorylation [GO:0006468 biological_process] (1) | Bull-type lectin domain [IPR001480] (1); PAN/Apple domain [IPR013699] (1); Protein kinase, ATP binding site [IPR017441] (1); Serine/threonine-protein kinase, active site [IPR008271] (1); S-kinase glycoprotein domain [IPR000858] (1); EGF-like domain [IPR00742] (1); Protein kinase-like domain [IPR011009] (1); S-receptor-like serine/threonine-protein kinase [IPR024171] (1); Protein kinase domain [IPR000719] (1) | scaffold_6_mRNA_1629.1          | -                           | -                               |
| GF0031007 | 1                           | 0                       | 0                           | 0 Hypothetical protein (1)                                       |                                                                                                                                                                                                                                                                                                                                                                         |                                                                                                                                                                                                                                                                                                                                                                                                                             | scaffold_6_mRNA_1628.1          | -                           | -                               |
| GF0031006 | 1                           | 0                       | 0                           | 0 Hypothetical protein (1)                                       |                                                                                                                                                                                                                                                                                                                                                                         |                                                                                                                                                                                                                                                                                                                                                                                                                             | scaffold_6_mRNA_1624.1          | -                           | -                               |
| GF0031005 | 1                           | 0                       | 0                           | 0 Hypothetical protein (1)                                       |                                                                                                                                                                                                                                                                                                                                                                         |                                                                                                                                                                                                                                                                                                                                                                                                                             | scaffold_6_mRNA_1623.1          | -                           | -                               |
| GF0031004 | 1                           | 0                       | 0                           | 0 Hypothetical protein (1)                                       |                                                                                                                                                                                                                                                                                                                                                                         |                                                                                                                                                                                                                                                                                                                                                                                                                             | scaffold_6_mRNA_1617.1          | -                           | -                               |
| GF0031003 | 1                           | 0                       | 0                           | 0 Hypothetical protein (1)                                       |                                                                                                                                                                                                                                                                                                                                                                         |                                                                                                                                                                                                                                                                                                                                                                                                                             | scaffold_6_mRNA_1610.1          | -                           | -                               |
| GF0031002 | 1                           | 0                       | 0                           | 0 Hypothetical protein (1)                                       |                                                                                                                                                                                                                                                                                                                                                                         | Aspartic peptidase domain [IPR021109] (1)                                                                                                                                                                                                                                                                                                                                                                                   | scaffold_6_mRNA_1609.1          | -                           | -                               |
| GF0031001 | 1                           | 0                       | 0                           | 0 Hypothetical protein (1)                                       |                                                                                                                                                                                                                                                                                                                                                                         |                                                                                                                                                                                                                                                                                                                                                                                                                             | scaffold_6_mRNA_1608.1          | -                           | -                               |
| GF0031000 | 1                           | 0                       | 0                           | 0 Hypothetical protein (1)                                       | ATP binding [GO:0005524 molecular_function] (1); nucleic acid binding [GO:0003676 molecular_function] (1); protein kinase activity [GO:0004672 molecular_function] (1); protein phosphorylation [GO:0006468 biological_process] (1); zinc ion binding [GO:0008270 molecular_function] (1); RNA-DNA hybrid ribonuclease activity [GO:0004523 molecular_function] (1)     | Protein kinase domain [IPR000719] (1); Ribonuclease H-like domain [IPR012337] (1); Domain of unknown function DUF4283 [IPR025558] (1); Protein kinase-like domain [IPR011009] (1); Ribonuclease H domain [IPR002156] (1); Zinc finger, CTCF-type [IPR001878] (1)                                                                                                                                                            | scaffold_6_mRNA_1600.1          | -                           | -                               |
| GF0030999 | 1                           | 0                       | 0                           | 0 Hypothetical protein (1)                                       |                                                                                                                                                                                                                                                                                                                                                                         |                                                                                                                                                                                                                                                                                                                                                                                                                             | scaffold_6_mRNA_160.1           | -                           | -                               |
| GF0030998 | 1                           | 0                       | 0                           | 0 Hypothetical protein (1)                                       |                                                                                                                                                                                                                                                                                                                                                                         |                                                                                                                                                                                                                                                                                                                                                                                                                             | scaffold_6_mRNA_16.1            | -                           | -                               |
| GF0030997 | 1                           | 0                       | 0                           | Protein FAR1-RELATED SEQUENCE (1)                                | zinc ion binding [GO:0008270 molecular_function] (1); regulation of transcription, DNA-templated [GO:0006355 biological_process] (1)                                                                                                                                                                                                                                    | Zinc finger, SWIM-type [IPR007527] (1); MULE transposase domain [IPR018209] (1); Zinc finger, PMZ-type [IPR006564] (1); FAR1 DNA binding domain [IPR004330] (1); FHY3/FAR1 family [IPR031052] (1)                                                                                                                                                                                                                           | scaffold_6_mRNA_1597.1          | -                           | -                               |
| GF0030996 | 1                           | 0                       | 0                           | 0 Hypothetical protein (1)                                       |                                                                                                                                                                                                                                                                                                                                                                         | Reverse transcriptase, RNA-dependent DNA polymerase [IPR013103] (1)                                                                                                                                                                                                                                                                                                                                                         | scaffold_6_mRNA_1592.1          | -                           | -                               |
| GF0030995 | 1                           | 0                       | 0                           | Short chain alcohol dehydrogenase-like protein (1)               |                                                                                                                                                                                                                                                                                                                                                                         | Short-chain dehydrogenase/reductase SDR [IPR002347] (1); NAD(P)-binding domain [IPR016040] (1)                                                                                                                                                                                                                                                                                                                              | scaffold_6_mRNA_1591.1          | -                           | -                               |
| GF0030994 | 1                           | 0                       | 0                           | 0 Hypothetical protein (1)                                       |                                                                                                                                                                                                                                                                                                                                                                         |                                                                                                                                                                                                                                                                                                                                                                                                                             | scaffold_6_mRNA_1586.1          | -                           | -                               |
| GF0030993 | 1                           | 0                       | 0                           | 0 Hypothetical protein (1)                                       |                                                                                                                                                                                                                                                                                                                                                                         |                                                                                                                                                                                                                                                                                                                                                                                                                             | scaffold_6_mRNA_1583.1          | -                           | -                               |
| GF0030992 | 1                           | 0                       | 0                           | 0 Hypothetical protein (1)                                       |                                                                                                                                                                                                                                                                                                                                                                         |                                                                                                                                                                                                                                                                                                                                                                                                                             | scaffold_6_mRNA_1582.1          | -                           | -                               |
| GF0030991 | 1                           | 0                       | 0                           | 0 Monosaccharide transport protein (1)                           |                                                                                                                                                                                                                                                                                                                                                                         |                                                                                                                                                                                                                                                                                                                                                                                                                             | scaffold_6_mRNA_1580.1          | -                           | -                               |
| GF0030990 | 1                           | 0                       | 0                           | 0 Hypothetical protein (1)                                       |                                                                                                                                                                                                                                                                                                                                                                         |                                                                                                                                                                                                                                                                                                                                                                                                                             | scaffold_6_mRNA_1576.1          | -                           | -                               |
| GF0030989 | 1                           | 0                       | 0                           | 0 Hypothetical protein (1)                                       |                                                                                                                                                                                                                                                                                                                                                                         |                                                                                                                                                                                                                                                                                                                                                                                                                             | scaffold_6_mRNA_1573.1          | -                           | -                               |
| GF0030988 | 1                           | 0                       | 0                           | 0 Hypothetical protein (1)                                       | protein dimerization activity [GO:0046983 molecular_function] (1); nucleic acid binding [GO:0003676 molecular_function] (1)                                                                                                                                                                                                                                             | Ribonuclease H-like domain [IPR012337] (1); HAT, C-terminal dimerization domain [IPR008906] (1)                                                                                                                                                                                                                                                                                                                             | scaffold_6_mRNA_1565.1          | -                           | -                               |
| GF0030987 | 1                           | 0                       | 0                           | 0 Hypothetical protein (1)                                       |                                                                                                                                                                                                                                                                                                                                                                         |                                                                                                                                                                                                                                                                                                                                                                                                                             | scaffold_6_mRNA_1564.1          | -                           | -                               |
| GF0030986 | 1                           | 0                       | 0                           | 0 Hypothetical protein (1)                                       |                                                                                                                                                                                                                                                                                                                                                                         |                                                                                                                                                                                                                                                                                                                                                                                                                             | scaffold_6_mRNA_156.1           | -                           | -                               |
| GF0030985 | 1                           | 0                       | 0                           | 0 Cytokinin riboside 5'-monophosphate phosphoribohydrolase (1)   |                                                                                                                                                                                                                                                                                                                                                                         | LOG family [IPR031100] (1)                                                                                                                                                                                                                                                                                                                                                                                                  | scaffold_6_mRNA_1547.1          | -                           | -                               |
| GF0030984 | 1                           | 0                       | 0                           | 0 Hypothetical protein (1)                                       |                                                                                                                                                                                                                                                                                                                                                                         |                                                                                                                                                                                                                                                                                                                                                                                                                             | scaffold_6_mRNA_1546.1          | -                           | -                               |
| GF0030983 | 1                           | 0                       | 0                           | 0 Hypothetical protein (1)                                       |                                                                                                                                                                                                                                                                                                                                                                         |                                                                                                                                                                                                                                                                                                                                                                                                                             | scaffold_6_mRNA_1545.1          | -                           | -                               |
| GF0030982 | 1                           | 0                       | 0                           | 0 Hypothetical protein (1)                                       | zinc ion binding [GO:0008270 molecular_function] (1)                                                                                                                                                                                                                                                                                                                    | Zinc finger, SWIM-type [IPR007527] (1); Zinc finger, PMZ-type [IPR006564] (1)                                                                                                                                                                                                                                                                                                                                               | scaffold_6_mRNA_1544.1          | -                           | -                               |
| GF0030981 | 1                           | 0                       | 0                           | 0 Hypothetical protein (1)                                       |                                                                                                                                                                                                                                                                                                                                                                         |                                                                                                                                                                                                                                                                                                                                                                                                                             | scaffold_6_mRNA_1543.1          | -                           | -                               |
| GF0030980 | 1                           | 0                       | 0                           | Disease resistance protein (CC-NBS-LRR class) family protein (1) | ADP binding [GO:0043531 molecular_function] (1)                                                                                                                                                                                                                                                                                                                         | NB-ARC [IPR002182] (1); AAA+ ATPase domain [IPR003593] (1); P-loop containing nucleoside triphosphate hydrolase [IPR027417] (1); Leucine-rich repeat domain, L domain-like [IPR032675] (1); Winged helix-turn-helix DNA-binding domain [IPR011991] (1)                                                                                                                                                                      | scaffold_6_mRNA_154.1           | -                           | -                               |
| GF0030979 | 1                           | 0                       | 0                           | 0 Hypothetical protein (1)                                       |                                                                                                                                                                                                                                                                                                                                                                         | Amibolopsis retrontransposon Orf1 [IPR04312] (1)                                                                                                                                                                                                                                                                                                                                                                            | scaffold_6_mRNA_1532.1          | -                           | -                               |
| GF0030978 | 1                           | 0                       | 0                           | 0 Hypothetical protein (1)                                       |                                                                                                                                                                                                                                                                                                                                                                         |                                                                                                                                                                                                                                                                                                                                                                                                                             | scaffold_6_mRNA_153.1           | -                           | -                               |
| GF0030977 | 1                           | 0                       | 0                           | 0 Cytokinin riboside 5'-monophosphate phosphoribohydrolase (1)   |                                                                                                                                                                                                                                                                                                                                                                         | Cytokinin riboside 5'-monophosphate phosphoribohydrolase LOG [IPR005269] (1); LOG family [IPR031100] (1)                                                                                                                                                                                                                                                                                                                    | scaffold_6_mRNA_1527.1          | -                           | -                               |
| GF0030976 | 1                           | 0                       | 0                           | 0 Hypothetical protein (1)                                       |                                                                                                                                                                                                                                                                                                                                                                         |                                                                                                                                                                                                                                                                                                                                                                                                                             | scaffold_6_mRNA_1526.1          | -                           | -                               |
| GF0030975 | 1                           | 0                       | 0                           | 0 Hypothetical protein (1)                                       |                                                                                                                                                                                                                                                                                                                                                                         |                                                                                                                                                                                                                                                                                                                                                                                                                             | scaffold_6_mRNA_1524.1          | -                           | -                               |
| GF0030974 | 1                           | 0                       | 0                           | 0 Hypothetical protein (1)                                       |                                                                                                                                                                                                                                                                                                                                                                         |                                                                                                                                                                                                                                                                                                                                                                                                                             | scaffold_6_mRNA_1523.1          | -                           | -                               |
| GF0030973 | 1                           | 0                       | 0                           | 0 Hypothetical protein (1)                                       |                                                                                                                                                                                                                                                                                                                                                                         |                                                                                                                                                                                                                                                                                                                                                                                                                             | scaffold_6_mRNA_1522.1          | -                           | -                               |
| GF0030972 | 1                           | 0                       | 0                           | 0 Hypothetical protein (1)                                       | nucleic acid binding [GO:0003676 molecular_function] (1); protein dimerization activity [GO:0046983 molecular_function] (1)                                                                                                                                                                                                                                             | HAT, C-terminal dimerization domain [IPR008906] (1); Ribonuclease H-like domain [IPR012337] (1)                                                                                                                                                                                                                                                                                                                             | scaffold_6_mRNA_152.1           | -                           | -                               |
| GF0030971 | 1                           | 0                       | 0                           | 0 Hypothetical protein (1)                                       |                                                                                                                                                                                                                                                                                                                                                                         |                                                                                                                                                                                                                                                                                                                                                                                                                             | scaffold_6_mRNA_1515.1          | -                           | -                               |
| GF0030970 | 1                           | 0                       | 0                           | 0 Hypothetical protein (1)                                       | ADP binding [GO:0043531 molecular_function] (1)                                                                                                                                                                                                                                                                                                                         | P-loop containing nucleoside triphosphate hydrolase [IPR027417] (1); AAA+ ATPase domain [IPR003593] (1); NB-ARC [IPR002182] (1); Leucine-rich repeat domain, L domain-like [IPR032675] (1); Winged helix-turn-helix DNA-binding domain [IPR011991] (1)                                                                                                                                                                      | scaffold_6_mRNA_151.1           | -                           | -                               |
| GF0030969 | 1                           | 0                       | 0                           | 0 Hypothetical protein (1)                                       |                                                                                                                                                                                                                                                                                                                                                                         |                                                                                                                                                                                                                                                                                                                                                                                                                             | scaffold_6_mRNA_1508.1          | -                           | -                               |
| GF0030968 | 1                           | 0                       | 0                           | 0 Hypothetical protein (1)                                       |                                                                                                                                                                                                                                                                                                                                                                         |                                                                                                                                                                                                                                                                                                                                                                                                                             | scaffold_6_mRNA_1507.1          | -                           | -                               |
| GF0030967 | 1                           | 0                       | 0                           | 0 Hypothetical protein (1)                                       |                                                                                                                                                                                                                                                                                                                                                                         |                                                                                                                                                                                                                                                                                                                                                                                                                             | scaffold_6_mRNA_1506.1          | -                           | -                               |
| GF0030966 | 1                           | 0                       | 0                           | 0 Hypothetical protein (1)                                       |                                                                                                                                                                                                                                                                                                                                                                         |                                                                                                                                                                                                                                                                                                                                                                                                                             | scaffold_6_mRNA_1503.1          | -                           | -                               |
| GF0030965 | 1                           | 0                       | 0                           | 0 Hypothetical protein (1)                                       |                                                                                                                                                                                                                                                                                                                                                                         |                                                                                                                                                                                                                                                                                                                                                                                                                             | scaffold_6_mRNA_1502.1          | -                           | -                               |
| GF0030964 | 1                           | 0                       | 0                           | 0 Cytokinin riboside 5'-monophosphate phosphoribohydrolase (1)   |                                                                                                                                                                                                                                                                                                                                                                         | LOG family [IPR031100] (1)                                                                                                                                                                                                                                                                                                                                                                                                  | scaffold_6_mRNA_1501.1          | -                           | -                               |
| GF0030963 | 1                           | 0                       | 0                           | 0 Hypothetical protein (1)                                       |                                                                                                                                                                                                                                                                                                                                                                         | Leucine-rich repeat domain, L domain-like [IPR032675] (1)                                                                                                                                                                                                                                                                                                                                                                   | scaffold_6_mRNA_15.1            | -                           | -                               |
| GF0030962 | 1                           | 0                       | 0                           | 0 Hypothetical protein (1)                                       |                                                                                                                                                                                                                                                                                                                                                                         |                                                                                                                                                                                                                                                                                                                                                                                                                             | scaffold_6_mRNA_1497.1          | -                           | -                               |
| GF0030961 | 1                           | 0                       | 0                           | 0 Hypothetical protein (1)                                       |                                                                                                                                                                                                                                                                                                                                                                         |                                                                                                                                                                                                                                                                                                                                                                                                                             | scaffold_6_mRNA_1496.1          | -                           | -                               |

| ID        | Num. in <i>C. caryophyllata</i> | Num. in <i>C. uchiha</i> | Num. in <i>P. trifoliata</i> | Note                                                                                                       | GO                                                                                                                                                                                                                                                                                    | InterPro                                                                                                                                                                                                                                                                                                                                                                                                                        | Members in <i>C. caryophyllata</i> | Members in <i>C. uchiha</i> | Members in <i>P. trifoliata</i> |
|-----------|---------------------------------|--------------------------|------------------------------|------------------------------------------------------------------------------------------------------------|---------------------------------------------------------------------------------------------------------------------------------------------------------------------------------------------------------------------------------------------------------------------------------------|---------------------------------------------------------------------------------------------------------------------------------------------------------------------------------------------------------------------------------------------------------------------------------------------------------------------------------------------------------------------------------------------------------------------------------|------------------------------------|-----------------------------|---------------------------------|
| GF0030960 | 1                               | 0                        | 0                            | 0 Hypothetical protein (1)                                                                                 |                                                                                                                                                                                                                                                                                       |                                                                                                                                                                                                                                                                                                                                                                                                                                 | scaffold_6_mRNA_1490.1             | -                           | -                               |
| GF0030959 | 1                               | 0                        | 0                            | 0 Hypothetical protein (1)                                                                                 |                                                                                                                                                                                                                                                                                       |                                                                                                                                                                                                                                                                                                                                                                                                                                 | scaffold_6_mRNA_1476.1             | -                           | -                               |
| GF0030958 | 1                               | 0                        | 0                            | 0 Hypothetical protein (1)                                                                                 | nucleic acid binding [GO:0003676]<br>molecular_function (1); zinc ion binding [GO:0008270 molecular_function] (1)                                                                                                                                                                     | Zinc finger, CCHC-type [IPR001878] (1)                                                                                                                                                                                                                                                                                                                                                                                          | scaffold_6_mRNA_1472.1             | -                           | -                               |
| GF0030957 | 1                               | 0                        | 0                            | 0 MADS-box transcription factor family protein (1)                                                         | MAPK cascade [GO:0000165 biological_process] (1); protein dimerization activity [GO:0046983 molecular_function] (1); DNA binding [GO:0003677 molecular_function] (1); RNA polymerase II regulatory region sequence-specific DNA binding [GO:0000977 molecular_function] (1)           | MADS ME2-like [IPR033896] (1); Transcription factor, MADS-box [IPR002100] (1)                                                                                                                                                                                                                                                                                                                                                   | scaffold_6_mRNA_1462.1             | -                           | -                               |
| GF0030956 | 1                               | 0                        | 0                            | 0 NAD(P)-binding Rossmann-fold superfamily protein isoform 2 (1)                                           |                                                                                                                                                                                                                                                                                       | NAD(P)-binding domain [IPR016040] (1); Short-chain dehydrogenase/reductase SDR [IPR002347] (1)                                                                                                                                                                                                                                                                                                                                  | scaffold_6_mRNA_1461.1             | -                           | -                               |
| GF0030955 | 1                               | 0                        | 0                            | 0 Hypothetical protein (1)                                                                                 |                                                                                                                                                                                                                                                                                       |                                                                                                                                                                                                                                                                                                                                                                                                                                 | scaffold_6_mRNA_1458.1             | -                           | -                               |
| GF0030954 | 1                               | 0                        | 0                            | 0 Hypothetical protein (1)                                                                                 |                                                                                                                                                                                                                                                                                       |                                                                                                                                                                                                                                                                                                                                                                                                                                 | scaffold_6_mRNA_1448.1             | -                           | -                               |
| GF0030953 | 1                               | 0                        | 0                            | 0 Cytokinin riboside 5'-monophosphate phosphoribohydrolase (1)                                             |                                                                                                                                                                                                                                                                                       | LOG family [IPR031100] (1); Cytokinin riboside 5'-monophosphate phosphoribohydrolase LOG [IPR005269] (1)                                                                                                                                                                                                                                                                                                                        | scaffold_6_mRNA_1447.1             | -                           | -                               |
| GF0030952 | 1                               | 0                        | 0                            | 0 Hypothetical protein (1)                                                                                 |                                                                                                                                                                                                                                                                                       |                                                                                                                                                                                                                                                                                                                                                                                                                                 | scaffold_6_mRNA_1446.1             | -                           | -                               |
| GF0030951 | 1                               | 0                        | 0                            | 0 Hypothetical protein (1)                                                                                 |                                                                                                                                                                                                                                                                                       |                                                                                                                                                                                                                                                                                                                                                                                                                                 | scaffold_6_mRNA_1445.1             | -                           | -                               |
| GF0030950 | 1                               | 0                        | 0                            | 0 Histone H4 (1)                                                                                           | nucleosome [GO:0000786 cellular_component] (1); protein heterodimerization activity [GO:0046982 molecular_function] (1); nucleus [GO:0005634 cellular_component] (1); DNA binding [GO:0003677 molecular_function] (1); nucleosome assembly [GO:0006334 biological_process] (1)        | Histone H4, conserved site [IPR019809] (1); Histone H4 [IPR019511] (1); Histone-fold [IPR009072] (1)                                                                                                                                                                                                                                                                                                                            | scaffold_6_mRNA_1439.1             | -                           | -                               |
| GF0030949 | 1                               | 0                        | 0                            | 0 Hypothetical protein (1)                                                                                 | nucleic acid binding [GO:0003676 molecular_function] (1)                                                                                                                                                                                                                              | Ribonuclease H-like domain [IPR012337] (1)                                                                                                                                                                                                                                                                                                                                                                                      | scaffold_6_mRNA_1424.1             | -                           | -                               |
| GF0030948 | 1                               | 0                        | 0                            | 0 Hypothetical protein (1)                                                                                 |                                                                                                                                                                                                                                                                                       |                                                                                                                                                                                                                                                                                                                                                                                                                                 | scaffold_6_mRNA_1412.1             | -                           | -                               |
| GF0030947 | 1                               | 0                        | 0                            | 0 Hypothetical protein (1)                                                                                 |                                                                                                                                                                                                                                                                                       |                                                                                                                                                                                                                                                                                                                                                                                                                                 | scaffold_6_mRNA_1411.1             | -                           | -                               |
| GF0030946 | 1                               | 0                        | 0                            | 0 Cytokinin riboside 5'-monophosphate phosphoribohydrolase (1)                                             |                                                                                                                                                                                                                                                                                       | Cytokinin riboside 5'-monophosphate phosphoribohydrolase LOG [IPR005269] (1); LOG family [IPR031100] (1)                                                                                                                                                                                                                                                                                                                        | scaffold_6_mRNA_1410.1             | -                           | -                               |
| GF0030945 | 1                               | 0                        | 0                            | 0 Hypothetical protein (1)                                                                                 |                                                                                                                                                                                                                                                                                       | Domain of unknown function DUF4283 [IPR025558] (1); Zinc knuckle CX2CX4HX4C [IPR025836] (1)                                                                                                                                                                                                                                                                                                                                     | scaffold_6_mRNA_1411.1             | -                           | -                               |
| GF0030944 | 1                               | 0                        | 0                            | 0 Hypothetical protein (1)                                                                                 |                                                                                                                                                                                                                                                                                       |                                                                                                                                                                                                                                                                                                                                                                                                                                 | scaffold_6_mRNA_1400.1             | -                           | -                               |
| GF0030943 | 1                               | 0                        | 0                            | 0 Ta11 non-LTR retroelement protein-like (1)                                                               |                                                                                                                                                                                                                                                                                       | Domain of unknown function DUF4283 [IPR025558] (1); Zinc knuckle CX2CX4HX4C [IPR025836] (1)                                                                                                                                                                                                                                                                                                                                     | scaffold_6_mRNA_140.1              | -                           | -                               |
| GF0030942 | 1                               | 0                        | 0                            | 0 Hypothetical protein (1)                                                                                 |                                                                                                                                                                                                                                                                                       |                                                                                                                                                                                                                                                                                                                                                                                                                                 | scaffold_6_mRNA_139.1              | -                           | -                               |
| GF0030941 | 1                               | 0                        | 0                            | 0 Hypothetical protein (1)                                                                                 |                                                                                                                                                                                                                                                                                       |                                                                                                                                                                                                                                                                                                                                                                                                                                 | scaffold_6_mRNA_1385.1             | -                           | -                               |
| GF0030940 | 1                               | 0                        | 0                            | 0 Transposable element protein, putative, (1)                                                              |                                                                                                                                                                                                                                                                                       | Retrotransposon gag domain [IPR005162] (1)                                                                                                                                                                                                                                                                                                                                                                                      | scaffold_6_mRNA_1384.1             | -                           | -                               |
| GF0030939 | 1                               | 0                        | 0                            | 0 RNA-directed DNA polymerase (Reverse transcriptase) (1)                                                  |                                                                                                                                                                                                                                                                                       | Reverse transcriptase domain [IPR004771] (1); Endonuclease/exonuclease/phosphatase [IPR005135] (1)                                                                                                                                                                                                                                                                                                                              | scaffold_6_mRNA_138.1              | -                           | -                               |
| GF0030938 | 1                               | 0                        | 0                            | 0 Hypothetical protein (1)                                                                                 |                                                                                                                                                                                                                                                                                       |                                                                                                                                                                                                                                                                                                                                                                                                                                 | scaffold_6_mRNA_1379.1             | -                           | -                               |
| GF0030937 | 1                               | 0                        | 0                            | 0 Hypothetical protein (1)                                                                                 |                                                                                                                                                                                                                                                                                       | Domain of unknown function DUF4283 [IPR025558] (1)                                                                                                                                                                                                                                                                                                                                                                              | scaffold_6_mRNA_1373.1             | -                           | -                               |
| GF0030936 | 1                               | 0                        | 0                            | 0 Hypothetical protein (1)                                                                                 | nucleic acid binding [GO:0003676 molecular_function] (1)                                                                                                                                                                                                                              | Ribonuclease H-like domain [IPR012337] (1)                                                                                                                                                                                                                                                                                                                                                                                      | scaffold_6_mRNA_1362.1             | -                           | -                               |
| GF0030935 | 1                               | 0                        | 0                            | 0 Hypothetical protein (1)                                                                                 |                                                                                                                                                                                                                                                                                       | Endonuclease/exonuclease/phosphatase [IPR005135] (1)                                                                                                                                                                                                                                                                                                                                                                            | scaffold_6_mRNA_1360.1             | -                           | -                               |
| GF0030934 | 1                               | 0                        | 0                            | 0 Hypothetical protein (1)                                                                                 |                                                                                                                                                                                                                                                                                       |                                                                                                                                                                                                                                                                                                                                                                                                                                 | scaffold_6_mRNA_1354.1             | -                           | -                               |
| GF0030933 | 1                               | 0                        | 0                            | 0 Subtilisin-like protease SDD1 (1)                                                                        | proteolysis [GO:0006508 biological_process] (1); serine-type endopeptidase activity [GO:0004252 molecular_function] (1)                                                                                                                                                               | Peptidase S8 propeptide/proteinase inhibitor 9 [IPR010259] (1); Peptidase S8, subtilisin-related [IPR015500] (1); Cucumisin-like catalytic domain [IPR034197] (1); PA domain [IPR003137] (1); Peptidase S8/S83 domain [IPR000209] (1)                                                                                                                                                                                           | scaffold_6_mRNA_1344.1             | -                           | -                               |
| GF0030932 | 1                               | 0                        | 0                            | 0 Hypothetical protein (1)                                                                                 |                                                                                                                                                                                                                                                                                       |                                                                                                                                                                                                                                                                                                                                                                                                                                 | scaffold_6_mRNA_1343.1             | -                           | -                               |
| GF0030931 | 1                               | 0                        | 0                            | 0 Hypothetical protein (1)                                                                                 | transcription, DNA-templated [GO:0006351 biological_process] (1); DNA-directed 5'-3' RNA polymerase activity [GO:0003699 molecular_function] (1); DNA binding [GO:0003677 molecular_function] (1); ribonuclease binding [GO:0032549 molecular_function] (1)                           | DNA-directed RNA polymerase, subunit 2 [IPR015712] (1); RNA polymerase Rpb2, domain 7 [IPR007641] (1)                                                                                                                                                                                                                                                                                                                           | scaffold_6_mRNA_1330.1             | -                           | -                               |
| GF0030930 | 1                               | 0                        | 0                            | 0 Monosaccharide transport protein (1)                                                                     |                                                                                                                                                                                                                                                                                       |                                                                                                                                                                                                                                                                                                                                                                                                                                 | scaffold_6_mRNA_1320.1             | -                           | -                               |
| GF0030929 | 1                               | 0                        | 0                            | 0 Hypothetical protein (1)                                                                                 |                                                                                                                                                                                                                                                                                       |                                                                                                                                                                                                                                                                                                                                                                                                                                 | scaffold_6_mRNA_1317.1             | -                           | -                               |
| GF0030928 | 1                               | 0                        | 0                            | 0 Hypothetical protein (1)                                                                                 |                                                                                                                                                                                                                                                                                       |                                                                                                                                                                                                                                                                                                                                                                                                                                 | scaffold_6_mRNA_1315.1             | -                           | -                               |
| GF0030927 | 1                               | 0                        | 0                            | 0 Cytokinin riboside 5'-monophosphate phosphoribohydrolase (1)                                             |                                                                                                                                                                                                                                                                                       | LOG family [IPR031100] (1)                                                                                                                                                                                                                                                                                                                                                                                                      | scaffold_6_mRNA_1314.1             | -                           | -                               |
| GF0030926 | 1                               | 0                        | 0                            | 0 Hypothetical protein (1)                                                                                 |                                                                                                                                                                                                                                                                                       | Tubulin Fx2, 2-layer sandwich domain [IPR018316] (1); Ubiquitin domain [IPR000626] (1); Aspartic peptidase domain [IPR021109] (1); Ubiquitin [IPR019956] (1); Ubiquitin-related domain [IPR029071] (1); Ubiquitin conserved site [IPR019954] (1)                                                                                                                                                                                | scaffold_6_mRNA_1313.1             | -                           | -                               |
| GF0030925 | 1                               | 0                        | 0                            | 0 Hypothetical protein (1)                                                                                 | protein binding [GO:0005515 molecular_function] (1)                                                                                                                                                                                                                                   | Protein kinase-like domain [IPR011009] (1)                                                                                                                                                                                                                                                                                                                                                                                      | scaffold_6_mRNA_1309.1             | -                           | -                               |
| GF0030924 | 1                               | 0                        | 0                            | 0 Hypothetical protein (1)                                                                                 |                                                                                                                                                                                                                                                                                       | Reverse transcriptase zinc-binding domain [IPR026960] (1); Domain of unknown function DUF4283 [IPR025558] (1); Ribonuclease H-like domain [IPR012337] (1); Reverse transcriptase domain [IPR000477] (1); Zinc finger, CCHC-type [IPR001878] (1)                                                                                                                                                                                 | scaffold_6_mRNA_1304.1             | -                           | -                               |
| GF0030923 | 1                               | 0                        | 0                            | 0 RNA-directed DNA polymerase (Reverse transcriptase); Polynucleotide transferase, Ribonuclease H fold (1) | nucleic acid binding [GO:0003676 molecular_function] (1); zinc ion binding [GO:0008270 molecular_function] (1)                                                                                                                                                                        |                                                                                                                                                                                                                                                                                                                                                                                                                                 | scaffold_6_mRNA_1299.1             | -                           | -                               |
| GF0030922 | 1                               | 0                        | 0                            | 0 Hypothetical protein (1)                                                                                 |                                                                                                                                                                                                                                                                                       |                                                                                                                                                                                                                                                                                                                                                                                                                                 | scaffold_6_mRNA_1297.1             | -                           | -                               |
| GF0030921 | 1                               | 0                        | 0                            | 0 Hypothetical protein (1)                                                                                 |                                                                                                                                                                                                                                                                                       | Retrotransposon gag domain [IPR005162] (1)                                                                                                                                                                                                                                                                                                                                                                                      | scaffold_6_mRNA_1296.1             | -                           | -                               |
| GF0030920 | 1                               | 0                        | 0                            | 0 Hypothetical protein (1)                                                                                 | structural constituent of ribosome [GO:0003735 molecular_function] (1); translation [GO:0006412 biological_process] (1); intracellular [GO:0005622 cellular_component] (1); ribosome [GO:0005840 cellular_component] (1)                                                              | Ribosomal protein L2 domain 2 [IPR014722] (1); Ribosomal protein L27c [IPR001141] (1); Translation protein SH3-like domain [IPR008991] (1)                                                                                                                                                                                                                                                                                      | scaffold_6_mRNA_129.1              | -                           | -                               |
| GF0030919 | 1                               | 0                        | 0                            | 0 Hypothetical protein (1)                                                                                 |                                                                                                                                                                                                                                                                                       |                                                                                                                                                                                                                                                                                                                                                                                                                                 | scaffold_6_mRNA_1285.1             | -                           | -                               |
| GF0030918 | 1                               | 0                        | 0                            | 0 Hypothetical protein (1)                                                                                 |                                                                                                                                                                                                                                                                                       |                                                                                                                                                                                                                                                                                                                                                                                                                                 | scaffold_6_mRNA_1284.1             | -                           | -                               |
| GF0030917 | 1                               | 0                        | 0                            | 0 LRR receptor-like kinase family protein (1)                                                              | protein binding [GO:0005515 molecular_function] (1); ATP binding [GO:0005524 molecular_function] (1); protein phosphorylation [GO:0006468 biological_process] (1); protein kinase activity [GO:0004672 molecular_function] (1)                                                        | Protein kinase, ATP binding site [IPR017441] (1); Serine/threonine-protein kinase, active site [IPR008271] (1); Leucine-rich repeat-containing N-terminal, plant-type [IPR013210] (1); Leucine-rich repeat [IPR001611] (1); Protein kinase domain [IPR000709] (1); Leucine-rich repeat, typical sub-type [IPR003591] (1); Leucine-rich repeat domain, L domain-like [IPR032675] (1); Protein kinase-like domain [IPR011009] (1) | scaffold_6_mRNA_128.1              | -                           | -                               |
| GF0030916 | 1                               | 0                        | 0                            | 0 Hypothetical protein (1)                                                                                 |                                                                                                                                                                                                                                                                                       |                                                                                                                                                                                                                                                                                                                                                                                                                                 | scaffold_6_mRNA_1274.1             | -                           | -                               |
| GF0030915 | 1                               | 0                        | 0                            | 0 Hypothetical protein (1)                                                                                 |                                                                                                                                                                                                                                                                                       |                                                                                                                                                                                                                                                                                                                                                                                                                                 | scaffold_6_mRNA_1273.1             | -                           | -                               |
| GF0030914 | 1                               | 0                        | 0                            | 0 Hypothetical protein (1)                                                                                 |                                                                                                                                                                                                                                                                                       |                                                                                                                                                                                                                                                                                                                                                                                                                                 | scaffold_6_mRNA_127.1              | -                           | -                               |
| GF0030913 | 1                               | 0                        | 0                            | 0 Hypothetical protein (1)                                                                                 |                                                                                                                                                                                                                                                                                       |                                                                                                                                                                                                                                                                                                                                                                                                                                 | scaffold_6_mRNA_1268.1             | -                           | -                               |
| GF0030912 | 1                               | 0                        | 0                            | 0 40S ribosomal protein S23 (1)                                                                            | small ribosomal subunit [GO:0015935 cellular_component] (1); ribosome [GO:0005840 cellular_component] (1); structural constituent of ribosome [GO:0003735 molecular_function] (1); translation [GO:0006412 biological_process] (1); intracellular [GO:0005622 cellular_component] (1) | Ribosomal protein S23, eukaryote/archaea [IPR005680] (1); Ribosomal protein S12/S23 [IPR006032] (1); Nucleic acid-binding, OB-fold [IPR012340] (1)                                                                                                                                                                                                                                                                              | scaffold_6_mRNA_1261.1             | -                           | -                               |
| GF0030911 | 1                               | 0                        | 0                            | 0 Hypothetical protein (1)                                                                                 |                                                                                                                                                                                                                                                                                       |                                                                                                                                                                                                                                                                                                                                                                                                                                 | scaffold_6_mRNA_126.1              | -                           | -                               |
| GF0030910 | 1                               | 0                        | 0                            | 0 Protein FAR1-RELATED SEQUENCE (1)                                                                        | regulation of transcription, DNA-templated [GO:0006355 biological_process] (1); zinc ion binding [GO:0008270 molecular_function] (1)                                                                                                                                                  | Zinc finger, PMZ-type [IPR006564] (1); Zinc finger, SWIM-type [IPR007527] (1); FHY3/FAR1 family [IPR031052] (1)                                                                                                                                                                                                                                                                                                                 | scaffold_6_mRNA_1258.1             | -                           | -                               |
| GF0030909 | 1                               | 0                        | 0                            | 0 Hypothetical protein (1)                                                                                 |                                                                                                                                                                                                                                                                                       |                                                                                                                                                                                                                                                                                                                                                                                                                                 | scaffold_6_mRNA_1256.1             | -                           | -                               |

| ID        | Num. in <i>C. clementiae</i> | Num. in <i>C. uchiha</i> | Num. in <i>P. trifoliata</i> | Note                                                           | GO                                                                                                                                                                                                                                                                                                                                                                                                                                | InterPro                                                                                                                                                                                                                                                                                                                                           | Members in <i>C. clementiae</i> | Members in <i>C. uchiha</i> | Members in <i>P. trifoliata</i> |
|-----------|------------------------------|--------------------------|------------------------------|----------------------------------------------------------------|-----------------------------------------------------------------------------------------------------------------------------------------------------------------------------------------------------------------------------------------------------------------------------------------------------------------------------------------------------------------------------------------------------------------------------------|----------------------------------------------------------------------------------------------------------------------------------------------------------------------------------------------------------------------------------------------------------------------------------------------------------------------------------------------------|---------------------------------|-----------------------------|---------------------------------|
| GF0030908 | 1                            | 0                        | 0                            | 0 Hypothetical protein (1)                                     |                                                                                                                                                                                                                                                                                                                                                                                                                                   |                                                                                                                                                                                                                                                                                                                                                    | scaffold_6_mRNA_1253.1          | -                           | -                               |
| GF0030907 | 1                            | 0                        | 0                            | 0 Cytokinin riboside 5'-monophosphate phosphoribohydrolase (1) |                                                                                                                                                                                                                                                                                                                                                                                                                                   | LOG family [IPR031100] (1)                                                                                                                                                                                                                                                                                                                         | scaffold_6_mRNA_1252.1          | -                           | -                               |
| GF0030906 | 1                            | 0                        | 0                            | 0 Hypothetical protein (1)                                     |                                                                                                                                                                                                                                                                                                                                                                                                                                   |                                                                                                                                                                                                                                                                                                                                                    | scaffold_6_mRNA_125.1           | -                           | -                               |
| GF0030905 | 1                            | 0                        | 0                            | 0 Hypothetical protein (1)                                     |                                                                                                                                                                                                                                                                                                                                                                                                                                   |                                                                                                                                                                                                                                                                                                                                                    | scaffold_6_mRNA_1248.1          | -                           | -                               |
| GF0030904 | 1                            | 0                        | 0                            | 0 Hypothetical protein (1)                                     |                                                                                                                                                                                                                                                                                                                                                                                                                                   |                                                                                                                                                                                                                                                                                                                                                    | scaffold_6_mRNA_1245.1          | -                           | -                               |
| GF0030903 | 1                            | 0                        | 0                            | 0 Alpha-beta-Hydrolases superfamily protein isoform 3 (1)      |                                                                                                                                                                                                                                                                                                                                                                                                                                   | Alpha/Beta hydrolase fold [IPR029058] (1)                                                                                                                                                                                                                                                                                                          | scaffold_6_mRNA_1240.1          | -                           | -                               |
| GF0030902 | 1                            | 0                        | 0                            | 0 Cysteine-rich RLK (RECEPTOR-like protein kinase) 8 (1)       | nucleic acid binding [GO:0003676 molecular_function] (1)                                                                                                                                                                                                                                                                                                                                                                          | [IPR012337] (1); Reverse transcriptase, RNA-dependent DNA polymerase [IPR013103] (1)                                                                                                                                                                                                                                                               | scaffold_6_mRNA_124.1           | -                           | -                               |
| GF0030901 | 1                            | 0                        | 0                            | 0 Hypothetical protein (1)                                     | integral component of membrane [GO:0016021 cellular_component] (1); dolichyl-diphosphooligosaccharide-protein glycotransferase activity [GO:0044579 molecular_function] (1); protein binding [GO:0005515 molecular_function] (1); protein phosphorylation [GO:0006468 biological_process] (1); protein kinase activity [GO:0004672 molecular_function] (1); oligosaccharyltransferase complex [GO:0008250 cellular_component] (1) |                                                                                                                                                                                                                                                                                                                                                    | scaffold_6_mRNA_1239.1          | -                           |                                 |
| GF0030900 | 1                            | 0                        | 0                            | 0 LRR receptor-like kinase family protein putative (1)         |                                                                                                                                                                                                                                                                                                                                                                                                                                   | Leucine-rich repeat [IPR001611] (1); Serine-threonine-tyrosine-protein kinase, catalytic domain [IPR001245] (1); DAD/Os2 [IPR003038] (1); Leucine-rich repeat, typical subtype [IPR003591] (1); Leucine-rich repeat domain, L domain-like [IPR032675] (1); Protein kinase-like domain [IPR011099] (1)                                              | scaffold_6_mRNA_1237.1          | -                           | -                               |
| GF0030899 | 1                            | 0                        | 0                            | 0 Hypothetical protein (1)                                     | protein binding [GO:0005515 molecular_function] (1)                                                                                                                                                                                                                                                                                                                                                                               | Pentatricopeptide repeat [IPR002885] (1); Tetratricopeptide-like helical domain [IPR011990] (1)                                                                                                                                                                                                                                                    | scaffold_6_mRNA_1236.1          | -                           | -                               |
| GF0030898 | 1                            | 0                        | 0                            | 0 Hypothetical protein (1)                                     | protein binding [GO:0005515 molecular_function] (1)                                                                                                                                                                                                                                                                                                                                                                               | Tetratricopeptide-like helical domain [IPR011990] (1); Pentatricopeptide repeat [IPR002885] (1)                                                                                                                                                                                                                                                    | scaffold_6_mRNA_1234.1          | -                           | -                               |
| GF0030897 | 1                            | 0                        | 0                            | 0 Hypothetical protein (1)                                     |                                                                                                                                                                                                                                                                                                                                                                                                                                   |                                                                                                                                                                                                                                                                                                                                                    | scaffold_6_mRNA_1232.1          | -                           | -                               |
| GF0030896 | 1                            | 0                        | 0                            | 0 tRNA synthetase class I (C) family protein (1)               | aminoacyl-tRNA ligase activity [GO:0004812 molecular_function] (1); nucleotide binding [GO:0000166 molecular_function] (1); ATP binding [GO:0005524 molecular_function] (1); tRNA aminoacylation for protein translation [GO:0006418 biological_process] (1)                                                                                                                                                                      | tRNA synthetases class I, catalytic domain [IPR032678] (1); Cysteine-tRNA synthetase/tyrosyl ligase [IPR024909] (1); Rossmann-like alpha beta alpha sandwich fold [IPR014729] (1); Aminoacyl-tRNA synthetase, class Ia, anticodon-binding [IPR009080] (1)                                                                                          | scaffold_6_mRNA_123.1           | -                           | -                               |
| GF0030895 | 1                            | 0                        | 0                            | 0 LRR receptor-like kinase family protein (1)                  | protein binding [GO:0005515 molecular_function] (1); ATP binding [GO:0005524 molecular_function] (1); protein phosphorylation [GO:0006468 biological_process] (1); protein kinase activity [GO:0004672 molecular_function] (1)                                                                                                                                                                                                    | Leucine-rich repeat [IPR001611] (1); Protein kinase, ATP binding site [IPR017441] (1); Tyrosine-protein kinase, active site [IPR008266] (1); Protein kinase-like domain [IPR011099] (1); Leucine-rich repeat domain, L domain-like [IPR032675] (1); Leucine-rich repeat, typical subtype [IPR003591] (1); Protein kinase domain [IPR000719] (1)    | scaffold_6_mRNA_1224.1          | -                           | -                               |
| GF0030894 | 1                            | 0                        | 0                            | 0 Hypothetical protein (1)                                     |                                                                                                                                                                                                                                                                                                                                                                                                                                   |                                                                                                                                                                                                                                                                                                                                                    | scaffold_6_mRNA_122.1           | -                           | -                               |
| GF0030893 | 1                            | 0                        | 0                            | 0 Hypothetical protein (1)                                     |                                                                                                                                                                                                                                                                                                                                                                                                                                   |                                                                                                                                                                                                                                                                                                                                                    | scaffold_6_mRNA_1219.1          | -                           | -                               |
| GF0030892 | 1                            | 0                        | 0                            | 0 Hypothetical protein (1)                                     |                                                                                                                                                                                                                                                                                                                                                                                                                                   |                                                                                                                                                                                                                                                                                                                                                    | scaffold_6_mRNA_1212.1          | -                           | -                               |
| GF0030891 | 1                            | 0                        | 0                            | 0 Cytokinin riboside 5'-monophosphate phosphoribohydrolase (1) |                                                                                                                                                                                                                                                                                                                                                                                                                                   | LOG family [IPR031100] (1)                                                                                                                                                                                                                                                                                                                         | scaffold_6_mRNA_1206.1          | -                           | -                               |
| GF0030890 | 1                            | 0                        | 0                            | 0 Hypothetical protein (1)                                     |                                                                                                                                                                                                                                                                                                                                                                                                                                   |                                                                                                                                                                                                                                                                                                                                                    | scaffold_6_mRNA_1203.1          | -                           | -                               |
| GF0030889 | 1                            | 0                        | 0                            | 0 Hypothetical protein (1)                                     |                                                                                                                                                                                                                                                                                                                                                                                                                                   |                                                                                                                                                                                                                                                                                                                                                    | scaffold_6_mRNA_1201.1          | -                           | -                               |
| GF0030888 | 1                            | 0                        | 0                            | 0 Polyubiquitin (1)                                            | protein binding [GO:0005515 molecular_function] (1)                                                                                                                                                                                                                                                                                                                                                                               | Ubiquitin conserved site [IPR019954] (1); Ubiquitin-related domain [IPR029071] (1); Ubiquitin [IPR019956] (1); Ubiquitin domain [IPR000626] (1)                                                                                                                                                                                                    | scaffold_6_mRNA_1200.1          | -                           | -                               |
| GF0030887 | 1                            | 0                        | 0                            | 0 Hypothetical protein (1)                                     |                                                                                                                                                                                                                                                                                                                                                                                                                                   | Cactin, central domain [IPR018816] (1)                                                                                                                                                                                                                                                                                                             | scaffold_6_mRNA_1199.1          | -                           | -                               |
| GF0030886 | 1                            | 0                        | 0                            | 0 Hypothetical protein (1)                                     |                                                                                                                                                                                                                                                                                                                                                                                                                                   |                                                                                                                                                                                                                                                                                                                                                    | scaffold_6_mRNA_1198.1          | -                           | -                               |
| GF0030885 | 1                            | 0                        | 0                            | 0 Hypothetical protein (1)                                     |                                                                                                                                                                                                                                                                                                                                                                                                                                   | Aspartic peptidase domain [IPR021109] (1)                                                                                                                                                                                                                                                                                                          | scaffold_6_mRNA_1196.1          | -                           | -                               |
| GF0030884 | 1                            | 0                        | 0                            | 0 Hypothetical protein (1)                                     |                                                                                                                                                                                                                                                                                                                                                                                                                                   |                                                                                                                                                                                                                                                                                                                                                    | scaffold_6_mRNA_1195.1          | -                           | -                               |
| GF0030883 | 1                            | 0                        | 0                            | 0 Hypothetical protein (1)                                     |                                                                                                                                                                                                                                                                                                                                                                                                                                   |                                                                                                                                                                                                                                                                                                                                                    | scaffold_6_mRNA_1194.1          | -                           | -                               |
| GF0030882 | 1                            | 0                        | 0                            | 0 Hypothetical protein (1)                                     | protein binding [GO:0005515 molecular_function] (1)                                                                                                                                                                                                                                                                                                                                                                               | Cactin, C-terminal [IPR019134] (1); Cactin, central domain [IPR018816] (1)                                                                                                                                                                                                                                                                         | scaffold_6_mRNA_1193.1          | -                           | -                               |
| GF0030881 | 1                            | 0                        | 0                            | 0 Hypothetical protein (1)                                     |                                                                                                                                                                                                                                                                                                                                                                                                                                   |                                                                                                                                                                                                                                                                                                                                                    | scaffold_6_mRNA_1191.1          | -                           | -                               |
| GF0030880 | 1                            | 0                        | 0                            | 0 Hypothetical protein (1)                                     |                                                                                                                                                                                                                                                                                                                                                                                                                                   |                                                                                                                                                                                                                                                                                                                                                    | scaffold_6_mRNA_1190.1          | -                           | -                               |
| GF0030879 | 1                            | 0                        | 0                            | 0 Hypothetical protein (1)                                     | DNA integrator [GO:0015074 biological_process] (1); nucleic acid binding [GO:0003676 molecular_function] (1)                                                                                                                                                                                                                                                                                                                      | Cytokinin riboside 5'-monophosphate phosphoribohydrolase LOG [IPR005269] (1); GAG-pre-integrase domain [IPR023784] (1); Ribonuclease H-like domain [IPR012337] (1); LOG family [IPR031100] (1); Integrase, catalytic core [IPR001584] (1)                                                                                                          | scaffold_6_mRNA_119.1           | -                           | -                               |
| GF0030878 | 1                            | 0                        | 0                            | 0 Hypothetical protein (1)                                     |                                                                                                                                                                                                                                                                                                                                                                                                                                   |                                                                                                                                                                                                                                                                                                                                                    | scaffold_6_mRNA_1189.1          | -                           | -                               |
| GF0030877 | 1                            | 0                        | 0                            | 0 Hypothetical protein (1)                                     |                                                                                                                                                                                                                                                                                                                                                                                                                                   |                                                                                                                                                                                                                                                                                                                                                    | scaffold_6_mRNA_1188.1          | -                           | -                               |
| GF0030876 | 1                            | 0                        | 0                            | 0 Hypothetical protein (1)                                     |                                                                                                                                                                                                                                                                                                                                                                                                                                   | Endonuclease/exonuclease/phosphatase [IPR051351] (1)                                                                                                                                                                                                                                                                                               | scaffold_6_mRNA_1186.1          | -                           | -                               |
| GF0030875 | 1                            | 0                        | 0                            | 0 Hypothetical protein (1)                                     |                                                                                                                                                                                                                                                                                                                                                                                                                                   |                                                                                                                                                                                                                                                                                                                                                    | scaffold_6_mRNA_1181.1          | -                           | -                               |
| GF0030874 | 1                            | 0                        | 0                            | 0 Hypothetical protein (1)                                     | nucleic acid binding [GO:0003676 molecular_function] (1); DNA integrator [GO:0015074 biological_process] (1)                                                                                                                                                                                                                                                                                                                      | Leucine-rich repeat domain, L domain-like [IPR032675] (1); Leucine-rich repeat, typical subtype [IPR003591] (1); Ribonuclease H-like domain [IPR012337] (1); Reverse transcriptase, RNA-dependent DNA polymerase [IPR013103] (1); Integrase, catalytic core [IPR001584] (1); Leucine-rich repeat-containing N-terminal, plant-type [IPR013210] (1) | scaffold_6_mRNA_118.1           | -                           | -                               |
| GF0030873 | 1                            | 0                        | 0                            | 0 Hypothetical protein (1)                                     |                                                                                                                                                                                                                                                                                                                                                                                                                                   |                                                                                                                                                                                                                                                                                                                                                    | scaffold_6_mRNA_1178.1          | -                           | -                               |
| GF0030872 | 1                            | 0                        | 0                            | 0 Hypothetical protein (1)                                     |                                                                                                                                                                                                                                                                                                                                                                                                                                   |                                                                                                                                                                                                                                                                                                                                                    | scaffold_6_mRNA_1173.1          | -                           | -                               |
| GF0030871 | 1                            | 0                        | 0                            | 0 Hypothetical protein (1)                                     |                                                                                                                                                                                                                                                                                                                                                                                                                                   |                                                                                                                                                                                                                                                                                                                                                    | scaffold_6_mRNA_1172.1          | -                           | -                               |
| GF0030870 | 1                            | 0                        | 0                            | 0 Cytokinin riboside 5'-monophosphate phosphoribohydrolase (1) |                                                                                                                                                                                                                                                                                                                                                                                                                                   | LOG family [IPR031100] (1); Cytokinin riboside 5'-monophosphate phosphoribohydrolase LOG [IPR005269] (1)                                                                                                                                                                                                                                           | scaffold_6_mRNA_1171.1          | -                           | -                               |
| GF0030869 | 1                            | 0                        | 0                            | 0 Hypothetical protein (1)                                     |                                                                                                                                                                                                                                                                                                                                                                                                                                   |                                                                                                                                                                                                                                                                                                                                                    | scaffold_6_mRNA_1170.1          | -                           | -                               |
| GF0030868 | 1                            | 0                        | 0                            | 0 Hypothetical protein (1)                                     |                                                                                                                                                                                                                                                                                                                                                                                                                                   | Transposase-associated domain [IPR029480] (1)                                                                                                                                                                                                                                                                                                      | scaffold_6_mRNA_1169.1          | -                           | -                               |
| GF0030867 | 1                            | 0                        | 0                            | 0 Hypothetical protein (1)                                     |                                                                                                                                                                                                                                                                                                                                                                                                                                   |                                                                                                                                                                                                                                                                                                                                                    | scaffold_6_mRNA_1164.1          | -                           | -                               |
| GF0030866 | 1                            | 0                        | 0                            | 0 Cytokinin riboside 5'-monophosphate phosphoribohydrolase (1) |                                                                                                                                                                                                                                                                                                                                                                                                                                   | Cytokinin riboside 5'-monophosphate phosphoribohydrolase LOG [IPR005269] (1); LOG family [IPR031100] (1)                                                                                                                                                                                                                                           | scaffold_6_mRNA_1163.1          | -                           | -                               |
| GF0030865 | 1                            | 0                        | 0                            | 0 Hypothetical protein (1)                                     |                                                                                                                                                                                                                                                                                                                                                                                                                                   |                                                                                                                                                                                                                                                                                                                                                    | scaffold_6_mRNA_1162.1          | -                           | -                               |
| GF0030864 | 1                            | 0                        | 0                            | 0 Hypothetical protein (1)                                     |                                                                                                                                                                                                                                                                                                                                                                                                                                   |                                                                                                                                                                                                                                                                                                                                                    | scaffold_6_mRNA_1160.1          | -                           | -                               |
| GF0030863 | 1                            | 0                        | 0                            | 0 Putative non-LTR retroelement reverse transcriptase (1)      | nucleic acid binding [GO:0003676 molecular_function] (1)                                                                                                                                                                                                                                                                                                                                                                          | Ribonuclease H-like domain [IPR012337] (1)                                                                                                                                                                                                                                                                                                         | scaffold_6_mRNA_116.1           | -                           | -                               |
| GF0030862 | 1                            | 0                        | 0                            | 0 Hypothetical protein (1)                                     |                                                                                                                                                                                                                                                                                                                                                                                                                                   |                                                                                                                                                                                                                                                                                                                                                    | scaffold_6_mRNA_115.1           | -                           | -                               |
| GF0030861 | 1                            | 0                        | 0                            | 0 Cytokinin riboside 5'-monophosphate phosphoribohydrolase (1) |                                                                                                                                                                                                                                                                                                                                                                                                                                   | LOG family [IPR031100] (1); Cytokinin riboside 5'-monophosphate phosphoribohydrolase LOG [IPR005269] (1)                                                                                                                                                                                                                                           | scaffold_6_mRNA_1149.1          | -                           | -                               |
| GF0030860 | 1                            | 0                        | 0                            | 0 Hypothetical protein (1)                                     |                                                                                                                                                                                                                                                                                                                                                                                                                                   |                                                                                                                                                                                                                                                                                                                                                    | scaffold_6_mRNA_1148.1          | -                           | -                               |
| GF0030859 | 1                            | 0                        | 0                            | 0 Hypothetical protein (1)                                     |                                                                                                                                                                                                                                                                                                                                                                                                                                   |                                                                                                                                                                                                                                                                                                                                                    | scaffold_6_mRNA_1147.1          | -                           | -                               |
| GF0030858 | 1                            | 0                        | 0                            | 0 RnasH1 protein (1)                                           | nucleic acid binding [GO:0003676 molecular_function] (1)                                                                                                                                                                                                                                                                                                                                                                          | Ribonuclease H-like domain [IPR012337] (1)                                                                                                                                                                                                                                                                                                         | scaffold_6_mRNA_1141.1          | -                           | -                               |
| GF0030857 | 1                            | 0                        | 0                            | 0 Hypothetical protein (1)                                     |                                                                                                                                                                                                                                                                                                                                                                                                                                   |                                                                                                                                                                                                                                                                                                                                                    | scaffold_6_mRNA_114.1           | -                           | -                               |
| GF0030856 | 1                            | 0                        | 0                            | 0 Cytokinin riboside 5'-monophosphate phosphoribohydrolase (1) |                                                                                                                                                                                                                                                                                                                                                                                                                                   | LOG family [IPR031100] (1); Domain of unknown function DUF4216 [IPR025312] (1)                                                                                                                                                                                                                                                                     | scaffold_6_mRNA_113.1           | -                           | -                               |
| GF0030855 | 1                            | 0                        | 0                            | 0 Hypothetical protein (1)                                     |                                                                                                                                                                                                                                                                                                                                                                                                                                   |                                                                                                                                                                                                                                                                                                                                                    | scaffold_6_mRNA_1128.1          | -                           | -                               |
| GF0030854 | 1                            | 0                        | 0                            | 0 Hypothetical protein (1)                                     |                                                                                                                                                                                                                                                                                                                                                                                                                                   | LOG family [IPR031100] (1)                                                                                                                                                                                                                                                                                                                         | scaffold_6_mRNA_1125.1          | -                           | -                               |
| GF0030853 | 1                            | 0                        | 0                            | 0 Hypothetical protein (1)                                     |                                                                                                                                                                                                                                                                                                                                                                                                                                   |                                                                                                                                                                                                                                                                                                                                                    | scaffold_6_mRNA_1123.1          | -                           | -                               |
| GF0030852 | 1                            | 0                        | 0                            | 0 Hypothetical protein (1)                                     | nucleic acid binding [GO:0003676 molecular_function] (1)                                                                                                                                                                                                                                                                                                                                                                          | Ribonuclease H-like domain [IPR012337] (1)                                                                                                                                                                                                                                                                                                         | scaffold_6_mRNA_1119.1          | -                           | -                               |
| GF0030851 | 1                            | 0                        | 0                            | 0 Hypothetical protein (1)                                     |                                                                                                                                                                                                                                                                                                                                                                                                                                   |                                                                                                                                                                                                                                                                                                                                                    | scaffold_6_mRNA_1118.1          | -                           | -                               |
| GF0030850 | 1                            | 0                        | 0                            | 0 Hypothetical protein (1)                                     |                                                                                                                                                                                                                                                                                                                                                                                                                                   |                                                                                                                                                                                                                                                                                                                                                    | scaffold_6_mRNA_1117.1          | -                           | -                               |
| GF0030849 | 1                            | 0                        | 0                            | 0 Hypothetical protein (1)                                     |                                                                                                                                                                                                                                                                                                                                                                                                                                   |                                                                                                                                                                                                                                                                                                                                                    | scaffold_6_mRNA_1115.1          | -                           | -                               |
| GF0030848 | 1                            | 0                        | 0                            | 0 Hypothetical protein (1)                                     |                                                                                                                                                                                                                                                                                                                                                                                                                                   |                                                                                                                                                                                                                                                                                                                                                    | scaffold_6_mRNA_1111.1          | -                           | -                               |
| GF0030847 | 1                            | 0                        | 0                            | 0 Hypothetical protein (1)                                     |                                                                                                                                                                                                                                                                                                                                                                                                                                   |                                                                                                                                                                                                                                                                                                                                                    | scaffold_6_mRNA_1110.1          | -                           | -                               |
| GF0030846 | 1                            | 0                        | 0                            | 0 Hypothetical protein (1)                                     |                                                                                                                                                                                                                                                                                                                                                                                                                                   |                                                                                                                                                                                                                                                                                                                                                    | scaffold_6_mRNA_1107.1          | -                           | -                               |
| GF0030845 | 1                            | 0                        | 0                            | 0 Hypothetical protein (1)                                     | zinc ion binding [GO:0008270 molecular_function] (1); nucleic acid binding [GO:0003676 molecular_function] (1)                                                                                                                                                                                                                                                                                                                    | Zinc finger, CCHC-type [IPR001878] (1); Zinc finger, PBM-type [IPR006564] (1)                                                                                                                                                                                                                                                                      | scaffold_6_mRNA_1104.1          | -                           | -                               |
| GF0030844 | 1                            | 0                        | 0                            | 0 Hypothetical protein (1)                                     |                                                                                                                                                                                                                                                                                                                                                                                                                                   |                                                                                                                                                                                                                                                                                                                                                    | scaffold_6_mRNA_1101.1          | -                           | -                               |

| ID        | Num. in <i>C. clementiae</i> | Num. in <i>C. uchiha</i> | Num. in <i>P. trifoliata</i> | Note                                                                  | GO                                                                                                                                                                                                     | InterPro                                                                                                                                                                     | Members in <i>C. clementiae</i> | Members in <i>C. uchiha</i> | Members in <i>P. trifoliata</i> |
|-----------|------------------------------|--------------------------|------------------------------|-----------------------------------------------------------------------|--------------------------------------------------------------------------------------------------------------------------------------------------------------------------------------------------------|------------------------------------------------------------------------------------------------------------------------------------------------------------------------------|---------------------------------|-----------------------------|---------------------------------|
| GF0030843 | 1                            | 0                        | 0                            | 0 Hypothetical protein (1)                                            |                                                                                                                                                                                                        | Ubiquitin conserved site [IPR019954]                                                                                                                                         | scaffold_6_mRNA_1099.1          | -                           | -                               |
| GF0030842 | 1                            | 0                        | 0                            | 0 Hypothetical protein (1)                                            | protein binding [GO:0005515 molecular_function] (1)                                                                                                                                                    | (1); Ubiquitin-related domain [IPR029071] (1); Ubiquitin [IPR019956] (1); Ubiquitin domain [IPR000626] (1)                                                                   | scaffold_6_mRNA_1095.1          | -                           | -                               |
| GF0030841 | 1                            | 0                        | 0                            | 0 Cytokinin riboside 5'-monophosphate phosphoribohydrolase (1)        |                                                                                                                                                                                                        |                                                                                                                                                                              | scaffold_6_mRNA_1094.1          | -                           | -                               |
| GF0030840 | 1                            | 0                        | 0                            | 0 Hypothetical protein (1)                                            | catalytic activity [GO:0003824 molecular_function] (1)                                                                                                                                                 | Glycoside hydrolase superfamily [IPR017853] (1); Aldolase-type TIM barrel [IPR013785] (1)                                                                                    | scaffold_6_mRNA_1082.1          | -                           | -                               |
| GF0030839 | 1                            | 0                        | 0                            | 0 Hypothetical protein (1)                                            |                                                                                                                                                                                                        |                                                                                                                                                                              | scaffold_6_mRNA_1079.1          | -                           | -                               |
| GF0030838 | 1                            | 0                        | 0                            | 0 Hypothetical protein (1)                                            |                                                                                                                                                                                                        |                                                                                                                                                                              | scaffold_6_mRNA_1076.1          | -                           | -                               |
| GF0030837 | 1                            | 0                        | 0                            | 0 Hypothetical protein (1)                                            |                                                                                                                                                                                                        |                                                                                                                                                                              | scaffold_6_mRNA_1074.1          | -                           | -                               |
| GF0030836 | 1                            | 0                        | 0                            | 0 Cytokinin riboside 5'-monophosphate phosphoribohydrolase (1)        |                                                                                                                                                                                                        | Cytokinin riboside 5'-monophosphate phosphoribohydrolase LOG [IPR005269] (1); LOG family [IPR031100] (1)                                                                     | scaffold_6_mRNA_1071.1          | -                           | -                               |
| GF0030835 | 1                            | 0                        | 0                            | 0 Hypothetical protein (1)                                            |                                                                                                                                                                                                        | Retrotransposon gag domain [IPR05162] (1)                                                                                                                                    | scaffold_6_mRNA_1070.1          | -                           | -                               |
| GF0030834 | 1                            | 0                        | 0                            | 0 Hypothetical protein (1)                                            |                                                                                                                                                                                                        |                                                                                                                                                                              | scaffold_6_mRNA_107.1           | -                           | -                               |
| GF0030833 | 1                            | 0                        | 0                            | 0 Hypothetical protein (1)                                            |                                                                                                                                                                                                        | Transposon, En/Spm-like [IPR004242] (1)                                                                                                                                      | scaffold_6_mRNA_1067.1          | -                           | -                               |
| GF0030832 | 1                            | 0                        | 0                            | 0 Cytokinin riboside 5'-monophosphate phosphoribohydrolase (1)        |                                                                                                                                                                                                        | Cytokinin riboside 5'-monophosphate phosphoribohydrolase LOG [IPR005269] (1); LOG family [IPR031100] (1)                                                                     | scaffold_6_mRNA_1065.1          | -                           | -                               |
| GF0030831 | 1                            | 0                        | 0                            | 0 Hypothetical protein (1)                                            | nucleic acid binding [GO:0003676 molecular_function] (1); regulation of transcription, DNA-templated [GO:0006355 biological_process] (1)                                                               | Carfavirus nucleic acid-binding protein [IPR02568] (1)                                                                                                                       | scaffold_6_mRNA_1064.1          | -                           | -                               |
| GF0030830 | 1                            | 0                        | 0                            | 0 Hypothetical protein (1)                                            |                                                                                                                                                                                                        |                                                                                                                                                                              | scaffold_6_mRNA_1063.1          | -                           | -                               |
| GF0030829 | 1                            | 0                        | 0                            | 0 Hypothetical protein (1)                                            |                                                                                                                                                                                                        |                                                                                                                                                                              | scaffold_6_mRNA_1055.1          | -                           | -                               |
| GF0030828 | 1                            | 0                        | 0                            | 0 Hypothetical protein (1)                                            |                                                                                                                                                                                                        |                                                                                                                                                                              | scaffold_6_mRNA_1054.1          | -                           | -                               |
| GF0030827 | 1                            | 0                        | 0                            | 0 Hypothetical protein (1)                                            |                                                                                                                                                                                                        |                                                                                                                                                                              | scaffold_6_mRNA_1053.1          | -                           | -                               |
| GF0030826 | 1                            | 0                        | 0                            | 0 Cytokinin riboside 5'-monophosphate phosphoribohydrolase (1)        |                                                                                                                                                                                                        | Cytokinin riboside 5'-monophosphate phosphoribohydrolase LOG [IPR005269] (1); LOG family [IPR031100] (1)                                                                     | scaffold_6_mRNA_1045.1          | -                           | -                               |
| GF0030825 | 1                            | 0                        | 0                            | 0 Hypothetical protein (1)                                            | catalytic activity [GO:0003824 molecular_function] (1); metabolic process [GO:0008152 biological_process] (1)                                                                                          | AMP-dependent synthetase/ligase [IPR000873] (1)                                                                                                                              | scaffold_6_mRNA_1044.1          | -                           | -                               |
| GF0030824 | 1                            | 0                        | 0                            | 0 Hypothetical protein (1)                                            |                                                                                                                                                                                                        |                                                                                                                                                                              | scaffold_6_mRNA_1043.1          | -                           | -                               |
| GF0030823 | 1                            | 0                        | 0                            | 0 Hypothetical protein (1)                                            |                                                                                                                                                                                                        | Reverse transcriptase domain [IPR000477] (1)                                                                                                                                 | scaffold_6_mRNA_104.1           | -                           | -                               |
| GF0030822 | 1                            | 0                        | 0                            | 0 Hypothetical protein (1)                                            |                                                                                                                                                                                                        |                                                                                                                                                                              | scaffold_6_mRNA_1039.1          | -                           | -                               |
| GF0030821 | 1                            | 0                        | 0                            | 0 Hypothetical protein (1)                                            | DNA binding [GO:0003677 molecular_function] (1); nucleic acid binding [GO:0003676 molecular_function] (1); protein dimerization activity [GO:0046983 molecular_function] (1)                           | Zinc finger C2H2-type [IPR013087] (1); Ribonuclease H-like domain [IPR012337] (1); Zinc finger, BED-type [IPR03656] (1); HAT, C-terminal dimerisation domain [IPR008906] (1) | scaffold_6_mRNA_1038.1          | -                           | -                               |
| GF0030820 | 1                            | 0                        | 0                            | 0 Hypothetical protein (1)                                            | transcription factor TFIIID complex [GO:0005669 cellular_component] (1); DNA-templated transcription, initiation [GO:0006352 biological_process] (1)                                                   | Transcription initiation factor TFIIID component TAF4 [IPR007900] (1)                                                                                                        | scaffold_6_mRNA_1036.1          | -                           | -                               |
| GF0030819 | 1                            | 0                        | 0                            | 0 Hypothetical protein (1)                                            |                                                                                                                                                                                                        |                                                                                                                                                                              | scaffold_6_mRNA_1031.1          | -                           | -                               |
| GF0030818 | 1                            | 0                        | 0                            | 0 Hypothetical protein (1)                                            |                                                                                                                                                                                                        |                                                                                                                                                                              | scaffold_6_mRNA_1026.1          | -                           | -                               |
| GF0030817 | 1                            | 0                        | 0                            | 0 Hypothetical protein (1)                                            |                                                                                                                                                                                                        |                                                                                                                                                                              | scaffold_6_mRNA_1025.1          | -                           | -                               |
| GF0030816 | 1                            | 0                        | 0                            | 0 Hypothetical protein (1)                                            |                                                                                                                                                                                                        |                                                                                                                                                                              | scaffold_6_mRNA_1020.1          | -                           | -                               |
| GF0030815 | 1                            | 0                        | 0                            | 0 Hypothetical protein (1)                                            |                                                                                                                                                                                                        |                                                                                                                                                                              | scaffold_6_mRNA_1017.1          | -                           | -                               |
| GF0030814 | 1                            | 0                        | 0                            | 0 Hypothetical protein (1)                                            | regulation of transcription, DNA-templated [GO:0006355 biological_process] (1)                                                                                                                         | FHY3/FAR1 family [IPR031052] (1)                                                                                                                                             | scaffold_6_mRNA_1013.1          | -                           | -                               |
| GF0030813 | 1                            | 0                        | 0                            | 0 General transcription factor-like zinc finger protein, putative (1) | nucleic acid binding [GO:0003676 molecular_function] (1); metabolic process [GO:0008152 biological_process] (1); transferase activity, transferring hexosyl groups [GO:0016758 molecular_function] (1) | Ribonuclease H-like domain [IPR012337] (1)                                                                                                                                   | scaffold_6_mRNA_1007.1          | -                           | -                               |
| GF0030812 | 1                            | 0                        | 0                            | 0 Hydroquinone glucosyltransferase (1)                                |                                                                                                                                                                                                        | UDP-glucuronosyl/UDP-glucosyltransferase [IPR002213] (1)                                                                                                                     | scaffold_6_mRNA_1005.1          | -                           | -                               |
| GF0030811 | 1                            | 0                        | 0                            | 0 Hypothetical protein (1)                                            |                                                                                                                                                                                                        |                                                                                                                                                                              | scaffold_6_mRNA_10.1            | -                           | -                               |
| GF0030810 | 1                            | 0                        | 0                            | 0 Hypothetical protein (1)                                            |                                                                                                                                                                                                        |                                                                                                                                                                              | scaffold_5_mRNA_991.1           | -                           | -                               |
| GF0030809 | 1                            | 0                        | 0                            | 0 Hypothetical protein (1)                                            |                                                                                                                                                                                                        |                                                                                                                                                                              | scaffold_5_mRNA_985.1           | -                           | -                               |
| GF0030808 | 1                            | 0                        | 0                            | 0 Putative disease resistance RPP13-like protein 1 (1)                | ADP binding [GO:0043531 molecular_function] (1)                                                                                                                                                        | P-loop containing nucleoside triphosphate hydrolase [IPR027417] (1); NB-ARC [IPR02182] (1); Leucine-rich repeat domain, L domain-like [IPR032675] (1)                        | scaffold_5_mRNA_98.1            | -                           | -                               |
| GF0030807 | 1                            | 0                        | 0                            | 0 Hypothetical protein (1)                                            |                                                                                                                                                                                                        |                                                                                                                                                                              | scaffold_5_mRNA_978.1           | -                           | -                               |
| GF0030806 | 1                            | 0                        | 0                            | 0 Hypothetical protein (1)                                            |                                                                                                                                                                                                        |                                                                                                                                                                              | scaffold_5_mRNA_975.1           | -                           | -                               |
| GF0030805 | 1                            | 0                        | 0                            | 0 Hypothetical protein (1)                                            |                                                                                                                                                                                                        |                                                                                                                                                                              | scaffold_5_mRNA_969.1           | -                           | -                               |
| GF0030804 | 1                            | 0                        | 0                            | 0 Hypothetical protein (1)                                            |                                                                                                                                                                                                        |                                                                                                                                                                              | scaffold_5_mRNA_959.1           | -                           | -                               |
| GF0030803 | 1                            | 0                        | 0                            | 0 Hypothetical protein (1)                                            | nucleic acid binding [GO:0003676 molecular_function] (1)                                                                                                                                               | Ribonuclease H-like domain [IPR012337] (1)                                                                                                                                   | scaffold_5_mRNA_955.1           | -                           | -                               |
| GF0030802 | 1                            | 0                        | 0                            | 0 Hypothetical protein (1)                                            |                                                                                                                                                                                                        |                                                                                                                                                                              | scaffold_5_mRNA_951.1           | -                           | -                               |
| GF0030801 | 1                            | 0                        | 0                            | 0 Hypothetical protein (1)                                            |                                                                                                                                                                                                        |                                                                                                                                                                              | scaffold_5_mRNA_938.1           | -                           | -                               |
| GF0030800 | 1                            | 0                        | 0                            | 0 Putative Rada gag-pol polyprotein (1)                               | zinc ion binding [GO:0008270 molecular_function] (1); nucleic acid binding [GO:0003676 molecular_function] (1)                                                                                         | Zinc finger, CCHC-type [IPR001878] (1)                                                                                                                                       | scaffold_5_mRNA_923.1           | -                           | -                               |
| GF0030799 | 1                            | 0                        | 0                            | 0 Hypothetical protein (1)                                            |                                                                                                                                                                                                        |                                                                                                                                                                              | scaffold_5_mRNA_922.1           | -                           | -                               |
| GF0030798 | 1                            | 0                        | 0                            | 0 Hypothetical protein (1)                                            |                                                                                                                                                                                                        |                                                                                                                                                                              | scaffold_5_mRNA_92.1            | -                           | -                               |
| GF0030797 | 1                            | 0                        | 0                            | 0 Hypothetical protein (1)                                            | enzyme inhibitor activity [GO:0004857 molecular_function] (1)                                                                                                                                          | Pectinesterase inhibitor domain [IPR006501] (1)                                                                                                                              | scaffold_5_mRNA_916.1           | -                           | -                               |
| GF0030796 | 1                            | 0                        | 0                            | 0 Orf764 protein (1)                                                  | DNA integration [GO:0015074 biological_process] (1); nucleic acid binding [GO:0003676 molecular_function] (1)                                                                                          | Integrase, catalytic core [IPR001584] (1); Ribonuclease H-like domain [IPR012337] (1)                                                                                        | scaffold_5_mRNA_908.1           | -                           | -                               |
| GF0030795 | 1                            | 0                        | 0                            | 0 Phloem protein 2-4B5 (1)                                            | protein binding [GO:0005515 molecular_function] (1)                                                                                                                                                    | Phloem protein 2-like [IPR025886] (1); F-box domain [IPR001810] (1)                                                                                                          | scaffold_5_mRNA_899.1           | -                           | -                               |
| GF0030794 | 1                            | 0                        | 0                            | 0 Hypothetical protein (1)                                            |                                                                                                                                                                                                        | Aspartic peptidase domain [IPR021109] (1)                                                                                                                                    | scaffold_5_mRNA_897.1           | -                           | -                               |
| GF0030793 | 1                            | 0                        | 0                            | 0 Hypothetical protein (1)                                            |                                                                                                                                                                                                        |                                                                                                                                                                              | scaffold_5_mRNA_893.1           | -                           | -                               |
| GF0030792 | 1                            | 0                        | 0                            | 0 Hypothetical protein (1)                                            | regulation of transcription, DNA-templated [GO:0006355 biological_process] (1); nucleic acid binding [GO:0003676 molecular_function] (1)                                                               | Carfavirus nucleic acid-binding protein [IPR02568] (1)                                                                                                                       | scaffold_5_mRNA_889.1           | -                           | -                               |
| GF0030791 | 1                            | 0                        | 0                            | 0 Cytokinin riboside 5'-monophosphate phosphoribohydrolase (1)        |                                                                                                                                                                                                        | LOG family [IPR031100] (1)                                                                                                                                                   | scaffold_5_mRNA_888.1           | -                           | -                               |
| GF0030790 | 1                            | 0                        | 0                            | 0 Hypothetical protein (1)                                            |                                                                                                                                                                                                        |                                                                                                                                                                              | scaffold_5_mRNA_886.1           | -                           | -                               |
| GF0030789 | 1                            | 0                        | 0                            | 0 Hypothetical protein (1)                                            |                                                                                                                                                                                                        |                                                                                                                                                                              | scaffold_5_mRNA_885.1           | -                           | -                               |
| GF0030788 | 1                            | 0                        | 0                            | 0 Cytokinin riboside 5'-monophosphate phosphoribohydrolase (1)        |                                                                                                                                                                                                        | Cytokinin riboside 5'-monophosphate phosphoribohydrolase LOG [IPR005269] (1); LOG family [IPR031100] (1)                                                                     | scaffold_5_mRNA_883.1           | -                           | -                               |
| GF0030787 | 1                            | 0                        | 0                            | 0 Hypothetical protein (1)                                            |                                                                                                                                                                                                        |                                                                                                                                                                              | scaffold_5_mRNA_882.1           | -                           | -                               |
| GF0030786 | 1                            | 0                        | 0                            | 0 Hypothetical protein (1)                                            |                                                                                                                                                                                                        |                                                                                                                                                                              | scaffold_5_mRNA_881.1           | -                           | -                               |
| GF0030785 | 1                            | 0                        | 0                            | 0 Hypothetical protein (1)                                            |                                                                                                                                                                                                        |                                                                                                                                                                              | scaffold_5_mRNA_880.1           | -                           | -                               |
| GF0030784 | 1                            | 0                        | 0                            | 0 Monosaccharide transport protein (1)                                |                                                                                                                                                                                                        |                                                                                                                                                                              | scaffold_5_mRNA_88.1            | -                           | -                               |
| GF0030783 | 1                            | 0                        | 0                            | 0 Hypothetical protein (1)                                            |                                                                                                                                                                                                        |                                                                                                                                                                              | scaffold_5_mRNA_878.1           | -                           | -                               |
| GF0030782 | 1                            | 0                        | 0                            | 0 Hypothetical protein (1)                                            |                                                                                                                                                                                                        |                                                                                                                                                                              | scaffold_5_mRNA_877.1           | -                           | -                               |
| GF0030781 | 1                            | 0                        | 0                            | 0 Hypothetical protein (1)                                            |                                                                                                                                                                                                        |                                                                                                                                                                              | scaffold_5_mRNA_876.1           | -                           | -                               |
| GF0030780 | 1                            | 0                        | 0                            | 0 Hypothetical protein (1)                                            |                                                                                                                                                                                                        |                                                                                                                                                                              | scaffold_5_mRNA_875.1           | -                           | -                               |
| GF0030779 | 1                            | 0                        | 0                            | 0 Hypothetical protein (1)                                            |                                                                                                                                                                                                        |                                                                                                                                                                              | scaffold_5_mRNA_871.1           | -                           | -                               |
| GF0030778 | 1                            | 0                        | 0                            | 0 Hypothetical protein (1)                                            | nucleic acid binding [GO:0003676 molecular_function] (1); protein dimerization activity [GO:0046983 molecular_function] (1)                                                                            | HAT, C-terminal dimerisation domain [IPR008906] (1); Ribonuclease H-like domain [IPR012337] (1)                                                                              | scaffold_5_mRNA_87.1            | -                           | -                               |
| GF0030777 | 1                            | 0                        | 0                            | 0 Ubiquitin carboxyl-terminal hydrolase 12 (1)                        | protein binding [GO:0005515 molecular_function] (1)                                                                                                                                                    | MATH/TRAF domain [IPR002083] (1); TRAF-like [IPR008974] (1)                                                                                                                  | scaffold_5_mRNA_868.1           | -                           | -                               |
| GF0030776 | 1                            | 0                        | 0                            | 0 Hypothetical protein (1)                                            |                                                                                                                                                                                                        | Reverse transcriptase, RNA-dependent DNA polymerase [IPR013103] (1)                                                                                                          | scaffold_5_mRNA_863.1           | -                           | -                               |
| GF0030775 | 1                            | 0                        | 0                            | 0 Cytokinin riboside 5'-monophosphate phosphoribohydrolase (1)        |                                                                                                                                                                                                        | LOG family [IPR031100] (1)                                                                                                                                                   | scaffold_5_mRNA_862.1           | -                           | -                               |
| GF0030774 | 1                            | 0                        | 0                            | 0 Hypothetical protein (1)                                            |                                                                                                                                                                                                        |                                                                                                                                                                              | scaffold_5_mRNA_860.1           | -                           | -                               |
| GF0030773 | 1                            | 0                        | 0                            | 0 Hypothetical protein (1)                                            | nucleic acid binding [GO:0003676 molecular_function] (1)                                                                                                                                               | Endonuclease/exonuclease/phosphatase [IPR005125] (1); Ribonuclease H-like domain [IPR012337] (1); Domain of unknown function DU4283 [IPR025558] (1)                          | scaffold_5_mRNA_86.1            | -                           | -                               |
| GF0030772 | 1                            | 0                        | 0                            | 0 Hypothetical protein (1)                                            |                                                                                                                                                                                                        |                                                                                                                                                                              | scaffold_5_mRNA_858.1           | -                           | -                               |
| GF0030771 | 1                            | 0                        | 0                            | 0 Hypothetical protein (1)                                            |                                                                                                                                                                                                        |                                                                                                                                                                              | scaffold_5_mRNA_855.1           | -                           | -                               |
| GF0030770 | 1                            | 0                        | 0                            | 0 Hypothetical protein (1)                                            |                                                                                                                                                                                                        |                                                                                                                                                                              | scaffold_5_mRNA_854.1           | -                           | -                               |
| GF0030769 | 1                            | 0                        | 0                            | 0 Hypothetical protein (1)                                            |                                                                                                                                                                                                        |                                                                                                                                                                              | scaffold_5_mRNA_852.1           | -                           | -                               |



| ID        | Num. in <i>C. clementinae</i> | Num. in <i>C. uchiha</i> | Num. in <i>P. trifoliata</i> | Note                                                             | GO                                                                                                                                                                                                                                                                                                                | InterPro                                                                                                                                                                                                                                                                                                                                             | Members in <i>C. clementinae</i> | Members in <i>C. uchiha</i> | Members in <i>P. trifoliata</i> |
|-----------|-------------------------------|--------------------------|------------------------------|------------------------------------------------------------------|-------------------------------------------------------------------------------------------------------------------------------------------------------------------------------------------------------------------------------------------------------------------------------------------------------------------|------------------------------------------------------------------------------------------------------------------------------------------------------------------------------------------------------------------------------------------------------------------------------------------------------------------------------------------------------|----------------------------------|-----------------------------|---------------------------------|
| GF0030768 | 1                             | 0                        | 0                            | 0 Hypothetical protein (1)                                       | protein binding [GO:0005515 molecular_function] (1)                                                                                                                                                                                                                                                               | MATH/TRAF domain [IPR002083] (1); TRAF-like [IPR008974] (1); Ribonuclease-like [IPR020656] (1)                                                                                                                                                                                                                                                       | scaffold_5_mRNA_850.1            | -                           | -                               |
| GF0030767 | 1                             | 0                        | 0                            | 0 Hypothetical protein (1)                                       | zinc ion binding [GO:0008270 molecular_function] (1); nucleic acid binding [GO:0003676 molecular_function] (1)                                                                                                                                                                                                    | Zinc finger, CCHC-type [IPR001878] (1); Reverse transcriptase, RNA-dependent DNA polymerase [IPR013103] (1)                                                                                                                                                                                                                                          | scaffold_5_mRNA_849.1            | -                           | -                               |
| GF0030766 | 1                             | 0                        | 0                            | 0 Hypothetical protein (1)                                       |                                                                                                                                                                                                                                                                                                                   |                                                                                                                                                                                                                                                                                                                                                      | scaffold_5_mRNA_847.1            | -                           | -                               |
| GF0030765 | 1                             | 0                        | 0                            | 0 Hypothetical protein (1)                                       |                                                                                                                                                                                                                                                                                                                   |                                                                                                                                                                                                                                                                                                                                                      | scaffold_5_mRNA_828.1            | -                           | -                               |
| GF0030764 | 1                             | 0                        | 0                            | 0 Hypothetical protein (1)                                       |                                                                                                                                                                                                                                                                                                                   | Arabidopsis retrotransposon Orf1 [IPR004312] (1)                                                                                                                                                                                                                                                                                                     | scaffold_5_mRNA_825.1            | -                           | -                               |
| GF0030763 | 1                             | 0                        | 0                            | 0 Hypothetical protein (1)                                       | zinc ion binding [GO:0008270 molecular_function] (1); nucleic acid binding [GO:0003676 molecular_function] (1)                                                                                                                                                                                                    | Zinc finger, CCHC-type [IPR001878] (1); Aspartic peptidase domain [IPR021109] (1)                                                                                                                                                                                                                                                                    | scaffold_5_mRNA_824.1            | -                           | -                               |
| GF0030762 | 1                             | 0                        | 0                            | 0 Hypothetical protein (1)                                       |                                                                                                                                                                                                                                                                                                                   |                                                                                                                                                                                                                                                                                                                                                      | scaffold_5_mRNA_822.1            | -                           | -                               |
| GF0030761 | 1                             | 0                        | 0                            | 0 Hypothetical protein (1)                                       | protein binding [GO:0005515 molecular_function] (1)                                                                                                                                                                                                                                                               | TRAF-like [IPR008974] (1); MATH/TRAF domain [IPR002083] (1)                                                                                                                                                                                                                                                                                          | scaffold_5_mRNA_820.1            | -                           | -                               |
| GF0030760 | 1                             | 0                        | 0                            | 0 Hypothetical protein (1)                                       |                                                                                                                                                                                                                                                                                                                   |                                                                                                                                                                                                                                                                                                                                                      | scaffold_5_mRNA_82.1             | -                           | -                               |
| GF0030759 | 1                             | 0                        | 0                            | 0 Hypothetical protein (1)                                       |                                                                                                                                                                                                                                                                                                                   |                                                                                                                                                                                                                                                                                                                                                      | scaffold_5_mRNA_819.1            | -                           | -                               |
| GF0030758 | 1                             | 0                        | 0                            | 0 Cytokinin riboside 5'-monophosphate phosphoribohydrolase (1)   |                                                                                                                                                                                                                                                                                                                   | LOG family [IPR031100] (1); Cytokinin riboside 5'-monophosphate phosphoribohydrolase LOG [IPR005269] (1)                                                                                                                                                                                                                                             | scaffold_5_mRNA_818.1            | -                           | -                               |
| GF0030757 | 1                             | 0                        | 0                            | 0 Hypothetical protein (1)                                       |                                                                                                                                                                                                                                                                                                                   |                                                                                                                                                                                                                                                                                                                                                      | scaffold_5_mRNA_815.1            | -                           | -                               |
| GF0030756 | 1                             | 0                        | 0                            | 0 Cytokinin riboside 5'-monophosphate phosphoribohydrolase (1)   |                                                                                                                                                                                                                                                                                                                   | LOG family [IPR031100] (1)                                                                                                                                                                                                                                                                                                                           | scaffold_5_mRNA_814.1            | -                           | -                               |
| GF0030755 | 1                             | 0                        | 0                            | 0 Hypothetical protein (1)                                       | regulation of transcription, DNA-templated [GO:0006355 biological_process] (1); nucleic acid binding [GO:0003676 molecular_function] (1)                                                                                                                                                                          | Carlavirin nucleic acid-binding protein [IPR025688] (1)                                                                                                                                                                                                                                                                                              | scaffold_5_mRNA_813.1            | -                           | -                               |
| GF0030754 | 1                             | 0                        | 0                            | 0 Hypothetical protein (1)                                       |                                                                                                                                                                                                                                                                                                                   |                                                                                                                                                                                                                                                                                                                                                      | scaffold_5_mRNA_812.1            | -                           | -                               |
| GF0030753 | 1                             | 0                        | 0                            | 0 Hypothetical protein (1)                                       |                                                                                                                                                                                                                                                                                                                   |                                                                                                                                                                                                                                                                                                                                                      | scaffold_5_mRNA_808.1            | -                           | -                               |
| GF0030752 | 1                             | 0                        | 0                            | 0 Disease resistance protein (TIR-NBS-LRR class) (1)             | signal transduction [GO:0007165 biological_process] (1); ADP binding [GO:0043531 molecular_function] (1); protein binding [GO:0005515 molecular_function] (1)                                                                                                                                                     | NB-ARC [IPR002182] (1); P-loop containing nucleoside triphosphate hydrolase [IPR027417] (1); Toll interleukin-1 receptor homology (TIR) domain [IPR000157] (1); Leucine-rich repeat [IPR001611] (1); Leucine-rich repeat domain, L domain-like [IPR032675] (1)                                                                                       | scaffold_5_mRNA_803.1            | -                           | -                               |
| GF0030751 | 1                             | 0                        | 0                            | 0 TMV resistance N (1)                                           | protein binding [GO:0005515 molecular_function] (1)                                                                                                                                                                                                                                                               | Leucine-rich repeat [IPR001611] (1); Leucine-rich repeat domain, L domain-like [IPR032675] (1)                                                                                                                                                                                                                                                       | scaffold_5_mRNA_802.1            | -                           | -                               |
| GF0030750 | 1                             | 0                        | 0                            | 0 Hypothetical protein (1)                                       |                                                                                                                                                                                                                                                                                                                   |                                                                                                                                                                                                                                                                                                                                                      | scaffold_5_mRNA_80.1             | -                           | -                               |
| GF0030749 | 1                             | 0                        | 0                            | 0 Hypothetical protein (1)                                       |                                                                                                                                                                                                                                                                                                                   |                                                                                                                                                                                                                                                                                                                                                      | scaffold_5_mRNA_8.1              | -                           | -                               |
| GF0030748 | 1                             | 0                        | 0                            | 0 Hypothetical protein (1)                                       |                                                                                                                                                                                                                                                                                                                   |                                                                                                                                                                                                                                                                                                                                                      | scaffold_5_mRNA_795.1            | -                           | -                               |
| GF0030747 | 1                             | 0                        | 0                            | 0 Hypothetical protein (1)                                       |                                                                                                                                                                                                                                                                                                                   | Gcp-like domain [IPR000905] (1)                                                                                                                                                                                                                                                                                                                      | scaffold_5_mRNA_79.1             | -                           | -                               |
| GF0030746 | 1                             | 0                        | 0                            | 0 Polypeptide with an integrase domain (1)                       | DNA integration [GO:0015074 biological_process] (1); ADP binding [GO:0003676 molecular_function] (1)                                                                                                                                                                                                              | GAG-pre-integrase domain [IPR025724] (1); Integrase, catalytic core [IPR001584] (1); Ribonuclease H-like domain [IPR012337] (1)                                                                                                                                                                                                                      | scaffold_5_mRNA_784.1            | -                           | -                               |
| GF0030745 | 1                             | 0                        | 0                            | 0 Hypothetical protein (1)                                       | zinc ion binding [GO:0008270 molecular_function] (1); nucleic acid binding [GO:0003676 molecular_function] (1)                                                                                                                                                                                                    | Zinc finger, CCHC-type [IPR001878] (1)                                                                                                                                                                                                                                                                                                               | scaffold_5_mRNA_783.1            | -                           | -                               |
| GF0030744 | 1                             | 0                        | 0                            | 0 Hypothetical protein (1)                                       |                                                                                                                                                                                                                                                                                                                   |                                                                                                                                                                                                                                                                                                                                                      | scaffold_5_mRNA_768.1            | -                           | -                               |
| GF0030743 | 1                             | 0                        | 0                            | 0 Contains similarity to reverse transcriptase-related (1)       | nucleic acid binding [GO:0003676 molecular_function] (1)                                                                                                                                                                                                                                                          | Ribonuclease H-like domain [IPR012337] (1)                                                                                                                                                                                                                                                                                                           | scaffold_5_mRNA_766.1            | -                           | -                               |
| GF0030742 | 1                             | 0                        | 0                            | 0 Hypothetical protein (1)                                       | nucleic acid binding [GO:0003676 molecular_function] (1)                                                                                                                                                                                                                                                          | Reverse transcriptase zinc-binding domain [IPR026960] (1); Ribonuclease H-like domain [IPR012337] (1)                                                                                                                                                                                                                                                | scaffold_5_mRNA_764.1            | -                           | -                               |
| GF0030741 | 1                             | 0                        | 0                            | 0 Hypothetical protein (1)                                       |                                                                                                                                                                                                                                                                                                                   |                                                                                                                                                                                                                                                                                                                                                      | scaffold_5_mRNA_762.1            | -                           | -                               |
| GF0030740 | 1                             | 0                        | 0                            | 0 Hypothetical protein (1)                                       |                                                                                                                                                                                                                                                                                                                   | Leucine-rich repeat domain, L domain-like [IPR032675] (1)                                                                                                                                                                                                                                                                                            | scaffold_5_mRNA_758.1            | -                           | -                               |
| GF0030739 | 1                             | 0                        | 0                            | 0 Disease resistance protein RPM1 (1)                            | ADP binding [GO:0043531 molecular_function] (1)                                                                                                                                                                                                                                                                   | Winged helix-turn-helix DNA-binding domain [IPR011991] (1); Leucine-rich repeat domain, L domain-like [IPR032675] (1); NB-ARC [IPR002182] (1); P-loop containing nucleoside triphosphate hydrolase [IPR027417] (1)                                                                                                                                   | scaffold_5_mRNA_755.1            | -                           | -                               |
| GF0030738 | 1                             | 0                        | 0                            | 0 Hypothetical protein (1)                                       |                                                                                                                                                                                                                                                                                                                   |                                                                                                                                                                                                                                                                                                                                                      | scaffold_5_mRNA_753.1            | -                           | -                               |
| GF0030737 | 1                             | 0                        | 0                            | 0 Hypothetical protein (1)                                       |                                                                                                                                                                                                                                                                                                                   |                                                                                                                                                                                                                                                                                                                                                      | scaffold_5_mRNA_744.1            | -                           | -                               |
| GF0030736 | 1                             | 0                        | 0                            | 0 Hypothetical protein (1)                                       |                                                                                                                                                                                                                                                                                                                   |                                                                                                                                                                                                                                                                                                                                                      | scaffold_5_mRNA_741.1            | -                           | -                               |
| GF0030735 | 1                             | 0                        | 0                            | 0 Hypothetical protein (1)                                       |                                                                                                                                                                                                                                                                                                                   |                                                                                                                                                                                                                                                                                                                                                      | scaffold_5_mRNA_740.1            | -                           | -                               |
| GF0030734 | 1                             | 0                        | 0                            | 0 Hypothetical protein (1)                                       |                                                                                                                                                                                                                                                                                                                   |                                                                                                                                                                                                                                                                                                                                                      | scaffold_5_mRNA_74.1             | -                           | -                               |
| GF0030733 | 1                             | 0                        | 0                            | 0 Transcription repressor TRM protein (1)                        | nucleic acid binding [GO:0003676 molecular_function] (1)                                                                                                                                                                                                                                                          | Zinc finger, RINGFYVE/PHD-type [IPR013083] (1); Zinc finger C2H2-type [IPR013087] (1)                                                                                                                                                                                                                                                                | scaffold_5_mRNA_736.1            | -                           | -                               |
| GF0030732 | 1                             | 0                        | 0                            | 0 Hypothetical protein (1)                                       |                                                                                                                                                                                                                                                                                                                   |                                                                                                                                                                                                                                                                                                                                                      | scaffold_5_mRNA_728.1            | -                           | -                               |
| GF0030731 | 1                             | 0                        | 0                            | 0 Polynucleotidyl transferase, Ribonuclease H fold, putative (1) |                                                                                                                                                                                                                                                                                                                   |                                                                                                                                                                                                                                                                                                                                                      | scaffold_5_mRNA_712.1            | -                           | -                               |
| GF0030730 | 1                             | 0                        | 0                            | 0 Hypothetical protein (1)                                       |                                                                                                                                                                                                                                                                                                                   | Retrotransposon gag domain [IPR005162] (1)                                                                                                                                                                                                                                                                                                           | scaffold_5_mRNA_711.1            | -                           | -                               |
| GF0030729 | 1                             | 0                        | 0                            | 0 Hypothetical protein (1)                                       |                                                                                                                                                                                                                                                                                                                   | Domain of unknown function DUF1605 [IPR011709] (1)                                                                                                                                                                                                                                                                                                   | scaffold_5_mRNA_704.1            | -                           | -                               |
| GF0030728 | 1                             | 0                        | 0                            | 0 Hypothetical protein (1)                                       |                                                                                                                                                                                                                                                                                                                   |                                                                                                                                                                                                                                                                                                                                                      | scaffold_5_mRNA_703.1            | -                           | -                               |
| GF0030727 | 1                             | 0                        | 0                            | 0 Ovicidal O-methyltransferase (1)                               | methyltransferase activity [GO:0008168 molecular_function] (1); O-methyltransferase activity [GO:0008171 molecular_function] (1)                                                                                                                                                                                  | O-methyltransferase, family 2 [IPR010771] (1); O-methyltransferase COM-type [IPR016461] (1); S-adenosyl-L-methionine-dependent methyltransferase [IPR020663] (1)                                                                                                                                                                                     | scaffold_5_mRNA_700.1            | -                           | -                               |
| GF0030726 | 1                             | 0                        | 0                            | 0 Hypothetical protein (1)                                       |                                                                                                                                                                                                                                                                                                                   |                                                                                                                                                                                                                                                                                                                                                      | scaffold_5_mRNA_696.1            | -                           | -                               |
| GF0030725 | 1                             | 0                        | 0                            | 0 40S ribosomal protein S2 (1)                                   | translation [GO:0006412 biological_process] (1); structural constituent of ribosome [GO:0003735 molecular_function] (1); RNA binding [GO:0003723 molecular_function] (1); ribosome [GO:0005840 cellular_component] (1); small ribosomal subunit [GO:0015935 cellular_component] (1)                               | Ribosomal protein S2 domain 2-type fold, subgroup [IPR014721] (1); Ribosomal protein S5, eukaryotic archaeal [IPR005711] (1); Ribosomal protein S5, N-terminal [IPR013810] (1); Ribosomal protein S5, C-terminal [IPR005324] (1); Ribosomal protein S5 domain 2-type fold [IPR020568] (1); Ribosomal protein S5 (rps05a<sup>1</sup>) [IPR021109] (1) | scaffold_5_mRNA_695.1            | -                           | -                               |
| GF0030724 | 1                             | 0                        | 0                            | 0 Hypothetical protein (1)                                       |                                                                                                                                                                                                                                                                                                                   | Aspartic peptidase domain [IPR021109] (1)                                                                                                                                                                                                                                                                                                            | scaffold_5_mRNA_694.1            | -                           | -                               |
| GF0030723 | 1                             | 0                        | 0                            | 0 Hypothetical protein (1)                                       |                                                                                                                                                                                                                                                                                                                   |                                                                                                                                                                                                                                                                                                                                                      | scaffold_5_mRNA_690.1            | -                           | -                               |
| GF0030722 | 1                             | 0                        | 0                            | 0 Serine/threonine-protein kinase PHS1 (1)                       |                                                                                                                                                                                                                                                                                                                   |                                                                                                                                                                                                                                                                                                                                                      | scaffold_5_mRNA_688.1            | -                           | -                               |
| GF0030721 | 1                             | 0                        | 0                            | 0 NBS-LRR class resistance protein Fy1-BY1 (1)                   | ADP binding [GO:0043531 molecular_function] (1)                                                                                                                                                                                                                                                                   | P-loop containing nucleoside triphosphate hydrolase [IPR027417] (1); NB-ARC [IPR002182] (1); Winged helix-turn-helix DNA-binding domain [IPR011991] (1); Leucine-rich repeat domain, L domain-like [IPR032675] (1)                                                                                                                                   | scaffold_5_mRNA_686.1            | -                           | -                               |
| GF0030720 | 1                             | 0                        | 0                            | 0 Disease resistance protein RPM1 (1)                            | ADP binding [GO:0043531 molecular_function] (1)                                                                                                                                                                                                                                                                   | Winged helix-turn-helix DNA-binding domain [IPR011991] (1); Leucine-rich repeat domain, L domain-like [IPR032675] (1); NB-ARC [IPR002182] (1); P-loop containing nucleoside triphosphate hydrolase [IPR027417] (1)                                                                                                                                   | scaffold_5_mRNA_684.1            | -                           | -                               |
| GF0030719 | 1                             | 0                        | 0                            | 0 Hypothetical protein (1)                                       |                                                                                                                                                                                                                                                                                                                   |                                                                                                                                                                                                                                                                                                                                                      | scaffold_5_mRNA_683.1            | -                           | -                               |
| GF0030718 | 1                             | 0                        | 0                            | 0 Hypothetical protein (1)                                       |                                                                                                                                                                                                                                                                                                                   |                                                                                                                                                                                                                                                                                                                                                      | scaffold_5_mRNA_681.1            | -                           | -                               |
| GF0030717 | 1                             | 0                        | 0                            | 0 Hypothetical protein (1)                                       |                                                                                                                                                                                                                                                                                                                   |                                                                                                                                                                                                                                                                                                                                                      | scaffold_5_mRNA_680.1            | -                           | -                               |
| GF0030716 | 1                             | 0                        | 0                            | 0 Hypothetical protein (1)                                       |                                                                                                                                                                                                                                                                                                                   |                                                                                                                                                                                                                                                                                                                                                      | scaffold_5_mRNA_68.1             | -                           | -                               |
| GF0030715 | 1                             | 0                        | 0                            | 0 Hypothetical protein (1)                                       |                                                                                                                                                                                                                                                                                                                   |                                                                                                                                                                                                                                                                                                                                                      | scaffold_5_mRNA_677.1            | -                           | -                               |
| GF0030714 | 1                             | 0                        | 0                            | 0 Cytochrome P450 82A4 (1)                                       | iron ion binding [GO:0005506 molecular_function] (1); heme binding [GO:0020037 molecular_function] (1); oxidation-reduction process [GO:005114 biological_process] (1); oxidoreductase activity, acting on proton donors, with incorporation or reduction of molecular oxygen [GO:0016705 molecular_function] (1) | Cytochrome P450 [IPR001120] (1); Cytochrome P450, conserved site [IPR017972] (1); Cytochrome P450, E-class, group I [IPR002401] (1)                                                                                                                                                                                                                  | scaffold_5_mRNA_660.1            | -                           | -                               |
| GF0030713 | 1                             | 0                        | 0                            | 0 Hypothetical protein (1)                                       |                                                                                                                                                                                                                                                                                                                   |                                                                                                                                                                                                                                                                                                                                                      | scaffold_5_mRNA_659.1            | -                           | -                               |
| GF0030712 | 1                             | 0                        | 0                            | 0 Hypothetical protein (1)                                       |                                                                                                                                                                                                                                                                                                                   |                                                                                                                                                                                                                                                                                                                                                      | scaffold_5_mRNA_651.1            | -                           | -                               |
| GF0030711 | 1                             | 0                        | 0                            | 0 Hypothetical protein (1)                                       |                                                                                                                                                                                                                                                                                                                   |                                                                                                                                                                                                                                                                                                                                                      | scaffold_5_mRNA_643.1            | -                           | -                               |
| GF0030710 | 1                             | 0                        | 0                            | 0 Hypothetical protein (1)                                       |                                                                                                                                                                                                                                                                                                                   |                                                                                                                                                                                                                                                                                                                                                      | scaffold_5_mRNA_640.1            | -                           | -                               |
| GF0030709 | 1                             | 0                        | 0                            | 0 Hypothetical protein (1)                                       |                                                                                                                                                                                                                                                                                                                   |                                                                                                                                                                                                                                                                                                                                                      | scaffold_5_mRNA_634.1            | -                           | -                               |
| GF0030708 | 1                             | 0                        | 0                            | 0 Hypothetical protein (1)                                       |                                                                                                                                                                                                                                                                                                                   |                                                                                                                                                                                                                                                                                                                                                      | scaffold_5_mRNA_632.1            | -                           | -                               |
| GF0030707 | 1                             | 0                        | 0                            | 0 Hypothetical protein (1)                                       |                                                                                                                                                                                                                                                                                                                   |                                                                                                                                                                                                                                                                                                                                                      | scaffold_5_mRNA_630.1            | -                           | -                               |
| GF0030706 | 1                             | 0                        | 0                            | 0 LRR and NB-ARC domain disease resistance protein (1)           | ADP binding [GO:0043531 molecular_function] (1)                                                                                                                                                                                                                                                                   | NB-ARC [IPR002182] (1); P-loop containing nucleoside triphosphate hydrolase [IPR027417] (1); Winged helix-turn-helix DNA-binding domain [IPR011991] (1); Leucine-rich repeat domain, L domain-like [IPR032675] (1)                                                                                                                                   | scaffold_5_mRNA_63.1             | -                           | -                               |

| ID        | Num. in <i>C. clementiae</i> | Num. in <i>C. uchiha</i> | Num. in <i>P. trifoliata</i> | Note                                                         | GO                                                                                                                                                                                                                                                                                                                                                          | InterPro                                                                                                                                                                                                                                                                                                                                        | Members in <i>C. clementiae</i> | Members in <i>C. uchiha</i> | Members in <i>P. trifoliata</i> |
|-----------|------------------------------|--------------------------|------------------------------|--------------------------------------------------------------|-------------------------------------------------------------------------------------------------------------------------------------------------------------------------------------------------------------------------------------------------------------------------------------------------------------------------------------------------------------|-------------------------------------------------------------------------------------------------------------------------------------------------------------------------------------------------------------------------------------------------------------------------------------------------------------------------------------------------|---------------------------------|-----------------------------|---------------------------------|
| GF0030705 | 1                            | 0                        | 0                            | Cytokinin riboside 5'-monophosphate phosphoribohydrolase (1) |                                                                                                                                                                                                                                                                                                                                                             | Cytokinin riboside 5'-monophosphate phosphoribohydrolase LOG [IPR005269] (1); LOG family [IPR031100] (1)                                                                                                                                                                                                                                        | scaffold_5_mRNA_629.1           | -                           | -                               |
| GF0030704 | 1                            | 0                        | 0                            | Hypothetical protein (1)                                     |                                                                                                                                                                                                                                                                                                                                                             |                                                                                                                                                                                                                                                                                                                                                 | scaffold_5_mRNA_626.1           | -                           | -                               |
| GF0030703 | 1                            | 0                        | 0                            | Hypothetical protein (1)                                     |                                                                                                                                                                                                                                                                                                                                                             |                                                                                                                                                                                                                                                                                                                                                 | scaffold_5_mRNA_606.1           | -                           | -                               |
| GF0030702 | 1                            | 0                        | 0                            | Hypothetical protein (1)                                     |                                                                                                                                                                                                                                                                                                                                                             |                                                                                                                                                                                                                                                                                                                                                 | scaffold_5_mRNA_603.1           | -                           | -                               |
| GF0030701 | 1                            | 0                        | 0                            | Cytokinin riboside 5'-monophosphate phosphoribohydrolase (1) |                                                                                                                                                                                                                                                                                                                                                             | LOG family [IPR031100] (1); Cytokinin riboside 5'-monophosphate phosphoribohydrolase LOG [IPR005269] (1)                                                                                                                                                                                                                                        | scaffold_5_mRNA_602.1           | -                           | -                               |
| GF0030700 | 1                            | 0                        | 0                            | FAD-binding Berberine family protein (1)                     | flavin adenine dinucleotide binding [GO:0050660 molecular_function] (1); oxidoreductase activity [GO:0016491 molecular_function] (1); oxidation-reduction process [GO:0055114 biological_process] (1); oxidoreductase activity, acting on CH-OH group of donors [GO:0016614 molecular_function] (1); catalytic activity [GO:0003824 molecular_function] (1) | Berberine/berberine-like [IPR012951] (1); CO dehydrogenase flavoprotein-like, FAD-binding, subdomain 2 [IPR016169] (1); FAD-binding, type 2, subdomain 1 [IPR016167] (1); Oxygen oxidoreductase covalent FAD-binding site [IPR006093] (1); FAD-binding, type 2 [IPR016166] (1); FAD linked oxidase, N-terminal [IPR006094] (1)                  | scaffold_5_mRNA_593.1           | -                           | -                               |
| GF0030699 | 1                            | 0                        | 0                            | Hypothetical protein (1)                                     |                                                                                                                                                                                                                                                                                                                                                             |                                                                                                                                                                                                                                                                                                                                                 | scaffold_5_mRNA_592.1           | -                           | -                               |
| GF0030698 | 1                            | 0                        | 0                            | Hypothetical protein (1)                                     |                                                                                                                                                                                                                                                                                                                                                             |                                                                                                                                                                                                                                                                                                                                                 | scaffold_5_mRNA_591.1           | -                           | -                               |
| GF0030697 | 1                            | 0                        | 0                            | Hypothetical protein (1)                                     |                                                                                                                                                                                                                                                                                                                                                             |                                                                                                                                                                                                                                                                                                                                                 | scaffold_5_mRNA_590.1           | -                           | -                               |
| GF0030696 | 1                            | 0                        | 0                            | Hypothetical protein (1)                                     |                                                                                                                                                                                                                                                                                                                                                             |                                                                                                                                                                                                                                                                                                                                                 | scaffold_5_mRNA_589.1           | -                           | -                               |
| GF0030695 | 1                            | 0                        | 0                            | Hypothetical protein (1)                                     | oxidoreductase activity, acting on CH-OH group of donors [GO:0016614 molecular_function] (1); catalytic activity [GO:0003824 molecular_function] (1)                                                                                                                                                                                                        | Leucine-rich repeat domain, L domain-like [IPR032675] (1); CO dehydrogenase flavoprotein-like, FAD-binding, subdomain 2 [IPR016169] (1); FAD-binding, type 2, subdomain 1 [IPR016167] (1); Oxygen oxidoreductase covalent FAD-binding site [IPR006093] (1); FAD-binding, type 2 [IPR016166] (1); FAD linked oxidase, N-terminal [IPR006094] (1) | scaffold_5_mRNA_585.1           | -                           | -                               |
| GF0030694 | 1                            | 0                        | 0                            | Hypothetical protein (1)                                     |                                                                                                                                                                                                                                                                                                                                                             |                                                                                                                                                                                                                                                                                                                                                 | scaffold_5_mRNA_567.1           | -                           | -                               |
| GF0030693 | 1                            | 0                        | 0                            | Hypothetical protein (1)                                     | calcium ion binding [GO:0005509 molecular_function] (1)                                                                                                                                                                                                                                                                                                     | EGF-like calcium-binding domain [IPR001881] (1)                                                                                                                                                                                                                                                                                                 | scaffold_5_mRNA_564.1           | -                           | -                               |
| GF0030692 | 1                            | 0                        | 0                            | Disease resistance protein (1)                               | protein binding [GO:0005515 molecular_function] (1); ADP binding [GO:0043531 molecular_function] (1)                                                                                                                                                                                                                                                        | P-loop containing nucleoside triphosphate hydrolase [IPR027417] (1); NB-ARC [IPR012132] (1); Leucine-rich repeat [IPR001611] (1); Winged helix-turn-helix DNA-binding domain [IPR011991] (1); Leucine-rich repeat domain, L domain-like [IPR032675] (1)                                                                                         | scaffold_5_mRNA_550.1           | -                           | -                               |
| GF0030691 | 1                            | 0                        | 0                            | Hypothetical protein (1)                                     |                                                                                                                                                                                                                                                                                                                                                             |                                                                                                                                                                                                                                                                                                                                                 | scaffold_5_mRNA_549.1           | -                           | -                               |
| GF0030690 | 1                            | 0                        | 0                            | Putative pectinesterase/pectinesterase inhibitor 38 (1)      | pectinesterase activity [GO:0030599 molecular_function] (1); cell wall [GO:0005518 cellular_component] (1); cell wall modification [GO:0042545 biological_process] (1)                                                                                                                                                                                      | Pectin lyase tota virulence factor [IPR011050] (1); Pectin lyase fold [IPR012334] (1); Pectinesterase, catalytic [IPR000070] (1); Pectinesterase, Asp active site [IPR031311] (1); NB-ARC [IPR002182] (1); P-loop containing nucleoside triphosphate hydrolase [IPR027417] (1); Winged helix-turn-helix DNA-binding domain [IPR011991] (1)      | scaffold_5_mRNA_544.1           | -                           | -                               |
| GF0030689 | 1                            | 0                        | 0                            | Hypothetical protein (1)                                     | ADP binding [GO:0043531 molecular_function] (1)                                                                                                                                                                                                                                                                                                             |                                                                                                                                                                                                                                                                                                                                                 | scaffold_5_mRNA_543.1           | -                           | -                               |
| GF0030688 | 1                            | 0                        | 0                            | Hypothetical protein (1)                                     |                                                                                                                                                                                                                                                                                                                                                             |                                                                                                                                                                                                                                                                                                                                                 | scaffold_5_mRNA_542.1           | -                           | -                               |
| GF0030687 | 1                            | 0                        | 0                            | Hypothetical protein (1)                                     |                                                                                                                                                                                                                                                                                                                                                             |                                                                                                                                                                                                                                                                                                                                                 | scaffold_5_mRNA_541.1           | -                           | -                               |
| GF0030686 | 1                            | 0                        | 0                            | Hypothetical protein (1)                                     |                                                                                                                                                                                                                                                                                                                                                             |                                                                                                                                                                                                                                                                                                                                                 | scaffold_5_mRNA_540.1           | -                           | -                               |
| GF0030685 | 1                            | 0                        | 0                            | Hypothetical protein (1)                                     |                                                                                                                                                                                                                                                                                                                                                             |                                                                                                                                                                                                                                                                                                                                                 | scaffold_5_mRNA_539.1           | -                           | -                               |
| GF0030684 | 1                            | 0                        | 0                            | Hypothetical protein (1)                                     |                                                                                                                                                                                                                                                                                                                                                             |                                                                                                                                                                                                                                                                                                                                                 | scaffold_5_mRNA_533.1           | -                           | -                               |
| GF0030683 | 1                            | 0                        | 0                            | Hypothetical protein (1)                                     | enzyme inhibitor activity [GO:0004857 molecular_function] (1)                                                                                                                                                                                                                                                                                               | Pectinesterase inhibitor domain [IPR006501] (1)                                                                                                                                                                                                                                                                                                 | scaffold_5_mRNA_531.1           | -                           | -                               |
| GF0030682 | 1                            | 0                        | 0                            | Hypothetical protein (1)                                     |                                                                                                                                                                                                                                                                                                                                                             |                                                                                                                                                                                                                                                                                                                                                 | scaffold_5_mRNA_528.1           | -                           | -                               |
| GF0030681 | 1                            | 0                        | 0                            | Hypothetical protein (1)                                     | response to auxin [GO:0009733 biological_process] (1)                                                                                                                                                                                                                                                                                                       | Small auxin-up RNA [IPR003676] (1)                                                                                                                                                                                                                                                                                                              | scaffold_5_mRNA_5228.1          | -                           | -                               |
| GF0030680 | 1                            | 0                        | 0                            | Histone deacetylase 9 isoform 11 (1)                         |                                                                                                                                                                                                                                                                                                                                                             |                                                                                                                                                                                                                                                                                                                                                 | scaffold_5_mRNA_5220.1          | -                           | -                               |
| GF0030679 | 1                            | 0                        | 0                            | Hypothetical protein (1)                                     |                                                                                                                                                                                                                                                                                                                                                             |                                                                                                                                                                                                                                                                                                                                                 | scaffold_5_mRNA_5212.1          | -                           | -                               |
| GF0030678 | 1                            | 0                        | 0                            | Hypothetical protein (1)                                     | metabolic process [GO:0008152 biological_process] (1); transferase activity, transferring hexosyl groups [GO:0016758 molecular_function] (1)                                                                                                                                                                                                                | UDP-glucuronosyl UDP-glucosyltransferase [IPR002213] (1)                                                                                                                                                                                                                                                                                        | scaffold_5_mRNA_5204.1          | -                           | -                               |
| GF0030677 | 1                            | 0                        | 0                            | Putative disease resistance protein (1)                      |                                                                                                                                                                                                                                                                                                                                                             |                                                                                                                                                                                                                                                                                                                                                 | scaffold_5_mRNA_519.1           | -                           | -                               |
| GF0030676 | 1                            | 0                        | 0                            | RING-H2 finger protein ATLL1 (1)                             | zinc ion binding [GO:0008270 molecular_function] (1); protein binding [GO:0005515 molecular_function] (1)                                                                                                                                                                                                                                                   | Zinc finger, RING-type [IPR001841] (1); Zinc finger, RING-FYVE/PHD-type [IPR013083] (1)                                                                                                                                                                                                                                                         | scaffold_5_mRNA_5178.1          | -                           | -                               |
| GF0030675 | 1                            | 0                        | 0                            | Hypothetical protein (1)                                     |                                                                                                                                                                                                                                                                                                                                                             |                                                                                                                                                                                                                                                                                                                                                 | scaffold_5_mRNA_516.1           | -                           | -                               |
| GF0030674 | 1                            | 0                        | 0                            | Hypothetical protein (1)                                     |                                                                                                                                                                                                                                                                                                                                                             |                                                                                                                                                                                                                                                                                                                                                 | scaffold_5_mRNA_5149.1          | -                           | -                               |
| GF0030673 | 1                            | 0                        | 0                            | Hypothetical protein (1)                                     |                                                                                                                                                                                                                                                                                                                                                             |                                                                                                                                                                                                                                                                                                                                                 | scaffold_5_mRNA_5148.1          | -                           | -                               |
| GF0030672 | 1                            | 0                        | 0                            | Hypothetical protein (1)                                     |                                                                                                                                                                                                                                                                                                                                                             |                                                                                                                                                                                                                                                                                                                                                 | scaffold_5_mRNA_5146.1          | -                           | -                               |
| GF0030671 | 1                            | 0                        | 0                            | Hypothetical protein (1)                                     | zinc ion binding [GO:0008270 molecular_function] (1); nucleic acid binding [GO:0003676 molecular_function] (1)                                                                                                                                                                                                                                              | Zinc knuckle CX2CX4HX4C [IPR025836] (1); Zinc finger, CCHC-type [IPR001878] (1); Domain of unknown function DUF4283 [IPR025558] (1)                                                                                                                                                                                                             | scaffold_5_mRNA_511.1           | -                           | -                               |
| GF0030670 | 1                            | 0                        | 0                            | Heavy metal ATPase transporter (1)                           | cation transport [GO:0006812 biological_process] (1); metal ion binding [GO:0046872 molecular_function] (1); integral component of membrane [GO:0016021 cellular_component] (1); cation-transporting ATPase activity [GO:0019829 molecular_function] (1); nucleotide binding [GO:0000166 molecular_function] (1)                                            | HAD-like domain [IPR023214] (1); P-type ATPase, A domain [IPR008250] (1); P-type ATPase, subfamily IB [IPR027256] (1); P-type ATPase, phosphorylation site [IPR018303] (1); P-type ATPase, cytoplasmic domain N [IPR032991] (1); P-type ATPase, transmembrane domain [IPR032989] (1); P-type ATPase [IPR001757] (1)                             | scaffold_5_mRNA_510.1           | -                           | -                               |
| GF0030669 | 1                            | 0                        | 0                            | Enoyl-CoA hydratase 2, peroxisomal (1)                       | serine-type exopeptidase activity [GO:0070008 molecular_function] (1); serine-type endopeptidase activity [GO:0004252 molecular_function] (1)                                                                                                                                                                                                               | Msc-like domain [IPR002539] (1); HotDog domain [IPR029069] (1)                                                                                                                                                                                                                                                                                  | scaffold_5_mRNA_5099.1          | -                           | -                               |
| GF0030668 | 1                            | 0                        | 0                            | Prolyl endopeptidase (1)                                     |                                                                                                                                                                                                                                                                                                                                                             |                                                                                                                                                                                                                                                                                                                                                 | scaffold_5_mRNA_5097.1          | -                           | -                               |
| GF0030667 | 1                            | 0                        | 0                            | Hypothetical protein (1)                                     |                                                                                                                                                                                                                                                                                                                                                             |                                                                                                                                                                                                                                                                                                                                                 | scaffold_5_mRNA_5094.1          | -                           | -                               |
| GF0030666 | 1                            | 0                        | 0                            | Hypothetical protein (1)                                     |                                                                                                                                                                                                                                                                                                                                                             |                                                                                                                                                                                                                                                                                                                                                 | scaffold_5_mRNA_5083.1          | -                           | -                               |
| GF0030665 | 1                            | 0                        | 0                            | Flavonoid 3',5'-hydroxylase (1)                              | heme binding [GO:0020037 molecular_function] (1); iron ion binding [GO:0005506 molecular_function] (1); oxidoreductase activity, acting on paired donors, with incorporation or reduction of molecular oxygen [GO:0016705 molecular_function] (1); oxidation-reduction process [GO:0055114 biological_process] (1)                                          | Cytochrome P450, E-class, group I [IPR002401] (1); Cytochrome P450 [IPR001128] (1)                                                                                                                                                                                                                                                              | scaffold_5_mRNA_508.1           | -                           | -                               |
| GF0030664 | 1                            | 0                        | 0                            | Hypothetical protein (1)                                     | enzyme regulator activity [GO:0030234 molecular_function] (1); proteasome complex [GO:0000902 cellular_component] (1); regulation of protein catabolic process [GO:0042176 biological_process] (1)                                                                                                                                                          | 26S proteasome regulatory subunit, C-terminal [IPR013586] (1)                                                                                                                                                                                                                                                                                   | scaffold_5_mRNA_5071.1          | -                           | -                               |
| GF0030663 | 1                            | 0                        | 0                            | Hypothetical protein (1)                                     |                                                                                                                                                                                                                                                                                                                                                             |                                                                                                                                                                                                                                                                                                                                                 | scaffold_5_mRNA_5063.1          | -                           | -                               |
| GF0030662 | 1                            | 0                        | 0                            | Hypothetical protein (1)                                     | cysteine-type peptidase activity [GO:0008234 molecular_function] (1); proteolysis [GO:0006508 biological_process] (1)                                                                                                                                                                                                                                       | Upl1 protease family, C-terminal catalytic domain [IPR003653] (1)                                                                                                                                                                                                                                                                               | scaffold_5_mRNA_5058.1          | -                           | -                               |
| GF0030661 | 1                            | 0                        | 0                            | Hypothetical protein (1)                                     |                                                                                                                                                                                                                                                                                                                                                             |                                                                                                                                                                                                                                                                                                                                                 | scaffold_5_mRNA_504.1           | -                           | -                               |
| GF0030660 | 1                            | 0                        | 0                            | Hypothetical protein (1)                                     |                                                                                                                                                                                                                                                                                                                                                             |                                                                                                                                                                                                                                                                                                                                                 | scaffold_5_mRNA_5033.1          | -                           | -                               |
| GF0030659 | 1                            | 0                        | 0                            | Hypothetical protein (1)                                     | catalytic activity [GO:0003824 molecular_function] (1); ATP binding [GO:0005524 molecular_function] (1)                                                                                                                                                                                                                                                     | ATP-grasp fold, subdomain 1 [IPR013815] (1)                                                                                                                                                                                                                                                                                                     | scaffold_5_mRNA_5032.1          | -                           | -                               |
| GF0030658 | 1                            | 0                        | 0                            | Hypothetical protein (1)                                     |                                                                                                                                                                                                                                                                                                                                                             |                                                                                                                                                                                                                                                                                                                                                 | scaffold_5_mRNA_501.1           | -                           | -                               |
| GF0030657 | 1                            | 0                        | 0                            | Hypothetical protein (1)                                     |                                                                                                                                                                                                                                                                                                                                                             |                                                                                                                                                                                                                                                                                                                                                 | scaffold_5_mRNA_5000.1          | -                           | -                               |
| GF0030656 | 1                            | 0                        | 0                            | Hypothetical protein (1)                                     |                                                                                                                                                                                                                                                                                                                                                             |                                                                                                                                                                                                                                                                                                                                                 | scaffold_5_mRNA_4994.1          | -                           | -                               |
| GF0030655 | 1                            | 0                        | 0                            | Cell growth defect factor 2 (1)                              |                                                                                                                                                                                                                                                                                                                                                             |                                                                                                                                                                                                                                                                                                                                                 | scaffold_5_mRNA_4985.1          | -                           | -                               |
| GF0030654 | 1                            | 0                        | 0                            | Histone H3 (1)                                               | DNA binding [GO:0003677 molecular_function] (1); protein heterodimerization activity [GO:0046982 molecular_function] (1); nucleosome [GO:0000786 cellular_component] (1)                                                                                                                                                                                    | Histone-fold [IPR009072] (1); Histone H3/CENP-A [IPR000164] (1); Histone H2A/H2B/H3 [IPR0007125] (1)                                                                                                                                                                                                                                            | scaffold_5_mRNA_4984.1          | -                           | -                               |
| GF0030653 | 1                            | 0                        | 0                            | Hypothetical protein (1)                                     |                                                                                                                                                                                                                                                                                                                                                             |                                                                                                                                                                                                                                                                                                                                                 | scaffold_5_mRNA_4954.1          | -                           | -                               |
| GF0030652 | 1                            | 0                        | 0                            | Hypothetical protein (1)                                     |                                                                                                                                                                                                                                                                                                                                                             |                                                                                                                                                                                                                                                                                                                                                 | scaffold_5_mRNA_495.1           | -                           | -                               |
| GF0030651 | 1                            | 0                        | 0                            | Hypothetical protein (1)                                     |                                                                                                                                                                                                                                                                                                                                                             |                                                                                                                                                                                                                                                                                                                                                 | scaffold_5_mRNA_494.1           | -                           | -                               |

| ID        | Num. in <i>C. clementinae</i> | Num. in <i>C. ucinha</i> | Num. in <i>P. trifoliata</i> | Note                                                              | GO                                                                                                                                                                                                                                                                                                                 | InterPro                                                                                                                                                                                                                                                                      | Members in <i>C. clementinae</i> | Members in <i>C. ucinha</i> | Members in <i>P. trifoliata</i> |
|-----------|-------------------------------|--------------------------|------------------------------|-------------------------------------------------------------------|--------------------------------------------------------------------------------------------------------------------------------------------------------------------------------------------------------------------------------------------------------------------------------------------------------------------|-------------------------------------------------------------------------------------------------------------------------------------------------------------------------------------------------------------------------------------------------------------------------------|----------------------------------|-----------------------------|---------------------------------|
| GF0030650 | 1                             | 0                        | 0                            | 0 Hypothetical protein (1)                                        |                                                                                                                                                                                                                                                                                                                    | Retrotransposon gag domain [IPR005162] (1)                                                                                                                                                                                                                                    | scaffold_5_mRNA_4936.1           | -                           | -                               |
| GF0030649 | 1                             | 0                        | 0                            | 0 Hypothetical protein (1)                                        |                                                                                                                                                                                                                                                                                                                    |                                                                                                                                                                                                                                                                               | scaffold_5_mRNA_4933.1           | -                           | -                               |
| GF0030648 | 1                             | 0                        | 0                            | 0 Hypothetical protein (1)                                        | RNA binding [GO:0003723 molecular_function] (1)                                                                                                                                                                                                                                                                    | K Homology domain, type 1 [IPR004088] (1)                                                                                                                                                                                                                                     | scaffold_5_mRNA_493.1            | -                           | -                               |
| GF0030647 | 1                             | 0                        | 0                            | 0 Gamma carbonic anhydrase 3 (1)                                  |                                                                                                                                                                                                                                                                                                                    | Hexapeptide repeat [IPR001451] (1); Domain unknown function DU295 [IPR01574] (1); Trimeric LysA-like [IPR011004] (1)                                                                                                                                                          | scaffold_5_mRNA_4914.1           | -                           | -                               |
| GF0030646 | 1                             | 0                        | 0                            | 0 Phenylsulfonamide benzyl ether reductase                        |                                                                                                                                                                                                                                                                                                                    | NnrA-like domain [IPR008030] (1); NAD(P)-binding domain [IPR016040] (1)                                                                                                                                                                                                       | scaffold_5_mRNA_4910.1           | -                           | -                               |
| GF0030645 | 1                             | 0                        | 0                            | 0 Armadillo repeat containing protein-like                        | protein ubiquitination [GO:0016567 biological_process] (1); ubiquitin-protein transferase activity [GO:0004842 molecular_function] (1); binding [GO:0005488 molecular_function] (1)                                                                                                                                | Armadillo-type fold [IPR016024] (1); U box domain [IPR003613] (1); Armadillo-like helical [IPR011989] (1); Zinc finger RINGFYVE/PHD-type [IPR013083] (1)                                                                                                                      | scaffold_5_mRNA_4904.1           | -                           | -                               |
| GF0030644 | 1                             | 0                        | 0                            | 0 Hypothetical protein (1)                                        |                                                                                                                                                                                                                                                                                                                    |                                                                                                                                                                                                                                                                               | scaffold_5_mRNA_490.1            | -                           | -                               |
| GF0030643 | 1                             | 0                        | 0                            | 0 Hypothetical protein (1)                                        |                                                                                                                                                                                                                                                                                                                    |                                                                                                                                                                                                                                                                               | scaffold_5_mRNA_4894.1           | -                           | -                               |
| GF0030642 | 1                             | 0                        | 0                            | 0 Hypothetical protein (1)                                        |                                                                                                                                                                                                                                                                                                                    |                                                                                                                                                                                                                                                                               | scaffold_5_mRNA_489.1            | -                           | -                               |
| GF0030641 | 1                             | 0                        | 0                            | 0 Hypothetical protein (1)                                        |                                                                                                                                                                                                                                                                                                                    |                                                                                                                                                                                                                                                                               | scaffold_5_mRNA_488.1            | -                           | -                               |
| GF0030640 | 1                             | 0                        | 0                            | 0 Hypothetical protein (1)                                        |                                                                                                                                                                                                                                                                                                                    |                                                                                                                                                                                                                                                                               | scaffold_5_mRNA_4852.1           | -                           | -                               |
| GF0030639 | 1                             | 0                        | 0                            | 0 Hypothetical protein (1)                                        | integral component of membrane [GO:0016021 cellular_component] (1)                                                                                                                                                                                                                                                 | ELO family [IPR02076] (1)                                                                                                                                                                                                                                                     | scaffold_5_mRNA_4850.1           | -                           | -                               |
| GF0030638 | 1                             | 0                        | 0                            | 0 Hypothetical protein (1)                                        |                                                                                                                                                                                                                                                                                                                    |                                                                                                                                                                                                                                                                               | scaffold_5_mRNA_485.1            | -                           | -                               |
| GF0030637 | 1                             | 0                        | 0                            | 0 Hypothetical protein (1)                                        |                                                                                                                                                                                                                                                                                                                    |                                                                                                                                                                                                                                                                               | scaffold_5_mRNA_484.1            | -                           | -                               |
| GF0030636 | 1                             | 0                        | 0                            | 0 Hypothetical protein (1)                                        | protein binding [GO:0005515 molecular_function] (1)                                                                                                                                                                                                                                                                | WD40/YVTN repeat-like-containing domain [IPR015943] (1)                                                                                                                                                                                                                       | scaffold_5_mRNA_482.1            | -                           | -                               |
| GF0030635 | 1                             | 0                        | 0                            | 0 Sulfotransferase (1)                                            |                                                                                                                                                                                                                                                                                                                    | P-loop containing nucleoside triphosphate hydrolase [IPR027417] (1)                                                                                                                                                                                                           | scaffold_5_mRNA_480.1            | -                           | -                               |
| GF0030634 | 1                             | 0                        | 0                            | 0 Hypothetical protein (1)                                        |                                                                                                                                                                                                                                                                                                                    |                                                                                                                                                                                                                                                                               | scaffold_5_mRNA_480.1            | -                           | -                               |
| GF0030633 | 1                             | 0                        | 0                            | 0 Hypothetical protein (1)                                        | binding [GO:0005488 molecular_function] (1)                                                                                                                                                                                                                                                                        | Armadillo-type fold [IPR016024] (1)                                                                                                                                                                                                                                           | scaffold_5_mRNA_4797.1           | -                           | -                               |
| GF0030632 | 1                             | 0                        | 0                            | 0 Hypothetical protein (1)                                        |                                                                                                                                                                                                                                                                                                                    |                                                                                                                                                                                                                                                                               | scaffold_5_mRNA_4795.1           | -                           | -                               |
| GF0030631 | 1                             | 0                        | 0                            | 0 Hypothetical protein (1)                                        |                                                                                                                                                                                                                                                                                                                    |                                                                                                                                                                                                                                                                               | scaffold_5_mRNA_4790.1           | -                           | -                               |
| GF0030630 | 1                             | 0                        | 0                            | 0 Intracellular transport protein (1)                             | protein binding [GO:0005515 molecular_function] (1)                                                                                                                                                                                                                                                                | Tetratricopeptide-like helical domain [IPR011990] (1)                                                                                                                                                                                                                         | scaffold_5_mRNA_4787.1           | -                           | -                               |
| GF0030629 | 1                             | 0                        | 0                            | 0 Transmembrane 53 (1)                                            |                                                                                                                                                                                                                                                                                                                    | Protein of unknown function DUF29, TMEM53 [IPR008547] (1); Alpha/Beta hydrolase fold [IPR029058] (1)                                                                                                                                                                          | scaffold_5_mRNA_4785.1           | -                           | -                               |
| GF0030628 | 1                             | 0                        | 0                            | 0 Hypothetical protein (1)                                        |                                                                                                                                                                                                                                                                                                                    |                                                                                                                                                                                                                                                                               | scaffold_5_mRNA_4752.1           | -                           | -                               |
| GF0030627 | 1                             | 0                        | 0                            | 0 Subtilase family protein (1)                                    | serine-type endopeptidase activity [GO:0004352 molecular_function] (1); proteolysis [GO:0006508 biological_process] (1)                                                                                                                                                                                            | Peptidase S8 propeptide/proteinase inhibitor 9 [IPR010259] (1); Peptidase S8, subtilisin, Ser-active site [IPR023828] (1); Peptidase S8, subtilisin-related [IPR015500] (1); Cucumis-like catalytic domain [IPR034377] (1); Peptidase S8/S53 domain [IPR002029] (1)           | scaffold_5_mRNA_4748.1           | -                           | -                               |
| GF0030626 | 1                             | 0                        | 0                            | 0 Hypothetical protein (1)                                        |                                                                                                                                                                                                                                                                                                                    |                                                                                                                                                                                                                                                                               | scaffold_5_mRNA_4731.1           | -                           | -                               |
| GF0030625 | 1                             | 0                        | 0                            | 0 Hypothetical protein (1)                                        |                                                                                                                                                                                                                                                                                                                    |                                                                                                                                                                                                                                                                               | scaffold_5_mRNA_473.1            | -                           | -                               |
| GF0030624 | 1                             | 0                        | 0                            | 0 Putative disease resistance RGA3 (1)                            | ADP binding [GO:0043531 molecular_function] (1)                                                                                                                                                                                                                                                                    | Winged helix-turn-helix DNA-binding domain [IPR011991] (1); P-loop containing nucleoside triphosphate hydrolase [IPR027417] (1); NB-ARC [IPR002182] (1)                                                                                                                       | scaffold_5_mRNA_472.1            | -                           | -                               |
| GF0030623 | 1                             | 0                        | 0                            | 0 Hypothetical protein (1)                                        |                                                                                                                                                                                                                                                                                                                    | GPN-loop GTPase 2 [IPR030231] (1); GPN-loop GTPase [IPR004130] (1); P-loop containing nucleoside triphosphate hydrolase [IPR027417] (1)                                                                                                                                       | scaffold_5_mRNA_468.1            | -                           | -                               |
| GF0030622 | 1                             | 0                        | 0                            | 0 Hypothetical protein (1)                                        |                                                                                                                                                                                                                                                                                                                    |                                                                                                                                                                                                                                                                               | scaffold_5_mRNA_466.1            | -                           | -                               |
| GF0030621 | 1                             | 0                        | 0                            | 0 LRR and NB-ARC domain disease resistance protein (1)            | ADP binding [GO:0043531 molecular_function] (1)                                                                                                                                                                                                                                                                    | Winged helix-turn-helix DNA-binding domain [IPR011991] (1); Leucine-rich repeat domain, L domain-like [IPR032675] (1); NB-ARC [IPR002182] (1); P-loop containing nucleoside triphosphate hydrolase [IPR027417] (1)                                                            | scaffold_5_mRNA_466.1            | -                           | -                               |
| GF0030620 | 1                             | 0                        | 0                            | 0 Hypothetical protein (1)                                        |                                                                                                                                                                                                                                                                                                                    | Aspartic peptidase domain [IPR021109] (1)                                                                                                                                                                                                                                     | scaffold_5_mRNA_464.1            | -                           | -                               |
| GF0030619 | 1                             | 0                        | 0                            | 0 Neutral/alkaline invertase (1)                                  | glycopeptide alpha-N-acetylglucosaminidase activity [GO:0033926 molecular_function] (1); catalytic activity [GO:0003824 molecular_function] (1)                                                                                                                                                                    | Glycosyl hydrolase family 100 [IPR024746] (1); Six-hairpin glycosidase-like [IPR008928] (1)                                                                                                                                                                                   | scaffold_5_mRNA_4639.1           | -                           | -                               |
| GF0030618 | 1                             | 0                        | 0                            | 0 Hypothetical protein (1)                                        | ADP binding [GO:0043531 molecular_function] (1)                                                                                                                                                                                                                                                                    | NB-ARC [IPR002182] (1); P-loop containing nucleoside triphosphate hydrolase [IPR027417] (1); Leucine-rich repeat domain, L domain-like [IPR032675] (1); Winged helix-turn-helix DNA-binding domain [IPR011991] (1)                                                            | scaffold_5_mRNA_463.1            | -                           | -                               |
| GF0030617 | 1                             | 0                        | 0                            | 0 MA3 domain-containing protein (1)                               | binding [GO:0005488 molecular_function] (1)                                                                                                                                                                                                                                                                        | Armadillo-type fold [IPR016024] (1); Initiation factor eIF-4 gamma, MA3 [IPR003891] (1)                                                                                                                                                                                       | scaffold_5_mRNA_4617.1           | -                           | -                               |
| GF0030616 | 1                             | 0                        | 0                            | 0 Hypothetical protein (1)                                        | zinc ion binding [GO:0008270 molecular_function] (1); metallopeptidase activity [GO:0004181 molecular_function] (1); proteolysis [GO:0006508 biological_process] (1)                                                                                                                                               | Peptidase M14, carboxypeptidase A [IPR000834] (1)                                                                                                                                                                                                                             | scaffold_5_mRNA_4594.1           | -                           | -                               |
| GF0030615 | 1                             | 0                        | 0                            | 0 Receptor-like kinase plant (1)                                  | protein kinase activity [GO:0004672 molecular_function] (1); protein phosphorylation [GO:0006468 biological_process] (1); ATP binding [GO:0005524 molecular_function] (1)                                                                                                                                          | Protein kinase, ATP binding site [IPR017441] (1); Serine/threonine-protein kinase, active site [IPR008271] (1); Serine-threonine/tyrosine-protein kinase, catalytic domain [IPR001245] (1); Protein kinase domain [IPR000719] (1); Protein kinase-like domain [IPR011099] (1) | scaffold_5_mRNA_4584.1           | -                           | -                               |
| GF0030614 | 1                             | 0                        | 0                            | 0 Hypothetical protein (1)                                        |                                                                                                                                                                                                                                                                                                                    |                                                                                                                                                                                                                                                                               | scaffold_5_mRNA_458.1            | -                           | -                               |
| GF0030613 | 1                             | 0                        | 0                            | 0 Sesquiterpene synthase (1)                                      | metabolic process [GO:0008152 biological_process] (1); terpene synthase activity [GO:0010333 molecular_function] (1); lyase activity [GO:0016829 molecular_function] (1); magnesium ion binding [GO:0000287 molecular_function] (1)                                                                                | Isoprenoid synthase domain [IPR008949] (1); Terpene synthase, metal-binding domain [IPR005630] (1); Terpene synthase, N-terminal domain [IPR011986] (1); Terpenoid cyclases/protein prenyltransferase alpha-alpha toroid [IPR008930] (1)                                      | scaffold_5_mRNA_4569.1           | -                           | -                               |
| GF0030612 | 1                             | 0                        | 0                            | 0 Cytochrome P450 family 71 protein (1)                           | iron ion binding [GO:0005506 molecular_function] (1); heme binding [GO:0020037 molecular_function] (1); oxidoreductase activity, acting on paired donors, with incorporation or reduction of molecular oxygen [GO:0016705 molecular_function] (1); oxidation-reduction process [GO:0055114 biological_process] (1) | Cytochrome P450 [IPR001128] (1); Cytochrome P450, E-class, group I [IPR002401] (1)                                                                                                                                                                                            | scaffold_5_mRNA_4568.1           | -                           | -                               |
| GF0030611 | 1                             | 0                        | 0                            | 0 Protein SET DOMAIN GROUP 41 (1)                                 | protein binding [GO:0005515 molecular_function] (1)                                                                                                                                                                                                                                                                | SET domain [IPR001214] (1)                                                                                                                                                                                                                                                    | scaffold_5_mRNA_4562.1           | -                           | -                               |
| GF0030610 | 1                             | 0                        | 0                            | 0 Hypothetical protein (1)                                        |                                                                                                                                                                                                                                                                                                                    | Leucine-rich repeat domain, L domain-like [IPR032675] (1); Receptor L-domain [IPR000494] (1)                                                                                                                                                                                  | scaffold_5_mRNA_4553.1           | -                           | -                               |
| GF0030609 | 1                             | 0                        | 0                            | 0 Hypothetical protein (1)                                        |                                                                                                                                                                                                                                                                                                                    |                                                                                                                                                                                                                                                                               | scaffold_5_mRNA_4529.1           | -                           | -                               |
| GF0030608 | 1                             | 0                        | 0                            | 0 Hypothetical protein (1)                                        |                                                                                                                                                                                                                                                                                                                    |                                                                                                                                                                                                                                                                               | scaffold_5_mRNA_4514.1           | -                           | -                               |
| GF0030607 | 1                             | 0                        | 0                            | 0 Hypothetical protein (1)                                        |                                                                                                                                                                                                                                                                                                                    |                                                                                                                                                                                                                                                                               | scaffold_5_mRNA_451.1            | -                           | -                               |
| GF0030606 | 1                             | 0                        | 0                            | 0 Alcohol dehydrogenase (1)                                       | oxidation-reduction process [GO:0055114 biological_process] (1); oxidoreductase activity [GO:0016499 molecular_function] (1); zinc ion binding [GO:0008270 molecular_function] (1)                                                                                                                                 | Alcohol dehydrogenase, C-terminal [IPR013149] (1); Alcohol dehydrogenase, zinc-type, conserved site [IPR02329] (1); Alcohol dehydrogenase, N-terminal [IPR013154] (1); GroES-like [IPR011032] (1); NAD(P)-binding domain [IPR016040] (1)                                      | scaffold_5_mRNA_4502.1           | -                           | -                               |
| GF0030605 | 1                             | 0                        | 0                            | 0 Retrotransposon protein, putative, unclassified (1)             |                                                                                                                                                                                                                                                                                                                    | Reverse transcriptase domain [IPR000477] (1)                                                                                                                                                                                                                                  | scaffold_5_mRNA_4491.1           | -                           | -                               |
| GF0030604 | 1                             | 0                        | 0                            | 0 GPN-loop GTPase 2 (1)                                           |                                                                                                                                                                                                                                                                                                                    | Leucine-rich repeat domain, L domain-like [IPR032675] (1); P-loop containing nucleoside triphosphate hydrolase [IPR027417] (1); GPN-loop GTPase [IPR004130] (1); GPN-loop GTPase 2 [IPR030231] (1)                                                                            | scaffold_5_mRNA_449.1            | -                           | -                               |
| GF0030603 | 1                             | 0                        | 0                            | 0 Hypothetical protein (1)                                        |                                                                                                                                                                                                                                                                                                                    | LIM-domain binding protein/SEUSS [IPR029005] (1)                                                                                                                                                                                                                              | scaffold_5_mRNA_4486.1           | -                           | -                               |
| GF0030602 | 1                             | 0                        | 0                            | 0 Cytosolic riboside 5'-nucleosiphosphate phosphorylhydrolase (1) |                                                                                                                                                                                                                                                                                                                    | LOG family [IPR031100] (1)                                                                                                                                                                                                                                                    | scaffold_5_mRNA_4479.1           | -                           | -                               |
| GF0030601 | 1                             | 0                        | 0                            | 0 Hypothetical protein (1)                                        |                                                                                                                                                                                                                                                                                                                    |                                                                                                                                                                                                                                                                               | scaffold_5_mRNA_4444.1           | -                           | -                               |
| GF0030600 | 1                             | 0                        | 0                            | 0 Hypothetical protein (1)                                        |                                                                                                                                                                                                                                                                                                                    |                                                                                                                                                                                                                                                                               | scaffold_5_mRNA_4443.1           | -                           | -                               |

| ID        | Num. in <i>C. caryophyllata</i> | Num. in <i>C. uchiha</i> | Num. in <i>P. trifoliata</i> | Note                                                        | GO                                                                                                                                                                                                                                                                                                                                                                                                     | InterPro                                                                                                                                                                                                                                      | Members in <i>C. caryophyllata</i> | Members in <i>C. uchiha</i> | Members in <i>P. trifoliata</i> |
|-----------|---------------------------------|--------------------------|------------------------------|-------------------------------------------------------------|--------------------------------------------------------------------------------------------------------------------------------------------------------------------------------------------------------------------------------------------------------------------------------------------------------------------------------------------------------------------------------------------------------|-----------------------------------------------------------------------------------------------------------------------------------------------------------------------------------------------------------------------------------------------|------------------------------------|-----------------------------|---------------------------------|
| GF0030599 | 1                               | 0                        | 0                            | 0 Putative acyl-activating enzyme 6 (1)                     | catalytic activity [GO:0003824 molecular_function] (1); metabolic process [GO:0008152 biological_process] (1)                                                                                                                                                                                                                                                                                          | AMP-binding, conserved site [IPRO20845] (1); AMP-binding enzyme C-terminal domain [IPRO21101] (1); AMP-dependent synthetase/ligase [IPRO00873] (1)                                                                                            | scaffold_5_mRNA_4442.1             | -                           | -                               |
| GF0030598 | 1                               | 0                        | 0                            | 0 Hypothetical protein (1)                                  |                                                                                                                                                                                                                                                                                                                                                                                                        |                                                                                                                                                                                                                                               | scaffold_5_mRNA_4427.1             | -                           | -                               |
| GF0030597 | 1                               | 0                        | 0                            | 0 Hypothetical protein (1)                                  |                                                                                                                                                                                                                                                                                                                                                                                                        |                                                                                                                                                                                                                                               | scaffold_5_mRNA_4410.1             | -                           | -                               |
| GF0030596 | 1                               | 0                        | 0                            | 0 12-oxophylodienoate reductase 1 (1)                       | catalytic activity [GO:0003824 molecular_function] (1); FMN binding [GO:0010181 molecular_function] (1); oxidoreductase activity [GO:0016491 molecular_function] (1); oxidation-reduction process [GO:0055114 biological_process] (1)                                                                                                                                                                  | Aldolase-type TIM barrel [IPRO13785] (1); NADH:flavin oxidoreductase/NADH oxidase, N-terminal [IPRO01155] (1)                                                                                                                                 | scaffold_5_mRNA_441.1              | -                           | -                               |
| GF0030595 | 1                               | 0                        | 0                            | 0 Carboxy-terminal domain cyclin (1)                        |                                                                                                                                                                                                                                                                                                                                                                                                        |                                                                                                                                                                                                                                               | scaffold_5_mRNA_4408.1             | -                           | -                               |
| GF0030594 | 1                               | 0                        | 0                            | 0 Hypothetical protein (1)                                  |                                                                                                                                                                                                                                                                                                                                                                                                        |                                                                                                                                                                                                                                               | scaffold_5_mRNA_439.1              | -                           | -                               |
| GF0030593 | 1                               | 0                        | 0                            | 0 Hypothetical protein (1)                                  |                                                                                                                                                                                                                                                                                                                                                                                                        |                                                                                                                                                                                                                                               | scaffold_5_mRNA_4384.1             | -                           | -                               |
| GF0030592 | 1                               | 0                        | 0                            | 0 Hypothetical protein (1)                                  |                                                                                                                                                                                                                                                                                                                                                                                                        |                                                                                                                                                                                                                                               | scaffold_5_mRNA_437.1              | -                           | -                               |
| GF0030591 | 1                               | 0                        | 0                            | 0 Hypothetical protein (1)                                  |                                                                                                                                                                                                                                                                                                                                                                                                        | Retransposon gag domain [IPRO05162] (1)                                                                                                                                                                                                       | scaffold_5_mRNA_436.1              | -                           | -                               |
| GF0030590 | 1                               | 0                        | 0                            | 0 Hypothetical protein (1)                                  |                                                                                                                                                                                                                                                                                                                                                                                                        |                                                                                                                                                                                                                                               | scaffold_5_mRNA_4362.1             | -                           | -                               |
| GF0030589 | 1                               | 0                        | 0                            | 0 Hypothetical protein (1)                                  |                                                                                                                                                                                                                                                                                                                                                                                                        |                                                                                                                                                                                                                                               | scaffold_5_mRNA_4344.1             | -                           | -                               |
| GF0030588 | 1                               | 0                        | 0                            | 0 Hypothetical protein (1)                                  |                                                                                                                                                                                                                                                                                                                                                                                                        |                                                                                                                                                                                                                                               | scaffold_5_mRNA_433.1              | -                           | -                               |
| GF0030587 | 1                               | 0                        | 0                            | 0 Hypothetical protein (1)                                  |                                                                                                                                                                                                                                                                                                                                                                                                        |                                                                                                                                                                                                                                               | scaffold_5_mRNA_4316.1             | -                           | -                               |
| GF0030586 | 1                               | 0                        | 0                            | 0 Hypothetical protein (1)                                  |                                                                                                                                                                                                                                                                                                                                                                                                        |                                                                                                                                                                                                                                               | scaffold_5_mRNA_4310.1             | -                           | -                               |
| GF0030585 | 1                               | 0                        | 0                            | 0 Hypothetical protein (1)                                  |                                                                                                                                                                                                                                                                                                                                                                                                        |                                                                                                                                                                                                                                               | scaffold_5_mRNA_431.1              | -                           | -                               |
| GF0030584 | 1                               | 0                        | 0                            | 0 Hypothetical protein (1)                                  | nucleic acid binding [GO:0003676 molecular_function] (1); RNA-DNA hybrid ribonuclease activity [GO:0004523 molecular_function] (1) adenylyl-nucleotide exchange factor activity [GO:0000774 molecular_function] (1); protein homodimerization activity [GO:0042801 molecular_function] (1); protein folding [GO:0006457 biological_process] (1); chaperone binding [GO:0051087 molecular_function] (1) | Ribonuclease H-like domain [IPRO12337] (1); Ribonuclease H domain [IPRO02156] (1)                                                                                                                                                             | scaffold_5_mRNA_430.1              | -                           | -                               |
| GF0030583 | 1                               | 0                        | 0                            | 0 GrpE protein homolog (1)                                  |                                                                                                                                                                                                                                                                                                                                                                                                        | GrpE nucleotide exchange factor, coiled-coil [IPRO13805] (1); GrpE nucleotide exchange factor [IPRO0740] (1); GrpE nucleotide exchange factor, head [IPRO09012] (1)                                                                           | scaffold_5_mRNA_4294.1             | -                           | -                               |
| GF0030582 | 1                               | 0                        | 0                            | 0 Hypothetical protein (1)                                  |                                                                                                                                                                                                                                                                                                                                                                                                        | Protein of unknown function DU4750 [IPRO18151] (1)                                                                                                                                                                                            | scaffold_5_mRNA_4293.1             | -                           | -                               |
| GF0030581 | 1                               | 0                        | 0                            | 0 Hypothetical protein (1)                                  |                                                                                                                                                                                                                                                                                                                                                                                                        |                                                                                                                                                                                                                                               | scaffold_5_mRNA_4292.1             | -                           | -                               |
| GF0030580 | 1                               | 0                        | 0                            | 0 Hypothetical protein (1)                                  |                                                                                                                                                                                                                                                                                                                                                                                                        | Ankyrin repeat-containing domain [IPRO20683] (1)                                                                                                                                                                                              | scaffold_5_mRNA_426.1              | -                           | -                               |
| GF0030579 | 1                               | 0                        | 0                            | 0 Hypothetical protein (1)                                  |                                                                                                                                                                                                                                                                                                                                                                                                        |                                                                                                                                                                                                                                               | scaffold_5_mRNA_4252.1             | -                           | -                               |
| GF0030578 | 1                               | 0                        | 0                            | 0 Random slug protein 5 (1)                                 |                                                                                                                                                                                                                                                                                                                                                                                                        | CRAL-TRIO lipid binding domain [IPRO10251] (1); CRAL-TRIO, N-terminal domain [IPRO11074] (1)                                                                                                                                                  | scaffold_5_mRNA_4251.1             | -                           | -                               |
| GF0030577 | 1                               | 0                        | 0                            | 0 Hypothetical protein (1)                                  |                                                                                                                                                                                                                                                                                                                                                                                                        |                                                                                                                                                                                                                                               | scaffold_5_mRNA_4249.1             | -                           | -                               |
| GF0030576 | 1                               | 0                        | 0                            | 0 Hypothetical protein (1)                                  |                                                                                                                                                                                                                                                                                                                                                                                                        |                                                                                                                                                                                                                                               | scaffold_5_mRNA_4247.1             | -                           | -                               |
| GF0030575 | 1                               | 0                        | 0                            | 0 Hypothetical protein (1)                                  |                                                                                                                                                                                                                                                                                                                                                                                                        |                                                                                                                                                                                                                                               | scaffold_5_mRNA_424.1              | -                           | -                               |
| GF0030574 | 1                               | 0                        | 0                            | 0 Hypothetical protein (1)                                  | transferase activity, transferring hexosyl groups [GO:0016758 molecular_function] (1); metabolic process [GO:0008152 biological_process] (1)                                                                                                                                                                                                                                                           | UDP-glucuronosylUDP-glucosyltransferase [IPRO02213] (1)                                                                                                                                                                                       | scaffold_5_mRNA_4226.1             | -                           | -                               |
| GF0030573 | 1                               | 0                        | 0                            | 0 Hypothetical protein (1)                                  |                                                                                                                                                                                                                                                                                                                                                                                                        | Ankyrin repeat-containing domain [IPRO20683] (1)                                                                                                                                                                                              | scaffold_5_mRNA_422.1              | -                           | -                               |
| GF0030572 | 1                               | 0                        | 0                            | 0 Ankyrin repeat plant-like protein (1)                     | protein binding [GO:0005515 molecular_function] (1)                                                                                                                                                                                                                                                                                                                                                    | Ankyrin repeat-containing domain [IPRO20683] (1); PGD domain [IPRO20961] (1); Ankyrin repeat [IPRO1421] (1)                                                                                                                                   | scaffold_5_mRNA_420.1              | -                           | -                               |
| GF0030571 | 1                               | 0                        | 0                            | 0 Alcohol dehydrogenase (1)                                 | zinc ion binding [GO:0008270 molecular_function] (1); oxidation-reduction process [GO:0055114 biological_process] (1); oxidoreductase activity [GO:0016491 molecular_function] (1)                                                                                                                                                                                                                     | NAD(P)-binding domain [IPRO16040] (1); GroES-like [IPRO11032] (1); Alcohol dehydrogenase, N-terminal [IPRO13154] (1); Alcohol dehydrogenase, zinc-type, conserved site [IPRO02328] (1); Alcohol dehydrogenase, C-terminal [IPRO13149] (1)     | scaffold_5_mRNA_4192.1             | -                           | -                               |
| GF0030570 | 1                               | 0                        | 0                            | 0 Hypothetical protein (1)                                  |                                                                                                                                                                                                                                                                                                                                                                                                        |                                                                                                                                                                                                                                               | scaffold_5_mRNA_4191.1             | -                           | -                               |
| GF0030569 | 1                               | 0                        | 0                            | 0 Cytokinin riboside 5'-monophosphate phosphoribidylase (1) |                                                                                                                                                                                                                                                                                                                                                                                                        | LOG family [IPRO31100] (1)                                                                                                                                                                                                                    | scaffold_5_mRNA_4190.1             | -                           | -                               |
| GF0030568 | 1                               | 0                        | 0                            | 0 12-oxophylodienoate reductase 2 (1)                       | catalytic activity [GO:0003824 molecular_function] (1); oxidoreductase activity [GO:0016491 molecular_function] (1); oxidation-reduction process [GO:0055114 biological_process] (1); FMN binding [GO:0010181 molecular_function] (1)                                                                                                                                                                  | Aldolase-type TIM barrel [IPRO13785] (1); NADH:flavin oxidoreductase/NADH oxidase, N-terminal [IPRO01155] (1)                                                                                                                                 | scaffold_5_mRNA_419.1              | -                           | -                               |
| GF0030567 | 1                               | 0                        | 0                            | 0 Hypothetical protein (1)                                  |                                                                                                                                                                                                                                                                                                                                                                                                        |                                                                                                                                                                                                                                               | scaffold_5_mRNA_4189.1             | -                           | -                               |
| GF0030566 | 1                               | 0                        | 0                            | 0 Cytokinin riboside 5'-monophosphate phosphoribidylase (1) |                                                                                                                                                                                                                                                                                                                                                                                                        | Cytokinin riboside 5'-monophosphate phosphoribidylase LOG [IPRO05269] (1); LOG family [IPRO31100] (1)                                                                                                                                         | scaffold_5_mRNA_4185.1             | -                           | -                               |
| GF0030565 | 1                               | 0                        | 0                            | 0 Alcohol dehydrogenase (1)                                 | zinc ion binding [GO:0008270 molecular_function] (1); oxidation-reduction process [GO:0055114 biological_process] (1); oxidoreductase activity [GO:0016491 molecular_function] (1)                                                                                                                                                                                                                     | Alcohol dehydrogenase, C-terminal [IPRO13149] (1); Alcohol dehydrogenase, zinc-type, conserved site [IPRO02328] (1); Alcohol dehydrogenase, N-terminal [IPRO13154] (1); GroES-like [IPRO11032] (1); NAD(P)-binding domain [IPRO16040] (1)     | scaffold_5_mRNA_4184.1             | -                           | -                               |
| GF0030564 | 1                               | 0                        | 0                            | 0 Ankyrin repeat protein (1)                                |                                                                                                                                                                                                                                                                                                                                                                                                        | PGD domain [IPRO20961] (1)                                                                                                                                                                                                                    | scaffold_5_mRNA_415.1              | -                           | -                               |
| GF0030563 | 1                               | 0                        | 0                            | 0 Hypothetical protein (1)                                  |                                                                                                                                                                                                                                                                                                                                                                                                        |                                                                                                                                                                                                                                               | scaffold_5_mRNA_414.1              | -                           | -                               |
| GF0030562 | 1                               | 0                        | 0                            | 0 12-oxophylodienoate reductase 2 (1)                       | catalytic activity [GO:0003824 molecular_function] (1); FMN binding [GO:0010181 molecular_function] (1); oxidoreductase activity [GO:0016491 molecular_function] (1); oxidation-reduction process [GO:0055114 biological_process] (1)                                                                                                                                                                  | NADH:flavin oxidoreductase/NADH oxidase, N-terminal [IPRO01155] (1); Aldolase-type TIM barrel [IPRO13785] (1)                                                                                                                                 | scaffold_5_mRNA_413.1              | -                           | -                               |
| GF0030561 | 1                               | 0                        | 0                            | 0 Hypothetical protein (1)                                  |                                                                                                                                                                                                                                                                                                                                                                                                        | Rossmann-like alpha/beta/alpha sandwich fold [IPRO14729] (1)                                                                                                                                                                                  | scaffold_5_mRNA_4127.1             | -                           | -                               |
| GF0030560 | 1                               | 0                        | 0                            | 0 Carbonate dehydratase (1)                                 | zinc ion binding [GO:0008270 molecular_function] (1); carbonate dehydratase activity [GO:0004089 molecular_function] (1)                                                                                                                                                                                                                                                                               | Carbonic anhydrase [IPRO01765] (1)                                                                                                                                                                                                            | scaffold_5_mRNA_4123.1             | -                           | -                               |
| GF0030559 | 1                               | 0                        | 0                            | 0 Hypothetical protein (1)                                  | binding [GO:0005488 molecular_function] (1)                                                                                                                                                                                                                                                                                                                                                            | Domain of unknown function DU4704 [IPRO31570] (1); Armadillo-type fold [IPRO16024] (1); Concavalin A-like lectin glucanase domain [IPRO13320] (1); Armadillo-like helical [IPRO11989] (1)                                                     | scaffold_5_mRNA_4102.1             | -                           | -                               |
| GF0030558 | 1                               | 0                        | 0                            | 0 Hydroxyproline-rich glycoprotein family protein (1)       |                                                                                                                                                                                                                                                                                                                                                                                                        | Spo12 [IPRO07727] (1)                                                                                                                                                                                                                         | scaffold_5_mRNA_4089.1             | -                           | -                               |
| GF0030557 | 1                               | 0                        | 0                            | 0 Hypothetical protein (1)                                  |                                                                                                                                                                                                                                                                                                                                                                                                        |                                                                                                                                                                                                                                               | scaffold_5_mRNA_4087.1             | -                           | -                               |
| GF0030556 | 1                               | 0                        | 0                            | 0 MAADS-box transcription factor (1)                        |                                                                                                                                                                                                                                                                                                                                                                                                        |                                                                                                                                                                                                                                               | scaffold_5_mRNA_4083.1             | -                           | -                               |
| GF0030555 | 1                               | 0                        | 0                            | 0 Tubulin alpha chain (1)                                   | microtubule [GO:0005874 cellular_component] (1); structural constituent of cytoskeleton [GO:0005201 molecular_function] (1); GTP binding [GO:0005525 molecular_function] (1); microtubule-based process [GO:0007011 biological_process] (1); GTPase activity [GO:0003924 molecular_function] (1)                                                                                                       | Alpha tubulin [IPRO02452] (1); Tubulin/FtsZ, C-terminal [IPRO08280] (1); Tubulin [IPRO00217] (1); Tubulin/FtsZ, 2-layer sandwich domain [IPRO18316] (1); Tubulin, conserved site [IPRO17975] (1); Tubulin/FtsZ, GTPase domain [IPRO03008] (1) | scaffold_5_mRNA_4053.1             | -                           | -                               |
| GF0030554 | 1                               | 0                        | 0                            | 0 Hypothetical protein (1)                                  |                                                                                                                                                                                                                                                                                                                                                                                                        |                                                                                                                                                                                                                                               | scaffold_5_mRNA_4042.1             | -                           | -                               |
| GF0030553 | 1                               | 0                        | 0                            | 0 Hypothetical protein (1)                                  |                                                                                                                                                                                                                                                                                                                                                                                                        |                                                                                                                                                                                                                                               | scaffold_5_mRNA_4040.1             | -                           | -                               |
| GF0030552 | 1                               | 0                        | 0                            | 0 Hypothetical protein (1)                                  |                                                                                                                                                                                                                                                                                                                                                                                                        |                                                                                                                                                                                                                                               | scaffold_5_mRNA_4039.1             | -                           | -                               |
| GF0030551 | 1                               | 0                        | 0                            | 0 Hypothetical protein (1)                                  |                                                                                                                                                                                                                                                                                                                                                                                                        |                                                                                                                                                                                                                                               | scaffold_5_mRNA_4038.1             | -                           | -                               |
| GF0030550 | 1                               | 0                        | 0                            | 0 Hypothetical protein (1)                                  |                                                                                                                                                                                                                                                                                                                                                                                                        |                                                                                                                                                                                                                                               | scaffold_5_mRNA_4037.1             | -                           | -                               |
| GF0030549 | 1                               | 0                        | 0                            | 0 Hypothetical protein (1)                                  |                                                                                                                                                                                                                                                                                                                                                                                                        |                                                                                                                                                                                                                                               | scaffold_5_mRNA_4036.1             | -                           | -                               |
| GF0030548 | 1                               | 0                        | 0                            | 0 Hypothetical protein (1)                                  |                                                                                                                                                                                                                                                                                                                                                                                                        |                                                                                                                                                                                                                                               | scaffold_5_mRNA_4024.1             | -                           | -                               |
| GF0030547 | 1                               | 0                        | 0                            | 0 Hypothetical protein (1)                                  |                                                                                                                                                                                                                                                                                                                                                                                                        |                                                                                                                                                                                                                                               | scaffold_5_mRNA_4020.1             | -                           | -                               |
| GF0030546 | 1                               | 0                        | 0                            | 0 RNA-directed DNA polymerase (Reverse transcriptase) (1)   |                                                                                                                                                                                                                                                                                                                                                                                                        | Reverse transcriptase domain [IPRO00477] (1)                                                                                                                                                                                                  | scaffold_5_mRNA_4.1                | -                           | -                               |
| GF0030545 | 1                               | 0                        | 0                            | 0 Hypothetical protein (1)                                  |                                                                                                                                                                                                                                                                                                                                                                                                        |                                                                                                                                                                                                                                               | scaffold_5_mRNA_3992.1             | -                           | -                               |
| GF0030544 | 1                               | 0                        | 0                            | 0 Hypothetical protein (1)                                  |                                                                                                                                                                                                                                                                                                                                                                                                        |                                                                                                                                                                                                                                               | scaffold_5_mRNA_3989.1             | -                           | -                               |
| GF0030543 | 1                               | 0                        | 0                            | 0 Hypothetical protein (1)                                  |                                                                                                                                                                                                                                                                                                                                                                                                        | Uncharacterised protein family SERF [IPRO07513] (1); A2g23090-like [IPRO26939] (1)                                                                                                                                                            | scaffold_5_mRNA_3973.1             | -                           | -                               |
| GF0030542 | 1                               | 0                        | 0                            | 0 Hypothetical protein (1)                                  |                                                                                                                                                                                                                                                                                                                                                                                                        |                                                                                                                                                                                                                                               | scaffold_5_mRNA_3953.1             | -                           | -                               |
| GF0030541 | 1                               | 0                        | 0                            | 0 Monosaccharide transport protein (1)                      |                                                                                                                                                                                                                                                                                                                                                                                                        |                                                                                                                                                                                                                                               | scaffold_5_mRNA_3952.1             | -                           | -                               |
| GF0030540 | 1                               | 0                        | 0                            | 0 Hypothetical protein (1)                                  |                                                                                                                                                                                                                                                                                                                                                                                                        | Retransposon gag domain [IPRO05162] (1)                                                                                                                                                                                                       | scaffold_5_mRNA_3950.1             | -                           | -                               |

| ID        | Num. in <i>C. clementiae</i> | Num. in <i>C. uchiha</i> | Num. in <i>P. trifoliata</i> | Note                                                        | GO                                                                                                                                                                                                                       | InterPro                                                                                                                                                                                                                                                                                              | Members in <i>C. clementiae</i> | Members in <i>C. uchiha</i> | Members in <i>P. trifoliata</i> |
|-----------|------------------------------|--------------------------|------------------------------|-------------------------------------------------------------|--------------------------------------------------------------------------------------------------------------------------------------------------------------------------------------------------------------------------|-------------------------------------------------------------------------------------------------------------------------------------------------------------------------------------------------------------------------------------------------------------------------------------------------------|---------------------------------|-----------------------------|---------------------------------|
| GF0030539 | 1                            | 0                        | 0                            | 0 Ankyrin repeat family protein, putative (1)               | protein binding [GO:0005515 molecular_function] (1)                                                                                                                                                                      | Ankyrin repeat [IPRO02110] (1); Ankyrin repeat-containing domain [IPRO20683] (1); PGG domain [IPRO2696] (1)                                                                                                                                                                                           | scaffold_5_mRNA_395.1           | -                           | -                               |
| GF0030538 | 1                            | 0                        | 0                            | 0 Hypothetical protein (1)                                  |                                                                                                                                                                                                                          |                                                                                                                                                                                                                                                                                                       | scaffold_5_mRNA_392.1           | -                           | -                               |
| GF0030537 | 1                            | 0                        | 0                            | 0 Hypothetical protein (1)                                  |                                                                                                                                                                                                                          |                                                                                                                                                                                                                                                                                                       | scaffold_5_mRNA_39.1            | -                           | -                               |
| GF0030536 | 1                            | 0                        | 0                            | 0 Hypothetical protein (1)                                  |                                                                                                                                                                                                                          |                                                                                                                                                                                                                                                                                                       | scaffold_5_mRNA_3886.1          | -                           | -                               |
| GF0030535 | 1                            | 0                        | 0                            | 0 Hypothetical protein (1)                                  |                                                                                                                                                                                                                          | Protein of unknown function DUF3511 [IPRO21899] (1)                                                                                                                                                                                                                                                   | scaffold_5_mRNA_3878.1          | -                           | -                               |
| GF0030534 | 1                            | 0                        | 0                            | 0 Pilosum protein 2-B5 (1)                                  | protein binding [GO:0005515 molecular_function] (1)                                                                                                                                                                      | Pilosum protein 2-like [IPRO25886] (1); F-box domain [IPRO01810] (1)                                                                                                                                                                                                                                  | scaffold_5_mRNA_3854.1          | -                           | -                               |
| GF0030533 | 1                            | 0                        | 0                            | 0 Hypothetical protein (1)                                  |                                                                                                                                                                                                                          |                                                                                                                                                                                                                                                                                                       | scaffold_5_mRNA_3853.1          | -                           | -                               |
| GF0030532 | 1                            | 0                        | 0                            | 0 Hypothetical protein (1)                                  |                                                                                                                                                                                                                          |                                                                                                                                                                                                                                                                                                       | scaffold_5_mRNA_3851.1          | -                           | -                               |
| GF0030531 | 1                            | 0                        | 0                            | 0 Hypothetical protein (1)                                  |                                                                                                                                                                                                                          | Iron hydrogenase [IPRO00916] (1); Iron hydrogenase, small subunit [IPRO03149] (1); Iron hydrogenase, large subunit, C-terminal [IPRO04108] (1)                                                                                                                                                        | scaffold_5_mRNA_3847.1          | -                           | -                               |
| GF0030530 | 1                            | 0                        | 0                            | 0 Hypothetical protein (1)                                  |                                                                                                                                                                                                                          |                                                                                                                                                                                                                                                                                                       | scaffold_5_mRNA_3837.1          | -                           | -                               |
| GF0030529 | 1                            | 0                        | 0                            | 0 Hypothetical protein (1)                                  |                                                                                                                                                                                                                          |                                                                                                                                                                                                                                                                                                       | scaffold_5_mRNA_3833.1          | -                           | -                               |
| GF0030528 | 1                            | 0                        | 0                            | 0 Hypothetical protein (1)                                  |                                                                                                                                                                                                                          |                                                                                                                                                                                                                                                                                                       | scaffold_5_mRNA_3832.1          | -                           | -                               |
| GF0030527 | 1                            | 0                        | 0                            | 0 Hypothetical protein (1)                                  |                                                                                                                                                                                                                          |                                                                                                                                                                                                                                                                                                       | scaffold_5_mRNA_3831.1          | -                           | -                               |
| GF0030526 | 1                            | 0                        | 0                            | 0 Retrotransposon protein, putative, Ty1-copia subclass (1) |                                                                                                                                                                                                                          |                                                                                                                                                                                                                                                                                                       | scaffold_5_mRNA_383.1           | -                           | -                               |
| GF0030525 | 1                            | 0                        | 0                            | 0 Hypothetical protein (1)                                  |                                                                                                                                                                                                                          |                                                                                                                                                                                                                                                                                                       | scaffold_5_mRNA_3829.1          | -                           | -                               |
| GF0030524 | 1                            | 0                        | 0                            | 0 Hypothetical protein (1)                                  | protein binding [GO:0005515 molecular_function] (1)                                                                                                                                                                      | Leucine-rich repeat domain, L domain-like [IPRO32675] (1); F-box domain [IPRO01810] (1)                                                                                                                                                                                                               | scaffold_5_mRNA_3828.1          | -                           | -                               |
| GF0030523 | 1                            | 0                        | 0                            | 0 Hypothetical protein (1)                                  |                                                                                                                                                                                                                          | Leucine-rich repeat domain, L domain-like [IPRO32675] (1); FBD domain [IPRO06566] (1)                                                                                                                                                                                                                 | scaffold_5_mRNA_3827.1          | -                           | -                               |
| GF0030522 | 1                            | 0                        | 0                            | 0 Monosaccharide transport protein (1)                      |                                                                                                                                                                                                                          |                                                                                                                                                                                                                                                                                                       | scaffold_5_mRNA_3826.1          | -                           | -                               |
| GF0030521 | 1                            | 0                        | 0                            | 0 Hypothetical protein (1)                                  |                                                                                                                                                                                                                          |                                                                                                                                                                                                                                                                                                       | scaffold_5_mRNA_382.1           | -                           | -                               |
| GF0030520 | 1                            | 0                        | 0                            | 0 CXE carboxylesterase (1)                                  | measurase process [GO:0006124 biological_process] (1); hydrolase activity [GO:0016787]                                                                                                                                   | Alpha/Beta hydrolase fold [IPRO29058] (1); Alpha/Beta hydrolase fold-3 [IPRO13094] (1)                                                                                                                                                                                                                | scaffold_5_mRNA_3816.1          | -                           | -                               |
| GF0030519 | 1                            | 0                        | 0                            | 0 Sugar transporter SWEET (1)                               | integral component of membrane [GO:0016021 cellular_component] (1)                                                                                                                                                       | SWEET sugar transporter [IPRO04316] (1)                                                                                                                                                                                                                                                               | scaffold_5_mRNA_3815.1          | -                           | -                               |
| GF0030518 | 1                            | 0                        | 0                            | 0 BiP isoform A family protein (1)                          |                                                                                                                                                                                                                          | Heat shock protein 70 family [IPRO13126] (1); Heat shock protein 70, conserved site [IPRO18181] (1); Heat shock protein 70/D, peptide-binding domain [IPRO29047] (1)                                                                                                                                  | scaffold_5_mRNA_3814.1          | -                           | -                               |
| GF0030517 | 1                            | 0                        | 0                            | 0 Retrotransposon protein, putative, Ty1-copia subclass (1) |                                                                                                                                                                                                                          | GAG-pre-integrase domain [IPRO25724] (1)                                                                                                                                                                                                                                                              | scaffold_5_mRNA_381.1           | -                           | -                               |
| GF0030516 | 1                            | 0                        | 0                            | 0 BiP isoform A family protein (1)                          |                                                                                                                                                                                                                          | Heat shock protein 70/D, peptide-binding domain [IPRO29047] (1); Heat shock protein 70, conserved site [IPRO18181] (1); Heat shock protein 70 family [IPRO13126] (1)                                                                                                                                  | scaffold_5_mRNA_3808.1          | -                           | -                               |
| GF0030515 | 1                            | 0                        | 0                            | 0 22.0 kDa class IV heat shock protein (1)                  |                                                                                                                                                                                                                          | Alpha crystallin/Hsp20 domain [IPRO02088] (1); HSP20-like chaperone [IPRO08978] (1); Small heat shock protein-Hsp20 [IPRO31107] (1)                                                                                                                                                                   | scaffold_5_mRNA_38.1            | -                           | -                               |
| GF0030514 | 1                            | 0                        | 0                            | 0 Hypothetical protein (1)                                  |                                                                                                                                                                                                                          | Domain of unknown function DUF4283 [IPRO25558] (1)                                                                                                                                                                                                                                                    | scaffold_5_mRNA_3797.1          | -                           | -                               |
| GF0030513 | 1                            | 0                        | 0                            | 0 Hypothetical protein (1)                                  |                                                                                                                                                                                                                          |                                                                                                                                                                                                                                                                                                       | scaffold_5_mRNA_3796.1          | -                           | -                               |
| GF0030512 | 1                            | 0                        | 0                            | 0 Cytokinin riboside 5'-monophosphate phosphoribidylase (1) |                                                                                                                                                                                                                          | LOG family [IPRO31100] (1)                                                                                                                                                                                                                                                                            | scaffold_5_mRNA_3795.1          | -                           | -                               |
| GF0030511 | 1                            | 0                        | 0                            | 0 Hypothetical protein (1)                                  | protein phosphorylation [GO:0006468 biological_process] (1); protein kinase activity [GO:0004672 molecular_function] (1); ATP binding [GO:0005524 molecular_function] (1)                                                | Protein kinase-like domain [IPRO11009] (1); Protein kinase domain [IPRO00719] (1); Serine-threonine/tyrosine-protein kinase, catalytic domain [IPRO01245] (1)                                                                                                                                         | scaffold_5_mRNA_3764.1          | -                           | -                               |
| GF0030510 | 1                            | 0                        | 0                            | 0 Hypothetical protein (1)                                  | protein phosphorylation [GO:0006468 biological_process] (1); protein kinase activity [GO:0004672 molecular_function] (1); ATP binding [GO:0005524 molecular_function] (1)                                                | Protein kinase-like domain [IPRO11009] (1); Protein kinase domain [IPRO00719] (1)                                                                                                                                                                                                                     | scaffold_5_mRNA_3763.1          | -                           | -                               |
| GF0030509 | 1                            | 0                        | 0                            | 0 Putative wall-associated receptor kinase-like 16 (1)      | protein kinase activity [GO:0004672 molecular_function] (1); protein phosphorylation [GO:0006468 biological_process] (1); ATP binding [GO:0005524 molecular_function] (1)                                                | Protein kinase-like domain [IPRO11009] (1); Protein kinase domain [IPRO00719] (1)                                                                                                                                                                                                                     | scaffold_5_mRNA_3759.1          | -                           | -                               |
| GF0030508 | 1                            | 0                        | 0                            | 0 Kinase superfamily protein, putative isoform 3 (1)        | protein phosphorylation [GO:0006468 biological_process] (1); ATP binding [GO:0005524 molecular_function] (1)                                                                                                             | Protein kinase domain [IPRO00719] (1); Protein kinase-like domain [IPRO11009] (1)                                                                                                                                                                                                                     | scaffold_5_mRNA_3758.1          | -                           | -                               |
| GF0030507 | 1                            | 0                        | 0                            | 0 Hypothetical protein (1)                                  | protein phosphorylation [GO:0006468 biological_process] (1); protein kinase activity [GO:0004672 molecular_function] (1); ATP binding [GO:0005524 molecular_function] (1)                                                | Protein kinase domain [IPRO00719] (1); Protein kinase-like domain [IPRO11009] (1); Serine-threonine/tyrosine-protein kinase, catalytic domain [IPRO01245] (1)                                                                                                                                         | scaffold_5_mRNA_3756.1          | -                           | -                               |
| GF0030506 | 1                            | 0                        | 0                            | 0 Putative wall-associated receptor kinase-like 11 (1)      | ATP binding [GO:0005524 molecular_function] (1); protein phosphorylation [GO:0006468 biological_process] (1); protein kinase activity [GO:0004672 molecular_function] (1)                                                | Protein kinase-like domain [IPRO11009] (1); Protein kinase domain [IPRO00719] (1)                                                                                                                                                                                                                     | scaffold_5_mRNA_3755.1          | -                           | -                               |
| GF0030505 | 1                            | 0                        | 0                            | 0 Hypothetical protein (1)                                  |                                                                                                                                                                                                                          | Endonuclease/exonuclease/phosphatase [IPRO05155] (1)                                                                                                                                                                                                                                                  | scaffold_5_mRNA_3753.1          | -                           | -                               |
| GF0030504 | 1                            | 0                        | 0                            | 0 Hypothetical protein (1)                                  |                                                                                                                                                                                                                          | Protein kinase-like domain [IPRO11009] (1)                                                                                                                                                                                                                                                            | scaffold_5_mRNA_3751.1          | -                           | -                               |
| GF0030503 | 1                            | 0                        | 0                            | 0 Hypothetical protein (1)                                  |                                                                                                                                                                                                                          |                                                                                                                                                                                                                                                                                                       | scaffold_5_mRNA_3746.1          | -                           | -                               |
| GF0030502 | 1                            | 0                        | 0                            | 0 Putative disease resistance RPP13-like protein 1 (1)      | ADP binding [GO:0043531 molecular_function] (1)                                                                                                                                                                          | NB-ARC [IPRO02182] (1); P-loop containing nucleoside triphosphate hydrolase [IPRO27417] (1)                                                                                                                                                                                                           | scaffold_5_mRNA_3710.1          | -                           | -                               |
| GF0030501 | 1                            | 0                        | 0                            | 0 Hypothetical protein (1)                                  | ribosome [GO:0005840 cellular_component] (1); translation [GO:0006412 biological_process] (1); intracellular [GO:0005622 cellular_component] (1); structural constituent of ribosome [GO:0003735 molecular_function] (1) | Ribosomal protein S8e [IPRO1047] (1)                                                                                                                                                                                                                                                                  | scaffold_5_mRNA_3709.1          | -                           | -                               |
| GF0030500 | 1                            | 0                        | 0                            | 0 Putative disease resistance RGA1 (1)                      | ADP binding [GO:0043531 molecular_function] (1)                                                                                                                                                                          | NB-ARC [IPRO02182] (1); P-loop containing nucleoside triphosphate hydrolase [IPRO27417] (1); Leucine-rich repeat domain, L domain-like [IPRO32675] (1); Winged helix-turn-helix DNA-binding domain [IPRO11991] (1)                                                                                    | scaffold_5_mRNA_3707.1          | -                           | -                               |
| GF0030499 | 1                            | 0                        | 0                            | 0 Hypothetical protein (1)                                  |                                                                                                                                                                                                                          | Domain of unknown function DUF4283 [IPRO25558] (1)                                                                                                                                                                                                                                                    | scaffold_5_mRNA_3698.1          | -                           | -                               |
| GF0030498 | 1                            | 0                        | 0                            | 0 Hypothetical protein (1)                                  |                                                                                                                                                                                                                          |                                                                                                                                                                                                                                                                                                       | scaffold_5_mRNA_369.1           | -                           | -                               |
| GF0030497 | 1                            | 0                        | 0                            | 0 Hypothetical protein (1)                                  |                                                                                                                                                                                                                          |                                                                                                                                                                                                                                                                                                       | scaffold_5_mRNA_3672.1          | -                           | -                               |
| GF0030496 | 1                            | 0                        | 0                            | 0 Monosaccharide transport protein (1)                      |                                                                                                                                                                                                                          |                                                                                                                                                                                                                                                                                                       | scaffold_5_mRNA_3670.1          | -                           | -                               |
| GF0030495 | 1                            | 0                        | 0                            | 0 Cytokinin riboside 5'-monophosphate phosphoribidylase (1) |                                                                                                                                                                                                                          | LOG family [IPRO31100] (1); Cytokinin riboside 5'-monophosphate phosphoribidylase LOG [IPRO05269] (1)                                                                                                                                                                                                 | scaffold_5_mRNA_367.1           | -                           | -                               |
| GF0030494 | 1                            | 0                        | 0                            | 0 NB-ARC domain disease resistance protein (1)              | ADP binding [GO:0043531 molecular_function] (1)                                                                                                                                                                          | Winged helix-turn-helix DNA-binding domain [IPRO11991] (1); Leucine-rich repeat domain, L domain-like [IPRO32675] (1); NB-ARC [IPRO02182] (1); P-loop containing nucleoside triphosphate hydrolase [IPRO27417] (1)                                                                                    | scaffold_5_mRNA_3668.1          | -                           | -                               |
| GF0030493 | 1                            | 0                        | 0                            | 0 DNA excision repair protein ERCC-1 (1)                    | damaged DNA binding [GO:0003684 molecular_function] (1); endonuclease activity [GO:0004519 molecular_function] (1); DNA repair [GO:0006281 biological_process] (1); nucleus [GO:0005634 cellular_component] (1)          | ERCC1/RAD10/SW10 family [IPRO04579] (1); Restriction endonuclease type II-like [IPRO11335] (1); RevA domain 2-like [IPRO10994] (1)                                                                                                                                                                    | scaffold_5_mRNA_3667.1          | -                           | -                               |
| GF0030492 | 1                            | 0                        | 0                            | 0 Hypothetical protein (1)                                  | nucleic acid binding [GO:0003676 molecular_function] (1); zinc ion binding [GO:0008270 molecular_function] (1)                                                                                                           | Zinc finger, CCH-type [IPRO01878] (1); Zinc finger, PMZ-type [IPRO06564] (1)                                                                                                                                                                                                                          | scaffold_5_mRNA_3653.1          | -                           | -                               |
| GF0030491 | 1                            | 0                        | 0                            | 0 Putative disease resistance protein (1)                   | ADP binding [GO:0043531 molecular_function] (1)                                                                                                                                                                          | P-loop containing nucleoside triphosphate hydrolase [IPRO27417] (1); NB-ARC [IPRO02182] (1); Transposase, MuDR, plant [IPRO04332] (1); MULE transposase domain [IPRO18289] (1); Winged helix-turn-helix DNA-binding domain [IPRO11991] (1); Leucine-rich repeat domain, L domain-like [IPRO32675] (1) | scaffold_5_mRNA_3652.1          | -                           | -                               |
| GF0030490 | 1                            | 0                        | 0                            | 0 Hypothetical protein (1)                                  |                                                                                                                                                                                                                          |                                                                                                                                                                                                                                                                                                       | scaffold_5_mRNA_3650.1          | -                           | -                               |
| GF0030489 | 1                            | 0                        | 0                            | 0 Hypothetical protein (1)                                  |                                                                                                                                                                                                                          |                                                                                                                                                                                                                                                                                                       | scaffold_5_mRNA_3649.1          | -                           | -                               |
| GF0030488 | 1                            | 0                        | 0                            | 0 Hypothetical protein (1)                                  |                                                                                                                                                                                                                          | Leucine-rich repeat domain, L domain-like [IPRO32675] (1)                                                                                                                                                                                                                                             | scaffold_5_mRNA_3648.1          | -                           | -                               |

| ID        | Num. in <i>C. clementinae</i> | Num. in <i>C. uchiha</i> | Num. in <i>P. trifoliata</i> | Note                                                               | GO                                                                                                                                                                                                                                                                                                                                                                                                                                                  | InterPro                                                                                                                                                                                                                                                                                                    | Members in <i>C. clementinae</i> | Members in <i>C. uchiha</i> | Members in <i>P. trifoliata</i> |
|-----------|-------------------------------|--------------------------|------------------------------|--------------------------------------------------------------------|-----------------------------------------------------------------------------------------------------------------------------------------------------------------------------------------------------------------------------------------------------------------------------------------------------------------------------------------------------------------------------------------------------------------------------------------------------|-------------------------------------------------------------------------------------------------------------------------------------------------------------------------------------------------------------------------------------------------------------------------------------------------------------|----------------------------------|-----------------------------|---------------------------------|
| GF0030487 | 1                             | 0                        | 0                            | Putative non-LTR retroelement reverse transcriptase (1)            | nucleic acid binding [GO:0003676 molecular_function] (1)                                                                                                                                                                                                                                                                                                                                                                                            | Reverse transcriptase domain [IPR00477] (1); Ribonuclease H-like domain [IPR01237] (1); Reverse transcriptase zinc-binding domain [IPR026960] (1); Endonuclease/exonuclease/phosphatase [IPR05155] (1)                                                                                                      | scaffold_5_mRNA_3644.1           | -                           | -                               |
| GF0030486 | 1                             | 0                        | 0                            | Disease resistance protein (1)                                     | ADP binding [GO:0043531 molecular_function] (1)                                                                                                                                                                                                                                                                                                                                                                                                     | P-loop containing nucleoside triphosphate hydrolase [IPR027417] (1); AAA+ ATPase domain [IPR03595] (1); NB-ARC [IPR002182] (1); Leucine-rich repeat, typical subtype [IPR003591] (1); Leucine-rich repeat domain, L domain-like [IPR032675] (1); Winged helix-turn-helix DNA-binding domain [IPR011991] (1) | scaffold_5_mRNA_3643.1           | -                           | -                               |
| GF0030485 | 1                             | 0                        | 0                            | Hypothetical protein (1)                                           |                                                                                                                                                                                                                                                                                                                                                                                                                                                     | Aspartic peptidase domain [IPR021109] (1); Retrotransposon gag domain [IPR05162] (1)                                                                                                                                                                                                                        | scaffold_5_mRNA_3642.1           | -                           | -                               |
| GF0030484 | 1                             | 0                        | 0                            | Bifunctional dihydroflavonol 4-reductase/flavanone 4-reductase (1) | coenzyme binding [GO:0050662 molecular_function] (1); catalytic activity [GO:0003824 molecular_function] (1)                                                                                                                                                                                                                                                                                                                                        | NAD(P)-binding domain [IPR016040] (1); NAD-dependent epimerase/dehydratase [IPR001509] (1); Aspartic peptidase domain [IPR021109] (1); Retrotransposon gag domain [IPR05162] (1)                                                                                                                            | scaffold_5_mRNA_3634.1           | -                           | -                               |
| GF0030483 | 1                             | 0                        | 0                            | Hypothetical protein (1)                                           |                                                                                                                                                                                                                                                                                                                                                                                                                                                     | Aspartic peptidase domain [IPR021109] (1); Retrotransposon gag domain [IPR05162] (1)                                                                                                                                                                                                                        | scaffold_5_mRNA_3633.1           | -                           | -                               |
| GF0030482 | 1                             | 0                        | 0                            | Hypothetical protein (1)                                           |                                                                                                                                                                                                                                                                                                                                                                                                                                                     | Aspartic peptidase domain [IPR021109] (1); Retrotransposon gag domain [IPR05162] (1)                                                                                                                                                                                                                        | scaffold_5_mRNA_3632.1           | -                           | -                               |
| GF0030481 | 1                             | 0                        | 0                            | Hypothetical protein (1)                                           |                                                                                                                                                                                                                                                                                                                                                                                                                                                     | Aspartic peptidase domain [IPR021109] (1); Retrotransposon gag domain [IPR05162] (1)                                                                                                                                                                                                                        | scaffold_5_mRNA_3622.1           | -                           | -                               |
| GF0030480 | 1                             | 0                        | 0                            | Magnesium transporter 2 isoform 2 (1)                              | protein serine/threonine kinase activity [GO:0004674 molecular_function] (1)                                                                                                                                                                                                                                                                                                                                                                        | S-locus receptor kinase, C-terminal [IPR021820] (1)                                                                                                                                                                                                                                                         | scaffold_5_mRNA_3620.1           | -                           | -                               |
| GF0030479 | 1                             | 0                        | 0                            | Hypothetical protein (1)                                           |                                                                                                                                                                                                                                                                                                                                                                                                                                                     |                                                                                                                                                                                                                                                                                                             | scaffold_5_mRNA_3615.1           | -                           | -                               |
| GF0030478 | 1                             | 0                        | 0                            | Hypothetical protein (1)                                           |                                                                                                                                                                                                                                                                                                                                                                                                                                                     |                                                                                                                                                                                                                                                                                                             | scaffold_5_mRNA_3614.1           | -                           | -                               |
| GF0030477 | 1                             | 0                        | 0                            | Hypothetical protein (1)                                           |                                                                                                                                                                                                                                                                                                                                                                                                                                                     |                                                                                                                                                                                                                                                                                                             | scaffold_5_mRNA_3611.1           | -                           | -                               |
| GF0030476 | 1                             | 0                        | 0                            | Hypothetical protein (1)                                           |                                                                                                                                                                                                                                                                                                                                                                                                                                                     |                                                                                                                                                                                                                                                                                                             | scaffold_5_mRNA_3610.1           | -                           | -                               |
| GF0030475 | 1                             | 0                        | 0                            | Hypothetical protein (1)                                           |                                                                                                                                                                                                                                                                                                                                                                                                                                                     |                                                                                                                                                                                                                                                                                                             | scaffold_5_mRNA_3609.1           | -                           | -                               |
| GF0030474 | 1                             | 0                        | 0                            | Hypothetical protein (1)                                           |                                                                                                                                                                                                                                                                                                                                                                                                                                                     |                                                                                                                                                                                                                                                                                                             | scaffold_5_mRNA_3608.1           | -                           | -                               |
| GF0030473 | 1                             | 0                        | 0                            | Cysteine-rich receptor-like protein kinase 10 (1)                  | protein phosphorylation [GO:0006468 biological_process] (1); protein kinase activity [GO:0004672 molecular_function] (1); protein serine/threonine kinase activity [GO:0004674 molecular_function] (1); ATP binding [GO:0005524 molecular_function] (1)                                                                                                                                                                                             | Protein kinase-like domain [IPR011009] (1); Protein kinase domain [IPR000719] (1); S-locus receptor kinase, C-terminal [IPR021820] (1); Serine/threonine-protein kinase, active site [IPR008271] (1); Serine-threonine/tyrosine-protein kinase, catalytic domain [IPR001245] (1)                            | scaffold_5_mRNA_3607.1           | -                           | -                               |
| GF0030472 | 1                             | 0                        | 0                            | Cytokinin riboside 5'-monophosphate phosphoribohydrolase (1)       |                                                                                                                                                                                                                                                                                                                                                                                                                                                     | LOG family [IPR031100] (1)                                                                                                                                                                                                                                                                                  | scaffold_5_mRNA_3603.1           | -                           | -                               |
| GF0030471 | 1                             | 0                        | 0                            | Hypothetical protein (1)                                           |                                                                                                                                                                                                                                                                                                                                                                                                                                                     |                                                                                                                                                                                                                                                                                                             | scaffold_5_mRNA_3602.1           | -                           | -                               |
| GF0030470 | 1                             | 0                        | 0                            | NB-ARC domain-containing disease resistance protein (1)            | ADP binding [GO:0043531 molecular_function] (1)                                                                                                                                                                                                                                                                                                                                                                                                     | P-loop containing nucleoside triphosphate hydrolase [IPR027417] (1); NB-ARC [IPR002182] (1)                                                                                                                                                                                                                 | scaffold_5_mRNA_361              | -                           | -                               |
| GF0030469 | 1                             | 0                        | 0                            | Cytokinin riboside 5'-monophosphate phosphoribohydrolase (1)       |                                                                                                                                                                                                                                                                                                                                                                                                                                                     | LOG family [IPR031100] (1)                                                                                                                                                                                                                                                                                  | scaffold_5_mRNA_3597.1           | -                           | -                               |
| GF0030468 | 1                             | 0                        | 0                            | Hypothetical protein (1)                                           |                                                                                                                                                                                                                                                                                                                                                                                                                                                     |                                                                                                                                                                                                                                                                                                             | scaffold_5_mRNA_3596.1           | -                           | -                               |
| GF0030467 | 1                             | 0                        | 0                            | Hypothetical protein (1)                                           |                                                                                                                                                                                                                                                                                                                                                                                                                                                     |                                                                                                                                                                                                                                                                                                             | scaffold_5_mRNA_3594.1           | -                           | -                               |
| GF0030466 | 1                             | 0                        | 0                            | AT1G08890 protein (1)                                              | transmembrane transporter activity [GO:0022857 molecular_function] (1); integral component of membrane [GO:0016021 cellular_component] (1); transmembrane transport [GO:0055085 biological_process] (1)                                                                                                                                                                                                                                             | Major facilitator, sugar transporter-like [IPR005828] (1)                                                                                                                                                                                                                                                   | scaffold_5_mRNA_3593.1           | -                           | -                               |
| GF0030465 | 1                             | 0                        | 0                            | Sodium/hydrogen exchanger 2 (1)                                    | transmembrane transport [GO:0055085 biological_process] (1); solute proton antiporter activity [GO:0015299 molecular_function] (1); sodium ion transport [GO:0006814 biological_process] (1); integral component of membrane [GO:0016021 cellular_component] (1); sodium/proton antiporter activity [GO:0015385 molecular_function] (1); regulation of pH [GO:0006885 biological_process] (1); cation transport [GO:0006812 biological_process] (1) | Cation/H <sup>+</sup> exchanger [IPR006153] (1); Na <sup>+</sup> /H <sup>+</sup> exchanger [IPR004709] (1); Cation/H <sup>+</sup> exchanger, CPA1 family [IPR018422] (1)                                                                                                                                    | scaffold_5_mRNA_3582.1           | -                           | -                               |
| GF0030464 | 1                             | 0                        | 0                            | Hypothetical protein (1)                                           | protein binding [GO:0005515 molecular_function] (1)                                                                                                                                                                                                                                                                                                                                                                                                 | F-box domain [IPR018110] (1); Leucine-rich repeat domain, L domain-like [IPR032675] (1)                                                                                                                                                                                                                     | scaffold_5_mRNA_3578.1           | -                           | -                               |
| GF0030463 | 1                             | 0                        | 0                            | Phosphoprotein phosphatase (1)                                     |                                                                                                                                                                                                                                                                                                                                                                                                                                                     | Leucine-rich repeat domain, L domain-like [IPR032675] (1)                                                                                                                                                                                                                                                   | scaffold_5_mRNA_3576.1           | -                           | -                               |
| GF0030462 | 1                             | 0                        | 0                            | Hypothetical protein (1)                                           |                                                                                                                                                                                                                                                                                                                                                                                                                                                     |                                                                                                                                                                                                                                                                                                             | scaffold_5_mRNA_3573.1           | -                           | -                               |
| GF0030461 | 1                             | 0                        | 0                            | Disease resistance protein (CC-LRR class) family protein (1)       | ADP binding [GO:0043531 molecular_function] (1)                                                                                                                                                                                                                                                                                                                                                                                                     | NB-ARC [IPR002182] (1); P-loop containing nucleoside triphosphate hydrolase [IPR027417] (1); Leucine-rich repeat domain, L domain-like [IPR032675] (1); Winged helix-turn-helix DNA-binding domain [IPR011991] (1)                                                                                          | scaffold_5_mRNA_3572.1           | -                           | -                               |
| GF0030460 | 1                             | 0                        | 0                            | Hypothetical protein (1)                                           |                                                                                                                                                                                                                                                                                                                                                                                                                                                     |                                                                                                                                                                                                                                                                                                             | scaffold_5_mRNA_3571.1           | -                           | -                               |
| GF0030459 | 1                             | 0                        | 0                            | Disease resistance RPS2-like protein (1)                           |                                                                                                                                                                                                                                                                                                                                                                                                                                                     | Leucine-rich repeat domain, L domain-like [IPR032675] (1)                                                                                                                                                                                                                                                   | scaffold_5_mRNA_3570.1           | -                           | -                               |
| GF0030458 | 1                             | 0                        | 0                            | Monosaccharide transport protein (1)                               |                                                                                                                                                                                                                                                                                                                                                                                                                                                     |                                                                                                                                                                                                                                                                                                             | scaffold_5_mRNA_3569.1           | -                           | -                               |
| GF0030457 | 1                             | 0                        | 0                            | Hypothetical protein (1)                                           |                                                                                                                                                                                                                                                                                                                                                                                                                                                     |                                                                                                                                                                                                                                                                                                             | scaffold_5_mRNA_3568.1           | -                           | -                               |
| GF0030456 | 1                             | 0                        | 0                            | Hypothetical protein (1)                                           |                                                                                                                                                                                                                                                                                                                                                                                                                                                     | Retrotransposon gag domain [IPR05162] (1)                                                                                                                                                                                                                                                                   | scaffold_5_mRNA_3566.1           | -                           | -                               |
| GF0030455 | 1                             | 0                        | 0                            | Protein BONZAI 3 (1)                                               | calcium-dependent phospholipid binding [GO:0005544 molecular_function] (1); protein binding [GO:0005515 molecular_function] (1); negative regulation of cell death [GO:0060548 biological_process] (1)                                                                                                                                                                                                                                              | von Willebrand factor, type A [IPR020355] (1); C2 domain [IPR000008] (1); Protein BONZAI [IPR031116] (1); Copine [IPR010734] (1)                                                                                                                                                                            | scaffold_5_mRNA_3562.1           | -                           | -                               |
| GF0030454 | 1                             | 0                        | 0                            | Hypothetical protein (1)                                           |                                                                                                                                                                                                                                                                                                                                                                                                                                                     | P-loop containing nucleoside triphosphate hydrolase [IPR027417] (1)                                                                                                                                                                                                                                         | scaffold_5_mRNA_3561.1           | -                           | -                               |
| GF0030453 | 1                             | 0                        | 0                            | Hypothetical protein (1)                                           |                                                                                                                                                                                                                                                                                                                                                                                                                                                     |                                                                                                                                                                                                                                                                                                             | scaffold_5_mRNA_3560.1           | -                           | -                               |
| GF0030452 | 1                             | 0                        | 0                            | Hypothetical protein (1)                                           | proteolysis [GO:0006508 biological_process] (1); cysteine-type peptidase activity [GO:0008234 molecular_function] (1)                                                                                                                                                                                                                                                                                                                               | Domain of unknown function DUF1985 [IPR015410] (1); Ulp1 protease family, C-terminal catalytic domain [IPR003653] (1)                                                                                                                                                                                       | scaffold_5_mRNA_356              | -                           | -                               |
| GF0030451 | 1                             | 0                        | 0                            | Hypothetical protein (1)                                           |                                                                                                                                                                                                                                                                                                                                                                                                                                                     |                                                                                                                                                                                                                                                                                                             | scaffold_5_mRNA_3559.1           | -                           | -                               |
| GF0030450 | 1                             | 0                        | 0                            | Retrotransposon protein, putative, Ty3-gypsy subclass (1)          | nucleic acid binding [GO:0003676 molecular_function] (1); RNA-DNA hybrid ribonuclease activity [GO:0004523 molecular_function] (1); DNA integration [GO:0015074 biological_process] (1)                                                                                                                                                                                                                                                             | Ribonuclease H domain [IPR002156] (1); Integrase, catalytic core [IPR001584] (1); Ribonuclease H-like domain [IPR01237] (1); Retrotransposon gag domain [IPR005162] (1); Aspartic peptidase domain [IPR021109] (1)                                                                                          | scaffold_5_mRNA_3558.1           | -                           | -                               |
| GF0030449 | 1                             | 0                        | 0                            | Hypothetical protein (1)                                           |                                                                                                                                                                                                                                                                                                                                                                                                                                                     |                                                                                                                                                                                                                                                                                                             | scaffold_5_mRNA_3553.1           | -                           | -                               |
| GF0030448 | 1                             | 0                        | 0                            | Cytokinin riboside 5'-monophosphate phosphoribohydrolase (1)       |                                                                                                                                                                                                                                                                                                                                                                                                                                                     | Cytokinin riboside 5'-monophosphate phosphoribohydrolase LOG [IPR005269] (1); LOG family [IPR031100] (1)                                                                                                                                                                                                    | scaffold_5_mRNA_3552.1           | -                           | -                               |
| GF0030447 | 1                             | 0                        | 0                            | Hypothetical protein (1)                                           |                                                                                                                                                                                                                                                                                                                                                                                                                                                     |                                                                                                                                                                                                                                                                                                             | scaffold_5_mRNA_3551.1           | -                           | -                               |
| GF0030446 | 1                             | 0                        | 0                            | Retrotransposon gag protein (1)                                    |                                                                                                                                                                                                                                                                                                                                                                                                                                                     |                                                                                                                                                                                                                                                                                                             | scaffold_5_mRNA_3550.1           | -                           | -                               |
| GF0030445 | 1                             | 0                        | 0                            | Hypothetical protein (1)                                           | zinc ion binding [GO:0008270 molecular_function] (1); cysteine-type peptidase activity [GO:0008234 molecular_function] (1); proteolysis [GO:0006508 biological_process] (1)                                                                                                                                                                                                                                                                         | Zinc finger, PMZ-type [IPR006564] (1); Zinc finger, SWIM-type [IPR007327] (1)                                                                                                                                                                                                                               | scaffold_5_mRNA_3548.1           | -                           | -                               |
| GF0030444 | 1                             | 0                        | 0                            | Hypothetical protein (1)                                           |                                                                                                                                                                                                                                                                                                                                                                                                                                                     | Domain of unknown function DUF1985 [IPR015410] (1); Ulp1 protease family, C-terminal catalytic domain [IPR003653] (1)                                                                                                                                                                                       | scaffold_5_mRNA_3547.1           | -                           | -                               |
| GF0030443 | 1                             | 0                        | 0                            | Hypothetical protein (1)                                           |                                                                                                                                                                                                                                                                                                                                                                                                                                                     |                                                                                                                                                                                                                                                                                                             | scaffold_5_mRNA_3545.1           | -                           | -                               |
| GF0030442 | 1                             | 0                        | 0                            | Hypothetical protein (1)                                           |                                                                                                                                                                                                                                                                                                                                                                                                                                                     |                                                                                                                                                                                                                                                                                                             | scaffold_5_mRNA_3543.1           | -                           | -                               |
| GF0030441 | 1                             | 0                        | 0                            | Protein BONZAI 3 (1)                                               | calcium-dependent phospholipid binding [GO:0005544 molecular_function] (1); protein binding [GO:0005515 molecular_function] (1); negative regulation of cell death [GO:0060548 biological_process] (1)                                                                                                                                                                                                                                              | Protein BONZAI [IPR031116] (1); C2 domain [IPR000008] (1); Copine [IPR010734] (1); von Willebrand factor, type A [IPR020355] (1)                                                                                                                                                                            | scaffold_5_mRNA_3541.1           | -                           | -                               |
| GF0030440 | 1                             | 0                        | 0                            | NBS-LRR type disease resistance protein (1)                        | ADP binding [GO:0043531 molecular_function] (1)                                                                                                                                                                                                                                                                                                                                                                                                     | P-loop containing nucleoside triphosphate hydrolase [IPR027417] (1); NB-ARC [IPR002182] (1)                                                                                                                                                                                                                 | scaffold_5_mRNA_3532.1           | -                           | -                               |
| GF0030439 | 1                             | 0                        | 0                            | Hypothetical protein (1)                                           | nucleic acid binding [GO:0003676 molecular_function] (1); RNA-DNA hybrid ribonuclease activity [GO:0004523 molecular_function] (1)                                                                                                                                                                                                                                                                                                                  | Ribonuclease H-like domain [IPR01237] (1); Ribonuclease H domain [IPR02161] (1); Retrotransposon gag domain [IPR005162] (1)                                                                                                                                                                                 | scaffold_5_mRNA_3531.1           | -                           | -                               |
| GF0030438 | 1                             | 0                        | 0                            | Monosaccharide transport protein (1)                               |                                                                                                                                                                                                                                                                                                                                                                                                                                                     |                                                                                                                                                                                                                                                                                                             | scaffold_5_mRNA_3530.1           | -                           | -                               |

| ID        | Num. in <i>C. clementinae</i> | Num. in <i>C. uashba</i> | Num. in <i>P. trifoliata</i> | Note                                                             | GO                                                                                                                                                                                                                                                          | InterPro                                                                                                                                                                                                                                                                                                                           | Members in <i>C. clementinae</i> | Members in <i>C. uashba</i> | Members in <i>P. trifoliata</i> |
|-----------|-------------------------------|--------------------------|------------------------------|------------------------------------------------------------------|-------------------------------------------------------------------------------------------------------------------------------------------------------------------------------------------------------------------------------------------------------------|------------------------------------------------------------------------------------------------------------------------------------------------------------------------------------------------------------------------------------------------------------------------------------------------------------------------------------|----------------------------------|-----------------------------|---------------------------------|
| GF0030437 | 1                             | 0                        | 0                            | Disease resistance protein RPS2, putative (1)                    | ADP binding [GO:0043531] molecular_function (1)                                                                                                                                                                                                             | P-loop containing nucleoside triphosphate hydrolase [IPR027417] (1); NB-ARC [IPR02182] (1); Winged helix-turn-helix DNA-binding domain [IPR011991] (1); Leucine-rich repeat domain, L domain-like [IPR032675] (1)                                                                                                                  | scaffold_5_mRNA_3529.1           | -                           | -                               |
| GF0030436 | 1                             | 0                        | 0                            | Protein BONZAI 1 (1)                                             | protein binding [GO:0005515] molecular_function (1); calcium-dependent phospholipid binding [GO:0005544] molecular_function (1); negative regulation of cell death [GO:0060548] biological_process (1)                                                      | von Willebrand factor, type A [IPR020351] (1); Protein BONZAI [IPR031116] (1); C2 domain [IPR000008] (1); Copine [IPR010734] (1)                                                                                                                                                                                                   | scaffold_5_mRNA_3525.1           | -                           | -                               |
| GF0030435 | 1                             | 0                        | 0                            | Hypothetical protein (1)                                         |                                                                                                                                                                                                                                                             | GAG-pre-integrase domain [IPR025724] (1)                                                                                                                                                                                                                                                                                           | scaffold_5_mRNA_3523.1           | -                           | -                               |
| GF0030434 | 1                             | 0                        | 0                            | Hypothetical protein (1)                                         |                                                                                                                                                                                                                                                             |                                                                                                                                                                                                                                                                                                                                    | scaffold_5_mRNA_3521.1           | -                           | -                               |
| GF0030433 | 1                             | 0                        | 0                            | Hypothetical protein (1)                                         |                                                                                                                                                                                                                                                             |                                                                                                                                                                                                                                                                                                                                    | scaffold_5_mRNA_3520.1           | -                           | -                               |
| GF0030432 | 1                             | 0                        | 0                            | Hypothetical protein (1)                                         |                                                                                                                                                                                                                                                             | P-loop containing nucleoside triphosphate hydrolase [IPR027417] (1)                                                                                                                                                                                                                                                                | scaffold_5_mRNA_3521.1           | -                           | -                               |
| GF0030431 | 1                             | 0                        | 0                            | Hypothetical protein (1)                                         | cysteine-type peptidase activity [GO:0000224] molecular_function (1); proteolysis [GO:0006508] biological_process (1)                                                                                                                                       | Domain of unknown function DUF1985 [IPR015410] (1); Ulp1 protease family, C-terminal catalytic domain [IPR003653] (1)                                                                                                                                                                                                              | scaffold_5_mRNA_3519.1           | -                           | -                               |
| GF0030430 | 1                             | 0                        | 0                            | Similarity to non-LTR retroelement reverse transcriptase (1)     |                                                                                                                                                                                                                                                             | Reverse transcriptase domain [IPR00477] (1)                                                                                                                                                                                                                                                                                        | scaffold_5_mRNA_3517.1           | -                           | -                               |
| GF0030429 | 1                             | 0                        | 0                            | Non-LTR retroelement reverse transcriptase-like (1)              | nucleic acid binding [GO:0003676] molecular_function (1)                                                                                                                                                                                                    | Reverse transcriptase zinc-binding domain [IPR026960] (1); Ribonuclease H-like domain [IPR012337] (1)                                                                                                                                                                                                                              | scaffold_5_mRNA_3516.1           | -                           | -                               |
| GF0030428 | 1                             | 0                        | 0                            | RNA-directed DNA polymerase (Reverse transcriptase) (1)          | nucleic acid binding [GO:0003676] molecular_function (1)                                                                                                                                                                                                    | Ribonuclease H-like domain [IPR012337] (1); Reverse transcriptase domain [IPR000477] (1)                                                                                                                                                                                                                                           | scaffold_5_mRNA_3515.1           | -                           | -                               |
| GF0030427 | 1                             | 0                        | 0                            | NBS-LRR type disease resistance protein (1)                      | ADP binding [GO:0043531] molecular_function (1)                                                                                                                                                                                                             | NB-ARC [IPR02182] (1); P-loop containing nucleoside triphosphate hydrolase [IPR027417] (1)                                                                                                                                                                                                                                         | scaffold_5_mRNA_3512.1           | -                           | -                               |
| GF0030426 | 1                             | 0                        | 0                            | Disease resistance protein (CC-NBS-LRR class) family protein (1) | ADP binding [GO:0043531] molecular_function (1)                                                                                                                                                                                                             | Leucine-rich repeat, typical subtype [IPR03591] (1); Leucine-rich repeat domain, L domain-like [IPR032675] (1); Winged helix-turn-helix DNA-binding domain [IPR011991] (1); NB-ARC [IPR02182] (1); P-loop containing nucleoside triphosphate hydrolase [IPR027417] (1)                                                             | scaffold_5_mRNA_3511.1           | -                           | -                               |
| GF0030425 | 1                             | 0                        | 0                            | Hypothetical protein (1)                                         | negative regulation of cell death [GO:0060548] biological_process (1); calcium-dependent phospholipid binding [GO:0005544] molecular_function (1); protein binding [GO:0005515] molecular_function (1)                                                      | Copine [IPR010734] (1); Protein BONZAI [IPR031116] (1); C2 domain [IPR000008] (1); von Willebrand factor, type A [IPR020351] (1); Development/cell death domain [IPR013989] (1)                                                                                                                                                    | scaffold_5_mRNA_3510.1           | -                           | -                               |
| GF0030424 | 1                             | 0                        | 0                            | Hypothetical protein (1)                                         |                                                                                                                                                                                                                                                             |                                                                                                                                                                                                                                                                                                                                    | scaffold_5_mRNA_3498.1           | -                           | -                               |
| GF0030423 | 1                             | 0                        | 0                            | Hypothetical protein (1)                                         |                                                                                                                                                                                                                                                             |                                                                                                                                                                                                                                                                                                                                    | scaffold_5_mRNA_3495.1           | -                           | -                               |
| GF0030422 | 1                             | 0                        | 0                            | Hypothetical protein (1)                                         |                                                                                                                                                                                                                                                             | Endonuclease/exonuclease/phosphatase [IPR005155] (1)                                                                                                                                                                                                                                                                               | scaffold_5_mRNA_3490.1           | -                           | -                               |
| GF0030421 | 1                             | 0                        | 0                            | Hypothetical protein (1)                                         |                                                                                                                                                                                                                                                             | Domain of unknown function DUF4283 [IPR025588] (1); Zinc knuckle CXC2N4HXK [IPR025836] (1)                                                                                                                                                                                                                                         | scaffold_5_mRNA_3484.1           | -                           | -                               |
| GF0030420 | 1                             | 0                        | 0                            | Hypothetical protein (1)                                         |                                                                                                                                                                                                                                                             |                                                                                                                                                                                                                                                                                                                                    | scaffold_5_mRNA_3482.1           | -                           | -                               |
| GF0030419 | 1                             | 0                        | 0                            | Superoxide dismutase [Cu-Zn] (1)                                 | superoxide dismutase activity [GO:0004784] molecular_function (1); metal ion binding [GO:0046872] molecular_function (1); superoxide metabolic process [GO:0006801] biological_process (1); oxidation-reduction process [GO:0055114] biological_process (1) | Superoxide dismutase, copper/zinc, binding site [IPR018152] (1); Superoxide dismutase, copper/zinc binding domain [IPR001424] (1)                                                                                                                                                                                                  | scaffold_5_mRNA_3481.1           | -                           | -                               |
| GF0030418 | 1                             | 0                        | 0                            | Hypothetical protein (1)                                         |                                                                                                                                                                                                                                                             |                                                                                                                                                                                                                                                                                                                                    | scaffold_5_mRNA_3476.1           | -                           | -                               |
| GF0030417 | 1                             | 0                        | 0                            | Hypothetical protein (1)                                         |                                                                                                                                                                                                                                                             |                                                                                                                                                                                                                                                                                                                                    | scaffold_5_mRNA_3474.1           | -                           | -                               |
| GF0030416 | 1                             | 0                        | 0                            | Ras-like GTP-binding protein YPT1 (1)                            | GTPase activity [GO:0003924] molecular_function (1); GTP binding [GO:0005525] molecular_function (1)                                                                                                                                                        | Small GTP-binding protein domain [IPR005225] (1); Small GTPase superfamily [IPR018080] (1); P-loop containing nucleoside triphosphate hydrolase [IPR027417] (1)                                                                                                                                                                    | scaffold_5_mRNA_3471.1           | -                           | -                               |
| GF0030415 | 1                             | 0                        | 0                            | Hypothetical protein (1)                                         |                                                                                                                                                                                                                                                             |                                                                                                                                                                                                                                                                                                                                    | scaffold_5_mRNA_3464.1           | -                           | -                               |
| GF0030414 | 1                             | 0                        | 0                            | Hypothetical protein (1)                                         |                                                                                                                                                                                                                                                             |                                                                                                                                                                                                                                                                                                                                    | scaffold_5_mRNA_3459.1           | -                           | -                               |
| GF0030413 | 1                             | 0                        | 0                            | Hypothetical protein (1)                                         | proteolysis [GO:0006508] biological_process (1); aspartic-type endopeptidase activity [GO:0004190] molecular_function (1)                                                                                                                                   | Xylanase inhibitor, N-terminal [IPR02861] (1); Xylanase inhibitor, C-terminal [IPR032799] (1); Aspartic peptidase A1 family [IPR001461] (1); Aspartic peptidase, active site [IPR01969] (1); Pepsin-like domain, plant [IPR034161] (1); Aspartic peptidase domain [IPR021109] (1); Peptidase family A1 domain [IPR033121] (1)      | scaffold_5_mRNA_3452.1           | -                           | -                               |
| GF0030412 | 1                             | 0                        | 0                            | Hypothetical protein (1)                                         |                                                                                                                                                                                                                                                             | Small heat shock protein HSP20 [IPR031107] (1); HSP20-like chaperone [IPR008978] (1); Alpha crystallin/Hsp20 domain [IPR020068] (1)                                                                                                                                                                                                | scaffold_5_mRNA_3451.1           | -                           | -                               |
| GF0030411 | 1                             | 0                        | 0                            | Hypothetical protein (1)                                         |                                                                                                                                                                                                                                                             |                                                                                                                                                                                                                                                                                                                                    | scaffold_5_mRNA_3445.1           | -                           | -                               |
| GF0030410 | 1                             | 0                        | 0                            | Hypothetical protein (1)                                         |                                                                                                                                                                                                                                                             |                                                                                                                                                                                                                                                                                                                                    | scaffold_5_mRNA_3438.1           | -                           | -                               |
| GF0030409 | 1                             | 0                        | 0                            | Hypothetical protein (1)                                         |                                                                                                                                                                                                                                                             |                                                                                                                                                                                                                                                                                                                                    | scaffold_5_mRNA_3435.1           | -                           | -                               |
| GF0030408 | 1                             | 0                        | 0                            | Hypothetical protein (1)                                         |                                                                                                                                                                                                                                                             | Retrotransposon gag domain [IPR005162] (1)                                                                                                                                                                                                                                                                                         | scaffold_5_mRNA_3434.1           | -                           | -                               |
| GF0030407 | 1                             | 0                        | 0                            | Cysteine synthase (1)                                            | cysteine synthase activity [GO:0004124] molecular_function (1); cysteine biosynthetic process from serine [GO:0006535] biological_process (1)                                                                                                               | Cysteine synthase CysK [IPR005859] (1); Cysteine synthase [IPR005566] (1); Tryptophan synthase beta subunit-like PLP-dependent enzyme [IPR01926] (1); Cysteine synthase/cystathionine beta-synthase, pyridoxal-phosphate attachment site [IPR001216] (1)                                                                           | scaffold_5_mRNA_3425.1           | -                           | -                               |
| GF0030406 | 1                             | 0                        | 0                            | Monosaccharide transport protein (1)                             |                                                                                                                                                                                                                                                             |                                                                                                                                                                                                                                                                                                                                    | scaffold_5_mRNA_342.1            | -                           | -                               |
| GF0030405 | 1                             | 0                        | 0                            | Hypothetical protein (1)                                         |                                                                                                                                                                                                                                                             |                                                                                                                                                                                                                                                                                                                                    | scaffold_5_mRNA_3415.1           | -                           | -                               |
| GF0030404 | 1                             | 0                        | 0                            | Hypothetical protein (1)                                         |                                                                                                                                                                                                                                                             |                                                                                                                                                                                                                                                                                                                                    | scaffold_5_mRNA_341.1            | -                           | -                               |
| GF0030403 | 1                             | 0                        | 0                            | Hypothetical protein (1)                                         |                                                                                                                                                                                                                                                             |                                                                                                                                                                                                                                                                                                                                    | scaffold_5_mRNA_3399.1           | -                           | -                               |
| GF0030402 | 1                             | 0                        | 0                            | Disease resistance protein (1)                                   | ADP binding [GO:0043531] molecular_function (1)                                                                                                                                                                                                             | P-loop containing nucleoside triphosphate hydrolase [IPR027417] (1); NB-ARC [IPR02182] (1); AAA+ ATPase domain [IPR003593] (1); Leucine-rich repeat domain, L domain-like [IPR032675] (1); Winged helix-turn-helix DNA-binding domain [IPR011991] (1)                                                                              | scaffold_5_mRNA_3398.1           | -                           | -                               |
| GF0030401 | 1                             | 0                        | 0                            | Disease resistance protein (1)                                   | ADP binding [GO:0043531] molecular_function (1); binding [GO:0005488] molecular_function (1); protein binding [GO:0005515] molecular_function (1)                                                                                                           | NB-ARC [IPR02182] (1); Armadillo-type fold [IPR016024] (1); P-loop containing nucleoside triphosphate hydrolase [IPR027417] (1); Atypical Arm repeat [IPR032413] (1); Leucine-rich repeat domain, L domain-like [IPR032675] (1); Winged helix-turn-helix DNA-binding domain [IPR011991] (1); Armadillo-like helical [IPR01989] (1) | scaffold_5_mRNA_3397.1           | -                           | -                               |
| GF0030400 | 1                             | 0                        | 0                            | NBS-LRR type disease resistance protein (1)                      | ADP binding [GO:0043531] molecular_function (1)                                                                                                                                                                                                             | Winged helix-turn-helix DNA-binding domain [IPR011991] (1); NB-ARC [IPR02182] (1); P-loop containing nucleoside triphosphate hydrolase [IPR027417] (1)                                                                                                                                                                             | scaffold_5_mRNA_3396.1           | -                           | -                               |
| GF0030399 | 1                             | 0                        | 0                            | Hypothetical protein (1)                                         |                                                                                                                                                                                                                                                             |                                                                                                                                                                                                                                                                                                                                    | scaffold_5_mRNA_3395.1           | -                           | -                               |
| GF0030398 | 1                             | 0                        | 0                            | Disease resistance protein (CC-NBS-LRR class) family protein (1) | ADP binding [GO:0043531] molecular_function (1)                                                                                                                                                                                                             | P-loop containing nucleoside triphosphate hydrolase [IPR027417] (1); NB-ARC [IPR02182] (1); Leucine-rich repeat domain, L domain-like [IPR032675] (1); Winged helix-turn-helix DNA-binding domain [IPR011991] (1)                                                                                                                  | scaffold_5_mRNA_3394.1           | -                           | -                               |
| GF0030397 | 1                             | 0                        | 0                            | Hypothetical protein (1)                                         |                                                                                                                                                                                                                                                             |                                                                                                                                                                                                                                                                                                                                    | scaffold_5_mRNA_3389.1           | -                           | -                               |
| GF0030396 | 1                             | 0                        | 0                            | Monosaccharide transport protein (1)                             |                                                                                                                                                                                                                                                             |                                                                                                                                                                                                                                                                                                                                    | scaffold_5_mRNA_3377.1           | -                           | -                               |
| GF0030395 | 1                             | 0                        | 0                            | Hypothetical protein (1)                                         |                                                                                                                                                                                                                                                             | Retrotransposon gag domain [IPR005162] (1); Aspartic peptidase domain [IPR021109] (1)                                                                                                                                                                                                                                              | scaffold_5_mRNA_3376.1           | -                           | -                               |
| GF0030394 | 1                             | 0                        | 0                            | Hypothetical protein (1)                                         |                                                                                                                                                                                                                                                             |                                                                                                                                                                                                                                                                                                                                    | scaffold_5_mRNA_3374.1           | -                           | -                               |
| GF0030393 | 1                             | 0                        | 0                            | Hypothetical protein (1)                                         | ADP binding [GO:0043531] molecular_function (1)                                                                                                                                                                                                             | P-loop containing nucleoside triphosphate hydrolase [IPR027417] (1); NB-ARC [IPR02182] (1)                                                                                                                                                                                                                                         | scaffold_5_mRNA_3371.1           | -                           | -                               |

| ID        | Num. in <i>C. clementiae</i> | Num. in <i>C. uchiha</i> | Num. in <i>P. trifoliata</i> | Note                                                                        | GO                                                                                                                                                                                                                                                                            | InterPro                                                                                                                                                                                                                                                                                                                                                                                            | Members in <i>C. clementiae</i> | Members in <i>C. uchiha</i> | Members in <i>P. trifoliata</i> |
|-----------|------------------------------|--------------------------|------------------------------|-----------------------------------------------------------------------------|-------------------------------------------------------------------------------------------------------------------------------------------------------------------------------------------------------------------------------------------------------------------------------|-----------------------------------------------------------------------------------------------------------------------------------------------------------------------------------------------------------------------------------------------------------------------------------------------------------------------------------------------------------------------------------------------------|---------------------------------|-----------------------------|---------------------------------|
| GF0030392 | 1                            | 0                        | 0                            | 0 Hypothetical protein (1)                                                  | RNA-DNA hybrid ribonuclease activity [GO:004523 molecular_function] (1); ADP binding [GO:0043531 molecular_function] (1); nucleic acid binding [GO:0003676 molecular_function] (1)                                                                                            | P-loop containing nucleoside triphosphate hydrolase [IPRO27417] (1); NB-ARC [IPRO23275] (1); Reverse transcriptase zinc-binding domain [IPRO26960] (1); Ribonuclease H-like domain [IPRO12337] (1); Receptor L-domain [IPRO00494] (1); Ribonuclease H domain [IPRO02156] (1); Leucine-rich repeat domain, L domain-like [IPRO32675] (1)                                                             | scaffold_5_mRNA_337.1           | -                           | -                               |
| GF0030391 | 1                            | 0                        | 0                            | 0 Monosaccharide transport protein (1)                                      |                                                                                                                                                                                                                                                                               | Leucine-rich repeat domain, L domain-like [IPRO32675] (1); Winged helix-turn-helix DNA-binding domain [IPRO11991] (1); P-loop containing nucleoside triphosphate hydrolase [IPRO27417] (1); NB-ARC [IPRO02182] (1)                                                                                                                                                                                  | scaffold_5_mRNA_3361.1          | -                           | -                               |
| GF0030390 | 1                            | 0                        | 0                            | 0 LRR and NB-ARC domain disease resistance protein (1)                      | ADP binding [GO:0043531 molecular_function] (1)                                                                                                                                                                                                                               | Leucine-rich repeat domain, L domain-like [IPRO32675] (1); Winged helix-turn-helix DNA-binding domain [IPRO11991] (1); P-loop containing nucleoside triphosphate hydrolase [IPRO27417] (1); NB-ARC [IPRO02182] (1)                                                                                                                                                                                  | scaffold_5_mRNA_336.1           | -                           | -                               |
| GF0030389 | 1                            | 0                        | 0                            | 0 Retrotransposon protein, putative, Ty3-gypsy subclass (1)                 |                                                                                                                                                                                                                                                                               | Aspartic peptidase domain [IPRO21109] (1)                                                                                                                                                                                                                                                                                                                                                           | scaffold_5_mRNA_3359.1          | -                           | -                               |
| GF0030388 | 1                            | 0                        | 0                            | 0 Hypothetical protein (1)                                                  |                                                                                                                                                                                                                                                                               |                                                                                                                                                                                                                                                                                                                                                                                                     | scaffold_5_mRNA_3357.1          | -                           | -                               |
| GF0030387 | 1                            | 0                        | 0                            | 0 Hypothetical protein (1)                                                  | oxidoreductase activity [GO:0016491 molecular_function] (1); oxidation-reduction process [GO:0055114 biological_process] (1)                                                                                                                                                  | FAD/NAD(P)-binding domain [IPRO23753] (1); Lin-54 family [IPRO28307] (1)                                                                                                                                                                                                                                                                                                                            | scaffold_5_mRNA_3351.1          | -                           | -                               |
| GF0030386 | 1                            | 0                        | 0                            | 0 Hypothetical protein (1)                                                  |                                                                                                                                                                                                                                                                               |                                                                                                                                                                                                                                                                                                                                                                                                     | scaffold_5_mRNA_3349.1          | -                           | -                               |
| GF0030385 | 1                            | 0                        | 0                            | 0 Hypothetical protein (1)                                                  |                                                                                                                                                                                                                                                                               |                                                                                                                                                                                                                                                                                                                                                                                                     | scaffold_5_mRNA_3348.1          | -                           | -                               |
| GF0030384 | 1                            | 0                        | 0                            | 0 Hypothetical protein (1)                                                  |                                                                                                                                                                                                                                                                               | Retrotransposon gag domain [IPRO05162] (1)                                                                                                                                                                                                                                                                                                                                                          | scaffold_5_mRNA_3347.1          | -                           | -                               |
| GF0030383 | 1                            | 0                        | 0                            | 0 Disease resistance protein (CC-NBS-LRR class) family protein (1)          | ADP binding [GO:0043531 molecular_function] (1)                                                                                                                                                                                                                               | NB-ARC [IPRO02182] (1); AAA+ ATPase domain [IPRO03593] (1); P-loop containing nucleoside triphosphate hydrolase [IPRO27417] (1); Winged helix-turn-helix DNA-binding domain [IPRO11991] (1); Leucine-rich repeat domain, L domain-like [IPRO32675] (1)                                                                                                                                              | scaffold_5_mRNA_3343.1          | -                           | -                               |
| GF0030382 | 1                            | 0                        | 0                            | 0 Hypothetical protein (1)                                                  | nucleic acid binding [GO:0003676 molecular_function] (1)                                                                                                                                                                                                                      | Ribonuclease H-like domain [IPRO12337] (1)                                                                                                                                                                                                                                                                                                                                                          | scaffold_5_mRNA_3342.1          | -                           | -                               |
| GF0030381 | 1                            | 0                        | 0                            | 0 Disease resistance protein (CC-NBS-LRR class) family protein (1)          | ADP binding [GO:0043531 molecular_function] (1)                                                                                                                                                                                                                               | P-loop containing nucleoside triphosphate hydrolase [IPRO27417] (1); NB-ARC [IPRO02182] (1); Winged helix-turn-helix DNA-binding domain [IPRO11991] (1); Leucine-rich repeat domain, L domain-like [IPRO32675] (1)                                                                                                                                                                                  | scaffold_5_mRNA_3341.1          | -                           | -                               |
| GF0030380 | 1                            | 0                        | 0                            | 0 Hypothetical protein (1)                                                  |                                                                                                                                                                                                                                                                               |                                                                                                                                                                                                                                                                                                                                                                                                     | scaffold_5_mRNA_334.1           | -                           | -                               |
| GF0030379 | 1                            | 0                        | 0                            | 0 Hypothetical protein (1)                                                  |                                                                                                                                                                                                                                                                               | Retrotransposon gag domain [IPRO05162] (1); LOG family [IPRO31100] (1)                                                                                                                                                                                                                                                                                                                              | scaffold_5_mRNA_3331.1          | -                           | -                               |
| GF0030378 | 1                            | 0                        | 0                            | 0 Disease resistance protein RPS2 (1)                                       |                                                                                                                                                                                                                                                                               | Leucine-rich repeat domain, L domain-like [IPRO32675] (1); Winged helix-turn-helix DNA-binding domain [IPRO11991] (1)                                                                                                                                                                                                                                                                               | scaffold_5_mRNA_3330.1          | -                           | -                               |
| GF0030377 | 1                            | 0                        | 0                            | 0 Importin subunit alpha (1)                                                | oxidoreductase activity [GO:0016491 molecular_function] (1); oxidation-reduction process [GO:0055114 biological_process] (1); binding [GO:0005488 molecular_function] (1); protein binding [GO:0005515 molecular_function] (1)                                                | Atypical Arm repeat [IPRO32413] (1); Armadillo-like helical [IPRO00225] (1); Armadillo-like helical [IPRO11989] (1); FAD/NAD(P)-binding domain [IPRO23753] (1); Armadillo-type fold [IPRO16024] (1)                                                                                                                                                                                                 | scaffold_5_mRNA_3329.1          | -                           | -                               |
| GF0030376 | 1                            | 0                        | 0                            | 0 Hypothetical protein (1)                                                  |                                                                                                                                                                                                                                                                               |                                                                                                                                                                                                                                                                                                                                                                                                     | scaffold_5_mRNA_3327.1          | -                           | -                               |
| GF0030375 | 1                            | 0                        | 0                            | 0 Hypothetical protein (1)                                                  |                                                                                                                                                                                                                                                                               | Retrotransposon gag domain [IPRO05162] (1)                                                                                                                                                                                                                                                                                                                                                          | scaffold_5_mRNA_3326.1          | -                           | -                               |
| GF0030374 | 1                            | 0                        | 0                            | 0 Hypothetical protein (1)                                                  |                                                                                                                                                                                                                                                                               |                                                                                                                                                                                                                                                                                                                                                                                                     | scaffold_5_mRNA_3321.1          | -                           | -                               |
| GF0030373 | 1                            | 0                        | 0                            | 0 Hypothetical protein (1)                                                  |                                                                                                                                                                                                                                                                               |                                                                                                                                                                                                                                                                                                                                                                                                     | scaffold_5_mRNA_3316.1          | -                           | -                               |
| GF0030372 | 1                            | 0                        | 0                            | 0 Hypothetical protein (1)                                                  | ADP binding [GO:0043531 molecular_function] (1); binding [GO:0005488 molecular_function] (1); protein binding [GO:0005515 molecular_function] (1)                                                                                                                             | AAA+ ATPase domain [IPRO03593] (1); NB-ARC [IPRO02182] (1); Armadillo-type fold [IPRO16024] (1); P-loop containing nucleoside triphosphate hydrolase [IPRO27417] (1); Winged helix-turn-helix DNA-binding domain [IPRO11991] (1); Leucine-rich repeat domain, L domain-like [IPRO32675] (1); Atypical Arm repeat [IPRO32413] (1); Armadillo [IPRO00225] (1); Armadillo-like helical [IPRO11989] (1) | scaffold_5_mRNA_3315.1          | -                           | -                               |
| GF0030371 | 1                            | 0                        | 0                            | 0 Hypothetical protein (1)                                                  | oxidation-reduction process [GO:0055114 biological_process] (1); oxidoreductase activity [GO:0016491 molecular_function] (1); carotenoid biosynthetic process [GO:0016117 biological_process] (1); carotene 7,8-desaturase activity [GO:0016719 molecular_function] (1)       | Zeta-carotene desaturase [IPRO14103] (1); FAD/NAD(P)-binding domain [IPRO23753] (1)                                                                                                                                                                                                                                                                                                                 | scaffold_5_mRNA_3311.1          | -                           | -                               |
| GF0030370 | 1                            | 0                        | 0                            | 0 Phosphoprotein phosphatase (1)                                            |                                                                                                                                                                                                                                                                               | Leucine-rich repeat domain, L domain-like [IPRO32675] (1)                                                                                                                                                                                                                                                                                                                                           | scaffold_5_mRNA_3309.1          | -                           | -                               |
| GF0030369 | 1                            | 0                        | 0                            | 0 Hypothetical protein (1)                                                  | intracellular signal transduction [GO:0035556 biological_process] (1)                                                                                                                                                                                                         | DC1 [IPRO04146] (1); Protein kinase C-like, phorbol ester/diacylglycerol-binding domain [IPRO02219] (1); Zinc finger RING/YVE/PHD-type [IPRO13083] (1); Domain of unknown function DUF1985 [IPRO15410] (1)                                                                                                                                                                                          | scaffold_5_mRNA_3294.1          | -                           | -                               |
| GF0030368 | 1                            | 0                        | 0                            | 0 Hydroxycinnamoyl-CoA shikimate/quinamate hydroxycinnamoyl transferase (1) | transferase activity, transferring acyl groups other than amino-acyl groups [GO:0016747 molecular_function] (1)                                                                                                                                                               | Transferase [IPRO03480] (1)                                                                                                                                                                                                                                                                                                                                                                         | scaffold_5_mRNA_3291.1          | -                           | -                               |
| GF0030367 | 1                            | 0                        | 0                            | 0 Putative peroxide reductase-like (1)                                      |                                                                                                                                                                                                                                                                               | NADP-dependent oxidoreductase domain [IPRO23210] (1)                                                                                                                                                                                                                                                                                                                                                | scaffold_5_mRNA_3277.1          | -                           | -                               |
| GF0030366 | 1                            | 0                        | 0                            | 0 Aldo-keto reductase family oxidoreductase (1)                             |                                                                                                                                                                                                                                                                               | NADP-dependent oxidoreductase domain [IPRO23210] (1)                                                                                                                                                                                                                                                                                                                                                | scaffold_5_mRNA_3273.1          | -                           | -                               |
| GF0030365 | 1                            | 0                        | 0                            | 0 Calmodulin (1)                                                            | calcium ion binding [GO:0005509 molecular_function] (1)                                                                                                                                                                                                                       | EF-Hand 1, calcium-binding site [IPRO18247] (1); EF-hand domain [IPRO02048] (1); EF-hand domain pair [IPRO11992] (1)                                                                                                                                                                                                                                                                                | scaffold_5_mRNA_3267.1          | -                           | -                               |
| GF0030364 | 1                            | 0                        | 0                            | 0 Hypothetical protein (1)                                                  |                                                                                                                                                                                                                                                                               |                                                                                                                                                                                                                                                                                                                                                                                                     | scaffold_5_mRNA_3261.1          | -                           | -                               |
| GF0030363 | 1                            | 0                        | 0                            | 0 Hypothetical protein (1)                                                  | nucleic acid binding [GO:0003676 molecular_function] (1)                                                                                                                                                                                                                      | Ribonuclease H-like domain [IPRO12337] (1)                                                                                                                                                                                                                                                                                                                                                          | scaffold_5_mRNA_3252.1          | -                           | -                               |
| GF0030362 | 1                            | 0                        | 0                            | 0 Hypothetical protein (1)                                                  |                                                                                                                                                                                                                                                                               |                                                                                                                                                                                                                                                                                                                                                                                                     | scaffold_5_mRNA_3251.1          | -                           | -                               |
| GF0030361 | 1                            | 0                        | 0                            | 0 LRR and NB-ARC domain disease resistance protein (1)                      | ADP binding [GO:0043531 molecular_function] (1)                                                                                                                                                                                                                               | Winged helix-turn-helix DNA-binding domain [IPRO11991] (1); Leucine-rich repeat domain, L domain-like [IPRO32675] (1); NB-ARC [IPRO02182] (1); P-loop containing nucleoside triphosphate hydrolase [IPRO27417] (1)                                                                                                                                                                                  | scaffold_5_mRNA_325.1           | -                           | -                               |
| GF0030360 | 1                            | 0                        | 0                            | 0 Hypothetical protein (1)                                                  | oxidation-reduction process [GO:0055114 biological_process] (1); oxidoreductase activity [GO:0016491 molecular_function] (1); double-stranded DNA binding [GO:0005690 molecular_function] (1); regulation of transcription, DNA-templated [GO:0006355 biological_process] (1) | Transcription termination factor, mitochondrial/chloroplast [IPRO03690] (1); Isopenicillin N synthase-like [IPRO27443] (1); Non-haem dioxygenase N-terminal domain [IPRO26992] (1); Ooglutamate/iron-dependent dioxygenase [IPRO05123] (1)                                                                                                                                                          | scaffold_5_mRNA_3242.1          | -                           | -                               |
| GF0030359 | 1                            | 0                        | 0                            | 0 Ras-like GTP-binding protein YPT1 (1)                                     | GTP binding [GO:0005525 molecular_function] (1); GTPase activity [GO:0003924 molecular_function] (1)                                                                                                                                                                          | Small GTP-binding protein domain [IPRO05225] (1); P-loop containing nucleoside triphosphate hydrolase [IPRO27417] (1); Small GTPase superfamily [IPRO01806] (1)                                                                                                                                                                                                                                     | scaffold_5_mRNA_324.1           | -                           | -                               |
| GF0030358 | 1                            | 0                        | 0                            | 0 Hypothetical protein (1)                                                  |                                                                                                                                                                                                                                                                               |                                                                                                                                                                                                                                                                                                                                                                                                     | scaffold_5_mRNA_3239.1          | -                           | -                               |
| GF0030357 | 1                            | 0                        | 0                            | 0 Hypothetical protein (1)                                                  | nucleic acid binding [GO:0003676 molecular_function] (1)                                                                                                                                                                                                                      | Ribonuclease H-like domain [IPRO12337] (1)                                                                                                                                                                                                                                                                                                                                                          | scaffold_5_mRNA_3234.1          | -                           | -                               |
| GF0030356 | 1                            | 0                        | 0                            | 0 Hypothetical protein (1)                                                  | oxidoreductase activity [GO:0016491 molecular_function] (1); oxidation-reduction process [GO:0055114 biological_process] (1)                                                                                                                                                  | Ooglutamate/iron-dependent dioxygenase [IPRO05123] (1); Isopenicillin N synthase-like [IPRO27443] (1); Non-haem dioxygenase N-terminal domain [IPRO26992] (1)                                                                                                                                                                                                                                       | scaffold_5_mRNA_3232.1          | -                           | -                               |
| GF0030355 | 1                            | 0                        | 0                            | 0 Hypothetical protein (1)                                                  | protein binding [GO:0005515 molecular_function] (1)                                                                                                                                                                                                                           | Tetrapeptide-like helical domain [IPRO11990] (1); Pentapeptide repeat [IPRO02885] (1)                                                                                                                                                                                                                                                                                                               | scaffold_5_mRNA_3231.1          | -                           | -                               |
| GF0030354 | 1                            | 0                        | 0                            | 0 Ras-like GTP-binding protein YPT1 (1)                                     | GTPase activity [GO:0003924 molecular_function] (1); GTP binding [GO:0005525 molecular_function] (1)                                                                                                                                                                          | Small GTPase superfamily [IPRO01806] (1); P-loop containing nucleoside triphosphate hydrolase [IPRO27417] (1)                                                                                                                                                                                                                                                                                       | scaffold_5_mRNA_322.1           | -                           | -                               |
| GF0030353 | 1                            | 0                        | 0                            | 0 LRR receptor-like serine/threonine-protein kinase GSO1 (1)                | protein binding [GO:0005515 molecular_function] (1)                                                                                                                                                                                                                           | Leucine-rich repeat-containing N-terminal, plant-type [IPRO12101] (1); Leucine-rich repeat domain, L domain-like [IPRO32675] (1); Leucine-rich repeat, typical subtype [IPRO03591] (1)                                                                                                                                                                                                              | scaffold_5_mRNA_3217.1          | -                           | -                               |
| GF0030352 | 1                            | 0                        | 0                            | 0 Hypothetical protein (1)                                                  | ADP binding [GO:0043531 molecular_function] (1)                                                                                                                                                                                                                               | P-loop containing nucleoside triphosphate hydrolase [IPRO27417] (1); NB-ARC [IPRO02182] (1); High mobility group box domain [IPRO09071] (1); Leucine-rich repeat domain, L domain-like [IPRO32675] (1)                                                                                                                                                                                              | scaffold_5_mRNA_321.1           | -                           | -                               |



| ID        | Num. in <i>C. caryophyllata</i> | Num. in <i>C. uchiha</i> | Num. in <i>P. trifoliata</i> | Note                                                                      | GO                                                                                                                                                                                                                                                           | InterPro                                                                                                                                                                                                                    | Members in <i>C. caryophyllata</i> | Members in <i>C. uchiha</i> | Members in <i>P. trifoliata</i> |
|-----------|---------------------------------|--------------------------|------------------------------|---------------------------------------------------------------------------|--------------------------------------------------------------------------------------------------------------------------------------------------------------------------------------------------------------------------------------------------------------|-----------------------------------------------------------------------------------------------------------------------------------------------------------------------------------------------------------------------------|------------------------------------|-----------------------------|---------------------------------|
| GF0030351 | 1                               | 0                        | 0                            | 0 Hypothetical protein (1)                                                |                                                                                                                                                                                                                                                              |                                                                                                                                                                                                                             | scaffold_5_mRNA_3204.1             | -                           | -                               |
| GF0030350 | 1                               | 0                        | 0                            | 0 Hypothetical protein (1)                                                |                                                                                                                                                                                                                                                              |                                                                                                                                                                                                                             | scaffold_5_mRNA_3202.1             | -                           | -                               |
| GF0030349 | 1                               | 0                        | 0                            | 0 Hypothetical protein (1)                                                |                                                                                                                                                                                                                                                              |                                                                                                                                                                                                                             | scaffold_5_mRNA_3200.1             | -                           | -                               |
| GF0030348 | 1                               | 0                        | 0                            | 0 Hypothetical protein (1)                                                | integral component of membrane [GO:0016021 cellular_component] (1); transmembrane transport [GO:0055085 biological_process] (1)                                                                                                                              | Membrane transport protein [IPR004776] (1)                                                                                                                                                                                  | scaffold_5_mRNA_320.1              | -                           | -                               |
| GF0030347 | 1                               | 0                        | 0                            | 0 Hypothetical protein (1)                                                |                                                                                                                                                                                                                                                              |                                                                                                                                                                                                                             | scaffold_5_mRNA_3198.1             | -                           | -                               |
| GF0030346 | 1                               | 0                        | 0                            | 0 Hypothetical protein (1)                                                |                                                                                                                                                                                                                                                              |                                                                                                                                                                                                                             | scaffold_5_mRNA_3196.1             | -                           | -                               |
| GF0030345 | 1                               | 0                        | 0                            | 0 Putative TNP2 like transposable element (1)                             |                                                                                                                                                                                                                                                              | Domain of unknown function DUF4218 [IPR25452] (1); Domain of unknown function DUF4216 [IPR025312] (1)                                                                                                                       | scaffold_5_mRNA_3195.1             | -                           | -                               |
| GF0030344 | 1                               | 0                        | 0                            | 0 Hydroxycinnamoyl-CoA shikimate/quinate hydroxycinnamoyl transferase (1) | transferase activity, transferring acyl groups other than amino-acyl groups [GO:0016747 molecular_function] (1)                                                                                                                                              | Transferase [IPR003480] (1)                                                                                                                                                                                                 | scaffold_5_mRNA_3191.1             | -                           | -                               |
| GF0030343 | 1                               | 0                        | 0                            | 0 Hypothetical protein (1)                                                |                                                                                                                                                                                                                                                              |                                                                                                                                                                                                                             | scaffold_5_mRNA_3189.1             | -                           | -                               |
| GF0030342 | 1                               | 0                        | 0                            | 0 Ras-like GTP-binding protein YPT1 (1)                                   | GTPase activity [GO:0003924 molecular_function] (1); GTP binding [GO:0005525 molecular_function] (1)                                                                                                                                                         | P-loop containing nucleoside triphosphate hydrolase [IPR027417] (1); Small GTPase superfamily [IPR001806] (1)                                                                                                               | scaffold_5_mRNA_318.1              | -                           | -                               |
| GF0030341 | 1                               | 0                        | 0                            | 0 Hypothetical protein (1)                                                |                                                                                                                                                                                                                                                              | Retrotransposon gag domain [IPR005162] (1)                                                                                                                                                                                  | scaffold_5_mRNA_3174.1             | -                           | -                               |
| GF0030340 | 1                               | 0                        | 0                            | 0 Hypothetical protein (1)                                                |                                                                                                                                                                                                                                                              |                                                                                                                                                                                                                             | scaffold_5_mRNA_3173.1             | -                           | -                               |
| GF0030339 | 1                               | 0                        | 0                            | 0 LRR receptor-like serine/threonine-protein kinase GSO1 (1)              | protein binding [GO:0005515 molecular_function] (1)                                                                                                                                                                                                          | Leucine-rich repeat-containing N-terminal, plant-type [IPR013210] (1); Leucine-rich repeat [IPR001611] (1); Leucine-rich repeat, typical subtype [IPR003591] (1); Leucine-rich repeat domain, L domain-like [IPR032675] (1) | scaffold_5_mRNA_3171.1             | -                           | -                               |
| GF0030338 | 1                               | 0                        | 0                            | 0 Hypothetical protein (1)                                                | nucleic acid binding [GO:0003676 molecular_function] (1)                                                                                                                                                                                                     | Ribonuclease H-like domain [IPR012337] (1)                                                                                                                                                                                  | scaffold_5_mRNA_317.1              | -                           | -                               |
| GF0030337 | 1                               | 0                        | 0                            | 0 Hypothetical protein (1)                                                |                                                                                                                                                                                                                                                              |                                                                                                                                                                                                                             | scaffold_5_mRNA_3167.1             | -                           | -                               |
| GF0030336 | 1                               | 0                        | 0                            | 0 Hypothetical protein (1)                                                | mitotic DNA replication checkpoint [GO:0033314 biological_process] (1); DNA replication [GO:0006260 biological_process] (1); response to ionizing radiation [GO:0010212 biological_process] (1); nucleus [GO:0005634 cellular_component] (1)                 | Treslin [IPR026153] (1)                                                                                                                                                                                                     | scaffold_5_mRNA_3166.1             | -                           | -                               |
| GF0030335 | 1                               | 0                        | 0                            | 0 SH3 domain-containing protein 2 (1)                                     |                                                                                                                                                                                                                                                              | Arfapin homology (AH) domain/BAR domain [IPR027267] (1)                                                                                                                                                                     | scaffold_5_mRNA_3165.1             | -                           | -                               |
| GF0030334 | 1                               | 0                        | 0                            | 0 LRR receptor-like serine/threonine-protein kinase GSO1 (1)              | protein binding [GO:0005515 molecular_function] (1)                                                                                                                                                                                                          | Leucine-rich repeat domain, L domain-like [IPR032675] (1); Leucine-rich repeat, typical subtype [IPR003591] (1); Leucine-rich repeat [IPR001611] (1)                                                                        | scaffold_5_mRNA_3164.1             | -                           | -                               |
| GF0030333 | 1                               | 0                        | 0                            | 0 LRR receptor-like kinase family protein (1)                             | protein binding [GO:0005515 molecular_function] (1)                                                                                                                                                                                                          | Leucine-rich repeat-containing N-terminal, plant-type [IPR013210] (1); Leucine-rich repeat, typical subtype [IPR003591] (1); Leucine-rich repeat domain, L domain-like [IPR032675] (1)                                      | scaffold_5_mRNA_3162.1             | -                           | -                               |
| GF0030332 | 1                               | 0                        | 0                            | 0 22.7 kDa class IV heat shock protein (1)                                |                                                                                                                                                                                                                                                              | Small heat shock protein HSP20 domain [IPR01107] (1); Alpha crystallin/Hsp20 domain [IPR02068] (1); HSP20-like chaperone [IPR008978] (1)                                                                                    | scaffold_5_mRNA_316.1              | -                           | -                               |
| GF0030331 | 1                               | 0                        | 0                            | 0 Hypothetical protein (1)                                                |                                                                                                                                                                                                                                                              | Transposase-associated domain [IPR029480] (1)                                                                                                                                                                               | scaffold_5_mRNA_3159.1             | -                           | -                               |
| GF0030330 | 1                               | 0                        | 0                            | 0 LRR receptor-like serine/threonine-protein kinase GSO1 (1)              | protein binding [GO:0005515 molecular_function] (1)                                                                                                                                                                                                          | Leucine-rich repeat, typical subtype [IPR003591] (1); Leucine-rich repeat domain, L domain-like [IPR032675] (1); Leucine-rich repeat-containing N-terminal, plant-type [IPR013210] (1); Leucine-rich repeat [IPR001611] (1) | scaffold_5_mRNA_3158.1             | -                           | -                               |
| GF0030329 | 1                               | 0                        | 0                            | 0 SH3 domain-containing protein 2 (1)                                     | protein binding [GO:0005515 molecular_function] (1)                                                                                                                                                                                                          | SH3 domain [IPR001452] (1); Arfapin homology (AH) domain/BAR domain [IPR027267] (1)                                                                                                                                         | scaffold_5_mRNA_3155.1             | -                           | -                               |
| GF0030328 | 1                               | 0                        | 0                            | 0 Zinc knuckle family protein (1)                                         | nucleic acid binding [GO:0003676 molecular_function] (1); zinc ion binding [GO:0008270 molecular_function] (1)                                                                                                                                               | Zinc finger, CCHC-type [IPR001878] (1)                                                                                                                                                                                      | scaffold_5_mRNA_3152.1             | -                           | -                               |
| GF0030327 | 1                               | 0                        | 0                            | 0 SH3 domain-containing protein 2 (1)                                     | protein binding [GO:0005515 molecular_function] (1)                                                                                                                                                                                                          | SH3 domain [IPR001452] (1); Arfapin homology (AH) domain/BAR domain [IPR027267] (1)                                                                                                                                         | scaffold_5_mRNA_3150.1             | -                           | -                               |
| GF0030326 | 1                               | 0                        | 0                            | 0 Hypothetical protein (1)                                                | transmembrane transport [GO:0055085 biological_process] (1); membrane [GO:0016020 cellular_component] (1); transport [GO:0006810 biological_process] (1)                                                                                                     | Amino acid permease/ SLC12A domain [IPR004841] (1)                                                                                                                                                                          | scaffold_5_mRNA_3147.1             | -                           | -                               |
| GF0030325 | 1                               | 0                        | 0                            | 0 Hypothetical protein (1)                                                | polysamine binding [GO:0019808 molecular_function] (1); polysamine transport [GO:0015846 biological_process] (1); periplasmic space [GO:0042597 cellular_component] (1)                                                                                      | Bacterial periplasmic space/periplasmic-binding protein [IPR001188] (1)                                                                                                                                                     | scaffold_5_mRNA_3145.1             | -                           | -                               |
| GF0030324 | 1                               | 0                        | 0                            | 0 Hypothetical protein (1)                                                |                                                                                                                                                                                                                                                              |                                                                                                                                                                                                                             | scaffold_5_mRNA_3144.1             | -                           | -                               |
| GF0030323 | 1                               | 0                        | 0                            | 0 SH3 domain-containing protein 2 (1)                                     | protein binding [GO:0005515 molecular_function] (1)                                                                                                                                                                                                          | Arfapin homology (AH) domain/BAR domain [IPR027267] (1); SH3 domain [IPR001452] (1)                                                                                                                                         | scaffold_5_mRNA_3143.1             | -                           | -                               |
| GF0030322 | 1                               | 0                        | 0                            | 0 Hypothetical protein (1)                                                |                                                                                                                                                                                                                                                              |                                                                                                                                                                                                                             | scaffold_5_mRNA_3141.1             | -                           | -                               |
| GF0030321 | 1                               | 0                        | 0                            | 0 Hypothetical protein (1)                                                | DNA binding [GO:0003677 molecular_function] (1)                                                                                                                                                                                                              | hAT-like transposase, RNase-H fold [IPR025525] (1)                                                                                                                                                                          | scaffold_5_mRNA_3140.1             | -                           | -                               |
| GF0030320 | 1                               | 0                        | 0                            | 0 Amino acid permease family protein (1)                                  | amino acid transmembrane transporter activity [GO:0015171 molecular_function] (1); membrane [GO:0016020 cellular_component] (1); amino acid transmembrane transport [GO:0003333 biological_process] (1)                                                      | Amino acid/polyamine transporter 1 [IPR002293] (1)                                                                                                                                                                          | scaffold_5_mRNA_3139.1             | -                           | -                               |
| GF0030319 | 1                               | 0                        | 0                            | 0 Hypothetical protein (1)                                                | protein binding [GO:0005515 molecular_function] (1)                                                                                                                                                                                                          | SH3 domain [IPR001452] (1)                                                                                                                                                                                                  | scaffold_5_mRNA_3138.1             | -                           | -                               |
| GF0030318 | 1                               | 0                        | 0                            | 0 LRR receptor-like serine/threonine-protein kinase GSO1 (1)              | protein binding [GO:0005515 molecular_function] (1)                                                                                                                                                                                                          | Leucine-rich repeat [IPR001611] (1); Leucine-rich repeat domain, L domain-like [IPR032675] (1); Leucine-rich repeat, typical subtype [IPR003591] (1)                                                                        | scaffold_5_mRNA_3137.1             | -                           | -                               |
| GF0030317 | 1                               | 0                        | 0                            | 0 Amino acid permease family protein (1)                                  | amino acid transmembrane transport [GO:0003333 biological_process] (1); membrane [GO:0016020 cellular_component] (1); protein binding [GO:0005515 molecular_function] (1); amino acid transmembrane transporter activity [GO:0015171 molecular_function] (1) | SH3 domain [IPR001452] (1); Amino acid/polyamine transporter 1 [IPR002293] (1)                                                                                                                                              | scaffold_5_mRNA_3135.1             | -                           | -                               |
| GF0030316 | 1                               | 0                        | 0                            | 0 LRR receptor-like kinase family protein (1)                             | protein binding [GO:0005515 molecular_function] (1)                                                                                                                                                                                                          | Leucine-rich repeat [IPR001611] (1); Leucine-rich repeat domain, L domain-like [IPR032675] (1)                                                                                                                              | scaffold_5_mRNA_3134.1             | -                           | -                               |
| GF0030315 | 1                               | 0                        | 0                            | 0 Retrotransposon protein, putative, unclassified (1)                     |                                                                                                                                                                                                                                                              |                                                                                                                                                                                                                             | scaffold_5_mRNA_3132.1             | -                           | -                               |
| GF0030314 | 1                               | 0                        | 0                            | 0 Hypothetical protein (1)                                                |                                                                                                                                                                                                                                                              |                                                                                                                                                                                                                             | scaffold_5_mRNA_313.1              | -                           | -                               |
| GF0030313 | 1                               | 0                        | 0                            | 0 Hypothetical protein (1)                                                |                                                                                                                                                                                                                                                              |                                                                                                                                                                                                                             | scaffold_5_mRNA_3129.1             | -                           | -                               |
| GF0030312 | 1                               | 0                        | 0                            | 0 Hypothetical protein (1)                                                |                                                                                                                                                                                                                                                              |                                                                                                                                                                                                                             | scaffold_5_mRNA_3128.1             | -                           | -                               |
| GF0030311 | 1                               | 0                        | 0                            | 0 Hypothetical protein (1)                                                |                                                                                                                                                                                                                                                              |                                                                                                                                                                                                                             | scaffold_5_mRNA_3126.1             | -                           | -                               |
| GF0030310 | 1                               | 0                        | 0                            | 0 Hypothetical protein (1)                                                |                                                                                                                                                                                                                                                              |                                                                                                                                                                                                                             | scaffold_5_mRNA_3125.1             | -                           | -                               |
| GF0030309 | 1                               | 0                        | 0                            | 0 Cytokinin riboside 5'-monophosphate phosphoribohydrolase (1)            |                                                                                                                                                                                                                                                              | LOG family [IPR031100] (1)                                                                                                                                                                                                  | scaffold_5_mRNA_3124.1             | -                           | -                               |
| GF0030308 | 1                               | 0                        | 0                            | 0 Hypothetical protein (1)                                                |                                                                                                                                                                                                                                                              |                                                                                                                                                                                                                             | scaffold_5_mRNA_3121.1             | -                           | -                               |
| GF0030307 | 1                               | 0                        | 0                            | 0 Hypothetical protein (1)                                                | membrane [GO:0016020 cellular_component] (1); amino acid transmembrane transport [GO:0003333 biological_process] (1); amino acid transmembrane transporter activity [GO:0015171 molecular_function] (1)                                                      | Amino acid/polyamine transporter 1 [IPR002293] (1)                                                                                                                                                                          | scaffold_5_mRNA_3120.1             | -                           | -                               |
| GF0030306 | 1                               | 0                        | 0                            | 0 Hypothetical protein (1)                                                | protein binding [GO:0005515 molecular_function] (1)                                                                                                                                                                                                          | Arfapin homology (AH) domain/BAR domain [IPR027267] (1); SH3 domain [IPR001452] (1)                                                                                                                                         | scaffold_5_mRNA_3119.1             | -                           | -                               |
| GF0030305 | 1                               | 0                        | 0                            | 0 Hypothetical protein (1)                                                | protein binding [GO:0005515 molecular_function] (1)                                                                                                                                                                                                          | Leucine-rich repeat domain, L domain-like [IPR032675] (1); Leucine-rich repeat [IPR001611] (1)                                                                                                                              | scaffold_5_mRNA_3118.1             | -                           | -                               |
| GF0030304 | 1                               | 0                        | 0                            | 0 Hypothetical protein (1)                                                |                                                                                                                                                                                                                                                              |                                                                                                                                                                                                                             | scaffold_5_mRNA_3117.1             | -                           | -                               |
| GF0030303 | 1                               | 0                        | 0                            | 0 Hypothetical protein (1)                                                |                                                                                                                                                                                                                                                              |                                                                                                                                                                                                                             | scaffold_5_mRNA_3116.1             | -                           | -                               |
| GF0030302 | 1                               | 0                        | 0                            | 0 SH3 domain-containing protein 2 (1)                                     | protein binding [GO:0005515 molecular_function] (1)                                                                                                                                                                                                          | SH3 domain [IPR001452] (1); Arfapin homology (AH) domain/BAR domain [IPR027267] (1)                                                                                                                                         | scaffold_5_mRNA_3115.1             | -                           | -                               |
| GF0030301 | 1                               | 0                        | 0                            | 0 Hypothetical protein (1)                                                | protein binding [GO:0005515 molecular_function] (1)                                                                                                                                                                                                          | Leucine-rich repeat [IPR001611] (1); Leucine-rich repeat, typical subtype [IPR003591] (1); Leucine-rich repeat domain, L domain-like [IPR032675] (1)                                                                        | scaffold_5_mRNA_3114.1             | -                           | -                               |
| GF0030300 | 1                               | 0                        | 0                            | 0 Hypothetical protein (1)                                                | protein binding [GO:0005515 molecular_function] (1)                                                                                                                                                                                                          | Leucine-rich repeat [IPR001611] (1); Leucine-rich repeat domain, L domain-like [IPR032675] (1)                                                                                                                              | scaffold_5_mRNA_3113.1             | -                           | -                               |

| ID        | Num. in <i>C. clementinae</i> | Num. in <i>C. uchiha</i> | Num. in <i>P. trifoliata</i> | Note                                                                  | GO                                                                                                                                                                                                                                                                                                                | InterPro                                                                                                                                                                                                                    | Members in <i>C. clementinae</i> | Members in <i>C. uchiha</i> | Members in <i>P. trifoliata</i> |
|-----------|-------------------------------|--------------------------|------------------------------|-----------------------------------------------------------------------|-------------------------------------------------------------------------------------------------------------------------------------------------------------------------------------------------------------------------------------------------------------------------------------------------------------------|-----------------------------------------------------------------------------------------------------------------------------------------------------------------------------------------------------------------------------|----------------------------------|-----------------------------|---------------------------------|
| GF0030299 | 1                             | 0                        | 0                            | 0 Hypothetical protein (1)                                            | polyamine transport [GO:0015846 biological_process] (1); periplasmic space [GO:004297 cellular_component] (1); polyamine binding [GO:0019808 molecular_function] (1)                                                                                                                                              | Bacterial periplasmic spermidine/putrescine-binding protein [IPR011611] (1); [IPR001188] (1)                                                                                                                                | scaffold_5_mRNA_3112.1           | -                           | -                               |
| GF0030298 | 1                             | 0                        | 0                            | 0 Hypothetical protein (1)                                            | nucleic acid binding [GO:0003676 molecular_function] (1)                                                                                                                                                                                                                                                          | Ribonuclease H-like domain [IPR012337] (1)                                                                                                                                                                                  | scaffold_5_mRNA_3110.1           | -                           | -                               |
| GF0030297 | 1                             | 0                        | 0                            | 0 Hypothetical protein (1)                                            | nucleic acid binding [GO:0003676 molecular_function] (1)                                                                                                                                                                                                                                                          | Ribonuclease H-like domain [IPR012337] (1)                                                                                                                                                                                  | scaffold_5_mRNA_311.1            | -                           | -                               |
| GF0030296 | 1                             | 0                        | 0                            | 0 LRR receptor-like serine/threonine-protein kinase GSO1 (1)          | protein binding [GO:0005515 molecular_function] (1)                                                                                                                                                                                                                                                               | Leucine-rich repeat-containing N-terminal, plant-type [IPR013210] (1); Leucine-rich repeat [IPR001611] (1); Leucine-rich repeat domain, L domain-like [IPR032675] (1); Leucine-rich repeat, typical subtype [IPR003591] (1) | scaffold_5_mRNA_3109.1           | -                           | -                               |
| GF0030295 | 1                             | 0                        | 0                            | 0 Hypothetical protein (1)                                            |                                                                                                                                                                                                                                                                                                                   |                                                                                                                                                                                                                             | scaffold_5_mRNA_3108.1           | -                           | -                               |
| GF0030294 | 1                             | 0                        | 0                            | 0 Hypothetical protein (1)                                            |                                                                                                                                                                                                                                                                                                                   |                                                                                                                                                                                                                             | scaffold_5_mRNA_3105.1           | -                           | -                               |
| GF0030293 | 1                             | 0                        | 0                            | 0 Hypothetical protein (1)                                            |                                                                                                                                                                                                                                                                                                                   |                                                                                                                                                                                                                             | scaffold_5_mRNA_3104.1           | -                           | -                               |
| GF0030292 | 1                             | 0                        | 0                            | 0 Hypothetical protein (1)                                            |                                                                                                                                                                                                                                                                                                                   |                                                                                                                                                                                                                             | scaffold_5_mRNA_3103.1           | -                           | -                               |
| GF0030291 | 1                             | 0                        | 0                            | 0 Hypothetical protein (1)                                            | DNA binding [GO:0003677 molecular_function] (1); nucleic acid binding [GO:0003676 molecular_function] (1)                                                                                                                                                                                                         | Zinc finger, BED-type [IPR003656] (1); Zinc finger C2H2-type [IPR013087] (1)                                                                                                                                                | scaffold_5_mRNA_3102.1           | -                           | -                               |
| GF0030290 | 1                             | 0                        | 0                            | 0 Hypothetical protein (1)                                            |                                                                                                                                                                                                                                                                                                                   |                                                                                                                                                                                                                             | scaffold_5_mRNA_3101.1           | -                           | -                               |
| GF0030289 | 1                             | 0                        | 0                            | 0 Disease resistance family protein/ LRR family protein, putative (1) | protein binding [GO:0005515 molecular_function] (1)                                                                                                                                                                                                                                                               | Leucine-rich repeat-containing N-terminal, plant-type [IPR013210] (1); Leucine-rich repeat [IPR001611] (1); Leucine-rich repeat domain, L domain-like [IPR032675] (1); Leucine-rich repeat, typical subtype [IPR003591] (1) | scaffold_5_mRNA_3098.1           | -                           | -                               |
| GF0030288 | 1                             | 0                        | 0                            | 0 SH3 domain-containing protein 2 (1)                                 | protein binding [GO:0005515 molecular_function] (1)                                                                                                                                                                                                                                                               | Arfapin homology (AH) domain/BAR domain [IPR027267] (1); SH3 domain [IPR01452] (1)                                                                                                                                          | scaffold_5_mRNA_3096.1           | -                           | -                               |
| GF0030287 | 1                             | 0                        | 0                            | 0 LRR receptor-like serine/threonine-protein kinase GSO1 (1)          | polyamine binding [GO:0019808 molecular_function] (1); polyamine transport [GO:0015846 biological_process] (1); periplasmic space [GO:004297 cellular_component] (1); protein binding [GO:0005515 molecular_function] (1)                                                                                         | spermidine/putrescine-binding protein [IPR011611] (1); Leucine-rich repeat domain, L domain-like [IPR032675] (1); Leucine-rich repeat, typical subtype [IPR003591] (1)                                                      | scaffold_5_mRNA_3095.1           | -                           | -                               |
| GF0030286 | 1                             | 0                        | 0                            | 0 Hypothetical protein (1)                                            |                                                                                                                                                                                                                                                                                                                   | Histone deacetylase domain [IPR023801] (1); Histone deacetylase superfamily [IPR000286] (1)                                                                                                                                 | scaffold_5_mRNA_3087.1           | -                           | -                               |
| GF0030285 | 1                             | 0                        | 0                            | 0 Hypothetical protein (1)                                            |                                                                                                                                                                                                                                                                                                                   |                                                                                                                                                                                                                             | scaffold_5_mRNA_3086.1           | -                           | -                               |
| GF0030284 | 1                             | 0                        | 0                            | 0 Hypothetical protein (1)                                            |                                                                                                                                                                                                                                                                                                                   |                                                                                                                                                                                                                             | scaffold_5_mRNA_3085.1           | -                           | -                               |
| GF0030283 | 1                             | 0                        | 0                            | 0 Hypothetical protein (1)                                            |                                                                                                                                                                                                                                                                                                                   |                                                                                                                                                                                                                             | scaffold_5_mRNA_3084.1           | -                           | -                               |
| GF0030282 | 1                             | 0                        | 0                            | 0 Hypothetical protein (1)                                            |                                                                                                                                                                                                                                                                                                                   |                                                                                                                                                                                                                             | scaffold_5_mRNA_3082.1           | -                           | -                               |
| GF0030281 | 1                             | 0                        | 0                            | 0 Hypothetical protein (1)                                            | nucleic acid binding [GO:0003676 molecular_function] (1); zinc ion binding [GO:0008270 molecular_function] (1)                                                                                                                                                                                                    | Zinc finger, CCHC-type [IPR001878] (1)                                                                                                                                                                                      | scaffold_5_mRNA_3081.1           | -                           | -                               |
| GF0030280 | 1                             | 0                        | 0                            | 0 Hypothetical protein (1)                                            |                                                                                                                                                                                                                                                                                                                   |                                                                                                                                                                                                                             | scaffold_5_mRNA_3079.1           | -                           | -                               |
| GF0030279 | 1                             | 0                        | 0                            | 0 Receptor like protein 21 (1)                                        | protein binding [GO:0005515 molecular_function] (1)                                                                                                                                                                                                                                                               | Leucine-rich repeat domain, L domain-like [IPR032675] (1); Leucine-rich repeat-containing N-terminal, plant-type [IPR013210] (1); Leucine-rich repeat [IPR001611] (1)                                                       | scaffold_5_mRNA_3073.1           | -                           | -                               |
| GF0030278 | 1                             | 0                        | 0                            | 0 Hypothetical protein (1)                                            |                                                                                                                                                                                                                                                                                                                   |                                                                                                                                                                                                                             | scaffold_5_mRNA_3072.1           | -                           | -                               |
| GF0030277 | 1                             | 0                        | 0                            | 0 Hypothetical protein (1)                                            |                                                                                                                                                                                                                                                                                                                   |                                                                                                                                                                                                                             | scaffold_5_mRNA_3071.1           | -                           | -                               |
| GF0030276 | 1                             | 0                        | 0                            | 0 Hypothetical protein (1)                                            | nucleic acid binding [GO:0003676 molecular_function] (1)                                                                                                                                                                                                                                                          | Ribonuclease H-like domain [IPR012337] (1)                                                                                                                                                                                  | scaffold_5_mRNA_3062.1           | -                           | -                               |
| GF0030275 | 1                             | 0                        | 0                            | 0 Hypothetical protein (1)                                            |                                                                                                                                                                                                                                                                                                                   |                                                                                                                                                                                                                             | scaffold_5_mRNA_3058.1           | -                           | -                               |
| GF0030274 | 1                             | 0                        | 0                            | 0 Hypothetical protein (1)                                            |                                                                                                                                                                                                                                                                                                                   |                                                                                                                                                                                                                             | scaffold_5_mRNA_3046.1           | -                           | -                               |
| GF0030273 | 1                             | 0                        | 0                            | 0 Hypothetical protein (1)                                            |                                                                                                                                                                                                                                                                                                                   |                                                                                                                                                                                                                             | scaffold_5_mRNA_3044.1           | -                           | -                               |
| GF0030272 | 1                             | 0                        | 0                            | 0 Hypothetical protein (1)                                            |                                                                                                                                                                                                                                                                                                                   |                                                                                                                                                                                                                             | scaffold_5_mRNA_3043.1           | -                           | -                               |
| GF0030271 | 1                             | 0                        | 0                            | 0 Cytokinin riboside 5'-monophosphate phosphoribohydrolase (1)        |                                                                                                                                                                                                                                                                                                                   |                                                                                                                                                                                                                             | scaffold_5_mRNA_3042.1           | -                           | -                               |
| GF0030270 | 1                             | 0                        | 0                            | 0 Hypothetical protein (1)                                            | nucleus [GO:0005634 cellular_component] (1)                                                                                                                                                                                                                                                                       | Retrosposon gag domain [IPR005162] (1); BUD31/G10-related, conserved site [IPR018230] (1); G10 protein [IPR001748] (1)                                                                                                      | scaffold_5_mRNA_3040.1           | -                           | -                               |
| GF0030269 | 1                             | 0                        | 0                            | 0 Ubiquitin carboxyl-terminal hydrolase 12 (1)                        | protein binding [GO:0005515 molecular_function] (1)                                                                                                                                                                                                                                                               | MATH/TRAF domain [IPR002083] (1); TRAF-like [IPR008974] (1)                                                                                                                                                                 | scaffold_5_mRNA_3036.1           | -                           | -                               |
| GF0030268 | 1                             | 0                        | 0                            | 0 Hypothetical protein (1)                                            | protein binding [GO:0005515 molecular_function] (1); nucleic acid binding [GO:0003676 molecular_function] (1)                                                                                                                                                                                                     | MATH/TRAF domain [IPR002083] (1); Ribonuclease H-like domain [IPR012337] (1)                                                                                                                                                | scaffold_5_mRNA_3034.1           | -                           | -                               |
| GF0030267 | 1                             | 0                        | 0                            | 0 Hypothetical protein (1)                                            | protein binding [GO:0005515 molecular_function] (1)                                                                                                                                                                                                                                                               | MATH/TRAF domain [IPR002083] (1); TRAF-like [IPR008974] (1); Arabidopsis retrotransposon Orf1 [IPR004312] (1)                                                                                                               | scaffold_5_mRNA_3033.1           | -                           | -                               |
| GF0030266 | 1                             | 0                        | 0                            | 0 Hypothetical protein (1)                                            |                                                                                                                                                                                                                                                                                                                   | MULE transposase domain [IPR018289] (1); TRAF-like [IPR008974] (1); MATH/TRAF domain [IPR002083] (1); FAR1 DNA binding domain [IPR004330] (1); FHY3/FAR1 family [IPR031052] (1)                                             | scaffold_5_mRNA_3032.1           | -                           | -                               |
| GF0030265 | 1                             | 0                        | 0                            | 0 Hypothetical protein (1)                                            | regulation of transcription, DNA-templated [GO:0006355 biological_process] (1); protein binding [GO:0005515 molecular_function] (1)                                                                                                                                                                               | MATH/TRAF domain [IPR002083] (1); TRAF-like [IPR008974] (1)                                                                                                                                                                 | scaffold_5_mRNA_3029.1           | -                           | -                               |
| GF0030264 | 1                             | 0                        | 0                            | 0 Hypothetical protein (1)                                            | protein binding [GO:0005515 molecular_function] (1)                                                                                                                                                                                                                                                               | MATH/TRAF domain [IPR002083] (1); TRAF-like [IPR008974] (1)                                                                                                                                                                 | scaffold_5_mRNA_3028.1           | -                           | -                               |
| GF0030263 | 1                             | 0                        | 0                            | 0 Hypothetical protein (1)                                            | protein binding [GO:0005515 molecular_function] (1)                                                                                                                                                                                                                                                               | MATH/TRAF domain [IPR002083] (1); TRAF-like [IPR008974] (1)                                                                                                                                                                 | scaffold_5_mRNA_3026.1           | -                           | -                               |
| GF0030262 | 1                             | 0                        | 0                            | 0 BTB/POZ and MATH domain protein (1)                                 | protein binding [GO:0005515 molecular_function] (1)                                                                                                                                                                                                                                                               | MATH/TRAF domain [IPR002083] (1); TRAF-like [IPR008974] (1)                                                                                                                                                                 | scaffold_5_mRNA_3024.1           | -                           | -                               |
| GF0030261 | 1                             | 0                        | 0                            | 0 Envelope glycoprotein (1)                                           | protein binding [GO:0005515 molecular_function] (1)                                                                                                                                                                                                                                                               | MATH/TRAF domain [IPR002083] (1)                                                                                                                                                                                            | scaffold_5_mRNA_3023.1           | -                           | -                               |
| GF0030260 | 1                             | 0                        | 0                            | 0 Envelope glycoprotein (1)                                           |                                                                                                                                                                                                                                                                                                                   |                                                                                                                                                                                                                             | scaffold_5_mRNA_3021.1           | -                           | -                               |
| GF0030259 | 1                             | 0                        | 0                            | 0 Hypothetical protein (1)                                            | catalytic activity [GO:0003824 molecular_function] (1); metabolic process [GO:0008152 biological_process] (1)                                                                                                                                                                                                     | Type I phosphohydrolase/nucleotide pyrophosphatase/phosphatase transferase [IPR025911] (1); Alkaline phosphatase-like, alpha/beta/alpha [IPR017849] (1); Alkaline-phosphatase-like, core domain [IPR017850] (1)             | scaffold_5_mRNA_302.1            | -                           | -                               |
| GF0030258 | 1                             | 0                        | 0                            | 0 Hypothetical protein (1)                                            |                                                                                                                                                                                                                                                                                                                   |                                                                                                                                                                                                                             | scaffold_5_mRNA_3011.1           | -                           | -                               |
| GF0030257 | 1                             | 0                        | 0                            | 0 Hypothetical protein (1)                                            |                                                                                                                                                                                                                                                                                                                   |                                                                                                                                                                                                                             | scaffold_5_mRNA_3008.1           | -                           | -                               |
| GF0030256 | 1                             | 0                        | 0                            | 0 Cytokinin riboside 5'-monophosphate phosphoribohydrolase (1)        |                                                                                                                                                                                                                                                                                                                   | LOG family [IPR031100] (1)                                                                                                                                                                                                  | scaffold_5_mRNA_3007.1           | -                           | -                               |
| GF0030255 | 1                             | 0                        | 0                            | 0 Hypothetical protein (1)                                            | nucleic acid binding [GO:0003676 molecular_function] (1); zinc ion binding [GO:0008270 molecular_function] (1)                                                                                                                                                                                                    | Zinc finger, CCHC-type [IPR001878] (1); Zinc finger, SWIM-type [IPR007527] (1); Zinc finger, PMZ-type [IPR006564] (1); Transposase, MuDR, plant [IPR004332] (1)                                                             | scaffold_5_mRNA_3001.1           | -                           | -                               |
| GF0030254 | 1                             | 0                        | 0                            | 0 Hypothetical protein (1)                                            |                                                                                                                                                                                                                                                                                                                   |                                                                                                                                                                                                                             | scaffold_5_mRNA_2996.1           | -                           | -                               |
| GF0030253 | 1                             | 0                        | 0                            | 0 Cytokinin riboside 5'-monophosphate phosphoribohydrolase (1)        |                                                                                                                                                                                                                                                                                                                   |                                                                                                                                                                                                                             | scaffold_5_mRNA_2992.1           | -                           | -                               |
| GF0030252 | 1                             | 0                        | 0                            | 0 Hypothetical protein (1)                                            |                                                                                                                                                                                                                                                                                                                   |                                                                                                                                                                                                                             | scaffold_5_mRNA_299.1            | -                           | -                               |
| GF0030251 | 1                             | 0                        | 0                            | 0 Cytochrome P450 82A3 (1)                                            | iron ion binding [GO:0005506 molecular_function] (1); heme binding [GO:0020037 molecular_function] (1); oxidation-reduction process [GO:005114 biological_process] (1); oxidoreductase activity, acting on paired donors, with incorporation or reduction of molecular oxygen [GO:0016705 molecular_function] (1) | Cytochrome P450, conserved site [IPR017972] (1); Cytochrome P450, E-class, group 1 [IPR002401] (1); Cytochrome P450 [IPR001128] (1)                                                                                         | scaffold_5_mRNA_2986.1           | -                           | -                               |
| GF0030250 | 1                             | 0                        | 0                            | 0 Hypothetical protein (1)                                            |                                                                                                                                                                                                                                                                                                                   |                                                                                                                                                                                                                             | scaffold_5_mRNA_2985.1           | -                           | -                               |
| GF0030249 | 1                             | 0                        | 0                            | 0 Hypothetical protein (1)                                            |                                                                                                                                                                                                                                                                                                                   |                                                                                                                                                                                                                             | scaffold_5_mRNA_2982.1           | -                           | -                               |
| GF0030248 | 1                             | 0                        | 0                            | 0 Hypothetical protein (1)                                            |                                                                                                                                                                                                                                                                                                                   |                                                                                                                                                                                                                             | scaffold_5_mRNA_2980.1           | -                           | -                               |
| GF0030247 | 1                             | 0                        | 0                            | 0 Hypothetical protein (1)                                            | nucleic acid binding [GO:0003676 molecular_function] (1); regulation of transcription, DNA-templated [GO:0006355 biological_process] (1)                                                                                                                                                                          | Carlavirus nucleic acid-binding protein [IPR025688] (1)                                                                                                                                                                     | scaffold_5_mRNA_298.1            | -                           | -                               |
| GF0030246 | 1                             | 0                        | 0                            | 0 Hypothetical protein (1)                                            |                                                                                                                                                                                                                                                                                                                   | DnaJ domain [IPR001623] (1); DnaJ domain, conserved site [IPR018253] (1)                                                                                                                                                    | scaffold_5_mRNA_2973.1           | -                           | -                               |
| GF0030245 | 1                             | 0                        | 0                            | 0 Cytochrome P450 82A3, putative (1)                                  | iron ion binding [GO:0005506 molecular_function] (1); heme binding [GO:0020037 molecular_function] (1); oxidation-reduction process [GO:005114 biological_process] (1); oxidoreductase activity, acting on paired donors, with incorporation or reduction of molecular oxygen [GO:0016705 molecular_function] (1) | Cytochrome P450, E-class, group 1 [IPR002401] (1); Cytochrome P450, conserved site [IPR017972] (1); Cytochrome P450 [IPR001128] (1)                                                                                         | scaffold_5_mRNA_2970.1           | -                           | -                               |
| GF0030244 | 1                             | 0                        | 0                            | 0 Hypothetical protein (1)                                            |                                                                                                                                                                                                                                                                                                                   |                                                                                                                                                                                                                             | scaffold_5_mRNA_297.1            | -                           | -                               |
| GF0030243 | 1                             | 0                        | 0                            | 0 SLG-Sc and SLA-Sc genes and Melmoth retrotransposon sequence (1)    |                                                                                                                                                                                                                                                                                                                   |                                                                                                                                                                                                                             | scaffold_5_mRNA_2969.1           | -                           | -                               |

| ID        | Num. in <i>C. clementiae</i> | Num. in <i>C. uchiha</i> | Num. in <i>P. trifoliata</i> | Note                                                             | GO                                                                                                                                                                                                                                                            | InterPro                                                                                                                                                                                                                                               | Members in <i>C. clementiae</i> | Members in <i>C. uchiha</i> | Members in <i>P. trifoliata</i> |
|-----------|------------------------------|--------------------------|------------------------------|------------------------------------------------------------------|---------------------------------------------------------------------------------------------------------------------------------------------------------------------------------------------------------------------------------------------------------------|--------------------------------------------------------------------------------------------------------------------------------------------------------------------------------------------------------------------------------------------------------|---------------------------------|-----------------------------|---------------------------------|
| GF0030242 | 1                            | 0                        | 0                            | Putative hAT family dimerisation domain containing protein (1)   | protein dimerization activity [GO:0046983 molecular_function] (1); nucleic acid binding [GO:0003676 molecular_function] (1); DNA binding [GO:0003677 molecular_function] (1)                                                                                  | HAT, C-terminal dimerisation domain [IPR008986] (1); hAT-like transposase, RNase-H fold [IPR025252] (1); Ribonuclease H-like domain [IPR012337] (1)                                                                                                    | scaffold_5_mRNA_2968.1          | -                           | -                               |
| GF0030241 | 1                            | 0                        | 0                            | 14 kDa proline-rich protein DC2.15 (1)                           |                                                                                                                                                                                                                                                               | Hydrophobic seed protein [IPR027923] (1); Bifunctional tubulin/plant lipid transfer protein/seed storage helical domain [IPR016140] (1)                                                                                                                | scaffold_5_mRNA_2962.1          | -                           | -                               |
| GF0030240 | 1                            | 0                        | 0                            | Hypothetical protein (1)                                         |                                                                                                                                                                                                                                                               |                                                                                                                                                                                                                                                        | scaffold_5_mRNA_2961.1          | -                           | -                               |
| GF0030239 | 1                            | 0                        | 0                            | Hypothetical protein (1)                                         |                                                                                                                                                                                                                                                               |                                                                                                                                                                                                                                                        | scaffold_5_mRNA_2957.1          | -                           | -                               |
| GF0030238 | 1                            | 0                        | 0                            | Hypothetical protein (1)                                         |                                                                                                                                                                                                                                                               |                                                                                                                                                                                                                                                        | scaffold_5_mRNA_2952.1          | -                           | -                               |
| GF0030237 | 1                            | 0                        | 0                            | Hypothetical protein (1)                                         |                                                                                                                                                                                                                                                               | Ankyrin repeat-containing domain [IPR020683] (1)                                                                                                                                                                                                       | scaffold_5_mRNA_2941.1          | -                           | -                               |
| GF0030236 | 1                            | 0                        | 0                            | Hypothetical protein (1)                                         | nucleic acid binding [GO:0003676 molecular_function] (1)                                                                                                                                                                                                      | Ribonuclease H-like domain [IPR012337] (1)                                                                                                                                                                                                             | scaffold_5_mRNA_2939.1          | -                           | -                               |
| GF0030235 | 1                            | 0                        | 0                            | Hypothetical protein (1)                                         |                                                                                                                                                                                                                                                               |                                                                                                                                                                                                                                                        | scaffold_5_mRNA_2937.1          | -                           | -                               |
| GF0030234 | 1                            | 0                        | 0                            | Hypothetical protein (1)                                         |                                                                                                                                                                                                                                                               |                                                                                                                                                                                                                                                        | scaffold_5_mRNA_2936.1          | -                           | -                               |
| GF0030233 | 1                            | 0                        | 0                            | Ankyrin repeat plant-like protein (1)                            | protein binding [GO:0005515 molecular_function] (1)                                                                                                                                                                                                           | Ankyrin repeat [IPR002110] (1); PGG domain [IPR026961] (1); Ankyrin repeat-containing domain [IPR020683] (1)                                                                                                                                           | scaffold_5_mRNA_2934.1          | -                           | -                               |
| GF0030232 | 1                            | 0                        | 0                            | Hypothetical protein (1)                                         |                                                                                                                                                                                                                                                               |                                                                                                                                                                                                                                                        | scaffold_5_mRNA_2930.1          | -                           | -                               |
| GF0030231 | 1                            | 0                        | 0                            | Hypothetical protein (1)                                         |                                                                                                                                                                                                                                                               |                                                                                                                                                                                                                                                        | scaffold_5_mRNA_2926.1          | -                           | -                               |
| GF0030230 | 1                            | 0                        | 0                            | Hypothetical protein (1)                                         | regulation of transcription, DNA-templated [GO:0006355 biological_process] (1)                                                                                                                                                                                | FH3 FAR1 family [IPR010521] (1); Domain of unknown function DUF3627 [IPR022549] (1)                                                                                                                                                                    | scaffold_5_mRNA_2925.1          | -                           | -                               |
| GF0030229 | 1                            | 0                        | 0                            | Hypothetical protein (1)                                         |                                                                                                                                                                                                                                                               |                                                                                                                                                                                                                                                        | scaffold_5_mRNA_2924.1          | -                           | -                               |
| GF0030228 | 1                            | 0                        | 0                            | Hypothetical protein (1)                                         |                                                                                                                                                                                                                                                               |                                                                                                                                                                                                                                                        | scaffold_5_mRNA_2923.1          | -                           | -                               |
| GF0030227 | 1                            | 0                        | 0                            | Hypothetical protein (1)                                         | nucleic acid binding [GO:0003676 molecular_function] (1); zinc ion binding [GO:0008270 molecular_function] (1)                                                                                                                                                | Zinc finger, CCHC-type [IPR001878] (1)                                                                                                                                                                                                                 | scaffold_5_mRNA_2922.1          | -                           | -                               |
| GF0030226 | 1                            | 0                        | 0                            | Hypothetical protein (1)                                         |                                                                                                                                                                                                                                                               |                                                                                                                                                                                                                                                        | scaffold_5_mRNA_2919.1          | -                           | -                               |
| GF0030225 | 1                            | 0                        | 0                            | Hypothetical protein (1)                                         | nucleic acid binding [GO:0003676 molecular_function] (1)                                                                                                                                                                                                      | Ribonuclease H-like domain [IPR012337] (1)                                                                                                                                                                                                             | scaffold_5_mRNA_2914.1          | -                           | -                               |
| GF0030224 | 1                            | 0                        | 0                            | Hypothetical protein (1)                                         |                                                                                                                                                                                                                                                               |                                                                                                                                                                                                                                                        | scaffold_5_mRNA_2908.1          | -                           | -                               |
| GF0030223 | 1                            | 0                        | 0                            | Hypothetical protein (1)                                         | nucleic acid binding [GO:0003676 molecular_function] (1); ATP binding [GO:0005524 molecular_function] (1)                                                                                                                                                     | Helicase superfamily 1/2, ATP-binding domain [IPR014001] (1); DEAD/DEAH box helicase domain [IPR011545] (1); P-loop containing nucleoside triphosphate hydrolase [IPR027417] (1); ATP-dependent RNA helicase DEAD-box, conserved site [IPR000629] (1)  | scaffold_5_mRNA_2905.1          | -                           | -                               |
| GF0030222 | 1                            | 0                        | 0                            | Hypothetical protein (1)                                         |                                                                                                                                                                                                                                                               |                                                                                                                                                                                                                                                        | scaffold_5_mRNA_2904.1          | -                           | -                               |
| GF0030221 | 1                            | 0                        | 0                            | Hypothetical protein (1)                                         |                                                                                                                                                                                                                                                               |                                                                                                                                                                                                                                                        | scaffold_5_mRNA_2903.1          | -                           | -                               |
| GF0030220 | 1                            | 0                        | 0                            | Hypothetical protein (1)                                         |                                                                                                                                                                                                                                                               | LOG family [IPR031100] (1)                                                                                                                                                                                                                             | scaffold_5_mRNA_2897.1          | -                           | -                               |
| GF0030219 | 1                            | 0                        | 0                            | Hypothetical protein (1)                                         |                                                                                                                                                                                                                                                               |                                                                                                                                                                                                                                                        | scaffold_5_mRNA_2893.1          | -                           | -                               |
| GF0030218 | 1                            | 0                        | 0                            | Hypothetical protein (1)                                         |                                                                                                                                                                                                                                                               |                                                                                                                                                                                                                                                        | scaffold_5_mRNA_2892.1          | -                           | -                               |
| GF0030217 | 1                            | 0                        | 0                            | Hypothetical protein (1)                                         |                                                                                                                                                                                                                                                               |                                                                                                                                                                                                                                                        | scaffold_5_mRNA_2890.1          | -                           | -                               |
| GF0030216 | 1                            | 0                        | 0                            | Hypothetical protein (1)                                         |                                                                                                                                                                                                                                                               |                                                                                                                                                                                                                                                        | scaffold_5_mRNA_2889.1          | -                           | -                               |
| GF0030215 | 1                            | 0                        | 0                            | Hypothetical protein (1)                                         |                                                                                                                                                                                                                                                               | Retrotransposon gag domain [IPR005162] (1); Reverse transcriptase, RNA-dependent DNA polymerase [IPR013103] (1)                                                                                                                                        | scaffold_5_mRNA_2873.1          | -                           | -                               |
| GF0030214 | 1                            | 0                        | 0                            | Hypothetical protein (1)                                         |                                                                                                                                                                                                                                                               |                                                                                                                                                                                                                                                        | scaffold_5_mRNA_2872.1          | -                           | -                               |
| GF0030213 | 1                            | 0                        | 0                            | Transposase (1)                                                  | proteolysis [GO:0006508 biological_process] (1); cysteine-type peptidase activity [GO:0008234 molecular_function] (1)                                                                                                                                         | Upl1 protease family, C-terminal catalytic domain [IPR003653] (1)                                                                                                                                                                                      | scaffold_5_mRNA_2868.1          | -                           | -                               |
| GF0030212 | 1                            | 0                        | 0                            | Disease resistance protein (CC-NBS-LRR class) family protein (1) | ADP binding [GO:0043531 molecular_function] (1)                                                                                                                                                                                                               | P-loop containing nucleoside triphosphate hydrolase [IPR027417] (1); NB-ARC [IPR002182] (1); AAA+ ATPase domain [IPR003593] (1); Winged helix-turn-helix DNA-binding domain [IPR011991] (1); Leucine-rich repeat domain, L domain-like [IPR032675] (1) | scaffold_5_mRNA_2866.1          | -                           | -                               |
| GF0030211 | 1                            | 0                        | 0                            | Hypothetical protein (1)                                         |                                                                                                                                                                                                                                                               |                                                                                                                                                                                                                                                        | scaffold_5_mRNA_2864.1          | -                           | -                               |
| GF0030210 | 1                            | 0                        | 0                            | Hypothetical protein (1)                                         | DNA binding [GO:0003677 molecular_function] (1); nucleic acid binding [GO:0003676 molecular_function] (1)                                                                                                                                                     | Zinc finger, BED-type [IPR003656] (1); Zinc finger C2H2-type [IPR013087] (1)                                                                                                                                                                           | scaffold_5_mRNA_2863.1          | -                           | -                               |
| GF0030209 | 1                            | 0                        | 0                            | Hypothetical protein (1)                                         |                                                                                                                                                                                                                                                               |                                                                                                                                                                                                                                                        | scaffold_5_mRNA_2862.1          | -                           | -                               |
| GF0030208 | 1                            | 0                        | 0                            | UHP0481 protein (1)                                              |                                                                                                                                                                                                                                                               | Protein of unknown function DUF247, plant [IPR004158] (1)                                                                                                                                                                                              | scaffold_5_mRNA_2861.1          | -                           | -                               |
| GF0030207 | 1                            | 0                        | 0                            | Hypothetical protein (1)                                         | nucleic acid binding [GO:0003676 molecular_function] (1)                                                                                                                                                                                                      | Ribonuclease H-like domain [IPR012337] (1)                                                                                                                                                                                                             | scaffold_5_mRNA_286.1           | -                           | -                               |
| GF0030206 | 1                            | 0                        | 0                            | Hypothetical protein (1)                                         |                                                                                                                                                                                                                                                               |                                                                                                                                                                                                                                                        | scaffold_5_mRNA_2858.1          | -                           | -                               |
| GF0030205 | 1                            | 0                        | 0                            | Ribonuclease H protein (1)                                       | nucleic acid binding [GO:0003676 molecular_function] (1); RNA-DNA hybrid ribonuclease activity [GO:0044523 molecular_function] (1)                                                                                                                            | Ribonuclease H domain [IPR002156] (1); Reverse transcriptase zinc-binding domain [IPR026960] (1); Ribonuclease H-like domain [IPR012337] (1)                                                                                                           | scaffold_5_mRNA_2853.1          | -                           | -                               |
| GF0030204 | 1                            | 0                        | 0                            | Hypothetical protein (1)                                         | catalytic activity [GO:0003824 molecular_function] (1); protein dephosphorylation [GO:0006470 biological_process] (1); protein binding [GO:0005515 molecular_function] (1); protein serine/threonine phosphatase activity [GO:0004722 molecular_function] (1) | PPM-type phosphatase domain [IPR001932] (1); Thioredoxin-like fold [IPR012336] (1); Protein phosphatase 2C family [IPR013655] (1); Glutathione S-transferase, N-terminal [IPR004045] (1); Pectin lyase fold [IPR012334] (1)                            | scaffold_5_mRNA_2851.1          | -                           | -                               |
| GF0030203 | 1                            | 0                        | 0                            | Hypothetical protein (1)                                         |                                                                                                                                                                                                                                                               |                                                                                                                                                                                                                                                        | scaffold_5_mRNA_2850.1          | -                           | -                               |
| GF0030202 | 1                            | 0                        | 0                            | Hypothetical protein (1)                                         |                                                                                                                                                                                                                                                               | Retrotransposon gag domain [IPR005162] (1); Aspartic peptidase domain [IPR021109] (1)                                                                                                                                                                  | scaffold_5_mRNA_2849.1          | -                           | -                               |
| GF0030201 | 1                            | 0                        | 0                            | Hypothetical protein (1)                                         |                                                                                                                                                                                                                                                               |                                                                                                                                                                                                                                                        | scaffold_5_mRNA_2848.1          | -                           | -                               |
| GF0030200 | 1                            | 0                        | 0                            | Hypothetical protein (1)                                         | lipid binding [GO:0006289 molecular_function] (1); transferase activity, transferring hexosyl groups [GO:0016758 molecular_function] (1); metabolic process [GO:0008152 biological_process] (1)                                                               | START-like domain [IPR023393] (1); START domain [IPR02913] (1)                                                                                                                                                                                         | scaffold_5_mRNA_2843.1          | -                           | -                               |
| GF0030199 | 1                            | 0                        | 0                            | Hypothetical protein (1)                                         |                                                                                                                                                                                                                                                               | UDP-glucuronosylUDP-glucosyltransferase [IPR002213] (1)                                                                                                                                                                                                | scaffold_5_mRNA_2842.1          | -                           | -                               |
| GF0030198 | 1                            | 0                        | 0                            | Hypothetical protein (1)                                         |                                                                                                                                                                                                                                                               |                                                                                                                                                                                                                                                        | scaffold_5_mRNA_2841.1          | -                           | -                               |
| GF0030197 | 1                            | 0                        | 0                            | Resistance protein RGC2 (1)                                      |                                                                                                                                                                                                                                                               | Leucine-rich repeat domain, L domain-like [IPR032675] (1); Protein ENHANCED DISEASE RESISTANCE 2, C-terminal [IPR009769] (1)                                                                                                                           | scaffold_5_mRNA_2839.1          | -                           | -                               |
| GF0030196 | 1                            | 0                        | 0                            | Hypothetical protein (1)                                         |                                                                                                                                                                                                                                                               |                                                                                                                                                                                                                                                        | scaffold_5_mRNA_2836.1          | -                           | -                               |
| GF0030195 | 1                            | 0                        | 0                            | Hypothetical protein (1)                                         |                                                                                                                                                                                                                                                               | Anatolipos retrotransposon Orf1 [IPR004312] (1)                                                                                                                                                                                                        | scaffold_5_mRNA_2834.1          | -                           | -                               |
| GF0030194 | 1                            | 0                        | 0                            | Hypothetical protein (1)                                         |                                                                                                                                                                                                                                                               |                                                                                                                                                                                                                                                        | scaffold_5_mRNA_2832.1          | -                           | -                               |
| GF0030193 | 1                            | 0                        | 0                            | Hypothetical protein (1)                                         |                                                                                                                                                                                                                                                               |                                                                                                                                                                                                                                                        | scaffold_5_mRNA_2831.1          | -                           | -                               |
| GF0030192 | 1                            | 0                        | 0                            | Phosphoprotein phosphatase isoform 1 (1)                         |                                                                                                                                                                                                                                                               | Leucine-rich repeat domain, L domain-like [IPR032675] (1)                                                                                                                                                                                              | scaffold_5_mRNA_2829.1          | -                           | -                               |
| GF0030191 | 1                            | 0                        | 0                            | Hypothetical protein (1)                                         | metabolic process [GO:0008152 biological_process] (1); transferase activity, transferring hexosyl groups [GO:0016758 molecular_function] (1)                                                                                                                  | UDP-glucuronosylUDP-glucosyltransferase [IPR002213] (1)                                                                                                                                                                                                | scaffold_5_mRNA_2828.1          | -                           | -                               |
| GF0030190 | 1                            | 0                        | 0                            | Disease resistance protein (CC-NBS-LRR class) family protein (1) | ADP binding [GO:0043531 molecular_function] (1)                                                                                                                                                                                                               | Leucine-rich repeat domain, L domain-like [IPR032675] (1); Winged helix-turn-helix DNA-binding domain [IPR011991] (1); P-loop containing nucleoside triphosphate hydrolase [IPR027417] (1); AAA+ ATPase domain [IPR003593] (1); NB-ARC [IPR002182] (1) | scaffold_5_mRNA_2826.1          | -                           | -                               |
| GF0030189 | 1                            | 0                        | 0                            | Hypothetical protein (1)                                         |                                                                                                                                                                                                                                                               |                                                                                                                                                                                                                                                        | scaffold_5_mRNA_2823.1          | -                           | -                               |
| GF0030188 | 1                            | 0                        | 0                            | Hypothetical protein (1)                                         |                                                                                                                                                                                                                                                               |                                                                                                                                                                                                                                                        | scaffold_5_mRNA_282.1           | -                           | -                               |
| GF0030187 | 1                            | 0                        | 0                            | Hypothetical protein (1)                                         |                                                                                                                                                                                                                                                               | Protein-like domain [IPR008502] (1)                                                                                                                                                                                                                    | scaffold_5_mRNA_2819.1          | -                           | -                               |
| GF0030186 | 1                            | 0                        | 0                            | Hypothetical protein (1)                                         |                                                                                                                                                                                                                                                               | Aspartic peptidase domain [IPR002109] (1)                                                                                                                                                                                                              | scaffold_5_mRNA_2816.1          | -                           | -                               |
| GF0030185 | 1                            | 0                        | 0                            | Cytokinin riboside 5'-monophosphate phosphoribohydrolase (1)     |                                                                                                                                                                                                                                                               | LOG family [IPR031100] (1)                                                                                                                                                                                                                             | scaffold_5_mRNA_2815.1          | -                           | -                               |
| GF0030184 | 1                            | 0                        | 0                            | Hypothetical protein (1)                                         |                                                                                                                                                                                                                                                               |                                                                                                                                                                                                                                                        | scaffold_5_mRNA_2812.1          | -                           | -                               |
| GF0030183 | 1                            | 0                        | 0                            | DUF247 domain protein (1)                                        |                                                                                                                                                                                                                                                               | Protein of unknown function DUF247, plant [IPR004158] (1)                                                                                                                                                                                              | scaffold_5_mRNA_2811.1          | -                           | -                               |
| GF0030182 | 1                            | 0                        | 0                            | UDP-glucosyltransferase 73C2 (1)                                 | transferase activity, transferring hexosyl groups [GO:0016758 molecular_function] (1); metabolic process [GO:0008152 biological_process] (1)                                                                                                                  | UDP-glucuronosylUDP-glucosyltransferase [IPR002213] (1)                                                                                                                                                                                                | scaffold_5_mRNA_2810.1          | -                           | -                               |
| GF0030181 | 1                            | 0                        | 0                            | Hypothetical protein (1)                                         |                                                                                                                                                                                                                                                               |                                                                                                                                                                                                                                                        | scaffold_5_mRNA_281.1           | -                           | -                               |

| ID        | Num. in <i>C. clematitae</i> | Num. in <i>C. uchiha</i> | Num. in <i>P. trifoliata</i> | Note                                                             | GO                                                                                                                                                                                                                             | InterPro                                                                                                                                                                                                                                                                                                           | Members in <i>Clematitae</i> | Members in <i>Uchiha</i> | Members in <i>P. trifoliata</i> |
|-----------|------------------------------|--------------------------|------------------------------|------------------------------------------------------------------|--------------------------------------------------------------------------------------------------------------------------------------------------------------------------------------------------------------------------------|--------------------------------------------------------------------------------------------------------------------------------------------------------------------------------------------------------------------------------------------------------------------------------------------------------------------|------------------------------|--------------------------|---------------------------------|
| GF0030180 | 1                            | 0                        | 0                            | Disease resistance protein (CC-NBS-LRR class) family protein (1) | ADP binding [GO:0043531 molecular_function] (1)                                                                                                                                                                                | Leucine-rich repeat domain, L domain-like [IPR032675] (1); AAA+ ATPase domain [IPR001595] (1); NB-ARC [IPR002182] (1); P-loop containing nucleoside triphosphate hydrolase [IPR027471] (1)                                                                                                                         | scaffold_5_mRNA_2809.1       | -                        | -                               |
| GF0030179 | 1                            | 0                        | 0                            | Hypothetical protein (1)                                         |                                                                                                                                                                                                                                | Leucine-rich repeat domain, L domain-like [IPR032675] (1); Probable transposase, Pta/En/Spn, plant [IPR04252] (1)                                                                                                                                                                                                  | scaffold_5_mRNA_2805.1       | -                        | -                               |
| GF0030178 | 1                            | 0                        | 0                            | Glutathione-S-transferase omega (1)                              | protein binding [GO:0005515 molecular_function] (1)                                                                                                                                                                            | Thioredoxin-like fold [IPR012336] (1); Glutathione S-transferase, N-terminal [IPR004045] (1)                                                                                                                                                                                                                       | scaffold_5_mRNA_2800.1       | -                        | -                               |
| GF0030177 | 1                            | 0                        | 0                            | Disease resistance protein RPS2 (1)                              |                                                                                                                                                                                                                                | Leucine-rich repeat domain, L domain-like [IPR032675] (1)                                                                                                                                                                                                                                                          | scaffold_5_mRNA_2799.1       | -                        | -                               |
| GF0030176 | 1                            | 0                        | 0                            | Hypothetical protein (1)                                         |                                                                                                                                                                                                                                | Protein ENHANCED DISEASE RESISTANCE 2, C-terminal [IPR009769] (1)                                                                                                                                                                                                                                                  | scaffold_5_mRNA_2798.1       | -                        | -                               |
| GF0030175 | 1                            | 0                        | 0                            | Hypothetical protein (1)                                         |                                                                                                                                                                                                                                | Leucine-rich repeat domain, L domain-like [IPR032675] (1)                                                                                                                                                                                                                                                          | scaffold_5_mRNA_2794.1       | -                        | -                               |
| GF0030174 | 1                            | 0                        | 0                            | Hypothetical protein (1)                                         |                                                                                                                                                                                                                                |                                                                                                                                                                                                                                                                                                                    | scaffold_5_mRNA_2793.1       | -                        | -                               |
| GF0030173 | 1                            | 0                        | 0                            | Hypothetical protein (1)                                         |                                                                                                                                                                                                                                |                                                                                                                                                                                                                                                                                                                    | scaffold_5_mRNA_2792.1       | -                        | -                               |
| GF0030172 | 1                            | 0                        | 0                            | Hypothetical protein (1)                                         |                                                                                                                                                                                                                                | Protein ENHANCED DISEASE RESISTANCE 2, C-terminal [IPR009769] (1)                                                                                                                                                                                                                                                  | scaffold_5_mRNA_2790.1       | -                        | -                               |
| GF0030171 | 1                            | 0                        | 0                            | Cytochrome c oxidase biogenesis protein Cmc1-like isoform 1 (1)  |                                                                                                                                                                                                                                | Cytochrome c oxidase biogenesis protein Cmc1-like [IPR015892] (1)                                                                                                                                                                                                                                                  | scaffold_5_mRNA_2791.1       | -                        | -                               |
| GF0030170 | 1                            | 0                        | 0                            | Disease resistance protein (1)                                   | ADP binding [GO:0043531 molecular_function] (1)                                                                                                                                                                                | Winged helix-turn-helix DNA-binding domain [IPR011991] (1); Leucine-rich repeat domain, L domain-like [IPR032675] (1); P-loop containing nucleoside triphosphate hydrolase [IPR027471] (1); AAA+ ATPase domain [IPR003593] (1); NB-ARC [IPR002182] (1)                                                             | scaffold_5_mRNA_2787.1       | -                        | -                               |
| GF0030169 | 1                            | 0                        | 0                            | Disease resistance protein RPS2 (1)                              |                                                                                                                                                                                                                                | Leucine-rich repeat domain, L domain-like [IPR032675] (1)                                                                                                                                                                                                                                                          | scaffold_5_mRNA_2786.1       | -                        | -                               |
| GF0030168 | 1                            | 0                        | 0                            | Hypothetical protein (1)                                         |                                                                                                                                                                                                                                |                                                                                                                                                                                                                                                                                                                    | scaffold_5_mRNA_2780.1       | -                        | -                               |
| GF0030167 | 1                            | 0                        | 0                            | Hypothetical protein (1)                                         |                                                                                                                                                                                                                                |                                                                                                                                                                                                                                                                                                                    | scaffold_5_mRNA_2778.1       | -                        | -                               |
| GF0030166 | 1                            | 0                        | 0                            | RNA-directed DNA polymerase (1)                                  | RNA-DNA hybrid ribonuclease activity [GO:004523 molecular_function] (1); nucleic acid binding [GO:0003676 molecular_function] (1)                                                                                              | Reverse transcriptase zinc-binding domain [IPR026960] (1); Ribonuclease H-like domain [IPR012337] (1); Ribonuclease H domain [IPR002156] (1)                                                                                                                                                                       | scaffold_5_mRNA_2776.1       | -                        | -                               |
| GF0030165 | 1                            | 0                        | 0                            | Hypothetical protein (1)                                         | protein dimerization activity [GO:0046983 molecular_function] (1); nucleic acid binding [GO:0003676 molecular_function] (1)                                                                                                    | HAT, C-terminal dimerisation domain [IPR008906] (1); Ribonuclease H-like domain [IPR012337] (1)                                                                                                                                                                                                                    | scaffold_5_mRNA_2775.1       | -                        | -                               |
| GF0030164 | 1                            | 0                        | 0                            | Disease resistance protein (CC-NBS-LRR class) family protein (1) | ADP binding [GO:0043531 molecular_function] (1)                                                                                                                                                                                | Winged helix-turn-helix DNA-binding domain [IPR011991] (1); Leucine-rich repeat domain, L domain-like [IPR032675] (1); NB-ARC [IPR002182] (1); AAA+ ATPase domain [IPR003593] (1); P-loop containing nucleoside triphosphate hydrolase [IPR027471] (1)                                                             | scaffold_5_mRNA_2769.1       | -                        | -                               |
| GF0030163 | 1                            | 0                        | 0                            | Hypothetical protein (1)                                         | cell wall macromolecule catabolic process [GO:0016998 biological_process] (1); chitinase activity [GO:0004568 molecular_function] (1); chitin catabolic process [GO:0006032 biological_process] (1)                            | Lysozyme-like domain [IPR023346] (1); Glycoside hydrolase, family 19, catalytic [IPR000726] (1)                                                                                                                                                                                                                    | scaffold_5_mRNA_2763.1       | -                        | -                               |
| GF0030162 | 1                            | 0                        | 0                            | Putative glutamyl endopeptidase, chloroplast (1)                 |                                                                                                                                                                                                                                |                                                                                                                                                                                                                                                                                                                    | scaffold_5_mRNA_276.1        | -                        | -                               |
| GF0030161 | 1                            | 0                        | 0                            | Hypothetical protein (1)                                         |                                                                                                                                                                                                                                |                                                                                                                                                                                                                                                                                                                    | scaffold_5_mRNA_2759.1       | -                        | -                               |
| GF0030160 | 1                            | 0                        | 0                            | Hypothetical protein (1)                                         |                                                                                                                                                                                                                                | Viral movement protein [IPR028919] (1)                                                                                                                                                                                                                                                                             | scaffold_5_mRNA_2758.1       | -                        | -                               |
| GF0030159 | 1                            | 0                        | 0                            | Non-LTR retroelement reverse transcriptase-like protein (1)      |                                                                                                                                                                                                                                | Reverse transcriptase zinc-binding domain [IPR026960] (1)                                                                                                                                                                                                                                                          | scaffold_5_mRNA_2757.1       | -                        | -                               |
| GF0030158 | 1                            | 0                        | 0                            | Hypothetical protein (1)                                         | nucleic acid binding [GO:0003676 molecular_function] (1)                                                                                                                                                                       | Ribonuclease H-like domain [IPR012337] (1); Pwi domain [IPR003165] (1)                                                                                                                                                                                                                                             | scaffold_5_mRNA_2756.1       | -                        | -                               |
| GF0030157 | 1                            | 0                        | 0                            | Hypothetical protein (1)                                         | nucleic acid binding [GO:0003676 molecular_function] (1)                                                                                                                                                                       | Ribonuclease H-like domain [IPR012337] (1); Pwi domain [IPR003165] (1)                                                                                                                                                                                                                                             | scaffold_5_mRNA_2755.1       | -                        | -                               |
| GF0030156 | 1                            | 0                        | 0                            | Hypothetical protein (1)                                         |                                                                                                                                                                                                                                |                                                                                                                                                                                                                                                                                                                    | scaffold_5_mRNA_2752.1       | -                        | -                               |
| GF0030155 | 1                            | 0                        | 0                            | Hypothetical protein (1)                                         |                                                                                                                                                                                                                                |                                                                                                                                                                                                                                                                                                                    | scaffold_5_mRNA_2750.1       | -                        | -                               |
| GF0030154 | 1                            | 0                        | 0                            | Hypothetical protein (1)                                         |                                                                                                                                                                                                                                | Retrotransposon gag domain [IPR005162] (1); Aspartic peptidase domain [IPR021109] (1); Retroviral aspartyl protease [IPR013242] (1)                                                                                                                                                                                | scaffold_5_mRNA_275.1        | -                        | -                               |
| GF0030153 | 1                            | 0                        | 0                            | LRR receptor-like kinase family protein (1)                      | protein binding [GO:0005515 molecular_function] (1); ATP binding [GO:0005524 molecular_function] (1); protein phosphorylation [GO:0006468 biological_process] (1); protein kinase activity [GO:0004672 molecular_function] (1) | Serine/threonine-protein kinase, active site [IPR008271] (1); Protein kinase, ATP binding site [IPR017441] (1); Protein kinase-like domain [IPR011009] (1); Leucine-rich repeat domain, L domain-like [IPR032675] (1); Leucine-rich repeat, typical subtype [IPR003591] (1); Protein kinase domain [IPR000719] (1) | scaffold_5_mRNA_2747.1       | -                        | -                               |
| GF0030152 | 1                            | 0                        | 0                            | Hypothetical protein (1)                                         |                                                                                                                                                                                                                                |                                                                                                                                                                                                                                                                                                                    | scaffold_5_mRNA_2746.1       | -                        | -                               |
| GF0030151 | 1                            | 0                        | 0                            | Hypothetical protein (1)                                         |                                                                                                                                                                                                                                |                                                                                                                                                                                                                                                                                                                    | scaffold_5_mRNA_2745.1       | -                        | -                               |
| GF0030150 | 1                            | 0                        | 0                            | Hypothetical protein (1)                                         |                                                                                                                                                                                                                                |                                                                                                                                                                                                                                                                                                                    | scaffold_5_mRNA_2743.1       | -                        | -                               |
| GF0030149 | 1                            | 0                        | 0                            | Hypothetical protein (1)                                         |                                                                                                                                                                                                                                |                                                                                                                                                                                                                                                                                                                    | scaffold_5_mRNA_2742.1       | -                        | -                               |
| GF0030148 | 1                            | 0                        | 0                            | Hypothetical protein (1)                                         |                                                                                                                                                                                                                                |                                                                                                                                                                                                                                                                                                                    | scaffold_5_mRNA_274.1        | -                        | -                               |
| GF0030147 | 1                            | 0                        | 0                            | Cytokinin riboside 5'-monophosphate phosphoribidylase (1)        |                                                                                                                                                                                                                                | Cytokinin riboside 5'-monophosphate phosphoribidylase LOG [IPR005269] (1); LOG family [IPR031100] (1)                                                                                                                                                                                                              | scaffold_5_mRNA_2739.1       | -                        | -                               |
| GF0030146 | 1                            | 0                        | 0                            | Hypothetical protein (1)                                         | zinc ion binding [GO:0008270 molecular_function] (1)                                                                                                                                                                           | Zinc finger, PHZ-type [IPR006564] (1); Zinc finger, SWIM-type [IPR007527] (1)                                                                                                                                                                                                                                      | scaffold_5_mRNA_2738.1       | -                        | -                               |
| GF0030145 | 1                            | 0                        | 0                            | Hypothetical protein (1)                                         |                                                                                                                                                                                                                                |                                                                                                                                                                                                                                                                                                                    | scaffold_5_mRNA_2733.1       | -                        | -                               |
| GF0030144 | 1                            | 0                        | 0                            | Hypothetical protein (1)                                         |                                                                                                                                                                                                                                |                                                                                                                                                                                                                                                                                                                    | scaffold_5_mRNA_2731.1       | -                        | -                               |
| GF0030143 | 1                            | 0                        | 0                            | Hypothetical protein (1)                                         |                                                                                                                                                                                                                                |                                                                                                                                                                                                                                                                                                                    | scaffold_5_mRNA_2729.1       | -                        | -                               |
| GF0030142 | 1                            | 0                        | 0                            | Hypothetical protein (1)                                         |                                                                                                                                                                                                                                |                                                                                                                                                                                                                                                                                                                    | scaffold_5_mRNA_2716.1       | -                        | -                               |
| GF0030141 | 1                            | 0                        | 0                            | Hypothetical protein (1)                                         |                                                                                                                                                                                                                                |                                                                                                                                                                                                                                                                                                                    | scaffold_5_mRNA_2711.1       | -                        | -                               |
| GF0030140 | 1                            | 0                        | 0                            | Hypothetical protein (1)                                         |                                                                                                                                                                                                                                |                                                                                                                                                                                                                                                                                                                    | scaffold_5_mRNA_2710.1       | -                        | -                               |
| GF0030139 | 1                            | 0                        | 0                            | Putative non-LTR retroelement reverse transcriptase (1)          | nucleic acid binding [GO:0003676 molecular_function] (1)                                                                                                                                                                       | Ribonuclease H-like domain [IPR012337] (1); Reverse transcriptase zinc-binding domain [IPR026960] (1); Reverse transcriptase domain [IPR000477] (1)                                                                                                                                                                | scaffold_5_mRNA_2709.1       | -                        | -                               |
| GF0030138 | 1                            | 0                        | 0                            | Hypothetical protein (1)                                         |                                                                                                                                                                                                                                |                                                                                                                                                                                                                                                                                                                    | scaffold_5_mRNA_2708.1       | -                        | -                               |
| GF0030137 | 1                            | 0                        | 0                            | Hypothetical protein (1)                                         |                                                                                                                                                                                                                                |                                                                                                                                                                                                                                                                                                                    | scaffold_5_mRNA_2705.1       | -                        | -                               |
| GF0030136 | 1                            | 0                        | 0                            | Hypothetical protein (1)                                         |                                                                                                                                                                                                                                |                                                                                                                                                                                                                                                                                                                    | scaffold_5_mRNA_2703.1       | -                        | -                               |
| GF0030135 | 1                            | 0                        | 0                            | Hypothetical protein (1)                                         |                                                                                                                                                                                                                                |                                                                                                                                                                                                                                                                                                                    | scaffold_5_mRNA_2699.1       | -                        | -                               |
| GF0030134 | 1                            | 0                        | 0                            | F-box protein CPR30 (1)                                          |                                                                                                                                                                                                                                | F-box associated interaction domain [IPR017451] (1)                                                                                                                                                                                                                                                                | scaffold_5_mRNA_2691.1       | -                        | -                               |
| GF0030133 | 1                            | 0                        | 0                            | Hypothetical protein (1)                                         |                                                                                                                                                                                                                                |                                                                                                                                                                                                                                                                                                                    | scaffold_5_mRNA_269.1        | -                        | -                               |
| GF0030132 | 1                            | 0                        | 0                            | Progesterone 5-beta-reductase (1)                                |                                                                                                                                                                                                                                | NAD(P)-binding domain [IPR016040] (1)                                                                                                                                                                                                                                                                              | scaffold_5_mRNA_2683.1       | -                        | -                               |
| GF0030131 | 1                            | 0                        | 0                            | Progesterone 5-beta-reductase (1)                                |                                                                                                                                                                                                                                | NAD(P)-binding domain [IPR016040] (1)                                                                                                                                                                                                                                                                              | scaffold_5_mRNA_2680.1       | -                        | -                               |
| GF0030130 | 1                            | 0                        | 0                            | Hypothetical protein (1)                                         | nucleic acid binding [GO:0003676 molecular_function] (1)                                                                                                                                                                       | Ribonuclease H-like domain [IPR012337] (1)                                                                                                                                                                                                                                                                         | scaffold_5_mRNA_268.1        | -                        | -                               |
| GF0030129 | 1                            | 0                        | 0                            | Hypothetical protein (1)                                         |                                                                                                                                                                                                                                |                                                                                                                                                                                                                                                                                                                    | scaffold_5_mRNA_2677.1       | -                        | -                               |
| GF0030128 | 1                            | 0                        | 0                            | Progesterone 5-beta-reductase (1)                                |                                                                                                                                                                                                                                | NAD(P)-binding domain [IPR016040] (1)                                                                                                                                                                                                                                                                              | scaffold_5_mRNA_2675.1       | -                        | -                               |
| GF0030127 | 1                            | 0                        | 0                            | Cytokinin riboside 5'-monophosphate phosphoribidylase (1)        |                                                                                                                                                                                                                                | LOG family [IPR031100] (1)                                                                                                                                                                                                                                                                                         | scaffold_5_mRNA_2674.1       | -                        | -                               |
| GF0030126 | 1                            | 0                        | 0                            | Hypothetical protein (1)                                         |                                                                                                                                                                                                                                |                                                                                                                                                                                                                                                                                                                    | scaffold_5_mRNA_2673.1       | -                        | -                               |
| GF0030125 | 1                            | 0                        | 0                            | Hypothetical protein (1)                                         |                                                                                                                                                                                                                                |                                                                                                                                                                                                                                                                                                                    | scaffold_5_mRNA_2670.1       | -                        | -                               |
| GF0030124 | 1                            | 0                        | 0                            | Hypothetical protein (1)                                         |                                                                                                                                                                                                                                |                                                                                                                                                                                                                                                                                                                    | scaffold_5_mRNA_2669.1       | -                        | -                               |
| GF0030123 | 1                            | 0                        | 0                            | Hypothetical protein (1)                                         |                                                                                                                                                                                                                                |                                                                                                                                                                                                                                                                                                                    | scaffold_5_mRNA_2667.1       | -                        | -                               |
| GF0030122 | 1                            | 0                        | 0                            | Hypothetical protein (1)                                         |                                                                                                                                                                                                                                | Viral movement protein [IPR028919] (1)                                                                                                                                                                                                                                                                             | scaffold_5_mRNA_2666.1       | -                        | -                               |
| GF0030121 | 1                            | 0                        | 0                            | Hypothetical protein (1)                                         | ubiquitin-dependent protein catabolic process [GO:0006511 biological_process] (1)                                                                                                                                              | Domain of unknown function DUF4216 [IPR025112] (1); SKP1 component, POZ domain [IPR016073] (1); Transposase-associated domain [IPR029480] (1)                                                                                                                                                                      | scaffold_5_mRNA_2664.1       | -                        | -                               |
| GF0030120 | 1                            | 0                        | 0                            | Hypothetical protein (1)                                         |                                                                                                                                                                                                                                |                                                                                                                                                                                                                                                                                                                    | scaffold_5_mRNA_2661.1       | -                        | -                               |
| GF0030119 | 1                            | 0                        | 0                            | Disease resistance protein (CC-NBS-LRR class) family protein (1) | ADP binding [GO:0043531 molecular_function] (1)                                                                                                                                                                                | NB-ARC [IPR002182] (1); P-loop containing nucleoside triphosphate hydrolase [IPR027471] (1); Leucine-rich repeat domain, L domain-like [IPR032675] (1); Winged helix-turn-helix DNA-binding domain [IPR011991] (1)                                                                                                 | scaffold_5_mRNA_2659.1       | -                        | -                               |

| ID        | Num. in <i>C. clementiae</i> | Num. in <i>C. uachtai</i> | Num. in <i>P. trifoliata</i> | Note                                                               | GO                                                                                                                                                                                                                                        | InterPro                                                                                                                                                                                                                                               | Members in <i>C. clementiae</i> | Members in <i>C. uachtai</i> | Members in <i>P. trifoliata</i> |
|-----------|------------------------------|---------------------------|------------------------------|--------------------------------------------------------------------|-------------------------------------------------------------------------------------------------------------------------------------------------------------------------------------------------------------------------------------------|--------------------------------------------------------------------------------------------------------------------------------------------------------------------------------------------------------------------------------------------------------|---------------------------------|------------------------------|---------------------------------|
| GF0030118 | 1                            | 0                         | 0                            | 0 Resistance protein RGC2 (1)                                      | zinc ion binding [GO:0008270 molecular_function] (1); nucleic acid binding [GO:0003676 molecular_function] (1)                                                                                                                            | Leucine-rich repeat domain, L domain-like [IPR032675] (1); Zinc finger, CCHC-type [IPR01878] (1)                                                                                                                                                       | scaffold_5_mRNA_2658.1          | -                            | -                               |
| GF0030117 | 1                            | 0                         | 0                            | 0 Hypothetical protein (1)                                         |                                                                                                                                                                                                                                           | Retroransposon gag domain [IPR05162] (1)                                                                                                                                                                                                               | scaffold_5_mRNA_2649.1          | -                            | -                               |
| GF0030116 | 1                            | 0                         | 0                            | 0 Hypothetical protein (1)                                         |                                                                                                                                                                                                                                           |                                                                                                                                                                                                                                                        | scaffold_5_mRNA_2646.1          | -                            | -                               |
| GF0030115 | 1                            | 0                         | 0                            | 0 Cytokinin riboside 5'-monophosphate phosphoribohydrolase (1)     |                                                                                                                                                                                                                                           | LOG family [IPR031100] (1); Cytokinin riboside 5'-monophosphate phosphoribohydrolase LOG [IPR005269] (1)                                                                                                                                               | scaffold_5_mRNA_2645.1          | -                            | -                               |
| GF0030114 | 1                            | 0                         | 0                            | 0 Hypothetical protein (1)                                         |                                                                                                                                                                                                                                           |                                                                                                                                                                                                                                                        | scaffold_5_mRNA_2643.1          | -                            | -                               |
| GF0030113 | 1                            | 0                         | 0                            | 0 Putative maDR family transposase-like (1)                        | nucleic acid binding [GO:0003676 biological_process] (1); zinc ion binding [GO:0008270 molecular_function] (1)                                                                                                                            | Zinc finger, CCHC-type [IPR01878] (1); MULE transposase domain [IPR018289] (1); Zinc finger, PMZ-type [IPR05654] (1); Zinc finger, SWIM-type [IPR007527] (1)                                                                                           | scaffold_5_mRNA_2641.1          | -                            | -                               |
| GF0030112 | 1                            | 0                         | 0                            | 0 Hypothetical protein (1)                                         |                                                                                                                                                                                                                                           | Leucine-rich repeat domain, L domain-like [IPR032675] (1)                                                                                                                                                                                              | scaffold_5_mRNA_2638.1          | -                            | -                               |
| GF0030111 | 1                            | 0                         | 0                            | 0 Hypothetical protein (1)                                         |                                                                                                                                                                                                                                           |                                                                                                                                                                                                                                                        | scaffold_5_mRNA_2636.1          | -                            | -                               |
| GF0030110 | 1                            | 0                         | 0                            | 0 Hypothetical protein (1)                                         |                                                                                                                                                                                                                                           | Domain of unknown function DUF4219 [IPR02514] (1)                                                                                                                                                                                                      | scaffold_5_mRNA_2634.1          | -                            | -                               |
| GF0030109 | 1                            | 0                         | 0                            | 0 Hypothetical protein (1)                                         | regulation of transcription, DNA-templated [GO:0006355 biological_process] (1); nucleic acid binding [GO:0003676 molecular_function] (1)                                                                                                  | Carlavirus nucleic acid-binding protein [IPR02568] (1)                                                                                                                                                                                                 | scaffold_5_mRNA_2633.1          | -                            | -                               |
| GF0030108 | 1                            | 0                         | 0                            | 0 Cytokinin riboside 5'-monophosphate phosphoribohydrolase (1)     |                                                                                                                                                                                                                                           | LOG family [IPR031100] (1)                                                                                                                                                                                                                             | scaffold_5_mRNA_2632.1          | -                            | -                               |
| GF0030107 | 1                            | 0                         | 0                            | 0 Hypothetical protein (1)                                         |                                                                                                                                                                                                                                           |                                                                                                                                                                                                                                                        | scaffold_5_mRNA_2631.1          | -                            | -                               |
| GF0030106 | 1                            | 0                         | 0                            | 0 Hypothetical protein (1)                                         | cysteine-type peptidase activity [GO:0008234 molecular_function] (1); proteolysis [GO:0006508 biological_process] (1)                                                                                                                     | Upl1 protease family, C-terminal catalytic domain [IPR003653] (1)                                                                                                                                                                                      | scaffold_5_mRNA_2628.1          | -                            | -                               |
| GF0030105 | 1                            | 0                         | 0                            | 0 Disease resistance protein (CC-NBS-LRR class) family protein (1) | ADP binding [GO:0043531 molecular_function] (1)                                                                                                                                                                                           | NB-ARC [IPR002182] (1); P-loop containing nucleoside triphosphate hydrolase [IPR027417] (1); Winged helix-turn-helix DNA-binding domain [IPR011991] (1); Leucine-rich repeat domain, L domain-like [IPR032675] (1)                                     | scaffold_5_mRNA_2627.1          | -                            | -                               |
| GF0030104 | 1                            | 0                         | 0                            | 0 NB-ARC domain disease resistance protein (1)                     | ADP binding [GO:0043531 molecular_function] (1)                                                                                                                                                                                           | Leucine-rich repeat domain, L domain-like [IPR032675] (1); NB-ARC [IPR002182] (1); P-loop containing nucleoside triphosphate hydrolase [IPR027417] (1)                                                                                                 | scaffold_5_mRNA_2624.1          | -                            | -                               |
| GF0030103 | 1                            | 0                         | 0                            | 0 Hypothetical protein (1)                                         |                                                                                                                                                                                                                                           |                                                                                                                                                                                                                                                        | scaffold_5_mRNA_2622.1          | -                            | -                               |
| GF0030102 | 1                            | 0                         | 0                            | 0 Disease resistance protein (1)                                   | ADP binding [GO:0043531 molecular_function] (1)                                                                                                                                                                                           | P-loop containing nucleoside triphosphate hydrolase [IPR027417] (1); NB-ARC [IPR002182] (1); Leucine-rich repeat domain, L domain-like [IPR032675] (1)                                                                                                 | scaffold_5_mRNA_2620.1          | -                            | -                               |
| GF0030101 | 1                            | 0                         | 0                            | 0 Hypothetical protein (1)                                         | methyltransferase activity [GO:0008168 molecular_function] (1)                                                                                                                                                                            | Putative S-adenosyl-L-methionine-dependent methyltransferase [IPR004159] (1)                                                                                                                                                                           | scaffold_5_mRNA_2619.1          | -                            | -                               |
| GF0030100 | 1                            | 0                         | 0                            | 0 Hypothetical protein (1)                                         |                                                                                                                                                                                                                                           |                                                                                                                                                                                                                                                        | scaffold_5_mRNA_2618.1          | -                            | -                               |
| GF0030099 | 1                            | 0                         | 0                            | 0 Disease resistance protein (CC-NBS-LRR class) family protein (1) | ADP binding [GO:0043531 molecular_function] (1)                                                                                                                                                                                           | Winged helix-turn-helix DNA-binding domain [IPR011991] (1); Leucine-rich repeat domain, L domain-like [IPR032675] (1); NB-ARC [IPR002182] (1); P-loop containing nucleoside triphosphate hydrolase [IPR027417] (1)                                     | scaffold_5_mRNA_2615.1          | -                            | -                               |
| GF0030098 | 1                            | 0                         | 0                            | 0 Disease resistance protein (CC-NBS-LRR class) family protein (1) | ADP binding [GO:0043531 molecular_function] (1)                                                                                                                                                                                           | Winged helix-turn-helix DNA-binding domain [IPR011991] (1); Leucine-rich repeat domain, L domain-like [IPR032675] (1); NB-ARC [IPR002182] (1); P-loop containing nucleoside triphosphate hydrolase [IPR027417] (1)                                     | scaffold_5_mRNA_2612.1          | -                            | -                               |
| GF0030097 | 1                            | 0                         | 0                            | 0 Hypothetical protein (1)                                         |                                                                                                                                                                                                                                           |                                                                                                                                                                                                                                                        | scaffold_5_mRNA_2611.1          | -                            | -                               |
| GF0030096 | 1                            | 0                         | 0                            | 0 Hypothetical protein (1)                                         |                                                                                                                                                                                                                                           |                                                                                                                                                                                                                                                        | scaffold_5_mRNA_261.1           | -                            | -                               |
| GF0030095 | 1                            | 0                         | 0                            | 0 Hypothetical protein (1)                                         |                                                                                                                                                                                                                                           | Leucine-rich repeat domain, L domain-like [IPR032675] (1)                                                                                                                                                                                              | scaffold_5_mRNA_2608.1          | -                            | -                               |
| GF0030094 | 1                            | 0                         | 0                            | 0 Hypothetical protein (1)                                         |                                                                                                                                                                                                                                           | Transposase, MuDR, plant [IPR004332] (1)                                                                                                                                                                                                               | scaffold_5_mRNA_2604.1          | -                            | -                               |
| GF0030093 | 1                            | 0                         | 0                            | 0 Hypothetical protein (1)                                         |                                                                                                                                                                                                                                           | Leucine-rich repeat domain, L domain-like [IPR032675] (1)                                                                                                                                                                                              | scaffold_5_mRNA_2596.1          | -                            | -                               |
| GF0030092 | 1                            | 0                         | 0                            | 0 Disease resistance protein (CC-NBS-LRR class) family protein (1) | ADP binding [GO:0043531 molecular_function] (1)                                                                                                                                                                                           | Leucine-rich repeat domain, L domain-like [IPR032675] (1); Winged helix-turn-helix DNA-binding domain [IPR011991] (1); NB-ARC [IPR002182] (1); P-loop containing nucleoside triphosphate hydrolase [IPR027417] (1)                                     | scaffold_5_mRNA_2594.1          | -                            | -                               |
| GF0030091 | 1                            | 0                         | 0                            | 0 Hypothetical protein (1)                                         |                                                                                                                                                                                                                                           |                                                                                                                                                                                                                                                        | scaffold_5_mRNA_2593.1          | -                            | -                               |
| GF0030090 | 1                            | 0                         | 0                            | 0 Disease resistance protein (CC-NBS-LRR class) family protein (1) | ADP binding [GO:0043531 molecular_function] (1)                                                                                                                                                                                           | NB-ARC [IPR002182] (1); AAA+ ATPase domain [IPR003593] (1); P-loop containing nucleoside triphosphate hydrolase [IPR027417] (1); Leucine-rich repeat domain, L domain-like [IPR032675] (1); Winged helix-turn-helix DNA-binding domain [IPR011991] (1) | scaffold_5_mRNA_2591.1          | -                            | -                               |
| GF0030089 | 1                            | 0                         | 0                            | 0 Hypothetical protein (1)                                         |                                                                                                                                                                                                                                           |                                                                                                                                                                                                                                                        | scaffold_5_mRNA_2588.1          | -                            | -                               |
| GF0030088 | 1                            | 0                         | 0                            | 0 Hypothetical protein (1)                                         |                                                                                                                                                                                                                                           |                                                                                                                                                                                                                                                        | scaffold_5_mRNA_2580.1          | -                            | -                               |
| GF0030087 | 1                            | 0                         | 0                            | 0 Hypothetical protein (1)                                         |                                                                                                                                                                                                                                           |                                                                                                                                                                                                                                                        | scaffold_5_mRNA_2577.1          | -                            | -                               |
| GF0030086 | 1                            | 0                         | 0                            | 0 Hypothetical protein (1)                                         |                                                                                                                                                                                                                                           |                                                                                                                                                                                                                                                        | scaffold_5_mRNA_2574.1          | -                            | -                               |
| GF0030085 | 1                            | 0                         | 0                            | 0 Hypothetical protein (1)                                         |                                                                                                                                                                                                                                           |                                                                                                                                                                                                                                                        | scaffold_5_mRNA_2573.1          | -                            | -                               |
| GF0030084 | 1                            | 0                         | 0                            | 0 Hypothetical protein (1)                                         |                                                                                                                                                                                                                                           |                                                                                                                                                                                                                                                        | scaffold_5_mRNA_2572.1          | -                            | -                               |
| GF0030083 | 1                            | 0                         | 0                            | 0 Hypothetical protein (1)                                         |                                                                                                                                                                                                                                           |                                                                                                                                                                                                                                                        | scaffold_5_mRNA_2571.1          | -                            | -                               |
| GF0030082 | 1                            | 0                         | 0                            | 0 Hypothetical protein (1)                                         |                                                                                                                                                                                                                                           | Reverse transcriptase domain [IPR000477] (1)                                                                                                                                                                                                           | scaffold_5_mRNA_2570.1          | -                            | -                               |
| GF0030081 | 1                            | 0                         | 0                            | 0 Hypothetical protein (1)                                         |                                                                                                                                                                                                                                           |                                                                                                                                                                                                                                                        | scaffold_5_mRNA_2569.1          | -                            | -                               |
| GF0030080 | 1                            | 0                         | 0                            | 0 Hypothetical protein (1)                                         |                                                                                                                                                                                                                                           | Viral movement protein [IPR028919] (1)                                                                                                                                                                                                                 | scaffold_5_mRNA_2561.1          | -                            | -                               |
| GF0030079 | 1                            | 0                         | 0                            | 0 Hypothetical protein (1)                                         |                                                                                                                                                                                                                                           |                                                                                                                                                                                                                                                        | scaffold_5_mRNA_2559.1          | -                            | -                               |
| GF0030078 | 1                            | 0                         | 0                            | 0 Hypothetical protein (1)                                         |                                                                                                                                                                                                                                           |                                                                                                                                                                                                                                                        | scaffold_5_mRNA_2558.1          | -                            | -                               |
| GF0030077 | 1                            | 0                         | 0                            | 0 Hypothetical protein (1)                                         |                                                                                                                                                                                                                                           |                                                                                                                                                                                                                                                        | scaffold_5_mRNA_2553.1          | -                            | -                               |
| GF0030076 | 1                            | 0                         | 0                            | 0 Hypothetical protein (1)                                         |                                                                                                                                                                                                                                           |                                                                                                                                                                                                                                                        | scaffold_5_mRNA_255.1           | -                            | -                               |
| GF0030075 | 1                            | 0                         | 0                            | 0 Hypothetical protein (1)                                         |                                                                                                                                                                                                                                           |                                                                                                                                                                                                                                                        | scaffold_5_mRNA_2548.1          | -                            | -                               |
| GF0030074 | 1                            | 0                         | 0                            | 0 Hypothetical protein (1)                                         |                                                                                                                                                                                                                                           |                                                                                                                                                                                                                                                        | scaffold_5_mRNA_2544.1          | -                            | -                               |
| GF0030073 | 1                            | 0                         | 0                            | 0 Hypothetical protein (1)                                         |                                                                                                                                                                                                                                           |                                                                                                                                                                                                                                                        | scaffold_5_mRNA_254.1           | -                            | -                               |
| GF0030072 | 1                            | 0                         | 0                            | 0 Actin (1)                                                        |                                                                                                                                                                                                                                           | Actin/actin-like conserved site [IPR020902] (1); Actin, conserved site [IPR004001] (1); Actin family [IPR004000] (1)                                                                                                                                   | scaffold_5_mRNA_2537.1          | -                            | -                               |
| GF0030071 | 1                            | 0                         | 0                            | 0 Hypothetical protein (1)                                         |                                                                                                                                                                                                                                           |                                                                                                                                                                                                                                                        | scaffold_5_mRNA_2533.1          | -                            | -                               |
| GF0030070 | 1                            | 0                         | 0                            | 0 Hypothetical protein (1)                                         |                                                                                                                                                                                                                                           |                                                                                                                                                                                                                                                        | scaffold_5_mRNA_2530.1          | -                            | -                               |
| GF0030069 | 1                            | 0                         | 0                            | 0 Hypothetical protein (1)                                         |                                                                                                                                                                                                                                           |                                                                                                                                                                                                                                                        | scaffold_5_mRNA_2528.1          | -                            | -                               |
| GF0030068 | 1                            | 0                         | 0                            | 0 Hypothetical protein (1)                                         |                                                                                                                                                                                                                                           |                                                                                                                                                                                                                                                        | scaffold_5_mRNA_2523.1          | -                            | -                               |
| GF0030067 | 1                            | 0                         | 0                            | 0 Hypothetical protein (1)                                         |                                                                                                                                                                                                                                           |                                                                                                                                                                                                                                                        | scaffold_5_mRNA_2522.1          | -                            | -                               |
| GF0030066 | 1                            | 0                         | 0                            | 0 Hypothetical protein (1)                                         |                                                                                                                                                                                                                                           |                                                                                                                                                                                                                                                        | scaffold_5_mRNA_252.1           | -                            | -                               |
| GF0030065 | 1                            | 0                         | 0                            | 0 Hypothetical protein (1)                                         | ribosome [GO:0005840 cellular_component] (1); structural constituent of ribosome [GO:0003735 molecular_function] (1); translation [GO:0006412 biological_process] (1)                                                                     | Ribosomal S11, conserved site [IPR018102] (1); Ribosomal protein S11 [IPR001971] (1); Reverse transcriptase domain [IPR000477] (1)                                                                                                                     | scaffold_5_mRNA_2519.1          | -                            | -                               |
| GF0030064 | 1                            | 0                         | 0                            | 0 Hypothetical protein (1)                                         |                                                                                                                                                                                                                                           | Reverse transcriptase domain [IPR000477] (1)                                                                                                                                                                                                           | scaffold_5_mRNA_2514.1          | -                            | -                               |
| GF0030063 | 1                            | 0                         | 0                            | 0 Hypothetical protein (1)                                         |                                                                                                                                                                                                                                           |                                                                                                                                                                                                                                                        | scaffold_5_mRNA_2507.1          | -                            | -                               |
| GF0030062 | 1                            | 0                         | 0                            | 0 Hypothetical protein (1)                                         | nucleic acid binding [GO:0003676 molecular_function] (1); zinc ion binding [GO:0008270 molecular_function] (1)                                                                                                                            | Zinc finger, CCHC-type [IPR01878] (1)                                                                                                                                                                                                                  | scaffold_5_mRNA_2504.1          | -                            | -                               |
| GF0030061 | 1                            | 0                         | 0                            | 0 Hypothetical protein (1)                                         |                                                                                                                                                                                                                                           |                                                                                                                                                                                                                                                        | scaffold_5_mRNA_2502.1          | -                            | -                               |
| GF0030060 | 1                            | 0                         | 0                            | 0 Hypothetical protein (1)                                         |                                                                                                                                                                                                                                           | Viral movement protein [IPR028919] (1)                                                                                                                                                                                                                 | scaffold_5_mRNA_2500.1          | -                            | -                               |
| GF0030059 | 1                            | 0                         | 0                            | 0 Hypothetical protein (1)                                         |                                                                                                                                                                                                                                           |                                                                                                                                                                                                                                                        | scaffold_5_mRNA_2499.1          | -                            | -                               |
| GF0030058 | 1                            | 0                         | 0                            | 0 Hypothetical protein (1)                                         |                                                                                                                                                                                                                                           | Viral movement protein [IPR028919] (1)                                                                                                                                                                                                                 | scaffold_5_mRNA_2498.1          | -                            | -                               |
| GF0030057 | 1                            | 0                         | 0                            | 0 Hypothetical protein (1)                                         |                                                                                                                                                                                                                                           |                                                                                                                                                                                                                                                        | scaffold_5_mRNA_2495.1          | -                            | -                               |
| GF0030056 | 1                            | 0                         | 0                            | 0 Hypothetical protein (1)                                         | zinc ion binding [GO:0008270 molecular_function] (1); aspartic-type endopeptidase activity [GO:0004190 molecular_function] (1); nucleic acid binding [GO:0003676 molecular_function] (1); proteolysis [GO:0006508 biological_process] (1) | Ribosomal S11, conserved site [IPR018102] (1); Aspartic-type endopeptidase, active site [IPR001969] (1); Zinc finger, CCHC-type [IPR01878] (1)                                                                                                         | scaffold_5_mRNA_2492.1          | -                            | -                               |
| GF0030055 | 1                            | 0                         | 0                            | 0 Hypothetical protein (1)                                         | protein binding [GO:0005515 molecular_function] (1)                                                                                                                                                                                       | Innate immunity-like domain [IPR007110] (1)                                                                                                                                                                                                            | scaffold_5_mRNA_2490.1          | -                            | -                               |

| ID        | Num. in <i>C. caryophyllae</i> | Num. in <i>C. uchiha</i> | Num. in <i>P. trifoliata</i> | Note                                                           | GO                                                                                                                                                                                                                                           | InterPro                                                                                                                                                                                                                                    | Members in <i>C. caryophyllae</i> | Members in <i>C. uchiha</i> | Members in <i>P. trifoliata</i> |
|-----------|--------------------------------|--------------------------|------------------------------|----------------------------------------------------------------|----------------------------------------------------------------------------------------------------------------------------------------------------------------------------------------------------------------------------------------------|---------------------------------------------------------------------------------------------------------------------------------------------------------------------------------------------------------------------------------------------|-----------------------------------|-----------------------------|---------------------------------|
| GF0030054 | 1                              | 0                        | 0                            | 0 Hypothetical protein (1)                                     |                                                                                                                                                                                                                                              | Viral movement protein [IPR028919] (1)                                                                                                                                                                                                      | scaffold_5_mRNA_2488.1            | -                           | -                               |
| GF0030053 | 1                              | 0                        | 0                            | 0 Hypothetical protein (1)                                     |                                                                                                                                                                                                                                              |                                                                                                                                                                                                                                             | scaffold_5_mRNA_2487.1            | -                           | -                               |
| GF0030052 | 1                              | 0                        | 0                            | 0 Hypothetical protein (1)                                     | nucleic acid binding [GO:0003676]<br>molecular_function (1); DNA integration [GO:0015074 biological_process] (1)                                                                                                                             | Ribonuclease H-like domain [IPR012337] (1); Integrase, catalytic core [IPR01584] (1)                                                                                                                                                        | scaffold_5_mRNA_2485.1            | -                           | -                               |
| GF0030051 | 1                              | 0                        | 0                            | 0 Hypothetical protein (1)                                     |                                                                                                                                                                                                                                              |                                                                                                                                                                                                                                             | scaffold_5_mRNA_2481.1            | -                           | -                               |
| GF0030050 | 1                              | 0                        | 0                            | 0 Hypothetical protein (1)                                     |                                                                                                                                                                                                                                              |                                                                                                                                                                                                                                             | scaffold_5_mRNA_248.1             | -                           | -                               |
| GF0030049 | 1                              | 0                        | 0                            | 0 Hypothetical protein (1)                                     |                                                                                                                                                                                                                                              | Reverse transcriptase domain [IPR000477] (1)                                                                                                                                                                                                | scaffold_5_mRNA_2478.1            | -                           | -                               |
| GF0030048 | 1                              | 0                        | 0                            | 0 Hypothetical protein (1)                                     |                                                                                                                                                                                                                                              |                                                                                                                                                                                                                                             | scaffold_5_mRNA_2477.1            | -                           | -                               |
| GF0030047 | 1                              | 0                        | 0                            | 0 Hypothetical protein (1)                                     |                                                                                                                                                                                                                                              |                                                                                                                                                                                                                                             | scaffold_5_mRNA_2473.1            | -                           | -                               |
| GF0030046 | 1                              | 0                        | 0                            | 0 DNA (Cytosine-5) methyltransferase (1)                       | chromatin binding [GO:0003682]<br>molecular_function (1); DNA integration [GO:0008168 biological_process] (1); methyltransferase activity [GO:0008168 molecular_function] (1)                                                                | C-5 cytosine methyltransferase [IPR001525] (1); S-adenosyl-L-methionine-dependent methyltransferase [IPR029063] (1); Bromo adjacent homology (BAH) domain [IPR01025] (1); DNA methylase, C-5 cytosine-specific, active site [IPR018117] (1) | scaffold_5_mRNA_247.1             | -                           | -                               |
| GF0030045 | 1                              | 0                        | 0                            | 0 Hypothetical protein (1)                                     |                                                                                                                                                                                                                                              |                                                                                                                                                                                                                                             | scaffold_5_mRNA_2469.1            | -                           | -                               |
| GF0030044 | 1                              | 0                        | 0                            | 0 Hypothetical protein (1)                                     |                                                                                                                                                                                                                                              |                                                                                                                                                                                                                                             | scaffold_5_mRNA_2468.1            | -                           | -                               |
| GF0030043 | 1                              | 0                        | 0                            | 0 Cytokinin riboside 5'-monophosphate phosphoribohydrolase (1) |                                                                                                                                                                                                                                              | LOG family [IPR031100] (1)                                                                                                                                                                                                                  | scaffold_5_mRNA_2467.1            | -                           | -                               |
| GF0030042 | 1                              | 0                        | 0                            | 0 Hypothetical protein (1)                                     |                                                                                                                                                                                                                                              |                                                                                                                                                                                                                                             | scaffold_5_mRNA_246.1             | -                           | -                               |
| GF0030041 | 1                              | 0                        | 0                            | 0 Cytokinin riboside 5'-monophosphate phosphoribohydrolase (1) |                                                                                                                                                                                                                                              |                                                                                                                                                                                                                                             | scaffold_5_mRNA_2456.1            | -                           | -                               |
| GF0030040 | 1                              | 0                        | 0                            | 0 Cytokinin riboside 5'-monophosphate phosphoribohydrolase (1) |                                                                                                                                                                                                                                              | LOG family [IPR031100] (1)                                                                                                                                                                                                                  | scaffold_5_mRNA_2451.1            | -                           | -                               |
| GF0030039 | 1                              | 0                        | 0                            | 0 Hypothetical protein (1)                                     |                                                                                                                                                                                                                                              |                                                                                                                                                                                                                                             | scaffold_5_mRNA_2450.1            | -                           | -                               |
| GF0030038 | 1                              | 0                        | 0                            | 0 Hypothetical protein (1)                                     | ADP binding [GO:0043531]<br>molecular_function (1)                                                                                                                                                                                           | Leucine-rich repeat domain, L domain-like [IPR032675] (1); DNA (cytosine-5)-methyltransferase 1, replication foci domain [IPR022702] (1); P-loop containing nucleoside triphosphate hydrolase [IPR027417] (1); NB-ARC [IPR02182] (1)        | scaffold_5_mRNA_245.1             | -                           | -                               |
| GF0030037 | 1                              | 0                        | 0                            | 0 Hypothetical protein (1)                                     |                                                                                                                                                                                                                                              |                                                                                                                                                                                                                                             | scaffold_5_mRNA_2448.1            | -                           | -                               |
| GF0030036 | 1                              | 0                        | 0                            | 0 Hypothetical protein (1)                                     |                                                                                                                                                                                                                                              |                                                                                                                                                                                                                                             | scaffold_5_mRNA_2446.1            | -                           | -                               |
| GF0030035 | 1                              | 0                        | 0                            | 0 Hypothetical protein (1)                                     |                                                                                                                                                                                                                                              |                                                                                                                                                                                                                                             | scaffold_5_mRNA_2444.1            | -                           | -                               |
| GF0030034 | 1                              | 0                        | 0                            | 0 Hypothetical protein (1)                                     |                                                                                                                                                                                                                                              |                                                                                                                                                                                                                                             | scaffold_5_mRNA_2443.1            | -                           | -                               |
| GF0030033 | 1                              | 0                        | 0                            | 0 Hypothetical protein (1)                                     |                                                                                                                                                                                                                                              | LOG family [IPR031100] (1)                                                                                                                                                                                                                  | scaffold_5_mRNA_2442.1            | -                           | -                               |
| GF0030032 | 1                              | 0                        | 0                            | 0 Hypothetical protein (1)                                     |                                                                                                                                                                                                                                              |                                                                                                                                                                                                                                             | scaffold_5_mRNA_2440.1            | -                           | -                               |
| GF0030031 | 1                              | 0                        | 0                            | 0 Hypothetical protein (1)                                     | ADP binding [GO:0043531]<br>molecular_function (1)                                                                                                                                                                                           | P-loop containing nucleoside triphosphate hydrolase [IPR027417] (1); DNA (cytosine-5)-methyltransferase 1, replication foci domain [IPR022702] (1); Leucine-rich repeat domain, L domain-like [IPR032675] (1)                               | scaffold_5_mRNA_244.1             | -                           | -                               |
| GF0030030 | 1                              | 0                        | 0                            | 0 Cytokinin riboside 5'-monophosphate phosphoribohydrolase (1) |                                                                                                                                                                                                                                              | LOG family [IPR031100] (1); Cytokinin riboside 5'-monophosphate phosphoribohydrolase LOG [IPR005269] (1)                                                                                                                                    | scaffold_5_mRNA_2439.1            | -                           | -                               |
| GF0030029 | 1                              | 0                        | 0                            | 0 Hypothetical protein (1)                                     |                                                                                                                                                                                                                                              |                                                                                                                                                                                                                                             | scaffold_5_mRNA_2435.1            | -                           | -                               |
| GF0030028 | 1                              | 0                        | 0                            | 0 Cytokinin riboside 5'-monophosphate phosphoribohydrolase (1) |                                                                                                                                                                                                                                              | Cytokinin riboside 5'-monophosphate phosphoribohydrolase LOG [IPR005269] (1); LOG family [IPR031100] (1)                                                                                                                                    | scaffold_5_mRNA_2430.1            | -                           | -                               |
| GF0030027 | 1                              | 0                        | 0                            | 0 Hypothetical protein (1)                                     |                                                                                                                                                                                                                                              |                                                                                                                                                                                                                                             | scaffold_5_mRNA_2429.1            | -                           | -                               |
| GF0030026 | 1                              | 0                        | 0                            | 0 Hypothetical protein (1)                                     |                                                                                                                                                                                                                                              |                                                                                                                                                                                                                                             | scaffold_5_mRNA_2427.1            | -                           | -                               |
| GF0030025 | 1                              | 0                        | 0                            | 0 Cytokinin riboside 5'-monophosphate phosphoribohydrolase (1) |                                                                                                                                                                                                                                              | LOG family [IPR031100] (1)                                                                                                                                                                                                                  | scaffold_5_mRNA_2424.1            | -                           | -                               |
| GF0030024 | 1                              | 0                        | 0                            | 0 Cysteine-rich RLK (RECEPTOR-like protein kinase) 8 (1)       |                                                                                                                                                                                                                                              |                                                                                                                                                                                                                                             | scaffold_5_mRNA_2422.1            | -                           | -                               |
| GF0030023 | 1                              | 0                        | 0                            | 0 Hypothetical protein (1)                                     |                                                                                                                                                                                                                                              |                                                                                                                                                                                                                                             | scaffold_5_mRNA_2421.1            | -                           | -                               |
| GF0030022 | 1                              | 0                        | 0                            | 0 Hypothetical protein (1)                                     |                                                                                                                                                                                                                                              |                                                                                                                                                                                                                                             | scaffold_5_mRNA_2415.1            | -                           | -                               |
| GF0030021 | 1                              | 0                        | 0                            | 0 Hypothetical protein (1)                                     |                                                                                                                                                                                                                                              |                                                                                                                                                                                                                                             | scaffold_5_mRNA_2411.1            | -                           | -                               |
| GF0030020 | 1                              | 0                        | 0                            | 0 Hypothetical protein (1)                                     |                                                                                                                                                                                                                                              |                                                                                                                                                                                                                                             | scaffold_5_mRNA_241.1             | -                           | -                               |
| GF0030019 | 1                              | 0                        | 0                            | 0 Hypothetical protein (1)                                     | response to oxidative stress [GO:0006979 biological_process] (1); heme binding [GO:0020037 molecular_function] (1); peroxidase activity [GO:0004601 molecular_function] (1); oxidation-reduction process [GO:0055114 biological_process] (1) | Haem peroxidase, plant/fungal/bacterial [IPR02016] (1); Plant peroxidase [IPR000823] (1); Haem peroxidase [IPR010255] (1)                                                                                                                   | scaffold_5_mRNA_2409.1            | -                           | -                               |
| GF0030018 | 1                              | 0                        | 0                            | 0 Hypothetical protein (1)                                     |                                                                                                                                                                                                                                              | Ribonuclease H-like domain [IPR012337] (1)                                                                                                                                                                                                  | scaffold_5_mRNA_2408.1            | -                           | -                               |
| GF0030017 | 1                              | 0                        | 0                            | 0 Hypothetical protein (1)                                     |                                                                                                                                                                                                                                              | Chromo domain-like [IPR016197] (1); Chromo domain [IPR023780] (1)                                                                                                                                                                           | scaffold_5_mRNA_2402.1            | -                           | -                               |
| GF0030016 | 1                              | 0                        | 0                            | 0 Retrotransposon protein, putative, Ty3-gypsy subclass (1)    |                                                                                                                                                                                                                                              | Aspartic peptidase domain [IPR021109] (1); Retrotransposon gag domain [IPR005162] (1)                                                                                                                                                       | scaffold_5_mRNA_240.1             | -                           | -                               |
| GF0030015 | 1                              | 0                        | 0                            | 0 Cytokinin riboside 5'-monophosphate phosphoribohydrolase (1) |                                                                                                                                                                                                                                              |                                                                                                                                                                                                                                             | scaffold_5_mRNA_2397.1            | -                           | -                               |
| GF0030014 | 1                              | 0                        | 0                            | 0 Hypothetical protein (1)                                     |                                                                                                                                                                                                                                              |                                                                                                                                                                                                                                             | scaffold_5_mRNA_2396.1            | -                           | -                               |
| GF0030013 | 1                              | 0                        | 0                            | 0 Hypothetical protein (1)                                     |                                                                                                                                                                                                                                              |                                                                                                                                                                                                                                             | scaffold_5_mRNA_239.1             | -                           | -                               |
| GF0030012 | 1                              | 0                        | 0                            | 0 DNA (Cytosine-5)-methyltransferase CMT2 (1)                  | methyltransferase activity [GO:0008168 molecular_function] (1)                                                                                                                                                                               | S-adenosyl-L-methionine-dependent methyltransferase [IPR029063] (1); C-5 cytosine methyltransferase [IPR001525] (1); DNA methylase, C-5 cytosine-specific, active site [IPR018117] (1)                                                      | scaffold_5_mRNA_238.1             | -                           | -                               |
| GF0030011 | 1                              | 0                        | 0                            | 0 Hypothetical protein (1)                                     |                                                                                                                                                                                                                                              |                                                                                                                                                                                                                                             | scaffold_5_mRNA_237.1             | -                           | -                               |
| GF0030010 | 1                              | 0                        | 0                            | 0 Hypothetical protein (1)                                     |                                                                                                                                                                                                                                              |                                                                                                                                                                                                                                             | scaffold_5_mRNA_2366.1            | -                           | -                               |
| GF0030009 | 1                              | 0                        | 0                            | 0 Hypothetical protein (1)                                     |                                                                                                                                                                                                                                              |                                                                                                                                                                                                                                             | scaffold_5_mRNA_2362.1            | -                           | -                               |
| GF0030008 | 1                              | 0                        | 0                            | 0 Hypothetical protein (1)                                     |                                                                                                                                                                                                                                              |                                                                                                                                                                                                                                             | scaffold_5_mRNA_2360.1            | -                           | -                               |
| GF0030007 | 1                              | 0                        | 0                            | 0 Hypothetical protein (1)                                     |                                                                                                                                                                                                                                              | S-adenosyl-L-methionine-dependent methyltransferase [IPR029063] (1); DNA (cytosine-5)-methyltransferase 1, replication foci domain [IPR022702] (1)                                                                                          | scaffold_5_mRNA_236.1             | -                           | -                               |
| GF0030006 | 1                              | 0                        | 0                            | 0 Hypothetical protein (1)                                     |                                                                                                                                                                                                                                              |                                                                                                                                                                                                                                             | scaffold_5_mRNA_2356.1            | -                           | -                               |
| GF0030005 | 1                              | 0                        | 0                            | 0 Hypothetical protein (1)                                     |                                                                                                                                                                                                                                              |                                                                                                                                                                                                                                             | scaffold_5_mRNA_2355.1            | -                           | -                               |
| GF0030004 | 1                              | 0                        | 0                            | 0 Hypothetical protein (1)                                     |                                                                                                                                                                                                                                              |                                                                                                                                                                                                                                             | scaffold_5_mRNA_2353.1            | -                           | -                               |
| GF0030003 | 1                              | 0                        | 0                            | 0 Hypothetical protein (1)                                     | transcription, DNA-templated [GO:0006351 biological_process] (1)                                                                                                                                                                             | Transcription elongation factor S-II, central domain [IPR003618] (1)                                                                                                                                                                        | scaffold_5_mRNA_2350.1            | -                           | -                               |
| GF0030002 | 1                              | 0                        | 0                            | 0 Hypothetical protein (1)                                     |                                                                                                                                                                                                                                              |                                                                                                                                                                                                                                             | scaffold_5_mRNA_2348.1            | -                           | -                               |
| GF0030001 | 1                              | 0                        | 0                            | 0 Hypothetical protein (1)                                     |                                                                                                                                                                                                                                              |                                                                                                                                                                                                                                             | scaffold_5_mRNA_2342.1            | -                           | -                               |
| GF0030000 | 1                              | 0                        | 0                            | 0 Hypothetical protein (1)                                     |                                                                                                                                                                                                                                              |                                                                                                                                                                                                                                             | scaffold_5_mRNA_2335.1            | -                           | -                               |
| GF0029999 | 1                              | 0                        | 0                            | 0 Hypothetical protein (1)                                     |                                                                                                                                                                                                                                              |                                                                                                                                                                                                                                             | scaffold_5_mRNA_2334.1            | -                           | -                               |
| GF0029998 | 1                              | 0                        | 0                            | 0 Hypothetical protein (1)                                     |                                                                                                                                                                                                                                              |                                                                                                                                                                                                                                             | scaffold_5_mRNA_2331.1            | -                           | -                               |
| GF0029997 | 1                              | 0                        | 0                            | 0 Auxin-responsive GH3 family protein (1)                      |                                                                                                                                                                                                                                              | GH3 family [IPR004993] (1)                                                                                                                                                                                                                  | scaffold_5_mRNA_2328.1            | -                           | -                               |
| GF0029996 | 1                              | 0                        | 0                            | 0 Hypothetical protein (1)                                     |                                                                                                                                                                                                                                              | CTLH, C-terminal LisH motif [IPR006995] (1)                                                                                                                                                                                                 | scaffold_5_mRNA_2325.1            | -                           | -                               |
| GF0029995 | 1                              | 0                        | 0                            | 0 Hypothetical protein (1)                                     |                                                                                                                                                                                                                                              |                                                                                                                                                                                                                                             | scaffold_5_mRNA_2324.1            | -                           | -                               |
| GF0029994 | 1                              | 0                        | 0                            | 0 Hypothetical protein (1)                                     |                                                                                                                                                                                                                                              |                                                                                                                                                                                                                                             | scaffold_5_mRNA_2320.1            | -                           | -                               |
| GF0029993 | 1                              | 0                        | 0                            | 0 Hypothetical protein (1)                                     |                                                                                                                                                                                                                                              |                                                                                                                                                                                                                                             | scaffold_5_mRNA_2319.1            | -                           | -                               |
| GF0029992 | 1                              | 0                        | 0                            | 0 Hypothetical protein (1)                                     |                                                                                                                                                                                                                                              | Retrotransposon gag domain [IPR005162] (1)                                                                                                                                                                                                  | scaffold_5_mRNA_2313.1            | -                           | -                               |
| GF0029991 | 1                              | 0                        | 0                            | 0 Hypothetical protein (1)                                     | nucleic acid binding [GO:0003676]<br>molecular_function (1)                                                                                                                                                                                  | Domain of unknown function DUF4371 [IPR02598] (1); Ribonuclease H-like domain [IPR012337] (1)                                                                                                                                               | scaffold_5_mRNA_2310.1            | -                           | -                               |
| GF0029990 | 1                              | 0                        | 0                            | 0 Hypothetical protein (1)                                     |                                                                                                                                                                                                                                              |                                                                                                                                                                                                                                             | scaffold_5_mRNA_2306.1            | -                           | -                               |
| GF0029989 | 1                              | 0                        | 0                            | 0 Hypothetical protein (1)                                     | DNA binding [GO:0003677 molecular_function] (1); protein dimerization activity [GO:0046983 molecular_function] (1); nucleic acid binding [GO:0003676 molecular_function] (1)                                                                 | Ribonuclease H-like domain [IPR012337] (1); Zinc finger C2H2-type [IPR013087] (1); Zinc finger, HED-type [IPR036356] (1); HAT, C-terminal dimerisation domain [IPR008906] (1)                                                               | scaffold_5_mRNA_2304.1            | -                           | -                               |
| GF0029988 | 1                              | 0                        | 0                            | 0 Hypothetical protein (1)                                     |                                                                                                                                                                                                                                              |                                                                                                                                                                                                                                             | scaffold_5_mRNA_230.1             | -                           | -                               |
| GF0029987 | 1                              | 0                        | 0                            | 0 Hypothetical protein (1)                                     |                                                                                                                                                                                                                                              |                                                                                                                                                                                                                                             | scaffold_5_mRNA_2299.1            | -                           | -                               |
| GF0029986 | 1                              | 0                        | 0                            | 0 Hypothetical protein (1)                                     | nucleic acid binding [GO:0003676 molecular_function] (1); regulation of transcription, DNA-templated [GO:0006355 biological_process] (1)                                                                                                     | Carlavirus nucleic acid-binding protein [IPR002568] (1)                                                                                                                                                                                     | scaffold_5_mRNA_2298.1            | -                           | -                               |
| GF0029985 | 1                              | 0                        | 0                            | 0 Cytokinin riboside 5'-monophosphate phosphoribohydrolase (1) |                                                                                                                                                                                                                                              | LOG family [IPR031100] (1)                                                                                                                                                                                                                  | scaffold_5_mRNA_2297.1            | -                           | -                               |
| GF0029984 | 1                              | 0                        | 0                            | 0 Hypothetical protein (1)                                     |                                                                                                                                                                                                                                              |                                                                                                                                                                                                                                             | scaffold_5_mRNA_2296.1            | -                           | -                               |
| GF0029983 | 1                              | 0                        | 0                            | 0 Hypothetical protein (1)                                     |                                                                                                                                                                                                                                              |                                                                                                                                                                                                                                             | scaffold_5_mRNA_2295.1            | -                           | -                               |
| GF0029982 | 1                              | 0                        | 0                            | 0 Hypothetical protein (1)                                     |                                                                                                                                                                                                                                              |                                                                                                                                                                                                                                             | scaffold_5_mRNA_2291.1            | -                           | -                               |
| GF0029981 | 1                              | 0                        | 0                            | 0 Hypothetical protein (1)                                     |                                                                                                                                                                                                                                              |                                                                                                                                                                                                                                             | scaffold_5_mRNA_229.1             | -                           | -                               |
| GF0029980 | 1                              | 0                        | 0                            | 0 Hypothetical protein (1)                                     |                                                                                                                                                                                                                                              |                                                                                                                                                                                                                                             | scaffold_5_mRNA_2285.1            | -                           | -                               |
| GF0029979 | 1                              | 0                        | 0                            | 0 Hypothetical protein (1)                                     |                                                                                                                                                                                                                                              |                                                                                                                                                                                                                                             | scaffold_5_mRNA_2283.1            | -                           | -                               |

| ID        | Num. in <i>C. clementinae</i> | Num. in <i>C. uchiha</i> | Num. in <i>P. trifoliata</i> | Note                                                                | GO                                                                                                                                                                                                                                                        | InterPro                                                                                                                                                                                                                                             | Members in <i>C. clementinae</i> | Members in <i>C. uchiha</i> | Members in <i>P. trifoliata</i> |
|-----------|-------------------------------|--------------------------|------------------------------|---------------------------------------------------------------------|-----------------------------------------------------------------------------------------------------------------------------------------------------------------------------------------------------------------------------------------------------------|------------------------------------------------------------------------------------------------------------------------------------------------------------------------------------------------------------------------------------------------------|----------------------------------|-----------------------------|---------------------------------|
| GF0029978 | 1                             | 0                        | 0                            | 0 Hypothetical protein (1)                                          |                                                                                                                                                                                                                                                           |                                                                                                                                                                                                                                                      | scaffold_5_mRNA_2282.1           | -                           | -                               |
| GF0029977 | 1                             | 0                        | 0                            | 0 Hypothetical protein (1)                                          | nucleic acid binding [GO:0003676]<br>molecular_function (1); zinc ion binding [GO:0008270 molecular_function] (1)                                                                                                                                         | Zinc finger, CCHC-type [IPR001878] (1)                                                                                                                                                                                                               | scaffold_5_mRNA_2276.1           | -                           | -                               |
| GF0029976 | 1                             | 0                        | 0                            | 0 Hypothetical protein (1)                                          |                                                                                                                                                                                                                                                           |                                                                                                                                                                                                                                                      | scaffold_5_mRNA_2268.1           | -                           | -                               |
| GF0029975 | 1                             | 0                        | 0                            | 0 Hypothetical protein (1)                                          |                                                                                                                                                                                                                                                           |                                                                                                                                                                                                                                                      | scaffold_5_mRNA_2264.1           | -                           | -                               |
| GF0029974 | 1                             | 0                        | 0                            | 0 Hypothetical protein (1)                                          |                                                                                                                                                                                                                                                           |                                                                                                                                                                                                                                                      | scaffold_5_mRNA_2259.1           | -                           | -                               |
| GF0029973 | 1                             | 0                        | 0                            | 0 Hypothetical protein (1)                                          |                                                                                                                                                                                                                                                           |                                                                                                                                                                                                                                                      | scaffold_5_mRNA_2255.1           | -                           | -                               |
| GF0029972 | 1                             | 0                        | 0                            | 0 Verticillium wilt resistance-like protein (1)                     | protein binding [GO:0005515]<br>molecular_function (1)                                                                                                                                                                                                    | Leucine-rich repeat, typical subtype [IPR003591] (1); Leucine-rich repeat domain, L domain-like [IPR032675] (1); Leucine-rich repeat [IPR001611] (1); Leucine-rich repeat-containing N-terminal, plant-type [IPR013210] (1)                          | scaffold_5_mRNA_2250.1           | -                           | -                               |
| GF0029971 | 1                             | 0                        | 0                            | 0 Hypothetical protein (1)                                          |                                                                                                                                                                                                                                                           |                                                                                                                                                                                                                                                      | scaffold_5_mRNA_225.1            | -                           | -                               |
| GF0029970 | 1                             | 0                        | 0                            | 0 Hypothetical protein (1)                                          |                                                                                                                                                                                                                                                           |                                                                                                                                                                                                                                                      | scaffold_5_mRNA_2249.1           | -                           | -                               |
| GF0029969 | 1                             | 0                        | 0                            | 0 Leucine-rich repeat, plant specific (1)                           | protein binding [GO:0005515]<br>molecular_function (1)                                                                                                                                                                                                    | Leucine-rich repeat-containing N-terminal, plant-type [IPR013210] (1); Leucine-rich repeat [IPR001611] (1); Leucine-rich repeat, typical subtype [IPR003591] (1); Leucine-rich repeat domain, L domain-like [IPR032675] (1)                          | scaffold_5_mRNA_2245.1           | -                           | -                               |
| GF0029968 | 1                             | 0                        | 0                            | 0 Hypothetical protein (1)                                          |                                                                                                                                                                                                                                                           |                                                                                                                                                                                                                                                      | scaffold_5_mRNA_2242.1           | -                           | -                               |
| GF0029967 | 1                             | 0                        | 0                            | 0 Hypothetical protein (1)                                          |                                                                                                                                                                                                                                                           |                                                                                                                                                                                                                                                      | scaffold_5_mRNA_224.1            | -                           | -                               |
| GF0029966 | 1                             | 0                        | 0                            | 0 Putative leucine-rich repeat disease resistance protein (1)       | protein binding [GO:0005515]<br>molecular_function (1)                                                                                                                                                                                                    | Leucine-rich repeat, typical subtype [IPR003591] (1); Leucine-rich repeat domain, L domain-like [IPR032675] (1); Leucine-rich repeat-containing N-terminal, plant-type [IPR013210] (1); Leucine-rich repeat [IPR001611] (1)                          | scaffold_5_mRNA_2239.1           | -                           | -                               |
| GF0029965 | 1                             | 0                        | 0                            | 0 Hypothetical protein (1)                                          | protein binding [GO:0005515]<br>molecular_function (1)                                                                                                                                                                                                    | Leucine-rich repeat domain, L domain-like [IPR032675] (1); Leucine-rich repeat [IPR001611] (1)                                                                                                                                                       | scaffold_5_mRNA_2235.1           | -                           | -                               |
| GF0029964 | 1                             | 0                        | 0                            | 0 Hypothetical protein (1)                                          |                                                                                                                                                                                                                                                           |                                                                                                                                                                                                                                                      | scaffold_5_mRNA_2234.1           | -                           | -                               |
| GF0029963 | 1                             | 0                        | 0                            | 0 Hypothetical protein (1)                                          |                                                                                                                                                                                                                                                           |                                                                                                                                                                                                                                                      | scaffold_5_mRNA_2233.1           | -                           | -                               |
| GF0029962 | 1                             | 0                        | 0                            | 0 Hypothetical protein (1)                                          |                                                                                                                                                                                                                                                           |                                                                                                                                                                                                                                                      | scaffold_5_mRNA_2231.1           | -                           | -                               |
| GF0029961 | 1                             | 0                        | 0                            | 0 Hypothetical protein (1)                                          |                                                                                                                                                                                                                                                           |                                                                                                                                                                                                                                                      | scaffold_5_mRNA_2229.1           | -                           | -                               |
| GF0029960 | 1                             | 0                        | 0                            | 0 Hypothetical protein (1)                                          |                                                                                                                                                                                                                                                           |                                                                                                                                                                                                                                                      | scaffold_5_mRNA_2228.1           | -                           | -                               |
| GF0029959 | 1                             | 0                        | 0                            | 0 Hypothetical protein (1)                                          |                                                                                                                                                                                                                                                           |                                                                                                                                                                                                                                                      | scaffold_5_mRNA_2227.1           | -                           | -                               |
| GF0029958 | 1                             | 0                        | 0                            | 0 Hypothetical protein (1)                                          |                                                                                                                                                                                                                                                           |                                                                                                                                                                                                                                                      | scaffold_5_mRNA_2226.1           | -                           | -                               |
| GF0029957 | 1                             | 0                        | 0                            | 0 Hypothetical protein (1)                                          | zinc ion binding [GO:0008270]<br>molecular_function (1)                                                                                                                                                                                                   | Zinc finger, SWIM-type [IPR007527] (1); Nascent polypeptide-associated complex NAC domain [IPR002715] (1); Zinc finger, PNZ-type [IPR006564] (1); Nascent polypeptide-associated complex subunit alpha [IPR016641] (1)                               | scaffold_5_mRNA_2223.1           | -                           | -                               |
| GF0029956 | 1                             | 0                        | 0                            | 0 Hypothetical protein (1)                                          |                                                                                                                                                                                                                                                           |                                                                                                                                                                                                                                                      | scaffold_5_mRNA_222.1            | -                           | -                               |
| GF0029955 | 1                             | 0                        | 0                            | 0 Hypothetical protein (1)                                          |                                                                                                                                                                                                                                                           |                                                                                                                                                                                                                                                      | scaffold_5_mRNA_2216.1           | -                           | -                               |
| GF0029954 | 1                             | 0                        | 0                            | 0 Hypothetical protein (1)                                          |                                                                                                                                                                                                                                                           |                                                                                                                                                                                                                                                      | scaffold_5_mRNA_221.1            | -                           | -                               |
| GF0029953 | 1                             | 0                        | 0                            | 0 Hypothetical protein (1)                                          |                                                                                                                                                                                                                                                           |                                                                                                                                                                                                                                                      | scaffold_5_mRNA_2205.1           | -                           | -                               |
| GF0029952 | 1                             | 0                        | 0                            | 0 Hypothetical protein (1)                                          |                                                                                                                                                                                                                                                           |                                                                                                                                                                                                                                                      | scaffold_5_mRNA_2200.1           | -                           | -                               |
| GF0029951 | 1                             | 0                        | 0                            | 0 Hypothetical protein (1)                                          |                                                                                                                                                                                                                                                           |                                                                                                                                                                                                                                                      | scaffold_5_mRNA_220.1            | -                           | -                               |
| GF0029950 | 1                             | 0                        | 0                            | 0 Hypothetical protein (1)                                          |                                                                                                                                                                                                                                                           |                                                                                                                                                                                                                                                      | scaffold_5_mRNA_2198.1           | -                           | -                               |
| GF0029949 | 1                             | 0                        | 0                            | 0 Hypothetical protein (1)                                          |                                                                                                                                                                                                                                                           |                                                                                                                                                                                                                                                      | scaffold_5_mRNA_2197.1           | -                           | -                               |
| GF0029948 | 1                             | 0                        | 0                            | 0 Hypothetical protein (1)                                          |                                                                                                                                                                                                                                                           |                                                                                                                                                                                                                                                      | scaffold_5_mRNA_2196.1           | -                           | -                               |
| GF0029947 | 1                             | 0                        | 0                            | 0 LRR and NB-ARC domain disease resistance protein (1)              | ADP binding [GO:0043531]<br>molecular_function (1)                                                                                                                                                                                                        | Winged helix-turn-helix DNA-binding domain [IPR011991] (1); NB-ARC [IPR002182] (1); P-loop containing nucleoside triphosphate hydrolase [IPR027417] (1)                                                                                              | scaffold_5_mRNA_2195.1           | -                           | -                               |
| GF0029946 | 1                             | 0                        | 0                            | 0 Cytokinin riboside 5'-monophosphate phosphoribohydrolase (1)      | regulation of transcription, DNA-templated [GO:0006355]<br>biological_process (1); nucleic acid binding [GO:0003676]<br>molecular_function (1)                                                                                                            | LOG family [IPR031100] (1)                                                                                                                                                                                                                           | scaffold_5_mRNA_2193.1           | -                           | -                               |
| GF0029945 | 1                             | 0                        | 0                            | 0 Hypothetical protein (1)                                          |                                                                                                                                                                                                                                                           |                                                                                                                                                                                                                                                      | scaffold_5_mRNA_2192.1           | -                           | -                               |
| GF0029944 | 1                             | 0                        | 0                            | 0 Hypothetical protein (1)                                          |                                                                                                                                                                                                                                                           |                                                                                                                                                                                                                                                      | scaffold_5_mRNA_2190.1           | -                           | -                               |
| GF0029943 | 1                             | 0                        | 0                            | 0 Hypothetical protein (1)                                          |                                                                                                                                                                                                                                                           |                                                                                                                                                                                                                                                      | scaffold_5_mRNA_2185.1           | -                           | -                               |
| GF0029942 | 1                             | 0                        | 0                            | 0 Hypothetical protein (1)                                          |                                                                                                                                                                                                                                                           |                                                                                                                                                                                                                                                      | scaffold_5_mRNA_2184.1           | -                           | -                               |
| GF0029941 | 1                             | 0                        | 0                            | 0 Hypothetical protein (1)                                          | protein binding [GO:0005515]<br>molecular_function (1)                                                                                                                                                                                                    | Leucine-rich repeat [IPR001611] (1); Leucine-rich repeat domain, L domain-like [IPR032675] (1)                                                                                                                                                       | scaffold_5_mRNA_2183.1           | -                           | -                               |
| GF0029940 | 1                             | 0                        | 0                            | 0 Hypothetical protein (1)                                          |                                                                                                                                                                                                                                                           |                                                                                                                                                                                                                                                      | scaffold_5_mRNA_2182.1           | -                           | -                               |
| GF0029939 | 1                             | 0                        | 0                            | 0 Hypothetical protein (1)                                          |                                                                                                                                                                                                                                                           |                                                                                                                                                                                                                                                      | scaffold_5_mRNA_2181.1           | -                           | -                               |
| GF0029938 | 1                             | 0                        | 0                            | 0 Hypothetical protein (1)                                          |                                                                                                                                                                                                                                                           |                                                                                                                                                                                                                                                      | scaffold_5_mRNA_2180.1           | -                           | -                               |
| GF0029937 | 1                             | 0                        | 0                            | 0 Hypothetical protein (1)                                          |                                                                                                                                                                                                                                                           |                                                                                                                                                                                                                                                      | scaffold_5_mRNA_2179.1           | -                           | -                               |
| GF0029936 | 1                             | 0                        | 0                            | 0 Hypothetical protein (1)                                          |                                                                                                                                                                                                                                                           |                                                                                                                                                                                                                                                      | scaffold_5_mRNA_2173.1           | -                           | -                               |
| GF0029935 | 1                             | 0                        | 0                            | 0 Hypothetical protein (1)                                          |                                                                                                                                                                                                                                                           |                                                                                                                                                                                                                                                      | scaffold_5_mRNA_2171.1           | -                           | -                               |
| GF0029934 | 1                             | 0                        | 0                            | 0 Hypothetical protein (1)                                          |                                                                                                                                                                                                                                                           |                                                                                                                                                                                                                                                      | scaffold_5_mRNA_217.1            | -                           | -                               |
| GF0029933 | 1                             | 0                        | 0                            | 0 Hypothetical protein (1)                                          |                                                                                                                                                                                                                                                           |                                                                                                                                                                                                                                                      | scaffold_5_mRNA_2166.1           | -                           | -                               |
| GF0029932 | 1                             | 0                        | 0                            | 0 Hypothetical protein (1)                                          |                                                                                                                                                                                                                                                           |                                                                                                                                                                                                                                                      | scaffold_5_mRNA_2162.1           | -                           | -                               |
| GF0029931 | 1                             | 0                        | 0                            | 0 Hypothetical protein (1)                                          |                                                                                                                                                                                                                                                           |                                                                                                                                                                                                                                                      | scaffold_5_mRNA_2161.1           | -                           | -                               |
| GF0029930 | 1                             | 0                        | 0                            | 0 LRR and NB-ARC domain disease resistance protein (1)              | ADP binding [GO:0043531]<br>molecular_function (1)                                                                                                                                                                                                        | Winged helix-turn-helix DNA-binding domain [IPR011991] (1); Receptor L-domain [IPR00494] (1); Leucine-rich repeat domain, L domain-like [IPR032675] (1); P-loop containing nucleoside triphosphate hydrolase [IPR027417] (1); NB-ARC [IPR002182] (1) | scaffold_5_mRNA_216.1            | -                           | -                               |
| GF0029929 | 1                             | 0                        | 0                            | 0 ABSICIS ACID-INSENSITIVE 5-like protein 2 (1)                     | transcription factor activity, sequence-specific DNA binding [GO:0003700]<br>molecular_function (1); sequence-specific DNA binding [GO:0043565]<br>molecular_function (1); regulation of transcription, DNA-templated [GO:0006355 biological_process] (1) | Basic-leucine zipper domain [IPR004827] (1)                                                                                                                                                                                                          | scaffold_5_mRNA_2159.1           | -                           | -                               |
| GF0029928 | 1                             | 0                        | 0                            | 0 Hypothetical protein (1)                                          |                                                                                                                                                                                                                                                           |                                                                                                                                                                                                                                                      | scaffold_5_mRNA_2157.1           | -                           | -                               |
| GF0029927 | 1                             | 0                        | 0                            | 0 Hypothetical protein (1)                                          | nucleic acid binding [GO:0003676]<br>molecular_function (1)                                                                                                                                                                                               | Ribonuclease H-like domain [IPR012337] (1)                                                                                                                                                                                                           | scaffold_5_mRNA_2152.1           | -                           | -                               |
| GF0029926 | 1                             | 0                        | 0                            | 0 Subtilisin-like serine endopeptidase family protein, putative (1) | serine-type endopeptidase activity [GO:0004252 molecular_function] (1); proteolysis [GO:0006508 biological_process] (1)                                                                                                                                   | Peptidase S8/S53 domain [IPR000209] (1)                                                                                                                                                                                                              | scaffold_5_mRNA_2148.1           | -                           | -                               |
| GF0029925 | 1                             | 0                        | 0                            | 0 Hypothetical protein (1)                                          |                                                                                                                                                                                                                                                           |                                                                                                                                                                                                                                                      | scaffold_5_mRNA_2145.1           | -                           | -                               |
| GF0029924 | 1                             | 0                        | 0                            | 0 Hypothetical protein (1)                                          |                                                                                                                                                                                                                                                           |                                                                                                                                                                                                                                                      | scaffold_5_mRNA_214.1            | -                           | -                               |
| GF0029923 | 1                             | 0                        | 0                            | 0 Hypothetical protein (1)                                          |                                                                                                                                                                                                                                                           |                                                                                                                                                                                                                                                      | scaffold_5_mRNA_2136.1           | -                           | -                               |
| GF0029922 | 1                             | 0                        | 0                            | 0 Cytokinin riboside 5'-monophosphate phosphoribohydrolase (1)      |                                                                                                                                                                                                                                                           |                                                                                                                                                                                                                                                      | scaffold_5_mRNA_2134.1           | -                           | -                               |
| GF0029921 | 1                             | 0                        | 0                            | 0 Hypothetical protein (1)                                          |                                                                                                                                                                                                                                                           |                                                                                                                                                                                                                                                      | scaffold_5_mRNA_2132.1           | -                           | -                               |
| GF0029920 | 1                             | 0                        | 0                            | 0 Hypothetical protein (1)                                          |                                                                                                                                                                                                                                                           |                                                                                                                                                                                                                                                      | scaffold_5_mRNA_2129.1           | -                           | -                               |
| GF0029919 | 1                             | 0                        | 0                            | 0 Hypothetical protein (1)                                          |                                                                                                                                                                                                                                                           |                                                                                                                                                                                                                                                      | scaffold_5_mRNA_2124.1           | -                           | -                               |
| GF0029918 | 1                             | 0                        | 0                            | 0 Hypothetical protein (1)                                          |                                                                                                                                                                                                                                                           |                                                                                                                                                                                                                                                      | scaffold_5_mRNA_2122.1           | -                           | -                               |
| GF0029917 | 1                             | 0                        | 0                            | 0 Hypothetical protein (1)                                          |                                                                                                                                                                                                                                                           |                                                                                                                                                                                                                                                      | scaffold_5_mRNA_212.1            | -                           | -                               |
| GF0029916 | 1                             | 0                        | 0                            | 0 Hypothetical protein (1)                                          |                                                                                                                                                                                                                                                           |                                                                                                                                                                                                                                                      | scaffold_5_mRNA_2117.1           | -                           | -                               |
| GF0029915 | 1                             | 0                        | 0                            | 0 Hypothetical protein (1)                                          |                                                                                                                                                                                                                                                           |                                                                                                                                                                                                                                                      | scaffold_5_mRNA_2116.1           | -                           | -                               |
| GF0029914 | 1                             | 0                        | 0                            | 0 Hypothetical protein (1)                                          |                                                                                                                                                                                                                                                           |                                                                                                                                                                                                                                                      | scaffold_5_mRNA_2115.1           | -                           | -                               |
| GF0029913 | 1                             | 0                        | 0                            | 0 Hypothetical protein (1)                                          |                                                                                                                                                                                                                                                           |                                                                                                                                                                                                                                                      | scaffold_5_mRNA_2114.1           | -                           | -                               |
| GF0029912 | 1                             | 0                        | 0                            | 0 Hypothetical protein (1)                                          | nucleic acid binding [GO:0003676]<br>molecular_function (1); zinc ion binding [GO:0008270 molecular_function] (1)                                                                                                                                         | Viral movement protein [IPR028919] (1); Zinc finger, CCHC-type [IPR001878] (1)                                                                                                                                                                       | scaffold_5_mRNA_2112.1           | -                           | -                               |
| GF0029911 | 1                             | 0                        | 0                            | 0 Hypothetical protein (1)                                          |                                                                                                                                                                                                                                                           |                                                                                                                                                                                                                                                      | scaffold_5_mRNA_2111.1           | -                           | -                               |
| GF0029910 | 1                             | 0                        | 0                            | 0 Cytokinin riboside 5'-monophosphate phosphoribohydrolase (1)      |                                                                                                                                                                                                                                                           |                                                                                                                                                                                                                                                      | scaffold_5_mRNA_2110.1           | -                           | -                               |
| GF0029909 | 1                             | 0                        | 0                            | 0 Hypothetical protein (1)                                          |                                                                                                                                                                                                                                                           |                                                                                                                                                                                                                                                      | scaffold_5_mRNA_2109.1           | -                           | -                               |
| GF0029908 | 1                             | 0                        | 0                            | 0 Hypothetical protein (1)                                          |                                                                                                                                                                                                                                                           |                                                                                                                                                                                                                                                      | scaffold_5_mRNA_2107.1           | -                           | -                               |

| ID        | Num. in <i>C. clementinae</i> | Num. in <i>C. uashba</i> | Num. in <i>P. trifoliata</i> | Note                                                                         | GO                                                                                                                                                                                                                                                         | InterPro                                                                                                                                                                                                                                                                                                                                                                                                                                                                                                                                                                                                                                           | Members in <i>C. clementinae</i> | Members in <i>C. uashba</i> | Members in <i>P. trifoliata</i> |
|-----------|-------------------------------|--------------------------|------------------------------|------------------------------------------------------------------------------|------------------------------------------------------------------------------------------------------------------------------------------------------------------------------------------------------------------------------------------------------------|----------------------------------------------------------------------------------------------------------------------------------------------------------------------------------------------------------------------------------------------------------------------------------------------------------------------------------------------------------------------------------------------------------------------------------------------------------------------------------------------------------------------------------------------------------------------------------------------------------------------------------------------------|----------------------------------|-----------------------------|---------------------------------|
| GF0029907 | 1                             | 0                        | 0                            | 0 Hypothetical protein (1)                                                   | nucleic acid binding [GO:0003676 molecular_function] (1); integral component of membrane [GO:0016021 cellular_component] (1); transmembrane transporter activity [GO:0022857 molecular_function] (1); zinc ion binding [GO:0008270 molecular_function] (1) | Protein kinase-like domain [IPR011009] (1)                                                                                                                                                                                                                                                                                                                                                                                                                                                                                                                                                                                                         | scaffold_5_mRNA_2106.1           | -                           | -                               |
| GF0029906 | 1                             | 0                        | 0                            | 0 Hypothetical protein (1)                                                   | nucleic acid binding [GO:0003676 molecular_function] (1); integral component of membrane [GO:0016021 cellular_component] (1); transmembrane transporter activity [GO:0022857 molecular_function] (1); zinc ion binding [GO:0008270 molecular_function] (1) | WAT1-related protein [IPR030184] (1); Zinc finger, CCHC-type [IPR001878] (1)                                                                                                                                                                                                                                                                                                                                                                                                                                                                                                                                                                       | scaffold_5_mRNA_2105.1           | -                           | -                               |
| GF0029905 | 1                             | 0                        | 0                            | 0 Hypothetical protein (1)                                                   |                                                                                                                                                                                                                                                            |                                                                                                                                                                                                                                                                                                                                                                                                                                                                                                                                                                                                                                                    | scaffold_5_mRNA_2102.1           | -                           | -                               |
| GF0029904 | 1                             | 0                        | 0                            | 0 Hypothetical protein (1)                                                   |                                                                                                                                                                                                                                                            | LOG family [IPR031100] (1)                                                                                                                                                                                                                                                                                                                                                                                                                                                                                                                                                                                                                         | scaffold_5_mRNA_2101.1           | -                           | -                               |
| GF0029903 | 1                             | 0                        | 0                            | 0 Hypothetical protein (1)                                                   |                                                                                                                                                                                                                                                            |                                                                                                                                                                                                                                                                                                                                                                                                                                                                                                                                                                                                                                                    | scaffold_5_mRNA_2097.1           | -                           | -                               |
| GF0029902 | 1                             | 0                        | 0                            | 0 Hypothetical protein (1)                                                   |                                                                                                                                                                                                                                                            |                                                                                                                                                                                                                                                                                                                                                                                                                                                                                                                                                                                                                                                    | scaffold_5_mRNA_2095.1           | -                           | -                               |
| GF0029901 | 1                             | 0                        | 0                            | 0 Hypothetical protein (1)                                                   |                                                                                                                                                                                                                                                            |                                                                                                                                                                                                                                                                                                                                                                                                                                                                                                                                                                                                                                                    | scaffold_5_mRNA_2094.1           | -                           | -                               |
| GF0029900 | 1                             | 0                        | 0                            | 0 Hypothetical protein (1)                                                   |                                                                                                                                                                                                                                                            |                                                                                                                                                                                                                                                                                                                                                                                                                                                                                                                                                                                                                                                    | scaffold_5_mRNA_2093.1           | -                           | -                               |
| GF0028899 | 1                             | 0                        | 0                            | 0 Hypothetical protein (1)                                                   |                                                                                                                                                                                                                                                            |                                                                                                                                                                                                                                                                                                                                                                                                                                                                                                                                                                                                                                                    | scaffold_5_mRNA_2090.1           | -                           | -                               |
| GF0028898 | 1                             | 0                        | 0                            | 0 Hypothetical protein (1)                                                   |                                                                                                                                                                                                                                                            |                                                                                                                                                                                                                                                                                                                                                                                                                                                                                                                                                                                                                                                    | scaffold_5_mRNA_2088.1           | -                           | -                               |
| GF0028897 | 1                             | 0                        | 0                            | 0 Hypothetical protein (1)                                                   |                                                                                                                                                                                                                                                            |                                                                                                                                                                                                                                                                                                                                                                                                                                                                                                                                                                                                                                                    | scaffold_5_mRNA_2086.1           | -                           | -                               |
| GF0028896 | 1                             | 0                        | 0                            | 0 Hypothetical protein (1)                                                   |                                                                                                                                                                                                                                                            |                                                                                                                                                                                                                                                                                                                                                                                                                                                                                                                                                                                                                                                    | scaffold_5_mRNA_2085.1           | -                           | -                               |
| GF0028895 | 1                             | 0                        | 0                            | 0 Hypothetical protein (1)                                                   |                                                                                                                                                                                                                                                            |                                                                                                                                                                                                                                                                                                                                                                                                                                                                                                                                                                                                                                                    | scaffold_5_mRNA_2083.1           | -                           | -                               |
| GF0028894 | 1                             | 0                        | 0                            | 0 Hypothetical protein (1)                                                   |                                                                                                                                                                                                                                                            |                                                                                                                                                                                                                                                                                                                                                                                                                                                                                                                                                                                                                                                    | scaffold_5_mRNA_2082.1           | -                           | -                               |
| GF0028893 | 1                             | 0                        | 0                            | 0 Hypothetical protein (1)                                                   |                                                                                                                                                                                                                                                            |                                                                                                                                                                                                                                                                                                                                                                                                                                                                                                                                                                                                                                                    | scaffold_5_mRNA_2079.1           | -                           | -                               |
| GF0028892 | 1                             | 0                        | 0                            | 0 Hypothetical protein (1)                                                   |                                                                                                                                                                                                                                                            | Viral movement protein [IPR028919] (1)                                                                                                                                                                                                                                                                                                                                                                                                                                                                                                                                                                                                             | scaffold_5_mRNA_2074.1           | -                           | -                               |
| GF0028891 | 1                             | 0                        | 0                            | 0 Hypothetical protein (1)                                                   |                                                                                                                                                                                                                                                            | Reverse transcriptase domain [IPR000477] (1)                                                                                                                                                                                                                                                                                                                                                                                                                                                                                                                                                                                                       | scaffold_5_mRNA_2073.1           | -                           | -                               |
| GF0028890 | 1                             | 0                        | 0                            | 0 Hypothetical protein (1)                                                   |                                                                                                                                                                                                                                                            |                                                                                                                                                                                                                                                                                                                                                                                                                                                                                                                                                                                                                                                    | scaffold_5_mRNA_2070.1           | -                           | -                               |
| GF0028889 | 1                             | 0                        | 0                            | 0 Hypothetical protein (1)                                                   |                                                                                                                                                                                                                                                            |                                                                                                                                                                                                                                                                                                                                                                                                                                                                                                                                                                                                                                                    | scaffold_5_mRNA_2068.1           | -                           | -                               |
| GF0028888 | 1                             | 0                        | 0                            | 0 Hypothetical protein (1)                                                   |                                                                                                                                                                                                                                                            |                                                                                                                                                                                                                                                                                                                                                                                                                                                                                                                                                                                                                                                    | scaffold_5_mRNA_2067.1           | -                           | -                               |
| GF0028887 | 1                             | 0                        | 0                            | 0 Hypothetical protein (1)                                                   |                                                                                                                                                                                                                                                            |                                                                                                                                                                                                                                                                                                                                                                                                                                                                                                                                                                                                                                                    | scaffold_5_mRNA_2066.1           | -                           | -                               |
| GF0028886 | 1                             | 0                        | 0                            | 0 Hypothetical protein (1)                                                   |                                                                                                                                                                                                                                                            |                                                                                                                                                                                                                                                                                                                                                                                                                                                                                                                                                                                                                                                    | scaffold_5_mRNA_206.1            | -                           | -                               |
| GF0028885 | 1                             | 0                        | 0                            | 0 Hypothetical protein (1)                                                   |                                                                                                                                                                                                                                                            |                                                                                                                                                                                                                                                                                                                                                                                                                                                                                                                                                                                                                                                    | scaffold_5_mRNA_2056.1           | -                           | -                               |
| GF0028884 | 1                             | 0                        | 0                            | 0 Hypothetical protein (1)                                                   |                                                                                                                                                                                                                                                            | Viral movement protein [IPR028919] (1)                                                                                                                                                                                                                                                                                                                                                                                                                                                                                                                                                                                                             | scaffold_5_mRNA_2054.1           | -                           | -                               |
| GF0028883 | 1                             | 0                        | 0                            | 0 Hypothetical protein (1)                                                   |                                                                                                                                                                                                                                                            |                                                                                                                                                                                                                                                                                                                                                                                                                                                                                                                                                                                                                                                    | scaffold_5_mRNA_2051.1           | -                           | -                               |
| GF0028882 | 1                             | 0                        | 0                            | 0 Hypothetical protein (1)                                                   |                                                                                                                                                                                                                                                            |                                                                                                                                                                                                                                                                                                                                                                                                                                                                                                                                                                                                                                                    | scaffold_5_mRNA_2050.1           | -                           | -                               |
| GF0028881 | 1                             | 0                        | 0                            | 0 cDNA clone002-112-E03, full insert sequence (1)                            |                                                                                                                                                                                                                                                            | Reverse transcriptase domain [IPR000477] (1)                                                                                                                                                                                                                                                                                                                                                                                                                                                                                                                                                                                                       | scaffold_5_mRNA_2048.1           | -                           | -                               |
| GF0028880 | 1                             | 0                        | 0                            | 0 Hypothetical protein (1)                                                   |                                                                                                                                                                                                                                                            |                                                                                                                                                                                                                                                                                                                                                                                                                                                                                                                                                                                                                                                    | scaffold_5_mRNA_2047.1           | -                           | -                               |
| GF0028879 | 1                             | 0                        | 0                            | 0 Hypothetical protein (1)                                                   |                                                                                                                                                                                                                                                            |                                                                                                                                                                                                                                                                                                                                                                                                                                                                                                                                                                                                                                                    | scaffold_5_mRNA_2042.1           | -                           | -                               |
| GF0028878 | 1                             | 0                        | 0                            | 0 Hypothetical protein (1)                                                   |                                                                                                                                                                                                                                                            |                                                                                                                                                                                                                                                                                                                                                                                                                                                                                                                                                                                                                                                    | scaffold_5_mRNA_2038.1           | -                           | -                               |
| GF0028877 | 1                             | 0                        | 0                            | 0 Hypothetical protein (1)                                                   | zinc ion binding [GO:0008270 molecular_function] (1); nucleic acid binding [GO:0003676 molecular_function] (1)                                                                                                                                             | Zinc finger, CCHC-type [IPR001878] (1)                                                                                                                                                                                                                                                                                                                                                                                                                                                                                                                                                                                                             | scaffold_5_mRNA_2030.1           | -                           | -                               |
| GF0028876 | 1                             | 0                        | 0                            | 0 Hypothetical protein (1)                                                   |                                                                                                                                                                                                                                                            |                                                                                                                                                                                                                                                                                                                                                                                                                                                                                                                                                                                                                                                    | scaffold_5_mRNA_2028.1           | -                           | -                               |
| GF0028875 | 1                             | 0                        | 0                            | 0 Hypothetical protein (1)                                                   |                                                                                                                                                                                                                                                            |                                                                                                                                                                                                                                                                                                                                                                                                                                                                                                                                                                                                                                                    | scaffold_5_mRNA_2025.1           | -                           | -                               |
| GF0028874 | 1                             | 0                        | 0                            | 0 Hypothetical protein (1)                                                   | proteolysis [GO:0006508 biological_process] (1); cysteine-type peptidase activity [GO:0008234 molecular_function] (1)                                                                                                                                      | Upl1 protease family, C-terminal catalytic domain [IPR003653] (1)                                                                                                                                                                                                                                                                                                                                                                                                                                                                                                                                                                                  | scaffold_5_mRNA_2022.1           | -                           | -                               |
| GF0028873 | 1                             | 0                        | 0                            | 0 Hypothetical protein (1)                                                   |                                                                                                                                                                                                                                                            | Proteinase-like domain [IPR005502] (1)                                                                                                                                                                                                                                                                                                                                                                                                                                                                                                                                                                                                             | scaffold_5_mRNA_2013.1           | -                           | -                               |
| GF0028872 | 1                             | 0                        | 0                            | 0 Hypothetical protein (1)                                                   | regulation of transcription, DNA-templated [GO:0006355 biological_process] (1)                                                                                                                                                                             | FHY3/FAR1 family [IPR011052] (1); FAR1 DNA binding domain [IPR004330] (1)                                                                                                                                                                                                                                                                                                                                                                                                                                                                                                                                                                          | scaffold_5_mRNA_2007.1           | -                           | -                               |
| GF0028871 | 1                             | 0                        | 0                            | 0 Hypothetical protein (1)                                                   | transferase activity, transferring acyl groups other than amino-acyl groups [GO:0016747 molecular_function] (1)                                                                                                                                            | Transferase [IPR003480] (1)                                                                                                                                                                                                                                                                                                                                                                                                                                                                                                                                                                                                                        | scaffold_5_mRNA_2005.1           | -                           | -                               |
| GF0028870 | 1                             | 0                        | 0                            | 0 Hypothetical protein (1)                                                   |                                                                                                                                                                                                                                                            | Domain of unknown function DUF1985 [IPR015410] (1)                                                                                                                                                                                                                                                                                                                                                                                                                                                                                                                                                                                                 | scaffold_5_mRNA_1998.1           | -                           | -                               |
| GF0028869 | 1                             | 0                        | 0                            | 0 Hypothetical protein (1)                                                   |                                                                                                                                                                                                                                                            | LOG family [IPR031100] (1)                                                                                                                                                                                                                                                                                                                                                                                                                                                                                                                                                                                                                         | scaffold_5_mRNA_1997.1           | -                           | -                               |
| GF0028868 | 1                             | 0                        | 0                            | 0 Hypothetical protein (1)                                                   | RNA-DNA hybrid ribonuclease activity [GO:0004523 molecular_function] (1); nucleic acid binding [GO:0003676 molecular_function] (1)                                                                                                                         | Ribonuclease H domain [IPR002156] (1); Ribonuclease H-like domain [IPR012337] (1)                                                                                                                                                                                                                                                                                                                                                                                                                                                                                                                                                                  | scaffold_5_mRNA_1996.1           | -                           | -                               |
| GF0028867 | 1                             | 0                        | 0                            | 0 Acylsugar acyltransferase 3 (1)                                            | transferase activity, transferring acyl groups other than amino-acyl groups [GO:0016747 molecular_function] (1)                                                                                                                                            | Transferase [IPR003480] (1)                                                                                                                                                                                                                                                                                                                                                                                                                                                                                                                                                                                                                        | scaffold_5_mRNA_1886.1           | -                           | -                               |
| GF0028866 | 1                             | 0                        | 0                            | 0 Hypothetical protein (1)                                                   |                                                                                                                                                                                                                                                            |                                                                                                                                                                                                                                                                                                                                                                                                                                                                                                                                                                                                                                                    | scaffold_5_mRNA_1885.1           | -                           | -                               |
| GF0028865 | 1                             | 0                        | 0                            | 0 Hypothetical protein (1)                                                   |                                                                                                                                                                                                                                                            |                                                                                                                                                                                                                                                                                                                                                                                                                                                                                                                                                                                                                                                    | scaffold_5_mRNA_1877.1           | -                           | -                               |
| GF0028864 | 1                             | 0                        | 0                            | 0 Hypothetical protein (1)                                                   |                                                                                                                                                                                                                                                            |                                                                                                                                                                                                                                                                                                                                                                                                                                                                                                                                                                                                                                                    | scaffold_5_mRNA_1876.1           | -                           | -                               |
| GF0028863 | 1                             | 0                        | 0                            | 0 Hypothetical protein (1)                                                   |                                                                                                                                                                                                                                                            |                                                                                                                                                                                                                                                                                                                                                                                                                                                                                                                                                                                                                                                    | scaffold_5_mRNA_1869.1           | -                           | -                               |
| GF0028862 | 1                             | 0                        | 0                            | 0 Hypothetical protein (1)                                                   |                                                                                                                                                                                                                                                            |                                                                                                                                                                                                                                                                                                                                                                                                                                                                                                                                                                                                                                                    | scaffold_5_mRNA_1863.1           | -                           | -                               |
| GF0028861 | 1                             | 0                        | 0                            | 0 Hypothetical protein (1)                                                   |                                                                                                                                                                                                                                                            | DNA (cytosine-5)-methyltransferase 1, replication foci domain [IPR022702] (1)                                                                                                                                                                                                                                                                                                                                                                                                                                                                                                                                                                      | scaffold_5_mRNA_186.1            | -                           | -                               |
| GF0028860 | 1                             | 0                        | 0                            | 0 Hypothetical protein (1)                                                   |                                                                                                                                                                                                                                                            |                                                                                                                                                                                                                                                                                                                                                                                                                                                                                                                                                                                                                                                    | scaffold_5_mRNA_1951.1           | -                           | -                               |
| GF0028859 | 1                             | 0                        | 0                            | 0 LRR and NB-ARC domains-containing disease resistance protein, putative (1) | ADP binding [GO:0043531 molecular_function] (1)                                                                                                                                                                                                            | Winged helix-turn-helix DNA-binding domain [IPR011991] (1); Leucine-rich repeat domain, L domain-like [IPR032675] (1); NB-ARC [IPR002182] (1); P-loop containing nucleoside triphosphate hydrolase [IPR027417] (1); Leucine-rich repeat domain, L domain-like [IPR032675] (1); Protein kinase-like domain [IPR011009] (1); Leucine-rich repeat, typical subtype [IPR003591] (1); Protein kinase domain [IPR000719] (1); Leucine-rich repeat [IPR001611] (1); Serine/threonine-protein kinase, active site [IPR008271] (1); Protein kinase, ATP binding site [IPR017441] (1); Leucine-rich repeat-containing N-terminal, plant-type [IPR013210] (1) | scaffold_5_mRNA_195.1            | -                           | -                               |
| GF0028858 | 1                             | 0                        | 0                            | 0 LRR receptor-like kinase (1)                                               | protein binding [GO:0005515 molecular_function] (1); protein phosphorylation [GO:0006468 biological_process] (1); protein kinase activity [GO:0004672 molecular_function] (1); ATP binding [GO:0005524 molecular_function] (1)                             | Protein kinase domain [IPR000719] (1); Leucine-rich repeat [IPR001611] (1); Serine/threonine-protein kinase, active site [IPR008271] (1); Protein kinase, ATP binding site [IPR017441] (1); Leucine-rich repeat-containing N-terminal, plant-type [IPR013210] (1)                                                                                                                                                                                                                                                                                                                                                                                  | scaffold_5_mRNA_1947.1           | -                           | -                               |
| GF0028857 | 1                             | 0                        | 0                            | 0 Hypothetical protein (1)                                                   | RNA-DNA hybrid ribonuclease activity [GO:0004523 molecular_function] (1); nucleic acid binding [GO:0003676 molecular_function] (1)                                                                                                                         | Ribonuclease H domain [IPR002156] (1); Ribonuclease H-like domain [IPR012337] (1)                                                                                                                                                                                                                                                                                                                                                                                                                                                                                                                                                                  | scaffold_5_mRNA_1943.1           | -                           | -                               |
| GF0028856 | 1                             | 0                        | 0                            | 0 Hypothetical protein (1)                                                   |                                                                                                                                                                                                                                                            |                                                                                                                                                                                                                                                                                                                                                                                                                                                                                                                                                                                                                                                    | scaffold_5_mRNA_1926.1           | -                           | -                               |
| GF0028855 | 1                             | 0                        | 0                            | 0 Hypothetical protein (1)                                                   | transferase activity, transferring hexosyl groups [GO:0016758 molecular_function] (1); zinc ion binding [GO:0008270 molecular_function] (1); metabolic process [GO:0008152 biological_process] (1)                                                         | UDP-glucuronosyl UDP-glucosyltransferase [IPR002213] (1); Transposase, MuDR, plant [IPR004332] (1); Zinc finger, PMZ-type [IPR0006564] (1); Zinc finger, SWIM-type [IPR007527] (1)                                                                                                                                                                                                                                                                                                                                                                                                                                                                 | scaffold_5_mRNA_1924.1           | -                           | -                               |
| GF0028854 | 1                             | 0                        | 0                            | 0 Hypothetical protein (1)                                                   | ADP binding [GO:0043531 molecular_function] (1)                                                                                                                                                                                                            | NB-ARC [IPR002182] (1); P-loop containing nucleoside triphosphate hydrolase [IPR027417] (1)                                                                                                                                                                                                                                                                                                                                                                                                                                                                                                                                                        | scaffold_5_mRNA_1921.1           | -                           | -                               |
| GF0028853 | 1                             | 0                        | 0                            | 0 Hypothetical protein (1)                                                   |                                                                                                                                                                                                                                                            |                                                                                                                                                                                                                                                                                                                                                                                                                                                                                                                                                                                                                                                    | scaffold_5_mRNA_1914.1           | -                           | -                               |
| GF0028852 | 1                             | 0                        | 0                            | 0 Hypothetical protein (1)                                                   | regulation of transcription, DNA-templated [GO:0006355 biological_process] (1); nucleic acid binding [GO:0003676 molecular_function] (1)                                                                                                                   | Carlavirus nucleic acid-binding protein [IPR025688] (1)                                                                                                                                                                                                                                                                                                                                                                                                                                                                                                                                                                                            | scaffold_5_mRNA_1913.1           | -                           | -                               |
| GF0028851 | 1                             | 0                        | 0                            | 0 Hypothetical protein (1)                                                   |                                                                                                                                                                                                                                                            |                                                                                                                                                                                                                                                                                                                                                                                                                                                                                                                                                                                                                                                    | scaffold_5_mRNA_1909.1           | -                           | -                               |
| GF0028850 | 1                             | 0                        | 0                            | 0 Hypothetical protein (1)                                                   |                                                                                                                                                                                                                                                            |                                                                                                                                                                                                                                                                                                                                                                                                                                                                                                                                                                                                                                                    | scaffold_5_mRNA_1908.1           | -                           | -                               |
| GF0028849 | 1                             | 0                        | 0                            | 0 Hypothetical protein (1)                                                   | DNA binding [GO:0003677 molecular_function] (1)                                                                                                                                                                                                            | Zinc finger, BED-type [IPR003656] (1)                                                                                                                                                                                                                                                                                                                                                                                                                                                                                                                                                                                                              | scaffold_5_mRNA_1903.1           | -                           | -                               |
| GF0028848 | 1                             | 0                        | 0                            | 0 Hypothetical protein (1)                                                   |                                                                                                                                                                                                                                                            |                                                                                                                                                                                                                                                                                                                                                                                                                                                                                                                                                                                                                                                    | scaffold_5_mRNA_1894.1           | -                           | -                               |
| GF0028847 | 1                             | 0                        | 0                            | 0 Hypothetical protein (1)                                                   |                                                                                                                                                                                                                                                            |                                                                                                                                                                                                                                                                                                                                                                                                                                                                                                                                                                                                                                                    | scaffold_5_mRNA_1889.1           | -                           | -                               |
| GF0028846 | 1                             | 0                        | 0                            | 0 Hypothetical protein (1)                                                   |                                                                                                                                                                                                                                                            | Retrotransposon gag domain [IPR005162] (1)                                                                                                                                                                                                                                                                                                                                                                                                                                                                                                                                                                                                         | scaffold_5_mRNA_1888.1           | -                           | -                               |
| GF0028845 | 1                             | 0                        | 0                            | 0 Hypothetical protein (1)                                                   |                                                                                                                                                                                                                                                            |                                                                                                                                                                                                                                                                                                                                                                                                                                                                                                                                                                                                                                                    | scaffold_5_mRNA_1887.1           | -                           | -                               |
| GF0028844 | 1                             | 0                        | 0                            | 0 Hypothetical protein (1)                                                   | protein dimerization activity [GO:0046093 molecular_function] (1); nucleic acid binding [GO:0003676 molecular_function] (1)                                                                                                                                | Ribonuclease H-like domain [IPR012337] (1); HAT, C-terminal dimerisation domain [IPR008906] (1)                                                                                                                                                                                                                                                                                                                                                                                                                                                                                                                                                    | scaffold_5_mRNA_1884.1           | -                           | -                               |
| GF0028843 | 1                             | 0                        | 0                            | 0 Hypothetical protein (1)                                                   |                                                                                                                                                                                                                                                            |                                                                                                                                                                                                                                                                                                                                                                                                                                                                                                                                                                                                                                                    | scaffold_5_mRNA_1883.1           | -                           | -                               |
| GF0028842 | 1                             | 0                        | 0                            | 0 Hypothetical protein (1)                                                   |                                                                                                                                                                                                                                                            |                                                                                                                                                                                                                                                                                                                                                                                                                                                                                                                                                                                                                                                    | scaffold_5_mRNA_1877.1           | -                           | -                               |
| GF0028841 | 1                             | 0                        | 0                            | 0 Hypothetical protein (1)                                                   |                                                                                                                                                                                                                                                            |                                                                                                                                                                                                                                                                                                                                                                                                                                                                                                                                                                                                                                                    | scaffold_5_mRNA_1871.1           | -                           | -                               |
| GF0028840 | 1                             | 0                        | 0                            | 0 Hypothetical protein (1)                                                   |                                                                                                                                                                                                                                                            |                                                                                                                                                                                                                                                                                                                                                                                                                                                                                                                                                                                                                                                    | scaffold_5_mRNA_1868.1           | -                           | -                               |
| GF0028839 | 1                             | 0                        | 0                            | 0 Hypothetical protein (1)                                                   |                                                                                                                                                                                                                                                            |                                                                                                                                                                                                                                                                                                                                                                                                                                                                                                                                                                                                                                                    | scaffold_5_mRNA_1867.1           | -                           | -                               |
| GF0028838 | 1                             | 0                        | 0                            | 0 Putative nuclease HARB1 (1)                                                |                                                                                                                                                                                                                                                            | Harbinger transposase-derived nuclease domain [IPR027806] (1)                                                                                                                                                                                                                                                                                                                                                                                                                                                                                                                                                                                      | scaffold_5_mRNA_1865.1           | -                           | -                               |
| GF0028837 | 1                             | 0                        | 0                            | 0 Hypothetical protein (1)                                                   |                                                                                                                                                                                                                                                            |                                                                                                                                                                                                                                                                                                                                                                                                                                                                                                                                                                                                                                                    | scaffold_5_mRNA_1862.1           | -                           | -                               |
| GF0028836 | 1                             | 0                        | 0                            | 0 Cytokinin riboside 5'-monophosphate phosphoribohydrolase (1)               |                                                                                                                                                                                                                                                            | Cytokinin riboside 5'-monophosphate phosphoribohydrolase LOG [IPR005269] (1); LOG family [IPR031100] (1)                                                                                                                                                                                                                                                                                                                                                                                                                                                                                                                                           | scaffold_5_mRNA_1860.1           | -                           | -                               |
| GF0028835 | 1                             | 0                        | 0                            | 0 Cytokinin riboside 5'-monophosphate phosphoribohydrolase (1)               |                                                                                                                                                                                                                                                            | LOG family [IPR031100] (1)                                                                                                                                                                                                                                                                                                                                                                                                                                                                                                                                                                                                                         | scaffold_5_mRNA_1857.1           | -                           | -                               |
| GF0028834 | 1                             | 0                        | 0                            | 0 Hypothetical protein (1)                                                   |                                                                                                                                                                                                                                                            |                                                                                                                                                                                                                                                                                                                                                                                                                                                                                                                                                                                                                                                    | scaffold_5_mRNA_1856.1           | -                           | -                               |
| GF0028833 | 1                             | 0                        | 0                            | 0 Hypothetical protein (1)                                                   |                                                                                                                                                                                                                                                            |                                                                                                                                                                                                                                                                                                                                                                                                                                                                                                                                                                                                                                                    | scaffold_5_mRNA_1855.1           | -                           | -                               |



| ID        | Num. in <i>C. clementinae</i> | Num. in <i>C. uchiha</i> | Num. in <i>P. trifoliata</i> | Note                                                                                    | GO                                                                                                                                                                                                                                                                                                                                               | InterPro                                                                                                                                                                                                                                               | Members in <i>C. clementinae</i> | Members in <i>C. uchiha</i> | Members in <i>P. trifoliata</i> |
|-----------|-------------------------------|--------------------------|------------------------------|-----------------------------------------------------------------------------------------|--------------------------------------------------------------------------------------------------------------------------------------------------------------------------------------------------------------------------------------------------------------------------------------------------------------------------------------------------|--------------------------------------------------------------------------------------------------------------------------------------------------------------------------------------------------------------------------------------------------------|----------------------------------|-----------------------------|---------------------------------|
| GF0029832 | 1                             | 0                        | 0                            | 0 MUDRA-like transposase (1)                                                            |                                                                                                                                                                                                                                                                                                                                                  | MULE transposase domain [IPR018289] (1); Transposase, Mu/DR, plant [IPR004352] (1)                                                                                                                                                                     | scaffold_5_mRNA_1850.1           | -                           | -                               |
| GF0029831 | 1                             | 0                        | 0                            | 0 Hypothetical protein (1)                                                              |                                                                                                                                                                                                                                                                                                                                                  |                                                                                                                                                                                                                                                        | scaffold_5_mRNA_185.1            | -                           | -                               |
| GF0029830 | 1                             | 0                        | 0                            | 0 Cytokinin riboside 5'-monophosphate phosphoribohydrolase (1)                          |                                                                                                                                                                                                                                                                                                                                                  | LOG family [IPR031100] (1)                                                                                                                                                                                                                             | scaffold_5_mRNA_1846.1           | -                           | -                               |
| GF0029829 | 1                             | 0                        | 0                            | 0 Gibberellin 20-oxidase family protein (1)                                             |                                                                                                                                                                                                                                                                                                                                                  | Isopenicillin N synthase-like [IPR027443] (1); Non-haem dixygenase N-terminal domain [IPR026992] (1); Oxoglutarate/iron-dependent dixygenase [IPR005123] (1)                                                                                           | scaffold_5_mRNA_1840.1           | -                           | -                               |
| GF0029828 | 1                             | 0                        | 0                            | 0 Hypothetical protein (1)                                                              |                                                                                                                                                                                                                                                                                                                                                  |                                                                                                                                                                                                                                                        | scaffold_5_mRNA_184.1            | -                           | -                               |
| GF0029827 | 1                             | 0                        | 0                            | 0 Gibberellin 20 oxidase (1)                                                            | oxidoreductase activity [GO:0016491 molecular_function] (1); oxidation-reduction process [GO:0055114 biological_process] (1)                                                                                                                                                                                                                     | Isopenicillin N synthase-like [IPR027443] (1); Non-haem dixygenase N-terminal domain [IPR026992] (1); Oxoglutarate/iron-dependent dixygenase [IPR005123] (1)                                                                                           | scaffold_5_mRNA_1839.1           | -                           | -                               |
| GF0029826 | 1                             | 0                        | 0                            | 0 Hypothetical protein (1)                                                              |                                                                                                                                                                                                                                                                                                                                                  | LysM domain [IPR018392] (1)                                                                                                                                                                                                                            | scaffold_5_mRNA_1834.1           | -                           | -                               |
| GF0029825 | 1                             | 0                        | 0                            | 0 Hypothetical protein (1)                                                              | nucleic acid binding [GO:0003676 molecular_function] (1)                                                                                                                                                                                                                                                                                         | Domain of unknown function DU4283 [IPR025588] (1); Ribonuclease H-like domain [IPR012337] (1); TB2/DP1/HV A22-related protein [IPR004345] (1)                                                                                                          | scaffold_5_mRNA_1833.1           | -                           | -                               |
| GF0029824 | 1                             | 0                        | 0                            | 0 Hypothetical protein (1)                                                              |                                                                                                                                                                                                                                                                                                                                                  |                                                                                                                                                                                                                                                        | scaffold_5_mRNA_1832.1           | -                           | -                               |
| GF0029823 | 1                             | 0                        | 0                            | 0 Hypothetical protein (1)                                                              | calmodulin binding [GO:0005516 molecular_function] (1)                                                                                                                                                                                                                                                                                           | Calcium-transporting P-type ATPase, N-terminal autoinhibitory domain [IPR024750] (1)                                                                                                                                                                   | scaffold_5_mRNA_183.1            | -                           | -                               |
| GF0029822 | 1                             | 0                        | 0                            | 0 Hypothetical protein (1)                                                              |                                                                                                                                                                                                                                                                                                                                                  |                                                                                                                                                                                                                                                        | scaffold_5_mRNA_1826.1           | -                           | -                               |
| GF0029821 | 1                             | 0                        | 0                            | 0 Hypothetical protein (1)                                                              |                                                                                                                                                                                                                                                                                                                                                  |                                                                                                                                                                                                                                                        | scaffold_5_mRNA_1823.1           | -                           | -                               |
| GF0029820 | 1                             | 0                        | 0                            | 0 Integrase (1)                                                                         |                                                                                                                                                                                                                                                                                                                                                  | Aspartic peptidase domain [IPR021109] (1); Retrotransposon gag domain [IPR005162] (1)                                                                                                                                                                  | scaffold_5_mRNA_1814.1           | -                           | -                               |
| GF0029819 | 1                             | 0                        | 0                            | 0 Hypothetical protein (1)                                                              |                                                                                                                                                                                                                                                                                                                                                  |                                                                                                                                                                                                                                                        | scaffold_5_mRNA_1812.1           | -                           | -                               |
| GF0029818 | 1                             | 0                        | 0                            | 0 Hypothetical protein (1)                                                              |                                                                                                                                                                                                                                                                                                                                                  |                                                                                                                                                                                                                                                        | scaffold_5_mRNA_1810.1           | -                           | -                               |
| GF0029817 | 1                             | 0                        | 0                            | 0 L-type lectin domain containing receptor kinase IX.1 (1)                              | ATP binding [GO:000524 molecular_function] (1); protein phosphorylation [GO:0006468 biological_process] (1); protein kinase activity [GO:0004672 molecular_function] (1); carbohydrate binding [GO:0030246 molecular_function] (1)                                                                                                               | Protein kinase-like domain [IPR011009] (1); Legume lectin domain [IPR001220] (1); Concavallin A-like lectin/glucanase domain [IPR013320] (1); Protein kinase domain [IPR000719] (1); Protein kinase, ATP binding site [IPR017441] (1)                  | scaffold_5_mRNA_1807.1           | -                           | -                               |
| GF0029816 | 1                             | 0                        | 0                            | 0 Hypothetical protein (1)                                                              |                                                                                                                                                                                                                                                                                                                                                  |                                                                                                                                                                                                                                                        | scaffold_5_mRNA_1804.1           | -                           | -                               |
| GF0029815 | 1                             | 0                        | 0                            | 0 Hypothetical protein (1)                                                              | metal ion binding [GO:0046872 molecular_function] (1); nucleotide binding [GO:0000166 molecular_function] (1)                                                                                                                                                                                                                                    | HAD-like domain [IPR022214] (1); P-type ATPase, A domain [IPR008250] (1); P-type ATPase, cytoplasmic domain N [IPR025299] (1)                                                                                                                          | scaffold_5_mRNA_1802.1           | -                           | -                               |
| GF0029814 | 1                             | 0                        | 0                            | 0 cDNA clone:002-110-H12, full insert sequence (1)                                      | nucleic acid binding [GO:0003676 molecular_function] (1)                                                                                                                                                                                                                                                                                         | Ribonuclease H-like domain [IPR012337] (1)                                                                                                                                                                                                             | scaffold_5_mRNA_1800.1           | -                           | -                               |
| GF0029813 | 1                             | 0                        | 0                            | 0 BED zinc finger/JAT family dimerization domain (1)                                    | protein dimerization activity [GO:0046983 molecular_function] (1); nucleic acid binding [GO:0003676 molecular_function] (1)                                                                                                                                                                                                                      | Ribonuclease H-like domain [IPR012337] (1); HAT, C-terminal dimerisation domain [IPR008906] (1)                                                                                                                                                        | scaffold_5_mRNA_1797.1           | -                           | -                               |
| GF0029812 | 1                             | 0                        | 0                            | 0 Hypothetical protein (1)                                                              |                                                                                                                                                                                                                                                                                                                                                  |                                                                                                                                                                                                                                                        | scaffold_5_mRNA_1796.1           | -                           | -                               |
| GF0029811 | 1                             | 0                        | 0                            | 0 Hypothetical protein (1)                                                              |                                                                                                                                                                                                                                                                                                                                                  |                                                                                                                                                                                                                                                        | scaffold_5_mRNA_1788.1           | -                           | -                               |
| GF0029810 | 1                             | 0                        | 0                            | 0 Disease resistance protein (CC-NBS-LRR class) family protein (1)                      | ADP binding [GO:0043531 molecular_function] (1)                                                                                                                                                                                                                                                                                                  | NB-ARC [IPR002182] (1); AAA+ ATPase domain [IPR003593] (1); P-loop containing nucleoside triphosphate hydrolase [IPR027417] (1); Winged helix-turn-helix DNA-binding domain [IPR011991] (1); Leucine-rich repeat domain, L domain-like [IPR032675] (1) | scaffold_5_mRNA_1777.1           | -                           | -                               |
| GF0029809 | 1                             | 0                        | 0                            | 0 Hypothetical protein (1)                                                              |                                                                                                                                                                                                                                                                                                                                                  |                                                                                                                                                                                                                                                        | scaffold_5_mRNA_1772.1           | -                           | -                               |
| GF0029808 | 1                             | 0                        | 0                            | 0 Hypothetical protein (1)                                                              |                                                                                                                                                                                                                                                                                                                                                  |                                                                                                                                                                                                                                                        | scaffold_5_mRNA_1771.1           | -                           | -                               |
| GF0029807 | 1                             | 0                        | 0                            | 0 Cytokinin riboside 5'-monophosphate phosphoribohydrolase (1)                          |                                                                                                                                                                                                                                                                                                                                                  | LOG family [IPR031100] (1)                                                                                                                                                                                                                             | scaffold_5_mRNA_1770.1           | -                           | -                               |
| GF0029806 | 1                             | 0                        | 0                            | 0 Hypothetical protein (1)                                                              |                                                                                                                                                                                                                                                                                                                                                  |                                                                                                                                                                                                                                                        | scaffold_5_mRNA_1765.1           | -                           | -                               |
| GF0029805 | 1                             | 0                        | 0                            | 0 Hypothetical protein (1)                                                              |                                                                                                                                                                                                                                                                                                                                                  |                                                                                                                                                                                                                                                        | scaffold_5_mRNA_1760.1           | -                           | -                               |
| GF0029804 | 1                             | 0                        | 0                            | 0 Hypothetical protein (1)                                                              |                                                                                                                                                                                                                                                                                                                                                  | Retrotransposon gag domain [IPR005162] (1)                                                                                                                                                                                                             | scaffold_5_mRNA_1755.1           | -                           | -                               |
| GF0029803 | 1                             | 0                        | 0                            | 0 Hypothetical protein (1)                                                              |                                                                                                                                                                                                                                                                                                                                                  |                                                                                                                                                                                                                                                        | scaffold_5_mRNA_1746.1           | -                           | -                               |
| GF0029802 | 1                             | 0                        | 0                            | 0 Hypothetical protein (1)                                                              |                                                                                                                                                                                                                                                                                                                                                  |                                                                                                                                                                                                                                                        | scaffold_5_mRNA_1745.1           | -                           | -                               |
| GF0029801 | 1                             | 0                        | 0                            | 0 Cytokinin riboside 5'-monophosphate phosphoribohydrolase (1)                          |                                                                                                                                                                                                                                                                                                                                                  | Cytokinin riboside 5'-monophosphate phosphoribohydrolase LOG [IPR005269] (1); LOG family [IPR031100] (1)                                                                                                                                               | scaffold_5_mRNA_1744.1           | -                           | -                               |
| GF0029800 | 1                             | 0                        | 0                            | 0 Cytokinin riboside 5'-monophosphate phosphoribohydrolase (1)                          |                                                                                                                                                                                                                                                                                                                                                  | LOG family [IPR031100] (1)                                                                                                                                                                                                                             | scaffold_5_mRNA_1743.1           | -                           | -                               |
| GF0029799 | 1                             | 0                        | 0                            | 0 Hypothetical protein (1)                                                              |                                                                                                                                                                                                                                                                                                                                                  |                                                                                                                                                                                                                                                        | scaffold_5_mRNA_1742.1           | -                           | -                               |
| GF0029798 | 1                             | 0                        | 0                            | 0 Hypothetical protein (1)                                                              |                                                                                                                                                                                                                                                                                                                                                  |                                                                                                                                                                                                                                                        | scaffold_5_mRNA_1740.1           | -                           | -                               |
| GF0029797 | 1                             | 0                        | 0                            | 0 Hypothetical protein (1)                                                              | DNA binding [GO:0003677 molecular_function] (1); protein dimerization activity [GO:0046983 molecular_function] (1); nucleic acid binding [GO:0003676 molecular_function] (1)                                                                                                                                                                     | Ribonuclease H-like domain [IPR012337] (1); HAT-like transposase, RNase-H fold [IPR025525] (1); Major facilitator superfamily domain [IPR020846] (1); HAT, C-terminal dimerisation domain [IPR008906] (1)                                              | scaffold_5_mRNA_174.1            | -                           | -                               |
| GF0029796 | 1                             | 0                        | 0                            | 0 Hypothetical protein (1)                                                              |                                                                                                                                                                                                                                                                                                                                                  |                                                                                                                                                                                                                                                        | scaffold_5_mRNA_1738.1           | -                           | -                               |
| GF0029795 | 1                             | 0                        | 0                            | 0 Hypothetical protein (1)                                                              |                                                                                                                                                                                                                                                                                                                                                  |                                                                                                                                                                                                                                                        | scaffold_5_mRNA_1736.1           | -                           | -                               |
| GF0029794 | 1                             | 0                        | 0                            | 0 Hypothetical protein (1)                                                              |                                                                                                                                                                                                                                                                                                                                                  |                                                                                                                                                                                                                                                        | scaffold_5_mRNA_1733.1           | -                           | -                               |
| GF0029793 | 1                             | 0                        | 0                            | 0 Cytokinin riboside 5'-monophosphate phosphoribohydrolase (1)                          |                                                                                                                                                                                                                                                                                                                                                  | LOG family [IPR031100] (1)                                                                                                                                                                                                                             | scaffold_5_mRNA_1730.1           | -                           | -                               |
| GF0029792 | 1                             | 0                        | 0                            | 0 Hypothetical protein (1)                                                              |                                                                                                                                                                                                                                                                                                                                                  |                                                                                                                                                                                                                                                        | scaffold_5_mRNA_1729.1           | -                           | -                               |
| GF0029791 | 1                             | 0                        | 0                            | 0 Hypothetical protein (1)                                                              |                                                                                                                                                                                                                                                                                                                                                  |                                                                                                                                                                                                                                                        | scaffold_5_mRNA_1726.1           | -                           | -                               |
| GF0029790 | 1                             | 0                        | 0                            | 0 Hypothetical protein (1)                                                              |                                                                                                                                                                                                                                                                                                                                                  |                                                                                                                                                                                                                                                        | scaffold_5_mRNA_1720.1           | -                           | -                               |
| GF0029789 | 1                             | 0                        | 0                            | 0 Hypothetical protein (1)                                                              |                                                                                                                                                                                                                                                                                                                                                  |                                                                                                                                                                                                                                                        | scaffold_5_mRNA_172.1            | -                           | -                               |
| GF0029788 | 1                             | 0                        | 0                            | 0 Hypothetical protein (1)                                                              |                                                                                                                                                                                                                                                                                                                                                  |                                                                                                                                                                                                                                                        | scaffold_5_mRNA_1719.1           | -                           | -                               |
| GF0029787 | 1                             | 0                        | 0                            | 0 Hypothetical protein (1)                                                              |                                                                                                                                                                                                                                                                                                                                                  |                                                                                                                                                                                                                                                        | scaffold_5_mRNA_1702.1           | -                           | -                               |
| GF0029786 | 1                             | 0                        | 0                            | 0 Hypothetical protein (1)                                                              |                                                                                                                                                                                                                                                                                                                                                  |                                                                                                                                                                                                                                                        | scaffold_5_mRNA_1700.1           | -                           | -                               |
| GF0029785 | 1                             | 0                        | 0                            | 0 Hypothetical protein (1)                                                              |                                                                                                                                                                                                                                                                                                                                                  |                                                                                                                                                                                                                                                        | scaffold_5_mRNA_1699.1           | -                           | -                               |
| GF0029784 | 1                             | 0                        | 0                            | 0 Hypothetical protein (1)                                                              | GTP biosynthetic process [GO:0006183 biological_process] (1); nucleoside diphosphate kinase activity [GO:0004550 molecular_function] (1); nucleoside diphosphate phosphorylation [GO:0006165 biological_process] (1); UTP biosynthetic process [GO:0006228 biological_process] (1); CTP biosynthetic process [GO:0006241 biological_process] (1) | Nucleoside diphosphate kinase [IPR001564] (1)                                                                                                                                                                                                          | scaffold_5_mRNA_1680.1           | -                           | -                               |
| GF0029783 | 1                             | 0                        | 0                            | 0 Hypothetical protein (1)                                                              |                                                                                                                                                                                                                                                                                                                                                  |                                                                                                                                                                                                                                                        | scaffold_5_mRNA_168.1            | -                           | -                               |
| GF0029782 | 1                             | 0                        | 0                            | 0 Hypothetical protein (1)                                                              |                                                                                                                                                                                                                                                                                                                                                  |                                                                                                                                                                                                                                                        | scaffold_5_mRNA_1678.1           | -                           | -                               |
| GF0029781 | 1                             | 0                        | 0                            | 0 Hypothetical protein (1)                                                              |                                                                                                                                                                                                                                                                                                                                                  |                                                                                                                                                                                                                                                        | scaffold_5_mRNA_1674.1           | -                           | -                               |
| GF0029780 | 1                             | 0                        | 0                            | 0 Hypothetical protein (1)                                                              |                                                                                                                                                                                                                                                                                                                                                  |                                                                                                                                                                                                                                                        | scaffold_5_mRNA_1673.1           | -                           | -                               |
| GF0029779 | 1                             | 0                        | 0                            | 0 Retrotransposon gag protein (1)                                                       |                                                                                                                                                                                                                                                                                                                                                  |                                                                                                                                                                                                                                                        | scaffold_5_mRNA_1671.1           | -                           | -                               |
| GF0029778 | 1                             | 0                        | 0                            | 0 Hypothetical protein (1)                                                              |                                                                                                                                                                                                                                                                                                                                                  |                                                                                                                                                                                                                                                        | scaffold_5_mRNA_1669.1           | -                           | -                               |
| GF0029777 | 1                             | 0                        | 0                            | 0 Hypothetical protein (1)                                                              |                                                                                                                                                                                                                                                                                                                                                  | Viral movement protein [IPR028919] (1)                                                                                                                                                                                                                 | scaffold_5_mRNA_1665.1           | -                           | -                               |
| GF0029776 | 1                             | 0                        | 0                            | 0 Hypothetical protein (1)                                                              |                                                                                                                                                                                                                                                                                                                                                  |                                                                                                                                                                                                                                                        | scaffold_5_mRNA_1664.1           | -                           | -                               |
| GF0029775 | 1                             | 0                        | 0                            | 0 Hypothetical protein (1)                                                              |                                                                                                                                                                                                                                                                                                                                                  |                                                                                                                                                                                                                                                        | scaffold_5_mRNA_1659.1           | -                           | -                               |
| GF0029774 | 1                             | 0                        | 0                            | 0 Hypothetical protein (1)                                                              |                                                                                                                                                                                                                                                                                                                                                  | Viral movement protein [IPR028919] (1)                                                                                                                                                                                                                 | scaffold_5_mRNA_1653.1           | -                           | -                               |
| GF0029773 | 1                             | 0                        | 0                            | 0 Hypothetical protein (1)                                                              |                                                                                                                                                                                                                                                                                                                                                  |                                                                                                                                                                                                                                                        | scaffold_5_mRNA_1651.1           | -                           | -                               |
| GF0029772 | 1                             | 0                        | 0                            | 0 Cytokinin riboside 5'-monophosphate phosphoribohydrolase (1)                          |                                                                                                                                                                                                                                                                                                                                                  | LOG family [IPR031100] (1)                                                                                                                                                                                                                             | scaffold_5_mRNA_1650.1           | -                           | -                               |
| GF0029771 | 1                             | 0                        | 0                            | 0 Hypothetical protein (1)                                                              |                                                                                                                                                                                                                                                                                                                                                  |                                                                                                                                                                                                                                                        | scaffold_5_mRNA_1643.1           | -                           | -                               |
| GF0029770 | 1                             | 0                        | 0                            | 0 Hypothetical protein (1)                                                              |                                                                                                                                                                                                                                                                                                                                                  |                                                                                                                                                                                                                                                        | scaffold_5_mRNA_1642.1           | -                           | -                               |
| GF0029769 | 1                             | 0                        | 0                            | 0 Hypothetical protein (1)                                                              |                                                                                                                                                                                                                                                                                                                                                  | Retrotransposon gag domain [IPR005162] (1)                                                                                                                                                                                                             | scaffold_5_mRNA_1640.1           | -                           | -                               |
| GF0029768 | 1                             | 0                        | 0                            | 0 Hypothetical protein (1)                                                              |                                                                                                                                                                                                                                                                                                                                                  |                                                                                                                                                                                                                                                        | scaffold_5_mRNA_1639.1           | -                           | -                               |
| GF0029767 | 1                             | 0                        | 0                            | 0 Hypothetical protein (1)                                                              |                                                                                                                                                                                                                                                                                                                                                  |                                                                                                                                                                                                                                                        | scaffold_5_mRNA_1636.1           | -                           | -                               |
| GF0029766 | 1                             | 0                        | 0                            | 0 Hypothetical protein (1)                                                              |                                                                                                                                                                                                                                                                                                                                                  |                                                                                                                                                                                                                                                        | scaffold_5_mRNA_1635.1           | -                           | -                               |
| GF0029765 | 1                             | 0                        | 0                            | 0 Hypothetical protein (1)                                                              |                                                                                                                                                                                                                                                                                                                                                  |                                                                                                                                                                                                                                                        | scaffold_5_mRNA_1634.1           | -                           | -                               |
| GF0029764 | 1                             | 0                        | 0                            | 0 Hypothetical protein (1)                                                              |                                                                                                                                                                                                                                                                                                                                                  |                                                                                                                                                                                                                                                        | scaffold_5_mRNA_1631.1           | -                           | -                               |
| GF0029763 | 1                             | 0                        | 0                            | 0 Hypothetical protein (1)                                                              |                                                                                                                                                                                                                                                                                                                                                  |                                                                                                                                                                                                                                                        | scaffold_5_mRNA_1630.1           | -                           | -                               |
| GF0029762 | 1                             | 0                        | 0                            | 0 Hypothetical protein (1)                                                              |                                                                                                                                                                                                                                                                                                                                                  | Viral movement protein [IPR028919] (1)                                                                                                                                                                                                                 | scaffold_5_mRNA_1628.1           | -                           | -                               |
| GF0029761 | 1                             | 0                        | 0                            | 0 Hypothetical protein (1)                                                              |                                                                                                                                                                                                                                                                                                                                                  |                                                                                                                                                                                                                                                        | scaffold_5_mRNA_1627.1           | -                           | -                               |
| GF0029760 | 1                             | 0                        | 0                            | 0 Hypothetical protein (1)                                                              |                                                                                                                                                                                                                                                                                                                                                  |                                                                                                                                                                                                                                                        | scaffold_5_mRNA_1624.1           | -                           | -                               |
| GF0029759 | 1                             | 0                        | 0                            | 0 Hypothetical protein (1)                                                              |                                                                                                                                                                                                                                                                                                                                                  |                                                                                                                                                                                                                                                        | scaffold_5_mRNA_1623.1           | -                           | -                               |
| GF0029758 | 1                             | 0                        | 0                            | 0 Hypothetical protein (1)                                                              |                                                                                                                                                                                                                                                                                                                                                  |                                                                                                                                                                                                                                                        | scaffold_5_mRNA_1621.1           | -                           | -                               |
| GF0029757 | 1                             | 0                        | 0                            | 0 Hypothetical protein (1)                                                              |                                                                                                                                                                                                                                                                                                                                                  |                                                                                                                                                                                                                                                        | scaffold_5_mRNA_1620.1           | -                           | -                               |
| GF0029756 | 1                             | 0                        | 0                            | 0 Putative polyprotein (Aspartic proteinase, reverse transcriptase, ribonuclease H) (1) |                                                                                                                                                                                                                                                                                                                                                  | Reverse transcriptase domain [IPR000477] (1)                                                                                                                                                                                                           | scaffold_5_mRNA_1619.1           | -                           | -                               |

| ID        | Num. in <i>C. caryophyllata</i> | Num. in <i>C. uchiha</i> | Num. in <i>P. trifoliata</i> | Note                                                               | GO                                                                                                                                                                                                                                        | InterPro                                                                                                                                                                      | Members in <i>C. caryophyllata</i> | Members in <i>C. uchiha</i> | Members in <i>P. trifoliata</i> |
|-----------|---------------------------------|--------------------------|------------------------------|--------------------------------------------------------------------|-------------------------------------------------------------------------------------------------------------------------------------------------------------------------------------------------------------------------------------------|-------------------------------------------------------------------------------------------------------------------------------------------------------------------------------|------------------------------------|-----------------------------|---------------------------------|
| GF0029755 | 1                               | 0                        | 0                            | 0 Hypothetical protein (1)                                         |                                                                                                                                                                                                                                           |                                                                                                                                                                               | scaffold_5_mRNA_1618.1             | -                           | -                               |
| GF0029754 | 1                               | 0                        | 0                            | 0 Hypothetical protein (1)                                         |                                                                                                                                                                                                                                           |                                                                                                                                                                               | scaffold_5_mRNA_1617.1             | -                           | -                               |
| GF0029753 | 1                               | 0                        | 0                            | 0 Hypothetical protein (1)                                         |                                                                                                                                                                                                                                           | Reverse transcriptase domain [IPR000477] (1)                                                                                                                                  | scaffold_5_mRNA_1614.1             | -                           | -                               |
| GF0029752 | 1                               | 0                        | 0                            | 0 Hypothetical protein (1)                                         |                                                                                                                                                                                                                                           |                                                                                                                                                                               | scaffold_5_mRNA_1611.1             | -                           | -                               |
| GF0029751 | 1                               | 0                        | 0                            | 0 Hypothetical protein (1)                                         |                                                                                                                                                                                                                                           |                                                                                                                                                                               | scaffold_5_mRNA_1606.1             | -                           | -                               |
| GF0029750 | 1                               | 0                        | 0                            | 0 Hypothetical protein (1)                                         |                                                                                                                                                                                                                                           |                                                                                                                                                                               | scaffold_5_mRNA_1604.1             | -                           | -                               |
| GF0029749 | 1                               | 0                        | 0                            | 0 Hypothetical protein (1)                                         |                                                                                                                                                                                                                                           |                                                                                                                                                                               | scaffold_5_mRNA_1603.1             | -                           | -                               |
| GF0029748 | 1                               | 0                        | 0                            | 0 Hypothetical protein (1)                                         |                                                                                                                                                                                                                                           | Histone deacetylase superfamily [IPR00286] (1); Histone deacetylase domain [IPR023801] (1)                                                                                    | scaffold_5_mRNA_16.1               | -                           | -                               |
| GF0029747 | 1                               | 0                        | 0                            | 0 Hypothetical protein (1)                                         |                                                                                                                                                                                                                                           | Reverse transcriptase domain [IPR000477] (1)                                                                                                                                  | scaffold_5_mRNA_1598.1             | -                           | -                               |
| GF0029746 | 1                               | 0                        | 0                            | 0 Hypothetical protein (1)                                         |                                                                                                                                                                                                                                           |                                                                                                                                                                               | scaffold_5_mRNA_1597.1             | -                           | -                               |
| GF0029745 | 1                               | 0                        | 0                            | 0 Hypothetical protein (1)                                         |                                                                                                                                                                                                                                           |                                                                                                                                                                               | scaffold_5_mRNA_1592.1             | -                           | -                               |
| GF0029744 | 1                               | 0                        | 0                            | 0 Hypothetical protein (1)                                         |                                                                                                                                                                                                                                           | LOG family [IPR031100] (1)                                                                                                                                                    | scaffold_5_mRNA_1591.1             | -                           | -                               |
| GF0029743 | 1                               | 0                        | 0                            | 0 Hypothetical protein (1)                                         |                                                                                                                                                                                                                                           |                                                                                                                                                                               | scaffold_5_mRNA_159.1              | -                           | -                               |
| GF0029742 | 1                               | 0                        | 0                            | 0 Hypothetical protein (1)                                         |                                                                                                                                                                                                                                           |                                                                                                                                                                               | scaffold_5_mRNA_1585.1             | -                           | -                               |
| GF0029741 | 1                               | 0                        | 0                            | 0 Hypothetical protein (1)                                         |                                                                                                                                                                                                                                           | Viral movement protein [IPR028919] (1)                                                                                                                                        | scaffold_5_mRNA_1584.1             | -                           | -                               |
| GF0029740 | 1                               | 0                        | 0                            | 0 Hypothetical protein (1)                                         | nucleic acid binding [GO:0003676 molecular_function] (1); proteolysis [GO:0006508 biological_process] (1); zinc ion binding [GO:0008270 molecular_function] (1); aspartic-type endopeptidase activity [GO:0004190 molecular_function] (1) | Zinc finger, CCHC-type [IPR001878] (1); Aspartic peptidase, active site [IPR001969] (1)                                                                                       | scaffold_5_mRNA_1582.1             | -                           | -                               |
| GF0029739 | 1                               | 0                        | 0                            | 0 Hypothetical protein (1)                                         |                                                                                                                                                                                                                                           | Viral movement protein [IPR028919] (1)                                                                                                                                        | scaffold_5_mRNA_1581.1             | -                           | -                               |
| GF0029738 | 1                               | 0                        | 0                            | 0 Hypothetical protein (1)                                         |                                                                                                                                                                                                                                           | Viral movement protein [IPR028919] (1)                                                                                                                                        | scaffold_5_mRNA_1580.1             | -                           | -                               |
| GF0029737 | 1                               | 0                        | 0                            | 0 Hypothetical protein (1)                                         |                                                                                                                                                                                                                                           |                                                                                                                                                                               | scaffold_5_mRNA_1572.1             | -                           | -                               |
| GF0029736 | 1                               | 0                        | 0                            | 0 Hypothetical protein (1)                                         |                                                                                                                                                                                                                                           |                                                                                                                                                                               | scaffold_5_mRNA_1569.1             | -                           | -                               |
| GF0029735 | 1                               | 0                        | 0                            | 0 Hypothetical protein (1)                                         | aspartic-type endopeptidase activity [GO:0004190 molecular_function] (1); proteolysis [GO:0006508 biological_process] (1)                                                                                                                 | Retroposins [IPR018061] (1); Aspartic peptidase, active site [IPR001969] (1); Peptidase A2A, retrovirus, catalytic [IPR001995] (1); Aspartic peptidase domain [IPR021109] (1) | scaffold_5_mRNA_1568.1             | -                           | -                               |
| GF0029734 | 1                               | 0                        | 0                            | 0 Hypothetical protein (1)                                         |                                                                                                                                                                                                                                           |                                                                                                                                                                               | scaffold_5_mRNA_1565.1             | -                           | -                               |
| GF0029733 | 1                               | 0                        | 0                            | 0 Hypothetical protein (1)                                         | nucleic acid binding [GO:0003676 molecular_function] (1); zinc ion binding [GO:0008270 molecular_function] (1)                                                                                                                            | Zinc finger, CCHC-type [IPR001878] (1)                                                                                                                                        | scaffold_5_mRNA_1562.1             | -                           | -                               |
| GF0029732 | 1                               | 0                        | 0                            | 0 Hypothetical protein (1)                                         |                                                                                                                                                                                                                                           |                                                                                                                                                                               | scaffold_5_mRNA_1561.1             | -                           | -                               |
| GF0029731 | 1                               | 0                        | 0                            | 0 Hypothetical protein (1)                                         |                                                                                                                                                                                                                                           |                                                                                                                                                                               | scaffold_5_mRNA_1560.1             | -                           | -                               |
| GF0029730 | 1                               | 0                        | 0                            | 0 Hypothetical protein (1)                                         |                                                                                                                                                                                                                                           |                                                                                                                                                                               | scaffold_5_mRNA_1556.1             | -                           | -                               |
| GF0029729 | 1                               | 0                        | 0                            | 0 Hypothetical protein (1)                                         |                                                                                                                                                                                                                                           |                                                                                                                                                                               | scaffold_5_mRNA_1555.1             | -                           | -                               |
| GF0029728 | 1                               | 0                        | 0                            | 0 Hypothetical protein (1)                                         |                                                                                                                                                                                                                                           |                                                                                                                                                                               | scaffold_5_mRNA_1552.1             | -                           | -                               |
| GF0029727 | 1                               | 0                        | 0                            | 0 Hypothetical protein (1)                                         |                                                                                                                                                                                                                                           | Viral movement protein [IPR028919] (1)                                                                                                                                        | scaffold_5_mRNA_1551.1             | -                           | -                               |
| GF0029726 | 1                               | 0                        | 0                            | 0 Hypothetical protein (1)                                         | nucleic acid binding [GO:0003676 molecular_function] (1); proteolysis [GO:0006508 biological_process] (1); zinc ion binding [GO:0008270 molecular_function] (1); aspartic-type endopeptidase activity [GO:0004190 molecular_function] (1) | Peptidase A2A, retrovirus, catalytic [IPR001995] (1); Aspartic peptidase, active site [IPR001969] (1); Zinc finger, CCHC-type [IPR001878] (1)                                 | scaffold_5_mRNA_1549.1             | -                           | -                               |
| GF0029725 | 1                               | 0                        | 0                            | 0 Hypothetical protein (1)                                         |                                                                                                                                                                                                                                           |                                                                                                                                                                               | scaffold_5_mRNA_1548.1             | -                           | -                               |
| GF0029724 | 1                               | 0                        | 0                            | 0 Hypothetical protein (1)                                         |                                                                                                                                                                                                                                           |                                                                                                                                                                               | scaffold_5_mRNA_1544.1             | -                           | -                               |
| GF0029723 | 1                               | 0                        | 0                            | 0 Hypothetical protein (1)                                         | aspartic-type endopeptidase activity [GO:0004190 molecular_function] (1); proteolysis [GO:0006508 biological_process] (1)                                                                                                                 | Aspartic peptidase, active site [IPR001969] (1); Peptidase A2A, retrovirus, catalytic [IPR001995] (1)                                                                         | scaffold_5_mRNA_1543.1             | -                           | -                               |
| GF0029722 | 1                               | 0                        | 0                            | 0 Hypothetical protein (1)                                         |                                                                                                                                                                                                                                           | Viral movement protein [IPR028919] (1)                                                                                                                                        | scaffold_5_mRNA_1542.1             | -                           | -                               |
| GF0029721 | 1                               | 0                        | 0                            | 0 Hypothetical protein (1)                                         |                                                                                                                                                                                                                                           |                                                                                                                                                                               | scaffold_5_mRNA_1541.1             | -                           | -                               |
| GF0029720 | 1                               | 0                        | 0                            | 0 Hypothetical protein (1)                                         |                                                                                                                                                                                                                                           |                                                                                                                                                                               | scaffold_5_mRNA_1537.1             | -                           | -                               |
| GF0029719 | 1                               | 0                        | 0                            | 0 Hypothetical protein (1)                                         | nucleic acid binding [GO:0003676 molecular_function] (1); regulation of transcription, DNA-templated [GO:0006355 biological_process] (1)                                                                                                  | Carlavirus nucleic acid-binding protein [IPR02568] (1)                                                                                                                        | scaffold_5_mRNA_1536.1             | -                           | -                               |
| GF0029718 | 1                               | 0                        | 0                            | 0 Cytokinin riboside 5'-monophosphate phosphoribohydrolase (1)     |                                                                                                                                                                                                                                           | LOG family [IPR031100] (1)                                                                                                                                                    | scaffold_5_mRNA_1535.1             | -                           | -                               |
| GF0029717 | 1                               | 0                        | 0                            | 0 Hypothetical protein (1)                                         |                                                                                                                                                                                                                                           | Reverse transcriptase domain [IPR000477] (1)                                                                                                                                  | scaffold_5_mRNA_1534.1             | -                           | -                               |
| GF0029716 | 1                               | 0                        | 0                            | 0 Cytokinin riboside 5'-monophosphate phosphoribohydrolase (1)     |                                                                                                                                                                                                                                           | LOG family [IPR031100] (1)                                                                                                                                                    | scaffold_5_mRNA_1533.1             | -                           | -                               |
| GF0029715 | 1                               | 0                        | 0                            | 0 Hypothetical protein (1)                                         |                                                                                                                                                                                                                                           |                                                                                                                                                                               | scaffold_5_mRNA_1532.1             | -                           | -                               |
| GF0029714 | 1                               | 0                        | 0                            | 0 Hypothetical protein (1)                                         |                                                                                                                                                                                                                                           |                                                                                                                                                                               | scaffold_5_mRNA_1531.1             | -                           | -                               |
| GF0029713 | 1                               | 0                        | 0                            | 0 Hypothetical protein (1)                                         |                                                                                                                                                                                                                                           |                                                                                                                                                                               | scaffold_5_mRNA_1530.1             | -                           | -                               |
| GF0029712 | 1                               | 0                        | 0                            | 0 Hypothetical protein (1)                                         | UZAF [GO:0089701 cellular_component] (1); RNA binding [GO:0003723 molecular_function] (1); mRNA splicing via spliceosome [GO:0000398 biological_process] (1)                                                                              | U2 auxiliary factor small subunit [IPR009145] (1)                                                                                                                             | scaffold_5_mRNA_153.1              | -                           | -                               |
| GF0029711 | 1                               | 0                        | 0                            | 0 Hypothetical protein (1)                                         |                                                                                                                                                                                                                                           |                                                                                                                                                                               | scaffold_5_mRNA_1522.1             | -                           | -                               |
| GF0029710 | 1                               | 0                        | 0                            | 0 Integrase (1)                                                    |                                                                                                                                                                                                                                           | Aspartic peptidase domain [IPR021109] (1)                                                                                                                                     | scaffold_5_mRNA_1521.1             | -                           | -                               |
| GF0029709 | 1                               | 0                        | 0                            | 0 Hypothetical protein (1)                                         |                                                                                                                                                                                                                                           |                                                                                                                                                                               | scaffold_5_mRNA_1520.1             | -                           | -                               |
| GF0029708 | 1                               | 0                        | 0                            | 0 Enhanced disease susceptibility 1 (1)                            | lipid metabolic process [GO:0006629 biological_process] (1)                                                                                                                                                                               | Fungal lipase-like domain [IPR002921] (1); Alpha Beta hydrolase fold [IPR029058] (1)                                                                                          | scaffold_5_mRNA_152.1              | -                           | -                               |
| GF0029707 | 1                               | 0                        | 0                            | 0 Retrotransposon gag protein (1)                                  |                                                                                                                                                                                                                                           | Retrotransposon gag domain [IPR005162] (1)                                                                                                                                    | scaffold_5_mRNA_1518.1             | -                           | -                               |
| GF0029706 | 1                               | 0                        | 0                            | 0 Hypothetical protein (1)                                         |                                                                                                                                                                                                                                           |                                                                                                                                                                               | scaffold_5_mRNA_1515.1             | -                           | -                               |
| GF0029705 | 1                               | 0                        | 0                            | 0 Nodulin MN21 FcmaA-like transporter family protein isoform 3 (1) |                                                                                                                                                                                                                                           | Sugar phosphate transporter domain [IPR004853] (1)                                                                                                                            | scaffold_5_mRNA_1513.1             | -                           | -                               |
| GF0029704 | 1                               | 0                        | 0                            | 0 Hypothetical protein (1)                                         |                                                                                                                                                                                                                                           |                                                                                                                                                                               | scaffold_5_mRNA_1512.1             | -                           | -                               |
| GF0029703 | 1                               | 0                        | 0                            | 0 Hypothetical protein (1)                                         |                                                                                                                                                                                                                                           |                                                                                                                                                                               | scaffold_5_mRNA_1509.1             | -                           | -                               |
| GF0029702 | 1                               | 0                        | 0                            | 0 Cytokinin riboside 5'-monophosphate phosphoribohydrolase (1)     |                                                                                                                                                                                                                                           | LOG family [IPR031100] (1); Cytokinin riboside 5'-monophosphate phosphoribohydrolase LOG [IPR005269] (1)                                                                      | scaffold_5_mRNA_1507.1             | -                           | -                               |
| GF0029701 | 1                               | 0                        | 0                            | 0 Hypothetical protein (1)                                         |                                                                                                                                                                                                                                           |                                                                                                                                                                               | scaffold_5_mRNA_1506.1             | -                           | -                               |
| GF0029700 | 1                               | 0                        | 0                            | 0 Hypothetical protein (1)                                         |                                                                                                                                                                                                                                           | Aspartic peptidase domain [IPR021109] (1)                                                                                                                                     | scaffold_5_mRNA_1505.1             | -                           | -                               |
| GF0029699 | 1                               | 0                        | 0                            | 0 Hypothetical protein (1)                                         |                                                                                                                                                                                                                                           |                                                                                                                                                                               | scaffold_5_mRNA_1504.1             | -                           | -                               |
| GF0029698 | 1                               | 0                        | 0                            | 0 Integrase (1)                                                    |                                                                                                                                                                                                                                           | LOG family [IPR031100] (1); Aspartic peptidase domain [IPR021109] (1)                                                                                                         | scaffold_5_mRNA_1501.1             | -                           | -                               |
| GF0029697 | 1                               | 0                        | 0                            | 0 Hypothetical protein (1)                                         |                                                                                                                                                                                                                                           |                                                                                                                                                                               | scaffold_5_mRNA_150.1              | -                           | -                               |
| GF0029696 | 1                               | 0                        | 0                            | 0 Hypothetical protein (1)                                         |                                                                                                                                                                                                                                           |                                                                                                                                                                               | scaffold_5_mRNA_15.1               | -                           | -                               |
| GF0029695 | 1                               | 0                        | 0                            | 0 Hypothetical protein (1)                                         |                                                                                                                                                                                                                                           |                                                                                                                                                                               | scaffold_5_mRNA_1497.1             | -                           | -                               |
| GF0029694 | 1                               | 0                        | 0                            | 0 Hypothetical protein (1)                                         |                                                                                                                                                                                                                                           | Retrotransposon gag domain [IPR005162] (1)                                                                                                                                    | scaffold_5_mRNA_1496.1             | -                           | -                               |
| GF0029693 | 1                               | 0                        | 0                            | 0 Hypothetical protein (1)                                         |                                                                                                                                                                                                                                           | LOG family [IPR031100] (1); Cytokinin riboside 5'-monophosphate phosphoribohydrolase LOG [IPR005269] (1)                                                                      | scaffold_5_mRNA_1495.1             | -                           | -                               |
| GF0029692 | 1                               | 0                        | 0                            | 0 Cytokinin riboside 5'-monophosphate phosphoribohydrolase (1)     |                                                                                                                                                                                                                                           | LOG family [IPR031100] (1)                                                                                                                                                    | scaffold_5_mRNA_1491.1             | -                           | -                               |
| GF0029691 | 1                               | 0                        | 0                            | 0 Hypothetical protein (1)                                         |                                                                                                                                                                                                                                           |                                                                                                                                                                               | scaffold_5_mRNA_1490.1             | -                           | -                               |
| GF0029690 | 1                               | 0                        | 0                            | 0 Hypothetical protein (1)                                         |                                                                                                                                                                                                                                           |                                                                                                                                                                               | scaffold_5_mRNA_1484.1             | -                           | -                               |
| GF0029689 | 1                               | 0                        | 0                            | 0 Cytokinin riboside 5'-monophosphate phosphoribohydrolase (1)     |                                                                                                                                                                                                                                           | LOG family [IPR031100] (1)                                                                                                                                                    | scaffold_5_mRNA_1483.1             | -                           | -                               |
| GF0029688 | 1                               | 0                        | 0                            | 0 Cytokinin riboside 5'-monophosphate phosphoribohydrolase (1)     |                                                                                                                                                                                                                                           | LOG family [IPR031100] (1)                                                                                                                                                    | scaffold_5_mRNA_1482.1             | -                           | -                               |
| GF0029687 | 1                               | 0                        | 0                            | 0 Hypothetical protein (1)                                         |                                                                                                                                                                                                                                           |                                                                                                                                                                               | scaffold_5_mRNA_1481.1             | -                           | -                               |
| GF0029686 | 1                               | 0                        | 0                            | 0 Hypothetical protein (1)                                         |                                                                                                                                                                                                                                           |                                                                                                                                                                               | scaffold_5_mRNA_1480.1             | -                           | -                               |
| GF0029685 | 1                               | 0                        | 0                            | 0 Hypothetical protein (1)                                         |                                                                                                                                                                                                                                           |                                                                                                                                                                               | scaffold_5_mRNA_1479.1             | -                           | -                               |
| GF0029684 | 1                               | 0                        | 0                            | 0 Hypothetical protein (1)                                         |                                                                                                                                                                                                                                           |                                                                                                                                                                               | scaffold_5_mRNA_1478.1             | -                           | -                               |
| GF0029683 | 1                               | 0                        | 0                            | 0 Hypothetical protein (1)                                         |                                                                                                                                                                                                                                           |                                                                                                                                                                               | scaffold_5_mRNA_1476.1             | -                           | -                               |
| GF0029682 | 1                               | 0                        | 0                            | 0 Hypothetical protein (1)                                         |                                                                                                                                                                                                                                           |                                                                                                                                                                               | scaffold_5_mRNA_1475.1             | -                           | -                               |
| GF0029681 | 1                               | 0                        | 0                            | 0 Hypothetical protein (1)                                         | nucleic acid binding [GO:0003676 molecular_function] (1)                                                                                                                                                                                  | Ribonuclease H-like domain [IPR012337] (1)                                                                                                                                    | scaffold_5_mRNA_1472.1             | -                           | -                               |
| GF0029680 | 1                               | 0                        | 0                            | 0 LRR receptor-like kinase family protein (1)                      | protein binding [GO:0005515 molecular_function] (1)                                                                                                                                                                                       | Leucine-rich repeat domain, L domain-like [IPR032675] (1); Leucine-rich repeat [IPR01611] (1); Leucine-rich repeat-containing N-terminal, plant-type [IPR013210] (1)          | scaffold_5_mRNA_147.1              | -                           | -                               |
| GF0029679 | 1                               | 0                        | 0                            | 0 Cytokinin riboside 5'-monophosphate phosphoribohydrolase (1)     |                                                                                                                                                                                                                                           | Cytokinin riboside 5'-monophosphate phosphoribohydrolase LOG [IPR005269] (1); LOG family [IPR031100] (1)                                                                      | scaffold_5_mRNA_1466.1             | -                           | -                               |
| GF0029678 | 1                               | 0                        | 0                            | 0 Hypothetical protein (1)                                         |                                                                                                                                                                                                                                           |                                                                                                                                                                               | scaffold_5_mRNA_1465.1             | -                           | -                               |
| GF0029677 | 1                               | 0                        | 0                            | 0 Hypothetical protein (1)                                         |                                                                                                                                                                                                                                           |                                                                                                                                                                               | scaffold_5_mRNA_1464.1             | -                           | -                               |

| ID        | Num. in <i>C. clementiae</i> | Num. in <i>C. uchiha</i> | Num. in <i>P. trifoliata</i> | Note                                                          | GO                                                                                                                                                                                                                                          | InterPro                                                                                                                                                                                             | Members in <i>C. clementiae</i> | Members in <i>C. uchiha</i> | Members in <i>P. trifoliata</i> |
|-----------|------------------------------|--------------------------|------------------------------|---------------------------------------------------------------|---------------------------------------------------------------------------------------------------------------------------------------------------------------------------------------------------------------------------------------------|------------------------------------------------------------------------------------------------------------------------------------------------------------------------------------------------------|---------------------------------|-----------------------------|---------------------------------|
| GF0029676 | 1                            | 0                        | 0                            | Cytokinin riboside 5'-monophosphate phosphoribohydrolase (1)  |                                                                                                                                                                                                                                             | LOG family [IPR031100] (1); Cytokinin riboside 5'-monophosphate phosphoribohydrolase LOG [IPR005269] (1)                                                                                             | scaffold_5_mRNA_1463.1          | -                           | -                               |
| GF0029675 | 1                            | 0                        | 0                            | Hypothetical protein (1)                                      |                                                                                                                                                                                                                                             |                                                                                                                                                                                                      | scaffold_5_mRNA_1462.1          | -                           | -                               |
| GF0029674 | 1                            | 0                        | 0                            | Hypothetical protein (1)                                      |                                                                                                                                                                                                                                             |                                                                                                                                                                                                      | scaffold_5_mRNA_1458.1          | -                           | -                               |
| GF0029673 | 1                            | 0                        | 0                            | Hypothetical protein (1)                                      |                                                                                                                                                                                                                                             |                                                                                                                                                                                                      | scaffold_5_mRNA_1445.1          | -                           | -                               |
| GF0029672 | 1                            | 0                        | 0                            | Hypothetical protein (1)                                      |                                                                                                                                                                                                                                             |                                                                                                                                                                                                      | scaffold_5_mRNA_1444.1          | -                           | -                               |
| GF0029671 | 1                            | 0                        | 0                            | Cytokinin riboside 5'-monophosphate phosphoribohydrolase (1)  |                                                                                                                                                                                                                                             | LOG family [IPR031100] (1); Cytokinin riboside 5'-monophosphate phosphoribohydrolase LOG [IPR005269] (1)                                                                                             | scaffold_5_mRNA_1438.1          | -                           | -                               |
| GF0029670 | 1                            | 0                        | 0                            | Cytokinin riboside 5'-monophosphate phosphoribohydrolase (1)  |                                                                                                                                                                                                                                             |                                                                                                                                                                                                      | scaffold_5_mRNA_1437.1          | -                           | -                               |
| GF0029669 | 1                            | 0                        | 0                            | Hypothetical protein (1)                                      |                                                                                                                                                                                                                                             | Transposase-associated domain [IPR029480] (1)                                                                                                                                                        | scaffold_5_mRNA_1431.1          | -                           | -                               |
| GF0029668 | 1                            | 0                        | 0                            | Hypothetical protein (1)                                      | heme binding [GO:0020037 molecular_function] (1); response to oxidative stress [GO:006979 biological_process] (1); peroxidase activity [GO:0004601 molecular_function] (1); oxidation-reduction process [GO:0055114 biological_process] (1) | Haem peroxidase, plant/fungal/bacterial [IPR020164] (1); Peroxidase, active site [IPR019794] (1); Haem peroxidase [IPR000823] (1); Haem peroxidase [IPR010255] (1)                                   | scaffold_5_mRNA_1430.1          | -                           | -                               |
| GF0029667 | 1                            | 0                        | 0                            | Cytokinin riboside 5'-monophosphate phosphoribohydrolase (1)  |                                                                                                                                                                                                                                             | LOG family [IPR031100] (1); Cytokinin riboside 5'-monophosphate phosphoribohydrolase LOG [IPR005269] (1)                                                                                             | scaffold_5_mRNA_1425.1          | -                           | -                               |
| GF0029666 | 1                            | 0                        | 0                            | Hypothetical protein (1)                                      |                                                                                                                                                                                                                                             |                                                                                                                                                                                                      | scaffold_5_mRNA_1424.1          | -                           | -                               |
| GF0029665 | 1                            | 0                        | 0                            | Hypothetical protein (1)                                      |                                                                                                                                                                                                                                             |                                                                                                                                                                                                      | scaffold_5_mRNA_1415.1          | -                           | -                               |
| GF0029664 | 1                            | 0                        | 0                            | Hypothetical protein (1)                                      |                                                                                                                                                                                                                                             |                                                                                                                                                                                                      | scaffold_5_mRNA_1405.1          | -                           | -                               |
| GF0029663 | 1                            | 0                        | 0                            | Hypothetical protein (1)                                      |                                                                                                                                                                                                                                             |                                                                                                                                                                                                      | scaffold_5_mRNA_1404.1          | -                           | -                               |
| GF0029662 | 1                            | 0                        | 0                            | FRS transcription factor family, putative isoform 8 (1)       | regulation of transcription, DNA-templated [GO:0006355 biological_process] (1)                                                                                                                                                              | ARI1 DNA binding domain [IPR004330] (1); FYF3/FAR1 family [IPR031052] (1); MULE transposase domain [IPR018289] (1)                                                                                   | scaffold_5_mRNA_1403.1          | -                           | -                               |
| GF0029661 | 1                            | 0                        | 0                            | Hypothetical protein (1)                                      |                                                                                                                                                                                                                                             |                                                                                                                                                                                                      | scaffold_5_mRNA_1400.1          | -                           | -                               |
| GF0029660 | 1                            | 0                        | 0                            | Hypothetical protein (1)                                      |                                                                                                                                                                                                                                             |                                                                                                                                                                                                      | scaffold_5_mRNA_1396.1          | -                           | -                               |
| GF0029659 | 1                            | 0                        | 0                            | Cytokinin riboside 5'-monophosphate phosphoribohydrolase (1)  |                                                                                                                                                                                                                                             | Cytokinin riboside 5'-monophosphate phosphoribohydrolase LOG [IPR005269] (1); LOG family [IPR031100] (1)                                                                                             | scaffold_5_mRNA_1395.1          | -                           | -                               |
| GF0029658 | 1                            | 0                        | 0                            | TSA: Wollemia nobilis transcribed RNA sequence (1)            |                                                                                                                                                                                                                                             | ArfGTPin homology (AH) domain/BAR domain [IPR027267] (1)                                                                                                                                             | scaffold_5_mRNA_1391.1          | -                           | -                               |
| GF0029657 | 1                            | 0                        | 0                            | Hypothetical protein (1)                                      | DNA integration [GO:0015074 biological_process] (1); nucleic acid binding [GO:0003676 molecular_function] (1)                                                                                                                               | Leucine-rich repeat domain, L domain-like [IPR032675] (1); Integrase, catalytic core [IPR001584] (1); Ribonuclease H-like domain [IPR012337] (1); Domain of unknown function DUF1985 [IPR015410] (1) | scaffold_5_mRNA_1390.1          | -                           | -                               |
| GF0029656 | 1                            | 0                        | 0                            | Hypothetical protein (1)                                      |                                                                                                                                                                                                                                             | Retrosposon gag domain [IPR005162] (1)                                                                                                                                                               | scaffold_5_mRNA_1385.1          | -                           | -                               |
| GF0029655 | 1                            | 0                        | 0                            | Hypothetical protein (1)                                      |                                                                                                                                                                                                                                             |                                                                                                                                                                                                      | scaffold_5_mRNA_1384.1          | -                           | -                               |
| GF0029654 | 1                            | 0                        | 0                            | Hypothetical protein (1)                                      |                                                                                                                                                                                                                                             |                                                                                                                                                                                                      | scaffold_5_mRNA_138.1           | -                           | -                               |
| GF0029653 | 1                            | 0                        | 0                            | Copper chaperone (1)                                          | metal ion transport [GO:0030001 biological_process] (1); metal ion binding [GO:0046872 molecular_function] (1)                                                                                                                              | Heavy metal-associated domain, HMA [IPR006121] (1)                                                                                                                                                   | scaffold_5_mRNA_1379.1          | -                           | -                               |
| GF0029652 | 1                            | 0                        | 0                            | Hypothetical protein (1)                                      |                                                                                                                                                                                                                                             | Aspartic peptidase domain [IPR021109] (1)                                                                                                                                                            | scaffold_5_mRNA_1377.1          | -                           | -                               |
| GF0029651 | 1                            | 0                        | 0                            | Hypothetical protein (1)                                      |                                                                                                                                                                                                                                             |                                                                                                                                                                                                      | scaffold_5_mRNA_1372.1          | -                           | -                               |
| GF0029650 | 1                            | 0                        | 0                            | Hypothetical protein (1)                                      |                                                                                                                                                                                                                                             |                                                                                                                                                                                                      | scaffold_5_mRNA_1367.1          | -                           | -                               |
| GF0029649 | 1                            | 0                        | 0                            | Hypothetical protein (1)                                      |                                                                                                                                                                                                                                             |                                                                                                                                                                                                      | scaffold_5_mRNA_1365.1          | -                           | -                               |
| GF0029648 | 1                            | 0                        | 0                            | Hypothetical protein (1)                                      |                                                                                                                                                                                                                                             |                                                                                                                                                                                                      | scaffold_5_mRNA_1363.1          | -                           | -                               |
| GF0029647 | 1                            | 0                        | 0                            | Hypothetical protein (1)                                      |                                                                                                                                                                                                                                             |                                                                                                                                                                                                      | scaffold_5_mRNA_136.1           | -                           | -                               |
| GF0029646 | 1                            | 0                        | 0                            | Harpin binding protein 1 (1)                                  |                                                                                                                                                                                                                                             | Plastid lipid-associated protein/fibrillin conserved domain [IPR006843] (1)                                                                                                                          | scaffold_5_mRNA_1356.1          | -                           | -                               |
| GF0029645 | 1                            | 0                        | 0                            | Hypothetical protein (1)                                      |                                                                                                                                                                                                                                             |                                                                                                                                                                                                      | scaffold_5_mRNA_1355.1          | -                           | -                               |
| GF0029644 | 1                            | 0                        | 0                            | Hypothetical protein (1)                                      |                                                                                                                                                                                                                                             |                                                                                                                                                                                                      | scaffold_5_mRNA_135.1           | -                           | -                               |
| GF0029643 | 1                            | 0                        | 0                            | Hypothetical protein (1)                                      |                                                                                                                                                                                                                                             |                                                                                                                                                                                                      | scaffold_5_mRNA_1345.1          | -                           | -                               |
| GF0029642 | 1                            | 0                        | 0                            | Hypothetical protein (1)                                      |                                                                                                                                                                                                                                             |                                                                                                                                                                                                      | scaffold_5_mRNA_1340.1          | -                           | -                               |
| GF0029641 | 1                            | 0                        | 0                            | AtRtnA retroelement ORF1 protein, putative (1)                |                                                                                                                                                                                                                                             |                                                                                                                                                                                                      | scaffold_5_mRNA_1339.1          | -                           | -                               |
| GF0029640 | 1                            | 0                        | 0                            | Hypothetical protein (1)                                      |                                                                                                                                                                                                                                             |                                                                                                                                                                                                      | scaffold_5_mRNA_1335.1          | -                           | -                               |
| GF0029639 | 1                            | 0                        | 0                            | Hypothetical protein (1)                                      |                                                                                                                                                                                                                                             |                                                                                                                                                                                                      | scaffold_5_mRNA_1332.1          | -                           | -                               |
| GF0029638 | 1                            | 0                        | 0                            | Cytokinin riboside 5'-monophosphate phosphoribohydrolase (1)  |                                                                                                                                                                                                                                             | LOG family [IPR031100] (1)                                                                                                                                                                           | scaffold_5_mRNA_1330.1          | -                           | -                               |
| GF0029637 | 1                            | 0                        | 0                            | Hypothetical protein (1)                                      |                                                                                                                                                                                                                                             |                                                                                                                                                                                                      | scaffold_5_mRNA_1329.1          | -                           | -                               |
| GF0029636 | 1                            | 0                        | 0                            | Hypothetical protein (1)                                      |                                                                                                                                                                                                                                             |                                                                                                                                                                                                      | scaffold_5_mRNA_1328.1          | -                           | -                               |
| GF0029635 | 1                            | 0                        | 0                            | Hypothetical protein (1)                                      |                                                                                                                                                                                                                                             |                                                                                                                                                                                                      | scaffold_5_mRNA_1313.1          | -                           | -                               |
| GF0029634 | 1                            | 0                        | 0                            | Hypothetical protein (1)                                      |                                                                                                                                                                                                                                             |                                                                                                                                                                                                      | scaffold_5_mRNA_1312.1          | -                           | -                               |
| GF0029633 | 1                            | 0                        | 0                            | Hypothetical protein (1)                                      |                                                                                                                                                                                                                                             |                                                                                                                                                                                                      | scaffold_5_mRNA_1309.1          | -                           | -                               |
| GF0029632 | 1                            | 0                        | 0                            | Hypothetical protein (1)                                      |                                                                                                                                                                                                                                             | Domain of unknown function DUF4219 [IPR025314] (1)                                                                                                                                                   | scaffold_5_mRNA_1308.1          | -                           | -                               |
| GF0029631 | 1                            | 0                        | 0                            | Hypothetical protein (1)                                      |                                                                                                                                                                                                                                             |                                                                                                                                                                                                      | scaffold_5_mRNA_1305.1          | -                           | -                               |
| GF0029630 | 1                            | 0                        | 0                            | Cytokinin riboside 5'-monophosphate phosphoribohydrolase (1)  |                                                                                                                                                                                                                                             | LOG family [IPR031100] (1)                                                                                                                                                                           | scaffold_5_mRNA_1304.1          | -                           | -                               |
| GF0029629 | 1                            | 0                        | 0                            | Hypothetical protein (1)                                      |                                                                                                                                                                                                                                             | Aspartic peptidase domain [IPR021109] (1)                                                                                                                                                            | scaffold_5_mRNA_1300.1          | -                           | -                               |
| GF0029628 | 1                            | 0                        | 0                            | Hypothetical protein (1)                                      |                                                                                                                                                                                                                                             |                                                                                                                                                                                                      | scaffold_5_mRNA_1299.1          | -                           | -                               |
| GF0029627 | 1                            | 0                        | 0                            | Hypothetical protein (1)                                      |                                                                                                                                                                                                                                             |                                                                                                                                                                                                      | scaffold_5_mRNA_1298.1          | -                           | -                               |
| GF0029626 | 1                            | 0                        | 0                            | Hypothetical protein (1)                                      |                                                                                                                                                                                                                                             |                                                                                                                                                                                                      | scaffold_5_mRNA_1296.1          | -                           | -                               |
| GF0029625 | 1                            | 0                        | 0                            | Hypothetical protein (1)                                      | DNA integration [GO:0015074 biological_process] (1); nucleic acid binding [GO:0003676 molecular_function] (1)                                                                                                                               | Ribonuclease H-like domain [IPR012337] (1); LOG family [IPR031100] (1); Integrase, catalytic core [IPR001584] (1)                                                                                    | scaffold_5_mRNA_1292.1          | -                           | -                               |
| GF0029624 | 1                            | 0                        | 0                            | Hypothetical protein (1)                                      |                                                                                                                                                                                                                                             | Reverse transcriptase, RNA-dependent DNA polymerase [IPR031033] (1)                                                                                                                                  | scaffold_5_mRNA_1290.1          | -                           | -                               |
| GF0029623 | 1                            | 0                        | 0                            | Hypothetical protein (1)                                      | nucleic acid binding [GO:0003676 molecular_function] (1); zinc ion binding [GO:0008270 molecular_function] (1)                                                                                                                              | Domain of unknown function DUF4219 [IPR025314] (1); Zinc finger, CCHC-type [IPR001878] (1)                                                                                                           | scaffold_5_mRNA_1288.1          | -                           | -                               |
| GF0029622 | 1                            | 0                        | 0                            | Hypothetical protein (1)                                      |                                                                                                                                                                                                                                             |                                                                                                                                                                                                      | scaffold_5_mRNA_1286.1          | -                           | -                               |
| GF0029621 | 1                            | 0                        | 0                            | Hypothetical protein (1)                                      |                                                                                                                                                                                                                                             |                                                                                                                                                                                                      | scaffold_5_mRNA_1285.1          | -                           | -                               |
| GF0029620 | 1                            | 0                        | 0                            | Cytokinin riboside 5'-monophosphate phosphoribohydrolase (1)  |                                                                                                                                                                                                                                             | Cytokinin riboside 5'-monophosphate phosphoribohydrolase LOG [IPR005269] (1); LOG family [IPR031100] (1)                                                                                             | scaffold_5_mRNA_1284.1          | -                           | -                               |
| GF0029619 | 1                            | 0                        | 0                            | Ubiquitin carboxyl-terminal hydrolase 12 (1)                  | protein binding [GO:0005515 molecular_function] (1)                                                                                                                                                                                         | MATH/TRAF domain [IPR020883] (1); TRAF-like [IPR008974] (1)                                                                                                                                          | scaffold_5_mRNA_1283.1          | -                           | -                               |
| GF0029618 | 1                            | 0                        | 0                            | TRAF-like family protein isoform 2 (1)                        | protein binding [GO:0005515 molecular_function] (1); zinc ion binding [GO:0008270 molecular_function] (1)                                                                                                                                   | MATH/TRAF domain [IPR020883] (1); TRAF-like [IPR008974] (1); Zinc finger, SWIM-type [IPR07527] (1); Zinc finger, PMZ-type [IPR006564] (1)                                                            | scaffold_5_mRNA_1281.1          | -                           | -                               |
| GF0029617 | 1                            | 0                        | 0                            | Polypeptide with reverse transcriptase and RNaseH domains (1) |                                                                                                                                                                                                                                             | Reverse transcriptase, RNA-dependent DNA polymerase [IPR031033] (1)                                                                                                                                  | scaffold_5_mRNA_1272.1          | -                           | -                               |
| GF0029616 | 1                            | 0                        | 0                            | Hypothetical protein (1)                                      | mitotic spindle assembly checkpoint [GO:0007094 biological_process] (1)                                                                                                                                                                     | Spindle assembly checkpoint component Mad1 [IPR008672] (1)                                                                                                                                           | scaffold_5_mRNA_126.1           | -                           | -                               |
| GF0029615 | 1                            | 0                        | 0                            | Hypothetical protein (1)                                      |                                                                                                                                                                                                                                             |                                                                                                                                                                                                      | scaffold_5_mRNA_1258.1          | -                           | -                               |
| GF0029614 | 1                            | 0                        | 0                            | Hypothetical protein (1)                                      |                                                                                                                                                                                                                                             |                                                                                                                                                                                                      | scaffold_5_mRNA_1257.1          | -                           | -                               |
| GF0029613 | 1                            | 0                        | 0                            | Hypothetical protein (1)                                      |                                                                                                                                                                                                                                             |                                                                                                                                                                                                      | scaffold_5_mRNA_1255.1          | -                           | -                               |
| GF0029612 | 1                            | 0                        | 0                            | Hypothetical protein (1)                                      |                                                                                                                                                                                                                                             |                                                                                                                                                                                                      | scaffold_5_mRNA_1250.1          | -                           | -                               |
| GF0029611 | 1                            | 0                        | 0                            | Hypothetical protein (1)                                      |                                                                                                                                                                                                                                             |                                                                                                                                                                                                      | scaffold_5_mRNA_125.1           | -                           | -                               |
| GF0029610 | 1                            | 0                        | 0                            | Hypothetical protein (1)                                      |                                                                                                                                                                                                                                             |                                                                                                                                                                                                      | scaffold_5_mRNA_124.1           | -                           | -                               |
| GF0029609 | 1                            | 0                        | 0                            | Truncated RB (1)                                              | ADP binding [GO:0043531 molecular_function] (1)                                                                                                                                                                                             | NB-ARC [IPR002182] (1); Protein RETICULATAA-related [IPR021825] (1); P-loop containing nucleoside triphosphate hydrolase [IPR027417] (1)                                                             | scaffold_5_mRNA_1237.1          | -                           | -                               |
| GF0029608 | 1                            | 0                        | 0                            | Truncated RB (1)                                              | ADP binding [GO:0043531 molecular_function] (1)                                                                                                                                                                                             | P-loop containing nucleoside triphosphate hydrolase [IPR027417] (1); NB-ARC [IPR002182] (1)                                                                                                          | scaffold_5_mRNA_1236.1          | -                           | -                               |
| GF0029607 | 1                            | 0                        | 0                            | Hypothetical protein (1)                                      |                                                                                                                                                                                                                                             |                                                                                                                                                                                                      | scaffold_5_mRNA_1235.1          | -                           | -                               |
| GF0029606 | 1                            | 0                        | 0                            | Hypothetical protein (1)                                      |                                                                                                                                                                                                                                             | Leucine-rich repeat domain, L domain-like [IPR032675] (1)                                                                                                                                            | scaffold_5_mRNA_1233.1          | -                           | -                               |
| GF0029605 | 1                            | 0                        | 0                            | Hypothetical protein (1)                                      |                                                                                                                                                                                                                                             | Leucine-rich repeat domain, L domain-like [IPR032675] (1)                                                                                                                                            | scaffold_5_mRNA_1232.1          | -                           | -                               |
| GF0029604 | 1                            | 0                        | 0                            | Hypothetical protein (1)                                      |                                                                                                                                                                                                                                             | Retrosposon gag domain [IPR005162] (1)                                                                                                                                                               | scaffold_5_mRNA_1228.1          | -                           | -                               |
| GF0029603 | 1                            | 0                        | 0                            | Putative disease resistance protein (1)                       |                                                                                                                                                                                                                                             | Leucine-rich repeat domain, L domain-like [IPR032675] (1)                                                                                                                                            | scaffold_5_mRNA_1225.1          | -                           | -                               |
| GF0029602 | 1                            | 0                        | 0                            | Retrosposon gag protein (1)                                   |                                                                                                                                                                                                                                             |                                                                                                                                                                                                      | scaffold_5_mRNA_1221.1          | -                           | -                               |
| GF0029601 | 1                            | 0                        | 0                            | Hypothetical protein (1)                                      |                                                                                                                                                                                                                                             |                                                                                                                                                                                                      | scaffold_5_mRNA_1213.1          | -                           | -                               |

| ID        | Num. in <i>C. clementinae</i> | Num. in <i>C. uchihae</i> | Num. in <i>P. trifoliata</i> | Note                                                           | GO                                                                                                                                                                                                                                                                                                                    | InterPro                                                                                                                                                                                                                                                       | Members in <i>C. clementinae</i> | Members in <i>C. uchihae</i> | Members in <i>P. trifoliata</i> |
|-----------|-------------------------------|---------------------------|------------------------------|----------------------------------------------------------------|-----------------------------------------------------------------------------------------------------------------------------------------------------------------------------------------------------------------------------------------------------------------------------------------------------------------------|----------------------------------------------------------------------------------------------------------------------------------------------------------------------------------------------------------------------------------------------------------------|----------------------------------|------------------------------|---------------------------------|
| GF0029600 | 1                             | 0                         | 0                            | 0 Hypothetical protein (1)                                     |                                                                                                                                                                                                                                                                                                                       | Leucine-rich repeat domain, L domain-like [IPRO02675] (1); Winged helix-turn-helix DNA-binding domain [IPRO11991] (1)                                                                                                                                          | scaffold_5_mRNA_1211.1           | -                            | -                               |
| GF0029599 | 1                             | 0                         | 0                            | 0 Hypothetical protein (1)                                     |                                                                                                                                                                                                                                                                                                                       | LOG family [IPRO31100] (1)                                                                                                                                                                                                                                     | scaffold_5_mRNA_1204.1           | -                            | -                               |
| GF0029598 | 1                             | 0                         | 0                            | 0 Hypothetical protein (1)                                     |                                                                                                                                                                                                                                                                                                                       |                                                                                                                                                                                                                                                                | scaffold_5_mRNA_1203.1           | -                            | -                               |
| GF0029597 | 1                             | 0                         | 0                            | 0 Hypothetical protein (1)                                     |                                                                                                                                                                                                                                                                                                                       |                                                                                                                                                                                                                                                                | scaffold_5_mRNA_1202.1           | -                            | -                               |
| GF0029596 | 1                             | 0                         | 0                            | 0 Hypothetical protein (1)                                     |                                                                                                                                                                                                                                                                                                                       | Aspartic peptidase domain [IPRO21109] (1); Retrotransposon gag domain [IPRO05162] (1)                                                                                                                                                                          | scaffold_5_mRNA_1201.1           | -                            | -                               |
| GF0029595 | 1                             | 0                         | 0                            | 0 Hypothetical protein (1)                                     | ADP binding [GO:0043531] molecular_function (1)                                                                                                                                                                                                                                                                       | P-loop containing nucleoside triphosphate hydrolase [IPRO27417] (1); NB-ARC [IPRO2162] (1); Winged helix-turn-helix DNA-binding domain [IPRO11991] (1); Leucine-rich repeat domain, L domain-like [IPRO32675] (1)                                              | scaffold_5_mRNA_1200.1           | -                            | -                               |
| GF0029594 | 1                             | 0                         | 0                            | 0 Hypothetical protein (1)                                     |                                                                                                                                                                                                                                                                                                                       |                                                                                                                                                                                                                                                                | scaffold_5_mRNA_1199.1           | -                            | -                               |
| GF0029593 | 1                             | 0                         | 0                            | 0 Putative disease resistance protein (1)                      |                                                                                                                                                                                                                                                                                                                       | Leucine-rich repeat domain, L domain-like [IPRO32675] (1)                                                                                                                                                                                                      | scaffold_5_mRNA_1198.1           | -                            | -                               |
| GF0029592 | 1                             | 0                         | 0                            | 0 Hypothetical protein (1)                                     | catalytic activity [GO:0003824] molecular_function (1); ATP binding [GO:0005524] molecular_function (1)                                                                                                                                                                                                               | ATP-grasp fold, subdomain 1 [IPRO13815] (1)                                                                                                                                                                                                                    | scaffold_5_mRNA_1196.1           | -                            | -                               |
| GF0029591 | 1                             | 0                         | 0                            | 0 Hypothetical protein (1)                                     |                                                                                                                                                                                                                                                                                                                       |                                                                                                                                                                                                                                                                | scaffold_5_mRNA_1195.1           | -                            | -                               |
| GF0029590 | 1                             | 0                         | 0                            | 0 Hypothetical protein (1)                                     | nucleic acid binding [GO:0003676] molecular_function (1); zinc ion binding [GO:0008270] molecular_function (1)                                                                                                                                                                                                        | Zinc finger, CCHC-type [IPRO01878] (1)                                                                                                                                                                                                                         | scaffold_5_mRNA_1194.1           | -                            | -                               |
| GF0029589 | 1                             | 0                         | 0                            | 0 Putative disease resistance protein (1)                      |                                                                                                                                                                                                                                                                                                                       | Leucine-rich repeat domain, L domain-like [IPRO32675] (1)                                                                                                                                                                                                      | scaffold_5_mRNA_1193.1           | -                            | -                               |
| GF0029588 | 1                             | 0                         | 0                            | 0 Hypothetical protein (1)                                     |                                                                                                                                                                                                                                                                                                                       |                                                                                                                                                                                                                                                                | scaffold_5_mRNA_1191.1           | -                            | -                               |
| GF0029587 | 1                             | 0                         | 0                            | 0 Zinc finger-homeodomain protein 2 (1)                        |                                                                                                                                                                                                                                                                                                                       | ZF-HD homeobox protein, Cys/His-rich dimerization domain [IPRO06456] (1)                                                                                                                                                                                       | scaffold_5_mRNA_119.1            | -                            | -                               |
| GF0029586 | 1                             | 0                         | 0                            | 0 Hypothetical protein (1)                                     |                                                                                                                                                                                                                                                                                                                       | Leucine-rich repeat domain, L domain-like [IPRO32675] (1)                                                                                                                                                                                                      | scaffold_5_mRNA_1188.1           | -                            | -                               |
| GF0029585 | 1                             | 0                         | 0                            | 0 Putative disease resistance protein RGA1 (1)                 |                                                                                                                                                                                                                                                                                                                       | Winged helix-turn-helix DNA-binding domain [IPRO11991] (1)                                                                                                                                                                                                     | scaffold_5_mRNA_1186.1           | -                            | -                               |
| GF0029584 | 1                             | 0                         | 0                            | 0 Hypothetical protein (1)                                     |                                                                                                                                                                                                                                                                                                                       |                                                                                                                                                                                                                                                                | scaffold_5_mRNA_1183.1           | -                            | -                               |
| GF0029583 | 1                             | 0                         | 0                            | 0 Hypothetical protein (1)                                     |                                                                                                                                                                                                                                                                                                                       | Leucine-rich repeat domain, L domain-like [IPRO32675] (1)                                                                                                                                                                                                      | scaffold_5_mRNA_1179.1           | -                            | -                               |
| GF0029582 | 1                             | 0                         | 0                            | 0 NB-ARC domain disease resistance protein (1)                 | ADP binding [GO:0043531] molecular_function (1)                                                                                                                                                                                                                                                                       | NB-ARC [IPRO02182] (1); P-loop containing nucleoside triphosphate hydrolase [IPRO27417] (1)                                                                                                                                                                    | scaffold_5_mRNA_1177.1           | -                            | -                               |
| GF0029581 | 1                             | 0                         | 0                            | 0 Putative disease resistance protein (1)                      |                                                                                                                                                                                                                                                                                                                       | Leucine-rich repeat domain, L domain-like [IPRO32675] (1)                                                                                                                                                                                                      | scaffold_5_mRNA_1175.1           | -                            | -                               |
| GF0029580 | 1                             | 0                         | 0                            | 0 Putative disease resistance protein RGA1 (1)                 |                                                                                                                                                                                                                                                                                                                       |                                                                                                                                                                                                                                                                | scaffold_5_mRNA_1172.1           | -                            | -                               |
| GF0029579 | 1                             | 0                         | 0                            | 0 Peroxidase 15 (1)                                            | hydrogen peroxide catabolic process [GO:0042744] biological_process (1); response to oxidative stress [GO:0006979] biological_process (1); heme binding [GO:0020057] molecular_function (1); peroxidase activity [GO:0004601] molecular_function (1); oxidation-reduction process [GO:0055114] biological_process (1) | Haem peroxidase [IPRO10255] (1); Secretory peroxidase [IPRO03905] (1); Haem peroxidase, plant/fungal/bacterial [IPRO2016] (1); Plant peroxidase [IPRO00823] (1); Peroxidases heme-ligand binding site [IPRO19793] (1); Peroxidase, active site [IPRO19794] (1) | scaffold_5_mRNA_1171.1           | -                            | -                               |
| GF0029578 | 1                             | 0                         | 0                            | 0 Hypothetical protein (1)                                     |                                                                                                                                                                                                                                                                                                                       |                                                                                                                                                                                                                                                                | scaffold_5_mRNA_1166.1           | -                            | -                               |
| GF0029577 | 1                             | 0                         | 0                            | 0 Hypothetical protein (1)                                     |                                                                                                                                                                                                                                                                                                                       |                                                                                                                                                                                                                                                                | scaffold_5_mRNA_1157.1           | -                            | -                               |
| GF0029576 | 1                             | 0                         | 0                            | 0 Monosaccharide transport protein (1)                         | binding [GO:0005488] molecular_function (1)                                                                                                                                                                                                                                                                           | Armillo-type fold [IPRO16024] (1)                                                                                                                                                                                                                              | scaffold_5_mRNA_1152.1           | -                            | -                               |
| GF0029575 | 1                             | 0                         | 0                            | 0 Hypothetical protein (1)                                     |                                                                                                                                                                                                                                                                                                                       |                                                                                                                                                                                                                                                                | scaffold_5_mRNA_1149.1           | -                            | -                               |
| GF0029574 | 1                             | 0                         | 0                            | 0 Hypothetical protein (1)                                     |                                                                                                                                                                                                                                                                                                                       | Retrotransposon gag domain [IPRO05162] (1)                                                                                                                                                                                                                     | scaffold_5_mRNA_1148.1           | -                            | -                               |
| GF0029573 | 1                             | 0                         | 0                            | 0 Hypothetical protein (1)                                     |                                                                                                                                                                                                                                                                                                                       | Leucine-rich repeat domain, L domain-like [IPRO32675] (1)                                                                                                                                                                                                      | scaffold_5_mRNA_1146.1           | -                            | -                               |
| GF0029572 | 1                             | 0                         | 0                            | 0 Hypothetical protein (1)                                     | cysteine-type peptidase activity [GO:0008234] molecular_function (1); proteolysis [GO:0006508] biological_process (1)                                                                                                                                                                                                 | Upl1 protease family, C-terminal catalytic domain [IPRO03653] (1)                                                                                                                                                                                              | scaffold_5_mRNA_1145.1           | -                            | -                               |
| GF0029571 | 1                             | 0                         | 0                            | 0 Hypothetical protein (1)                                     |                                                                                                                                                                                                                                                                                                                       |                                                                                                                                                                                                                                                                | scaffold_5_mRNA_1143.1           | -                            | -                               |
| GF0029570 | 1                             | 0                         | 0                            | 0 Cytokinin riboside 5'-monophosphate phosphoribohydrolase (1) |                                                                                                                                                                                                                                                                                                                       | LOG family [IPRO31100] (1)                                                                                                                                                                                                                                     | scaffold_5_mRNA_1142.1           | -                            | -                               |
| GF0029569 | 1                             | 0                         | 0                            | 0 Hypothetical protein (1)                                     |                                                                                                                                                                                                                                                                                                                       | Domain of unknown function DUF4216 [IPRO2532] (1); Transposon, IS-like [IPRO04242] (1); Domain of unknown function DUF4218 [IPRO23452] (1); Transposase-associated domain [IPRO2480] (1)                                                                       | scaffold_5_mRNA_1141.1           | -                            | -                               |
| GF0029568 | 1                             | 0                         | 0                            | 0 Hypothetical protein (1)                                     | nucleic acid binding [GO:0003676] molecular_function (1)                                                                                                                                                                                                                                                              | Ribonuclease H-like domain [IPRO12337] (1)                                                                                                                                                                                                                     | scaffold_5_mRNA_1139.1           | -                            | -                               |
| GF0029567 | 1                             | 0                         | 0                            | 0 Hypothetical protein (1)                                     | nucleic acid binding [GO:0003676] molecular_function (1)                                                                                                                                                                                                                                                              | Ribonuclease H-like domain [IPRO12337] (1)                                                                                                                                                                                                                     | scaffold_5_mRNA_1138.1           | -                            | -                               |
| GF0029566 | 1                             | 0                         | 0                            | 0 Hypothetical protein (1)                                     |                                                                                                                                                                                                                                                                                                                       | Leucine-rich repeat domain, L domain-like [IPRO32675] (1)                                                                                                                                                                                                      | scaffold_5_mRNA_1135.1           | -                            | -                               |
| GF0029565 | 1                             | 0                         | 0                            | 0 Hypothetical protein (1)                                     |                                                                                                                                                                                                                                                                                                                       |                                                                                                                                                                                                                                                                | scaffold_5_mRNA_1132.1           | -                            | -                               |
| GF0029564 | 1                             | 0                         | 0                            | 0 Hypothetical protein (1)                                     |                                                                                                                                                                                                                                                                                                                       |                                                                                                                                                                                                                                                                | scaffold_5_mRNA_1131.1           | -                            | -                               |
| GF0029563 | 1                             | 0                         | 0                            | 0 Hypothetical protein (1)                                     |                                                                                                                                                                                                                                                                                                                       | Viral movement protein [IPRO28919] (1)                                                                                                                                                                                                                         | scaffold_5_mRNA_1128.1           | -                            | -                               |
| GF0029562 | 1                             | 0                         | 0                            | 0 Hypothetical protein (1)                                     |                                                                                                                                                                                                                                                                                                                       | Domain of unknown function DUF4371 [IPRO25398] (1); Protein RETICULATA-related [IPRO21825] (1)                                                                                                                                                                 | scaffold_5_mRNA_1127.1           | -                            | -                               |
| GF0029561 | 1                             | 0                         | 0                            | 0 Hypothetical protein (1)                                     |                                                                                                                                                                                                                                                                                                                       |                                                                                                                                                                                                                                                                | scaffold_5_mRNA_1126.1           | -                            | -                               |
| GF0029560 | 1                             | 0                         | 0                            | 0 Hypothetical protein (1)                                     |                                                                                                                                                                                                                                                                                                                       |                                                                                                                                                                                                                                                                | scaffold_5_mRNA_1125.1           | -                            | -                               |
| GF0029559 | 1                             | 0                         | 0                            | 0 Putative disease resistance protein (1)                      |                                                                                                                                                                                                                                                                                                                       | Leucine-rich repeat domain, L domain-like [IPRO32675] (1); Winged helix-turn-helix DNA-binding domain [IPRO11991] (1)                                                                                                                                          | scaffold_5_mRNA_1123.1           | -                            | -                               |
| GF0029558 | 1                             | 0                         | 0                            | 0 Hypothetical protein (1)                                     |                                                                                                                                                                                                                                                                                                                       |                                                                                                                                                                                                                                                                | scaffold_5_mRNA_1121.1           | -                            | -                               |
| GF0029557 | 1                             | 0                         | 0                            | 0 Hypothetical protein (1)                                     |                                                                                                                                                                                                                                                                                                                       | Leucine-rich repeat domain, L domain-like [IPRO32675] (1)                                                                                                                                                                                                      | scaffold_5_mRNA_112.1            | -                            | -                               |
| GF0029556 | 1                             | 0                         | 0                            | 0 Hypothetical protein (1)                                     |                                                                                                                                                                                                                                                                                                                       |                                                                                                                                                                                                                                                                | scaffold_5_mRNA_1119.1           | -                            | -                               |
| GF0029555 | 1                             | 0                         | 0                            | 0 Hypothetical protein (1)                                     |                                                                                                                                                                                                                                                                                                                       |                                                                                                                                                                                                                                                                | scaffold_5_mRNA_1118.1           | -                            | -                               |
| GF0029554 | 1                             | 0                         | 0                            | 0 Hypothetical protein (1)                                     |                                                                                                                                                                                                                                                                                                                       |                                                                                                                                                                                                                                                                | scaffold_5_mRNA_1117.1           | -                            | -                               |
| GF0029553 | 1                             | 0                         | 0                            | 0 Hypothetical protein (1)                                     | cysteine-type peptidase activity [GO:0008234] molecular_function (1); proteolysis [GO:0006508] biological_process (1)                                                                                                                                                                                                 | Upl1 protease family, C-terminal catalytic domain [IPRO03653] (1); Small heat-shock protein HSP20 [IPRO03107] (1); Domain of unknown function DUF1985 [IPRO15410] (1); HSP20-like chaperone [IPRO08978] (1); Alpha crystallin/hsp20 domain [IPRO2068] (1)      | scaffold_5_mRNA_1111.1           | -                            | -                               |
| GF0029552 | 1                             | 0                         | 0                            | 0 Hypothetical protein (1)                                     |                                                                                                                                                                                                                                                                                                                       | Retrotransposon gag domain [IPRO05162] (1)                                                                                                                                                                                                                     | scaffold_5_mRNA_1096.1           | -                            | -                               |
| GF0029551 | 1                             | 0                         | 0                            | 0 Hypothetical protein (1)                                     | nucleic acid binding [GO:0003676] molecular_function (1)                                                                                                                                                                                                                                                              | Reverse transcriptase zinc-binding domain [IPRO05960] (1); Ribonuclease H-like domain [IPRO12337] (1); Leucine-rich repeat domain, L domain-like [IPRO32675] (1)                                                                                               | scaffold_5_mRNA_108.1            | -                            | -                               |
| GF0029550 | 1                             | 0                         | 0                            | 0 Cytokinin riboside 5'-monophosphate phosphoribohydrolase (1) |                                                                                                                                                                                                                                                                                                                       | LOG family [IPRO31100] (1); Cytokinin riboside 5'-monophosphate phosphoribohydrolase LOG [IPRO05269] (1)                                                                                                                                                       | scaffold_5_mRNA_1067.1           | -                            | -                               |
| GF0029549 | 1                             | 0                         | 0                            | 0 Hypothetical protein (1)                                     |                                                                                                                                                                                                                                                                                                                       |                                                                                                                                                                                                                                                                | scaffold_5_mRNA_1066.1           | -                            | -                               |
| GF0029548 | 1                             | 0                         | 0                            | 0 Hypothetical protein (1)                                     | proteolysis [GO:0006508] biological_process (1); cysteine-type peptidase activity [GO:0008234] molecular_function (1)                                                                                                                                                                                                 | Upl1 protease family, C-terminal catalytic domain [IPRO03653] (1)                                                                                                                                                                                              | scaffold_5_mRNA_1065.1           | -                            | -                               |
| GF0029547 | 1                             | 0                         | 0                            | 0 Hypothetical protein (1)                                     | zinc ion binding [GO:0008270] molecular_function (1); regulation of transcription, DNA-templated [GO:0006355] biological_process (1); nucleic acid binding [GO:0003676] molecular_function (1)                                                                                                                        | Zinc finger, PMZ-type [IPRO06564] (1); Zinc finger, SWIM-type [IPRO07527] (1); FIV-FAR1 family [IPRO1052] (1); Zinc finger, CCHC-type [IPRO01878] (1)                                                                                                          | scaffold_5_mRNA_1064.1           | -                            | -                               |
| GF0029546 | 1                             | 0                         | 0                            | 0 Disease resistance protein RPS2 (1)                          |                                                                                                                                                                                                                                                                                                                       |                                                                                                                                                                                                                                                                | scaffold_5_mRNA_106.1            | -                            | -                               |
| GF0029545 | 1                             | 0                         | 0                            | 0 Hypothetical protein (1)                                     |                                                                                                                                                                                                                                                                                                                       |                                                                                                                                                                                                                                                                | scaffold_5_mRNA_1056.1           | -                            | -                               |
| GF0029544 | 1                             | 0                         | 0                            | 0 Hypothetical protein (1)                                     |                                                                                                                                                                                                                                                                                                                       | Reverse transcriptase domain [IPRO00477] (1)                                                                                                                                                                                                                   | scaffold_5_mRNA_1051.1           | -                            | -                               |
| GF0029543 | 1                             | 0                         | 0                            | 0 Hypothetical protein (1)                                     | methyltransferase activity [GO:0008168] molecular_function (1)                                                                                                                                                                                                                                                        | SAM dependent carboxyl methyltransferase [IPRO05299] (1); S-adenosyl-L-methionine-dependent methyltransferase [IPRO29063] (1)                                                                                                                                  | scaffold_5_mRNA_1034.1           | -                            | -                               |
| GF0029542 | 1                             | 0                         | 0                            | 0 Hypothetical protein (1)                                     |                                                                                                                                                                                                                                                                                                                       | Reverse transcriptase domain [IPRO00477] (1)                                                                                                                                                                                                                   | scaffold_5_mRNA_1021.1           | -                            | -                               |
| GF0029541 | 1                             | 0                         | 0                            | 0 Hypothetical protein (1)                                     |                                                                                                                                                                                                                                                                                                                       |                                                                                                                                                                                                                                                                | scaffold_5_mRNA_1013.1           | -                            | -                               |
| GF0029540 | 1                             | 0                         | 0                            | 0 Hypothetical protein (1)                                     | RNA-DNA hybrid ribonuclease activity [GO:0004523] molecular_function (1); nucleic acid binding [GO:0003676] molecular_function (1)                                                                                                                                                                                    | Ribonuclease H domain [IPRO02156] (1); Ribonuclease H-like domain [IPRO12337] (1); TR2/DPI/HV-A22-related protein [IPRO04345] (1)                                                                                                                              | scaffold_5_mRNA_1008.1           | -                            | -                               |
| GF0029539 | 1                             | 0                         | 0                            | 0 Hypothetical protein (1)                                     |                                                                                                                                                                                                                                                                                                                       | DNA-binding pseudobarrel domain [IPRO15300] (1)                                                                                                                                                                                                                | scaffold_5_mRNA_1007.1           | -                            | -                               |

| ID        | Num. in <i>C. clementiae</i> | Num. in <i>C. uchiha</i> | Num. in <i>P. trifoliata</i> | Note                                                                       | GO                                                                                                                                                                                                                             | InterPro                                                                                                                                                                                                                                                                                                                                                                                                                                                                                            | Members in <i>C. clementiae</i> | Members in <i>C. uchiha</i> | Members in <i>P. trifoliata</i> |
|-----------|------------------------------|--------------------------|------------------------------|----------------------------------------------------------------------------|--------------------------------------------------------------------------------------------------------------------------------------------------------------------------------------------------------------------------------|-----------------------------------------------------------------------------------------------------------------------------------------------------------------------------------------------------------------------------------------------------------------------------------------------------------------------------------------------------------------------------------------------------------------------------------------------------------------------------------------------------|---------------------------------|-----------------------------|---------------------------------|
| GF0029538 | 1                            | 0                        | 0                            | 0 Hypothetical protein (1)                                                 |                                                                                                                                                                                                                                |                                                                                                                                                                                                                                                                                                                                                                                                                                                                                                     | scaffold_5_mRNA_1005.1          | -                           | -                               |
| GF0029537 | 1                            | 0                        | 0                            | 0 Hypothetical protein (1)                                                 |                                                                                                                                                                                                                                |                                                                                                                                                                                                                                                                                                                                                                                                                                                                                                     | scaffold_5_mRNA_1003.1          | -                           | -                               |
| GF0029536 | 1                            | 0                        | 0                            | 0 Hypothetical protein (1)                                                 |                                                                                                                                                                                                                                |                                                                                                                                                                                                                                                                                                                                                                                                                                                                                                     | scaffold_4_mRNA_993.1           | -                           | -                               |
| GF0029535 | 1                            | 0                        | 0                            | 0 Hypothetical protein (1)                                                 |                                                                                                                                                                                                                                |                                                                                                                                                                                                                                                                                                                                                                                                                                                                                                     | scaffold_4_mRNA_992.1           | -                           | -                               |
| GF0029534 | 1                            | 0                        | 0                            | 0 Cytokinin riboside 5'-monophosphate phosphoribohydrolase (1)             |                                                                                                                                                                                                                                | LOG family [IPR031100] (1)                                                                                                                                                                                                                                                                                                                                                                                                                                                                          | scaffold_4_mRNA_991.1           | -                           | -                               |
| GF0029533 | 1                            | 0                        | 0                            | 0 Cytokinin riboside 5'-monophosphate phosphoribohydrolase (1)             |                                                                                                                                                                                                                                | LOG family [IPR031100] (1)                                                                                                                                                                                                                                                                                                                                                                                                                                                                          | scaffold_4_mRNA_989.1           | -                           | -                               |
| GF0029532 | 1                            | 0                        | 0                            | 0 Hypothetical protein (1)                                                 |                                                                                                                                                                                                                                |                                                                                                                                                                                                                                                                                                                                                                                                                                                                                                     | scaffold_4_mRNA_987.1           | -                           | -                               |
| GF0029531 | 1                            | 0                        | 0                            | 0 Cytokinin riboside 5'-monophosphate phosphoribohydrolase (1)             |                                                                                                                                                                                                                                | LOG family [IPR031100] (1)                                                                                                                                                                                                                                                                                                                                                                                                                                                                          | scaffold_4_mRNA_986.1           | -                           | -                               |
| GF0029530 | 1                            | 0                        | 0                            | 0 LRR receptor-like kinase family protein (1)                              | protein kinase activity [GO:0004672 molecular_function] (1); protein phosphorylation [GO:0006468 biological_process] (1); ATP binding [GO:0005524 molecular_function] (1); protein binding [GO:0005515 molecular_function] (1) | Protein kinase domain [IPR000719] (1); Protein kinase-like domain [IPR011009] (1); Leucine-rich repeat domain, L domain-like [IPR032675] (1); Leucine-rich repeat, typical subtype [IPR003591] (1); Tyrosine-protein kinase, active site [IPR00266] (1); Protein kinase, ATP binding site [IPR017441] (1); Leucine-rich repeat [IPR001611] (1); Leucine-rich repeat [IPR001611] (1); Leucine-rich repeat, typical subtype [IPR03591] (1); Leucine-rich repeat domain, L domain-like [IPR032675] (1) | scaffold_4_mRNA_985.1           | -                           | -                               |
| GF0029529 | 1                            | 0                        | 0                            | 0 Hypothetical protein (1)                                                 | protein binding [GO:0005515 molecular_function] (1)                                                                                                                                                                            |                                                                                                                                                                                                                                                                                                                                                                                                                                                                                                     | scaffold_4_mRNA_982.1           | -                           | -                               |
| GF0029528 | 1                            | 0                        | 0                            | 0 Hypothetical protein (1)                                                 |                                                                                                                                                                                                                                |                                                                                                                                                                                                                                                                                                                                                                                                                                                                                                     | scaffold_4_mRNA_97.1            | -                           | -                               |
| GF0029527 | 1                            | 0                        | 0                            | 0 Hypothetical protein (1)                                                 |                                                                                                                                                                                                                                | Leucine-rich repeat [IPR001611] (1); Protein kinase, ATP binding site [IPR017441] (1); Tyrosine-protein kinase, active site [IPR00266] (1); Protein kinase-like domain [IPR011009] (1); Leucine-rich repeat domain, L domain-like [IPR032675] (1); Leucine-rich repeat, typical subtype [IPR003591] (1); Protein kinase domain [IPR000719] (1)                                                                                                                                                      | scaffold_4_mRNA_966.1           | -                           | -                               |
| GF0029526 | 1                            | 0                        | 0                            | 0 LRR receptor-like kinase family protein (1)                              | protein kinase activity [GO:0004672 molecular_function] (1); protein phosphorylation [GO:0006468 biological_process] (1); ATP binding [GO:0005524 molecular_function] (1); protein binding [GO:0005515 molecular_function] (1) | Leucine-rich repeat [IPR001611] (1); Protein kinase, ATP binding site [IPR017441] (1); Tyrosine-protein kinase, active site [IPR00266] (1); Protein kinase-like domain [IPR011009] (1); Leucine-rich repeat domain, L domain-like [IPR032675] (1); Leucine-rich repeat, typical subtype [IPR003591] (1); Protein kinase domain [IPR000719] (1)                                                                                                                                                      | scaffold_4_mRNA_962.1           | -                           | -                               |
| GF0029525 | 1                            | 0                        | 0                            | 0 Hypothetical protein (1)                                                 |                                                                                                                                                                                                                                |                                                                                                                                                                                                                                                                                                                                                                                                                                                                                                     | scaffold_4_mRNA_925.1           | -                           | -                               |
| GF0029524 | 1                            | 0                        | 0                            | 0 Hypothetical protein (1)                                                 |                                                                                                                                                                                                                                |                                                                                                                                                                                                                                                                                                                                                                                                                                                                                                     | scaffold_4_mRNA_924.1           | -                           | -                               |
| GF0029523 | 1                            | 0                        | 0                            | 0 Putative non-LTR retroelement reverse transcriptase (1)                  | nucleic acid binding [GO:0003676 molecular_function] (1)                                                                                                                                                                       | Reverse transcriptase domain [IPR000477] (1); Ribonuclease H-like domain [IPR012337] (1)                                                                                                                                                                                                                                                                                                                                                                                                            | scaffold_4_mRNA_923.1           | -                           | -                               |
| GF0029522 | 1                            | 0                        | 0                            | 0 Hypothetical protein (1)                                                 | nucleic acid binding [GO:0003676 molecular_function] (1); zinc ion binding [GO:0008270 molecular_function] (1)                                                                                                                 | Domain of unknown function DUF4219 [IPR025314] (1); Zinc finger, CCHC-type [IPR001878] (1)                                                                                                                                                                                                                                                                                                                                                                                                          | scaffold_4_mRNA_918.1           | -                           | -                               |
| GF0029521 | 1                            | 0                        | 0                            | 0 Hypothetical protein (1)                                                 | DNA binding [GO:0003677 molecular_function] (1); nucleic acid binding [GO:0003676 molecular_function] (1); protein dimerization activity [GO:0046983 molecular_function] (1)                                                   | Ribonuclease H-like domain [IPR012337] (1); Zinc finger, BED-type [IPR003656] (1); HAT, C-terminal dimerization domain [IPR008906] (1)                                                                                                                                                                                                                                                                                                                                                              | scaffold_4_mRNA_905.1           | -                           | -                               |
| GF0029520 | 1                            | 0                        | 0                            | 0 Hypothetical protein (1)                                                 |                                                                                                                                                                                                                                |                                                                                                                                                                                                                                                                                                                                                                                                                                                                                                     | scaffold_4_mRNA_903.1           | -                           | -                               |
| GF0029519 | 1                            | 0                        | 0                            | 0 Hypothetical protein (1)                                                 |                                                                                                                                                                                                                                |                                                                                                                                                                                                                                                                                                                                                                                                                                                                                                     | scaffold_4_mRNA_9.1             | -                           | -                               |
| GF0029518 | 1                            | 0                        | 0                            | 0 Integrase (1)                                                            |                                                                                                                                                                                                                                | Aspartic peptidase domain [IPR021109] (1); LOG family [IPR031100] (1)                                                                                                                                                                                                                                                                                                                                                                                                                               | scaffold_4_mRNA_884.1           | -                           | -                               |
| GF0029517 | 1                            | 0                        | 0                            | 0 Hypothetical protein (1)                                                 | cysteine-type peptidase activity [GO:0000234 molecular_function] (1); proteolysis [GO:0006508 biological_process] (1)                                                                                                          | Ulp1 protease family, C-terminal catalytic domain [IPR003653] (1)                                                                                                                                                                                                                                                                                                                                                                                                                                   | scaffold_4_mRNA_877.1           | -                           | -                               |
| GF0029516 | 1                            | 0                        | 0                            | 0 Hypothetical protein (1)                                                 |                                                                                                                                                                                                                                | Leucine-rich repeat domain, L domain-like [IPR032675] (1)                                                                                                                                                                                                                                                                                                                                                                                                                                           | scaffold_4_mRNA_868.1           | -                           | -                               |
| GF0029515 | 1                            | 0                        | 0                            | 0 Tryptophan reductase (1)                                                 |                                                                                                                                                                                                                                | NAD(P)-binding domain [IPR016040] (1); Short-chain dehydrogenase/reductase SDR [IPR002347] (1)                                                                                                                                                                                                                                                                                                                                                                                                      | scaffold_4_mRNA_86.1            | -                           | -                               |
| GF0029514 | 1                            | 0                        | 0                            | 0 Hypothetical protein (1)                                                 |                                                                                                                                                                                                                                |                                                                                                                                                                                                                                                                                                                                                                                                                                                                                                     | scaffold_4_mRNA_843.1           | -                           | -                               |
| GF0029513 | 1                            | 0                        | 0                            | 0 Hypothetical protein (1)                                                 |                                                                                                                                                                                                                                | Domain of unknown function DUF4216 [IPR025312] (1)                                                                                                                                                                                                                                                                                                                                                                                                                                                  | scaffold_4_mRNA_839.1           | -                           | -                               |
| GF0029512 | 1                            | 0                        | 0                            | 0 Hypothetical protein (1)                                                 |                                                                                                                                                                                                                                | Probable transposase, Pta/Eta/Spm, plam [IPR004252] (1)                                                                                                                                                                                                                                                                                                                                                                                                                                             | scaffold_4_mRNA_834.1           | -                           | -                               |
| GF0029511 | 1                            | 0                        | 0                            | 0 Hypothetical protein (1)                                                 |                                                                                                                                                                                                                                |                                                                                                                                                                                                                                                                                                                                                                                                                                                                                                     | scaffold_4_mRNA_8.1             | -                           | -                               |
| GF0029510 | 1                            | 0                        | 0                            | 0 Hypothetical protein (1)                                                 |                                                                                                                                                                                                                                |                                                                                                                                                                                                                                                                                                                                                                                                                                                                                                     | scaffold_4_mRNA_798.1           | -                           | -                               |
| GF0029509 | 1                            | 0                        | 0                            | 0 Hypothetical protein (1)                                                 |                                                                                                                                                                                                                                |                                                                                                                                                                                                                                                                                                                                                                                                                                                                                                     | scaffold_4_mRNA_795.1           | -                           | -                               |
| GF0029508 | 1                            | 0                        | 0                            | 0 Hypothetical protein (1)                                                 |                                                                                                                                                                                                                                |                                                                                                                                                                                                                                                                                                                                                                                                                                                                                                     | scaffold_4_mRNA_793.1           | -                           | -                               |
| GF0029507 | 1                            | 0                        | 0                            | 0 Hypothetical protein (1)                                                 |                                                                                                                                                                                                                                |                                                                                                                                                                                                                                                                                                                                                                                                                                                                                                     | scaffold_4_mRNA_791.1           | -                           | -                               |
| GF0029506 | 1                            | 0                        | 0                            | 0 Hypothetical protein (1)                                                 |                                                                                                                                                                                                                                |                                                                                                                                                                                                                                                                                                                                                                                                                                                                                                     | scaffold_4_mRNA_790.1           | -                           | -                               |
| GF0029505 | 1                            | 0                        | 0                            | 0 Hypothetical protein (1)                                                 |                                                                                                                                                                                                                                |                                                                                                                                                                                                                                                                                                                                                                                                                                                                                                     | scaffold_4_mRNA_789.1           | -                           | -                               |
| GF0029504 | 1                            | 0                        | 0                            | 0 Hypothetical protein (1)                                                 |                                                                                                                                                                                                                                |                                                                                                                                                                                                                                                                                                                                                                                                                                                                                                     | scaffold_4_mRNA_788.1           | -                           | -                               |
| GF0029503 | 1                            | 0                        | 0                            | 0 Cytokinin riboside 5'-monophosphate phosphoribohydrolase (1)             |                                                                                                                                                                                                                                | LOG family [IPR031100] (1)                                                                                                                                                                                                                                                                                                                                                                                                                                                                          | scaffold_4_mRNA_787.1           | -                           | -                               |
| GF0029502 | 1                            | 0                        | 0                            | 0 Hypothetical protein (1)                                                 |                                                                                                                                                                                                                                |                                                                                                                                                                                                                                                                                                                                                                                                                                                                                                     | scaffold_4_mRNA_782.1           | -                           | -                               |
| GF0029501 | 1                            | 0                        | 0                            | 0 Hypothetical protein (1)                                                 |                                                                                                                                                                                                                                |                                                                                                                                                                                                                                                                                                                                                                                                                                                                                                     | scaffold_4_mRNA_781.1           | -                           | -                               |
| GF0029500 | 1                            | 0                        | 0                            | 0 Hypothetical protein (1)                                                 | aspartic-type endopeptidase activity [GO:0004190 molecular_function] (1); proteolysis [GO:0006508 biological_process] (1)                                                                                                      | Aspartic peptidase domain [IPR021109] (1); Aspartic peptidase, active site [IPR01069] (1)                                                                                                                                                                                                                                                                                                                                                                                                           | scaffold_4_mRNA_780.1           | -                           | -                               |
| GF0029499 | 1                            | 0                        | 0                            | 0 Hypothetical protein (1)                                                 |                                                                                                                                                                                                                                |                                                                                                                                                                                                                                                                                                                                                                                                                                                                                                     | scaffold_4_mRNA_776.1           | -                           | -                               |
| GF0029498 | 1                            | 0                        | 0                            | 0 Hypothetical protein (1)                                                 |                                                                                                                                                                                                                                |                                                                                                                                                                                                                                                                                                                                                                                                                                                                                                     | scaffold_4_mRNA_773.1           | -                           | -                               |
| GF0029497 | 1                            | 0                        | 0                            | 0 Hypothetical protein (1)                                                 |                                                                                                                                                                                                                                | LOG family [IPR031100] (1)                                                                                                                                                                                                                                                                                                                                                                                                                                                                          | scaffold_4_mRNA_77.1            | -                           | -                               |
| GF0029496 | 1                            | 0                        | 0                            | 0 Hypothetical protein (1)                                                 |                                                                                                                                                                                                                                |                                                                                                                                                                                                                                                                                                                                                                                                                                                                                                     | scaffold_4_mRNA_763.1           | -                           | -                               |
| GF0029495 | 1                            | 0                        | 0                            | 0 Putative non-LTR retroelement reverse transcriptase (1)                  |                                                                                                                                                                                                                                | Reverse transcriptase zinc-binding domain [IPR026960] (1); Reverse transcriptase domain [IPR000477] (1)                                                                                                                                                                                                                                                                                                                                                                                             | scaffold_4_mRNA_761.1           | -                           | -                               |
| GF0029494 | 1                            | 0                        | 0                            | 0 Hypothetical protein (1)                                                 |                                                                                                                                                                                                                                |                                                                                                                                                                                                                                                                                                                                                                                                                                                                                                     | scaffold_4_mRNA_759.1           | -                           | -                               |
| GF0029493 | 1                            | 0                        | 0                            | 0 Hypothetical protein (1)                                                 |                                                                                                                                                                                                                                | Retrosposon gag domain [IPR005162] (1); Aspartic peptidase domain [IPR021109] (1)                                                                                                                                                                                                                                                                                                                                                                                                                   | scaffold_4_mRNA_758.1           | -                           | -                               |
| GF0029492 | 1                            | 0                        | 0                            | 0 Retrotransposon protein, putative, Ty3-gypsy subclass, expressed (1)     |                                                                                                                                                                                                                                | Aspartic peptidase domain [IPR021109] (1)                                                                                                                                                                                                                                                                                                                                                                                                                                                           | scaffold_4_mRNA_757.1           | -                           | -                               |
| GF0029491 | 1                            | 0                        | 0                            | 0 Hypothetical protein (1)                                                 |                                                                                                                                                                                                                                |                                                                                                                                                                                                                                                                                                                                                                                                                                                                                                     | scaffold_4_mRNA_755.1           | -                           | -                               |
| GF0029490 | 1                            | 0                        | 0                            | 0 Hypothetical protein (1)                                                 |                                                                                                                                                                                                                                |                                                                                                                                                                                                                                                                                                                                                                                                                                                                                                     | scaffold_4_mRNA_754.1           | -                           | -                               |
| GF0029489 | 1                            | 0                        | 0                            | 0 Hypothetical protein (1)                                                 |                                                                                                                                                                                                                                | Retrosposon gag domain [IPR005162] (1)                                                                                                                                                                                                                                                                                                                                                                                                                                                              | scaffold_4_mRNA_753.1           | -                           | -                               |
| GF0029488 | 1                            | 0                        | 0                            | 0 Polynucleotidyl transferase, ribonuclease H-like superfamily protein (1) | nucleic acid binding [GO:0003676 molecular_function] (1)                                                                                                                                                                       | Harburger transposase-derived nuclease domain [IPR07806] (1); Ribonuclease H-like domain [IPR012337] (1)                                                                                                                                                                                                                                                                                                                                                                                            | scaffold_4_mRNA_751.1           | -                           | -                               |
| GF0029487 | 1                            | 0                        | 0                            | 0 Hypothetical protein (1)                                                 |                                                                                                                                                                                                                                |                                                                                                                                                                                                                                                                                                                                                                                                                                                                                                     | scaffold_4_mRNA_750.1           | -                           | -                               |
| GF0029486 | 1                            | 0                        | 0                            | 0 Hypothetical protein (1)                                                 | nucleic acid binding [GO:0003676 molecular_function] (1)                                                                                                                                                                       | Domain of unknown function DUF4371 [IPR025398] (1); Ribonuclease H-like domain [IPR012337] (1)                                                                                                                                                                                                                                                                                                                                                                                                      | scaffold_4_mRNA_748.1           | -                           | -                               |
| GF0029485 | 1                            | 0                        | 0                            | 0 Hypothetical protein (1)                                                 |                                                                                                                                                                                                                                |                                                                                                                                                                                                                                                                                                                                                                                                                                                                                                     | scaffold_4_mRNA_747.1           | -                           | -                               |
| GF0029484 | 1                            | 0                        | 0                            | 0 Hypothetical protein (1)                                                 |                                                                                                                                                                                                                                |                                                                                                                                                                                                                                                                                                                                                                                                                                                                                                     | scaffold_4_mRNA_745.1           | -                           | -                               |
| GF0029483 | 1                            | 0                        | 0                            | 0 Terpene cyclase/intase family member (1)                                 | intramolecular transferase activity [GO:0016866 molecular_function] (1)                                                                                                                                                        | Terpenoid cyclases/protein prenyltransferase alpha-alpha toroid [IPR008930] (1); Squalene cyclase, C-terminal [IPR032696] (1); Squalene cyclase [IPR018333] (1); Terpene synthase, conserved site [IPR002365] (1)                                                                                                                                                                                                                                                                                   | scaffold_4_mRNA_744.1           | -                           | -                               |
| GF0029482 | 1                            | 0                        | 0                            | 0 Cytokinin riboside 5'-monophosphate phosphoribohydrolase (1)             | nucleic acid binding [GO:0003676 molecular_function] (1); protein dimerization activity [GO:0046983 molecular_function] (1)                                                                                                    | HAT, C-terminal dimerization domain [IPR008906] (1); Ribonuclease H-like domain [IPR012337] (1); LOG family [IPR031100] (1)                                                                                                                                                                                                                                                                                                                                                                         | scaffold_4_mRNA_741.1           | -                           | -                               |
| GF0029481 | 1                            | 0                        | 0                            | 0 Hypothetical protein (1)                                                 |                                                                                                                                                                                                                                |                                                                                                                                                                                                                                                                                                                                                                                                                                                                                                     | scaffold_4_mRNA_740.1           | -                           | -                               |
| GF0029480 | 1                            | 0                        | 0                            | 0 Hypothetical protein (1)                                                 | zinc ion binding [GO:0008270 molecular_function] (1); nucleic acid binding [GO:0003676 molecular_function] (1)                                                                                                                 | Terpenoid cyclases/protein prenyltransferase alpha-alpha toroid [IPR008930] (1); Viral movement protein [IPR028919] (1); Zinc finger, CCHC-type [IPR01878] (1); Squalene cyclase, N-terminal [IPR032697] (1)                                                                                                                                                                                                                                                                                        | scaffold_4_mRNA_737.1           | -                           | -                               |
| GF0029479 | 1                            | 0                        | 0                            | 0 Hypothetical protein (1)                                                 |                                                                                                                                                                                                                                |                                                                                                                                                                                                                                                                                                                                                                                                                                                                                                     | scaffold_4_mRNA_736.1           | -                           | -                               |
| GF0029478 | 1                            | 0                        | 0                            | 0 Hypothetical protein (1)                                                 |                                                                                                                                                                                                                                |                                                                                                                                                                                                                                                                                                                                                                                                                                                                                                     | scaffold_4_mRNA_735.1           | -                           | -                               |
| GF0029477 | 1                            | 0                        | 0                            | 0 Terpene cyclase/intase family member (1)                                 | intramolecular transferase activity [GO:0016866 molecular_function] (1)                                                                                                                                                        | Squalene cyclase, C-terminal [IPR032696] (1); Squalene cyclase [IPR018333] (1); Squalene cyclase, N-terminal [IPR032697] (1); Terpenoid cyclases/protein prenyltransferase alpha-alpha toroid [IPR008930] (1)                                                                                                                                                                                                                                                                                       | scaffold_4_mRNA_733.1           | -                           | -                               |
| GF0029476 | 1                            | 0                        | 0                            | 0 Hypothetical protein (1)                                                 |                                                                                                                                                                                                                                | Domain of unknown function DUF632 [IPR006867] (1)                                                                                                                                                                                                                                                                                                                                                                                                                                                   | scaffold_4_mRNA_731.1           | -                           | -                               |
| GF0029475 | 1                            | 0                        | 0                            | 0 Terpene cyclase/intase family member (1)                                 |                                                                                                                                                                                                                                | Squalene cyclase, N-terminal [IPR032697] (1); Terpenoid cyclases/protein prenyltransferase alpha-alpha toroid [IPR008930] (1)                                                                                                                                                                                                                                                                                                                                                                       | scaffold_4_mRNA_729.1           | -                           | -                               |
| GF0029474 | 1                            | 0                        | 0                            | 0 Retrotransposon gag protein (1)                                          |                                                                                                                                                                                                                                | Retrosposon gag domain [IPR005162] (1)                                                                                                                                                                                                                                                                                                                                                                                                                                                              | scaffold_4_mRNA_725.1           | -                           | -                               |

| ID        | Num. in <i>C. clementiae</i> | Num. in <i>C. ustricta</i> | Num. in <i>P. trifoliate</i> | Note                                                                | GO                                                                                                                                                                                                                                                                                                                                                                                                                                                      | InterPro                                                                                                                                                                                                                                                                                                                                                                                                                                                                                                                                                                                                                                                                                                                                                                                                                                                                                                                                                                                                    | Members in <i>C. clementiae</i>                                                                                                                                                                                                                                                                                                                                                                                                                                                                                                                                                                                                                                                                                                                                                                                                                                                                                                                                                                             | Members in <i>C. ustricta</i> | Members in <i>P. trifoliate</i> |   |
|-----------|------------------------------|----------------------------|------------------------------|---------------------------------------------------------------------|---------------------------------------------------------------------------------------------------------------------------------------------------------------------------------------------------------------------------------------------------------------------------------------------------------------------------------------------------------------------------------------------------------------------------------------------------------|-------------------------------------------------------------------------------------------------------------------------------------------------------------------------------------------------------------------------------------------------------------------------------------------------------------------------------------------------------------------------------------------------------------------------------------------------------------------------------------------------------------------------------------------------------------------------------------------------------------------------------------------------------------------------------------------------------------------------------------------------------------------------------------------------------------------------------------------------------------------------------------------------------------------------------------------------------------------------------------------------------------|-------------------------------------------------------------------------------------------------------------------------------------------------------------------------------------------------------------------------------------------------------------------------------------------------------------------------------------------------------------------------------------------------------------------------------------------------------------------------------------------------------------------------------------------------------------------------------------------------------------------------------------------------------------------------------------------------------------------------------------------------------------------------------------------------------------------------------------------------------------------------------------------------------------------------------------------------------------------------------------------------------------|-------------------------------|---------------------------------|---|
| GF0029473 | 1                            | 0                          | 0                            | 0 Hypothetical protein (1)                                          |                                                                                                                                                                                                                                                                                                                                                                                                                                                         |                                                                                                                                                                                                                                                                                                                                                                                                                                                                                                                                                                                                                                                                                                                                                                                                                                                                                                                                                                                                             | scaffold_4_mRNA_721.1                                                                                                                                                                                                                                                                                                                                                                                                                                                                                                                                                                                                                                                                                                                                                                                                                                                                                                                                                                                       | -                             | -                               |   |
| GF0029472 | 1                            | 0                          | 0                            | 0 Cytokinin riboside 5'-monophosphate phosphoribohydrolase (1)      |                                                                                                                                                                                                                                                                                                                                                                                                                                                         | LOG family [IPR031100] (1); Cytokinin riboside 5'-monophosphate phosphoribohydrolase LOG [IPR005269] (1)                                                                                                                                                                                                                                                                                                                                                                                                                                                                                                                                                                                                                                                                                                                                                                                                                                                                                                    | scaffold_4_mRNA_720.1                                                                                                                                                                                                                                                                                                                                                                                                                                                                                                                                                                                                                                                                                                                                                                                                                                                                                                                                                                                       | -                             | -                               |   |
| GF0029471 | 1                            | 0                          | 0                            | 0 Hypothetical protein (1)                                          | nucleic acid binding [GO:0003676 molecular_function] (1)                                                                                                                                                                                                                                                                                                                                                                                                | Ribonuclease H-like domain [IPR012337] (1)                                                                                                                                                                                                                                                                                                                                                                                                                                                                                                                                                                                                                                                                                                                                                                                                                                                                                                                                                                  | scaffold_4_mRNA_719.1                                                                                                                                                                                                                                                                                                                                                                                                                                                                                                                                                                                                                                                                                                                                                                                                                                                                                                                                                                                       | -                             | -                               |   |
| GF0029470 | 1                            | 0                          | 0                            | 0 Hypothetical protein (1)                                          |                                                                                                                                                                                                                                                                                                                                                                                                                                                         |                                                                                                                                                                                                                                                                                                                                                                                                                                                                                                                                                                                                                                                                                                                                                                                                                                                                                                                                                                                                             | scaffold_4_mRNA_71.1                                                                                                                                                                                                                                                                                                                                                                                                                                                                                                                                                                                                                                                                                                                                                                                                                                                                                                                                                                                        | -                             | -                               |   |
| GF0029469 | 1                            | 0                          | 0                            | 0 Hypothetical protein (1)                                          | cysteine-type peptidase activity [GO:0008234 molecular_function] (1); proteolysis [GO:0006508 biological_process] (1)                                                                                                                                                                                                                                                                                                                                   | Upl1 protease family, C-terminal catalytic domain [IPR003653] (1)                                                                                                                                                                                                                                                                                                                                                                                                                                                                                                                                                                                                                                                                                                                                                                                                                                                                                                                                           | scaffold_4_mRNA_702.1                                                                                                                                                                                                                                                                                                                                                                                                                                                                                                                                                                                                                                                                                                                                                                                                                                                                                                                                                                                       | -                             | -                               |   |
| GF0029468 | 1                            | 0                          | 0                            | 0 Hypothetical protein (1)                                          | biosynthetic process [GO:0000058 biological_process] (1); hydrolase activity [GO:0016787 molecular_function] (1); ligase activity [GO:0016874 molecular_function] (1); protein binding [GO:0005515 molecular_function] (1); tetrahydrofolylpolyglutamate synthase activity [GO:004326 molecular_function] (1); folic acid-containing compound biosynthetic process [GO:0009396 biological_process] (1); ATP binding [GO:0005524 molecular_function] (1) | WD40-repeat-containing domain [IPR017986] (1); WD40 repeat [IPR001680] (1); WD40/YVTN repeat-like-containing domain [IPR015943] (1); Mur ligase, C-terminal [IPR044101] (1); Metallo-dependent phosphatase-like [IPR029052] (1); Folypolyglutamate synthetase, conserved site [IPR018109] (1); Folypolyglutamate synthetase [IPR016453] (1); Serine/threonine-specific protein phosphatase/bis(5-methylsilyl)octanophosphate [IPR006186] (1); Serine-threonine protein phosphatase, N-terminal [IPR031675] (1); Calcineurin-like phosphoesterase domain, Apaf1 type [IPR004843] (1); Mur ligase, central [IPR013221] (1); Protein kinase domain [IPR000719] (1); Protein kinase-like domain [IPR011009] (1); Leucine-rich repeat domain, L domain-like [IPR032675] (1); Leucine-rich repeat, typical subtype [IPR003591] (1); Serine-threonine/tyrosine-protein kinase, catalytic domain [IPR001245] (1); Serine/threonine-protein kinase, active site [IPR008271] (1); Leucine-rich repeat [IPR016111] (1) | WD40-repeat-containing domain [IPR017986] (1); WD40 repeat [IPR001680] (1); WD40/YVTN repeat-like-containing domain [IPR015943] (1); Mur ligase, C-terminal [IPR044101] (1); Metallo-dependent phosphatase-like [IPR029052] (1); Folypolyglutamate synthetase, conserved site [IPR018109] (1); Folypolyglutamate synthetase [IPR016453] (1); Serine/threonine-specific protein phosphatase/bis(5-methylsilyl)octanophosphate [IPR006186] (1); Serine-threonine protein phosphatase, N-terminal [IPR031675] (1); Calcineurin-like phosphoesterase domain, Apaf1 type [IPR004843] (1); Mur ligase, central [IPR013221] (1); Protein kinase domain [IPR000719] (1); Protein kinase-like domain [IPR011009] (1); Leucine-rich repeat domain, L domain-like [IPR032675] (1); Leucine-rich repeat, typical subtype [IPR003591] (1); Serine-threonine/tyrosine-protein kinase, catalytic domain [IPR001245] (1); Serine/threonine-protein kinase, active site [IPR008271] (1); Leucine-rich repeat [IPR016111] (1) | scaffold_4_mRNA_70.1          | -                               | - |
| GF0029467 | 1                            | 0                          | 0                            | 0 LRR receptor-like kinase family protein (1)                       | protein kinase activity [GO:0004672 molecular_function] (1); protein phosphorylation [GO:0006468 biological_process] (1); ATP binding [GO:0005524 molecular_function] (1); protein binding [GO:0005515 molecular_function] (1)                                                                                                                                                                                                                          | Protein kinase domain [IPR000719] (1); Protein kinase-like domain [IPR011009] (1); Leucine-rich repeat domain, L domain-like [IPR032675] (1); Leucine-rich repeat, typical subtype [IPR003591] (1); Serine-threonine/tyrosine-protein kinase, catalytic domain [IPR001245] (1); Serine/threonine-protein kinase, active site [IPR008271] (1); Leucine-rich repeat [IPR016111] (1)                                                                                                                                                                                                                                                                                                                                                                                                                                                                                                                                                                                                                           | scaffold_4_mRNA_698.1                                                                                                                                                                                                                                                                                                                                                                                                                                                                                                                                                                                                                                                                                                                                                                                                                                                                                                                                                                                       | -                             | -                               |   |
| GF0029466 | 1                            | 0                          | 0                            | 0 GDSL-motif lipase 7 (1)                                           | hydrolase activity, acting on ester bonds [GO:0016788 molecular_function] (1)                                                                                                                                                                                                                                                                                                                                                                           | SCN2L hydrolase-type esterase domain [IPR018300] (1); GDSL lipase/esterase [IPR010877] (1)                                                                                                                                                                                                                                                                                                                                                                                                                                                                                                                                                                                                                                                                                                                                                                                                                                                                                                                  | scaffold_4_mRNA_696.1                                                                                                                                                                                                                                                                                                                                                                                                                                                                                                                                                                                                                                                                                                                                                                                                                                                                                                                                                                                       | -                             | -                               |   |
| GF0029465 | 1                            | 0                          | 0                            | 0 Hypothetical protein (1)                                          |                                                                                                                                                                                                                                                                                                                                                                                                                                                         |                                                                                                                                                                                                                                                                                                                                                                                                                                                                                                                                                                                                                                                                                                                                                                                                                                                                                                                                                                                                             | scaffold_4_mRNA_692.1                                                                                                                                                                                                                                                                                                                                                                                                                                                                                                                                                                                                                                                                                                                                                                                                                                                                                                                                                                                       | -                             | -                               |   |
| GF0029464 | 1                            | 0                          | 0                            | 0 Hypothetical protein (1)                                          |                                                                                                                                                                                                                                                                                                                                                                                                                                                         |                                                                                                                                                                                                                                                                                                                                                                                                                                                                                                                                                                                                                                                                                                                                                                                                                                                                                                                                                                                                             | scaffold_4_mRNA_690.1                                                                                                                                                                                                                                                                                                                                                                                                                                                                                                                                                                                                                                                                                                                                                                                                                                                                                                                                                                                       | -                             | -                               |   |
| GF0029463 | 1                            | 0                          | 0                            | 0 Hypothetical protein (1)                                          |                                                                                                                                                                                                                                                                                                                                                                                                                                                         | Transposase-associated domain [IPR029480] (1)                                                                                                                                                                                                                                                                                                                                                                                                                                                                                                                                                                                                                                                                                                                                                                                                                                                                                                                                                               | scaffold_4_mRNA_677.1                                                                                                                                                                                                                                                                                                                                                                                                                                                                                                                                                                                                                                                                                                                                                                                                                                                                                                                                                                                       | -                             | -                               |   |
| GF0029462 | 1                            | 0                          | 0                            | 0 Hypothetical protein (1)                                          |                                                                                                                                                                                                                                                                                                                                                                                                                                                         |                                                                                                                                                                                                                                                                                                                                                                                                                                                                                                                                                                                                                                                                                                                                                                                                                                                                                                                                                                                                             | scaffold_4_mRNA_676.1                                                                                                                                                                                                                                                                                                                                                                                                                                                                                                                                                                                                                                                                                                                                                                                                                                                                                                                                                                                       | -                             | -                               |   |
| GF0029461 | 1                            | 0                          | 0                            | 0 Hypothetical protein (1)                                          |                                                                                                                                                                                                                                                                                                                                                                                                                                                         |                                                                                                                                                                                                                                                                                                                                                                                                                                                                                                                                                                                                                                                                                                                                                                                                                                                                                                                                                                                                             | scaffold_4_mRNA_671.1                                                                                                                                                                                                                                                                                                                                                                                                                                                                                                                                                                                                                                                                                                                                                                                                                                                                                                                                                                                       | -                             | -                               |   |
| GF0029460 | 1                            | 0                          | 0                            | 0 Hypothetical protein (1)                                          | protein binding [GO:0005515 molecular_function] (1)                                                                                                                                                                                                                                                                                                                                                                                                     | Leucine-rich repeat domain, L domain-like [IPR032675] (1); Leucine-rich repeat [IPR016111] (1)                                                                                                                                                                                                                                                                                                                                                                                                                                                                                                                                                                                                                                                                                                                                                                                                                                                                                                              | scaffold_4_mRNA_667.1                                                                                                                                                                                                                                                                                                                                                                                                                                                                                                                                                                                                                                                                                                                                                                                                                                                                                                                                                                                       | -                             | -                               |   |
| GF0029459 | 1                            | 0                          | 0                            | 0 LRR receptor-like serine/threonine-protein kinase FLS2 (1)        | protein binding [GO:0005515 molecular_function] (1)                                                                                                                                                                                                                                                                                                                                                                                                     | Leucine-rich repeat domain, L domain-like [IPR032675] (1); Leucine-rich repeat, typical subtype [IPR003591] (1); Leucine-rich repeat [IPR016111] (1); Leucine-rich repeat-containing N-terminal, plant-type [IPR013210] (1)                                                                                                                                                                                                                                                                                                                                                                                                                                                                                                                                                                                                                                                                                                                                                                                 | scaffold_4_mRNA_666.1                                                                                                                                                                                                                                                                                                                                                                                                                                                                                                                                                                                                                                                                                                                                                                                                                                                                                                                                                                                       | -                             | -                               |   |
| GF0029458 | 1                            | 0                          | 0                            | 0 Hypothetical protein (1)                                          |                                                                                                                                                                                                                                                                                                                                                                                                                                                         |                                                                                                                                                                                                                                                                                                                                                                                                                                                                                                                                                                                                                                                                                                                                                                                                                                                                                                                                                                                                             | scaffold_4_mRNA_658.1                                                                                                                                                                                                                                                                                                                                                                                                                                                                                                                                                                                                                                                                                                                                                                                                                                                                                                                                                                                       | -                             | -                               |   |
| GF0029457 | 1                            | 0                          | 0                            | 0 Hypothetical protein (1)                                          |                                                                                                                                                                                                                                                                                                                                                                                                                                                         |                                                                                                                                                                                                                                                                                                                                                                                                                                                                                                                                                                                                                                                                                                                                                                                                                                                                                                                                                                                                             | scaffold_4_mRNA_655.1                                                                                                                                                                                                                                                                                                                                                                                                                                                                                                                                                                                                                                                                                                                                                                                                                                                                                                                                                                                       | -                             | -                               |   |
| GF0029456 | 1                            | 0                          | 0                            | 0 Hypothetical protein (1)                                          |                                                                                                                                                                                                                                                                                                                                                                                                                                                         |                                                                                                                                                                                                                                                                                                                                                                                                                                                                                                                                                                                                                                                                                                                                                                                                                                                                                                                                                                                                             | scaffold_4_mRNA_651.1                                                                                                                                                                                                                                                                                                                                                                                                                                                                                                                                                                                                                                                                                                                                                                                                                                                                                                                                                                                       | -                             | -                               |   |
| GF0029455 | 1                            | 0                          | 0                            | 0 Hypothetical protein (1)                                          | nucleic acid binding [GO:0003676 molecular_function] (1)                                                                                                                                                                                                                                                                                                                                                                                                | Reverse transcriptase zinc-binding domain [IPR025960] (1); Ribonuclease H-like domain [IPR012337] (1)                                                                                                                                                                                                                                                                                                                                                                                                                                                                                                                                                                                                                                                                                                                                                                                                                                                                                                       | scaffold_4_mRNA_654.1                                                                                                                                                                                                                                                                                                                                                                                                                                                                                                                                                                                                                                                                                                                                                                                                                                                                                                                                                                                       | -                             | -                               |   |
| GF0029454 | 1                            | 0                          | 0                            | 0 LRR receptor-like serine/threonine-protein kinase FLS2 (1)        |                                                                                                                                                                                                                                                                                                                                                                                                                                                         | Leucine-rich repeat-containing N-terminal, plant-type [IPR013210] (1); Leucine-rich repeat domain, L domain-like [IPR032675] (1); Leucine-rich repeat, typical subtype [IPR003591] (1)                                                                                                                                                                                                                                                                                                                                                                                                                                                                                                                                                                                                                                                                                                                                                                                                                      | scaffold_4_mRNA_652.1                                                                                                                                                                                                                                                                                                                                                                                                                                                                                                                                                                                                                                                                                                                                                                                                                                                                                                                                                                                       | -                             | -                               |   |
| GF0029453 | 1                            | 0                          | 0                            | 0 Hypothetical protein (1)                                          | proteolysis [GO:0006508 biological_process] (1); cysteine-type peptidase activity [GO:0008234 molecular_function] (1)                                                                                                                                                                                                                                                                                                                                   | Upl1 protease family, C-terminal catalytic domain [IPR003653] (1)                                                                                                                                                                                                                                                                                                                                                                                                                                                                                                                                                                                                                                                                                                                                                                                                                                                                                                                                           | scaffold_4_mRNA_651.1                                                                                                                                                                                                                                                                                                                                                                                                                                                                                                                                                                                                                                                                                                                                                                                                                                                                                                                                                                                       | -                             | -                               |   |
| GF0029452 | 1                            | 0                          | 0                            | 0 Hypothetical protein (1)                                          |                                                                                                                                                                                                                                                                                                                                                                                                                                                         |                                                                                                                                                                                                                                                                                                                                                                                                                                                                                                                                                                                                                                                                                                                                                                                                                                                                                                                                                                                                             | scaffold_4_mRNA_644.1                                                                                                                                                                                                                                                                                                                                                                                                                                                                                                                                                                                                                                                                                                                                                                                                                                                                                                                                                                                       | -                             | -                               |   |
| GF0029451 | 1                            | 0                          | 0                            | 0 Hypothetical protein (1)                                          |                                                                                                                                                                                                                                                                                                                                                                                                                                                         |                                                                                                                                                                                                                                                                                                                                                                                                                                                                                                                                                                                                                                                                                                                                                                                                                                                                                                                                                                                                             | scaffold_4_mRNA_642.1                                                                                                                                                                                                                                                                                                                                                                                                                                                                                                                                                                                                                                                                                                                                                                                                                                                                                                                                                                                       | -                             | -                               |   |
| GF0029450 | 1                            | 0                          | 0                            | 0 Hypothetical protein (1)                                          |                                                                                                                                                                                                                                                                                                                                                                                                                                                         |                                                                                                                                                                                                                                                                                                                                                                                                                                                                                                                                                                                                                                                                                                                                                                                                                                                                                                                                                                                                             | scaffold_4_mRNA_64.1                                                                                                                                                                                                                                                                                                                                                                                                                                                                                                                                                                                                                                                                                                                                                                                                                                                                                                                                                                                        | -                             | -                               |   |
| GF0029449 | 1                            | 0                          | 0                            | 0 Caffeic acid 3-O-methyltransferase (1)                            | O-methyltransferase activity [GO:0008171 molecular_function] (1); protein dimerization activity [GO:0046983 molecular_function] (1); methyltransferase activity [GO:0005168 molecular_function] (1)                                                                                                                                                                                                                                                     | S-adenosyl-L-methionine-dependent methyltransferase [IPR029063] (1); O-methyltransferase COMT-type [IPR016461] (1); Plant methyltransferase dimerization [IPR029671] (1); O-methyltransferase, family 2 [IPR010777] (1); Winged helix-turn-helix DNA-binding domain [IPR011991] (1)                                                                                                                                                                                                                                                                                                                                                                                                                                                                                                                                                                                                                                                                                                                         | scaffold_4_mRNA_639.1                                                                                                                                                                                                                                                                                                                                                                                                                                                                                                                                                                                                                                                                                                                                                                                                                                                                                                                                                                                       | -                             | -                               |   |
| GF0029448 | 1                            | 0                          | 0                            | 0 Hypothetical protein (1)                                          |                                                                                                                                                                                                                                                                                                                                                                                                                                                         |                                                                                                                                                                                                                                                                                                                                                                                                                                                                                                                                                                                                                                                                                                                                                                                                                                                                                                                                                                                                             | scaffold_4_mRNA_635.1                                                                                                                                                                                                                                                                                                                                                                                                                                                                                                                                                                                                                                                                                                                                                                                                                                                                                                                                                                                       | -                             | -                               |   |
| GF0029447 | 1                            | 0                          | 0                            | 0 Hypothetical protein (1)                                          | DNA binding [GO:0003677 molecular_function] (1); nucleic acid binding [GO:0003676 molecular_function] (1)                                                                                                                                                                                                                                                                                                                                               | Zinc finger C2H2-type [IPR013087] (1); Zinc finger, BED-type [IPR003656] (1)                                                                                                                                                                                                                                                                                                                                                                                                                                                                                                                                                                                                                                                                                                                                                                                                                                                                                                                                | scaffold_4_mRNA_629.1                                                                                                                                                                                                                                                                                                                                                                                                                                                                                                                                                                                                                                                                                                                                                                                                                                                                                                                                                                                       | -                             | -                               |   |
| GF0029446 | 1                            | 0                          | 0                            | 0 Caffeic acid 3-O-methyltransferase (1)                            | O-methyltransferase activity [GO:0008171 molecular_function] (1); methyltransferase activity [GO:0005168 molecular_function] (1)                                                                                                                                                                                                                                                                                                                        | S-adenosyl-L-methionine-dependent methyltransferase [IPR029063] (1); O-methyltransferase COMT-type [IPR016461] (1); O-methyltransferase, family 2 [IPR010777] (1)                                                                                                                                                                                                                                                                                                                                                                                                                                                                                                                                                                                                                                                                                                                                                                                                                                           | scaffold_4_mRNA_628.1                                                                                                                                                                                                                                                                                                                                                                                                                                                                                                                                                                                                                                                                                                                                                                                                                                                                                                                                                                                       | -                             | -                               |   |
| GF0029445 | 1                            | 0                          | 0                            | 0 Hypothetical protein (1)                                          |                                                                                                                                                                                                                                                                                                                                                                                                                                                         | Alpha/Beta hydrolase fold [IPR029058] (1); Serine aminopeptidase, S33 [IPR022742] (1)                                                                                                                                                                                                                                                                                                                                                                                                                                                                                                                                                                                                                                                                                                                                                                                                                                                                                                                       | scaffold_4_mRNA_627.1                                                                                                                                                                                                                                                                                                                                                                                                                                                                                                                                                                                                                                                                                                                                                                                                                                                                                                                                                                                       | -                             | -                               |   |
| GF0029444 | 1                            | 0                          | 0                            | 0 Hypothetical protein (1)                                          |                                                                                                                                                                                                                                                                                                                                                                                                                                                         | Anabiosipis retrotransposon Orf1 [IPR004312] (1)                                                                                                                                                                                                                                                                                                                                                                                                                                                                                                                                                                                                                                                                                                                                                                                                                                                                                                                                                            | scaffold_4_mRNA_623.1                                                                                                                                                                                                                                                                                                                                                                                                                                                                                                                                                                                                                                                                                                                                                                                                                                                                                                                                                                                       | -                             | -                               |   |
| GF0029443 | 1                            | 0                          | 0                            | 0 Hypothetical protein (1)                                          |                                                                                                                                                                                                                                                                                                                                                                                                                                                         |                                                                                                                                                                                                                                                                                                                                                                                                                                                                                                                                                                                                                                                                                                                                                                                                                                                                                                                                                                                                             | scaffold_4_mRNA_621.1                                                                                                                                                                                                                                                                                                                                                                                                                                                                                                                                                                                                                                                                                                                                                                                                                                                                                                                                                                                       | -                             | -                               |   |
| GF0029442 | 1                            | 0                          | 0                            | 0 Hypothetical protein (1)                                          |                                                                                                                                                                                                                                                                                                                                                                                                                                                         |                                                                                                                                                                                                                                                                                                                                                                                                                                                                                                                                                                                                                                                                                                                                                                                                                                                                                                                                                                                                             | scaffold_4_mRNA_620.1                                                                                                                                                                                                                                                                                                                                                                                                                                                                                                                                                                                                                                                                                                                                                                                                                                                                                                                                                                                       | -                             | -                               |   |
| GF0029441 | 1                            | 0                          | 0                            | 0 Hypothetical protein (1)                                          |                                                                                                                                                                                                                                                                                                                                                                                                                                                         |                                                                                                                                                                                                                                                                                                                                                                                                                                                                                                                                                                                                                                                                                                                                                                                                                                                                                                                                                                                                             | scaffold_4_mRNA_619.1                                                                                                                                                                                                                                                                                                                                                                                                                                                                                                                                                                                                                                                                                                                                                                                                                                                                                                                                                                                       | -                             | -                               |   |
| GF0029440 | 1                            | 0                          | 0                            | 0 Hypothetical protein (1)                                          |                                                                                                                                                                                                                                                                                                                                                                                                                                                         |                                                                                                                                                                                                                                                                                                                                                                                                                                                                                                                                                                                                                                                                                                                                                                                                                                                                                                                                                                                                             | scaffold_4_mRNA_617.1                                                                                                                                                                                                                                                                                                                                                                                                                                                                                                                                                                                                                                                                                                                                                                                                                                                                                                                                                                                       | -                             | -                               |   |
| GF0029439 | 1                            | 0                          | 0                            | 0 Putative Ruda gap-pol polyprotein (1)                             | zinc ion binding [GO:0008270 molecular_function] (1); nucleic acid binding [GO:0003676 molecular_function] (1)                                                                                                                                                                                                                                                                                                                                          | Zinc finger, CCHC-type [IPR001878] (1); Domain of unknown function DUF4219 [IPR025314] (1)                                                                                                                                                                                                                                                                                                                                                                                                                                                                                                                                                                                                                                                                                                                                                                                                                                                                                                                  | scaffold_4_mRNA_607.1                                                                                                                                                                                                                                                                                                                                                                                                                                                                                                                                                                                                                                                                                                                                                                                                                                                                                                                                                                                       | -                             | -                               |   |
| GF0029438 | 1                            | 0                          | 0                            | 0 Hypothetical protein (1)                                          | nucleic acid binding [GO:0003676 molecular_function] (1); DNA binding [GO:0003677 molecular_function] (1)                                                                                                                                                                                                                                                                                                                                               | Ribonuclease H-like domain [IPR012337] (1); hAT-like transposase, RNase-H fold [IPR025252] (1)                                                                                                                                                                                                                                                                                                                                                                                                                                                                                                                                                                                                                                                                                                                                                                                                                                                                                                              | scaffold_4_mRNA_606.1                                                                                                                                                                                                                                                                                                                                                                                                                                                                                                                                                                                                                                                                                                                                                                                                                                                                                                                                                                                       | -                             | -                               |   |
| GF0029437 | 1                            | 0                          | 0                            | 0 Hypothetical protein (1)                                          |                                                                                                                                                                                                                                                                                                                                                                                                                                                         | Retrotransposon gag domain [IPR005162] (1)                                                                                                                                                                                                                                                                                                                                                                                                                                                                                                                                                                                                                                                                                                                                                                                                                                                                                                                                                                  | scaffold_4_mRNA_597.1                                                                                                                                                                                                                                                                                                                                                                                                                                                                                                                                                                                                                                                                                                                                                                                                                                                                                                                                                                                       | -                             | -                               |   |
| GF0029436 | 1                            | 0                          | 0                            | 0 Hypothetical protein (1)                                          |                                                                                                                                                                                                                                                                                                                                                                                                                                                         | Retrotransposon gag domain [IPR005162] (1)                                                                                                                                                                                                                                                                                                                                                                                                                                                                                                                                                                                                                                                                                                                                                                                                                                                                                                                                                                  | scaffold_4_mRNA_594.1                                                                                                                                                                                                                                                                                                                                                                                                                                                                                                                                                                                                                                                                                                                                                                                                                                                                                                                                                                                       | -                             | -                               |   |
| GF0029435 | 1                            | 0                          | 0                            | 0 Hypothetical protein (1)                                          |                                                                                                                                                                                                                                                                                                                                                                                                                                                         |                                                                                                                                                                                                                                                                                                                                                                                                                                                                                                                                                                                                                                                                                                                                                                                                                                                                                                                                                                                                             | scaffold_4_mRNA_593.1                                                                                                                                                                                                                                                                                                                                                                                                                                                                                                                                                                                                                                                                                                                                                                                                                                                                                                                                                                                       | -                             | -                               |   |
| GF0029434 | 1                            | 0                          | 0                            | 0 Hypothetical protein (1)                                          |                                                                                                                                                                                                                                                                                                                                                                                                                                                         |                                                                                                                                                                                                                                                                                                                                                                                                                                                                                                                                                                                                                                                                                                                                                                                                                                                                                                                                                                                                             | scaffold_4_mRNA_592.1                                                                                                                                                                                                                                                                                                                                                                                                                                                                                                                                                                                                                                                                                                                                                                                                                                                                                                                                                                                       | -                             | -                               |   |
| GF0029433 | 1                            | 0                          | 0                            | 0 Protease inhibitor/seed storage/lipid transfer family protein (1) |                                                                                                                                                                                                                                                                                                                                                                                                                                                         | Bifunctional inhibitor/plant lipid transfer protein/seed storage helical domain [IPR016140] (1)                                                                                                                                                                                                                                                                                                                                                                                                                                                                                                                                                                                                                                                                                                                                                                                                                                                                                                             | scaffold_4_mRNA_58.1                                                                                                                                                                                                                                                                                                                                                                                                                                                                                                                                                                                                                                                                                                                                                                                                                                                                                                                                                                                        | -                             | -                               |   |
| GF0029432 | 1                            | 0                          | 0                            | 0 Mutator-like transposase (1)                                      | zinc ion binding [GO:0008270 molecular_function] (1)                                                                                                                                                                                                                                                                                                                                                                                                    | Zinc finger, SWM-type [IPR007527] (1); MULE transposase domain [IPR018289] (1); Zinc finger, PMZ-type [IPR005654] (1); Transposase, MuDR, plant [IPR004332] (1)                                                                                                                                                                                                                                                                                                                                                                                                                                                                                                                                                                                                                                                                                                                                                                                                                                             | scaffold_4_mRNA_557.1                                                                                                                                                                                                                                                                                                                                                                                                                                                                                                                                                                                                                                                                                                                                                                                                                                                                                                                                                                                       | -                             | -                               |   |
| GF0029431 | 1                            | 0                          | 0                            | 0 Hypothetical protein (1)                                          |                                                                                                                                                                                                                                                                                                                                                                                                                                                         |                                                                                                                                                                                                                                                                                                                                                                                                                                                                                                                                                                                                                                                                                                                                                                                                                                                                                                                                                                                                             | scaffold_4_mRNA_550.1                                                                                                                                                                                                                                                                                                                                                                                                                                                                                                                                                                                                                                                                                                                                                                                                                                                                                                                                                                                       | -                             | -                               |   |
| GF0029430 | 1                            | 0                          | 0                            | 0 17.5 kDa class I heat shock protein (1)                           |                                                                                                                                                                                                                                                                                                                                                                                                                                                         | Small heat shock protein HSP20 [IPR031107] (1); HSP20-like chaperone [IPR008978] (1); Alpha crystallin/Hsp20 domain [IPR002068] (1)                                                                                                                                                                                                                                                                                                                                                                                                                                                                                                                                                                                                                                                                                                                                                                                                                                                                         | scaffold_4_mRNA_53.1                                                                                                                                                                                                                                                                                                                                                                                                                                                                                                                                                                                                                                                                                                                                                                                                                                                                                                                                                                                        | -                             | -                               |   |
| GF0029429 | 1                            | 0                          | 0                            | 0 SET domain protein (1)                                            |                                                                                                                                                                                                                                                                                                                                                                                                                                                         |                                                                                                                                                                                                                                                                                                                                                                                                                                                                                                                                                                                                                                                                                                                                                                                                                                                                                                                                                                                                             | scaffold_4_mRNA_496.1                                                                                                                                                                                                                                                                                                                                                                                                                                                                                                                                                                                                                                                                                                                                                                                                                                                                                                                                                                                       | -                             | -                               |   |
| GF0029428 | 1                            | 0                          | 0                            | 0 Heat shock protein (1)                                            |                                                                                                                                                                                                                                                                                                                                                                                                                                                         | Alpha crystallin/Hsp20 domain [IPR002068] (1); HSP20-like chaperone [IPR008978] (1); Epitaxial SK propeptide/protease inhibitor I9 [IPR010259] (1); Small heat shock protein HSP20 [IPR031107] (1)                                                                                                                                                                                                                                                                                                                                                                                                                                                                                                                                                                                                                                                                                                                                                                                                          | scaffold_4_mRNA_49.1                                                                                                                                                                                                                                                                                                                                                                                                                                                                                                                                                                                                                                                                                                                                                                                                                                                                                                                                                                                        | -                             | -                               |   |
| GF0029427 | 1                            | 0                          | 0                            | 0 SCF ubiquitin ligase, SKP1 component (1)                          | ubiquitin-dependent protein catabolic process [GO:0006511 biological_process] (1)                                                                                                                                                                                                                                                                                                                                                                       | SKP1/BTB/POZ domain [IPR011333] (1); SKP1 component, dimerization [IPR016072] (1); SKP1 component, POZ domain [IPR016073] (1); S-phase kinase-associated protein 1 [IPR016897] (1); S-phase kinase-associated protein 1-like [IPR001232] (1)                                                                                                                                                                                                                                                                                                                                                                                                                                                                                                                                                                                                                                                                                                                                                                | scaffold_4_mRNA_458.1                                                                                                                                                                                                                                                                                                                                                                                                                                                                                                                                                                                                                                                                                                                                                                                                                                                                                                                                                                                       | -                             | -                               |   |
| GF0029426 | 1                            | 0                          | 0                            | 0 Hypothetical protein (1)                                          | protein dimerization activity [GO:0046983 molecular_function] (1); nucleic acid binding [GO:0003676 molecular_function] (1)                                                                                                                                                                                                                                                                                                                             | HAT, C-terminal dimerization domain [IPR008961] (1); Domain of unknown function DUF4371 [IPR025390] (1); Ribonuclease H-like domain [IPR012337] (1)                                                                                                                                                                                                                                                                                                                                                                                                                                                                                                                                                                                                                                                                                                                                                                                                                                                         | scaffold_4_mRNA_452.1                                                                                                                                                                                                                                                                                                                                                                                                                                                                                                                                                                                                                                                                                                                                                                                                                                                                                                                                                                                       | -                             | -                               |   |

| ID        | Num. in <i>C. caryophyllata</i> | Num. in <i>C. uchiha</i> | Num. in <i>P. trifoliata</i> | Note                                                             | GO                                                                                                                                                                                                                                                                                                                                                                                                                                                                                                                                                                                                                                                                                                                        | InterPro                                                                                                                                                                                                                                                                                                                                                                                                   | Members in <i>C. caryophyllata</i> | Members in <i>C. uchiha</i> | Members in <i>P. trifoliata</i> |
|-----------|---------------------------------|--------------------------|------------------------------|------------------------------------------------------------------|---------------------------------------------------------------------------------------------------------------------------------------------------------------------------------------------------------------------------------------------------------------------------------------------------------------------------------------------------------------------------------------------------------------------------------------------------------------------------------------------------------------------------------------------------------------------------------------------------------------------------------------------------------------------------------------------------------------------------|------------------------------------------------------------------------------------------------------------------------------------------------------------------------------------------------------------------------------------------------------------------------------------------------------------------------------------------------------------------------------------------------------------|------------------------------------|-----------------------------|---------------------------------|
| GF0029425 | 1                               | 0                        | 0                            | 0 F-box protein At2g39490 (1)                                    | protein binding [GO:0005515 molecular_function] (1)                                                                                                                                                                                                                                                                                                                                                                                                                                                                                                                                                                                                                                                                       | Leucine-rich repeat domain, L domain-like [IPR032675] (1); F-box domain [IPR01810] (1)                                                                                                                                                                                                                                                                                                                     | scaffold_4_mRNA_432.1              | -                           | -                               |
| GF0029424 | 1                               | 0                        | 0                            | 0 Hypothetical protein (1)                                       |                                                                                                                                                                                                                                                                                                                                                                                                                                                                                                                                                                                                                                                                                                                           |                                                                                                                                                                                                                                                                                                                                                                                                            | scaffold_4_mRNA_42.1               | -                           | -                               |
| GF0029423 | 1                               | 0                        | 0                            | 0 Hypothetical protein (1)                                       |                                                                                                                                                                                                                                                                                                                                                                                                                                                                                                                                                                                                                                                                                                                           |                                                                                                                                                                                                                                                                                                                                                                                                            | scaffold_4_mRNA_417.1              | -                           | -                               |
| GF0029422 | 1                               | 0                        | 0                            | 0 Monosaccharide transport protein (1)                           |                                                                                                                                                                                                                                                                                                                                                                                                                                                                                                                                                                                                                                                                                                                           |                                                                                                                                                                                                                                                                                                                                                                                                            | scaffold_4_mRNA_41.1               | -                           | -                               |
| GF0029421 | 1                               | 0                        | 0                            | 0 CASP-like protein 4C1 (1)                                      |                                                                                                                                                                                                                                                                                                                                                                                                                                                                                                                                                                                                                                                                                                                           | Domain of unknown function DUF588 [IPR06702] (1)                                                                                                                                                                                                                                                                                                                                                           | scaffold_4_mRNA_409.1              | -                           | -                               |
| GF0029420 | 1                               | 0                        | 0                            | 0 Hypothetical protein (1)                                       |                                                                                                                                                                                                                                                                                                                                                                                                                                                                                                                                                                                                                                                                                                                           | Retransposon gag domain [IPR005162] (1)                                                                                                                                                                                                                                                                                                                                                                    | scaffold_4_mRNA_392.1              | -                           | -                               |
| GF0029419 | 1                               | 0                        | 0                            | 0 Monosaccharide transport protein (1)                           |                                                                                                                                                                                                                                                                                                                                                                                                                                                                                                                                                                                                                                                                                                                           |                                                                                                                                                                                                                                                                                                                                                                                                            | scaffold_4_mRNA_391.1              | -                           | -                               |
| GF0029418 | 1                               | 0                        | 0                            | 0 Hypothetical protein (1)                                       |                                                                                                                                                                                                                                                                                                                                                                                                                                                                                                                                                                                                                                                                                                                           |                                                                                                                                                                                                                                                                                                                                                                                                            | scaffold_4_mRNA_390.1              | -                           | -                               |
| GF0029417 | 1                               | 0                        | 0                            | 0 Hypothetical protein (1)                                       |                                                                                                                                                                                                                                                                                                                                                                                                                                                                                                                                                                                                                                                                                                                           | F-box associated interaction domain [IPR017451] (1)                                                                                                                                                                                                                                                                                                                                                        | scaffold_4_mRNA_384.1              | -                           | -                               |
| GF0029416 | 1                               | 0                        | 0                            | 0 Cysteine/histidine-rich C1 domain protein (1)                  | intracellular signal transduction [GO:0035556 biological_process] (1); zinc ion binding [GO:0008270 molecular_function] (1)                                                                                                                                                                                                                                                                                                                                                                                                                                                                                                                                                                                               | DC1 [IPR004146] (1); Zinc finger, ZZ-type [IPR000433] (1); Protein kinase C-like, phorbol ester/diacylglycerol-binding domain [IPR002219] (1)                                                                                                                                                                                                                                                              | scaffold_4_mRNA_373.1              | -                           | -                               |
| GF0029415 | 1                               | 0                        | 0                            | 0 Monosaccharide transport protein (1)                           |                                                                                                                                                                                                                                                                                                                                                                                                                                                                                                                                                                                                                                                                                                                           |                                                                                                                                                                                                                                                                                                                                                                                                            | scaffold_4_mRNA_363.1              | -                           | -                               |
| GF0029414 | 1                               | 0                        | 0                            | 0 Hypothetical protein (1)                                       |                                                                                                                                                                                                                                                                                                                                                                                                                                                                                                                                                                                                                                                                                                                           |                                                                                                                                                                                                                                                                                                                                                                                                            | scaffold_4_mRNA_328.6              | -                           | -                               |
| GF0029413 | 1                               | 0                        | 0                            | 0 Hypothetical protein (1)                                       |                                                                                                                                                                                                                                                                                                                                                                                                                                                                                                                                                                                                                                                                                                                           |                                                                                                                                                                                                                                                                                                                                                                                                            | scaffold_4_mRNA_328.1              | -                           | -                               |
| GF0029412 | 1                               | 0                        | 0                            | 0 Polynucleotidyl transferase, Ribonuclease H fold (1)           | nucleic acid binding [GO:0003676 molecular_function] (1)                                                                                                                                                                                                                                                                                                                                                                                                                                                                                                                                                                                                                                                                  | Ribonuclease H-like domain [IPR012337] (1)                                                                                                                                                                                                                                                                                                                                                                 | scaffold_4_mRNA_326.1              | -                           | -                               |
| GF0029411 | 1                               | 0                        | 0                            | 0 Hypothetical protein (1)                                       |                                                                                                                                                                                                                                                                                                                                                                                                                                                                                                                                                                                                                                                                                                                           |                                                                                                                                                                                                                                                                                                                                                                                                            | scaffold_4_mRNA_324.1              | -                           | -                               |
| GF0029410 | 1                               | 0                        | 0                            | 0 Hypothetical protein (1)                                       |                                                                                                                                                                                                                                                                                                                                                                                                                                                                                                                                                                                                                                                                                                                           |                                                                                                                                                                                                                                                                                                                                                                                                            | scaffold_4_mRNA_324.1              | -                           | -                               |
| GF0029409 | 1                               | 0                        | 0                            | 0 Retransposon gag protein (1)                                   |                                                                                                                                                                                                                                                                                                                                                                                                                                                                                                                                                                                                                                                                                                                           |                                                                                                                                                                                                                                                                                                                                                                                                            | scaffold_4_mRNA_324.1              | -                           | -                               |
| GF0029408 | 1                               | 0                        | 0                            | 0 N-terminal asparagine amidohydrolase family protein (1)        | protein-N-terminal asparagine amidohydrolase activity [GO:0008418 molecular_function] (1)                                                                                                                                                                                                                                                                                                                                                                                                                                                                                                                                                                                                                                 | Protein N-terminal asparagine amidohydrolase [IPR026750] (1)                                                                                                                                                                                                                                                                                                                                               | scaffold_4_mRNA_323.1              | -                           | -                               |
| GF0029407 | 1                               | 0                        | 0                            | 0 Nucleic acid binding / zinc ion binding protein (1)            |                                                                                                                                                                                                                                                                                                                                                                                                                                                                                                                                                                                                                                                                                                                           | Zinc knuckle CX2CX4HX4C [IPR028536] (1); Domain of unknown function DU-F4283 [IPR025558] (1)                                                                                                                                                                                                                                                                                                               | scaffold_4_mRNA_3217.1             | -                           | -                               |
| GF0029406 | 1                               | 0                        | 0                            | 0 Hypothetical protein (1)                                       |                                                                                                                                                                                                                                                                                                                                                                                                                                                                                                                                                                                                                                                                                                                           |                                                                                                                                                                                                                                                                                                                                                                                                            | scaffold_4_mRNA_321.6              | -                           | -                               |
| GF0029405 | 1                               | 0                        | 0                            | 0 DUF946 family protein (1)                                      |                                                                                                                                                                                                                                                                                                                                                                                                                                                                                                                                                                                                                                                                                                                           | Vacuolar protein sorting-associated protein 62 [IPR009291] (1)                                                                                                                                                                                                                                                                                                                                             | scaffold_4_mRNA_321.5              | -                           | -                               |
| GF0029404 | 1                               | 0                        | 0                            | 0 Hypothetical protein (1)                                       |                                                                                                                                                                                                                                                                                                                                                                                                                                                                                                                                                                                                                                                                                                                           |                                                                                                                                                                                                                                                                                                                                                                                                            | scaffold_4_mRNA_321.2              | -                           | -                               |
| GF0029403 | 1                               | 0                        | 0                            | 0 Hypothetical protein (1)                                       |                                                                                                                                                                                                                                                                                                                                                                                                                                                                                                                                                                                                                                                                                                                           |                                                                                                                                                                                                                                                                                                                                                                                                            | scaffold_4_mRNA_321.0              | -                           | -                               |
| GF0029402 | 1                               | 0                        | 0                            | 0 Ribonuclease H (1)                                             | nucleic acid binding [GO:0003676 molecular_function] (1)                                                                                                                                                                                                                                                                                                                                                                                                                                                                                                                                                                                                                                                                  | TB2/DP1/HVA23-related protein [IPR04345] (1); Ribonuclease H-like domain [IPR012337] (1)                                                                                                                                                                                                                                                                                                                   | scaffold_4_mRNA_320.9              | -                           | -                               |
| GF0029401 | 1                               | 0                        | 0                            | 0 Hypothetical protein (1)                                       | transmembrane transport [GO:0055085 biological_process] (1)                                                                                                                                                                                                                                                                                                                                                                                                                                                                                                                                                                                                                                                               | Oligopeptide transporter, OPT superfamily [IPR004813] (1)                                                                                                                                                                                                                                                                                                                                                  | scaffold_4_mRNA_320.7              | -                           | -                               |
| GF0029400 | 1                               | 0                        | 0                            | 0 Hypothetical protein (1)                                       |                                                                                                                                                                                                                                                                                                                                                                                                                                                                                                                                                                                                                                                                                                                           |                                                                                                                                                                                                                                                                                                                                                                                                            | scaffold_4_mRNA_320.6              | -                           | -                               |
| GF0029399 | 1                               | 0                        | 0                            | 0 Holiday junction resolvase, Six1p, URI domain nuclease (1)     |                                                                                                                                                                                                                                                                                                                                                                                                                                                                                                                                                                                                                                                                                                                           | GIY-YIG nuclease superfamily [IPR000305] (1)                                                                                                                                                                                                                                                                                                                                                               | scaffold_4_mRNA_317.1              | -                           | -                               |
| GF0029398 | 1                               | 0                        | 0                            | 0 Hypothetical protein (1)                                       |                                                                                                                                                                                                                                                                                                                                                                                                                                                                                                                                                                                                                                                                                                                           | Retransposon gag domain [IPR01512] (1)                                                                                                                                                                                                                                                                                                                                                                     | scaffold_4_mRNA_316.0              | -                           | -                               |
| GF0029397 | 1                               | 0                        | 0                            | 0 Carboxypeptidase (1)                                           | serine-type carboxypeptidase activity [GO:0004185 molecular_function] (1); proteolysis [GO:0006508 biological_process] (1)                                                                                                                                                                                                                                                                                                                                                                                                                                                                                                                                                                                                | Serine carboxypeptidase, serine active site [IPR018202] (1); Alpha/Beta hydrolase fold [IPR029058] (1); Peptidase S10, serine carboxypeptidase [IPR001563] (1); Serine carboxypeptidases, histidine active site [IPR031224] (1)                                                                                                                                                                            | scaffold_4_mRNA_315.9              | -                           | -                               |
| GF0029396 | 1                               | 0                        | 0                            | 0 Hypothetical protein (1)                                       | carbohydrate metabolic process [GO:0005975 biological_process] (1); glycerol-3-phosphate metabolic process [GO:0006072 biological_process] (1); glycerol-3-phosphate dehydrogenase complex [GO:0009331 cellular_component] (1); glycerol-3-phosphate dehydrogenase [NAD <sup>+</sup> ] activity [GO:0004367 molecular_function] (1); glycerol-3-phosphate catabolic process [GO:0046168 biological_process] (1); oxidation-reduction process [GO:0055114 biological_process] (1); oxidoreductase activity [GO:0016491 molecular_function] (1); oxidoreductase activity, acting on the CH-OH group of donors, NAD or NADP as acceptor [GO:0016616 molecular_function] (1); NAD binding [GO:0051287 molecular_function] (1) | Glycerol-3-phosphate dehydrogenase, NAD-dependent, N-terminal [IPR01129] (1); Glycerol-3-phosphate dehydrogenase, NAD-dependent [IPR006188] (1); NAD(P) binding domain [IPR016040] (1); Glycerol-3-phosphate dehydrogenase, NAD-dependent, C-terminal [IPR006109] (1); 6-phosphogluconate dehydrogenase C-terminal domain-like [IPR009271] (1); 6-phosphogluconate dehydrogenase, domain 2 [IPR013328] (1) | scaffold_4_mRNA_315.6              | -                           | -                               |
| GF0029394 | 1                               | 0                        | 0                            | 0 Hypothetical protein (1)                                       |                                                                                                                                                                                                                                                                                                                                                                                                                                                                                                                                                                                                                                                                                                                           |                                                                                                                                                                                                                                                                                                                                                                                                            | scaffold_4_mRNA_312.1              | -                           | -                               |
| GF0029393 | 1                               | 0                        | 0                            | 0 BRASSINOSTEROID INSENSITIVE 1-associated receptor kinase 1 (1) |                                                                                                                                                                                                                                                                                                                                                                                                                                                                                                                                                                                                                                                                                                                           | Leucine-rich repeat domain, L domain-like [IPR032675] (1); Leucine-rich repeat-containing N-terminal, plant-type [IPR013210] (1)                                                                                                                                                                                                                                                                           | scaffold_4_mRNA_311.0              | -                           | -                               |
| GF0029392 | 1                               | 0                        | 0                            | 0 Isoleucine N-monooxygenase 2 (1)                               | oxidation-reduction process [GO:0055114 biological_process] (1); oxidoreductase activity, acting on paired donors, with incorporation or reduction of molecular oxygen [GO:0016705 molecular_function] (1); iron ion binding [GO:0005506 molecular_function] (1); heme binding [GO:0020037 molecular_function] (1)                                                                                                                                                                                                                                                                                                                                                                                                        | Cytochrome P450, conserved site [IPR017972] (1); Cytochrome P450, E-class, group 1 [IPR002401] (1); Cytochrome P450 [IPR001128] (1)                                                                                                                                                                                                                                                                        | scaffold_4_mRNA_311.1              | -                           | -                               |
| GF0029391 | 1                               | 0                        | 0                            | 0 RNA-directed DNA polymerase (Reverse transcriptase) (1)        |                                                                                                                                                                                                                                                                                                                                                                                                                                                                                                                                                                                                                                                                                                                           | Reverse transcriptase domain [IPR00477] (1)                                                                                                                                                                                                                                                                                                                                                                | scaffold_4_mRNA_308.1              | -                           | -                               |
| GF0029390 | 1                               | 0                        | 0                            | 0 Hypothetical protein (1)                                       |                                                                                                                                                                                                                                                                                                                                                                                                                                                                                                                                                                                                                                                                                                                           | Glycoyl hydrolase, five-bladed beta-propeller domain [IPR023296] (1) SET domain [IPR001214] (1); Tetratricopeptide repeat-containing domain [IPR013026] (1); Tetratricopeptide repeat [IPR019734] (1); Tetratricopeptide-like helical domain [IPR011990] (1)                                                                                                                                               | scaffold_4_mRNA_303.8              | -                           | -                               |
| GF0029389 | 1                               | 0                        | 0                            | 0 TPR domain containing protein, putative (1)                    | protein binding [GO:0005515 molecular_function] (1)                                                                                                                                                                                                                                                                                                                                                                                                                                                                                                                                                                                                                                                                       |                                                                                                                                                                                                                                                                                                                                                                                                            | scaffold_4_mRNA_303.4              | -                           | -                               |
| GF0029388 | 1                               | 0                        | 0                            | 0 Hypothetical protein (1)                                       |                                                                                                                                                                                                                                                                                                                                                                                                                                                                                                                                                                                                                                                                                                                           |                                                                                                                                                                                                                                                                                                                                                                                                            | scaffold_4_mRNA_301.8              | -                           | -                               |
| GF0029387 | 1                               | 0                        | 0                            | 0 Hypothetical protein (1)                                       |                                                                                                                                                                                                                                                                                                                                                                                                                                                                                                                                                                                                                                                                                                                           |                                                                                                                                                                                                                                                                                                                                                                                                            | scaffold_4_mRNA_3.1                | -                           | -                               |
| GF0029386 | 1                               | 0                        | 0                            | 0 Hypothetical protein (1)                                       |                                                                                                                                                                                                                                                                                                                                                                                                                                                                                                                                                                                                                                                                                                                           |                                                                                                                                                                                                                                                                                                                                                                                                            | scaffold_4_mRNA_295.1              | -                           | -                               |
| GF0029385 | 1                               | 0                        | 0                            | 0 Cytokinin riboside 5'-monophosphate phosphoribohydrolase (1)   |                                                                                                                                                                                                                                                                                                                                                                                                                                                                                                                                                                                                                                                                                                                           | Cytokinin riboside 5'-monophosphate phosphoribohydrolase LOG [IPR005269] (1); LOG family [IPR031100] (1)                                                                                                                                                                                                                                                                                                   | scaffold_4_mRNA_294.1              | -                           | -                               |
| GF0029384 | 1                               | 0                        | 0                            | 0 Hypothetical protein (1)                                       | oxidation-reduction process [GO:0055114 biological_process] (1); oxidoreductase activity, acting on paired donors, with incorporation or reduction of molecular oxygen [GO:0016705 molecular_function] (1); heme binding [GO:0020037 molecular_function] (1); iron ion binding [GO:0005506 molecular_function] (1)                                                                                                                                                                                                                                                                                                                                                                                                        | Cytochrome P450, E-class, group 1 [IPR02401] (1); Reverse transcriptase, RNA-dependent DNA polymerase [IPR011103] (1); Cytochrome P450 [IPR001128] (1)                                                                                                                                                                                                                                                     | scaffold_4_mRNA_293.1              | -                           | -                               |
| GF0029383 | 1                               | 0                        | 0                            | 0 Hypothetical protein (1)                                       | cysteine-type peptidase activity [GO:0008234 molecular_function] (1); proteolysis [GO:0006508 biological_process] (1)                                                                                                                                                                                                                                                                                                                                                                                                                                                                                                                                                                                                     | Ulp1 protease family, C-terminal catalytic domain [IPR003653] (1)                                                                                                                                                                                                                                                                                                                                          | scaffold_4_mRNA_292.1              | -                           | -                               |
| GF0029382 | 1                               | 0                        | 0                            | 0 Hypothetical protein (1)                                       |                                                                                                                                                                                                                                                                                                                                                                                                                                                                                                                                                                                                                                                                                                                           |                                                                                                                                                                                                                                                                                                                                                                                                            | scaffold_4_mRNA_290.6              | -                           | -                               |
| GF0029381 | 1                               | 0                        | 0                            | 0 40S ribosomal protein S26-1 (1)                                | ribosome [GO:0005840 cellular_component] (1); translation [GO:0006412 biological_process] (1); intracellular [GO:0005622 cellular_component] (1); structural constituent of ribosome [GO:0003735 molecular_function] (1)                                                                                                                                                                                                                                                                                                                                                                                                                                                                                                  | Ribosomal protein S26 [IPR000892] (1)                                                                                                                                                                                                                                                                                                                                                                      | scaffold_4_mRNA_290.1              | -                           | -                               |
| GF0029380 | 1                               | 0                        | 0                            | 0 Cytochrome P450 82A4 (1)                                       | oxidation-reduction process [GO:0055114 biological_process] (1); oxidoreductase activity, acting on paired donors, with incorporation or reduction of molecular oxygen [GO:0016705 molecular_function] (1); heme binding [GO:0020037 molecular_function] (1); iron ion binding [GO:0005506 molecular_function] (1)                                                                                                                                                                                                                                                                                                                                                                                                        | Cytochrome P450, E-class, group 1 [IPR02401] (1); Cytochrome P450 [IPR001128] (1)                                                                                                                                                                                                                                                                                                                          | scaffold_4_mRNA_289.1              | -                           | -                               |
| GF0029379 | 1                               | 0                        | 0                            | 0 Hypothetical protein (1)                                       |                                                                                                                                                                                                                                                                                                                                                                                                                                                                                                                                                                                                                                                                                                                           |                                                                                                                                                                                                                                                                                                                                                                                                            | scaffold_4_mRNA_286.1              | -                           | -                               |
| GF0029378 | 1                               | 0                        | 0                            | 0 Putative radical SAM domain-containing protein-like (1)        | RNA methyltransferase activity [GO:0008173 molecular_function] (1); rRNA processing [GO:0006364 biological_process] (1); cytoplasm [GO:0005737 cellular_component] (1)                                                                                                                                                                                                                                                                                                                                                                                                                                                                                                                                                    | Ribosomal RNA large subunit methyltransferase RlnN/Cfr [IPR004383] (1)                                                                                                                                                                                                                                                                                                                                     | scaffold_4_mRNA_284.1              | -                           | -                               |

| ID        | Num. in <i>C. clementinae</i> | Num. in <i>C. uchiha</i> | Num. in <i>P. trifoliata</i> | Note                                                                   | GO                                                                                                                                                                                                                                                                                                                                                                                                                                                                                                                                                                                                                                                                                     | InterPro                                                                                                                                                                                                                                                                                                                                                                                                 | Members in <i>C. clementinae</i> | Members in <i>C. uchiha</i> | Members in <i>P. trifoliata</i> |
|-----------|-------------------------------|--------------------------|------------------------------|------------------------------------------------------------------------|----------------------------------------------------------------------------------------------------------------------------------------------------------------------------------------------------------------------------------------------------------------------------------------------------------------------------------------------------------------------------------------------------------------------------------------------------------------------------------------------------------------------------------------------------------------------------------------------------------------------------------------------------------------------------------------|----------------------------------------------------------------------------------------------------------------------------------------------------------------------------------------------------------------------------------------------------------------------------------------------------------------------------------------------------------------------------------------------------------|----------------------------------|-----------------------------|---------------------------------|
| GF0029377 | 1                             | 0                        | 0                            | 0 Hexosyltransferase (1)                                               | galactose metabolic process [GO:0006012 biological_process] (1);<br>transferase activity, transferring glycosyl groups [GO:0016757 molecular_function] (1); inositol 3-alpha-galactosyltransferase activity [GO:0047216 molecular_function] (1)                                                                                                                                                                                                                                                                                                                                                                                                                                        | Galactinol synthase [IPR030515] (1);<br>Nucleotide-diphospho-sugar transferases [IPR020441] (1); Glycosyl transferase, family 8 [IPR002495] (1)                                                                                                                                                                                                                                                          | scaffold_4_mRNA_2825.1           | -                           | -                               |
| GF0029376 | 1                             | 0                        | 0                            | 0 Hypothetical protein (1)                                             |                                                                                                                                                                                                                                                                                                                                                                                                                                                                                                                                                                                                                                                                                        |                                                                                                                                                                                                                                                                                                                                                                                                          | scaffold_4_mRNA_2824.1           | -                           | -                               |
| GF0029375 | 1                             | 0                        | 0                            | 0 Hypothetical protein (1)                                             |                                                                                                                                                                                                                                                                                                                                                                                                                                                                                                                                                                                                                                                                                        |                                                                                                                                                                                                                                                                                                                                                                                                          | scaffold_4_mRNA_2807.1           | -                           | -                               |
| GF0029374 | 1                             | 0                        | 0                            | 0 Hypothetical protein (1)                                             |                                                                                                                                                                                                                                                                                                                                                                                                                                                                                                                                                                                                                                                                                        |                                                                                                                                                                                                                                                                                                                                                                                                          | scaffold_4_mRNA_2786.1           | -                           | -                               |
| GF0029373 | 1                             | 0                        | 0                            | 0 Hypothetical protein (1)                                             |                                                                                                                                                                                                                                                                                                                                                                                                                                                                                                                                                                                                                                                                                        |                                                                                                                                                                                                                                                                                                                                                                                                          | scaffold_4_mRNA_2775.1           | -                           | -                               |
| GF0029372 | 1                             | 0                        | 0                            | 0 Hypothetical protein (1)                                             |                                                                                                                                                                                                                                                                                                                                                                                                                                                                                                                                                                                                                                                                                        |                                                                                                                                                                                                                                                                                                                                                                                                          | scaffold_4_mRNA_2746.1           | -                           | -                               |
| GF0029371 | 1                             | 0                        | 0                            | 0 Histone H2B (1)                                                      | protein heterodimerization activity [GO:0046982 molecular_function] (1);<br>DNA binding [GO:0003677 molecular_function] (1); nucleosome [GO:0000786 cellular_component] (1)                                                                                                                                                                                                                                                                                                                                                                                                                                                                                                            | Histone-fold [IPR009072] (1); Histone H2B [IPR000558] (1)                                                                                                                                                                                                                                                                                                                                                | scaffold_4_mRNA_2740.1           | -                           | -                               |
| GF0029370 | 1                             | 0                        | 0                            | 0 Xylem cysteine peptidase 1 (1)                                       | cysteine-type peptidase activity [GO:0008234 molecular_function] (1);<br>proteolysis [GO:0006508 biological_process] (1)                                                                                                                                                                                                                                                                                                                                                                                                                                                                                                                                                               | Cysteine peptidase, cysteine active site [IPR00169] (1); Peptidase C1A [IPR013128] (1); Calpain propeptide inhibitor domain (I29) [IPR013201] (1);<br>Peptidase C1A, papain C-terminal [IPR00668] (1)                                                                                                                                                                                                    | scaffold_4_mRNA_2730.1           | -                           | -                               |
| GF0029369 | 1                             | 0                        | 0                            | 0 Hypothetical protein (1)                                             |                                                                                                                                                                                                                                                                                                                                                                                                                                                                                                                                                                                                                                                                                        |                                                                                                                                                                                                                                                                                                                                                                                                          | scaffold_4_mRNA_2725.1           | -                           | -                               |
| GF0029368 | 1                             | 0                        | 0                            | 0 Hypothetical protein (1)                                             |                                                                                                                                                                                                                                                                                                                                                                                                                                                                                                                                                                                                                                                                                        |                                                                                                                                                                                                                                                                                                                                                                                                          | scaffold_4_mRNA_2723.1           | -                           | -                               |
| GF0029367 | 1                             | 0                        | 0                            | 0 Protein SUR2 , putative (1)                                          | oxidoreductase activity [GO:0016491 molecular_function] (1); oxidation-reduction process [GO:0055114 biological_process] (1); lipid biosynthetic process [GO:0008610 biological_process] (1); iron ion binding [GO:0005506 molecular_function] (1)                                                                                                                                                                                                                                                                                                                                                                                                                                     | Fatty acid hydroxylase [IPR006694] (1)                                                                                                                                                                                                                                                                                                                                                                   | scaffold_4_mRNA_2719.1           | -                           | -                               |
| GF0029366 | 1                             | 0                        | 0                            | 0 DNA-binding stoorekeeper protein-related (1)                         | integral component of membrane [GO:0016021 cellular_component] (1)                                                                                                                                                                                                                                                                                                                                                                                                                                                                                                                                                                                                                     | TRAM/LAG1/CLN8 homology domain [IPR006634] (1)                                                                                                                                                                                                                                                                                                                                                           | scaffold_4_mRNA_2683.1           | -                           | -                               |
| GF0029365 | 1                             | 0                        | 0                            | 0 Hypothetical protein (1)                                             |                                                                                                                                                                                                                                                                                                                                                                                                                                                                                                                                                                                                                                                                                        |                                                                                                                                                                                                                                                                                                                                                                                                          | scaffold_4_mRNA_2664.1           | -                           | -                               |
| GF0029364 | 1                             | 0                        | 0                            | 0 Hypothetical protein (1)                                             |                                                                                                                                                                                                                                                                                                                                                                                                                                                                                                                                                                                                                                                                                        |                                                                                                                                                                                                                                                                                                                                                                                                          | scaffold_4_mRNA_2653.1           | -                           | -                               |
| GF0029363 | 1                             | 0                        | 0                            | 0 Hypothetical protein (1)                                             |                                                                                                                                                                                                                                                                                                                                                                                                                                                                                                                                                                                                                                                                                        |                                                                                                                                                                                                                                                                                                                                                                                                          | scaffold_4_mRNA_2631.1           | -                           | -                               |
| GF0029362 | 1                             | 0                        | 0                            | 0 Hypothetical protein (1)                                             | nucleic acid binding [GO:0003676 molecular_function] (1)                                                                                                                                                                                                                                                                                                                                                                                                                                                                                                                                                                                                                               | TB2/DPI1/HVA22-related protein [IPR04345] (1); Ribonuclease H-like domain [IPR012337] (1)                                                                                                                                                                                                                                                                                                                | scaffold_4_mRNA_2625.1           | -                           | -                               |
| GF0029361 | 1                             | 0                        | 0                            | 0 Hypothetical protein (1)                                             | cysteine-type peptidase activity [GO:0008234 molecular_function] (1);<br>proteolysis [GO:0006508 biological_process] (1)                                                                                                                                                                                                                                                                                                                                                                                                                                                                                                                                                               | Domain of unknown function DUF1985 [IPR015410] (1); Upl1 protease family, C-terminal catalytic domain [IPR003653] (1)                                                                                                                                                                                                                                                                                    | scaffold_4_mRNA_2615.1           | -                           | -                               |
| GF0029360 | 1                             | 0                        | 0                            | 0 Hypothetical protein (1)                                             | RNA polymerase II regulatory region sequence-specific DNA binding [GO:0009977 molecular_function] (1);<br>nucleus [GO:0005834 cellular_component] (1); DNA binding [GO:0003677 molecular_function] (1);<br>protein dimerization activity [GO:0046983 molecular_function] (1);<br>transcription factor activity, sequence-specific DNA binding [GO:0003700 molecular_function] (1); zinc ion binding [GO:0008270 molecular_function] (1);<br>MAPK cascade [GO:0000165 biological_process] (1); positive regulation of transcription from RNA polymerase II promoter [GO:0045944 biological_process] (1); regulation of transcription, DNA-templated [GO:0006355 biological_process] (1) | MADS MEF2-like [IPR033896] (1);<br>Transcription factor, K-box [IPR002487] (1);<br>Zinc finger, PMZ-type [IPR006564] (1);<br>MULE transposase domain [IPR018289] (1);<br>Transposase, MuDR plant [IPR00432] (1);<br>Zinc finger, SWIM-type [IPR007527] (1);<br>Transcription factor, MADS-box [IPR02100] (1)                                                                                             | scaffold_4_mRNA_2614.1           | -                           | -                               |
| GF0029359 | 1                             | 0                        | 0                            | 0 Hypothetical protein (1)                                             |                                                                                                                                                                                                                                                                                                                                                                                                                                                                                                                                                                                                                                                                                        |                                                                                                                                                                                                                                                                                                                                                                                                          | scaffold_4_mRNA_2578.1           | -                           | -                               |
| GF0029358 | 1                             | 0                        | 0                            | 0 Hypothetical protein (1)                                             |                                                                                                                                                                                                                                                                                                                                                                                                                                                                                                                                                                                                                                                                                        | Retrotransposon gag domain [IPR005162] (1)                                                                                                                                                                                                                                                                                                                                                               | scaffold_4_mRNA_2577.1           | -                           | -                               |
| GF0029357 | 1                             | 0                        | 0                            | 0 Hypothetical protein (1)                                             |                                                                                                                                                                                                                                                                                                                                                                                                                                                                                                                                                                                                                                                                                        |                                                                                                                                                                                                                                                                                                                                                                                                          | scaffold_4_mRNA_2576.1           | -                           | -                               |
| GF0029356 | 1                             | 0                        | 0                            | 0 Hypothetical protein (1)                                             |                                                                                                                                                                                                                                                                                                                                                                                                                                                                                                                                                                                                                                                                                        |                                                                                                                                                                                                                                                                                                                                                                                                          | scaffold_4_mRNA_2575.1           | -                           | -                               |
| GF0029355 | 1                             | 0                        | 0                            | 0 Hypothetical protein (1)                                             |                                                                                                                                                                                                                                                                                                                                                                                                                                                                                                                                                                                                                                                                                        |                                                                                                                                                                                                                                                                                                                                                                                                          | scaffold_4_mRNA_2574.1           | -                           | -                               |
| GF0029354 | 1                             | 0                        | 0                            | 0 Hypothetical protein (1)                                             |                                                                                                                                                                                                                                                                                                                                                                                                                                                                                                                                                                                                                                                                                        |                                                                                                                                                                                                                                                                                                                                                                                                          | scaffold_4_mRNA_2573.1           | -                           | -                               |
| GF0029353 | 1                             | 0                        | 0                            | 0 Hypothetical protein (1)                                             |                                                                                                                                                                                                                                                                                                                                                                                                                                                                                                                                                                                                                                                                                        |                                                                                                                                                                                                                                                                                                                                                                                                          | scaffold_4_mRNA_2571.1           | -                           | -                               |
| GF0029352 | 1                             | 0                        | 0                            | 0 Hypothetical protein (1)                                             |                                                                                                                                                                                                                                                                                                                                                                                                                                                                                                                                                                                                                                                                                        |                                                                                                                                                                                                                                                                                                                                                                                                          | scaffold_4_mRNA_2565.1           | -                           | -                               |
| GF0029351 | 1                             | 0                        | 0                            | 0 Retrotransposon protein, putative, Ty3-gypsy subclass, expressed (1) |                                                                                                                                                                                                                                                                                                                                                                                                                                                                                                                                                                                                                                                                                        | Aspartic peptidase domain [IPR021109] (1)                                                                                                                                                                                                                                                                                                                                                                | scaffold_4_mRNA_2564.1           | -                           | -                               |
| GF0029350 | 1                             | 0                        | 0                            | 0 Hypothetical protein (1)                                             |                                                                                                                                                                                                                                                                                                                                                                                                                                                                                                                                                                                                                                                                                        | Retrotransposon gag domain [IPR005162] (1)                                                                                                                                                                                                                                                                                                                                                               | scaffold_4_mRNA_2563.1           | -                           | -                               |
| GF0029349 | 1                             | 0                        | 0                            | 0 Hypothetical protein (1)                                             |                                                                                                                                                                                                                                                                                                                                                                                                                                                                                                                                                                                                                                                                                        |                                                                                                                                                                                                                                                                                                                                                                                                          | scaffold_4_mRNA_2555.1           | -                           | -                               |
| GF0029348 | 1                             | 0                        | 0                            | 0 PLC-like phosphodiesterase superfamily protein (1)                   | phosphoric diester hydrolase activity [GO:0008081 molecular_function] (1);<br>lipid metabolic process [GO:0006629 biological_process] (1);<br>protein kinase activity [GO:0004672 molecular_function] (1);<br>protein phosphorylation [GO:0006468 biological_process] (1); ATP binding [GO:000524 molecular_function] (1)                                                                                                                                                                                                                                                                                                                                                              | PLC-like phosphodiesterase, TIM beta/alpha-barrel domain [IPR017946] (1);<br>Protein kinase-like domain [IPR011009] (1);<br>Protein kinase domain [IPR000719] (1);<br>Serine/threonine-protein kinase, active site [IPR008271] (1)                                                                                                                                                                       | scaffold_4_mRNA_2533.1           | -                           | -                               |
| GF0029347 | 1                             | 0                        | 0                            | 0 Hypothetical protein (1)                                             |                                                                                                                                                                                                                                                                                                                                                                                                                                                                                                                                                                                                                                                                                        |                                                                                                                                                                                                                                                                                                                                                                                                          | scaffold_4_mRNA_2519.1           | -                           | -                               |
| GF0029346 | 1                             | 0                        | 0                            | 0 Hypothetical protein (1)                                             | oxidation-reduction process [GO:0055114 biological_process] (1);<br>oxidoreductase activity, acting on paired donors, with incorporation or reduction of molecular oxygen [GO:0016705 molecular_function] (1); heme binding [GO:0026037 molecular_function] (1);<br>zinc ion binding [GO:0005506 molecular_function] (1)                                                                                                                                                                                                                                                                                                                                                               | Cytochrome P450, conserved site [IPR01792] (1);<br>Cytochrome P450, E-class, group 1 [IPR002401] (1);<br>Cytochrome P450 [IPR001128] (1)                                                                                                                                                                                                                                                                 | scaffold_4_mRNA_2517.1           | -                           | -                               |
| GF0029345 | 1                             | 0                        | 0                            | 0 Putative non-LTR retroelement reverse transcriptase (1)              | RNA-DNA hybrid ribonuclease activity [GO:0004523 molecular_function] (1);<br>zinc ion binding [GO:0008270 molecular_function] (1);<br>nucleic acid binding [GO:0003676 molecular_function] (1)                                                                                                                                                                                                                                                                                                                                                                                                                                                                                         | Reverse transcriptase domain [IPR000477] (1);<br>Domain of unknown function DUF283 [IPR025558] (1);<br>Ribonuclease H-like domain [IPR012337] (1);<br>Reverse transcriptase zinc-binding domain [IPR026960] (1);<br>Ribonuclease H domain [IPR001360] (1);<br>Zinc finger, CCHC-type [IPR001878] (1);<br>Zinc knuckle CX2CX4HX4C [IPR02536] (1);<br>Endonuclease/exonuclease/phosphatase [IPR005135] (1) | scaffold_4_mRNA_2512.1           | -                           | -                               |
| GF0029344 | 1                             | 0                        | 0                            | 0 Lipid transfer protein 2 (1)                                         | lipid transport [GO:0006869 biological_process] (1); lipid binding [GO:0008289 molecular_function] (1)                                                                                                                                                                                                                                                                                                                                                                                                                                                                                                                                                                                 | Plant lipid transfer protein/Par allergen [IPR00528] (1);<br>Bifunctional inhibitor/plant lipid transfer protein/seed storage helical domain [IPR016140] (1)                                                                                                                                                                                                                                             | scaffold_4_mRNA_2487.1           | -                           | -                               |
| GF0029343 | 1                             | 0                        | 0                            | 0 Hypothetical protein (1)                                             |                                                                                                                                                                                                                                                                                                                                                                                                                                                                                                                                                                                                                                                                                        |                                                                                                                                                                                                                                                                                                                                                                                                          | scaffold_4_mRNA_2486.1           | -                           | -                               |
| GF0029342 | 1                             | 0                        | 0                            | 0 Hypothetical protein (1)                                             |                                                                                                                                                                                                                                                                                                                                                                                                                                                                                                                                                                                                                                                                                        |                                                                                                                                                                                                                                                                                                                                                                                                          | scaffold_4_mRNA_2483.1           | -                           | -                               |
| GF0029341 | 1                             | 0                        | 0                            | 0 Verticillium wilt resistance-like protein (1)                        | cysteine-type peptidase activity [GO:0008234 molecular_function] (1);<br>protein binding [GO:0005515 molecular_function] (1);<br>proteolysis [GO:0006508 biological_process] (1)                                                                                                                                                                                                                                                                                                                                                                                                                                                                                                       | Upl1 protease family, C-terminal catalytic domain [IPR003653] (1);<br>Leucine-rich repeat [IPR01041] (1);<br>Leucine-rich repeat, typical subtype [IPR003591] (1);<br>Leucine-rich repeat domain, L domain-like [IPR032675] (1)                                                                                                                                                                          | scaffold_4_mRNA_2477.1           | -                           | -                               |
| GF0029340 | 1                             | 0                        | 0                            | 0 Hypothetical protein (1)                                             |                                                                                                                                                                                                                                                                                                                                                                                                                                                                                                                                                                                                                                                                                        |                                                                                                                                                                                                                                                                                                                                                                                                          | scaffold_4_mRNA_2465.1           | -                           | -                               |
| GF0029339 | 1                             | 0                        | 0                            | 0 Monosaccharide transport protein (1)                                 |                                                                                                                                                                                                                                                                                                                                                                                                                                                                                                                                                                                                                                                                                        |                                                                                                                                                                                                                                                                                                                                                                                                          | scaffold_4_mRNA_2440.1           | -                           | -                               |
| GF0029338 | 1                             | 0                        | 0                            | 0 Putative non-LTR retroelement reverse transcriptase (1)              | nucleic acid binding [GO:0003676 molecular_function] (1);<br>RNA-DNA hybrid ribonuclease activity [GO:0004523 molecular_function] (1)                                                                                                                                                                                                                                                                                                                                                                                                                                                                                                                                                  | TB2/DPI1/HVA22-related protein [IPR04345] (1);<br>Endonuclease/exonuclease/phosphatase [IPR005135] (1);<br>Ribonuclease H-like domain [IPR012337] (1);<br>Ribonuclease H domain [IPR002156] (1)                                                                                                                                                                                                          | scaffold_4_mRNA_2433.1           | -                           | -                               |
| GF0029337 | 1                             | 0                        | 0                            | 0 Hypothetical protein (1)                                             |                                                                                                                                                                                                                                                                                                                                                                                                                                                                                                                                                                                                                                                                                        |                                                                                                                                                                                                                                                                                                                                                                                                          | scaffold_4_mRNA_2425.1           | -                           | -                               |
| GF0029336 | 1                             | 0                        | 0                            | 0 Hypothetical protein (1)                                             | regulation of transcription, DNA-templated [GO:0006355 biological_process] (1)                                                                                                                                                                                                                                                                                                                                                                                                                                                                                                                                                                                                         | FHY3/FAR1 family [IPR031052] (1);<br>FAR1 DNA binding domain [IPR004330] (1)                                                                                                                                                                                                                                                                                                                             | scaffold_4_mRNA_2400.1           | -                           | -                               |
| GF0029335 | 1                             | 0                        | 0                            | 0 Hypothetical protein (1)                                             |                                                                                                                                                                                                                                                                                                                                                                                                                                                                                                                                                                                                                                                                                        |                                                                                                                                                                                                                                                                                                                                                                                                          | scaffold_4_mRNA_2397.1           | -                           | -                               |
| GF0029334 | 1                             | 0                        | 0                            | 0 Putative retroelement pol polyprotein (1)                            |                                                                                                                                                                                                                                                                                                                                                                                                                                                                                                                                                                                                                                                                                        |                                                                                                                                                                                                                                                                                                                                                                                                          | scaffold_4_mRNA_2396.1           | -                           | -                               |
| GF0029333 | 1                             | 0                        | 0                            | 0 3-ketoacyl-CoA synthase 6 (1)                                        | catalytic activity [GO:0003824 molecular_function] (1); fatty acid biosynthetic process [GO:0006033 biological_process] (1);<br>transferase activity, transferring acyl groups other than amino-acyl groups [GO:0016747 molecular_function] (1);<br>membrane [GO:0016020 cellular_component] (1);<br>metabolic process [GO:0008152 biological_process] (1)                                                                                                                                                                                                                                                                                                                             | Thiolase-like [IPR01609] (1);<br>Very-long-chain 3-ketoacyl-CoA synthase [IPR012392] (1);<br>FAEI Type III polyketide synthase-like protein [IPR013601] (1);<br>3-Oxoacyl-[acyl-carrier-protein (ACP)] synthase III, C-terminal [IPR013747] (1)                                                                                                                                                          | scaffold_4_mRNA_2376.1           | -                           | -                               |



| ID        | Num. in <i>C. celerans</i> | Num. in <i>C. uchiha</i> | Num. in <i>P. trifoliata</i> | Note                                                                   | GO                                                                                                                                                                                                                                                                                                                                                                                                                                                                                                       | InterPro                                                                                                                                                                                                                                                                                                          | Members in <i>C. celerans</i> | Members in <i>C. uchiha</i> | Members in <i>P. trifoliata</i> |
|-----------|----------------------------|--------------------------|------------------------------|------------------------------------------------------------------------|----------------------------------------------------------------------------------------------------------------------------------------------------------------------------------------------------------------------------------------------------------------------------------------------------------------------------------------------------------------------------------------------------------------------------------------------------------------------------------------------------------|-------------------------------------------------------------------------------------------------------------------------------------------------------------------------------------------------------------------------------------------------------------------------------------------------------------------|-------------------------------|-----------------------------|---------------------------------|
| GF0029332 | 1                          | 0                        | 0                            | 0 Hypothetical protein (1)                                             |                                                                                                                                                                                                                                                                                                                                                                                                                                                                                                          | Transposase, Top1/En-Spm-like [IPR04284] (1)                                                                                                                                                                                                                                                                      | scaffold_4_mRNA_2372.1        | -                           | -                               |
| GF0029331 | 1                          | 0                        | 0                            | 0 Hypothetical protein (1)                                             |                                                                                                                                                                                                                                                                                                                                                                                                                                                                                                          | Domain of unknown function DUF4283 [IPR025558] (1)                                                                                                                                                                                                                                                                | scaffold_4_mRNA_2364.1        | -                           | -                               |
| GF0029330 | 1                          | 0                        | 0                            | 0 Hypothetical protein (1)                                             |                                                                                                                                                                                                                                                                                                                                                                                                                                                                                                          |                                                                                                                                                                                                                                                                                                                   | scaffold_4_mRNA_2363.1        | -                           | -                               |
| GF0029329 | 1                          | 0                        | 0                            | 0 Hypothetical protein (1)                                             |                                                                                                                                                                                                                                                                                                                                                                                                                                                                                                          |                                                                                                                                                                                                                                                                                                                   | scaffold_4_mRNA_2357.1        | -                           | -                               |
| GF0029328 | 1                          | 0                        | 0                            | 0 Hypothetical protein (1)                                             |                                                                                                                                                                                                                                                                                                                                                                                                                                                                                                          | Bifunctional inhibitor/plast lipid transfer protein/acid storage helical domain [IPR016140] (1)                                                                                                                                                                                                                   | scaffold_4_mRNA_2323.1        | -                           | -                               |
| GF0029327 | 1                          | 0                        | 0                            | 0 Hypothetical protein (1)                                             |                                                                                                                                                                                                                                                                                                                                                                                                                                                                                                          |                                                                                                                                                                                                                                                                                                                   | scaffold_4_mRNA_2291.1        | -                           | -                               |
| GF0029326 | 1                          | 0                        | 0                            | 0 LRR receptor-like kinase family protein (1)                          | ATP binding [GO:0005524 molecular_function] (1); protein kinase activity [GO:0004672 molecular_function] (1); protein phosphorylation [GO:0006468 biological_process] (1); protein binding [GO:0005515 molecular_function] (1)                                                                                                                                                                                                                                                                           | Serine-threonine/tyrosine-protein kinase, catalytic domain [IPR001245] (1); Leucine-rich repeat [IPR001613] (1); Protein kinase domain [IPR000719] (1); Leucine-rich repeat, typical subtype [IPR03591] (1); Leucine-rich repeat domain, L domain-like [IPR02675] (1); Protein kinase-like domain [IPR011009] (1) | scaffold_4_mRNA_2289.1        | -                           | -                               |
| GF0029325 | 1                          | 0                        | 0                            | 0 Monosaccharide transport protein (1)                                 | protein kinase activity [GO:0004672 molecular_function] (1); protein phosphorylation [GO:0006468 biological_process] (1); ATP binding [GO:0005524 molecular_function] (1)                                                                                                                                                                                                                                                                                                                                | Protein kinase domain [IPR000719] (1); Protein kinase-like domain [IPR011009] (1); Serine-threonine/tyrosine-protein kinase, catalytic domain [IPR001245] (1)                                                                                                                                                     | scaffold_4_mRNA_2288.1        | -                           | -                               |
| GF0029324 | 1                          | 0                        | 0                            | 0 Retrotransposon protein, putative, Ty3-gypsy subclass, expressed (1) |                                                                                                                                                                                                                                                                                                                                                                                                                                                                                                          | Aspartic peptidase domain [IPR021109] (1)                                                                                                                                                                                                                                                                         | scaffold_4_mRNA_2287.1        | -                           | -                               |
| GF0029323 | 1                          | 0                        | 0                            | 0 Glutathione transferase (1)                                          | protein binding [GO:0005515 molecular_function] (1)                                                                                                                                                                                                                                                                                                                                                                                                                                                      | Thioredoxin-like fold [IPR012336] (1); Glutathione S-transferase, N-terminal [IPR004045] (1); Glutathione S-transferase, C-terminal-like [IPR010987] (1)                                                                                                                                                          | scaffold_4_mRNA_2285.1        | -                           | -                               |
| GF0029322 | 1                          | 0                        | 0                            | 0 Protein prenyltransferase superfamily protein (1)                    | protein binding [GO:0005515 molecular_function] (1)                                                                                                                                                                                                                                                                                                                                                                                                                                                      | Tetratricopeptide repeat [IPR019734] (1); Tetratricopeptide repeat-containing domain [IPR013026] (1); Tetratricopeptide-like helical domain [IPR011990] (1); Tetratricopeptide repeat 2 [IPR013105] (1)                                                                                                           | scaffold_4_mRNA_2281.1        | -                           | -                               |
| GF0029321 | 1                          | 0                        | 0                            | 0 Hypothetical protein (1)                                             | ATP binding [GO:0005524 molecular_function] (1); protein kinase activity [GO:0004672 molecular_function] (1); protein phosphorylation [GO:0006468 biological_process] (1)                                                                                                                                                                                                                                                                                                                                | Serine-threonine/tyrosine-protein kinase, catalytic domain [IPR001245] (1); Serine-threonine-protein kinase, active site [IPR008271] (1); Gag-polyprotein of LTR copia-type [IPR029472] (1); Protein kinase domain [IPR000719] (1); Protein kinase-like domain [IPR011009] (1)                                    | scaffold_4_mRNA_2280.1        | -                           | -                               |
| GF0029320 | 1                          | 0                        | 0                            | 0 Glutathione transferase (1)                                          | protein binding [GO:0005515 molecular_function] (1)                                                                                                                                                                                                                                                                                                                                                                                                                                                      | Thioredoxin-like fold [IPR012336] (1); Glutathione S-transferase, C-terminal-like [IPR010987] (1); Glutathione S-transferase, N-terminal [IPR004045] (1)                                                                                                                                                          | scaffold_4_mRNA_2279.1        | -                           | -                               |
| GF0029319 | 1                          | 0                        | 0                            | 0 Tetratricopeptide repeat protein 27-like protein (1)                 | protein binding [GO:0005515 molecular_function] (1)                                                                                                                                                                                                                                                                                                                                                                                                                                                      | Tetratricopeptide-like helical domain [IPR011990] (1); Tetratricopeptide repeat 2 [IPR013105] (1); Tetratricopeptide repeat [IPR019734] (1); Tetratricopeptide repeat-containing domain [IPR013026] (1)                                                                                                           | scaffold_4_mRNA_2278.1        | -                           | -                               |
| GF0029318 | 1                          | 0                        | 0                            | 0 Glutathione transferase (1)                                          | protein binding [GO:0005515 molecular_function] (1)                                                                                                                                                                                                                                                                                                                                                                                                                                                      | Glutathione S-transferase, N-terminal [IPR004045] (1); Glutathione S-transferase, C-terminal-like [IPR010987] (1); Thioredoxin-like fold [IPR012336] (1); Glutathione S-transferase, C-terminal [IPR004046] (1)                                                                                                   | scaffold_4_mRNA_2275.1        | -                           | -                               |
| GF0029317 | 1                          | 0                        | 0                            | 0 Hypothetical protein (1)                                             |                                                                                                                                                                                                                                                                                                                                                                                                                                                                                                          |                                                                                                                                                                                                                                                                                                                   | scaffold_4_mRNA_2272.1        | -                           | -                               |
| GF0029316 | 1                          | 0                        | 0                            | 0 Hypothetical protein (1)                                             | regulation of transcription, DNA-templated [GO:0006355 biological_process] (1)                                                                                                                                                                                                                                                                                                                                                                                                                           | MULE transposase domain [IPR018289] (1); FHY3/FAR1 family [IPR031052] (1)                                                                                                                                                                                                                                         | scaffold_4_mRNA_2270.1        | -                           | -                               |
| GF0029315 | 1                          | 0                        | 0                            | 0 Hypothetical protein (1)                                             |                                                                                                                                                                                                                                                                                                                                                                                                                                                                                                          |                                                                                                                                                                                                                                                                                                                   | scaffold_4_mRNA_2269.1        | -                           | -                               |
| GF0029314 | 1                          | 0                        | 0                            | 0 DUF177 domain protein (1)                                            |                                                                                                                                                                                                                                                                                                                                                                                                                                                                                                          |                                                                                                                                                                                                                                                                                                                   | scaffold_4_mRNA_2263.1        | -                           | -                               |
| GF0029313 | 1                          | 0                        | 0                            | 0 Hypothetical protein (1)                                             |                                                                                                                                                                                                                                                                                                                                                                                                                                                                                                          |                                                                                                                                                                                                                                                                                                                   | scaffold_4_mRNA_2255.1        | -                           | -                               |
| GF0029312 | 1                          | 0                        | 0                            | 0 Hypothetical protein (1)                                             |                                                                                                                                                                                                                                                                                                                                                                                                                                                                                                          |                                                                                                                                                                                                                                                                                                                   | scaffold_4_mRNA_2254.1        | -                           | -                               |
| GF0029311 | 1                          | 0                        | 0                            | 0 Hypothetical protein (1)                                             |                                                                                                                                                                                                                                                                                                                                                                                                                                                                                                          |                                                                                                                                                                                                                                                                                                                   | scaffold_4_mRNA_2242.1        | -                           | -                               |
| GF0029310 | 1                          | 0                        | 0                            | 0 Hypothetical protein (1)                                             | proteolysis [GO:0006508 biological_process] (1); aspartic-type endopeptidase activity [GO:0004190 molecular_function] (1)                                                                                                                                                                                                                                                                                                                                                                                | Aspartic peptidase, active site [IPR01969] (1); Aspartic peptidase domain [IPR021109] (1)                                                                                                                                                                                                                         | scaffold_4_mRNA_2235.1        | -                           | -                               |
| GF0029309 | 1                          | 0                        | 0                            | 0 Hypothetical protein (1)                                             |                                                                                                                                                                                                                                                                                                                                                                                                                                                                                                          |                                                                                                                                                                                                                                                                                                                   | scaffold_4_mRNA_2228.1        | -                           | -                               |
| GF0029308 | 1                          | 0                        | 0                            | 0 Hypothetical protein (1)                                             |                                                                                                                                                                                                                                                                                                                                                                                                                                                                                                          |                                                                                                                                                                                                                                                                                                                   | scaffold_4_mRNA_2218.1        | -                           | -                               |
| GF0029307 | 1                          | 0                        | 0                            | 0 Hypothetical protein (1)                                             |                                                                                                                                                                                                                                                                                                                                                                                                                                                                                                          |                                                                                                                                                                                                                                                                                                                   | scaffold_4_mRNA_2217.1        | -                           | -                               |
| GF0029306 | 1                          | 0                        | 0                            | 0 Hypothetical protein (1)                                             |                                                                                                                                                                                                                                                                                                                                                                                                                                                                                                          |                                                                                                                                                                                                                                                                                                                   | scaffold_4_mRNA_2215.1        | -                           | -                               |
| GF0029305 | 1                          | 0                        | 0                            | 0 Hypothetical protein (1)                                             | proton-transporting ATPase activity, rotational mechanism [GO:0046961 molecular_function] (1); vacuolar proton-transporting V-type ATPase, V1 domain [GO:0000221 cellular_component] (1); heme binding [GO:0020037 molecular_function] (1); binding [GO:0005488 molecular_function] (1); ATP hydrolysis coupled proton transport [GO:0015991 biological_process] (1); hydrolase activity, acting on acid anhydrides, catalyzing transmembrane movement of substances [GO:0016820 molecular_function] (1) | ATPase, V1 complex, subunit H [IPR004908] (1); ATPase, V1 complex, subunit H, C-terminal [IPR01987] (1); Cytochrome b5, heme-binding site [IPR018506] (1); Armadillo-type fold [IPR016024] (1)                                                                                                                    | scaffold_4_mRNA_2198.1        | -                           | -                               |
| GF0029304 | 1                          | 0                        | 0                            | 0 Hypothetical protein (1)                                             |                                                                                                                                                                                                                                                                                                                                                                                                                                                                                                          |                                                                                                                                                                                                                                                                                                                   | scaffold_4_mRNA_2184.1        | -                           | -                               |
| GF0029303 | 1                          | 0                        | 0                            | 0 Hypothetical protein (1)                                             |                                                                                                                                                                                                                                                                                                                                                                                                                                                                                                          |                                                                                                                                                                                                                                                                                                                   | scaffold_4_mRNA_2183.1        | -                           | -                               |
| GF0029302 | 1                          | 0                        | 0                            | 0 Hypothetical protein (1)                                             |                                                                                                                                                                                                                                                                                                                                                                                                                                                                                                          |                                                                                                                                                                                                                                                                                                                   | scaffold_4_mRNA_2173.1        | -                           | -                               |
| GF0029301 | 1                          | 0                        | 0                            | 0 Hypothetical protein (1)                                             |                                                                                                                                                                                                                                                                                                                                                                                                                                                                                                          |                                                                                                                                                                                                                                                                                                                   | scaffold_4_mRNA_2166.1        | -                           | -                               |
| GF0029300 | 1                          | 0                        | 0                            | 0 Hypothetical protein (1)                                             |                                                                                                                                                                                                                                                                                                                                                                                                                                                                                                          |                                                                                                                                                                                                                                                                                                                   | scaffold_4_mRNA_2148.1        | -                           | -                               |
| GF0029299 | 1                          | 0                        | 0                            | 0 Hypothetical protein (1)                                             |                                                                                                                                                                                                                                                                                                                                                                                                                                                                                                          |                                                                                                                                                                                                                                                                                                                   | scaffold_4_mRNA_2147.1        | -                           | -                               |
| GF0029298 | 1                          | 0                        | 0                            | 0 Hypothetical protein (1)                                             |                                                                                                                                                                                                                                                                                                                                                                                                                                                                                                          |                                                                                                                                                                                                                                                                                                                   | scaffold_4_mRNA_2146.1        | -                           | -                               |
| GF0029297 | 1                          | 0                        | 0                            | 0 Hypothetical protein (1)                                             |                                                                                                                                                                                                                                                                                                                                                                                                                                                                                                          |                                                                                                                                                                                                                                                                                                                   | scaffold_4_mRNA_2141.1        | -                           | -                               |
| GF0029296 | 1                          | 0                        | 0                            | 0 Hypothetical protein (1)                                             |                                                                                                                                                                                                                                                                                                                                                                                                                                                                                                          |                                                                                                                                                                                                                                                                                                                   | scaffold_4_mRNA_2129.1        | -                           | -                               |
| GF0029295 | 1                          | 0                        | 0                            | 0 Hypothetical protein (1)                                             |                                                                                                                                                                                                                                                                                                                                                                                                                                                                                                          |                                                                                                                                                                                                                                                                                                                   | scaffold_4_mRNA_2126.1        | -                           | -                               |
| GF0029294 | 1                          | 0                        | 0                            | 0 Hypothetical protein (1)                                             | photosynthesis, light reaction [GO:0019684 biological_process] (1); plasma membrane light-harvesting complex [GO:0000077 cellular_component] (1); electron transporter, transferring electrons within the cyclic electron transport pathway of photosynthesis activity [GO:0045156 molecular_function] (1); integral component of membrane [GO:0016021 cellular_component] (1)                                                                                                                           | Antenna complex, alpha beta subunit [IPR000066] (1)                                                                                                                                                                                                                                                               | scaffold_4_mRNA_2125.1        | -                           | -                               |
| GF0029293 | 1                          | 0                        | 0                            | 0 Hypothetical protein (1)                                             |                                                                                                                                                                                                                                                                                                                                                                                                                                                                                                          |                                                                                                                                                                                                                                                                                                                   | scaffold_4_mRNA_2121.1        | -                           | -                               |
| GF0029292 | 1                          | 0                        | 0                            | 0 Hypothetical protein (1)                                             |                                                                                                                                                                                                                                                                                                                                                                                                                                                                                                          |                                                                                                                                                                                                                                                                                                                   | scaffold_4_mRNA_2120.1        | -                           | -                               |
| GF0029291 | 1                          | 0                        | 0                            | 0 Hypothetical protein (1)                                             |                                                                                                                                                                                                                                                                                                                                                                                                                                                                                                          |                                                                                                                                                                                                                                                                                                                   | scaffold_4_mRNA_2116.1        | -                           | -                               |
| GF0029290 | 1                          | 0                        | 0                            | 0 Tau class glutathione S-transferase (1)                              | protein binding [GO:0005515 molecular_function] (1)                                                                                                                                                                                                                                                                                                                                                                                                                                                      | Thioredoxin-like fold [IPR012336] (1); Glutathione S-transferase, C-terminal [IPR004046] (1); Thioredoxin-like fold [IPR012336] (1); Glutathione S-transferase, C-terminal-like [IPR010987] (1); Glutathione S-transferase, N-terminal [IPR004045] (1)                                                            | scaffold_4_mRNA_2114.1        | -                           | -                               |
| GF0029289 | 1                          | 0                        | 0                            | 0 Tau class glutathione S-transferase (1)                              | protein binding [GO:0005515 molecular_function] (1)                                                                                                                                                                                                                                                                                                                                                                                                                                                      | Glutathione S-transferase, C-terminal [IPR004046] (1); Thioredoxin-like fold [IPR012336] (1)                                                                                                                                                                                                                      | scaffold_4_mRNA_2112.1        | -                           | -                               |
| GF0029288 | 1                          | 0                        | 0                            | 0 Non-LTR retroelement reverse transcriptase-like (1)                  | nucleic acid binding [GO:0003676 molecular_function] (1); RNA-DNA hybrid ribonuclease activity [GO:0004523 molecular_function] (1)                                                                                                                                                                                                                                                                                                                                                                       | Ribonuclease H domain [IPR002156] (1); Ribonuclease H-like domain [IPR012337] (1); Reverse transcriptase zinc-binding domain [IPR026960] (1); TB2/DP1/HIV A22-related protein [IPR04345] (1)                                                                                                                      | scaffold_4_mRNA_2107.1        | -                           | -                               |
| GF0029287 | 1                          | 0                        | 0                            | 0 Hypothetical protein (1)                                             |                                                                                                                                                                                                                                                                                                                                                                                                                                                                                                          |                                                                                                                                                                                                                                                                                                                   | scaffold_4_mRNA_2103.1        | -                           | -                               |
| GF0029286 | 1                          | 0                        | 0                            | 0 Hypothetical protein (1)                                             |                                                                                                                                                                                                                                                                                                                                                                                                                                                                                                          |                                                                                                                                                                                                                                                                                                                   | scaffold_4_mRNA_2087.1        | -                           | -                               |
| GF0029285 | 1                          | 0                        | 0                            | 0 Hypothetical protein (1)                                             |                                                                                                                                                                                                                                                                                                                                                                                                                                                                                                          |                                                                                                                                                                                                                                                                                                                   | scaffold_4_mRNA_2086.1        | -                           | -                               |
| GF0029284 | 1                          | 0                        | 0                            | 0 NAC domain transcription factor, putative, expressed (1)             | DNA binding [GO:0003677 molecular_function] (1); regulation of transcription, DNA-templated [GO:0006355 biological_process] (1)                                                                                                                                                                                                                                                                                                                                                                          | NAC domain [IPR003441] (1)                                                                                                                                                                                                                                                                                        | scaffold_4_mRNA_2076.1        | -                           | -                               |

| ID        | Num. in <i>C. clementiae</i> | Num. in <i>C. uchiha</i> | Num. in <i>P. trifoliata</i> | Note                                                           | GO                                                                                                                                                                                                                                                                           | InterPro                                                                                                                                                                                                                                                                                                   | Members in <i>C. clementiae</i> | Members in <i>C. uchiha</i> | Members in <i>P. trifoliata</i> |
|-----------|------------------------------|--------------------------|------------------------------|----------------------------------------------------------------|------------------------------------------------------------------------------------------------------------------------------------------------------------------------------------------------------------------------------------------------------------------------------|------------------------------------------------------------------------------------------------------------------------------------------------------------------------------------------------------------------------------------------------------------------------------------------------------------|---------------------------------|-----------------------------|---------------------------------|
| GF0029283 | 1                            | 0                        | 0                            | 0 Hypothetical protein (1)                                     | membrane [GO:0016020]<br>cellular_component (1); antiporter activity [GO:0015297]                                                                                                                                                                                            | High mobility group box domain [IPR009071] (1)                                                                                                                                                                                                                                                             | scaffold_4_mRNA_2069.2          | -                           | -                               |
| GF0029282 | 1                            | 0                        | 0                            | 0 Hypothetical protein (1)                                     | membrane [GO:0016020]<br>cellular_component (1); drug transmembrane transporter activity [GO:0015238 molecular_function] (1); drug transmembrane transport [GO:0006855 biological_process] (1); transmembrane transport [GO:0055085 biological_process] (1)                  | Multi antimicrobial extrusion protein [IPR025258] (1)                                                                                                                                                                                                                                                      | scaffold_4_mRNA_2063.1          | -                           | -                               |
| GF0029281 | 1                            | 0                        | 0                            | 0 Hypothetical protein (1)                                     |                                                                                                                                                                                                                                                                              | Domain of unknown function DUF4005 [IPR025064] (1)                                                                                                                                                                                                                                                         | scaffold_4_mRNA_2059.1          | -                           | -                               |
| GF0029280 | 1                            | 0                        | 0                            | 0 Hypothetical protein (1)                                     |                                                                                                                                                                                                                                                                              | Domain of unknown function DUF4005 [IPR025064] (1)                                                                                                                                                                                                                                                         | scaffold_4_mRNA_2056.1          | -                           | -                               |
| GF0029279 | 1                            | 0                        | 0                            | 0 MATE efflux family protein, expressed (1)                    | transmembrane transport [GO:0006855 biological_process] (1); antiporter activity [GO:0015297 molecular_function] (1); drug transmembrane transporter activity [GO:0015238 molecular_function] (1); membrane [GO:0016020 cellular_component] (1)                              | Multi antimicrobial extrusion protein [IPR025258] (1)                                                                                                                                                                                                                                                      | scaffold_4_mRNA_2053.1          | -                           | -                               |
| GF0029278 | 1                            | 0                        | 0                            | 0 MATE family protein, expressed (1)                           | transmembrane transport [GO:0006855 biological_process] (1); drug transmembrane transporter activity [GO:0015238 molecular_function] (1); antiporter activity [GO:0015297 molecular_function] (1); membrane [GO:0016020 cellular_component] (1)                              | Multi antimicrobial extrusion protein [IPR025258] (1)                                                                                                                                                                                                                                                      | scaffold_4_mRNA_2052.1          | -                           | -                               |
| GF0029277 | 1                            | 0                        | 0                            | 0 Hypothetical protein (1)                                     |                                                                                                                                                                                                                                                                              |                                                                                                                                                                                                                                                                                                            | scaffold_4_mRNA_2050.1          | -                           | -                               |
| GF0029276 | 1                            | 0                        | 0                            | 0 Hypothetical protein (1)                                     |                                                                                                                                                                                                                                                                              |                                                                                                                                                                                                                                                                                                            | scaffold_4_mRNA_2026.1          | -                           | -                               |
| GF0029275 | 1                            | 0                        | 0                            | 0 RNA-directed DNA polymerase ; Ribonuclease H; putative (1)   |                                                                                                                                                                                                                                                                              | Endonuclease/exonuclease/phosphatase protein Sbc/ribosomal biogenesis NSAZ [IPR005135] (1)                                                                                                                                                                                                                 | scaffold_4_mRNA_2022.1          | -                           | -                               |
| GF0029274 | 1                            | 0                        | 0                            | 0 Hypothetical protein (1)                                     |                                                                                                                                                                                                                                                                              |                                                                                                                                                                                                                                                                                                            | scaffold_4_mRNA_2021.1          | -                           | -                               |
| GF0029273 | 1                            | 0                        | 0                            | 0 Hypothetical protein (1)                                     | nucleic acid binding [GO:0003676 molecular_function] (1); zinc ion binding [GO:0008270 molecular_function] (1)                                                                                                                                                               | Zinc finger, CCHC-type [IPR001878] (1)                                                                                                                                                                                                                                                                     | scaffold_4_mRNA_2013.1          | -                           | -                               |
| GF0029272 | 1                            | 0                        | 0                            | 0 Hypothetical protein (1)                                     |                                                                                                                                                                                                                                                                              | Domain of unknown function DUF4283 [IPR025558] (1)                                                                                                                                                                                                                                                         | scaffold_4_mRNA_2012.1          | -                           | -                               |
| GF0029271 | 1                            | 0                        | 0                            | 0 Hypothetical protein (1)                                     | intracellular [GO:0005622 cellular_component] (1); translation [GO:0006412 biological_process] (1); structural constituent of ribosome [GO:0003735 molecular_function] (1); ribosome [GO:0005840 cellular_component] (1)                                                     | Ribosomal protein S8e, conserved site [IPR018283] (1); Ribosomal protein S8e [IPR01047] (1); Transposase, MsdR, plant [IPR004332] (1); Ribosomal protein Sbc/ribosomal biogenesis NSAZ [IPR022309] (1)                                                                                                     | scaffold_4_mRNA_2010.1          | -                           | -                               |
| GF0029270 | 1                            | 0                        | 0                            | 0 Hypothetical protein (1)                                     |                                                                                                                                                                                                                                                                              |                                                                                                                                                                                                                                                                                                            | scaffold_4_mRNA_2006.1          | -                           | -                               |
| GF0029269 | 1                            | 0                        | 0                            | 0 Hypothetical protein (1)                                     |                                                                                                                                                                                                                                                                              |                                                                                                                                                                                                                                                                                                            | scaffold_4_mRNA_2003.1          | -                           | -                               |
| GF0029268 | 1                            | 0                        | 0                            | 0 Hypothetical protein (1)                                     | nucleic acid binding [GO:0003676 molecular_function] (1)                                                                                                                                                                                                                     | Ribonuclease H-like domain [IPR012337] (1)                                                                                                                                                                                                                                                                 | scaffold_4_mRNA_2002.1          | -                           | -                               |
| GF0029267 | 1                            | 0                        | 0                            | 0 Hypothetical protein (1)                                     | zinc ion binding [GO:0008270 molecular_function] (1); aspartic-type endopeptidase activity [GO:0004190 molecular_function] (1); nucleic acid binding [GO:0003676 molecular_function] (1); proteolysis [GO:0006508 biological_process] (1)                                    | Aspartic peptidase domain [IPR021109] (1); Zinc finger, CCHC-type [IPR001878] (1); Viral movement protein [IPR028919] (1); Retropepsins [IPR018061] (1); Peptidase_A2A, retrovirus, catalytic [IPR001995] (1); Aspartic peptidase, active site [IPR001969] (1)                                             | scaffold_4_mRNA_1997.1          | -                           | -                               |
| GF0029266 | 1                            | 0                        | 0                            | 0 Hypothetical protein (1)                                     |                                                                                                                                                                                                                                                                              |                                                                                                                                                                                                                                                                                                            | scaffold_4_mRNA_1985.1          | -                           | -                               |
| GF0029265 | 1                            | 0                        | 0                            | 0 Hypothetical protein (1)                                     |                                                                                                                                                                                                                                                                              |                                                                                                                                                                                                                                                                                                            | scaffold_4_mRNA_1968.1          | -                           | -                               |
| GF0029264 | 1                            | 0                        | 0                            | 0 Hypothetical protein (1)                                     |                                                                                                                                                                                                                                                                              |                                                                                                                                                                                                                                                                                                            | scaffold_4_mRNA_1956.1          | -                           | -                               |
| GF0029263 | 1                            | 0                        | 0                            | 0 Hypothetical protein (1)                                     |                                                                                                                                                                                                                                                                              |                                                                                                                                                                                                                                                                                                            | scaffold_4_mRNA_1952.1          | -                           | -                               |
| GF0029262 | 1                            | 0                        | 0                            | 0 Hypothetical protein (1)                                     |                                                                                                                                                                                                                                                                              | Arabidopsis retrotransposon On1 [IPR004312] (1); Leucine-rich repeat [IPR001611] (1); Leucine-rich repeat-containing N-terminal, plant-type [IPR012101] (1); Leucine-rich repeat domain, L domain-like [IPR032675] (1); Leucine-rich repeat, typical subtype [IPR003591] (1)                               | scaffold_4_mRNA_1951.1          | -                           | -                               |
| GF0029261 | 1                            | 0                        | 0                            | 0 LRR receptor-like kinase family protein (1)                  | protein binding [GO:0005515 molecular_function] (1)                                                                                                                                                                                                                          |                                                                                                                                                                                                                                                                                                            | scaffold_4_mRNA_1950.1          | -                           | -                               |
| GF0029260 | 1                            | 0                        | 0                            | 0 Hypothetical protein (1)                                     |                                                                                                                                                                                                                                                                              |                                                                                                                                                                                                                                                                                                            | scaffold_4_mRNA_1948.1          | -                           | -                               |
| GF0029259 | 1                            | 0                        | 0                            | 0 Hypothetical protein (1)                                     |                                                                                                                                                                                                                                                                              |                                                                                                                                                                                                                                                                                                            | scaffold_4_mRNA_1947.1          | -                           | -                               |
| GF0029258 | 1                            | 0                        | 0                            | 0 Cytokinin riboside 5'-monophosphate phosphoribohydrolase (1) |                                                                                                                                                                                                                                                                              | Cytokinin riboside 5'-monophosphate phosphoribohydrolase LOG [IPR005269] (1); LOG family [IPR031100] (1)                                                                                                                                                                                                   | scaffold_4_mRNA_1946.1          | -                           | -                               |
| GF0029257 | 1                            | 0                        | 0                            | 0 Hypothetical protein (1)                                     |                                                                                                                                                                                                                                                                              |                                                                                                                                                                                                                                                                                                            | scaffold_4_mRNA_1945.1          | -                           | -                               |
| GF0029256 | 1                            | 0                        | 0                            | 0 Hypothetical protein (1)                                     |                                                                                                                                                                                                                                                                              |                                                                                                                                                                                                                                                                                                            | scaffold_4_mRNA_1944.1          | -                           | -                               |
| GF0029255 | 1                            | 0                        | 0                            | 0 Hypothetical protein (1)                                     |                                                                                                                                                                                                                                                                              |                                                                                                                                                                                                                                                                                                            | scaffold_4_mRNA_1941.1          | -                           | -                               |
| GF0029254 | 1                            | 0                        | 0                            | 0 Hypothetical protein (1)                                     |                                                                                                                                                                                                                                                                              |                                                                                                                                                                                                                                                                                                            | scaffold_4_mRNA_1938.1          | -                           | -                               |
| GF0029253 | 1                            | 0                        | 0                            | 0 Hypothetical protein (1)                                     |                                                                                                                                                                                                                                                                              |                                                                                                                                                                                                                                                                                                            | scaffold_4_mRNA_1937.1          | -                           | -                               |
| GF0029252 | 1                            | 0                        | 0                            | 0 Hypothetical protein (1)                                     |                                                                                                                                                                                                                                                                              | Aspartic peptidase domain [IPR021109] (1)                                                                                                                                                                                                                                                                  | scaffold_4_mRNA_1936.1          | -                           | -                               |
| GF0029251 | 1                            | 0                        | 0                            | 0 Hypothetical protein (1)                                     |                                                                                                                                                                                                                                                                              |                                                                                                                                                                                                                                                                                                            | scaffold_4_mRNA_1933.1          | -                           | -                               |
| GF0029250 | 1                            | 0                        | 0                            | 0 Putative callose synthase 8 (1)                              | (1->3)-beta-D-glucan biosynthetic process [GO:0006075 biological_process] (1); 1,3-beta-D-glucan synthase complex [GO:0000148 cellular_component] (1); 1,3-beta-D-glucan synthase activity [GO:0003843 molecular_function] (1); membrane [GO:0016020 cellular_component] (1) | Glycosyl transferase, family 48 [IPR003440] (1); 1,3-beta-glucan synthase subunit FKS1-like, domain-1 [IPR026899] (1)                                                                                                                                                                                      | scaffold_4_mRNA_1930.1          | -                           | -                               |
| GF0029249 | 1                            | 0                        | 0                            | 0 Hypothetical protein (1)                                     | cysteine-type peptidase activity [GO:0008234 molecular_function] (1); proteolysis [GO:0006508 biological_process] (1)                                                                                                                                                        | Domain of unknown function DUF1985 [IPR015410] (1); Ulp1 protease family, C-terminal catalytic domain [IPR003653] (1)                                                                                                                                                                                      | scaffold_4_mRNA_1928.1          | -                           | -                               |
| GF0029248 | 1                            | 0                        | 0                            | 0 Hypothetical protein (1)                                     |                                                                                                                                                                                                                                                                              |                                                                                                                                                                                                                                                                                                            | scaffold_4_mRNA_1924.1          | -                           | -                               |
| GF0029247 | 1                            | 0                        | 0                            | 0 Hypothetical protein (1)                                     |                                                                                                                                                                                                                                                                              |                                                                                                                                                                                                                                                                                                            | scaffold_4_mRNA_1915.1          | -                           | -                               |
| GF0029246 | 1                            | 0                        | 0                            | 0 Hypothetical protein (1)                                     |                                                                                                                                                                                                                                                                              |                                                                                                                                                                                                                                                                                                            | scaffold_4_mRNA_1892.1          | -                           | -                               |
| GF0029245 | 1                            | 0                        | 0                            | 0 Hypothetical protein (1)                                     |                                                                                                                                                                                                                                                                              |                                                                                                                                                                                                                                                                                                            | scaffold_4_mRNA_1886.1          | -                           | -                               |
| GF0029244 | 1                            | 0                        | 0                            | 0 Hypothetical protein (1)                                     |                                                                                                                                                                                                                                                                              |                                                                                                                                                                                                                                                                                                            | scaffold_4_mRNA_1878.1          | -                           | -                               |
| GF0029243 | 1                            | 0                        | 0                            | 0 Hypothetical protein (1)                                     |                                                                                                                                                                                                                                                                              | Domain of unknown function DUF4283 [IPR025558] (1); Glutathione S-transferase, C-terminal-like [IPR010987] (1); Glutathione S-transferase, C-terminal [IPR004046] (1); Glutathione S-transferases Phi, C-terminal [IPR034347] (1)                                                                          | scaffold_4_mRNA_1875.1          | -                           | -                               |
| GF0029242 | 1                            | 0                        | 0                            | 0 Phi class glutathione S-transferase (1)                      |                                                                                                                                                                                                                                                                              | Regulatory protein NPR, central domain [IPR024228] (1); SKP1/BTB/POZ domain [IPR011333] (1); Ankyrin repeat [IPR002110] (1); BTB/POZ domain [IPR002110] (1); TRAM/LAGL1/CLN8 homology domain [IPR006634] (1); NPR1/NIM1-like, C-terminal [IPR021094] (1); Ankyrin repeat-containing domain [IPR020683] (1) | scaffold_4_mRNA_1874.1          | -                           | -                               |
| GF0029241 | 1                            | 0                        | 0                            | 0 Hypothetical protein (1)                                     | integral component of membrane [GO:0016021 cellular_component] (1); protein binding [GO:0005515 molecular_function] (1)                                                                                                                                                      | Regulatory protein NPR, central domain [IPR024228] (1); SKP1/BTB/POZ domain [IPR011333] (1); Ankyrin repeat [IPR002110] (1); BTB/POZ domain [IPR002110] (1); TRAM/LAGL1/CLN8 homology domain [IPR006634] (1); NPR1/NIM1-like, C-terminal [IPR021094] (1); Ankyrin repeat-containing domain [IPR020683] (1) | scaffold_4_mRNA_1871.1          | -                           | -                               |
| GF0029240 | 1                            | 0                        | 0                            | 0 Non-expressor of PR1 (1)                                     | protein binding [GO:0005515 molecular_function] (1)                                                                                                                                                                                                                          | SKP1/BTB/POZ domain [IPR011333] (1); Regulatory protein NPR, central domain [IPR024228] (1); Ankyrin repeat [IPR002110] (1); BTB/POZ domain [IPR002110] (1); NPR1/NIM1-like, C-terminal [IPR021094] (1); Ankyrin repeat-containing domain [IPR020683] (1)                                                  | scaffold_4_mRNA_1867.1          | -                           | -                               |
| GF0029239 | 1                            | 0                        | 0                            | 0 Hypothetical protein (1)                                     |                                                                                                                                                                                                                                                                              | Ankyrin repeat-containing domain [IPR020683] (1); NPR1/NIM1-like, C-terminal [IPR021094] (1); BTB/POZ domain [IPR002110] (1); SKP1/BTB/POZ domain [IPR011333] (1); Regulatory protein NPR, central domain [IPR024228] (1); Ankyrin repeat [IPR002110] (1)                                                  | scaffold_4_mRNA_1865.1          | -                           | -                               |
| GF0029238 | 1                            | 0                        | 0                            | 0 Hypothetical protein (1)                                     | protein binding [GO:0005515 molecular_function] (1)                                                                                                                                                                                                                          | SKP1/BTB/POZ domain [IPR011333] (1); Regulatory protein NPR, central domain [IPR024228] (1); Ankyrin repeat [IPR002110] (1)                                                                                                                                                                                | scaffold_4_mRNA_1864.1          | -                           | -                               |
| GF0029237 | 1                            | 0                        | 0                            | 0 Hypothetical protein (1)                                     |                                                                                                                                                                                                                                                                              |                                                                                                                                                                                                                                                                                                            | scaffold_4_mRNA_1859.1          | -                           | -                               |
| GF0029236 | 1                            | 0                        | 0                            | 0 Non-expressor of pathogenesis-related protein 1 (1)          | protein binding [GO:0005515 molecular_function] (1)                                                                                                                                                                                                                          | BTB/POZ domain [IPR002110] (1); NPR1/NIM1-like, C-terminal [IPR021094] (1); Ankyrin repeat-containing domain [IPR020683] (1); SKP1/BTB/POZ domain [IPR011333] (1); Ankyrin repeat [IPR002110] (1)                                                                                                          | scaffold_4_mRNA_1857.1          | -                           | -                               |

| ID        | Num. in <i>C. clementinae</i> | Num. in <i>C. uastha</i> | Num. in <i>P. trifoliata</i> | Note                                                         | GO                                                                                                                                                                         | InterPro                                                                                                                                                                                                                                                                                                                                                                                                                                                                                                                                                                                               | Members in <i>C. clementinae</i>           | Members in <i>C. uastha</i> | Members in <i>P. trifoliata</i> |
|-----------|-------------------------------|--------------------------|------------------------------|--------------------------------------------------------------|----------------------------------------------------------------------------------------------------------------------------------------------------------------------------|--------------------------------------------------------------------------------------------------------------------------------------------------------------------------------------------------------------------------------------------------------------------------------------------------------------------------------------------------------------------------------------------------------------------------------------------------------------------------------------------------------------------------------------------------------------------------------------------------------|--------------------------------------------|-----------------------------|---------------------------------|
| GF0029235 | 1                             | 0                        | 0                            | Regulatory protein NPR1 (1)                                  | protein binding [GO:0005515]<br>molecular_function (1)                                                                                                                     | BTB/POZ domain [IPR000210] (1);<br>NPR1/NIM1-like, C-terminal [IPR021094] (1); Ankyrin repeat-containing domain [IPR020683] (1);<br>Regulatory protein NPR, central domain [IPR024228] (1); SKP1/ BTB/POZ domain [IPR011333] (1); Ankyrin repeat [IPR002110] (1);<br>Ankyrin repeat [IPR002110] (1); SKP1/ BTB/POZ domain [IPR011333] (1); Regulatory protein NPR, central domain [IPR024228] (1); P-loop containing nucleoside triphosphate hydrolase [IPR027417] (1); BTB/POZ domain [IPR00210] (1); NPR1/NIM1-like, C-terminal [IPR021094] (1);<br>Ankyrin repeat-containing domain [IPR020683] (1) | scaffold_4_mRNA_1854.1                     | -                           | -                               |
| GF0029234 | 1                             | 0                        | 0                            | Hypothetical protein (1)                                     | protein binding [GO:0005515]<br>molecular_function (1)                                                                                                                     | BTB/POZ domain [IPR000210] (1);<br>NPR1/NIM1-like, C-terminal [IPR021094] (1); Ankyrin repeat-containing domain [IPR020683] (1);<br>Regulatory protein NPR, central domain [IPR024228] (1); SKP1/ BTB/POZ domain [IPR011333] (1); Ankyrin repeat [IPR002110] (1);<br>Ankyrin repeat [IPR002110] (1); SKP1/ BTB/POZ domain [IPR011333] (1); Regulatory protein NPR, central domain [IPR024228] (1); P-loop containing nucleoside triphosphate hydrolase [IPR027417] (1); BTB/POZ domain [IPR00210] (1); NPR1/NIM1-like, C-terminal [IPR021094] (1);<br>Ankyrin repeat-containing domain [IPR020683] (1) | scaffold_4_mRNA_1853.1                     | -                           | -                               |
| GF0029233 | 1                             | 0                        | 0                            | Hypothetical protein (1)                                     |                                                                                                                                                                            |                                                                                                                                                                                                                                                                                                                                                                                                                                                                                                                                                                                                        | scaffold_4_mRNA_1847.1                     | -                           | -                               |
| GF0029232 | 1                             | 0                        | 0                            | Hypothetical protein (1)                                     |                                                                                                                                                                            |                                                                                                                                                                                                                                                                                                                                                                                                                                                                                                                                                                                                        | scaffold_4_mRNA_1837.1                     | -                           | -                               |
| GF0029231 | 1                             | 0                        | 0                            | Hypothetical protein (1)                                     | nucleic acid binding [GO:0003676]<br>molecular_function (1); zinc ion binding [GO:0008270 molecular_function] (1)                                                          | Zinc finger, CCHC-type [IPR001878] (1); Ribonuclease H-like domain [IPR012337] (1); Reverse transcriptase, RNA-dependent DNA polymerase [IPR013103] (1)                                                                                                                                                                                                                                                                                                                                                                                                                                                | scaffold_4_mRNA_1835.1                     | -                           | -                               |
| GF0029230 | 1                             | 0                        | 0                            | Hypothetical protein (1)                                     |                                                                                                                                                                            |                                                                                                                                                                                                                                                                                                                                                                                                                                                                                                                                                                                                        | scaffold_4_mRNA_1830.1                     | -                           | -                               |
| GF0029229 | 1                             | 0                        | 0                            | Hypothetical protein (1)                                     |                                                                                                                                                                            |                                                                                                                                                                                                                                                                                                                                                                                                                                                                                                                                                                                                        | scaffold_4_mRNA_1824.1                     | -                           | -                               |
| GF0029228 | 1                             | 0                        | 0                            | Hypothetical protein (1)                                     | protein binding [GO:0005515]<br>molecular_function (1)                                                                                                                     | C2 domain [IPR000008] (1)                                                                                                                                                                                                                                                                                                                                                                                                                                                                                                                                                                              | scaffold_4_mRNA_1823.1                     | -                           | -                               |
| GF0029227 | 1                             | 0                        | 0                            | Hypothetical protein (1)                                     |                                                                                                                                                                            |                                                                                                                                                                                                                                                                                                                                                                                                                                                                                                                                                                                                        | scaffold_4_mRNA_1821.1                     | -                           | -                               |
| GF0029226 | 1                             | 0                        | 0                            | Hypothetical protein (1)                                     |                                                                                                                                                                            | Endonuclease/exonuclease/phosphatase [IPR005135] (1)                                                                                                                                                                                                                                                                                                                                                                                                                                                                                                                                                   | scaffold_4_mRNA_1820.1                     | -                           | -                               |
| GF0029225 | 1                             | 0                        | 0                            | Hypothetical protein (1)                                     |                                                                                                                                                                            |                                                                                                                                                                                                                                                                                                                                                                                                                                                                                                                                                                                                        | scaffold_4_mRNA_1814.1                     | -                           | -                               |
| GF0029224 | 1                             | 0                        | 0                            | Hypothetical protein (1)                                     |                                                                                                                                                                            |                                                                                                                                                                                                                                                                                                                                                                                                                                                                                                                                                                                                        | scaffold_4_mRNA_1798.1                     | -                           | -                               |
| GF0029223 | 1                             | 0                        | 0                            | Hypothetical protein (1)                                     |                                                                                                                                                                            |                                                                                                                                                                                                                                                                                                                                                                                                                                                                                                                                                                                                        | scaffold_4_mRNA_1796.1                     | -                           | -                               |
| GF0029222 | 1                             | 0                        | 0                            | Hypothetical protein (1)                                     |                                                                                                                                                                            |                                                                                                                                                                                                                                                                                                                                                                                                                                                                                                                                                                                                        | scaffold_4_mRNA_1791.1                     | -                           | -                               |
| GF0029221 | 1                             | 0                        | 0                            | Hypothetical protein (1)                                     |                                                                                                                                                                            |                                                                                                                                                                                                                                                                                                                                                                                                                                                                                                                                                                                                        | scaffold_4_mRNA_1789.1                     | -                           | -                               |
| GF0029220 | 1                             | 0                        | 0                            | Zinc knuckle family protein (1)                              | zinc ion binding [GO:0008270 molecular_function] (1); nucleic acid binding [GO:0003676 molecular_function] (1)                                                             | Zinc finger, CCHC-type [IPR001878] (1); Domain of unknown function DUF4219 [IPR025314] (1)                                                                                                                                                                                                                                                                                                                                                                                                                                                                                                             | scaffold_4_mRNA_1786.1                     | -                           | -                               |
| GF0029219 | 1                             | 0                        | 0                            | Stress up-regulated Nod 19 protein (1)                       |                                                                                                                                                                            | Stress up-regulated Nod 19 [IPR011692] (1)                                                                                                                                                                                                                                                                                                                                                                                                                                                                                                                                                             | scaffold_4_mRNA_1764.1                     | -                           | -                               |
| GF0029218 | 1                             | 0                        | 0                            | Hypothetical protein (1)                                     | zinc ion binding [GO:0008270 molecular_function] (1); nucleic acid binding [GO:0003676 molecular_function] (1)                                                             | Zinc finger, CCHC-type [IPR001878] (1)                                                                                                                                                                                                                                                                                                                                                                                                                                                                                                                                                                 | scaffold_4_mRNA_1745.1                     | -                           | -                               |
| GF0029217 | 1                             | 0                        | 0                            | Hypothetical protein (1)                                     |                                                                                                                                                                            |                                                                                                                                                                                                                                                                                                                                                                                                                                                                                                                                                                                                        | scaffold_4_mRNA_1744.1                     | -                           | -                               |
| GF0029216 | 1                             | 0                        | 0                            | Transporter, Pam16 (1)                                       | protein import into mitochondrial matrix [GO:0030150 biological_process] (1); mitochondrial inner membrane protein translocase complex [GO:0005744 cellular_component] (1) | Mitochondrial import inner membrane translocase subunit Tim16 [IPR0005541] (1)                                                                                                                                                                                                                                                                                                                                                                                                                                                                                                                         | scaffold_4_mRNA_1735.1                     | -                           | -                               |
| GF0029215 | 1                             | 0                        | 0                            | Hypothetical protein (1)                                     |                                                                                                                                                                            | LOG family [IPR031100] (1)                                                                                                                                                                                                                                                                                                                                                                                                                                                                                                                                                                             | scaffold_4_mRNA_1719.1                     | -                           | -                               |
| GF0029214 | 1                             | 0                        | 0                            | Hypothetical protein (1)                                     |                                                                                                                                                                            |                                                                                                                                                                                                                                                                                                                                                                                                                                                                                                                                                                                                        | scaffold_4_mRNA_1714.1                     | -                           | -                               |
| GF0029213 | 1                             | 0                        | 0                            | Hypothetical protein (1)                                     |                                                                                                                                                                            |                                                                                                                                                                                                                                                                                                                                                                                                                                                                                                                                                                                                        | scaffold_4_mRNA_1709.1                     | -                           | -                               |
| GF0029212 | 1                             | 0                        | 0                            | Hypothetical protein (1)                                     |                                                                                                                                                                            |                                                                                                                                                                                                                                                                                                                                                                                                                                                                                                                                                                                                        | scaffold_4_mRNA_1708.1                     | -                           | -                               |
| GF0029211 | 1                             | 0                        | 0                            | Hypothetical protein (1)                                     | Polynucleotidyl transferase, Ribonuclease H fold (1)                                                                                                                       | nucleic acid binding [GO:0003676 molecular_function] (1)                                                                                                                                                                                                                                                                                                                                                                                                                                                                                                                                               | Ribonuclease H-like domain [IPR012337] (1) | scaffold_4_mRNA_1705.1      | -                               |
| GF0029210 | 1                             | 0                        | 0                            | Hypothetical protein (1)                                     | zinc ion binding [GO:0008270 molecular_function] (1); nucleic acid binding [GO:0003676 molecular_function] (1)                                                             | Zinc knuckle CX2CX4HX4C [IPR025836] (1); Zinc finger, CCHC-type [IPR001878] (1); Domain of unknown function DUF4283 [IPR025558] (1)                                                                                                                                                                                                                                                                                                                                                                                                                                                                    | scaffold_4_mRNA_171.1                      | -                           | -                               |
| GF0029209 | 1                             | 0                        | 0                            | Hypothetical protein (1)                                     |                                                                                                                                                                            | Retrosposon gag domain [IPR005162] (1)                                                                                                                                                                                                                                                                                                                                                                                                                                                                                                                                                                 | scaffold_4_mRNA_1698.1                     | -                           | -                               |
| GF0029208 | 1                             | 0                        | 0                            | Hypothetical protein (1)                                     | nucleic acid binding [GO:0003676 molecular_function] (1); regulation of transcription, DNA-templated [GO:0006355 biological_process] (1)                                   | Carlavirus nucleic acid-binding protein [IPR002568] (1)                                                                                                                                                                                                                                                                                                                                                                                                                                                                                                                                                | scaffold_4_mRNA_1697.1                     | -                           | -                               |
| GF0029207 | 1                             | 0                        | 0                            | Cytokinin riboside 5'-monophosphate phosphoribohydrolase (1) |                                                                                                                                                                            | LOG family [IPR031100] (1); Cytokinin riboside 5'-monophosphate phosphoribohydrolase LOG [IPR005269] (1)                                                                                                                                                                                                                                                                                                                                                                                                                                                                                               | scaffold_4_mRNA_1696.1                     | -                           | -                               |
| GF0029206 | 1                             | 0                        | 0                            | Hypothetical protein (1)                                     |                                                                                                                                                                            |                                                                                                                                                                                                                                                                                                                                                                                                                                                                                                                                                                                                        | scaffold_4_mRNA_1690.1                     | -                           | -                               |
| GF0029205 | 1                             | 0                        | 0                            | Hypothetical protein (1)                                     |                                                                                                                                                                            |                                                                                                                                                                                                                                                                                                                                                                                                                                                                                                                                                                                                        | scaffold_4_mRNA_1688.1                     | -                           | -                               |
| GF0029204 | 1                             | 0                        | 0                            | Hypothetical protein (1)                                     |                                                                                                                                                                            |                                                                                                                                                                                                                                                                                                                                                                                                                                                                                                                                                                                                        | scaffold_4_mRNA_1684.1                     | -                           | -                               |
| GF0029203 | 1                             | 0                        | 0                            | Hypothetical protein (1)                                     | zinc ion binding [GO:0008270 molecular_function] (1); nucleic acid binding [GO:0003676 molecular_function] (1)                                                             | Zinc knuckle CX2CX4HX4C [IPR025836] (1); Zinc finger, CCHC-type [IPR001878] (1); Domain of unknown function DUF4283 [IPR025558] (1)                                                                                                                                                                                                                                                                                                                                                                                                                                                                    | scaffold_4_mRNA_1678.1                     | -                           | -                               |
| GF0029202 | 1                             | 0                        | 0                            | Hypothetical protein (1)                                     |                                                                                                                                                                            |                                                                                                                                                                                                                                                                                                                                                                                                                                                                                                                                                                                                        | scaffold_4_mRNA_1675.1                     | -                           | -                               |
| GF0029201 | 1                             | 0                        | 0                            | Cytokinin riboside 5'-monophosphate phosphoribohydrolase (1) |                                                                                                                                                                            | Cytokinin riboside 5'-monophosphate phosphoribohydrolase LOG [IPR005269] (1); LOG family [IPR031100] (1)                                                                                                                                                                                                                                                                                                                                                                                                                                                                                               | scaffold_4_mRNA_1674.1                     | -                           | -                               |
| GF0029200 | 1                             | 0                        | 0                            | Monosaccharide transport protein (1)                         |                                                                                                                                                                            |                                                                                                                                                                                                                                                                                                                                                                                                                                                                                                                                                                                                        | scaffold_4_mRNA_1665.1                     | -                           | -                               |
| GF0029199 | 1                             | 0                        | 0                            | Cytokinin riboside 5'-monophosphate phosphoribohydrolase (1) |                                                                                                                                                                            | LOG family [IPR031100] (1)                                                                                                                                                                                                                                                                                                                                                                                                                                                                                                                                                                             | scaffold_4_mRNA_1662.1                     | -                           | -                               |
| GF0029198 | 1                             | 0                        | 0                            | Hypothetical protein (1)                                     |                                                                                                                                                                            |                                                                                                                                                                                                                                                                                                                                                                                                                                                                                                                                                                                                        | scaffold_4_mRNA_1661.1                     | -                           | -                               |
| GF0029197 | 1                             | 0                        | 0                            | Hypothetical protein (1)                                     | regulation of transcription, DNA-templated [GO:0006355 biological_process] (1); nucleic acid binding [GO:0003676 molecular_function] (1)                                   | Carlavirus nucleic acid-binding protein [IPR002568] (1)                                                                                                                                                                                                                                                                                                                                                                                                                                                                                                                                                | scaffold_4_mRNA_1659.1                     | -                           | -                               |
| GF0029196 | 1                             | 0                        | 0                            | Hypothetical protein (1)                                     |                                                                                                                                                                            |                                                                                                                                                                                                                                                                                                                                                                                                                                                                                                                                                                                                        | scaffold_4_mRNA_1649.1                     | -                           | -                               |
| GF0029195 | 1                             | 0                        | 0                            | Hypothetical protein (1)                                     |                                                                                                                                                                            |                                                                                                                                                                                                                                                                                                                                                                                                                                                                                                                                                                                                        | scaffold_4_mRNA_1648.1                     | -                           | -                               |
| GF0029194 | 1                             | 0                        | 0                            | Hypothetical protein (1)                                     |                                                                                                                                                                            |                                                                                                                                                                                                                                                                                                                                                                                                                                                                                                                                                                                                        | scaffold_4_mRNA_1647.1                     | -                           | -                               |
| GF0029193 | 1                             | 0                        | 0                            | Hypothetical protein (1)                                     |                                                                                                                                                                            |                                                                                                                                                                                                                                                                                                                                                                                                                                                                                                                                                                                                        | scaffold_4_mRNA_1646.1                     | -                           | -                               |
| GF0029192 | 1                             | 0                        | 0                            | Hypothetical protein (1)                                     | nucleic acid binding [GO:0003676 molecular_function] (1); regulation of transcription, DNA-templated [GO:0006355 biological_process] (1)                                   | Carlavirus nucleic acid-binding protein [IPR002568] (1)                                                                                                                                                                                                                                                                                                                                                                                                                                                                                                                                                | scaffold_4_mRNA_1645.1                     | -                           | -                               |
| GF0029191 | 1                             | 0                        | 0                            | Hypothetical protein (1)                                     |                                                                                                                                                                            |                                                                                                                                                                                                                                                                                                                                                                                                                                                                                                                                                                                                        | scaffold_4_mRNA_1644.1                     | -                           | -                               |
| GF0029190 | 1                             | 0                        | 0                            | Hypothetical protein (1)                                     |                                                                                                                                                                            |                                                                                                                                                                                                                                                                                                                                                                                                                                                                                                                                                                                                        | scaffold_4_mRNA_1643.1                     | -                           | -                               |
| GF0029189 | 1                             | 0                        | 0                            | Hypothetical protein (1)                                     |                                                                                                                                                                            | Cytokinin riboside 5'-monophosphate phosphoribohydrolase LOG [IPR005269] (1); Retrosposon gag domain [IPR005162] (1); LOG family [IPR031100] (1)                                                                                                                                                                                                                                                                                                                                                                                                                                                       | scaffold_4_mRNA_1642.1                     | -                           | -                               |
| GF0029188 | 1                             | 0                        | 0                            | Hypothetical protein (1)                                     | nucleic acid binding [GO:0003676 molecular_function] (1); DNA integration [GO:0015074 biological_process] (1)                                                              | Integrase, catalytic core [IPR001584] (1); Ribonuclease H-like domain [IPR012337] (1)                                                                                                                                                                                                                                                                                                                                                                                                                                                                                                                  | scaffold_4_mRNA_1641.1                     | -                           | -                               |
| GF0029187 | 1                             | 0                        | 0                            | Hypothetical protein (1)                                     |                                                                                                                                                                            |                                                                                                                                                                                                                                                                                                                                                                                                                                                                                                                                                                                                        | scaffold_4_mRNA_1640.1                     | -                           | -                               |
| GF0029186 | 1                             | 0                        | 0                            | Hypothetical protein (1)                                     |                                                                                                                                                                            |                                                                                                                                                                                                                                                                                                                                                                                                                                                                                                                                                                                                        | scaffold_4_mRNA_1639.1                     | -                           | -                               |
| GF0029185 | 1                             | 0                        | 0                            | Hypothetical protein (1)                                     |                                                                                                                                                                            |                                                                                                                                                                                                                                                                                                                                                                                                                                                                                                                                                                                                        | scaffold_4_mRNA_1637.1                     | -                           | -                               |
| GF0029184 | 1                             | 0                        | 0                            | Hypothetical protein (1)                                     |                                                                                                                                                                            |                                                                                                                                                                                                                                                                                                                                                                                                                                                                                                                                                                                                        | scaffold_4_mRNA_1635.1                     | -                           | -                               |
| GF0029183 | 1                             | 0                        | 0                            | Cytokinin riboside 5'-monophosphate phosphoribohydrolase (1) |                                                                                                                                                                            | LOG family [IPR031100] (1); Cytokinin riboside 5'-monophosphate phosphoribohydrolase LOG [IPR005269] (1)                                                                                                                                                                                                                                                                                                                                                                                                                                                                                               | scaffold_4_mRNA_1634.1                     | -                           | -                               |
| GF0029182 | 1                             | 0                        | 0                            | Hypothetical protein (1)                                     |                                                                                                                                                                            |                                                                                                                                                                                                                                                                                                                                                                                                                                                                                                                                                                                                        | scaffold_4_mRNA_1633.1                     | -                           | -                               |
| GF0029181 | 1                             | 0                        | 0                            | Hypothetical protein (1)                                     |                                                                                                                                                                            |                                                                                                                                                                                                                                                                                                                                                                                                                                                                                                                                                                                                        | scaffold_4_mRNA_1632.1                     | -                           | -                               |
| GF0029180 | 1                             | 0                        | 0                            | Hypothetical protein (1)                                     |                                                                                                                                                                            |                                                                                                                                                                                                                                                                                                                                                                                                                                                                                                                                                                                                        | scaffold_4_mRNA_1629.1                     | -                           | -                               |
| GF0029179 | 1                             | 0                        | 0                            | Hypothetical protein (1)                                     |                                                                                                                                                                            |                                                                                                                                                                                                                                                                                                                                                                                                                                                                                                                                                                                                        | scaffold_4_mRNA_1628.1                     | -                           | -                               |
| GF0029178 | 1                             | 0                        | 0                            | Cytokinin riboside 5'-monophosphate phosphoribohydrolase (1) |                                                                                                                                                                            |                                                                                                                                                                                                                                                                                                                                                                                                                                                                                                                                                                                                        | scaffold_4_mRNA_1627.1                     | -                           | -                               |
| GF0029177 | 1                             | 0                        | 0                            | Hypothetical protein (1)                                     | nucleic acid binding [GO:0003676 molecular_function] (1); zinc ion binding [GO:0008270 molecular_function] (1)                                                             | Zinc finger, CCHC-type [IPR001878] (1)                                                                                                                                                                                                                                                                                                                                                                                                                                                                                                                                                                 | scaffold_4_mRNA_1625.1                     | -                           | -                               |
| GF0029176 | 1                             | 0                        | 0                            | Hypothetical protein (1)                                     | nucleic acid binding [GO:0003676 molecular_function] (1)                                                                                                                   | Ribonuclease H-like domain [IPR012337] (1); Domain of unknown function DUF4283 [IPR025558] (1)                                                                                                                                                                                                                                                                                                                                                                                                                                                                                                         | scaffold_4_mRNA_1617.1                     | -                           | -                               |
| GF0029175 | 1                             | 0                        | 0                            | Hypothetical protein (1)                                     |                                                                                                                                                                            |                                                                                                                                                                                                                                                                                                                                                                                                                                                                                                                                                                                                        | scaffold_4_mRNA_1616.1                     | -                           | -                               |
| GF0029174 | 1                             | 0                        | 0                            | Hypothetical protein (1)                                     |                                                                                                                                                                            |                                                                                                                                                                                                                                                                                                                                                                                                                                                                                                                                                                                                        | scaffold_4_mRNA_1613.1                     | -                           | -                               |
| GF0029173 | 1                             | 0                        | 0                            | Hypothetical protein (1)                                     |                                                                                                                                                                            |                                                                                                                                                                                                                                                                                                                                                                                                                                                                                                                                                                                                        | scaffold_4_mRNA_1610.1                     | -                           | -                               |
| GF0029172 | 1                             | 0                        | 0                            | Hypothetical protein (1)                                     |                                                                                                                                                                            |                                                                                                                                                                                                                                                                                                                                                                                                                                                                                                                                                                                                        | scaffold_4_mRNA_1609.1                     | -                           | -                               |
| GF0029171 | 1                             | 0                        | 0                            | Hypothetical protein (1)                                     |                                                                                                                                                                            | Retrosposon gag domain [IPR005162] (1)                                                                                                                                                                                                                                                                                                                                                                                                                                                                                                                                                                 | scaffold_4_mRNA_1608.1                     | -                           | -                               |
| GF0029170 | 1                             | 0                        | 0                            | Hypothetical protein (1)                                     |                                                                                                                                                                            |                                                                                                                                                                                                                                                                                                                                                                                                                                                                                                                                                                                                        | scaffold_4_mRNA_1604.1                     | -                           | -                               |

| ID        | Num. in <i>C. clementiae</i> | Num. in <i>C. uchiha</i> | Num. in <i>P. trifoliata</i> | Note                                                                | GO                                                                                                                                                                                                                                                                                                                | InterPro                                                                                                                                                     | Members in <i>C. clementiae</i> | Members in <i>C. uchiha</i> | Members in <i>P. trifoliata</i> |
|-----------|------------------------------|--------------------------|------------------------------|---------------------------------------------------------------------|-------------------------------------------------------------------------------------------------------------------------------------------------------------------------------------------------------------------------------------------------------------------------------------------------------------------|--------------------------------------------------------------------------------------------------------------------------------------------------------------|---------------------------------|-----------------------------|---------------------------------|
| GF0029169 | 1                            | 0                        | 0                            | 0 Hypothetical protein (1)                                          | regulation of transcription, DNA-templated [GO:0006355 biological_process] (1)                                                                                                                                                                                                                                    | FHY3/FAR1 family [IPR031052] (1); FAR1 DNA binding domain [IPR064330] (1); Retrotransposon gag domain [IPR005162] (1)                                        | scaffold_4_mRNA_1589.1          | -                           | -                               |
| GF0029168 | 1                            | 0                        | 0                            | 0 Hypothetical protein (1)                                          |                                                                                                                                                                                                                                                                                                                   |                                                                                                                                                              | scaffold_4_mRNA_1569.1          | -                           | -                               |
| GF0029167 | 1                            | 0                        | 0                            | 0 Cytokinin riboside 5'-monophosphate phosphoribohydrolase (1)      |                                                                                                                                                                                                                                                                                                                   | LOG family [IPR031100] (1); Cytokinin riboside 5'-monophosphate phosphoribohydrolase LOG [IPR005269] (1)                                                     | scaffold_4_mRNA_1568.1          | -                           | -                               |
| GF0029166 | 1                            | 0                        | 0                            | 0 Cytokinin riboside 5'-monophosphate phosphoribohydrolase (1)      |                                                                                                                                                                                                                                                                                                                   | LOG family [IPR031100] (1)                                                                                                                                   | scaffold_4_mRNA_1552.1          | -                           | -                               |
| GF0029165 | 1                            | 0                        | 0                            | 0 Zinc knuckle family protein (1)                                   | zinc ion binding [GO:0008270 molecular_function] (1); nucleic acid binding [GO:0003676 molecular_function] (1)                                                                                                                                                                                                    | Zinc finger, CCHC-type [IPR001878] (1)                                                                                                                       | scaffold_4_mRNA_1550.1          | -                           | -                               |
| GF0029164 | 1                            | 0                        | 0                            | 0 Hypothetical protein (1)                                          |                                                                                                                                                                                                                                                                                                                   | Domain of unknown function DUF4219 [IPR025314] (1)                                                                                                           | scaffold_4_mRNA_1549.1          | -                           | -                               |
| GF0029163 | 1                            | 0                        | 0                            | 0 Cytokinin riboside 5'-monophosphate phosphoribohydrolase (1)      |                                                                                                                                                                                                                                                                                                                   | LOG family [IPR031100] (1)                                                                                                                                   | scaffold_4_mRNA_1544.1          | -                           | -                               |
| GF0029162 | 1                            | 0                        | 0                            | 0 Cytokinin riboside 5'-monophosphate phosphoribohydrolase (1)      |                                                                                                                                                                                                                                                                                                                   | LOG family [IPR031100] (1)                                                                                                                                   | scaffold_4_mRNA_1505.1          | -                           | -                               |
| GF0029161 | 1                            | 0                        | 0                            | 0 Hypothetical protein (1)                                          |                                                                                                                                                                                                                                                                                                                   |                                                                                                                                                              | scaffold_4_mRNA_1504.1          | -                           | -                               |
| GF0029160 | 1                            | 0                        | 0                            | 0 Hypothetical protein (1)                                          |                                                                                                                                                                                                                                                                                                                   |                                                                                                                                                              | scaffold_4_mRNA_1498.1          | -                           | -                               |
| GF0029159 | 1                            | 0                        | 0                            | 0 Cytokinin riboside 5'-monophosphate phosphoribohydrolase (1)      |                                                                                                                                                                                                                                                                                                                   | LOG family [IPR031100] (1)                                                                                                                                   | scaffold_4_mRNA_1497.1          | -                           | -                               |
| GF0029158 | 1                            | 0                        | 0                            | 0 Hypothetical protein (1)                                          |                                                                                                                                                                                                                                                                                                                   |                                                                                                                                                              | scaffold_4_mRNA_1495.1          | -                           | -                               |
| GF0029157 | 1                            | 0                        | 0                            | 0 Hypothetical protein (1)                                          |                                                                                                                                                                                                                                                                                                                   | LOG family [IPR031100] (1)                                                                                                                                   | scaffold_4_mRNA_1494.1          | -                           | -                               |
| GF0029156 | 1                            | 0                        | 0                            | 0 Hypothetical protein (1)                                          |                                                                                                                                                                                                                                                                                                                   |                                                                                                                                                              | scaffold_4_mRNA_1493.1          | -                           | -                               |
| GF0029155 | 1                            | 0                        | 0                            | 0 Hypothetical protein (1)                                          |                                                                                                                                                                                                                                                                                                                   |                                                                                                                                                              | scaffold_4_mRNA_1492.1          | -                           | -                               |
| GF0029154 | 1                            | 0                        | 0                            | 0 Cytokinin riboside 5'-monophosphate phosphoribohydrolase LOG7 (1) |                                                                                                                                                                                                                                                                                                                   | LOG family [IPR031100] (1); Cytokinin riboside 5'-monophosphate phosphoribohydrolase LOG [IPR005269] (1)                                                     | scaffold_4_mRNA_1491.1          | -                           | -                               |
| GF0029153 | 1                            | 0                        | 0                            | 0 Alpha.alpha-trehalase (1)                                         | trehalose metabolic process [GO:0005991 biological_process] (1); catalytic activity [GO:0003524 molecular_function] (1); alpha.alpha-trehalase activity [GO:0004555 molecular_function] (1)                                                                                                                       | Glycoside hydrolase, family 37 [IPR001661] (1); Glycoside hydrolase, family 37, conserved site [IPR018232] (1); Six-hairpin glycosidase-like [IPR008928] (1) | scaffold_4_mRNA_1479.1          | -                           | -                               |
| GF0029152 | 1                            | 0                        | 0                            | 0 Hypothetical protein (1)                                          |                                                                                                                                                                                                                                                                                                                   |                                                                                                                                                              | scaffold_4_mRNA_1471.1          | -                           | -                               |
| GF0029151 | 1                            | 0                        | 0                            | 0 Hypothetical protein (1)                                          |                                                                                                                                                                                                                                                                                                                   |                                                                                                                                                              | scaffold_4_mRNA_1453.1          | -                           | -                               |
| GF0029150 | 1                            | 0                        | 0                            | 0 Hypothetical protein (1)                                          | regulation of transcription, DNA-templated [GO:0006355 biological_process] (1)                                                                                                                                                                                                                                    | FHY3/FAR1 family [IPR031052] (1); MULE transposase domain [IPR018289] (1)                                                                                    | scaffold_4_mRNA_1433.1          | -                           | -                               |
| GF0029149 | 1                            | 0                        | 0                            | 0 Hypothetical protein (1)                                          |                                                                                                                                                                                                                                                                                                                   |                                                                                                                                                              | scaffold_4_mRNA_1416.1          | -                           | -                               |
| GF0029148 | 1                            | 0                        | 0                            | 0 Hypothetical protein (1)                                          |                                                                                                                                                                                                                                                                                                                   | Transposase-associated domain [IPR029480] (1)                                                                                                                | scaffold_4_mRNA_141.1           | -                           | -                               |
| GF0029147 | 1                            | 0                        | 0                            | 0 Hypothetical protein (1)                                          |                                                                                                                                                                                                                                                                                                                   |                                                                                                                                                              | scaffold_4_mRNA_1401.1          | -                           | -                               |
| GF0029146 | 1                            | 0                        | 0                            | 0 Hypothetical protein (1)                                          |                                                                                                                                                                                                                                                                                                                   |                                                                                                                                                              | scaffold_4_mRNA_14.1            | -                           | -                               |
| GF0029145 | 1                            | 0                        | 0                            | 0 Putative RNA-directed DNA polymerase (1)                          |                                                                                                                                                                                                                                                                                                                   |                                                                                                                                                              | scaffold_4_mRNA_1397.1          | -                           | -                               |
| GF0029144 | 1                            | 0                        | 0                            | 0 Cytokinin riboside 5'-monophosphate phosphoribohydrolase (1)      |                                                                                                                                                                                                                                                                                                                   | LOG family [IPR031100] (1)                                                                                                                                   | scaffold_4_mRNA_1385.1          | -                           | -                               |
| GF0029143 | 1                            | 0                        | 0                            | 0 Retrotransposon protein, putative, unclassified (1)               |                                                                                                                                                                                                                                                                                                                   |                                                                                                                                                              | scaffold_4_mRNA_1381.1          | -                           | -                               |
| GF0029142 | 1                            | 0                        | 0                            | 0 Hypothetical protein (1)                                          | nucleic acid binding [GO:0003676 molecular_function] (1)                                                                                                                                                                                                                                                          | Ribonuclease H-like domain [IPR012337] (1)                                                                                                                   | scaffold_4_mRNA_1375.1          | -                           | -                               |
| GF0029141 | 1                            | 0                        | 0                            | 0 Hypothetical protein (1)                                          |                                                                                                                                                                                                                                                                                                                   |                                                                                                                                                              | scaffold_4_mRNA_1373.1          | -                           | -                               |
| GF0029140 | 1                            | 0                        | 0                            | 0 Hypothetical protein (1)                                          | oxidation-reduction process [GO:0005114 biological_process] (1); oxidoreductase activity, acting on paired donors, with incorporation or reduction of molecular oxygen [GO:0016705 molecular_function] (1); heme binding [GO:0020037 molecular_function] (1); non ion binding [GO:0005506 molecular_function] (1) | Cytochrome P450 [IPR001128] (1); Cytochrome P450, E-class, group 1 [IPR002401] (1)                                                                           | scaffold_4_mRNA_1372.1          | -                           | -                               |
| GF0029139 | 1                            | 0                        | 0                            | 0 Hypothetical protein (1)                                          |                                                                                                                                                                                                                                                                                                                   | LOG family [IPR031100] (1)                                                                                                                                   | scaffold_4_mRNA_1371.1          | -                           | -                               |
| GF0029138 | 1                            | 0                        | 0                            | 0 Hypothetical protein (1)                                          |                                                                                                                                                                                                                                                                                                                   |                                                                                                                                                              | scaffold_4_mRNA_1367.1          | -                           | -                               |
| GF0029137 | 1                            | 0                        | 0                            | 0 Hypothetical protein (1)                                          |                                                                                                                                                                                                                                                                                                                   |                                                                                                                                                              | scaffold_4_mRNA_1356.1          | -                           | -                               |
| GF0029136 | 1                            | 0                        | 0                            | 0 Hypothetical protein (1)                                          |                                                                                                                                                                                                                                                                                                                   | Aspartic peptidase domain [IPR021109] (1)                                                                                                                    | scaffold_4_mRNA_1355.1          | -                           | -                               |
| GF0029135 | 1                            | 0                        | 0                            | 0 Cytokinin riboside 5'-monophosphate phosphoribohydrolase (1)      |                                                                                                                                                                                                                                                                                                                   | LOG family [IPR031100] (1)                                                                                                                                   | scaffold_4_mRNA_1354.1          | -                           | -                               |
| GF0029134 | 1                            | 0                        | 0                            | 0 Hypothetical protein (1)                                          |                                                                                                                                                                                                                                                                                                                   |                                                                                                                                                              | scaffold_4_mRNA_1353.1          | -                           | -                               |
| GF0029133 | 1                            | 0                        | 0                            | 0 Hypothetical protein (1)                                          |                                                                                                                                                                                                                                                                                                                   |                                                                                                                                                              | scaffold_4_mRNA_1350.1          | -                           | -                               |
| GF0029132 | 1                            | 0                        | 0                            | 0 Hypothetical protein (1)                                          |                                                                                                                                                                                                                                                                                                                   |                                                                                                                                                              | scaffold_4_mRNA_1349.1          | -                           | -                               |
| GF0029131 | 1                            | 0                        | 0                            | 0 Hypothetical protein (1)                                          |                                                                                                                                                                                                                                                                                                                   |                                                                                                                                                              | scaffold_4_mRNA_1341.1          | -                           | -                               |
| GF0029130 | 1                            | 0                        | 0                            | 0 Hypothetical protein (1)                                          |                                                                                                                                                                                                                                                                                                                   |                                                                                                                                                              | scaffold_4_mRNA_1331.1          | -                           | -                               |
| GF0029129 | 1                            | 0                        | 0                            | 0 Hypothetical protein (1)                                          |                                                                                                                                                                                                                                                                                                                   |                                                                                                                                                              | scaffold_4_mRNA_1330.1          | -                           | -                               |
| GF0029128 | 1                            | 0                        | 0                            | 0 Hypothetical protein (1)                                          |                                                                                                                                                                                                                                                                                                                   |                                                                                                                                                              | scaffold_4_mRNA_1327.1          | -                           | -                               |
| GF0029127 | 1                            | 0                        | 0                            | 0 Transposase (1)                                                   |                                                                                                                                                                                                                                                                                                                   | Domain of unknown function DUF4218 [IPR025452] (1)                                                                                                           | scaffold_4_mRNA_1326.1          | -                           | -                               |
| GF0029126 | 1                            | 0                        | 0                            | 0 Hypothetical protein (1)                                          |                                                                                                                                                                                                                                                                                                                   |                                                                                                                                                              | scaffold_4_mRNA_1325.1          | -                           | -                               |
| GF0029125 | 1                            | 0                        | 0                            | 0 Cytokinin riboside 5'-monophosphate phosphoribohydrolase (1)      |                                                                                                                                                                                                                                                                                                                   | LOG family [IPR031100] (1); Cytokinin riboside 5'-monophosphate phosphoribohydrolase LOG [IPR005269] (1)                                                     | scaffold_4_mRNA_1324.1          | -                           | -                               |
| GF0029124 | 1                            | 0                        | 0                            | 0 Hypothetical protein (1)                                          |                                                                                                                                                                                                                                                                                                                   |                                                                                                                                                              | scaffold_4_mRNA_1322.1          | -                           | -                               |
| GF0029123 | 1                            | 0                        | 0                            | 0 Hypothetical protein (1)                                          |                                                                                                                                                                                                                                                                                                                   |                                                                                                                                                              | scaffold_4_mRNA_1317.1          | -                           | -                               |
| GF0029122 | 1                            | 0                        | 0                            | 0 Hypothetical protein (1)                                          |                                                                                                                                                                                                                                                                                                                   |                                                                                                                                                              | scaffold_4_mRNA_1315.1          | -                           | -                               |
| GF0029121 | 1                            | 0                        | 0                            | 0 Hypothetical protein (1)                                          |                                                                                                                                                                                                                                                                                                                   |                                                                                                                                                              | scaffold_4_mRNA_1314.1          | -                           | -                               |
| GF0029120 | 1                            | 0                        | 0                            | 0 Hypothetical protein (1)                                          |                                                                                                                                                                                                                                                                                                                   |                                                                                                                                                              | scaffold_4_mRNA_1310.1          | -                           | -                               |
| GF0029119 | 1                            | 0                        | 0                            | 0 Hypothetical protein (1)                                          |                                                                                                                                                                                                                                                                                                                   |                                                                                                                                                              | scaffold_4_mRNA_1309.1          | -                           | -                               |
| GF0029118 | 1                            | 0                        | 0                            | 0 Hypothetical protein (1)                                          |                                                                                                                                                                                                                                                                                                                   |                                                                                                                                                              | scaffold_4_mRNA_1307.1          | -                           | -                               |
| GF0029117 | 1                            | 0                        | 0                            | 0 Hypothetical protein (1)                                          |                                                                                                                                                                                                                                                                                                                   |                                                                                                                                                              | scaffold_4_mRNA_1306.1          | -                           | -                               |
| GF0029116 | 1                            | 0                        | 0                            | 0 Hypothetical protein (1)                                          |                                                                                                                                                                                                                                                                                                                   |                                                                                                                                                              | scaffold_4_mRNA_1305.1          | -                           | -                               |
| GF0029115 | 1                            | 0                        | 0                            | 0 Hypothetical protein (1)                                          |                                                                                                                                                                                                                                                                                                                   |                                                                                                                                                              | scaffold_4_mRNA_1301.1          | -                           | -                               |
| GF0029114 | 1                            | 0                        | 0                            | 0 PLATZ transcription factor family protein (1)                     | intracellular [GO:0005622 cellular_component] (1); zinc ion binding [GO:0008270 molecular_function] (1)                                                                                                                                                                                                           | Protein of unknown function DUF597 [IPR006734] (1); B-box-type zinc finger [IPR000315] (1)                                                                   | scaffold_4_mRNA_1298.1          | -                           | -                               |
| GF0029113 | 1                            | 0                        | 0                            | 0 Hypothetical protein (1)                                          |                                                                                                                                                                                                                                                                                                                   |                                                                                                                                                              | scaffold_4_mRNA_1296.1          | -                           | -                               |
| GF0029112 | 1                            | 0                        | 0                            | 0 Hypothetical protein (1)                                          |                                                                                                                                                                                                                                                                                                                   |                                                                                                                                                              | scaffold_4_mRNA_1291.1          | -                           | -                               |
| GF0029111 | 1                            | 0                        | 0                            | 0 Hypothetical protein (1)                                          | nucleic acid binding [GO:0003676 molecular_function] (1); DNA integration [GO:0015074 biological_process] (1)                                                                                                                                                                                                     | Aspartic peptidase domain [IPR021109] (1); Integrase, catalytic core [IPR001584] (1); Ribonuclease H-like domain [IPR012337] (1)                             | scaffold_4_mRNA_1290.1          | -                           | -                               |
| GF0029110 | 1                            | 0                        | 0                            | 0 Hypothetical protein (1)                                          |                                                                                                                                                                                                                                                                                                                   |                                                                                                                                                              | scaffold_4_mRNA_129.1           | -                           | -                               |
| GF0029109 | 1                            | 0                        | 0                            | 0 Hypothetical protein (1)                                          |                                                                                                                                                                                                                                                                                                                   |                                                                                                                                                              | scaffold_4_mRNA_1287.1          | -                           | -                               |
| GF0029108 | 1                            | 0                        | 0                            | 0 Hypothetical protein (1)                                          |                                                                                                                                                                                                                                                                                                                   | Protein-tyrosine phosphatase-like [IPR029021] (1); Aspartic peptidase domain [IPR021109] (1); Myotubularin-like phosphatase domain [IPR010569] (1)           | scaffold_4_mRNA_1286.1          | -                           | -                               |
| GF0029107 | 1                            | 0                        | 0                            | 0 Hypothetical protein (1)                                          |                                                                                                                                                                                                                                                                                                                   | Retrotransposon gag domain [IPR005162] (1)                                                                                                                   | scaffold_4_mRNA_1285.1          | -                           | -                               |
| GF0029106 | 1                            | 0                        | 0                            | 0 RNA-directed DNA polymerase (1)                                   | DNA integration [GO:0015074 biological_process] (1); nucleic acid binding [GO:0003676 molecular_function] (1)                                                                                                                                                                                                     | Ribonuclease H-like domain [IPR012337] (1); Integrase, catalytic core [IPR001584] (1)                                                                        | scaffold_4_mRNA_1282.1          | -                           | -                               |
| GF0029105 | 1                            | 0                        | 0                            | 0 Hypothetical protein (1)                                          |                                                                                                                                                                                                                                                                                                                   |                                                                                                                                                              | scaffold_4_mRNA_1281.1          | -                           | -                               |
| GF0029104 | 1                            | 0                        | 0                            | 0 Hypothetical protein (1)                                          |                                                                                                                                                                                                                                                                                                                   | Aspartate/glutamate/uridylylate kinase [IPR010488] (1)                                                                                                       | scaffold_4_mRNA_1280.1          | -                           | -                               |
| GF0029103 | 1                            | 0                        | 0                            | 0 Hypothetical protein (1)                                          | RNA-DNA hybrid ribonuclease activity [GO:0004523 molecular_function] (1); nucleic acid binding [GO:0003676 molecular_function] (1)                                                                                                                                                                                | Ribonuclease H-like domain [IPR012337] (1); Ribonuclease H domain [IPR002156] (1)                                                                            | scaffold_4_mRNA_1275.1          | -                           | -                               |
| GF0029102 | 1                            | 0                        | 0                            | 0 Hypothetical protein (1)                                          |                                                                                                                                                                                                                                                                                                                   |                                                                                                                                                              | scaffold_4_mRNA_1273.1          | -                           | -                               |
| GF0029101 | 1                            | 0                        | 0                            | 0 Hypothetical protein (1)                                          |                                                                                                                                                                                                                                                                                                                   | Aspartate/glutamate/uridylylate kinase [IPR010488] (1)                                                                                                       | scaffold_4_mRNA_1271.1          | -                           | -                               |
| GF0029100 | 1                            | 0                        | 0                            | 0 Hypothetical protein (1)                                          |                                                                                                                                                                                                                                                                                                                   |                                                                                                                                                              | scaffold_4_mRNA_1268.1          | -                           | -                               |
| GF0029099 | 1                            | 0                        | 0                            | 0 Hypothetical protein (1)                                          |                                                                                                                                                                                                                                                                                                                   |                                                                                                                                                              | scaffold_4_mRNA_1266.1          | -                           | -                               |
| GF0029098 | 1                            | 0                        | 0                            | 0 Hypothetical protein (1)                                          |                                                                                                                                                                                                                                                                                                                   | Aspartate/glutamate/uridylylate kinase [IPR010488] (1)                                                                                                       | scaffold_4_mRNA_1265.1          | -                           | -                               |
| GF0029097 | 1                            | 0                        | 0                            | 0 Strictosidine synthase family protein (1)                         | biosynthetic process [GO:0009058 biological_process] (1); strictosidine synthase activity [GO:0010484 molecular_function] (1)                                                                                                                                                                                     | Six-bladed beta-propeller, TollB-like [IPR011042] (1); Strictosidine synthase [IPR004141] (1); Strictosidine synthase, conserved region [IPR018119] (1)      | scaffold_4_mRNA_1264.1          | -                           | -                               |

| ID        | Num. in <i>C. clementinae</i> | Num. in <i>C. uashba</i> | Num. in <i>P. trifoliata</i> | Note | GO                                                           | InterPro                                                                                                                                                                                   | Members in <i>C. clementinae</i>                                                                                                                                                                         | Members in <i>C. uashba</i> | Members in <i>P. trifoliata</i> |
|-----------|-------------------------------|--------------------------|------------------------------|------|--------------------------------------------------------------|--------------------------------------------------------------------------------------------------------------------------------------------------------------------------------------------|----------------------------------------------------------------------------------------------------------------------------------------------------------------------------------------------------------|-----------------------------|---------------------------------|
| GF0029096 | 1                             | 0                        | 0                            | 0    | Retrovirus-related Pol polyprotein from transposon 412 (1)   | nucleic acid binding [GO:0003676 molecular_function] (1); RNA-DNA hybrid ribonuclease activity [GO:0004523 molecular_function] (1)                                                         | Ribonuclease H-like domain [IPRO12337] (1); Ribonuclease H domain scaffold_4_mRNA_1262.1 [IPRO02156] (1)                                                                                                 | -                           | -                               |
| GF0029095 | 1                             | 0                        | 0                            | 0    | Hypothetical protein (1)                                     | phosphatase activity [GO:0016791 molecular_function] (1); dephosphorylation [GO:0016311 biological_process] (1); protein tyrosine phosphatase activity [GO:0004725 molecular_function] (1) | Protein-tyrosine phosphatase, active site [IPRO116130] (1); Myotubularin-like phosphatase domain [IPRO10569] (1); Myotubularin family [IPRO30564] (1); Protein-tyrosine phosphatase-like [IPRO29021] (1) | scaffold_4_mRNA_1260.1      | -                               |
| GF0029094 | 1                             | 0                        | 0                            | 0    | Hypothetical protein (1)                                     | RNA-DNA hybrid ribonuclease activity [GO:0004523 molecular_function] (1); nucleic acid binding [GO:0003676 molecular_function] (1)                                                         | Ribonuclease H-like domain [IPRO12337] (1); Ribonuclease H domain scaffold_4_mRNA_1251.1 [IPRO02156] (1)                                                                                                 | -                           | -                               |
| GF0029093 | 1                             | 0                        | 0                            | 0    | Hypothetical protein (1)                                     | Aspartate/glutamate/uridylyl-kinase [IPRO01048] (1)                                                                                                                                        | scaffold_4_mRNA_1249.1                                                                                                                                                                                   | -                           | -                               |
| GF0029092 | 1                             | 0                        | 0                            | 0    | Hypothetical protein (1)                                     | strictosidine synthase activity [GO:0014844 molecular_function] (1); biosynthetic process [GO:0009058 biological_process] (1)                                                              | Six-bladed beta-propeller, TollB-like [IPRO11042] (1); Strictosidine synthase [IPRO04141] (1); Strictosidine synthase, conserved region [IPRO18119] (1)                                                  | scaffold_4_mRNA_1247.1      | -                               |
| GF0029091 | 1                             | 0                        | 0                            | 0    | Putative strictosidine synthase (1)                          | Protein-tyrosine phosphatase-like [IPRO29021] (1); Myotubularin family [IPRO30564] (1); Myotubularin-like phosphatase domain [IPRO10569] (1)                                               | scaffold_4_mRNA_1241.1                                                                                                                                                                                   | -                           | -                               |
| GF0029090 | 1                             | 0                        | 0                            | 0    | Hypothetical protein (1)                                     | Myotubularin-like phosphatase domain [IPRO10569] (1)                                                                                                                                       | scaffold_4_mRNA_1240.1                                                                                                                                                                                   | -                           | -                               |
| GF0029089 | 1                             | 0                        | 0                            | 0    | Hypothetical protein (1)                                     | Myotubularin-like phosphatase domain [IPRO10569] (1)                                                                                                                                       | scaffold_4_mRNA_1239.1                                                                                                                                                                                   | -                           | -                               |
| GF0029088 | 1                             | 0                        | 0                            | 0    | Hypothetical protein (1)                                     | scaffold_4_mRNA_1236.1                                                                                                                                                                     | -                                                                                                                                                                                                        | -                           |                                 |
| GF0029087 | 1                             | 0                        | 0                            | 0    | Hypothetical protein (1)                                     | scaffold_4_mRNA_1228.1                                                                                                                                                                     | -                                                                                                                                                                                                        | -                           |                                 |
| GF0029086 | 1                             | 0                        | 0                            | 0    | Hypothetical protein (1)                                     | scaffold_4_mRNA_1227.1                                                                                                                                                                     | -                                                                                                                                                                                                        | -                           |                                 |
| GF0029085 | 1                             | 0                        | 0                            | 0    | Hypothetical protein (1)                                     | scaffold_4_mRNA_1227.1                                                                                                                                                                     | -                                                                                                                                                                                                        | -                           |                                 |
| GF0029084 | 1                             | 0                        | 0                            | 0    | Putative methyltransferase PMT20 (1)                         | methyltransferase activity [GO:0008168 molecular_function] (1)                                                                                                                             | Putative S-adenosyl-L-methionine-dependent methyltransferase [IPRO04159] (1); S-adenosyl-L-methionine-dependent methyltransferase [IPRO29063] (1)                                                        | scaffold_4_mRNA_1225.1      | -                               |
| GF0029083 | 1                             | 0                        | 0                            | 0    | Hypothetical protein (1)                                     | nucleic acid binding [GO:0003676 molecular_function] (1)                                                                                                                                   | Zinc finger C2H2-type [IPRO13087] (1); Zinc finger, RING/FYVE/PHD-type [IPRO13083] (1)                                                                                                                   | scaffold_4_mRNA_1224.1      | -                               |
| GF0029082 | 1                             | 0                        | 0                            | 0    | Hypothetical protein (1)                                     | scaffold_4_mRNA_1223.1                                                                                                                                                                     | -                                                                                                                                                                                                        | -                           |                                 |
| GF0029081 | 1                             | 0                        | 0                            | 0    | Hypothetical protein (1)                                     | scaffold_4_mRNA_1222.1                                                                                                                                                                     | -                                                                                                                                                                                                        | -                           |                                 |
| GF0029080 | 1                             | 0                        | 0                            | 0    | Hypothetical protein (1)                                     | scaffold_4_mRNA_1221.1                                                                                                                                                                     | -                                                                                                                                                                                                        | -                           |                                 |
| GF0029079 | 1                             | 0                        | 0                            | 0    | Hypothetical protein (1)                                     | scaffold_4_mRNA_1213.1                                                                                                                                                                     | -                                                                                                                                                                                                        | -                           |                                 |
| GF0029078 | 1                             | 0                        | 0                            | 0    | Hypothetical protein (1)                                     | scaffold_4_mRNA_1204.1                                                                                                                                                                     | -                                                                                                                                                                                                        | -                           |                                 |
| GF0029077 | 1                             | 0                        | 0                            | 0    | Hypothetical protein (1)                                     | scaffold_4_mRNA_1201.1                                                                                                                                                                     | -                                                                                                                                                                                                        | -                           |                                 |
| GF0029076 | 1                             | 0                        | 0                            | 0    | Hypothetical protein (1)                                     | Retrotransposon gag domain [IPRO05162] (1)                                                                                                                                                 | scaffold_4_mRNA_1195.1                                                                                                                                                                                   | -                           | -                               |
| GF0029075 | 1                             | 0                        | 0                            | 0    | Hypothetical protein (1)                                     | scaffold_4_mRNA_1185.1                                                                                                                                                                     | -                                                                                                                                                                                                        | -                           |                                 |
| GF0029074 | 1                             | 0                        | 0                            | 0    | Hypothetical protein (1)                                     | scaffold_4_mRNA_1177.1                                                                                                                                                                     | -                                                                                                                                                                                                        | -                           |                                 |
| GF0029073 | 1                             | 0                        | 0                            | 0    | Hypothetical protein (1)                                     | Prolamin-like domain [IPRO08502] (1)                                                                                                                                                       | scaffold_4_mRNA_1176.1                                                                                                                                                                                   | -                           | -                               |
| GF0029072 | 1                             | 0                        | 0                            | 0    | Hypothetical protein (1)                                     | HAT, C-terminal dimerization domain [IPRO08996] (1); Ribonuclease H-like domain [IPRO12337] (1)                                                                                            | scaffold_4_mRNA_1162.1                                                                                                                                                                                   | -                           | -                               |
| GF0029071 | 1                             | 0                        | 0                            | 0    | Hypothetical protein (1)                                     | scaffold_4_mRNA_1159.1                                                                                                                                                                     | -                                                                                                                                                                                                        | -                           |                                 |
| GF0029070 | 1                             | 0                        | 0                            | 0    | Hypothetical protein (1)                                     | scaffold_4_mRNA_1158.1                                                                                                                                                                     | -                                                                                                                                                                                                        | -                           |                                 |
| GF0029069 | 1                             | 0                        | 0                            | 0    | Putative Aldha retroelement ORF1 protein (1)                 | Retrotransposon gag domain [IPRO05162] (1)                                                                                                                                                 | scaffold_4_mRNA_1156.1                                                                                                                                                                                   | -                           | -                               |
| GF0029068 | 1                             | 0                        | 0                            | 0    | Hypothetical protein (1)                                     | scaffold_4_mRNA_1143.1                                                                                                                                                                     | -                                                                                                                                                                                                        | -                           |                                 |
| GF0029067 | 1                             | 0                        | 0                            | 0    | Hypothetical protein (1)                                     | scaffold_4_mRNA_1133.1                                                                                                                                                                     | -                                                                                                                                                                                                        | -                           |                                 |
| GF0029066 | 1                             | 0                        | 0                            | 0    | Hypothetical protein (1)                                     | scaffold_4_mRNA_1132.1                                                                                                                                                                     | -                                                                                                                                                                                                        | -                           |                                 |
| GF0029065 | 1                             | 0                        | 0                            | 0    | Hypothetical protein (1)                                     | nucleic acid binding [GO:0003676 molecular_function] (1); RNA binding [GO:0003723 molecular_function] (1); ribonuclease T2 activity [GO:0033897 molecular_function] (1)                    | Ribonuclease H-like domain [IPRO12337] (1); Ribonuclease T2-like [IPRO01568] (1)                                                                                                                         | scaffold_4_mRNA_1131.1      | -                               |
| GF0029064 | 1                             | 0                        | 0                            | 0    | Hypothetical protein (1)                                     | scaffold_4_mRNA_1130.1                                                                                                                                                                     | -                                                                                                                                                                                                        | -                           |                                 |
| GF0029063 | 1                             | 0                        | 0                            | 0    | Hypothetical protein (1)                                     | scaffold_4_mRNA_1129.1                                                                                                                                                                     | -                                                                                                                                                                                                        | -                           |                                 |
| GF0029062 | 1                             | 0                        | 0                            | 0    | Hypothetical protein (1)                                     | scaffold_4_mRNA_1126.1                                                                                                                                                                     | -                                                                                                                                                                                                        | -                           |                                 |
| GF0029061 | 1                             | 0                        | 0                            | 0    | Hypothetical protein (1)                                     | scaffold_4_mRNA_1125.1                                                                                                                                                                     | -                                                                                                                                                                                                        | -                           |                                 |
| GF0029060 | 1                             | 0                        | 0                            | 0    | Hypothetical protein (1)                                     | scaffold_4_mRNA_1123.1                                                                                                                                                                     | -                                                                                                                                                                                                        | -                           |                                 |
| GF0029059 | 1                             | 0                        | 0                            | 0    | Hypothetical protein (1)                                     | scaffold_4_mRNA_1120.1                                                                                                                                                                     | -                                                                                                                                                                                                        | -                           |                                 |
| GF0029058 | 1                             | 0                        | 0                            | 0    | Hypothetical protein (1)                                     | scaffold_4_mRNA_1112.1                                                                                                                                                                     | -                                                                                                                                                                                                        | -                           |                                 |
| GF0029057 | 1                             | 0                        | 0                            | 0    | Cytokinin riboside 5'-monophosphate phosphoribohydrolase (1) | LOG family [IPRO31100] (1); Cytokinin riboside 5'-monophosphate phosphoribohydrolase LOG [IPRO05269] (1)                                                                                   | scaffold_4_mRNA_1111.1                                                                                                                                                                                   | -                           | -                               |
| GF0029056 | 1                             | 0                        | 0                            | 0    | Hypothetical protein (1)                                     | scaffold_4_mRNA_1108.1                                                                                                                                                                     | -                                                                                                                                                                                                        | -                           |                                 |
| GF0029055 | 1                             | 0                        | 0                            | 0    | Hypothetical protein (1)                                     | scaffold_4_mRNA_1107.1                                                                                                                                                                     | -                                                                                                                                                                                                        | -                           |                                 |
| GF0029054 | 1                             | 0                        | 0                            | 0    | Hypothetical protein (1)                                     | Transposase, Tnp1/En/Spm-like [IPRO02954] (1)                                                                                                                                              | scaffold_4_mRNA_1104.1                                                                                                                                                                                   | -                           | -                               |
| GF0029053 | 1                             | 0                        | 0                            | 0    | Hypothetical protein (1)                                     | Aspartic peptidase domain [IPRO21109] (1)                                                                                                                                                  | scaffold_4_mRNA_1101.1                                                                                                                                                                                   | -                           | -                               |
| GF0029052 | 1                             | 0                        | 0                            | 0    | Hypothetical protein (1)                                     | ATP binding [GO:0005524 molecular_function] (1); protein phosphorylation [GO:0006468 biological_process] (1); protein kinase activity [GO:0004672 molecular_function] (1)                  | Protein kinase-like domain [IPRO11009] (1); Protein kinase domain [IPRO00719] (1); Serine/threonine-protein kinase, active site [IPRO08271] (1)                                                          | scaffold_4_mRNA_1095.1      | -                               |
| GF0029051 | 1                             | 0                        | 0                            | 0    | Hypothetical protein (1)                                     | scaffold_4_mRNA_1093.1                                                                                                                                                                     | -                                                                                                                                                                                                        | -                           |                                 |
| GF0029050 | 1                             | 0                        | 0                            | 0    | Hypothetical protein (1)                                     | scaffold_4_mRNA_1092.1                                                                                                                                                                     | -                                                                                                                                                                                                        | -                           |                                 |
| GF0029049 | 1                             | 0                        | 0                            | 0    | Hypothetical protein (1)                                     | scaffold_4_mRNA_1089.1                                                                                                                                                                     | -                                                                                                                                                                                                        | -                           |                                 |
| GF0029048 | 1                             | 0                        | 0                            | 0    | Cytokinin riboside 5'-monophosphate phosphoribohydrolase (1) | LOG family [IPRO31100] (1)                                                                                                                                                                 | scaffold_4_mRNA_1088.1                                                                                                                                                                                   | -                           | -                               |
| GF0029047 | 1                             | 0                        | 0                            | 0    | Hypothetical protein (1)                                     | nucleic acid binding [GO:0003676 molecular_function] (1); regulation of transcription, DNA-templated [GO:0006355 biological_process] (1)                                                   | Carbavirus nucleic acid-binding protein [IPRO02568] (1)                                                                                                                                                  | scaffold_4_mRNA_1087.1      | -                               |
| GF0029046 | 1                             | 0                        | 0                            | 0    | Hypothetical protein (1)                                     | Gag-polypeptide of LTR copia-type [IPRO29472] (1)                                                                                                                                          | scaffold_4_mRNA_1080.1                                                                                                                                                                                   | -                           | -                               |
| GF0029045 | 1                             | 0                        | 0                            | 0    | Hypothetical protein (1)                                     | scaffold_4_mRNA_1075.1                                                                                                                                                                     | -                                                                                                                                                                                                        | -                           |                                 |
| GF0029044 | 1                             | 0                        | 0                            | 0    | Hypothetical protein (1)                                     | scaffold_4_mRNA_1070.1                                                                                                                                                                     | -                                                                                                                                                                                                        | -                           |                                 |
| GF0029043 | 1                             | 0                        | 0                            | 0    | Hypothetical protein (1)                                     | scaffold_4_mRNA_1063.1                                                                                                                                                                     | -                                                                                                                                                                                                        | -                           |                                 |
| GF0029042 | 1                             | 0                        | 0                            | 0    | Hypothetical protein (1)                                     | nucleic acid binding [GO:0003676 molecular_function] (1)                                                                                                                                   | Ribonuclease H-like domain [IPRO12337] (1); GAG-pre-integrase domain [IPRO25724] (1)                                                                                                                     | scaffold_4_mRNA_1052.1      | -                               |
| GF0029041 | 1                             | 0                        | 0                            | 0    | Hypothetical protein (1)                                     | Gag-polypeptide of LTR copia-type [IPRO29472] (1)                                                                                                                                          | scaffold_4_mRNA_1051.1                                                                                                                                                                                   | -                           | -                               |
| GF0029040 | 1                             | 0                        | 0                            | 0    | Hypothetical protein (1)                                     | scaffold_4_mRNA_1050.1                                                                                                                                                                     | -                                                                                                                                                                                                        | -                           |                                 |
| GF0029039 | 1                             | 0                        | 0                            | 0    | Hypothetical protein (1)                                     | scaffold_4_mRNA_1048.1                                                                                                                                                                     | -                                                                                                                                                                                                        | -                           |                                 |
| GF0029038 | 1                             | 0                        | 0                            | 0    | Hypothetical protein (1)                                     | scaffold_4_mRNA_1024.1                                                                                                                                                                     | -                                                                                                                                                                                                        | -                           |                                 |
| GF0029037 | 1                             | 0                        | 0                            | 0    | Hypothetical protein (1)                                     | scaffold_4_mRNA_1013.1                                                                                                                                                                     | -                                                                                                                                                                                                        | -                           |                                 |
| GF0029036 | 1                             | 0                        | 0                            | 0    | Hypothetical protein (1)                                     | scaffold_4_mRNA_1002.1                                                                                                                                                                     | -                                                                                                                                                                                                        | -                           |                                 |
| GF0029035 | 1                             | 0                        | 0                            | 0    | Hypothetical protein (1)                                     | scaffold_4_mRNA_1.1                                                                                                                                                                        | -                                                                                                                                                                                                        | -                           |                                 |
| GF0029034 | 1                             | 0                        | 0                            | 0    | Hypothetical protein (1)                                     | P-loop containing nucleoside triphosphate hydrolase [IPRO27417] (1)                                                                                                                        | scaffold_3_mRNA_991.1                                                                                                                                                                                    | -                           | -                               |
| GF0029033 | 1                             | 0                        | 0                            | 0    | Hypothetical protein (1)                                     | scaffold_3_mRNA_989.1                                                                                                                                                                      | -                                                                                                                                                                                                        | -                           |                                 |
| GF0029032 | 1                             | 0                        | 0                            | 0    | Hypothetical protein (1)                                     | Aspartic peptidase domain [IPRO21109] (1)                                                                                                                                                  | scaffold_3_mRNA_987.1                                                                                                                                                                                    | -                           | -                               |
| GF0029031 | 1                             | 0                        | 0                            | 0    | Hypothetical protein (1)                                     | scaffold_3_mRNA_985.1                                                                                                                                                                      | -                                                                                                                                                                                                        | -                           |                                 |
| GF0029030 | 1                             | 0                        | 0                            | 0    | Pentatricopeptide repeat-containing family protein (1)       | zinc ion binding [GO:0008270 molecular_function] (1); protein binding [GO:0005515 molecular_function] (1)                                                                                  | Tetratricopeptide-like helical domain [IPRO11990] (1); Pentatricopeptide repeat [IPRO2885] (1); DYW domain [IPRO32867] (1)                                                                               | scaffold_3_mRNA_979.1       | -                               |
| GF0029029 | 1                             | 0                        | 0                            | 0    | Hypothetical protein (1)                                     | scaffold_3_mRNA_973.1                                                                                                                                                                      | -                                                                                                                                                                                                        | -                           |                                 |
| GF0029028 | 1                             | 0                        | 0                            | 0    | Hypothetical protein (1)                                     | scaffold_3_mRNA_971.1                                                                                                                                                                      | -                                                                                                                                                                                                        | -                           |                                 |
| GF0029027 | 1                             | 0                        | 0                            | 0    | Hypothetical protein (1)                                     | cysteine-type peptidase activity [GO:0002324 molecular_function] (1); proteolysis [GO:0006508 biological_process] (1)                                                                      | Ulp1 protease family, C-terminal catalytic domain [IPRO03653] (1); Domain of unknown function DUF1985 [IPRO15410] (1)                                                                                    | scaffold_3_mRNA_959.1       | -                               |
| GF0029026 | 1                             | 0                        | 0                            | 0    | Phloem protein 2-A13 (1)                                     | protein binding [GO:0005515 molecular_function] (1)                                                                                                                                        | F-box domain [IPRO01810] (1); Phloem protein 2-like [IPRO25886] (1)                                                                                                                                      | scaffold_3_mRNA_935.1       | -                               |
| GF0029025 | 1                             | 0                        | 0                            | 0    | Hypothetical protein (1)                                     | scaffold_3_mRNA_932.1                                                                                                                                                                      | -                                                                                                                                                                                                        | -                           |                                 |
| GF0029024 | 1                             | 0                        | 0                            | 0    | Hypothetical protein (1)                                     | scaffold_3_mRNA_929.1                                                                                                                                                                      | -                                                                                                                                                                                                        | -                           |                                 |
| GF0029023 | 1                             | 0                        | 0                            | 0    | Hypothetical protein (1)                                     | RNA-directed DNA polymerase (Reverse transcriptase) (1)                                                                                                                                    | Reverse transcriptase domain [IPRO00477] (1)                                                                                                                                                             | scaffold_3_mRNA_924.1       | -                               |
| GF0029022 | 1                             | 0                        | 0                            | 0    | Hypothetical protein (1)                                     | scaffold_3_mRNA_923.1                                                                                                                                                                      | -                                                                                                                                                                                                        | -                           |                                 |
| GF0029021 | 1                             | 0                        | 0                            | 0    | Hypothetical protein (1)                                     | scaffold_3_mRNA_922.1                                                                                                                                                                      | -                                                                                                                                                                                                        | -                           |                                 |
| GF0029020 | 1                             | 0                        | 0                            | 0    | Hypothetical protein (1)                                     | scaffold_3_mRNA_903.1                                                                                                                                                                      | -                                                                                                                                                                                                        | -                           |                                 |

| ID        | Num. in <i>C. clementinae</i> | Num. in <i>C. uchiha</i> | Num. in <i>P. trifoliata</i> | Note                                                           | GO                                                                                                                                                                                                                                                                                                                                                                                                                                                                                                                                                                                                                   | InterPro                                                                                                                                                                                                                                                               | Members in <i>C. clementinae</i> | Members in <i>C. uchiha</i> | Members in <i>P. trifoliata</i> |
|-----------|-------------------------------|--------------------------|------------------------------|----------------------------------------------------------------|----------------------------------------------------------------------------------------------------------------------------------------------------------------------------------------------------------------------------------------------------------------------------------------------------------------------------------------------------------------------------------------------------------------------------------------------------------------------------------------------------------------------------------------------------------------------------------------------------------------------|------------------------------------------------------------------------------------------------------------------------------------------------------------------------------------------------------------------------------------------------------------------------|----------------------------------|-----------------------------|---------------------------------|
| GF0029019 | 1                             | 0                        | 0                            | 0 Hypothetical protein (1)                                     |                                                                                                                                                                                                                                                                                                                                                                                                                                                                                                                                                                                                                      |                                                                                                                                                                                                                                                                        | scaffold_3_mRNA_899.1            | -                           | -                               |
| GF0029018 | 1                             | 0                        | 0                            | 0 Hypothetical protein (1)                                     |                                                                                                                                                                                                                                                                                                                                                                                                                                                                                                                                                                                                                      |                                                                                                                                                                                                                                                                        | scaffold_3_mRNA_897.1            | -                           | -                               |
| GF0029017 | 1                             | 0                        | 0                            | 0 Hypothetical protein (1)                                     |                                                                                                                                                                                                                                                                                                                                                                                                                                                                                                                                                                                                                      |                                                                                                                                                                                                                                                                        | scaffold_3_mRNA_896.1            | -                           | -                               |
| GF0029016 | 1                             | 0                        | 0                            | 0 Hypothetical protein (1)                                     |                                                                                                                                                                                                                                                                                                                                                                                                                                                                                                                                                                                                                      |                                                                                                                                                                                                                                                                        | scaffold_3_mRNA_895.1            | -                           | -                               |
| GF0029015 | 1                             | 0                        | 0                            | 0 Hypothetical protein (1)                                     |                                                                                                                                                                                                                                                                                                                                                                                                                                                                                                                                                                                                                      | Aspartic peptidase domain [IPR021109] (1)                                                                                                                                                                                                                              | scaffold_3_mRNA_881.1            | -                           | -                               |
| GF0029014 | 1                             | 0                        | 0                            | 0 Geraniol 10-hydroxylase (1)                                  | iron ion binding [GO:0005506 molecular_function] (1); heme binding [GO:0020037 molecular_function] (1); oxidation-reduction process [GO:0055114 biological_process] (1); oxidoreductase activity, acting on paired donors, with incorporation or reduction of molecular oxygen [GO:0016705 molecular_function] (1)                                                                                                                                                                                                                                                                                                   | Cytochrome P450 [IPR001128] (1); Cytochrome P450, conserved site [IPR017972] (1); Cytochrome P450, E-class, group 1 [IPR002401] (1)                                                                                                                                    | scaffold_3_mRNA_877.1            | -                           | -                               |
| GF0029013 | 1                             | 0                        | 0                            | 0 Hypothetical protein (1)                                     | primary amine oxidase activity [GO:0008131 molecular_function] (1); copper ion binding [GO:0005507 molecular_function] (1); oxidation-reduction process [GO:0055114 biological_process] (1); quinone binding [GO:0040838 molecular_function] (1); amine metabolic process [GO:0009308 biological_process] (1)                                                                                                                                                                                                                                                                                                        | Copper amine oxidase, C-terminal [IPR015798] (1); Copper amine oxidase [IPR000269] (1)                                                                                                                                                                                 | scaffold_3_mRNA_838.1            | -                           | -                               |
| GF0029012 | 1                             | 0                        | 0                            | 0 Hypothetical protein (1)                                     |                                                                                                                                                                                                                                                                                                                                                                                                                                                                                                                                                                                                                      | Endonuclease/exonuclease/phosphatase [IPR05135] (1); Reverse transcriptase zinc-binding domain [IPR026960] (1)                                                                                                                                                         | scaffold_3_mRNA_834.1            | -                           | -                               |
| GF0029011 | 1                             | 0                        | 0                            | 0 Protein ODORANT1 (1)                                         | DNA binding [GO:0003677 molecular_function] (1)                                                                                                                                                                                                                                                                                                                                                                                                                                                                                                                                                                      | SANT/Myb domain [IPR01005] (1); Myb domain [IPR017930] (1); Homeobox domain-like [IPR009057] (1)                                                                                                                                                                       | scaffold_3_mRNA_828.1            | -                           | -                               |
| GF0029010 | 1                             | 0                        | 0                            | 0 Cytokinin riboside 5'-monophosphate phosphoribohydrolase (1) | proteolysis [GO:0006508 biological_process] (1); cysteine-type peptidase activity [GO:0008234 molecular_function] (1)                                                                                                                                                                                                                                                                                                                                                                                                                                                                                                | LOG family [IPR031100] (1)                                                                                                                                                                                                                                             | scaffold_3_mRNA_814.1            | -                           | -                               |
| GF0029009 | 1                             | 0                        | 0                            | 0 Hypothetical protein (1)                                     |                                                                                                                                                                                                                                                                                                                                                                                                                                                                                                                                                                                                                      | Ulp1 protease family, C-terminal catalytic domain [IPR00653] (1); Domain of unknown function DUF1985 [IPR015410] (1)                                                                                                                                                   | scaffold_3_mRNA_801.1            | -                           | -                               |
| GF0029008 | 1                             | 0                        | 0                            | 0 Zinc finger matrix-type protein 1, putative isoform 1 (1)    |                                                                                                                                                                                                                                                                                                                                                                                                                                                                                                                                                                                                                      |                                                                                                                                                                                                                                                                        | scaffold_3_mRNA_77.2             | -                           | -                               |
| GF0029007 | 1                             | 0                        | 0                            | 0 Hypothetical protein (1)                                     |                                                                                                                                                                                                                                                                                                                                                                                                                                                                                                                                                                                                                      |                                                                                                                                                                                                                                                                        | scaffold_3_mRNA_766.1            | -                           | -                               |
| GF0029006 | 1                             | 0                        | 0                            | 0 Hypothetical protein (1)                                     |                                                                                                                                                                                                                                                                                                                                                                                                                                                                                                                                                                                                                      |                                                                                                                                                                                                                                                                        | scaffold_3_mRNA_747.3            | -                           | -                               |
| GF0029005 | 1                             | 0                        | 0                            | 0 Ribosomal protein L15 (1)                                    | structural constituent of ribosome [GO:0003735 molecular_function] (1); translation [GO:0006412 biological_process] (1); intracellular ribosome [GO:0005840 cellular_component] (1)                                                                                                                                                                                                                                                                                                                                                                                                                                  | Ribosomal protein L15e core domain [IPR024794] (1); Ribosomal protein L15e, conserved site [IPR02025] (1); Ribosomal protein L23L15e core domain [IPR012678] (1); Ribosomal protein L15e [IPR000439] (1)                                                               | scaffold_3_mRNA_743.1            | -                           | -                               |
| GF0029004 | 1                             | 0                        | 0                            | 0 Hypothetical protein (1)                                     |                                                                                                                                                                                                                                                                                                                                                                                                                                                                                                                                                                                                                      |                                                                                                                                                                                                                                                                        | scaffold_3_mRNA_724.1            | -                           | -                               |
| GF0029003 | 1                             | 0                        | 0                            | 0 Hypothetical protein (1)                                     |                                                                                                                                                                                                                                                                                                                                                                                                                                                                                                                                                                                                                      |                                                                                                                                                                                                                                                                        | scaffold_3_mRNA_711.1            | -                           | -                               |
| GF0029002 | 1                             | 0                        | 0                            | 0 Hypothetical protein (1)                                     |                                                                                                                                                                                                                                                                                                                                                                                                                                                                                                                                                                                                                      |                                                                                                                                                                                                                                                                        | scaffold_3_mRNA_709.1            | -                           | -                               |
| GF0029001 | 1                             | 0                        | 0                            | 0 Hypothetical protein (1)                                     |                                                                                                                                                                                                                                                                                                                                                                                                                                                                                                                                                                                                                      |                                                                                                                                                                                                                                                                        | scaffold_3_mRNA_697.1            | -                           | -                               |
| GF0029000 | 1                             | 0                        | 0                            | 0 Hypothetical protein (1)                                     |                                                                                                                                                                                                                                                                                                                                                                                                                                                                                                                                                                                                                      |                                                                                                                                                                                                                                                                        | scaffold_3_mRNA_694.1            | -                           | -                               |
| GF0028999 | 1                             | 0                        | 0                            | 0 Hypothetical protein (1)                                     |                                                                                                                                                                                                                                                                                                                                                                                                                                                                                                                                                                                                                      |                                                                                                                                                                                                                                                                        | scaffold_3_mRNA_693.1            | -                           | -                               |
| GF0028998 | 1                             | 0                        | 0                            | 0 Hypothetical protein (1)                                     |                                                                                                                                                                                                                                                                                                                                                                                                                                                                                                                                                                                                                      |                                                                                                                                                                                                                                                                        | scaffold_3_mRNA_692.1            | -                           | -                               |
| GF0028997 | 1                             | 0                        | 0                            | 0 Hypothetical protein (1)                                     | nucleic acid binding [GO:0003676 molecular_function] (1)                                                                                                                                                                                                                                                                                                                                                                                                                                                                                                                                                             | Ribonuclease H-like domain [IPR012337] (1)                                                                                                                                                                                                                             | scaffold_3_mRNA_690.1            | -                           | -                               |
| GF0028996 | 1                             | 0                        | 0                            | 0 Hypothetical protein (1)                                     |                                                                                                                                                                                                                                                                                                                                                                                                                                                                                                                                                                                                                      | Domain of unknown function DUF4283 [IPR025558] (1)                                                                                                                                                                                                                     | scaffold_3_mRNA_689.1            | -                           | -                               |
| GF0028995 | 1                             | 0                        | 0                            | 0 Ubiquitinyl hydrolase 1 (1)                                  | intracellular [GO:0005622 cellular_component] (1); thiol-dependent ubiquitin-specific protease activity [GO:0008483 molecular_function] (1); ubiquitin-dependent protein catabolic process [GO:0006511 biological_process] (1)                                                                                                                                                                                                                                                                                                                                                                                       | Peptidase C12, ubiquitin carboxyl-terminal hydrolase [IPR001578] (1)                                                                                                                                                                                                   | scaffold_3_mRNA_686.1            | -                           | -                               |
| GF0028994 | 1                             | 0                        | 0                            | 0 Hypothetical protein (1)                                     |                                                                                                                                                                                                                                                                                                                                                                                                                                                                                                                                                                                                                      |                                                                                                                                                                                                                                                                        | scaffold_3_mRNA_683.1            | -                           | -                               |
| GF0028993 | 1                             | 0                        | 0                            | 0 Hypothetical protein (1)                                     |                                                                                                                                                                                                                                                                                                                                                                                                                                                                                                                                                                                                                      |                                                                                                                                                                                                                                                                        | scaffold_3_mRNA_682.1            | -                           | -                               |
| GF0028992 | 1                             | 0                        | 0                            | 0 Hypothetical protein (1)                                     | GTP binding [GO:0005525 molecular_function] (1); oxidation-reduction process [GO:0055114 biological_process] (1); oxidoreductase activity [GO:0016491 molecular_function] (1); GTPase activity [GO:0003924 molecular_function] (1); FAD binding [GO:0071949 molecular_function] (1)                                                                                                                                                                                                                                                                                                                                  | FAD-binding domain [IPR002938] (1); FAD/NAD(P)+-binding domain [IPR023753] (1); P-loop containing nucleoside triphosphate hydrolase [IPR027417] (1); Small GTPase superfamily [IPR01806] (1); Small GTP-binding protein domain [IPR005225] (1)                         | scaffold_3_mRNA_677.1            | -                           | -                               |
| GF0028991 | 1                             | 0                        | 0                            | 0 FAR1 DNA-binding domain protein (1)                          | regulation of transcription, DNA-templated [GO:0006355 biological_process] (1)                                                                                                                                                                                                                                                                                                                                                                                                                                                                                                                                       | FHY3/FAR1 family [IPR031052] (1); FAR1 DNA binding domain [IPR004030] (1)                                                                                                                                                                                              | scaffold_3_mRNA_644.1            | -                           | -                               |
| GF0028990 | 1                             | 0                        | 0                            | 0 Hypothetical protein (1)                                     |                                                                                                                                                                                                                                                                                                                                                                                                                                                                                                                                                                                                                      |                                                                                                                                                                                                                                                                        | scaffold_3_mRNA_640.1            | -                           | -                               |
| GF0028989 | 1                             | 0                        | 0                            | 0 Hypothetical protein (1)                                     |                                                                                                                                                                                                                                                                                                                                                                                                                                                                                                                                                                                                                      |                                                                                                                                                                                                                                                                        | scaffold_3_mRNA_631.1            | -                           | -                               |
| GF0028988 | 1                             | 0                        | 0                            | 0 Hypothetical protein (1)                                     |                                                                                                                                                                                                                                                                                                                                                                                                                                                                                                                                                                                                                      |                                                                                                                                                                                                                                                                        | scaffold_3_mRNA_629.1            | -                           | -                               |
| GF0028987 | 1                             | 0                        | 0                            | 0 Hypothetical protein (1)                                     |                                                                                                                                                                                                                                                                                                                                                                                                                                                                                                                                                                                                                      |                                                                                                                                                                                                                                                                        | scaffold_3_mRNA_628.1            | -                           | -                               |
| GF0028986 | 1                             | 0                        | 0                            | 0 Hypothetical protein (1)                                     |                                                                                                                                                                                                                                                                                                                                                                                                                                                                                                                                                                                                                      |                                                                                                                                                                                                                                                                        | scaffold_3_mRNA_6279.1           | -                           | -                               |
| GF0028985 | 1                             | 0                        | 0                            | 0 Protein transport protein SEC23 (1)                          | zinc ion binding [GO:0008270 molecular_function] (1); intracellular protein transport [GO:0006886 biological_process] (1); ER to Golgi vesicle-mediated transport [GO:0006888 biological_process] (1); COPII vesicle coat [GO:0030127 cellular_component] (1)                                                                                                                                                                                                                                                                                                                                                        | ADF-H/Gelsolin-like domain [IPR029006] (1); Gelsolin-like domain [IPR007123] (1); Zinc finger, Sec23/Sec24-type [IPR006093] (1); von Willebrand factor, type A [IPR002035] (1); Sec23/Sec24, helical domain [IPR006900] (1); Sec23/Sec24, trunk domain [IPR006896] (1) | scaffold_3_mRNA_6276.2           | -                           | -                               |
| GF0028984 | 1                             | 0                        | 0                            | 0 Hypothetical protein (1)                                     | cysteine-type peptidase activity [GO:0008234 molecular_function] (1); proteolysis [GO:0006508 biological_process] (1)                                                                                                                                                                                                                                                                                                                                                                                                                                                                                                | Domain of unknown function DUF1985 [IPR015410] (1); Ulp1 protease family, C-terminal catalytic domain [IPR00653] (1)                                                                                                                                                   | scaffold_3_mRNA_625.1            | -                           | -                               |
| GF0028983 | 1                             | 0                        | 0                            | 0 Hypothetical protein (1)                                     | GTPase activity [GO:0003924 molecular_function] (1); GTP binding [GO:0005525 molecular_function] (1)                                                                                                                                                                                                                                                                                                                                                                                                                                                                                                                 | Small GTPase superfamily [IPR01806] (1); P-loop containing nucleoside triphosphate hydrolase [IPR027417] (1); Small GTP-binding protein domain [IPR005225] (1)                                                                                                         | scaffold_3_mRNA_6248.1           | -                           | -                               |
| GF0028982 | 1                             | 0                        | 0                            | 0 DNA repair recO (1)                                          |                                                                                                                                                                                                                                                                                                                                                                                                                                                                                                                                                                                                                      | ZEFLZ domain [IPR007650] (1)                                                                                                                                                                                                                                           | scaffold_3_mRNA_6241.1           | -                           | -                               |
| GF0028981 | 1                             | 0                        | 0                            | 0 Cytokinin riboside 5'-monophosphate phosphoribohydrolase (1) |                                                                                                                                                                                                                                                                                                                                                                                                                                                                                                                                                                                                                      | LOG family [IPR031100] (1)                                                                                                                                                                                                                                             | scaffold_3_mRNA_6169.1           | -                           | -                               |
| GF0028980 | 1                             | 0                        | 0                            | 0 Hypothetical protein (1)                                     |                                                                                                                                                                                                                                                                                                                                                                                                                                                                                                                                                                                                                      |                                                                                                                                                                                                                                                                        | scaffold_3_mRNA_6168.1           | -                           | -                               |
| GF0028979 | 1                             | 0                        | 0                            | 0 Hypothetical protein (1)                                     |                                                                                                                                                                                                                                                                                                                                                                                                                                                                                                                                                                                                                      |                                                                                                                                                                                                                                                                        | scaffold_3_mRNA_6110.1           | -                           | -                               |
| GF0028978 | 1                             | 0                        | 0                            | 0 Hypothetical protein (1)                                     |                                                                                                                                                                                                                                                                                                                                                                                                                                                                                                                                                                                                                      |                                                                                                                                                                                                                                                                        | scaffold_3_mRNA_6102.1           | -                           | -                               |
| GF0028977 | 1                             | 0                        | 0                            | 0 Hypothetical protein (1)                                     |                                                                                                                                                                                                                                                                                                                                                                                                                                                                                                                                                                                                                      |                                                                                                                                                                                                                                                                        | scaffold_3_mRNA_6096.1           | -                           | -                               |
| GF0028976 | 1                             | 0                        | 0                            | 0 MADS-box protein SOC1 (1)                                    | positive regulation of transcription from RNA polymerase II promoter [GO:0045944 biological_process] (1); regulation of transcription, DNA-templated [GO:0006355 biological_process] (1); MAPK cascade [GO:0000165 biological_process] (1); transcription factor activity, sequence-specific DNA binding [GO:0003700 molecular_function] (1); protein dimerization activity [GO:0046983 molecular_function] (1); nucleus [GO:0005634 cellular_component] (1); DNA binding [GO:0003677 molecular_function] (1); RNA polymerase II regulatory region sequence-specific DNA binding [GO:0000977 molecular_function] (1) | Transcription factor, MADS-box [IPR002100] (1); Transcription factor, K-box [IPR002487] (1); MADS MEF2-like [IPR033896] (1)                                                                                                                                            | scaffold_3_mRNA_6067.1           | -                           | -                               |
| GF0028975 | 1                             | 0                        | 0                            | 0 Hypothetical protein (1)                                     |                                                                                                                                                                                                                                                                                                                                                                                                                                                                                                                                                                                                                      |                                                                                                                                                                                                                                                                        | scaffold_3_mRNA_6060.1           | -                           | -                               |
| GF0028974 | 1                             | 0                        | 0                            | 0 Hypothetical protein (1)                                     |                                                                                                                                                                                                                                                                                                                                                                                                                                                                                                                                                                                                                      |                                                                                                                                                                                                                                                                        | scaffold_3_mRNA_6026.1           | -                           | -                               |
| GF0028973 | 1                             | 0                        | 0                            | 0 Hypothetical protein (1)                                     |                                                                                                                                                                                                                                                                                                                                                                                                                                                                                                                                                                                                                      |                                                                                                                                                                                                                                                                        | scaffold_3_mRNA_6025.1           | -                           | -                               |
| GF0028972 | 1                             | 0                        | 0                            | 0 Carbonyl reductase 3 (1)                                     |                                                                                                                                                                                                                                                                                                                                                                                                                                                                                                                                                                                                                      | Short-chain dehydrogenase/reductase SDR [IPR002347] (1); NAD(P)+-binding domain [IPR016040] (1)                                                                                                                                                                        | scaffold_3_mRNA_6024.1           | -                           | -                               |
| GF0028971 | 1                             | 0                        | 0                            | 0 Adenylate kinase (1)                                         | ATP binding [GO:0005524 molecular_function] (1); nucleoside-containing compound kinase activity [GO:0019205 molecular_function] (1); nucleoside-containing compound metabolic process [GO:0006139 biological_process] (1)                                                                                                                                                                                                                                                                                                                                                                                            | P-loop containing nucleoside triphosphate hydrolase [IPR027417] (1); Adenylate kinase/UMP-CMP kinase [IPR000850] (1)                                                                                                                                                   | scaffold_3_mRNA_602.1            | -                           | -                               |
| GF0028970 | 1                             | 0                        | 0                            | 0 Myb transcription factor MIXTA-like protein (1)              | DNA binding [GO:0003677 molecular_function] (1)                                                                                                                                                                                                                                                                                                                                                                                                                                                                                                                                                                      | SANT/Myb domain [IPR01005] (1); Myb domain [IPR017930] (1); Homeobox domain-like [IPR009057] (1)                                                                                                                                                                       | scaffold_3_mRNA_6012.1           | -                           | -                               |

| ID        | Num. in <i>C. clementinae</i> | Num. in <i>C. uchiha</i> | Num. in <i>P. trifoliata</i> | Note                                                                       | GO                                                                                                                                                                                                                                                                                                                                                                                     | InterPro                                                                                                                                                                                                                                                                                                                                                                                                                                             | Members in <i>C. clementinae</i> | Members in <i>C. uchiha</i> | Members in <i>P. trifoliata</i> |
|-----------|-------------------------------|--------------------------|------------------------------|----------------------------------------------------------------------------|----------------------------------------------------------------------------------------------------------------------------------------------------------------------------------------------------------------------------------------------------------------------------------------------------------------------------------------------------------------------------------------|------------------------------------------------------------------------------------------------------------------------------------------------------------------------------------------------------------------------------------------------------------------------------------------------------------------------------------------------------------------------------------------------------------------------------------------------------|----------------------------------|-----------------------------|---------------------------------|
| GF0028969 | 1                             | 0                        | 0                            | Integrin-linked protein kinase family isoform 4 (1)                        | ATP binding [GO:000524 molecular_function] (1); protein kinase activity [GO:000472 molecular_function] (1); protein phosphorylation [GO:0006468 biological_process] (1); protein binding [GO:000515 molecular_function] (1)                                                                                                                                                            | Ankyrin repeats-containing domain [IPRO20683] (1); Protein kinase, ATP binding site [IPRO17441] (1); Ankyrin repeat [IPRO2110] (1); Protein kinase-like domain [IPRO11009] (1); Protein kinase domain [IPRO00719] (1)                                                                                                                                                                                                                                | scaffold_3_mRNA_5995.1           | -                           | -                               |
| GF0028968 | 1                             | 0                        | 0                            | Calcium-dependent lipid-binding (CaLB domain) family protein, putative (1) | protein binding [GO:0005515 molecular_function] (1)                                                                                                                                                                                                                                                                                                                                    | C2 domain [IPRO00008] (1)                                                                                                                                                                                                                                                                                                                                                                                                                            | scaffold_3_mRNA_5987.1           | -                           | -                               |
| GF0028967 | 1                             | 0                        | 0                            | Unspecific monooxygenase (1)                                               | iron ion binding [GO:0005506 molecular_function] (1); heme binding [GO:0020037 molecular_function] (1); oxidoreductase activity, acting on paired donors, with incorporation or reduction of molecular oxygen [GO:0016705 molecular_function] (1); oxidation-reduction process [GO:005514 biological_process] (1)                                                                      | Cytochrome P450, E-class, group 1 [IPRO02401] (1); Cytochrome P450, conserved site [IPRO17972] (1); Cytochrome P450 [IPRO01128] (1)                                                                                                                                                                                                                                                                                                                  | scaffold_3_mRNA_5976.1           | -                           | -                               |
| GF0028966 | 1                             | 0                        | 0                            | Hypothetical protein (1)                                                   |                                                                                                                                                                                                                                                                                                                                                                                        |                                                                                                                                                                                                                                                                                                                                                                                                                                                      | scaffold_3_mRNA_5974.1           | -                           | -                               |
| GF0028965 | 1                             | 0                        | 0                            | Hypothetical protein (1)                                                   |                                                                                                                                                                                                                                                                                                                                                                                        |                                                                                                                                                                                                                                                                                                                                                                                                                                                      | scaffold_3_mRNA_5935.1           | -                           | -                               |
| GF0028964 | 1                             | 0                        | 0                            | Hypothetical protein (1)                                                   | nucleic acid binding [GO:0003676 molecular_function] (1)                                                                                                                                                                                                                                                                                                                               | Zinc knuckle CX2CX4HX4C [IPRO25836] (1); Endonuclease/exonuclease/phosphatase [IPRO05153] (1); Domain of unknown function DUF4283 [IPRO25558] (1); Ribonuclease H-like domain [IPRO12337] (1); Reverse transcriptase zinc-binding domain [IPRO20960] (1)                                                                                                                                                                                             | scaffold_3_mRNA_5912.1           | -                           | -                               |
| GF0028963 | 1                             | 0                        | 0                            | Hypothetical protein (1)                                                   |                                                                                                                                                                                                                                                                                                                                                                                        |                                                                                                                                                                                                                                                                                                                                                                                                                                                      | scaffold_3_mRNA_5910.1           | -                           | -                               |
| GF0028962 | 1                             | 0                        | 0                            | Hypothetical protein (1)                                                   | metabolic process [GO:0008152 biological_process] (1); transferase activity, transferring hexosyl groups [GO:0016758 molecular_function] (1)                                                                                                                                                                                                                                           | UDP-glucuronosylUDP-glucosyltransferase [IPRO02213] (1)                                                                                                                                                                                                                                                                                                                                                                                              | scaffold_3_mRNA_5893.1           | -                           | -                               |
| GF0028961 | 1                             | 0                        | 0                            | Hypothetical protein (1)                                                   |                                                                                                                                                                                                                                                                                                                                                                                        |                                                                                                                                                                                                                                                                                                                                                                                                                                                      | scaffold_3_mRNA_5891.1           | -                           | -                               |
| GF0028960 | 1                             | 0                        | 0                            | Hypothetical protein (1)                                                   |                                                                                                                                                                                                                                                                                                                                                                                        |                                                                                                                                                                                                                                                                                                                                                                                                                                                      | scaffold_3_mRNA_5890.1           | -                           | -                               |
| GF0028959 | 1                             | 0                        | 0                            | Hypothetical protein (1)                                                   |                                                                                                                                                                                                                                                                                                                                                                                        |                                                                                                                                                                                                                                                                                                                                                                                                                                                      | scaffold_3_mRNA_581.1            | -                           | -                               |
| GF0028958 | 1                             | 0                        | 0                            | Hypothetical protein (1)                                                   |                                                                                                                                                                                                                                                                                                                                                                                        |                                                                                                                                                                                                                                                                                                                                                                                                                                                      | scaffold_3_mRNA_5806.1           | -                           | -                               |
| GF0028957 | 1                             | 0                        | 0                            | Ubiquitin-40S ribosomal protein S27a (1)                                   | translation [GO:0006412 biological_process] (1); structural constituent of ribosome [GO:0003735 molecular_function] (1); protein binding [GO:0005515 molecular_function] (1); ribosome [GO:0005840 cellular_component] (1); proteolysis [GO:0006508 biological_process] (1); cysteine-type peptidase activity [GO:0008234 molecular_function] (1)                                      | Ubiquitin domain [IPRO00626] (1); Ubiquitin conserved site [IPRO19954] (1); Zinc-binding ribosomal protein [IPRO11352] (1); Ribosomal protein S27a [IPRO20906] (1); Ubiquitin [IPRO19956] (1); Ubiquitin-related domain [IPRO29071] (1)                                                                                                                                                                                                              | scaffold_3_mRNA_5709.1           | -                           | -                               |
| GF0028956 | 1                             | 0                        | 0                            | Hypothetical protein (1)                                                   |                                                                                                                                                                                                                                                                                                                                                                                        | Upl1 protease family, C-terminal catalytic domain [IPRO03653] (1)                                                                                                                                                                                                                                                                                                                                                                                    | scaffold_3_mRNA_5701.1           | -                           | -                               |
| GF0028955 | 1                             | 0                        | 0                            | Mutator-like transposase (1)                                               | zinc ion binding [GO:0008270 molecular_function] (1)                                                                                                                                                                                                                                                                                                                                   | MULE transposase domain [IPRO18289] (1); Zinc finger, PMZ-type [IPRO06564] (1); Transposase, MuDR, plant [IPRO04332] (1); Zinc finger, SWIM-type [IPRO07527] (1)                                                                                                                                                                                                                                                                                     | scaffold_3_mRNA_5700.1           | -                           | -                               |
| GF0028954 | 1                             | 0                        | 0                            | Hypothetical protein (1)                                                   |                                                                                                                                                                                                                                                                                                                                                                                        |                                                                                                                                                                                                                                                                                                                                                                                                                                                      | scaffold_3_mRNA_5688.1           | -                           | -                               |
| GF0028953 | 1                             | 0                        | 0                            | Hypothetical protein (1)                                                   |                                                                                                                                                                                                                                                                                                                                                                                        |                                                                                                                                                                                                                                                                                                                                                                                                                                                      | scaffold_3_mRNA_5684.1           | -                           | -                               |
| GF0028952 | 1                             | 0                        | 0                            | Hypothetical protein (1)                                                   |                                                                                                                                                                                                                                                                                                                                                                                        |                                                                                                                                                                                                                                                                                                                                                                                                                                                      | scaffold_3_mRNA_5671.1           | -                           | -                               |
| GF0028951 | 1                             | 0                        | 0                            | Hypothetical protein (1)                                                   | zinc ion binding [GO:0008270 molecular_function] (1); nucleic acid binding [GO:0003676 molecular_function] (1)                                                                                                                                                                                                                                                                         | Zinc finger, CCHC-type [IPRO01878] (1); Domain of unknown function DUF4283 [IPRO25558] (1)                                                                                                                                                                                                                                                                                                                                                           | scaffold_3_mRNA_5668.1           | -                           | -                               |
| GF0028950 | 1                             | 0                        | 0                            | D27 family protein, putative (1)                                           |                                                                                                                                                                                                                                                                                                                                                                                        | Domain of unknown function DUF4033 [IPRO25114] (1)                                                                                                                                                                                                                                                                                                                                                                                                   | scaffold_3_mRNA_5652.1           | -                           | -                               |
| GF0028949 | 1                             | 0                        | 0                            | Multidrug resistance protein ABC transporter family protein (1)            |                                                                                                                                                                                                                                                                                                                                                                                        | Protein of unknown function DUF4228, plant [IPRO25322] (1)                                                                                                                                                                                                                                                                                                                                                                                           | scaffold_3_mRNA_5626.1           | -                           | -                               |
| GF0028948 | 1                             | 0                        | 0                            | Hypothetical protein (1)                                                   |                                                                                                                                                                                                                                                                                                                                                                                        |                                                                                                                                                                                                                                                                                                                                                                                                                                                      | scaffold_3_mRNA_5616.1           | -                           | -                               |
| GF0028947 | 1                             | 0                        | 0                            | Hypothetical protein (1)                                                   |                                                                                                                                                                                                                                                                                                                                                                                        |                                                                                                                                                                                                                                                                                                                                                                                                                                                      | scaffold_3_mRNA_5611.1           | -                           | -                               |
| GF0028946 | 1                             | 0                        | 0                            | Hypothetical protein (1)                                                   |                                                                                                                                                                                                                                                                                                                                                                                        |                                                                                                                                                                                                                                                                                                                                                                                                                                                      | scaffold_3_mRNA_5603.1           | -                           | -                               |
| GF0028945 | 1                             | 0                        | 0                            | Hypothetical protein (1)                                                   | selenium binding [GO:0008430 molecular_function] (1)                                                                                                                                                                                                                                                                                                                                   | Selenium-binding protein [IPRO08826] (1)                                                                                                                                                                                                                                                                                                                                                                                                             | scaffold_3_mRNA_5599.1           | -                           | -                               |
| GF0028944 | 1                             | 0                        | 0                            | GATA transcription factor 15 (1)                                           | regulation of transcription, DNA-templated [GO:0006355 biological_process] (1); sequence-specific DNA binding [GO:0043565 molecular_function] (1); zinc ion binding [GO:0008270 molecular_function] (1); transcription factor activity, sequence-specific DNA binding [GO:0003700 molecular_function] (1)                                                                              | Zinc finger, NHR/GATA-type [IPRO13088] (1); Zinc finger, GATA-type [IPRO00679] (1)                                                                                                                                                                                                                                                                                                                                                                   | scaffold_3_mRNA_5598.1           | -                           | -                               |
| GF0028943 | 1                             | 0                        | 0                            | Fumarate hydratase (1)                                                     | fumarate metabolic process [GO:0006106 biological_process] (1); tricarboxylic acid cycle [GO:0006099 biological_process] (1); tricarboxylic acid cycle enzyme complex [GO:0045239 cellular_component] (1); lyase activity [GO:0016829 molecular_function] (1); catalytic activity [GO:0003824 molecular_function] (1); fumarate hydratase activity [GO:0004333 molecular_function] (1) | Fumarate/histidase, N-terminal [IPRO24083] (1); Fumarate lyase, conserved site [IPRO20557] (1); Fumarate lyase family [IPRO00562] (1); Fumarate lyase, N-terminal [IPRO22761] (1); Fumarase, C, C-terminal [IPRO18951] (1); Fumarate hydratase, class II [IPRO05677] (1); L-Aspartase-like [IPRO08948] (1)                                                                                                                                           | scaffold_3_mRNA_5581.2           | -                           | -                               |
| GF0028942 | 1                             | 0                        | 0                            | Ribosomal protein L19 (1)                                                  | structural constituent of ribosome [GO:0003735 molecular_function] (1); intracellular [GO:0005622 cellular_component] (1); translation [GO:0006412 biological_process] (1); cytosolic large ribosomal subunit [GO:0022625 cellular_component] (1); ribosome [GO:0005840 cellular_component] (1)                                                                                        | Ribosomal protein L19L19e conserved site [IPRO23638] (1); Ribosomal protein L19, eukaryotic [IPRO33935] (1); Ribosomal protein L19L19e, domain 3 [IPRO15971] (1); Ribosomal protein L19L19e, domain 2 [IPRO15973] (1); Ribosomal protein L19L19e [IPRO00196] (1); Ribosomal protein L19L19e, domain 1 [IPRO15972] (1); Epoxide hydrolase-like [IPRO00639] (1); Alpha/Beta hydrolase fold [IPRO29058] (1); Alpha/beta hydrolase fold-1 [IPRO0073] (1) | scaffold_3_mRNA_5578.1           | -                           | -                               |
| GF0028941 | 1                             | 0                        | 0                            | Epoxide hydrolase 2 (1)                                                    | catalytic activity [GO:0003824 molecular_function] (1)                                                                                                                                                                                                                                                                                                                                 |                                                                                                                                                                                                                                                                                                                                                                                                                                                      | scaffold_3_mRNA_5567.1           | -                           | -                               |
| GF0028940 | 1                             | 0                        | 0                            | Hypothetical protein (1)                                                   | regulation of transcription from RNA polymerase II promoter [GO:0006357 biological_process] (1); RNA polymerase II transcription coactivator activity [GO:0001104 molecular_function] (1); mediator complex [GO:0016592 cellular_component] (1)                                                                                                                                        | Mediator complex, subunit Med14 [IPRO13947] (1)                                                                                                                                                                                                                                                                                                                                                                                                      | scaffold_3_mRNA_5566.1           | -                           | -                               |
| GF0028939 | 1                             | 0                        | 0                            | Hypothetical protein (1)                                                   |                                                                                                                                                                                                                                                                                                                                                                                        |                                                                                                                                                                                                                                                                                                                                                                                                                                                      | scaffold_3_mRNA_5552.1           | -                           | -                               |
| GF0028938 | 1                             | 0                        | 0                            | Poly [ADP-ribose] polymerase (1)                                           | NAD+ ADP-ribosyltransferase activity [GO:0003950 molecular_function] (1); protein ADP-ribosylation [GO:0006471 biological_process] (1)                                                                                                                                                                                                                                                 | Poly(ADP-ribose) polymerase, regulatory domain [IPRO04102] (1); Poly(ADP-ribose) polymerase, catalytic domain [IPRO12377] (1); WGR domain [IPRO08893] (1); SAP domain [IPRO03034] (1)                                                                                                                                                                                                                                                                | scaffold_3_mRNA_5551.1           | -                           | -                               |
| GF0028937 | 1                             | 0                        | 0                            | Empfindlicher im dunkelroten Licht 1 family protein (1)                    | protein binding [GO:0005515 molecular_function] (1)                                                                                                                                                                                                                                                                                                                                    | F-box domain [IPRO01810] (1)                                                                                                                                                                                                                                                                                                                                                                                                                         | scaffold_3_mRNA_5535.1           | -                           | -                               |
| GF0028936 | 1                             | 0                        | 0                            | Mutator-like transposase (1)                                               | zinc ion binding [GO:0008270 molecular_function] (1); nucleic acid binding [GO:0003676 molecular_function] (1)                                                                                                                                                                                                                                                                         | Zinc finger, CCHC-type [IPRO01878] (1); MULE transposase domain [IPRO18289] (1); Zinc finger, PMZ-type [IPRO06564] (1); Transposase, MuDR, plant [IPRO04332] (1); Zinc finger, SWIM-type [IPRO07527] (1)                                                                                                                                                                                                                                             | scaffold_3_mRNA_5464.1           | -                           | -                               |
| GF0028935 | 1                             | 0                        | 0                            | Hypothetical protein (1)                                                   |                                                                                                                                                                                                                                                                                                                                                                                        |                                                                                                                                                                                                                                                                                                                                                                                                                                                      | scaffold_3_mRNA_5462.1           | -                           | -                               |
| GF0028934 | 1                             | 0                        | 0                            | Hypothetical protein (1)                                                   |                                                                                                                                                                                                                                                                                                                                                                                        |                                                                                                                                                                                                                                                                                                                                                                                                                                                      | scaffold_3_mRNA_5455.1           | -                           | -                               |
| GF0028933 | 1                             | 0                        | 0                            | Sieve element occlusion protein (1)                                        |                                                                                                                                                                                                                                                                                                                                                                                        | Sieve element occlusion, N-terminal [IPRO27942] (1); Sieve element occlusion, C-terminal [IPRO27944] (1)                                                                                                                                                                                                                                                                                                                                             | scaffold_3_mRNA_545.1            | -                           | -                               |
| GF0028932 | 1                             | 0                        | 0                            | Hypothetical protein (1)                                                   | integral component of membrane [GO:0016021 cellular_component] (1); mechanically-gated ion channel activity [GO:0008381 molecular_function] (1)                                                                                                                                                                                                                                        | Piezo family [IPRO27272] (1)                                                                                                                                                                                                                                                                                                                                                                                                                         | scaffold_3_mRNA_5423.1           | -                           | -                               |
| GF0028931 | 1                             | 0                        | 0                            | Hypothetical protein (1)                                                   | nucleic acid binding [GO:0003676 molecular_function] (1); zinc ion binding [GO:0008270 molecular_function] (1)                                                                                                                                                                                                                                                                         | Domain of unknown function DUF4283 [IPRO25558] (1); Zinc finger, CCHC-type [IPRO1878] (1); Zinc knuckle CX2CX4HX4C [IPRO25836] (1)                                                                                                                                                                                                                                                                                                                   | scaffold_3_mRNA_5413.1           | -                           | -                               |
| GF0028930 | 1                             | 0                        | 0                            | Non-LTR retroelement reverse transcriptase-like (1)                        | nucleic acid binding [GO:0003676 molecular_function] (1); RNA-DNA hybrid ribonuclease activity [GO:0004523 molecular_function] (1)                                                                                                                                                                                                                                                     | Endonuclease/exonuclease/phosphatase [IPRO05153] (1); Reverse transcriptase zinc-binding domain [IPRO20960] (1); Ribonuclease H-like domain [IPRO12337] (1); Ribonuclease H domain [IPRO02156] (1)                                                                                                                                                                                                                                                   | scaffold_3_mRNA_5412.1           | -                           | -                               |

| ID        | Num. in <i>C. clementinae</i> | Num. in <i>C. uchiha</i> | Num. in <i>P. trifoliata</i> | Note                                                                    | GO                                                                                                                                                                                                                                                                                                                      | InterPro                                                                                                                                                                                                                   | Members in <i>C. clementinae</i> | Members in <i>C. uchiha</i> | Members in <i>P. trifoliata</i> |
|-----------|-------------------------------|--------------------------|------------------------------|-------------------------------------------------------------------------|-------------------------------------------------------------------------------------------------------------------------------------------------------------------------------------------------------------------------------------------------------------------------------------------------------------------------|----------------------------------------------------------------------------------------------------------------------------------------------------------------------------------------------------------------------------|----------------------------------|-----------------------------|---------------------------------|
| GF0028929 | 1                             | 0                        | 0                            | 0 RNA exonuclease 4 (1)                                                 | nucleic acid binding [GO:0003676 molecular_function] (1); metal ion transport [GO:0030001 biological_process] (1); metal ion binding [GO:0046872 molecular_function] (1)                                                                                                                                                | Exonuclease, RNase T/DNA polymerase III [IPRO13520] (1); Ribonuclease H-like domain [IPRO12337] (1); Heavy metal-associated domain, HMA [IPRO06121] (1); Zinc finger C2H2-type [IPRO13087] (1)                             | scaffold_3_mRNA_5404.1           | -                           | -                               |
| GF0028928 | 1                             | 0                        | 0                            | 0 Hypothetical protein (1)                                              | cysteine-type peptidase activity [GO:0008234 molecular_function] (1); proteolysis [GO:0006508 biological_process] (1)                                                                                                                                                                                                   | Upl1 protease family, C-terminal catalytic domain [IPRO03653] (1); Domain of unknown function DUF1985 [IPRO15410] (1)                                                                                                      | scaffold_3_mRNA_5402.1           | -                           | -                               |
| GF0028927 | 1                             | 0                        | 0                            | 0 Hypothetical protein (1)                                              |                                                                                                                                                                                                                                                                                                                         | Transposase-associated domain [IPRO29480] (1)                                                                                                                                                                              | scaffold_3_mRNA_5375.1           | -                           | -                               |
| GF0028926 | 1                             | 0                        | 0                            | 0 Hypothetical protein (1)                                              | nucleic acid binding [GO:0003676 molecular_function] (1)                                                                                                                                                                                                                                                                | Ribonuclease H-like domain [IPRO12337] (1)                                                                                                                                                                                 | scaffold_3_mRNA_5358.1           | -                           | -                               |
| GF0028925 | 1                             | 0                        | 0                            | 0 Monosaccharide transport protein (1)                                  |                                                                                                                                                                                                                                                                                                                         |                                                                                                                                                                                                                            | scaffold_3_mRNA_5353.1           | -                           | -                               |
| GF0028924 | 1                             | 0                        | 0                            | 0 Hypothetical protein (1)                                              |                                                                                                                                                                                                                                                                                                                         |                                                                                                                                                                                                                            | scaffold_3_mRNA_5352.1           | -                           | -                               |
| GF0028923 | 1                             | 0                        | 0                            | 0 Hypothetical protein (1)                                              |                                                                                                                                                                                                                                                                                                                         |                                                                                                                                                                                                                            | scaffold_3_mRNA_5351.1           | -                           | -                               |
| GF0028922 | 1                             | 0                        | 0                            | 0 Cytochrome P450 71A2 (1)                                              | heme binding [GO:0020037 molecular_function] (1); iron ion binding [GO:0005506 molecular_function] (1); oxidoreductase activity, acting on paired donors, with incorporation or reduction of molecular oxygen [GO:0016705 molecular_function] (1); oxidation-reduction process [GO:0055114 biological_process] (1)      | Cytochrome P450 [IPRO01128] (1)                                                                                                                                                                                            | scaffold_3_mRNA_534.1            | -                           | -                               |
| GF0028921 | 1                             | 0                        | 0                            | 0 Hypothetical protein (1)                                              |                                                                                                                                                                                                                                                                                                                         |                                                                                                                                                                                                                            | scaffold_3_mRNA_533.1            | -                           | -                               |
| GF0028920 | 1                             | 0                        | 0                            | 0 Hypothetical protein (1)                                              |                                                                                                                                                                                                                                                                                                                         |                                                                                                                                                                                                                            | scaffold_3_mRNA_5309.1           | -                           | -                               |
| GF0028919 | 1                             | 0                        | 0                            | 0 Hypothetical protein (1)                                              | chlorophyll catabolic process [GO:0015996 biological_process] (1); chlorophyllase activity [GO:0047746 molecular_function] (1)                                                                                                                                                                                          | Chlorophyllase [IPRO17395] (1)                                                                                                                                                                                             | scaffold_3_mRNA_5306.1           | -                           | -                               |
| GF0028918 | 1                             | 0                        | 0                            | 0 Hypothetical protein (1)                                              |                                                                                                                                                                                                                                                                                                                         |                                                                                                                                                                                                                            | scaffold_3_mRNA_53.1             | -                           | -                               |
| GF0028917 | 1                             | 0                        | 0                            | 0 Hypothetical protein (1)                                              |                                                                                                                                                                                                                                                                                                                         |                                                                                                                                                                                                                            | scaffold_3_mRNA_5293.1           | -                           | -                               |
| GF0028916 | 1                             | 0                        | 0                            | 0 Retrotransposon protein, putative, Ty3-gypsy subclass (1)             |                                                                                                                                                                                                                                                                                                                         | Aspartic peptidase domain [IPRO21109] (1)                                                                                                                                                                                  | scaffold_3_mRNA_5292.1           | -                           | -                               |
| GF0028915 | 1                             | 0                        | 0                            | 0 Hypothetical protein (1)                                              |                                                                                                                                                                                                                                                                                                                         |                                                                                                                                                                                                                            | scaffold_3_mRNA_5280.1           | -                           | -                               |
| GF0028914 | 1                             | 0                        | 0                            | 0 Hypothetical protein (1)                                              |                                                                                                                                                                                                                                                                                                                         | Domain of unknown function DUF4283 [IPRO25588] (1)                                                                                                                                                                         | scaffold_3_mRNA_5272.1           | -                           | -                               |
| GF0028913 | 1                             | 0                        | 0                            | 0 Hypothetical protein (1)                                              |                                                                                                                                                                                                                                                                                                                         |                                                                                                                                                                                                                            | scaffold_3_mRNA_5271.1           | -                           | -                               |
| GF0028912 | 1                             | 0                        | 0                            | 0 Hypothetical protein (1)                                              | nucleic acid binding [GO:0003676 molecular_function] (1); DNA binding [GO:0003677 molecular_function] (1)                                                                                                                                                                                                               | Zinc finger, BED-type [IPRO03656] (1); Zinc finger C2H2-type [IPRO13087] (1)                                                                                                                                               | scaffold_3_mRNA_5247.1           | -                           | -                               |
| GF0028911 | 1                             | 0                        | 0                            | 0 Hypothetical protein (1)                                              | integral component of membrane [GO:0016021 cellular_component] (1); transmembrane transporter activity [GO:0022857 molecular_function] (1)                                                                                                                                                                              | WAT1-related protein [IPRO30184] (1)                                                                                                                                                                                       | scaffold_3_mRNA_5229.1           | -                           | -                               |
| GF0028910 | 1                             | 0                        | 0                            | 0 Hypothetical protein (1)                                              |                                                                                                                                                                                                                                                                                                                         |                                                                                                                                                                                                                            | scaffold_3_mRNA_5226.1           | -                           | -                               |
| GF0028909 | 1                             | 0                        | 0                            | 0 Hypothetical protein (1)                                              |                                                                                                                                                                                                                                                                                                                         |                                                                                                                                                                                                                            | scaffold_3_mRNA_5224.1           | -                           | -                               |
| GF0028908 | 1                             | 0                        | 0                            | 0 Actin-depolymerizing factor 6 (1)                                     | actin binding [GO:0003779 molecular_function] (1); actin filament depolymerization [GO:0030042 biological_process] (1); intracellular [GO:0005622 cellular_component] (1); actin cytoskeleton [GO:0015629 cellular_component] (1)                                                                                       | ADF-H/Gelsolin-like domain [IPRO29066] (1); Actin-depolymerizing factor homology domain [IPRO02108] (1); ADF/Cofilin [IPRO17904] (1)                                                                                       | scaffold_3_mRNA_5214.1           | -                           | -                               |
| GF0028907 | 1                             | 0                        | 0                            | 0 Pollen Ole e 1 family allergen (1)                                    |                                                                                                                                                                                                                                                                                                                         |                                                                                                                                                                                                                            | scaffold_3_mRNA_5208.1           | -                           | -                               |
| GF0028906 | 1                             | 0                        | 0                            | 0 Peptidase S24S26A/S26B/S26C family protein (1)                        |                                                                                                                                                                                                                                                                                                                         | Peptidase S24S26A/S26B/S26C [IPRO15927] (1)                                                                                                                                                                                | scaffold_3_mRNA_5203.1           | -                           | -                               |
| GF0028905 | 1                             | 0                        | 0                            | 0 Hypothetical protein (1)                                              | nucleobase-containing compound metabolic process [GO:0006139 biological_process] (1); nucleic acid binding [GO:0003676 molecular_function] (1)                                                                                                                                                                          | YagF/RNase H-like domain [IPRO06641] (1); Ribonuclease H-like domain [IPRO12337] (1)                                                                                                                                       | scaffold_3_mRNA_5202.1           | -                           | -                               |
| GF0028904 | 1                             | 0                        | 0                            | 0 Hypothetical protein (1)                                              | cysteine-type peptidase activity [GO:0008234 molecular_function] (1); proteolysis [GO:0006508 biological_process] (1)                                                                                                                                                                                                   | Upl1 protease family, C-terminal catalytic domain [IPRO03653] (1)                                                                                                                                                          | scaffold_3_mRNA_5188.1           | -                           | -                               |
| GF0028903 | 1                             | 0                        | 0                            | 0 Hypothetical protein (1)                                              |                                                                                                                                                                                                                                                                                                                         |                                                                                                                                                                                                                            | scaffold_3_mRNA_5185.1           | -                           | -                               |
| GF0028902 | 1                             | 0                        | 0                            | 0 Glutathione gamma-glutamylcysteinyltransferase (1)                    | response to metal ion [GO:0010038 biological_process] (1); metal ion binding [GO:0046872 molecular_function] (1); glutathione gamma-glutamylcysteinyltransferase activity [GO:0016756 molecular_function] (1); phytochelatin biosynthetic process [GO:0046938 biological_process] (1)                                   | Phytochelatin synthase [IPRO07719] (1); Phytochelatin synthase, C-terminal [IPRO15407] (1)                                                                                                                                 | scaffold_3_mRNA_5175.1           | -                           | -                               |
| GF0028901 | 1                             | 0                        | 0                            | 0 Hypothetical protein (1)                                              |                                                                                                                                                                                                                                                                                                                         |                                                                                                                                                                                                                            | scaffold_3_mRNA_5169.1           | -                           | -                               |
| GF0028900 | 1                             | 0                        | 0                            | 0 Mutator-like transposase (1)                                          | zinc ion binding [GO:0008270 molecular_function] (1)                                                                                                                                                                                                                                                                    | Zinc finger, PMZ-type [IPRO06564] (1); MULE transposase domain [IPRO18289] (1); Zinc finger, SWIM-type [IPRO07527] (1)                                                                                                     | scaffold_3_mRNA_5153.1           | -                           | -                               |
| GF0028899 | 1                             | 0                        | 0                            | 0 Hypothetical protein (1)                                              |                                                                                                                                                                                                                                                                                                                         |                                                                                                                                                                                                                            | scaffold_3_mRNA_5119.1           | -                           | -                               |
| GF0028898 | 1                             | 0                        | 0                            | 0 Hypothetical protein (1)                                              |                                                                                                                                                                                                                                                                                                                         | Retrotransposon gag domain [IPRO05162] (1)                                                                                                                                                                                 | scaffold_3_mRNA_5114.1           | -                           | -                               |
| GF0028897 | 1                             | 0                        | 0                            | 0 Hypothetical protein (1)                                              |                                                                                                                                                                                                                                                                                                                         |                                                                                                                                                                                                                            | scaffold_3_mRNA_510.1            | -                           | -                               |
| GF0028896 | 1                             | 0                        | 0                            | 0 S-protein homologue 1 (1)                                             |                                                                                                                                                                                                                                                                                                                         | Plant self-incompatibility S1 [IPRO10264] (1)                                                                                                                                                                              | scaffold_3_mRNA_5098.1           | -                           | -                               |
| GF0028895 | 1                             | 0                        | 0                            | 0 Hypothetical protein (1)                                              |                                                                                                                                                                                                                                                                                                                         |                                                                                                                                                                                                                            | scaffold_3_mRNA_5081.1           | -                           | -                               |
| GF0028894 | 1                             | 0                        | 0                            | 0 Hypothetical protein (1)                                              |                                                                                                                                                                                                                                                                                                                         | Retrotransposon gag domain [IPRO05162] (1); Aspartic peptidase domain [IPRO21109] (1)                                                                                                                                      | scaffold_3_mRNA_5076.1           | -                           | -                               |
| GF0028893 | 1                             | 0                        | 0                            | 0 Hypothetical protein (1)                                              |                                                                                                                                                                                                                                                                                                                         |                                                                                                                                                                                                                            | scaffold_3_mRNA_5067.1           | -                           | -                               |
| GF0028892 | 1                             | 0                        | 0                            | 0 Hypothetical protein (1)                                              |                                                                                                                                                                                                                                                                                                                         |                                                                                                                                                                                                                            | scaffold_3_mRNA_5061.1           | -                           | -                               |
| GF0028891 | 1                             | 0                        | 0                            | 0 60S ribosomal protein L27a (1)                                        | ribosome [GO:0005840 cellular_component] (1); intracellular [GO:0005622 cellular_component] (1); translation [GO:0006412 biological_process] (1); large ribosomal subunit [GO:0015934 cellular_component] (1); structural constituent of ribosome [GO:0003735 molecular_function] (1)                                   | Ribosomal protein L15 [IPRO30878] (1); Ribosomal protein L15, conserved site [IPRO01196] (1); Ribosomal protein L15e L15P [IPRO21131] (1)                                                                                  | scaffold_3_mRNA_505.1            | -                           | -                               |
| GF0028890 | 1                             | 0                        | 0                            | 0 Cytokinin riboside 5'-monophosphate phosphoribidylase (1)             |                                                                                                                                                                                                                                                                                                                         | LOG family [IPRO31100] (1); Cytokinin riboside 5'-monophosphate phosphoribidylase LOG [IPRO05269] (1)                                                                                                                      | scaffold_3_mRNA_5021.1           | -                           | -                               |
| GF0028889 | 1                             | 0                        | 0                            | 0 Hypothetical protein (1)                                              |                                                                                                                                                                                                                                                                                                                         |                                                                                                                                                                                                                            | scaffold_3_mRNA_5020.1           | -                           | -                               |
| GF0028888 | 1                             | 0                        | 0                            | 0 Hypothetical protein (1)                                              | binding [GO:0005488 molecular_function] (1)                                                                                                                                                                                                                                                                             | Armadio-like helical [IPRO11989] (1); Armadio-type fold [IPRO16024] (1)                                                                                                                                                    | scaffold_3_mRNA_502.1            | -                           | -                               |
| GF0028887 | 1                             | 0                        | 0                            | 0 Cytochrome P450 82A4 (1)                                              | oxidoreductase activity, acting on paired donors, with incorporation or reduction of molecular oxygen [GO:0016705 molecular_function] (1); oxidation-reduction process [GO:0055114 biological_process] (1); heme binding [GO:0020037 molecular_function] (1); iron ion binding [GO:0005506 molecular_function] (1)      | Cytochrome P450, conserved site [IPRO17972] (1); Cytochrome P450, E-class, group 1 [IPRO02401] (1); Cytochrome P450 [IPRO01128] (1)                                                                                        | scaffold_3_mRNA_5018.1           | -                           | -                               |
| GF0028886 | 1                             | 0                        | 0                            | 0 60S ribosomal protein L36 (1)                                         | translation [GO:0006412 biological_process] (1); intracellular [GO:0005622 cellular_component] (1); structural constituent of ribosome [GO:0003735 molecular_function] (1); ribosome [GO:0005840 cellular_component] (1)                                                                                                | Ribosomal protein L36e [IPRO00509] (1)                                                                                                                                                                                     | scaffold_3_mRNA_5002.1           | -                           | -                               |
| GF0028885 | 1                             | 0                        | 0                            | 0 Hypothetical protein (1)                                              |                                                                                                                                                                                                                                                                                                                         |                                                                                                                                                                                                                            | scaffold_3_mRNA_4989.1           | -                           | -                               |
| GF0028884 | 1                             | 0                        | 0                            | 0 BTB/POZ and MATH domain-containing protein 4 (1)                      | protein binding [GO:0005515 molecular_function] (1)                                                                                                                                                                                                                                                                     | BPM, C-terminal [IPRO34090] (1); SKP1/BTB/POZ domain [IPRO11333] (1); TRAF-like [IPRO08974] (1); MATH/TRAF domain [IPRO02083] (1); BTB/POZ domain [IPRO00210] (1)                                                          | scaffold_3_mRNA_4983.1           | -                           | -                               |
| GF0028883 | 1                             | 0                        | 0                            | 0 Ubiquitin-conjugating enzyme E2 z (1)                                 |                                                                                                                                                                                                                                                                                                                         | Ubiquitin-conjugating enzyme, active site [IPRO23313] (1); Ubiquitin-conjugating enzyme RWD-like [IPRO16135] (1); Ubiquitin-conjugating enzyme E2 [IPRO06088] (1)                                                          | scaffold_3_mRNA_4980.1           | -                           | -                               |
| GF0028882 | 1                             | 0                        | 0                            | 0 2-methyltetrahydropteroyl-biotin-homocysteine S-methyltransferase (1) | zinc ion binding [GO:0008270 molecular_function] (1); cellular amino acid biosynthetic process [GO:0008652 biological_process] (1); methionine biosynthetic process [GO:0009086 biological_process] (1); 5-methyltetrahydropteroyl-biotin-homocysteine S-methyltransferase activity [GO:0003871 molecular_function] (1) | Cobalamin-independent methionine synthase [IPRO06276] (1); Cobalamin-independent methionine synthase MetE, N-terminal [IPRO13215] (1); Cobalamin-independent methionine synthase MetE, C-terminal/archaeal [IPRO02629] (1) | scaffold_3_mRNA_4971.1           | -                           | -                               |



| ID       | Num. in <i>C. clementiae</i> | Num in <i>C. uchiha</i> | Num in <i>P. trifoliata</i> | Note                                                             | GO                                                                                                                                                                                                                                                                                                                 | InterPro                                                                                                                                                                                                                                                                                         | Members in <i>C. clementiae</i> | Members in <i>C. uchiha</i> | Members in <i>P. trifoliata</i> |
|----------|------------------------------|-------------------------|-----------------------------|------------------------------------------------------------------|--------------------------------------------------------------------------------------------------------------------------------------------------------------------------------------------------------------------------------------------------------------------------------------------------------------------|--------------------------------------------------------------------------------------------------------------------------------------------------------------------------------------------------------------------------------------------------------------------------------------------------|---------------------------------|-----------------------------|---------------------------------|
| GF002881 | 1                            | 0                       | 0                           | 0 Hypothetical protein (1)                                       |                                                                                                                                                                                                                                                                                                                    |                                                                                                                                                                                                                                                                                                  | scaffold_3_mRNA_497.1           | -                           | -                               |
| GF002880 | 1                            | 0                       | 0                           | 0 Hypothetical protein (1)                                       |                                                                                                                                                                                                                                                                                                                    |                                                                                                                                                                                                                                                                                                  | scaffold_3_mRNA_4948.1          | -                           | -                               |
| GF002879 | 1                            | 0                       | 0                           | 0 Photosynthetic NDH subcomplex B 2 (1)                          | carbohydrate binding [GO:0030246 molecular_function] (1); carbohydrate metabolic process [GO:0005975 biological_process] (1); catalytic activity [GO:0003824 molecular_function] (1)                                                                                                                               | Glycoside hydrolase-type carbohydrate-binding [IPRO14718] (1); Galactose mutarotase-like domain [IPRO11013] (1)                                                                                                                                                                                  | scaffold_3_mRNA_4926.1          | -                           | -                               |
| GF002878 | 1                            | 0                       | 0                           | 0 Hypothetical protein (1)                                       |                                                                                                                                                                                                                                                                                                                    |                                                                                                                                                                                                                                                                                                  | scaffold_3_mRNA_4918.1          | -                           | -                               |
| GF002877 | 1                            | 0                       | 0                           | 0 Hypothetical protein (1)                                       |                                                                                                                                                                                                                                                                                                                    | Transposase, MuDR, plant [IPRO04332] (1)                                                                                                                                                                                                                                                         | scaffold_3_mRNA_4913.1          | -                           | -                               |
| GF002876 | 1                            | 0                       | 0                           | 0 Hypothetical protein (1)                                       |                                                                                                                                                                                                                                                                                                                    |                                                                                                                                                                                                                                                                                                  | scaffold_3_mRNA_4912.1          | -                           | -                               |
| GF002875 | 1                            | 0                       | 0                           | 0 Hypothetical protein (1)                                       |                                                                                                                                                                                                                                                                                                                    |                                                                                                                                                                                                                                                                                                  | scaffold_3_mRNA_4902.1          | -                           | -                               |
| GF002874 | 1                            | 0                       | 0                           | 0 Hypothetical protein (1)                                       |                                                                                                                                                                                                                                                                                                                    |                                                                                                                                                                                                                                                                                                  | scaffold_3_mRNA_4887.1          | -                           | -                               |
| GF002873 | 1                            | 0                       | 0                           | 0 Hypothetical protein (1)                                       |                                                                                                                                                                                                                                                                                                                    | Domain of unknown function DUF4283 [IPRO25558] (1)                                                                                                                                                                                                                                               | scaffold_3_mRNA_4875.1          | -                           | -                               |
| GF002872 | 1                            | 0                       | 0                           | 0 Cytochrome P450 83B1 (1)                                       | oxidoreductase activity, acting on paired donors, with incorporation or reduction of molecular oxygen [GO:0016705 molecular_function] (1); oxidation-reduction process [GO:0055114 biological_process] (1); iron ion binding [GO:0005506 molecular_function] (1); heme binding [GO:0020037 molecular_function] (1) | Cytochrome P450 [IPRO01128] (1); Cytochrome P450, E-class, group 1 [IPRO02401] (1); Cytochrome P450, conserved site [IPRO17972] (1)                                                                                                                                                              | scaffold_3_mRNA_4873.1          | -                           | -                               |
| GF002871 | 1                            | 0                       | 0                           | 0 Hypothetical protein (1)                                       |                                                                                                                                                                                                                                                                                                                    |                                                                                                                                                                                                                                                                                                  | scaffold_3_mRNA_4871.1          | -                           | -                               |
| GF002870 | 1                            | 0                       | 0                           | 0 Hypothetical protein (1)                                       |                                                                                                                                                                                                                                                                                                                    |                                                                                                                                                                                                                                                                                                  | scaffold_3_mRNA_4870.1          | -                           | -                               |
| GF002869 | 1                            | 0                       | 0                           | 0 Hypothetical protein (1)                                       |                                                                                                                                                                                                                                                                                                                    | Retrotransposon gag domain [IPRO05162] (1)                                                                                                                                                                                                                                                       | scaffold_3_mRNA_4868.1          | -                           | -                               |
| GF002868 | 1                            | 0                       | 0                           | 0 Hypothetical protein (1)                                       | oxidoreductase activity, acting on paired donors, with incorporation or reduction of molecular oxygen [GO:0016705 molecular_function] (1); oxidation-reduction process [GO:0055114 biological_process] (1); iron ion binding [GO:0005506 molecular_function] (1); heme binding [GO:0020037 molecular_function] (1) | Cytochrome P450, conserved site [IPRO17972] (1); Cytochrome P450, E-class, group 1 [IPRO02401] (1); Cytochrome P450 [IPRO01128] (1)                                                                                                                                                              | scaffold_3_mRNA_4867.1          | -                           | -                               |
| GF002867 | 1                            | 0                       | 0                           | 0 Hypothetical protein (1)                                       |                                                                                                                                                                                                                                                                                                                    |                                                                                                                                                                                                                                                                                                  | scaffold_3_mRNA_4865.1          | -                           | -                               |
| GF002866 | 1                            | 0                       | 0                           | 0 Cytokinin riboside 5'-monophosphate phosphoribidohydrolase (1) |                                                                                                                                                                                                                                                                                                                    | LOG family [IPRO03100] (1)                                                                                                                                                                                                                                                                       | scaffold_3_mRNA_4864.1          | -                           | -                               |
| GF002865 | 1                            | 0                       | 0                           | 0 Germin-like protein subfamily 1 member 7 (1)                   | nutrient reservoir activity [GO:0045735 molecular_function] (1); manganese ion binding [GO:0030145 molecular_function] (1)                                                                                                                                                                                         | Cupin 1 [IPRO06045] (1); Germin, manganese binding site [IPRO19780] (1); Germin [IPRO01929] (1); RmlC-like jelly roll fold [IPRO14710] (1); RmlC-like cupin domain [IPRO11051] (1)                                                                                                               | scaffold_3_mRNA_4853.1          | -                           | -                               |
| GF002864 | 1                            | 0                       | 0                           | 0 Hypothetical protein (1)                                       |                                                                                                                                                                                                                                                                                                                    |                                                                                                                                                                                                                                                                                                  | scaffold_3_mRNA_4849.1          | -                           | -                               |
| GF002863 | 1                            | 0                       | 0                           | 0 Germin-like protein subfamily 1 member 7 (1)                   | nutrient reservoir activity [GO:0045735 molecular_function] (1); manganese ion binding [GO:0030145 molecular_function] (1)                                                                                                                                                                                         | RmlC-like jelly roll fold [IPRO14710] (1); RmlC-like cupin domain [IPRO11051] (1); Cupin 1 [IPRO06045] (1); Germin, manganese binding site [IPRO19780] (1); RmlC-like jelly roll fold [IPRO14710] (1)                                                                                            | scaffold_3_mRNA_4846.1          | -                           | -                               |
| GF002862 | 1                            | 0                       | 0                           | 0 Hypothetical protein (1)                                       |                                                                                                                                                                                                                                                                                                                    | Pentatricopeptide repeat [IPRO02885] (1)                                                                                                                                                                                                                                                         | scaffold_3_mRNA_4844.1          | -                           | -                               |
| GF002861 | 1                            | 0                       | 0                           | 0 Germin-like protein subfamily 1 member 7 (1)                   | nutrient reservoir activity [GO:0045735 molecular_function] (1); manganese ion binding [GO:0030145 molecular_function] (1)                                                                                                                                                                                         | RmlC-like jelly roll fold [IPRO14710] (1); Germin, manganese binding site [IPRO19780] (1); Cupin 1 [IPRO06045] (1); RmlC-like cupin domain [IPRO11051] (1)                                                                                                                                       | scaffold_3_mRNA_4842.1          | -                           | -                               |
| GF002860 | 1                            | 0                       | 0                           | 0 LRR receptor-like serine/threonine-protein kinase RCH1 (1)     | ATP binding [GO:0005524 molecular_function] (1); protein phosphorylation [GO:0006468 biological_process] (1); protein kinase activity [GO:0004672 molecular_function] (1)                                                                                                                                          | Leucine-rich repeat domain, L domain-like [IPRO12675] (1); Protein kinase-like domain [IPRO11009] (1); Leucine-rich repeat, typical subtype [IPRO03591] (1); Serine/threonine-protein kinase, active site [IPRO08271] (1); Leucine-rich repeat-containing N-terminal, plant-type [IPRO13210] (1) | scaffold_3_mRNA_4837.1          | -                           | -                               |
| GF002859 | 1                            | 0                       | 0                           | 0 Plastid transcriptionally active 3 isoform 1 (1)               | protein binding [GO:0005515 molecular_function] (1)                                                                                                                                                                                                                                                                | Tetratricopeptide-like helical domain [IPRO11980] (1); SAP domain [IPRO03034] (1)                                                                                                                                                                                                                | scaffold_3_mRNA_4835.1          | -                           | -                               |
| GF002858 | 1                            | 0                       | 0                           | 0 Cytokinin riboside 5'-monophosphate phosphoribidohydrolase (1) |                                                                                                                                                                                                                                                                                                                    | Cytokinin riboside 5'-monophosphate phosphoribidohydrolase LOG [IPRO05269] (1); LOG family [IPRO03100] (1)                                                                                                                                                                                       | scaffold_3_mRNA_4829.1          | -                           | -                               |
| GF002857 | 1                            | 0                       | 0                           | 0 Hypothetical protein (1)                                       |                                                                                                                                                                                                                                                                                                                    |                                                                                                                                                                                                                                                                                                  | scaffold_3_mRNA_4828.1          | -                           | -                               |
| GF002856 | 1                            | 0                       | 0                           | 0 GDSL esterase/lipase LTL1 (1)                                  | hydrolase activity, acting on ester bonds [GO:0016788 molecular_function] (1)                                                                                                                                                                                                                                      | SGNH hydrolase-type esterase domain [IPRO13830] (1); GDSL lipase/esterase [IPRO01087] (1)                                                                                                                                                                                                        | scaffold_3_mRNA_4826.1          | -                           | -                               |
| GF002855 | 1                            | 0                       | 0                           | 0 Hypothetical protein (1)                                       | catalytic activity [GO:0003824 molecular_function] (1); regulation of transcription, DNA-templated [GO:0006355 biological_process] (1)                                                                                                                                                                             | PPM-type phosphatase domain [IPRO19152] (1); HIV-3/FAR1 family [IPRO31052] (1)                                                                                                                                                                                                                   | scaffold_3_mRNA_4819.1          | -                           | -                               |
| GF002854 | 1                            | 0                       | 0                           | 0 Hypothetical protein (1)                                       |                                                                                                                                                                                                                                                                                                                    |                                                                                                                                                                                                                                                                                                  | scaffold_3_mRNA_4805.1          | -                           | -                               |
| GF002853 | 1                            | 0                       | 0                           | 0 Hypothetical protein (1)                                       | nucleic acid binding [GO:0003676 molecular_function] (1)                                                                                                                                                                                                                                                           | Ribonuclease H-like domain [IPRO12337] (1); Aspartic peptidase domain [IPRO21109] (1); Retrotransposon gag domain [IPRO05162] (1)                                                                                                                                                                | scaffold_3_mRNA_4802.1          | -                           | -                               |
| GF002852 | 1                            | 0                       | 0                           | 0 Hypothetical protein (1)                                       |                                                                                                                                                                                                                                                                                                                    |                                                                                                                                                                                                                                                                                                  | scaffold_3_mRNA_4781.1          | -                           | -                               |
| GF002851 | 1                            | 0                       | 0                           | 0 Cytochrome P450 83B1 (1)                                       | iron ion binding [GO:0005506 molecular_function] (1); heme binding [GO:0020037 molecular_function] (1); oxidation-reduction process [GO:0055114 biological_process] (1); oxidoreductase activity, acting on paired donors, with incorporation or reduction of molecular oxygen [GO:0016705 molecular_function] (1) | Cytochrome P450, conserved site [IPRO17972] (1); Cytochrome P450, E-class, group 1 [IPRO02401] (1); Cytochrome P450 [IPRO01128] (1)                                                                                                                                                              | scaffold_3_mRNA_4780.1          | -                           | -                               |
| GF002850 | 1                            | 0                       | 0                           | 0 Caffeic acid 3-O-methyltransferase (1)                         | methyltransferase activity [GO:0008168 molecular_function] (1); protein dimerization activity [GO:0046983 molecular_function] (1); O-methyltransferase activity [GO:0008171 molecular_function] (1)                                                                                                                | Plant methyltransferase dimerisation [IPRO12967] (1); O-methyltransferase COMT-type [IPRO16461] (1); Winged helix-turn-helix DNA-binding domain [IPRO11991] (1); O-methyltransferase, family 2 [IPRO10177] (1); S-adenosyl-L-methionine-dependent methyltransferase [IPRO20063] (1)              | scaffold_3_mRNA_4771.1          | -                           | -                               |
| GF002849 | 1                            | 0                       | 0                           | 0 Hypothetical protein (1)                                       | nucleic acid binding [GO:0003676 molecular_function] (1); zinc ion binding [GO:0008270 molecular_function] (1)                                                                                                                                                                                                     | Zinc finger, CCHC-type [IPRO01878] (1)                                                                                                                                                                                                                                                           | scaffold_3_mRNA_4770.1          | -                           | -                               |
| GF002848 | 1                            | 0                       | 0                           | 0 Zinc knuckle family protein (1)                                |                                                                                                                                                                                                                                                                                                                    |                                                                                                                                                                                                                                                                                                  | scaffold_3_mRNA_4769.1          | -                           | -                               |
| GF002847 | 1                            | 0                       | 0                           | 0 Hypothetical protein (1)                                       | O-methyltransferase activity [GO:0008171 molecular_function] (1); methyltransferase activity [GO:0008168 molecular_function] (1)                                                                                                                                                                                   | S-adenosyl-L-methionine-dependent methyltransferase [IPRO20063] (1); O-methyltransferase COMT-type [IPRO16461] (1); O-methyltransferase, family 2 [IPRO10177] (1)                                                                                                                                | scaffold_3_mRNA_4767.1          | -                           | -                               |
| GF002846 | 1                            | 0                       | 0                           | 0 Hypothetical protein (1)                                       |                                                                                                                                                                                                                                                                                                                    | Domain of unknown function DUF4371 [IPRO25398] (1)                                                                                                                                                                                                                                               | scaffold_3_mRNA_4763.1          | -                           | -                               |
| GF002845 | 1                            | 0                       | 0                           | 0 Pf1d finger protein, putative (1)                              |                                                                                                                                                                                                                                                                                                                    |                                                                                                                                                                                                                                                                                                  | scaffold_3_mRNA_4742.1          | -                           | -                               |
| GF002844 | 1                            | 0                       | 0                           | 0 Hypothetical protein (1)                                       |                                                                                                                                                                                                                                                                                                                    |                                                                                                                                                                                                                                                                                                  | scaffold_3_mRNA_4734.1          | -                           | -                               |
| GF002843 | 1                            | 0                       | 0                           | 0 Hypothetical protein (1)                                       |                                                                                                                                                                                                                                                                                                                    |                                                                                                                                                                                                                                                                                                  | scaffold_3_mRNA_4731.1          | -                           | -                               |
| GF002842 | 1                            | 0                       | 0                           | 0 Cysteine-rich receptor-like protein kinase 42 (1)              | protein phosphorylation [GO:0006468 biological_process] (1); protein kinase activity [GO:0004672 molecular_function] (1); ATP binding [GO:0005524 molecular_function] (1)                                                                                                                                          | Protein kinase domain [IPRO00719] (1); Protein kinase-like domain [IPRO11009] (1); Serine/threonine-protein kinase, active site [IPRO08271] (1); Serine/threonine/tyrosine-protein kinase, catalytic domain [IPRO01245] (1); Gnk2-homologous domain [IPRO02902] (1)                              | scaffold_3_mRNA_473.1           | -                           | -                               |
| GF002841 | 1                            | 0                       | 0                           | 0 Hypothetical protein (1)                                       | nucleic acid binding [GO:0003676 molecular_function] (1)                                                                                                                                                                                                                                                           | Ribonuclease H-like domain [IPRO12337] (1)                                                                                                                                                                                                                                                       | scaffold_3_mRNA_4727.1          | -                           | -                               |
| GF002840 | 1                            | 0                       | 0                           | 0 Hypothetical protein (1)                                       |                                                                                                                                                                                                                                                                                                                    | Transposase, MuDR, plant [IPRO04332] (1)                                                                                                                                                                                                                                                         | scaffold_3_mRNA_4724.1          | -                           | -                               |
| GF002839 | 1                            | 0                       | 0                           | 0 Hypothetical protein (1)                                       |                                                                                                                                                                                                                                                                                                                    |                                                                                                                                                                                                                                                                                                  | scaffold_3_mRNA_4723.1          | -                           | -                               |
| GF002838 | 1                            | 0                       | 0                           | 0 Hypothetical protein (1)                                       |                                                                                                                                                                                                                                                                                                                    |                                                                                                                                                                                                                                                                                                  | scaffold_3_mRNA_4711.1          | -                           | -                               |
| GF002837 | 1                            | 0                       | 0                           | 0 Hypothetical protein (1)                                       | regulation of transcription, DNA-templated [GO:0006355 biological_process] (1); DNA binding [GO:0003677 molecular_function] (1)                                                                                                                                                                                    | NAC domain [IPRO03441] (1)                                                                                                                                                                                                                                                                       | scaffold_3_mRNA_4707.1          | -                           | -                               |
| GF002836 | 1                            | 0                       | 0                           | 0 Hypothetical protein (1)                                       |                                                                                                                                                                                                                                                                                                                    |                                                                                                                                                                                                                                                                                                  | scaffold_3_mRNA_4701.1          | -                           | -                               |
| GF002835 | 1                            | 0                       | 0                           | 0 Hypothetical protein (1)                                       |                                                                                                                                                                                                                                                                                                                    |                                                                                                                                                                                                                                                                                                  | scaffold_3_mRNA_4700.1          | -                           | -                               |
| GF002834 | 1                            | 0                       | 0                           | 0 Hypothetical protein (1)                                       | RNA-DNA hybrid ribonuclease activity [GO:0004523 molecular_function] (1); nucleic acid binding [GO:0003676 molecular_function] (1)                                                                                                                                                                                 | Ribonuclease H-like domain [IPRO12337] (1); Ribonuclease H domain [IPRO02156] (1)                                                                                                                                                                                                                | scaffold_3_mRNA_47.1            | -                           | -                               |
| GF002833 | 1                            | 0                       | 0                           | 0 Polynucleotidyl transferase, Ribonuclease H fold, putative (1) |                                                                                                                                                                                                                                                                                                                    |                                                                                                                                                                                                                                                                                                  | scaffold_3_mRNA_4696.1          | -                           | -                               |

| ID        | Num. in <i>C. clementinae</i> | Num. in <i>C. uchiha</i> | Num. in <i>P. trifoliata</i> | Note                                                         | GO                                                                                                                                                                                                                                                     | InterPro                                                                                                                                                                                                                                                                                              | Members in <i>C. clementinae</i> | Members in <i>C. uchiha</i> | Members in <i>P. trifoliata</i> |
|-----------|-------------------------------|--------------------------|------------------------------|--------------------------------------------------------------|--------------------------------------------------------------------------------------------------------------------------------------------------------------------------------------------------------------------------------------------------------|-------------------------------------------------------------------------------------------------------------------------------------------------------------------------------------------------------------------------------------------------------------------------------------------------------|----------------------------------|-----------------------------|---------------------------------|
| GF0028832 | 1                             | 0                        | 0                            | Hypothetical protein (1)                                     | catalytic activity [GO:0003824 molecular_function] (1); biotin synthase activity [GO:0004076 molecular_function] (1); iron-sulfur cluster binding [GO:0051536 molecular_function] (1); biotin biosynthetic process [GO:0009102 biological_process] (1) | Biotin synthase [IPR024177] (1); Elongator protein 3/MalB/NifB [IPR006688] (1); Biotin synthase/Biotin biosynthesis bifunctional protein BioAB [IPR026884] (1); Biotin and thiamin synthesis-associated domain [IPR010722] (1); Aldolase-type TIM barrel [IPR013785] (1); Radical SAM [IPR007197] (1) | scaffold_3_mRNA_4695.1           | -                           | -                               |
| GF0028831 | 1                             | 0                        | 0                            | Hypothetical protein (1)                                     |                                                                                                                                                                                                                                                        |                                                                                                                                                                                                                                                                                                       | scaffold_3_mRNA_4694.1           | -                           | -                               |
| GF0028830 | 1                             | 0                        | 0                            | Hypothetical protein (1)                                     |                                                                                                                                                                                                                                                        |                                                                                                                                                                                                                                                                                                       | scaffold_3_mRNA_4693.1           | -                           | -                               |
| GF0028829 | 1                             | 0                        | 0                            | Hypothetical protein (1)                                     |                                                                                                                                                                                                                                                        |                                                                                                                                                                                                                                                                                                       | scaffold_3_mRNA_4692.1           | -                           | -                               |
| GF0028828 | 1                             | 0                        | 0                            | Hypothetical protein (1)                                     | nucleic acid binding [GO:0003676 molecular_function] (1)                                                                                                                                                                                               | Ribonuclease H-like domain [IPR012337] (1)                                                                                                                                                                                                                                                            | scaffold_3_mRNA_4691.1           | -                           | -                               |
| GF0028827 | 1                             | 0                        | 0                            | Cytokinin riboside 5'-monophosphate phosphoribohydrolase (1) |                                                                                                                                                                                                                                                        | LOG family [IPR031100] (1)                                                                                                                                                                                                                                                                            | scaffold_3_mRNA_4689.1           | -                           | -                               |
| GF0028826 | 1                             | 0                        | 0                            | Hypothetical protein (1)                                     |                                                                                                                                                                                                                                                        |                                                                                                                                                                                                                                                                                                       | scaffold_3_mRNA_4687.1           | -                           | -                               |
| GF0028825 | 1                             | 0                        | 0                            | Biotin synthase (1)                                          | biotin biosynthetic process [GO:0009102 biological_process] (1); catalytic activity [GO:0003824 molecular_function] (1); biotin synthase activity [GO:0004076 molecular_function] (1); iron-sulfur cluster binding [GO:0051536 molecular_function] (1) | Biotin synthase/Biotin biosynthesis bifunctional protein BioAB [IPR026884] (1); Elongator protein 3/MalB/NifB [IPR006688] (1); Aldolase-type TIM barrel [IPR013785] (1); Biotin and thiamin synthesis-associated domain [IPR010722] (1); Biotin synthase [IPR024177] (1)                              | scaffold_3_mRNA_4684.1           | -                           | -                               |
| GF0028824 | 1                             | 0                        | 0                            | Hypothetical protein (1)                                     |                                                                                                                                                                                                                                                        |                                                                                                                                                                                                                                                                                                       | scaffold_3_mRNA_4683.1           | -                           | -                               |
| GF0028823 | 1                             | 0                        | 0                            | Hypothetical protein (1)                                     |                                                                                                                                                                                                                                                        |                                                                                                                                                                                                                                                                                                       | scaffold_3_mRNA_4682.1           | -                           | -                               |
| GF0028822 | 1                             | 0                        | 0                            | Hypothetical protein (1)                                     |                                                                                                                                                                                                                                                        |                                                                                                                                                                                                                                                                                                       | scaffold_3_mRNA_4681.1           | -                           | -                               |
| GF0028821 | 1                             | 0                        | 0                            | Hypothetical protein (1)                                     |                                                                                                                                                                                                                                                        |                                                                                                                                                                                                                                                                                                       | scaffold_3_mRNA_4679.1           | -                           | -                               |
| GF0028820 | 1                             | 0                        | 0                            | Hypothetical protein (1)                                     |                                                                                                                                                                                                                                                        |                                                                                                                                                                                                                                                                                                       | scaffold_3_mRNA_4669.1           | -                           | -                               |
| GF0028819 | 1                             | 0                        | 0                            | Ribonuclease H-like superfamily protein (1)                  |                                                                                                                                                                                                                                                        | Reverse transcriptase zinc-binding domain [IPR026960] (1)                                                                                                                                                                                                                                             | scaffold_3_mRNA_4663.1           | -                           | -                               |
| GF0028818 | 1                             | 0                        | 0                            | Hypothetical protein (1)                                     |                                                                                                                                                                                                                                                        |                                                                                                                                                                                                                                                                                                       | scaffold_3_mRNA_4655.1           | -                           | -                               |
| GF0028817 | 1                             | 0                        | 0                            | Hypothetical protein (1)                                     |                                                                                                                                                                                                                                                        |                                                                                                                                                                                                                                                                                                       | scaffold_3_mRNA_4650.1           | -                           | -                               |
| GF0028816 | 1                             | 0                        | 0                            | Hypothetical protein (1)                                     | proteolysis [GO:0006508 biological_process] (1); cysteine-type peptidase activity [GO:0008234 molecular_function] (1)                                                                                                                                  | Ulp1 protease family, C-terminal catalytic domain [IPR003653] (1)                                                                                                                                                                                                                                     | scaffold_3_mRNA_4649.1           | -                           | -                               |
| GF0028815 | 1                             | 0                        | 0                            | Hypothetical protein (1)                                     |                                                                                                                                                                                                                                                        |                                                                                                                                                                                                                                                                                                       | scaffold_3_mRNA_4647.1           | -                           | -                               |
| GF0028814 | 1                             | 0                        | 0                            | Hypothetical protein (1)                                     | DNA binding [GO:0003677 molecular_function] (1); regulation of transcription, DNA-templated [GO:0006355 biological_process] (1)                                                                                                                        | NAC domain [IPR003441] (1)                                                                                                                                                                                                                                                                            | scaffold_3_mRNA_4645.1           | -                           | -                               |
| GF0028813 | 1                             | 0                        | 0                            | NAC domain-containing protein 42 (1)                         | regulation of transcription, DNA-templated [GO:0006355 biological_process] (1); DNA binding [GO:0003677 molecular_function] (1)                                                                                                                        | NAC domain [IPR003441] (1)                                                                                                                                                                                                                                                                            | scaffold_3_mRNA_4644.1           | -                           | -                               |
| GF0028812 | 1                             | 0                        | 0                            | Hypothetical protein (1)                                     |                                                                                                                                                                                                                                                        |                                                                                                                                                                                                                                                                                                       | scaffold_3_mRNA_4639.1           | -                           | -                               |
| GF0028811 | 1                             | 0                        | 0                            | Hypothetical protein (1)                                     | regulation of transcription, DNA-templated [GO:0006355 biological_process] (1); DNA binding [GO:0003677 molecular_function] (1)                                                                                                                        | NAC domain [IPR003441] (1)                                                                                                                                                                                                                                                                            | scaffold_3_mRNA_4638.1           | -                           | -                               |
| GF0028810 | 1                             | 0                        | 0                            | Hypothetical protein (1)                                     |                                                                                                                                                                                                                                                        |                                                                                                                                                                                                                                                                                                       | scaffold_3_mRNA_4629.1           | -                           | -                               |
| GF0028809 | 1                             | 0                        | 0                            | Hypothetical protein (1)                                     | DNA binding [GO:0003677 molecular_function] (1)                                                                                                                                                                                                        | Zinc finger, BED-type [IPR003656] (1)                                                                                                                                                                                                                                                                 | scaffold_3_mRNA_4614.1           | -                           | -                               |
| GF0028808 | 1                             | 0                        | 0                            | Hypothetical protein (1)                                     | nucleic acid binding [GO:0003676 molecular_function] (1); protein dimerization activity [GO:0046983 molecular_function] (1); DNA binding [GO:0003677 molecular_function] (1)                                                                           | HAT, C-terminal dimerisation domain [IPR008906] (1); Zinc finger, BED-type [IPR003656] (1); Ribonuclease H-like domain [IPR012337] (1); Viral movement protein [IPR028919] (1); hA1-like transposase, RNase-H fold [IPR025525] (1)                                                                    | scaffold_3_mRNA_4611.1           | -                           | -                               |
| GF0028807 | 1                             | 0                        | 0                            | Hypothetical protein (1)                                     | nucleic acid binding [GO:0003676 molecular_function] (1)                                                                                                                                                                                               | Ribonuclease H-like domain [IPR012337] (1)                                                                                                                                                                                                                                                            | scaffold_3_mRNA_4606.1           | -                           | -                               |
| GF0028806 | 1                             | 0                        | 0                            | Hypothetical protein (1)                                     |                                                                                                                                                                                                                                                        |                                                                                                                                                                                                                                                                                                       | scaffold_3_mRNA_4601.1           | -                           | -                               |
| GF0028805 | 1                             | 0                        | 0                            | BED zinc finger/HAT family dimerization domain (1)           | DNA binding [GO:0003677 molecular_function] (1); protein dimerization activity [GO:0046983 molecular_function] (1); nucleic acid binding [GO:0003676 molecular_function] (1)                                                                           | Zinc finger, BED-type [IPR003656] (1); Ribonuclease H-like domain [IPR012337] (1); HAT-like transposase, RNase-H fold [IPR025525] (1); Zinc finger C2H2-type [IPR013087] (1); HAT, C-terminal dimerisation domain [IPR008906] (1)                                                                     | scaffold_3_mRNA_4599.1           | -                           | -                               |
| GF0028804 | 1                             | 0                        | 0                            | Hypothetical protein (1)                                     |                                                                                                                                                                                                                                                        | P-type ATPase, transmembrane domain [IPR023298] (1)                                                                                                                                                                                                                                                   | scaffold_3_mRNA_4591.1           | -                           | -                               |
| GF0028803 | 1                             | 0                        | 0                            | Hypothetical protein (1)                                     | nucleotide binding [GO:0000166 molecular_function] (1)                                                                                                                                                                                                 | P-type ATPase, cytoplasmic domain N [IPR023299] (1); HAD-like domain [IPR023214] (1)                                                                                                                                                                                                                  | scaffold_3_mRNA_4590.1           | -                           | -                               |
| GF0028802 | 1                             | 0                        | 0                            | Hypothetical protein (1)                                     |                                                                                                                                                                                                                                                        |                                                                                                                                                                                                                                                                                                       | scaffold_3_mRNA_4588.1           | -                           | -                               |
| GF0028801 | 1                             | 0                        | 0                            | Hypothetical protein (1)                                     |                                                                                                                                                                                                                                                        |                                                                                                                                                                                                                                                                                                       | scaffold_3_mRNA_4587.1           | -                           | -                               |
| GF0028800 | 1                             | 0                        | 0                            | RNA-directed DNA polymerase ; Ribonuclease H, putative (1)   |                                                                                                                                                                                                                                                        | Endonuclease/exonuclease/phosphatase [IPR05135] (1)                                                                                                                                                                                                                                                   | scaffold_3_mRNA_4578.1           | -                           | -                               |
| GF0028799 | 1                             | 0                        | 0                            | Putative ribonuclease H protein (1)                          | nucleic acid binding [GO:0003676 molecular_function] (1)                                                                                                                                                                                               | Ribonuclease H-like domain [IPR012337] (1); Reverse transcriptase zinc-binding domain [IPR026960] (1)                                                                                                                                                                                                 | scaffold_3_mRNA_4577.1           | -                           | -                               |
| GF0028798 | 1                             | 0                        | 0                            | Hypothetical protein (1)                                     | zinc ion binding [GO:0008270 molecular_function] (1); nucleic acid binding [GO:0003676 molecular_function] (1)                                                                                                                                         | Zinc finger, CCHC-type [IPR001878] (1)                                                                                                                                                                                                                                                                | scaffold_3_mRNA_4571.1           | -                           | -                               |
| GF0028797 | 1                             | 0                        | 0                            | Hypothetical protein (1)                                     |                                                                                                                                                                                                                                                        |                                                                                                                                                                                                                                                                                                       | scaffold_3_mRNA_4570.1           | -                           | -                               |
| GF0028796 | 1                             | 0                        | 0                            | Monoterpene synthase (1)                                     | metabolic process [GO:0008152 biological_process] (1); lyase activity [GO:0016829 molecular_function] (1); terpene synthase activity [GO:0010333 molecular_function] (1); magnesium ion binding [GO:0000287 molecular_function] (1)                    | Isoprenoid synthase domain [IPR008949] (1); Terpene synthase, N-terminal domain [IPR001906] (1); Terpene synthase, metal-binding domain [IPR005630] (1); Terpenoid cycloase/protein prenyltransferase alpha-alpha toroid [IPR008930] (1)                                                              | scaffold_3_mRNA_4569.1           | -                           | -                               |
| GF0028795 | 1                             | 0                        | 0                            | F-box protein SKIP16 (1)                                     |                                                                                                                                                                                                                                                        | SM11/KNR4-like domain [IPR018958] (1); ArgG domain [IPR007474] (1)                                                                                                                                                                                                                                    | scaffold_3_mRNA_4563.1           | -                           | -                               |
| GF0028794 | 1                             | 0                        | 0                            | Hypothetical protein (1)                                     |                                                                                                                                                                                                                                                        |                                                                                                                                                                                                                                                                                                       | scaffold_3_mRNA_4555.1           | -                           | -                               |
| GF0028793 | 1                             | 0                        | 0                            | Hypothetical protein (1)                                     |                                                                                                                                                                                                                                                        |                                                                                                                                                                                                                                                                                                       | scaffold_3_mRNA_4535.1           | -                           | -                               |
| GF0028792 | 1                             | 0                        | 0                            | Hypothetical protein (1)                                     |                                                                                                                                                                                                                                                        |                                                                                                                                                                                                                                                                                                       | scaffold_3_mRNA_4528.1           | -                           | -                               |
| GF0028791 | 1                             | 0                        | 0                            | Hypothetical protein (1)                                     |                                                                                                                                                                                                                                                        |                                                                                                                                                                                                                                                                                                       | scaffold_3_mRNA_4527.1           | -                           | -                               |
| GF0028790 | 1                             | 0                        | 0                            | Hypothetical protein (1)                                     | nucleic acid binding [GO:0003676 molecular_function] (1); zinc ion binding [GO:0008270 molecular_function] (1)                                                                                                                                         | Reverse transcriptase zinc-binding domain [IPR026960] (1); Domain of unknown function DUF4283 [IPR025558] (1); Ribonuclease H-like domain [IPR012337] (1); Zinc knuckle CXC2X4HX4C [IPR025836] (1); Zinc finger, CCHC-type [IPR001878] (1); Aspartic peptidase domain [IPR021109] (1)                 | scaffold_3_mRNA_4526.1           | -                           | -                               |
| GF0028789 | 1                             | 0                        | 0                            | Hypothetical protein (1)                                     |                                                                                                                                                                                                                                                        |                                                                                                                                                                                                                                                                                                       | scaffold_3_mRNA_4523.1           | -                           | -                               |
| GF0028788 | 1                             | 0                        | 0                            | Hypothetical protein (1)                                     |                                                                                                                                                                                                                                                        |                                                                                                                                                                                                                                                                                                       | scaffold_3_mRNA_4520.1           | -                           | -                               |
| GF0028787 | 1                             | 0                        | 0                            | Hypothetical protein (1)                                     | nucleic acid binding [GO:0003676 molecular_function] (1); protein dimerization activity [GO:0046983 molecular_function] (1)                                                                                                                            | HAT, C-terminal dimerisation domain [IPR008906] (1); Ribonuclease H-like domain [IPR012337] (1)                                                                                                                                                                                                       | scaffold_3_mRNA_4518.1           | -                           | -                               |
| GF0028786 | 1                             | 0                        | 0                            | Hypothetical protein (1)                                     | regulation of transcription, DNA-templated [GO:0006355 biological_process] (1); DNA binding [GO:0003677 molecular_function] (1)                                                                                                                        | NAC domain [IPR003441] (1)                                                                                                                                                                                                                                                                            | scaffold_3_mRNA_4517.1           | -                           | -                               |
| GF0028785 | 1                             | 0                        | 0                            | Hypothetical protein (1)                                     |                                                                                                                                                                                                                                                        |                                                                                                                                                                                                                                                                                                       | scaffold_3_mRNA_4514.1           | -                           | -                               |
| GF0028784 | 1                             | 0                        | 0                            | Hypothetical protein (1)                                     | DNA binding [GO:0003677 molecular_function] (1); nucleic acid binding [GO:0003676 molecular_function] (1); zinc ion binding [GO:0008270 molecular_function] (1); regulation of transcription, DNA-templated [GO:0006355 biological_process] (1)        | Zinc finger, CCHC-type [IPR001878] (1); NAC domain [IPR003441] (1); Zinc finger, BED-type [IPR003656] (1); Zinc finger C2H2-type [IPR013087] (1)                                                                                                                                                      | scaffold_3_mRNA_4512.1           | -                           | -                               |
| GF0028783 | 1                             | 0                        | 0                            | Hypothetical protein (1)                                     | transcription factor activity, sequence-specific DNA binding [GO:0003700 molecular_function] (1); regulation of transcription, DNA-templated [GO:0006355 biological_process] (1); DNA binding [GO:0003677 molecular_function] (1)                      | DNA binding domain [IPR016177] (1); AP2/ERF domain [IPR001471] (1)                                                                                                                                                                                                                                    | scaffold_3_mRNA_4510.1           | -                           | -                               |

| ID        | Num. in <i>C. clementinae</i> | Num. in <i>C. uchiha</i> | Num. in <i>P. trifoliata</i> | Note                                                                     | GO                                                                                                                                                                                                                                                                                                                                                                                                | InterPro                                                                                                                                                                                                                                                                                                                                                                                         | Members in <i>C. clementinae</i> | Members in <i>C. uchiha</i> | Members in <i>P. trifoliata</i> |
|-----------|-------------------------------|--------------------------|------------------------------|--------------------------------------------------------------------------|---------------------------------------------------------------------------------------------------------------------------------------------------------------------------------------------------------------------------------------------------------------------------------------------------------------------------------------------------------------------------------------------------|--------------------------------------------------------------------------------------------------------------------------------------------------------------------------------------------------------------------------------------------------------------------------------------------------------------------------------------------------------------------------------------------------|----------------------------------|-----------------------------|---------------------------------|
| GF0028782 | 1                             | 0                        | 0                            | 0 Hypothetical protein (1)                                               | 1-deoxy-D-xylulose 5-phosphate reductoisomerase activity [GO:0030604 molecular_function] (1); oxidation-reduction process [GO:0055114 biological_process] (1); NADPH binding [GO:0070402 molecular_function] (1); isoprenoid biosynthetic process [GO:0008299 biological_process] (1); metal ion binding [GO:0046872 molecular_function] (1); protein binding [GO:0005515 molecular_function] (1) | 1-deoxy-D-xylulose 5-phosphate reductoisomerase, N-terminal [IPRO13512] (1); Penicillone membrane anchor protein Pex14p, N-terminal [IPRO06785] (1); 1-deoxy-D-xylulose 5-phosphate reductoisomerase, C-terminal [IPRO13644] (1); DXP reductoisomerase C-terminal domain [IPRO26877] (1); NAD(P)-binding domain [IPRO16040] (1); 1-deoxy-D-xylulose 5-phosphate reductoisomerase [IPRO03821] (1) | scaffold_3_mRNA_451.1            | -                           | -                               |
| GF0028781 | 1                             | 0                        | 0                            | 0 Hypothetical protein (1)                                               |                                                                                                                                                                                                                                                                                                                                                                                                   | MULE transposase domain [IPRO18289] (1); Transposase, MuDR, plant [IPRO04332] (1)                                                                                                                                                                                                                                                                                                                | scaffold_3_mRNA_4507.1           | -                           | -                               |
| GF0028780 | 1                             | 0                        | 0                            | 0 Hypothetical protein (1)                                               |                                                                                                                                                                                                                                                                                                                                                                                                   | Powdery mildew resistance protein, RPWS domain [IPRO08808] (1)                                                                                                                                                                                                                                                                                                                                   | scaffold_3_mRNA_4500.1           | -                           | -                               |
| GF0028779 | 1                             | 0                        | 0                            | 0 Hypothetical protein (1)                                               |                                                                                                                                                                                                                                                                                                                                                                                                   |                                                                                                                                                                                                                                                                                                                                                                                                  | scaffold_3_mRNA_4498.1           | -                           | -                               |
| GF0028778 | 1                             | 0                        | 0                            | 0 Hypothetical protein (1)                                               |                                                                                                                                                                                                                                                                                                                                                                                                   |                                                                                                                                                                                                                                                                                                                                                                                                  | scaffold_3_mRNA_4495.1           | -                           | -                               |
| GF0028777 | 1                             | 0                        | 0                            | 0 Hypothetical protein (1)                                               | RNA-DNA hybrid ribonuclease activity [GO:0004523 molecular_function] (1); nucleic acid binding [GO:0003676 molecular_function] (1)                                                                                                                                                                                                                                                                | Ribonuclease H domain [IPRO02156] (1); Ribonuclease H-like domain [IPRO12337] (1)                                                                                                                                                                                                                                                                                                                | scaffold_3_mRNA_4492.1           | -                           | -                               |
| GF0028776 | 1                             | 0                        | 0                            | 0 Hypothetical protein (1)                                               |                                                                                                                                                                                                                                                                                                                                                                                                   |                                                                                                                                                                                                                                                                                                                                                                                                  | scaffold_3_mRNA_4486.1           | -                           | -                               |
| GF0028775 | 1                             | 0                        | 0                            | 0 Hypothetical protein (1)                                               |                                                                                                                                                                                                                                                                                                                                                                                                   |                                                                                                                                                                                                                                                                                                                                                                                                  | scaffold_3_mRNA_4480.1           | -                           | -                               |
| GF0028774 | 1                             | 0                        | 0                            | 0 Hypothetical protein (1)                                               |                                                                                                                                                                                                                                                                                                                                                                                                   | Non-haem dioxygenase N-terminal domain [IPRO35992] (1); isopenicillin N synthase-like [IPRO27443] (1)                                                                                                                                                                                                                                                                                            | scaffold_3_mRNA_4478.1           | -                           | -                               |
| GF0028773 | 1                             | 0                        | 0                            | 0 Hypothetical protein (1)                                               |                                                                                                                                                                                                                                                                                                                                                                                                   | Ribosome biogenesis protein BMS1/TSR1, C-terminal [IPRO07034] (1)                                                                                                                                                                                                                                                                                                                                | scaffold_3_mRNA_4477.1           | -                           | -                               |
| GF0028772 | 1                             | 0                        | 0                            | 0 Hypothetical protein (1)                                               |                                                                                                                                                                                                                                                                                                                                                                                                   |                                                                                                                                                                                                                                                                                                                                                                                                  | scaffold_3_mRNA_4471.1           | -                           | -                               |
| GF0028771 | 1                             | 0                        | 0                            | 0 Hypothetical protein (1)                                               |                                                                                                                                                                                                                                                                                                                                                                                                   |                                                                                                                                                                                                                                                                                                                                                                                                  | scaffold_3_mRNA_4470.1           | -                           | -                               |
| GF0028770 | 1                             | 0                        | 0                            | 0 Hypothetical protein (1)                                               |                                                                                                                                                                                                                                                                                                                                                                                                   |                                                                                                                                                                                                                                                                                                                                                                                                  | scaffold_3_mRNA_4468.1           | -                           | -                               |
| GF0028769 | 1                             | 0                        | 0                            | 0 Hypothetical protein (1)                                               |                                                                                                                                                                                                                                                                                                                                                                                                   | Domain of unknown function DUF4283 [IPRO25558] (1)                                                                                                                                                                                                                                                                                                                                               | scaffold_3_mRNA_4466.1           | -                           | -                               |
| GF0028768 | 1                             | 0                        | 0                            | 0 Polynucleotidyl transferase, Ribonuclease H fold (1)                   | nucleic acid binding [GO:0003676 molecular_function] (1)                                                                                                                                                                                                                                                                                                                                          | Ribonuclease H-like domain [IPRO12337] (1); Reverse transcriptase zinc-binding domain [IPRO26960] (1)                                                                                                                                                                                                                                                                                            | scaffold_3_mRNA_4461.1           | -                           | -                               |
| GF0028767 | 1                             | 0                        | 0                            | 0 Hypothetical protein (1)                                               |                                                                                                                                                                                                                                                                                                                                                                                                   |                                                                                                                                                                                                                                                                                                                                                                                                  | scaffold_3_mRNA_4460.1           | -                           | -                               |
| GF0028766 | 1                             | 0                        | 0                            | 0 Hypothetical protein (1)                                               |                                                                                                                                                                                                                                                                                                                                                                                                   | MULE transposase domain [IPRO18289] (1)                                                                                                                                                                                                                                                                                                                                                          | scaffold_3_mRNA_4458.1           | -                           | -                               |
| GF0028765 | 1                             | 0                        | 0                            | 0 Hypothetical protein (1)                                               |                                                                                                                                                                                                                                                                                                                                                                                                   | Rab-GTPase-TBC domain [IPRO00195] (1)                                                                                                                                                                                                                                                                                                                                                            | scaffold_3_mRNA_4457.1           | -                           | -                               |
| GF0028764 | 1                             | 0                        | 0                            | 0 Hypothetical protein (1)                                               |                                                                                                                                                                                                                                                                                                                                                                                                   |                                                                                                                                                                                                                                                                                                                                                                                                  | scaffold_3_mRNA_4456.1           | -                           | -                               |
| GF0028763 | 1                             | 0                        | 0                            | 0 Hypothetical protein (1)                                               | protein dimerization activity [GO:0046983 molecular_function] (1); nucleic acid binding [GO:0003676 molecular_function] (1)                                                                                                                                                                                                                                                                       | Ribonuclease H-like domain [IPRO12337] (1); HAT, C-terminal dimerisation domain [IPRO08906] (1)                                                                                                                                                                                                                                                                                                  | scaffold_3_mRNA_4455.1           | -                           | -                               |
| GF0028762 | 1                             | 0                        | 0                            | 0 Hypothetical protein (1)                                               |                                                                                                                                                                                                                                                                                                                                                                                                   |                                                                                                                                                                                                                                                                                                                                                                                                  | scaffold_3_mRNA_4453.1           | -                           | -                               |
| GF0028761 | 1                             | 0                        | 0                            | 0 Hypothetical protein (1)                                               |                                                                                                                                                                                                                                                                                                                                                                                                   |                                                                                                                                                                                                                                                                                                                                                                                                  | scaffold_3_mRNA_4448.1           | -                           | -                               |
| GF0028760 | 1                             | 0                        | 0                            | 0 CSHC-type zinc finger RING/U-box protein (1)                           | protein binding [GO:0005515 molecular_function] (1); zinc ion binding [GO:0008270 molecular_function] (1); ubiquitin-protein transferase activity [GO:0004842 molecular_function] (1); protein ubiquitination [GO:0016567 biological_process] (1)                                                                                                                                                 | Zinc finger, RING-type, conserved site [IPRO17907] (1); E3 ubiquitin ligase RBR family [IPRO3127] (1); Zinc finger, RING-type [IPRO1841] (1); IHR domain [IPRO02867] (1); Zinc finger, RINGFYVE/PHD-type [IPRO13083] (1)                                                                                                                                                                         | scaffold_3_mRNA_4437.1           | -                           | -                               |
| GF0028759 | 1                             | 0                        | 0                            | 0 Hypothetical protein (1)                                               |                                                                                                                                                                                                                                                                                                                                                                                                   |                                                                                                                                                                                                                                                                                                                                                                                                  | scaffold_3_mRNA_4433.1           | -                           | -                               |
| GF0028758 | 1                             | 0                        | 0                            | 0 Hypothetical protein (1)                                               |                                                                                                                                                                                                                                                                                                                                                                                                   |                                                                                                                                                                                                                                                                                                                                                                                                  | scaffold_3_mRNA_4430.1           | -                           | -                               |
| GF0028757 | 1                             | 0                        | 0                            | 0 Hypothetical protein (1)                                               |                                                                                                                                                                                                                                                                                                                                                                                                   |                                                                                                                                                                                                                                                                                                                                                                                                  | scaffold_3_mRNA_4420.1           | -                           | -                               |
| GF0028756 | 1                             | 0                        | 0                            | 0 Hypothetical protein (1)                                               |                                                                                                                                                                                                                                                                                                                                                                                                   |                                                                                                                                                                                                                                                                                                                                                                                                  | scaffold_3_mRNA_441.1            | -                           | -                               |
| GF0028755 | 1                             | 0                        | 0                            | 0 Hypothetical protein (1)                                               |                                                                                                                                                                                                                                                                                                                                                                                                   |                                                                                                                                                                                                                                                                                                                                                                                                  | scaffold_3_mRNA_4397.1           | -                           | -                               |
| GF0028754 | 1                             | 0                        | 0                            | 0 Probably inactive leucine-rich repeat receptor-like protein kinase (1) | ATP binding [GO:0005524 molecular_function] (1); protein phosphorylation [GO:0006468 biological_process] (1); protein kinase activity [GO:0004672 molecular_function] (1)                                                                                                                                                                                                                         | Serine/threonine-protein kinase, active site [IPRO08271] (1); Protein kinase-like domain [IPRO11009] (1); Protein kinase domain [IPRO00719] (1)                                                                                                                                                                                                                                                  | scaffold_3_mRNA_4379.1           | -                           | -                               |
| GF0028753 | 1                             | 0                        | 0                            | 0 Hypothetical protein (1)                                               |                                                                                                                                                                                                                                                                                                                                                                                                   |                                                                                                                                                                                                                                                                                                                                                                                                  | scaffold_3_mRNA_4377.1           | -                           | -                               |
| GF0028752 | 1                             | 0                        | 0                            | 0 Retrotransposon protein, putative, Ty3-gypsy subclass, expressed (1)   |                                                                                                                                                                                                                                                                                                                                                                                                   | Aspartic peptidase domain [IPRO21109] (1)                                                                                                                                                                                                                                                                                                                                                        | scaffold_3_mRNA_4375.1           | -                           | -                               |
| GF0028751 | 1                             | 0                        | 0                            | 0 Avy9/CF9 rapidly elicited protein (1)                                  |                                                                                                                                                                                                                                                                                                                                                                                                   | Protein of unknown function DUF668 [IPRO0780] (1); Protein of unknown function DUF3475 [IPRO21864] (1)                                                                                                                                                                                                                                                                                           | scaffold_3_mRNA_4372.1           | -                           | -                               |
| GF0028750 | 1                             | 0                        | 0                            | 0 PK (1)                                                                 | protein kinase activity [GO:0004672 molecular_function] (1); protein phosphorylation [GO:0006468 biological_process] (1); ATP binding [GO:0005524 molecular_function] (1)                                                                                                                                                                                                                         | Protein kinase domain [IPRO00719] (1); Protein kinase-like domain [IPRO11009] (1); Protein kinase, ATP binding site [IPRO17441] (1); Serine/threonine-protein kinase, active site [IPRO08271] (1)                                                                                                                                                                                                | scaffold_3_mRNA_4370.1           | -                           | -                               |
| GF0028749 | 1                             | 0                        | 0                            | 0 Leucine rich repeat receptor-like kinase A11g09970 (1)                 | protein phosphorylation [GO:0006468 biological_process] (1); protein kinase activity [GO:0004672 molecular_function] (1); ATP binding [GO:0005524 molecular_function] (1)                                                                                                                                                                                                                         | Serine/threonine-protein kinase, active site [IPRO08271] (1); Protein kinase domain [IPRO00719] (1); Protein kinase-like domain [IPRO11009] (1)                                                                                                                                                                                                                                                  | scaffold_3_mRNA_4369.1           | -                           | -                               |
| GF0028748 | 1                             | 0                        | 0                            | 0 Hypothetical protein (1)                                               |                                                                                                                                                                                                                                                                                                                                                                                                   |                                                                                                                                                                                                                                                                                                                                                                                                  | scaffold_3_mRNA_4367.1           | -                           | -                               |
| GF0028747 | 1                             | 0                        | 0                            | 0 Hypothetical protein (1)                                               | zinc ion binding [GO:0008270 molecular_function] (1); nucleic acid binding [GO:0003676 molecular_function] (1)                                                                                                                                                                                                                                                                                    | Zinc finger, CCHC-type [IPRO01878] (1); Domain of unknown function DUF4219 [IPRO25314] (1)                                                                                                                                                                                                                                                                                                       | scaffold_3_mRNA_4366.1           | -                           | -                               |
| GF0028746 | 1                             | 0                        | 0                            | 0 Hypothetical protein (1)                                               | nucleic acid binding [GO:0003676 molecular_function] (1); protein dimerization activity [GO:0046983 molecular_function] (1)                                                                                                                                                                                                                                                                       | HAT, C-terminal dimerisation domain [IPRO08906] (1); Ribonuclease H-like domain [IPRO12337] (1)                                                                                                                                                                                                                                                                                                  | scaffold_3_mRNA_4364.1           | -                           | -                               |
| GF0028745 | 1                             | 0                        | 0                            | 0 Hypothetical protein (1)                                               |                                                                                                                                                                                                                                                                                                                                                                                                   |                                                                                                                                                                                                                                                                                                                                                                                                  | scaffold_3_mRNA_4363.1           | -                           | -                               |
| GF0028744 | 1                             | 0                        | 0                            | 0 Hypothetical protein (1)                                               |                                                                                                                                                                                                                                                                                                                                                                                                   |                                                                                                                                                                                                                                                                                                                                                                                                  | scaffold_3_mRNA_4362.1           | -                           | -                               |
| GF0028743 | 1                             | 0                        | 0                            | 0 Hypothetical protein (1)                                               |                                                                                                                                                                                                                                                                                                                                                                                                   |                                                                                                                                                                                                                                                                                                                                                                                                  | scaffold_3_mRNA_4361.1           | -                           | -                               |
| GF0028742 | 1                             | 0                        | 0                            | 0 Hypothetical protein (1)                                               | protein dimerization activity [GO:0046983 molecular_function] (1); nucleic acid binding [GO:0003676 molecular_function] (1)                                                                                                                                                                                                                                                                       | Ribonuclease H-like domain [IPRO12337] (1); HAT, C-terminal dimerisation domain [IPRO08906] (1)                                                                                                                                                                                                                                                                                                  | scaffold_3_mRNA_4359.1           | -                           | -                               |
| GF0028741 | 1                             | 0                        | 0                            | 0 Hypothetical protein (1)                                               | ATP binding [GO:0005524 molecular_function] (1); protein phosphorylation [GO:0006468 biological_process] (1); protein kinase activity [GO:0004672 molecular_function] (1)                                                                                                                                                                                                                         | Protein kinase domain [IPRO00719] (1); Protein kinase-like domain [IPRO11009] (1)                                                                                                                                                                                                                                                                                                                | scaffold_3_mRNA_4358.1           | -                           | -                               |
| GF0028740 | 1                             | 0                        | 0                            | 0 Hypothetical protein (1)                                               |                                                                                                                                                                                                                                                                                                                                                                                                   |                                                                                                                                                                                                                                                                                                                                                                                                  | scaffold_3_mRNA_4357.1           | -                           | -                               |
| GF0028739 | 1                             | 0                        | 0                            | 0 Hypothetical protein (1)                                               | protein phosphorylation [GO:0006468 biological_process] (1); protein kinase activity [GO:0004672 molecular_function] (1); ATP binding [GO:0005524 molecular_function] (1)                                                                                                                                                                                                                         | Protein kinase domain [IPRO00719] (1); Protein kinase-like domain [IPRO11009] (1); Protein kinase, ATP binding site [IPRO17441] (1); Serine/threonine-protein kinase, active site [IPRO08271] (1)                                                                                                                                                                                                | scaffold_3_mRNA_4355.1           | -                           | -                               |
| GF0028738 | 1                             | 0                        | 0                            | 0 Hypothetical protein (1)                                               |                                                                                                                                                                                                                                                                                                                                                                                                   |                                                                                                                                                                                                                                                                                                                                                                                                  | scaffold_3_mRNA_4338.1           | -                           | -                               |
| GF0028737 | 1                             | 0                        | 0                            | 0 Hypothetical protein (1)                                               |                                                                                                                                                                                                                                                                                                                                                                                                   | Transposon, En/Spm-like [IPRO04242] (1); Domain of unknown function DUF4218 [IPRO25452] (1)                                                                                                                                                                                                                                                                                                      | scaffold_3_mRNA_4335.1           | -                           | -                               |
| GF0028736 | 1                             | 0                        | 0                            | 0 Hypothetical protein (1)                                               |                                                                                                                                                                                                                                                                                                                                                                                                   |                                                                                                                                                                                                                                                                                                                                                                                                  | scaffold_3_mRNA_4330.1           | -                           | -                               |
| GF0028735 | 1                             | 0                        | 0                            | 0 Hypothetical protein (1)                                               | protein binding [GO:0005515 molecular_function] (1)                                                                                                                                                                                                                                                                                                                                               | VAS1 domain [IPRO31968] (1); C2 domain [IPRO00008] (1)                                                                                                                                                                                                                                                                                                                                           | scaffold_3_mRNA_4329.1           | -                           | -                               |
| GF0028734 | 1                             | 0                        | 0                            | 0 Hypothetical protein (1)                                               |                                                                                                                                                                                                                                                                                                                                                                                                   |                                                                                                                                                                                                                                                                                                                                                                                                  | scaffold_3_mRNA_4325.1           | -                           | -                               |
| GF0028733 | 1                             | 0                        | 0                            | 0 Hypothetical protein (1)                                               |                                                                                                                                                                                                                                                                                                                                                                                                   |                                                                                                                                                                                                                                                                                                                                                                                                  | scaffold_3_mRNA_4315.1           | -                           | -                               |
| GF0028732 | 1                             | 0                        | 0                            | 0 Hypothetical protein (1)                                               |                                                                                                                                                                                                                                                                                                                                                                                                   | Reverse transcriptase zinc-binding domain [IPRO25960] (1); Endonuclease/exonuclease/phosphatase [IPRO05135] (1)                                                                                                                                                                                                                                                                                  | scaffold_3_mRNA_4301.1           | -                           | -                               |
| GF0028731 | 1                             | 0                        | 0                            | 0 Hypothetical protein (1)                                               |                                                                                                                                                                                                                                                                                                                                                                                                   |                                                                                                                                                                                                                                                                                                                                                                                                  | scaffold_3_mRNA_4295.1           | -                           | -                               |
| GF0028730 | 1                             | 0                        | 0                            | 0 Hypothetical protein (1)                                               |                                                                                                                                                                                                                                                                                                                                                                                                   | LOG family [IPRO31100] (1)                                                                                                                                                                                                                                                                                                                                                                       | scaffold_3_mRNA_4294.1           | -                           | -                               |
| GF0028729 | 1                             | 0                        | 0                            | 0 Hypothetical protein (1)                                               |                                                                                                                                                                                                                                                                                                                                                                                                   |                                                                                                                                                                                                                                                                                                                                                                                                  | scaffold_3_mRNA_4285.1           | -                           | -                               |
| GF0028728 | 1                             | 0                        | 0                            | 0 Hypothetical protein (1)                                               | proteolysis [GO:0006508 biological_process] (1); peptidase activity [GO:0008233 molecular_function] (1); attachment of GPI anchor to protein [GO:0016255 biological_process] (1); GPI-anchor transamidase activity [GO:0003923 molecular_function] (1); ADP binding [GO:0045511 molecular_function] (1); GPI-anchor transamidase complex [GO:0042765 cellular_component] (1)                      | P-loop containing nucleoside triphosphate hydrolase [IPRO27417] (1); NB-ARC [IPRO02182] (1); GPI-anchor transamidase [IPRO28361] (1); Peptidase C13, legumain [IPRO01096] (1)                                                                                                                                                                                                                    | scaffold_3_mRNA_4283.1           | -                           | -                               |
| GF0028727 | 1                             | 0                        | 0                            | 0 Hypothetical protein (1)                                               |                                                                                                                                                                                                                                                                                                                                                                                                   | Arabidopsis retrotransposon Ori1 [IPRO04312] (1)                                                                                                                                                                                                                                                                                                                                                 | scaffold_3_mRNA_4282.1           | -                           | -                               |
| GF0028726 | 1                             | 0                        | 0                            | 0 Hypothetical protein (1)                                               |                                                                                                                                                                                                                                                                                                                                                                                                   |                                                                                                                                                                                                                                                                                                                                                                                                  | scaffold_3_mRNA_4281.1           | -                           | -                               |

| ID        | Num. in <i>C. clementinae</i> | Num. in <i>C. uchiha</i> | Num. in <i>P. trifoliata</i> | Note                                                                | GO                                                                                                                                                                                                                                                                                                                                                                                                                                                                                                                                                                                                                                                                                                                                                                                                                                                                                       | InterPro                                                                                                                                                                                                                                                      | Members in <i>C. clementinae</i> | Members in <i>C. uchiha</i> | Members in <i>P. trifoliata</i> |
|-----------|-------------------------------|--------------------------|------------------------------|---------------------------------------------------------------------|------------------------------------------------------------------------------------------------------------------------------------------------------------------------------------------------------------------------------------------------------------------------------------------------------------------------------------------------------------------------------------------------------------------------------------------------------------------------------------------------------------------------------------------------------------------------------------------------------------------------------------------------------------------------------------------------------------------------------------------------------------------------------------------------------------------------------------------------------------------------------------------|---------------------------------------------------------------------------------------------------------------------------------------------------------------------------------------------------------------------------------------------------------------|----------------------------------|-----------------------------|---------------------------------|
| GF0028725 | 1                             | 0                        | 0                            | 0 Hypothetical protein (1)                                          | protein phosphorylation [GO:0006468 biological_process] (1); protein kinase activity [GO:0004672 molecular_function] (1)                                                                                                                                                                                                                                                                                                                                                                                                                                                                                                                                                                                                                                                                                                                                                                 | Protein kinase-like domain [IPR011009] (1); Serine-threonine/tyrosine-protein kinase, catalytic domain [IPR001245] (1)                                                                                                                                        | scaffold_3_mRNA_4280.1           | -                           | -                               |
| GF0028724 | 1                             | 0                        | 0                            | 0 Hypothetical protein (1)                                          |                                                                                                                                                                                                                                                                                                                                                                                                                                                                                                                                                                                                                                                                                                                                                                                                                                                                                          | Leucine-rich repeat domain, L domain-like [IPR032675] (1)                                                                                                                                                                                                     | scaffold_3_mRNA_4279.1           | -                           | -                               |
| GF0028723 | 1                             | 0                        | 0                            | 0 GPI-anchor transamidase (1)                                       | GPI-anchor transamidase complex [GO:0042765 cellular_component] (1); GPI-anchor transamidase activity [GO:0003923 molecular_function] (1); attachment of GPI anchor to protein [GO:0016255 biological_process] (1); proteolysis [GO:0006508 biological_process] (1); peptidase activity [GO:0008233 molecular_function] (1); protein binding [GO:0005515 molecular_function] (1); protein kinase activity [GO:0004672 molecular_function] (1); protein phosphorylation [GO:0006468 biological_process] (1); ATP binding [GO:0005524 molecular_function] (1); GPI-anchor transamidase activity [GO:0003923 molecular_function] (1); GPI-anchor transamidase complex [GO:0042765 cellular_component] (1); proteolysis [GO:0006508 biological_process] (1); peptidase activity [GO:0008233 molecular_function] (1); attachment of GPI anchor to protein [GO:0016255 biological_process] (1) | GPI-anchor transamidase [IPR028361] (1); Peptidase C13, legumain [IPR001096] (1)                                                                                                                                                                              | scaffold_3_mRNA_4275.1           | -                           | -                               |
| GF0028722 | 1                             | 0                        | 0                            | 0 LRR receptor-like kinase (1)                                      |                                                                                                                                                                                                                                                                                                                                                                                                                                                                                                                                                                                                                                                                                                                                                                                                                                                                                          | Malectin [IPR021720] (1); Protein kinase, ATP binding site [IPR017441] (1); Leucine-rich repeat [IPR001611] (1); Protein kinase domain [IPR000719] (1); Leucine-rich repeat domain, L domain-like [IPR032675] (1); Protein kinase-like domain [IPR011009] (1) | scaffold_3_mRNA_4274.1           | -                           | -                               |
| GF0028721 | 1                             | 0                        | 0                            | 0 Hypothetical protein (1)                                          |                                                                                                                                                                                                                                                                                                                                                                                                                                                                                                                                                                                                                                                                                                                                                                                                                                                                                          | GPI-anchor transamidase [IPR028361] (1); Peptidase C13, legumain [IPR001096] (1)                                                                                                                                                                              | scaffold_3_mRNA_4273.1           | -                           | -                               |
| GF0028720 | 1                             | 0                        | 0                            | 0 Hypothetical protein (1)                                          |                                                                                                                                                                                                                                                                                                                                                                                                                                                                                                                                                                                                                                                                                                                                                                                                                                                                                          |                                                                                                                                                                                                                                                               | scaffold_3_mRNA_4266.1           | -                           | -                               |
| GF0028719 | 1                             | 0                        | 0                            | 0 Hypothetical protein (1)                                          |                                                                                                                                                                                                                                                                                                                                                                                                                                                                                                                                                                                                                                                                                                                                                                                                                                                                                          |                                                                                                                                                                                                                                                               | scaffold_3_mRNA_4265.1           | -                           | -                               |
| GF0028718 | 1                             | 0                        | 0                            | 0 Hypothetical protein (1)                                          |                                                                                                                                                                                                                                                                                                                                                                                                                                                                                                                                                                                                                                                                                                                                                                                                                                                                                          |                                                                                                                                                                                                                                                               | scaffold_3_mRNA_4262.1           | -                           | -                               |
| GF0028717 | 1                             | 0                        | 0                            | 0 Hypothetical protein (1)                                          |                                                                                                                                                                                                                                                                                                                                                                                                                                                                                                                                                                                                                                                                                                                                                                                                                                                                                          |                                                                                                                                                                                                                                                               | scaffold_3_mRNA_4261.1           | -                           | -                               |
| GF0028716 | 1                             | 0                        | 0                            | 0 Hypothetical protein (1)                                          |                                                                                                                                                                                                                                                                                                                                                                                                                                                                                                                                                                                                                                                                                                                                                                                                                                                                                          | Leucine-rich repeat domain, L domain-like [IPR032675] (1)                                                                                                                                                                                                     | scaffold_3_mRNA_4256.1           | -                           | -                               |
| GF0028715 | 1                             | 0                        | 0                            | 0 Hypothetical protein (1)                                          |                                                                                                                                                                                                                                                                                                                                                                                                                                                                                                                                                                                                                                                                                                                                                                                                                                                                                          |                                                                                                                                                                                                                                                               | scaffold_3_mRNA_4253.1           | -                           | -                               |
| GF0028714 | 1                             | 0                        | 0                            | 0 Hypothetical protein (1)                                          | protein kinase activity [GO:0004672 molecular_function] (1); proteolysis [GO:0006508 biological_process] (1); peptidase activity [GO:0008233 molecular_function] (1); protein phosphorylation [GO:0006468 biological_process] (1); attachment of GPI anchor to protein [GO:0016255 biological_process] (1); ATP binding [GO:0005524 molecular_function] (1); GPI-anchor transamidase activity [GO:0003923 molecular_function] (1); GPI-anchor transamidase complex [GO:0042765 cellular_component] (1)                                                                                                                                                                                                                                                                                                                                                                                   | GPI-anchor transamidase [IPR028361] (1); Protein kinase domain [IPR000719] (1); Protein kinase-like domain [IPR011009] (1); Peptidase C13, legumain [IPR001096] (1); Serine-threonine/tyrosine-protein kinase, catalytic domain [IPR001245] (1)               | scaffold_3_mRNA_4252.1           | -                           | -                               |
| GF0028713 | 1                             | 0                        | 0                            | 0 Hypothetical protein (1)                                          |                                                                                                                                                                                                                                                                                                                                                                                                                                                                                                                                                                                                                                                                                                                                                                                                                                                                                          |                                                                                                                                                                                                                                                               | scaffold_3_mRNA_4251.1           | -                           | -                               |
| GF0028712 | 1                             | 0                        | 0                            | 0 Hypothetical protein (1)                                          |                                                                                                                                                                                                                                                                                                                                                                                                                                                                                                                                                                                                                                                                                                                                                                                                                                                                                          |                                                                                                                                                                                                                                                               | scaffold_3_mRNA_4250.1           | -                           | -                               |
| GF0028711 | 1                             | 0                        | 0                            | 0 Hypothetical protein (1)                                          |                                                                                                                                                                                                                                                                                                                                                                                                                                                                                                                                                                                                                                                                                                                                                                                                                                                                                          |                                                                                                                                                                                                                                                               | scaffold_3_mRNA_4249.1           | -                           | -                               |
| GF0028710 | 1                             | 0                        | 0                            | 0 Pentapeptide repeat-containing family protein (1)                 | protein binding [GO:0005515 molecular_function] (1)                                                                                                                                                                                                                                                                                                                                                                                                                                                                                                                                                                                                                                                                                                                                                                                                                                      | Pentapeptide repeat [IPR002885] (1); Tetrapeptide-like helical domain [IPR011990] (1)                                                                                                                                                                         | scaffold_3_mRNA_4239.1           | -                           | -                               |
| GF0028709 | 1                             | 0                        | 0                            | 0 Phospholipase, patatin family (1)                                 | metabolic process [GO:0008152 biological_process] (1)                                                                                                                                                                                                                                                                                                                                                                                                                                                                                                                                                                                                                                                                                                                                                                                                                                    | Acyl transferase/acyl hydrolyase/lysophospholipase [IPR016051] (1)                                                                                                                                                                                            | scaffold_3_mRNA_4237.1           | -                           | -                               |
| GF0028708 | 1                             | 0                        | 0                            | 0 Cysteine-rich RIK (RECEPTOR-like protein kinase) 8 (1)            |                                                                                                                                                                                                                                                                                                                                                                                                                                                                                                                                                                                                                                                                                                                                                                                                                                                                                          | Reverse transcriptase, RNA-dependent DNA polymerase [IPR013103] (1)                                                                                                                                                                                           | scaffold_3_mRNA_4236.1           | -                           | -                               |
| GF0028707 | 1                             | 0                        | 0                            | 0 Hypothetical protein (1)                                          |                                                                                                                                                                                                                                                                                                                                                                                                                                                                                                                                                                                                                                                                                                                                                                                                                                                                                          |                                                                                                                                                                                                                                                               | scaffold_3_mRNA_4233.1           | -                           | -                               |
| GF0028706 | 1                             | 0                        | 0                            | 0 Hypothetical protein (1)                                          |                                                                                                                                                                                                                                                                                                                                                                                                                                                                                                                                                                                                                                                                                                                                                                                                                                                                                          |                                                                                                                                                                                                                                                               | scaffold_3_mRNA_4231.1           | -                           | -                               |
| GF0028705 | 1                             | 0                        | 0                            | 0 Hypothetical protein (1)                                          |                                                                                                                                                                                                                                                                                                                                                                                                                                                                                                                                                                                                                                                                                                                                                                                                                                                                                          |                                                                                                                                                                                                                                                               | scaffold_3_mRNA_4230.1           | -                           | -                               |
| GF0028704 | 1                             | 0                        | 0                            | 0 Hypothetical protein (1)                                          |                                                                                                                                                                                                                                                                                                                                                                                                                                                                                                                                                                                                                                                                                                                                                                                                                                                                                          |                                                                                                                                                                                                                                                               | scaffold_3_mRNA_4228.1           | -                           | -                               |
| GF0028703 | 1                             | 0                        | 0                            | 0 Cytokinin riboside 3'-monophosphate phosphoribosyltransferase (1) |                                                                                                                                                                                                                                                                                                                                                                                                                                                                                                                                                                                                                                                                                                                                                                                                                                                                                          | LOG family [IPR031100] (1)                                                                                                                                                                                                                                    | scaffold_3_mRNA_4227.1           | -                           | -                               |
| GF0028702 | 1                             | 0                        | 0                            | 0 Hypothetical protein (1)                                          |                                                                                                                                                                                                                                                                                                                                                                                                                                                                                                                                                                                                                                                                                                                                                                                                                                                                                          |                                                                                                                                                                                                                                                               | scaffold_3_mRNA_4213.1           | -                           | -                               |
| GF0028701 | 1                             | 0                        | 0                            | 0 Hypothetical protein (1)                                          | nucleic acid binding [GO:0003676 molecular_function] (1); zinc ion binding [GO:0008270 molecular_function] (1)                                                                                                                                                                                                                                                                                                                                                                                                                                                                                                                                                                                                                                                                                                                                                                           | Zinc finger, CCHC-type [IPR001878] (1)                                                                                                                                                                                                                        | scaffold_3_mRNA_4212.1           | -                           | -                               |
| GF0028700 | 1                             | 0                        | 0                            | 0 Hypothetical protein (1)                                          |                                                                                                                                                                                                                                                                                                                                                                                                                                                                                                                                                                                                                                                                                                                                                                                                                                                                                          |                                                                                                                                                                                                                                                               | scaffold_3_mRNA_4210.1           | -                           | -                               |
| GF0028699 | 1                             | 0                        | 0                            | 0 Hypothetical protein (1)                                          |                                                                                                                                                                                                                                                                                                                                                                                                                                                                                                                                                                                                                                                                                                                                                                                                                                                                                          |                                                                                                                                                                                                                                                               | scaffold_3_mRNA_4207.1           | -                           | -                               |
| GF0028698 | 1                             | 0                        | 0                            | 0 Zinc knuckle family protein (1)                                   | nucleic acid binding [GO:0003676 molecular_function] (1); zinc ion binding [GO:0008270 molecular_function] (1)                                                                                                                                                                                                                                                                                                                                                                                                                                                                                                                                                                                                                                                                                                                                                                           | Domain of unknown function DUF4219 [IPR02514] (1); Zinc finger, CCHC-type [IPR001878] (1)                                                                                                                                                                     | scaffold_3_mRNA_4205.1           | -                           | -                               |
| GF0028697 | 1                             | 0                        | 0                            | 0 Hypothetical protein (1)                                          |                                                                                                                                                                                                                                                                                                                                                                                                                                                                                                                                                                                                                                                                                                                                                                                                                                                                                          |                                                                                                                                                                                                                                                               | scaffold_3_mRNA_4204.1           | -                           | -                               |
| GF0028696 | 1                             | 0                        | 0                            | 0 Hypothetical protein (1)                                          |                                                                                                                                                                                                                                                                                                                                                                                                                                                                                                                                                                                                                                                                                                                                                                                                                                                                                          |                                                                                                                                                                                                                                                               | scaffold_3_mRNA_4203.1           | -                           | -                               |
| GF0028695 | 1                             | 0                        | 0                            | 0 Hypothetical protein (1)                                          | nucleic acid binding [GO:0003676 molecular_function] (1)                                                                                                                                                                                                                                                                                                                                                                                                                                                                                                                                                                                                                                                                                                                                                                                                                                 | RNA recognition motif domain [IPR000504] (1)                                                                                                                                                                                                                  | scaffold_3_mRNA_4202.1           | -                           | -                               |
| GF0028694 | 1                             | 0                        | 0                            | 0 Hypothetical protein (1)                                          |                                                                                                                                                                                                                                                                                                                                                                                                                                                                                                                                                                                                                                                                                                                                                                                                                                                                                          | Endonuclease/exonuclease/phosphatase [IPR005135] (1)                                                                                                                                                                                                          | scaffold_3_mRNA_4201.1           | -                           | -                               |
| GF0028693 | 1                             | 0                        | 0                            | 0 Hypothetical protein (1)                                          | methyltransferase activity [GO:0008168 molecular_function] (1)                                                                                                                                                                                                                                                                                                                                                                                                                                                                                                                                                                                                                                                                                                                                                                                                                           | Putative S-adenosyl-L-methionine-dependent methyltransferase [IPR004159] (1)                                                                                                                                                                                  | scaffold_3_mRNA_4199.1           | -                           | -                               |
| GF0028692 | 1                             | 0                        | 0                            | 0 Hypothetical protein (1)                                          | nucleic acid binding [GO:0003676 molecular_function] (1)                                                                                                                                                                                                                                                                                                                                                                                                                                                                                                                                                                                                                                                                                                                                                                                                                                 | LOG family [IPR031100] (1); Ribonuclease H-like domain [IPR012337] (1)                                                                                                                                                                                        | scaffold_3_mRNA_4192.1           | -                           | -                               |
| GF0028691 | 1                             | 0                        | 0                            | 0 Hypothetical protein (1)                                          |                                                                                                                                                                                                                                                                                                                                                                                                                                                                                                                                                                                                                                                                                                                                                                                                                                                                                          |                                                                                                                                                                                                                                                               | scaffold_3_mRNA_4191.1           | -                           | -                               |
| GF0028690 | 1                             | 0                        | 0                            | 0 Hypothetical protein (1)                                          |                                                                                                                                                                                                                                                                                                                                                                                                                                                                                                                                                                                                                                                                                                                                                                                                                                                                                          |                                                                                                                                                                                                                                                               | scaffold_3_mRNA_4190.1           | -                           | -                               |
| GF0028689 | 1                             | 0                        | 0                            | 0 Hypothetical protein (1)                                          |                                                                                                                                                                                                                                                                                                                                                                                                                                                                                                                                                                                                                                                                                                                                                                                                                                                                                          |                                                                                                                                                                                                                                                               | scaffold_3_mRNA_4189.1           | -                           | -                               |
| GF0028688 | 1                             | 0                        | 0                            | 0 Hypothetical protein (1)                                          |                                                                                                                                                                                                                                                                                                                                                                                                                                                                                                                                                                                                                                                                                                                                                                                                                                                                                          |                                                                                                                                                                                                                                                               | scaffold_3_mRNA_4180.1           | -                           | -                               |
| GF0028687 | 1                             | 0                        | 0                            | 0 Hypothetical protein (1)                                          | nucleic acid binding [GO:0003676 molecular_function] (1); zinc ion binding [GO:0008270 molecular_function] (1)                                                                                                                                                                                                                                                                                                                                                                                                                                                                                                                                                                                                                                                                                                                                                                           | Aspartic peptidase domain [IPR021109] (1); Retrotransposon gag domain [IPR005162] (1); Retroviral aspartyl protease [IPR013242] (1); Zinc finger, CCHC-type [IPR001878] (1)                                                                                   | scaffold_3_mRNA_4178.1           | -                           | -                               |
| GF0028686 | 1                             | 0                        | 0                            | 0 Hypothetical protein (1)                                          |                                                                                                                                                                                                                                                                                                                                                                                                                                                                                                                                                                                                                                                                                                                                                                                                                                                                                          |                                                                                                                                                                                                                                                               | scaffold_3_mRNA_4169.1           | -                           | -                               |
| GF0028685 | 1                             | 0                        | 0                            | 0 Hypothetical protein (1)                                          |                                                                                                                                                                                                                                                                                                                                                                                                                                                                                                                                                                                                                                                                                                                                                                                                                                                                                          |                                                                                                                                                                                                                                                               | scaffold_3_mRNA_4161.1           | -                           | -                               |
| GF0028684 | 1                             | 0                        | 0                            | 0 Putative retroelement pol polyprotein (1)                         |                                                                                                                                                                                                                                                                                                                                                                                                                                                                                                                                                                                                                                                                                                                                                                                                                                                                                          |                                                                                                                                                                                                                                                               | scaffold_3_mRNA_4160.1           | -                           | -                               |
| GF0028683 | 1                             | 0                        | 0                            | 0 Hypothetical leucine rich repeat protein (1)                      | protein binding [GO:0005515 molecular_function] (1)                                                                                                                                                                                                                                                                                                                                                                                                                                                                                                                                                                                                                                                                                                                                                                                                                                      | Leucine-rich repeat [IPR001611] (1); Leucine-rich repeat domain, L domain-like [IPR032675] (1); Leucine-rich repeat, typical subtype [IPR003591] (1)                                                                                                          | scaffold_3_mRNA_4159.1           | -                           | -                               |
| GF0028682 | 1                             | 0                        | 0                            | 0 Hypothetical protein (1)                                          |                                                                                                                                                                                                                                                                                                                                                                                                                                                                                                                                                                                                                                                                                                                                                                                                                                                                                          |                                                                                                                                                                                                                                                               | scaffold_3_mRNA_4156.1           | -                           | -                               |
| GF0028681 | 1                             | 0                        | 0                            | 0 Hypothetical protein (1)                                          | nucleic acid binding [GO:0003676 molecular_function] (1); transcription factor activity, sequence-specific DNA binding [GO:0003700 molecular_function] (1); root development [GO:0048364 biological_process] (1); regulation of transcription, DNA-templated [GO:0006355 biological_process] (1)                                                                                                                                                                                                                                                                                                                                                                                                                                                                                                                                                                                         | Transcription factor LHW [IPR033260] (1)                                                                                                                                                                                                                      | scaffold_3_mRNA_4152.1           | -                           | -                               |
| GF0028680 | 1                             | 0                        | 0                            | 0 Hypothetical protein (1)                                          |                                                                                                                                                                                                                                                                                                                                                                                                                                                                                                                                                                                                                                                                                                                                                                                                                                                                                          | Retrotransposon gag domain [IPR005162] (1)                                                                                                                                                                                                                    | scaffold_3_mRNA_4151.1           | -                           | -                               |
| GF0028679 | 1                             | 0                        | 0                            | 0 Hypothetical protein (1)                                          | ATP binding [GO:0005524 molecular_function] (1); regulation of microtubule-based process [GO:0032886 biological_process] (1); microtubule binding [GO:0008017 molecular_function] (1); microtubule-based movement [GO:007018 biological_process] (1); microtubule motor activity [GO:0003777 molecular_function] (1); root development [GO:0048364 biological_process] (1)                                                                                                                                                                                                                                                                                                                                                                                                                                                                                                               | Armadillo repeat-containing kinesin-like protein 1/2 [IPR033291] (1); Kinesin motor domain [IPR001752] (1)                                                                                                                                                    | scaffold_3_mRNA_4147.1           | -                           | -                               |
| GF0028678 | 1                             | 0                        | 0                            | 0 Hypothetical protein (1)                                          |                                                                                                                                                                                                                                                                                                                                                                                                                                                                                                                                                                                                                                                                                                                                                                                                                                                                                          |                                                                                                                                                                                                                                                               | scaffold_3_mRNA_4146.1           | -                           | -                               |
| GF0028677 | 1                             | 0                        | 0                            | 0 Hypothetical protein (1)                                          |                                                                                                                                                                                                                                                                                                                                                                                                                                                                                                                                                                                                                                                                                                                                                                                                                                                                                          |                                                                                                                                                                                                                                                               | scaffold_3_mRNA_4145.1           | -                           | -                               |
| GF0028676 | 1                             | 0                        | 0                            | 0 Hypothetical protein (1)                                          |                                                                                                                                                                                                                                                                                                                                                                                                                                                                                                                                                                                                                                                                                                                                                                                                                                                                                          | Viral movement protein [IPR028919] (1)                                                                                                                                                                                                                        | scaffold_3_mRNA_4144.1           | -                           | -                               |
| GF0028675 | 1                             | 0                        | 0                            | 0 Hypothetical protein (1)                                          |                                                                                                                                                                                                                                                                                                                                                                                                                                                                                                                                                                                                                                                                                                                                                                                                                                                                                          |                                                                                                                                                                                                                                                               | scaffold_3_mRNA_4142.1           | -                           | -                               |
| GF0028674 | 1                             | 0                        | 0                            | 0 ATIG67060 protein (1)                                             |                                                                                                                                                                                                                                                                                                                                                                                                                                                                                                                                                                                                                                                                                                                                                                                                                                                                                          |                                                                                                                                                                                                                                                               | scaffold_3_mRNA_4125.1           | -                           | -                               |
| GF0028673 | 1                             | 0                        | 0                            | 0 Hypothetical protein (1)                                          |                                                                                                                                                                                                                                                                                                                                                                                                                                                                                                                                                                                                                                                                                                                                                                                                                                                                                          |                                                                                                                                                                                                                                                               | scaffold_3_mRNA_4122.1           | -                           | -                               |
| GF0028672 | 1                             | 0                        | 0                            | 0 Hypothetical protein (1)                                          |                                                                                                                                                                                                                                                                                                                                                                                                                                                                                                                                                                                                                                                                                                                                                                                                                                                                                          | MULE transposase domain [IPR018289] (1); Transposase, MuDR, plant [IPR004332] (1)                                                                                                                                                                             | scaffold_3_mRNA_4121.1           | -                           | -                               |
| GF0028671 | 1                             | 0                        | 0                            | 0 Hypothetical protein (1)                                          | nucleic acid binding [GO:0003676 molecular_function] (1); zinc ion binding [GO:0008270 molecular_function] (1)                                                                                                                                                                                                                                                                                                                                                                                                                                                                                                                                                                                                                                                                                                                                                                           | Zinc finger, CCHC-type [IPR001878] (1)                                                                                                                                                                                                                        | scaffold_3_mRNA_4120.1           | -                           | -                               |

| ID        | Num in <i>C. clematitae</i> | Num in <i>C. uchiha</i> | Num in <i>P. trifoliata</i> | Note                                                                        | GO                                                                                                                                                                                                                                                                                                                                                                            | InterPro                                                                                                                                                                                                                                                                                                                                                             | Members in <i>Clematitae</i> | Members in <i>Uchiha</i> | Members in <i>Trifoliata</i> |   |
|-----------|-----------------------------|-------------------------|-----------------------------|-----------------------------------------------------------------------------|-------------------------------------------------------------------------------------------------------------------------------------------------------------------------------------------------------------------------------------------------------------------------------------------------------------------------------------------------------------------------------|----------------------------------------------------------------------------------------------------------------------------------------------------------------------------------------------------------------------------------------------------------------------------------------------------------------------------------------------------------------------|------------------------------|--------------------------|------------------------------|---|
| GF0028670 | 1                           | 0                       | 0                           | 0 Hypothetical protein (1)                                                  | oxidation-reduction process [GO:005114 biological_process] (1); oxidoreductase activity, acting on paired donors, with incorporation or reduction of molecular oxygen [GO:0016705 molecular_function] (1); monooxygenase activity [GO:0040497 molecular_function] (1); heme binding [GO:0020037 molecular_function] (1); iron ion binding [GO:0005506 molecular_function] (1) | Cytochrome P450, E-class, group IV [IPRO02403] (1); Cytochrome P450 [IPRO01128] (1); Cytochrome P450, conserved site [IPRO17972] (1)                                                                                                                                                                                                                                 | scaffold_3_mRNA_4117.1       | -                        | -                            |   |
| GF0028669 | 1                           | 0                       | 0                           | 0 Hypothetical protein (1)                                                  |                                                                                                                                                                                                                                                                                                                                                                               |                                                                                                                                                                                                                                                                                                                                                                      |                              | scaffold_3_mRNA_4116.1   | -                            | - |
| GF0028668 | 1                           | 0                       | 0                           | 0 Hypothetical protein (1)                                                  |                                                                                                                                                                                                                                                                                                                                                                               |                                                                                                                                                                                                                                                                                                                                                                      |                              | scaffold_3_mRNA_4115.1   | -                            | - |
| GF0028667 | 1                           | 0                       | 0                           | 0 Hypothetical protein (1)                                                  |                                                                                                                                                                                                                                                                                                                                                                               |                                                                                                                                                                                                                                                                                                                                                                      |                              | scaffold_3_mRNA_4114.1   | -                            | - |
| GF0028666 | 1                           | 0                       | 0                           | 0 Cytochrome P450 71A1 (1)                                                  | oxidoreductase activity, acting on paired donors, with incorporation or reduction of molecular oxygen [GO:0016705 molecular_function] (1); oxidation-reduction process [GO:005114 biological_process] (1); iron ion binding [GO:0005506 molecular_function] (1); heme binding [GO:0020037 molecular_function] (1)                                                             | Cytochrome P450 [IPRO01128] (1); Cytochrome P450, conserved site [IPRO17972] (1); Cytochrome P450, E-class, group I [IPRO02401] (1)                                                                                                                                                                                                                                  | scaffold_3_mRNA_4112.1       | -                        | -                            |   |
| GF0028665 | 1                           | 0                       | 0                           | 0 Hypothetical protein (1)                                                  |                                                                                                                                                                                                                                                                                                                                                                               |                                                                                                                                                                                                                                                                                                                                                                      |                              | scaffold_3_mRNA_4111.1   | -                            | - |
| GF0028664 | 1                           | 0                       | 0                           | 0 Cytochrome P450 (1)                                                       | oxidoreductase activity, acting on paired donors, with incorporation or reduction of molecular oxygen [GO:0016705 molecular_function] (1); oxidation-reduction process [GO:005114 biological_process] (1); iron ion binding [GO:0005506 molecular_function] (1); heme binding [GO:0020037 molecular_function] (1)                                                             | Cytochrome P450 [IPRO01128] (1); Cytochrome P450, E-class, group I [IPRO02401] (1)                                                                                                                                                                                                                                                                                   | scaffold_3_mRNA_4110.1       | -                        | -                            |   |
| GF0028663 | 1                           | 0                       | 0                           | 0 Hypothetical protein (1)                                                  |                                                                                                                                                                                                                                                                                                                                                                               |                                                                                                                                                                                                                                                                                                                                                                      |                              | scaffold_3_mRNA_4109.1   | -                            | - |
| GF0028662 | 1                           | 0                       | 0                           | 0 Hypothetical protein (1)                                                  |                                                                                                                                                                                                                                                                                                                                                                               |                                                                                                                                                                                                                                                                                                                                                                      |                              | scaffold_3_mRNA_4107.1   | -                            | - |
| GF0028661 | 1                           | 0                       | 0                           | 0 Hypothetical protein (1)                                                  | iron ion binding [GO:0005506 molecular_function] (1); heme binding [GO:0020037 molecular_function] (1); oxidoreductase activity, acting on paired donors, with incorporation or reduction of molecular oxygen [GO:0016705 molecular_function] (1); oxidation-reduction process [GO:005114 biological_process] (1)                                                             | Cytochrome P450 [IPRO01128] (1); Cytochrome P450, E-class, group I [IPRO02401] (1)                                                                                                                                                                                                                                                                                   | scaffold_3_mRNA_4106.1       | -                        | -                            |   |
| GF0028660 | 1                           | 0                       | 0                           | 0 Hypothetical protein (1)                                                  |                                                                                                                                                                                                                                                                                                                                                                               |                                                                                                                                                                                                                                                                                                                                                                      |                              | scaffold_3_mRNA_4105.1   | -                            | - |
| GF0028659 | 1                           | 0                       | 0                           | 0 Hypothetical protein (1)                                                  |                                                                                                                                                                                                                                                                                                                                                                               |                                                                                                                                                                                                                                                                                                                                                                      |                              | scaffold_3_mRNA_4104.1   | -                            | - |
| GF0028658 | 1                           | 0                       | 0                           | 0 Hypothetical protein (1)                                                  |                                                                                                                                                                                                                                                                                                                                                                               |                                                                                                                                                                                                                                                                                                                                                                      |                              | scaffold_3_mRNA_4103.1   | -                            | - |
| GF0028657 | 1                           | 0                       | 0                           | 0 Hypothetical protein (1)                                                  |                                                                                                                                                                                                                                                                                                                                                                               |                                                                                                                                                                                                                                                                                                                                                                      |                              | scaffold_3_mRNA_4094.1   | -                            | - |
| GF0028656 | 1                           | 0                       | 0                           | 0 Hypothetical protein (1)                                                  |                                                                                                                                                                                                                                                                                                                                                                               |                                                                                                                                                                                                                                                                                                                                                                      |                              | scaffold_3_mRNA_4093.1   | -                            | - |
| GF0028655 | 1                           | 0                       | 0                           | 0 Hypothetical protein (1)                                                  |                                                                                                                                                                                                                                                                                                                                                                               |                                                                                                                                                                                                                                                                                                                                                                      |                              | scaffold_3_mRNA_4080.1   | -                            | - |
| GF0028654 | 1                           | 0                       | 0                           | 0 Kinase superfamily protein isoform 2 (1)                                  |                                                                                                                                                                                                                                                                                                                                                                               | Wall-associated receptor kinase, C-terminal [IPRO32872] (1); FYF1/FAR1 family [IPRO31052] (1); FAR1 DNA binding domain [IPRO04330] (1); Isoprenoid synthase domain [IPRO08949] (1); Zinc finger, SWIM-type [IPRO07527] (1); Zinc finger, PMZ-type [IPRO06564] (1); MULE transposase domain [IPRO18289] (1); Terpenase synthase, metal-binding domain [IPRO05630] (1) |                              | scaffold_3_mRNA_4079.1   | -                            | - |
| GF0028653 | 1                           | 0                       | 0                           | 0 Protein FAR1-RELATED SEQUENCE (1)                                         | magnesium ion binding [GO:0000287 molecular_function] (1); lysase activity [GO:0016829 molecular_function] (1); terpenase synthase activity [GO:0010333 molecular_function] (1); zinc ion binding [GO:0008270 molecular_function] (1); regulation of transcription, DNA-templated [GO:0006365 biological_process] (1)                                                         |                                                                                                                                                                                                                                                                                                                                                                      |                              | scaffold_3_mRNA_4077.1   | -                            | - |
| GF0028652 | 1                           | 0                       | 0                           | 0 Hypothetical protein (1)                                                  |                                                                                                                                                                                                                                                                                                                                                                               |                                                                                                                                                                                                                                                                                                                                                                      |                              | scaffold_3_mRNA_4064.1   | -                            | - |
| GF0028651 | 1                           | 0                       | 0                           | 0 Hypothetical protein (1)                                                  |                                                                                                                                                                                                                                                                                                                                                                               |                                                                                                                                                                                                                                                                                                                                                                      |                              | scaffold_3_mRNA_4057.1   | -                            | - |
| GF0028650 | 1                           | 0                       | 0                           | 0 Hypothetical protein (1)                                                  |                                                                                                                                                                                                                                                                                                                                                                               |                                                                                                                                                                                                                                                                                                                                                                      |                              | scaffold_3_mRNA_4056.1   | -                            | - |
| GF0028649 | 1                           | 0                       | 0                           | 0 Class I glutamine amidotransferase-like superfamily protein isoform 2 (1) |                                                                                                                                                                                                                                                                                                                                                                               | Protein DJ-1 [IPRO06287] (1); Class I glutamine amidotransferase-like [IPRO29062] (1); DJ-1/Pip1 [IPRO02818] (1)                                                                                                                                                                                                                                                     |                              | scaffold_3_mRNA_4052.1   | -                            | - |
| GF0028648 | 1                           | 0                       | 0                           | 0 Hypothetical protein (1)                                                  |                                                                                                                                                                                                                                                                                                                                                                               | Class I glutamine amidotransferase-like [IPRO29062] (1); Ribosomal protein L9, N-terminal [IPRO20070] (1); Ribosomal protein L9, C-terminal [IPRO20069] (1); Protein DJ-1 [IPRO06287] (1); DJ-1/Pip1 [IPRO02818] (1)                                                                                                                                                 |                              | scaffold_3_mRNA_4044.1   | -                            | - |
| GF0028647 | 1                           | 0                       | 0                           | 0 Hypothetical protein (1)                                                  |                                                                                                                                                                                                                                                                                                                                                                               |                                                                                                                                                                                                                                                                                                                                                                      |                              | scaffold_3_mRNA_4043.1   | -                            | - |
| GF0028646 | 1                           | 0                       | 0                           | 0 Retrotransposon protein, putative, Ty3-gypsy subclass (1)                 | nucleic acid binding [GO:0003676 molecular_function] (1)                                                                                                                                                                                                                                                                                                                      | Ribonuclease H-like domain [IPRO12337] (1); Aspartic peptidase domain [IPRO21109] (1)                                                                                                                                                                                                                                                                                |                              | scaffold_3_mRNA_4042.1   | -                            | - |
| GF0028645 | 1                           | 0                       | 0                           | 0 4-methyl-5(B-hydroxyethyl)-thiazole monophosphate biosynthesis (1)        |                                                                                                                                                                                                                                                                                                                                                                               | Class I glutamine amidotransferase-like [IPRO29062] (1); Protein DJ-1 [IPRO06287] (1); DJ-1/Pip1 [IPRO02818] (1)                                                                                                                                                                                                                                                     |                              | scaffold_3_mRNA_4037.1   | -                            | - |
| GF0028644 | 1                           | 0                       | 0                           | 0 4-methyl-5(B-hydroxyethyl)-thiazole monophosphate biosynthesis (1)        |                                                                                                                                                                                                                                                                                                                                                                               | DJ-1/Pip1 [IPRO02818] (1); Class I glutamine amidotransferase-like [IPRO29062] (1)                                                                                                                                                                                                                                                                                   |                              | scaffold_3_mRNA_4034.1   | -                            | - |
| GF0028643 | 1                           | 0                       | 0                           | 0 4-methyl-5(B-hydroxyethyl)-thiazole monophosphate biosynthesis (1)        |                                                                                                                                                                                                                                                                                                                                                                               | DJ-1/Pip1 [IPRO02818] (1); Class I glutamine amidotransferase-like [IPRO29062] (1)                                                                                                                                                                                                                                                                                   |                              | scaffold_3_mRNA_4032.1   | -                            | - |
| GF0028642 | 1                           | 0                       | 0                           | 0 4-methyl-5(B-hydroxyethyl)-thiazole monophosphate biosynthesis (1)        |                                                                                                                                                                                                                                                                                                                                                                               | DJ-1/Pip1 [IPRO02818] (1); Protein DJ-1 [IPRO06287] (1); Class I glutamine amidotransferase-like [IPRO29062] (1)                                                                                                                                                                                                                                                     |                              | scaffold_3_mRNA_4030.1   | -                            | - |
| GF0028641 | 1                           | 0                       | 0                           | 0 Class I glutamine amidotransferase-like superfamily protein isoform 1 (1) |                                                                                                                                                                                                                                                                                                                                                                               | DJ-1/Pip1 [IPRO02818] (1); Class I glutamine amidotransferase-like [IPRO29062] (1); Protein DJ-1 [IPRO06287] (1)                                                                                                                                                                                                                                                     |                              | scaffold_3_mRNA_4026.1   | -                            | - |
| GF0028640 | 1                           | 0                       | 0                           | 0 Hypothetical protein (1)                                                  |                                                                                                                                                                                                                                                                                                                                                                               | Protein kinase-like domain [IPRO11009] (1)                                                                                                                                                                                                                                                                                                                           |                              | scaffold_3_mRNA_4025.1   | -                            | - |
| GF0028639 | 1                           | 0                       | 0                           | 0 LRR receptor-like kinase family protein (1)                               | protein kinase activity [GO:0004672 molecular_function] (1); protein phosphorylation [GO:0006468 biological_process] (1); ATP binding [GO:0005524 molecular_function] (1); protein binding [GO:0005515 molecular_function] (1)                                                                                                                                                | Protein kinase domain [IPRO00719] (1); Leucine-rich repeat, typical subtype [IPRO03591] (1); Leucine-rich repeat domain, L domain-like [IPRO32675] (1); Protein kinase-like domain [IPRO11009] (1); Protein kinase, ATP binding site [IPRO17441] (1); Serine/threonine-protein kinase, active site [IPRO08271] (1); Leucine-rich repeat [IPRO01611] (1)              |                              | scaffold_3_mRNA_4024.1   | -                            | - |
| GF0028638 | 1                           | 0                       | 0                           | 0 LRR receptor-like kinase family protein (1)                               | protein binding [GO:0005515 molecular_function] (1); protein phosphorylation [GO:0006468 biological_process] (1); protein kinase activity [GO:0004672 molecular_function] (1); ATP binding [GO:0005524 molecular_function] (1)                                                                                                                                                | Serine/threonine-protein kinase, active site [IPRO08271] (1); Protein kinase, ATP binding site [IPRO17441] (1); Leucine-rich repeat [IPRO01611] (1); Protein kinase domain [IPRO00719] (1); Protein kinase-like domain [IPRO11009] (1); Leucine-rich repeat domain, L domain-like [IPRO32675] (1); Leucine-rich repeat, typical subtype [IPRO03591] (1)              |                              | scaffold_3_mRNA_4022.1   | -                            | - |
| GF0028637 | 1                           | 0                       | 0                           | 0 Class I glutamine amidotransferase superfamily protein (1)                |                                                                                                                                                                                                                                                                                                                                                                               | DJ-1/Pip1 [IPRO02818] (1); Protein DJ-1 [IPRO06287] (1); Class I glutamine amidotransferase-like [IPRO29062] (1)                                                                                                                                                                                                                                                     |                              | scaffold_3_mRNA_4019.1   | -                            | - |
| GF0028636 | 1                           | 0                       | 0                           | 0 Hypothetical protein (1)                                                  | DNA binding [GO:0003677 molecular_function] (1); nucleic acid binding [GO:0003676 molecular_function] (1)                                                                                                                                                                                                                                                                     | Zinc finger, BED-type [IPRO03656] (1); Zinc finger C2H2-type [IPRO13087] (1)                                                                                                                                                                                                                                                                                         |                              | scaffold_3_mRNA_4018.1   | -                            | - |
| GF0028635 | 1                           | 0                       | 0                           | 0 Hypothetical protein (1)                                                  | binding [GO:0005488 molecular_function] (1)                                                                                                                                                                                                                                                                                                                                   | Armadillo-like helical [IPRO11989] (1); Condensin complex subunit 1, C-terminal [IPRO32682] (1); Armadillo-type fold [IPRO16024] (1)                                                                                                                                                                                                                                 |                              | scaffold_3_mRNA_4015.1   | -                            | - |
| GF0028634 | 1                           | 0                       | 0                           | 0 Hypothetical protein (1)                                                  |                                                                                                                                                                                                                                                                                                                                                                               |                                                                                                                                                                                                                                                                                                                                                                      |                              | scaffold_3_mRNA_4014.1   | -                            | - |
| GF0028633 | 1                           | 0                       | 0                           | 0 Hypothetical protein (1)                                                  |                                                                                                                                                                                                                                                                                                                                                                               |                                                                                                                                                                                                                                                                                                                                                                      |                              | scaffold_3_mRNA_4013.1   | -                            | - |
| GF0028632 | 1                           | 0                       | 0                           | 0 Hypothetical protein (1)                                                  |                                                                                                                                                                                                                                                                                                                                                                               |                                                                                                                                                                                                                                                                                                                                                                      |                              | scaffold_3_mRNA_4011.1   | -                            | - |
| GF0028631 | 1                           | 0                       | 0                           | 0 Hypothetical protein (1)                                                  |                                                                                                                                                                                                                                                                                                                                                                               |                                                                                                                                                                                                                                                                                                                                                                      |                              | scaffold_3_mRNA_401.1    | -                            | - |
| GF0028630 | 1                           | 0                       | 0                           | 0 Hypothetical protein (1)                                                  |                                                                                                                                                                                                                                                                                                                                                                               |                                                                                                                                                                                                                                                                                                                                                                      |                              | scaffold_3_mRNA_4005.1   | -                            | - |
| GF0028629 | 1                           | 0                       | 0                           | 0 Hypothetical protein (1)                                                  | nucleic acid binding [GO:0003676 molecular_function] (1); zinc ion binding [GO:0008270 molecular_function] (1)                                                                                                                                                                                                                                                                | Viral movement protein [IPRO28919] (1); Zinc finger, CCHC-type [IPRO01878] (1)                                                                                                                                                                                                                                                                                       |                              | scaffold_3_mRNA_4001.1   | -                            | - |
| GF0028628 | 1                           | 0                       | 0                           | 0 Hypothetical protein (1)                                                  | nucleic acid binding [GO:0003676 molecular_function] (1); protein dimerization activity [GO:0046983 molecular_function] (1); sulfotransferase activity [GO:0008146 molecular_function] (1)                                                                                                                                                                                    | HAT, C-terminal dimerisation domain [IPRO0896] (1); P-loop containing nucleoside triphosphate hydrolase [IPRO27417] (1); Sulfotransferase domain [IPRO08863] (1); Ribonuclease H-like domain [IPRO12337] (1)                                                                                                                                                         |                              | scaffold_3_mRNA_3998.1   | -                            | - |
| GF0028627 | 1                           | 0                       | 0                           | 0 Mads box protein, putative (1)                                            | protein dimerization activity [GO:0046983 molecular_function] (1); DNA binding [GO:0003677 molecular_function] (1)                                                                                                                                                                                                                                                            | Transcription factor, MADS-box [IPRO02100] (1)                                                                                                                                                                                                                                                                                                                       |                              | scaffold_3_mRNA_3995.1   | -                            | - |

| ID        | Num. in <i>C. celerans</i> | Num. in <i>C. uchiha</i> | Num. in <i>P. trifoliate</i> | Note                                                         | GO                                                                                                                                                                                                                                                                                                                                                        | InterPro                                                                                                                                                                                                                                 | Members in <i>C. celerans</i> | Members in <i>C. uchiha</i> | Members in <i>P. trifoliate</i> |
|-----------|----------------------------|--------------------------|------------------------------|--------------------------------------------------------------|-----------------------------------------------------------------------------------------------------------------------------------------------------------------------------------------------------------------------------------------------------------------------------------------------------------------------------------------------------------|------------------------------------------------------------------------------------------------------------------------------------------------------------------------------------------------------------------------------------------|-------------------------------|-----------------------------|---------------------------------|
| GF0028626 | 1                          | 0                        | 0                            | MurA transferase2 (1)                                        | catalytic activity [GO:0003824 molecular_function] (1); UDP-N-acetylglucosamine 1-carboxyvinyltransferase activity [GO:0008760 molecular_function] (1); UDP-N-acetylglucosamine biosynthetic process [GO:0019277 biological_process] (1); transferase activity, transferring alkyl or aryl (other than methyl) groups [GO:0016765 molecular_function] (1) | Enolpyruvate transferase domain [IPR001986] (1); UDP-N-acetylglucosamine 1-carboxyvinyltransferase [IPR005750] (1); scaffold_3_mRNA_3994.1                                                                                               | -                             | -                           | -                               |
| GF0028625 | 1                          | 0                        | 0                            | MADS-box protein MADS2 (1)                                   | protein dimerization activity [GO:0046983 molecular_function] (1); DNA binding [GO:0003677 molecular_function] (1); zinc ion binding [GO:0008270 molecular_function] (1); nucleic acid binding [GO:0003676 molecular_function] (1)                                                                                                                        | Transcription factor, MADS-box [IPR02100] (1)                                                                                                                                                                                            | scaffold_3_mRNA_3993.1        | -                           | -                               |
| GF0028624 | 1                          | 0                        | 0                            | Hypothetical protein (1)                                     |                                                                                                                                                                                                                                                                                                                                                           | Zinc finger, CCHC-type [IPR001878] (1)                                                                                                                                                                                                   | scaffold_3_mRNA_3988.1        | -                           | -                               |
| GF0028623 | 1                          | 0                        | 0                            | Hypothetical protein (1)                                     |                                                                                                                                                                                                                                                                                                                                                           |                                                                                                                                                                                                                                          | scaffold_3_mRNA_3983.1        | -                           | -                               |
| GF0028622 | 1                          | 0                        | 0                            | Hypothetical protein (1)                                     |                                                                                                                                                                                                                                                                                                                                                           |                                                                                                                                                                                                                                          | scaffold_3_mRNA_3981.1        | -                           | -                               |
| GF0028621 | 1                          | 0                        | 0                            | Hypothetical protein (1)                                     |                                                                                                                                                                                                                                                                                                                                                           |                                                                                                                                                                                                                                          | scaffold_3_mRNA_3977.1        | -                           | -                               |
| GF0028620 | 1                          | 0                        | 0                            | Hypothetical protein (1)                                     |                                                                                                                                                                                                                                                                                                                                                           |                                                                                                                                                                                                                                          | scaffold_3_mRNA_3976.1        | -                           | -                               |
| GF0028619 | 1                          | 0                        | 0                            | Hypothetical protein (1)                                     |                                                                                                                                                                                                                                                                                                                                                           |                                                                                                                                                                                                                                          | scaffold_3_mRNA_3975.1        | -                           | -                               |
| GF0028618 | 1                          | 0                        | 0                            | Hypothetical protein (1)                                     |                                                                                                                                                                                                                                                                                                                                                           | Myb/SANT-like domain [IPR024752] (1)                                                                                                                                                                                                     | scaffold_3_mRNA_3972.1        | -                           | -                               |
| GF0028617 | 1                          | 0                        | 0                            | Hypothetical protein (1)                                     |                                                                                                                                                                                                                                                                                                                                                           |                                                                                                                                                                                                                                          | scaffold_3_mRNA_3967.1        | -                           | -                               |
| GF0028616 | 1                          | 0                        | 0                            | Hypothetical protein (1)                                     |                                                                                                                                                                                                                                                                                                                                                           |                                                                                                                                                                                                                                          | scaffold_3_mRNA_3940.1        | -                           | -                               |
| GF0028615 | 1                          | 0                        | 0                            | Hypothetical protein (1)                                     |                                                                                                                                                                                                                                                                                                                                                           | Retransposon gag domain [IPR005162] (1)                                                                                                                                                                                                  | scaffold_3_mRNA_3938.1        | -                           | -                               |
| GF0028614 | 1                          | 0                        | 0                            | Hypothetical protein (1)                                     |                                                                                                                                                                                                                                                                                                                                                           |                                                                                                                                                                                                                                          | scaffold_3_mRNA_3926.1        | -                           | -                               |
| GF0028613 | 1                          | 0                        | 0                            | Hypothetical protein (1)                                     |                                                                                                                                                                                                                                                                                                                                                           |                                                                                                                                                                                                                                          | scaffold_3_mRNA_3925.1        | -                           | -                               |
| GF0028612 | 1                          | 0                        | 0                            | Ankyrin repeat protein (1)                                   |                                                                                                                                                                                                                                                                                                                                                           | Ankyrin repeat-containing domain [IPR020683] (1); PGF domain [IPR026961] (1)                                                                                                                                                             | scaffold_3_mRNA_3924.1        | -                           | -                               |
| GF0028611 | 1                          | 0                        | 0                            | Hypothetical protein (1)                                     |                                                                                                                                                                                                                                                                                                                                                           |                                                                                                                                                                                                                                          | scaffold_3_mRNA_3920.1        | -                           | -                               |
| GF0028610 | 1                          | 0                        | 0                            | Hypothetical protein (1)                                     |                                                                                                                                                                                                                                                                                                                                                           |                                                                                                                                                                                                                                          | scaffold_3_mRNA_3919.1        | -                           | -                               |
| GF0028609 | 1                          | 0                        | 0                            | Hypothetical protein (1)                                     | zinc ion binding [GO:0008270 molecular_function] (1)                                                                                                                                                                                                                                                                                                      | Zinc finger, SWIM-type [IPR007527] (1); Zinc finger, PMZ-type [IPR006564] (1)                                                                                                                                                            | scaffold_3_mRNA_3918.1        | -                           | -                               |
| GF0028608 | 1                          | 0                        | 0                            | Hypothetical protein (1)                                     | proteolysis [GO:0006508 biological_process] (1); protein binding [GO:0005515 molecular_function] (1); cysteine-type peptidase activity [GO:0008234 molecular_function] (1)                                                                                                                                                                                | Ulp1 protease family, C-terminal catalytic domain [IPR016533] (1); Tetratricopeptide-like helical domain [IPR011990] (1); Tetratricopeptide repeat-containing domain [IPR013026] (1)                                                     | scaffold_3_mRNA_3917.1        | -                           | -                               |
| GF0028607 | 1                          | 0                        | 0                            | Putative RNA-directed DNA polymerase (1)                     | nucleic acid binding [GO:0003676 molecular_function] (1)                                                                                                                                                                                                                                                                                                  | Domain of unknown function DUF4283 [IPR025588] (1); Ribonuclease H-like domain [IPR012337] (1); Reverse transcriptase domain [IPR004771] (1); Endonuclease/exonuclease/phosphatase [IPR005135] (1)                                       | scaffold_3_mRNA_3916.1        | -                           | -                               |
| GF0028606 | 1                          | 0                        | 0                            | Hypothetical protein (1)                                     | protein binding [GO:0005515 molecular_function] (1)                                                                                                                                                                                                                                                                                                       | Ankyrin repeat-containing domain [IPR020683] (1); Ankyrin repeat [IPR002110] (1)                                                                                                                                                         | scaffold_3_mRNA_3914.1        | -                           | -                               |
| GF0028605 | 1                          | 0                        | 0                            | Hypothetical protein (1)                                     | protein binding [GO:0005515 molecular_function] (1)                                                                                                                                                                                                                                                                                                       | Ankyrin repeat [IPR002110] (1); Ankyrin repeat-containing domain [IPR020683] (1)                                                                                                                                                         | scaffold_3_mRNA_3910.1        | -                           | -                               |
| GF0028604 | 1                          | 0                        | 0                            | Hypothetical protein (1)                                     | protein binding [GO:0005515 molecular_function] (1)                                                                                                                                                                                                                                                                                                       | Tetratricopeptide-like helical domain [IPR011990] (1)                                                                                                                                                                                    | scaffold_3_mRNA_3907.1        | -                           | -                               |
| GF0028603 | 1                          | 0                        | 0                            | Hypothetical protein (1)                                     | protein binding [GO:0005515 molecular_function] (1)                                                                                                                                                                                                                                                                                                       | Ankyrin repeat-containing domain [IPR020683] (1); Ankyrin repeat [IPR002110] (1)                                                                                                                                                         | scaffold_3_mRNA_3906.1        | -                           | -                               |
| GF0028602 | 1                          | 0                        | 0                            | Hypothetical protein (1)                                     |                                                                                                                                                                                                                                                                                                                                                           |                                                                                                                                                                                                                                          | scaffold_3_mRNA_3905.1        | -                           | -                               |
| GF0028601 | 1                          | 0                        | 0                            | Hypothetical protein (1)                                     | protein binding [GO:0005515 molecular_function] (1); cysteine-type peptidase activity [GO:0008234 molecular_function] (1); proteolysis [GO:0006508 biological_process] (1)                                                                                                                                                                                | Tetratricopeptide-like helical domain [IPR011990] (1); Ulp1 protease family, C-terminal catalytic domain [IPR016533] (1)                                                                                                                 | scaffold_3_mRNA_3903.1        | -                           | -                               |
| GF0028600 | 1                          | 0                        | 0                            | Cell division cycle protein 16 putative (1)                  | Protein binding [GO:0005515 molecular_function] (1)                                                                                                                                                                                                                                                                                                       | Tetratricopeptide repeat [IPR019734] (1); Tetratricopeptide repeat-containing domain [IPR013026] (1); Tetratricopeptide-like helical domain [IPR011990] (1); Tetratricopeptide repeat 1 [IPR001440] (1)                                  | scaffold_3_mRNA_3901.1        | -                           | -                               |
| GF0028599 | 1                          | 0                        | 0                            | Hypothetical protein (1)                                     | nucleic acid binding [GO:0003676 molecular_function] (1); RNA-DNA hybrid ribonuclease activity [GO:0004523 molecular_function] (1)                                                                                                                                                                                                                        | Ribonuclease H domain [IPR002156] (1); Ribonuclease H-like domain [IPR012337] (1); Domain of unknown function DUF4283 [IPR025588] (1)                                                                                                    | scaffold_3_mRNA_3897.1        | -                           | -                               |
| GF0028598 | 1                          | 0                        | 0                            | Hypothetical protein (1)                                     | nutrient reservoir activity [GO:0045735 molecular_function] (1); manganese ion binding [GO:0030145 molecular_function] (1)                                                                                                                                                                                                                                | RmlC-like jelly roll fold [IPR014710] (1); Germin [IPR001929] (1); Germin, manganese binding site [IPR019780] (1); Cupin 1 [IPR006045] (1); Pentatricopeptide repeat [IPR002885] (1); RmlC-like cupin domain [IPR011051] (1)             | scaffold_3_mRNA_3896.1        | -                           | -                               |
| GF0028597 | 1                          | 0                        | 0                            | Hypothetical protein (1)                                     |                                                                                                                                                                                                                                                                                                                                                           | RmlC-like jelly roll fold [IPR014710] (1); RmlC-like cupin domain [IPR011051] (1)                                                                                                                                                        | scaffold_3_mRNA_3891.1        | -                           | -                               |
| GF0028596 | 1                          | 0                        | 0                            | Oxalate oxidase (1)                                          |                                                                                                                                                                                                                                                                                                                                                           | RmlC-like jelly roll fold [IPR014710] (1); RmlC-like cupin domain [IPR011051] (1)                                                                                                                                                        | scaffold_3_mRNA_3889.1        | -                           | -                               |
| GF0028595 | 1                          | 0                        | 0                            | Germin-like protein subfamily 1 member 7 (1)                 | manganese ion binding [GO:0030145 molecular_function] (1); nutrient reservoir activity [GO:0045735 molecular_function] (1)                                                                                                                                                                                                                                | RmlC-like cupin domain [IPR011051] (1); Germin [IPR001929] (1); RmlC-like jelly roll fold [IPR014710] (1); Cupin 1 [IPR006045] (1); Germin, manganese binding site [IPR019780] (1)                                                       | scaffold_3_mRNA_3885.1        | -                           | -                               |
| GF0028594 | 1                          | 0                        | 0                            | Ribonuclease H protein (1)                                   |                                                                                                                                                                                                                                                                                                                                                           | Reverse transcriptase zinc-binding domain [IPR026960] (1)                                                                                                                                                                                | scaffold_3_mRNA_3884.1        | -                           | -                               |
| GF0028593 | 1                          | 0                        | 0                            | Germin-like protein subfamily 1 member 7 (1)                 | manganese ion binding [GO:0030145 molecular_function] (1); nutrient reservoir activity [GO:0045735 molecular_function] (1)                                                                                                                                                                                                                                | RmlC-like cupin domain [IPR011051] (1); Germin, manganese binding site [IPR019780] (1); Cupin 1 [IPR006045] (1); RmlC-like jelly roll fold [IPR014710] (1); Germin [IPR001929] (1)                                                       | scaffold_3_mRNA_3880.1        | -                           | -                               |
| GF0028592 | 1                          | 0                        | 0                            | RNA-dependent RNA polymerase 6 (1)                           | RNA-directed 5'-3' RNA polymerase activity [GO:0003968 molecular_function] (1)                                                                                                                                                                                                                                                                            | RNA-dependent RNA polymerase, eukaryotic-type [IPR007855] (1); Protein kinase-like domain [IPR01009] (1)                                                                                                                                 | scaffold_3_mRNA_3871.1        | -                           | -                               |
| GF0028591 | 1                          | 0                        | 0                            | Hypothetical protein (1)                                     | RNA-directed 5'-3' RNA polymerase activity [GO:0003968 molecular_function] (1)                                                                                                                                                                                                                                                                            | RNA-dependent RNA polymerase, eukaryotic-type [IPR007855] (1); Arabidopsis retrotransposon Ori1 [IPR004312] (1)                                                                                                                          | scaffold_3_mRNA_3870.1        | -                           | -                               |
| GF0028590 | 1                          | 0                        | 0                            | Hypothetical protein (1)                                     | lipid metabolic process [GO:0006229 biological_process] (1); phosphorylation [GO:0006106 biological_process] (1)                                                                                                                                                                                                                                          | Formin, FH2 domain [IPR015425] (1); Alpha Beta hydrolase fold [IPR029058] (1); signal transduction response regulator, receiver domain [IPR001789] (1); CheY-like superfamily [IPR011006] (1); Fungal lipase-like domain [IPR029211] (1) | scaffold_3_mRNA_387.1         | -                           | -                               |
| GF0028589 | 1                          | 0                        | 0                            | Hypothetical protein (1)                                     |                                                                                                                                                                                                                                                                                                                                                           |                                                                                                                                                                                                                                          | scaffold_3_mRNA_3869.1        | -                           | -                               |
| GF0028588 | 1                          | 0                        | 0                            | Hypothetical protein (1)                                     | sigma factor antagonist activity [GO:0016989 molecular_function] (1)                                                                                                                                                                                                                                                                                      | Anti sigma-E protein RseA, N-terminal [IPR005572] (1)                                                                                                                                                                                    | scaffold_3_mRNA_3863.1        | -                           | -                               |
| GF0028587 | 1                          | 0                        | 0                            | Hypothetical protein (1)                                     |                                                                                                                                                                                                                                                                                                                                                           |                                                                                                                                                                                                                                          | scaffold_3_mRNA_3862.1        | -                           | -                               |
| GF0028586 | 1                          | 0                        | 0                            | Cytosolic ribosome 5'-monophosphate phosphoribohydrolase (1) |                                                                                                                                                                                                                                                                                                                                                           | LOG family [IPR031100] (1)                                                                                                                                                                                                               | scaffold_3_mRNA_3860.1        | -                           | -                               |
| GF0028585 | 1                          | 0                        | 0                            | Hypothetical protein (1)                                     |                                                                                                                                                                                                                                                                                                                                                           |                                                                                                                                                                                                                                          | scaffold_3_mRNA_3859.1        | -                           | -                               |
| GF0028584 | 1                          | 0                        | 0                            | Trypsin inhibitor (1)                                        | endopeptidase inhibitor activity [GO:0004866 molecular_function] (1)                                                                                                                                                                                                                                                                                      | Proteinase inhibitor I3, Kunitz legume [IPR002160] (1); Kunitz inhibitor ST1-like [IPR011065] (1)                                                                                                                                        | scaffold_3_mRNA_3841.1        | -                           | -                               |
| GF0028583 | 1                          | 0                        | 0                            | Hypothetical protein (1)                                     |                                                                                                                                                                                                                                                                                                                                                           |                                                                                                                                                                                                                                          | scaffold_3_mRNA_3840.1        | -                           | -                               |
| GF0028582 | 1                          | 0                        | 0                            | Hypothetical protein (1)                                     |                                                                                                                                                                                                                                                                                                                                                           |                                                                                                                                                                                                                                          | scaffold_3_mRNA_384.1         | -                           | -                               |
| GF0028581 | 1                          | 0                        | 0                            | Hypothetical protein (1)                                     |                                                                                                                                                                                                                                                                                                                                                           |                                                                                                                                                                                                                                          | scaffold_3_mRNA_3837.1        | -                           | -                               |
| GF0028580 | 1                          | 0                        | 0                            | Cytosolic ribosome 5'-monophosphate phosphoribohydrolase (1) |                                                                                                                                                                                                                                                                                                                                                           | LOG family [IPR031100] (1)                                                                                                                                                                                                               | scaffold_3_mRNA_3836.1        | -                           | -                               |
| GF0028579 | 1                          | 0                        | 0                            | Hypothetical protein (1)                                     |                                                                                                                                                                                                                                                                                                                                                           |                                                                                                                                                                                                                                          | scaffold_3_mRNA_3835.1        | -                           | -                               |
| GF0028578 | 1                          | 0                        | 0                            | Hypothetical protein (1)                                     |                                                                                                                                                                                                                                                                                                                                                           |                                                                                                                                                                                                                                          | scaffold_3_mRNA_3831.1        | -                           | -                               |
| GF0028577 | 1                          | 0                        | 0                            | Hypothetical protein (1)                                     |                                                                                                                                                                                                                                                                                                                                                           |                                                                                                                                                                                                                                          | scaffold_3_mRNA_3830.1        | -                           | -                               |
| GF0028576 | 1                          | 0                        | 0                            | Hypothetical protein (1)                                     |                                                                                                                                                                                                                                                                                                                                                           |                                                                                                                                                                                                                                          | scaffold_3_mRNA_3829.1        | -                           | -                               |
| GF0028575 | 1                          | 0                        | 0                            | Hypothetical protein (1)                                     |                                                                                                                                                                                                                                                                                                                                                           |                                                                                                                                                                                                                                          | scaffold_3_mRNA_3828.1        | -                           | -                               |
| GF0028574 | 1                          | 0                        | 0                            | Glycerol kinase (1)                                          | carbohydrate metabolic process [GO:0005975 biological_process] (1); phosphotransferase activity, alcohol group as acceptor [GO:0016773 molecular_function] (1)                                                                                                                                                                                            | Carbohydrate kinase, FGGY, C-terminal [IPR018485] (1); Carbohydrate kinase, FGGY, N-terminal [IPR018484] (1)                                                                                                                             | scaffold_3_mRNA_3825.1        | -                           | -                               |

| ID        | Num. in <i>C. clementinae</i> | Num. in <i>C. uchiha</i> | Num. in <i>P. trifoliata</i> | Note                                                                | GO                                                                                                                                                                                                                             | InterPro                                                                                                                                                                                                                                                                                                                                                                                                                            | Members in <i>C. clementinae</i> | Members in <i>C. uchiha</i> | Members in <i>P. trifoliata</i> |
|-----------|-------------------------------|--------------------------|------------------------------|---------------------------------------------------------------------|--------------------------------------------------------------------------------------------------------------------------------------------------------------------------------------------------------------------------------|-------------------------------------------------------------------------------------------------------------------------------------------------------------------------------------------------------------------------------------------------------------------------------------------------------------------------------------------------------------------------------------------------------------------------------------|----------------------------------|-----------------------------|---------------------------------|
| GF0028573 | 1                             | 0                        | 0                            | 0 Receptor like protein 21 (1)                                      | nucleic acid binding [GO:0003676 molecular_function] (1); protein dimerization activity [GO:0046983 molecular_function] (1); protein binding [GO:0005515 molecular_function] (1)                                               | Leucine-rich repeat [IPR001611] (1); Leucine-rich repeat-containing N-terminal, plant-type [IPR013210] (1); HAT, C-terminal dimerisation domain [IPR008906] (1); Leucine-rich repeat domain, L domain-like [IPR032675] (1); Leucine-rich repeat, cysteine-containing subtype [IPR06553] (1); Leucine rich repeat 4 [IPR025875] (1); Ribonuclease H-like domain [IPR012337] (1)                                                      | scaffold_3_mRNA_3823.1           | -                           | -                               |
| GF0028572 | 1                             | 0                        | 0                            | 0 Hypothetical protein (1)                                          |                                                                                                                                                                                                                                |                                                                                                                                                                                                                                                                                                                                                                                                                                     | scaffold_3_mRNA_3821.1           | -                           | -                               |
| GF0028571 | 1                             | 0                        | 0                            | 0 Hypothetical protein (1)                                          |                                                                                                                                                                                                                                |                                                                                                                                                                                                                                                                                                                                                                                                                                     | scaffold_3_mRNA_3819.1           | -                           | -                               |
| GF0028570 | 1                             | 0                        | 0                            | 0 Hypothetical protein (1)                                          |                                                                                                                                                                                                                                |                                                                                                                                                                                                                                                                                                                                                                                                                                     | scaffold_3_mRNA_3818.1           | -                           | -                               |
| GF0028569 | 1                             | 0                        | 0                            | 0 Uncharacterized mitochondrial protein AMg0310 (1)                 |                                                                                                                                                                                                                                |                                                                                                                                                                                                                                                                                                                                                                                                                                     | scaffold_3_mRNA_3816.1           | -                           | -                               |
| GF0028568 | 1                             | 0                        | 0                            | 0 Hypothetical protein (1)                                          |                                                                                                                                                                                                                                |                                                                                                                                                                                                                                                                                                                                                                                                                                     | scaffold_3_mRNA_3814.1           | -                           | -                               |
| GF0028567 | 1                             | 0                        | 0                            | 0 Hypothetical protein (1)                                          |                                                                                                                                                                                                                                | Aspartic peptidase domain [IPR021109] (1)                                                                                                                                                                                                                                                                                                                                                                                           | scaffold_3_mRNA_3813.1           | -                           | -                               |
| GF0028566 | 1                             | 0                        | 0                            | 0 Hypothetical protein (1)                                          |                                                                                                                                                                                                                                |                                                                                                                                                                                                                                                                                                                                                                                                                                     | scaffold_3_mRNA_3811.1           | -                           | -                               |
| GF0028565 | 1                             | 0                        | 0                            | 0 Hypothetical protein (1)                                          |                                                                                                                                                                                                                                | Aspartic peptidase domain [IPR021109] (1)                                                                                                                                                                                                                                                                                                                                                                                           | scaffold_3_mRNA_3810.1           | -                           | -                               |
| GF0028564 | 1                             | 0                        | 0                            | 0 Type I proteinase inhibitor-like protein (1)                      | response to wounding [GO:0009611 biological_process] (1); serine-type endopeptidase inhibitor activity [GO:0004867 molecular_function] (1)                                                                                     | Proteinase inhibitor H13, potato inhibitor 1 [IPR000864] (1)                                                                                                                                                                                                                                                                                                                                                                        | scaffold_3_mRNA_3806.1           | -                           | -                               |
| GF0028563 | 1                             | 0                        | 0                            | 0 Hypothetical protein (1)                                          |                                                                                                                                                                                                                                |                                                                                                                                                                                                                                                                                                                                                                                                                                     | scaffold_3_mRNA_3805.1           | -                           | -                               |
| GF0028562 | 1                             | 0                        | 0                            | 0 Type I proteinase inhibitor-like protein (1)                      | response to wounding [GO:0009611 biological_process] (1); serine-type endopeptidase inhibitor activity [GO:0004867 molecular_function] (1)                                                                                     | Proteinase inhibitor H13, potato inhibitor 1 [IPR000864] (1)                                                                                                                                                                                                                                                                                                                                                                        | scaffold_3_mRNA_3804.1           | -                           | -                               |
| GF0028561 | 1                             | 0                        | 0                            | 0 Hypothetical protein (1)                                          |                                                                                                                                                                                                                                |                                                                                                                                                                                                                                                                                                                                                                                                                                     | scaffold_3_mRNA_3801.1           | -                           | -                               |
| GF0028560 | 1                             | 0                        | 0                            | 0 Hypothetical protein (1)                                          |                                                                                                                                                                                                                                |                                                                                                                                                                                                                                                                                                                                                                                                                                     | scaffold_3_mRNA_3799.1           | -                           | -                               |
| GF0028559 | 1                             | 0                        | 0                            | 0 ULP0481 protein (1)                                               |                                                                                                                                                                                                                                | Protein of unknown function DUF247, plant [IPR004158] (1)                                                                                                                                                                                                                                                                                                                                                                           | scaffold_3_mRNA_3796.1           | -                           | -                               |
| GF0028558 | 1                             | 0                        | 0                            | 0 Hypothetical protein (1)                                          |                                                                                                                                                                                                                                |                                                                                                                                                                                                                                                                                                                                                                                                                                     | scaffold_3_mRNA_3791.1           | -                           | -                               |
| GF0028557 | 1                             | 0                        | 0                            | 0 Type I proteinase inhibitor-like protein (1)                      | serine-type endopeptidase inhibitor activity [GO:0004867 molecular_function] (1); response to wounding [GO:0009611 biological_process] (1)                                                                                     | Proteinase inhibitor H13, potato inhibitor 1 [IPR000864] (1)                                                                                                                                                                                                                                                                                                                                                                        | scaffold_3_mRNA_3790.1           | -                           | -                               |
| GF0028556 | 1                             | 0                        | 0                            | 0 Hypothetical protein (1)                                          |                                                                                                                                                                                                                                | Retrosposon gag domain [IPR05162] (1)                                                                                                                                                                                                                                                                                                                                                                                               | scaffold_3_mRNA_3788.1           | -                           | -                               |
| GF0028555 | 1                             | 0                        | 0                            | 0 Hypothetical protein (1)                                          |                                                                                                                                                                                                                                |                                                                                                                                                                                                                                                                                                                                                                                                                                     | scaffold_3_mRNA_3787.1           | -                           | -                               |
| GF0028554 | 1                             | 0                        | 0                            | 0 Hypothetical protein (1)                                          |                                                                                                                                                                                                                                |                                                                                                                                                                                                                                                                                                                                                                                                                                     | scaffold_3_mRNA_3786.1           | -                           | -                               |
| GF0028553 | 1                             | 0                        | 0                            | 0 Putative rnaDR family transposase-like (1)                        | zinc ion binding [GO:0008270 molecular_function] (1)                                                                                                                                                                           | Zinc finger, SWIM-type [IPR007527] (1); MULE transposase domain [IPR018289] (1); Zinc finger, PMZ-type [IPR006564] (1)                                                                                                                                                                                                                                                                                                              | scaffold_3_mRNA_3783.1           | -                           | -                               |
| GF0028552 | 1                             | 0                        | 0                            | 0 Hypothetical protein (1)                                          |                                                                                                                                                                                                                                |                                                                                                                                                                                                                                                                                                                                                                                                                                     | scaffold_3_mRNA_3782.1           | -                           | -                               |
| GF0028551 | 1                             | 0                        | 0                            | 0 LRR receptor-like kinase family protein (1)                       | ATP binding [GO:0005524 molecular_function] (1); protein kinase activity [GO:0004672 molecular_function] (1); protein phosphorylation [GO:0006468 biological_process] (1); protein binding [GO:0005515 molecular_function] (1) | Serine/threonine/tyrosine-protein kinase, catalytic domain [IPR001245] (1); Protein kinase, ATP binding site [IPR017441] (1); Serine/threonine-protein kinase, active site [IPR008271] (1); Leucine-rich repeat [IPR001611] (1); Protein kinase domain [IPR000719] (1); Leucine-rich repeat, typical subtype [IPR003591] (1); Leucine-rich repeat domain, L domain-like [IPR032675] (1); Protein kinase-like domain [IPR011009] (1) | scaffold_3_mRNA_3775.1           | -                           | -                               |
| GF0028550 | 1                             | 0                        | 0                            | 0 Hypothetical protein (1)                                          | nucleic acid binding [GO:0003676 molecular_function] (1)                                                                                                                                                                       | RNA recognition motif domain [IPR000504] (1)                                                                                                                                                                                                                                                                                                                                                                                        | scaffold_3_mRNA_3769.1           | -                           | -                               |
| GF0028549 | 1                             | 0                        | 0                            | 0 LRR receptor-like serine/threonine-protein kinase GSO1 (1)        | protein binding [GO:0005515 molecular_function] (1)                                                                                                                                                                            | Leucine-rich repeat [IPR001611] (1); Leucine-rich repeat-containing N-terminal, plant-type [IPR013210] (1); Leucine-rich repeat, typical subtype [IPR003591] (1); Leucine-rich repeat domain, L domain-like [IPR032675] (1)                                                                                                                                                                                                         | scaffold_3_mRNA_3768.1           | -                           | -                               |
| GF0028548 | 1                             | 0                        | 0                            | 0 Hypothetical protein (1)                                          |                                                                                                                                                                                                                                |                                                                                                                                                                                                                                                                                                                                                                                                                                     | scaffold_3_mRNA_3763.1           | -                           | -                               |
| GF0028547 | 1                             | 0                        | 0                            | 0 Hypothetical protein (1)                                          |                                                                                                                                                                                                                                |                                                                                                                                                                                                                                                                                                                                                                                                                                     | scaffold_3_mRNA_3755.1           | -                           | -                               |
| GF0028546 | 1                             | 0                        | 0                            | 0 Hypothetical protein (1)                                          |                                                                                                                                                                                                                                |                                                                                                                                                                                                                                                                                                                                                                                                                                     | scaffold_3_mRNA_3753.1           | -                           | -                               |
| GF0028545 | 1                             | 0                        | 0                            | 0 Hypothetical protein (1)                                          |                                                                                                                                                                                                                                |                                                                                                                                                                                                                                                                                                                                                                                                                                     | scaffold_3_mRNA_3750.1           | -                           | -                               |
| GF0028544 | 1                             | 0                        | 0                            | 0 Hypothetical protein (1)                                          |                                                                                                                                                                                                                                | Viral movement protein [IPR028919] (1)                                                                                                                                                                                                                                                                                                                                                                                              | scaffold_3_mRNA_3749.1           | -                           | -                               |
| GF0028543 | 1                             | 0                        | 0                            | 0 Hypothetical protein (1)                                          |                                                                                                                                                                                                                                |                                                                                                                                                                                                                                                                                                                                                                                                                                     | scaffold_3_mRNA_3741.1           | -                           | -                               |
| GF0028542 | 1                             | 0                        | 0                            | 0 Hypothetical protein (1)                                          |                                                                                                                                                                                                                                |                                                                                                                                                                                                                                                                                                                                                                                                                                     | scaffold_3_mRNA_3739.1           | -                           | -                               |
| GF0028541 | 1                             | 0                        | 0                            | 0 Hypothetical protein (1)                                          |                                                                                                                                                                                                                                | GAG-pre-integrase domain [IPR025724] (1)                                                                                                                                                                                                                                                                                                                                                                                            | scaffold_3_mRNA_3738.1           | -                           | -                               |
| GF0028540 | 1                             | 0                        | 0                            | 0 LRR receptor-like kinase (1)                                      | protein kinase activity [GO:0004672 molecular_function] (1); protein phosphorylation [GO:0006468 biological_process] (1); ATP binding [GO:0005524 molecular_function] (1)                                                      | Protein kinase domain [IPR000719] (1); Leucine-rich repeat domain, L domain-like [IPR032675] (1); Protein kinase-like domain [IPR011009] (1); Serine/threonine/tyrosine-protein kinase, catalytic domain [IPR001245] (1); Maleacin [IPR021720] (1); Serine/threonine-protein kinase, active site [IPR008271] (1)                                                                                                                    | scaffold_3_mRNA_3736.1           | -                           | -                               |
| GF0028539 | 1                             | 0                        | 0                            | 0 Hypothetical protein (1)                                          |                                                                                                                                                                                                                                | Transposon, En/Spm-like [IPR004242] (1)                                                                                                                                                                                                                                                                                                                                                                                             | scaffold_3_mRNA_3735.1           | -                           | -                               |
| GF0028538 | 1                             | 0                        | 0                            | 0 Hypothetical protein (1)                                          |                                                                                                                                                                                                                                |                                                                                                                                                                                                                                                                                                                                                                                                                                     | scaffold_3_mRNA_3734.1           | -                           | -                               |
| GF0028537 | 1                             | 0                        | 0                            | 0 Hypothetical protein (1)                                          |                                                                                                                                                                                                                                |                                                                                                                                                                                                                                                                                                                                                                                                                                     | scaffold_3_mRNA_3730.1           | -                           | -                               |
| GF0028536 | 1                             | 0                        | 0                            | 0 Serine/threonine-protein phosphatase PP2A-1 catalytic subunit (1) | hydrolase activity [GO:0016787 molecular_function] (1)                                                                                                                                                                         | Serine/threonine-specific protein phosphatase/hist(5-nucleosyl)-tetraphosphatase [IPR006186] (1); Calcineurin-like phosphoesterase domain, Agast type [IPR008482] (1); Metallo-dependent phosphatase-like [IPR029052] (1)                                                                                                                                                                                                           | scaffold_3_mRNA_3731.1           | -                           | -                               |
| GF0028535 | 1                             | 0                        | 0                            | 0 Hypothetical protein (1)                                          |                                                                                                                                                                                                                                |                                                                                                                                                                                                                                                                                                                                                                                                                                     | scaffold_3_mRNA_3729.1           | -                           | -                               |
| GF0028534 | 1                             | 0                        | 0                            | 0 Retrosposon gag protein (1)                                       |                                                                                                                                                                                                                                | Retrosposon gag domain [IPR05162] (1)                                                                                                                                                                                                                                                                                                                                                                                               | scaffold_3_mRNA_3728.1           | -                           | -                               |
| GF0028533 | 1                             | 0                        | 0                            | 0 Cytokinin riboside 5'-monophosphate phosphoribohydrolase (1)      |                                                                                                                                                                                                                                | LOG family [IPR031100] (1)                                                                                                                                                                                                                                                                                                                                                                                                          | scaffold_3_mRNA_3727.1           | -                           | -                               |
| GF0028532 | 1                             | 0                        | 0                            | 0 Hypothetical protein (1)                                          |                                                                                                                                                                                                                                |                                                                                                                                                                                                                                                                                                                                                                                                                                     | scaffold_3_mRNA_3725.1           | -                           | -                               |
| GF0028531 | 1                             | 0                        | 0                            | 0 LRR receptor-like kinase (1)                                      | ATP binding [GO:0005524 molecular_function] (1); protein phosphorylation [GO:0006468 biological_process] (1); protein kinase activity [GO:0004672 molecular_function] (1)                                                      | Maleacin [IPR021720] (1); Serine/threonine-protein kinase, active site [IPR008271] (1); Protein kinase-like domain [IPR011009] (1); Leucine-rich repeat domain, L domain-like [IPR032675] (1); Protein kinase domain [IPR000719] (1)                                                                                                                                                                                                | scaffold_3_mRNA_3724.1           | -                           | -                               |
| GF0028530 | 1                             | 0                        | 0                            | 0 LRR receptor-like kinase (1)                                      | ATP binding [GO:0005524 molecular_function] (1); protein phosphorylation [GO:0006468 biological_process] (1); protein kinase activity [GO:0004672 molecular_function] (1)                                                      | Maleacin [IPR021720] (1); Serine/threonine/tyrosine-protein kinase, catalytic domain [IPR001245] (1); Serine/threonine-protein kinase, active site [IPR008271] (1); Protein kinase domain [IPR000719] (1); Leucine-rich repeat domain, L domain-like [IPR032675] (1); Protein kinase-like domain [IPR011009] (1)                                                                                                                    | scaffold_3_mRNA_3721.1           | -                           | -                               |
| GF0028529 | 1                             | 0                        | 0                            | 0 Hypothetical protein (1)                                          |                                                                                                                                                                                                                                |                                                                                                                                                                                                                                                                                                                                                                                                                                     | scaffold_3_mRNA_3707.1           | -                           | -                               |
| GF0028528 | 1                             | 0                        | 0                            | 0 Hypothetical protein (1)                                          |                                                                                                                                                                                                                                |                                                                                                                                                                                                                                                                                                                                                                                                                                     | scaffold_3_mRNA_3706.1           | -                           | -                               |
| GF0028527 | 1                             | 0                        | 0                            | 0 Hypothetical protein (1)                                          |                                                                                                                                                                                                                                |                                                                                                                                                                                                                                                                                                                                                                                                                                     | scaffold_3_mRNA_3705.1           | -                           | -                               |
| GF0028526 | 1                             | 0                        | 0                            | 0 Hypothetical protein (1)                                          | nucleic acid binding [GO:0003676 molecular_function] (1)                                                                                                                                                                       | Ribonuclease H-like domain [IPR012337] (1)                                                                                                                                                                                                                                                                                                                                                                                          | scaffold_3_mRNA_3703.1           | -                           | -                               |
| GF0028525 | 1                             | 0                        | 0                            | 0 Hypothetical protein (1)                                          |                                                                                                                                                                                                                                |                                                                                                                                                                                                                                                                                                                                                                                                                                     | scaffold_3_mRNA_3699.1           | -                           | -                               |
| GF0028524 | 1                             | 0                        | 0                            | 0 Hypothetical protein (1)                                          |                                                                                                                                                                                                                                | Isopenicillin N synthase-like [IPR027443] (1)                                                                                                                                                                                                                                                                                                                                                                                       | scaffold_3_mRNA_3691.1           | -                           | -                               |
| GF0028523 | 1                             | 0                        | 0                            | 0 Hypothetical protein (1)                                          |                                                                                                                                                                                                                                |                                                                                                                                                                                                                                                                                                                                                                                                                                     | scaffold_3_mRNA_3688.1           | -                           | -                               |
| GF0028522 | 1                             | 0                        | 0                            | 0 ZOG-Fe(II) oxygenase family oxidoreductase (1)                    |                                                                                                                                                                                                                                | Isopenicillin N synthase-like [IPR027443] (1); Non-haem dixygenase N-terminal domain [IPR026992] (1)                                                                                                                                                                                                                                                                                                                                | scaffold_3_mRNA_3687.1           | -                           | -                               |
| GF0028521 | 1                             | 0                        | 0                            | 0 Senescence-related gene 1 (1)                                     | oxidation-reduction process [GO:0055114 biological_process] (1); oxidoreductase activity [GO:0016491 molecular_function] (1)                                                                                                   | Oroglutarate/iron-dependent dioxygenase [IPR05123] (1); Non-haem dixygenase N-terminal domain [IPR026992] (1); Isopenicillin N synthase-like [IPR027443] (1)                                                                                                                                                                                                                                                                        | scaffold_3_mRNA_3684.1           | -                           | -                               |
| GF0028520 | 1                             | 0                        | 0                            | 0 Hypothetical protein (1)                                          |                                                                                                                                                                                                                                |                                                                                                                                                                                                                                                                                                                                                                                                                                     | scaffold_3_mRNA_3682.1           | -                           | -                               |
| GF0028519 | 1                             | 0                        | 0                            | 0 ZOG-Fe(II) oxygenase family oxidoreductase (1)                    | oxidoreductase activity [GO:0016491 molecular_function] (1); oxidation-reduction process [GO:0055114 biological_process] (1)                                                                                                   | Oroglutarate/iron-dependent dioxygenase [IPR05123] (1); Isopenicillin N synthase-like [IPR027443] (1)                                                                                                                                                                                                                                                                                                                               | scaffold_3_mRNA_3680.1           | -                           | -                               |

| ID        | Num in <i>C. caryophyllata</i> | Num in <i>C. uchiha</i> | Num in <i>P. trifoliata</i> | Note                                                           | GO                                                                                                                                                                                                                                                                                                                                                                             | InterPro                                                                                                                                                                                                                                                                                                                                          | Members in <i>C. caryophyllata</i> | Members in <i>C. uchiha</i> | Members in <i>P. trifoliata</i> |
|-----------|--------------------------------|-------------------------|-----------------------------|----------------------------------------------------------------|--------------------------------------------------------------------------------------------------------------------------------------------------------------------------------------------------------------------------------------------------------------------------------------------------------------------------------------------------------------------------------|---------------------------------------------------------------------------------------------------------------------------------------------------------------------------------------------------------------------------------------------------------------------------------------------------------------------------------------------------|------------------------------------|-----------------------------|---------------------------------|
| GF0028518 | 1                              | 0                       | 0                           | 0 Senescence-related gene 1 (1)                                | oxidoreductase activity [GO:0016491 molecular_function] (1); oxidation-reduction process [GO:0055114 biological_process] (1)                                                                                                                                                                                                                                                   | Non-haem dixygenase N-terminal domain [IPRO26992] (1); hemoepicilin N synthase-like [IPRO27443] (1); Oooglutarate/iron-dependent dixygenase [IPRO05123] (1)                                                                                                                                                                                       | scaffold_3_mRNA_3679.1             | -                           | -                               |
| GF0028517 | 1                              | 0                       | 0                           | 0 Hypothetical protein (1)                                     |                                                                                                                                                                                                                                                                                                                                                                                |                                                                                                                                                                                                                                                                                                                                                   | scaffold_3_mRNA_3671.1             | -                           | -                               |
| GF0028516 | 1                              | 0                       | 0                           | 0 Hypothetical protein (1)                                     |                                                                                                                                                                                                                                                                                                                                                                                |                                                                                                                                                                                                                                                                                                                                                   | scaffold_3_mRNA_3664.1             | -                           | -                               |
| GF0028515 | 1                              | 0                       | 0                           | 0 Hypothetical protein (1)                                     |                                                                                                                                                                                                                                                                                                                                                                                |                                                                                                                                                                                                                                                                                                                                                   | scaffold_3_mRNA_3659.1             | -                           | -                               |
| GF0028514 | 1                              | 0                       | 0                           | 0 Hypothetical protein (1)                                     |                                                                                                                                                                                                                                                                                                                                                                                |                                                                                                                                                                                                                                                                                                                                                   | scaffold_3_mRNA_3656.1             | -                           | -                               |
| GF0028513 | 1                              | 0                       | 0                           | 0 Hypothetical protein (1)                                     | cysteine-type peptidase activity [GO:0008234 molecular_function] (1); proteolysis [GO:0006508 biological_process] (1)                                                                                                                                                                                                                                                          | Ulp1 protease family, C-terminal catalytic domain [IPRO03653] (1)                                                                                                                                                                                                                                                                                 | scaffold_3_mRNA_3655.1             | -                           | -                               |
| GF0028512 | 1                              | 0                       | 0                           | 0 LRR receptor-like kinase (1)                                 | protein binding [GO:0005515 molecular_function] (1); protein kinase activity [GO:0004672 molecular_function] (1); protein phosphorylation [GO:0006468 biological_process] (1); ATP binding [GO:0005524 molecular_function] (1)                                                                                                                                                 | Leucine-rich repeat domain, L domain-like [IPRO32675] (1); Protein kinase domain [IPRO11009] (1); Protein kinase domain [IPRO0719] (1); Leucine-rich repeat [IPRO01611] (1); Serine/threonine-protein kinase, active site [IPRO08271] (1); Serine/threonine/tyrosine-protein kinase, catalytic domain [IPRO01245] (1); Malvaceae [IPRO073770] (1) | scaffold_3_mRNA_3644.1             | -                           | -                               |
| GF0028511 | 1                              | 0                       | 0                           | 0 Hypothetical protein (1)                                     | RNA-directed 5'-3' RNA polymerase activity [GO:0003968 molecular_function] (1)                                                                                                                                                                                                                                                                                                 | RNA-dependent RNA polymerase, eukaryotic-type [IPRO07855] (1)                                                                                                                                                                                                                                                                                     | scaffold_3_mRNA_3642.1             | -                           | -                               |
| GF0028510 | 1                              | 0                       | 0                           | 0 Cytokinin riboside 5'-monophosphate phosphoribohydrolase (1) | nucleic acid binding [GO:0003676 molecular_function] (1); regulation of transcription, DNA-templated [GO:0006355 biological_process] (1)                                                                                                                                                                                                                                       | LOG family [IPRO03100] (1)                                                                                                                                                                                                                                                                                                                        | scaffold_3_mRNA_3638.1             | -                           | -                               |
| GF0028509 | 1                              | 0                       | 0                           | 0 Hypothetical protein (1)                                     | nucleic acid binding [GO:0003676 molecular_function] (1); regulation of transcription, DNA-templated [GO:0006355 biological_process] (1)                                                                                                                                                                                                                                       | Carbavirus nucleic acid-binding protein [IPRO02568] (1)                                                                                                                                                                                                                                                                                           | scaffold_3_mRNA_3637.1             | -                           | -                               |
| GF0028508 | 1                              | 0                       | 0                           | 0 Phosphate import ATP-binding PstB 2 (1)                      |                                                                                                                                                                                                                                                                                                                                                                                | Retrotransposon gag domain [IPRO05162] (1)                                                                                                                                                                                                                                                                                                        | scaffold_3_mRNA_3634.1             | -                           | -                               |
| GF0028507 | 1                              | 0                       | 0                           | 0 Hypothetical protein (1)                                     |                                                                                                                                                                                                                                                                                                                                                                                |                                                                                                                                                                                                                                                                                                                                                   | scaffold_3_mRNA_3630.1             | -                           | -                               |
| GF0028506 | 1                              | 0                       | 0                           | 0 Hypothetical protein (1)                                     | nucleic acid binding [GO:0003676 molecular_function] (1); zinc ion binding [GO:0008270 molecular_function] (1)                                                                                                                                                                                                                                                                 | Zinc finger, CCHC-type [IPRO01878] (1)                                                                                                                                                                                                                                                                                                            | scaffold_3_mRNA_3628.1             | -                           | -                               |
| GF0028505 | 1                              | 0                       | 0                           | 0 Secologanin synthase (1)                                     | oxidation-reduction process [GO:0055114 biological_process] (1); oxidoreductase activity, acting on paired donors, with incorporation or reduction of molecular oxygen [GO:0016705 molecular_function] (1); iron ion binding [GO:0005506 molecular_function] (1); heme binding [GO:0020037 molecular_function] (1); monooxygenase activity [GO:0004497 molecular_function] (1) | Cytochrome P450, conserved site [IPRO17972] (1); Cytochrome P450, E-class, group IV [IPRO02403] (1); Cytochrome P450 [IPRO01128] (1)                                                                                                                                                                                                              | scaffold_3_mRNA_3627.1             | -                           | -                               |
| GF0028504 | 1                              | 0                       | 0                           | 0 Hypothetical protein (1)                                     |                                                                                                                                                                                                                                                                                                                                                                                |                                                                                                                                                                                                                                                                                                                                                   | scaffold_3_mRNA_3625.1             | -                           | -                               |
| GF0028503 | 1                              | 0                       | 0                           | 0 Hypothetical protein (1)                                     |                                                                                                                                                                                                                                                                                                                                                                                | LOG family [IPRO03100] (1)                                                                                                                                                                                                                                                                                                                        | scaffold_3_mRNA_3622.1             | -                           | -                               |
| GF0028502 | 1                              | 0                       | 0                           | 0 Secologanin synthase (1)                                     | oxidation-reduction process [GO:0055114 biological_process] (1); oxidoreductase activity, acting on paired donors, with incorporation or reduction of molecular oxygen [GO:0016705 molecular_function] (1)                                                                                                                                                                     | Cytochrome P450 [IPRO01128] (1); Cytochrome P450, conserved site [IPRO17972] (1); Cytochrome P450, E-class, group I [IPRO02401] (1)                                                                                                                                                                                                               | scaffold_3_mRNA_3621.1             | -                           | -                               |
| GF0028501 | 1                              | 0                       | 0                           | 0 Hypothetical protein (1)                                     |                                                                                                                                                                                                                                                                                                                                                                                |                                                                                                                                                                                                                                                                                                                                                   | scaffold_3_mRNA_3620.1             | -                           | -                               |
| GF0028500 | 1                              | 0                       | 0                           | 0 Hypothetical protein (1)                                     |                                                                                                                                                                                                                                                                                                                                                                                |                                                                                                                                                                                                                                                                                                                                                   | scaffold_3_mRNA_3619.1             | -                           | -                               |
| GF0028499 | 1                              | 0                       | 0                           | 0 Hypothetical protein (1)                                     |                                                                                                                                                                                                                                                                                                                                                                                |                                                                                                                                                                                                                                                                                                                                                   | scaffold_3_mRNA_3618.1             | -                           | -                               |
| GF0028498 | 1                              | 0                       | 0                           | 0 Cytochrome P450 family 72 protein, putative (1)              | iron ion binding [GO:0005506 molecular_function] (1); heme binding [GO:0020037 molecular_function] (1); oxidation-reduction process [GO:0055114 biological_process] (1); oxidoreductase activity, acting on paired donors, with incorporation or reduction of molecular oxygen [GO:0016705 molecular_function] (1)                                                             | Cytochrome P450 [IPRO01128] (1)                                                                                                                                                                                                                                                                                                                   | scaffold_3_mRNA_3616.1             | -                           | -                               |
| GF0028497 | 1                              | 0                       | 0                           | 0 Hypothetical protein (1)                                     |                                                                                                                                                                                                                                                                                                                                                                                |                                                                                                                                                                                                                                                                                                                                                   | scaffold_3_mRNA_3610.1             | -                           | -                               |
| GF0028496 | 1                              | 0                       | 0                           | 0 Oxalate oxidase 2 (1)                                        | manganese ion binding [GO:0030145 molecular_function] (1); nutrient reservoir activity [GO:0045735 molecular_function] (1)                                                                                                                                                                                                                                                     | RmlC-like cupin domain [IPRO11051] (1); RmlC-like jelly roll fold [IPRO14710] (1); Germin [IPRO01929] (1); Cupin 1 [IPRO06045] (1)                                                                                                                                                                                                                | scaffold_3_mRNA_361.1              | -                           | -                               |
| GF0028495 | 1                              | 0                       | 0                           | 0 Zinc finger MYM-type protein 1 (1)                           |                                                                                                                                                                                                                                                                                                                                                                                |                                                                                                                                                                                                                                                                                                                                                   | scaffold_3_mRNA_3607.1             | -                           | -                               |
| GF0028494 | 1                              | 0                       | 0                           | 0 Hypothetical protein (1)                                     |                                                                                                                                                                                                                                                                                                                                                                                | Domain of unknown function DUF4371 [IPRO25398] (1)                                                                                                                                                                                                                                                                                                | scaffold_3_mRNA_3606.1             | -                           | -                               |
| GF0028493 | 1                              | 0                       | 0                           | 0 Cystine-rich RLK (RECEPTOR-like protein kinase) 8 (1)        |                                                                                                                                                                                                                                                                                                                                                                                | Reverse transcriptase, RNA-dependent DNA polymerase [IPRO13103] (1)                                                                                                                                                                                                                                                                               | scaffold_3_mRNA_3600.1             | -                           | -                               |
| GF0028492 | 1                              | 0                       | 0                           | 0 Hypothetical protein (1)                                     |                                                                                                                                                                                                                                                                                                                                                                                |                                                                                                                                                                                                                                                                                                                                                   | scaffold_3_mRNA_360.1              | -                           | -                               |
| GF0028491 | 1                              | 0                       | 0                           | 0 Hypothetical protein (1)                                     | nucleic acid binding [GO:0003676 molecular_function] (1)                                                                                                                                                                                                                                                                                                                       | Ribonuclease H-like domain [IPRO12337] (1)                                                                                                                                                                                                                                                                                                        | scaffold_3_mRNA_3599.1             | -                           | -                               |
| GF0028490 | 1                              | 0                       | 0                           | 0 Hypothetical protein (1)                                     |                                                                                                                                                                                                                                                                                                                                                                                |                                                                                                                                                                                                                                                                                                                                                   | scaffold_3_mRNA_3597.1             | -                           | -                               |
| GF0028489 | 1                              | 0                       | 0                           | 0 Hypothetical protein (1)                                     |                                                                                                                                                                                                                                                                                                                                                                                |                                                                                                                                                                                                                                                                                                                                                   | scaffold_3_mRNA_3596.1             | -                           | -                               |
| GF0028488 | 1                              | 0                       | 0                           | 0 Cytokinin riboside 5'-monophosphate phosphoribohydrolase (1) |                                                                                                                                                                                                                                                                                                                                                                                | LOG family [IPRO03100] (1)                                                                                                                                                                                                                                                                                                                        | scaffold_3_mRNA_3595.1             | -                           | -                               |
| GF0028487 | 1                              | 0                       | 0                           | 0 Cytokinin riboside 5'-monophosphate phosphoribohydrolase (1) |                                                                                                                                                                                                                                                                                                                                                                                | LOG family [IPRO03100] (1)                                                                                                                                                                                                                                                                                                                        | scaffold_3_mRNA_3594.1             | -                           | -                               |
| GF0028486 | 1                              | 0                       | 0                           | 0 RNA polymerase II C-terminal domain phosphatase-like 4 (1)   |                                                                                                                                                                                                                                                                                                                                                                                | HAD-like domain [IPRO22214] (1); BRCT domain [IPRO01357] (1); FCP1 homology domain [IPRO04274] (1)                                                                                                                                                                                                                                                | scaffold_3_mRNA_359.1              | -                           | -                               |
| GF0028485 | 1                              | 0                       | 0                           | 0 Hypothetical protein (1)                                     |                                                                                                                                                                                                                                                                                                                                                                                |                                                                                                                                                                                                                                                                                                                                                   | scaffold_3_mRNA_3586.1             | -                           | -                               |
| GF0028484 | 1                              | 0                       | 0                           | 0 Hypothetical protein (1)                                     | nucleic acid binding [GO:0003676 molecular_function] (1); zinc ion binding [GO:0008270 molecular_function] (1)                                                                                                                                                                                                                                                                 | Domain of unknown function DUF4219 [IPRO25314] (1); Zinc finger, CCHC-type [IPRO01878] (1); Leucine-rich repeat [IPRO01611] (1); Leucine-rich repeat-containing N-terminal, plant-type [IPRO12310] (1); Leucine-rich repeat domain, L domain-like [IPRO32675] (1); Leucine-rich repeat, typical subtype [IPRO03591] (1)                           | scaffold_3_mRNA_3585.1             | -                           | -                               |
| GF0028483 | 1                              | 0                       | 0                           | 0 Verticillium wilt disease resistance protein (1)             | protein binding [GO:0005515 molecular_function] (1)                                                                                                                                                                                                                                                                                                                            | Leucine-rich repeat [IPRO01611] (1); Leucine-rich repeat, typical subtype [IPRO03591] (1); Leucine-rich repeat domain, L domain-like [IPRO32675] (1)                                                                                                                                                                                              | scaffold_3_mRNA_3584.1             | -                           | -                               |
| GF0028482 | 1                              | 0                       | 0                           | 0 Hypothetical protein (1)                                     |                                                                                                                                                                                                                                                                                                                                                                                | Leucine-rich repeat, typical subtype [IPRO03591] (1); Leucine-rich repeat domain, L domain-like [IPRO32675] (1); Aspartic peptidase domain [IPRO21109] (1)                                                                                                                                                                                        | scaffold_3_mRNA_3582.1             | -                           | -                               |
| GF0028481 | 1                              | 0                       | 0                           | 0 Monosaccharide transport protein (1)                         |                                                                                                                                                                                                                                                                                                                                                                                |                                                                                                                                                                                                                                                                                                                                                   | scaffold_3_mRNA_3581.1             | -                           | -                               |
| GF0028480 | 1                              | 0                       | 0                           | 0 LRR receptor-like kinase (1)                                 | protein binding [GO:0005515 molecular_function] (1)                                                                                                                                                                                                                                                                                                                            | Leucine-rich repeat [IPRO01611] (1); Leucine-rich repeat, typical subtype [IPRO03591] (1); Leucine-rich repeat domain, L domain-like [IPRO32675] (1)                                                                                                                                                                                              | scaffold_3_mRNA_3580.1             | -                           | -                               |
| GF0028479 | 1                              | 0                       | 0                           | 0 Hypothetical protein (1)                                     |                                                                                                                                                                                                                                                                                                                                                                                |                                                                                                                                                                                                                                                                                                                                                   | scaffold_3_mRNA_3579.1             | -                           | -                               |
| GF0028478 | 1                              | 0                       | 0                           | 0 Hypothetical protein (1)                                     |                                                                                                                                                                                                                                                                                                                                                                                | Leucine-rich repeat domain, L domain-like [IPRO32675] (1)                                                                                                                                                                                                                                                                                         | scaffold_3_mRNA_3577.1             | -                           | -                               |
| GF0028477 | 1                              | 0                       | 0                           | 0 Cytokinin riboside 5'-monophosphate phosphoribohydrolase (1) |                                                                                                                                                                                                                                                                                                                                                                                | Cytokinin riboside 5'-monophosphate phosphoribohydrolase LOG [IPRO05269] (1); LOG family [IPRO03100] (1)                                                                                                                                                                                                                                          | scaffold_3_mRNA_3576.1             | -                           | -                               |
| GF0028476 | 1                              | 0                       | 0                           | 0 Hypothetical protein (1)                                     |                                                                                                                                                                                                                                                                                                                                                                                |                                                                                                                                                                                                                                                                                                                                                   | scaffold_3_mRNA_3573.1             | -                           | -                               |
| GF0028475 | 1                              | 0                       | 0                           | 0 Hypothetical protein (1)                                     |                                                                                                                                                                                                                                                                                                                                                                                | Aspartic peptidase domain [IPRO021109] (1); Retrotransposon gag domain [IPRO05162] (1)                                                                                                                                                                                                                                                            | scaffold_3_mRNA_3569.1             | -                           | -                               |
| GF0028474 | 1                              | 0                       | 0                           | 0 Putative methyltransferase PMT2 (1)                          | methyltransferase activity [GO:0008168 molecular_function] (1)                                                                                                                                                                                                                                                                                                                 | S-adenosyl-L-methionine-dependent methyltransferase [IPRO29062] (1); Putative S-adenosyl-L-methionine-dependent methyltransferase [IPRO04159] (1)                                                                                                                                                                                                 | scaffold_3_mRNA_3567.1             | -                           | -                               |
| GF0028473 | 1                              | 0                       | 0                           | 0 Verticillium wilt disease resistance protein (1)             | protein binding [GO:0005515 molecular_function] (1)                                                                                                                                                                                                                                                                                                                            | Leucine-rich repeat, typical subtype [IPRO03591] (1); Leucine-rich repeat domain, L domain-like [IPRO32675] (1); Leucine-rich repeat [IPRO01611] (1)                                                                                                                                                                                              | scaffold_3_mRNA_3565.1             | -                           | -                               |
| GF0028472 | 1                              | 0                       | 0                           | 0 Hypothetical protein (1)                                     |                                                                                                                                                                                                                                                                                                                                                                                | Retrotransposon gag domain [IPRO05162] (1)                                                                                                                                                                                                                                                                                                        | scaffold_3_mRNA_3564.1             | -                           | -                               |
| GF0028471 | 1                              | 0                       | 0                           | 0 Hypothetical protein (1)                                     |                                                                                                                                                                                                                                                                                                                                                                                | SOUL laem-binding protein [IPRO06917] (1)                                                                                                                                                                                                                                                                                                         | scaffold_3_mRNA_3561.1             | -                           | -                               |
| GF0028470 | 1                              | 0                       | 0                           | 0 Hypothetical protein (1)                                     |                                                                                                                                                                                                                                                                                                                                                                                |                                                                                                                                                                                                                                                                                                                                                   | scaffold_3_mRNA_3558.1             | -                           | -                               |
| GF0028469 | 1                              | 0                       | 0                           | 0 Hypothetical protein (1)                                     | regulation of transcription, DNA-templated [GO:0006355 biological_process] (1)                                                                                                                                                                                                                                                                                                 | MULE transposase domain [IPRO18289] (1); PHY3/FAR1 family [IPRO031052] (1)                                                                                                                                                                                                                                                                        | scaffold_3_mRNA_3552.1             | -                           | -                               |
| GF0028468 | 1                              | 0                       | 0                           | 0 Hypothetical protein (1)                                     |                                                                                                                                                                                                                                                                                                                                                                                |                                                                                                                                                                                                                                                                                                                                                   | scaffold_3_mRNA_3549.1             | -                           | -                               |
| GF0028467 | 1                              | 0                       | 0                           | 0 Hypothetical protein (1)                                     |                                                                                                                                                                                                                                                                                                                                                                                |                                                                                                                                                                                                                                                                                                                                                   | scaffold_3_mRNA_3543.1             | -                           | -                               |
| GF0028466 | 1                              | 0                       | 0                           | 0 Hypothetical protein (1)                                     |                                                                                                                                                                                                                                                                                                                                                                                |                                                                                                                                                                                                                                                                                                                                                   | scaffold_3_mRNA_3527.1             | -                           | -                               |
| GF0028465 | 1                              | 0                       | 0                           | 0 Putative ribonuclease H protein (1)                          | nucleic acid binding [GO:0003676 molecular_function] (1)                                                                                                                                                                                                                                                                                                                       | Reverse transcriptase zinc-binding domain [IPRO26960] (1); Ribonuclease H-like domain [IPRO12337] (1)                                                                                                                                                                                                                                             | scaffold_3_mRNA_3523.1             | -                           | -                               |
| GF0028464 | 1                              | 0                       | 0                           | 0 Hypothetical protein (1)                                     |                                                                                                                                                                                                                                                                                                                                                                                |                                                                                                                                                                                                                                                                                                                                                   | scaffold_3_mRNA_3515.1             | -                           | -                               |



| ID        | Num. in <i>C. clementinae</i> | Num. in <i>C. ustinii</i> | Num. in <i>P. trifoliata</i> | Note                                                           | GO                                                                                                                                                                                                                                                                                                                                                                         | InterPro                                                                                                                                                                                                                                                                                                                                                                                                                                                                                                                                                                                | Members in <i>C. clementinae</i> | Members in <i>C. ustinii</i> | Members in <i>P. trifoliata</i> |
|-----------|-------------------------------|---------------------------|------------------------------|----------------------------------------------------------------|----------------------------------------------------------------------------------------------------------------------------------------------------------------------------------------------------------------------------------------------------------------------------------------------------------------------------------------------------------------------------|-----------------------------------------------------------------------------------------------------------------------------------------------------------------------------------------------------------------------------------------------------------------------------------------------------------------------------------------------------------------------------------------------------------------------------------------------------------------------------------------------------------------------------------------------------------------------------------------|----------------------------------|------------------------------|---------------------------------|
| GF0028463 | 1                             | 0                         | 0                            | 0 Ac-like transposase (1)                                      | nucleic acid binding [GO:0003676 molecular_function] (1); DNA binding [GO:0003677 molecular_function] (1)                                                                                                                                                                                                                                                                  | Ribonuclease H-like domain [IPRO12337] (1); BAT-like transposase, RNase-H fold [IPRO25252] (1)                                                                                                                                                                                                                                                                                                                                                                                                                                                                                          | scaffold_3_mRNA_3514.1           | -                            | -                               |
| GF0028462 | 1                             | 0                         | 0                            | 0 Hypothetical protein (1)                                     | nucleic acid binding [GO:0003676 molecular_function] (1); zinc ion binding [GO:0008270 molecular_function] (1)                                                                                                                                                                                                                                                             | Zinc finger, CCHC-type [IPRO01878] (1)                                                                                                                                                                                                                                                                                                                                                                                                                                                                                                                                                  | scaffold_3_mRNA_3509.1           | -                            | -                               |
| GF0028461 | 1                             | 0                         | 0                            | 0 Glutathione transferase (1)                                  | protein binding [GO:0005515 molecular_function] (1)                                                                                                                                                                                                                                                                                                                        | Thioredoxin-like fold [IPRO12336] (1); Glutathione S-transferase, N-terminal [IPRO04045] (1); Glutathione S-transferase, C-terminal-like [IPRO10987] (1)                                                                                                                                                                                                                                                                                                                                                                                                                                | scaffold_3_mRNA_3505.1           | -                            | -                               |
| GF0028460 | 1                             | 0                         | 0                            | 0 Glutathione S-transferase 3 (1)                              | protein binding [GO:0005515 molecular_function] (1)                                                                                                                                                                                                                                                                                                                        | Glutathione S-transferase, N-terminal [IPRO04045] (1); Glutathione S-transferase, C-terminal-like [IPRO10987] (1); Thioredoxin-like fold [IPRO12336] (1)                                                                                                                                                                                                                                                                                                                                                                                                                                | scaffold_3_mRNA_3504.1           | -                            | -                               |
| GF0028459 | 1                             | 0                         | 0                            | 0 Cytokinin riboside 5'-monophosphate phosphoribohydrolase (1) |                                                                                                                                                                                                                                                                                                                                                                            | LOG family [IPRO31100] (1); Cytokinin riboside 5'-monophosphate phosphoribohydrolase LOG [IPRO05269] (1)                                                                                                                                                                                                                                                                                                                                                                                                                                                                                | scaffold_3_mRNA_3503.1           | -                            | -                               |
| GF0028458 | 1                             | 0                         | 0                            | 0 Hypothetical protein (1)                                     |                                                                                                                                                                                                                                                                                                                                                                            |                                                                                                                                                                                                                                                                                                                                                                                                                                                                                                                                                                                         | scaffold_3_mRNA_3496.1           | -                            | -                               |
| GF0028457 | 1                             | 0                         | 0                            | 0 Hypothetical protein (1)                                     |                                                                                                                                                                                                                                                                                                                                                                            |                                                                                                                                                                                                                                                                                                                                                                                                                                                                                                                                                                                         | scaffold_3_mRNA_3495.1           | -                            | -                               |
| GF0028456 | 1                             | 0                         | 0                            | 0 Hypothetical protein (1)                                     |                                                                                                                                                                                                                                                                                                                                                                            |                                                                                                                                                                                                                                                                                                                                                                                                                                                                                                                                                                                         | scaffold_3_mRNA_3493.1           | -                            | -                               |
| GF0028455 | 1                             | 0                         | 0                            | 0 Hypothetical protein (1)                                     |                                                                                                                                                                                                                                                                                                                                                                            |                                                                                                                                                                                                                                                                                                                                                                                                                                                                                                                                                                                         | scaffold_3_mRNA_3489.1           | -                            | -                               |
| GF0028454 | 1                             | 0                         | 0                            | 0 Cytokinin riboside 5'-monophosphate phosphoribohydrolase (1) |                                                                                                                                                                                                                                                                                                                                                                            | LOG family [IPRO31100] (1)                                                                                                                                                                                                                                                                                                                                                                                                                                                                                                                                                              | scaffold_3_mRNA_3487.1           | -                            | -                               |
| GF0028453 | 1                             | 0                         | 0                            | 0 Hypothetical protein (1)                                     |                                                                                                                                                                                                                                                                                                                                                                            | LOG family [IPRO31100] (1)                                                                                                                                                                                                                                                                                                                                                                                                                                                                                                                                                              | scaffold_3_mRNA_3481.1           | -                            | -                               |
| GF0028452 | 1                             | 0                         | 0                            | 0 Hypothetical protein (1)                                     |                                                                                                                                                                                                                                                                                                                                                                            |                                                                                                                                                                                                                                                                                                                                                                                                                                                                                                                                                                                         | scaffold_3_mRNA_3480.1           | -                            | -                               |
| GF0028451 | 1                             | 0                         | 0                            | 0 Hypothetical protein (1)                                     |                                                                                                                                                                                                                                                                                                                                                                            |                                                                                                                                                                                                                                                                                                                                                                                                                                                                                                                                                                                         | scaffold_3_mRNA_3479.1           | -                            | -                               |
| GF0028450 | 1                             | 0                         | 0                            | 0 Hypothetical protein (1)                                     |                                                                                                                                                                                                                                                                                                                                                                            |                                                                                                                                                                                                                                                                                                                                                                                                                                                                                                                                                                                         | scaffold_3_mRNA_3477.1           | -                            | -                               |
| GF0028449 | 1                             | 0                         | 0                            | 0 Hypothetical protein (1)                                     |                                                                                                                                                                                                                                                                                                                                                                            |                                                                                                                                                                                                                                                                                                                                                                                                                                                                                                                                                                                         | scaffold_3_mRNA_3475.1           | -                            | -                               |
| GF0028448 | 1                             | 0                         | 0                            | 0 Cytokinin riboside 5'-monophosphate phosphoribohydrolase (1) |                                                                                                                                                                                                                                                                                                                                                                            | LOG family [IPRO31100] (1); Cytokinin riboside 5'-monophosphate phosphoribohydrolase LOG [IPRO05269] (1)                                                                                                                                                                                                                                                                                                                                                                                                                                                                                | scaffold_3_mRNA_3474.1           | -                            | -                               |
| GF0028447 | 1                             | 0                         | 0                            | 0 Hypothetical protein (1)                                     |                                                                                                                                                                                                                                                                                                                                                                            |                                                                                                                                                                                                                                                                                                                                                                                                                                                                                                                                                                                         | scaffold_3_mRNA_3469.1           | -                            | -                               |
| GF0028446 | 1                             | 0                         | 0                            | 0 TMV resistance protein N (1)                                 | signal transduction [GO:0007165 biological_process] (1); ADP binding [GO:0043531 molecular_function] (1); protein binding [GO:0005515 molecular_function] (1)                                                                                                                                                                                                              | Toll/interleukin-1 receptor homology (TIR) domain [IPRO00157] (1); Leucine-rich repeat 3 [IPRO11713] (1); Winged helix-turn-helix DNA-binding domain [IPRO11991] (1); Leucine-rich repeat domain, L domain-like [IPRO32675] (1); Leucine-rich repeat, typical subtype [IPRO03591] (1); P-loop containing nucleoside triphosphate hydrolase [IPRO27417] (1); Leucine-rich repeat [IPRO01611] (1); NB-ARC [IPRO02182] (1)                                                                                                                                                                 | scaffold_3_mRNA_3468.1           | -                            | -                               |
| GF0028445 | 1                             | 0                         | 0                            | 0 Hypothetical protein (1)                                     | ADP binding [GO:0043531 molecular_function] (1)                                                                                                                                                                                                                                                                                                                            | P-loop containing nucleoside triphosphate hydrolase [IPRO27417] (1); NB-ARC [IPRO02182] (1); Winged helix-turn-helix DNA-binding domain [IPRO11991] (1)                                                                                                                                                                                                                                                                                                                                                                                                                                 | scaffold_3_mRNA_3467.1           | -                            | -                               |
| GF0028444 | 1                             | 0                         | 0                            | 0 Hypothetical protein (1)                                     | signal transduction [GO:0007165 biological_process] (1); ADP binding [GO:0043531 molecular_function] (1); protein binding [GO:0005515 molecular_function] (1)                                                                                                                                                                                                              | NB-ARC [IPRO02182] (1); P-loop containing nucleoside triphosphate hydrolase [IPRO27417] (1); Toll/interleukin-1 receptor homology (TIR) domain [IPRO00157] (1); Leucine-rich repeat [IPRO01611] (1); NB-ARC [IPRO02182] (1); P-loop containing nucleoside triphosphate hydrolase [IPRO27417] (1); Winged helix-turn-helix DNA-binding domain [IPRO11991] (1); Leucine-rich repeat domain, L domain-like [IPRO32675] (1); Leucine-rich repeat, typical subtype [IPRO03591] (1); Toll/interleukin-1 receptor homology (TIR) domain [IPRO00157] (1); Leucine-rich repeat 3 [IPRO11713] (1) | scaffold_3_mRNA_3466.1           | -                            | -                               |
| GF0028443 | 1                             | 0                         | 0                            | 0 TMV resistance protein N (1)                                 | ADP binding [GO:0043531 molecular_function] (1); signal transduction [GO:0007165 biological_process] (1); protein binding [GO:0005515 molecular_function] (1)                                                                                                                                                                                                              | NB-ARC [IPRO02182] (1); P-loop containing nucleoside triphosphate hydrolase [IPRO27417] (1); Winged helix-turn-helix DNA-binding domain [IPRO11991] (1); Leucine-rich repeat domain, L domain-like [IPRO32675] (1); Leucine-rich repeat, typical subtype [IPRO03591] (1); Toll/interleukin-1 receptor homology (TIR) domain [IPRO00157] (1); Leucine-rich repeat 3 [IPRO11713] (1)                                                                                                                                                                                                      | scaffold_3_mRNA_3461.1           | -                            | -                               |
| GF0028442 | 1                             | 0                         | 0                            | 0 Hypothetical protein (1)                                     |                                                                                                                                                                                                                                                                                                                                                                            |                                                                                                                                                                                                                                                                                                                                                                                                                                                                                                                                                                                         | scaffold_3_mRNA_3460.1           | -                            | -                               |
| GF0028441 | 1                             | 0                         | 0                            | 0 Hypothetical protein (1)                                     |                                                                                                                                                                                                                                                                                                                                                                            |                                                                                                                                                                                                                                                                                                                                                                                                                                                                                                                                                                                         | scaffold_3_mRNA_3455.1           | -                            | -                               |
| GF0028440 | 1                             | 0                         | 0                            | 0 Hypothetical protein (1)                                     |                                                                                                                                                                                                                                                                                                                                                                            |                                                                                                                                                                                                                                                                                                                                                                                                                                                                                                                                                                                         | scaffold_3_mRNA_3448.1           | -                            | -                               |
| GF0028439 | 1                             | 0                         | 0                            | 0 Hypothetical protein (1)                                     |                                                                                                                                                                                                                                                                                                                                                                            |                                                                                                                                                                                                                                                                                                                                                                                                                                                                                                                                                                                         | scaffold_3_mRNA_3446.1           | -                            | -                               |
| GF0028438 | 1                             | 0                         | 0                            | 0 Hypothetical protein (1)                                     |                                                                                                                                                                                                                                                                                                                                                                            |                                                                                                                                                                                                                                                                                                                                                                                                                                                                                                                                                                                         | scaffold_3_mRNA_3439.1           | -                            | -                               |
| GF0028437 | 1                             | 0                         | 0                            | 0 Accelerated cell death 6 (1)                                 | integral component of membrane [GO:0016021 cellular_component] (1); cellular response to salicylic acid stimulus [GO:0071446 biological_process] (1); protein binding [GO:0005515 molecular_function] (1); regulation of defense response [GO:0031347 biological_process] (1); regulation of salicylic acid mediated signaling pathway [GO:2000031 biological_process] (1) | Ankyrin repeat [IPRO02110] (1); Protein accelerated cell death 6 [IPRO32846] (1); PGD domain [IPRO26961] (1); Ankyrin repeat-containing domain [IPRO20683] (1)                                                                                                                                                                                                                                                                                                                                                                                                                          | scaffold_3_mRNA_3437.1           | -                            | -                               |
| GF0028436 | 1                             | 0                         | 0                            | 0 Hypothetical protein (1)                                     |                                                                                                                                                                                                                                                                                                                                                                            |                                                                                                                                                                                                                                                                                                                                                                                                                                                                                                                                                                                         | scaffold_3_mRNA_3436.1           | -                            | -                               |
| GF0028435 | 1                             | 0                         | 0                            | 0 TMV resistance protein N (1)                                 | signal transduction [GO:0007165 biological_process] (1); ADP binding [GO:0043531 molecular_function] (1); protein binding [GO:0005515 molecular_function] (1)                                                                                                                                                                                                              | Toll/interleukin-1 receptor homology (TIR) domain [IPRO00157] (1); Leucine-rich repeat domain, L domain-like [IPRO32675] (1); Winged helix-turn-helix DNA-binding domain [IPRO11991] (1); P-loop containing nucleoside triphosphate hydrolase [IPRO27417] (1); NB-ARC [IPRO02182] (1)                                                                                                                                                                                                                                                                                                   | scaffold_3_mRNA_3415.1           | -                            | -                               |
| GF0028434 | 1                             | 0                         | 0                            | 0 Hypothetical protein (1)                                     |                                                                                                                                                                                                                                                                                                                                                                            | Aspartic peptidase domain [IPRO21109] (1)                                                                                                                                                                                                                                                                                                                                                                                                                                                                                                                                               | scaffold_3_mRNA_3413.1           | -                            | -                               |
| GF0028433 | 1                             | 0                         | 0                            | 0 Cytokinin riboside 5'-monophosphate phosphoribohydrolase (1) |                                                                                                                                                                                                                                                                                                                                                                            | Cytokinin riboside 5'-monophosphate phosphoribohydrolase LOG [IPRO05269] (1); LOG family [IPRO31100] (1)                                                                                                                                                                                                                                                                                                                                                                                                                                                                                | scaffold_3_mRNA_3411.1           | -                            | -                               |
| GF0028432 | 1                             | 0                         | 0                            | 0 Hypothetical protein (1)                                     |                                                                                                                                                                                                                                                                                                                                                                            |                                                                                                                                                                                                                                                                                                                                                                                                                                                                                                                                                                                         | scaffold_3_mRNA_3410.1           | -                            | -                               |
| GF0028431 | 1                             | 0                         | 0                            | 0 TMV resistance protein N (1)                                 | protein binding [GO:0005515 molecular_function] (1); signal transduction [GO:0007165 biological_process] (1); ADP binding [GO:0043531 molecular_function] (1)                                                                                                                                                                                                              | Toll/interleukin-1 receptor homology (TIR) domain [IPRO00157] (1); Winged helix-turn-helix DNA-binding domain [IPRO11991] (1); Leucine-rich repeat domain, L domain-like [IPRO32675] (1); P-loop containing nucleoside triphosphate hydrolase [IPRO27417] (1); NB-ARC [IPRO02182] (1)                                                                                                                                                                                                                                                                                                   | scaffold_3_mRNA_3408.1           | -                            | -                               |
| GF0028430 | 1                             | 0                         | 0                            | 0 Hypothetical protein (1)                                     |                                                                                                                                                                                                                                                                                                                                                                            |                                                                                                                                                                                                                                                                                                                                                                                                                                                                                                                                                                                         | scaffold_3_mRNA_3405.1           | -                            | -                               |
| GF0028429 | 1                             | 0                         | 0                            | 0 Hypothetical protein (1)                                     |                                                                                                                                                                                                                                                                                                                                                                            |                                                                                                                                                                                                                                                                                                                                                                                                                                                                                                                                                                                         | scaffold_3_mRNA_3404.1           | -                            | -                               |
| GF0028428 | 1                             | 0                         | 0                            | 0 Disease resistance protein (TIR-NBS-LRR class) (1)           | signal transduction [GO:0007165 biological_process] (1); ADP binding [GO:0043531 molecular_function] (1); protein binding [GO:0005515 molecular_function] (1)                                                                                                                                                                                                              | Leucine-rich repeat [IPRO01611] (1); NB-ARC [IPRO02182] (1); P-loop containing nucleoside triphosphate hydrolase [IPRO27417] (1); Winged helix-turn-helix DNA-binding domain [IPRO11991] (1); Leucine-rich repeat domain, L domain-like [IPRO32675] (1); Toll/interleukin-1 receptor homology (TIR) domain [IPRO00157] (1)                                                                                                                                                                                                                                                              | scaffold_3_mRNA_3402.1           | -                            | -                               |
| GF0028427 | 1                             | 0                         | 0                            | 0 Hypothetical protein (1)                                     |                                                                                                                                                                                                                                                                                                                                                                            |                                                                                                                                                                                                                                                                                                                                                                                                                                                                                                                                                                                         | scaffold_3_mRNA_3400.1           | -                            | -                               |
| GF0028426 | 1                             | 0                         | 0                            | 0 Hypothetical protein (1)                                     |                                                                                                                                                                                                                                                                                                                                                                            |                                                                                                                                                                                                                                                                                                                                                                                                                                                                                                                                                                                         | scaffold_3_mRNA_3398.1           | -                            | -                               |
| GF0028425 | 1                             | 0                         | 0                            | 0 Hypothetical protein (1)                                     |                                                                                                                                                                                                                                                                                                                                                                            |                                                                                                                                                                                                                                                                                                                                                                                                                                                                                                                                                                                         | scaffold_3_mRNA_3397.1           | -                            | -                               |
| GF0028424 | 1                             | 0                         | 0                            | 0 TMV resistance protein N (1)                                 | ADP binding [GO:0043531 molecular_function] (1); signal transduction [GO:0007165 biological_process] (1); protein binding [GO:0005515 molecular_function] (1)                                                                                                                                                                                                              | Leucine-rich repeat 3 [IPRO11713] (1); Toll/interleukin-1 receptor homology (TIR) domain [IPRO00157] (1); Leucine-rich repeat domain, L domain-like [IPRO32675] (1); P-loop containing nucleoside triphosphate hydrolase [IPRO27417] (1); NB-ARC [IPRO02182] (1)                                                                                                                                                                                                                                                                                                                        | scaffold_3_mRNA_3396.1           | -                            | -                               |
| GF0028423 | 1                             | 0                         | 0                            | 0 Hypothetical protein (1)                                     |                                                                                                                                                                                                                                                                                                                                                                            | Galactose-binding domain-like [IPRO08979] (1)                                                                                                                                                                                                                                                                                                                                                                                                                                                                                                                                           | scaffold_3_mRNA_3395.1           | -                            | -                               |
| GF0028422 | 1                             | 0                         | 0                            | 0 Hypothetical protein (1)                                     |                                                                                                                                                                                                                                                                                                                                                                            |                                                                                                                                                                                                                                                                                                                                                                                                                                                                                                                                                                                         | scaffold_3_mRNA_3394.1           | -                            | -                               |
| GF0028421 | 1                             | 0                         | 0                            | 0 Hypothetical protein (1)                                     |                                                                                                                                                                                                                                                                                                                                                                            |                                                                                                                                                                                                                                                                                                                                                                                                                                                                                                                                                                                         | scaffold_3_mRNA_3390.1           | -                            | -                               |
| GF0028420 | 1                             | 0                         | 0                            | 0 Hypothetical protein (1)                                     |                                                                                                                                                                                                                                                                                                                                                                            |                                                                                                                                                                                                                                                                                                                                                                                                                                                                                                                                                                                         | scaffold_3_mRNA_3389.1           | -                            | -                               |

| ID        | Num. in <i>C. clementinae</i> | Num. in <i>C. uastha</i> | Num. in <i>P. trifoliata</i> | Note                                                            | GO                                                                                                                                                                                                                       | InterPro                                                                                                                                                                                                                                                                                                                                                                                                              | Members in <i>C. clementinae</i> | Members in <i>C. uastha</i> | Members in <i>P. trifoliata</i> |
|-----------|-------------------------------|--------------------------|------------------------------|-----------------------------------------------------------------|--------------------------------------------------------------------------------------------------------------------------------------------------------------------------------------------------------------------------|-----------------------------------------------------------------------------------------------------------------------------------------------------------------------------------------------------------------------------------------------------------------------------------------------------------------------------------------------------------------------------------------------------------------------|----------------------------------|-----------------------------|---------------------------------|
| GF0028419 | 1                             | 0                        | 0                            | Disease resistance protein (TIR-NBS-LRR class) (1)              | protein binding [GO:0005515 molecular_function] (1); ADP binding [GO:0043531 molecular_function] (1); signal transduction [GO:0007165 biological_process] (1)                                                            | P-loop containing nucleoside triphosphate hydrolase [IPR027417] (1); Leucine-rich repeat [IPR016111] (1); NB-ARC [IPR02182] (1); Toll-interleukin-1 receptor homology (TIR) domain [IPR00157] (1); Leucine-rich repeat 3 [IPR017113] (1); Leucine-rich repeat, typical subtype [IPR003591] (1); Leucine-rich repeat domain, L domain-like [IPR032675] (1); Winged helix-turn-helix DNA-binding domain [IPR011991] (1) | scaffold_3_mRNA_3381.1           | -                           | -                               |
| GF0028418 | 1                             | 0                        | 0                            | Hypothetical protein (1)                                        |                                                                                                                                                                                                                          |                                                                                                                                                                                                                                                                                                                                                                                                                       | scaffold_3_mRNA_3380.1           | -                           | -                               |
| GF0028417 | 1                             | 0                        | 0                            | Hypothetical protein (1)                                        |                                                                                                                                                                                                                          |                                                                                                                                                                                                                                                                                                                                                                                                                       | scaffold_3_mRNA_3378.1           | -                           | -                               |
| GF0028416 | 1                             | 0                        | 0                            | Disease resistance protein (TIR-NBS-LRR class) (1)              | protein binding [GO:0005515 molecular_function] (1); signal transduction [GO:0007165 biological_process] (1); ADP binding [GO:0043531 molecular_function] (1)                                                            | Leucine-rich repeat domain, L domain-like [IPR032675] (1); Leucine-rich repeat, typical subtype [IPR003591] (1); Winged helix-turn-helix DNA-binding domain [IPR011991] (1); Toll-interleukin-1 receptor homology (TIR) domain [IPR00157] (1); NB-ARC [IPR02182] (1); Leucine-rich repeat [IPR016111] (1); P-loop containing nucleoside triphosphate hydrolase [IPR027417] (1)                                        | scaffold_3_mRNA_3374.1           | -                           | -                               |
| GF0028415 | 1                             | 0                        | 0                            | Hypothetical protein (1)                                        |                                                                                                                                                                                                                          |                                                                                                                                                                                                                                                                                                                                                                                                                       | scaffold_3_mRNA_3372.1           | -                           | -                               |
| GF0028414 | 1                             | 0                        | 0                            | Hypothetical protein (1)                                        |                                                                                                                                                                                                                          |                                                                                                                                                                                                                                                                                                                                                                                                                       | scaffold_3_mRNA_3371.1           | -                           | -                               |
| GF0028413 | 1                             | 0                        | 0                            | Hypothetical protein (1)                                        |                                                                                                                                                                                                                          | Leucine-rich repeat domain, L domain-like [IPR032675] (1)                                                                                                                                                                                                                                                                                                                                                             | scaffold_3_mRNA_3369.1           | -                           | -                               |
| GF0028412 | 1                             | 0                        | 0                            | Hypothetical protein (1)                                        |                                                                                                                                                                                                                          |                                                                                                                                                                                                                                                                                                                                                                                                                       | scaffold_3_mRNA_3366.1           | -                           | -                               |
| GF0028411 | 1                             | 0                        | 0                            | Hypothetical protein (1)                                        |                                                                                                                                                                                                                          | Aspartic peptidase domain [IPR021109] (1)                                                                                                                                                                                                                                                                                                                                                                             | scaffold_3_mRNA_3363.1           | -                           | -                               |
| GF0028410 | 1                             | 0                        | 0                            | Hypothetical protein (1)                                        |                                                                                                                                                                                                                          |                                                                                                                                                                                                                                                                                                                                                                                                                       | scaffold_3_mRNA_3362.1           | -                           | -                               |
| GF0028409 | 1                             | 0                        | 0                            | Hypothetical protein (1)                                        | protein binding [GO:0005515 molecular_function] (1)                                                                                                                                                                      | Leucine-rich repeat-containing N-terminal, plant-type [IPR015210] (1); Leucine-rich repeat [IPR016111] (1); Leucine-rich repeat domain, L domain-like [IPR032675] (1)                                                                                                                                                                                                                                                 | scaffold_3_mRNA_3356.1           | -                           | -                               |
| GF0028408 | 1                             | 0                        | 0                            | Monosaccharide transport protein (1)                            |                                                                                                                                                                                                                          |                                                                                                                                                                                                                                                                                                                                                                                                                       | scaffold_3_mRNA_3353.1           | -                           | -                               |
| GF0028407 | 1                             | 0                        | 0                            | Hypothetical protein (1)                                        |                                                                                                                                                                                                                          |                                                                                                                                                                                                                                                                                                                                                                                                                       | scaffold_3_mRNA_3352.1           | -                           | -                               |
| GF0028406 | 1                             | 0                        | 0                            | Hypothetical protein (1)                                        |                                                                                                                                                                                                                          |                                                                                                                                                                                                                                                                                                                                                                                                                       | scaffold_3_mRNA_3346.1           | -                           | -                               |
| GF0028405 | 1                             | 0                        | 0                            | LRR receptor-like kinase (1)                                    |                                                                                                                                                                                                                          | Leucine-rich repeat domain, L domain-like [IPR032675] (1)                                                                                                                                                                                                                                                                                                                                                             | scaffold_3_mRNA_3344.1           | -                           | -                               |
| GF0028404 | 1                             | 0                        | 0                            | Hypothetical protein (1)                                        |                                                                                                                                                                                                                          |                                                                                                                                                                                                                                                                                                                                                                                                                       | scaffold_3_mRNA_3339.1           | -                           | -                               |
| GF0028403 | 1                             | 0                        | 0                            | Hypothetical protein (1)                                        | nucleic acid binding [GO:0003676 molecular_function] (1)                                                                                                                                                                 | Ribonuclease H-like domain [IPR01237] (1)                                                                                                                                                                                                                                                                                                                                                                             | scaffold_3_mRNA_3337.1           | -                           | -                               |
| GF0028402 | 1                             | 0                        | 0                            | Hypothetical protein (1)                                        |                                                                                                                                                                                                                          | Leucine-rich repeat domain, L domain-like [IPR032675] (1)                                                                                                                                                                                                                                                                                                                                                             | scaffold_3_mRNA_3336.1           | -                           | -                               |
| GF0028401 | 1                             | 0                        | 0                            | Hypothetical protein (1)                                        |                                                                                                                                                                                                                          | Domain of unknown function DUF4219 [IPR025314] (1)                                                                                                                                                                                                                                                                                                                                                                    | scaffold_3_mRNA_3329.1           | -                           | -                               |
| GF0028400 | 1                             | 0                        | 0                            | Monosaccharide transport protein (1)                            |                                                                                                                                                                                                                          |                                                                                                                                                                                                                                                                                                                                                                                                                       | scaffold_3_mRNA_3325.1           | -                           | -                               |
| GF0028399 | 1                             | 0                        | 0                            | Hypothetical protein (1)                                        |                                                                                                                                                                                                                          |                                                                                                                                                                                                                                                                                                                                                                                                                       | scaffold_3_mRNA_3324.1           | -                           | -                               |
| GF0028398 | 1                             | 0                        | 0                            | Hypothetical protein (1)                                        |                                                                                                                                                                                                                          |                                                                                                                                                                                                                                                                                                                                                                                                                       | scaffold_3_mRNA_3323.1           | -                           | -                               |
| GF0028397 | 1                             | 0                        | 0                            | Hypothetical protein (1)                                        |                                                                                                                                                                                                                          |                                                                                                                                                                                                                                                                                                                                                                                                                       | scaffold_3_mRNA_3319.1           | -                           | -                               |
| GF0028396 | 1                             | 0                        | 0                            | UDP-glycosyltransferase 74E2 (1)                                | metabolic process [GO:0008152 biological_process] (1); transferase activity, transferring hexosyl groups [GO:0016758 molecular_function] (1)                                                                             | UDP-glucuronosylUDP-glucosyltransferase [IPR002213] (1)                                                                                                                                                                                                                                                                                                                                                               | scaffold_3_mRNA_3318.1           | -                           | -                               |
| GF0028395 | 1                             | 0                        | 0                            | Hypothetical protein (1)                                        | ribosome [GO:0005840 cellular_component] (1); translation [GO:0006412 biological_process] (1); intracellular [GO:0005622 cellular_component] (1); structural constituent of ribosome [GO:0003735 molecular_function] (1) | Ribosomal protein L2, domain 3 [IPR014726] (1); Ribosomal protein L2, C-terminal [IPR022669] (1); Ribosomal protein L2 [IPR02171] (1); Translation protein SH3-like domain [IPR008991] (1)                                                                                                                                                                                                                            | scaffold_3_mRNA_3315.1           | -                           | -                               |
| GF0028394 | 1                             | 0                        | 0                            | Hypothetical protein (1)                                        |                                                                                                                                                                                                                          |                                                                                                                                                                                                                                                                                                                                                                                                                       | scaffold_3_mRNA_3308.1           | -                           | -                               |
| GF0028393 | 1                             | 0                        | 0                            | Hypothetical protein (1)                                        |                                                                                                                                                                                                                          |                                                                                                                                                                                                                                                                                                                                                                                                                       | scaffold_3_mRNA_3306.1           | -                           | -                               |
| GF0028392 | 1                             | 0                        | 0                            | LRR and NB-ARC domain disease resistance protein (1)            | oxidation-reduction process [GO:005514 biological_process] (1); ADP binding [GO:0043531 molecular_function] (1)                                                                                                          | Alcohol dehydrogenase, C-terminal [IPR013149] (1); Winged helix-turn-helix DNA-binding domain [IPR011991] (1); Leucine-rich repeat domain, L domain-like [IPR032675] (1); Receptor-L domain [IPR004094] (1); NAD(P)-binding domain [IPR016040] (1); P-loop containing nucleoside triphosphate hydrolase [IPR027417] (1); NB-ARC [IPR02182] (1)                                                                        | scaffold_3_mRNA_3302.1           | -                           | -                               |
| GF0028391 | 1                             | 0                        | 0                            | LRR and NB-ARC domain disease resistance protein (1)            | ADP binding [GO:0043531 molecular_function] (1)                                                                                                                                                                          | Winged helix-turn-helix DNA-binding domain [IPR011991] (1); Leucine-rich repeat domain, L domain-like [IPR032675] (1); P-loop containing nucleoside triphosphate hydrolase [IPR027417] (1); NB-ARC [IPR02182] (1)                                                                                                                                                                                                     | scaffold_3_mRNA_3301.1           | -                           | -                               |
| GF0028390 | 1                             | 0                        | 0                            | Mutator-like transposase (1)                                    | zinc ion binding [GO:0008270 molecular_function] (1)                                                                                                                                                                     | Transposase, MuDR, plant [IPR004332] (1); MULE transposase domain [IPR018289] (1); Zinc finger, PMZ-type [IPR006564] (1); Zinc finger, SWIM-type [IPR007527] (1)                                                                                                                                                                                                                                                      | scaffold_3_mRNA_3299.1           | -                           | -                               |
| GF0028389 | 1                             | 0                        | 0                            | Hypothetical protein (1)                                        | proteolysis [GO:0006508 biological_process] (1); cysteine-type peptidase activity [GO:0008234 molecular_function] (1); ADP binding [GO:0043531 molecular_function] (1)                                                   | NB-ARC [IPR002182] (1); Ulp1 protease family, C-terminal catalytic domain [IPR003653] (1); P-loop containing nucleoside triphosphate hydrolase [IPR027417] (1)                                                                                                                                                                                                                                                        | scaffold_3_mRNA_3298.1           | -                           | -                               |
| GF0028388 | 1                             | 0                        | 0                            | MuDR family transposase isoform 1 (1)                           | zinc ion binding [GO:0008270 molecular_function] (1)                                                                                                                                                                     | Zinc finger, SWIM-type [IPR007527] (1); Zinc finger, PMZ-type [IPR006564] (1); MULE transposase domain [IPR018289] (1)                                                                                                                                                                                                                                                                                                | scaffold_3_mRNA_3290.1           | -                           | -                               |
| GF0028387 | 1                             | 0                        | 0                            | Hypothetical protein (1)                                        |                                                                                                                                                                                                                          |                                                                                                                                                                                                                                                                                                                                                                                                                       | scaffold_3_mRNA_3287.1           | -                           | -                               |
| GF0028386 | 1                             | 0                        | 0                            | Hypothetical protein (1)                                        |                                                                                                                                                                                                                          | Retrotransposon gag domain [IPR016522] (1); Aspartic peptidase domain [IPR021109] (1)                                                                                                                                                                                                                                                                                                                                 | scaffold_3_mRNA_3286.1           | -                           | -                               |
| GF0028385 | 1                             | 0                        | 0                            | Hypothetical protein (1)                                        | ATP binding [GO:000524 molecular_function] (1); protein kinase activity [GO:0004672 molecular_function] (1); protein phosphorylation [GO:0006468 biological_process] (1)                                                 | Serine-threonine/tyrosine-protein kinase, catalytic domain [IPR001245] (1); Protein kinase domain [IPR000719] (1); Protein kinase-like domain [IPR011009] (1)                                                                                                                                                                                                                                                         | scaffold_3_mRNA_3281.1           | -                           | -                               |
| GF0028384 | 1                             | 0                        | 0                            | Hypothetical protein (1)                                        |                                                                                                                                                                                                                          |                                                                                                                                                                                                                                                                                                                                                                                                                       | scaffold_3_mRNA_3278.1           | -                           | -                               |
| GF0028383 | 1                             | 0                        | 0                            | Hypothetical protein (1)                                        |                                                                                                                                                                                                                          |                                                                                                                                                                                                                                                                                                                                                                                                                       | scaffold_3_mRNA_3277.1           | -                           | -                               |
| GF0028382 | 1                             | 0                        | 0                            | Hypothetical protein (1)                                        |                                                                                                                                                                                                                          |                                                                                                                                                                                                                                                                                                                                                                                                                       | scaffold_3_mRNA_3275.1           | -                           | -                               |
| GF0028381 | 1                             | 0                        | 0                            | Hypothetical protein (1)                                        |                                                                                                                                                                                                                          |                                                                                                                                                                                                                                                                                                                                                                                                                       | scaffold_3_mRNA_3274.1           | -                           | -                               |
| GF0028380 | 1                             | 0                        | 0                            | Hypothetical protein (1)                                        |                                                                                                                                                                                                                          |                                                                                                                                                                                                                                                                                                                                                                                                                       | scaffold_3_mRNA_3272.1           | -                           | -                               |
| GF0028379 | 1                             | 0                        | 0                            | Hypothetical protein (1)                                        | zinc ion binding [GO:0008270 molecular_function] (1); nucleic acid binding [GO:0003676 molecular_function] (1)                                                                                                           | Zinc finger, CCHC-type [IPR001878] (1); Retroviral aspartyl protease [IPR013242] (1); Aspartic peptidase domain [IPR021109] (1)                                                                                                                                                                                                                                                                                       | scaffold_3_mRNA_3271.1           | -                           | -                               |
| GF0028378 | 1                             | 0                        | 0                            | Embryonic abundant protein-like (1)                             | metabolic process [GO:0008152 biological_process] (1); methyltransferase activity [GO:0008168 molecular_function] (1)                                                                                                    | S-adenosyl-L-methionine-dependent methyltransferase [IPR029063] (1); Methyltransferase type 11 [IPR013216] (1)                                                                                                                                                                                                                                                                                                        | scaffold_3_mRNA_3270.1           | -                           | -                               |
| GF0028377 | 1                             | 0                        | 0                            | Retrovirus-related Pol polyprotein from transposon TNT 1-94 (1) | zinc ion binding [GO:0008270 molecular_function] (1); nucleic acid binding [GO:0003676 molecular_function] (1)                                                                                                           | Zinc finger, CCHC-type [IPR001878] (1)                                                                                                                                                                                                                                                                                                                                                                                | scaffold_3_mRNA_3264.1           | -                           | -                               |
| GF0028376 | 1                             | 0                        | 0                            | Hypothetical protein (1)                                        |                                                                                                                                                                                                                          |                                                                                                                                                                                                                                                                                                                                                                                                                       | scaffold_3_mRNA_3259.1           | -                           | -                               |
| GF0028375 | 1                             | 0                        | 0                            | Hypothetical protein (1)                                        |                                                                                                                                                                                                                          | Transposon, En/Spm-like [IPR004242] (1)                                                                                                                                                                                                                                                                                                                                                                               | scaffold_3_mRNA_3256.1           | -                           | -                               |
| GF0028374 | 1                             | 0                        | 0                            | Hypothetical protein (1)                                        |                                                                                                                                                                                                                          | Domain of unknown function DUF4371 [IPR025398] (1)                                                                                                                                                                                                                                                                                                                                                                    | scaffold_3_mRNA_3252.1           | -                           | -                               |
| GF0028373 | 1                             | 0                        | 0                            | Hypothetical protein (1)                                        |                                                                                                                                                                                                                          |                                                                                                                                                                                                                                                                                                                                                                                                                       | scaffold_3_mRNA_3232.1           | -                           | -                               |
| GF0028372 | 1                             | 0                        | 0                            | Hypothetical protein (1)                                        |                                                                                                                                                                                                                          | Domain of unknown function DUF4219 [IPR025314] (1)                                                                                                                                                                                                                                                                                                                                                                    | scaffold_3_mRNA_3231.1           | -                           | -                               |
| GF0028371 | 1                             | 0                        | 0                            | Hypothetical protein (1)                                        | zinc ion binding [GO:0008270 molecular_function] (1)                                                                                                                                                                     | Zinc finger, GRF-type [IPR010666] (1)                                                                                                                                                                                                                                                                                                                                                                                 | scaffold_3_mRNA_3228.1           | -                           | -                               |
| GF0028370 | 1                             | 0                        | 0                            | Transposon protein, putative, Mutator sub-class (1)             | zinc ion binding [GO:0008270 molecular_function] (1)                                                                                                                                                                     | Transposase, MuDR, plant [IPR004332] (1); Domain of unknown function DUF4219 [IPR025314] (1); Zinc finger, PMZ-type [IPR006564] (1); MULE transposase domain [IPR018289] (1); Zinc finger, SWIM-type [IPR007527] (1)                                                                                                                                                                                                  | scaffold_3_mRNA_3227.1           | -                           | -                               |
| GF0028369 | 1                             | 0                        | 0                            | Hypothetical protein (1)                                        |                                                                                                                                                                                                                          |                                                                                                                                                                                                                                                                                                                                                                                                                       | scaffold_3_mRNA_3226.1           | -                           | -                               |
| GF0028368 | 1                             | 0                        | 0                            | Hypothetical protein (1)                                        |                                                                                                                                                                                                                          |                                                                                                                                                                                                                                                                                                                                                                                                                       | scaffold_3_mRNA_3224.1           | -                           | -                               |
| GF0028367 | 1                             | 0                        | 0                            | Hypothetical protein (1)                                        |                                                                                                                                                                                                                          |                                                                                                                                                                                                                                                                                                                                                                                                                       | scaffold_3_mRNA_3221.1           | -                           | -                               |
| GF0028366 | 1                             | 0                        | 0                            | Hypothetical protein (1)                                        |                                                                                                                                                                                                                          |                                                                                                                                                                                                                                                                                                                                                                                                                       | scaffold_3_mRNA_3218.1           | -                           | -                               |

| ID        | Num. in <i>C. celermariae</i> | Num. in <i>C. uarchia</i> | Num. in <i>P. trifoliata</i> | Note                                                           | GO                                                                                                                                                                                   | InterPro                                                                                                                                                                                                                                                                                                                                                                                                                                           | Members in <i>C. celermariae</i> | Members in <i>C. uarchia</i> | Members in <i>P. trifoliata</i> |
|-----------|-------------------------------|---------------------------|------------------------------|----------------------------------------------------------------|--------------------------------------------------------------------------------------------------------------------------------------------------------------------------------------|----------------------------------------------------------------------------------------------------------------------------------------------------------------------------------------------------------------------------------------------------------------------------------------------------------------------------------------------------------------------------------------------------------------------------------------------------|----------------------------------|------------------------------|---------------------------------|
| GF0028365 | 1                             | 0                         | 0                            | 0 Hypothetical protein (1)                                     |                                                                                                                                                                                      | LOG family [IPRO31100] (1)                                                                                                                                                                                                                                                                                                                                                                                                                         | scaffold_3_mRNA_3217.1           | -                            | -                               |
| GF0028364 | 1                             | 0                         | 0                            | 0 Hypothetical protein (1)                                     |                                                                                                                                                                                      |                                                                                                                                                                                                                                                                                                                                                                                                                                                    | scaffold_3_mRNA_3215.1           | -                            | -                               |
| GF0028363 | 1                             | 0                         | 0                            | 0 Hypothetical protein (1)                                     | regulation of transcription, DNA-templated [GO:0006355]                                                                                                                              | FAR1 DNA binding domain [IPRO0430] (1); FHY3/FAR1 family [IPRO31052] (1)                                                                                                                                                                                                                                                                                                                                                                           | scaffold_3_mRNA_3213.1           | -                            | -                               |
| GF0028362 | 1                             | 0                         | 0                            | 0 Hypothetical protein (1)                                     |                                                                                                                                                                                      |                                                                                                                                                                                                                                                                                                                                                                                                                                                    | scaffold_3_mRNA_3210.1           | -                            | -                               |
| GF0028361 | 1                             | 0                         | 0                            | 0 Cytokinin riboside 5'-monophosphate phosphoribohydrolase (1) |                                                                                                                                                                                      |                                                                                                                                                                                                                                                                                                                                                                                                                                                    | scaffold_3_mRNA_3209.1           | -                            | -                               |
| GF0028360 | 1                             | 0                         | 0                            | 0 Hypothetical protein (1)                                     |                                                                                                                                                                                      |                                                                                                                                                                                                                                                                                                                                                                                                                                                    | scaffold_3_mRNA_3204.1           | -                            | -                               |
| GF0028359 | 1                             | 0                         | 0                            | 0 Hypothetical protein (1)                                     |                                                                                                                                                                                      |                                                                                                                                                                                                                                                                                                                                                                                                                                                    | scaffold_3_mRNA_3203.1           | -                            | -                               |
| GF0028358 | 1                             | 0                         | 0                            | 0 Hypothetical protein (1)                                     |                                                                                                                                                                                      | Pectin lyase fold/virulence factor [IPRO11050] (1); Pectin lyase fold [IPRO12334] (1)                                                                                                                                                                                                                                                                                                                                                              | scaffold_3_mRNA_3199.1           | -                            | -                               |
| GF0028357 | 1                             | 0                         | 0                            | 0 Hypothetical protein (1)                                     | polygalacturonase activity [GO:0004650] molecular_function (1); carbohydrate metabolic process [GO:0005975] biological_process (1)                                                   | Pectin lyase fold [IPRO12334] (1); Pectin lyase fold/virulence factor [IPRO11050] (1); Glycoside hydrolase, family 28 [IPRO00743] (1); Parallel beta-helix repeat [IPRO06626] (1)                                                                                                                                                                                                                                                                  | scaffold_3_mRNA_3195.1           | -                            | -                               |
| GF0028356 | 1                             | 0                         | 0                            | 0 Hypothetical protein (1)                                     |                                                                                                                                                                                      |                                                                                                                                                                                                                                                                                                                                                                                                                                                    | scaffold_3_mRNA_3194.1           | -                            | -                               |
| GF0028355 | 1                             | 0                         | 0                            | 0 Hypothetical protein (1)                                     |                                                                                                                                                                                      | Viral movement protein [IPRO28919] (1)                                                                                                                                                                                                                                                                                                                                                                                                             | scaffold_3_mRNA_3190.1           | -                            | -                               |
| GF0028354 | 1                             | 0                         | 0                            | 0 Polygalacturonase (1)                                        | carbohydrate metabolic process [GO:0005975] biological_process (1); polygalacturonase activity [GO:0004650] molecular_function (1)                                                   | Pectin lyase fold/virulence factor [IPRO11050] (1); Pectin lyase fold [IPRO12334] (1); Parallel beta-helix repeat [IPRO06626] (1); Glycoside hydrolase, family 28 [IPRO00743] (1)                                                                                                                                                                                                                                                                  | scaffold_3_mRNA_3188.1           | -                            | -                               |
| GF0028353 | 1                             | 0                         | 0                            | 0 Monosaccharide transport protein (1)                         |                                                                                                                                                                                      |                                                                                                                                                                                                                                                                                                                                                                                                                                                    | scaffold_3_mRNA_3187.1           | -                            | -                               |
| GF0028352 | 1                             | 0                         | 0                            | 0 Hypothetical protein (1)                                     |                                                                                                                                                                                      |                                                                                                                                                                                                                                                                                                                                                                                                                                                    | scaffold_3_mRNA_3186.1           | -                            | -                               |
| GF0028351 | 1                             | 0                         | 0                            | 0 Hypothetical protein (1)                                     | catalytic activity [GO:0003824] molecular_function (1); omega peptidase activity [GO:0008042] molecular_function (1); ghtamine metabolic process [GO:0006541] biological_process (1) | Peptidase C26, gamma-glutamyl hydrolase [IPRO15527] (1)                                                                                                                                                                                                                                                                                                                                                                                            | scaffold_3_mRNA_3184.1           | -                            | -                               |
| GF0028350 | 1                             | 0                         | 0                            | 0 Polygalacturonase (1)                                        | polygalacturonase activity [GO:0004650] molecular_function (1); carbohydrate metabolic process [GO:0005975] biological_process (1)                                                   | Pectin lyase fold [IPRO12334] (1); Pectin lyase fold/virulence factor [IPRO11050] (1); Glycoside hydrolase, family 28 [IPRO00743] (1); Parallel beta-helix repeat [IPRO06626] (1)                                                                                                                                                                                                                                                                  | scaffold_3_mRNA_3182.1           | -                            | -                               |
| GF0028349 | 1                             | 0                         | 0                            | 0 Hypothetical protein (1)                                     |                                                                                                                                                                                      |                                                                                                                                                                                                                                                                                                                                                                                                                                                    | scaffold_3_mRNA_3180.1           | -                            | -                               |
| GF0028348 | 1                             | 0                         | 0                            | 0 Monosaccharide transport protein (1)                         |                                                                                                                                                                                      |                                                                                                                                                                                                                                                                                                                                                                                                                                                    | scaffold_3_mRNA_3179.1           | -                            | -                               |
| GF0028347 | 1                             | 0                         | 0                            | 0 Retrotransposon protein, putative, Ty3-gypsy subclass (1)    |                                                                                                                                                                                      | Aspartic peptidase domain [IPRO21109] (1)                                                                                                                                                                                                                                                                                                                                                                                                          | scaffold_3_mRNA_3178.1           | -                            | -                               |
| GF0028346 | 1                             | 0                         | 0                            | 0 Hypothetical protein (1)                                     |                                                                                                                                                                                      |                                                                                                                                                                                                                                                                                                                                                                                                                                                    | scaffold_3_mRNA_3176.1           | -                            | -                               |
| GF0028345 | 1                             | 0                         | 0                            | 0 Polygalacturonase (1)                                        | carbohydrate metabolic process [GO:0005975] biological_process (1); polygalacturonase activity [GO:0004650] molecular_function (1)                                                   | Pectin lyase fold [IPRO12334] (1); Pectin lyase fold/virulence factor [IPRO11050] (1); Parallel beta-helix repeat [IPRO06626] (1); Glycoside hydrolase, family 28 [IPRO00743] (1)                                                                                                                                                                                                                                                                  | scaffold_3_mRNA_3175.1           | -                            | -                               |
| GF0028344 | 1                             | 0                         | 0                            | 0 Putative Leucine Rich Repeat Protein (1)                     |                                                                                                                                                                                      | Leucine-rich repeat domain, L domain-like [IPRO32675] (1)                                                                                                                                                                                                                                                                                                                                                                                          | scaffold_3_mRNA_3173.1           | -                            | -                               |
| GF0028343 | 1                             | 0                         | 0                            | 0 Polygalacturonase (1)                                        | polygalacturonase activity [GO:0004650] molecular_function (1); carbohydrate metabolic process [GO:0005975] biological_process (1)                                                   | Pectin lyase fold/virulence factor [IPRO11050] (1); Pectin lyase fold [IPRO12334] (1); Glycoside hydrolase, family 28 [IPRO00743] (1); Parallel beta-helix repeat [IPRO06626] (1)                                                                                                                                                                                                                                                                  | scaffold_3_mRNA_3172.1           | -                            | -                               |
| GF0028342 | 1                             | 0                         | 0                            | 0 Hypothetical protein (1)                                     |                                                                                                                                                                                      | Leucine-rich repeat domain, L domain-like [IPRO32675] (1)                                                                                                                                                                                                                                                                                                                                                                                          | scaffold_3_mRNA_3171.1           | -                            | -                               |
| GF0028341 | 1                             | 0                         | 0                            | 0 Hypothetical protein (1)                                     |                                                                                                                                                                                      |                                                                                                                                                                                                                                                                                                                                                                                                                                                    | scaffold_3_mRNA_3170.1           | -                            | -                               |
| GF0028340 | 1                             | 0                         | 0                            | 0 Polygalacturonase (1)                                        | carbohydrate metabolic process [GO:0005975] biological_process (1); polygalacturonase activity [GO:0004650] molecular_function (1)                                                   | Pectin lyase fold/virulence factor [IPRO11050] (1); Pectin lyase fold [IPRO12334] (1); Glycoside hydrolase, family 28 [IPRO00743] (1)                                                                                                                                                                                                                                                                                                              | scaffold_3_mRNA_3167.1           | -                            | -                               |
| GF0028339 | 1                             | 0                         | 0                            | 0 Hypothetical protein (1)                                     |                                                                                                                                                                                      | Cytokinin riboside 5'-monophosphate phosphoribohydrolase LOG [IPRO05269] (1); LOG family [IPRO31100] (1)                                                                                                                                                                                                                                                                                                                                           | scaffold_3_mRNA_3166.1           | -                            | -                               |
| GF0028338 | 1                             | 0                         | 0                            | 0 Hypothetical protein (1)                                     |                                                                                                                                                                                      |                                                                                                                                                                                                                                                                                                                                                                                                                                                    | scaffold_3_mRNA_3160.1           | -                            | -                               |
| GF0028337 | 1                             | 0                         | 0                            | 0 Polygalacturonase (1)                                        | carbohydrate metabolic process [GO:0005975] biological_process (1); polygalacturonase activity [GO:0004650] molecular_function (1)                                                   | Pectin lyase fold [IPRO12334] (1); Pectin lyase fold/virulence factor [IPRO11050] (1); Glycoside hydrolase, family 28 [IPRO00743] (1); Parallel beta-helix repeat [IPRO06626] (1)                                                                                                                                                                                                                                                                  | scaffold_3_mRNA_3157.1           | -                            | -                               |
| GF0028336 | 1                             | 0                         | 0                            | 0 Hypothetical protein (1)                                     |                                                                                                                                                                                      |                                                                                                                                                                                                                                                                                                                                                                                                                                                    | scaffold_3_mRNA_3155.1           | -                            | -                               |
| GF0028335 | 1                             | 0                         | 0                            | 0 Hypothetical protein (1)                                     | nucleic acid binding [GO:0003676] molecular_function (1); zinc ion binding [GO:0008270] molecular_function (1)                                                                       | Zinc finger, CCHC-type [IPRO01878] (1)                                                                                                                                                                                                                                                                                                                                                                                                             | scaffold_3_mRNA_3154.1           | -                            | -                               |
| GF0028334 | 1                             | 0                         | 0                            | 0 Hypothetical protein (1)                                     |                                                                                                                                                                                      |                                                                                                                                                                                                                                                                                                                                                                                                                                                    | scaffold_3_mRNA_3153.1           | -                            | -                               |
| GF0028333 | 1                             | 0                         | 0                            | 0 Hypothetical protein (1)                                     |                                                                                                                                                                                      |                                                                                                                                                                                                                                                                                                                                                                                                                                                    | scaffold_3_mRNA_3152.1           | -                            | -                               |
| GF0028332 | 1                             | 0                         | 0                            | 0 Hypothetical protein (1)                                     |                                                                                                                                                                                      |                                                                                                                                                                                                                                                                                                                                                                                                                                                    | scaffold_3_mRNA_3151.1           | -                            | -                               |
| GF0028331 | 1                             | 0                         | 0                            | 0 Hypothetical protein (1)                                     |                                                                                                                                                                                      |                                                                                                                                                                                                                                                                                                                                                                                                                                                    | scaffold_3_mRNA_3150.1           | -                            | -                               |
| GF0028330 | 1                             | 0                         | 0                            | 0 Hypothetical protein (1)                                     |                                                                                                                                                                                      |                                                                                                                                                                                                                                                                                                                                                                                                                                                    | scaffold_3_mRNA_3148.1           | -                            | -                               |
| GF0028329 | 1                             | 0                         | 0                            | 0 Hypothetical protein (1)                                     |                                                                                                                                                                                      |                                                                                                                                                                                                                                                                                                                                                                                                                                                    | scaffold_3_mRNA_3143.1           | -                            | -                               |
| GF0028328 | 1                             | 0                         | 0                            | 0 Hypothetical protein (1)                                     | nucleic acid binding [GO:0003676] molecular_function (1); RNA-DNA hybrid ribonuclease activity [GO:0004523] molecular_function (1)                                                   | Ribonuclease H-like domain [IPRO12337] (1); Ribonuclease H domain [IPRO02156] (1)                                                                                                                                                                                                                                                                                                                                                                  | scaffold_3_mRNA_3140.1           | -                            | -                               |
| GF0028327 | 1                             | 0                         | 0                            | 0 KINASE 2B family protein (1)                                 | protein kinase activity [GO:0004672] molecular_function (1); protein phosphorylation [GO:0006468] biological_process (1); ATP binding [GO:0005524] molecular_function (1)            | Protein kinase domain [IPRO00719] (1); Protein kinase-like domain [IPRO11009] (1); Calcineurin-like phosphoesterase domain, InpH type [IPRO24664] (1); Protein kinase, ATP binding site [IPRO17441] (1); Serine/threonine-protein kinase, active site [IPRO08271] (1); Serine/threonine/tyrosine-protein kinase, catalytic domain [IPRO01245] (1); Phosphodiesterase M0936/Vp29 [IPRO0079] (1); Metallo-dependent phosphatase-like [IPRO29052] (1) | scaffold_3_mRNA_3133.1           | -                            | -                               |
| GF0028326 | 1                             | 0                         | 0                            | 0 Hypothetical protein (1)                                     |                                                                                                                                                                                      |                                                                                                                                                                                                                                                                                                                                                                                                                                                    | scaffold_3_mRNA_3126.1           | -                            | -                               |
| GF0028325 | 1                             | 0                         | 0                            | 0 Hypothetical protein (1)                                     |                                                                                                                                                                                      |                                                                                                                                                                                                                                                                                                                                                                                                                                                    | scaffold_3_mRNA_3123.1           | -                            | -                               |
| GF0028324 | 1                             | 0                         | 0                            | 0 Hypothetical protein (1)                                     |                                                                                                                                                                                      |                                                                                                                                                                                                                                                                                                                                                                                                                                                    | scaffold_3_mRNA_3122.1           | -                            | -                               |
| GF0028323 | 1                             | 0                         | 0                            | 0 Hypothetical protein (1)                                     |                                                                                                                                                                                      |                                                                                                                                                                                                                                                                                                                                                                                                                                                    | scaffold_3_mRNA_3119.1           | -                            | -                               |
| GF0028322 | 1                             | 0                         | 0                            | 0 Hypothetical protein (1)                                     |                                                                                                                                                                                      |                                                                                                                                                                                                                                                                                                                                                                                                                                                    | scaffold_3_mRNA_3117.1           | -                            | -                               |
| GF0028321 | 1                             | 0                         | 0                            | 0 Monosaccharide transport protein (1)                         |                                                                                                                                                                                      |                                                                                                                                                                                                                                                                                                                                                                                                                                                    | scaffold_3_mRNA_3116.1           | -                            | -                               |
| GF0028320 | 1                             | 0                         | 0                            | 0 ABC transporter G family member 33 (1)                       | riboflavin synthase complex [GO:0009549] cellular_component (1); riboflavin biosynthetic process [GO:0009231] biological_process (1)                                                 | 6,7-dimethyl-8-ribityllumazine synthase [IPRO02180] (1)                                                                                                                                                                                                                                                                                                                                                                                            | scaffold_3_mRNA_3108.1           | -                            | -                               |
| GF0028319 | 1                             | 0                         | 0                            | 0 Disease resistance N-like protein (1)                        | ADP binding [GO:0043531] molecular_function (1)                                                                                                                                      | Leucine-rich repeat domain, L domain-like [IPRO32675] (1); Winged helix-turn-helix DNA-binding domain [IPRO11991] (1); NB-ARC [IPRO02182] (1); P-loop containing nucleoside triphosphate hydrolase [IPRO27417] (1)                                                                                                                                                                                                                                 | scaffold_3_mRNA_3102.1           | -                            | -                               |
| GF0028318 | 1                             | 0                         | 0                            | 0 Hypothetical protein (1)                                     |                                                                                                                                                                                      |                                                                                                                                                                                                                                                                                                                                                                                                                                                    | scaffold_3_mRNA_3098.1           | -                            | -                               |
| GF0028317 | 1                             | 0                         | 0                            | 0 Disease resistance N-like protein (1)                        | ADP binding [GO:0043531] molecular_function (1)                                                                                                                                      | Winged helix-turn-helix DNA-binding domain [IPRO11991] (1); Leucine-rich repeat domain, L domain-like [IPRO32675] (1); Receptor-L-domain [IPRO00494] (1); NB-ARC [IPRO02182] (1); P-loop containing nucleoside triphosphate hydrolase [IPRO27417] (1)                                                                                                                                                                                              | scaffold_3_mRNA_3092.1           | -                            | -                               |
| GF0028316 | 1                             | 0                         | 0                            | 0 Hypothetical protein (1)                                     |                                                                                                                                                                                      |                                                                                                                                                                                                                                                                                                                                                                                                                                                    | scaffold_3_mRNA_3091.1           | -                            | -                               |
| GF0028315 | 1                             | 0                         | 0                            | 0 Hypothetical protein (1)                                     |                                                                                                                                                                                      | Transposon, En/Spm-like [IPRO04242] (1)                                                                                                                                                                                                                                                                                                                                                                                                            | scaffold_3_mRNA_3090.1           | -                            | -                               |
| GF0028314 | 1                             | 0                         | 0                            | 0 Hypothetical protein (1)                                     |                                                                                                                                                                                      | Domain of unknown function DUF4218 [IPRO25452] (1)                                                                                                                                                                                                                                                                                                                                                                                                 | scaffold_3_mRNA_3083.1           | -                            | -                               |
| GF0028313 | 1                             | 0                         | 0                            | 0 Hypothetical protein (1)                                     |                                                                                                                                                                                      |                                                                                                                                                                                                                                                                                                                                                                                                                                                    | scaffold_3_mRNA_3079.1           | -                            | -                               |
| GF0028312 | 1                             | 0                         | 0                            | 0 Hypothetical protein (1)                                     |                                                                                                                                                                                      |                                                                                                                                                                                                                                                                                                                                                                                                                                                    | scaffold_3_mRNA_3077.1           | -                            | -                               |
| GF0028311 | 1                             | 0                         | 0                            | 0 Hypothetical protein (1)                                     | regulation of transcription, DNA-templated [GO:0006355] biological_process (1)                                                                                                       | MULE transposase domain [IPRO18289] (1); FHY3/FAR1 family [IPRO31052] (1); FAR1 DNA binding domain [IPRO04330] (1)                                                                                                                                                                                                                                                                                                                                 | scaffold_3_mRNA_3076.1           | -                            | -                               |
| GF0028310 | 1                             | 0                         | 0                            | 0 Hypothetical protein (1)                                     |                                                                                                                                                                                      |                                                                                                                                                                                                                                                                                                                                                                                                                                                    | scaffold_3_mRNA_3072.1           | -                            | -                               |
| GF0028309 | 1                             | 0                         | 0                            | 0 Putative retrotransposable elements (1)                      |                                                                                                                                                                                      |                                                                                                                                                                                                                                                                                                                                                                                                                                                    | scaffold_3_mRNA_3071.1           | -                            | -                               |
| GF0028308 | 1                             | 0                         | 0                            | 0 Cytokinin riboside 5'-monophosphate phosphoribohydrolase (1) |                                                                                                                                                                                      | LOG family [IPRO31100] (1); Cytokinin riboside 5'-monophosphate phosphoribohydrolase LOG [IPRO05269] (1)                                                                                                                                                                                                                                                                                                                                           | scaffold_3_mRNA_3070.1           | -                            | -                               |
| GF0028307 | 1                             | 0                         | 0                            | 0 Hypothetical protein (1)                                     |                                                                                                                                                                                      |                                                                                                                                                                                                                                                                                                                                                                                                                                                    | scaffold_3_mRNA_3069.1           | -                            | -                               |
| GF0028306 | 1                             | 0                         | 0                            | 0 Hypothetical protein (1)                                     |                                                                                                                                                                                      | Retrotransposon gag domain [IPRO05162] (1)                                                                                                                                                                                                                                                                                                                                                                                                         | scaffold_3_mRNA_3058.1           | -                            | -                               |
| GF0028305 | 1                             | 0                         | 0                            | 0 Hypothetical protein (1)                                     |                                                                                                                                                                                      |                                                                                                                                                                                                                                                                                                                                                                                                                                                    | scaffold_3_mRNA_3057.1           | -                            | -                               |

| ID        | Num. in <i>C. clementiae</i> | Num. in <i>C. uchiha</i> | Num. in <i>P. trifoliata</i> | Note                                                      | GO                                                                                                                                                                                                                                                                            | InterPro                                                                                                                                                                                                                                                                                                                                                                | Members in <i>C. clementiae</i> | Members in <i>C. uchiha</i> | Members in <i>P. trifoliata</i> |
|-----------|------------------------------|--------------------------|------------------------------|-----------------------------------------------------------|-------------------------------------------------------------------------------------------------------------------------------------------------------------------------------------------------------------------------------------------------------------------------------|-------------------------------------------------------------------------------------------------------------------------------------------------------------------------------------------------------------------------------------------------------------------------------------------------------------------------------------------------------------------------|---------------------------------|-----------------------------|---------------------------------|
| GF0028304 | 1                            | 0                        | 0                            | 0 Hypothetical protein (1)                                |                                                                                                                                                                                                                                                                               |                                                                                                                                                                                                                                                                                                                                                                         | scaffold_3_mRNA_3054.1          | -                           | -                               |
| GF0028303 | 1                            | 0                        | 0                            | 0 Hypothetical protein (1)                                |                                                                                                                                                                                                                                                                               |                                                                                                                                                                                                                                                                                                                                                                         | scaffold_3_mRNA_3052.1          | -                           | -                               |
| GF0028302 | 1                            | 0                        | 0                            | 0 Hypothetical protein (1)                                |                                                                                                                                                                                                                                                                               | Leucine-rich repeat domain, L domain-like [IPR032675] (1)                                                                                                                                                                                                                                                                                                               | scaffold_3_mRNA_3050.1          | -                           | -                               |
| GF0028301 | 1                            | 0                        | 0                            | 0 Hypothetical protein (1)                                | nucleic acid binding [GO:0003676 molecular_function] (1); zinc ion binding [GO:0008270 molecular_function] (1)                                                                                                                                                                | Domain of unknown function DUF4283 [IPR025588] (1); Zinc knuckle CXC2X4HX4C [IPR025836] (1); Zinc finger, CCHC-type [IPR001878] (1)                                                                                                                                                                                                                                     | scaffold_3_mRNA_3042.1          | -                           | -                               |
| GF0028300 | 1                            | 0                        | 0                            | 0 RNA-directed DNA polymerase (Reverse transcriptase) (1) |                                                                                                                                                                                                                                                                               | Reverse transcriptase domain [IPR000477] (1)                                                                                                                                                                                                                                                                                                                            | scaffold_3_mRNA_3040.1          | -                           | -                               |
| GF0028299 | 1                            | 0                        | 0                            | 0 Hypothetical protein (1)                                |                                                                                                                                                                                                                                                                               | Ankyrin repeat-containing domain [IPR020683] (1)                                                                                                                                                                                                                                                                                                                        | scaffold_3_mRNA_3027.1          | -                           | -                               |
| GF0028298 | 1                            | 0                        | 0                            | 0 Hypothetical protein (1)                                |                                                                                                                                                                                                                                                                               |                                                                                                                                                                                                                                                                                                                                                                         | scaffold_3_mRNA_3024.1          | -                           | -                               |
| GF0028297 | 1                            | 0                        | 0                            | 0 Hypothetical protein (1)                                |                                                                                                                                                                                                                                                                               |                                                                                                                                                                                                                                                                                                                                                                         | scaffold_3_mRNA_3023.1          | -                           | -                               |
| GF0028296 | 1                            | 0                        | 0                            | 0 Hydrolase, alpha/beta domain protein (1)                |                                                                                                                                                                                                                                                                               | Alpha/Beta hydrolase fold [IPR029058] (1); Alpha/beta hydrolase fold-1 [IPR000073] (1)                                                                                                                                                                                                                                                                                  | scaffold_3_mRNA_3016.1          | -                           | -                               |
| GF0028295 | 1                            | 0                        | 0                            | 0 Hypothetical protein (1)                                | proteolysis [GO:0006508 biological_process] (1); cysteine-type peptidase activity [GO:0008234 molecular_function] (1)                                                                                                                                                         | Upl1 protease family, C-terminal catalytic domain [IPR003653] (1)                                                                                                                                                                                                                                                                                                       | scaffold_3_mRNA_3009.1          | -                           | -                               |
| GF0028294 | 1                            | 0                        | 0                            | 0 Hypothetical protein (1)                                |                                                                                                                                                                                                                                                                               |                                                                                                                                                                                                                                                                                                                                                                         | scaffold_3_mRNA_3004.1          | -                           | -                               |
| GF0028293 | 1                            | 0                        | 0                            | 0 Hypothetical protein (1)                                |                                                                                                                                                                                                                                                                               |                                                                                                                                                                                                                                                                                                                                                                         | scaffold_3_mRNA_3003.1          | -                           | -                               |
| GF0028292 | 1                            | 0                        | 0                            | 0 Hypothetical protein (1)                                |                                                                                                                                                                                                                                                                               |                                                                                                                                                                                                                                                                                                                                                                         | scaffold_3_mRNA_3000.1          | -                           | -                               |
| GF0028291 | 1                            | 0                        | 0                            | 0 Hypothetical protein (1)                                |                                                                                                                                                                                                                                                                               | Leucine-rich repeat domain, L domain-like [IPR032675] (1)                                                                                                                                                                                                                                                                                                               | scaffold_3_mRNA_2995.1          | -                           | -                               |
| GF0028290 | 1                            | 0                        | 0                            | 0 Hypothetical protein (1)                                |                                                                                                                                                                                                                                                                               |                                                                                                                                                                                                                                                                                                                                                                         | scaffold_3_mRNA_2993.1          | -                           | -                               |
| GF0028289 | 1                            | 0                        | 0                            | 0 Aluminum-activated malate transporter 4 (1)             | malate transport [GO:0015743 biological_process] (1)                                                                                                                                                                                                                          | Aluminum-activated malate transporter [IPR020966] (1)                                                                                                                                                                                                                                                                                                                   | scaffold_3_mRNA_2992.1          | -                           | -                               |
| GF0028288 | 1                            | 0                        | 0                            | 0 Hypothetical protein (1)                                |                                                                                                                                                                                                                                                                               |                                                                                                                                                                                                                                                                                                                                                                         | scaffold_3_mRNA_2990.1          | -                           | -                               |
| GF0028287 | 1                            | 0                        | 0                            | 0 Hypothetical protein (1)                                |                                                                                                                                                                                                                                                                               | Arabidopsis retrotransposon Orf1 [IPR004312] (1)                                                                                                                                                                                                                                                                                                                        | scaffold_3_mRNA_2987.1          | -                           | -                               |
| GF0028286 | 1                            | 0                        | 0                            | 0 Disease resistance protein (TIR-NBS-LRR class) (1)      | ADP binding [GO:0043531 molecular_function] (1)                                                                                                                                                                                                                               | P-loop containing nucleoside triphosphate hydrolase [IPR027417] (1); NB-ARC [IPR002182] (1); Leucine-rich repeat 3 [IPR011713] (1); Leucine-rich repeat domain, L domain-like [IPR032675] (1); Winged helix-turn-helix DNA-binding domain [IPR011991] (1)                                                                                                               | scaffold_3_mRNA_2984.1          | -                           | -                               |
| GF0028285 | 1                            | 0                        | 0                            | 0 Hypothetical protein (1)                                | nucleic acid binding [GO:0003676 molecular_function] (1); zinc ion binding [GO:0008270 molecular_function] (1)                                                                                                                                                                | Zinc finger, CCHC-type [IPR001878] (1)                                                                                                                                                                                                                                                                                                                                  | scaffold_3_mRNA_2982.1          | -                           | -                               |
| GF0028284 | 1                            | 0                        | 0                            | 0 Hypothetical protein (1)                                |                                                                                                                                                                                                                                                                               | Alpha/Beta hydrolase fold [IPR029058] (1)                                                                                                                                                                                                                                                                                                                               | scaffold_3_mRNA_2975.1          | -                           | -                               |
| GF0028283 | 1                            | 0                        | 0                            | 0 Disease resistance protein (TIR-NBS-LRR class) (1)      | signal transduction [GO:0007165 biological_process] (1); ADP binding [GO:0043531 molecular_function] (1); zinc ion binding [GO:0008270 molecular_function] (1); protein binding [GO:0005515 molecular_function] (1); nucleic acid binding [GO:0003676 molecular_function] (1) | P-loop containing nucleoside triphosphate hydrolase [IPR027417] (1); NB-ARC [IPR002182] (1); GAG-pre-integrase domain [IPR025724] (1); Zinc finger, CCHC-type [IPR001878] (1); Toll/interleukin-1 receptor homology (TIR) domain [IPR000157] (1); Winged helix-turn-helix DNA-binding domain [IPR011991] (1); Leucine-rich repeat domain, L domain-like [IPR032675] (1) | scaffold_3_mRNA_2973.1          | -                           | -                               |
| GF0028282 | 1                            | 0                        | 0                            | 0 Hypothetical protein (1)                                |                                                                                                                                                                                                                                                                               |                                                                                                                                                                                                                                                                                                                                                                         | scaffold_3_mRNA_2972.1          | -                           | -                               |
| GF0028281 | 1                            | 0                        | 0                            | 0 Disease resistance protein (TIR-NBS-LRR class) (1)      | ADP binding [GO:0043531 molecular_function] (1); signal transduction [GO:0007165 biological_process] (1); protein binding [GO:0005515 molecular_function] (1)                                                                                                                 | NB-ARC [IPR002182] (1); P-loop containing nucleoside triphosphate hydrolase [IPR027417] (1); Winged helix-turn-helix DNA-binding domain [IPR011991] (1); Leucine-rich repeat domain, L domain-like [IPR032675] (1); Toll/interleukin-1 receptor homology (TIR) domain [IPR000157] (1)                                                                                   | scaffold_3_mRNA_2964.1          | -                           | -                               |
| GF0028280 | 1                            | 0                        | 0                            | 0 Disease resistance protein (TIR-NBS-LRR class) (1)      | protein binding [GO:0005515 molecular_function] (1); signal transduction [GO:0007165 biological_process] (1); ADP binding [GO:0043531 molecular_function] (1)                                                                                                                 | NB-ARC [IPR002182] (1); P-loop containing nucleoside triphosphate hydrolase [IPR027417] (1); Leucine-rich repeat domain, L domain-like [IPR032675] (1); Winged helix-turn-helix DNA-binding domain [IPR011991] (1); Toll/interleukin-1 receptor homology (TIR) domain [IPR000157] (1)                                                                                   | scaffold_3_mRNA_2963.1          | -                           | -                               |
| GF0028279 | 1                            | 0                        | 0                            | 0 Hypothetical protein (1)                                |                                                                                                                                                                                                                                                                               |                                                                                                                                                                                                                                                                                                                                                                         | scaffold_3_mRNA_2961.1          | -                           | -                               |
| GF0028278 | 1                            | 0                        | 0                            | 0 Disease resistance protein (TIR-NBS-LRR class) (1)      | protein binding [GO:0005515 molecular_function] (1); signal transduction [GO:0007165 biological_process] (1); ADP binding [GO:0043531 molecular_function] (1)                                                                                                                 | P-loop containing nucleoside triphosphate hydrolase [IPR027417] (1); NB-ARC [IPR002182] (1); Toll/interleukin-1 receptor homology (TIR) domain [IPR000157] (1)                                                                                                                                                                                                          | scaffold_3_mRNA_2960.1          | -                           | -                               |
| GF0028277 | 1                            | 0                        | 0                            | 0 Hypothetical protein (1)                                | translational termination [GO:0006415 biological_process] (1)                                                                                                                                                                                                                 | Peptide chain release factor class I class II [IPR000352] (1)                                                                                                                                                                                                                                                                                                           | scaffold_3_mRNA_2958.1          | -                           | -                               |
| GF0028276 | 1                            | 0                        | 0                            | 0 Hypothetical protein (1)                                | protein binding [GO:0005515 molecular_function] (1); signal transduction [GO:0007165 biological_process] (1)                                                                                                                                                                  | Toll/interleukin-1 receptor homology (TIR) domain [IPR000157] (1)                                                                                                                                                                                                                                                                                                       | scaffold_3_mRNA_2957.1          | -                           | -                               |
| GF0028275 | 1                            | 0                        | 0                            | 0 Hypothetical protein (1)                                |                                                                                                                                                                                                                                                                               | Alpha/Beta hydrolase fold [IPR029058] (1)                                                                                                                                                                                                                                                                                                                               | scaffold_3_mRNA_2956.1          | -                           | -                               |
| GF0028274 | 1                            | 0                        | 0                            | 0 Hypothetical protein (1)                                |                                                                                                                                                                                                                                                                               |                                                                                                                                                                                                                                                                                                                                                                         | scaffold_3_mRNA_2953.1          | -                           | -                               |
| GF0028273 | 1                            | 0                        | 0                            | 0 Hypothetical protein (1)                                |                                                                                                                                                                                                                                                                               |                                                                                                                                                                                                                                                                                                                                                                         | scaffold_3_mRNA_2952.1          | -                           | -                               |
| GF0028272 | 1                            | 0                        | 0                            | 0 Peptide chain release factor 1 (1)                      | translational termination [GO:0006415 biological_process] (1); translation release factor activity [GO:0003747 molecular_function] (1)                                                                                                                                        | Peptide chain release factor class I class II [IPR000352] (1)                                                                                                                                                                                                                                                                                                           | scaffold_3_mRNA_2950.1          | -                           | -                               |
| GF0028271 | 1                            | 0                        | 0                            | 0 Putative hydrolase yugF (1)                             |                                                                                                                                                                                                                                                                               | Alpha/Beta hydrolase fold [IPR029058] (1)                                                                                                                                                                                                                                                                                                                               | scaffold_3_mRNA_2949.1          | -                           | -                               |
| GF0028270 | 1                            | 0                        | 0                            | 0 Hypothetical protein (1)                                | protein binding [GO:0005515 molecular_function] (1); signal transduction [GO:0007165 biological_process] (1); ADP binding [GO:0043531 molecular_function] (1)                                                                                                                 | Winged helix-turn-helix DNA-binding domain [IPR011991] (1); Toll/interleukin-1 receptor homology (TIR) domain [IPR000157] (1); NB-ARC [IPR002182] (1); Arabidopsis retrotransposon Orf1 [IPR004312] (1); P-loop containing nucleoside triphosphate hydrolase [IPR027417] (1)                                                                                            | scaffold_3_mRNA_2947.1          | -                           | -                               |
| GF0028269 | 1                            | 0                        | 0                            | 0 Hypothetical protein (1)                                | translation release factor activity [GO:0003747 molecular_function] (1); translational termination [GO:0006415 biological_process] (1)                                                                                                                                        | Peptide chain release factor class I class II [IPR000352] (1)                                                                                                                                                                                                                                                                                                           | scaffold_3_mRNA_2946.1          | -                           | -                               |
| GF0028268 | 1                            | 0                        | 0                            | 0 Hypothetical protein (1)                                |                                                                                                                                                                                                                                                                               | Leucine-rich repeat domain, L domain-like [IPR032675] (1); Leucine rich repeat 4 [IPR025875] (1)                                                                                                                                                                                                                                                                        | scaffold_3_mRNA_2943.1          | -                           | -                               |
| GF0028267 | 1                            | 0                        | 0                            | 0 Hypothetical protein (1)                                |                                                                                                                                                                                                                                                                               |                                                                                                                                                                                                                                                                                                                                                                         | scaffold_3_mRNA_2942.1          | -                           | -                               |
| GF0028266 | 1                            | 0                        | 0                            | 0 Hypothetical protein (1)                                | RNA-DNA hybrid ribonuclease activity [GO:0004523 molecular_function] (1); nucleic acid binding [GO:0003676 molecular_function] (1)                                                                                                                                            | Ribonuclease H domain [IPR002156] (1); Domain of unknown function DUF4283 [IPR025588] (1); Ribonuclease H-like domain [IPR012337] (1)                                                                                                                                                                                                                                   | scaffold_3_mRNA_2940.1          | -                           | -                               |
| GF0028265 | 1                            | 0                        | 0                            | 0 Hypothetical protein (1)                                | signal transduction [GO:0007165 biological_process] (1); protein binding [GO:0005515 molecular_function] (1)                                                                                                                                                                  | Toll/interleukin-1 receptor homology (TIR) domain [IPR000157] (1)                                                                                                                                                                                                                                                                                                       | scaffold_3_mRNA_2936.1          | -                           | -                               |
| GF0028264 | 1                            | 0                        | 0                            | 0 Hypothetical protein (1)                                |                                                                                                                                                                                                                                                                               |                                                                                                                                                                                                                                                                                                                                                                         | scaffold_3_mRNA_2935.1          | -                           | -                               |
| GF0028263 | 1                            | 0                        | 0                            | 0 Hypothetical protein (1)                                |                                                                                                                                                                                                                                                                               | Retrotransposon gag domain [IPR005162] (1)                                                                                                                                                                                                                                                                                                                              | scaffold_3_mRNA_2931.1          | -                           | -                               |
| GF0028262 | 1                            | 0                        | 0                            | 0 R 4 protein (1)                                         | protein binding [GO:0005515 molecular_function] (1); ADP binding [GO:0043531 molecular_function] (1); signal transduction [GO:0007165 biological_process] (1)                                                                                                                 | NB-ARC [IPR002182] (1); P-loop containing nucleoside triphosphate hydrolase [IPR027417] (1); Leucine-rich repeat domain, L domain-like [IPR032675] (1); Toll/interleukin-1 receptor homology (TIR) domain [IPR000157] (1)                                                                                                                                               | scaffold_3_mRNA_2929.1          | -                           | -                               |
| GF0028261 | 1                            | 0                        | 0                            | 0 Hypothetical protein (1)                                |                                                                                                                                                                                                                                                                               | Repeat of unknown function XGLTT [IPR008164] (1)                                                                                                                                                                                                                                                                                                                        | scaffold_3_mRNA_2925.1          | -                           | -                               |
| GF0028260 | 1                            | 0                        | 0                            | 0 Hypothetical protein (1)                                | ADP binding [GO:0043531 molecular_function] (1)                                                                                                                                                                                                                               | P-loop containing nucleoside triphosphate hydrolase [IPR027417] (1); NB-ARC [IPR002182] (1)                                                                                                                                                                                                                                                                             | scaffold_3_mRNA_2924.1          | -                           | -                               |
| GF0028259 | 1                            | 0                        | 0                            | 0 Hypothetical protein (1)                                | nucleic acid binding [GO:0003676 molecular_function] (1)                                                                                                                                                                                                                      | Ribonuclease H-like domain [IPR012337] (1)                                                                                                                                                                                                                                                                                                                              | scaffold_3_mRNA_2917.1          | -                           | -                               |
| GF0028258 | 1                            | 0                        | 0                            | 0 Disease resistance protein (TIR-NBS-LRR class) (1)      | protein binding [GO:0005515 molecular_function] (1); ADP binding [GO:0043531 molecular_function] (1); signal transduction [GO:0007165 biological_process] (1)                                                                                                                 | Leucine-rich repeat domain, L domain-like [IPR032675] (1); Winged helix-turn-helix DNA-binding domain [IPR011991] (1); Toll/interleukin-1 receptor homology (TIR) domain [IPR000157] (1); NB-ARC [IPR002182] (1); P-loop containing nucleoside triphosphate hydrolase [IPR027417] (1)                                                                                   | scaffold_3_mRNA_2912.1          | -                           | -                               |
| GF0028257 | 1                            | 0                        | 0                            | 0 Hypothetical protein (1)                                |                                                                                                                                                                                                                                                                               |                                                                                                                                                                                                                                                                                                                                                                         | scaffold_3_mRNA_2907.1          | -                           | -                               |
| GF0028256 | 1                            | 0                        | 0                            | 0 Hypothetical protein (1)                                |                                                                                                                                                                                                                                                                               |                                                                                                                                                                                                                                                                                                                                                                         | scaffold_3_mRNA_2906.1          | -                           | -                               |

| ID        | Num. in <i>C. caryophyllata</i> | Num. in <i>C. uchiha</i> | Num. in <i>P. trifoliata</i> | Note                                                           | GO                                                                                                                                                                                                                                                                                                                 | InterPro                                                                                                                                                                                                                                                                                                                                                                                                                                                                        | Members in <i>C. caryophyllata</i> | Members in <i>C. uchiha</i> | Members in <i>P. trifoliata</i> |
|-----------|---------------------------------|--------------------------|------------------------------|----------------------------------------------------------------|--------------------------------------------------------------------------------------------------------------------------------------------------------------------------------------------------------------------------------------------------------------------------------------------------------------------|---------------------------------------------------------------------------------------------------------------------------------------------------------------------------------------------------------------------------------------------------------------------------------------------------------------------------------------------------------------------------------------------------------------------------------------------------------------------------------|------------------------------------|-----------------------------|---------------------------------|
| GF0028255 | 1                               | 0                        | 0                            | 0 Hypothetical protein (1)                                     | metal ion transport [GO:0030001 biological_process] (1); metal ion binding [GO:0046872 molecular_function] (1); integral component of membrane [GO:0016021 cellular_component] (1)                                                                                                                                 | Heavy-metal-associated, conserved site [IPR017989] (1); Heavy metal-associated domain, HMA [IPR006021] (1); HAD-like domain [IPR023214] (1); P-type ATPase [IPR001757] (1); P-type ATPase, transmembrane domain [IPR03298] (1)                                                                                                                                                                                                                                                  | scaffold_3_mRNA_290.1              | -                           | -                               |
| GF0028254 | 1                               | 0                        | 0                            | 0 Hypothetical protein (1)                                     |                                                                                                                                                                                                                                                                                                                    |                                                                                                                                                                                                                                                                                                                                                                                                                                                                                 | scaffold_3_mRNA_2896.1             | -                           | -                               |
| GF0028253 | 1                               | 0                        | 0                            | 0 Hypothetical protein (1)                                     | nucleic acid binding [GO:0003676 molecular_function] (1)                                                                                                                                                                                                                                                           | Ribonuclease H-like domain [IPR012337] (1)                                                                                                                                                                                                                                                                                                                                                                                                                                      | scaffold_3_mRNA_2895.1             | -                           | -                               |
| GF0028252 | 1                               | 0                        | 0                            | 0 Disease resistance protein (TIR-NBS-LRR class) (1)           | signal transduction [GO:0007165 biological_process] (1); ADP binding [GO:0043531 molecular_function] (1); protein binding [GO:0005515 molecular_function] (1)                                                                                                                                                      | P-loop containing nucleoside triphosphate hydrolase [IPR027417] (1); NB-ARC [IPR002182] (1); Toll interleukin-1 receptor homology (TIR) domain [IPR00157] (1); Winged helix-turn-helix DNA-binding domain [IPR011991] (1); Leucine-rich repeat domain, L domain-like [IPR032675] (1)                                                                                                                                                                                            | scaffold_3_mRNA_2894.1             | -                           | -                               |
| GF0028251 | 1                               | 0                        | 0                            | 0 Hypothetical protein (1)                                     | translation release factor activity [GO:0003747 molecular_function] (1); translational termination [GO:0006415 biological_process] (1)                                                                                                                                                                             | Peptide chain release factor class I class II [IPR000352] (1)                                                                                                                                                                                                                                                                                                                                                                                                                   | scaffold_3_mRNA_2893.1             | -                           | -                               |
| GF0028250 | 1                               | 0                        | 0                            | 0 Disease resistance protein (TIR-NBS-LRR class) (1)           | ADP binding [GO:0043531 molecular_function] (1); signal transduction [GO:0007165 biological_process] (1); protein binding [GO:0005515 molecular_function] (1)                                                                                                                                                      | P-loop containing nucleoside triphosphate hydrolase [IPR027417] (1); NB-ARC [IPR002182] (1); Toll interleukin-1 receptor homology (TIR) domain [IPR00157] (1); Leucine-rich repeat domain, L domain-like [IPR032675] (1); Winged helix-turn-helix DNA-binding domain [IPR011991] (1)                                                                                                                                                                                            | scaffold_3_mRNA_2892.1             | -                           | -                               |
| GF0028249 | 1                               | 0                        | 0                            | 0 Protein phosphatase 2A regulatory subunit A (1)              | protein complex assembly [GO:0006466 biological_process] (1); binding [GO:0005488 molecular_function] (1); protein phosphatase regulator activity [GO:0019888 molecular_function] (1)                                                                                                                              | Armadiillo-type fold [IPR016024] (1); Serine/threonine-protein phosphatase 2A subunit A, metazoan [IPR031090] (1); HEAT, type 2 [IPR021133] (1); Armadiillo-like helical [IPR019899] (1); NB-ARC [IPR002182] (1); P-loop containing nucleoside triphosphate hydrolase [IPR027417] (1); Winged helix-turn-helix DNA-binding domain [IPR011991] (1); Leucine-rich repeat domain, L domain-like [IPR032675] (1); Toll interleukin-1 receptor homology (TIR) domain [IPR000157] (1) | scaffold_3_mRNA_2891.1             | -                           | -                               |
| GF0028248 | 1                               | 0                        | 0                            | 0 Disease resistance protein (TIR-NBS-LRR class) (1)           | protein binding [GO:0005515 molecular_function] (1); ADP binding [GO:0043531 molecular_function] (1); signal transduction [GO:0007165 biological_process] (1)                                                                                                                                                      | Winged helix-turn-helix DNA-binding domain [IPR011991] (1); Leucine-rich repeat domain, L domain-like [IPR032675] (1); Toll interleukin-1 receptor homology (TIR) domain [IPR000157] (1)                                                                                                                                                                                                                                                                                        | scaffold_3_mRNA_2887.1             | -                           | -                               |
| GF0028247 | 1                               | 0                        | 0                            | 0 Cytokinin riboside 5'-monophosphate phosphoribohydrolase (1) |                                                                                                                                                                                                                                                                                                                    | LOG family [IPR031100] (1)                                                                                                                                                                                                                                                                                                                                                                                                                                                      | scaffold_3_mRNA_2871.1             | -                           | -                               |
| GF0028246 | 1                               | 0                        | 0                            | 0 Hypothetical protein (1)                                     |                                                                                                                                                                                                                                                                                                                    |                                                                                                                                                                                                                                                                                                                                                                                                                                                                                 | scaffold_3_mRNA_2870.1             | -                           | -                               |
| GF0028245 | 1                               | 0                        | 0                            | 0 Hypothetical protein (1)                                     |                                                                                                                                                                                                                                                                                                                    |                                                                                                                                                                                                                                                                                                                                                                                                                                                                                 | scaffold_3_mRNA_2868.1             | -                           | -                               |
| GF0028244 | 1                               | 0                        | 0                            | 0 Hypothetical protein (1)                                     |                                                                                                                                                                                                                                                                                                                    | LOG family [IPR031100] (1)                                                                                                                                                                                                                                                                                                                                                                                                                                                      | scaffold_3_mRNA_2867.1             | -                           | -                               |
| GF0028243 | 1                               | 0                        | 0                            | 0 Hypothetical protein (1)                                     | oxidoreductase activity, acting on paired donors, with incorporation or reduction of molecular oxygen [GO:0016705 molecular_function] (1); oxidation-reduction process [GO:0055114 biological_process] (1); heme binding [GO:0020037 molecular_function] (1); iron ion binding [GO:0005506 molecular_function] (1) | Cytochrome P450, E-class, group I [IPR002401] (1); Cytochrome P450 [IPR001128] (1)                                                                                                                                                                                                                                                                                                                                                                                              | scaffold_3_mRNA_2866.1             | -                           | -                               |
| GF0028242 | 1                               | 0                        | 0                            | 0 Hypothetical protein (1)                                     | signal transduction [GO:0007165 biological_process] (1); ADP binding [GO:0043531 molecular_function] (1); protein binding [GO:0005515 molecular_function] (1); nucleic acid binding [GO:0003676 molecular_function] (1)                                                                                            | Winged helix-turn-helix DNA-binding domain [IPR011991] (1); Leucine-rich repeat domain, L domain-like [IPR032675] (1); Reverse transcriptase zinc-binding domain [IPR026960] (1); Ribonuclease H-like domain [IPR012337] (1); Toll interleukin-1 receptor homology (TIR) domain [IPR00157] (1); NB-ARC [IPR002182] (1); P-loop containing nucleoside triphosphate hydrolase [IPR027417] (1)                                                                                     | scaffold_3_mRNA_2865.1             | -                           | -                               |
| GF0028241 | 1                               | 0                        | 0                            | 0 Flavone synthase II (1)                                      | oxidoreductase activity, acting on paired donors, with incorporation or reduction of molecular oxygen [GO:0016705 molecular_function] (1); oxidation-reduction process [GO:0055114 biological_process] (1); iron ion binding [GO:0005506 molecular_function] (1); heme binding [GO:0020037 molecular_function] (1) | Cytochrome P450 [IPR001128] (1); Cytochrome P450, conserved site [IPR017972] (1); Cytochrome P450, E-class, group I [IPR002401] (1)                                                                                                                                                                                                                                                                                                                                             | scaffold_3_mRNA_2864.1             | -                           | -                               |
| GF0028240 | 1                               | 0                        | 0                            | 0 TMV resistance protein N (1)                                 | ADP binding [GO:0043531 molecular_function] (1); signal transduction [GO:0007165 biological_process] (1); protein binding [GO:0005515 molecular_function] (1)                                                                                                                                                      | P-loop containing nucleoside triphosphate hydrolase [IPR027417] (1); NB-ARC [IPR002182] (1); Leucine-rich repeat [IPR001611] (1); Toll interleukin-1 receptor homology (TIR) domain [IPR000157] (1); Leucine-rich repeat, typical subtype [IPR003591] (1); Leucine-rich repeat domain, L domain-like [IPR032675] (1)                                                                                                                                                            | scaffold_3_mRNA_2858.1             | -                           | -                               |
| GF0028239 | 1                               | 0                        | 0                            | 0 Disease resistance protein (TIR-NBS-LRR class) (1)           | protein binding [GO:0005515 molecular_function] (1); ADP binding [GO:0043531 molecular_function] (1); signal transduction [GO:0007165 biological_process] (1)                                                                                                                                                      | Toll interleukin-1 receptor homology (TIR) domain [IPR000157] (1); NB-ARC [IPR002182] (1); P-loop containing nucleoside triphosphate hydrolase [IPR027417] (1)                                                                                                                                                                                                                                                                                                                  | scaffold_3_mRNA_2857.1             | -                           | -                               |
| GF0028238 | 1                               | 0                        | 0                            | 0 Hypothetical protein (1)                                     |                                                                                                                                                                                                                                                                                                                    |                                                                                                                                                                                                                                                                                                                                                                                                                                                                                 | scaffold_3_mRNA_2852.1             | -                           | -                               |
| GF0028237 | 1                               | 0                        | 0                            | 0 Hypothetical protein (1)                                     |                                                                                                                                                                                                                                                                                                                    |                                                                                                                                                                                                                                                                                                                                                                                                                                                                                 | scaffold_3_mRNA_2851.1             | -                           | -                               |
| GF0028236 | 1                               | 0                        | 0                            | 0 Hypothetical protein (1)                                     | structural constituent of ribosome [GO:0007335 molecular_function] (1); intracellular [GO:0005622 cellular_component] (1); translation [GO:0006412 biological_process] (1); ribosome [GO:0005840 cellular_component] (1)                                                                                           | Ribosomal protein L13e [IPR001380] (1); Ribosomal protein L13, eukaryotic [IPR03245] (1); Ribosomal protein L13e, conserved site [IPR018256] (1)                                                                                                                                                                                                                                                                                                                                | scaffold_3_mRNA_2850.1             | -                           | -                               |
| GF0028235 | 1                               | 0                        | 0                            | 0 Hypothetical protein (1)                                     |                                                                                                                                                                                                                                                                                                                    | DNA methylase, C-5 cytosine-specific, active site [IPR018117] (1)                                                                                                                                                                                                                                                                                                                                                                                                               | scaffold_3_mRNA_2843.1             | -                           | -                               |
| GF0028234 | 1                               | 0                        | 0                            | 0 Hypothetical protein (1)                                     |                                                                                                                                                                                                                                                                                                                    |                                                                                                                                                                                                                                                                                                                                                                                                                                                                                 | scaffold_3_mRNA_2836.1             | -                           | -                               |
| GF0028233 | 1                               | 0                        | 0                            | 0 Hypothetical protein (1)                                     |                                                                                                                                                                                                                                                                                                                    |                                                                                                                                                                                                                                                                                                                                                                                                                                                                                 | scaffold_3_mRNA_2835.1             | -                           | -                               |
| GF0028232 | 1                               | 0                        | 0                            | 0 Hypothetical protein (1)                                     | nucleic acid binding [GO:0003676 molecular_function] (1); protein glycosylation [GO:0006486 biological_process] (1); galactosyltransferase activity [GO:0008378 molecular_function] (1); membrane [GO:0016020 cellular_component] (1)                                                                              | Glycosyl transferase, family 31 [IPR002659] (1); Ribonuclease H-like domain [IPR012337] (1)                                                                                                                                                                                                                                                                                                                                                                                     | scaffold_3_mRNA_2830.1             | -                           | -                               |
| GF0028231 | 1                               | 0                        | 0                            | 0 N-acetylglucosaminidase 3-alpha-galactosyltransferase (1)    | protein glycosylation [GO:0006486 biological_process] (1); membrane [GO:0016020 cellular_component] (1); galactosyltransferase activity [GO:0008378 molecular_function] (1)                                                                                                                                        | Glycosyl transferase, family 31 [IPR002659] (1)                                                                                                                                                                                                                                                                                                                                                                                                                                 | scaffold_3_mRNA_2829.1             | -                           | -                               |
| GF0028230 | 1                               | 0                        | 0                            | 0 Protein ALGI (1)                                             | GTP binding [GO:0005525 molecular_function] (1)                                                                                                                                                                                                                                                                    | ALGI-type guanine nucleotide-binding (G) domain [IPR006703] (1); P-loop containing nucleoside triphosphate hydrolase [IPR027417] (1)                                                                                                                                                                                                                                                                                                                                            | scaffold_3_mRNA_2819.1             | -                           | -                               |
| GF0028229 | 1                               | 0                        | 0                            | 0 Hypothetical protein (1)                                     |                                                                                                                                                                                                                                                                                                                    |                                                                                                                                                                                                                                                                                                                                                                                                                                                                                 | scaffold_3_mRNA_2817.1             | -                           | -                               |
| GF0028228 | 1                               | 0                        | 0                            | 0 Hypothetical protein (1)                                     |                                                                                                                                                                                                                                                                                                                    |                                                                                                                                                                                                                                                                                                                                                                                                                                                                                 | scaffold_3_mRNA_2815.1             | -                           | -                               |
| GF0028227 | 1                               | 0                        | 0                            | 0 Protein ALGI (1)                                             | GTP binding [GO:0005525 molecular_function] (1)                                                                                                                                                                                                                                                                    | ALGI-type guanine nucleotide-binding (G) domain [IPR006703] (1); P-loop containing nucleoside triphosphate hydrolase [IPR027417] (1)                                                                                                                                                                                                                                                                                                                                            | scaffold_3_mRNA_2813.1             | -                           | -                               |
| GF0028226 | 1                               | 0                        | 0                            | 0 Hypothetical protein (1)                                     |                                                                                                                                                                                                                                                                                                                    |                                                                                                                                                                                                                                                                                                                                                                                                                                                                                 | scaffold_3_mRNA_2800.1             | -                           | -                               |
| GF0028225 | 1                               | 0                        | 0                            | 0 Hypothetical protein (1)                                     | nucleic acid binding [GO:0003676 molecular_function] (1)                                                                                                                                                                                                                                                           | Ribonuclease H-like domain [IPR012337] (1)                                                                                                                                                                                                                                                                                                                                                                                                                                      | scaffold_3_mRNA_2799.1             | -                           | -                               |
| GF0028224 | 1                               | 0                        | 0                            | 0 Hypothetical protein (1)                                     |                                                                                                                                                                                                                                                                                                                    | Reverse transcriptase, RNA-dependent DNA polymerase [IPR013103] (1)                                                                                                                                                                                                                                                                                                                                                                                                             | scaffold_3_mRNA_2798.1             | -                           | -                               |
| GF0028223 | 1                               | 0                        | 0                            | 0 Hypothetical protein (1)                                     |                                                                                                                                                                                                                                                                                                                    |                                                                                                                                                                                                                                                                                                                                                                                                                                                                                 | scaffold_3_mRNA_2791.1             | -                           | -                               |
| GF0028222 | 1                               | 0                        | 0                            | 0 Hypothetical protein (1)                                     |                                                                                                                                                                                                                                                                                                                    |                                                                                                                                                                                                                                                                                                                                                                                                                                                                                 | scaffold_3_mRNA_2790.1             | -                           | -                               |
| GF0028221 | 1                               | 0                        | 0                            | 0 Putative non-LTR retroelement reverse transcriptase (1)      | nucleic acid binding [GO:0003676 molecular_function] (1); reverse transcription [GO:0006122 biological_process] (1); hydrolase activity [GO:0016787 molecular_function] (1)                                                                                                                                        | Ribonuclease H-like domain [IPR012337] (1)                                                                                                                                                                                                                                                                                                                                                                                                                                      | scaffold_3_mRNA_2783.1             | -                           | -                               |
| GF0028220 | 1                               | 0                        | 0                            | 0 Gibberellin receptor GID1C (1)                               |                                                                                                                                                                                                                                                                                                                    | Alpha/beta hydrolase fold-3 [IPR013094] (1); Alpha/Beta hydrolase fold [IPR029058] (1)                                                                                                                                                                                                                                                                                                                                                                                          | scaffold_3_mRNA_2782.1             | -                           | -                               |
| GF0028219 | 1                               | 0                        | 0                            | 0 Hypothetical protein (1)                                     |                                                                                                                                                                                                                                                                                                                    |                                                                                                                                                                                                                                                                                                                                                                                                                                                                                 | scaffold_3_mRNA_2764.1             | -                           | -                               |
| GF0028218 | 1                               | 0                        | 0                            | 0 Hypothetical protein (1)                                     |                                                                                                                                                                                                                                                                                                                    |                                                                                                                                                                                                                                                                                                                                                                                                                                                                                 | scaffold_3_mRNA_2763.1             | -                           | -                               |
| GF0028217 | 1                               | 0                        | 0                            | 0 Hypothetical protein (1)                                     |                                                                                                                                                                                                                                                                                                                    |                                                                                                                                                                                                                                                                                                                                                                                                                                                                                 | scaffold_3_mRNA_2762.1             | -                           | -                               |
| GF0028216 | 1                               | 0                        | 0                            | 0 Hypothetical protein (1)                                     |                                                                                                                                                                                                                                                                                                                    |                                                                                                                                                                                                                                                                                                                                                                                                                                                                                 | scaffold_3_mRNA_2760.1             | -                           | -                               |
| GF0028215 | 1                               | 0                        | 0                            | 0 Cytokinin riboside 5'-monophosphate phosphoribohydrolase (1) |                                                                                                                                                                                                                                                                                                                    |                                                                                                                                                                                                                                                                                                                                                                                                                                                                                 | scaffold_3_mRNA_2752.1             | -                           | -                               |
| GF0028214 | 1                               | 0                        | 0                            | 0 Cytokinin riboside 5'-monophosphate phosphoribohydrolase (1) |                                                                                                                                                                                                                                                                                                                    | LOG family [IPR031100] (1)                                                                                                                                                                                                                                                                                                                                                                                                                                                      | scaffold_3_mRNA_2744.1             | -                           | -                               |
| GF0028213 | 1                               | 0                        | 0                            | 0 Hypothetical protein (1)                                     |                                                                                                                                                                                                                                                                                                                    |                                                                                                                                                                                                                                                                                                                                                                                                                                                                                 | scaffold_3_mRNA_2743.1             | -                           | -                               |

| ID        | Num. in <i>C. caryophyllata</i> | Num. in <i>C. uchiha</i> | Num. in <i>P. trifoliata</i> | Note                                                             | GO                                                                                                                                                                                                                                                                                                                                                                                                                                                                                                                                                                                                                                                 | InterPro                                                                                                                                                                                                                                                                                                                                                                                                                                                                                                                                                                                                                                                                                       | Members in <i>C. caryophyllata</i> | Members in <i>C. uchiha</i> | Members in <i>P. trifoliata</i> |
|-----------|---------------------------------|--------------------------|------------------------------|------------------------------------------------------------------|----------------------------------------------------------------------------------------------------------------------------------------------------------------------------------------------------------------------------------------------------------------------------------------------------------------------------------------------------------------------------------------------------------------------------------------------------------------------------------------------------------------------------------------------------------------------------------------------------------------------------------------------------|------------------------------------------------------------------------------------------------------------------------------------------------------------------------------------------------------------------------------------------------------------------------------------------------------------------------------------------------------------------------------------------------------------------------------------------------------------------------------------------------------------------------------------------------------------------------------------------------------------------------------------------------------------------------------------------------|------------------------------------|-----------------------------|---------------------------------|
| GF0028212 | 1                               | 0                        | 0                            | 0 Hypothetical protein (1)                                       |                                                                                                                                                                                                                                                                                                                                                                                                                                                                                                                                                                                                                                                    |                                                                                                                                                                                                                                                                                                                                                                                                                                                                                                                                                                                                                                                                                                | scaffold_3_mRNA_2742.1             | -                           | -                               |
| GF0028211 | 1                               | 0                        | 0                            | 0 Hypothetical protein (1)                                       |                                                                                                                                                                                                                                                                                                                                                                                                                                                                                                                                                                                                                                                    |                                                                                                                                                                                                                                                                                                                                                                                                                                                                                                                                                                                                                                                                                                | scaffold_3_mRNA_2741.1             | -                           | -                               |
| GF0028210 | 1                               | 0                        | 0                            | 0 Retrotransposon protein, putative, Ty1-copia subclass (1)      |                                                                                                                                                                                                                                                                                                                                                                                                                                                                                                                                                                                                                                                    |                                                                                                                                                                                                                                                                                                                                                                                                                                                                                                                                                                                                                                                                                                | scaffold_3_mRNA_2739.1             | -                           | -                               |
| GF0028209 | 1                               | 0                        | 0                            | 0 Disease resistance protein (TIR-NBS-LRR class) (1)             | protein binding [GO:0005515 molecular_function] (1); signal transduction [GO:0007165 biological_process] (1); ADP binding [GO:0043531 molecular_function] (1)                                                                                                                                                                                                                                                                                                                                                                                                                                                                                      | P-loop containing nucleoside triphosphate hydrolase [IPR027417] (1); NB-ARC [IPR02182] (1); Toll interleukin-1 receptor homology (TIR) domain [IPR00157] (1); Leucine-rich repeat domain, L domain-like [IPR032675] (1); Winged helix-turn-helix DNA-binding domain [IPR011991] (1)                                                                                                                                                                                                                                                                                                                                                                                                            | scaffold_3_mRNA_2736.1             | -                           | -                               |
| GF0028208 | 1                               | 0                        | 0                            | 0 Hypothetical protein (1)                                       |                                                                                                                                                                                                                                                                                                                                                                                                                                                                                                                                                                                                                                                    |                                                                                                                                                                                                                                                                                                                                                                                                                                                                                                                                                                                                                                                                                                | scaffold_3_mRNA_2734.1             | -                           | -                               |
| GF0028207 | 1                               | 0                        | 0                            | 0 Putative non-LTR retroelement reverse transcriptase (1)        | nucleic acid binding [GO:0003676 molecular_function] (1)                                                                                                                                                                                                                                                                                                                                                                                                                                                                                                                                                                                           | Reverse transcriptase domain [IPR000477] (1); Reverse transcriptase zinc-binding domain [IPR026960] (1); Ribonuclease H-like domain [IPR012337] (1)                                                                                                                                                                                                                                                                                                                                                                                                                                                                                                                                            | scaffold_3_mRNA_2732.1             | -                           | -                               |
| GF0028206 | 1                               | 0                        | 0                            | 0 Hypothetical protein (1)                                       |                                                                                                                                                                                                                                                                                                                                                                                                                                                                                                                                                                                                                                                    |                                                                                                                                                                                                                                                                                                                                                                                                                                                                                                                                                                                                                                                                                                | scaffold_3_mRNA_2731.1             | -                           | -                               |
| GF0028205 | 1                               | 0                        | 0                            | 0 Hypothetical protein (1)                                       |                                                                                                                                                                                                                                                                                                                                                                                                                                                                                                                                                                                                                                                    |                                                                                                                                                                                                                                                                                                                                                                                                                                                                                                                                                                                                                                                                                                | scaffold_3_mRNA_2724.1             | -                           | -                               |
| GF0028204 | 1                               | 0                        | 0                            | 0 Hypothetical protein (1)                                       |                                                                                                                                                                                                                                                                                                                                                                                                                                                                                                                                                                                                                                                    |                                                                                                                                                                                                                                                                                                                                                                                                                                                                                                                                                                                                                                                                                                | scaffold_3_mRNA_2706.1             | -                           | -                               |
| GF0028203 | 1                               | 0                        | 0                            | 0 Hypothetical protein (1)                                       |                                                                                                                                                                                                                                                                                                                                                                                                                                                                                                                                                                                                                                                    |                                                                                                                                                                                                                                                                                                                                                                                                                                                                                                                                                                                                                                                                                                | scaffold_3_mRNA_2699.1             | -                           | -                               |
| GF0028202 | 1                               | 0                        | 0                            | 0 Hypothetical protein (1)                                       |                                                                                                                                                                                                                                                                                                                                                                                                                                                                                                                                                                                                                                                    |                                                                                                                                                                                                                                                                                                                                                                                                                                                                                                                                                                                                                                                                                                | scaffold_3_mRNA_2698.1             | -                           | -                               |
| GF0028201 | 1                               | 0                        | 0                            | 0 Hypothetical protein (1)                                       |                                                                                                                                                                                                                                                                                                                                                                                                                                                                                                                                                                                                                                                    |                                                                                                                                                                                                                                                                                                                                                                                                                                                                                                                                                                                                                                                                                                | scaffold_3_mRNA_2696.1             | -                           | -                               |
| GF0028200 | 1                               | 0                        | 0                            | 0 Hypothetical protein (1)                                       |                                                                                                                                                                                                                                                                                                                                                                                                                                                                                                                                                                                                                                                    |                                                                                                                                                                                                                                                                                                                                                                                                                                                                                                                                                                                                                                                                                                | scaffold_3_mRNA_2692.1             | -                           | -                               |
| GF0028199 | 1                               | 0                        | 0                            | 0 TMV resistance N (1)                                           |                                                                                                                                                                                                                                                                                                                                                                                                                                                                                                                                                                                                                                                    |                                                                                                                                                                                                                                                                                                                                                                                                                                                                                                                                                                                                                                                                                                | scaffold_3_mRNA_2684.1             | -                           | -                               |
| GF0028198 | 1                               | 0                        | 0                            | 0 Hypothetical protein (1)                                       |                                                                                                                                                                                                                                                                                                                                                                                                                                                                                                                                                                                                                                                    |                                                                                                                                                                                                                                                                                                                                                                                                                                                                                                                                                                                                                                                                                                | scaffold_3_mRNA_2682.1             | -                           | -                               |
| GF0028197 | 1                               | 0                        | 0                            | 0 Hypothetical protein (1)                                       |                                                                                                                                                                                                                                                                                                                                                                                                                                                                                                                                                                                                                                                    |                                                                                                                                                                                                                                                                                                                                                                                                                                                                                                                                                                                                                                                                                                | scaffold_3_mRNA_2681.1             | -                           | -                               |
| GF0028196 | 1                               | 0                        | 0                            | 0 Hypothetical protein (1)                                       |                                                                                                                                                                                                                                                                                                                                                                                                                                                                                                                                                                                                                                                    |                                                                                                                                                                                                                                                                                                                                                                                                                                                                                                                                                                                                                                                                                                | scaffold_3_mRNA_2678.1             | -                           | -                               |
| GF0028195 | 1                               | 0                        | 0                            | 0 Chalcone reductase (1)                                         | enzymatic activity [GO:0003824 molecular_function] (1); oxidoreductase activity [GO:0016491 molecular_function] (1); oxidation-reduction process [GO:0055114 biological_process] (1); omega peptidase activity [GO:0008242 molecular_function] (1); glutamine metabolic process [GO:0006541 biological_process] (1)                                                                                                                                                                                                                                                                                                                                | NADP-dependent oxidoreductase domain [IPR023210] (1); Peptidase C26, gamma-glutamyl/hydrolase [IPR01527] (1); Aldol/keto reductase, conserved site [IPR018170] (1); Class I glutamine amidotransferase-like [IPR02062] (1); Aldol/keto reductase [IPR020471] (1)                                                                                                                                                                                                                                                                                                                                                                                                                               | scaffold_3_mRNA_2667.1             | -                           | -                               |
| GF0028194 | 1                               | 0                        | 0                            | 0 Hypothetical protein (1)                                       |                                                                                                                                                                                                                                                                                                                                                                                                                                                                                                                                                                                                                                                    |                                                                                                                                                                                                                                                                                                                                                                                                                                                                                                                                                                                                                                                                                                | scaffold_3_mRNA_2662.1             | -                           | -                               |
| GF0028193 | 1                               | 0                        | 0                            | 0 Hypothetical protein (1)                                       | ATP binding [GO:0005524 molecular_function] (1); protein phosphorylation [GO:0006468 biological_process] (1); protein kinase activity [GO:0004672 molecular_function] (1)                                                                                                                                                                                                                                                                                                                                                                                                                                                                          | Protein kinase, ATP binding site [IPR017441] (1); Protein kinase-like domain [IPR011009] (1); Leucine-rich repeat domain, L domain-like [IPR032675] (1); Protein kinase domain [IPR000719] (1)                                                                                                                                                                                                                                                                                                                                                                                                                                                                                                 | scaffold_3_mRNA_2659.1             | -                           | -                               |
| GF0028192 | 1                               | 0                        | 0                            | 0 Hypothetical protein (1)                                       | nucleic acid binding [GO:0003676 molecular_function] (1); regulation of transcription, DNA-templated [GO:0006355 biological_process] (1)                                                                                                                                                                                                                                                                                                                                                                                                                                                                                                           | Carboxy terminal nucleic acid-binding protein [IPR025468] (1)                                                                                                                                                                                                                                                                                                                                                                                                                                                                                                                                                                                                                                  | scaffold_3_mRNA_2658.1             | -                           | -                               |
| GF0028191 | 1                               | 0                        | 0                            | 0 Hypothetical protein (1)                                       |                                                                                                                                                                                                                                                                                                                                                                                                                                                                                                                                                                                                                                                    |                                                                                                                                                                                                                                                                                                                                                                                                                                                                                                                                                                                                                                                                                                | scaffold_3_mRNA_2656.1             | -                           | -                               |
| GF0028190 | 1                               | 0                        | 0                            | 0 Ankyrin repeat family protein, putative (1)                    | regulation of salicylic acid mediated signaling pathway [GO:2000031 biological_process] (1); regulation of defense response [GO:0031347 biological_process] (1); protein binding [GO:0005515 molecular_function] (1); integral component of membrane [GO:0016021 cellular_component] (1); cellular response to salicylic acid stimulus [GO:0071446 biological_process] (1)                                                                                                                                                                                                                                                                         | Ankyrin repeat-containing domain [IPR020683] (1); PGG domain [IPR020961] (1); Protein accelerated cell death 6 [IPR032846] (1); Ankyrin repeat [IPR002110] (1)                                                                                                                                                                                                                                                                                                                                                                                                                                                                                                                                 | scaffold_3_mRNA_2655.1             | -                           | -                               |
| GF0028189 | 1                               | 0                        | 0                            | 0 Retrotransposon protein, putative, Ty1-copia subclass (1)      |                                                                                                                                                                                                                                                                                                                                                                                                                                                                                                                                                                                                                                                    |                                                                                                                                                                                                                                                                                                                                                                                                                                                                                                                                                                                                                                                                                                | scaffold_3_mRNA_2650.1             | -                           | -                               |
| GF0028188 | 1                               | 0                        | 0                            | 0 Hypothetical protein (1)                                       |                                                                                                                                                                                                                                                                                                                                                                                                                                                                                                                                                                                                                                                    |                                                                                                                                                                                                                                                                                                                                                                                                                                                                                                                                                                                                                                                                                                | scaffold_3_mRNA_265.1              | -                           | -                               |
| GF0028187 | 1                               | 0                        | 0                            | 0 Hypothetical protein (1)                                       |                                                                                                                                                                                                                                                                                                                                                                                                                                                                                                                                                                                                                                                    |                                                                                                                                                                                                                                                                                                                                                                                                                                                                                                                                                                                                                                                                                                | scaffold_3_mRNA_2640.1             | -                           | -                               |
| GF0028186 | 1                               | 0                        | 0                            | 0 Hypothetical protein (1)                                       | ADP binding [GO:0043531 molecular_function] (1)                                                                                                                                                                                                                                                                                                                                                                                                                                                                                                                                                                                                    | NB-ARC [IPR02182] (1); P-loop containing nucleoside triphosphate hydrolase [IPR027417] (1)                                                                                                                                                                                                                                                                                                                                                                                                                                                                                                                                                                                                     | scaffold_3_mRNA_2629.1             | -                           | -                               |
| GF0028185 | 1                               | 0                        | 0                            | 0 Hypothetical protein (1)                                       | oxidoreductase activity [GO:0016491 molecular_function] (1); oxidation-reduction process [GO:0055114 biological_process] (1); nucleic acid binding [GO:0003676 molecular_function] (1); protein dimerization activity [GO:0046983 molecular_function] (1); amino acid binding [GO:0016597 molecular_function] (1); cellular amino acid biosynthetic process [GO:0008652 biological_process] (1); metabolic process [GO:0008152 biological_process] (1); NADP binding [GO:0050661 molecular_function] (1); aspartate kinase activity [GO:0004072 molecular_function] (1); cellular amino acid metabolic process [GO:0006520 biological_process] (1) | Aspartate kinase, conserved site [IPR03842] (1); Zinc finger, TTF-type [IPR006580] (1); Ribonuclease H-like domain [IPR012337] (1); GAIS-like ACT domain [IPR027795] (1); Homoserine dehydrogenase, catalytic [IPR001342] (1); Leucine-rich repeat domain, L domain-like [IPR032675] (1); Aspartate glutamate uridylylase kinase [IPR01048] (1); NAD(P)-binding domain [IPR016040] (1); HAT, C-terminal dimerisation domain [IPR008986] (1); Aspartate homoserine dehydrogenase, NAD-binding [IPR005106] (1); ACT domain [IPR02912] (1); Homoserine dehydrogenase, conserved site [IPR019811] (1); Aspartate kinase domain [IPR001341] (1); Domain of unknown function DUF4371 [IPR025398] (1) | scaffold_3_mRNA_2613.1             | -                           | -                               |
| GF0028184 | 1                               | 0                        | 0                            | 0 Hypothetical protein (1)                                       | ADP binding [GO:0043531 molecular_function] (1); protein binding [GO:0005515 molecular_function] (1)                                                                                                                                                                                                                                                                                                                                                                                                                                                                                                                                               | Leucine-rich repeat [IPR001611] (1); AAA+ ATPase domain [IPR003593] (1); NB-ARC [IPR02182] (1); P-loop containing nucleoside triphosphate hydrolase [IPR027417] (1); Winged helix-turn-helix DNA-binding domain [IPR011991] (1); Leucine-rich repeat domain, L domain-like [IPR032675] (1); Leucine-rich repeat, typical subtype [IPR003591] (1)                                                                                                                                                                                                                                                                                                                                               | scaffold_3_mRNA_2611.1             | -                           | -                               |
| GF0028183 | 1                               | 0                        | 0                            | 0 Hypothetical protein (1)                                       |                                                                                                                                                                                                                                                                                                                                                                                                                                                                                                                                                                                                                                                    |                                                                                                                                                                                                                                                                                                                                                                                                                                                                                                                                                                                                                                                                                                | scaffold_3_mRNA_2610.1             | -                           | -                               |
| GF0028182 | 1                               | 0                        | 0                            | 0 Hypothetical protein (1)                                       |                                                                                                                                                                                                                                                                                                                                                                                                                                                                                                                                                                                                                                                    |                                                                                                                                                                                                                                                                                                                                                                                                                                                                                                                                                                                                                                                                                                | scaffold_3_mRNA_2608.1             | -                           | -                               |
| GF0028181 | 1                               | 0                        | 0                            | 0 Hypothetical protein (1)                                       |                                                                                                                                                                                                                                                                                                                                                                                                                                                                                                                                                                                                                                                    |                                                                                                                                                                                                                                                                                                                                                                                                                                                                                                                                                                                                                                                                                                | scaffold_3_mRNA_2606.1             | -                           | -                               |
| GF0028180 | 1                               | 0                        | 0                            | 0 Hypothetical protein (1)                                       |                                                                                                                                                                                                                                                                                                                                                                                                                                                                                                                                                                                                                                                    |                                                                                                                                                                                                                                                                                                                                                                                                                                                                                                                                                                                                                                                                                                | scaffold_3_mRNA_2604.1             | -                           | -                               |
| GF0028179 | 1                               | 0                        | 0                            | 0 Hypothetical protein (1)                                       |                                                                                                                                                                                                                                                                                                                                                                                                                                                                                                                                                                                                                                                    |                                                                                                                                                                                                                                                                                                                                                                                                                                                                                                                                                                                                                                                                                                | scaffold_3_mRNA_2600.1             | -                           | -                               |
| GF0028178 | 1                               | 0                        | 0                            | 0 Hypothetical protein (1)                                       |                                                                                                                                                                                                                                                                                                                                                                                                                                                                                                                                                                                                                                                    |                                                                                                                                                                                                                                                                                                                                                                                                                                                                                                                                                                                                                                                                                                | scaffold_3_mRNA_2599.1             | -                           | -                               |
| GF0028177 | 1                               | 0                        | 0                            | 0 Hypothetical protein (1)                                       |                                                                                                                                                                                                                                                                                                                                                                                                                                                                                                                                                                                                                                                    |                                                                                                                                                                                                                                                                                                                                                                                                                                                                                                                                                                                                                                                                                                | scaffold_3_mRNA_2598.1             | -                           | -                               |
| GF0028176 | 1                               | 0                        | 0                            | 0 Hypothetical protein (1)                                       |                                                                                                                                                                                                                                                                                                                                                                                                                                                                                                                                                                                                                                                    |                                                                                                                                                                                                                                                                                                                                                                                                                                                                                                                                                                                                                                                                                                | scaffold_3_mRNA_2596.1             | -                           | -                               |
| GF0028175 | 1                               | 0                        | 0                            | 0 Salicylic acid carboxyl methyltransferase (1)                  | methyltransferase activity [GO:0008168 molecular_function] (1)                                                                                                                                                                                                                                                                                                                                                                                                                                                                                                                                                                                     | S-adenosyl-L-methionine-dependent methyltransferase [IPR029062] (1); SAM dependent carboxyl methyltransferase [IPR005299] (1)                                                                                                                                                                                                                                                                                                                                                                                                                                                                                                                                                                  | scaffold_3_mRNA_2589.1             | -                           | -                               |
| GF0028174 | 1                               | 0                        | 0                            | 0 Hypothetical protein (1)                                       |                                                                                                                                                                                                                                                                                                                                                                                                                                                                                                                                                                                                                                                    |                                                                                                                                                                                                                                                                                                                                                                                                                                                                                                                                                                                                                                                                                                | scaffold_3_mRNA_2587.1             | -                           | -                               |
| GF0028173 | 1                               | 0                        | 0                            | 0 Hypothetical protein (1)                                       | nucleic acid binding [GO:0003676 molecular_function] (1); zinc ion binding [GO:0008270 molecular_function] (1); protein binding [GO:0005515 molecular_function] (1)                                                                                                                                                                                                                                                                                                                                                                                                                                                                                | Zinc finger, CCHC-type [IPR001878] (1); Zinc finger, SWIM-type [IPR007527] (1); Leucine-rich repeat domain, L domain-like [IPR032675] (1); Zinc finger, PNZ-type [IPR006564] (1); F-box domain [IPR001810] (1)                                                                                                                                                                                                                                                                                                                                                                                                                                                                                 | scaffold_3_mRNA_2582.1             | -                           | -                               |
| GF0028172 | 1                               | 0                        | 0                            | 0 Hypothetical protein (1)                                       |                                                                                                                                                                                                                                                                                                                                                                                                                                                                                                                                                                                                                                                    |                                                                                                                                                                                                                                                                                                                                                                                                                                                                                                                                                                                                                                                                                                | scaffold_3_mRNA_2573.1             | -                           | -                               |
| GF0028171 | 1                               | 0                        | 0                            | 0 Hypothetical protein (1)                                       |                                                                                                                                                                                                                                                                                                                                                                                                                                                                                                                                                                                                                                                    |                                                                                                                                                                                                                                                                                                                                                                                                                                                                                                                                                                                                                                                                                                | scaffold_3_mRNA_2559.1             | -                           | -                               |
| GF0028170 | 1                               | 0                        | 0                            | 0 TMV resistance N (1)                                           |                                                                                                                                                                                                                                                                                                                                                                                                                                                                                                                                                                                                                                                    |                                                                                                                                                                                                                                                                                                                                                                                                                                                                                                                                                                                                                                                                                                | scaffold_3_mRNA_2531.1             | -                           | -                               |
| GF0028169 | 1                               | 0                        | 0                            | 0 Hypothetical protein (1)                                       |                                                                                                                                                                                                                                                                                                                                                                                                                                                                                                                                                                                                                                                    |                                                                                                                                                                                                                                                                                                                                                                                                                                                                                                                                                                                                                                                                                                | scaffold_3_mRNA_2529.1             | -                           | -                               |
| GF0028168 | 1                               | 0                        | 0                            | 0 General transcription factor 2-related zinc finger protein (1) | nucleic acid binding [GO:0003676 molecular_function] (1)                                                                                                                                                                                                                                                                                                                                                                                                                                                                                                                                                                                           | Domain of unknown function DUF4371 [IPR025398] (1); Zinc finger, TTF-type [IPR006580] (1); Ribonuclease H-like domain [IPR012337] (1)                                                                                                                                                                                                                                                                                                                                                                                                                                                                                                                                                          | scaffold_3_mRNA_2525.1             | -                           | -                               |
| GF0028167 | 1                               | 0                        | 0                            | 0 TSA: Wollemia nobilis transcribed RNA sequence (1)             | nucleic acid binding [GO:0003676 molecular_function] (1); zinc ion binding [GO:0008270 molecular_function] (1)                                                                                                                                                                                                                                                                                                                                                                                                                                                                                                                                     | Domain of unknown function DUF4283 [IPR025558] (1); Zinc finger, CCHC-type [IPR001878] (1); Zinc knuckle CX2CX4HX4C [IPR025836] (1)                                                                                                                                                                                                                                                                                                                                                                                                                                                                                                                                                            | scaffold_3_mRNA_2523.1             | -                           | -                               |
| GF0028166 | 1                               | 0                        | 0                            | 0 Hypothetical protein (1)                                       |                                                                                                                                                                                                                                                                                                                                                                                                                                                                                                                                                                                                                                                    |                                                                                                                                                                                                                                                                                                                                                                                                                                                                                                                                                                                                                                                                                                | scaffold_3_mRNA_2521.1             | -                           | -                               |
| GF0028165 | 1                               | 0                        | 0                            | 0 Hypothetical protein (1)                                       |                                                                                                                                                                                                                                                                                                                                                                                                                                                                                                                                                                                                                                                    |                                                                                                                                                                                                                                                                                                                                                                                                                                                                                                                                                                                                                                                                                                | scaffold_3_mRNA_2520.1             | -                           | -                               |

| ID        | Num in <i>C. clementiae</i> | Num in <i>C. uchiha</i> | Num in <i>P. trifoliate</i> | Note                                                                            | GO                                                                                                                                                                                                                                                                                                                                            | InterPro                                                                                                                                                                                                                                                                           | Members in <i>C. clementiae</i> | Members in <i>C. uchiha</i> | Members in <i>P. trifoliate</i> |
|-----------|-----------------------------|-------------------------|-----------------------------|---------------------------------------------------------------------------------|-----------------------------------------------------------------------------------------------------------------------------------------------------------------------------------------------------------------------------------------------------------------------------------------------------------------------------------------------|------------------------------------------------------------------------------------------------------------------------------------------------------------------------------------------------------------------------------------------------------------------------------------|---------------------------------|-----------------------------|---------------------------------|
| GF0028164 | 1                           | 0                       | 0                           | 0 Caffeic acid 3-O-methyltransferase (1)                                        | O-methyltransferase activity [GO:0008171 molecular_function] (1); methyltransferase activity [GO:0008168 molecular_function] (1)                                                                                                                                                                                                              | S-adenosyl-L-methionine-dependent methyltransferase [IPRO29063] (1); O-methyltransferase COMT-type [IPRO16461] (1); O-methyltransferase, family 2 [IPRO1077] (1)                                                                                                                   | scaffold_3_mRNA_2506.1          | -                           | -                               |
| GF0028163 | 1                           | 0                       | 0                           | 0 Hypothetical protein (1)                                                      |                                                                                                                                                                                                                                                                                                                                               |                                                                                                                                                                                                                                                                                    | scaffold_3_mRNA_2504.1          | -                           | -                               |
| GF0028162 | 1                           | 0                       | 0                           | 0 Hypothetical protein (1)                                                      |                                                                                                                                                                                                                                                                                                                                               |                                                                                                                                                                                                                                                                                    | scaffold_3_mRNA_2503.1          | -                           | -                               |
| GF0028161 | 1                           | 0                       | 0                           | 0 Hypothetical protein (1)                                                      |                                                                                                                                                                                                                                                                                                                                               |                                                                                                                                                                                                                                                                                    | scaffold_3_mRNA_2501.1          | -                           | -                               |
| GF0028160 | 1                           | 0                       | 0                           | 0 Hypothetical protein (1)                                                      |                                                                                                                                                                                                                                                                                                                                               |                                                                                                                                                                                                                                                                                    | scaffold_3_mRNA_2500.1          | -                           | -                               |
| GF0028159 | 1                           | 0                       | 0                           | 0 Hypothetical protein (1)                                                      |                                                                                                                                                                                                                                                                                                                                               |                                                                                                                                                                                                                                                                                    | scaffold_3_mRNA_2495.1          | -                           | -                               |
| GF0028158 | 1                           | 0                       | 0                           | 0 Retrotransposon ty1-copia subclass (1)                                        |                                                                                                                                                                                                                                                                                                                                               | Reverse transcriptase, RNA-dependent DNA polymerase [IPRO13103] (1)                                                                                                                                                                                                                | scaffold_3_mRNA_2490.1          | -                           | -                               |
| GF0028157 | 1                           | 0                       | 0                           | 0 Caffeic acid O-methyltransferase (1)                                          | methyltransferase activity [GO:0008168 molecular_function] (1); protein dimerization activity [GO:0046983 molecular_function] (1); O-methyltransferase activity [GO:0008171 molecular_function] (1)                                                                                                                                           | S-adenosyl-L-methionine-dependent methyltransferase [IPRO29063] (1); O-methyltransferase COMT-type [IPRO16461] (1); Plant methyltransferase dimerisation [IPRO12967] (1); O-methyltransferase, family 2 [IPRO1077] (1); Winged helix-turn-helix DNA-binding domain [IPRO11991] (1) | scaffold_3_mRNA_2486.1          | -                           | -                               |
| GF0028156 | 1                           | 0                       | 0                           | 0 Hypothetical protein (1)                                                      |                                                                                                                                                                                                                                                                                                                                               |                                                                                                                                                                                                                                                                                    | scaffold_3_mRNA_2483.1          | -                           | -                               |
| GF0028155 | 1                           | 0                       | 0                           | 0 Hypothetical protein (1)                                                      |                                                                                                                                                                                                                                                                                                                                               |                                                                                                                                                                                                                                                                                    | scaffold_3_mRNA_2482.1          | -                           | -                               |
| GF0028154 | 1                           | 0                       | 0                           | 0 Hypothetical protein (1)                                                      | oxidoreductase activity, acting on paired donors, with incorporation or reduction of molecular oxygen [GO:0016705 molecular_function] (1); oxidation-reduction process [GO:0055114 biological_process] (1); heme binding [GO:0020037 molecular_function] (1); iron ion binding [GO:0005506 molecular_function] (1)                            | Cytochrome P450 [IPRO01128] (1)                                                                                                                                                                                                                                                    | scaffold_3_mRNA_2481.1          | -                           | -                               |
| GF0028153 | 1                           | 0                       | 0                           | 0 Hypothetical protein (1)                                                      | nucleic acid binding [GO:0003676 molecular_function] (1); zinc ion binding [GO:0008270 molecular_function] (1)                                                                                                                                                                                                                                | Zinc finger, CCHC-type [IPRO01878] (1)                                                                                                                                                                                                                                             | scaffold_3_mRNA_2473.1          | -                           | -                               |
| GF0028152 | 1                           | 0                       | 0                           | 0 Hypothetical protein (1)                                                      |                                                                                                                                                                                                                                                                                                                                               |                                                                                                                                                                                                                                                                                    | scaffold_3_mRNA_2471.1          | -                           | -                               |
| GF0028151 | 1                           | 0                       | 0                           | 0 Hypothetical protein (1)                                                      |                                                                                                                                                                                                                                                                                                                                               |                                                                                                                                                                                                                                                                                    | scaffold_3_mRNA_2468.1          | -                           | -                               |
| GF0028150 | 1                           | 0                       | 0                           | 0 Hypothetical protein (1)                                                      |                                                                                                                                                                                                                                                                                                                                               |                                                                                                                                                                                                                                                                                    | scaffold_3_mRNA_2466.1          | -                           | -                               |
| GF0028149 | 1                           | 0                       | 0                           | 0 Caffeic acid O-methyltransferase (1)                                          | O-methyltransferase activity [GO:0008171 molecular_function] (1); protein dimerization activity [GO:0046983 molecular_function] (1); methyltransferase activity [GO:0008168 molecular_function] (1)                                                                                                                                           | S-adenosyl-L-methionine-dependent methyltransferase [IPRO29063] (1); O-methyltransferase, family 2 [IPRO1077] (1); Winged helix-turn-helix DNA-binding domain [IPRO11991] (1); Plant methyltransferase dimerisation [IPRO12967] (1); O-methyltransferase COMT-type [IPRO16461] (1) | scaffold_3_mRNA_2465.1          | -                           | -                               |
| GF0028148 | 1                           | 0                       | 0                           | 0 GDLSL esterase/lipase 7 (1)                                                   | hydrolase activity, acting on ester bonds [GO:0016788 molecular_function] (1)                                                                                                                                                                                                                                                                 | GDLSL lipase/esterase [IPRO01087] (1)                                                                                                                                                                                                                                              | scaffold_3_mRNA_2463.1          | -                           | -                               |
| GF0028147 | 1                           | 0                       | 0                           | 0 GDLSL esterase/lipase 7 (1)                                                   | hydrolase activity, acting on ester bonds [GO:0016788 molecular_function] (1)                                                                                                                                                                                                                                                                 | GDLSL lipase/esterase [IPRO01087] (1)                                                                                                                                                                                                                                              | scaffold_3_mRNA_2456.1          | -                           | -                               |
| GF0028146 | 1                           | 0                       | 0                           | 0 GDLSL-like Lipase/Acylhydrolase 0 superfamily protein, putative isoform 2 (1) |                                                                                                                                                                                                                                                                                                                                               |                                                                                                                                                                                                                                                                                    | scaffold_3_mRNA_2454.1          | -                           | -                               |
| GF0028145 | 1                           | 0                       | 0                           | 0 Hypothetical protein (1)                                                      |                                                                                                                                                                                                                                                                                                                                               |                                                                                                                                                                                                                                                                                    | scaffold_3_mRNA_2453.1          | -                           | -                               |
| GF0028144 | 1                           | 0                       | 0                           | 0 Hypothetical protein (1)                                                      |                                                                                                                                                                                                                                                                                                                                               | Leucine-rich repeat domain, L domain-like [IPRO32675] (1)                                                                                                                                                                                                                          | scaffold_3_mRNA_2452.1          | -                           | -                               |
| GF0028143 | 1                           | 0                       | 0                           | 0 Hypothetical protein (1)                                                      |                                                                                                                                                                                                                                                                                                                                               |                                                                                                                                                                                                                                                                                    | scaffold_3_mRNA_2450.1          | -                           | -                               |
| GF0028142 | 1                           | 0                       | 0                           | 0 Hypothetical protein (1)                                                      |                                                                                                                                                                                                                                                                                                                                               |                                                                                                                                                                                                                                                                                    | scaffold_3_mRNA_2446.1          | -                           | -                               |
| GF0028141 | 1                           | 0                       | 0                           | 0 Hypothetical protein (1)                                                      |                                                                                                                                                                                                                                                                                                                                               |                                                                                                                                                                                                                                                                                    | scaffold_3_mRNA_2444.1          | -                           | -                               |
| GF0028140 | 1                           | 0                       | 0                           | 0 Monosaccharide transport protein (1)                                          |                                                                                                                                                                                                                                                                                                                                               |                                                                                                                                                                                                                                                                                    | scaffold_3_mRNA_2440.1          | -                           | -                               |
| GF0028139 | 1                           | 0                       | 0                           | 0 Hypothetical protein (1)                                                      |                                                                                                                                                                                                                                                                                                                                               | Reverse transcriptase domain [IPRO00477] (1)                                                                                                                                                                                                                                       | scaffold_3_mRNA_2437.1          | -                           | -                               |
| GF0028138 | 1                           | 0                       | 0                           | 0 Hypothetical protein (1)                                                      |                                                                                                                                                                                                                                                                                                                                               |                                                                                                                                                                                                                                                                                    | scaffold_3_mRNA_2436.1          | -                           | -                               |
| GF0028137 | 1                           | 0                       | 0                           | 0 Hypothetical protein (1)                                                      | catalytic activity [GO:0003824 molecular_function] (1); oxidation-reduction process [GO:0055114 biological_process] (1); oxidoreductase activity [GO:0016491 molecular_function] (1); FMN binding [GO:0010181 molecular_function] (1)                                                                                                         | Aldolase-type TIM barrel [IPRO13785] (1); NADH:flavin oxidoreductase/NADH oxidase, N-terminal [IPRO01155] (1)                                                                                                                                                                      | scaffold_3_mRNA_2432.1          | -                           | -                               |
| GF0028136 | 1                           | 0                       | 0                           | 0 Hypothetical protein (1)                                                      |                                                                                                                                                                                                                                                                                                                                               |                                                                                                                                                                                                                                                                                    | scaffold_3_mRNA_2420.1          | -                           | -                               |
| GF0028135 | 1                           | 0                       | 0                           | 0 Hypothetical protein (1)                                                      |                                                                                                                                                                                                                                                                                                                                               |                                                                                                                                                                                                                                                                                    | scaffold_3_mRNA_2416.1          | -                           | -                               |
| GF0028134 | 1                           | 0                       | 0                           | 0 Cytokinin riboside 5'-monophosphate phosphoribohydrolase (1)                  |                                                                                                                                                                                                                                                                                                                                               | LOG family [IPRO31100] (1)                                                                                                                                                                                                                                                         | scaffold_3_mRNA_2415.1          | -                           | -                               |
| GF0028133 | 1                           | 0                       | 0                           | 0 Hypothetical protein (1)                                                      |                                                                                                                                                                                                                                                                                                                                               |                                                                                                                                                                                                                                                                                    | scaffold_3_mRNA_2412.1          | -                           | -                               |
| GF0028132 | 1                           | 0                       | 0                           | 0 Hypothetical protein (1)                                                      | GTP binding [GO:0005525 molecular_function] (1)                                                                                                                                                                                                                                                                                               | AGI1-type guanine nucleotide-binding (G) domain [IPRO06703] (1); P-loop containing nucleoside triphosphate hydrolase [IPRO27417] (1)                                                                                                                                               | scaffold_3_mRNA_2411.1          | -                           | -                               |
| GF0028131 | 1                           | 0                       | 0                           | 0 Hypothetical protein (1)                                                      |                                                                                                                                                                                                                                                                                                                                               |                                                                                                                                                                                                                                                                                    | scaffold_3_mRNA_2410.1          | -                           | -                               |
| GF0028130 | 1                           | 0                       | 0                           | 0 Cytokinin riboside 5'-monophosphate phosphoribohydrolase (1)                  |                                                                                                                                                                                                                                                                                                                                               | LOG family [IPRO31100] (1)                                                                                                                                                                                                                                                         | scaffold_3_mRNA_2406.1          | -                           | -                               |
| GF0028129 | 1                           | 0                       | 0                           | 0 Hypothetical protein (1)                                                      |                                                                                                                                                                                                                                                                                                                                               |                                                                                                                                                                                                                                                                                    | scaffold_3_mRNA_2405.1          | -                           | -                               |
| GF0028128 | 1                           | 0                       | 0                           | 0 Hypothetical protein (1)                                                      |                                                                                                                                                                                                                                                                                                                                               | Retrotransposon gag domain [IPRO05162] (1)                                                                                                                                                                                                                                         | scaffold_3_mRNA_2401.1          | -                           | -                               |
| GF0028127 | 1                           | 0                       | 0                           | 0 Hypothetical protein (1)                                                      | 3'-5' exonuclease activity [GO:0008408 molecular_function] (1); nucleobase-containing compound metabolic process [GO:0006139 biological_process] (1); nucleic acid binding [GO:0003676 molecular_function] (1)                                                                                                                                | 3'-5' exonuclease domain [IPRO02562] (1); Ribonuclease H-like domain [IPRO12337] (1)                                                                                                                                                                                               | scaffold_3_mRNA_2395.1          | -                           | -                               |
| GF0028126 | 1                           | 0                       | 0                           | 0 Hypothetical protein (1)                                                      |                                                                                                                                                                                                                                                                                                                                               | LOG family [IPRO31100] (1)                                                                                                                                                                                                                                                         | scaffold_3_mRNA_2388.1          | -                           | -                               |
| GF0028125 | 1                           | 0                       | 0                           | 0 Hypothetical protein (1)                                                      |                                                                                                                                                                                                                                                                                                                                               |                                                                                                                                                                                                                                                                                    | scaffold_3_mRNA_2385.1          | -                           | -                               |
| GF0028124 | 1                           | 0                       | 0                           | 0 Hypothetical protein (1)                                                      |                                                                                                                                                                                                                                                                                                                                               | Transposon, En/Spm-like [IPRO04242] (1)                                                                                                                                                                                                                                            | scaffold_3_mRNA_2383.1          | -                           | -                               |
| GF0028123 | 1                           | 0                       | 0                           | 0 Hypothetical protein (1)                                                      | proteolysis [GO:0006508 biological_process] (1); cysteine-type peptidase activity [GO:0008234 molecular_function] (1)                                                                                                                                                                                                                         | Ulp1 protease family, C-terminal catalytic domain [IPRO03653] (1); Probable transposase, Pina/En/Spm, plant [IPRO04252] (1); Domain of unknown function DUF4218 [IPRO25452] (1)                                                                                                    | scaffold_3_mRNA_2382.1          | -                           | -                               |
| GF0028122 | 1                           | 0                       | 0                           | 0 Protein AGI1 (1)                                                              | GTP binding [GO:0005525 molecular_function] (1)                                                                                                                                                                                                                                                                                               | AGI1-type guanine nucleotide-binding (G) domain [IPRO06703] (1); P-loop containing nucleoside triphosphate hydrolase [IPRO27417] (1)                                                                                                                                               | scaffold_3_mRNA_2368.1          | -                           | -                               |
| GF0028121 | 1                           | 0                       | 0                           | 0 Hypothetical protein (1)                                                      | nucleus [GO:0005634 cellular_component] (1); nucleic acid binding [GO:0003676 molecular_function] (1); zinc ion binding [GO:0008270 molecular_function] (1); regulation of transcription, DNA-templated [GO:0006355 biological_process] (1); transcription factor activity, sequence-specific DNA binding [GO:0003700 molecular_function] (1) | Transcription factor, K-box [IPRO02487] (1); Zinc finger, CCHC-type [IPRO01878] (1)                                                                                                                                                                                                | scaffold_3_mRNA_2367.1          | -                           | -                               |
| GF0028120 | 1                           | 0                       | 0                           | 0 Hypothetical protein (1)                                                      | GTP binding [GO:0005525 molecular_function] (1); hydrolase activity, acting on ester bonds [GO:0016788 molecular_function] (1)                                                                                                                                                                                                                | P-loop containing nucleoside triphosphate hydrolase [IPRO27417] (1); Harbinger transposase-derived protein [IPRO06912] (1); AGI1-type guanine nucleotide-binding (G) domain [IPRO06703] (1)                                                                                        | scaffold_3_mRNA_2366.1          | -                           | -                               |
| GF0028119 | 1                           | 0                       | 0                           | 0 Hypothetical protein (1)                                                      |                                                                                                                                                                                                                                                                                                                                               | Regulator of nonsense-mediated decay, UPF3 [IPRO05120] (1)                                                                                                                                                                                                                         | scaffold_3_mRNA_2363.1          | -                           | -                               |
| GF0028118 | 1                           | 0                       | 0                           | 0 Hypothetical protein (1)                                                      |                                                                                                                                                                                                                                                                                                                                               |                                                                                                                                                                                                                                                                                    | scaffold_3_mRNA_2354.1          | -                           | -                               |
| GF0028117 | 1                           | 0                       | 0                           | 0 Pre-eoRNA-processing factor 17 (1)                                            | catalytic step 2 spliceosome [GO:0071013 cellular_component] (1); mRNA splicing, via spliceosome [GO:000398 biological_process] (1); protein binding [GO:0005515 molecular_function] (1)                                                                                                                                                      | WD40-repeat-containing domain [IPRO17986] (1); WD40 repeat [IPRO01680] (1); WD40 repeat, conserved site [IPRO19775] (1); WD40-Y/T/N repeat-like-containing domain [IPRO15943] (1); G-protein beta WD-40 repeat [IPRO20472] (1); Pre-mRNA-processing factor 17 [IPRO32847] (1)      | scaffold_3_mRNA_2353.1          | -                           | -                               |
| GF0028116 | 1                           | 0                       | 0                           | 0 Isoflavone reductase-like protein 4 isoform 2 (1)                             |                                                                                                                                                                                                                                                                                                                                               | NAD(P)-binding domain [IPRO16040] (1); NmrA-like domain [IPRO08030] (1)                                                                                                                                                                                                            | scaffold_3_mRNA_2350.1          | -                           | -                               |
| GF0028115 | 1                           | 0                       | 0                           | 0 Hypothetical protein (1)                                                      |                                                                                                                                                                                                                                                                                                                                               |                                                                                                                                                                                                                                                                                    | scaffold_3_mRNA_2341.1          | -                           | -                               |
| GF0028114 | 1                           | 0                       | 0                           | 0 Hypothetical protein (1)                                                      |                                                                                                                                                                                                                                                                                                                                               |                                                                                                                                                                                                                                                                                    | scaffold_3_mRNA_2338.1          | -                           | -                               |
| GF0028113 | 1                           | 0                       | 0                           | 0 Hypothetical protein (1)                                                      |                                                                                                                                                                                                                                                                                                                                               |                                                                                                                                                                                                                                                                                    | scaffold_3_mRNA_2337.1          | -                           | -                               |
| GF0028112 | 1                           | 0                       | 0                           | 0 Hypothetical protein (1)                                                      |                                                                                                                                                                                                                                                                                                                                               |                                                                                                                                                                                                                                                                                    | scaffold_3_mRNA_2336.1          | -                           | -                               |
| GF0028111 | 1                           | 0                       | 0                           | 0 Hypothetical protein (1)                                                      |                                                                                                                                                                                                                                                                                                                                               |                                                                                                                                                                                                                                                                                    | scaffold_3_mRNA_2331.1          | -                           | -                               |
| GF0028110 | 1                           | 0                       | 0                           | 0 Flery kosmanan benzylic ether reductase (1)                                   |                                                                                                                                                                                                                                                                                                                                               | NAD(P)-binding domain [IPRO16040] (1); NmrA-like domain [IPRO08030] (1)                                                                                                                                                                                                            | scaffold_3_mRNA_2329.1          | -                           | -                               |
| GF0028109 | 1                           | 0                       | 0                           | 0 Polynucleotidyl transferase, Ribonuclease H fold (1)                          | nucleic acid binding [GO:0003676 molecular_function] (1)                                                                                                                                                                                                                                                                                      | Ribonuclease H-like domain [IPRO12337] (1); Reverse transcriptase zinc-binding domain [IPRO26960] (1)                                                                                                                                                                              | scaffold_3_mRNA_2302.1          | -                           | -                               |
| GF0028108 | 1                           | 0                       | 0                           | 0 Putative ribonuclease H protein (1)                                           |                                                                                                                                                                                                                                                                                                                                               | Reverse transcriptase zinc-binding domain [IPRO26960] (1)                                                                                                                                                                                                                          | scaffold_3_mRNA_2301.1          | -                           | -                               |

| ID        | Num. in <i>C. clementiae</i> | Num. in <i>C. uchihae</i> | Num. in <i>P. trifoliata</i> | Note                                                           | GO                                                                                                                                                                                                                                                                                                                                                                                                                                                     | InterPro                                                                                                                                                                                                                                                            | Members in <i>C. clementiae</i> | Members in <i>C. uchihae</i> | Members in <i>P. trifoliata</i> |
|-----------|------------------------------|---------------------------|------------------------------|----------------------------------------------------------------|--------------------------------------------------------------------------------------------------------------------------------------------------------------------------------------------------------------------------------------------------------------------------------------------------------------------------------------------------------------------------------------------------------------------------------------------------------|---------------------------------------------------------------------------------------------------------------------------------------------------------------------------------------------------------------------------------------------------------------------|---------------------------------|------------------------------|---------------------------------|
| GF0028107 | 1                            | 0                         | 0                            | 0 Monosaccharide transport protein (1)                         |                                                                                                                                                                                                                                                                                                                                                                                                                                                        |                                                                                                                                                                                                                                                                     | scaffold_3_mRNA_2298.1          | -                            | -                               |
| GF0028106 | 1                            | 0                         | 0                            | 0 Hypothetical protein (1)                                     |                                                                                                                                                                                                                                                                                                                                                                                                                                                        |                                                                                                                                                                                                                                                                     | scaffold_3_mRNA_2296.1          | -                            | -                               |
| GF0028105 | 1                            | 0                         | 0                            | 0 Hypothetical protein (1)                                     |                                                                                                                                                                                                                                                                                                                                                                                                                                                        |                                                                                                                                                                                                                                                                     | scaffold_3_mRNA_2294.1          | -                            | -                               |
| GF0028104 | 1                            | 0                         | 0                            | 0 Hypothetical protein (1)                                     | DNA binding [GO:0003677 molecular_function] (1); hydrolase activity, hydrolyzing O-glycosyl compounds [GO:0004553 molecular_function] (1); carbohydrate metabolic process [GO:0005975 biological_process] (1); catalytic activity [GO:0003824 molecular_function] (1); zinc ion binding [GO:0008270 molecular_function] (1); transposition, DNA-mediated [GO:0006313 biological_process] (1); transposase activity [GO:0004803 molecular_function] (1) | Glycoside hydrolase superfamily [IPR017853] (1); Zinc finger, SWIM-type [IPR007527] (1); Zinc finger, PMZ-type [IPR006564] (1); Transposase, mutator type [IPR001207] (1); Glycoside hydrolase, family 27 [IPR002241] (1); Aldolase-type TIM barrel [IPR013785] (1) | scaffold_3_mRNA_2290.1          | -                            | -                               |
| GF0028103 | 1                            | 0                         | 0                            | 0 Hypothetical protein (1)                                     |                                                                                                                                                                                                                                                                                                                                                                                                                                                        |                                                                                                                                                                                                                                                                     | scaffold_3_mRNA_2288.1          | -                            | -                               |
| GF0028102 | 1                            | 0                         | 0                            | 0 Hypothetical protein (1)                                     | membrane [GO:0016020 cellular_component] (1); transport [GO:0006810 biological_process] (1); transporter activity [GO:0005215 molecular_function] (1)                                                                                                                                                                                                                                                                                                  | Major intrinsic protein [IPR000425] (1); Aquaporin transporter [IPR034294] (1); Major intrinsic protein, conserved site [IPR022357] (1); Aquaporin-like [IPR023271] (1)                                                                                             | scaffold_3_mRNA_2283.1          | -                            | -                               |
| GF0028101 | 1                            | 0                         | 0                            | 0 Hypothetical protein (1)                                     |                                                                                                                                                                                                                                                                                                                                                                                                                                                        |                                                                                                                                                                                                                                                                     | scaffold_3_mRNA_2272.1          | -                            | -                               |
| GF0028100 | 1                            | 0                         | 0                            | 0 Hypothetical protein (1)                                     | nucleic acid binding [GO:0003676 molecular_function] (1)                                                                                                                                                                                                                                                                                                                                                                                               | Domain of unknown function DUF4283 [IPR025558] (1)                                                                                                                                                                                                                  | scaffold_3_mRNA_2269.1          | -                            | -                               |
| GF0028099 | 1                            | 0                         | 0                            | 0 Hypothetical protein (1)                                     | nucleic acid binding [GO:0003676 molecular_function] (1); DNA integration [GO:0015074 biological_process] (1)                                                                                                                                                                                                                                                                                                                                          | Ribonuclease H-like domain [IPR012337] (1)                                                                                                                                                                                                                          | scaffold_3_mRNA_2249.1          | -                            | -                               |
| GF0028098 | 1                            | 0                         | 0                            | 0 DNARNA polymerases superfamily protein (1)                   |                                                                                                                                                                                                                                                                                                                                                                                                                                                        |                                                                                                                                                                                                                                                                     | scaffold_3_mRNA_2247.1          | -                            | -                               |
| GF0028097 | 1                            | 0                         | 0                            | 0 Hypothetical protein (1)                                     |                                                                                                                                                                                                                                                                                                                                                                                                                                                        |                                                                                                                                                                                                                                                                     | scaffold_3_mRNA_2246.1          | -                            | -                               |
| GF0028096 | 1                            | 0                         | 0                            | 0 Hypothetical protein (1)                                     |                                                                                                                                                                                                                                                                                                                                                                                                                                                        |                                                                                                                                                                                                                                                                     | scaffold_3_mRNA_2244.1          | -                            | -                               |
| GF0028095 | 1                            | 0                         | 0                            | 0 Cytokinin riboside 5'-monophosphate phosphoribohydrolase (1) |                                                                                                                                                                                                                                                                                                                                                                                                                                                        | LOG family [IPR031100] (1)                                                                                                                                                                                                                                          | scaffold_3_mRNA_2243.1          | -                            | -                               |
| GF0028094 | 1                            | 0                         | 0                            | 0 Hypothetical protein (1)                                     |                                                                                                                                                                                                                                                                                                                                                                                                                                                        |                                                                                                                                                                                                                                                                     | scaffold_3_mRNA_2241.1          | -                            | -                               |
| GF0028093 | 1                            | 0                         | 0                            | 0 Hypothetical protein (1)                                     |                                                                                                                                                                                                                                                                                                                                                                                                                                                        |                                                                                                                                                                                                                                                                     | scaffold_3_mRNA_2239.1          | -                            | -                               |
| GF0028092 | 1                            | 0                         | 0                            | 0 Kunitz trypsin inhibitor (1)                                 | endopeptidase inhibitor activity [GO:0004866 molecular_function] (1)                                                                                                                                                                                                                                                                                                                                                                                   | Kunitz inhibitor ST1-like [IPR011065] (1); Proteinase inhibitor I3, Kunitz legume [IPR002160] (1)                                                                                                                                                                   | scaffold_3_mRNA_2232.1          | -                            | -                               |
| GF0028091 | 1                            | 0                         | 0                            | 0 Kunitz trypsin inhibitor (1)                                 | endopeptidase inhibitor activity [GO:0004866 molecular_function] (1)                                                                                                                                                                                                                                                                                                                                                                                   | Kunitz inhibitor ST1-like [IPR011065] (1); Proteinase inhibitor I3, Kunitz legume [IPR002160] (1)                                                                                                                                                                   | scaffold_3_mRNA_2230.1          | -                            | -                               |
| GF0028090 | 1                            | 0                         | 0                            | 0 Hypothetical protein (1)                                     |                                                                                                                                                                                                                                                                                                                                                                                                                                                        |                                                                                                                                                                                                                                                                     | scaffold_3_mRNA_2228.1          | -                            | -                               |
| GF0028089 | 1                            | 0                         | 0                            | 0 Hypothetical protein (1)                                     | nucleic acid binding [GO:0003676 molecular_function] (1)                                                                                                                                                                                                                                                                                                                                                                                               | Ribonuclease H-like domain [IPR012337] (1); GRAM domain [IPR004182] (1)                                                                                                                                                                                             | scaffold_3_mRNA_2220.1          | -                            | -                               |
| GF0028088 | 1                            | 0                         | 0                            | 0 Miraculin (1)                                                | endopeptidase inhibitor activity [GO:0004866 molecular_function] (1)                                                                                                                                                                                                                                                                                                                                                                                   | Proteinase inhibitor I3, Kunitz legume [IPR002160] (1); Kunitz inhibitor ST1-like [IPR011065] (1)                                                                                                                                                                   | scaffold_3_mRNA_2219.1          | -                            | -                               |
| GF0028087 | 1                            | 0                         | 0                            | 0 Cytokinin riboside 5'-monophosphate phosphoribohydrolase (1) |                                                                                                                                                                                                                                                                                                                                                                                                                                                        |                                                                                                                                                                                                                                                                     | scaffold_3_mRNA_2216.1          | -                            | -                               |
| GF0028086 | 1                            | 0                         | 0                            | 0 Hypothetical protein (1)                                     | regulation of transcription, DNA-templated [GO:0006355 biological_process] (1); nucleic acid binding [GO:0003676 molecular_function] (1)                                                                                                                                                                                                                                                                                                               | Carboxy-terminal nucleic acid-binding protein [IPR025688] (1)                                                                                                                                                                                                       | scaffold_3_mRNA_2215.1          | -                            | -                               |
| GF0028085 | 1                            | 0                         | 0                            | 0 Hypothetical protein (1)                                     |                                                                                                                                                                                                                                                                                                                                                                                                                                                        |                                                                                                                                                                                                                                                                     | scaffold_3_mRNA_2214.1          | -                            | -                               |
| GF0028084 | 1                            | 0                         | 0                            | 0 Cytokinin riboside 5'-monophosphate phosphoribohydrolase (1) |                                                                                                                                                                                                                                                                                                                                                                                                                                                        |                                                                                                                                                                                                                                                                     | scaffold_3_mRNA_2213.1          | -                            | -                               |
| GF0028083 | 1                            | 0                         | 0                            | 0 Hypothetical protein (1)                                     |                                                                                                                                                                                                                                                                                                                                                                                                                                                        |                                                                                                                                                                                                                                                                     | scaffold_3_mRNA_2211.1          | -                            | -                               |
| GF0028082 | 1                            | 0                         | 0                            | 0 Hypothetical protein (1)                                     |                                                                                                                                                                                                                                                                                                                                                                                                                                                        |                                                                                                                                                                                                                                                                     | scaffold_3_mRNA_2210.1          | -                            | -                               |
| GF0028081 | 1                            | 0                         | 0                            | 0 Hypothetical protein (1)                                     |                                                                                                                                                                                                                                                                                                                                                                                                                                                        |                                                                                                                                                                                                                                                                     | scaffold_3_mRNA_2208.1          | -                            | -                               |
| GF0028080 | 1                            | 0                         | 0                            | 0 Hypothetical protein (1)                                     |                                                                                                                                                                                                                                                                                                                                                                                                                                                        |                                                                                                                                                                                                                                                                     | scaffold_3_mRNA_2202.1          | -                            | -                               |
| GF0028079 | 1                            | 0                         | 0                            | 0 Hypothetical protein (1)                                     |                                                                                                                                                                                                                                                                                                                                                                                                                                                        |                                                                                                                                                                                                                                                                     | scaffold_3_mRNA_2201.1          | -                            | -                               |
| GF0028078 | 1                            | 0                         | 0                            | 0 Hypothetical protein (1)                                     | endopeptidase inhibitor activity [GO:0004866 molecular_function] (1)                                                                                                                                                                                                                                                                                                                                                                                   | Proteinase inhibitor I3, Kunitz legume [IPR002160] (1); Kunitz inhibitor ST1-like [IPR011065] (1)                                                                                                                                                                   | scaffold_3_mRNA_2199.1          | -                            | -                               |
| GF0028077 | 1                            | 0                         | 0                            | 0 Miraculin (1)                                                | endopeptidase inhibitor activity [GO:0004866 molecular_function] (1)                                                                                                                                                                                                                                                                                                                                                                                   | Proteinase inhibitor I3, Kunitz legume [IPR002160] (1); Kunitz inhibitor ST1-like [IPR011065] (1)                                                                                                                                                                   | scaffold_3_mRNA_2195.1          | -                            | -                               |
| GF0028076 | 1                            | 0                         | 0                            | 0 Hypothetical protein (1)                                     |                                                                                                                                                                                                                                                                                                                                                                                                                                                        |                                                                                                                                                                                                                                                                     | scaffold_3_mRNA_2193.1          | -                            | -                               |
| GF0028075 | 1                            | 0                         | 0                            | 0 Hypothetical protein (1)                                     | proteolysis [GO:0006508 biological_process] (1); cysteine-type peptidase activity [GO:0008234 molecular_function] (1)                                                                                                                                                                                                                                                                                                                                  | Upl1 protease family, C-terminal catalytic domain [IPR003653] (1)                                                                                                                                                                                                   | scaffold_3_mRNA_2192.1          | -                            | -                               |
| GF0028074 | 1                            | 0                         | 0                            | 0 Hypothetical protein (1)                                     | nucleic acid binding [GO:0003676 molecular_function] (1); protein dimerization activity [GO:0046983 molecular_function] (1)                                                                                                                                                                                                                                                                                                                            | Ribonuclease H-like domain [IPR012337] (1); HAT, C-terminal dimerisation domain [IPR088906] (1)                                                                                                                                                                     | scaffold_3_mRNA_2190.1          | -                            | -                               |
| GF0028073 | 1                            | 0                         | 0                            | 0 Hypothetical protein (1)                                     |                                                                                                                                                                                                                                                                                                                                                                                                                                                        |                                                                                                                                                                                                                                                                     | scaffold_3_mRNA_2181.1          | -                            | -                               |
| GF0028072 | 1                            | 0                         | 0                            | 0 Hypothetical protein (1)                                     |                                                                                                                                                                                                                                                                                                                                                                                                                                                        |                                                                                                                                                                                                                                                                     | scaffold_3_mRNA_2176.1          | -                            | -                               |
| GF0028071 | 1                            | 0                         | 0                            | 0 Hypothetical protein (1)                                     |                                                                                                                                                                                                                                                                                                                                                                                                                                                        |                                                                                                                                                                                                                                                                     | scaffold_3_mRNA_2174.1          | -                            | -                               |
| GF0028070 | 1                            | 0                         | 0                            | 0 Cytokinin riboside 5'-monophosphate phosphoribohydrolase (1) |                                                                                                                                                                                                                                                                                                                                                                                                                                                        | LOG family [IPR031100] (1); Cytokinin riboside 5'-monophosphate phosphoribohydrolase LOG [IPR005269] (1)                                                                                                                                                            | scaffold_3_mRNA_2173.1          | -                            | -                               |
| GF0028069 | 1                            | 0                         | 0                            | 0 Hypothetical protein (1)                                     |                                                                                                                                                                                                                                                                                                                                                                                                                                                        |                                                                                                                                                                                                                                                                     | scaffold_3_mRNA_2172.1          | -                            | -                               |
| GF0028068 | 1                            | 0                         | 0                            | 0 Hypothetical protein (1)                                     |                                                                                                                                                                                                                                                                                                                                                                                                                                                        |                                                                                                                                                                                                                                                                     | scaffold_3_mRNA_2171.1          | -                            | -                               |
| GF0028067 | 1                            | 0                         | 0                            | 0 LRR receptor-like serine/threonine-protein kinase GS01 (1)   | protein binding [GO:0005515 molecular_function] (1)                                                                                                                                                                                                                                                                                                                                                                                                    | Leucine-rich repeat, typical subtype [IPR003591] (1); Leucine-rich repeat domain, L domain-like [IPR032675] (1); Leucine-rich repeat [IPR001611] (1)                                                                                                                | scaffold_3_mRNA_2169.1          | -                            | -                               |
| GF0028066 | 1                            | 0                         | 0                            | 0 Nodulin Mn2+/EamA-like transporter family protein (1)        | transmembrane transporter activity [GO:0022857 molecular_function] (1); membrane [GO:0016020 cellular_component] (1); integral component of membrane [GO:0016021 cellular_component] (1)                                                                                                                                                                                                                                                               | WAT1-related protein [IPR030184] (1); Aspartic peptidase domain [IPR021109] (1); EamA domain [IPR000620] (1)                                                                                                                                                        | scaffold_3_mRNA_2166.1          | -                            | -                               |
| GF0028065 | 1                            | 0                         | 0                            | 0 Hypothetical protein (1)                                     |                                                                                                                                                                                                                                                                                                                                                                                                                                                        |                                                                                                                                                                                                                                                                     | scaffold_3_mRNA_2159.1          | -                            | -                               |
| GF0028064 | 1                            | 0                         | 0                            | 0 Hypothetical protein (1)                                     |                                                                                                                                                                                                                                                                                                                                                                                                                                                        |                                                                                                                                                                                                                                                                     | scaffold_3_mRNA_2156.1          | -                            | -                               |
| GF0028063 | 1                            | 0                         | 0                            | 0 Hypothetical protein (1)                                     |                                                                                                                                                                                                                                                                                                                                                                                                                                                        |                                                                                                                                                                                                                                                                     | scaffold_3_mRNA_2152.1          | -                            | -                               |
| GF0028062 | 1                            | 0                         | 0                            | 0 Hypothetical protein (1)                                     |                                                                                                                                                                                                                                                                                                                                                                                                                                                        |                                                                                                                                                                                                                                                                     | scaffold_3_mRNA_2146.1          | -                            | -                               |
| GF0028061 | 1                            | 0                         | 0                            | 0 Cytokinin riboside 5'-monophosphate phosphoribohydrolase (1) |                                                                                                                                                                                                                                                                                                                                                                                                                                                        | LOG family [IPR031100] (1)                                                                                                                                                                                                                                          | scaffold_3_mRNA_2145.1          | -                            | -                               |
| GF0028060 | 1                            | 0                         | 0                            | 0 Hypothetical protein (1)                                     |                                                                                                                                                                                                                                                                                                                                                                                                                                                        |                                                                                                                                                                                                                                                                     | scaffold_3_mRNA_2144.1          | -                            | -                               |
| GF0028059 | 1                            | 0                         | 0                            | 0 Hypothetical protein (1)                                     |                                                                                                                                                                                                                                                                                                                                                                                                                                                        |                                                                                                                                                                                                                                                                     | scaffold_3_mRNA_2143.1          | -                            | -                               |
| GF0028058 | 1                            | 0                         | 0                            | 0 Hypothetical protein (1)                                     | omega peptidase activity [GO:0008242 molecular_function] (1); glutamine metabolic process [GO:0006541 biological_process] (1); catalytic activity [GO:0003824 molecular_function] (1)                                                                                                                                                                                                                                                                  | Peptidase C26, gamma-glutamyl hydrolase [IPR015527] (1)                                                                                                                                                                                                             | scaffold_3_mRNA_2134.1          | -                            | -                               |
| GF0028057 | 1                            | 0                         | 0                            | 0 Hypothetical protein (1)                                     |                                                                                                                                                                                                                                                                                                                                                                                                                                                        |                                                                                                                                                                                                                                                                     | scaffold_3_mRNA_2133.1          | -                            | -                               |
| GF0028056 | 1                            | 0                         | 0                            | 0 Hypothetical protein (1)                                     |                                                                                                                                                                                                                                                                                                                                                                                                                                                        |                                                                                                                                                                                                                                                                     | scaffold_3_mRNA_2132.1          | -                            | -                               |
| GF0028055 | 1                            | 0                         | 0                            | 0 Hypothetical protein (1)                                     |                                                                                                                                                                                                                                                                                                                                                                                                                                                        |                                                                                                                                                                                                                                                                     | scaffold_3_mRNA_2131.1          | -                            | -                               |
| GF0028054 | 1                            | 0                         | 0                            | 0 Hypothetical protein (1)                                     |                                                                                                                                                                                                                                                                                                                                                                                                                                                        |                                                                                                                                                                                                                                                                     | scaffold_3_mRNA_2129.1          | -                            | -                               |
| GF0028053 | 1                            | 0                         | 0                            | 0 Hypothetical protein (1)                                     |                                                                                                                                                                                                                                                                                                                                                                                                                                                        |                                                                                                                                                                                                                                                                     | scaffold_3_mRNA_2128.1          | -                            | -                               |
| GF0028052 | 1                            | 0                         | 0                            | 0 Cytokinin riboside 5'-monophosphate phosphoribohydrolase (1) |                                                                                                                                                                                                                                                                                                                                                                                                                                                        | LOG family [IPR031100] (1)                                                                                                                                                                                                                                          | scaffold_3_mRNA_2127.1          | -                            | -                               |
| GF0028051 | 1                            | 0                         | 0                            | 0 Hypothetical protein (1)                                     |                                                                                                                                                                                                                                                                                                                                                                                                                                                        |                                                                                                                                                                                                                                                                     | scaffold_3_mRNA_2126.1          | -                            | -                               |
| GF0028050 | 1                            | 0                         | 0                            | 0 Hypothetical protein (1)                                     |                                                                                                                                                                                                                                                                                                                                                                                                                                                        |                                                                                                                                                                                                                                                                     | scaffold_3_mRNA_2125.1          | -                            | -                               |
| GF0028049 | 1                            | 0                         | 0                            | 0 Hypothetical protein (1)                                     |                                                                                                                                                                                                                                                                                                                                                                                                                                                        |                                                                                                                                                                                                                                                                     | scaffold_3_mRNA_2124.1          | -                            | -                               |
| GF0028048 | 1                            | 0                         | 0                            | 0 Hypothetical protein (1)                                     |                                                                                                                                                                                                                                                                                                                                                                                                                                                        |                                                                                                                                                                                                                                                                     | scaffold_3_mRNA_2123.1          | -                            | -                               |
| GF0028047 | 1                            | 0                         | 0                            | 0 Cytokinin riboside 5'-monophosphate phosphoribohydrolase (1) |                                                                                                                                                                                                                                                                                                                                                                                                                                                        | LOG family [IPR031100] (1)                                                                                                                                                                                                                                          | scaffold_3_mRNA_2120.1          | -                            | -                               |
| GF0028046 | 1                            | 0                         | 0                            | 0 Hypothetical protein (1)                                     |                                                                                                                                                                                                                                                                                                                                                                                                                                                        |                                                                                                                                                                                                                                                                     | scaffold_3_mRNA_2119.1          | -                            | -                               |
| GF0028045 | 1                            | 0                         | 0                            | 0 Hypothetical protein (1)                                     |                                                                                                                                                                                                                                                                                                                                                                                                                                                        |                                                                                                                                                                                                                                                                     | scaffold_3_mRNA_2117.1          | -                            | -                               |
| GF0028044 | 1                            | 0                         | 0                            | 0 Hypothetical protein (1)                                     |                                                                                                                                                                                                                                                                                                                                                                                                                                                        |                                                                                                                                                                                                                                                                     | scaffold_3_mRNA_2115.1          | -                            | -                               |
| GF0028043 | 1                            | 0                         | 0                            | 0 Hypothetical protein (1)                                     |                                                                                                                                                                                                                                                                                                                                                                                                                                                        |                                                                                                                                                                                                                                                                     | scaffold_3_mRNA_2108.1          | -                            | -                               |
| GF0028042 | 1                            | 0                         | 0                            | 0 Hypothetical protein (1)                                     |                                                                                                                                                                                                                                                                                                                                                                                                                                                        | Retrotransposon gag domain [IPR005162] (1)                                                                                                                                                                                                                          | scaffold_3_mRNA_2105.1          | -                            | -                               |
| GF0028041 | 1                            | 0                         | 0                            | 0 Hypothetical protein (1)                                     |                                                                                                                                                                                                                                                                                                                                                                                                                                                        |                                                                                                                                                                                                                                                                     | scaffold_3_mRNA_2104.1          | -                            | -                               |
| GF0028040 | 1                            | 0                         | 0                            | 0 Hypothetical protein (1)                                     |                                                                                                                                                                                                                                                                                                                                                                                                                                                        |                                                                                                                                                                                                                                                                     | scaffold_3_mRNA_2103.1          | -                            | -                               |
| GF0028039 | 1                            | 0                         | 0                            | 0 Hypothetical protein (1)                                     |                                                                                                                                                                                                                                                                                                                                                                                                                                                        |                                                                                                                                                                                                                                                                     | scaffold_3_mRNA_2101.1          | -                            | -                               |
| GF0028038 | 1                            | 0                         | 0                            | 0 Hypothetical protein (1)                                     |                                                                                                                                                                                                                                                                                                                                                                                                                                                        |                                                                                                                                                                                                                                                                     | scaffold_3_mRNA_2100.1          | -                            | -                               |
| GF0028037 | 1                            | 0                         | 0                            | 0 Hypothetical protein (1)                                     |                                                                                                                                                                                                                                                                                                                                                                                                                                                        |                                                                                                                                                                                                                                                                     | scaffold_3_mRNA_21.1            | -                            | -                               |



| ID        | Num. in <i>C. clematitae</i> | Num. in <i>C. uchuha</i> | Num. in <i>P. trifoliata</i> | Note                                                          | GO                                                                                                                                                                                                                                        | InterPro                                                                                                                                                                                                                                                                             | Members in <i>C. clematitae</i> | Members in <i>C. uchuha</i> | Members in <i>P. trifoliata</i> |
|-----------|------------------------------|--------------------------|------------------------------|---------------------------------------------------------------|-------------------------------------------------------------------------------------------------------------------------------------------------------------------------------------------------------------------------------------------|--------------------------------------------------------------------------------------------------------------------------------------------------------------------------------------------------------------------------------------------------------------------------------------|---------------------------------|-----------------------------|---------------------------------|
| GF0028036 | 1                            | 0                        | 0                            | Putative smuDR family transposase-like (1)                    | zinc ion binding [GO:0008270 molecular_function] (1); nucleic acid binding [GO:0003676 molecular_function] (1)                                                                                                                            | Zinc finger, CCHC-type [IPR001878] (1); MULE transposase domain [IPR018299] (1); Zinc finger, PMZ-type [IPR006564] (1); Zinc finger, SWIM-type [IPR007527] (1)                                                                                                                       | scaffold_3_mRNA_2096.1          | -                           | -                               |
| GF0028035 | 1                            | 0                        | 0                            | Hypothetical protein (1)                                      | cytosine-type peptidase activity [GO:000234 molecular_function] (1); proteolysis [GO:0006508 biological_process] (1)                                                                                                                      | Ulp1 protease family, C-terminal catalytic domain [IPR003653] (1)                                                                                                                                                                                                                    | scaffold_3_mRNA_2095.1          | -                           | -                               |
| GF0028034 | 1                            | 0                        | 0                            | Hypothetical protein (1)                                      | nucleic acid binding [GO:0003676 molecular_function] (1); signal transduction [GO:0007165 biological_process] (1); zinc ion binding [GO:0008270 molecular_function] (1); protein binding [GO:0005515 molecular_function] (1)              | Toll/interleukin-1 receptor homology (TIR) domain [IPR000157] (1); Zinc finger, CCHC-type [IPR001878] (1)                                                                                                                                                                            | scaffold_3_mRNA_2087.1          | -                           | -                               |
| GF0028033 | 1                            | 0                        | 0                            | Hypothetical protein (1)                                      |                                                                                                                                                                                                                                           |                                                                                                                                                                                                                                                                                      | scaffold_3_mRNA_2084.1          | -                           | -                               |
| GF0028032 | 1                            | 0                        | 0                            | Hypothetical protein (1)                                      |                                                                                                                                                                                                                                           |                                                                                                                                                                                                                                                                                      | scaffold_3_mRNA_2083.1          | -                           | -                               |
| GF0028031 | 1                            | 0                        | 0                            | Hypothetical protein (1)                                      | ATPase activity [GO:0016887 molecular_function] (1); ATP binding [GO:0005524 molecular_function] (1)                                                                                                                                      | Plant PDR ABC transporter associated [IPR013581] (1); P-loop containing nucleoside triphosphate hydrolase [IPR027417] (1); AAA+ ATPase domain [IPR03593] (1); ATP-binding cassette transporter, PDR-like subfamily G, domain 2 [IPR034003] (1); ABC transporter-like [IPR003439] (1) | scaffold_3_mRNA_2081.1          | -                           | -                               |
| GF0028030 | 1                            | 0                        | 0                            | Hypothetical protein (1)                                      |                                                                                                                                                                                                                                           |                                                                                                                                                                                                                                                                                      | scaffold_3_mRNA_2080.1          | -                           | -                               |
| GF0028029 | 1                            | 0                        | 0                            | Hypothetical protein (1)                                      |                                                                                                                                                                                                                                           |                                                                                                                                                                                                                                                                                      | scaffold_3_mRNA_2075.1          | -                           | -                               |
| GF0028028 | 1                            | 0                        | 0                            | Cytokinin riboside 5'-monophosphate phosphoribohydrolase (1)  |                                                                                                                                                                                                                                           | LOG family [IPR031100] (1)                                                                                                                                                                                                                                                           | scaffold_3_mRNA_2074.1          | -                           | -                               |
| GF0028027 | 1                            | 0                        | 0                            | Hypothetical protein (1)                                      |                                                                                                                                                                                                                                           |                                                                                                                                                                                                                                                                                      | scaffold_3_mRNA_2070.1          | -                           | -                               |
| GF0028026 | 1                            | 0                        | 0                            | Hypothetical protein (1)                                      |                                                                                                                                                                                                                                           | Aspartic peptidase domain [IPR021109] (1)                                                                                                                                                                                                                                            | scaffold_3_mRNA_2069.1          | -                           | -                               |
| GF0028025 | 1                            | 0                        | 0                            | Hypothetical protein (1)                                      |                                                                                                                                                                                                                                           |                                                                                                                                                                                                                                                                                      | scaffold_3_mRNA_2067.1          | -                           | -                               |
| GF0028024 | 1                            | 0                        | 0                            | Hypothetical protein (1)                                      |                                                                                                                                                                                                                                           |                                                                                                                                                                                                                                                                                      | scaffold_3_mRNA_2064.1          | -                           | -                               |
| GF0028023 | 1                            | 0                        | 0                            | Hypothetical protein (1)                                      |                                                                                                                                                                                                                                           |                                                                                                                                                                                                                                                                                      | scaffold_3_mRNA_2062.1          | -                           | -                               |
| GF0028022 | 1                            | 0                        | 0                            | Hypothetical protein (1)                                      |                                                                                                                                                                                                                                           | Probable transposase, PtnA/En/Spm, plant [IPR04252] (1)                                                                                                                                                                                                                              | scaffold_3_mRNA_2061.1          | -                           | -                               |
| GF0028021 | 1                            | 0                        | 0                            | Hypothetical protein (1)                                      |                                                                                                                                                                                                                                           |                                                                                                                                                                                                                                                                                      | scaffold_3_mRNA_2055.1          | -                           | -                               |
| GF0028020 | 1                            | 0                        | 0                            | Hypothetical protein (1)                                      |                                                                                                                                                                                                                                           | LOG family [IPR031100] (1)                                                                                                                                                                                                                                                           | scaffold_3_mRNA_2046.1          | -                           | -                               |
| GF0028019 | 1                            | 0                        | 0                            | Hypothetical protein (1)                                      |                                                                                                                                                                                                                                           |                                                                                                                                                                                                                                                                                      | scaffold_3_mRNA_2045.1          | -                           | -                               |
| GF0028018 | 1                            | 0                        | 0                            | Hypothetical protein (1)                                      |                                                                                                                                                                                                                                           |                                                                                                                                                                                                                                                                                      | scaffold_3_mRNA_2041.1          | -                           | -                               |
| GF0028017 | 1                            | 0                        | 0                            | Triose-phosphate isomerase (1)                                | metabolic process [GO:0008152 biological_process] (1); catalytic activity [GO:0003824 molecular_function] (1); triose-phosphate isomerase activity [GO:0004807 molecular_function] (1)                                                    | Triosephosphate isomerase [IPR000652] (1); Aldolase-type TIM barrel [IPR013785] (1)                                                                                                                                                                                                  | scaffold_3_mRNA_2037.1          | -                           | -                               |
| GF0028016 | 1                            | 0                        | 0                            | Hypothetical protein (1)                                      |                                                                                                                                                                                                                                           |                                                                                                                                                                                                                                                                                      | scaffold_3_mRNA_2033.1          | -                           | -                               |
| GF0028015 | 1                            | 0                        | 0                            | Hypothetical protein (1)                                      |                                                                                                                                                                                                                                           |                                                                                                                                                                                                                                                                                      | scaffold_3_mRNA_2032.1          | -                           | -                               |
| GF0028014 | 1                            | 0                        | 0                            | Hypothetical protein (1)                                      |                                                                                                                                                                                                                                           |                                                                                                                                                                                                                                                                                      | scaffold_3_mRNA_2026.1          | -                           | -                               |
| GF0028013 | 1                            | 0                        | 0                            | Hypothetical protein (1)                                      |                                                                                                                                                                                                                                           |                                                                                                                                                                                                                                                                                      | scaffold_3_mRNA_2025.1          | -                           | -                               |
| GF0028012 | 1                            | 0                        | 0                            | Hypothetical protein (1)                                      |                                                                                                                                                                                                                                           |                                                                                                                                                                                                                                                                                      | scaffold_3_mRNA_2024.1          | -                           | -                               |
| GF0028011 | 1                            | 0                        | 0                            | BED zinc finger, HAT family dimerization domain isoform 1 (1) | DNA binding [GO:0003677 molecular_function] (1); nucleic acid binding [GO:0003676 molecular_function] (1); protein dimerization activity [GO:0046983 molecular_function] (1)                                                              | hAT-like transposase, RNase-H fold [IPR02525] (1); Ribonuclease H-like domain [IPR012337] (1); HAT, C-terminal dimerization domain [IPR008906] (1)                                                                                                                                   | scaffold_3_mRNA_2023.1          | -                           | -                               |
| GF0028010 | 1                            | 0                        | 0                            | Hypothetical protein (1)                                      |                                                                                                                                                                                                                                           |                                                                                                                                                                                                                                                                                      | scaffold_3_mRNA_2020.1          | -                           | -                               |
| GF0028009 | 1                            | 0                        | 0                            | Hypothetical protein (1)                                      |                                                                                                                                                                                                                                           |                                                                                                                                                                                                                                                                                      | scaffold_3_mRNA_2017.1          | -                           | -                               |
| GF0028008 | 1                            | 0                        | 0                            | Hypothetical protein (1)                                      |                                                                                                                                                                                                                                           |                                                                                                                                                                                                                                                                                      | scaffold_3_mRNA_2016.1          | -                           | -                               |
| GF0028007 | 1                            | 0                        | 0                            | Hypothetical protein (1)                                      |                                                                                                                                                                                                                                           |                                                                                                                                                                                                                                                                                      | scaffold_3_mRNA_2015.1          | -                           | -                               |
| GF0028006 | 1                            | 0                        | 0                            | Hypothetical protein (1)                                      |                                                                                                                                                                                                                                           |                                                                                                                                                                                                                                                                                      | scaffold_3_mRNA_2012.1          | -                           | -                               |
| GF0028005 | 1                            | 0                        | 0                            | Hypothetical protein (1)                                      |                                                                                                                                                                                                                                           |                                                                                                                                                                                                                                                                                      | scaffold_3_mRNA_2011.1          | -                           | -                               |
| GF0028004 | 1                            | 0                        | 0                            | Hypothetical protein (1)                                      |                                                                                                                                                                                                                                           |                                                                                                                                                                                                                                                                                      | scaffold_3_mRNA_2005.1          | -                           | -                               |
| GF0028003 | 1                            | 0                        | 0                            | Hypothetical protein (1)                                      | nucleic acid binding [GO:0003676 molecular_function] (1); zinc ion binding [GO:0008270 molecular_function] (1)                                                                                                                            | Zinc finger, CCHC-type [IPR001878] (1)                                                                                                                                                                                                                                               | scaffold_3_mRNA_2003.1          | -                           | -                               |
| GF0028002 | 1                            | 0                        | 0                            | Hypothetical protein (1)                                      |                                                                                                                                                                                                                                           |                                                                                                                                                                                                                                                                                      | scaffold_3_mRNA_1999.1          | -                           | -                               |
| GF0028001 | 1                            | 0                        | 0                            | Hypothetical protein (1)                                      |                                                                                                                                                                                                                                           |                                                                                                                                                                                                                                                                                      | scaffold_3_mRNA_1998.1          | -                           | -                               |
| GF0028000 | 1                            | 0                        | 0                            | Hypothetical protein (1)                                      |                                                                                                                                                                                                                                           |                                                                                                                                                                                                                                                                                      | scaffold_3_mRNA_1997.1          | -                           | -                               |
| GF0027999 | 1                            | 0                        | 0                            | Retrotransposon protein, putative, Ty3-gypsy subclass (1)     |                                                                                                                                                                                                                                           | Aspartic peptidase domain [IPR021109] (1)                                                                                                                                                                                                                                            | scaffold_3_mRNA_1995.1          | -                           | -                               |
| GF0027998 | 1                            | 0                        | 0                            | Hypothetical protein (1)                                      |                                                                                                                                                                                                                                           |                                                                                                                                                                                                                                                                                      | scaffold_3_mRNA_1994.1          | -                           | -                               |
| GF0027997 | 1                            | 0                        | 0                            | Hypothetical protein (1)                                      |                                                                                                                                                                                                                                           |                                                                                                                                                                                                                                                                                      | scaffold_3_mRNA_1993.1          | -                           | -                               |
| GF0027996 | 1                            | 0                        | 0                            | Hypothetical protein (1)                                      | zinc ion binding [GO:0008270 molecular_function] (1); nucleic acid binding [GO:0003676 molecular_function] (1)                                                                                                                            | Zinc finger, CCHC-type [IPR001878] (1)                                                                                                                                                                                                                                               | scaffold_3_mRNA_1989.1          | -                           | -                               |
| GF0027995 | 1                            | 0                        | 0                            | Hypothetical protein (1)                                      |                                                                                                                                                                                                                                           |                                                                                                                                                                                                                                                                                      | scaffold_3_mRNA_1988.1          | -                           | -                               |
| GF0027994 | 1                            | 0                        | 0                            | Hypothetical protein (1)                                      |                                                                                                                                                                                                                                           |                                                                                                                                                                                                                                                                                      | scaffold_3_mRNA_1987.1          | -                           | -                               |
| GF0027993 | 1                            | 0                        | 0                            | Hypothetical protein (1)                                      | aspartic-type endopeptidase activity [GO:0004190 molecular_function] (1); zinc ion binding [GO:0008270 molecular_function] (1); proteolysis [GO:0006508 biological_process] (1); nucleic acid binding [GO:0003676 molecular_function] (1) | Zinc finger, CCHC-type [IPR001878] (1); Poptidase A2A, retrovirus, catalytic [IPR001995] (1)                                                                                                                                                                                         | scaffold_3_mRNA_1985.1          | -                           | -                               |
| GF0027992 | 1                            | 0                        | 0                            | Hypothetical protein (1)                                      |                                                                                                                                                                                                                                           |                                                                                                                                                                                                                                                                                      | scaffold_3_mRNA_1984.1          | -                           | -                               |
| GF0027991 | 1                            | 0                        | 0                            | Hypothetical protein (1)                                      |                                                                                                                                                                                                                                           |                                                                                                                                                                                                                                                                                      | scaffold_3_mRNA_1983.1          | -                           | -                               |
| GF0027990 | 1                            | 0                        | 0                            | Hypothetical protein (1)                                      |                                                                                                                                                                                                                                           |                                                                                                                                                                                                                                                                                      | scaffold_3_mRNA_1976.1          | -                           | -                               |
| GF0027989 | 1                            | 0                        | 0                            | Hypothetical protein (1)                                      |                                                                                                                                                                                                                                           |                                                                                                                                                                                                                                                                                      | scaffold_3_mRNA_1975.1          | -                           | -                               |
| GF0027988 | 1                            | 0                        | 0                            | Hypothetical protein (1)                                      |                                                                                                                                                                                                                                           |                                                                                                                                                                                                                                                                                      | scaffold_3_mRNA_1974.1          | -                           | -                               |
| GF0027987 | 1                            | 0                        | 0                            | Hypothetical protein (1)                                      |                                                                                                                                                                                                                                           |                                                                                                                                                                                                                                                                                      | scaffold_3_mRNA_1973.1          | -                           | -                               |
| GF0027986 | 1                            | 0                        | 0                            | Hypothetical protein (1)                                      |                                                                                                                                                                                                                                           |                                                                                                                                                                                                                                                                                      | scaffold_3_mRNA_1972.1          | -                           | -                               |
| GF0027985 | 1                            | 0                        | 0                            | Hypothetical protein (1)                                      |                                                                                                                                                                                                                                           |                                                                                                                                                                                                                                                                                      | scaffold_3_mRNA_1970.1          | -                           | -                               |
| GF0027984 | 1                            | 0                        | 0                            | Hypothetical protein (1)                                      |                                                                                                                                                                                                                                           |                                                                                                                                                                                                                                                                                      | scaffold_3_mRNA_1969.1          | -                           | -                               |
| GF0027983 | 1                            | 0                        | 0                            | cDNA clone 002-112-E03, full insert sequence (1)              |                                                                                                                                                                                                                                           | Reverse transcriptase domain [IPR000477] (1)                                                                                                                                                                                                                                         | scaffold_3_mRNA_1968.1          | -                           | -                               |
| GF0027982 | 1                            | 0                        | 0                            | Hypothetical protein (1)                                      |                                                                                                                                                                                                                                           |                                                                                                                                                                                                                                                                                      | scaffold_3_mRNA_1967.1          | -                           | -                               |
| GF0027981 | 1                            | 0                        | 0                            | Cytokinin riboside 5'-monophosphate phosphoribohydrolase (1)  |                                                                                                                                                                                                                                           | Cytokinin riboside 5'-monophosphate phosphoribohydrolase LOG [IPR005269] (1); LOG family [IPR031100] (1)                                                                                                                                                                             | scaffold_3_mRNA_1966.1          | -                           | -                               |
| GF0027980 | 1                            | 0                        | 0                            | Hypothetical protein (1)                                      |                                                                                                                                                                                                                                           |                                                                                                                                                                                                                                                                                      | scaffold_3_mRNA_1965.1          | -                           | -                               |
| GF0027979 | 1                            | 0                        | 0                            | Hypothetical protein (1)                                      |                                                                                                                                                                                                                                           |                                                                                                                                                                                                                                                                                      | scaffold_3_mRNA_1956.1          | -                           | -                               |
| GF0027978 | 1                            | 0                        | 0                            | Hypothetical protein (1)                                      |                                                                                                                                                                                                                                           |                                                                                                                                                                                                                                                                                      | scaffold_3_mRNA_1952.1          | -                           | -                               |
| GF0027977 | 1                            | 0                        | 0                            | Hypothetical protein (1)                                      |                                                                                                                                                                                                                                           |                                                                                                                                                                                                                                                                                      | scaffold_3_mRNA_1948.1          | -                           | -                               |
| GF0027976 | 1                            | 0                        | 0                            | Hypothetical protein (1)                                      | zinc ion binding [GO:0008270 molecular_function] (1); nucleic acid binding [GO:0003676 molecular_function] (1)                                                                                                                            | Zinc finger, CCHC-type [IPR001878] (1)                                                                                                                                                                                                                                               | scaffold_3_mRNA_1947.1          | -                           | -                               |
| GF0027975 | 1                            | 0                        | 0                            | Hypothetical protein (1)                                      |                                                                                                                                                                                                                                           | Viral movement protein [IPR028919] (1)                                                                                                                                                                                                                                               | scaffold_3_mRNA_1946.1          | -                           | -                               |
| GF0027974 | 1                            | 0                        | 0                            | Hypothetical protein (1)                                      | nucleic acid binding [GO:0003676 molecular_function] (1); regulation of transcription, DNA-templated [GO:0006355 biological_process] (1)                                                                                                  | Carlavirus nucleic acid-binding protein [IPR02568] (1)                                                                                                                                                                                                                               | scaffold_3_mRNA_1945.1          | -                           | -                               |
| GF0027973 | 1                            | 0                        | 0                            | Hypothetical protein (1)                                      |                                                                                                                                                                                                                                           |                                                                                                                                                                                                                                                                                      | scaffold_3_mRNA_1944.1          | -                           | -                               |
| GF0027972 | 1                            | 0                        | 0                            | Hypothetical protein (1)                                      |                                                                                                                                                                                                                                           |                                                                                                                                                                                                                                                                                      | scaffold_3_mRNA_1943.1          | -                           | -                               |
| GF0027971 | 1                            | 0                        | 0                            | Hypothetical protein (1)                                      |                                                                                                                                                                                                                                           |                                                                                                                                                                                                                                                                                      | scaffold_3_mRNA_1941.1          | -                           | -                               |
| GF0027970 | 1                            | 0                        | 0                            | Hypothetical protein (1)                                      |                                                                                                                                                                                                                                           |                                                                                                                                                                                                                                                                                      | scaffold_3_mRNA_1939.1          | -                           | -                               |
| GF0027969 | 1                            | 0                        | 0                            | Hypothetical protein (1)                                      |                                                                                                                                                                                                                                           |                                                                                                                                                                                                                                                                                      | scaffold_3_mRNA_1937.1          | -                           | -                               |
| GF0027968 | 1                            | 0                        | 0                            | Hypothetical protein (1)                                      |                                                                                                                                                                                                                                           |                                                                                                                                                                                                                                                                                      | scaffold_3_mRNA_1936.1          | -                           | -                               |
| GF0027967 | 1                            | 0                        | 0                            | Hypothetical protein (1)                                      |                                                                                                                                                                                                                                           |                                                                                                                                                                                                                                                                                      | scaffold_3_mRNA_1935.1          | -                           | -                               |
| GF0027966 | 1                            | 0                        | 0                            | Hypothetical protein (1)                                      |                                                                                                                                                                                                                                           | Reverse transcriptase domain [IPR000477] (1)                                                                                                                                                                                                                                         | scaffold_3_mRNA_1934.1          | -                           | -                               |
| GF0027965 | 1                            | 0                        | 0                            | Hypothetical protein (1)                                      |                                                                                                                                                                                                                                           | Viral movement protein [IPR028919] (1)                                                                                                                                                                                                                                               | scaffold_3_mRNA_1933.1          | -                           | -                               |
| GF0027964 | 1                            | 0                        | 0                            | Hypothetical protein (1)                                      |                                                                                                                                                                                                                                           |                                                                                                                                                                                                                                                                                      | scaffold_3_mRNA_1931.1          | -                           | -                               |
| GF0027963 | 1                            | 0                        | 0                            | Hypothetical protein (1)                                      |                                                                                                                                                                                                                                           | Reverse transcriptase domain [IPR000477] (1)                                                                                                                                                                                                                                         | scaffold_3_mRNA_1930.1          | -                           | -                               |
| GF0027962 | 1                            | 0                        | 0                            | Hypothetical protein (1)                                      |                                                                                                                                                                                                                                           |                                                                                                                                                                                                                                                                                      | scaffold_3_mRNA_1929.1          | -                           | -                               |
| GF0027961 | 1                            | 0                        | 0                            | Hypothetical protein (1)                                      |                                                                                                                                                                                                                                           |                                                                                                                                                                                                                                                                                      | scaffold_3_mRNA_1928.1          | -                           | -                               |
| GF0027960 | 1                            | 0                        | 0                            | Hypothetical protein (1)                                      |                                                                                                                                                                                                                                           |                                                                                                                                                                                                                                                                                      | scaffold_3_mRNA_1925.1          | -                           | -                               |
| GF0027959 | 1                            | 0                        | 0                            | Hypothetical protein (1)                                      |                                                                                                                                                                                                                                           |                                                                                                                                                                                                                                                                                      | scaffold_3_mRNA_1922.1          | -                           | -                               |
| GF0027958 | 1                            | 0                        | 0                            | Hypothetical protein (1)                                      |                                                                                                                                                                                                                                           |                                                                                                                                                                                                                                                                                      | scaffold_3_mRNA_1920.1          | -                           | -                               |
| GF0027957 | 1                            | 0                        | 0                            | Hypothetical protein (1)                                      |                                                                                                                                                                                                                                           |                                                                                                                                                                                                                                                                                      | scaffold_3_mRNA_1917.1          | -                           | -                               |
| GF0027956 | 1                            | 0                        | 0                            | Hypothetical protein (1)                                      |                                                                                                                                                                                                                                           |                                                                                                                                                                                                                                                                                      | scaffold_3_mRNA_1913.1          | -                           | -                               |

| ID        | Num. in <i>C. clementiae</i> | Num in <i>C. uchiha</i> | Num in <i>P. trifoliata</i> | Note                                                              | GO                                                                                                                                                                                                                                                                                         | InterPro                                                                                                                                                                                                     | Members in <i>C. clementiae</i> | Members in <i>C. uchiha</i> | Members in <i>P. trifoliata</i> |
|-----------|------------------------------|-------------------------|-----------------------------|-------------------------------------------------------------------|--------------------------------------------------------------------------------------------------------------------------------------------------------------------------------------------------------------------------------------------------------------------------------------------|--------------------------------------------------------------------------------------------------------------------------------------------------------------------------------------------------------------|---------------------------------|-----------------------------|---------------------------------|
| GF0027955 | 1                            | 0                       | 0                           | 0 Hypothetical protein (1)                                        |                                                                                                                                                                                                                                                                                            |                                                                                                                                                                                                              | scaffold_3_mRNA_1912.1          | -                           | -                               |
| GF0027954 | 1                            | 0                       | 0                           | 0 Hypothetical protein (1)                                        |                                                                                                                                                                                                                                                                                            |                                                                                                                                                                                                              | scaffold_3_mRNA_1911.1          | -                           | -                               |
| GF0027953 | 1                            | 0                       | 0                           | 0 Hypothetical protein (1)                                        |                                                                                                                                                                                                                                                                                            |                                                                                                                                                                                                              | scaffold_3_mRNA_1904.1          | -                           | -                               |
| GF0027952 | 1                            | 0                       | 0                           | 0 Hypothetical protein (1)                                        |                                                                                                                                                                                                                                                                                            | Retrotransposon gag domain [IPR005162] (1)                                                                                                                                                                   | scaffold_3_mRNA_1901.1          | -                           | -                               |
| GF0027951 | 1                            | 0                       | 0                           | 0 Cation/H <sup>+</sup> antiporter 15 (1)                         | cation transport [GO:0006812 biological_process] (1); integral component of membrane [GO:0016021 cellular_component] (1); transmembrane transport [GO:0055085 biological_process] (1); solute proton antiporter activity [GO:0015299 molecular_function] (1)                               | Cation/H <sup>+</sup> exchanger [IPR006153] (1); Rossmann-like alpha/beta/alpha sandwich fold [IPR014729] (1)                                                                                                | scaffold_3_mRNA_190.1           | -                           | -                               |
| GF0027950 | 1                            | 0                       | 0                           | 0 Hypothetical protein (1)                                        |                                                                                                                                                                                                                                                                                            |                                                                                                                                                                                                              | scaffold_3_mRNA_19.1            | -                           | -                               |
| GF0027949 | 1                            | 0                       | 0                           | 0 Hypothetical protein (1)                                        |                                                                                                                                                                                                                                                                                            |                                                                                                                                                                                                              | scaffold_3_mRNA_1895.1          | -                           | -                               |
| GF0027948 | 1                            | 0                       | 0                           | 0 Hypothetical protein (1)                                        |                                                                                                                                                                                                                                                                                            |                                                                                                                                                                                                              | scaffold_3_mRNA_1892.1          | -                           | -                               |
| GF0027947 | 1                            | 0                       | 0                           | 0 Hypothetical protein (1)                                        |                                                                                                                                                                                                                                                                                            |                                                                                                                                                                                                              | scaffold_3_mRNA_1891.1          | -                           | -                               |
| GF0027946 | 1                            | 0                       | 0                           | 0 Hypothetical protein (1)                                        |                                                                                                                                                                                                                                                                                            |                                                                                                                                                                                                              | scaffold_3_mRNA_1885.1          | -                           | -                               |
| GF0027945 | 1                            | 0                       | 0                           | 0 Hypothetical protein (1)                                        |                                                                                                                                                                                                                                                                                            |                                                                                                                                                                                                              | scaffold_3_mRNA_1884.1          | -                           | -                               |
| GF0027944 | 1                            | 0                       | 0                           | 0 Hypothetical protein (1)                                        |                                                                                                                                                                                                                                                                                            |                                                                                                                                                                                                              | scaffold_3_mRNA_1883.1          | -                           | -                               |
| GF0027943 | 1                            | 0                       | 0                           | 0 Hypothetical protein (1)                                        |                                                                                                                                                                                                                                                                                            |                                                                                                                                                                                                              | scaffold_3_mRNA_1880.1          | -                           | -                               |
| GF0027942 | 1                            | 0                       | 0                           | 0 Hypothetical protein (1)                                        |                                                                                                                                                                                                                                                                                            |                                                                                                                                                                                                              | scaffold_3_mRNA_1877.1          | -                           | -                               |
| GF0027941 | 1                            | 0                       | 0                           | 0 Hypothetical protein (1)                                        |                                                                                                                                                                                                                                                                                            |                                                                                                                                                                                                              | scaffold_3_mRNA_1875.1          | -                           | -                               |
| GF0027940 | 1                            | 0                       | 0                           | 0 Hypothetical protein (1)                                        |                                                                                                                                                                                                                                                                                            |                                                                                                                                                                                                              | scaffold_3_mRNA_1873.1          | -                           | -                               |
| GF0027939 | 1                            | 0                       | 0                           | 0 Hypothetical protein (1)                                        |                                                                                                                                                                                                                                                                                            |                                                                                                                                                                                                              | scaffold_3_mRNA_1871.1          | -                           | -                               |
| GF0027938 | 1                            | 0                       | 0                           | 0 Hypothetical protein (1)                                        |                                                                                                                                                                                                                                                                                            | Viral movement protein [IPR028919] (1)                                                                                                                                                                       | scaffold_3_mRNA_1867.1          | -                           | -                               |
| GF0027937 | 1                            | 0                       | 0                           | 0 Hypothetical protein (1)                                        |                                                                                                                                                                                                                                                                                            |                                                                                                                                                                                                              | scaffold_3_mRNA_1866.1          | -                           | -                               |
| GF0027936 | 1                            | 0                       | 0                           | 0 Hypothetical protein (1)                                        |                                                                                                                                                                                                                                                                                            |                                                                                                                                                                                                              | scaffold_3_mRNA_1864.1          | -                           | -                               |
| GF0027935 | 1                            | 0                       | 0                           | 0 Hypothetical protein (1)                                        |                                                                                                                                                                                                                                                                                            | Reverse transcriptase domain [IPR000477] (1)                                                                                                                                                                 | scaffold_3_mRNA_1862.1          | -                           | -                               |
| GF0027934 | 1                            | 0                       | 0                           | 0 Hypothetical protein (1)                                        |                                                                                                                                                                                                                                                                                            |                                                                                                                                                                                                              | scaffold_3_mRNA_1858.1          | -                           | -                               |
| GF0027933 | 1                            | 0                       | 0                           | 0 Hypothetical protein (1)                                        |                                                                                                                                                                                                                                                                                            |                                                                                                                                                                                                              | scaffold_3_mRNA_1857.1          | -                           | -                               |
| GF0027932 | 1                            | 0                       | 0                           | 0 Hypothetical protein (1)                                        |                                                                                                                                                                                                                                                                                            |                                                                                                                                                                                                              | scaffold_3_mRNA_1856.1          | -                           | -                               |
| GF0027931 | 1                            | 0                       | 0                           | 0 Hypothetical protein (1)                                        |                                                                                                                                                                                                                                                                                            | Viral movement protein [IPR028919] (1)                                                                                                                                                                       | scaffold_3_mRNA_1855.1          | -                           | -                               |
| GF0027930 | 1                            | 0                       | 0                           | 0 Hypothetical protein (1)                                        |                                                                                                                                                                                                                                                                                            |                                                                                                                                                                                                              | scaffold_3_mRNA_1854.1          | -                           | -                               |
| GF0027929 | 1                            | 0                       | 0                           | 0 Hypothetical protein (1)                                        |                                                                                                                                                                                                                                                                                            |                                                                                                                                                                                                              | scaffold_3_mRNA_1853.1          | -                           | -                               |
| GF0027928 | 1                            | 0                       | 0                           | 0 Hypothetical protein (1)                                        |                                                                                                                                                                                                                                                                                            |                                                                                                                                                                                                              | scaffold_3_mRNA_1850.1          | -                           | -                               |
| GF0027927 | 1                            | 0                       | 0                           | 0 Hypothetical protein (1)                                        |                                                                                                                                                                                                                                                                                            |                                                                                                                                                                                                              | scaffold_3_mRNA_1849.1          | -                           | -                               |
| GF0027926 | 1                            | 0                       | 0                           | 0 Hypothetical protein (1)                                        |                                                                                                                                                                                                                                                                                            |                                                                                                                                                                                                              | scaffold_3_mRNA_1846.1          | -                           | -                               |
| GF0027925 | 1                            | 0                       | 0                           | 0 Hypothetical protein (1)                                        |                                                                                                                                                                                                                                                                                            | Reverse transcriptase domain [IPR000477] (1)                                                                                                                                                                 | scaffold_3_mRNA_1843.1          | -                           | -                               |
| GF0027924 | 1                            | 0                       | 0                           | 0 Hypothetical protein (1)                                        |                                                                                                                                                                                                                                                                                            |                                                                                                                                                                                                              | scaffold_3_mRNA_1840.1          | -                           | -                               |
| GF0027923 | 1                            | 0                       | 0                           | 0 Hypothetical protein (1)                                        |                                                                                                                                                                                                                                                                                            | Aspartic peptidase domain [IPR021109] (1); Viral movement protein [IPR028919] (1)                                                                                                                            | scaffold_3_mRNA_1838.1          | -                           | -                               |
| GF0027922 | 1                            | 0                       | 0                           | 0 Hypothetical protein (1)                                        |                                                                                                                                                                                                                                                                                            |                                                                                                                                                                                                              | scaffold_3_mRNA_1837.1          | -                           | -                               |
| GF0027921 | 1                            | 0                       | 0                           | 0 Hypothetical protein (1)                                        | zinc ion binding [GO:0008270 molecular_function] (1); nucleic acid binding [GO:0003676 molecular_function] (1)                                                                                                                                                                             | Zinc finger, CCHC-type [IPR001878] (1); Aspartic peptidase domain [IPR021109] (1); Retropepsins [IPR018061] (1)                                                                                              | scaffold_3_mRNA_1836.1          | -                           | -                               |
| GF0027920 | 1                            | 0                       | 0                           | 0 Hypothetical protein (1)                                        |                                                                                                                                                                                                                                                                                            |                                                                                                                                                                                                              | scaffold_3_mRNA_1835.1          | -                           | -                               |
| GF0027919 | 1                            | 0                       | 0                           | 0 Hypothetical protein (1)                                        | zinc ion binding [GO:0008270 molecular_function] (1); aspartic-type endopeptidase activity [GO:0004190 molecular_function] (1); nucleic acid binding [GO:0003676 molecular_function] (1); DNA binding [GO:0003677 molecular_function] (1); proteolysis [GO:0006508 biological_process] (1) | Zinc finger, CCHC-type [IPR001878] (1); Aspartic peptidase domain [IPR021109] (1); Peptidase A2A, retrovirus, catalytic [IPR001995] (1); Zinc finger, BED-type [IPR003550] (1); Retropepsins [IPR018061] (1) | scaffold_3_mRNA_1833.1          | -                           | -                               |
| GF0027918 | 1                            | 0                       | 0                           | 0 Hypothetical protein (1)                                        |                                                                                                                                                                                                                                                                                            |                                                                                                                                                                                                              | scaffold_3_mRNA_1831.1          | -                           | -                               |
| GF0027917 | 1                            | 0                       | 0                           | 0 Hypothetical protein (1)                                        |                                                                                                                                                                                                                                                                                            |                                                                                                                                                                                                              | scaffold_3_mRNA_1830.1          | -                           | -                               |
| GF0027916 | 1                            | 0                       | 0                           | 0 Hypothetical protein (1)                                        |                                                                                                                                                                                                                                                                                            |                                                                                                                                                                                                              | scaffold_3_mRNA_1825.1          | -                           | -                               |
| GF0027915 | 1                            | 0                       | 0                           | 0 Hypothetical protein (1)                                        |                                                                                                                                                                                                                                                                                            | Viral movement protein [IPR028919] (1)                                                                                                                                                                       | scaffold_3_mRNA_1824.1          | -                           | -                               |
| GF0027914 | 1                            | 0                       | 0                           | 0 Hypothetical protein (1)                                        |                                                                                                                                                                                                                                                                                            |                                                                                                                                                                                                              | scaffold_3_mRNA_1823.1          | -                           | -                               |
| GF0027913 | 1                            | 0                       | 0                           | 0 Hypothetical protein (1)                                        |                                                                                                                                                                                                                                                                                            |                                                                                                                                                                                                              | scaffold_3_mRNA_1820.1          | -                           | -                               |
| GF0027912 | 1                            | 0                       | 0                           | 0 Hypothetical protein (1)                                        |                                                                                                                                                                                                                                                                                            |                                                                                                                                                                                                              | scaffold_3_mRNA_1813.1          | -                           | -                               |
| GF0027911 | 1                            | 0                       | 0                           | 0 Hypothetical protein (1)                                        | zinc ion binding [GO:0008270 molecular_function] (1); nucleic acid binding [GO:0003676 molecular_function] (1)                                                                                                                                                                             | Zinc finger, CCHC-type [IPR001878] (1)                                                                                                                                                                       | scaffold_3_mRNA_1811.1          | -                           | -                               |
| GF0027910 | 1                            | 0                       | 0                           | 0 Hypothetical protein (1)                                        |                                                                                                                                                                                                                                                                                            |                                                                                                                                                                                                              | scaffold_3_mRNA_1809.1          | -                           | -                               |
| GF0027909 | 1                            | 0                       | 0                           | 0 Hypothetical protein (1)                                        |                                                                                                                                                                                                                                                                                            |                                                                                                                                                                                                              | scaffold_3_mRNA_1807.1          | -                           | -                               |
| GF0027908 | 1                            | 0                       | 0                           | 0 Hypothetical protein (1)                                        | nucleic acid binding [GO:0003676 molecular_function] (1); DNA integration [GO:0015074 biological_process] (1)                                                                                                                                                                              | Ribonuclease H-like domain [IPR012337] (1); Integrase, catalytic core [IPR001584] (1)                                                                                                                        | scaffold_3_mRNA_1804.1          | -                           | -                               |
| GF0027907 | 1                            | 0                       | 0                           | 0 Retrotransposon gag protein (1)                                 |                                                                                                                                                                                                                                                                                            |                                                                                                                                                                                                              | scaffold_3_mRNA_1803.1          | -                           | -                               |
| GF0027906 | 1                            | 0                       | 0                           | 0 Hypothetical protein (1)                                        | nucleic acid binding [GO:0003676 molecular_function] (1)                                                                                                                                                                                                                                   | Ribonuclease H-like domain [IPR012337] (1)                                                                                                                                                                   | scaffold_3_mRNA_1801.1          | -                           | -                               |
| GF0027905 | 1                            | 0                       | 0                           | 0 Hypothetical protein (1)                                        |                                                                                                                                                                                                                                                                                            |                                                                                                                                                                                                              | scaffold_3_mRNA_1798.1          | -                           | -                               |
| GF0027904 | 1                            | 0                       | 0                           | 0 Hypothetical protein (1)                                        |                                                                                                                                                                                                                                                                                            |                                                                                                                                                                                                              | scaffold_3_mRNA_1792.1          | -                           | -                               |
| GF0027903 | 1                            | 0                       | 0                           | 0 Hypothetical protein (1)                                        |                                                                                                                                                                                                                                                                                            |                                                                                                                                                                                                              | scaffold_3_mRNA_1791.1          | -                           | -                               |
| GF0027902 | 1                            | 0                       | 0                           | 0 Retrovirus-related Pol polyprotein from transposon TNT 1-94 (1) | zinc ion binding [GO:0008270 molecular_function] (1); nucleic acid binding [GO:0003676 molecular_function] (1)                                                                                                                                                                             | Zinc finger, CCHC-type [IPR001878] (1); Ribonuclease H-like domain [IPR012337] (1)                                                                                                                           | scaffold_3_mRNA_1788.1          | -                           | -                               |
| GF0027901 | 1                            | 0                       | 0                           | 0 Hypothetical protein (1)                                        |                                                                                                                                                                                                                                                                                            | Aspartic peptidase domain [IPR021109] (1)                                                                                                                                                                    | scaffold_3_mRNA_1787.1          | -                           | -                               |
| GF0027900 | 1                            | 0                       | 0                           | 0 Hypothetical protein (1)                                        |                                                                                                                                                                                                                                                                                            | Domain of unknown function DUF4216 [IPR025312] (1); Transposase-associated domain [IPR029480] (1)                                                                                                            | scaffold_3_mRNA_1785.1          | -                           | -                               |
| GF0027899 | 1                            | 0                       | 0                           | 0 Hypothetical protein (1)                                        |                                                                                                                                                                                                                                                                                            |                                                                                                                                                                                                              | scaffold_3_mRNA_1783.1          | -                           | -                               |
| GF0027898 | 1                            | 0                       | 0                           | 0 Hypothetical protein (1)                                        |                                                                                                                                                                                                                                                                                            |                                                                                                                                                                                                              | scaffold_3_mRNA_1782.1          | -                           | -                               |
| GF0027897 | 1                            | 0                       | 0                           | 0 Hypothetical protein (1)                                        |                                                                                                                                                                                                                                                                                            |                                                                                                                                                                                                              | scaffold_3_mRNA_1781.1          | -                           | -                               |
| GF0027896 | 1                            | 0                       | 0                           | 0 Hypothetical protein (1)                                        |                                                                                                                                                                                                                                                                                            |                                                                                                                                                                                                              | scaffold_3_mRNA_1780.1          | -                           | -                               |
| GF0027895 | 1                            | 0                       | 0                           | 0 Cytokinin riboside 5'-monophosphate phosphoribohydrolase (1)    |                                                                                                                                                                                                                                                                                            | LOG family [IPR031100] (1)                                                                                                                                                                                   | scaffold_3_mRNA_1779.1          | -                           | -                               |
| GF0027894 | 1                            | 0                       | 0                           | 0 Hypothetical protein (1)                                        |                                                                                                                                                                                                                                                                                            | Retrotransposon gag domain [IPR005162] (1)                                                                                                                                                                   | scaffold_3_mRNA_1778.1          | -                           | -                               |
| GF0027893 | 1                            | 0                       | 0                           | 0 Hypothetical protein (1)                                        |                                                                                                                                                                                                                                                                                            |                                                                                                                                                                                                              | scaffold_3_mRNA_1776.1          | -                           | -                               |
| GF0027892 | 1                            | 0                       | 0                           | 0 Hypothetical protein (1)                                        |                                                                                                                                                                                                                                                                                            |                                                                                                                                                                                                              | scaffold_3_mRNA_1773.1          | -                           | -                               |
| GF0027891 | 1                            | 0                       | 0                           | 0 Hypothetical protein (1)                                        |                                                                                                                                                                                                                                                                                            |                                                                                                                                                                                                              | scaffold_3_mRNA_1769.1          | -                           | -                               |
| GF0027890 | 1                            | 0                       | 0                           | 0 Hypothetical protein (1)                                        |                                                                                                                                                                                                                                                                                            |                                                                                                                                                                                                              | scaffold_3_mRNA_1768.1          | -                           | -                               |
| GF0027889 | 1                            | 0                       | 0                           | 0 Hypothetical protein (1)                                        |                                                                                                                                                                                                                                                                                            |                                                                                                                                                                                                              | scaffold_3_mRNA_1767.1          | -                           | -                               |
| GF0027888 | 1                            | 0                       | 0                           | 0 Hypothetical protein (1)                                        |                                                                                                                                                                                                                                                                                            |                                                                                                                                                                                                              | scaffold_3_mRNA_1759.1          | -                           | -                               |
| GF0027887 | 1                            | 0                       | 0                           | 0 Hypothetical protein (1)                                        |                                                                                                                                                                                                                                                                                            |                                                                                                                                                                                                              | scaffold_3_mRNA_1758.1          | -                           | -                               |
| GF0027886 | 1                            | 0                       | 0                           | 0 Integrase (1)                                                   |                                                                                                                                                                                                                                                                                            | Aspartic peptidase domain [IPR021109] (1)                                                                                                                                                                    | scaffold_3_mRNA_1757.1          | -                           | -                               |
| GF0027885 | 1                            | 0                       | 0                           | 0 Cytokinin riboside 5'-monophosphate phosphoribohydrolase (1)    |                                                                                                                                                                                                                                                                                            | LOG family [IPR031100] (1)                                                                                                                                                                                   | scaffold_3_mRNA_1755.1          | -                           | -                               |
| GF0027884 | 1                            | 0                       | 0                           | 0 Hypothetical protein (1)                                        |                                                                                                                                                                                                                                                                                            |                                                                                                                                                                                                              | scaffold_3_mRNA_1747.1          | -                           | -                               |
| GF0027883 | 1                            | 0                       | 0                           | 0 Cytokinin riboside 5'-monophosphate phosphoribohydrolase (1)    |                                                                                                                                                                                                                                                                                            | LOG family [IPR031100] (1)                                                                                                                                                                                   | scaffold_3_mRNA_1746.1          | -                           | -                               |
| GF0027882 | 1                            | 0                       | 0                           | 0 Hypothetical protein (1)                                        |                                                                                                                                                                                                                                                                                            |                                                                                                                                                                                                              | scaffold_3_mRNA_1745.1          | -                           | -                               |
| GF0027881 | 1                            | 0                       | 0                           | 0 Hypothetical protein (1)                                        |                                                                                                                                                                                                                                                                                            |                                                                                                                                                                                                              | scaffold_3_mRNA_1743.1          | -                           | -                               |
| GF0027880 | 1                            | 0                       | 0                           | 0 Hypothetical protein (1)                                        |                                                                                                                                                                                                                                                                                            |                                                                                                                                                                                                              | scaffold_3_mRNA_1739.1          | -                           | -                               |
| GF0027879 | 1                            | 0                       | 0                           | 0 Cytokinin riboside 5'-monophosphate phosphoribohydrolase (1)    |                                                                                                                                                                                                                                                                                            | LOG family [IPR031100] (1); Cytokinin riboside 5'-monophosphate phosphoribohydrolase LOG [IPR005269] (1)                                                                                                     | scaffold_3_mRNA_1738.1          | -                           | -                               |
| GF0027878 | 1                            | 0                       | 0                           | 0 Hypothetical protein (1)                                        | endopeptidase inhibitor activity [GO:0004866 molecular_function] (1)                                                                                                                                                                                                                       | Kunitz inhibitor ST1-like [IPR011065] (1); Proteinase inhibitor 13, Kunitz legume [IPR02160] (1)                                                                                                             | scaffold_3_mRNA_1736.1          | -                           | -                               |
| GF0027877 | 1                            | 0                       | 0                           | 0 Cytokinin riboside 5'-monophosphate phosphoribohydrolase (1)    |                                                                                                                                                                                                                                                                                            | LOG family [IPR031100] (1); Cytokinin riboside 5'-monophosphate phosphoribohydrolase LOG [IPR005269] (1)                                                                                                     | scaffold_3_mRNA_1734.1          | -                           | -                               |
| GF0027876 | 1                            | 0                       | 0                           | 0 Hypothetical protein (1)                                        |                                                                                                                                                                                                                                                                                            |                                                                                                                                                                                                              | scaffold_3_mRNA_1730.1          | -                           | -                               |
| GF0027875 | 1                            | 0                       | 0                           | 0 Hypothetical protein (1)                                        |                                                                                                                                                                                                                                                                                            |                                                                                                                                                                                                              | scaffold_3_mRNA_1723.1          | -                           | -                               |
| GF0027874 | 1                            | 0                       | 0                           | 0 Hypothetical protein (1)                                        |                                                                                                                                                                                                                                                                                            |                                                                                                                                                                                                              | scaffold_3_mRNA_1722.1          | -                           | -                               |
| GF0027873 | 1                            | 0                       | 0                           | 0 Hypothetical protein (1)                                        |                                                                                                                                                                                                                                                                                            |                                                                                                                                                                                                              | scaffold_3_mRNA_1716.1          | -                           | -                               |
| GF0027872 | 1                            | 0                       | 0                           | 0 Hypothetical protein (1)                                        |                                                                                                                                                                                                                                                                                            |                                                                                                                                                                                                              | scaffold_3_mRNA_1703.1          | -                           | -                               |
| GF0027871 | 1                            | 0                       | 0                           | 0 Hypothetical protein (1)                                        |                                                                                                                                                                                                                                                                                            |                                                                                                                                                                                                              | scaffold_3_mRNA_1702.1          | -                           | -                               |
| GF0027870 | 1                            | 0                       | 0                           | 0 Cytokinin riboside 5'-monophosphate phosphoribohydrolase (1)    |                                                                                                                                                                                                                                                                                            |                                                                                                                                                                                                              | scaffold_3_mRNA_1701.1          | -                           | -                               |

| ID        | Num. in <i>C. clementiae</i> | Num. in <i>C. uchiha</i> | Num. in <i>P. trifoliate</i> | Note                                                           | GO                                                                                                                                                                                                                                                                                                                                                                                                                                                       | InterPro                                                                                                                                                                                                                                          | Members in <i>C. clementiae</i> | Members in <i>C. uchiha</i> | Members in <i>P. trifoliate</i> |
|-----------|------------------------------|--------------------------|------------------------------|----------------------------------------------------------------|----------------------------------------------------------------------------------------------------------------------------------------------------------------------------------------------------------------------------------------------------------------------------------------------------------------------------------------------------------------------------------------------------------------------------------------------------------|---------------------------------------------------------------------------------------------------------------------------------------------------------------------------------------------------------------------------------------------------|---------------------------------|-----------------------------|---------------------------------|
| GF0027869 | 1                            | 0                        | 0                            | 0 Hypothetical protein (1)                                     |                                                                                                                                                                                                                                                                                                                                                                                                                                                          |                                                                                                                                                                                                                                                   | scaffold_3_mRNA_17.1            | -                           | -                               |
| GF0027868 | 1                            | 0                        | 0                            | 0 Retrotransposon protein, putative, Ty1-copia subclass (1)    | nucleic acid binding [GO:0003676 molecular_function] (1); zinc ion binding [GO:0005270 molecular_function] (1)                                                                                                                                                                                                                                                                                                                                           | Zinc finger, CCHC-type [IPR001878] (1)                                                                                                                                                                                                            | scaffold_3_mRNA_1695.1          | -                           | -                               |
| GF0027867 | 1                            | 0                        | 0                            | 0 Hypothetical protein (1)                                     |                                                                                                                                                                                                                                                                                                                                                                                                                                                          | LOG family [IPR031100] (1)                                                                                                                                                                                                                        | scaffold_3_mRNA_1694.1          | -                           | -                               |
| GF0027866 | 1                            | 0                        | 0                            | 0 Hypothetical protein (1)                                     |                                                                                                                                                                                                                                                                                                                                                                                                                                                          |                                                                                                                                                                                                                                                   | scaffold_3_mRNA_1692.1          | -                           | -                               |
| GF0027865 | 1                            | 0                        | 0                            | 0 Hypothetical protein (1)                                     |                                                                                                                                                                                                                                                                                                                                                                                                                                                          |                                                                                                                                                                                                                                                   | scaffold_3_mRNA_1691.1          | -                           | -                               |
| GF0027864 | 1                            | 0                        | 0                            | 0 Putative non-LTR retroelement reverse transcriptase (1)      | nucleic acid binding [GO:0003676 molecular_function] (1); zinc ion binding [GO:0005270 molecular_function] (1); sequence-specific DNA binding [GO:0043565 molecular_function] (1); regulation of transcription, DNA-templated [GO:0006355 biological_process] (1); transcription factor activity, sequence-specific DNA binding [GO:0003700 molecular_function] (1)                                                                                      | Reverse transcriptase zinc-binding domain [IPR026960] (1); Ribonuclease H-like domain [IPR012337] (1); Zinc finger, GATA-type [IPR006979] (1); Reverse transcriptase domain [IPR000477] (1); Endonuclease/exonuclease/phosphatase [IPR005155] (1) | scaffold_3_mRNA_1689.1          | -                           | -                               |
| GF0027863 | 1                            | 0                        | 0                            | 0 Hypothetical protein (1)                                     |                                                                                                                                                                                                                                                                                                                                                                                                                                                          |                                                                                                                                                                                                                                                   | scaffold_3_mRNA_1680.1          | -                           | -                               |
| GF0027862 | 1                            | 0                        | 0                            | 0 Cytokinin riboside 5'-monophosphate phosphoribohydrolase (1) |                                                                                                                                                                                                                                                                                                                                                                                                                                                          | LOG family [IPR031100] (1)                                                                                                                                                                                                                        | scaffold_3_mRNA_1679.1          | -                           | -                               |
| GF0027861 | 1                            | 0                        | 0                            | 0 Hypothetical protein (1)                                     |                                                                                                                                                                                                                                                                                                                                                                                                                                                          |                                                                                                                                                                                                                                                   | scaffold_3_mRNA_1678.1          | -                           | -                               |
| GF0027860 | 1                            | 0                        | 0                            | 0 Hypothetical protein (1)                                     |                                                                                                                                                                                                                                                                                                                                                                                                                                                          |                                                                                                                                                                                                                                                   | scaffold_3_mRNA_1677.1          | -                           | -                               |
| GF0027859 | 1                            | 0                        | 0                            | 0 Hypothetical protein (1)                                     | proteolysis [GO:0006508 biological_process] (1); cysteine-type peptidase activity [GO:0008234 molecular_function] (1)                                                                                                                                                                                                                                                                                                                                    | Ulp1 protease family, C-terminal catalytic domain [IPR001653] (1); Probable transposase, Pta/Era/Spm, plant [IPR004252] (1)                                                                                                                       | scaffold_3_mRNA_1676.1          | -                           | -                               |
| GF0027858 | 1                            | 0                        | 0                            | 0 Hypothetical protein (1)                                     |                                                                                                                                                                                                                                                                                                                                                                                                                                                          |                                                                                                                                                                                                                                                   | scaffold_3_mRNA_167.1           | -                           | -                               |
| GF0027857 | 1                            | 0                        | 0                            | 0 Hypothetical protein (1)                                     |                                                                                                                                                                                                                                                                                                                                                                                                                                                          |                                                                                                                                                                                                                                                   | scaffold_3_mRNA_1666.1          | -                           | -                               |
| GF0027856 | 1                            | 0                        | 0                            | 0 Hypothetical protein (1)                                     |                                                                                                                                                                                                                                                                                                                                                                                                                                                          |                                                                                                                                                                                                                                                   | scaffold_3_mRNA_1665.1          | -                           | -                               |
| GF0027855 | 1                            | 0                        | 0                            | 0 Hypothetical protein (1)                                     |                                                                                                                                                                                                                                                                                                                                                                                                                                                          |                                                                                                                                                                                                                                                   | scaffold_3_mRNA_1662.1          | -                           | -                               |
| GF0027854 | 1                            | 0                        | 0                            | 0 Hypothetical protein (1)                                     | intracellular signal transduction [GO:0035556 biological_process] (1)                                                                                                                                                                                                                                                                                                                                                                                    | DEP domain [IPR000591] (1)                                                                                                                                                                                                                        | scaffold_3_mRNA_1661.1          | -                           | -                               |
| GF0027853 | 1                            | 0                        | 0                            | 0 Hypothetical protein (1)                                     |                                                                                                                                                                                                                                                                                                                                                                                                                                                          | Aspartic peptidase domain [IPR021109] (1)                                                                                                                                                                                                         | scaffold_3_mRNA_1660.1          | -                           | -                               |
| GF0027852 | 1                            | 0                        | 0                            | 0 Hypothetical protein (1)                                     |                                                                                                                                                                                                                                                                                                                                                                                                                                                          |                                                                                                                                                                                                                                                   | scaffold_3_mRNA_1657.1          | -                           | -                               |
| GF0027851 | 1                            | 0                        | 0                            | 0 Hypothetical protein (1)                                     |                                                                                                                                                                                                                                                                                                                                                                                                                                                          | Transposase, MuDR, plant [IPR004332] (1)                                                                                                                                                                                                          | scaffold_3_mRNA_1654.1          | -                           | -                               |
| GF0027850 | 1                            | 0                        | 0                            | 0 Cytokinin riboside 5'-monophosphate phosphoribohydrolase (1) |                                                                                                                                                                                                                                                                                                                                                                                                                                                          | LOG family [IPR031100] (1)                                                                                                                                                                                                                        | scaffold_3_mRNA_1651.1          | -                           | -                               |
| GF0027849 | 1                            | 0                        | 0                            | 0 Hypothetical protein (1)                                     |                                                                                                                                                                                                                                                                                                                                                                                                                                                          |                                                                                                                                                                                                                                                   | scaffold_3_mRNA_1650.1          | -                           | -                               |
| GF0027848 | 1                            | 0                        | 0                            | 0 Hypothetical protein (1)                                     |                                                                                                                                                                                                                                                                                                                                                                                                                                                          | Myl/SANT-like domain [IPR024752] (1)                                                                                                                                                                                                              | scaffold_3_mRNA_1642.1          | -                           | -                               |
| GF0027847 | 1                            | 0                        | 0                            | 0 Putative nuclease HARB1 (1)                                  |                                                                                                                                                                                                                                                                                                                                                                                                                                                          | Harbinger transposase-derived nuclease domain [IPR027806] (1); Myb/SANT-like domain [IPR024752] (1)                                                                                                                                               | scaffold_3_mRNA_1640.1          | -                           | -                               |
| GF0027846 | 1                            | 0                        | 0                            | 0 Hypothetical protein (1)                                     |                                                                                                                                                                                                                                                                                                                                                                                                                                                          |                                                                                                                                                                                                                                                   | scaffold_3_mRNA_1635.1          | -                           | -                               |
| GF0027845 | 1                            | 0                        | 0                            | 0 Hypothetical protein (1)                                     |                                                                                                                                                                                                                                                                                                                                                                                                                                                          | LOG family [IPR031100] (1)                                                                                                                                                                                                                        | scaffold_3_mRNA_1634.1          | -                           | -                               |
| GF0027844 | 1                            | 0                        | 0                            | 0 Hypothetical protein (1)                                     |                                                                                                                                                                                                                                                                                                                                                                                                                                                          |                                                                                                                                                                                                                                                   | scaffold_3_mRNA_1633.1          | -                           | -                               |
| GF0027843 | 1                            | 0                        | 0                            | 0 Hypothetical protein (1)                                     |                                                                                                                                                                                                                                                                                                                                                                                                                                                          |                                                                                                                                                                                                                                                   | scaffold_3_mRNA_1632.1          | -                           | -                               |
| GF0027842 | 1                            | 0                        | 0                            | 0 Hypothetical protein (1)                                     |                                                                                                                                                                                                                                                                                                                                                                                                                                                          |                                                                                                                                                                                                                                                   | scaffold_3_mRNA_1631.1          | -                           | -                               |
| GF0027841 | 1                            | 0                        | 0                            | 0 Hypothetical protein (1)                                     |                                                                                                                                                                                                                                                                                                                                                                                                                                                          |                                                                                                                                                                                                                                                   | scaffold_3_mRNA_1629.1          | -                           | -                               |
| GF0027840 | 1                            | 0                        | 0                            | 0 Retrotransposon gag protein (1)                              | catalytic activity [GO:0003824 molecular_function] (1); biosynthetic process [GO:0009058 biological_process] (1)                                                                                                                                                                                                                                                                                                                                         | Phenazine biosynthesis PhzF protein [IPR003719] (1)                                                                                                                                                                                               | scaffold_3_mRNA_1604.1          | -                           | -                               |
| GF0027839 | 1                            | 0                        | 0                            | 0 Hypothetical protein (1)                                     |                                                                                                                                                                                                                                                                                                                                                                                                                                                          |                                                                                                                                                                                                                                                   | scaffold_3_mRNA_16.1            | -                           | -                               |
| GF0027837 | 1                            | 0                        | 0                            | 0 Hypothetical protein (1)                                     |                                                                                                                                                                                                                                                                                                                                                                                                                                                          |                                                                                                                                                                                                                                                   | scaffold_3_mRNA_1598.1          | -                           | -                               |
| GF0027836 | 1                            | 0                        | 0                            | 0 Hypothetical protein (1)                                     |                                                                                                                                                                                                                                                                                                                                                                                                                                                          |                                                                                                                                                                                                                                                   | scaffold_3_mRNA_1591.1          | -                           | -                               |
| GF0027835 | 1                            | 0                        | 0                            | 0 Hypothetical protein (1)                                     |                                                                                                                                                                                                                                                                                                                                                                                                                                                          |                                                                                                                                                                                                                                                   | scaffold_3_mRNA_1590.1          | -                           | -                               |
| GF0027834 | 1                            | 0                        | 0                            | 0 Hypothetical protein (1)                                     |                                                                                                                                                                                                                                                                                                                                                                                                                                                          |                                                                                                                                                                                                                                                   | scaffold_3_mRNA_1588.1          | -                           | -                               |
| GF0027833 | 1                            | 0                        | 0                            | 0 Hypothetical protein (1)                                     |                                                                                                                                                                                                                                                                                                                                                                                                                                                          |                                                                                                                                                                                                                                                   | scaffold_3_mRNA_1587.1          | -                           | -                               |
| GF0027832 | 1                            | 0                        | 0                            | 0 Hypothetical protein (1)                                     |                                                                                                                                                                                                                                                                                                                                                                                                                                                          | Zinc knuckle CX2CX4HX4C [IPR025836] (1)                                                                                                                                                                                                           | scaffold_3_mRNA_1584.1          | -                           | -                               |
| GF0027831 | 1                            | 0                        | 0                            | 0 Hypothetical protein (1)                                     | nucleic acid binding [GO:0003676 molecular_function] (1)                                                                                                                                                                                                                                                                                                                                                                                                 | Ribonuclease H-like domain [IPR012337] (1)                                                                                                                                                                                                        | scaffold_3_mRNA_1583.1          | -                           | -                               |
| GF0027830 | 1                            | 0                        | 0                            | 0 Hypothetical protein (1)                                     | metabolic process [GO:0008152 biological_process] (1); branched-chain amino acid biosynthetic process [GO:0009082 biological_process] (1); acetylactate synthase activity [GO:0003984 molecular_function] (1); serine-type endopeptidase activity [GO:0004252 molecular_function] (1); nucleic acid binding [GO:0003676 molecular_function] (1); amino acid binding [GO:0016097 molecular_function] (1); proteolysis [GO:0006508 biological_process] (1) | ACT domain [IPR002912] (1); Peptidase S1, PA clan [IPR009003] (1); Acetylactate synthase, small subunit [IPR004789] (1); Peptidase S1C [IPR010400] (1); Ribonuclease H-like domain [IPR012337] (1)                                                | scaffold_3_mRNA_1578.1          | -                           | -                               |
| GF0027829 | 1                            | 0                        | 0                            | 0 Far-red impaired responsive family protein isoform 1 (1)     | regulation of transcription, DNA-templated [GO:0006355 biological_process] (1)                                                                                                                                                                                                                                                                                                                                                                           | FHY3/FAR1 family [IPR031052] (1); FAR1 DNA binding domain [IPR004330] (1)                                                                                                                                                                         | scaffold_3_mRNA_1577.1          | -                           | -                               |
| GF0027828 | 1                            | 0                        | 0                            | 0 Hypothetical protein (1)                                     | protein dimerization activity [GO:0046083 molecular_function] (1); nucleic acid binding [GO:0003676 molecular_function] (1)                                                                                                                                                                                                                                                                                                                              | Ribonuclease H-like domain [IPR012337] (1); HAT, C-terminal dimerisation domain [IPR008906] (1)                                                                                                                                                   | scaffold_3_mRNA_1576.1          | -                           | -                               |
| GF0027827 | 1                            | 0                        | 0                            | 0 Hypothetical protein (1)                                     |                                                                                                                                                                                                                                                                                                                                                                                                                                                          |                                                                                                                                                                                                                                                   | scaffold_3_mRNA_1574.1          | -                           | -                               |
| GF0027826 | 1                            | 0                        | 0                            | 0 Hypothetical protein (1)                                     |                                                                                                                                                                                                                                                                                                                                                                                                                                                          |                                                                                                                                                                                                                                                   | scaffold_3_mRNA_1571.1          | -                           | -                               |
| GF0027825 | 1                            | 0                        | 0                            | 0 Hypothetical protein (1)                                     |                                                                                                                                                                                                                                                                                                                                                                                                                                                          |                                                                                                                                                                                                                                                   | scaffold_3_mRNA_1570.1          | -                           | -                               |
| GF0027824 | 1                            | 0                        | 0                            | 0 Hypothetical protein (1)                                     |                                                                                                                                                                                                                                                                                                                                                                                                                                                          |                                                                                                                                                                                                                                                   | scaffold_3_mRNA_1565.1          | -                           | -                               |
| GF0027823 | 1                            | 0                        | 0                            | 0 Hypothetical protein (1)                                     |                                                                                                                                                                                                                                                                                                                                                                                                                                                          |                                                                                                                                                                                                                                                   | scaffold_3_mRNA_1555.1          | -                           | -                               |
| GF0027822 | 1                            | 0                        | 0                            | 0 Hypothetical protein (1)                                     |                                                                                                                                                                                                                                                                                                                                                                                                                                                          |                                                                                                                                                                                                                                                   | scaffold_3_mRNA_1553.1          | -                           | -                               |
| GF0027821 | 1                            | 0                        | 0                            | 0 Hypothetical protein (1)                                     |                                                                                                                                                                                                                                                                                                                                                                                                                                                          |                                                                                                                                                                                                                                                   | scaffold_3_mRNA_1552.1          | -                           | -                               |
| GF0027820 | 1                            | 0                        | 0                            | 0 Hypothetical protein (1)                                     |                                                                                                                                                                                                                                                                                                                                                                                                                                                          |                                                                                                                                                                                                                                                   | scaffold_3_mRNA_1547.1          | -                           | -                               |
| GF0027819 | 1                            | 0                        | 0                            | 0 Hypothetical protein (1)                                     |                                                                                                                                                                                                                                                                                                                                                                                                                                                          |                                                                                                                                                                                                                                                   | scaffold_3_mRNA_1546.1          | -                           | -                               |
| GF0027818 | 1                            | 0                        | 0                            | 0 Hypothetical protein (1)                                     |                                                                                                                                                                                                                                                                                                                                                                                                                                                          |                                                                                                                                                                                                                                                   | scaffold_3_mRNA_1545.1          | -                           | -                               |
| GF0027817 | 1                            | 0                        | 0                            | 0 Hypothetical protein (1)                                     | nucleic acid binding [GO:0003676 molecular_function] (1)                                                                                                                                                                                                                                                                                                                                                                                                 | Ribonuclease H-like domain [IPR012337] (1)                                                                                                                                                                                                        | scaffold_3_mRNA_1541.1          | -                           | -                               |
| GF0027816 | 1                            | 0                        | 0                            | 0 Hypothetical protein (1)                                     |                                                                                                                                                                                                                                                                                                                                                                                                                                                          |                                                                                                                                                                                                                                                   | scaffold_3_mRNA_1540.1          | -                           | -                               |
| GF0027815 | 1                            | 0                        | 0                            | 0 Hypothetical protein (1)                                     |                                                                                                                                                                                                                                                                                                                                                                                                                                                          |                                                                                                                                                                                                                                                   | scaffold_3_mRNA_1532.1          | -                           | -                               |
| GF0027814 | 1                            | 0                        | 0                            | 0 Hypothetical protein (1)                                     |                                                                                                                                                                                                                                                                                                                                                                                                                                                          |                                                                                                                                                                                                                                                   | scaffold_3_mRNA_1527.1          | -                           | -                               |
| GF0027813 | 1                            | 0                        | 0                            | 0 Hypothetical protein (1)                                     |                                                                                                                                                                                                                                                                                                                                                                                                                                                          |                                                                                                                                                                                                                                                   | scaffold_3_mRNA_1526.1          | -                           | -                               |
| GF0027812 | 1                            | 0                        | 0                            | 0 Hypothetical protein (1)                                     |                                                                                                                                                                                                                                                                                                                                                                                                                                                          |                                                                                                                                                                                                                                                   | scaffold_3_mRNA_1525.1          | -                           | -                               |
| GF0027811 | 1                            | 0                        | 0                            | 0 Hypothetical protein (1)                                     |                                                                                                                                                                                                                                                                                                                                                                                                                                                          |                                                                                                                                                                                                                                                   | scaffold_3_mRNA_1524.1          | -                           | -                               |
| GF0027810 | 1                            | 0                        | 0                            | 0 Hypothetical protein (1)                                     |                                                                                                                                                                                                                                                                                                                                                                                                                                                          |                                                                                                                                                                                                                                                   | scaffold_3_mRNA_1521.1          | -                           | -                               |
| GF0027809 | 1                            | 0                        | 0                            | 0 Hypothetical protein (1)                                     |                                                                                                                                                                                                                                                                                                                                                                                                                                                          | Alpha/Beta hydrolase fold [IPR029058] (1)                                                                                                                                                                                                         | scaffold_3_mRNA_1520.1          | -                           | -                               |
| GF0027808 | 1                            | 0                        | 0                            | 0 Hypothetical protein (1)                                     |                                                                                                                                                                                                                                                                                                                                                                                                                                                          |                                                                                                                                                                                                                                                   | scaffold_3_mRNA_1519.1          | -                           | -                               |
| GF0027807 | 1                            | 0                        | 0                            | 0 Cytokinin riboside 5'-monophosphate phosphoribohydrolase (1) |                                                                                                                                                                                                                                                                                                                                                                                                                                                          | LOG family [IPR031100] (1)                                                                                                                                                                                                                        | scaffold_3_mRNA_1518.1          | -                           | -                               |
| GF0027806 | 1                            | 0                        | 0                            | 0 Hypothetical protein (1)                                     |                                                                                                                                                                                                                                                                                                                                                                                                                                                          | Retrotransposon gag domain [IPR005162] (1)                                                                                                                                                                                                        | scaffold_3_mRNA_1516.1          | -                           | -                               |
| GF0027805 | 1                            | 0                        | 0                            | 0 Hypothetical protein (1)                                     |                                                                                                                                                                                                                                                                                                                                                                                                                                                          |                                                                                                                                                                                                                                                   | scaffold_3_mRNA_1511.1          | -                           | -                               |
| GF0027804 | 1                            | 0                        | 0                            | 0 Hypothetical protein (1)                                     |                                                                                                                                                                                                                                                                                                                                                                                                                                                          |                                                                                                                                                                                                                                                   | scaffold_3_mRNA_1510.1          | -                           | -                               |
| GF0027803 | 1                            | 0                        | 0                            | 0 Hypothetical protein (1)                                     |                                                                                                                                                                                                                                                                                                                                                                                                                                                          |                                                                                                                                                                                                                                                   | scaffold_3_mRNA_151.1           | -                           | -                               |
| GF0027802 | 1                            | 0                        | 0                            | 0 Hypothetical protein (1)                                     |                                                                                                                                                                                                                                                                                                                                                                                                                                                          |                                                                                                                                                                                                                                                   | scaffold_3_mRNA_1506.1          | -                           | -                               |
| GF0027801 | 1                            | 0                        | 0                            | 0 Hypothetical protein (1)                                     |                                                                                                                                                                                                                                                                                                                                                                                                                                                          | Reverse transcriptase zinc-binding domain [IPR026960] (1)                                                                                                                                                                                         | scaffold_3_mRNA_1503.1          | -                           | -                               |
| GF0027800 | 1                            | 0                        | 0                            | 0 RNA-directed DNA polymerase (Reverse transcriptase) (1)      |                                                                                                                                                                                                                                                                                                                                                                                                                                                          | Reverse transcriptase domain [IPR000477] (1)                                                                                                                                                                                                      | scaffold_3_mRNA_1502.1          | -                           | -                               |
| GF0027799 | 1                            | 0                        | 0                            | 0 Hypothetical protein (1)                                     |                                                                                                                                                                                                                                                                                                                                                                                                                                                          |                                                                                                                                                                                                                                                   | scaffold_3_mRNA_1501.1          | -                           | -                               |
| GF0027798 | 1                            | 0                        | 0                            | 0 Hypothetical protein (1)                                     |                                                                                                                                                                                                                                                                                                                                                                                                                                                          |                                                                                                                                                                                                                                                   | scaffold_3_mRNA_1500.1          | -                           | -                               |
| GF0027797 | 1                            | 0                        | 0                            | 0 Hypothetical protein (1)                                     |                                                                                                                                                                                                                                                                                                                                                                                                                                                          |                                                                                                                                                                                                                                                   | scaffold_3_mRNA_1498.1          | -                           | -                               |
| GF0027796 | 1                            | 0                        | 0                            | 0 Hypothetical protein (1)                                     |                                                                                                                                                                                                                                                                                                                                                                                                                                                          |                                                                                                                                                                                                                                                   | scaffold_3_mRNA_1492.1          | -                           | -                               |
| GF0027795 | 1                            | 0                        | 0                            | 0 Hypothetical protein (1)                                     |                                                                                                                                                                                                                                                                                                                                                                                                                                                          | Retrotransposon gag domain [IPR005162] (1)                                                                                                                                                                                                        | scaffold_3_mRNA_1491.1          | -                           | -                               |
| GF0027794 | 1                            | 0                        | 0                            | 0 Hypothetical protein (1)                                     |                                                                                                                                                                                                                                                                                                                                                                                                                                                          |                                                                                                                                                                                                                                                   | scaffold_3_mRNA_1488.1          | -                           | -                               |
| GF0027793 | 1                            | 0                        | 0                            | 0 Hypothetical protein (1)                                     |                                                                                                                                                                                                                                                                                                                                                                                                                                                          |                                                                                                                                                                                                                                                   | scaffold_3_mRNA_1485.1          | -                           | -                               |
| GF0027792 | 1                            | 0                        | 0                            | 0 Hydrolase, alpha/beta fold family protein-like (1)           |                                                                                                                                                                                                                                                                                                                                                                                                                                                          | Alpha/Beta hydrolase fold [IPR029058] (1)                                                                                                                                                                                                         | scaffold_3_mRNA_1483.1          | -                           | -                               |
| GF0027791 | 1                            | 0                        | 0                            | 0 Hypothetical protein (1)                                     |                                                                                                                                                                                                                                                                                                                                                                                                                                                          |                                                                                                                                                                                                                                                   | scaffold_3_mRNA_1481.1          | -                           | -                               |
| GF0027790 | 1                            | 0                        | 0                            | 0 Hypothetical protein (1)                                     |                                                                                                                                                                                                                                                                                                                                                                                                                                                          |                                                                                                                                                                                                                                                   | scaffold_3_mRNA_1469.1          | -                           | -                               |
| GF0027789 | 1                            | 0                        | 0                            | 0 Hypothetical protein (1)                                     |                                                                                                                                                                                                                                                                                                                                                                                                                                                          |                                                                                                                                                                                                                                                   | scaffold_3_mRNA_1467.1          | -                           | -                               |
| GF0027788 | 1                            | 0                        | 0                            | 0 Hypothetical protein (1)                                     | nucleic acid binding [GO:0003676 molecular_function] (1); DNA binding [GO:0003677 molecular_function] (1)                                                                                                                                                                                                                                                                                                                                                | Zinc finger, BED-type [IPR003656] (1); Zinc finger C2H2-type [IPR013087] (1)                                                                                                                                                                      | scaffold_3_mRNA_1457.1          | -                           | -                               |
| GF0027787 | 1                            | 0                        | 0                            | 0 Hypothetical protein (1)                                     |                                                                                                                                                                                                                                                                                                                                                                                                                                                          |                                                                                                                                                                                                                                                   | scaffold_3_mRNA_1456.1          | -                           | -                               |

| ID        | Num. in <i>C. clementiae</i> | Num. in <i>C. uchiha</i> | Num. in <i>P. trifoliata</i> | Note | GO                                                               | InterPro                                                                                                                                                                                                                                                                                   | Members in <i>C. clementiae</i>                                                                                                                                                                                                                                                                                                        | Members in <i>C. uchiha</i> | Members in <i>P. trifoliata</i> |
|-----------|------------------------------|--------------------------|------------------------------|------|------------------------------------------------------------------|--------------------------------------------------------------------------------------------------------------------------------------------------------------------------------------------------------------------------------------------------------------------------------------------|----------------------------------------------------------------------------------------------------------------------------------------------------------------------------------------------------------------------------------------------------------------------------------------------------------------------------------------|-----------------------------|---------------------------------|
| GF0027786 | 1                            | 0                        | 0                            | 0    | Hypothetical protein (1)                                         |                                                                                                                                                                                                                                                                                            | scaffold_3_mRNA_1449.1                                                                                                                                                                                                                                                                                                                 | -                           | -                               |
| GF0027785 | 1                            | 0                        | 0                            | 0    | Hypothetical protein (1)                                         |                                                                                                                                                                                                                                                                                            | scaffold_3_mRNA_1447.1                                                                                                                                                                                                                                                                                                                 | -                           | -                               |
| GF0027784 | 1                            | 0                        | 0                            | 0    | Hypothetical protein (1)                                         | regulation of transcription, DNA-templated [GO:0006355]<br>biological_process (1); nucleic acid binding [GO:0003676]<br>molecular_function (1)                                                                                                                                             | Carlavirus nucleic acid-binding protein [IPRO02568] (1)                                                                                                                                                                                                                                                                                | -                           | -                               |
| GF0027783 | 1                            | 0                        | 0                            | 0    | Hypothetical protein (1)                                         |                                                                                                                                                                                                                                                                                            | scaffold_3_mRNA_1443.1                                                                                                                                                                                                                                                                                                                 | -                           | -                               |
| GF0027782 | 1                            | 0                        | 0                            | 0    | Hypothetical protein (1)                                         | ATP binding [GO:0005524]<br>molecular_function (1); protein kinase activity [GO:0004672]<br>molecular_function (1); protein phosphorylation [GO:0006468]<br>biological_process (1)                                                                                                         | Protein kinase, ATP binding site [IPRO17441] (1); Serine/threonine-protein kinase, active site [IPRO08271] (1); Serine-threonine/tyrosine-protein kinase, catalytic domain [IPRO1245] (1); Protein kinase domain [IPRO00719] (1); Protein kinase-like domain [IPRO11009] (1); Maltose-like carbohydrate-binding domain [IPRO24788] (1) | scaffold_3_mRNA_1440.1      | -                               |
| GF0027781 | 1                            | 0                        | 0                            | 0    | Hypothetical protein (1)                                         |                                                                                                                                                                                                                                                                                            | scaffold_3_mRNA_1438.1                                                                                                                                                                                                                                                                                                                 | -                           | -                               |
| GF0027780 | 1                            | 0                        | 0                            | 0    | Hypothetical protein (1)                                         |                                                                                                                                                                                                                                                                                            | scaffold_3_mRNA_1437.1                                                                                                                                                                                                                                                                                                                 | -                           | -                               |
| GF0027779 | 1                            | 0                        | 0                            | 0    | Hypothetical protein (1)                                         | proteolysis [GO:0006508]<br>biological_process (1); aspartic-type endopeptidase activity [GO:0004190]<br>molecular_function (1)                                                                                                                                                            | Retropesins [IPRO18061] (1); Aspartic peptidase, active site [IPRO1969] (1); Aspartic peptidase domain [IPRO21109] (1)                                                                                                                                                                                                                 | scaffold_3_mRNA_1431.1      | -                               |
| GF0027778 | 1                            | 0                        | 0                            | 0    | Retrotransposon gag protein (1)                                  |                                                                                                                                                                                                                                                                                            | scaffold_3_mRNA_1426.1                                                                                                                                                                                                                                                                                                                 | -                           | -                               |
| GF0027777 | 1                            | 0                        | 0                            | 0    | Hypothetical protein (1)                                         |                                                                                                                                                                                                                                                                                            | scaffold_3_mRNA_1419.1                                                                                                                                                                                                                                                                                                                 | -                           | -                               |
| GF0027776 | 1                            | 0                        | 0                            | 0    | Hypothetical protein (1)                                         | nucleic acid binding [GO:0003676]<br>molecular_function (1)                                                                                                                                                                                                                                | Ribonuclease H-like domain [IPRO12337] (1); FB2/DPI/HVA22-related protein [IPRO04345] (1)                                                                                                                                                                                                                                              | scaffold_3_mRNA_1418.1      | -                               |
| GF0027775 | 1                            | 0                        | 0                            | 0    | Hypothetical protein (1)                                         |                                                                                                                                                                                                                                                                                            | scaffold_3_mRNA_1409.1                                                                                                                                                                                                                                                                                                                 | -                           | -                               |
| GF0027774 | 1                            | 0                        | 0                            | 0    | Hypothetical protein (1)                                         |                                                                                                                                                                                                                                                                                            | scaffold_3_mRNA_1408.1                                                                                                                                                                                                                                                                                                                 | -                           | -                               |
| GF0027773 | 1                            | 0                        | 0                            | 0    | Hypothetical protein (1)                                         |                                                                                                                                                                                                                                                                                            | scaffold_3_mRNA_1404.1                                                                                                                                                                                                                                                                                                                 | -                           | -                               |
| GF0027772 | 1                            | 0                        | 0                            | 0    | Hypothetical protein (1)                                         |                                                                                                                                                                                                                                                                                            | scaffold_3_mRNA_1403.1                                                                                                                                                                                                                                                                                                                 | -                           | -                               |
| GF0027771 | 1                            | 0                        | 0                            | 0    | Hypothetical protein (1)                                         | oxidation-reduction process [GO:005114 biological_process] (1)                                                                                                                                                                                                                             | NAD(P)-binding domain [IPRO16040] (1); Alcohol dehydrogenase, C-terminal [IPRO13149] (1)                                                                                                                                                                                                                                               | scaffold_3_mRNA_1401.1      | -                               |
| GF0027770 | 1                            | 0                        | 0                            | 0    | Hypothetical protein (1)                                         |                                                                                                                                                                                                                                                                                            | scaffold_3_mRNA_1395.1                                                                                                                                                                                                                                                                                                                 | -                           | -                               |
| GF0027769 | 1                            | 0                        | 0                            | 0    | Hypothetical protein (1)                                         |                                                                                                                                                                                                                                                                                            | scaffold_3_mRNA_1394.1                                                                                                                                                                                                                                                                                                                 | -                           | -                               |
| GF0027768 | 1                            | 0                        | 0                            | 0    | Cytokinin riboside 5'-monophosphate phosphoribohydrolase (1)     |                                                                                                                                                                                                                                                                                            | LOG family [IPRO31100] (1)                                                                                                                                                                                                                                                                                                             | scaffold_3_mRNA_1393.1      | -                               |
| GF0027767 | 1                            | 0                        | 0                            | 0    | Hypothetical protein (1)                                         |                                                                                                                                                                                                                                                                                            | scaffold_3_mRNA_1391.1                                                                                                                                                                                                                                                                                                                 | -                           | -                               |
| GF0027766 | 1                            | 0                        | 0                            | 0    | Hypothetical protein (1)                                         | response to metal ion [GO:011038 biological_process] (1); phytochelatin biosynthetic process [GO:0046938 biological_process] (1); glutathione gamma-glutamylcysteinyltransferase activity [GO:0016756]<br>molecular_function (1); metal ion binding [GO:0046872]<br>molecular_function (1) | Phytochelatin synthase, C-terminal [IPRO15407] (1)                                                                                                                                                                                                                                                                                     | scaffold_3_mRNA_1390.1      | -                               |
| GF0027765 | 1                            | 0                        | 0                            | 0    | Hypothetical protein (1)                                         |                                                                                                                                                                                                                                                                                            | scaffold_3_mRNA_1386.1                                                                                                                                                                                                                                                                                                                 | -                           | -                               |
| GF0027764 | 1                            | 0                        | 0                            | 0    | Cytokinin riboside 5'-monophosphate phosphoribohydrolase (1)     |                                                                                                                                                                                                                                                                                            | Cytokinin riboside 5'-monophosphate phosphoribohydrolase LOG [IPRO05269] (1); LOG family [IPRO31100] (1)                                                                                                                                                                                                                               | scaffold_3_mRNA_1385.1      | -                               |
| GF0027763 | 1                            | 0                        | 0                            | 0    | Hypothetical protein (1)                                         |                                                                                                                                                                                                                                                                                            | scaffold_3_mRNA_1383.1                                                                                                                                                                                                                                                                                                                 | -                           | -                               |
| GF0027762 | 1                            | 0                        | 0                            | 0    | Hypothetical protein (1)                                         | zinc ion binding [GO:0008270]<br>molecular_function (1)                                                                                                                                                                                                                                    | Zinc finger, PMZ-type [IPRO06564] (1); Zinc finger, SWIM-type [IPRO07527] (1); Non-haem oxygenase N-terminal domain [IPRO26992] (1); Ispenacillin N synthase-like [IPRO27443] (1)                                                                                                                                                      | scaffold_3_mRNA_1382.1      | -                               |
| GF0027761 | 1                            | 0                        | 0                            | 0    | Hypothetical protein (1)                                         |                                                                                                                                                                                                                                                                                            | scaffold_3_mRNA_1380.1                                                                                                                                                                                                                                                                                                                 | -                           | -                               |
| GF0027760 | 1                            | 0                        | 0                            | 0    | Hypothetical protein (1)                                         |                                                                                                                                                                                                                                                                                            | scaffold_3_mRNA_1379.1                                                                                                                                                                                                                                                                                                                 | -                           | -                               |
| GF0027759 | 1                            | 0                        | 0                            | 0    | Hypothetical protein (1)                                         |                                                                                                                                                                                                                                                                                            | scaffold_3_mRNA_1378.1                                                                                                                                                                                                                                                                                                                 | -                           | -                               |
| GF0027758 | 1                            | 0                        | 0                            | 0    | Hypothetical protein (1)                                         | protein dimerization activity [GO:0046983 molecular_function] (1); nucleic acid binding [GO:0003676 molecular_function] (1)                                                                                                                                                                | Ribonuclease H-like domain [IPRO12337] (1); HAT, C-terminal dimerisation domain [IPRO08906] (1)                                                                                                                                                                                                                                        | scaffold_3_mRNA_1377.1      | -                               |
| GF0027757 | 1                            | 0                        | 0                            | 0    | Hypothetical protein (1)                                         |                                                                                                                                                                                                                                                                                            | scaffold_3_mRNA_1376.1                                                                                                                                                                                                                                                                                                                 | -                           | -                               |
| GF0027756 | 1                            | 0                        | 0                            | 0    | Hypothetical protein (1)                                         |                                                                                                                                                                                                                                                                                            | scaffold_3_mRNA_1375.1                                                                                                                                                                                                                                                                                                                 | -                           | -                               |
| GF0027755 | 1                            | 0                        | 0                            | 0    | Syn-copalyl-diphosphate synthase (1)                             |                                                                                                                                                                                                                                                                                            | Terpenoid cyclases/protein prenyltransferase alpha-alpha toroid [IPRO08930] (1)                                                                                                                                                                                                                                                        | scaffold_3_mRNA_1369.1      | -                               |
| GF0027754 | 1                            | 0                        | 0                            | 0    | Hypothetical protein (1)                                         |                                                                                                                                                                                                                                                                                            | scaffold_3_mRNA_1361.1                                                                                                                                                                                                                                                                                                                 | -                           | -                               |
| GF0027753 | 1                            | 0                        | 0                            | 0    | Hypothetical protein (1)                                         | nucleic acid binding [GO:0003676 molecular_function] (1)                                                                                                                                                                                                                                   | Reverse transcriptase domain [IPRO04077] (1); Reverse transcriptase zinc-binding domain [IPRO25960] (1); Ribonuclease H-like domain [IPRO12337] (1)                                                                                                                                                                                    | scaffold_3_mRNA_1359.1      | -                               |
| GF0027752 | 1                            | 0                        | 0                            | 0    | Hypothetical protein (1)                                         |                                                                                                                                                                                                                                                                                            | scaffold_3_mRNA_1358.1                                                                                                                                                                                                                                                                                                                 | -                           | -                               |
| GF0027751 | 1                            | 0                        | 0                            | 0    | Hypothetical protein (1)                                         |                                                                                                                                                                                                                                                                                            | scaffold_3_mRNA_1353.1                                                                                                                                                                                                                                                                                                                 | -                           | -                               |
| GF0027750 | 1                            | 0                        | 0                            | 0    | Hypothetical protein (1)                                         |                                                                                                                                                                                                                                                                                            | scaffold_3_mRNA_1352.1                                                                                                                                                                                                                                                                                                                 | -                           | -                               |
| GF0027749 | 1                            | 0                        | 0                            | 0    | Hypothetical protein (1)                                         |                                                                                                                                                                                                                                                                                            | scaffold_3_mRNA_1347.1                                                                                                                                                                                                                                                                                                                 | -                           | -                               |
| GF0027748 | 1                            | 0                        | 0                            | 0    | Hypothetical protein (1)                                         |                                                                                                                                                                                                                                                                                            | scaffold_3_mRNA_1341.1                                                                                                                                                                                                                                                                                                                 | -                           | -                               |
| GF0027747 | 1                            | 0                        | 0                            | 0    | Hypothetical protein (1)                                         | Hexadecanal dehydrogenase (acylating) activity [GO:0080019 molecular_function] (1)                                                                                                                                                                                                         | NAD(P)-binding domain [IPRO16040] (1); Male sterility, NAD-binding [IPRO13120] (1); Fatty acyl-CoA reductase [IPRO26055] (1); Fatty acyl-CoA reductase, C-terminal [IPRO33640] (1)                                                                                                                                                     | scaffold_3_mRNA_1333.1      | -                               |
| GF0027746 | 1                            | 0                        | 0                            | 0    | Retrotransposon protein, putative, Ty1-sopsis subclass (1)       |                                                                                                                                                                                                                                                                                            | Reverse transcriptase, RNA-dependent DNA polymerase [IPRO13103] (1)                                                                                                                                                                                                                                                                    | scaffold_3_mRNA_1329.1      | -                               |
| GF0027745 | 1                            | 0                        | 0                            | 0    | Hypothetical protein (1)                                         |                                                                                                                                                                                                                                                                                            | scaffold_3_mRNA_1325.1                                                                                                                                                                                                                                                                                                                 | -                           | -                               |
| GF0027744 | 1                            | 0                        | 0                            | 0    | Hypothetical protein (1)                                         |                                                                                                                                                                                                                                                                                            | scaffold_3_mRNA_1324.1                                                                                                                                                                                                                                                                                                                 | -                           | -                               |
| GF0027743 | 1                            | 0                        | 0                            | 0    | VQ motif-containing family protein (1)                           |                                                                                                                                                                                                                                                                                            | VQ [IPRO08889] (1)                                                                                                                                                                                                                                                                                                                     | scaffold_3_mRNA_1313.1      | -                               |
| GF0027742 | 1                            | 0                        | 0                            | 0    | Hypothetical protein (1)                                         |                                                                                                                                                                                                                                                                                            | scaffold_3_mRNA_1306.1                                                                                                                                                                                                                                                                                                                 | -                           | -                               |
| GF0027741 | 1                            | 0                        | 0                            | 0    | Hypothetical protein (1)                                         |                                                                                                                                                                                                                                                                                            | scaffold_3_mRNA_1302.1                                                                                                                                                                                                                                                                                                                 | -                           | -                               |
| GF0027740 | 1                            | 0                        | 0                            | 0    | Monosaccharide transport protein (1)                             |                                                                                                                                                                                                                                                                                            | scaffold_3_mRNA_131.1                                                                                                                                                                                                                                                                                                                  | -                           | -                               |
| GF0027739 | 1                            | 0                        | 0                            | 0    | Putative disease resistance protein (TMN-like) (1)               | protein binding [GO:0005515 molecular_function] (1); ADP binding [GO:0043531 molecular_function] (1); signal transduction [GO:0007165 biological_process] (1)                                                                                                                              | Toll interleukin-1 receptor homology (TIR) domain [IPRO0157] (1); P-loop containing nucleoside triphosphate hydrolase [IPRO27417] (1); NB-ARC [IPRO02182] (1)                                                                                                                                                                          | scaffold_3_mRNA_1296.1      | -                               |
| GF0027738 | 1                            | 0                        | 0                            | 0    | Hypothetical protein (1)                                         |                                                                                                                                                                                                                                                                                            | Leucine-rich repeat, typical subtype [IPRO03591] (1); Leucine-rich repeat domain, L domain-like [IPRO32675] (1)                                                                                                                                                                                                                        | scaffold_3_mRNA_1295.1      | -                               |
| GF0027737 | 1                            | 0                        | 0                            | 0    | Hypothetical protein (1)                                         |                                                                                                                                                                                                                                                                                            | scaffold_3_mRNA_1294.1                                                                                                                                                                                                                                                                                                                 | -                           | -                               |
| GF0027736 | 1                            | 0                        | 0                            | 0    | Hypothetical protein (1)                                         | protein binding [GO:0005515 molecular_function] (1); ADP binding [GO:0043531 molecular_function] (1); signal transduction [GO:0007165 biological_process] (1)                                                                                                                              | Toll interleukin-1 receptor homology (TIR) domain [IPRO0157] (1); Reverse transcriptase, RNA-dependent DNA polymerase [IPRO13103] (1); Winged helix-turn-helix DNA-binding domain [IPRO1199] (1); P-loop containing nucleoside triphosphate hydrolase [IPRO27417] (1); NB-ARC [IPRO02182] (1)                                          | scaffold_3_mRNA_1293.1      | -                               |
| GF0027735 | 1                            | 0                        | 0                            | 0    | Hypothetical protein (1)                                         |                                                                                                                                                                                                                                                                                            | scaffold_3_mRNA_1288.1                                                                                                                                                                                                                                                                                                                 | -                           | -                               |
| GF0027734 | 1                            | 0                        | 0                            | 0    | Cytokinin riboside 5'-monophosphate phosphoribohydrolase (1)     |                                                                                                                                                                                                                                                                                            | LOG family [IPRO31100] (1)                                                                                                                                                                                                                                                                                                             | scaffold_3_mRNA_1287.1      | -                               |
| GF0027733 | 1                            | 0                        | 0                            | 0    | Serine/threonine protein phosphatase 2A regulatory subunit A (1) | binding [GO:0005488 molecular_function] (1); protein binding [GO:0005515 molecular_function] (1)                                                                                                                                                                                           | HEAT, type 2 [IPRO21133] (1); HEAT repeat [IPRO03571] (1); Armadillo-like helical [IPRO11989] (1); Armadillo-type fold [IPRO16024] (1)                                                                                                                                                                                                 | scaffold_3_mRNA_1274.1      | -                               |
| GF0027732 | 1                            | 0                        | 0                            | 0    | Hypothetical protein (1)                                         |                                                                                                                                                                                                                                                                                            | scaffold_3_mRNA_1272.1                                                                                                                                                                                                                                                                                                                 | -                           | -                               |
| GF0027731 | 1                            | 0                        | 0                            | 0    | Hypothetical protein (1)                                         |                                                                                                                                                                                                                                                                                            | scaffold_3_mRNA_1269.1                                                                                                                                                                                                                                                                                                                 | -                           | -                               |
| GF0027730 | 1                            | 0                        | 0                            | 0    | Hypothetical protein (1)                                         |                                                                                                                                                                                                                                                                                            | scaffold_3_mRNA_1267.1                                                                                                                                                                                                                                                                                                                 | -                           | -                               |
| GF0027729 | 1                            | 0                        | 0                            | 0    | Cytokinin riboside 5'-monophosphate phosphoribohydrolase (1)     |                                                                                                                                                                                                                                                                                            | LOG family [IPRO31100] (1); Cytokinin riboside 5'-monophosphate phosphoribohydrolase LOG [IPRO05269] (1)                                                                                                                                                                                                                               | scaffold_3_mRNA_1266.1      | -                               |
| GF0027728 | 1                            | 0                        | 0                            | 0    | Hypothetical protein (1)                                         |                                                                                                                                                                                                                                                                                            | scaffold_3_mRNA_1265.1                                                                                                                                                                                                                                                                                                                 | -                           | -                               |
| GF0027727 | 1                            | 0                        | 0                            | 0    | Hypothetical protein (1)                                         |                                                                                                                                                                                                                                                                                            | scaffold_3_mRNA_1264.1                                                                                                                                                                                                                                                                                                                 | -                           | -                               |
| GF0027726 | 1                            | 0                        | 0                            | 0    | Hypothetical protein (1)                                         |                                                                                                                                                                                                                                                                                            | scaffold_3_mRNA_1263.1                                                                                                                                                                                                                                                                                                                 | -                           | -                               |
| GF0027725 | 1                            | 0                        | 0                            | 0    | Cytokinin riboside 5'-monophosphate phosphoribohydrolase (1)     |                                                                                                                                                                                                                                                                                            | LOG family [IPRO31100] (1)                                                                                                                                                                                                                                                                                                             | scaffold_3_mRNA_1261.1      | -                               |
| GF0027724 | 1                            | 0                        | 0                            | 0    | Zinc finger containing protein, putative (1)                     | zinc ion binding [GO:0008270 molecular_function] (1)                                                                                                                                                                                                                                       | Zinc finger, SWIM-type [IPRO07527] (1); Zinc finger, PMZ-type [IPRO06564] (1)                                                                                                                                                                                                                                                          | scaffold_3_mRNA_1254.1      | -                               |
| GF0027723 | 1                            | 0                        | 0                            | 0    | Hypothetical protein (1)                                         |                                                                                                                                                                                                                                                                                            | scaffold_3_mRNA_1253.1                                                                                                                                                                                                                                                                                                                 | -                           | -                               |
| GF0027722 | 1                            | 0                        | 0                            | 0    | Hypothetical protein (1)                                         |                                                                                                                                                                                                                                                                                            | scaffold_3_mRNA_1252.1                                                                                                                                                                                                                                                                                                                 | -                           | -                               |
| GF0027721 | 1                            | 0                        | 0                            | 0    | Hypothetical protein (1)                                         |                                                                                                                                                                                                                                                                                            | scaffold_3_mRNA_1246.1                                                                                                                                                                                                                                                                                                                 | -                           | -                               |

| ID       | Num. in <i>C. caryophyllata</i> | Num. in <i>C. uchiha</i> | Num. in <i>P. trifoliata</i> | Note                                                                                          | GO                                                                                                                                                                                          | InterPro                                                                                                                                                                                                                                               | Members in <i>C. caryophyllata</i> | Members in <i>C. uchiha</i> | Members in <i>P. trifoliata</i> |
|----------|---------------------------------|--------------------------|------------------------------|-----------------------------------------------------------------------------------------------|---------------------------------------------------------------------------------------------------------------------------------------------------------------------------------------------|--------------------------------------------------------------------------------------------------------------------------------------------------------------------------------------------------------------------------------------------------------|------------------------------------|-----------------------------|---------------------------------|
| GF002720 | 1                               | 0                        | 0                            | Carbon catabolite repressor-like protein (1)                                                  |                                                                                                                                                                                             | Endonuclease/exonuclease/phosphatase [IPR005135] (1)                                                                                                                                                                                                   | scaffold_3_mRNA_1245.1             | -                           | -                               |
| GF002719 | 1                               | 0                        | 0                            | Hypothetical protein (1)                                                                      |                                                                                                                                                                                             |                                                                                                                                                                                                                                                        | scaffold_3_mRNA_1244.1             | -                           | -                               |
| GF002718 | 1                               | 0                        | 0                            | Hypothetical protein (1)                                                                      |                                                                                                                                                                                             |                                                                                                                                                                                                                                                        | scaffold_3_mRNA_1240.1             | -                           | -                               |
| GF002717 | 1                               | 0                        | 0                            | Hypothetical protein (1)                                                                      |                                                                                                                                                                                             |                                                                                                                                                                                                                                                        | scaffold_3_mRNA_1237.1             | -                           | -                               |
| GF002716 | 1                               | 0                        | 0                            | Hypothetical protein (1)                                                                      | nucleic acid binding [GO:0003676 molecular_function] (1)                                                                                                                                    | Ribonuclease H-like domain [IPR012337] (1)                                                                                                                                                                                                             | scaffold_3_mRNA_1226.1             | -                           | -                               |
| GF002715 | 1                               | 0                        | 0                            | Hypothetical protein (1)                                                                      | nucleic acid binding [GO:0003676 molecular_function] (1); protein dimerization activity [GO:0046083 molecular_function] (1); DNA binding [GO:0003677 molecular_function] (1)                | Zinc finger C2H2-type [IPR013087] (1); Zinc finger, BED-type [IPR003656] (1); HAT, C-terminal dimerisation domain [IPR008996] (1)                                                                                                                      | scaffold_3_mRNA_1225.1             | -                           | -                               |
| GF002714 | 1                               | 0                        | 0                            | General transcription factor 2-related zinc finger protein (1)                                | nucleic acid binding [GO:0003676 molecular_function] (1); protein dimerization activity [GO:0046083 molecular_function] (1)                                                                 | Ribonuclease H-like domain [IPR012337] (1); HAT, C-terminal dimerisation domain [IPR008996] (1); Domain of unknown function DUF4371 [IPR025398] (1)                                                                                                    | scaffold_3_mRNA_1223.1             | -                           | -                               |
| GF002713 | 1                               | 0                        | 0                            | Hypothetical protein (1)                                                                      |                                                                                                                                                                                             |                                                                                                                                                                                                                                                        | scaffold_3_mRNA_1201.1             | -                           | -                               |
| GF002712 | 1                               | 0                        | 0                            | Hypothetical protein (1)                                                                      |                                                                                                                                                                                             |                                                                                                                                                                                                                                                        | scaffold_3_mRNA_1199.1             | -                           | -                               |
| GF002711 | 1                               | 0                        | 0                            | Hypothetical protein (1)                                                                      |                                                                                                                                                                                             |                                                                                                                                                                                                                                                        | scaffold_3_mRNA_1196.1             | -                           | -                               |
| GF002710 | 1                               | 0                        | 0                            | Retrotransposon protein, putative, Ty3-gypsy subclass (1)                                     |                                                                                                                                                                                             | Retrotransposon gag domain [IPR005162] (1)                                                                                                                                                                                                             | scaffold_3_mRNA_1188.1             | -                           | -                               |
| GF002709 | 1                               | 0                        | 0                            | Pre-mRNA-splicing factor syf2 (1)                                                             |                                                                                                                                                                                             | mRNA splicing factor SYF2 [IPR013260] (1)                                                                                                                                                                                                              | scaffold_3_mRNA_1159.1             | -                           | -                               |
| GF002708 | 1                               | 0                        | 0                            | Hypothetical protein (1)                                                                      | metabolic process [GO:0008152 biological_process] (1); transferase activity, transferring hexosyl groups [GO:0016758 molecular_function] (1)                                                | UDP-glucuronosyl-UDP-glucosyltransferase [IPR002213] (1)                                                                                                                                                                                               | scaffold_3_mRNA_1158.1             | -                           | -                               |
| GF002707 | 1                               | 0                        | 0                            | Hypothetical protein (1)                                                                      |                                                                                                                                                                                             |                                                                                                                                                                                                                                                        | scaffold_3_mRNA_1155.1             | -                           | -                               |
| GF002706 | 1                               | 0                        | 0                            | Hypothetical protein (1)                                                                      | nucleic acid binding [GO:0003676 molecular_function] (1)                                                                                                                                    | TB2/DP1/HVA22-related protein [IPR004345] (1); Ribonuclease H-like domain [IPR012337] (1)                                                                                                                                                              | scaffold_3_mRNA_1142.1             | -                           | -                               |
| GF002705 | 1                               | 0                        | 0                            | Hypothetical protein (1)                                                                      | nucleic acid binding [GO:0003676 molecular_function] (1)                                                                                                                                    | Ribonuclease H-like domain [IPR012337] (1)                                                                                                                                                                                                             | scaffold_3_mRNA_1131.1             | -                           | -                               |
| GF002704 | 1                               | 0                        | 0                            | Phytochelatin synthetase-like protein (1)                                                     | cell growth [GO:0016649 biological_process] (1); cellulose microfibril organization [GO:0010215 biological_process] (1); anchored component of membrane [GO:0031225 cellular_component] (1) | COBRA, plant [IPR006918] (1)                                                                                                                                                                                                                           | scaffold_3_mRNA_1127.1             | -                           | -                               |
| GF002703 | 1                               | 0                        | 0                            | COBRA-like extracellular glycosyl-phosphatidyl inositol-anchored protein family isoform 2 (1) | cell growth [GO:0016649 biological_process] (1); anchored component of membrane [GO:0031225 cellular_component] (1)                                                                         | COBRA, plant [IPR006918] (1)                                                                                                                                                                                                                           | scaffold_3_mRNA_1124.1             | -                           | -                               |
| GF002702 | 1                               | 0                        | 0                            | Hypothetical protein (1)                                                                      |                                                                                                                                                                                             | Retrotransposon gag domain [IPR005162] (1)                                                                                                                                                                                                             | scaffold_3_mRNA_111.1              | -                           | -                               |
| GF002701 | 1                               | 0                        | 0                            | Hypothetical protein (1)                                                                      |                                                                                                                                                                                             |                                                                                                                                                                                                                                                        | scaffold_3_mRNA_1097.1             | -                           | -                               |
| GF002700 | 1                               | 0                        | 0                            | Hypothetical protein (1)                                                                      |                                                                                                                                                                                             |                                                                                                                                                                                                                                                        | scaffold_3_mRNA_1088.1             | -                           | -                               |
| GF002699 | 1                               | 0                        | 0                            | Putative non-LTR reverse transcriptase (1)                                                    | nucleic acid binding [GO:0003676 molecular_function] (1)                                                                                                                                    | Reverse transcriptase zinc-binding domain [IPR026960] (1); Ribonuclease H-like domain [IPR012337] (1)                                                                                                                                                  | scaffold_3_mRNA_1085.1             | -                           | -                               |
| GF002698 | 1                               | 0                        | 0                            | ATP-dependent chaperone ClpB (1)                                                              | ATP binding [GO:0005524 molecular_function] (1)                                                                                                                                             | AAA+ ATPase domain [IPR003593] (1); ClpA/B, conserved site 1 [IPR018368] (1); P-loop containing nucleoside triphosphate hydrolase [IPR027417] (1); ClpA/ATPase, C-terminal [IPR019489] (1); ATPase, AAA-type, core [IPR003959] (1)                     | scaffold_3_mRNA_1075.1             | -                           | -                               |
| GF002697 | 1                               | 0                        | 0                            | UDP-glucosyltransferase 83A1 (1)                                                              | metabolic process [GO:0008152 biological_process] (1); transferase activity, transferring hexosyl groups [GO:0016758 molecular_function] (1)                                                | UDP-glucuronosyl-UDP-glucosyltransferase [IPR002213] (1)                                                                                                                                                                                               | scaffold_3_mRNA_1066.1             | -                           | -                               |
| GF002696 | 1                               | 0                        | 0                            | UDP-glucosyltransferase 83A1 (1)                                                              | transferase activity, transferring hexosyl groups [GO:0016758 molecular_function] (1); metabolic process [GO:0008152 biological_process] (1)                                                | UDP-glucuronosyl-UDP-glucosyltransferase [IPR002213] (1)                                                                                                                                                                                               | scaffold_3_mRNA_1064.1             | -                           | -                               |
| GF002695 | 1                               | 0                        | 0                            | Hypothetical protein (1)                                                                      |                                                                                                                                                                                             |                                                                                                                                                                                                                                                        | scaffold_3_mRNA_1062.1             | -                           | -                               |
| GF002694 | 1                               | 0                        | 0                            | Cytokinin riboside 5'-monophosphate phosphoribosylhydrolase (1)                               |                                                                                                                                                                                             | LOG family [IPR031100] (1)                                                                                                                                                                                                                             | scaffold_3_mRNA_1061.1             | -                           | -                               |
| GF002693 | 1                               | 0                        | 0                            | Bidirectional sugar transporter SWEET4 (1)                                                    | integral component of membrane [GO:0016021 cellular_component] (1)                                                                                                                          | SWEET sugar transporter [IPR004316] (1)                                                                                                                                                                                                                | scaffold_3_mRNA_105.1              | -                           | -                               |
| GF002692 | 1                               | 0                        | 0                            | Hypothetical protein (1)                                                                      |                                                                                                                                                                                             |                                                                                                                                                                                                                                                        | scaffold_3_mRNA_1046.1             | -                           | -                               |
| GF002691 | 1                               | 0                        | 0                            | AT box motif-containing protein, putative (1)                                                 | telomere maintenance [GO:0000723 biological_process] (1); DNA helicase activity [GO:0003678 molecular_function] (1); DNA repair [GO:0006281 biological_process] (1)                         | DNA helicase Pif1-like [IPR010285] (1); P-loop containing nucleoside triphosphate hydrolase [IPR027417] (1)                                                                                                                                            | scaffold_3_mRNA_1027.1             | -                           | -                               |
| GF002690 | 1                               | 0                        | 0                            | Hypothetical protein (1)                                                                      | nucleic acid binding [GO:0003676 molecular_function] (1); RNA-DNA hybrid ribonuclease activity [GO:0044523 molecular_function] (1)                                                          | Aspartic peptidase domain [IPR021109] (1); Ribonuclease H-like domain [IPR012337] (1); Ribonuclease H domain [IPR021546] (1)                                                                                                                           | scaffold_3_mRNA_1012.1             | -                           | -                               |
| GF002689 | 1                               | 0                        | 0                            | Hypothetical protein (1)                                                                      | GTP binding [GO:0005525 molecular_function] (1); transferase activity, transferring acyl groups other than amino-acyl groups [GO:0016747 molecular_function] (1)                            | Small GTPase superfamily, ARF/SAR type [IPR006689] (1); Transferase [IPR004340] (1); P-loop containing nucleoside triphosphate hydrolase [IPR027417] (1)                                                                                               | scaffold_2_mRNA_996.1              | -                           | -                               |
| GF002687 | 1                               | 0                        | 0                            | Hypothetical protein (1)                                                                      |                                                                                                                                                                                             | Bifunctional inhibitor/plant lipid transfer protein/seed storage helical domain [IPR016440] (1)                                                                                                                                                        | scaffold_2_mRNA_959.1              | -                           | -                               |
| GF002686 | 1                               | 0                        | 0                            | Kinase family protein with leucine-rich repeat domain (1)                                     | protein binding [GO:0005515 molecular_function] (1)                                                                                                                                         | Leucine-rich repeat, typical subtype [IPR003591] (1); Leucine-rich repeat domain, L domain-like [IPR0032675] (1); Leucine-rich repeat [IPR001611] (1)                                                                                                  | scaffold_2_mRNA_957.1              | -                           | -                               |
| GF002685 | 1                               | 0                        | 0                            | Hypothetical protein (1)                                                                      | protein binding [GO:0005515 molecular_function] (1)                                                                                                                                         | Leucine-rich repeat [IPR001611] (1); Leucine-rich repeat domain, L domain-like [IPR0032675] (1)                                                                                                                                                        | scaffold_2_mRNA_955.1              | -                           | -                               |
| GF002684 | 1                               | 0                        | 0                            | Hypothetical protein (1)                                                                      |                                                                                                                                                                                             |                                                                                                                                                                                                                                                        | scaffold_2_mRNA_946.1              | -                           | -                               |
| GF002683 | 1                               | 0                        | 0                            | Hypothetical protein (1)                                                                      | integral component of membrane [GO:0016021 cellular_component] (1); transporter activity [GO:0005215 molecular_function] (1)                                                                | Purine permease, plant [IPR030182] (1)                                                                                                                                                                                                                 | scaffold_2_mRNA_936.1              | -                           | -                               |
| GF002682 | 1                               | 0                        | 0                            | Hypothetical protein (1)                                                                      | oxidation-reduction process [GO:0055114 biological_process] (1); oxidoreductase activity [GO:0016491 molecular_function] (1)                                                                | Saccharopine dehydrogenase, NADP binding domain [IPR005097] (1); NAD(P)-binding domain [IPR016040] (1)                                                                                                                                                 | scaffold_2_mRNA_927.1              | -                           | -                               |
| GF002681 | 1                               | 0                        | 0                            | Hypothetical protein (1)                                                                      |                                                                                                                                                                                             |                                                                                                                                                                                                                                                        | scaffold_2_mRNA_925.1              | -                           | -                               |
| GF002680 | 1                               | 0                        | 0                            | Hypothetical protein (1)                                                                      |                                                                                                                                                                                             |                                                                                                                                                                                                                                                        | scaffold_2_mRNA_924.1              | -                           | -                               |
| GF002679 | 1                               | 0                        | 0                            | Hypothetical protein (1)                                                                      |                                                                                                                                                                                             |                                                                                                                                                                                                                                                        | scaffold_2_mRNA_921.1              | -                           | -                               |
| GF002678 | 1                               | 0                        | 0                            | Receptor like protein 33 (1)                                                                  | protein binding [GO:0005515 molecular_function] (1)                                                                                                                                         | Leucine-rich repeat-containing N-terminal, plant-type [IPR013210] (1); Leucine-rich repeat [IPR001611] (1); Leucine-rich repeat domain, L domain-like [IPR0032675] (1)                                                                                 | scaffold_2_mRNA_918.1              | -                           | -                               |
| GF002677 | 1                               | 0                        | 0                            | Retrotransposon protein, putative, unclassified (1)                                           | nucleic acid binding [GO:0003676 molecular_function] (1)                                                                                                                                    | Endonuclease/exonuclease/phosphatase domain [IPR00477] (1); Ribonuclease H-like domain [IPR012337] (1)                                                                                                                                                 | scaffold_2_mRNA_91.1               | -                           | -                               |
| GF002676 | 1                               | 0                        | 0                            | Transposon protein, putative, Pong subclass, expressed (1)                                    |                                                                                                                                                                                             | No apical meristem-associated, C-terminal domain [IPR029466] (1)                                                                                                                                                                                       | scaffold_2_mRNA_902.1              | -                           | -                               |
| GF002675 | 1                               | 0                        | 0                            | Disease resistance protein (CC-NBS-LRR class) family protein, putative (1)                    |                                                                                                                                                                                             | Leucine-rich repeat domain, L domain-like [IPR0032675] (1)                                                                                                                                                                                             | scaffold_2_mRNA_895.1              | -                           | -                               |
| GF002674 | 1                               | 0                        | 0                            | Hypothetical protein (1)                                                                      | ADP binding [GO:0043531 molecular_function] (1)                                                                                                                                             | P-loop containing nucleoside triphosphate hydrolase [IPR027417] (1); NB-ARC [IPR02132] (1)                                                                                                                                                             | scaffold_2_mRNA_894.1              | -                           | -                               |
| GF002673 | 1                               | 0                        | 0                            | Disease resistance protein (CC-NBS-LRR class) family protein (1)                              | ADP binding [GO:0043531 molecular_function] (1)                                                                                                                                             | NB-ARC [IPR02132] (1); AAA+ ATPase domain [IPR003593] (1); P-loop containing nucleoside triphosphate hydrolase [IPR027417] (1); Leucine-rich repeat domain, L domain-like [IPR0032675] (1); Winged helix-turn-helix DNA-binding domain [IPR011991] (1) | scaffold_2_mRNA_893.1              | -                           | -                               |
| GF002672 | 1                               | 0                        | 0                            | Hypothetical protein (1)                                                                      |                                                                                                                                                                                             | Leucine-rich repeat domain, L domain-like [IPR0032675] (1)                                                                                                                                                                                             | scaffold_2_mRNA_891.1              | -                           | -                               |
| GF002671 | 1                               | 0                        | 0                            | Hypothetical protein (1)                                                                      |                                                                                                                                                                                             |                                                                                                                                                                                                                                                        | scaffold_2_mRNA_890.1              | -                           | -                               |
| GF002670 | 1                               | 0                        | 0                            | Hypothetical protein (1)                                                                      |                                                                                                                                                                                             |                                                                                                                                                                                                                                                        | scaffold_2_mRNA_86.1               | -                           | -                               |
| GF002669 | 1                               | 0                        | 0                            | Protein TRANSPARENT TESTA 1 (1)                                                               | nucleic acid binding [GO:0003676 molecular_function] (1)                                                                                                                                    | Zinc finger C2H2-type [IPR013087] (1)                                                                                                                                                                                                                  | scaffold_2_mRNA_844.1              | -                           | -                               |
| GF002668 | 1                               | 0                        | 0                            | Hypothetical protein (1)                                                                      |                                                                                                                                                                                             |                                                                                                                                                                                                                                                        | scaffold_2_mRNA_843.1              | -                           | -                               |
| GF002667 | 1                               | 0                        | 0                            | Hypothetical protein (1)                                                                      | protein phosphorylation [GO:0006468 biological_process] (1); protein kinase activity [GO:0004672 molecular_function] (1); ATP binding [GO:0005524 molecular_function] (1)                   | Serine-threonine/tyrosine-protein kinase, catalytic domain [IPR001245] (1); Protein kinase-like domain [IPR011009] (1); Protein kinase domain [IPR000719] (1)                                                                                          | scaffold_2_mRNA_840.1              | -                           | -                               |

| ID        | Num. in <i>C. clementinae</i> | Num. in <i>C. uchiha</i> | Num. in <i>P. trifoliata</i> | Note                                                        | GO                                                                                                                                                                                                                                                                                                                 | InterPro                                                                                                                                                                                                                                                                                                                                                                                                                          | Members in <i>C. clementinae</i> | Members in <i>C. uchiha</i> | Members in <i>P. trifoliata</i> |
|-----------|-------------------------------|--------------------------|------------------------------|-------------------------------------------------------------|--------------------------------------------------------------------------------------------------------------------------------------------------------------------------------------------------------------------------------------------------------------------------------------------------------------------|-----------------------------------------------------------------------------------------------------------------------------------------------------------------------------------------------------------------------------------------------------------------------------------------------------------------------------------------------------------------------------------------------------------------------------------|----------------------------------|-----------------------------|---------------------------------|
| GF0027666 | 1                             | 0                        | 0                            | 0 Monosaccharide transport protein (1)                      |                                                                                                                                                                                                                                                                                                                    |                                                                                                                                                                                                                                                                                                                                                                                                                                   | scaffold_2_mRNA_838.1            | -                           | -                               |
| GF0027665 | 1                             | 0                        | 0                            | 0 Hypothetical protein (1)                                  |                                                                                                                                                                                                                                                                                                                    |                                                                                                                                                                                                                                                                                                                                                                                                                                   | scaffold_2_mRNA_837.1            | -                           | -                               |
| GF0027664 | 1                             | 0                        | 0                            | 0 Hypothetical protein (1)                                  |                                                                                                                                                                                                                                                                                                                    |                                                                                                                                                                                                                                                                                                                                                                                                                                   | scaffold_2_mRNA_833.1            | -                           | -                               |
| GF0027663 | 1                             | 0                        | 0                            | 0 LRR receptor-like kinase family protein (1)               | protein kinase activity [GO:0004672 molecular_function] (1); protein phosphorylation [GO:0006468 biological_process] (1); ATP binding [GO:0005524 molecular_function] (1); protein binding [GO:0005515 molecular_function] (1)                                                                                     | Tyrosine-protein kinase, active site [IPR002561] (1); Protein kinase, ATP binding site [IPR017441] (1); Leucine-rich repeat [IPR001611] (1); Protein kinase domain [IPR000719] (1); Protein kinase-like domain [IPR011009] (1); Leucine-rich repeat domain, L domain-like [IPR032675] (1)                                                                                                                                         | scaffold_2_mRNA_832.1            | -                           | -                               |
| GF0027662 | 1                             | 0                        | 0                            | 0 Hypothetical protein (1)                                  | ATP binding [GO:0005524 molecular_function] (1); protein kinase activity [GO:0004672 molecular_function] (1); protein phosphorylation [GO:0006468 biological_process] (1)                                                                                                                                          | Serine-threonine/tyrosine-protein kinase, catalytic domain [IPR012451] (1); Protein kinase domain [IPR000719] (1); Protein kinase-like domain [IPR011009] (1)                                                                                                                                                                                                                                                                     | scaffold_2_mRNA_830.1            | -                           | -                               |
| GF0027661 | 1                             | 0                        | 0                            | 0 LRR receptor-like kinase family protein (1)               | ATP binding [GO:0005524 molecular_function] (1); protein phosphorylation [GO:0006468 biological_process] (1); protein kinase activity [GO:0004672 molecular_function] (1); protein binding [GO:0005515 molecular_function] (1)                                                                                     | Protein kinase domain [IPR000719] (1); Protein kinase-like domain [IPR011009] (1); Leucine-rich repeat domain, L domain-like [IPR032675] (1); Tyrosine-protein kinase, active site [IPR002561] (1); Protein kinase, ATP binding site [IPR017441] (1); Leucine-rich repeat [IPR01611] (1)                                                                                                                                          | scaffold_2_mRNA_829.1            | -                           | -                               |
| GF0027660 | 1                             | 0                        | 0                            | 0 Ulp1 protease family, carboxy-terminal domain protein (1) | cysteine-type peptidase activity [GO:0008234 molecular_function] (1); proteolysis [GO:0006508 biological_process] (1)                                                                                                                                                                                              | Probable transposase, Pta/En/Spm, plant [IPR004252] (1); Ulp1 protease family, C-terminal catalytic domain [IPR003653] (1)                                                                                                                                                                                                                                                                                                        | scaffold_2_mRNA_82.1             | -                           | -                               |
| GF0027659 | 1                             | 0                        | 0                            | 0 Hypothetical protein (1)                                  |                                                                                                                                                                                                                                                                                                                    |                                                                                                                                                                                                                                                                                                                                                                                                                                   | scaffold_2_mRNA_819.1            | -                           | -                               |
| GF0027658 | 1                             | 0                        | 0                            | 0 Hypothetical protein (1)                                  |                                                                                                                                                                                                                                                                                                                    | Protein of unknown function DUF247, plant [IPR004158] (1)                                                                                                                                                                                                                                                                                                                                                                         | scaffold_2_mRNA_817.1            | -                           | -                               |
| GF0027657 | 1                             | 0                        | 0                            | 0 Hypothetical protein (1)                                  |                                                                                                                                                                                                                                                                                                                    | Protein of unknown function DUF247, plant [IPR004158] (1)                                                                                                                                                                                                                                                                                                                                                                         | scaffold_2_mRNA_814.1            | -                           | -                               |
| GF0027656 | 1                             | 0                        | 0                            | 0 Putative emuDR family transposase-like                    | zinc ion binding [GO:000270 molecular_function] (1); nucleic acid binding [GO:0003676 molecular_function] (1)                                                                                                                                                                                                      | MULE transposase domain [IPR018289] (1); Zinc finger, PMZ-type [IPR006564] (1); Zinc finger, SWIM-type [IPR005727] (1); Zinc finger, CCHC-type [IPR01878] (1)                                                                                                                                                                                                                                                                     | scaffold_2_mRNA_812.1            | -                           | -                               |
| GF0027655 | 1                             | 0                        | 0                            | 0 Hypothetical protein (1)                                  |                                                                                                                                                                                                                                                                                                                    |                                                                                                                                                                                                                                                                                                                                                                                                                                   | scaffold_2_mRNA_808.1            | -                           | -                               |
| GF0027654 | 1                             | 0                        | 0                            | 0 Hypothetical protein (1)                                  |                                                                                                                                                                                                                                                                                                                    |                                                                                                                                                                                                                                                                                                                                                                                                                                   | scaffold_2_mRNA_806.1            | -                           | -                               |
| GF0027653 | 1                             | 0                        | 0                            | 0 Cytokinin riboside 5'-monophosphate phosphoribidylase (1) |                                                                                                                                                                                                                                                                                                                    |                                                                                                                                                                                                                                                                                                                                                                                                                                   | scaffold_2_mRNA_804.1            | -                           | -                               |
| GF0027652 | 1                             | 0                        | 0                            | 0 DUF594 family protein (1)                                 |                                                                                                                                                                                                                                                                                                                    | Protein of unknown function DUF594 [IPR007658] (1); Domain of unknown function DUF420 [IPR025315] (1); Endonuclease/exonuclease/phosphatase [IPR005135] (1); Zinc knuckle [IPR025836] (1); Zinc finger, CCHC-type [IPR01878] (1); Ribonuclease H domain [IPR02156] (1); Domain of unknown function DUF4283 [IPR025558] (1); Ribonuclease H-like domain [IPR012337] (1); Reverse transcriptase zinc-binding domain [IPR026960] (1) | scaffold_2_mRNA_789.1            | -                           | -                               |
| GF0027651 | 1                             | 0                        | 0                            | 0 Hypothetical protein (1)                                  | nucleic acid binding [GO:0003676 molecular_function] (1); zinc ion binding [GO:000270 molecular_function] (1); RNA-DNA hybrid ribonuclease activity [GO:0004523 molecular_function] (1)                                                                                                                            | CX2CX4HX4C [IPR025836] (1); Zinc finger, CCHC-type [IPR01878] (1); Ribonuclease H domain [IPR02156] (1); Domain of unknown function DUF4283 [IPR025558] (1); Ribonuclease H-like domain [IPR012337] (1); Reverse transcriptase zinc-binding domain [IPR026960] (1)                                                                                                                                                                | scaffold_2_mRNA_779.1            | -                           | -                               |
| GF0027650 | 1                             | 0                        | 0                            | 0 Flavonoid 3-monoxygenase (1)                              | iron ion binding [GO:0005506 molecular_function] (1); heme binding [GO:0020037 molecular_function] (1); oxidation-reduction process [GO:0055114 biological_process] (1); oxidoreductase activity, acting on paired donors, with incorporation or reduction of molecular oxygen [GO:0016705 molecular_function] (1) | Cytochrome P450 [IPR001128] (1)                                                                                                                                                                                                                                                                                                                                                                                                   | scaffold_2_mRNA_778.1            | -                           | -                               |
| GF0027649 | 1                             | 0                        | 0                            | 0 Hypothetical protein (1)                                  | oxidation-reduction process [GO:0055114 biological_process] (1); oxidoreductase activity, acting on paired donors, with incorporation or reduction of molecular oxygen [GO:0016705 molecular_function] (1); heme binding [GO:0020037 molecular_function] (1); iron ion binding [GO:0005506 molecular_function] (1) | Cytochrome P450, conserved site [IPR017972] (1); Cytochrome P450, E-class, group I [IPR002401] (1); Cytochrome P450 [IPR001128] (1)                                                                                                                                                                                                                                                                                               | scaffold_2_mRNA_771.1            | -                           | -                               |
| GF0027648 | 1                             | 0                        | 0                            | 0 Hypothetical protein (1)                                  | oxidation-reduction process [GO:0055114 biological_process] (1); oxidoreductase activity, acting on paired donors, with incorporation or reduction of molecular oxygen [GO:0016705 molecular_function] (1); heme binding [GO:0020037 molecular_function] (1); iron ion binding [GO:0005506 molecular_function] (1) | Cytochrome P450 [IPR001128] (1)                                                                                                                                                                                                                                                                                                                                                                                                   | scaffold_2_mRNA_768.1            | -                           | -                               |
| GF0027647 | 1                             | 0                        | 0                            | 0 Cytochrome P450 71D8 (1)                                  | oxidation-reduction process [GO:0055114 biological_process] (1); oxidoreductase activity, acting on paired donors, with incorporation or reduction of molecular oxygen [GO:0016705 molecular_function] (1)                                                                                                         | Cytochrome P450 [IPR001128] (1)                                                                                                                                                                                                                                                                                                                                                                                                   | scaffold_2_mRNA_767.1            | -                           | -                               |
| GF0027646 | 1                             | 0                        | 0                            | 0 Flavonoid 3'-monoxygenase (1)                             | oxidoreductase activity, acting on paired donors, with incorporation or reduction of molecular oxygen [GO:0016705 molecular_function] (1); oxidation-reduction process [GO:0055114 biological_process] (1)                                                                                                         | Cytochrome P450 [IPR001128] (1)                                                                                                                                                                                                                                                                                                                                                                                                   | scaffold_2_mRNA_766.1            | -                           | -                               |
| GF0027645 | 1                             | 0                        | 0                            | 0 TMV resistance protein N (1)                              | signal transduction [GO:0007165 biological_process] (1); protein binding [GO:0005515 molecular_function] (1)                                                                                                                                                                                                       | Toll/interleukin-1 receptor homology (TIR) domain [IPR000157] (1)                                                                                                                                                                                                                                                                                                                                                                 | scaffold_2_mRNA_760.1            | -                           | -                               |
| GF0027644 | 1                             | 0                        | 0                            | 0 UDP-glycosyltransferase 92A1 (1)                          | transferase activity, transferring hexosyl groups [GO:0016758 molecular_function] (1); metabolic process [GO:0008152 biological_process] (1)                                                                                                                                                                       | UDP-glucuronosyl/UDP-glucosyltransferase [IPR002213] (1)                                                                                                                                                                                                                                                                                                                                                                          | scaffold_2_mRNA_754.1            | -                           | -                               |
| GF0027643 | 1                             | 0                        | 0                            | 0 UDP-glucose flavonoid 3-O-glycosyltransferase 7 (1)       | transferase activity, transferring hexosyl groups [GO:0016758 molecular_function] (1); metabolic process [GO:0008152 biological_process] (1)                                                                                                                                                                       | UDP-glucuronosyl/UDP-glucosyltransferase [IPR002213] (1)                                                                                                                                                                                                                                                                                                                                                                          | scaffold_2_mRNA_749.1            | -                           | -                               |
| GF0027642 | 1                             | 0                        | 0                            | 0 Hypothetical protein (1)                                  | transferase activity, transferring hexosyl groups [GO:0016758 molecular_function] (1); metabolic process [GO:0008152 biological_process] (1)                                                                                                                                                                       | UDP-glucuronosyl/UDP-glucosyltransferase [IPR002213] (1)                                                                                                                                                                                                                                                                                                                                                                          | scaffold_2_mRNA_747.1            | -                           | -                               |
| GF0027641 | 1                             | 0                        | 0                            | 0 UDP-glycosyltransferase 92A1 (1)                          | signal transduction [GO:0007165 biological_process] (1); protein binding [GO:0005515 molecular_function] (1)                                                                                                                                                                                                       | UDP-glucuronosyl/UDP-glucosyltransferase [IPR002213] (1)                                                                                                                                                                                                                                                                                                                                                                          | scaffold_2_mRNA_744.1            | -                           | -                               |
| GF0027640 | 1                             | 0                        | 0                            | 0 Hypothetical protein (1)                                  |                                                                                                                                                                                                                                                                                                                    |                                                                                                                                                                                                                                                                                                                                                                                                                                   | scaffold_2_mRNA_737.1            | -                           | -                               |
| GF0027639 | 1                             | 0                        | 0                            | 0 Hypothetical protein (1)                                  |                                                                                                                                                                                                                                                                                                                    |                                                                                                                                                                                                                                                                                                                                                                                                                                   | scaffold_2_mRNA_734.1            | -                           | -                               |
| GF0027638 | 1                             | 0                        | 0                            | 0 Hypothetical protein (1)                                  |                                                                                                                                                                                                                                                                                                                    |                                                                                                                                                                                                                                                                                                                                                                                                                                   | scaffold_2_mRNA_733.1            | -                           | -                               |
| GF0027637 | 1                             | 0                        | 0                            | 0 Hypothetical protein (1)                                  |                                                                                                                                                                                                                                                                                                                    |                                                                                                                                                                                                                                                                                                                                                                                                                                   | scaffold_2_mRNA_732.1            | -                           | -                               |
| GF0027636 | 1                             | 0                        | 0                            | 0 Hypothetical protein (1)                                  |                                                                                                                                                                                                                                                                                                                    |                                                                                                                                                                                                                                                                                                                                                                                                                                   | scaffold_2_mRNA_731.1            | -                           | -                               |
| GF0027635 | 1                             | 0                        | 0                            | 0 Hypothetical protein (1)                                  |                                                                                                                                                                                                                                                                                                                    | GAG-pre-integrase domain [IPR025724] (1)                                                                                                                                                                                                                                                                                                                                                                                          | scaffold_2_mRNA_728.1            | -                           | -                               |
| GF0027634 | 1                             | 0                        | 0                            | 0 Hypothetical protein (1)                                  |                                                                                                                                                                                                                                                                                                                    |                                                                                                                                                                                                                                                                                                                                                                                                                                   | scaffold_2_mRNA_723.1            | -                           | -                               |
| GF0027633 | 1                             | 0                        | 0                            | 0 Hypothetical protein (1)                                  |                                                                                                                                                                                                                                                                                                                    |                                                                                                                                                                                                                                                                                                                                                                                                                                   | scaffold_2_mRNA_720.1            | -                           | -                               |
| GF0027632 | 1                             | 0                        | 0                            | 0 Monosaccharide transport protein (1)                      |                                                                                                                                                                                                                                                                                                                    |                                                                                                                                                                                                                                                                                                                                                                                                                                   | scaffold_2_mRNA_719.1            | -                           | -                               |
| GF0027631 | 1                             | 0                        | 0                            | 0 Hypothetical protein (1)                                  |                                                                                                                                                                                                                                                                                                                    |                                                                                                                                                                                                                                                                                                                                                                                                                                   | scaffold_2_mRNA_714.1            | -                           | -                               |
| GF0027630 | 1                             | 0                        | 0                            | 0 Hypothetical protein (1)                                  | zinc ion binding [GO:000270 molecular_function] (1); nucleic acid binding [GO:0003676 molecular_function] (1)                                                                                                                                                                                                      | Zinc knuckle CX2CX4HX4C [IPR025836] (1); Zinc finger, CCHC-type [IPR01878] (1); Domain of unknown function DUF4283 [IPR025558] (1); Ribonuclease H-like domain [IPR012337] (1); Reverse transcriptase zinc-binding domain [IPR026960] (1)                                                                                                                                                                                         | scaffold_2_mRNA_713.1            | -                           | -                               |
| GF0027629 | 1                             | 0                        | 0                            | 0 Hypothetical protein (1)                                  |                                                                                                                                                                                                                                                                                                                    |                                                                                                                                                                                                                                                                                                                                                                                                                                   | scaffold_2_mRNA_706.1            | -                           | -                               |
| GF0027628 | 1                             | 0                        | 0                            | 0 Non-LTR reverse transcriptase (1)                         | nucleic acid binding [GO:0003676 molecular_function] (1); zinc ion binding [GO:000270 molecular_function] (1)                                                                                                                                                                                                      | Endonuclease/exonuclease/phosphatase [IPR005135] (1); Zinc finger, CCHC-type [IPR01878] (1)                                                                                                                                                                                                                                                                                                                                       | scaffold_2_mRNA_699.1            | -                           | -                               |

| ID        | Num in <i>C. clementinae</i> | Num in <i>C. uchiha</i> | Num in <i>P. trifoliata</i> | Note                                                                     | GO                                                                                                                                                                                                                                                                                                                                                                                                                                                                                                                                                                                | InterPro                                                                                                                                                                                                                                                                            | Members in <i>C. clementinae</i> | Members in <i>C. uchiha</i> | Members in <i>P. trifoliata</i> |
|-----------|------------------------------|-------------------------|-----------------------------|--------------------------------------------------------------------------|-----------------------------------------------------------------------------------------------------------------------------------------------------------------------------------------------------------------------------------------------------------------------------------------------------------------------------------------------------------------------------------------------------------------------------------------------------------------------------------------------------------------------------------------------------------------------------------|-------------------------------------------------------------------------------------------------------------------------------------------------------------------------------------------------------------------------------------------------------------------------------------|----------------------------------|-----------------------------|---------------------------------|
| GF0027627 | 1                            | 0                       | 0                           | 0 Hypothetical protein (1)                                               | lyase activity [GO:0016829]<br>molecular_function (1); terpene synthase activity [GO:0010333 molecular_function (1); metabolic process [GO:0008152 biological_process (1)                                                                                                                                                                                                                                                                                                                                                                                                         | Terpene synthase, N-terminal domain [IPR01986] (1); Terpenoid cyclases/protein prenyltransferase alpha-alpha torsion [IPR008930] (1)                                                                                                                                                | scaffold_2_mRNA_688.1            | -                           | -                               |
| GF0027626 | 1                            | 0                       | 0                           | 0 Hypothetical protein (1)                                               |                                                                                                                                                                                                                                                                                                                                                                                                                                                                                                                                                                                   |                                                                                                                                                                                                                                                                                     | scaffold_2_mRNA_687.1            | -                           | -                               |
| GF0027625 | 1                            | 0                       | 0                           | 0 Hypothetical protein (1)                                               |                                                                                                                                                                                                                                                                                                                                                                                                                                                                                                                                                                                   |                                                                                                                                                                                                                                                                                     | scaffold_2_mRNA_686.1            | -                           | -                               |
| GF0027624 | 1                            | 0                       | 0                           | 0 Hypothetical protein (1)                                               |                                                                                                                                                                                                                                                                                                                                                                                                                                                                                                                                                                                   |                                                                                                                                                                                                                                                                                     | scaffold_2_mRNA_677.1            | -                           | -                               |
| GF0027623 | 1                            | 0                       | 0                           | 0 Hypothetical protein (1)                                               |                                                                                                                                                                                                                                                                                                                                                                                                                                                                                                                                                                                   | Protein kinase-like domain [IPR011009] (1)                                                                                                                                                                                                                                          | scaffold_2_mRNA_673.1            | -                           | -                               |
| GF0027622 | 1                            | 0                       | 0                           | 0 G-type lectin S-receptor-like serine/threonine-protein kinase RLK1 (1) | ATP binding [GO:0005524 molecular_function (1); protein phosphorylation [GO:0006468 molecular_function (1); protein kinase activity [GO:0004672 molecular_function (1)                                                                                                                                                                                                                                                                                                                                                                                                            | Protein kinase-like domain [IPR011009] (1); Protein kinase domain [IPR000719] (1); Bulb-type lectin domain [IPR001480] (1); Serine/threonine-protein kinase, active site [IPR008271] (1); Protein kinase, ATP binding site [IPR017441] (1)                                          | scaffold_2_mRNA_666.1            | -                           | -                               |
| GF0027621 | 1                            | 0                       | 0                           | 0 Hypothetical protein (1)                                               | ATP binding [GO:0005524 molecular_function (1); protein kinase activity [GO:0004672 molecular_function (1); protein phosphorylation [GO:0006468 biological_process (1)                                                                                                                                                                                                                                                                                                                                                                                                            | Bulb-type lectin domain [IPR001480] (1); Serine/threonine-protein kinase, active site [IPR008271] (1); Protein kinase-like domain [IPR011009] (1); Protein kinase domain [IPR000719] (1)                                                                                            | scaffold_2_mRNA_665.1            | -                           | -                               |
| GF0027620 | 1                            | 0                       | 0                           | 0 Hypothetical protein (1)                                               |                                                                                                                                                                                                                                                                                                                                                                                                                                                                                                                                                                                   | GAG-pre-integrase domain [IPR025724] (1)                                                                                                                                                                                                                                            | scaffold_2_mRNA_662.1            | -                           | -                               |
| GF0027619 | 1                            | 0                       | 0                           | 0 G-type lectin S-receptor-like serine/threonine-protein kinase RLK1 (1) | ATP binding [GO:0005524 molecular_function (1); protein kinase activity [GO:0004672 molecular_function (1); protein phosphorylation [GO:0006468 biological_process (1)                                                                                                                                                                                                                                                                                                                                                                                                            | Protein kinase domain [IPR000719] (1); Protein kinase-like domain [IPR011009] (1); Protein kinase, ATP binding site [IPR017441] (1); Serine/threonine-protein kinase, active site [IPR008271] (1)                                                                                   | scaffold_2_mRNA_659.1            | -                           | -                               |
| GF0027618 | 1                            | 0                       | 0                           | 0 Hypothetical protein (1)                                               |                                                                                                                                                                                                                                                                                                                                                                                                                                                                                                                                                                                   |                                                                                                                                                                                                                                                                                     | scaffold_2_mRNA_657.1            | -                           | -                               |
| GF0027617 | 1                            | 0                       | 0                           | 0 Hypothetical protein (1)                                               |                                                                                                                                                                                                                                                                                                                                                                                                                                                                                                                                                                                   |                                                                                                                                                                                                                                                                                     | scaffold_2_mRNA_656.1            | -                           | -                               |
| GF0027616 | 1                            | 0                       | 0                           | 0 Hypothetical protein (1)                                               |                                                                                                                                                                                                                                                                                                                                                                                                                                                                                                                                                                                   |                                                                                                                                                                                                                                                                                     | scaffold_2_mRNA_654.1            | -                           | -                               |
| GF0027615 | 1                            | 0                       | 0                           | 0 2-oxoglutarate and Fe(II)-dependent oxygenase superfamily protein (1)  | oxidation-reduction process [GO:0055114 biological_process (1); oxidoreductase activity [GO:0016491 molecular_function (1)                                                                                                                                                                                                                                                                                                                                                                                                                                                        | Isopenicillin N synthase-like [IPR027443] (1); Non-haem dixygenase N-terminal domain [IPR026992] (1); Oxoglutarate/iron-dependent dixygenase [IPR06123] (1)                                                                                                                         | scaffold_2_mRNA_651.1            | -                           | -                               |
| GF0027614 | 1                            | 0                       | 0                           | 0 Hypothetical protein (1)                                               |                                                                                                                                                                                                                                                                                                                                                                                                                                                                                                                                                                                   |                                                                                                                                                                                                                                                                                     | scaffold_2_mRNA_638.1            | -                           | -                               |
| GF0027613 | 1                            | 0                       | 0                           | 0 Hypothetical protein (1)                                               |                                                                                                                                                                                                                                                                                                                                                                                                                                                                                                                                                                                   |                                                                                                                                                                                                                                                                                     | scaffold_2_mRNA_634.1            | -                           | -                               |
| GF0027612 | 1                            | 0                       | 0                           | 0 Hypothetical protein (1)                                               | zinc ion binding [GO:0008270 molecular_function (1)                                                                                                                                                                                                                                                                                                                                                                                                                                                                                                                               | Zinc finger, SWIM-type [IPR007527] (1); Zinc finger, PMZ-type [IPR006564] (1); MLL1 transposase domain [IPR018289] (1)                                                                                                                                                              | scaffold_2_mRNA_627.1            | -                           | -                               |
| GF0027611 | 1                            | 0                       | 0                           | 0 Callose synthase 3 (1)                                                 | membrane [GO:0016020 cellular_component (1); 1,3-beta-D-glucan synthase complex [GO:0000148 cellular_component (1); 1,3-beta-D-glucan synthase activity [GO:0003843 molecular_function (1); (1->3)-beta-D-glucan biosynthetic process [GO:0006075 biological_process (1)                                                                                                                                                                                                                                                                                                          | Glycosyl transferase, family 48 [IPR003440] (1); 1,3-beta-glucan synthase subunit FKSI-like, domain-1 [IPR026899] (1); Vacuolar protein sorting-associated protein Vial/Callose synthase, N-terminal domain [IPR023175] (1)                                                         | scaffold_2_mRNA_625.1            | -                           | -                               |
| GF0027610 | 1                            | 0                       | 0                           | 0 Peroxidase 15 (1)                                                      | oxidation-reduction process [GO:0055114 biological_process (1); peroxidase activity [GO:0004601 molecular_function (1); response to oxidative stress [GO:0006979 biological_process (1); hydrogen peroxide catabolic process [GO:0042744 biological_process (1); peroxidase activity [GO:0004601 molecular_function (1); oxidation-reduction process [GO:0055114 biological_process (1); heme binding [GO:0020037 molecular_function (1); response to oxidative stress [GO:0006979 biological_process (1); hydrogen peroxide catabolic process [GO:0042744 biological_process (1) | Haem peroxidase [IPR010255] (1); Haem peroxidase, plant/fungal/bacterial [IPR02016] (1); Secretory peroxidase [IPR033905] (1); Peroxidase, active site [IPR019794] (1); Peroxidases heme-ligand binding site [IPR019793] (1); Plant peroxidase [IPR000823] (1)                      | scaffold_2_mRNA_618.1            | -                           | -                               |
| GF0027609 | 1                            | 0                       | 0                           | 0 Peroxidase 15 (1)                                                      | oxidation-reduction process [GO:0055114 biological_process (1); heme binding [GO:0020037 molecular_function (1); response to oxidative stress [GO:0006979 biological_process (1); hydrogen peroxide catabolic process [GO:0042744 biological_process (1)                                                                                                                                                                                                                                                                                                                          | Secretory peroxidase [IPR033905] (1); Haem peroxidase, plant/fungal/bacterial [IPR02016] (1); Peroxidase, active site [IPR019794] (1); Plant peroxidase [IPR000823] (1); Haem peroxidase [IPR010255] (1)                                                                            | scaffold_2_mRNA_617.1            | -                           | -                               |
| GF0027608 | 1                            | 0                       | 0                           | 0 Hypothetical protein (1)                                               |                                                                                                                                                                                                                                                                                                                                                                                                                                                                                                                                                                                   |                                                                                                                                                                                                                                                                                     | scaffold_2_mRNA_599.1            | -                           | -                               |
| GF0027607 | 1                            | 0                       | 0                           | 0 Cytokinin riboside 5'-monophosphate phosphoribidylhydrolase (1)        |                                                                                                                                                                                                                                                                                                                                                                                                                                                                                                                                                                                   | LOG family [IPR031100] (1)                                                                                                                                                                                                                                                          | scaffold_2_mRNA_591.1            | -                           | -                               |
| GF0027606 | 1                            | 0                       | 0                           | 0 Hypothetical protein (1)                                               |                                                                                                                                                                                                                                                                                                                                                                                                                                                                                                                                                                                   |                                                                                                                                                                                                                                                                                     | scaffold_2_mRNA_590.1            | -                           | -                               |
| GF0027605 | 1                            | 0                       | 0                           | 0 Hypothetical protein (1)                                               |                                                                                                                                                                                                                                                                                                                                                                                                                                                                                                                                                                                   |                                                                                                                                                                                                                                                                                     | scaffold_2_mRNA_588.1            | -                           | -                               |
| GF0027604 | 1                            | 0                       | 0                           | 0 DUF247 domain protein (1)                                              |                                                                                                                                                                                                                                                                                                                                                                                                                                                                                                                                                                                   | Protein of unknown function DUF247, plant [IPR004158] (1)                                                                                                                                                                                                                           | scaffold_2_mRNA_586.1            | -                           | -                               |
| GF0027603 | 1                            | 0                       | 0                           | 0 Hypothetical protein (1)                                               |                                                                                                                                                                                                                                                                                                                                                                                                                                                                                                                                                                                   | GAG-pre-integrase domain [IPR025724] (1)                                                                                                                                                                                                                                            | scaffold_2_mRNA_585.1            | -                           | -                               |
| GF0027602 | 1                            | 0                       | 0                           | 0 UPE0481 protein (1)                                                    |                                                                                                                                                                                                                                                                                                                                                                                                                                                                                                                                                                                   | Protein of unknown function DUF247, plant [IPR004158] (1)                                                                                                                                                                                                                           | scaffold_2_mRNA_583.1            | -                           | -                               |
| GF0027601 | 1                            | 0                       | 0                           | 0 PPR containing plant-like protein (1)                                  | protein binding [GO:0005515 molecular_function (1)                                                                                                                                                                                                                                                                                                                                                                                                                                                                                                                                | Protein kinase-like domain [IPR011009] (1); Pentatricopeptide repeat [IPR002885] (1); Tetra-ricopeptide-like helical domain [IPR011990] (1)                                                                                                                                         | scaffold_2_mRNA_581.1            | -                           | -                               |
| GF0027600 | 1                            | 0                       | 0                           | 0 Hypothetical protein (1)                                               |                                                                                                                                                                                                                                                                                                                                                                                                                                                                                                                                                                                   | Protein of unknown function DUF247, plant [IPR004158] (1)                                                                                                                                                                                                                           | scaffold_2_mRNA_578.1            | -                           | -                               |
| GF0027599 | 1                            | 0                       | 0                           | 0 UPE0481 protein (1)                                                    |                                                                                                                                                                                                                                                                                                                                                                                                                                                                                                                                                                                   | Protein of unknown function DUF247, plant [IPR004158] (1)                                                                                                                                                                                                                           | scaffold_2_mRNA_575.1            | -                           | -                               |
| GF0027598 | 1                            | 0                       | 0                           | 0 Hypothetical protein (1)                                               |                                                                                                                                                                                                                                                                                                                                                                                                                                                                                                                                                                                   |                                                                                                                                                                                                                                                                                     | scaffold_2_mRNA_570.1            | -                           | -                               |
| GF0027597 | 1                            | 0                       | 0                           | 0 Hypothetical protein (1)                                               |                                                                                                                                                                                                                                                                                                                                                                                                                                                                                                                                                                                   |                                                                                                                                                                                                                                                                                     | scaffold_2_mRNA_569.1            | -                           | -                               |
| GF0027596 | 1                            | 0                       | 0                           | 0 Hypothetical protein (1)                                               |                                                                                                                                                                                                                                                                                                                                                                                                                                                                                                                                                                                   | Aspartic peptidase domain [IPR021109] (1)                                                                                                                                                                                                                                           | scaffold_2_mRNA_568.1            | -                           | -                               |
| GF0027595 | 1                            | 0                       | 0                           | 0 Cytochrome P450 83B1 (1)                                               | oxidation-reduction process [GO:0055114 biological_process (1); oxidoreductase activity, acting on paired donors, with incorporation or reduction of molecular oxygen [GO:0016705 molecular_function (1); oxidation-reduction process [GO:0055114 biological_process (1); iron ion binding [GO:0005506 molecular_function (1)                                                                                                                                                                                                                                                     | Cytochrome P450, E-class, group I [IPR002401] (1); Cytochrome P450 [IPR001128] (1)                                                                                                                                                                                                  | scaffold_2_mRNA_559.1            | -                           | -                               |
| GF0027594 | 1                            | 0                       | 0                           | 0 Caffeic acid 3-O-methyltransferase (1)                                 | protein dimerization activity [GO:0046983 molecular_function (1); O-methyltransferase activity [GO:0008171 molecular_function (1); methyltransferase activity [GO:0006168 molecular_function (1)                                                                                                                                                                                                                                                                                                                                                                                  | S-adenosyl-L-methionine-dependent methyltransferase [IPR029063] (1); O-methyltransferase COMT-type [IPR016461] (1); Plant methyltransferase dimerization [IPR012967] (1); O-methyltransferase, family 2 [IPR001077] (1); Winged helix-turn-helix DNA-binding domain [IPR011991] (1) | scaffold_2_mRNA_556.1            | -                           | -                               |
| GF0027593 | 1                            | 0                       | 0                           | 0 Hypothetical protein (1)                                               | O-methyltransferase activity [GO:0008171 molecular_function (1)                                                                                                                                                                                                                                                                                                                                                                                                                                                                                                                   | S-adenosyl-L-methionine-dependent methyltransferase [IPR029063] (1); Winged helix-turn-helix DNA-binding domain [IPR011991] (1); O-methyltransferase, family 2 [IPR001077] (1)                                                                                                      | scaffold_2_mRNA_551.1            | -                           | -                               |
| GF0027592 | 1                            | 0                       | 0                           | 0 Transmembrane protein 45B (1)                                          |                                                                                                                                                                                                                                                                                                                                                                                                                                                                                                                                                                                   | Protein of unknown function DUF716 (TMEM45) [IPR069904] (1)                                                                                                                                                                                                                         | scaffold_2_mRNA_549.1            | -                           | -                               |
| GF0027591 | 1                            | 0                       | 0                           | 0 Cytochrome P450 83B1 (1)                                               | oxidoreductase activity, acting on paired donors, with incorporation or reduction of molecular oxygen [GO:0016705 molecular_function (1); oxidation-reduction process [GO:0055114 biological_process (1); iron ion binding [GO:0005506 molecular_function (1); heme binding [GO:0020037 molecular_function (1)                                                                                                                                                                                                                                                                    | Cytochrome P450, converted site [IPR017972] (1); Cytochrome P450, E-class, group I [IPR002401] (1); Cytochrome P450 [IPR001128] (1)                                                                                                                                                 | scaffold_2_mRNA_546.1            | -                           | -                               |
| GF0027590 | 1                            | 0                       | 0                           | 0 Hypothetical protein (1)                                               | oxidoreductase activity, acting on the CH-CH group of donors [GO:0016627 molecular_function (1); integral component of membrane [GO:0016021 cellular_component (1); cisternolism [GO:0005737 cellular_component (1); lipid metabolic process [GO:0006629 biological_process (1)                                                                                                                                                                                                                                                                                                   | 3-oxo-5-alpha-steroid 4-dehydrogenase, C-terminal [IPR001104] (1)                                                                                                                                                                                                                   | scaffold_2_mRNA_527.1            | -                           | -                               |
| GF0027589 | 1                            | 0                       | 0                           | 0 Hypothetical protein (1)                                               |                                                                                                                                                                                                                                                                                                                                                                                                                                                                                                                                                                                   |                                                                                                                                                                                                                                                                                     | scaffold_2_mRNA_526.1            | -                           | -                               |
| GF0027588 | 1                            | 0                       | 0                           | 0 Hypothetical protein (1)                                               |                                                                                                                                                                                                                                                                                                                                                                                                                                                                                                                                                                                   |                                                                                                                                                                                                                                                                                     | scaffold_2_mRNA_504.1            | -                           | -                               |
| GF0027587 | 1                            | 0                       | 0                           | 0 Hypothetical protein (1)                                               | aspartic-type endopeptidase activity [GO:0004190 molecular_function (1); proteolysis [GO:0006508 biological_process (1); mitochondrial matrix [GO:0005759 cellular_component (1)                                                                                                                                                                                                                                                                                                                                                                                                  | Aspartic peptidase domain [IPR021109] (1); Aspartic peptidase, active site [IPR01969] (1)                                                                                                                                                                                           | scaffold_2_mRNA_503.1            | -                           | -                               |
| GF0027586 | 1                            | 0                       | 0                           | 0 Hypothetical protein (1)                                               |                                                                                                                                                                                                                                                                                                                                                                                                                                                                                                                                                                                   | Mitochondrial glycoprotein [IPR003428] (1)                                                                                                                                                                                                                                          | scaffold_2_mRNA_501.1            | -                           | -                               |
| GF0027585 | 1                            | 0                       | 0                           | 0 Hypothetical protein (1)                                               |                                                                                                                                                                                                                                                                                                                                                                                                                                                                                                                                                                                   |                                                                                                                                                                                                                                                                                     | scaffold_2_mRNA_496.1            | -                           | -                               |
| GF0027584 | 1                            | 0                       | 0                           | 0 Cytokinin riboside 5'-monophosphate phosphoribidylhydrolase (1)        |                                                                                                                                                                                                                                                                                                                                                                                                                                                                                                                                                                                   | LOG family [IPR031100] (1)                                                                                                                                                                                                                                                          | scaffold_2_mRNA_495.1            | -                           | -                               |

| ID        | Num. in <i>C. clementiae</i> | Num. in <i>C. uchiha</i> | Num. in <i>P. trifoliata</i> | Note                                                    | GO                                                                                                                                                                                                                                                                           | InterPro                                                                                                                                                                                                                                                                                                                                                  | Members in <i>C. clementiae</i> | Members in <i>C. uchiha</i> | Members in <i>P. trifoliata</i> |
|-----------|------------------------------|--------------------------|------------------------------|---------------------------------------------------------|------------------------------------------------------------------------------------------------------------------------------------------------------------------------------------------------------------------------------------------------------------------------------|-----------------------------------------------------------------------------------------------------------------------------------------------------------------------------------------------------------------------------------------------------------------------------------------------------------------------------------------------------------|---------------------------------|-----------------------------|---------------------------------|
| GF0027583 | 1                            | 0                        | 0                            | 0 Hypothetical protein (1)                              | nucleic acid binding [GO:0003676 molecular_function] (1)                                                                                                                                                                                                                     | Zinc knuckle CX2CX4HX4C [IPRO25856] (1); Ribonuclease H-like domain [IPRO1337] (1); Domain of unknown function DUF4283 [IPRO25558] (1)                                                                                                                                                                                                                    | scaffold_2_mRNA_478.1           | -                           | -                               |
| GF0027582 | 1                            | 0                        | 0                            | 0 Hypothetical protein (1)                              |                                                                                                                                                                                                                                                                              |                                                                                                                                                                                                                                                                                                                                                           | scaffold_2_mRNA_4712.1          | -                           | -                               |
| GF0027581 | 1                            | 0                        | 0                            | 0 Hypothetical protein (1)                              | zinc ion binding [GO:0008270 molecular_function] (1); protein binding [GO:0005515 molecular_function] (1)                                                                                                                                                                    | DYW domain [IPRO02867] (1); Tetratricopeptide-like helical domain [IPRO11990] (1)                                                                                                                                                                                                                                                                         | scaffold_2_mRNA_4707.1          | -                           | -                               |
| GF0027580 | 1                            | 0                        | 0                            | 0 Hexosyltransferase (1)                                | polylacturonate 4-alpha-galacturonosyltransferase activity [GO:0047262 molecular_function] (1); transferase activity, transferring glycosyl groups [GO:0016757 molecular_function] (1)                                                                                       | Nucleotide-diphospho-sugar transferases [IPRO20044] (1); Plant galacturonosyltransferase GAUT [IPRO29993] (1); Glycosyl transferase, family 8 [IPRO02495] (1)                                                                                                                                                                                             | scaffold_2_mRNA_4706.1          | -                           | -                               |
| GF0027579 | 1                            | 0                        | 0                            | 0 Hypothetical protein (1)                              |                                                                                                                                                                                                                                                                              |                                                                                                                                                                                                                                                                                                                                                           | scaffold_2_mRNA_47.1            | -                           | -                               |
| GF0027578 | 1                            | 0                        | 0                            | 0 RNA-directed DNA polymerase, related (1)              |                                                                                                                                                                                                                                                                              |                                                                                                                                                                                                                                                                                                                                                           | scaffold_2_mRNA_466.1           | -                           | -                               |
| GF0027577 | 1                            | 0                        | 0                            | 0 Hypothetical protein (1)                              |                                                                                                                                                                                                                                                                              |                                                                                                                                                                                                                                                                                                                                                           | scaffold_2_mRNA_4642.1          | -                           | -                               |
| GF0027576 | 1                            | 0                        | 0                            | 0 ER membrane protein complex subunit 3                 | membrane [GO:0016020 cellular_component] (1)                                                                                                                                                                                                                                 | ER membrane protein complex subunit 3 [IPRO05588] (1); Integral membrane protein EMC3/TMCO1-like [IPRO02809] (1)                                                                                                                                                                                                                                          | scaffold_2_mRNA_4637.1          | -                           | -                               |
| GF0027575 | 1                            | 0                        | 0                            | 0 Hypothetical protein (1)                              |                                                                                                                                                                                                                                                                              |                                                                                                                                                                                                                                                                                                                                                           | scaffold_2_mRNA_4636.1          | -                           | -                               |
| GF0027574 | 1                            | 0                        | 0                            | 0 Hypothetical protein (1)                              | oxidoreductase activity [GO:0016491 molecular_function] (1)                                                                                                                                                                                                                  | Short-chain dehydrogenase/reductase, conserved site [IPRO29004] (1); NAD(P)-binding domain [IPRO16040] (1); Short-chain dehydrogenase/reductase SDR [IPRO02347] (1)                                                                                                                                                                                       | scaffold_2_mRNA_4615.1          | -                           | -                               |
| GF0027573 | 1                            | 0                        | 0                            | 0 RPM1 interacting protein 4 transcript 2 (1)           |                                                                                                                                                                                                                                                                              | RNA, pathogenic type III effector avirulence factor Avr cleavage site [IPRO08700] (1)                                                                                                                                                                                                                                                                     | scaffold_2_mRNA_4612.1          | -                           | -                               |
| GF0027572 | 1                            | 0                        | 0                            | 0 Hypothetical protein (1)                              |                                                                                                                                                                                                                                                                              |                                                                                                                                                                                                                                                                                                                                                           | scaffold_2_mRNA_4510.1          | -                           | -                               |
| GF0027571 | 1                            | 0                        | 0                            | 0 Hypothetical protein (1)                              |                                                                                                                                                                                                                                                                              |                                                                                                                                                                                                                                                                                                                                                           | scaffold_2_mRNA_4508.1          | -                           | -                               |
| GF0027570 | 1                            | 0                        | 0                            | 0 Hypothetical protein (1)                              |                                                                                                                                                                                                                                                                              | Retrotransposon gag domain [IPRO01652] (1)                                                                                                                                                                                                                                                                                                                | scaffold_2_mRNA_4506.1          | -                           | -                               |
| GF0027569 | 1                            | 0                        | 0                            | 0 Hypothetical protein (1)                              | hydrolase activity, hydrolyzing O-glycosyl compounds [GO:0004553 molecular_function] (1); carbohydrate metabolic process [GO:0005975 biological_process] (1)                                                                                                                 | Glycoside hydrolase family 3 C-terminal domain [IPRO02772] (1); Immunoglobulin-like fold [IPRO13783] (1); Fibronectin type III-like domain [IPRO26891] (1)                                                                                                                                                                                                | scaffold_2_mRNA_4487.1          | -                           | -                               |
| GF0027568 | 1                            | 0                        | 0                            | 0 Chlorophyll a/b binding protein (1)                   | membrane [GO:0016020 cellular_component] (1); photosynthesis, light harvesting [GO:0009765 biological_process] (1)                                                                                                                                                           | Chlorophyll a/b binding protein domain [IPRO23329] (1); Chlorophyll A-B binding protein, plant [IPRO01544] (1); Chlorophyll A-B binding protein [IPRO02796] (1)                                                                                                                                                                                           | scaffold_2_mRNA_4483.1          | -                           | -                               |
| GF0027567 | 1                            | 0                        | 0                            | 0 Chlorophyll a/b binding protein (1)                   | membrane [GO:0016020 cellular_component] (1); photosynthesis, light harvesting [GO:0009765 biological_process] (1)                                                                                                                                                           | Chlorophyll a/b binding protein domain [IPRO23329] (1); Chlorophyll A-B binding protein, plant [IPRO01544] (1); Chlorophyll A-B binding protein [IPRO02796] (1)                                                                                                                                                                                           | scaffold_2_mRNA_4481.1          | -                           | -                               |
| GF0027566 | 1                            | 0                        | 0                            | 0 Hypothetical protein (1)                              |                                                                                                                                                                                                                                                                              | Leucine-rich repeat-containing N-terminal, plant-type [IPRO13210] (1); Leucine-rich repeat [IPRO01611] (1); Leucine-rich repeat, typical subtype [IPRO03591] (1); Leucine-rich repeat domain, L domain-like [IPRO32675] (1)                                                                                                                               | scaffold_2_mRNA_4455.1          | -                           | -                               |
| GF0027565 | 1                            | 0                        | 0                            | 0 Leucine-rich repeat protein kinase family protein (1) | protein binding [GO:0005515 molecular_function] (1)                                                                                                                                                                                                                          | Leucine-rich repeat [IPRO01611] (1); Serine/threonine-protein kinase, active site [IPRO08271] (1); Protein kinase, ATP binding site [IPRO17441] (1); Protein kinase-like domain [IPRO011009] (1); Leucine-rich repeat domain, L domain-like [IPRO32675] (1); Leucine-rich repeat, typical subtype [IPRO03591] (1); Protein kinase domain [IPRO000719] (1) | scaffold_2_mRNA_4403.1          | -                           | -                               |
| GF0027564 | 1                            | 0                        | 0                            | 0 Hypothetical protein (1)                              |                                                                                                                                                                                                                                                                              | Leucine-rich repeat [IPRO01611] (1); Serine/threonine-protein kinase, active site [IPRO08271] (1); Protein kinase, ATP binding site [IPRO17441] (1); Protein kinase-like domain [IPRO011009] (1); Leucine-rich repeat domain, L domain-like [IPRO32675] (1); Leucine-rich repeat, typical subtype [IPRO03591] (1); Protein kinase domain [IPRO000719] (1) | scaffold_2_mRNA_4402.1          | -                           | -                               |
| GF0027563 | 1                            | 0                        | 0                            | 0 LRR receptor-like kinase family protein (1)           | protein kinase activity [GO:0004672 molecular_function] (1); protein phosphorylation [GO:0006468 biological_process] (1); ATP binding [GO:0005524 molecular_function] (1); protein binding [GO:0005515 molecular_function] (1)                                               | Reverse transcriptase, RNA-dependent DNA polymerase [IPRO13103] (1)                                                                                                                                                                                                                                                                                       | scaffold_2_mRNA_4401.1          | -                           | -                               |
| GF0027562 | 1                            | 0                        | 0                            | 0 Hypothetical protein (1)                              |                                                                                                                                                                                                                                                                              | Reverse transcriptase, RNA-dependent DNA polymerase [IPRO13103] (1)                                                                                                                                                                                                                                                                                       | scaffold_2_mRNA_4400.1          | -                           | -                               |
| GF0027561 | 1                            | 0                        | 0                            | 0 Hypothetical protein (1)                              | protein domain specific binding [GO:0019904 molecular_function] (1)                                                                                                                                                                                                          | 14-3-3 protein, conserved site [IPRO23499] (1); 14-3-3 protein [IPRO00308] (1); Agmat domain, plant type [IPRO14002] (1); 14-3-3 domain [IPRO23410] (1); Agmat-like domain [IPRO08395] (1)                                                                                                                                                                | scaffold_2_mRNA_4380.1          | -                           | -                               |
| GF0027560 | 1                            | 0                        | 0                            | 0 Hypothetical protein (1)                              |                                                                                                                                                                                                                                                                              |                                                                                                                                                                                                                                                                                                                                                           | scaffold_2_mRNA_4359.1          | -                           | -                               |
| GF0027559 | 1                            | 0                        | 0                            | 0 Hypothetical protein (1)                              | zinc ion binding [GO:0008270 molecular_function] (1); regulation of transcription, DNA-templated [GO:0006355 biological_process] (1); nucleic acid binding [GO:0003676 molecular_function] (1)                                                                               | Zinc finger, PMZ-type [IPRO06564] (1); Zinc finger, SWIM-type [IPRO7527] (1); Zinc finger, CCHC-type [IPRO01878] (1); FHY3/FAR1 family [IPRO31052] (1)                                                                                                                                                                                                    | scaffold_2_mRNA_4337.1          | -                           | -                               |
| GF0027558 | 1                            | 0                        | 0                            | 0 Hypothetical protein (1)                              |                                                                                                                                                                                                                                                                              |                                                                                                                                                                                                                                                                                                                                                           | scaffold_2_mRNA_4303.1          | -                           | -                               |
| GF0027557 | 1                            | 0                        | 0                            | 0 Hypothetical protein (1)                              |                                                                                                                                                                                                                                                                              |                                                                                                                                                                                                                                                                                                                                                           | scaffold_2_mRNA_4285.1          | -                           | -                               |
| GF0027556 | 1                            | 0                        | 0                            | 0 Callose synthase 1 catalytic subunit-like protein (1) | (1->3)-beta-D-glucan biosynthetic process [GO:0006075 biological_process] (1); 1,3-beta-D-glucan synthase activity [GO:0003843 molecular_function] (1); 1,3-beta-D-glucan synthase complex [GO:0000148 cellular_component] (1); membrane [GO:0016020 cellular_component] (1) | Hisidine phosphatase superfamily, clade-1 [IPRO13078] (1); Glycosyl transferase family 48 [IPRO05440] (1); Hisidine phosphatase superfamily [IPRO29033] (1)                                                                                                                                                                                               | scaffold_2_mRNA_4273.1          | -                           | -                               |
| GF0027555 | 1                            | 0                        | 0                            | 0 Hypothetical protein (1)                              |                                                                                                                                                                                                                                                                              |                                                                                                                                                                                                                                                                                                                                                           | scaffold_2_mRNA_426.1           | -                           | -                               |
| GF0027554 | 1                            | 0                        | 0                            | 0 ABC transporter G family member 9 (1)                 | ATP binding [GO:0005524 molecular_function] (1); ATPase activity [GO:0016887 molecular_function] (1)                                                                                                                                                                         | ABC transporter-like [IPRO03439] (1); P-loop containing nucleoside triphosphate hydrolase [IPRO27417] (1)                                                                                                                                                                                                                                                 | scaffold_2_mRNA_4229.1          | -                           | -                               |
| GF0027553 | 1                            | 0                        | 0                            | 0 Hypothetical protein (1)                              |                                                                                                                                                                                                                                                                              |                                                                                                                                                                                                                                                                                                                                                           | scaffold_2_mRNA_4210.1          | -                           | -                               |
| GF0027552 | 1                            | 0                        | 0                            | 0 Nuclease S1 (1)                                       | DNA catabolic process [GO:0006308 biological_process] (1); hydrolase activity, acting on ester bonds [GO:0016788 molecular_function] (1); nucleic acid binding [GO:0003676 molecular_function] (1); endonuclease activity [GO:0004519 molecular_function] (1)                | SI/P1 nuclease [IPRO03154] (1); Phospholipase C/P1 nuclease domain [IPRO08947] (1)                                                                                                                                                                                                                                                                        | scaffold_2_mRNA_4206.1          | -                           | -                               |
| GF0027551 | 1                            | 0                        | 0                            | 0 Quinone oxidoreductase PIG3 (1)                       | oxidation-reduction process [GO:005114 biological_process] (1); oxidoreductase activity [GO:0016491 molecular_function] (1)                                                                                                                                                  | Quinone oxidoreductase PIG3 [IPRO14189] (1); NAD(P) binding domain [IPRO16040] (1); polyketide synthase, enoyltransferase domain [IPRO20843] (1); Alcohol dehydrogenase, N-terminal [IPRO13154] (1); Alcohol dehydrogenase, C-terminal [IPRO13149] (1); GroES-like [IPRO11032] (1)                                                                        | scaffold_2_mRNA_4205.1          | -                           | -                               |
| GF0027550 | 1                            | 0                        | 0                            | 0 Hypothetical protein (1)                              |                                                                                                                                                                                                                                                                              | Protein of unknown function DUF761, plant [IPRO08300] (1); Organic solute transporter subunit alpha/Transmembrane protein 184 [IPRO05178] (1)                                                                                                                                                                                                             | scaffold_2_mRNA_4200.1          | -                           | -                               |
| GF0027549 | 1                            | 0                        | 0                            | 0 Nuclear protein 12, 25 kDa protein (1)                |                                                                                                                                                                                                                                                                              | Nuclear protein 12 [IPRO19186] (1)                                                                                                                                                                                                                                                                                                                        | scaffold_2_mRNA_4193.1          | -                           | -                               |
| GF0027548 | 1                            | 0                        | 0                            | 0 Hypothetical protein (1)                              |                                                                                                                                                                                                                                                                              |                                                                                                                                                                                                                                                                                                                                                           | scaffold_2_mRNA_4192.1          | -                           | -                               |
| GF0027547 | 1                            | 0                        | 0                            | 0 Hypothetical protein (1)                              | structural molecule activity [GO:0005198 molecular_function] (1)                                                                                                                                                                                                             | Polyhedrin [IPRO01746] (1)                                                                                                                                                                                                                                                                                                                                | scaffold_2_mRNA_4183.1          | -                           | -                               |
| GF0027546 | 1                            | 0                        | 0                            | 0 Hypothetical protein (1)                              |                                                                                                                                                                                                                                                                              |                                                                                                                                                                                                                                                                                                                                                           | scaffold_2_mRNA_4180.1          | -                           | -                               |
| GF0027545 | 1                            | 0                        | 0                            | 0 Hypothetical protein (1)                              |                                                                                                                                                                                                                                                                              |                                                                                                                                                                                                                                                                                                                                                           | scaffold_2_mRNA_418.1           | -                           | -                               |
| GF0027544 | 1                            | 0                        | 0                            | 0 Hypothetical protein (1)                              |                                                                                                                                                                                                                                                                              |                                                                                                                                                                                                                                                                                                                                                           | scaffold_2_mRNA_4162.1          | -                           | -                               |
| GF0027543 | 1                            | 0                        | 0                            | 0 Cysteine-rich RLK (Receptor-like kinase protein) (1)  | protein phosphorylation [GO:0006468 biological_process] (1); protein kinase activity [GO:0004672 molecular_function] (1)                                                                                                                                                     | Protein kinase-like domain [IPRO11009] (1); Serine/threonine/tyrosine-protein kinase, catalytic domain [IPRO01245] (1)                                                                                                                                                                                                                                    | scaffold_2_mRNA_4153.1          | -                           | -                               |
| GF0027542 | 1                            | 0                        | 0                            | 0 Hypothetical protein (1)                              | nucleic acid binding [GO:0003676 molecular_function] (1); zinc ion binding [GO:0008270 molecular_function] (1)                                                                                                                                                               | Zinc finger, CCHC-type [IPRO01878] (1)                                                                                                                                                                                                                                                                                                                    | scaffold_2_mRNA_415.1           | -                           | -                               |
| GF0027541 | 1                            | 0                        | 0                            | 0 Adipocyte plasma membrane-associated protein (1)      | strictosidine synthase activity [GO:0016844 molecular_function] (1); biosynthetic process [GO:0009058 biological_process] (1)                                                                                                                                                | Six-bladed beta-propeller, Toll-like [IPRO11042] (1); Strictosidine synthase, conserved region [IPRO18119] (1); Strictosidine synthase [IPRO04411] (1)                                                                                                                                                                                                    | scaffold_2_mRNA_413.1           | -                           | -                               |
| GF0027540 | 1                            | 0                        | 0                            | 0 Cysteine-rich receptor-like protein kinase 25 (1)     |                                                                                                                                                                                                                                                                              | Protein kinase-like domain [IPRO11009] (1); Gnk2-homologous domain [IPRO29022] (1)                                                                                                                                                                                                                                                                        | scaffold_2_mRNA_4129.1          | -                           | -                               |
| GF0027539 | 1                            | 0                        | 0                            | 0 Monosaccharide transport protein (1)                  |                                                                                                                                                                                                                                                                              |                                                                                                                                                                                                                                                                                                                                                           | scaffold_2_mRNA_4127.1          | -                           | -                               |
| GF0027538 | 1                            | 0                        | 0                            | 0 Hypothetical protein (1)                              |                                                                                                                                                                                                                                                                              |                                                                                                                                                                                                                                                                                                                                                           | scaffold_2_mRNA_4126.1          | -                           | -                               |



| ID        | Num. in <i>C. celerantiae</i> | Num. in <i>C. uchiha</i> | Num. in <i>P. trifoliate</i> | Note                                                          | GO                                                                                                                                                                                                                                                                                                                                                                                         | InterPro                                                                                                                                                                                                                                                      | Members in <i>C. celerantiae</i> | Members in <i>C. uchiha</i> | Members in <i>P. trifoliate</i> |
|-----------|-------------------------------|--------------------------|------------------------------|---------------------------------------------------------------|--------------------------------------------------------------------------------------------------------------------------------------------------------------------------------------------------------------------------------------------------------------------------------------------------------------------------------------------------------------------------------------------|---------------------------------------------------------------------------------------------------------------------------------------------------------------------------------------------------------------------------------------------------------------|----------------------------------|-----------------------------|---------------------------------|
| GF0027537 | 1                             | 0                        | 0                            | 0 Hypothetical protein (1)                                    | viral process [GO:0016032 biological_process] (1)                                                                                                                                                                                                                                                                                                                                          | Retrovirus capsid, C-terminal [IPR008916] (1); Retrotransposon gag domain [IPR016162] (1); Retroviral nucleocapsid protein Gag [IPR000721] (1)                                                                                                                | scaffold_2_mRNA_4125.1           | -                           | -                               |
| GF0027536 | 1                             | 0                        | 0                            | 0 Hypothetical protein (1)                                    |                                                                                                                                                                                                                                                                                                                                                                                            | Gak2-homologous domain [IPR002902] (1)                                                                                                                                                                                                                        | scaffold_2_mRNA_4124.1           | -                           | -                               |
| GF0027535 | 1                             | 0                        | 0                            | 0 Vacuolar iron transporter like 4 (1)                        |                                                                                                                                                                                                                                                                                                                                                                                            | Ccc1 family [IPR008217] (1)                                                                                                                                                                                                                                   | scaffold_2_mRNA_4096.1           | -                           | -                               |
| GF0027534 | 1                             | 0                        | 0                            | 0 Hypothetical protein (1)                                    |                                                                                                                                                                                                                                                                                                                                                                                            |                                                                                                                                                                                                                                                               | scaffold_2_mRNA_408.1            | -                           | -                               |
| GF0027533 | 1                             | 0                        | 0                            | 0 Hypothetical protein (1)                                    |                                                                                                                                                                                                                                                                                                                                                                                            |                                                                                                                                                                                                                                                               | scaffold_2_mRNA_4078.1           | -                           | -                               |
| GF0027532 | 1                             | 0                        | 0                            | 0 Hypothetical protein (1)                                    |                                                                                                                                                                                                                                                                                                                                                                                            | LOG family [IPR031100] (1)                                                                                                                                                                                                                                    | scaffold_2_mRNA_405.1            | -                           | -                               |
| GF0027531 | 1                             | 0                        | 0                            | 0 Hypothetical protein (1)                                    | metalloendopeptidase activity [GO:0044222 molecular_function] (1); zinc ion binding [GO:0008270 molecular_function] (1); metalloprotease activity [GO:0008237 molecular_function] (1); proteolysis [GO:0006508 biological_process] (1); extracellular matrix [GO:0031012 cellular_component] (1)                                                                                           | Peptidase M10A, cysteine switch, zinc binding site [IPR021158] (1); Metalloprotease, catalytic domain [IPR024079] (1); Peptidoglycan binding-like [IPR002477] (1)                                                                                             | scaffold_2_mRNA_4031.1           | -                           | -                               |
| GF0027530 | 1                             | 0                        | 0                            | 0 ABC transporter C family member 2 (1)                       | ATPase activity, coupled to transmembrane movement of substances [GO:0042626 molecular_function] (1); transmembrane transport [GO:0055085 biological_process] (1); ATP binding [GO:0005224 molecular_function] (1); ATPase activity [GO:0016887 molecular_function] (1); integral component of membrane [GO:0016021 cellular_component] (1); transport [GO:0006810 biological_process] (1) | ABC transporter-like [IPR003439] (1); ABC transporter type 1, transmembrane domain [IPR011527] (1); AAA+ ATPase domain [IPR003593] (1); P-loop containing nucleoside triphosphate hydrolase [IPR027417] (1); ABC transporter, conserved site [IPR017871] (1)  | scaffold_2_mRNA_4028.1           | -                           | -                               |
| GF0027529 | 1                             | 0                        | 0                            | 0 Hypothetical protein (1)                                    |                                                                                                                                                                                                                                                                                                                                                                                            |                                                                                                                                                                                                                                                               | scaffold_2_mRNA_402.1            | -                           | -                               |
| GF0027528 | 1                             | 0                        | 0                            | 0 Glycolipid transfer protein domain-containing protein 1 (1) | glycolipid transport [GO:0046836 biological_process] (1); glycolipid transporter activity [GO:0017089 molecular_function] (1); glycolipid binding [GO:0051861 molecular_function] (1); cytoplasm [GO:0005737 cellular_component] (1)                                                                                                                                                       | Glycolipid transfer protein domain [IPR014830] (1)                                                                                                                                                                                                            | scaffold_2_mRNA_4019.1           | -                           | -                               |
| GF0027527 | 1                             | 0                        | 0                            | 0 Hypothetical protein (1)                                    |                                                                                                                                                                                                                                                                                                                                                                                            |                                                                                                                                                                                                                                                               | scaffold_2_mRNA_4000.1           | -                           | -                               |
| GF0027526 | 1                             | 0                        | 0                            | 0 Hypothetical protein (1)                                    |                                                                                                                                                                                                                                                                                                                                                                                            |                                                                                                                                                                                                                                                               | scaffold_2_mRNA_3999.1           | -                           | -                               |
| GF0027525 | 1                             | 0                        | 0                            | 0 Tubulin beta-9 chain (1)                                    | GTPase activity [GO:0003924 molecular_function] (1); microtubule-based process [GO:0007017 biological_process] (1); GTP binding [GO:0005255 molecular_function] (1); microtubule [GO:0005874 cellular_component] (1); structural constituent of cytoskeleton [GO:0005200 molecular_function] (1)                                                                                           | Tubulin [IPR000217] (1); Beta tubulin, autoregulation binding site [IPR013838] (1); Beta tubulin [IPR02433] (1); Tubulin, conserved site [IPR017975] (1); Tubulin/FtsZ, GTPase domain [IPR003088] (1)                                                         | scaffold_2_mRNA_3988.1           | -                           | -                               |
| GF0027524 | 1                             | 0                        | 0                            | 0 Hypothetical protein (1)                                    |                                                                                                                                                                                                                                                                                                                                                                                            |                                                                                                                                                                                                                                                               | scaffold_2_mRNA_3984.1           | -                           | -                               |
| GF0027523 | 1                             | 0                        | 0                            | 0 Hypothetical protein (1)                                    | iron ion binding [GO:0005506 molecular_function] (1); lipid biosynthetic process [GO:0006010 biological_process] (1); oxidoreductase activity [GO:0016491 molecular_function] (1); oxidation-reduction process [GO:0055114 biological_process] (1)                                                                                                                                         | Fatty acid hydroxylase [IPR006694] (1)                                                                                                                                                                                                                        | scaffold_2_mRNA_3983.1           | -                           | -                               |
| GF0027522 | 1                             | 0                        | 0                            | 0 FAD-binding Berberine family protein (1)                    | oxidoreductase activity, acting on CH-OH group of donors [GO:0016614 molecular_function] (1); flavin adenine dinucleotide binding [GO:0050660 molecular_function] (1); oxidoreductase activity [GO:0016491 molecular_function] (1); oxidation-reduction process [GO:0055114 biological_process] (1)                                                                                        | Berberine/berberine-like [IPR012951] (1); FAD-binding, type 2, subdomain 1 [IPR016167] (1); CO dehydrogenase flavoprotein-like, FAD-binding, subdomain 2 [IPR016169] (1); FAD linked oxidase, N-terminal [IPR006094] (1); FAD-binding, type 2 [IPR016166] (1) | scaffold_2_mRNA_3980.1           | -                           | -                               |
| GF0027521 | 1                             | 0                        | 0                            | 0 FAD-binding Berberine family protein (1)                    | oxidoreductase activity, acting on CH-OH group of donors [GO:0016614 molecular_function] (1); catalytic activity [GO:0003824 molecular_function] (1); oxidoreductase activity [GO:0016491 molecular_function] (1); oxidation-reduction process [GO:0055114 biological_process] (1); flavin adenine dinucleotide binding [GO:0050660 molecular_function] (1)                                | FAD-binding, type 2, subdomain 1 [IPR016167] (1); CO dehydrogenase flavoprotein-like, FAD-binding, subdomain 2 [IPR016169] (1); FAD linked oxidase, N-terminal [IPR006094] (1); FAD-binding, type 2 [IPR016166] (1); Berberine/berberine-like [IPR012951] (1) | scaffold_2_mRNA_3975.1           | -                           | -                               |
| GF0027520 | 1                             | 0                        | 0                            | 0 FAD-binding Berberine family protein (1)                    | oxidoreductase activity, acting on CH-OH group of donors [GO:0016614 molecular_function] (1); catalytic activity [GO:0003824 molecular_function] (1); flavin adenine dinucleotide binding [GO:0050660 molecular_function] (1); oxidoreductase activity [GO:0016491 molecular_function] (1); oxidation-reduction process [GO:0055114 biological_process] (1)                                | CO dehydrogenase flavoprotein-like, FAD-binding, subdomain 2 [IPR016169] (1); FAD-binding, type 2, subdomain 1 [IPR016167] (1); FAD-binding, type 2 [IPR016166] (1); FAD linked oxidase, N-terminal [IPR006094] (1); Berberine/berberine-like [IPR012951] (1) | scaffold_2_mRNA_3974.1           | -                           | -                               |
| GF0027519 | 1                             | 0                        | 0                            | 0 Hypothetical protein (1)                                    |                                                                                                                                                                                                                                                                                                                                                                                            | LOG family [IPR031100] (1)                                                                                                                                                                                                                                    | scaffold_2_mRNA_3971.1           | -                           | -                               |
| GF0027518 | 1                             | 0                        | 0                            | 0 Hypothetical protein (1)                                    |                                                                                                                                                                                                                                                                                                                                                                                            |                                                                                                                                                                                                                                                               | scaffold_2_mRNA_3970.1           | -                           | -                               |
| GF0027517 | 1                             | 0                        | 0                            | 0 Retinoline oxidase (1)                                      | oxidoreductase activity [GO:0016491 molecular_function] (1); oxidation-reduction process [GO:0055114 biological_process] (1); flavin adenine dinucleotide binding [GO:0050660 molecular_function] (1); catalytic activity [GO:0003824 molecular_function] (1); oxidoreductase activity, acting on CH-OH group of donors [GO:0016614 molecular_function] (1)                                | CO dehydrogenase flavoprotein-like, FAD-binding, subdomain 2 [IPR016169] (1); FAD linked oxidase, N-terminal [IPR006094] (1); FAD-binding, type 2 [IPR016166] (1)                                                                                             | scaffold_2_mRNA_3969.1           | -                           | -                               |
| GF0027516 | 1                             | 0                        | 0                            | 0 Hypothetical protein (1)                                    |                                                                                                                                                                                                                                                                                                                                                                                            |                                                                                                                                                                                                                                                               | scaffold_2_mRNA_3957.1           | -                           | -                               |
| GF0027515 | 1                             | 0                        | 0                            | 0 Hypothetical protein (1)                                    |                                                                                                                                                                                                                                                                                                                                                                                            |                                                                                                                                                                                                                                                               | scaffold_2_mRNA_3955.1           | -                           | -                               |
| GF0027514 | 1                             | 0                        | 0                            | 0 Hypothetical protein (1)                                    |                                                                                                                                                                                                                                                                                                                                                                                            |                                                                                                                                                                                                                                                               | scaffold_2_mRNA_3924.1           | -                           | -                               |
| GF0027513 | 1                             | 0                        | 0                            | 0 DNA/RNA polymerases superfamily protein (1)                 |                                                                                                                                                                                                                                                                                                                                                                                            |                                                                                                                                                                                                                                                               | scaffold_2_mRNA_3922.1           | -                           | -                               |
| GF0027512 | 1                             | 0                        | 0                            | 0 Leucine-rich repeat transmembrane protein kinase (1)        |                                                                                                                                                                                                                                                                                                                                                                                            | Leucine-rich repeat domain, L domain-like [IPR032675] (1); Maleicin [IPR021720] (1)                                                                                                                                                                           | scaffold_2_mRNA_3918.1           | -                           | -                               |
| GF0027511 | 1                             | 0                        | 0                            | 0 Hypothetical protein (1)                                    |                                                                                                                                                                                                                                                                                                                                                                                            |                                                                                                                                                                                                                                                               | scaffold_2_mRNA_3912.1           | -                           | -                               |
| GF0027510 | 1                             | 0                        | 0                            | 0 Hypothetical protein (1)                                    |                                                                                                                                                                                                                                                                                                                                                                                            |                                                                                                                                                                                                                                                               | scaffold_2_mRNA_3881.1           | -                           | -                               |
| GF0027509 | 1                             | 0                        | 0                            | 0 Hypothetical protein (1)                                    |                                                                                                                                                                                                                                                                                                                                                                                            |                                                                                                                                                                                                                                                               | scaffold_2_mRNA_3880.1           | -                           | -                               |
| GF0027508 | 1                             | 0                        | 0                            | 0 Hypothetical protein (1)                                    | aspartic-type endopeptidase activity [GO:004190 molecular_function] (1); proteolysis [GO:0006508 biological_process] (1)                                                                                                                                                                                                                                                                   | Retrotransposon gag domain [IPR005162] (1); Aspartic peptidase domain [IPR021109] (1); Peptidase-A2A, retroviral, catalytic [IPR001995] (1)                                                                                                                   | scaffold_2_mRNA_3879.1           | -                           | -                               |
| GF0027507 | 1                             | 0                        | 0                            | 0 Hypothetical protein (1)                                    |                                                                                                                                                                                                                                                                                                                                                                                            |                                                                                                                                                                                                                                                               | scaffold_2_mRNA_3878.1           | -                           | -                               |
| GF0027506 | 1                             | 0                        | 0                            | 0 Hypothetical protein (1)                                    | carbohydrate binding [GO:0030246 molecular_function] (1); carbohydrate metabolic process [GO:0005975 biological_process] (1); catalytic activity [GO:0003824 molecular_function] (1); hydrolase activity, hydrolyzing O-glycosyl compounds [GO:0004553 molecular_function] (1)                                                                                                             | Galactose mutarotase-like domain [IPR011013] (1); Glycoside hydrolase family 31 [IPR000322] (1)                                                                                                                                                               | scaffold_2_mRNA_3866.1           | -                           | -                               |
| GF0027505 | 1                             | 0                        | 0                            | 0 Hypothetical protein (1)                                    |                                                                                                                                                                                                                                                                                                                                                                                            | Retrosposon gag domain [IPR005162] (1)                                                                                                                                                                                                                        | scaffold_2_mRNA_3863.1           | -                           | -                               |
| GF0027504 | 1                             | 0                        | 0                            | 0 Hypothetical protein (1)                                    |                                                                                                                                                                                                                                                                                                                                                                                            |                                                                                                                                                                                                                                                               | scaffold_2_mRNA_3862.1           | -                           | -                               |
| GF0027503 | 1                             | 0                        | 0                            | 0 Hypothetical protein (1)                                    |                                                                                                                                                                                                                                                                                                                                                                                            | Leucine-rich repeat domain, L domain-like [IPR032675] (1)                                                                                                                                                                                                     | scaffold_2_mRNA_3858.1           | -                           | -                               |
| GF0027502 | 1                             | 0                        | 0                            | 0 Glutathione transferase (1)                                 |                                                                                                                                                                                                                                                                                                                                                                                            | Glutathione S-transferase, C-terminal-like [IPR010987] (1); Glutathione S-transferase (GST) [IPR01639] (1)                                                                                                                                                    | scaffold_2_mRNA_3856.1           | -                           | -                               |
| GF0027501 | 1                             | 0                        | 0                            | 0 Verticillium wilt resistance-like protein (1)               | protein binding [GO:0005515 molecular_function] (1)                                                                                                                                                                                                                                                                                                                                        | Leucine-rich repeat [IPR001611] (1); Leucine-rich repeat, typical subtype [IPR003591] (1); Leucine-rich repeat domain, L domain-like [IPR032675] (1)                                                                                                          | scaffold_2_mRNA_3840.1           | -                           | -                               |
| GF0027500 | 1                             | 0                        | 0                            | 0 Hypothetical protein (1)                                    | protein binding [GO:0005515 molecular_function] (1)                                                                                                                                                                                                                                                                                                                                        | Leucine-rich repeat [IPR001611] (1); Leucine-rich repeat domain, L domain-like [IPR032675] (1)                                                                                                                                                                | scaffold_2_mRNA_3839.1           | -                           | -                               |
| GF0027499 | 1                             | 0                        | 0                            | 0 Hypothetical protein (1)                                    |                                                                                                                                                                                                                                                                                                                                                                                            |                                                                                                                                                                                                                                                               | scaffold_2_mRNA_3835.1           | -                           | -                               |
| GF0027498 | 1                             | 0                        | 0                            | 0 Verticillium wilt disease resistance protein (1)            | protein binding [GO:0005515 molecular_function] (1)                                                                                                                                                                                                                                                                                                                                        | Leucine-rich repeat [IPR001611] (1); Leucine-rich repeat domain, L domain-like [IPR032675] (1); Leucine-rich repeat, typical subtype [IPR003591] (1)                                                                                                          | scaffold_2_mRNA_3831.1           | -                           | -                               |

| ID        | Num in <i>C. clementiae</i> | Num in <i>C. uchiha</i> | Num in <i>P. trifoliata</i> | Note                                                                | GO                                                                                                                                                                                                                                                                                                                                                     | InterPro                                                                                                                                                                                                                                                                                                                     | Members in <i>C. clementiae</i> | Members in <i>C. uchiha</i> | Members in <i>P. trifoliata</i> |
|-----------|-----------------------------|-------------------------|-----------------------------|---------------------------------------------------------------------|--------------------------------------------------------------------------------------------------------------------------------------------------------------------------------------------------------------------------------------------------------------------------------------------------------------------------------------------------------|------------------------------------------------------------------------------------------------------------------------------------------------------------------------------------------------------------------------------------------------------------------------------------------------------------------------------|---------------------------------|-----------------------------|---------------------------------|
| GF0027497 | 1                           | 0                       | 0                           | 0 Hypothetical protein (1)                                          | zinc ion binding [GO:0008270 molecular_function] (1); threonine-type endopeptidase activity [GO:0004298 molecular_function] (1); proteolysis involved in cellular protein catabolic process [GO:0051603 biological_process] (1); nucleic acid binding [GO:0003676 molecular_function] (1); proteasome core complex [GO:0005839 cellular_component] (1) | Zinc knuckle CX2CX4HX4C [IPRO25856] (1); Proteasome, subunit alpha/beta [IPRO01353] (1); Zinc finger, CCHC-type [IPRO01878] (1); Endonuclease/exonuclease/phosphatase [IPRO05135] (1); Nucleophilic aminohydrolases, N-terminal [IPRO20955] (1); Domain of unknown function DUF4283 [IPRO25558] (1)                          | scaffold_2_mRNA_3779.1          | -                           | -                               |
| GF0027496 | 1                           | 0                       | 0                           | 0 Hypothetical protein (1)                                          |                                                                                                                                                                                                                                                                                                                                                        |                                                                                                                                                                                                                                                                                                                              | scaffold_2_mRNA_371.1           | -                           | -                               |
| GF0027495 | 1                           | 0                       | 0                           | 0 Hypothetical protein (1)                                          |                                                                                                                                                                                                                                                                                                                                                        |                                                                                                                                                                                                                                                                                                                              | scaffold_2_mRNA_370.1           | -                           | -                               |
| GF0027494 | 1                           | 0                       | 0                           | 0 Hypothetical protein (1)                                          |                                                                                                                                                                                                                                                                                                                                                        |                                                                                                                                                                                                                                                                                                                              | scaffold_2_mRNA_3673.1          | -                           | -                               |
| GF0027493 | 1                           | 0                       | 0                           | 0 Hypothetical protein (1)                                          |                                                                                                                                                                                                                                                                                                                                                        | Retrotransposon gag domain [IPRO05162] (1)                                                                                                                                                                                                                                                                                   | scaffold_2_mRNA_3672.1          | -                           | -                               |
| GF0027492 | 1                           | 0                       | 0                           | 0 Hypothetical protein (1)                                          |                                                                                                                                                                                                                                                                                                                                                        |                                                                                                                                                                                                                                                                                                                              | scaffold_2_mRNA_3671.1          | -                           | -                               |
| GF0027491 | 1                           | 0                       | 0                           | 0 Hypothetical protein (1)                                          | protein dephosphorylation [GO:0006470 biological_process] (1); catalytic activity [GO:0003824 molecular_function] (1); protein serine/threonine phosphatase activity [GO:0004722 molecular_function] (1)                                                                                                                                               | PP2A-type phosphatase domain [IPRO01922] (1); Protein phosphatase 2C family [IPRO15655] (1)                                                                                                                                                                                                                                  | scaffold_2_mRNA_3666.1          | -                           | -                               |
| GF0027490 | 1                           | 0                       | 0                           | 0 Hypothetical protein (1)                                          |                                                                                                                                                                                                                                                                                                                                                        |                                                                                                                                                                                                                                                                                                                              | scaffold_2_mRNA_3641.1          | -                           | -                               |
| GF0027489 | 1                           | 0                       | 0                           | 0 Hypothetical protein (1)                                          |                                                                                                                                                                                                                                                                                                                                                        |                                                                                                                                                                                                                                                                                                                              | scaffold_2_mRNA_364.1           | -                           | -                               |
| GF0027488 | 1                           | 0                       | 0                           | 0 Receptor kinase (1)                                               | protein kinase activity [GO:0004672 molecular_function] (1); protein phosphorylation [GO:0006468 biological_process] (1); ATP binding [GO:0005524 molecular_function] (1); polysaccharide binding [GO:0030247 molecular_function] (1)                                                                                                                  | Protein kinase, ATP binding site [IPRO17441] (1); Serine-threonine/tyrosine-protein kinase, catalytic domain [IPRO01245] (1); Protein kinase-like domain [IPRO11009] (1); Wall-associated receptor kinase, galacturonan-binding domain [IPRO25287] (1)                                                                       | scaffold_2_mRNA_3630.1          | -                           | -                               |
| GF0027487 | 1                           | 0                       | 0                           | 0 Monosaccharide transport protein (1)                              |                                                                                                                                                                                                                                                                                                                                                        |                                                                                                                                                                                                                                                                                                                              | scaffold_2_mRNA_3628.1          | -                           | -                               |
| GF0027486 | 1                           | 0                       | 0                           | 0 Hypothetical protein (1)                                          |                                                                                                                                                                                                                                                                                                                                                        | Aspartic peptidase domain [IPRO21109] (1)                                                                                                                                                                                                                                                                                    | scaffold_2_mRNA_3627.1          | -                           | -                               |
| GF0027485 | 1                           | 0                       | 0                           | 0 Hypothetical protein (1)                                          | protein kinase activity [GO:0004672 molecular_function] (1); protein phosphorylation [GO:0006468 biological_process] (1); ATP binding [GO:0005524 molecular_function] (1)                                                                                                                                                                              | Protein kinase-like domain [IPRO11009] (1); Protein kinase domain [IPRO00719] (1); Protein kinase, ATP binding site [IPRO17441] (1); Wall-associated receptor kinase, C-terminal [IPRO12872] (1)                                                                                                                             | scaffold_2_mRNA_3623.1          | -                           | -                               |
| GF0027484 | 1                           | 0                       | 0                           | 0 Hypothetical protein (1)                                          |                                                                                                                                                                                                                                                                                                                                                        |                                                                                                                                                                                                                                                                                                                              | scaffold_2_mRNA_3622.1          | -                           | -                               |
| GF0027483 | 1                           | 0                       | 0                           | 0 Hypothetical protein (1)                                          |                                                                                                                                                                                                                                                                                                                                                        |                                                                                                                                                                                                                                                                                                                              | scaffold_2_mRNA_3621.1          | -                           | -                               |
| GF0027482 | 1                           | 0                       | 0                           | 0 Hypothetical protein (1)                                          |                                                                                                                                                                                                                                                                                                                                                        |                                                                                                                                                                                                                                                                                                                              | scaffold_2_mRNA_3620.1          | -                           | -                               |
| GF0027481 | 1                           | 0                       | 0                           | 0 Hypothetical protein (1)                                          | sigma factor antagonist activity [GO:0016989 molecular_function] (1)                                                                                                                                                                                                                                                                                   | Anti sigma-E protein RseA, N-terminal [IPRO05572] (1)                                                                                                                                                                                                                                                                        | scaffold_2_mRNA_3619.1          | -                           | -                               |
| GF0027480 | 1                           | 0                       | 0                           | 0 Hypothetical protein (1)                                          |                                                                                                                                                                                                                                                                                                                                                        |                                                                                                                                                                                                                                                                                                                              | scaffold_2_mRNA_3618.1          | -                           | -                               |
| GF0027479 | 1                           | 0                       | 0                           | 0 Hypothetical protein (1)                                          | polysaccharide binding [GO:0030247 molecular_function] (1); protein phosphorylation [GO:0006468 biological_process] (1); protein kinase activity [GO:0004672 molecular_function] (1); zinc ion binding [GO:0008270 molecular_function] (1)                                                                                                             | Serine-threonine/tyrosine-protein kinase, catalytic domain [IPRO01245] (1); Protein kinase-like domain [IPRO11009] (1); Wall-associated receptor kinase, galacturonan-binding domain [IPRO25287] (1); Zinc finger, SWIM-type [IPRO07527] (1); MULE transposase domain [IPRO18289] (1); Zinc finger, PMZ-type [IPRO06564] (1) | scaffold_2_mRNA_3614.1          | -                           | -                               |
| GF0027478 | 1                           | 0                       | 0                           | 0 Hypothetical protein (1)                                          |                                                                                                                                                                                                                                                                                                                                                        |                                                                                                                                                                                                                                                                                                                              | scaffold_2_mRNA_3613.1          | -                           | -                               |
| GF0027477 | 1                           | 0                       | 0                           | 0 Hypothetical protein (1)                                          |                                                                                                                                                                                                                                                                                                                                                        |                                                                                                                                                                                                                                                                                                                              | scaffold_2_mRNA_3612.1          | -                           | -                               |
| GF0027476 | 1                           | 0                       | 0                           | 0 Hypothetical protein (1)                                          | polysaccharide binding [GO:0030247 molecular_function] (1)                                                                                                                                                                                                                                                                                             | Wall-associated receptor kinase, galacturonan-binding domain [IPRO25287] (1); Aspartic peptidase domain [IPRO21109] (1)                                                                                                                                                                                                      | scaffold_2_mRNA_3610.1          | -                           | -                               |
| GF0027475 | 1                           | 0                       | 0                           | 0 Hypothetical protein (1)                                          |                                                                                                                                                                                                                                                                                                                                                        |                                                                                                                                                                                                                                                                                                                              | scaffold_2_mRNA_3606.1          | -                           | -                               |
| GF0027474 | 1                           | 0                       | 0                           | 0 Hypothetical protein (1)                                          |                                                                                                                                                                                                                                                                                                                                                        |                                                                                                                                                                                                                                                                                                                              | scaffold_2_mRNA_3605.1          | -                           | -                               |
| GF0027473 | 1                           | 0                       | 0                           | 0 Hypothetical protein (1)                                          |                                                                                                                                                                                                                                                                                                                                                        |                                                                                                                                                                                                                                                                                                                              | scaffold_2_mRNA_3604.1          | -                           | -                               |
| GF0027472 | 1                           | 0                       | 0                           | 0 Hypothetical protein (1)                                          |                                                                                                                                                                                                                                                                                                                                                        |                                                                                                                                                                                                                                                                                                                              | scaffold_2_mRNA_3601.1          | -                           | -                               |
| GF0027471 | 1                           | 0                       | 0                           | 0 Hypothetical protein (1)                                          |                                                                                                                                                                                                                                                                                                                                                        |                                                                                                                                                                                                                                                                                                                              | scaffold_2_mRNA_3596.1          | -                           | -                               |
| GF0027470 | 1                           | 0                       | 0                           | 0 Hypothetical protein (1)                                          |                                                                                                                                                                                                                                                                                                                                                        |                                                                                                                                                                                                                                                                                                                              | scaffold_2_mRNA_3594.1          | -                           | -                               |
| GF0027469 | 1                           | 0                       | 0                           | 0 Cytokinin riboside 5'-monophosphate phosphoribosyltransferase (1) |                                                                                                                                                                                                                                                                                                                                                        |                                                                                                                                                                                                                                                                                                                              | scaffold_2_mRNA_3593.1          | -                           | -                               |
| GF0027468 | 1                           | 0                       | 0                           | 0 Hypothetical protein (1)                                          | protein phosphorylation [GO:0006468 biological_process] (1); protein kinase activity [GO:0004672 molecular_function] (1); ATP binding [GO:0005524 molecular_function] (1); polysaccharide binding [GO:0030247 molecular_function] (1)                                                                                                                  | Protein kinase domain [IPRO00719] (1); Protein kinase-like domain [IPRO11009] (1); Wall-associated receptor kinase, galacturonan-binding domain [IPRO25287] (1); Serine/threonine-protein kinase, active site [IPRO08271] (1)                                                                                                | scaffold_2_mRNA_3592.1          | -                           | -                               |
| GF0027467 | 1                           | 0                       | 0                           | 0 PRS-like receptor kinase (1)                                      | ATP binding [GO:0005524 molecular_function] (1); protein phosphorylation [GO:0006468 biological_process] (1); protein kinase activity [GO:0004672 molecular_function] (1)                                                                                                                                                                              | Protein kinase-like domain [IPRO11009] (1); Protein kinase domain [IPRO00719] (1); Serine/threonine-protein kinase, active site [IPRO08271] (1)                                                                                                                                                                              | scaffold_2_mRNA_3591.1          | -                           | -                               |
| GF0027466 | 1                           | 0                       | 0                           | 0 Hypothetical protein (1)                                          |                                                                                                                                                                                                                                                                                                                                                        |                                                                                                                                                                                                                                                                                                                              | scaffold_2_mRNA_3590.1          | -                           | -                               |
| GF0027465 | 1                           | 0                       | 0                           | 0 Hypothetical protein (1)                                          |                                                                                                                                                                                                                                                                                                                                                        |                                                                                                                                                                                                                                                                                                                              | scaffold_2_mRNA_359.1           | -                           | -                               |
| GF0027464 | 1                           | 0                       | 0                           | 0 Hypothetical protein (1)                                          | polysaccharide binding [GO:0030247 molecular_function] (1)                                                                                                                                                                                                                                                                                             | Wall-associated receptor kinase, galacturonan-binding domain [IPRO25287] (1)                                                                                                                                                                                                                                                 | scaffold_2_mRNA_3589.1          | -                           | -                               |
| GF0027463 | 1                           | 0                       | 0                           | 0 Hypothetical protein (1)                                          | transmembrane transport [GO:0005208 biological_process] (1); antiporter activity [GO:0015297 molecular_function] (1); drug transmembrane transporter activity [GO:0015238 molecular_function] (1); membrane [GO:0016020 cellular_component] (1); drug transmembrane transport [GO:0006855 biological_process] (1)                                      | Multi antimicrobial extrusion protein [IPRO2528] (1)                                                                                                                                                                                                                                                                         | scaffold_2_mRNA_3577.1          | -                           | -                               |
| GF0027462 | 1                           | 0                       | 0                           | 0 Hypothetical protein (1)                                          | cytoplasm [GO:0005737 cellular_component] (1); protein folding [GO:0006457 biological_process] (1)                                                                                                                                                                                                                                                     | GroES-like [IPRO11032] (1); GroES chaperonin family [IPRO20818] (1)                                                                                                                                                                                                                                                          | scaffold_2_mRNA_3525.1          | -                           | -                               |
| GF0027461 | 1                           | 0                       | 0                           | 0 Hypothetical protein (1)                                          |                                                                                                                                                                                                                                                                                                                                                        |                                                                                                                                                                                                                                                                                                                              | scaffold_2_mRNA_3523.1          | -                           | -                               |
| GF0027460 | 1                           | 0                       | 0                           | 0 Hypothetical protein (1)                                          | zinc ion binding [GO:0008270 molecular_function] (1); nucleic acid binding [GO:0003676 molecular_function] (1)                                                                                                                                                                                                                                         | Zinc finger, SWIM-type [IPRO07527] (1); Zinc finger, PMZ-type [IPRO06564] (1); Zinc finger, CCHC-type [IPRO01878] (1)                                                                                                                                                                                                        | scaffold_2_mRNA_3519.1          | -                           | -                               |
| GF0027459 | 1                           | 0                       | 0                           | 0 Hypothetical protein (1)                                          | cysteine-type peptidase activity [GO:0008234 molecular_function] (1); proteolysis [GO:0006508 biological_process] (1)                                                                                                                                                                                                                                  | Upl1 protease family, C-terminal catalytic domain [IPRO03653] (1)                                                                                                                                                                                                                                                            | scaffold_2_mRNA_3506.1          | -                           | -                               |
| GF0027458 | 1                           | 0                       | 0                           | 0 Hypothetical protein (1)                                          | response to biotic stimulus [GO:0009607 biological_process] (1); defense response [GO:0006952 biological_process] (1)                                                                                                                                                                                                                                  | Bet v I/MAJOR latex protein [IPRO00916] (1); START-like domain [IPRO23393] (1)                                                                                                                                                                                                                                               | scaffold_2_mRNA_3505.1          | -                           | -                               |
| GF0027457 | 1                           | 0                       | 0                           | 0 Hypothetical protein (1)                                          |                                                                                                                                                                                                                                                                                                                                                        |                                                                                                                                                                                                                                                                                                                              | scaffold_2_mRNA_3485.1          | -                           | -                               |
| GF0027456 | 1                           | 0                       | 0                           | 0 Hypothetical protein (1)                                          |                                                                                                                                                                                                                                                                                                                                                        |                                                                                                                                                                                                                                                                                                                              | scaffold_2_mRNA_3482.1          | -                           | -                               |
| GF0027455 | 1                           | 0                       | 0                           | 0 Hypothetical protein (1)                                          | carbohydrate metabolic process [GO:0005975 biological_process] (1); hydrolase activity, hydrolyzing O-glycosyl compounds [GO:0004553 molecular_function] (1)                                                                                                                                                                                           | Glycoside hydrolase superfamily [IPRO17853] (1); Glycoside hydrolase family 17 [IPRO00090] (1); Reverse transcriptase domain [IPRO04077] (1); X8 domain [IPRO12946] (1); Endonuclease/exonuclease/phosphatase [IPRO05135] (1)                                                                                                | scaffold_2_mRNA_3475.1          | -                           | -                               |
| GF0027454 | 1                           | 0                       | 0                           | 0 Hypothetical protein (1)                                          |                                                                                                                                                                                                                                                                                                                                                        |                                                                                                                                                                                                                                                                                                                              | scaffold_2_mRNA_3467.1          | -                           | -                               |
| GF0027453 | 1                           | 0                       | 0                           | 0 Hypothetical protein (1)                                          | ubiquitin protein ligase binding [GO:001625 molecular_function] (1); ubiquitin-dependent protein catabolic process [GO:0006511 biological_process] (1)                                                                                                                                                                                                 | Winged helix-helix-DNA-binding domain [IPRO11991] (1); Cullin homology [IPRO16158] (1); Cullin, N-terminal [IPRO01373] (1)                                                                                                                                                                                                   | scaffold_2_mRNA_3460.1          | -                           | -                               |
| GF0027452 | 1                           | 0                       | 0                           | 0 Hypothetical protein (1)                                          |                                                                                                                                                                                                                                                                                                                                                        |                                                                                                                                                                                                                                                                                                                              | scaffold_2_mRNA_3456.1          | -                           | -                               |
| GF0027451 | 1                           | 0                       | 0                           | 0 Hypothetical protein (1)                                          |                                                                                                                                                                                                                                                                                                                                                        |                                                                                                                                                                                                                                                                                                                              | scaffold_2_mRNA_3455.1          | -                           | -                               |
| GF0027450 | 1                           | 0                       | 0                           | 0 Hypothetical protein (1)                                          |                                                                                                                                                                                                                                                                                                                                                        |                                                                                                                                                                                                                                                                                                                              | scaffold_2_mRNA_3440.1          | -                           | -                               |
| GF0027449 | 1                           | 0                       | 0                           | 0 Hypothetical protein (1)                                          | DNA binding [GO:0003677 molecular_function] (1); DNA repair [GO:0006291 biological_process] (1); DNA recombination [GO:0006310 biological_process] (1); DNA ligase (ATP) activity [GO:0003910 molecular_function] (1)                                                                                                                                  | DNA ligase, ATP-dependent, N-terminal [IPRO12308] (1)                                                                                                                                                                                                                                                                        | scaffold_2_mRNA_3438.1          | -                           | -                               |
| GF0027448 | 1                           | 0                       | 0                           | 0 Hypothetical protein (1)                                          |                                                                                                                                                                                                                                                                                                                                                        |                                                                                                                                                                                                                                                                                                                              | scaffold_2_mRNA_3437.1          | -                           | -                               |
| GF0027447 | 1                           | 0                       | 0                           | 0 Hypothetical protein (1)                                          | cysteine-type peptidase activity [GO:0008234 molecular_function] (1); proteolysis [GO:0006508 biological_process] (1)                                                                                                                                                                                                                                  | Domain of unknown function DUF1985 [IPRO15410] (1); Upl1 protease family, C-terminal catalytic domain [IPRO03653] (1)                                                                                                                                                                                                        | scaffold_2_mRNA_3423.1          | -                           | -                               |

| ID        | Num. in <i>C. clementiae</i> | Num. in <i>C. uchiha</i> | Num. in <i>P. trifoliata</i> | Note                                                         | GO                                                                                                                                                                                                                               | InterPro                                                                                                                                                                                                                                                                                                                    | Members in <i>C. clementiae</i> | Members in <i>C. uchiha</i> | Members in <i>P. trifoliata</i> |
|-----------|------------------------------|--------------------------|------------------------------|--------------------------------------------------------------|----------------------------------------------------------------------------------------------------------------------------------------------------------------------------------------------------------------------------------|-----------------------------------------------------------------------------------------------------------------------------------------------------------------------------------------------------------------------------------------------------------------------------------------------------------------------------|---------------------------------|-----------------------------|---------------------------------|
| GF0027446 | 1                            | 0                        | 0                            | Transposable element protein, putative, (1)                  |                                                                                                                                                                                                                                  | LOG family [IPRO31100] (1); Retrotransposon gag domain [IPRO05162] (1)                                                                                                                                                                                                                                                      | scaffold_2_mRNA_3422.1          | -                           | -                               |
| GF0027445 | 1                            | 0                        | 0                            | Hypothetical protein (1)                                     |                                                                                                                                                                                                                                  | Retrotransposon gag domain [IPRO05162] (1)                                                                                                                                                                                                                                                                                  | scaffold_2_mRNA_3416.1          | -                           | -                               |
| GF0027444 | 1                            | 0                        | 0                            | Hypothetical protein (1)                                     |                                                                                                                                                                                                                                  | Ribonuclease H-like domain [IPRO12337] (1)                                                                                                                                                                                                                                                                                  | scaffold_2_mRNA_3404.1          | -                           | -                               |
| GF0027443 | 1                            | 0                        | 0                            | Hypothetical protein (1)                                     | nucleic acid binding [GO:0003676 molecular_function] (1)                                                                                                                                                                         | Ribonuclease H-like domain [IPRO12337] (1)                                                                                                                                                                                                                                                                                  | scaffold_2_mRNA_3402.1          | -                           | -                               |
| GF0027442 | 1                            | 0                        | 0                            | Putative receptor protein kinase TMK1 (1)                    | protein kinase activity [GO:0004672 molecular_function] (1); protein phosphorylation [GO:0006468 biological_process] (1); ATP binding [GO:0005524 molecular_function] (1)                                                        | Protein kinase-like domain [IPRO11009] (1); Protein kinase domain [IPRO00719] (1); Serine-threonine/tyrosine-protein kinase, catalytic domain [IPRO01245] (1)                                                                                                                                                               | scaffold_2_mRNA_3397.1          | -                           | -                               |
| GF0027441 | 1                            | 0                        | 0                            | Hypothetical protein (1)                                     |                                                                                                                                                                                                                                  |                                                                                                                                                                                                                                                                                                                             | scaffold_2_mRNA_339.1           | -                           | -                               |
| GF0027440 | 1                            | 0                        | 0                            | Transmembrane ascorbate ferredoxinase (1)                    |                                                                                                                                                                                                                                  | Cytochrome b561/ferredoxin reductase transmembrane [IPRO06593] (1)                                                                                                                                                                                                                                                          | scaffold_2_mRNA_3389.1          | -                           | -                               |
| GF0027439 | 1                            | 0                        | 0                            | Monosaccharide transport protein (1)                         |                                                                                                                                                                                                                                  |                                                                                                                                                                                                                                                                                                                             | scaffold_2_mRNA_337.1           | -                           | -                               |
| GF0027438 | 1                            | 0                        | 0                            | Hypothetical protein (1)                                     |                                                                                                                                                                                                                                  |                                                                                                                                                                                                                                                                                                                             | scaffold_2_mRNA_3367.1          | -                           | -                               |
| GF0027437 | 1                            | 0                        | 0                            | Hypothetical protein (1)                                     | integral component of membrane [GO:0016021 cellular_component] (1)                                                                                                                                                               | Nonspanin (TM9SF) [IPRO04240] (1)                                                                                                                                                                                                                                                                                           | scaffold_2_mRNA_3353.1          | -                           | -                               |
| GF0027436 | 1                            | 0                        | 0                            | Cytokinin riboside 5'-monophosphate phosphoribohydrolase (1) |                                                                                                                                                                                                                                  | LOG family [IPRO31100] (1)                                                                                                                                                                                                                                                                                                  | scaffold_2_mRNA_3352.1          | -                           | -                               |
| GF0027435 | 1                            | 0                        | 0                            | Hypothetical protein (1)                                     |                                                                                                                                                                                                                                  |                                                                                                                                                                                                                                                                                                                             | scaffold_2_mRNA_3351.1          | -                           | -                               |
| GF0027434 | 1                            | 0                        | 0                            | Hypothetical protein (1)                                     |                                                                                                                                                                                                                                  |                                                                                                                                                                                                                                                                                                                             | scaffold_2_mRNA_3347.1          | -                           | -                               |
| GF0027433 | 1                            | 0                        | 0                            | Hypothetical protein (1)                                     |                                                                                                                                                                                                                                  |                                                                                                                                                                                                                                                                                                                             | scaffold_2_mRNA_3346.1          | -                           | -                               |
| GF0027432 | 1                            | 0                        | 0                            | Hypothetical protein (1)                                     |                                                                                                                                                                                                                                  |                                                                                                                                                                                                                                                                                                                             | scaffold_2_mRNA_3339.1          | -                           | -                               |
| GF0027431 | 1                            | 0                        | 0                            | Hypothetical protein (1)                                     |                                                                                                                                                                                                                                  | Aspartic peptidase domain [IPRO21109] (1)                                                                                                                                                                                                                                                                                   | scaffold_2_mRNA_3316.1          | -                           | -                               |
| GF0027430 | 1                            | 0                        | 0                            | Hypothetical protein (1)                                     | zinc ion binding [GO:0008270 molecular_function] (1); ubiquinone biosynthetic process [GO:0006744 biological_process] (1); 2-pyrenyl-6-methoxy-1,4-benzoxiquinone methyltransferase activity [GO:0008425 molecular_function] (1) | S-adenosyl-L-methionine-dependent methyltransferase [IPRO2963] (1); Zinc finger, SWIM-type [IPRO07527] (1); Ubiquinone biosynthesis O-methyltransferase [IPRO10233] (1); Transposase, MuIR, plant [IPRO04332] (1); Zinc finger, PMZ-type [IPRO06564] (1); MULE transposase domain [IPRO18299] (1)                           | scaffold_2_mRNA_3312.1          | -                           | -                               |
| GF0027429 | 1                            | 0                        | 0                            | Hypothetical protein (1)                                     |                                                                                                                                                                                                                                  | Domain of unknown function DUF4219 [IPRO25314] (1)                                                                                                                                                                                                                                                                          | scaffold_2_mRNA_331.1           | -                           | -                               |
| GF0027428 | 1                            | 0                        | 0                            | Hypothetical protein (1)                                     |                                                                                                                                                                                                                                  |                                                                                                                                                                                                                                                                                                                             | scaffold_2_mRNA_3294.1          | -                           | -                               |
| GF0027427 | 1                            | 0                        | 0                            | Hypothetical protein (1)                                     |                                                                                                                                                                                                                                  |                                                                                                                                                                                                                                                                                                                             | scaffold_2_mRNA_3285.1          | -                           | -                               |
| GF0027426 | 1                            | 0                        | 0                            | Hypothetical protein (1)                                     |                                                                                                                                                                                                                                  |                                                                                                                                                                                                                                                                                                                             | scaffold_2_mRNA_3282.1          | -                           | -                               |
| GF0027425 | 1                            | 0                        | 0                            | Hypothetical protein (1)                                     |                                                                                                                                                                                                                                  |                                                                                                                                                                                                                                                                                                                             | scaffold_2_mRNA_3281.1          | -                           | -                               |
| GF0027424 | 1                            | 0                        | 0                            | Hypothetical protein (1)                                     |                                                                                                                                                                                                                                  |                                                                                                                                                                                                                                                                                                                             | scaffold_2_mRNA_3280.1          | -                           | -                               |
| GF0027423 | 1                            | 0                        | 0                            | Hypothetical protein (1)                                     |                                                                                                                                                                                                                                  |                                                                                                                                                                                                                                                                                                                             | scaffold_2_mRNA_3277.1          | -                           | -                               |
| GF0027422 | 1                            | 0                        | 0                            | Hypothetical protein (1)                                     |                                                                                                                                                                                                                                  |                                                                                                                                                                                                                                                                                                                             | scaffold_2_mRNA_3261.1          | -                           | -                               |
| GF0027421 | 1                            | 0                        | 0                            | Cytokinin riboside 5'-monophosphate phosphoribohydrolase (1) |                                                                                                                                                                                                                                  | LOG family [IPRO31100] (1)                                                                                                                                                                                                                                                                                                  | scaffold_2_mRNA_326.1           | -                           | -                               |
| GF0027420 | 1                            | 0                        | 0                            | Cytokinin riboside 5'-monophosphate phosphoribohydrolase (1) |                                                                                                                                                                                                                                  | Cytokinin riboside 5'-monophosphate phosphoribohydrolase LOG [IPRO05269] (1); LOG family [IPRO31100] (1)                                                                                                                                                                                                                    | scaffold_2_mRNA_3255.1          | -                           | -                               |
| GF0027419 | 1                            | 0                        | 0                            | Hypothetical protein (1)                                     |                                                                                                                                                                                                                                  |                                                                                                                                                                                                                                                                                                                             | scaffold_2_mRNA_3254.1          | -                           | -                               |
| GF0027418 | 1                            | 0                        | 0                            | Hypothetical protein (1)                                     |                                                                                                                                                                                                                                  |                                                                                                                                                                                                                                                                                                                             | scaffold_2_mRNA_3253.1          | -                           | -                               |
| GF0027417 | 1                            | 0                        | 0                            | Hypothetical protein (1)                                     |                                                                                                                                                                                                                                  |                                                                                                                                                                                                                                                                                                                             | scaffold_2_mRNA_3242.1          | -                           | -                               |
| GF0027416 | 1                            | 0                        | 0                            | Hypothetical protein (1)                                     |                                                                                                                                                                                                                                  |                                                                                                                                                                                                                                                                                                                             | scaffold_2_mRNA_3241.1          | -                           | -                               |
| GF0027415 | 1                            | 0                        | 0                            | Hypothetical protein (1)                                     |                                                                                                                                                                                                                                  |                                                                                                                                                                                                                                                                                                                             | scaffold_2_mRNA_3239.1          | -                           | -                               |
| GF0027414 | 1                            | 0                        | 0                            | Hypothetical protein (1)                                     | metabolic process [GO:0008152 biological_process] (1); transferase activity, transferring hexosyl groups [GO:0016758 molecular_function] (1)                                                                                     | GAG-pro-integrase domain [IPRO25724] (1); UDP-glucuronosylUDP-glucosyltransferase [IPRO02213] (1)                                                                                                                                                                                                                           | scaffold_2_mRNA_3227.1          | -                           | -                               |
| GF0027413 | 1                            | 0                        | 0                            | UDP-glucosyltransferase 74E2 (1)                             | transferase activity, transferring hexosyl groups [GO:0016758 molecular_function] (1); metabolic process [GO:0008152 biological_process] (1)                                                                                     | UDP-glucuronosylUDP-glucosyltransferase [IPRO02213] (1)                                                                                                                                                                                                                                                                     | scaffold_2_mRNA_3221.1          | -                           | -                               |
| GF0027412 | 1                            | 0                        | 0                            | Hypothetical protein (1)                                     | transferase activity, transferring hexosyl groups [GO:0016758 molecular_function] (1); metabolic process [GO:0008152 biological_process] (1)                                                                                     | UDP-glucuronosylUDP-glucosyltransferase [IPRO02213] (1)                                                                                                                                                                                                                                                                     | scaffold_2_mRNA_3220.1          | -                           | -                               |
| GF0027411 | 1                            | 0                        | 0                            | Hypothetical protein (1)                                     | metabolic process [GO:0008152 biological_process] (1); transferase activity, transferring hexosyl groups [GO:0016758 molecular_function] (1)                                                                                     | UDP-glucuronosylUDP-glucosyltransferase [IPRO02213] (1); Endonuclease/exonuclease/phosphatase [IPRO05135] (1)                                                                                                                                                                                                               | scaffold_2_mRNA_3216.1          | -                           | -                               |
| GF0027410 | 1                            | 0                        | 0                            | Hypothetical protein (1)                                     |                                                                                                                                                                                                                                  |                                                                                                                                                                                                                                                                                                                             | scaffold_2_mRNA_321.1           | -                           | -                               |
| GF0027409 | 1                            | 0                        | 0                            | Hypothetical protein (1)                                     |                                                                                                                                                                                                                                  |                                                                                                                                                                                                                                                                                                                             | scaffold_2_mRNA_3203.1          | -                           | -                               |
| GF0027408 | 1                            | 0                        | 0                            | Hypothetical protein (1)                                     |                                                                                                                                                                                                                                  |                                                                                                                                                                                                                                                                                                                             | scaffold_2_mRNA_320.1           | -                           | -                               |
| GF0027407 | 1                            | 0                        | 0                            | Putative auxin-induced in root cultures protein 12-like (1)  |                                                                                                                                                                                                                                  | Cytochrome b561/ferredoxin reductase transmembrane [IPRO06593] (1)                                                                                                                                                                                                                                                          | scaffold_2_mRNA_3196.1          | -                           | -                               |
| GF0027406 | 1                            | 0                        | 0                            | ATP-dependent RNA helicase (1)                               | ATP binding [GO:0005524 molecular_function] (1); nucleic acid binding [GO:0003676 molecular_function] (1); ATP-dependent helicase activity [GO:0008026 molecular_function] (1)                                                   | Helicase, C-terminal [IPRO1650] (1); P-loop containing nucleoside triphosphate hydrolase [IPRO2747] (1); DNA/RNA helicase, ATP-dependent, DEAH-box type, conserved site [IPRO02464] (1); Helicase superfamily 1/2, ATP-binding domain [IPRO14001] (1)                                                                       | scaffold_2_mRNA_3178.1          | -                           | -                               |
| GF0027405 | 1                            | 0                        | 0                            | Hypothetical protein (1)                                     |                                                                                                                                                                                                                                  | Zinc finger, FYVE/PHD-type [IPRO11011] (1); Zinc finger, PHD-type, conserved site [IPRO19786] (1); Zinc finger, RING-FYVE/PHD-type [IPRO13083] (1)                                                                                                                                                                          | scaffold_2_mRNA_3175.1          | -                           | -                               |
| GF0027404 | 1                            | 0                        | 0                            | Hypothetical protein (1)                                     |                                                                                                                                                                                                                                  |                                                                                                                                                                                                                                                                                                                             | scaffold_2_mRNA_3173.1          | -                           | -                               |
| GF0027403 | 1                            | 0                        | 0                            | Hypothetical protein (1)                                     |                                                                                                                                                                                                                                  |                                                                                                                                                                                                                                                                                                                             | scaffold_2_mRNA_3172.1          | -                           | -                               |
| GF0027402 | 1                            | 0                        | 0                            | Cytokinin riboside 5'-monophosphate phosphoribohydrolase (1) |                                                                                                                                                                                                                                  |                                                                                                                                                                                                                                                                                                                             | scaffold_2_mRNA_317.1           | -                           | -                               |
| GF0027401 | 1                            | 0                        | 0                            | Hypothetical protein (1)                                     | DNA integration [GO:0015074 biological_process] (1); nucleic acid binding [GO:0003676 molecular_function] (1)                                                                                                                    | Integrase, catalytic core [IPRO01584] (1); Ribonuclease H-like domain [IPRO12337] (1)                                                                                                                                                                                                                                       | scaffold_2_mRNA_3169.1          | -                           | -                               |
| GF0027400 | 1                            | 0                        | 0                            | Hypothetical protein (1)                                     |                                                                                                                                                                                                                                  |                                                                                                                                                                                                                                                                                                                             | scaffold_2_mRNA_3166.1          | -                           | -                               |
| GF0027399 | 1                            | 0                        | 0                            | Hypothetical protein (1)                                     |                                                                                                                                                                                                                                  | Reverse transcriptase zinc-binding domain [IPRO26960] (1)                                                                                                                                                                                                                                                                   | scaffold_2_mRNA_3165.1          | -                           | -                               |
| GF0027398 | 1                            | 0                        | 0                            | Hypothetical protein (1)                                     |                                                                                                                                                                                                                                  |                                                                                                                                                                                                                                                                                                                             | scaffold_2_mRNA_3164.1          | -                           | -                               |
| GF0027397 | 1                            | 0                        | 0                            | Hypothetical protein (1)                                     |                                                                                                                                                                                                                                  |                                                                                                                                                                                                                                                                                                                             | scaffold_2_mRNA_316.1           | -                           | -                               |
| GF0027396 | 1                            | 0                        | 0                            | Hypothetical protein (1)                                     |                                                                                                                                                                                                                                  | Transposase-associated domain [IPRO29480] (1)                                                                                                                                                                                                                                                                               | scaffold_2_mRNA_3158.1          | -                           | -                               |
| GF0027395 | 1                            | 0                        | 0                            | Exostosin family protein (1)                                 |                                                                                                                                                                                                                                  | Exostosin-like [IPRO04263] (1); Domain of unknown function DUF2431 [IPRO19446] (1)                                                                                                                                                                                                                                          | scaffold_2_mRNA_3131.1          | -                           | -                               |
| GF0027394 | 1                            | 0                        | 0                            | Hypothetical protein (1)                                     |                                                                                                                                                                                                                                  |                                                                                                                                                                                                                                                                                                                             | scaffold_2_mRNA_312.1           | -                           | -                               |
| GF0027393 | 1                            | 0                        | 0                            | Hypothetical protein (1)                                     |                                                                                                                                                                                                                                  |                                                                                                                                                                                                                                                                                                                             | scaffold_2_mRNA_3112.1          | -                           | -                               |
| GF0027392 | 1                            | 0                        | 0                            | Hypothetical protein (1)                                     | nucleic acid binding [GO:0003676 molecular_function] (1); DNA binding [GO:0003677 molecular_function] (1)                                                                                                                        | Zinc finger C2H2-type [IPRO13087] (1); Zinc finger, BED-type [IPRO03656] (1)                                                                                                                                                                                                                                                | scaffold_2_mRNA_3107.1          | -                           | -                               |
| GF0027391 | 1                            | 0                        | 0                            | Ulp1 protease family, carboxy-terminal domain protein (1)    | cysteine-type peptidase activity [GO:0008234 molecular_function] (1); proteolysis [GO:0006508 biological_process] (1)                                                                                                            | Ulp1 protease family, C-terminal catalytic domain [IPRO03653] (1)                                                                                                                                                                                                                                                           | scaffold_2_mRNA_3093.1          | -                           | -                               |
| GF0027390 | 1                            | 0                        | 0                            | Salicylate O-methyltransferase (1)                           | methyltransferase activity [GO:0008168 molecular_function] (1)                                                                                                                                                                   | SAM dependent carboxyl methyltransferase [IPRO05299] (1); S-adenosyl-L-methionine-dependent methyltransferase [IPRO29063] (1)                                                                                                                                                                                               | scaffold_2_mRNA_3090.1          | -                           | -                               |
| GF0027389 | 1                            | 0                        | 0                            | Hypothetical protein (1)                                     |                                                                                                                                                                                                                                  |                                                                                                                                                                                                                                                                                                                             | scaffold_2_mRNA_3081.1          | -                           | -                               |
| GF0027388 | 1                            | 0                        | 0                            | Receptor like protein 33 (1)                                 | protein binding [GO:0005515 molecular_function] (1)                                                                                                                                                                              | Leucine-rich repeat, typical subtype [IPRO03591] (1); Leucine-rich repeat domain, L domain-like [IPRO32675] (1); Leucine-rich repeat-containing N-terminal, plant-type [IPRO13210] (1); Leucine-rich repeat [IPRO01611] (1)                                                                                                 | scaffold_2_mRNA_3075.1          | -                           | -                               |
| GF0027387 | 1                            | 0                        | 0                            | Hypothetical protein (1)                                     | protein binding [GO:0005515 molecular_function] (1)                                                                                                                                                                              | Leucine-rich repeat domain, L domain-like [IPRO32675] (1); Leucine-rich repeat [IPRO01611] (1); Leucine-rich repeat [IPRO01611] (1); Leucine-rich repeat-containing N-terminal, plant-type [IPRO13210] (1); Leucine-rich repeat domain, L domain-like [IPRO32675] (1); Leucine-rich repeat, typical subtype [IPRO03591] (1) | scaffold_2_mRNA_3074.1          | -                           | -                               |
| GF0027386 | 1                            | 0                        | 0                            | Verticillium wilt resistance-like protein (1)                | protein binding [GO:0005515 molecular_function] (1)                                                                                                                                                                              | Leucine-rich repeat domain, L domain-like [IPRO32675] (1); Leucine-rich repeat, typical subtype [IPRO03591] (1)                                                                                                                                                                                                             | scaffold_2_mRNA_3073.1          | -                           | -                               |

| ID        | Num. in <i>C. clementinae</i> | Num. in <i>C. uchiha</i> | Num. in <i>P. trifoliata</i> | Note                                                           | GO                                                                                                                                                                                                                                                                                                                                                                    | InterPro                                                                                                                                                                                                                                                                                | Members in <i>C. clementinae</i> | Members in <i>C. uchiha</i> | Members in <i>P. trifoliata</i> |
|-----------|-------------------------------|--------------------------|------------------------------|----------------------------------------------------------------|-----------------------------------------------------------------------------------------------------------------------------------------------------------------------------------------------------------------------------------------------------------------------------------------------------------------------------------------------------------------------|-----------------------------------------------------------------------------------------------------------------------------------------------------------------------------------------------------------------------------------------------------------------------------------------|----------------------------------|-----------------------------|---------------------------------|
| GF0027385 | 1                             | 0                        | 0                            | 0 Hypothetical protein (1)                                     | NADP binding [GO:0050661 molecular_function] (1); glucose metabolic process [GO:0006006 biological_process] (1); glucose-6-phosphate dehydrogenase activity [GO:0004345 molecular_function] (1); oxidation-reduction process [GO:005114 biological_process] (1)                                                                                                       | Glucose-6-phosphate dehydrogenase, C-terminal [IPRO22675] (1); Glucose-6-phosphate dehydrogenase [IPRO01282] (1)                                                                                                                                                                        | scaffold_2_mRNA_3072.1           | -                           | -                               |
| GF0027384 | 1                             | 0                        | 0                            | 0 Hypothetical protein (1)                                     | protein binding [GO:0005515 molecular_function] (1)                                                                                                                                                                                                                                                                                                                   | Leucine-rich repeat [IPRO01611] (1); Leucine-rich repeat domain, L domain-like [IPRO32675] (1)                                                                                                                                                                                          | scaffold_2_mRNA_3069.1           | -                           | -                               |
| GF0027383 | 1                             | 0                        | 0                            | 0 LRR receptor-like serine/threonine-protein kinase GSD1 (1)   | protein binding [GO:0005515 molecular_function] (1)                                                                                                                                                                                                                                                                                                                   | Leucine-rich repeat-containing N-terminal, plant-type [IPRO13210] (1); Leucine-rich repeat [IPRO01611] (1); Leucine-rich repeat, typical subtype [IPRO03591] (1); Leucine-rich repeat domain, L domain-like [IPRO32675] (1)                                                             | scaffold_2_mRNA_3066.1           | -                           | -                               |
| GF0027382 | 1                             | 0                        | 0                            | 0 Receptor like protein 33 (1)                                 | protein binding [GO:0005515 molecular_function] (1)                                                                                                                                                                                                                                                                                                                   | Leucine-rich repeat domain, L domain-like [IPRO32675] (1); Leucine-rich repeat [IPRO01611] (1)                                                                                                                                                                                          | scaffold_2_mRNA_3064.1           | -                           | -                               |
| GF0027381 | 1                             | 0                        | 0                            | 0 Hypothetical protein (1)                                     | glucose-6-phosphate dehydrogenase activity [GO:0004345 molecular_function] (1); oxidation-reduction process [GO:005114 biological_process] (1); glucose metabolic process [GO:0006006 biological_process] (1); NADP binding [GO:0050661 molecular_function] (1)                                                                                                       | NAD(P)-binding domain [IPRO16040] (1); Glucose-6-phosphate dehydrogenase, C-terminal [IPRO22675] (1); Glucose-6-phosphate dehydrogenase [IPRO01282] (1); Glucose-6-phosphate dehydrogenase, NAD-binding [IPRO22674] (1)                                                                 | scaffold_2_mRNA_3062.1           | -                           | -                               |
| GF0027380 | 1                             | 0                        | 0                            | 0 Leucine-rich repeat, plant specific (1)                      | protein binding [GO:0005515 molecular_function] (1)                                                                                                                                                                                                                                                                                                                   | Leucine-rich repeat domain, L domain-like [IPRO32675] (1); Leucine-rich repeat [IPRO01611] (1)                                                                                                                                                                                          | scaffold_2_mRNA_3061.1           | -                           | -                               |
| GF0027379 | 1                             | 0                        | 0                            | 0 Putative disease resistance protein (1)                      | protein binding [GO:0005515 molecular_function] (1)                                                                                                                                                                                                                                                                                                                   | Leucine-rich repeat [IPRO01611] (1); Leucine-rich repeat, typical subtype [IPRO03591] (1); Leucine-rich repeat domain, L domain-like [IPRO32675] (1)                                                                                                                                    | scaffold_2_mRNA_3058.1           | -                           | -                               |
| GF0027378 | 1                             | 0                        | 0                            | 0 Hypothetical protein (1)                                     | protein binding [GO:0005515 molecular_function] (1)                                                                                                                                                                                                                                                                                                                   | Leucine-rich repeat [IPRO01611] (1); Leucine-rich repeat, typical subtype [IPRO03591] (1); Leucine-rich repeat domain, L domain-like [IPRO32675] (1)                                                                                                                                    | scaffold_2_mRNA_3056.1           | -                           | -                               |
| GF0027377 | 1                             | 0                        | 0                            | 0 LRR receptor-like serine/threonine-protein kinase EFR (1)    | protein binding [GO:0005515 molecular_function] (1)                                                                                                                                                                                                                                                                                                                   | Leucine-rich repeat [IPRO01611] (1); Leucine-rich repeat, typical subtype [IPRO03591] (1); Leucine-rich repeat domain, L domain-like [IPRO32675] (1)                                                                                                                                    | scaffold_2_mRNA_3055.1           | -                           | -                               |
| GF0027376 | 1                             | 0                        | 0                            | 0 ABC transporter G family member 14 (1)                       | membrane [GO:0016020 cellular_component] (1); ATPase activity [GO:0016887 molecular_function] (1); ATP binding [GO:0005524 molecular_function] (1)                                                                                                                                                                                                                    | P-loop containing nucleoside triphosphate hydrolase [IPRO07417] (1); ABC-2 type transporter [IPRO13525] (1); ABC transporter-like [IPRO03439] (1)                                                                                                                                       | scaffold_2_mRNA_3054.1           | -                           | -                               |
| GF0027375 | 1                             | 0                        | 0                            | 0 Hypothetical protein (1)                                     | ATP binding [GO:0005524 molecular_function] (1); ATPase activity [GO:0016887 molecular_function] (1); NADP binding [GO:0050661 molecular_function] (1); glucose-6-phosphate dehydrogenase activity [GO:0004345 molecular_function] (1); oxidation-reduction process [GO:005114 biological_process] (1); glucose metabolic process [GO:0006006 biological_process] (1) | ABC transporter-like [IPRO03439] (1); P-loop containing nucleoside triphosphate hydrolyase [IPRO07417] (1)                                                                                                                                                                              | scaffold_2_mRNA_3053.1           | -                           | -                               |
| GF0027374 | 1                             | 0                        | 0                            | 0 Hypothetical protein (1)                                     | NADP binding [GO:0050661 molecular_function] (1); glucose-6-phosphate dehydrogenase activity [GO:0004345 molecular_function] (1); oxidation-reduction process [GO:005114 biological_process] (1); glucose metabolic process [GO:0006006 biological_process] (1)                                                                                                       | Glucose-6-phosphate dehydrogenase, NAD-binding [IPRO22674] (1); NAD(P)-binding domain [IPRO16040] (1); Glucose-6-phosphate dehydrogenase [IPRO01282] (1)                                                                                                                                | scaffold_2_mRNA_3050.1           | -                           | -                               |
| GF0027373 | 1                             | 0                        | 0                            | 0 Hypothetical protein (1)                                     | glucose metabolic process [GO:0006006 biological_process] (1); oxidation-reduction process [GO:005114 biological_process] (1); glucose-6-phosphate dehydrogenase activity [GO:0004345 molecular_function] (1); NADP binding [GO:0050661 molecular_function] (1)                                                                                                       | Glucose-6-phosphate dehydrogenase, active site [IPRO19796] (1); Glucose-6-phosphate dehydrogenase, NAD-binding [IPRO22674] (1); Glucose-6-phosphate dehydrogenase [IPRO01282] (1); Glucose-6-phosphate dehydrogenase, C-terminal [IPRO22675] (1); NAD(P)-binding domain [IPRO16040] (1) | scaffold_2_mRNA_3047.1           | -                           | -                               |
| GF0027372 | 1                             | 0                        | 0                            | 0 Verticillium wilt resistance-like protein (1)                | protein binding [GO:0005515 molecular_function] (1)                                                                                                                                                                                                                                                                                                                   | Leucine-rich repeat, typical subtype [IPRO03591] (1); Leucine-rich repeat domain, L domain-like [IPRO32675] (1); Leucine-rich repeat-containing N-terminal, plant-type [IPRO13210] (1); Leucine-rich repeat [IPRO01611] (1)                                                             | scaffold_2_mRNA_3046.1           | -                           | -                               |
| GF0027371 | 1                             | 0                        | 0                            | 0 Glucose-6-phosphate 1-dehydrogenase, cytoplasmic isoform (1) | NADP binding [GO:0050661 molecular_function] (1); oxidation-reduction process [GO:005114 biological_process] (1); glucose-6-phosphate dehydrogenase activity [GO:0004345 molecular_function] (1); glucose metabolic process [GO:0006006 biological_process] (1)                                                                                                       | Glucose-6-phosphate dehydrogenase, NAD-binding [IPRO22674] (1); Glucose-6-phosphate dehydrogenase [IPRO01282] (1); Glucose-6-phosphate dehydrogenase, C-terminal [IPRO22675] (1); NAD(P)-binding domain [IPRO16040] (1)                                                                 | scaffold_2_mRNA_3045.1           | -                           | -                               |
| GF0027370 | 1                             | 0                        | 0                            | 0 Hypothetical protein (1)                                     | protein binding [GO:0005515 molecular_function] (1)                                                                                                                                                                                                                                                                                                                   | Leucine-rich repeat [IPRO01611] (1); Leucine-rich repeat domain, L domain-like [IPRO32675] (1); Leucine-rich repeat, typical subtype [IPRO03591] (1)                                                                                                                                    | scaffold_2_mRNA_3044.1           | -                           | -                               |
| GF0027369 | 1                             | 0                        | 0                            | 0 Receptor like protein 33 (1)                                 | protein binding [GO:0005515 molecular_function] (1)                                                                                                                                                                                                                                                                                                                   | Leucine-rich repeat [IPRO01611] (1); Leucine-rich repeat-containing N-terminal, plant-type [IPRO13210] (1); Leucine-rich repeat domain, L domain-like [IPRO32675] (1); Leucine-rich repeat, typical subtype [IPRO03591] (1)                                                             | scaffold_2_mRNA_3042.1           | -                           | -                               |
| GF0027368 | 1                             | 0                        | 0                            | 0 Hypothetical protein (1)                                     | protein binding [GO:0005515 molecular_function] (1)                                                                                                                                                                                                                                                                                                                   | Leucine-rich repeat-containing N-terminal, plant-type [IPRO13210] (1); Leucine-rich repeat [IPRO01611] (1); Leucine-rich repeat domain, L domain-like [IPRO32675] (1)                                                                                                                   | scaffold_2_mRNA_3041.1           | -                           | -                               |
| GF0027367 | 1                             | 0                        | 0                            | 0 Receptor like protein 33 (1)                                 | protein binding [GO:0005515 molecular_function] (1)                                                                                                                                                                                                                                                                                                                   | Leucine-rich repeat, typical subtype [IPRO03591] (1); Leucine-rich repeat domain, L domain-like [IPRO32675] (1); Leucine-rich repeat-containing N-terminal, plant-type [IPRO13210] (1)                                                                                                  | scaffold_2_mRNA_3039.1           | -                           | -                               |
| GF0027366 | 1                             | 0                        | 0                            | 0 Verticillium wilt resistance-like protein (1)                | protein binding [GO:0005515 molecular_function] (1)                                                                                                                                                                                                                                                                                                                   | Leucine-rich repeat, typical subtype [IPRO03591] (1); Leucine-rich repeat domain, L domain-like [IPRO32675] (1); Leucine-rich repeat [IPRO01611] (1); Leucine-rich repeat-containing N-terminal, plant-type [IPRO13210] (1)                                                             | scaffold_2_mRNA_3038.1           | -                           | -                               |
| GF0027365 | 1                             | 0                        | 0                            | 0 Cytochrome P450 71D8 (1)                                     | iron ion binding [GO:0005506 molecular_function] (1); heme binding [GO:0020037 molecular_function] (1); oxidoreductase activity, acting on paired donors, with incorporation or reduction of molecular oxygen [GO:0016705 molecular_function] (1); oxidation-reduction process [GO:005114 biological_process] (1)                                                     | Cytochrome P450 [IPRO01128] (1); Cytochrome P450, E-class, group 1 [IPRO02401] (1)                                                                                                                                                                                                      | scaffold_2_mRNA_3032.1           | -                           | -                               |
| GF0027364 | 1                             | 0                        | 0                            | 0 Hypothetical protein (1)                                     |                                                                                                                                                                                                                                                                                                                                                                       |                                                                                                                                                                                                                                                                                         | scaffold_2_mRNA_303.1            | -                           | -                               |
| GF0027363 | 1                             | 0                        | 0                            | 0 Monosaccharide transport protein (1)                         |                                                                                                                                                                                                                                                                                                                                                                       |                                                                                                                                                                                                                                                                                         | scaffold_2_mRNA_2996.1           | -                           | -                               |
| GF0027362 | 1                             | 0                        | 0                            | 0 Hypothetical protein (1)                                     |                                                                                                                                                                                                                                                                                                                                                                       | Retrosposon gag domain [IPRO05162] (1)                                                                                                                                                                                                                                                  | scaffold_2_mRNA_2994.1           | -                           | -                               |
| GF0027361 | 1                             | 0                        | 0                            | 0 Transposase tm2 (1)                                          |                                                                                                                                                                                                                                                                                                                                                                       | Transposon, EriSpm-like [IPRO04242] (1)                                                                                                                                                                                                                                                 | scaffold_2_mRNA_2970.1           | -                           | -                               |
| GF0027360 | 1                             | 0                        | 0                            | 0 Hypothetical protein (1)                                     | protein dimerization activity [GO:0046983 molecular_function] (1); nucleic acid binding [GO:0003676 molecular_function] (1)                                                                                                                                                                                                                                           | Ribonuclease H-like domain [IPRO12337] (1); HAT, C-terminal dimerisation domain [IPRO08906] (1)                                                                                                                                                                                         | scaffold_2_mRNA_2965.1           | -                           | -                               |
| GF0027359 | 1                             | 0                        | 0                            | 0 Hypothetical protein (1)                                     |                                                                                                                                                                                                                                                                                                                                                                       |                                                                                                                                                                                                                                                                                         | scaffold_2_mRNA_2960.1           | -                           | -                               |
| GF0027358 | 1                             | 0                        | 0                            | 0 Hypothetical protein (1)                                     |                                                                                                                                                                                                                                                                                                                                                                       |                                                                                                                                                                                                                                                                                         | scaffold_2_mRNA_2957.1           | -                           | -                               |
| GF0027357 | 1                             | 0                        | 0                            | 0 Pol polyprotein (1)                                          |                                                                                                                                                                                                                                                                                                                                                                       |                                                                                                                                                                                                                                                                                         | scaffold_2_mRNA_2954.1           | -                           | -                               |
| GF0027356 | 1                             | 0                        | 0                            | 0 Hypothetical protein (1)                                     | nucleic acid binding [GO:0003676 molecular_function] (1); zinc ion binding [GO:0008270 molecular_function] (1)                                                                                                                                                                                                                                                        | Zinc finger, CCHC-type [IPRO01878] (1)                                                                                                                                                                                                                                                  | scaffold_2_mRNA_295.1            | -                           | -                               |
| GF0027355 | 1                             | 0                        | 0                            | 0 Hypothetical protein (1)                                     |                                                                                                                                                                                                                                                                                                                                                                       |                                                                                                                                                                                                                                                                                         | scaffold_2_mRNA_294.1            | -                           | -                               |
| GF0027354 | 1                             | 0                        | 0                            | 0 Hypothetical protein (1)                                     |                                                                                                                                                                                                                                                                                                                                                                       |                                                                                                                                                                                                                                                                                         | scaffold_2_mRNA_2919.1           | -                           | -                               |
| GF0027353 | 1                             | 0                        | 0                            | 0 Hypothetical protein (1)                                     | nucleic acid binding [GO:0003676 molecular_function] (1); protein dimerization activity [GO:0046983 molecular_function] (1)                                                                                                                                                                                                                                           | Ribonuclease H-like domain [IPRO12337] (1); HAT, C-terminal dimerisation domain [IPRO08906] (1)                                                                                                                                                                                         | scaffold_2_mRNA_2902.1           | -                           | -                               |
| GF0027352 | 1                             | 0                        | 0                            | 0 Hypothetical protein (1)                                     |                                                                                                                                                                                                                                                                                                                                                                       |                                                                                                                                                                                                                                                                                         | scaffold_2_mRNA_290.1            | -                           | -                               |
| GF0027351 | 1                             | 0                        | 0                            | 0 Cytokinin riboside 5'-monophosphate phosphoribohydrolase (1) |                                                                                                                                                                                                                                                                                                                                                                       |                                                                                                                                                                                                                                                                                         | scaffold_2_mRNA_2898.1           | -                           | -                               |
| GF0027350 | 1                             | 0                        | 0                            | 0 Hypothetical protein (1)                                     |                                                                                                                                                                                                                                                                                                                                                                       |                                                                                                                                                                                                                                                                                         | scaffold_2_mRNA_2897.1           | -                           | -                               |
| GF0027349 | 1                             | 0                        | 0                            | 0 Hypothetical protein (1)                                     | regulation of transcription, DNA-templated [GO:0006355 biological_process] (1)                                                                                                                                                                                                                                                                                        | FHY3/FAR1 family [IPRO031052] (1); FAR1 DNA binding domain [IPRO04330] (1)                                                                                                                                                                                                              | scaffold_2_mRNA_2894.1           | -                           | -                               |
| GF0027348 | 1                             | 0                        | 0                            | 0 Hypothetical protein (1)                                     |                                                                                                                                                                                                                                                                                                                                                                       |                                                                                                                                                                                                                                                                                         | scaffold_2_mRNA_2893.1           | -                           | -                               |
| GF0027347 | 1                             | 0                        | 0                            | 0 Cytokinin riboside 5'-monophosphate phosphoribohydrolase (1) |                                                                                                                                                                                                                                                                                                                                                                       |                                                                                                                                                                                                                                                                                         | scaffold_2_mRNA_2892.1           | -                           | -                               |
| GF0027346 | 1                             | 0                        | 0                            | 0 Hypothetical protein (1)                                     |                                                                                                                                                                                                                                                                                                                                                                       |                                                                                                                                                                                                                                                                                         | scaffold_2_mRNA_289.1            | -                           | -                               |
| GF0027345 | 1                             | 0                        | 0                            | 0 Hypothetical protein (1)                                     | nucleic acid binding [GO:0003676 molecular_function] (1); regulation of transcription, DNA-templated [GO:0006355 biological_process] (1)                                                                                                                                                                                                                              | Carbavirus nucleic acid-binding protein [IPRO02568] (1)                                                                                                                                                                                                                                 | scaffold_2_mRNA_2885.1           | -                           | -                               |
| GF0027344 | 1                             | 0                        | 0                            | 0 Hypothetical protein (1)                                     |                                                                                                                                                                                                                                                                                                                                                                       |                                                                                                                                                                                                                                                                                         | scaffold_2_mRNA_2884.1           | -                           | -                               |
| GF0027343 | 1                             | 0                        | 0                            | 0 Hypothetical protein (1)                                     |                                                                                                                                                                                                                                                                                                                                                                       |                                                                                                                                                                                                                                                                                         | scaffold_2_mRNA_288.1            | -                           | -                               |

| ID        | Num. in <i>C. clementiae</i> | Num. in <i>C. uchiha</i> | Num. in <i>P. trifoliata</i> | Note                                                              | GO                                                                                                                                                                                                                                                                                                                                                                      | InterPro                                                                                                                                                                                                                                                                                                                                                                                                                                             | Members in <i>C. clementiae</i> | Members in <i>C. uchiha</i> | Members in <i>P. trifoliata</i> |
|-----------|------------------------------|--------------------------|------------------------------|-------------------------------------------------------------------|-------------------------------------------------------------------------------------------------------------------------------------------------------------------------------------------------------------------------------------------------------------------------------------------------------------------------------------------------------------------------|------------------------------------------------------------------------------------------------------------------------------------------------------------------------------------------------------------------------------------------------------------------------------------------------------------------------------------------------------------------------------------------------------------------------------------------------------|---------------------------------|-----------------------------|---------------------------------|
| GF0027342 | 1                            | 0                        | 0                            | RNA-directed DNA polymerase, related                              | nucleic acid binding [GO:0003676 molecular_function] (1)                                                                                                                                                                                                                                                                                                                | Ribonuclease H-like domain [IPRO12337] (1); Reverse transcriptase domain [IPRO0477] (1)                                                                                                                                                                                                                                                                                                                                                              | scaffold_2_mRNA_2873.1          | -                           | -                               |
| GF0027341 | 1                            | 0                        | 0                            | Hypothetical protein (1)                                          |                                                                                                                                                                                                                                                                                                                                                                         | LOG family [IPRO31100] (1)                                                                                                                                                                                                                                                                                                                                                                                                                           | scaffold_2_mRNA_2856.1          | -                           | -                               |
| GF0027340 | 1                            | 0                        | 0                            | Hypothetical protein (1)                                          |                                                                                                                                                                                                                                                                                                                                                                         |                                                                                                                                                                                                                                                                                                                                                                                                                                                      | scaffold_2_mRNA_2853.1          | -                           | -                               |
| GF0027339 | 1                            | 0                        | 0                            | Hypothetical protein (1)                                          |                                                                                                                                                                                                                                                                                                                                                                         |                                                                                                                                                                                                                                                                                                                                                                                                                                                      | scaffold_2_mRNA_285.1           | -                           | -                               |
| GF0027338 | 1                            | 0                        | 0                            | Stress responsive alpha-beta barrel domain protein isoform 2 (1)  |                                                                                                                                                                                                                                                                                                                                                                         | Stress responsive alpha-beta barrel [IPRO13097] (1); Dimeric alpha-beta barrel [IPRO11008] (1)                                                                                                                                                                                                                                                                                                                                                       | scaffold_2_mRNA_2843.1          | -                           | -                               |
| GF0027337 | 1                            | 0                        | 0                            | Hypothetical protein (1)                                          |                                                                                                                                                                                                                                                                                                                                                                         |                                                                                                                                                                                                                                                                                                                                                                                                                                                      | scaffold_2_mRNA_2832.1          | -                           | -                               |
| GF0027336 | 1                            | 0                        | 0                            | Hypothetical protein (1)                                          |                                                                                                                                                                                                                                                                                                                                                                         |                                                                                                                                                                                                                                                                                                                                                                                                                                                      | scaffold_2_mRNA_283.1           | -                           | -                               |
| GF0027335 | 1                            | 0                        | 0                            | Cytokinin riboside 5'-monophosphate phosphoribohydrolase (1)      |                                                                                                                                                                                                                                                                                                                                                                         | LOG family [IPRO31100] (1)                                                                                                                                                                                                                                                                                                                                                                                                                           | scaffold_2_mRNA_2826.1          | -                           | -                               |
| GF0027334 | 1                            | 0                        | 0                            | Hypothetical protein (1)                                          |                                                                                                                                                                                                                                                                                                                                                                         |                                                                                                                                                                                                                                                                                                                                                                                                                                                      | scaffold_2_mRNA_2825.1          | -                           | -                               |
| GF0027333 | 1                            | 0                        | 0                            | Hypothetical protein (1)                                          |                                                                                                                                                                                                                                                                                                                                                                         |                                                                                                                                                                                                                                                                                                                                                                                                                                                      | scaffold_2_mRNA_2823.1          | -                           | -                               |
| GF0027332 | 1                            | 0                        | 0                            | Hypothetical protein (1)                                          |                                                                                                                                                                                                                                                                                                                                                                         |                                                                                                                                                                                                                                                                                                                                                                                                                                                      | scaffold_2_mRNA_2822.1          | -                           | -                               |
| GF0027331 | 1                            | 0                        | 0                            | Hypothetical protein (1)                                          |                                                                                                                                                                                                                                                                                                                                                                         |                                                                                                                                                                                                                                                                                                                                                                                                                                                      | scaffold_2_mRNA_2821.1          | -                           | -                               |
| GF0027330 | 1                            | 0                        | 0                            | Cytokinin riboside 5'-monophosphate phosphoribohydrolase (1)      |                                                                                                                                                                                                                                                                                                                                                                         |                                                                                                                                                                                                                                                                                                                                                                                                                                                      | scaffold_2_mRNA_2818.1          | -                           | -                               |
| GF0027329 | 1                            | 0                        | 0                            | Hypothetical protein (1)                                          |                                                                                                                                                                                                                                                                                                                                                                         |                                                                                                                                                                                                                                                                                                                                                                                                                                                      | scaffold_2_mRNA_2814.1          | -                           | -                               |
| GF0027328 | 1                            | 0                        | 0                            | Hypothetical protein (1)                                          | nucleic acid binding [GO:0003676 molecular_function] (1)                                                                                                                                                                                                                                                                                                                | Ribonuclease H-like domain [IPRO12337] (1)                                                                                                                                                                                                                                                                                                                                                                                                           | scaffold_2_mRNA_2813.1          | -                           | -                               |
| GF0027327 | 1                            | 0                        | 0                            | Hypothetical protein (1)                                          |                                                                                                                                                                                                                                                                                                                                                                         |                                                                                                                                                                                                                                                                                                                                                                                                                                                      | scaffold_2_mRNA_2812.1          | -                           | -                               |
| GF0027326 | 1                            | 0                        | 0                            | Cytokinin riboside 5'-monophosphate phosphoribohydrolase (1)      |                                                                                                                                                                                                                                                                                                                                                                         | LOG family [IPRO31100] (1)                                                                                                                                                                                                                                                                                                                                                                                                                           | scaffold_2_mRNA_281.1           | -                           | -                               |
| GF0027325 | 1                            | 0                        | 0                            | Hypothetical protein (1)                                          |                                                                                                                                                                                                                                                                                                                                                                         |                                                                                                                                                                                                                                                                                                                                                                                                                                                      | scaffold_2_mRNA_2806.1          | -                           | -                               |
| GF0027324 | 1                            | 0                        | 0                            | Cytokinin riboside 5'-monophosphate phosphoribohydrolase (1)      |                                                                                                                                                                                                                                                                                                                                                                         | LOG family [IPRO31100] (1)                                                                                                                                                                                                                                                                                                                                                                                                                           | scaffold_2_mRNA_2805.1          | -                           | -                               |
| GF0027323 | 1                            | 0                        | 0                            | Hypothetical protein (1)                                          |                                                                                                                                                                                                                                                                                                                                                                         |                                                                                                                                                                                                                                                                                                                                                                                                                                                      | scaffold_2_mRNA_2799.1          | -                           | -                               |
| GF0027322 | 1                            | 0                        | 0                            | Hypothetical protein (1)                                          |                                                                                                                                                                                                                                                                                                                                                                         |                                                                                                                                                                                                                                                                                                                                                                                                                                                      | scaffold_2_mRNA_2793.1          | -                           | -                               |
| GF0027321 | 1                            | 0                        | 0                            | Hypothetical protein (1)                                          |                                                                                                                                                                                                                                                                                                                                                                         |                                                                                                                                                                                                                                                                                                                                                                                                                                                      | scaffold_2_mRNA_2792.1          | -                           | -                               |
| GF0027320 | 1                            | 0                        | 0                            | Hypothetical protein (1)                                          |                                                                                                                                                                                                                                                                                                                                                                         |                                                                                                                                                                                                                                                                                                                                                                                                                                                      | scaffold_2_mRNA_2790.1          | -                           | -                               |
| GF0027319 | 1                            | 0                        | 0                            | Hypothetical protein (1)                                          |                                                                                                                                                                                                                                                                                                                                                                         |                                                                                                                                                                                                                                                                                                                                                                                                                                                      | scaffold_2_mRNA_2776.1          | -                           | -                               |
| GF0027318 | 1                            | 0                        | 0                            | Hypothetical protein (1)                                          |                                                                                                                                                                                                                                                                                                                                                                         |                                                                                                                                                                                                                                                                                                                                                                                                                                                      | scaffold_2_mRNA_2774.1          | -                           | -                               |
| GF0027317 | 1                            | 0                        | 0                            | Hypothetical protein (1)                                          |                                                                                                                                                                                                                                                                                                                                                                         |                                                                                                                                                                                                                                                                                                                                                                                                                                                      | scaffold_2_mRNA_2762.1          | -                           | -                               |
| GF0027316 | 1                            | 0                        | 0                            | Hypothetical protein (1)                                          |                                                                                                                                                                                                                                                                                                                                                                         | LOG family [IPRO31100] (1)                                                                                                                                                                                                                                                                                                                                                                                                                           | scaffold_2_mRNA_2753.1          | -                           | -                               |
| GF0027315 | 1                            | 0                        | 0                            | Hypothetical protein (1)                                          |                                                                                                                                                                                                                                                                                                                                                                         |                                                                                                                                                                                                                                                                                                                                                                                                                                                      | scaffold_2_mRNA_2749.1          | -                           | -                               |
| GF0027314 | 1                            | 0                        | 0                            | Cytokinin riboside 5'-monophosphate phosphoribohydrolase (1)      |                                                                                                                                                                                                                                                                                                                                                                         | LOG family [IPRO31100] (1)                                                                                                                                                                                                                                                                                                                                                                                                                           | scaffold_2_mRNA_2748.1          | -                           | -                               |
| GF0027313 | 1                            | 0                        | 0                            | Hypothetical protein (1)                                          |                                                                                                                                                                                                                                                                                                                                                                         | Reverse transcriptase, RNA-dependent DNA polymerase [IPRO13103] (1)                                                                                                                                                                                                                                                                                                                                                                                  | scaffold_2_mRNA_2741.1          | -                           | -                               |
| GF0027312 | 1                            | 0                        | 0                            | Hypothetical protein (1)                                          |                                                                                                                                                                                                                                                                                                                                                                         |                                                                                                                                                                                                                                                                                                                                                                                                                                                      | scaffold_2_mRNA_2739.1          | -                           | -                               |
| GF0027311 | 1                            | 0                        | 0                            | Hypothetical protein (1)                                          | zinc ion binding [GO:0008270 molecular_function] (1); nucleic acid binding [GO:0003676 molecular_function] (1)                                                                                                                                                                                                                                                          | Zinc finger, CCHC-type [IPRO01878] (1)                                                                                                                                                                                                                                                                                                                                                                                                               | scaffold_2_mRNA_2736.1          | -                           | -                               |
| GF0027310 | 1                            | 0                        | 0                            | Hypothetical protein (1)                                          |                                                                                                                                                                                                                                                                                                                                                                         |                                                                                                                                                                                                                                                                                                                                                                                                                                                      | scaffold_2_mRNA_2733.1          | -                           | -                               |
| GF0027309 | 1                            | 0                        | 0                            | Hypothetical protein (1)                                          |                                                                                                                                                                                                                                                                                                                                                                         |                                                                                                                                                                                                                                                                                                                                                                                                                                                      | scaffold_2_mRNA_273.1           | -                           | -                               |
| GF0027308 | 1                            | 0                        | 0                            | Hypothetical protein (1)                                          |                                                                                                                                                                                                                                                                                                                                                                         |                                                                                                                                                                                                                                                                                                                                                                                                                                                      | scaffold_2_mRNA_2721.1          | -                           | -                               |
| GF0027307 | 1                            | 0                        | 0                            | Hypothetical protein (1)                                          |                                                                                                                                                                                                                                                                                                                                                                         |                                                                                                                                                                                                                                                                                                                                                                                                                                                      | scaffold_2_mRNA_2720.1          | -                           | -                               |
| GF0027306 | 1                            | 0                        | 0                            | Hypothetical protein (1)                                          |                                                                                                                                                                                                                                                                                                                                                                         |                                                                                                                                                                                                                                                                                                                                                                                                                                                      | scaffold_2_mRNA_2719.1          | -                           | -                               |
| GF0027305 | 1                            | 0                        | 0                            | Hypothetical protein (1)                                          |                                                                                                                                                                                                                                                                                                                                                                         |                                                                                                                                                                                                                                                                                                                                                                                                                                                      | scaffold_2_mRNA_2718.1          | -                           | -                               |
| GF0027304 | 1                            | 0                        | 0                            | Hypothetical protein (1)                                          |                                                                                                                                                                                                                                                                                                                                                                         |                                                                                                                                                                                                                                                                                                                                                                                                                                                      | scaffold_2_mRNA_2717.1          | -                           | -                               |
| GF0027303 | 1                            | 0                        | 0                            | Hypothetical protein (1)                                          |                                                                                                                                                                                                                                                                                                                                                                         |                                                                                                                                                                                                                                                                                                                                                                                                                                                      | scaffold_2_mRNA_2716.1          | -                           | -                               |
| GF0027302 | 1                            | 0                        | 0                            | cDNA clone 001-127-C06, full insert sequence (1)                  |                                                                                                                                                                                                                                                                                                                                                                         | Trichostema hirsutigenae-like family [IPRO29962] (1); PC-Esterase [IPRO26057] (1)                                                                                                                                                                                                                                                                                                                                                                    | scaffold_2_mRNA_2712.1          | -                           | -                               |
| GF0027301 | 1                            | 0                        | 0                            | Hypothetical protein (1)                                          | zinc ion binding [GO:0008270 molecular_function] (1); nucleic acid binding [GO:0003676 molecular_function] (1)                                                                                                                                                                                                                                                          | Zinc finger, CCHC-type [IPRO01878] (1)                                                                                                                                                                                                                                                                                                                                                                                                               | scaffold_2_mRNA_2683.1          | -                           | -                               |
| GF0027300 | 1                            | 0                        | 0                            | Hypothetical protein (1)                                          |                                                                                                                                                                                                                                                                                                                                                                         |                                                                                                                                                                                                                                                                                                                                                                                                                                                      | scaffold_2_mRNA_2666.1          | -                           | -                               |
| GF0027299 | 1                            | 0                        | 0                            | Cytokinin riboside 5'-monophosphate phosphoribohydrolase (1)      |                                                                                                                                                                                                                                                                                                                                                                         | LOG family [IPRO31100] (1); Cytokinin riboside 5'-monophosphate phosphoribohydrolase LOG [IPRO05269] (1)                                                                                                                                                                                                                                                                                                                                             | scaffold_2_mRNA_2665.1          | -                           | -                               |
| GF0027298 | 1                            | 0                        | 0                            | Hypothetical protein (1)                                          |                                                                                                                                                                                                                                                                                                                                                                         |                                                                                                                                                                                                                                                                                                                                                                                                                                                      | scaffold_2_mRNA_2663.1          | -                           | -                               |
| GF0027297 | 1                            | 0                        | 0                            | Hypothetical protein (1)                                          | ATP binding [GO:0005524 molecular_function] (1)                                                                                                                                                                                                                                                                                                                         | Chaperonin Cpn60/TCP-1 family [IPRO2423] (1); GroEL-like equatorial domain [IPRO27413] (1)                                                                                                                                                                                                                                                                                                                                                           | scaffold_2_mRNA_2661.1          | -                           | -                               |
| GF0027296 | 1                            | 0                        | 0                            | Hypothetical protein (1)                                          | cell redox homeostasis [GO:0045454 biological_process] (1)                                                                                                                                                                                                                                                                                                              | Thioredoxin-like fold [IPRO12336] (1); NADP-dependent oxidoreductase domain [IPRO23210] (1); Thioredoxin domain [IPRO13766] (1)                                                                                                                                                                                                                                                                                                                      | scaffold_2_mRNA_2660.1          | -                           | -                               |
| GF0027295 | 1                            | 0                        | 0                            | Hypothetical protein (1)                                          | cysteine-type peptidase activity [GO:0008234 molecular_function] (1); proteolysis [GO:0006508 biological_process] (1)                                                                                                                                                                                                                                                   | Ulp1 protease family, C-terminal catalytic domain [IPRO03653] (1); Domain of unknown function DUF1985 [IPRO15410] (1)                                                                                                                                                                                                                                                                                                                                | scaffold_2_mRNA_266.1           | -                           | -                               |
| GF0027294 | 1                            | 0                        | 0                            | Hypothetical protein (1)                                          |                                                                                                                                                                                                                                                                                                                                                                         |                                                                                                                                                                                                                                                                                                                                                                                                                                                      | scaffold_2_mRNA_2659.1          | -                           | -                               |
| GF0027293 | 1                            | 0                        | 0                            | Mutator-like transposase (1)                                      | zinc ion binding [GO:0008270 molecular_function] (1)                                                                                                                                                                                                                                                                                                                    | MULE transposase domain [IPRO18289] (1); Zinc finger, PMZ-type [IPRO06564] (1); Transposase, Mu/DR, plant [IPRO04332] (1); Zinc finger, SWIM-type [IPRO07527] (1)                                                                                                                                                                                                                                                                                    | scaffold_2_mRNA_265.1           | -                           | -                               |
| GF0027292 | 1                            | 0                        | 0                            | Hypothetical protein (1)                                          |                                                                                                                                                                                                                                                                                                                                                                         |                                                                                                                                                                                                                                                                                                                                                                                                                                                      | scaffold_2_mRNA_2649.1          | -                           | -                               |
| GF0027291 | 1                            | 0                        | 0                            | Hypothetical protein (1)                                          |                                                                                                                                                                                                                                                                                                                                                                         |                                                                                                                                                                                                                                                                                                                                                                                                                                                      | scaffold_2_mRNA_2647.1          | -                           | -                               |
| GF0027290 | 1                            | 0                        | 0                            | Hypothetical protein (1)                                          |                                                                                                                                                                                                                                                                                                                                                                         |                                                                                                                                                                                                                                                                                                                                                                                                                                                      | scaffold_2_mRNA_2646.1          | -                           | -                               |
| GF0027289 | 1                            | 0                        | 0                            | Cytokinin riboside 5'-monophosphate phosphoribohydrolase (1)      |                                                                                                                                                                                                                                                                                                                                                                         | LOG family [IPRO31100] (1)                                                                                                                                                                                                                                                                                                                                                                                                                           | scaffold_2_mRNA_2645.1          | -                           | -                               |
| GF0027288 | 1                            | 0                        | 0                            | Cytokinin riboside 5'-monophosphate phosphoribohydrolase (1)      |                                                                                                                                                                                                                                                                                                                                                                         |                                                                                                                                                                                                                                                                                                                                                                                                                                                      | scaffold_2_mRNA_2644.1          | -                           | -                               |
| GF0027287 | 1                            | 0                        | 0                            | Hypothetical protein (1)                                          |                                                                                                                                                                                                                                                                                                                                                                         |                                                                                                                                                                                                                                                                                                                                                                                                                                                      | scaffold_2_mRNA_2643.1          | -                           | -                               |
| GF0027286 | 1                            | 0                        | 0                            | Hypothetical protein (1)                                          |                                                                                                                                                                                                                                                                                                                                                                         |                                                                                                                                                                                                                                                                                                                                                                                                                                                      | scaffold_2_mRNA_264.1           | -                           | -                               |
| GF0027285 | 1                            | 0                        | 0                            | Putative retroelement pol polyprotein (1)                         | DNA integration [GO:0015074 biological_process] (1); nucleic acid binding [GO:0003676 molecular_function] (1)                                                                                                                                                                                                                                                           | GAG-pro-integrase domain [IPRO25724] (1); Ribonuclease H-like domain [IPRO12337] (1); Reverse transcriptase, RNA-dependent DNA polymerase [IPRO13103] (1); Integrase, catalytic core [IPRO1584] (1)                                                                                                                                                                                                                                                  | scaffold_2_mRNA_2639.1          | -                           | -                               |
| GF0027284 | 1                            | 0                        | 0                            | Cytokinin riboside 5'-monophosphate phosphoribohydrolase (1)      |                                                                                                                                                                                                                                                                                                                                                                         | LOG family [IPRO31100] (1)                                                                                                                                                                                                                                                                                                                                                                                                                           | scaffold_2_mRNA_2637.1          | -                           | -                               |
| GF0027283 | 1                            | 0                        | 0                            | Hypothetical protein (1)                                          |                                                                                                                                                                                                                                                                                                                                                                         | Aspartic peptidase domain [IPRO21109] (1)                                                                                                                                                                                                                                                                                                                                                                                                            | scaffold_2_mRNA_2636.1          | -                           | -                               |
| GF0027282 | 1                            | 0                        | 0                            | Hypothetical protein (1)                                          |                                                                                                                                                                                                                                                                                                                                                                         |                                                                                                                                                                                                                                                                                                                                                                                                                                                      | scaffold_2_mRNA_2635.1          | -                           | -                               |
| GF0027281 | 1                            | 0                        | 0                            | Hypothetical protein (1)                                          |                                                                                                                                                                                                                                                                                                                                                                         |                                                                                                                                                                                                                                                                                                                                                                                                                                                      | scaffold_2_mRNA_2634.1          | -                           | -                               |
| GF0027280 | 1                            | 0                        | 0                            | Hypothetical protein (1)                                          |                                                                                                                                                                                                                                                                                                                                                                         |                                                                                                                                                                                                                                                                                                                                                                                                                                                      | scaffold_2_mRNA_2630.1          | -                           | -                               |
| GF0027279 | 1                            | 0                        | 0                            | Hypothetical protein (1)                                          |                                                                                                                                                                                                                                                                                                                                                                         | Transposon, En/Spm-like [IPRO04242] (1)                                                                                                                                                                                                                                                                                                                                                                                                              | scaffold_2_mRNA_2629.1          | -                           | -                               |
| GF0027278 | 1                            | 0                        | 0                            | Hypothetical protein (1)                                          |                                                                                                                                                                                                                                                                                                                                                                         |                                                                                                                                                                                                                                                                                                                                                                                                                                                      | scaffold_2_mRNA_2625.1          | -                           | -                               |
| GF0027277 | 1                            | 0                        | 0                            | Hypothetical protein (1)                                          |                                                                                                                                                                                                                                                                                                                                                                         |                                                                                                                                                                                                                                                                                                                                                                                                                                                      | scaffold_2_mRNA_2621.1          | -                           | -                               |
| GF0027276 | 1                            | 0                        | 0                            | Hypothetical protein (1)                                          |                                                                                                                                                                                                                                                                                                                                                                         |                                                                                                                                                                                                                                                                                                                                                                                                                                                      | scaffold_2_mRNA_2616.1          | -                           | -                               |
| GF0027275 | 1                            | 0                        | 0                            | Hypothetical protein (1)                                          |                                                                                                                                                                                                                                                                                                                                                                         |                                                                                                                                                                                                                                                                                                                                                                                                                                                      | scaffold_2_mRNA_2614.1          | -                           | -                               |
| GF0027274 | 1                            | 0                        | 0                            | Hypothetical protein (1)                                          |                                                                                                                                                                                                                                                                                                                                                                         |                                                                                                                                                                                                                                                                                                                                                                                                                                                      | scaffold_2_mRNA_2613.1          | -                           | -                               |
| GF0027273 | 1                            | 0                        | 0                            | Hypothetical protein (1)                                          |                                                                                                                                                                                                                                                                                                                                                                         |                                                                                                                                                                                                                                                                                                                                                                                                                                                      | scaffold_2_mRNA_2612.1          | -                           | -                               |
| GF0027272 | 1                            | 0                        | 0                            | Hypothetical protein (1)                                          |                                                                                                                                                                                                                                                                                                                                                                         |                                                                                                                                                                                                                                                                                                                                                                                                                                                      | scaffold_2_mRNA_2611.1          | -                           | -                               |
| GF0027271 | 1                            | 0                        | 0                            | Hypothetical protein (1)                                          |                                                                                                                                                                                                                                                                                                                                                                         |                                                                                                                                                                                                                                                                                                                                                                                                                                                      | scaffold_2_mRNA_2610.1          | -                           | -                               |
| GF0027270 | 1                            | 0                        | 0                            | G-type lectin S-receptor-like serine/threonine-protein kinase (1) | protein binding [GO:0005515 molecular_function] (1); ATP binding [GO:0005524 molecular_function] (1); protein kinase activity [GO:0004672 molecular_function] (1); protein serine/threonine kinase activity [GO:0004674 molecular_function] (1); recognition of pollen [GO:0048544 biological_process] (1); protein phosphorylation [GO:0006468 biological_process] (1) | Protein kinase domain [IPRO00719] (1); S-receptor-like serine/threonine-protein kinase [IPRO24171] (1); Protein kinase-like domain [IPRO1009] (1); S-loose glycoprotein domain [IPRO00858] (1); Serine-threonine/tyrosine-protein kinase, catalytic domain [IPRO02455] (1); EGF-like domain [IPRO00742] (1); Serine/threonine-protein kinase, active site [IPRO08271] (1); PAN/Apple domain [IPRO03699] (1); Bulb-type lectin domain [IPRO01480] (1) | scaffold_2_mRNA_2603.1          | -                           | -                               |
| GF0027269 | 1                            | 0                        | 0                            | Frataxin (1)                                                      | ferric iron binding [GO:0008199 molecular_function] (1); mitochondrion [GO:0005739 cellular_component] (1); oxidation-reduction process [GO:0055114 biological_process] (1); ferrousase activity [GO:0004322 molecular_function] (1); iron-sulfur cluster assembly [GO:0016226 biological_process] (1)                                                                  | Frataxin conserved site [IPRO20895] (1); Frataxin [IPRO17789] (1); Frataxin-CyaY [IPRO02908] (1)                                                                                                                                                                                                                                                                                                                                                     | scaffold_2_mRNA_2602.1          | -                           | -                               |
| GF0027268 | 1                            | 0                        | 0                            | Hypothetical protein (1)                                          |                                                                                                                                                                                                                                                                                                                                                                         |                                                                                                                                                                                                                                                                                                                                                                                                                                                      | scaffold_2_mRNA_260.1           | -                           | -                               |

| ID       | Num. in <i>C. clementiae</i> | Num. in <i>C. uutila</i> | Num. in <i>P. trifoliata</i> | Note                                                                                    | GO                                                                                                                                                                                                                                       | InterPro                                                                                                                                                                                                                      | Members in <i>C. clementiae</i> | Members in <i>C. uutila</i> | Members in <i>P. trifoliata</i> |
|----------|------------------------------|--------------------------|------------------------------|-----------------------------------------------------------------------------------------|------------------------------------------------------------------------------------------------------------------------------------------------------------------------------------------------------------------------------------------|-------------------------------------------------------------------------------------------------------------------------------------------------------------------------------------------------------------------------------|---------------------------------|-----------------------------|---------------------------------|
| GF002267 | 1                            | 0                        | 0                            | 0 Hypothetical protein (1)                                                              | zinc ion binding [GO:0008270 molecular_function] (1)                                                                                                                                                                                     | Zinc finger, GRF-type [IPR010666] (1)                                                                                                                                                                                         | scaffold_2_mRNA_2599.1          | -                           | -                               |
| GF002266 | 1                            | 0                        | 0                            | 0 Hypothetical protein (1)                                                              | protein phosphorylation [GO:0006468 biological_process] (1); protein kinase activity [GO:0004672 molecular_function] (1); ATP binding [GO:0005524 molecular_function] (3)                                                                | Protein kinase domain [IPR000719] (1); Protein kinase-like domain [IPR011009] (1)                                                                                                                                             | scaffold_2_mRNA_2595.1          | -                           | -                               |
| GF002265 | 1                            | 0                        | 0                            | 0 BED zinc finger, HAT family dimerisation domain (1)                                   | DNA binding [GO:0003677 molecular_function] (1); protein dimerization activity [GO:0046983 molecular_function] (1); nucleic acid binding [GO:0003676 molecular_function] (1)                                                             | hAT-like transposase, RNase-H fold [IPR025525] (1); Ribonuclease H-like domain [IPR012337] (1); HAT, C-terminal dimerisation domain [IPR008906] (1)                                                                           | scaffold_2_mRNA_2591.1          | -                           | -                               |
| GF002264 | 1                            | 0                        | 0                            | 0 Hypothetical protein (1)                                                              | protein dimerization activity [GO:0046983 molecular_function] (1); nucleic acid binding [GO:0003676 molecular_function] (1); DNA binding [GO:0003677 molecular_function] (1)                                                             | HAT, C-terminal dimerisation domain [IPR008906] (1); Zinc finger, BED-type [IPR026556] (1); Ribonuclease H-like domain [IPR012337] (1)                                                                                        | scaffold_2_mRNA_2585.1          | -                           | -                               |
| GF002263 | 1                            | 0                        | 0                            | 0 Hypothetical protein (1)                                                              |                                                                                                                                                                                                                                          | Domain of unknown function DUF4283 [IPR025558] (1)                                                                                                                                                                            | scaffold_2_mRNA_2583.1          | -                           | -                               |
| GF002262 | 1                            | 0                        | 0                            | 0 Hypothetical protein (1)                                                              |                                                                                                                                                                                                                                          | LOG family [IPR031100] (1)                                                                                                                                                                                                    | scaffold_2_mRNA_2582.1          | -                           | -                               |
| GF002261 | 1                            | 0                        | 0                            | 0 Hypothetical protein (1)                                                              |                                                                                                                                                                                                                                          | Reverse transcriptase, RNA-dependent DNA polymerase [IPR013103] (1)                                                                                                                                                           | scaffold_2_mRNA_258.1           | -                           | -                               |
| GF002260 | 1                            | 0                        | 0                            | 0 Cytokinin riboside 5'-monophosphate phosphoribohydrolase (1)                          |                                                                                                                                                                                                                                          | LOG family [IPR031100] (1)                                                                                                                                                                                                    | scaffold_2_mRNA_2579.1          | -                           | -                               |
| GF002259 | 1                            | 0                        | 0                            | 0 Equilibrative nucleoside transporter 4 (1)                                            | transport [GO:0006810 biological_process] (1); integral component of membrane [GO:0016021 cellular_component] (1); nucleoside transmembrane transporter activity [GO:0005337 molecular_function] (1)                                     | Equilibrative nucleoside transporter [IPR002259] (1); Major facilitator superfamily domain [IPR020846] (1); Nucleoside transporter, plants [IPR030200] (1)                                                                    | scaffold_2_mRNA_2574.1          | -                           | -                               |
| GF002258 | 1                            | 0                        | 0                            | 0 Hypothetical protein (1)                                                              |                                                                                                                                                                                                                                          |                                                                                                                                                                                                                               | scaffold_2_mRNA_2571.1          | -                           | -                               |
| GF002257 | 1                            | 0                        | 0                            | 0 Hypothetical protein (1)                                                              |                                                                                                                                                                                                                                          |                                                                                                                                                                                                                               | scaffold_2_mRNA_257.1           | -                           | -                               |
| GF002256 | 1                            | 0                        | 0                            | 0 Hypothetical protein (1)                                                              |                                                                                                                                                                                                                                          |                                                                                                                                                                                                                               | scaffold_2_mRNA_2567.1          | -                           | -                               |
| GF002255 | 1                            | 0                        | 0                            | 0 Hypothetical protein (1)                                                              |                                                                                                                                                                                                                                          |                                                                                                                                                                                                                               | scaffold_2_mRNA_2566.1          | -                           | -                               |
| GF002254 | 1                            | 0                        | 0                            | 0 Hypothetical protein (1)                                                              |                                                                                                                                                                                                                                          |                                                                                                                                                                                                                               | scaffold_2_mRNA_2557.1          | -                           | -                               |
| GF002253 | 1                            | 0                        | 0                            | 0 Cytokinin riboside 5'-monophosphate phosphoribohydrolase (1)                          |                                                                                                                                                                                                                                          | LOG family [IPR031100] (1)                                                                                                                                                                                                    | scaffold_2_mRNA_2556.1          | -                           | -                               |
| GF002252 | 1                            | 0                        | 0                            | 0 Hypothetical protein (1)                                                              |                                                                                                                                                                                                                                          | Protein of unknown function wound-induced [IPR022531] (1)                                                                                                                                                                     | scaffold_2_mRNA_2552.1          | -                           | -                               |
| GF002251 | 1                            | 0                        | 0                            | 0 Putative wound induced protein-like (1)                                               |                                                                                                                                                                                                                                          | Protein of unknown function wound-induced [IPR022531] (1)                                                                                                                                                                     | scaffold_2_mRNA_2551.1          | -                           | -                               |
| GF002250 | 1                            | 0                        | 0                            | 0 Hypothetical protein (1)                                                              | zinc ion binding [GO:0008270 molecular_function] (1); nucleic acid binding [GO:0003676 molecular_function] (1)                                                                                                                           | Viral movement protein [IPR028919] (1); Zinc finger, CCHC-type [IPR001878] (1)                                                                                                                                                | scaffold_2_mRNA_2550.1          | -                           | -                               |
| GF002249 | 1                            | 0                        | 0                            | 0 Hypothetical protein (1)                                                              |                                                                                                                                                                                                                                          |                                                                                                                                                                                                                               | scaffold_2_mRNA_2540.1          | -                           | -                               |
| GF002248 | 1                            | 0                        | 0                            | 0 Hypothetical protein (1)                                                              |                                                                                                                                                                                                                                          |                                                                                                                                                                                                                               | scaffold_2_mRNA_254.1           | -                           | -                               |
| GF002247 | 1                            | 0                        | 0                            | 0 Hypothetical protein (1)                                                              |                                                                                                                                                                                                                                          |                                                                                                                                                                                                                               | scaffold_2_mRNA_2539.1          | -                           | -                               |
| GF002246 | 1                            | 0                        | 0                            | 0 Hypothetical protein (1)                                                              |                                                                                                                                                                                                                                          | Viral movement protein [IPR028919] (1)                                                                                                                                                                                        | scaffold_2_mRNA_2533.1          | -                           | -                               |
| GF002245 | 1                            | 0                        | 0                            | 0 Hypothetical protein (1)                                                              |                                                                                                                                                                                                                                          |                                                                                                                                                                                                                               | scaffold_2_mRNA_2531.1          | -                           | -                               |
| GF002244 | 1                            | 0                        | 0                            | 0 Hypothetical protein (1)                                                              |                                                                                                                                                                                                                                          |                                                                                                                                                                                                                               | scaffold_2_mRNA_2529.1          | -                           | -                               |
| GF002243 | 1                            | 0                        | 0                            | 0 Cytokinin riboside 5'-monophosphate phosphoribohydrolase (1)                          |                                                                                                                                                                                                                                          | LOG family [IPR031100] (1)                                                                                                                                                                                                    | scaffold_2_mRNA_2528.1          | -                           | -                               |
| GF002242 | 1                            | 0                        | 0                            | 0 Hypothetical protein (1)                                                              |                                                                                                                                                                                                                                          |                                                                                                                                                                                                                               | scaffold_2_mRNA_2526.1          | -                           | -                               |
| GF002241 | 1                            | 0                        | 0                            | 0 Hypothetical protein (1)                                                              |                                                                                                                                                                                                                                          |                                                                                                                                                                                                                               | scaffold_2_mRNA_2525.1          | -                           | -                               |
| GF002240 | 1                            | 0                        | 0                            | 0 Hypothetical protein (1)                                                              |                                                                                                                                                                                                                                          |                                                                                                                                                                                                                               | scaffold_2_mRNA_2524.1          | -                           | -                               |
| GF002239 | 1                            | 0                        | 0                            | 0 Hypothetical protein (1)                                                              |                                                                                                                                                                                                                                          |                                                                                                                                                                                                                               | scaffold_2_mRNA_2523.1          | -                           | -                               |
| GF002238 | 1                            | 0                        | 0                            | 0 Hypothetical protein (1)                                                              |                                                                                                                                                                                                                                          |                                                                                                                                                                                                                               | scaffold_2_mRNA_2522.1          | -                           | -                               |
| GF002237 | 1                            | 0                        | 0                            | 0 Hypothetical protein (1)                                                              |                                                                                                                                                                                                                                          |                                                                                                                                                                                                                               | scaffold_2_mRNA_2521.1          | -                           | -                               |
| GF002236 | 1                            | 0                        | 0                            | 0 Cytokinin riboside 5'-monophosphate phosphoribohydrolase (1)                          |                                                                                                                                                                                                                                          | LOG family [IPR031100] (1)                                                                                                                                                                                                    | scaffold_2_mRNA_2520.1          | -                           | -                               |
| GF002235 | 1                            | 0                        | 0                            | 0 Hypothetical protein (1)                                                              |                                                                                                                                                                                                                                          | LOG family [IPR031100] (1)                                                                                                                                                                                                    | scaffold_2_mRNA_2518.1          | -                           | -                               |
| GF002234 | 1                            | 0                        | 0                            | 0 Hypothetical protein (1)                                                              |                                                                                                                                                                                                                                          | LOG family [IPR031100] (1)                                                                                                                                                                                                    | scaffold_2_mRNA_2517.1          | -                           | -                               |
| GF002233 | 1                            | 0                        | 0                            | 0 Cytokinin riboside 5'-monophosphate phosphoribohydrolase (1)                          |                                                                                                                                                                                                                                          | LOG family [IPR031100] (1)                                                                                                                                                                                                    | scaffold_2_mRNA_2516.1          | -                           | -                               |
| GF002232 | 1                            | 0                        | 0                            | 0 Hypothetical protein (1)                                                              |                                                                                                                                                                                                                                          |                                                                                                                                                                                                                               | scaffold_2_mRNA_2514.1          | -                           | -                               |
| GF002231 | 1                            | 0                        | 0                            | 0 Hypothetical protein (1)                                                              |                                                                                                                                                                                                                                          | Transposon, En/Spm-like [IPR004242] (1)                                                                                                                                                                                       | scaffold_2_mRNA_2511.1          | -                           | -                               |
| GF002230 | 1                            | 0                        | 0                            | 0 Hypothetical protein (1)                                                              |                                                                                                                                                                                                                                          |                                                                                                                                                                                                                               | scaffold_2_mRNA_2509.1          | -                           | -                               |
| GF002229 | 1                            | 0                        | 0                            | 0 Hypothetical protein (1)                                                              |                                                                                                                                                                                                                                          |                                                                                                                                                                                                                               | scaffold_2_mRNA_2504.1          | -                           | -                               |
| GF002228 | 1                            | 0                        | 0                            | 0 Hypothetical protein (1)                                                              | nucleic acid binding [GO:0003676 molecular_function] (1); protein dimerization activity [GO:0046983 molecular_function] (1)                                                                                                              | HAT, C-terminal dimerisation domain [IPR008906] (1); Ribonuclease H-like domain [IPR012337] (1)                                                                                                                               | scaffold_2_mRNA_2494.1          | -                           | -                               |
| GF002227 | 1                            | 0                        | 0                            | 0 Hypothetical protein (1)                                                              | DNA integration [GO:0015074 biological_process] (1); nucleic acid binding [GO:0003676 molecular_function] (1)                                                                                                                            | Aspartic peptidase domain [IPR021109] (1); Paramyxovirus antigen Mx [IPR026523] (1); Ribonuclease H-like domain [IPR012337] (1); Reverse transcriptase domain [IPR000477] (1); Integrase, catalytic core [IPR001584] (1)      | scaffold_2_mRNA_2489.1          | -                           | -                               |
| GF002226 | 1                            | 0                        | 0                            | 0 Hypothetical protein (1)                                                              |                                                                                                                                                                                                                                          |                                                                                                                                                                                                                               | scaffold_2_mRNA_2488.1          | -                           | -                               |
| GF002225 | 1                            | 0                        | 0                            | 0 Hypothetical protein (1)                                                              |                                                                                                                                                                                                                                          | Viral movement protein [IPR028919] (1)                                                                                                                                                                                        | scaffold_2_mRNA_2482.1          | -                           | -                               |
| GF002224 | 1                            | 0                        | 0                            | 0 Hypothetical protein (1)                                                              |                                                                                                                                                                                                                                          |                                                                                                                                                                                                                               | scaffold_2_mRNA_2479.1          | -                           | -                               |
| GF002223 | 1                            | 0                        | 0                            | 0 Hypothetical protein (1)                                                              |                                                                                                                                                                                                                                          |                                                                                                                                                                                                                               | scaffold_2_mRNA_2469.1          | -                           | -                               |
| GF002222 | 1                            | 0                        | 0                            | 0 Cytokinin riboside 5'-monophosphate phosphoribohydrolase (1)                          |                                                                                                                                                                                                                                          | Cytokinin riboside 5'-monophosphate phosphoribohydrolase LOG [IPR005269] (1); LOG family [IPR031100] (1)                                                                                                                      | scaffold_2_mRNA_2468.1          | -                           | -                               |
| GF002221 | 1                            | 0                        | 0                            | 0 Hypothetical protein (1)                                                              |                                                                                                                                                                                                                                          |                                                                                                                                                                                                                               | scaffold_2_mRNA_2467.1          | -                           | -                               |
| GF002220 | 1                            | 0                        | 0                            | 0 Hypothetical protein (1)                                                              |                                                                                                                                                                                                                                          |                                                                                                                                                                                                                               | scaffold_2_mRNA_2466.1          | -                           | -                               |
| GF002219 | 1                            | 0                        | 0                            | 0 Hypothetical protein (1)                                                              |                                                                                                                                                                                                                                          |                                                                                                                                                                                                                               | scaffold_2_mRNA_2465.1          | -                           | -                               |
| GF002218 | 1                            | 0                        | 0                            | 0 Hypothetical protein (1)                                                              |                                                                                                                                                                                                                                          |                                                                                                                                                                                                                               | scaffold_2_mRNA_2463.1          | -                           | -                               |
| GF002217 | 1                            | 0                        | 0                            | 0 Hypothetical protein (1)                                                              | zinc ion binding [GO:0008270 molecular_function] (1); aspartic-type endopeptidase activity [GO:0004190 molecular_function] (1); nucleic acid binding [GO:0003676 molecular_function] (1); protolysis [GO:0006508 biological_process] (1) | Peptidase A2A, retrovirus, catalytic [IPR010955] (1); Viral movement protein [IPR028919] (1); Reverse transcriptase domain [IPR000477] (1); Zinc finger, CCHC-type [IPR001878] (1); Aspartic peptidase domain [IPR021109] (1) | scaffold_2_mRNA_2462.1          | -                           | -                               |
| GF002216 | 1                            | 0                        | 0                            | 0 Hypothetical protein (1)                                                              |                                                                                                                                                                                                                                          |                                                                                                                                                                                                                               | scaffold_2_mRNA_2461.1          | -                           | -                               |
| GF002215 | 1                            | 0                        | 0                            | 0 Cytokinin riboside 5'-monophosphate phosphoribohydrolase (1)                          |                                                                                                                                                                                                                                          | LOG family [IPR031100] (1)                                                                                                                                                                                                    | scaffold_2_mRNA_2460.1          | -                           | -                               |
| GF002214 | 1                            | 0                        | 0                            | 0 Hypothetical protein (1)                                                              |                                                                                                                                                                                                                                          |                                                                                                                                                                                                                               | scaffold_2_mRNA_2457.1          | -                           | -                               |
| GF002213 | 1                            | 0                        | 0                            | 0 Hypothetical protein (1)                                                              |                                                                                                                                                                                                                                          |                                                                                                                                                                                                                               | scaffold_2_mRNA_2452.1          | -                           | -                               |
| GF002212 | 1                            | 0                        | 0                            | 0 Hypothetical protein (1)                                                              |                                                                                                                                                                                                                                          |                                                                                                                                                                                                                               | scaffold_2_mRNA_2451.1          | -                           | -                               |
| GF002211 | 1                            | 0                        | 0                            | 0 Hypothetical protein (1)                                                              |                                                                                                                                                                                                                                          |                                                                                                                                                                                                                               | scaffold_2_mRNA_2448.1          | -                           | -                               |
| GF002210 | 1                            | 0                        | 0                            | 0 Hypothetical protein (1)                                                              |                                                                                                                                                                                                                                          |                                                                                                                                                                                                                               | scaffold_2_mRNA_2446.1          | -                           | -                               |
| GF002209 | 1                            | 0                        | 0                            | 0 Hypothetical protein (1)                                                              |                                                                                                                                                                                                                                          |                                                                                                                                                                                                                               | scaffold_2_mRNA_2442.1          | -                           | -                               |
| GF002208 | 1                            | 0                        | 0                            | 0 Hypothetical protein (1)                                                              |                                                                                                                                                                                                                                          |                                                                                                                                                                                                                               | scaffold_2_mRNA_2441.1          | -                           | -                               |
| GF002207 | 1                            | 0                        | 0                            | 0 Hypothetical protein (1)                                                              |                                                                                                                                                                                                                                          |                                                                                                                                                                                                                               | scaffold_2_mRNA_2440.1          | -                           | -                               |
| GF002206 | 1                            | 0                        | 0                            | 0 Hypothetical protein (1)                                                              |                                                                                                                                                                                                                                          |                                                                                                                                                                                                                               | scaffold_2_mRNA_2439.1          | -                           | -                               |
| GF002205 | 1                            | 0                        | 0                            | 0 Hypothetical protein (1)                                                              |                                                                                                                                                                                                                                          |                                                                                                                                                                                                                               | scaffold_2_mRNA_2438.1          | -                           | -                               |
| GF002204 | 1                            | 0                        | 0                            | 0 Hypothetical protein (1)                                                              | nucleic acid binding [GO:0003676 molecular_function] (1)                                                                                                                                                                                 | Ribonuclease H-like domain [IPR012337] (1)                                                                                                                                                                                    | scaffold_2_mRNA_2437.1          | -                           | -                               |
| GF002203 | 1                            | 0                        | 0                            | 0 Hypothetical protein (1)                                                              |                                                                                                                                                                                                                                          | Reverse transcriptase domain [IPR000477] (1)                                                                                                                                                                                  | scaffold_2_mRNA_2432.1          | -                           | -                               |
| GF002202 | 1                            | 0                        | 0                            | 0 Hypothetical protein (1)                                                              |                                                                                                                                                                                                                                          |                                                                                                                                                                                                                               | scaffold_2_mRNA_2427.1          | -                           | -                               |
| GF002201 | 1                            | 0                        | 0                            | 0 Hypothetical protein (1)                                                              | nucleic acid binding [GO:0003676 molecular_function] (1); zinc ion binding [GO:0008270 molecular_function] (1)                                                                                                                           | Zinc finger, CCHC-type [IPR001878] (1)                                                                                                                                                                                        | scaffold_2_mRNA_2426.1          | -                           | -                               |
| GF002200 | 1                            | 0                        | 0                            | 0 Hypothetical protein (1)                                                              |                                                                                                                                                                                                                                          |                                                                                                                                                                                                                               | scaffold_2_mRNA_2425.1          | -                           | -                               |
| GF002199 | 1                            | 0                        | 0                            | 0 Putative polyprotein (Aspartic proteinase, reverse transcriptase, ribonuclease H) (1) |                                                                                                                                                                                                                                          | Retroposins [IPR018061] (1); Reverse transcriptase domain [IPR000477] (1); Aspartic peptidase domain [IPR021109] (1)                                                                                                          | scaffold_2_mRNA_2421.1          | -                           | -                               |
| GF002198 | 1                            | 0                        | 0                            | 0 Hypothetical protein (1)                                                              |                                                                                                                                                                                                                                          |                                                                                                                                                                                                                               | scaffold_2_mRNA_2418.1          | -                           | -                               |
| GF002197 | 1                            | 0                        | 0                            | 0 Hypothetical protein (1)                                                              |                                                                                                                                                                                                                                          | Reverse transcriptase domain [IPR000477] (1)                                                                                                                                                                                  | scaffold_2_mRNA_2410.1          | -                           | -                               |
| GF002196 | 1                            | 0                        | 0                            | 0 Hypothetical protein (1)                                                              |                                                                                                                                                                                                                                          |                                                                                                                                                                                                                               | scaffold_2_mRNA_2407.1          | -                           | -                               |
| GF002195 | 1                            | 0                        | 0                            | 0 Hypothetical protein (1)                                                              |                                                                                                                                                                                                                                          | Viral movement protein [IPR028919] (1)                                                                                                                                                                                        | scaffold_2_mRNA_2395.1          | -                           | -                               |
| GF002194 | 1                            | 0                        | 0                            | 0 Hypothetical protein (1)                                                              |                                                                                                                                                                                                                                          |                                                                                                                                                                                                                               | scaffold_2_mRNA_2393.1          | -                           | -                               |
| GF002193 | 1                            | 0                        | 0                            | 0 Hypothetical protein (1)                                                              |                                                                                                                                                                                                                                          |                                                                                                                                                                                                                               | scaffold_2_mRNA_2380.1          | -                           | -                               |
| GF002192 | 1                            | 0                        | 0                            | 0 Hypothetical protein (1)                                                              |                                                                                                                                                                                                                                          |                                                                                                                                                                                                                               | scaffold_2_mRNA_238.1           | -                           | -                               |
| GF002191 | 1                            | 0                        | 0                            | 0 Hypothetical protein (1)                                                              |                                                                                                                                                                                                                                          |                                                                                                                                                                                                                               | scaffold_2_mRNA_2379.1          | -                           | -                               |
| GF002190 | 1                            | 0                        | 0                            | 0 Hypothetical protein (1)                                                              |                                                                                                                                                                                                                                          |                                                                                                                                                                                                                               | scaffold_2_mRNA_2378.1          | -                           | -                               |
| GF002189 | 1                            | 0                        | 0                            | 0 Hypothetical protein (1)                                                              |                                                                                                                                                                                                                                          |                                                                                                                                                                                                                               | scaffold_2_mRNA_2375.1          | -                           | -                               |
| GF002188 | 1                            | 0                        | 0                            | 0 Hypothetical protein (1)                                                              |                                                                                                                                                                                                                                          | Reverse transcriptase domain [IPR000477] (1)                                                                                                                                                                                  | scaffold_2_mRNA_2373.1          | -                           | -                               |

| ID        | Num. in <i>C. clementinae</i> | Num. in <i>C. uastha</i> | Num. in <i>P. trifoliata</i> | Note                                                           | GO                                                                                                                                             | InterPro                                                                                                 | Members in <i>C. clementinae</i> | Members in <i>C. uastha</i> | Members in <i>P. trifoliata</i> |
|-----------|-------------------------------|--------------------------|------------------------------|----------------------------------------------------------------|------------------------------------------------------------------------------------------------------------------------------------------------|----------------------------------------------------------------------------------------------------------|----------------------------------|-----------------------------|---------------------------------|
| GF0027187 | 1                             | 0                        | 0                            | 0 Hypothetical protein (1)                                     |                                                                                                                                                |                                                                                                          | scaffold_2_mRNA_2372.1           | -                           | -                               |
| GF0027186 | 1                             | 0                        | 0                            | 0 Hypothetical protein (1)                                     |                                                                                                                                                |                                                                                                          | scaffold_2_mRNA_2371.1           | -                           | -                               |
| GF0027185 | 1                             | 0                        | 0                            | 0 Hypothetical protein (1)                                     |                                                                                                                                                |                                                                                                          | scaffold_2_mRNA_2369.1           | -                           | -                               |
| GF0027184 | 1                             | 0                        | 0                            | 0 Hypothetical protein (1)                                     |                                                                                                                                                |                                                                                                          | scaffold_2_mRNA_2368.1           | -                           | -                               |
| GF0027183 | 1                             | 0                        | 0                            | 0 Hypothetical protein (1)                                     |                                                                                                                                                | Viral movement protein [IPRO28919] (1)                                                                   | scaffold_2_mRNA_2367.1           | -                           | -                               |
| GF0027182 | 1                             | 0                        | 0                            | 0 Hypothetical protein (1)                                     |                                                                                                                                                | Viral movement protein [IPRO28919] (1)                                                                   | scaffold_2_mRNA_2365.1           | -                           | -                               |
| GF0027181 | 1                             | 0                        | 0                            | 0 Hypothetical protein (1)                                     |                                                                                                                                                |                                                                                                          | scaffold_2_mRNA_2363.1           | -                           | -                               |
| GF0027180 | 1                             | 0                        | 0                            | 0 Hypothetical protein (1)                                     |                                                                                                                                                |                                                                                                          | scaffold_2_mRNA_2358.1           | -                           | -                               |
| GF0027179 | 1                             | 0                        | 0                            | 0 Hypothetical protein (1)                                     |                                                                                                                                                |                                                                                                          | scaffold_2_mRNA_2355.1           | -                           | -                               |
| GF0027178 | 1                             | 0                        | 0                            | 0 Hypothetical protein (1)                                     |                                                                                                                                                |                                                                                                          | scaffold_2_mRNA_2354.1           | -                           | -                               |
| GF0027177 | 1                             | 0                        | 0                            | 0 Putative retroelement polypeptide (1)                        |                                                                                                                                                |                                                                                                          | scaffold_2_mRNA_2351.1           | -                           | -                               |
| GF0027176 | 1                             | 0                        | 0                            | 0 Hypothetical protein (1)                                     |                                                                                                                                                |                                                                                                          | scaffold_2_mRNA_2350.1           | -                           | -                               |
| GF0027175 | 1                             | 0                        | 0                            | 0 Hypothetical protein (1)                                     |                                                                                                                                                |                                                                                                          | scaffold_2_mRNA_2341.1           | -                           | -                               |
| GF0027174 | 1                             | 0                        | 0                            | 0 Hypothetical protein (1)                                     | zinc ion binding [GO:0008270]<br>molecular_function (1); nucleic acid binding [GO:0003676]<br>molecular_function (1)                           | Zinc finger, CCHC-type [IPRO01878] (1)                                                                   | scaffold_2_mRNA_2340.1           | -                           | -                               |
| GF0027173 | 1                             | 0                        | 0                            | 0 Hypothetical protein (1)                                     |                                                                                                                                                |                                                                                                          | scaffold_2_mRNA_2334.1           | -                           | -                               |
| GF0027172 | 1                             | 0                        | 0                            | 0 Hypothetical protein (1)                                     |                                                                                                                                                | Viral movement protein [IPRO28919] (1)                                                                   | scaffold_2_mRNA_2330.1           | -                           | -                               |
| GF0027171 | 1                             | 0                        | 0                            | 0 Hypothetical protein (1)                                     |                                                                                                                                                |                                                                                                          | scaffold_2_mRNA_2328.1           | -                           | -                               |
| GF0027170 | 1                             | 0                        | 0                            | 0 Hypothetical protein (1)                                     |                                                                                                                                                |                                                                                                          | scaffold_2_mRNA_2326.1           | -                           | -                               |
| GF0027169 | 1                             | 0                        | 0                            | 0 Hypothetical protein (1)                                     |                                                                                                                                                |                                                                                                          | scaffold_2_mRNA_2324.1           | -                           | -                               |
| GF0027168 | 1                             | 0                        | 0                            | 0 Hypothetical protein (1)                                     |                                                                                                                                                |                                                                                                          | scaffold_2_mRNA_2320.1           | -                           | -                               |
| GF0027167 | 1                             | 0                        | 0                            | 0 Hypothetical protein (1)                                     |                                                                                                                                                |                                                                                                          | scaffold_2_mRNA_2319.1           | -                           | -                               |
| GF0027166 | 1                             | 0                        | 0                            | 0 Hypothetical protein (1)                                     |                                                                                                                                                |                                                                                                          | scaffold_2_mRNA_2316.1           | -                           | -                               |
| GF0027165 | 1                             | 0                        | 0                            | 0 Hypothetical protein (1)                                     |                                                                                                                                                |                                                                                                          | scaffold_2_mRNA_2313.1           | -                           | -                               |
| GF0027164 | 1                             | 0                        | 0                            | 0 Hypothetical protein (1)                                     |                                                                                                                                                |                                                                                                          | scaffold_2_mRNA_2311.1           | -                           | -                               |
| GF0027163 | 1                             | 0                        | 0                            | 0 Hypothetical protein (1)                                     |                                                                                                                                                |                                                                                                          | scaffold_2_mRNA_2303.1           | -                           | -                               |
| GF0027162 | 1                             | 0                        | 0                            | 0 Hypothetical protein (1)                                     |                                                                                                                                                |                                                                                                          | scaffold_2_mRNA_2302.1           | -                           | -                               |
| GF0027161 | 1                             | 0                        | 0                            | 0 Hypothetical protein (1)                                     |                                                                                                                                                | Retrotransposon gag domain [IPRO05162] (1)                                                               | scaffold_2_mRNA_2301.1           | -                           | -                               |
| GF0027160 | 1                             | 0                        | 0                            | 0 Hypothetical protein (1)                                     |                                                                                                                                                |                                                                                                          | scaffold_2_mRNA_2294.1           | -                           | -                               |
| GF0027159 | 1                             | 0                        | 0                            | 0 Hypothetical protein (1)                                     |                                                                                                                                                |                                                                                                          | scaffold_2_mRNA_2292.1           | -                           | -                               |
| GF0027158 | 1                             | 0                        | 0                            | 0 Hypothetical protein (1)                                     |                                                                                                                                                |                                                                                                          | scaffold_2_mRNA_2289.1           | -                           | -                               |
| GF0027157 | 1                             | 0                        | 0                            | 0 Hypothetical protein (1)                                     |                                                                                                                                                |                                                                                                          | scaffold_2_mRNA_2286.1           | -                           | -                               |
| GF0027156 | 1                             | 0                        | 0                            | 0 Cytokinin riboside 5'-monophosphate phosphoribohydrolase (1) |                                                                                                                                                | LOG family [IPRO31100] (1)                                                                               | scaffold_2_mRNA_2285.1           | -                           | -                               |
| GF0027155 | 1                             | 0                        | 0                            | 0 Hypothetical protein (1)                                     | regulation of transcription, DNA-templated [GO:0006355]<br>biological_process (1); nucleic acid binding [GO:0003676]<br>molecular_function (1) | Retrotransposon gag domain [IPRO05162] (1); Carlavirus nucleic acid-binding protein [IPRO25588] (1)      | scaffold_2_mRNA_2284.1           | -                           | -                               |
| GF0027154 | 1                             | 0                        | 0                            | 0 Hypothetical protein (1)                                     |                                                                                                                                                | Retrotransposon gag domain [IPRO05162] (1)                                                               | scaffold_2_mRNA_2282.1           | -                           | -                               |
| GF0027153 | 1                             | 0                        | 0                            | 0 Hypothetical protein (1)                                     |                                                                                                                                                |                                                                                                          | scaffold_2_mRNA_2274.1           | -                           | -                               |
| GF0027152 | 1                             | 0                        | 0                            | 0 Hypothetical protein (1)                                     |                                                                                                                                                | Reverse transcriptase domain [IPRO00477] (1)                                                             | scaffold_2_mRNA_2273.1           | -                           | -                               |
| GF0027151 | 1                             | 0                        | 0                            | 0 Hypothetical protein (1)                                     | nucleic acid binding [GO:0003676]<br>molecular_function (1); zinc ion binding [GO:0008270]<br>molecular_function (1)                           | Zinc finger, CCHC-type [IPRO01878] (1)                                                                   | scaffold_2_mRNA_2270.1           | -                           | -                               |
| GF0027150 | 1                             | 0                        | 0                            | 0 Retrotransposon gag protein (1)                              |                                                                                                                                                |                                                                                                          | scaffold_2_mRNA_2271.1           | -                           | -                               |
| GF0027149 | 1                             | 0                        | 0                            | 0 Hypothetical protein (1)                                     |                                                                                                                                                |                                                                                                          | scaffold_2_mRNA_2269.1           | -                           | -                               |
| GF0027148 | 1                             | 0                        | 0                            | 0 Hypothetical protein (1)                                     |                                                                                                                                                |                                                                                                          | scaffold_2_mRNA_2268.1           | -                           | -                               |
| GF0027147 | 1                             | 0                        | 0                            | 0 Hypothetical protein (1)                                     |                                                                                                                                                |                                                                                                          | scaffold_2_mRNA_2267.1           | -                           | -                               |
| GF0027146 | 1                             | 0                        | 0                            | 0 Hypothetical protein (1)                                     |                                                                                                                                                |                                                                                                          | scaffold_2_mRNA_2266.1           | -                           | -                               |
| GF0027145 | 1                             | 0                        | 0                            | 0 Hypothetical protein (1)                                     |                                                                                                                                                |                                                                                                          | scaffold_2_mRNA_2264.1           | -                           | -                               |
| GF0027144 | 1                             | 0                        | 0                            | 0 Cytokinin riboside 5'-monophosphate phosphoribohydrolase (1) |                                                                                                                                                | LOG family [IPRO31100] (1)                                                                               | scaffold_2_mRNA_2263.1           | -                           | -                               |
| GF0027143 | 1                             | 0                        | 0                            | 0 Hypothetical protein (1)                                     |                                                                                                                                                |                                                                                                          | scaffold_2_mRNA_2261.1           | -                           | -                               |
| GF0027142 | 1                             | 0                        | 0                            | 0 Cytokinin riboside 5'-monophosphate phosphoribohydrolase (1) |                                                                                                                                                | LOG family [IPRO31100] (1); Cytokinin riboside 5'-monophosphate phosphoribohydrolase LOG [IPRO05269] (1) | scaffold_2_mRNA_2260.1           | -                           | -                               |
| GF0027141 | 1                             | 0                        | 0                            | 0 Hypothetical protein (1)                                     |                                                                                                                                                |                                                                                                          | scaffold_2_mRNA_2261.1           | -                           | -                               |
| GF0027140 | 1                             | 0                        | 0                            | 0 Hypothetical protein (1)                                     |                                                                                                                                                |                                                                                                          | scaffold_2_mRNA_2255.1           | -                           | -                               |
| GF0027139 | 1                             | 0                        | 0                            | 0 Hypothetical protein (1)                                     |                                                                                                                                                |                                                                                                          | scaffold_2_mRNA_2251.1           | -                           | -                               |
| GF0027138 | 1                             | 0                        | 0                            | 0 Hypothetical protein (1)                                     |                                                                                                                                                |                                                                                                          | scaffold_2_mRNA_2247.1           | -                           | -                               |
| GF0027137 | 1                             | 0                        | 0                            | 0 Hypothetical protein (1)                                     |                                                                                                                                                |                                                                                                          | scaffold_2_mRNA_2245.1           | -                           | -                               |
| GF0027136 | 1                             | 0                        | 0                            | 0 Hypothetical protein (1)                                     |                                                                                                                                                |                                                                                                          | scaffold_2_mRNA_2244.1           | -                           | -                               |
| GF0027135 | 1                             | 0                        | 0                            | 0 Hypothetical protein (1)                                     |                                                                                                                                                |                                                                                                          | scaffold_2_mRNA_2243.1           | -                           | -                               |
| GF0027134 | 1                             | 0                        | 0                            | 0 Hypothetical protein (1)                                     |                                                                                                                                                | Viral movement protein [IPRO28919] (1)                                                                   | scaffold_2_mRNA_2242.1           | -                           | -                               |
| GF0027133 | 1                             | 0                        | 0                            | 0 Hypothetical protein (1)                                     |                                                                                                                                                |                                                                                                          | scaffold_2_mRNA_2233.1           | -                           | -                               |
| GF0027132 | 1                             | 0                        | 0                            | 0 Hypothetical protein (1)                                     |                                                                                                                                                |                                                                                                          | scaffold_2_mRNA_2225.1           | -                           | -                               |
| GF0027131 | 1                             | 0                        | 0                            | 0 Hypothetical protein (1)                                     |                                                                                                                                                |                                                                                                          | scaffold_2_mRNA_2224.1           | -                           | -                               |
| GF0027130 | 1                             | 0                        | 0                            | 0 Cytokinin riboside 5'-monophosphate phosphoribohydrolase (1) |                                                                                                                                                | Cytokinin riboside 5'-monophosphate phosphoribohydrolase LOG [IPRO05269] (1); LOG family [IPRO31100] (1) | scaffold_2_mRNA_2222.1           | -                           | -                               |
| GF0027129 | 1                             | 0                        | 0                            | 0 Hypothetical protein (1)                                     |                                                                                                                                                |                                                                                                          | scaffold_2_mRNA_2220.1           | -                           | -                               |
| GF0027128 | 1                             | 0                        | 0                            | 0 Hypothetical protein (1)                                     |                                                                                                                                                | Domain of unknown function DUF4219 [IPRO25314] (1)                                                       | scaffold_2_mRNA_2219.1           | -                           | -                               |
| GF0027127 | 1                             | 0                        | 0                            | 0 Hypothetical protein (1)                                     |                                                                                                                                                |                                                                                                          | scaffold_2_mRNA_2218.1           | -                           | -                               |
| GF0027126 | 1                             | 0                        | 0                            | 0 Hypothetical protein (1)                                     |                                                                                                                                                |                                                                                                          | scaffold_2_mRNA_2217.1           | -                           | -                               |
| GF0027125 | 1                             | 0                        | 0                            | 0 Cytokinin riboside 5'-monophosphate phosphoribohydrolase (1) |                                                                                                                                                | LOG family [IPRO31100] (1); Cytokinin riboside 5'-monophosphate phosphoribohydrolase LOG [IPRO05269] (1) | scaffold_2_mRNA_2216.1           | -                           | -                               |
| GF0027124 | 1                             | 0                        | 0                            | 0 Hypothetical protein (1)                                     |                                                                                                                                                |                                                                                                          | scaffold_2_mRNA_2215.1           | -                           | -                               |
| GF0027123 | 1                             | 0                        | 0                            | 0 Hypothetical protein (1)                                     |                                                                                                                                                |                                                                                                          | scaffold_2_mRNA_2214.1           | -                           | -                               |
| GF0027122 | 1                             | 0                        | 0                            | 0 Cytokinin riboside 5'-monophosphate phosphoribohydrolase (1) |                                                                                                                                                | LOG family [IPRO31100] (1)                                                                               | scaffold_2_mRNA_2213.1           | -                           | -                               |
| GF0027121 | 1                             | 0                        | 0                            | 0 Hypothetical protein (1)                                     |                                                                                                                                                | Ribosomal protein L9/RNase H1, N-terminal [IPRO09027] (1); Ribonuclease H1, N-terminal [IPRO11320] (1)   | scaffold_2_mRNA_2210.1           | -                           | -                               |
| GF0027120 | 1                             | 0                        | 0                            | 0 Hypothetical protein (1)                                     |                                                                                                                                                | Aspartic peptidase domain [IPRO21109] (1)                                                                | scaffold_2_mRNA_2202.1           | -                           | -                               |
| GF0027119 | 1                             | 0                        | 0                            | 0 Hypothetical protein (1)                                     |                                                                                                                                                |                                                                                                          | scaffold_2_mRNA_2198.1           | -                           | -                               |
| GF0027118 | 1                             | 0                        | 0                            | 0 Hypothetical protein (1)                                     | nucleic acid binding [GO:0003676]<br>molecular_function (1); zinc ion binding [GO:0008270]<br>molecular_function (1)                           | Zinc finger, CCHC-type [IPRO01878] (1)                                                                   | scaffold_2_mRNA_2196.1           | -                           | -                               |
| GF0027117 | 1                             | 0                        | 0                            | 0 Hypothetical protein (1)                                     |                                                                                                                                                |                                                                                                          | scaffold_2_mRNA_2191.1           | -                           | -                               |
| GF0027116 | 1                             | 0                        | 0                            | 0 Hypothetical protein (1)                                     |                                                                                                                                                |                                                                                                          | scaffold_2_mRNA_2191.1           | -                           | -                               |
| GF0027115 | 1                             | 0                        | 0                            | 0 Hypothetical protein (1)                                     |                                                                                                                                                |                                                                                                          | scaffold_2_mRNA_2189.1           | -                           | -                               |
| GF0027114 | 1                             | 0                        | 0                            | 0 Hypothetical protein (1)                                     |                                                                                                                                                |                                                                                                          | scaffold_2_mRNA_2188.1           | -                           | -                               |
| GF0027113 | 1                             | 0                        | 0                            | 0 Hypothetical protein (1)                                     |                                                                                                                                                |                                                                                                          | scaffold_2_mRNA_2187.1           | -                           | -                               |
| GF0027112 | 1                             | 0                        | 0                            | 0 Hypothetical protein (1)                                     |                                                                                                                                                |                                                                                                          | scaffold_2_mRNA_2186.1           | -                           | -                               |
| GF0027111 | 1                             | 0                        | 0                            | 0 Cytokinin riboside 5'-monophosphate phosphoribohydrolase (1) |                                                                                                                                                | LOG family [IPRO31100] (1)                                                                               | scaffold_2_mRNA_2185.1           | -                           | -                               |
| GF0027110 | 1                             | 0                        | 0                            | 0 Hypothetical protein (1)                                     |                                                                                                                                                |                                                                                                          | scaffold_2_mRNA_2184.1           | -                           | -                               |
| GF0027109 | 1                             | 0                        | 0                            | 0 Cytokinin riboside 5'-monophosphate phosphoribohydrolase (1) |                                                                                                                                                | LOG family [IPRO31100] (1)                                                                               | scaffold_2_mRNA_2183.1           | -                           | -                               |
| GF0027108 | 1                             | 0                        | 0                            | 0 Hypothetical protein (1)                                     |                                                                                                                                                |                                                                                                          | scaffold_2_mRNA_2179.1           | -                           | -                               |
| GF0027107 | 1                             | 0                        | 0                            | 0 Cytokinin riboside 5'-monophosphate phosphoribohydrolase (1) |                                                                                                                                                | LOG family [IPRO31100] (1); Cytokinin riboside 5'-monophosphate phosphoribohydrolase LOG [IPRO05269] (1) | scaffold_2_mRNA_2177.1           | -                           | -                               |
| GF0027106 | 1                             | 0                        | 0                            | 0 Hypothetical protein (1)                                     |                                                                                                                                                |                                                                                                          | scaffold_2_mRNA_2176.1           | -                           | -                               |
| GF0027105 | 1                             | 0                        | 0                            | 0 Hypothetical protein (1)                                     |                                                                                                                                                |                                                                                                          | scaffold_2_mRNA_2175.1           | -                           | -                               |
| GF0027104 | 1                             | 0                        | 0                            | 0 Hypothetical protein (1)                                     |                                                                                                                                                |                                                                                                          | scaffold_2_mRNA_2174.1           | -                           | -                               |
| GF0027103 | 1                             | 0                        | 0                            | 0 Cytokinin riboside 5'-monophosphate phosphoribohydrolase (1) |                                                                                                                                                | Cytokinin riboside 5'-monophosphate phosphoribohydrolase LOG [IPRO05269] (1); LOG family [IPRO31100] (1) | scaffold_2_mRNA_2173.1           | -                           | -                               |
| GF0027102 | 1                             | 0                        | 0                            | 0 Hypothetical protein (1)                                     |                                                                                                                                                |                                                                                                          | scaffold_2_mRNA_2172.1           | -                           | -                               |
| GF0027101 | 1                             | 0                        | 0                            | 0 Hypothetical protein (1)                                     |                                                                                                                                                |                                                                                                          | scaffold_2_mRNA_2171.1           | -                           | -                               |
| GF0027100 | 1                             | 0                        | 0                            | 0 Hypothetical protein (1)                                     |                                                                                                                                                |                                                                                                          | scaffold_2_mRNA_2168.1           | -                           | -                               |
| GF0027099 | 1                             | 0                        | 0                            | 0 Cytokinin riboside 5'-monophosphate phosphoribohydrolase (1) |                                                                                                                                                | LOG family [IPRO31100] (1); Cytokinin riboside 5'-monophosphate phosphoribohydrolase LOG [IPRO05269] (1) | scaffold_2_mRNA_2167.1           | -                           | -                               |
| GF0027098 | 1                             | 0                        | 0                            | 0 Hypothetical protein (1)                                     |                                                                                                                                                |                                                                                                          | scaffold_2_mRNA_2162.1           | -                           | -                               |
| GF0027097 | 1                             | 0                        | 0                            | 0 Hypothetical protein (1)                                     |                                                                                                                                                | LOG family [IPRO31100] (1)                                                                               | scaffold_2_mRNA_2161.1           | -                           | -                               |
| GF0027096 | 1                             | 0                        | 0                            | 0 Hypothetical protein (1)                                     |                                                                                                                                                |                                                                                                          | scaffold_2_mRNA_2155.1           | -                           | -                               |
| GF0027095 | 1                             | 0                        | 0                            | 0 Hypothetical protein (1)                                     |                                                                                                                                                | Zinc knuckle CX2CX4HX4C [IPRO25836] (1)                                                                  | scaffold_2_mRNA_2153.1           | -                           | -                               |

| ID        | Num. in <i>C. clementiae</i> | Num. in <i>C. uatchii</i> | Num. in <i>P. trifoliata</i> | Note                                                           | GO                                                                                                                                                                                                                                    | InterPro                                                                                                                                                                                                                                                                     | Members in <i>C. clementiae</i> | Members in <i>C. uatchii</i> | Members in <i>P. trifoliata</i> |
|-----------|------------------------------|---------------------------|------------------------------|----------------------------------------------------------------|---------------------------------------------------------------------------------------------------------------------------------------------------------------------------------------------------------------------------------------|------------------------------------------------------------------------------------------------------------------------------------------------------------------------------------------------------------------------------------------------------------------------------|---------------------------------|------------------------------|---------------------------------|
| GF0027094 | 1                            | 0                         | 0                            | 0 Hypothetical protein (1)                                     | nucleic acid binding [GO:0003676 molecular_function] (1); regulation of transcription, DNA-templated [GO:0006355 biological_process] (1)                                                                                              | Carboxy nuclear acid-binding protein [IPRO02568] (1)                                                                                                                                                                                                                         | scaffold_2_mRNA_2152.1          | -                            | -                               |
| GF0027093 | 1                            | 0                         | 0                            | 0 Cytokinin riboside 5'-monophosphate phosphoribohydrolase (1) |                                                                                                                                                                                                                                       | LOG family [IPRO31100] (1)                                                                                                                                                                                                                                                   | scaffold_2_mRNA_2151.1          | -                            | -                               |
| GF0027092 | 1                            | 0                         | 0                            | 0 Hypothetical protein (1)                                     |                                                                                                                                                                                                                                       |                                                                                                                                                                                                                                                                              | scaffold_2_mRNA_215.1           | -                            | -                               |
| GF0027091 | 1                            | 0                         | 0                            | 0 Hypothetical protein (1)                                     |                                                                                                                                                                                                                                       |                                                                                                                                                                                                                                                                              | scaffold_2_mRNA_2148.1          | -                            | -                               |
| GF0027090 | 1                            | 0                         | 0                            | 0 Hypothetical protein (1)                                     |                                                                                                                                                                                                                                       | LOG family [IPRO31100] (1)                                                                                                                                                                                                                                                   | scaffold_2_mRNA_2146.1          | -                            | -                               |
| GF0027089 | 1                            | 0                         | 0                            | 0 Putative Ty3-gypsy-like retroelement polypeptide (1)         | nucleic acid binding [GO:0003676 molecular_function] (1)                                                                                                                                                                              | Ribonuclease H-like domain [IPRO12337] (1)                                                                                                                                                                                                                                   | scaffold_2_mRNA_2142.1          | -                            | -                               |
| GF0027088 | 1                            | 0                         | 0                            | 0 Hypothetical protein (1)                                     |                                                                                                                                                                                                                                       |                                                                                                                                                                                                                                                                              | scaffold_2_mRNA_214.1           | -                            | -                               |
| GF0027087 | 1                            | 0                         | 0                            | 0 Hypothetical protein (1)                                     |                                                                                                                                                                                                                                       | Aspartic peptidase domain [IPRO21109] (1)                                                                                                                                                                                                                                    | scaffold_2_mRNA_2139.1          | -                            | -                               |
| GF0027086 | 1                            | 0                         | 0                            | 0 Hypothetical protein (1)                                     |                                                                                                                                                                                                                                       |                                                                                                                                                                                                                                                                              | scaffold_2_mRNA_2138.1          | -                            | -                               |
| GF0027085 | 1                            | 0                         | 0                            | 0 Hypothetical protein (1)                                     | proteolysis [GO:0006508 biological_process] (1); cysteine-type peptidase activity [GO:0008234 molecular_function] (1)                                                                                                                 | Upl1 protease family, C-terminal catalytic domain [IPRO03653] (1); Probable transposase, Pta En Spm, plant [IPRO04252] (1); Transposon, Era-Spm-like [IPRO04242] (1); Domain of unknown function DUF4218 [IPRO25452] (1); Domain of unknown function DUF4216 [IPRO25312] (1) | scaffold_2_mRNA_2131.1          | -                            | -                               |
| GF0027084 | 1                            | 0                         | 0                            | 0 Hypothetical protein (1)                                     |                                                                                                                                                                                                                                       |                                                                                                                                                                                                                                                                              | scaffold_2_mRNA_2130.1          | -                            | -                               |
| GF0027083 | 1                            | 0                         | 0                            | 0 Hypothetical protein (1)                                     |                                                                                                                                                                                                                                       |                                                                                                                                                                                                                                                                              | scaffold_2_mRNA_213.1           | -                            | -                               |
| GF0027082 | 1                            | 0                         | 0                            | 0 Hypothetical protein (1)                                     | zinc ion binding [GO:0008270 molecular_function] (1); nucleic acid binding [GO:0003676 molecular_function] (1)                                                                                                                        | Zinc finger, CCHC-type [IPRO01878] (1)                                                                                                                                                                                                                                       | scaffold_2_mRNA_2126.1          | -                            | -                               |
| GF0027081 | 1                            | 0                         | 0                            | 0 Hypothetical protein (1)                                     |                                                                                                                                                                                                                                       |                                                                                                                                                                                                                                                                              | scaffold_2_mRNA_2125.1          | -                            | -                               |
| GF0027080 | 1                            | 0                         | 0                            | 0 Cytokinin riboside 5'-monophosphate phosphoribohydrolase (1) |                                                                                                                                                                                                                                       | LOG family [IPRO31100] (1)                                                                                                                                                                                                                                                   | scaffold_2_mRNA_2124.1          | -                            | -                               |
| GF0027079 | 1                            | 0                         | 0                            | 0 Hypothetical protein (1)                                     |                                                                                                                                                                                                                                       |                                                                                                                                                                                                                                                                              | scaffold_2_mRNA_2123.1          | -                            | -                               |
| GF0027078 | 1                            | 0                         | 0                            | 0 Hypothetical protein (1)                                     |                                                                                                                                                                                                                                       |                                                                                                                                                                                                                                                                              | scaffold_2_mRNA_2122.1          | -                            | -                               |
| GF0027077 | 1                            | 0                         | 0                            | 0 Cytokinin riboside 5'-monophosphate phosphoribohydrolase (1) |                                                                                                                                                                                                                                       | LOG family [IPRO31100] (1)                                                                                                                                                                                                                                                   | scaffold_2_mRNA_2121.1          | -                            | -                               |
| GF0027076 | 1                            | 0                         | 0                            | 0 Hypothetical protein (1)                                     |                                                                                                                                                                                                                                       |                                                                                                                                                                                                                                                                              | scaffold_2_mRNA_2120.1          | -                            | -                               |
| GF0027075 | 1                            | 0                         | 0                            | 0 Hypothetical protein (1)                                     |                                                                                                                                                                                                                                       |                                                                                                                                                                                                                                                                              | scaffold_2_mRNA_2117.1          | -                            | -                               |
| GF0027074 | 1                            | 0                         | 0                            | 0 Hypothetical protein (1)                                     |                                                                                                                                                                                                                                       | LOG family [IPRO31100] (1)                                                                                                                                                                                                                                                   | scaffold_2_mRNA_2116.1          | -                            | -                               |
| GF0027073 | 1                            | 0                         | 0                            | 0 BED zinc finger/JAT family dimerization domain isoform 1 (1) | DNA binding [GO:0003677 molecular_function] (1); protein dimerization activity [GO:0046983 molecular_function] (1); nucleic acid binding [GO:0003676 molecular_function] (1)                                                          | HAT, C-terminal dimerisation domain [IPRO0896] (1); Zinc finger, BED-type [IPRO03656] (1); HAT-like transposase, RNase-H fold [IPRO25525] (1); Ribonuclease H-like domain [IPRO12337] (1); Zinc finger C2H2-type [IPRO13087] (1)                                             | scaffold_2_mRNA_2114.1          | -                            | -                               |
| GF0027072 | 1                            | 0                         | 0                            | 0 Hypothetical protein (1)                                     |                                                                                                                                                                                                                                       |                                                                                                                                                                                                                                                                              | scaffold_2_mRNA_211.1           | -                            | -                               |
| GF0027071 | 1                            | 0                         | 0                            | 0 Hypothetical protein (1)                                     | nucleic acid binding [GO:0003676 molecular_function] (1)                                                                                                                                                                              | Ribonuclease H-like domain [IPRO12337] (1)                                                                                                                                                                                                                                   | scaffold_2_mRNA_2109.1          | -                            | -                               |
| GF0027070 | 1                            | 0                         | 0                            | 0 Hypothetical protein (1)                                     |                                                                                                                                                                                                                                       |                                                                                                                                                                                                                                                                              | scaffold_2_mRNA_2108.1          | -                            | -                               |
| GF0027069 | 1                            | 0                         | 0                            | 0 Hypothetical protein (1)                                     |                                                                                                                                                                                                                                       |                                                                                                                                                                                                                                                                              | scaffold_2_mRNA_2101.1          | -                            | -                               |
| GF0027068 | 1                            | 0                         | 0                            | 0 Cytokinin riboside 5'-monophosphate phosphoribohydrolase (1) |                                                                                                                                                                                                                                       | LOG family [IPRO31100] (1)                                                                                                                                                                                                                                                   | scaffold_2_mRNA_210.1           | -                            | -                               |
| GF0027067 | 1                            | 0                         | 0                            | 0 Hypothetical protein (1)                                     |                                                                                                                                                                                                                                       |                                                                                                                                                                                                                                                                              | scaffold_2_mRNA_2099.1          | -                            | -                               |
| GF0027066 | 1                            | 0                         | 0                            | 0 Hypothetical protein (1)                                     |                                                                                                                                                                                                                                       |                                                                                                                                                                                                                                                                              | scaffold_2_mRNA_2098.1          | -                            | -                               |
| GF0027065 | 1                            | 0                         | 0                            | 0 Hypothetical protein (1)                                     |                                                                                                                                                                                                                                       |                                                                                                                                                                                                                                                                              | scaffold_2_mRNA_2090.1          | -                            | -                               |
| GF0027064 | 1                            | 0                         | 0                            | 0 Cytokinin riboside 5'-monophosphate phosphoribohydrolase (1) |                                                                                                                                                                                                                                       | Cytokinin riboside 5'-monophosphate phosphoribohydrolase LOG [IPRO05269] (1); LOG family [IPRO31100] (1)                                                                                                                                                                     | scaffold_2_mRNA_2085.1          | -                            | -                               |
| GF0027063 | 1                            | 0                         | 0                            | 0 Hypothetical protein (1)                                     |                                                                                                                                                                                                                                       |                                                                                                                                                                                                                                                                              | scaffold_2_mRNA_2084.1          | -                            | -                               |
| GF0027062 | 1                            | 0                         | 0                            | 0 Hypothetical protein (1)                                     |                                                                                                                                                                                                                                       |                                                                                                                                                                                                                                                                              | scaffold_2_mRNA_2072.1          | -                            | -                               |
| GF0027061 | 1                            | 0                         | 0                            | 0 Cytokinin riboside 5'-monophosphate phosphoribohydrolase (1) |                                                                                                                                                                                                                                       | LOG family [IPRO31100] (1)                                                                                                                                                                                                                                                   | scaffold_2_mRNA_2071.1          | -                            | -                               |
| GF0027060 | 1                            | 0                         | 0                            | 0 Hypothetical protein (1)                                     |                                                                                                                                                                                                                                       |                                                                                                                                                                                                                                                                              | scaffold_2_mRNA_2070.1          | -                            | -                               |
| GF0027059 | 1                            | 0                         | 0                            | 0 60S ribosomal protein L14 (1)                                | ribosome [GO:0005840 cellular_component] (1); translation [GO:0006412 biological_process] (1); intracellular [GO:0005622 cellular_component] (1); structural constituent of ribosome [GO:0003735 molecular_function] (1)              | Ribosomal protein L2 domain 2 [IPRO14722] (1); Ribosomal protein L14e domain [IPRO02784] (1); Translation protein SH3-like domain [IPRO0899] (1)                                                                                                                             | scaffold_2_mRNA_2066.1          | -                            | -                               |
| GF0027058 | 1                            | 0                         | 0                            | 0 Hypothetical protein (1)                                     |                                                                                                                                                                                                                                       |                                                                                                                                                                                                                                                                              | scaffold_2_mRNA_2061.1          | -                            | -                               |
| GF0027057 | 1                            | 0                         | 0                            | 0 Ubiquitin-conjugating enzyme E2 (1)                          |                                                                                                                                                                                                                                       | Ubiquitin-conjugating enzyme RWD-like [IPRO16155] (1); Ubiquitin-conjugating enzyme, active site [IPRO23313] (1); Ubiquitin-conjugating enzyme E2 [IPRO06088] (1)                                                                                                            | scaffold_2_mRNA_2060.1          | -                            | -                               |
| GF0027056 | 1                            | 0                         | 0                            | 0 Cytokinin riboside 5'-monophosphate phosphoribohydrolase (1) |                                                                                                                                                                                                                                       | LOG family [IPRO31100] (1); Cytokinin riboside 5'-monophosphate phosphoribohydrolase LOG [IPRO05269] (1)                                                                                                                                                                     | scaffold_2_mRNA_206.1           | -                            | -                               |
| GF0027055 | 1                            | 0                         | 0                            | 0 Hypothetical protein (1)                                     |                                                                                                                                                                                                                                       |                                                                                                                                                                                                                                                                              | scaffold_2_mRNA_2054.1          | -                            | -                               |
| GF0027054 | 1                            | 0                         | 0                            | 0 Hypothetical protein (1)                                     |                                                                                                                                                                                                                                       |                                                                                                                                                                                                                                                                              | scaffold_2_mRNA_2052.1          | -                            | -                               |
| GF0027053 | 1                            | 0                         | 0                            | 0 Cytokinin riboside 5'-monophosphate phosphoribohydrolase (1) |                                                                                                                                                                                                                                       |                                                                                                                                                                                                                                                                              | scaffold_2_mRNA_2050.1          | -                            | -                               |
| GF0027052 | 1                            | 0                         | 0                            | 0 Hypothetical protein (1)                                     |                                                                                                                                                                                                                                       |                                                                                                                                                                                                                                                                              | scaffold_2_mRNA_205.1           | -                            | -                               |
| GF0027051 | 1                            | 0                         | 0                            | 0 Hypothetical protein (1)                                     |                                                                                                                                                                                                                                       |                                                                                                                                                                                                                                                                              | scaffold_2_mRNA_2049.1          | -                            | -                               |
| GF0027050 | 1                            | 0                         | 0                            | 0 Hypothetical protein (1)                                     |                                                                                                                                                                                                                                       |                                                                                                                                                                                                                                                                              | scaffold_2_mRNA_2045.1          | -                            | -                               |
| GF0027049 | 1                            | 0                         | 0                            | 0 Hypothetical protein (1)                                     |                                                                                                                                                                                                                                       |                                                                                                                                                                                                                                                                              | scaffold_2_mRNA_2044.1          | -                            | -                               |
| GF0027048 | 1                            | 0                         | 0                            | 0 Hypothetical protein (1)                                     |                                                                                                                                                                                                                                       |                                                                                                                                                                                                                                                                              | scaffold_2_mRNA_2043.1          | -                            | -                               |
| GF0027047 | 1                            | 0                         | 0                            | 0 Hypothetical protein (1)                                     |                                                                                                                                                                                                                                       |                                                                                                                                                                                                                                                                              | scaffold_2_mRNA_2042.1          | -                            | -                               |
| GF0027046 | 1                            | 0                         | 0                            | 0 Hypothetical protein (1)                                     |                                                                                                                                                                                                                                       | Viral movement protein [IPRO28919] (1)                                                                                                                                                                                                                                       | scaffold_2_mRNA_204.1           | -                            | -                               |
| GF0027045 | 1                            | 0                         | 0                            | 0 Hypothetical protein (1)                                     |                                                                                                                                                                                                                                       | Aspartic peptidase domain [IPRO21109] (1); Paramyxovirus antigen Ma [IPRO26523] (1); Reverse transcriptase domain [IPRO00477] (1)                                                                                                                                            | scaffold_2_mRNA_2036.1          | -                            | -                               |
| GF0027044 | 1                            | 0                         | 0                            | 0 Hypothetical protein (1)                                     |                                                                                                                                                                                                                                       |                                                                                                                                                                                                                                                                              | scaffold_2_mRNA_2035.1          | -                            | -                               |
| GF0027043 | 1                            | 0                         | 0                            | 0 Hypothetical protein (1)                                     |                                                                                                                                                                                                                                       |                                                                                                                                                                                                                                                                              | scaffold_2_mRNA_2033.1          | -                            | -                               |
| GF0027042 | 1                            | 0                         | 0                            | 0 Hypothetical protein (1)                                     |                                                                                                                                                                                                                                       |                                                                                                                                                                                                                                                                              | scaffold_2_mRNA_2030.1          | -                            | -                               |
| GF0027041 | 1                            | 0                         | 0                            | 0 Hypothetical protein (1)                                     |                                                                                                                                                                                                                                       |                                                                                                                                                                                                                                                                              | scaffold_2_mRNA_203.1           | -                            | -                               |
| GF0027040 | 1                            | 0                         | 0                            | 0 Hypothetical protein (1)                                     |                                                                                                                                                                                                                                       | LOG family [IPRO31100] (1)                                                                                                                                                                                                                                                   | scaffold_2_mRNA_2027.1          | -                            | -                               |
| GF0027039 | 1                            | 0                         | 0                            | 0 Hypothetical protein (1)                                     |                                                                                                                                                                                                                                       |                                                                                                                                                                                                                                                                              | scaffold_2_mRNA_2025.1          | -                            | -                               |
| GF0027038 | 1                            | 0                         | 0                            | 0 Cytokinin riboside 5'-monophosphate phosphoribohydrolase (1) |                                                                                                                                                                                                                                       |                                                                                                                                                                                                                                                                              | scaffold_2_mRNA_202.1           | -                            | -                               |
| GF0027037 | 1                            | 0                         | 0                            | 0 Sesquiterpene synthase (1)                                   | metabolic process [GO:0008152 biological_process] (1); magnesium ion binding [GO:0000287 molecular_function] (1); lyase activity [GO:0016829 molecular_function] (1); terpenase synthase activity [GO:0010333 molecular_function] (1) | Terpenoid cyclase/protein prenyltransferase alpha-alpha teroid [IPRO08930] (1); Terpene synthase, metal-binding domain [IPRO05630] (1); Terpene synthase, N-terminal domain [IPRO01906] (1); Isoprenoid synthase domain [IPRO08949] (1)                                      | scaffold_2_mRNA_2015.1          | -                            | -                               |
| GF0027036 | 1                            | 0                         | 0                            | 0 Hypothetical protein (1)                                     |                                                                                                                                                                                                                                       |                                                                                                                                                                                                                                                                              | scaffold_2_mRNA_2013.1          | -                            | -                               |
| GF0027035 | 1                            | 0                         | 0                            | 0 Hypothetical protein (1)                                     |                                                                                                                                                                                                                                       |                                                                                                                                                                                                                                                                              | scaffold_2_mRNA_201.1           | -                            | -                               |
| GF0027034 | 1                            | 0                         | 0                            | 0 Hypothetical protein (1)                                     |                                                                                                                                                                                                                                       | Retrotransposon gag domain [IPRO05162] (1)                                                                                                                                                                                                                                   | scaffold_2_mRNA_2007.1          | -                            | -                               |
| GF0027033 | 1                            | 0                         | 0                            | 0 Hypothetical protein (1)                                     |                                                                                                                                                                                                                                       | Arabidopsis retrotransposon Orf1 [IPRO04312] (1)                                                                                                                                                                                                                             | scaffold_2_mRNA_2002.1          | -                            | -                               |
| GF0027032 | 1                            | 0                         | 0                            | 0 Putative Aihla retroelement ORF1 protein (1)                 |                                                                                                                                                                                                                                       | Retrotransposon gag domain [IPRO05162] (1)                                                                                                                                                                                                                                   | scaffold_2_mRNA_2000.1          | -                            | -                               |
| GF0027031 | 1                            | 0                         | 0                            | 0 Hypothetical protein (1)                                     |                                                                                                                                                                                                                                       |                                                                                                                                                                                                                                                                              | scaffold_2_mRNA_1997.1          | -                            | -                               |
| GF0027030 | 1                            | 0                         | 0                            | 0 Hypothetical protein (1)                                     |                                                                                                                                                                                                                                       |                                                                                                                                                                                                                                                                              | scaffold_2_mRNA_1996.1          | -                            | -                               |
| GF0027029 | 1                            | 0                         | 0                            | 0 Hypothetical protein (1)                                     |                                                                                                                                                                                                                                       |                                                                                                                                                                                                                                                                              | scaffold_2_mRNA_1995.1          | -                            | -                               |
| GF0027028 | 1                            | 0                         | 0                            | 0 Protein FARI-RELATED SEQUENCE 6 (1)                          | zinc ion binding [GO:0008270 molecular_function] (1); regulation of transcription, DNA-templated [GO:0006355 biological_process] (1)                                                                                                  | FARI DNA binding domain [IPRO04330] (1); FHY3/FAR1 family [IPRO31052] (1); Zinc finger, SWIM-type [IPRO07527] (1); Zinc finger, FMZ-type [IPRO06564] (1); MULE transposase domain [IPRO18289] (1)                                                                            | scaffold_2_mRNA_1994.1          | -                            | -                               |
| GF0027027 | 1                            | 0                         | 0                            | 0 Hypothetical protein (1)                                     |                                                                                                                                                                                                                                       |                                                                                                                                                                                                                                                                              | scaffold_2_mRNA_1984.1          | -                            | -                               |
| GF0027026 | 1                            | 0                         | 0                            | 0 Hypothetical protein (1)                                     |                                                                                                                                                                                                                                       | Retrotransposon gag domain [IPRO05162] (1)                                                                                                                                                                                                                                   | scaffold_2_mRNA_1983.1          | -                            | -                               |
| GF0027025 | 1                            | 0                         | 0                            | 0 RNA-directed DNA polymerase (Reverse transcriptase) (1)      |                                                                                                                                                                                                                                       | Reverse transcriptase domain [IPRO00477] (1)                                                                                                                                                                                                                                 | scaffold_2_mRNA_1980.1          | -                            | -                               |
| GF0027024 | 1                            | 0                         | 0                            | 0 Ribonuclease H-like superfamily protein (1)                  |                                                                                                                                                                                                                                       | Reverse transcriptase zinc-binding domain [IPRO26960] (1)                                                                                                                                                                                                                    | scaffold_2_mRNA_1979.1          | -                            | -                               |
| GF0027023 | 1                            | 0                         | 0                            | 0 Hypothetical protein (1)                                     |                                                                                                                                                                                                                                       |                                                                                                                                                                                                                                                                              | scaffold_2_mRNA_1971.1          | -                            | -                               |
| GF0027022 | 1                            | 0                         | 0                            | 0 Hypothetical protein (1)                                     | nucleic acid binding [GO:0003676 molecular_function] (1); zinc ion binding [GO:0008270 molecular_function] (1)                                                                                                                        | Zinc finger, CCHC-type [IPRO01878] (1)                                                                                                                                                                                                                                       | scaffold_2_mRNA_196.1           | -                            | -                               |



| ID        | Num. in <i>C. clementiae</i> | Num. in <i>C. uchiha</i> | Num. in <i>P. trifoliata</i> | Note                                                           | GO                                                                                                                                                                                                                                  | InterPro                                                                                                                                                                                                                                                                    | Members in <i>C. clementiae</i> | Members in <i>C. uchiha</i> | Members in <i>P. trifoliata</i> |
|-----------|------------------------------|--------------------------|------------------------------|----------------------------------------------------------------|-------------------------------------------------------------------------------------------------------------------------------------------------------------------------------------------------------------------------------------|-----------------------------------------------------------------------------------------------------------------------------------------------------------------------------------------------------------------------------------------------------------------------------|---------------------------------|-----------------------------|---------------------------------|
| GF0027021 | 1                            | 0                        | 0                            | 0 Hypothetical protein (1)                                     |                                                                                                                                                                                                                                     | Retrotransposon gag domain [IPR005142] (1)                                                                                                                                                                                                                                  | scaffold_2_mRNA_1958.1          | -                           | -                               |
| GF0027020 | 1                            | 0                        | 0                            | 0 Tyrosine/nicotinamine family aminotransferase (1)            | biological process [GO:0009058] (1); catalytic activity [GO:0003284 molecular_function] (1); pyridoxal phosphate binding [GO:0030170 molecular_function] (1)                                                                        | Pyridoxal phosphate-dependent transferase, major region, subdomain 1 [IPR015421] (1); Pyridoxal phosphate-dependent transferase, subdomain 2 [IPR015422] (1); Aminotransferase, class I/class II [IPR004839] (1); Pyridoxal phosphate-dependent transferase [IPR015424] (1) | scaffold_2_mRNA_1957.1          | -                           | -                               |
| GF0027019 | 1                            | 0                        | 0                            | 0 Hypothetical protein (1)                                     | mRNA splicing, via spliceosome [GO:0000398 biological_process] (1); RNA binding [GO:0003723 molecular_function] (1); metal ion binding [GO:0046872 molecular_function] (1); U2AF [GO:0089701 cellular_component] (1)                | Zinc finger, CCCH-type [IPR000571] (1); U2 auxiliary factor small subunit [IPR009145] (1)                                                                                                                                                                                   | scaffold_2_mRNA_1951.1          | -                           | -                               |
| GF0027018 | 1                            | 0                        | 0                            | 0 Hypothetical protein (1)                                     |                                                                                                                                                                                                                                     |                                                                                                                                                                                                                                                                             | scaffold_2_mRNA_1950.1          | -                           | -                               |
| GF0027017 | 1                            | 0                        | 0                            | 0 Hypothetical protein (1)                                     |                                                                                                                                                                                                                                     |                                                                                                                                                                                                                                                                             | scaffold_2_mRNA_1951.1          | -                           | -                               |
| GF0027016 | 1                            | 0                        | 0                            | 0 Hypothetical protein (1)                                     | RNA binding [GO:0003723 molecular_function] (1); mRNA splicing, via spliceosome [GO:0000398 biological_process] (1); metal ion binding [GO:0046872 molecular_function] (1); U2AF [GO:0089701 cellular_component] (1)                | U2 auxiliary factor small subunit [IPR009145] (1); Zinc finger, CCCH-type [IPR000571] (1)                                                                                                                                                                                   | scaffold_2_mRNA_1949.1          | -                           | -                               |
| GF0027015 | 1                            | 0                        | 0                            | 0 Hypothetical protein (1)                                     |                                                                                                                                                                                                                                     |                                                                                                                                                                                                                                                                             | scaffold_2_mRNA_1935.1          | -                           | -                               |
| GF0027014 | 1                            | 0                        | 0                            | 0 Hypothetical protein (1)                                     |                                                                                                                                                                                                                                     |                                                                                                                                                                                                                                                                             | scaffold_2_mRNA_1932.1          | -                           | -                               |
| GF0027013 | 1                            | 0                        | 0                            | 0 Hypothetical protein (1)                                     |                                                                                                                                                                                                                                     |                                                                                                                                                                                                                                                                             | scaffold_2_mRNA_1931.1          | -                           | -                               |
| GF0027012 | 1                            | 0                        | 0                            | 0 Hypothetical protein (1)                                     |                                                                                                                                                                                                                                     |                                                                                                                                                                                                                                                                             | scaffold_2_mRNA_1931.1          | -                           | -                               |
| GF0027011 | 1                            | 0                        | 0                            | 0 Hypothetical protein (1)                                     |                                                                                                                                                                                                                                     |                                                                                                                                                                                                                                                                             | scaffold_2_mRNA_1929.1          | -                           | -                               |
| GF0027010 | 1                            | 0                        | 0                            | 0 Hypothetical protein (1)                                     |                                                                                                                                                                                                                                     |                                                                                                                                                                                                                                                                             | scaffold_2_mRNA_1928.1          | -                           | -                               |
| GF0027009 | 1                            | 0                        | 0                            | 0 Cytokinin riboside 5'-monophosphate phosphoribohydrolase (1) |                                                                                                                                                                                                                                     | LOG family [IPR031100] (1)                                                                                                                                                                                                                                                  | scaffold_2_mRNA_1927.1          | -                           | -                               |
| GF0027008 | 1                            | 0                        | 0                            | 0 Hypothetical protein (1)                                     |                                                                                                                                                                                                                                     |                                                                                                                                                                                                                                                                             | scaffold_2_mRNA_1923.1          | -                           | -                               |
| GF0027007 | 1                            | 0                        | 0                            | 0 Hypothetical protein (1)                                     |                                                                                                                                                                                                                                     |                                                                                                                                                                                                                                                                             | scaffold_2_mRNA_1922.1          | -                           | -                               |
| GF0027006 | 1                            | 0                        | 0                            | 0 Hypothetical protein (1)                                     |                                                                                                                                                                                                                                     |                                                                                                                                                                                                                                                                             | scaffold_2_mRNA_1920.1          | -                           | -                               |
| GF0027005 | 1                            | 0                        | 0                            | 0 Hypothetical protein (1)                                     |                                                                                                                                                                                                                                     |                                                                                                                                                                                                                                                                             | scaffold_2_mRNA_1921.1          | -                           | -                               |
| GF0027004 | 1                            | 0                        | 0                            | 0 Hypothetical protein (1)                                     |                                                                                                                                                                                                                                     |                                                                                                                                                                                                                                                                             | scaffold_2_mRNA_1914.1          | -                           | -                               |
| GF0027003 | 1                            | 0                        | 0                            | 0 Hypothetical protein (1)                                     |                                                                                                                                                                                                                                     |                                                                                                                                                                                                                                                                             | scaffold_2_mRNA_1911.1          | -                           | -                               |
| GF0027002 | 1                            | 0                        | 0                            | 0 CAH-1 autoinducer sensor                                     | transphosphatase cysteine isoform 3 (1)                                                                                                                                                                                             | Harbinger transposase-derived nuclease domain [IPR027806] (1)                                                                                                                                                                                                               | scaffold_2_mRNA_1909.1          | -                           | -                               |
| GF0027001 | 1                            | 0                        | 0                            | 0 Cytokinin riboside 5'-monophosphate phosphoribohydrolase (1) |                                                                                                                                                                                                                                     |                                                                                                                                                                                                                                                                             | scaffold_2_mRNA_190.1           | -                           | -                               |
| GF0027000 | 1                            | 0                        | 0                            | 0 Hypothetical protein (1)                                     | metabolic process [GO:0008152 biological_process] (1); magnesium ion binding [GO:0000387 molecular_function] (1); terpene synthase activity [GO:0010333 molecular_function] (1); lyase activity [GO:0016829 molecular_function] (1) | Terpene synthase, metal-binding domain [IPR005630] (1); Terpene synthase, N-terminal domain [IPR019066] (1); Terpenoid cyclases/protein prenyltransferase alpha-alpha toroid [IPR009390] (1); isoprenoid synthase domain [IPR008949] (1)                                    | scaffold_2_mRNA_1898.1          | -                           | -                               |
| GF0026999 | 1                            | 0                        | 0                            | 0 Cytokinin riboside 5'-monophosphate phosphoribohydrolase (1) |                                                                                                                                                                                                                                     | LOG family [IPR031100] (1)                                                                                                                                                                                                                                                  | scaffold_2_mRNA_1891.1          | -                           | -                               |
| GF0026998 | 1                            | 0                        | 0                            | 0 Hypothetical protein (1)                                     |                                                                                                                                                                                                                                     |                                                                                                                                                                                                                                                                             | scaffold_2_mRNA_1890.1          | -                           | -                               |
| GF0026997 | 1                            | 0                        | 0                            | 0 Hypothetical protein (1)                                     |                                                                                                                                                                                                                                     |                                                                                                                                                                                                                                                                             | scaffold_2_mRNA_1891.1          | -                           | -                               |
| GF0026996 | 1                            | 0                        | 0                            | 0 Hypothetical protein (1)                                     |                                                                                                                                                                                                                                     |                                                                                                                                                                                                                                                                             | scaffold_2_mRNA_1884.1          | -                           | -                               |
| GF0026995 | 1                            | 0                        | 0                            | 0 Zinc knuckle family protein (1)                              | zinc ion binding [GO:0008270 molecular_function] (1); nucleic acid binding [GO:0003676 molecular_function] (1)                                                                                                                      | Zinc finger, CCHC-type [IPR001878] (1); Domain of unknown function DUF4219 [IPR025314] (1)                                                                                                                                                                                  | scaffold_2_mRNA_1883.1          | -                           | -                               |
| GF0026994 | 1                            | 0                        | 0                            | 0 Cytokinin riboside 5'-monophosphate phosphoribohydrolase (1) |                                                                                                                                                                                                                                     | LOG family [IPR031100] (1)                                                                                                                                                                                                                                                  | scaffold_2_mRNA_1881.1          | -                           | -                               |
| GF0026993 | 1                            | 0                        | 0                            | 0 Hypothetical protein (1)                                     |                                                                                                                                                                                                                                     |                                                                                                                                                                                                                                                                             | scaffold_2_mRNA_1880.1          | -                           | -                               |
| GF0026992 | 1                            | 0                        | 0                            | 0 Hypothetical protein (1)                                     |                                                                                                                                                                                                                                     |                                                                                                                                                                                                                                                                             | scaffold_2_mRNA_1881.1          | -                           | -                               |
| GF0026991 | 1                            | 0                        | 0                            | 0 Hypothetical protein (1)                                     |                                                                                                                                                                                                                                     |                                                                                                                                                                                                                                                                             | scaffold_2_mRNA_1879.1          | -                           | -                               |
| GF0026990 | 1                            | 0                        | 0                            | 0 Hypothetical protein (1)                                     |                                                                                                                                                                                                                                     |                                                                                                                                                                                                                                                                             | scaffold_2_mRNA_1878.1          | -                           | -                               |
| GF0026989 | 1                            | 0                        | 0                            | 0 Hypothetical protein (1)                                     |                                                                                                                                                                                                                                     |                                                                                                                                                                                                                                                                             | scaffold_2_mRNA_1875.1          | -                           | -                               |
| GF0026988 | 1                            | 0                        | 0                            | 0 Hypothetical protein (1)                                     |                                                                                                                                                                                                                                     |                                                                                                                                                                                                                                                                             | scaffold_2_mRNA_1874.1          | -                           | -                               |
| GF0026987 | 1                            | 0                        | 0                            | 0 Hypothetical protein (1)                                     | regulation of transcription, DNA-templated [GO:0006355 biological_process] (1); nucleic acid binding [GO:0003676 molecular_function] (1)                                                                                            | Carlavirus nucleic acid-binding protein [IPR002568] (1)                                                                                                                                                                                                                     | scaffold_2_mRNA_1872.1          | -                           | -                               |
| GF0026986 | 1                            | 0                        | 0                            | 0 Hypothetical protein (1)                                     |                                                                                                                                                                                                                                     |                                                                                                                                                                                                                                                                             | scaffold_2_mRNA_1871.1          | -                           | -                               |
| GF0026985 | 1                            | 0                        | 0                            | 0 Hypothetical protein (1)                                     |                                                                                                                                                                                                                                     |                                                                                                                                                                                                                                                                             | scaffold_2_mRNA_1869.1          | -                           | -                               |
| GF0026984 | 1                            | 0                        | 0                            | 0 Hypothetical protein (1)                                     |                                                                                                                                                                                                                                     |                                                                                                                                                                                                                                                                             | scaffold_2_mRNA_1868.1          | -                           | -                               |
| GF0026983 | 1                            | 0                        | 0                            | 0 Hypothetical protein (1)                                     |                                                                                                                                                                                                                                     |                                                                                                                                                                                                                                                                             | scaffold_2_mRNA_1867.1          | -                           | -                               |
| GF0026982 | 1                            | 0                        | 0                            | 0 Cytokinin riboside 5'-monophosphate phosphoribohydrolase (1) |                                                                                                                                                                                                                                     | LOG family [IPR031100] (1)                                                                                                                                                                                                                                                  | scaffold_2_mRNA_1866.1          | -                           | -                               |
| GF0026981 | 1                            | 0                        | 0                            | 0 Hypothetical protein (1)                                     |                                                                                                                                                                                                                                     |                                                                                                                                                                                                                                                                             | scaffold_2_mRNA_1863.1          | -                           | -                               |
| GF0026980 | 1                            | 0                        | 0                            | 0 Cytokinin riboside 5'-monophosphate phosphoribohydrolase (1) |                                                                                                                                                                                                                                     |                                                                                                                                                                                                                                                                             | scaffold_2_mRNA_1862.1          | -                           | -                               |
| GF0026979 | 1                            | 0                        | 0                            | 0 Hypothetical protein (1)                                     |                                                                                                                                                                                                                                     |                                                                                                                                                                                                                                                                             | scaffold_2_mRNA_1861.1          | -                           | -                               |
| GF0026978 | 1                            | 0                        | 0                            | 0 Hypothetical protein (1)                                     |                                                                                                                                                                                                                                     |                                                                                                                                                                                                                                                                             | scaffold_2_mRNA_1858.1          | -                           | -                               |
| GF0026977 | 1                            | 0                        | 0                            | 0 Hypothetical protein (1)                                     |                                                                                                                                                                                                                                     | Retrotransposon gag domain [IPR005162] (1)                                                                                                                                                                                                                                  | scaffold_2_mRNA_1857.1          | -                           | -                               |
| GF0026976 | 1                            | 0                        | 0                            | 0 Cytokinin riboside 5'-monophosphate phosphoribohydrolase (1) |                                                                                                                                                                                                                                     | LOG family [IPR031100] (1); Cytokinin riboside 5'-monophosphate phosphoribohydrolase LOG [IPR005269] (1)                                                                                                                                                                    | scaffold_2_mRNA_1842.1          | -                           | -                               |
| GF0026975 | 1                            | 0                        | 0                            | 0 BED zinc finger/JAT family dimerization domain (1)           | protein dimerization activity [GO:0046083 molecular_function] (1); nucleic acid binding [GO:0003676 molecular_function] (1); DNA binding [GO:0003677 molecular_function] (1)                                                        | HAT, C-terminal dimerisation domain [IPR008996] (1); Ribonuclease H-like domain [IPR012337] (1); HAT-like transposase, RNase-H fold [IPR025525] (1)                                                                                                                         | scaffold_2_mRNA_1839.1          | -                           | -                               |
| GF0026974 | 1                            | 0                        | 0                            | 0 Hypothetical protein (1)                                     |                                                                                                                                                                                                                                     |                                                                                                                                                                                                                                                                             | scaffold_2_mRNA_1831.1          | -                           | -                               |
| GF0026973 | 1                            | 0                        | 0                            | 0 RNA-directed DNA polymerase reverse transcriptase (1)        |                                                                                                                                                                                                                                     | Reverse transcriptase domain [IPR000477] (1)                                                                                                                                                                                                                                | scaffold_2_mRNA_1826.1          | -                           | -                               |
| GF0026972 | 1                            | 0                        | 0                            | 0 Hypothetical protein (1)                                     | zinc ion binding [GO:0008270 molecular_function] (1); nucleic acid binding [GO:0003676 molecular_function] (1)                                                                                                                      | Zinc finger, CCHC-type [IPR001878] (1); Zinc knuckle CX2CX4HX4C [IPR025836] (1)                                                                                                                                                                                             | scaffold_2_mRNA_1825.1          | -                           | -                               |
| GF0026971 | 1                            | 0                        | 0                            | 0 Hypothetical protein (1)                                     |                                                                                                                                                                                                                                     | LOG family [IPR031100] (1)                                                                                                                                                                                                                                                  | scaffold_2_mRNA_1821.1          | -                           | -                               |
| GF0026970 | 1                            | 0                        | 0                            | 0 Hypothetical protein (1)                                     |                                                                                                                                                                                                                                     |                                                                                                                                                                                                                                                                             | scaffold_2_mRNA_1818.1          | -                           | -                               |
| GF0026969 | 1                            | 0                        | 0                            | 0 Hypothetical protein (1)                                     |                                                                                                                                                                                                                                     |                                                                                                                                                                                                                                                                             | scaffold_2_mRNA_1816.1          | -                           | -                               |
| GF0026968 | 1                            | 0                        | 0                            | 0 Similarity to non-LTR retroelement reverse transcriptase (1) |                                                                                                                                                                                                                                     |                                                                                                                                                                                                                                                                             | scaffold_2_mRNA_1811.1          | -                           | -                               |
| GF0026967 | 1                            | 0                        | 0                            | 0 Hypothetical protein (1)                                     |                                                                                                                                                                                                                                     | Domain of unknown function DUF4283 [IPR025558] (1)                                                                                                                                                                                                                          | scaffold_2_mRNA_1809.1          | -                           | -                               |
| GF0026966 | 1                            | 0                        | 0                            | 0 Hypothetical protein (1)                                     |                                                                                                                                                                                                                                     | Domain of unknown function DUF4219 [IPR025314] (1)                                                                                                                                                                                                                          | scaffold_2_mRNA_1801.1          | -                           | -                               |
| GF0026965 | 1                            | 0                        | 0                            | 0 Hypothetical protein (1)                                     | nucleic acid binding [GO:0003676 molecular_function] (1)                                                                                                                                                                            | Ribonuclease H-like domain [IPR012337] (1); Domain of unknown function DUF4283 [IPR025558] (1); Reverse transcriptase zinc-binding domain [IPR026960] (1); Zinc knuckle CX2CX4HX4C [IPR025836] (1); Endonuclease/exonuclease/phosphatase [IPR005135] (1)                    | scaffold_2_mRNA_181.1           | -                           | -                               |
| GF0026964 | 1                            | 0                        | 0                            | 0 Hypothetical protein (1)                                     |                                                                                                                                                                                                                                     |                                                                                                                                                                                                                                                                             | scaffold_2_mRNA_1798.1          | -                           | -                               |
| GF0026963 | 1                            | 0                        | 0                            | 0 Hypothetical protein (1)                                     | nucleic acid binding [GO:0003676 molecular_function] (1)                                                                                                                                                                            | Ribonuclease H-like domain [IPR012337] (1)                                                                                                                                                                                                                                  | scaffold_2_mRNA_1796.1          | -                           | -                               |
| GF0026962 | 1                            | 0                        | 0                            | 0 Hypothetical protein (1)                                     |                                                                                                                                                                                                                                     |                                                                                                                                                                                                                                                                             | scaffold_2_mRNA_1793.1          | -                           | -                               |
| GF0026961 | 1                            | 0                        | 0                            | 0 Hypothetical protein (1)                                     |                                                                                                                                                                                                                                     | Endonuclease/exonuclease/phosphatase [IPR005135] (1)                                                                                                                                                                                                                        | scaffold_2_mRNA_1789.1          | -                           | -                               |
| GF0026960 | 1                            | 0                        | 0                            | 0 Hypothetical protein (1)                                     |                                                                                                                                                                                                                                     |                                                                                                                                                                                                                                                                             | scaffold_2_mRNA_1788.1          | -                           | -                               |
| GF0026959 | 1                            | 0                        | 0                            | 0 Hypothetical protein (1)                                     |                                                                                                                                                                                                                                     |                                                                                                                                                                                                                                                                             | scaffold_2_mRNA_1780.1          | -                           | -                               |
| GF0026958 | 1                            | 0                        | 0                            | 0 MuDR family transposase containing protein (1)               |                                                                                                                                                                                                                                     | MULE transposase domain [IPR018289] (1)                                                                                                                                                                                                                                     | scaffold_2_mRNA_1777.1          | -                           | -                               |
| GF0026957 | 1                            | 0                        | 0                            | 0 Disease resistance family protein / LRR family protein (1)   | protein binding [GO:0005515 molecular_function] (1)                                                                                                                                                                                 | Leucine-rich repeat [IPR001611] (1); Leucine-rich repeat-containing N-terminal, plant-type [IPR013210] (1); Leucine-rich repeat domain, L domain-like [IPR032675] (1)                                                                                                       | scaffold_2_mRNA_1752.1          | -                           | -                               |
| GF0026956 | 1                            | 0                        | 0                            | 0 Hypothetical protein (1)                                     |                                                                                                                                                                                                                                     |                                                                                                                                                                                                                                                                             | scaffold_2_mRNA_1751.1          | -                           | -                               |
| GF0026955 | 1                            | 0                        | 0                            | 0 Hypothetical protein (1)                                     | nucleic acid binding [GO:0003676 molecular_function] (1); DNA integration [GO:0015074 biological_process] (1)                                                                                                                       | Ribonuclease H-like domain [IPR012337] (1); Reverse transcriptase, RNA-dependent DNA polymerase [IPR013103] (1); Integrase, catalytic core [IPR001584] (1)                                                                                                                  | scaffold_2_mRNA_1751.1          | -                           | -                               |

| ID        | Num. in <i>C. clementiae</i> | Num. in <i>C. uchiha</i> | Num. in <i>P. trifoliata</i> | Note                                                                       | GO                                                                                                                                                                                      | InterPro                                                                                                                                                                                                                                                                                       | Members in <i>C. clementiae</i> | Members in <i>C. uchiha</i> | Members in <i>P. trifoliata</i> |
|-----------|------------------------------|--------------------------|------------------------------|----------------------------------------------------------------------------|-----------------------------------------------------------------------------------------------------------------------------------------------------------------------------------------|------------------------------------------------------------------------------------------------------------------------------------------------------------------------------------------------------------------------------------------------------------------------------------------------|---------------------------------|-----------------------------|---------------------------------|
| GF0026954 | 1                            | 0                        | 0                            | 0 Hypothetical protein (1)                                                 | nucleic acid binding [GO:0003676 molecular_function] (1); zinc ion binding [GO:0008270 molecular_function] (1)                                                                          | Zinc finger, CCHC-type [IPRO01878] (1)                                                                                                                                                                                                                                                         | scaffold_2_mRNA_1746.1          | -                           | -                               |
| GF0026953 | 1                            | 0                        | 0                            | 0 Hypothetical protein (1)                                                 |                                                                                                                                                                                         | Retrosposon gag domain [IPRO05162] (1)                                                                                                                                                                                                                                                         | scaffold_2_mRNA_1741.1          | -                           | -                               |
| GF0026952 | 1                            | 0                        | 0                            | 0 Hypothetical protein (1)                                                 |                                                                                                                                                                                         |                                                                                                                                                                                                                                                                                                | scaffold_2_mRNA_1735.1          | -                           | -                               |
| GF0026951 | 1                            | 0                        | 0                            | 0 Hypothetical protein (1)                                                 |                                                                                                                                                                                         |                                                                                                                                                                                                                                                                                                | scaffold_2_mRNA_1734.1          | -                           | -                               |
| GF0026950 | 1                            | 0                        | 0                            | 0 Hypothetical protein (1)                                                 |                                                                                                                                                                                         |                                                                                                                                                                                                                                                                                                | scaffold_2_mRNA_1728.1          | -                           | -                               |
| GF0026949 | 1                            | 0                        | 0                            | 0 Hypothetical protein (1)                                                 |                                                                                                                                                                                         |                                                                                                                                                                                                                                                                                                | scaffold_2_mRNA_1727.1          | -                           | -                               |
| GF0026948 | 1                            | 0                        | 0                            | 0 Hypothetical protein (1)                                                 |                                                                                                                                                                                         |                                                                                                                                                                                                                                                                                                | scaffold_2_mRNA_1721.1          | -                           | -                               |
| GF0026947 | 1                            | 0                        | 0                            | 0 Hypothetical protein (1)                                                 |                                                                                                                                                                                         |                                                                                                                                                                                                                                                                                                | scaffold_2_mRNA_1720.1          | -                           | -                               |
| GF0026946 | 1                            | 0                        | 0                            | 0 Hypothetical protein (1)                                                 |                                                                                                                                                                                         |                                                                                                                                                                                                                                                                                                | scaffold_2_mRNA_1718.1          | -                           | -                               |
| GF0026945 | 1                            | 0                        | 0                            | 0 Hypothetical protein (1)                                                 | nucleic acid binding [GO:0003676 molecular_function] (1); zinc ion binding [GO:0008270 molecular_function] (1)                                                                          | Zinc finger, CCHC-type [IPRO01878] (1)                                                                                                                                                                                                                                                         | scaffold_2_mRNA_1711.1          | -                           | -                               |
| GF0026944 | 1                            | 0                        | 0                            | 0 Hypothetical protein (1)                                                 | nucleic acid binding [GO:0003676 molecular_function] (1); zinc ion binding [GO:0008270 molecular_function] (1)                                                                          | Zinc finger, CCHC-type [IPRO01878] (1); Domain of unknown function DUF4219 [IPRO25314] (1)                                                                                                                                                                                                     | scaffold_2_mRNA_1701.1          | -                           | -                               |
| GF0026943 | 1                            | 0                        | 0                            | 0 Cytokinin riboside 5'-monophosphate phosphoribohydrolase (1)             |                                                                                                                                                                                         | Cytokinin riboside 5'-monophosphate phosphoribohydrolase LOG [IPRO05269] (1); LOG family [IPRO31100] (1)                                                                                                                                                                                       | scaffold_2_mRNA_170.1           | -                           | -                               |
| GF0026942 | 1                            | 0                        | 0                            | 0 Hypothetical protein (1)                                                 |                                                                                                                                                                                         | Protein of unknown function DUF3339 [IPRO21775] (1)                                                                                                                                                                                                                                            | scaffold_2_mRNA_1691.1          | -                           | -                               |
| GF0026941 | 1                            | 0                        | 0                            | 0 Hypothetical protein (1)                                                 |                                                                                                                                                                                         | Retrosposon gag domain [IPRO05162] (1)                                                                                                                                                                                                                                                         | scaffold_2_mRNA_169.1           | -                           | -                               |
| GF0026940 | 1                            | 0                        | 0                            | 0 Hypothetical protein (1)                                                 |                                                                                                                                                                                         |                                                                                                                                                                                                                                                                                                | scaffold_2_mRNA_1681.1          | -                           | -                               |
| GF0026939 | 1                            | 0                        | 0                            | 0 Hypothetical protein (1)                                                 | zinc ion binding [GO:0008270 molecular_function] (1)                                                                                                                                    | Zinc finger, SWIM-type [IPRO07527] (1); Zinc finger, PMZ-type [IPRO006564] (1)                                                                                                                                                                                                                 | scaffold_2_mRNA_1674.1          | -                           | -                               |
| GF0026938 | 1                            | 0                        | 0                            | 0 Hypothetical protein (1)                                                 |                                                                                                                                                                                         |                                                                                                                                                                                                                                                                                                | scaffold_2_mRNA_167.1           | -                           | -                               |
| GF0026937 | 1                            | 0                        | 0                            | 0 Hypothetical protein (1)                                                 |                                                                                                                                                                                         |                                                                                                                                                                                                                                                                                                | scaffold_2_mRNA_1668.1          | -                           | -                               |
| GF0026936 | 1                            | 0                        | 0                            | 0 Hypothetical protein (1)                                                 |                                                                                                                                                                                         | ABC-transporter extension domain [IPRO32781] (1)                                                                                                                                                                                                                                               | scaffold_2_mRNA_1666.1          | -                           | -                               |
| GF0026935 | 1                            | 0                        | 0                            | 0 Hypothetical protein (1)                                                 |                                                                                                                                                                                         |                                                                                                                                                                                                                                                                                                | scaffold_2_mRNA_166.1           | -                           | -                               |
| GF0026934 | 1                            | 0                        | 0                            | 0 Hypothetical protein (1)                                                 |                                                                                                                                                                                         |                                                                                                                                                                                                                                                                                                | scaffold_2_mRNA_1659.1          | -                           | -                               |
| GF0026933 | 1                            | 0                        | 0                            | 0 Cytokinin riboside 5'-monophosphate phosphoribohydrolase (1)             |                                                                                                                                                                                         | LOG family [IPRO31100] (1)                                                                                                                                                                                                                                                                     | scaffold_2_mRNA_1656.1          | -                           | -                               |
| GF0026932 | 1                            | 0                        | 0                            | 0 Hypothetical protein (1)                                                 |                                                                                                                                                                                         |                                                                                                                                                                                                                                                                                                | scaffold_2_mRNA_1655.1          | -                           | -                               |
| GF0026931 | 1                            | 0                        | 0                            | 0 Hypothetical protein (1)                                                 |                                                                                                                                                                                         |                                                                                                                                                                                                                                                                                                | scaffold_2_mRNA_1652.1          | -                           | -                               |
| GF0026930 | 1                            | 0                        | 0                            | 0 Hypothetical protein (1)                                                 |                                                                                                                                                                                         |                                                                                                                                                                                                                                                                                                | scaffold_2_mRNA_1651.1          | -                           | -                               |
| GF0026929 | 1                            | 0                        | 0                            | 0 Retrotransposon protein, putative, Ty3-gypsy subclass (1)                | DNA integration [GO:0015074 biological_process] (1); RNA-DNA hybrid ribonuclease activity [GO:0004523 molecular_function] (1); nucleic acid binding [GO:0003676 molecular_function] (1) | Ribonuclease H domain [IPRO02156] (1); Ribonuclease H-like domain [IPRO12337] (1); Integrase, catalytic core [IPRO01584] (1); Aspartic peptidase domain [IPRO21109] (1); Retrosposon gag domain [IPRO05162] (1); LOG family [IPRO31100] (1); Retrosposon gag domain [IPRO05162] (1)            | scaffold_2_mRNA_1650.1          | -                           | -                               |
| GF0026928 | 1                            | 0                        | 0                            | 0 Hypothetical protein (1)                                                 |                                                                                                                                                                                         |                                                                                                                                                                                                                                                                                                | scaffold_2_mRNA_165.1           | -                           | -                               |
| GF0026927 | 1                            | 0                        | 0                            | 0 Hypothetical protein (1)                                                 |                                                                                                                                                                                         |                                                                                                                                                                                                                                                                                                | scaffold_2_mRNA_1647.1          | -                           | -                               |
| GF0026926 | 1                            | 0                        | 0                            | 0 Hypothetical protein (1)                                                 |                                                                                                                                                                                         |                                                                                                                                                                                                                                                                                                | scaffold_2_mRNA_1643.1          | -                           | -                               |
| GF0026925 | 1                            | 0                        | 0                            | 0 Hypothetical protein (1)                                                 |                                                                                                                                                                                         |                                                                                                                                                                                                                                                                                                | scaffold_2_mRNA_1642.1          | -                           | -                               |
| GF0026924 | 1                            | 0                        | 0                            | 0 Mutator-like transposase (1)                                             |                                                                                                                                                                                         | Transposase, MuDR, plant [IPRO04332] (1); MULE transposase domain [IPRO18289] (1)                                                                                                                                                                                                              | scaffold_2_mRNA_1636.1          | -                           | -                               |
| GF0026923 | 1                            | 0                        | 0                            | 0 Hypothetical protein (1)                                                 |                                                                                                                                                                                         | Domain of unknown function DUF4371 [IPRO25398] (1)                                                                                                                                                                                                                                             | scaffold_2_mRNA_1623.1          | -                           | -                               |
| GF0026922 | 1                            | 0                        | 0                            | 0 Hypothetical protein (1)                                                 | proteolysis [GO:0006508 biological_process] (1); cysteine-type peptidase activity [GO:0008234 molecular_function] (1)                                                                   | Domain of unknown function DUF1985 [IPRO15410] (1); Ulp1 protease family, C-terminal catalytic domain [IPRO03653] (1)                                                                                                                                                                          | scaffold_2_mRNA_1620.1          | -                           | -                               |
| GF0026921 | 1                            | 0                        | 0                            | 0 Hypothetical protein (1)                                                 |                                                                                                                                                                                         | Viral movement protein [IPRO28919] (1)                                                                                                                                                                                                                                                         | scaffold_2_mRNA_162.1           | -                           | -                               |
| GF0026920 | 1                            | 0                        | 0                            | 0 Putative muDR family transposase-like (1)                                | zinc ion binding [GO:0008270 molecular_function] (1)                                                                                                                                    | Zinc finger, SWIM-type [IPRO07527] (1); Zinc finger, PMZ-type [IPRO006564] (1); MULE transposase domain [IPRO18289] (1)                                                                                                                                                                        | scaffold_2_mRNA_1619.1          | -                           | -                               |
| GF0026919 | 1                            | 0                        | 0                            | 0 Hypothetical protein (1)                                                 |                                                                                                                                                                                         |                                                                                                                                                                                                                                                                                                | scaffold_2_mRNA_1617.1          | -                           | -                               |
| GF0026918 | 1                            | 0                        | 0                            | 0 Homogenisate phytyltransferase (1)                                       | integral component of membrane [GO:0016021 cellular_component] (1); transferase activity, transferring alkyl or aryl (other than methyl) groups [GO:0016765 molecular_function] (1)     | UbiA prenyltransferase family [IPRO00537] (1)                                                                                                                                                                                                                                                  | scaffold_2_mRNA_1616.1          | -                           | -                               |
| GF0026917 | 1                            | 0                        | 0                            | 0 Hypothetical protein (1)                                                 |                                                                                                                                                                                         | Aspartic peptidase domain [IPRO21109] (1); Retroviral aspartyl protease [IPRO13242] (1)                                                                                                                                                                                                        | scaffold_2_mRNA_1615.1          | -                           | -                               |
| GF0026916 | 1                            | 0                        | 0                            | 0 Hypothetical protein (1)                                                 |                                                                                                                                                                                         | Alpha/Beta hydrolase fold [IPRO29058] (1)                                                                                                                                                                                                                                                      | scaffold_2_mRNA_1611.1          | -                           | -                               |
| GF0026915 | 1                            | 0                        | 0                            | 0 Hypothetical protein (1)                                                 |                                                                                                                                                                                         |                                                                                                                                                                                                                                                                                                | scaffold_2_mRNA_1610.1          | -                           | -                               |
| GF0026914 | 1                            | 0                        | 0                            | 0 Hypothetical protein (1)                                                 |                                                                                                                                                                                         |                                                                                                                                                                                                                                                                                                | scaffold_2_mRNA_161.1           | -                           | -                               |
| GF0026913 | 1                            | 0                        | 0                            | 0 Hypothetical protein (1)                                                 |                                                                                                                                                                                         |                                                                                                                                                                                                                                                                                                | scaffold_2_mRNA_1606.1          | -                           | -                               |
| GF0026912 | 1                            | 0                        | 0                            | 0 Hypothetical protein (1)                                                 |                                                                                                                                                                                         |                                                                                                                                                                                                                                                                                                | scaffold_2_mRNA_1601.1          | -                           | -                               |
| GF0026911 | 1                            | 0                        | 0                            | 0 Hypothetical protein (1)                                                 |                                                                                                                                                                                         |                                                                                                                                                                                                                                                                                                | scaffold_2_mRNA_160.1           | -                           | -                               |
| GF0026910 | 1                            | 0                        | 0                            | 0 Hypothetical protein (1)                                                 |                                                                                                                                                                                         |                                                                                                                                                                                                                                                                                                | scaffold_2_mRNA_1596.1          | -                           | -                               |
| GF0026909 | 1                            | 0                        | 0                            | 0 Monosaccharide transport protein (1)                                     |                                                                                                                                                                                         |                                                                                                                                                                                                                                                                                                | scaffold_2_mRNA_1595.1          | -                           | -                               |
| GF0026908 | 1                            | 0                        | 0                            | 0 Hypothetical protein (1)                                                 |                                                                                                                                                                                         |                                                                                                                                                                                                                                                                                                | scaffold_2_mRNA_1594.1          | -                           | -                               |
| GF0026907 | 1                            | 0                        | 0                            | 0 Hypothetical protein (1)                                                 |                                                                                                                                                                                         |                                                                                                                                                                                                                                                                                                | scaffold_2_mRNA_1593.1          | -                           | -                               |
| GF0026906 | 1                            | 0                        | 0                            | 0 Hypothetical protein (1)                                                 |                                                                                                                                                                                         |                                                                                                                                                                                                                                                                                                | scaffold_2_mRNA_1591.1          | -                           | -                               |
| GF0026905 | 1                            | 0                        | 0                            | 0 Hypothetical protein (1)                                                 |                                                                                                                                                                                         |                                                                                                                                                                                                                                                                                                | scaffold_2_mRNA_1590.1          | -                           | -                               |
| GF0026904 | 1                            | 0                        | 0                            | 0 Cytokinin riboside 5'-monophosphate phosphoribohydrolase (1)             |                                                                                                                                                                                         | LOG family [IPRO31100] (1); Cytokinin riboside 5'-monophosphate phosphoribohydrolase LOG [IPRO05269] (1)                                                                                                                                                                                       | scaffold_2_mRNA_159.1           | -                           | -                               |
| GF0026903 | 1                            | 0                        | 0                            | 0 Hypothetical protein (1)                                                 |                                                                                                                                                                                         |                                                                                                                                                                                                                                                                                                | scaffold_2_mRNA_1587.1          | -                           | -                               |
| GF0026902 | 1                            | 0                        | 0                            | 0 Hypothetical protein (1)                                                 |                                                                                                                                                                                         | Aspartic peptidase domain [IPRO21109] (1)                                                                                                                                                                                                                                                      | scaffold_2_mRNA_1580.1          | -                           | -                               |
| GF0026901 | 1                            | 0                        | 0                            | 0 Hypothetical protein (1)                                                 | nucleic acid binding [GO:0003676 molecular_function] (1); zinc ion binding [GO:0008270 molecular_function] (1)                                                                          | Zinc finger, CCHC-type [IPRO01878] (1)                                                                                                                                                                                                                                                         | scaffold_2_mRNA_158.1           | -                           | -                               |
| GF0026900 | 1                            | 0                        | 0                            | 0 Polynucleotidyl transferase, ribonuclease H-like superfamily protein (1) | nucleic acid binding [GO:0003676 molecular_function] (1)                                                                                                                                | Ribonuclease H-like domain [IPRO12337] (1)                                                                                                                                                                                                                                                     | scaffold_2_mRNA_1579.1          | -                           | -                               |
| GF0026899 | 1                            | 0                        | 0                            | 0 ATP-dependent Clp protease ATP-binding subunit clpC (1)                  | protein binding [GO:0005515 molecular_function] (1); ATP binding [GO:0005524 molecular_function] (1)                                                                                    | P-loop containing nucleoside triphosphate hydrolase [IPRO27417] (1); ClpA/B, conserved site 1 [IPRO18368] (1); ATPase, AAA-type, core [IPRO03959] (1); AAA+ ATPase domain [IPRO03593] (1); F-box domain [IPRO01810] (1); ClpA/B family [IPRO01270] (1)                                         | scaffold_2_mRNA_1572.1          | -                           | -                               |
| GF0026898 | 1                            | 0                        | 0                            | 0 Hypothetical protein (1)                                                 |                                                                                                                                                                                         |                                                                                                                                                                                                                                                                                                | scaffold_2_mRNA_1568.1          | -                           | -                               |
| GF0026897 | 1                            | 0                        | 0                            | 0 Subtilisin-like serine protease (1)                                      | serine-type endopeptidase activity [GO:0004252 molecular_function] (1); proteolysis [GO:0006508 biological_process] (1)                                                                 | Peptidase S8, subtilisin-related [IPRO15500] (1); Peptidase S8, subtilisin, Asp-active site [IPRO23827] (1); PA domain [IPRO03137] (1); Peptidase S8/S5 domain [IPRO02099] (1); Cucumis-like catalytic domain [IPRO34197] (1); Peptidase S8 propeptide/proteinase inhibitor I9 [IPRO10259] (1) | scaffold_2_mRNA_1566.1          | -                           | -                               |
| GF0026896 | 1                            | 0                        | 0                            | 0 Hypothetical protein (1)                                                 |                                                                                                                                                                                         |                                                                                                                                                                                                                                                                                                | scaffold_2_mRNA_1565.1          | -                           | -                               |
| GF0026895 | 1                            | 0                        | 0                            | 0 Cytokinin riboside 5'-monophosphate phosphoribohydrolase (1)             |                                                                                                                                                                                         | LOG family [IPRO31100] (1)                                                                                                                                                                                                                                                                     | scaffold_2_mRNA_1564.1          | -                           | -                               |
| GF0026894 | 1                            | 0                        | 0                            | 0 Subtilisin-like serine protease (1)                                      | serine-type endopeptidase activity [GO:0004252 molecular_function] (1); proteolysis [GO:0006508 biological_process] (1)                                                                 | Peptidase S8 propeptide/proteinase inhibitor I9 [IPRO10259] (1); Peptidase S8, subtilisin-related [IPRO15500] (1); Peptidase S8, subtilisin, Asp-active site [IPRO23827] (1); Peptidase S8/S5 domain [IPRO02099] (1); Cucumis-like catalytic domain [IPRO34197] (1)                            | scaffold_2_mRNA_1562.1          | -                           | -                               |
| GF0026893 | 1                            | 0                        | 0                            | 0 Hypothetical protein (1)                                                 |                                                                                                                                                                                         |                                                                                                                                                                                                                                                                                                | scaffold_2_mRNA_1558.1          | -                           | -                               |
| GF0026892 | 1                            | 0                        | 0                            | 0 Hypothetical protein (1)                                                 |                                                                                                                                                                                         |                                                                                                                                                                                                                                                                                                | scaffold_2_mRNA_1553.1          | -                           | -                               |
| GF0026891 | 1                            | 0                        | 0                            | 0 Hypothetical protein (1)                                                 |                                                                                                                                                                                         |                                                                                                                                                                                                                                                                                                | scaffold_2_mRNA_1549.1          | -                           | -                               |
| GF0026890 | 1                            | 0                        | 0                            | 0 Hypothetical protein (1)                                                 |                                                                                                                                                                                         |                                                                                                                                                                                                                                                                                                | scaffold_2_mRNA_1545.1          | -                           | -                               |
| GF0026889 | 1                            | 0                        | 0                            | 0 Hypothetical protein (1)                                                 |                                                                                                                                                                                         |                                                                                                                                                                                                                                                                                                | scaffold_2_mRNA_1540.1          | -                           | -                               |
| GF0026888 | 1                            | 0                        | 0                            | 0 Hypothetical protein (1)                                                 |                                                                                                                                                                                         |                                                                                                                                                                                                                                                                                                | scaffold_2_mRNA_1528.1          | -                           | -                               |
| GF0026887 | 1                            | 0                        | 0                            | 0 Hypothetical protein (1)                                                 |                                                                                                                                                                                         |                                                                                                                                                                                                                                                                                                | scaffold_2_mRNA_1527.1          | -                           | -                               |

| ID        | Num. in <i>C. clementiae</i> | Num. in <i>C. uchiha</i> | Num. in <i>P. trifoliata</i> | Note                                                                       | GO                                                                                                                                                                                                                                                                                                                | InterPro                                                                                                                                                                                                                                                                                                                                         | Members in <i>C. clementiae</i> | Members in <i>C. uchiha</i> | Members in <i>P. trifoliata</i> |
|-----------|------------------------------|--------------------------|------------------------------|----------------------------------------------------------------------------|-------------------------------------------------------------------------------------------------------------------------------------------------------------------------------------------------------------------------------------------------------------------------------------------------------------------|--------------------------------------------------------------------------------------------------------------------------------------------------------------------------------------------------------------------------------------------------------------------------------------------------------------------------------------------------|---------------------------------|-----------------------------|---------------------------------|
| GF0026886 | 1                            | 0                        | 0                            | 0 Hypothetical protein (1)                                                 | transmembrane transport [GO:0055085 biological_process] (1); calcium ion binding [GO:0005509 molecular_function] (1); zinc ion binding [GO:0008270 molecular_function] (1)                                                                                                                                        | EF-Hand 1, calcium-binding site [IPRO18247] (1); EF-hand domain [IPRO20285] (1); Mitochondrial carrier protein [IPRO02067] (1); Zinc finger, GRF-type [IPRO10666] (1); Mitochondrial carrier domain [IPRO23395] (1); EF-hand domain pair [IPRO11992] (1); Mitochondrial substrate/solute carrier [IPRO18108] (1)                                 | scaffold_2_mRNA_1523.1          | -                           | -                               |
| GF0026885 | 1                            | 0                        | 0                            | 0 Hypothetical protein (1)                                                 |                                                                                                                                                                                                                                                                                                                   |                                                                                                                                                                                                                                                                                                                                                  | scaffold_2_mRNA_1521.1          | -                           | -                               |
| GF0026884 | 1                            | 0                        | 0                            | 0 Hypothetical protein (1)                                                 |                                                                                                                                                                                                                                                                                                                   | LOG family [IPRO31100] (1)                                                                                                                                                                                                                                                                                                                       | scaffold_2_mRNA_152.1           | -                           | -                               |
| GF0026883 | 1                            | 0                        | 0                            | 0 Polynucleotidyl transferase, Ribonuclease H fold (1)                     | nucleic acid binding [GO:0003676 molecular_function] (1)                                                                                                                                                                                                                                                          | Reverse transcriptase zinc-binding domain [IPRO25960] (1); Ribonuclease H-like domain [IPRO12337] (1)                                                                                                                                                                                                                                            | scaffold_2_mRNA_1511.1          | -                           | -                               |
| GF0026882 | 1                            | 0                        | 0                            | 0 Pentatricopeptide (1)                                                    | zinc ion binding [GO:0008270 molecular_function] (1); protein binding [GO:0005515 molecular_function] (1)                                                                                                                                                                                                         | Tetratricopeptide-like helical domain [IPRO11990] (1); Pentatricopeptide repeat [IPRO2385] (1); DYW domain [IPRO32867] (1)                                                                                                                                                                                                                       | scaffold_2_mRNA_1506.1          | -                           | -                               |
| GF0026881 | 1                            | 0                        | 0                            | 0 Hypothetical protein (1)                                                 |                                                                                                                                                                                                                                                                                                                   |                                                                                                                                                                                                                                                                                                                                                  | scaffold_2_mRNA_1502.1          | -                           | -                               |
| GF0026880 | 1                            | 0                        | 0                            | 0 Glyceraldehyde-3-phosphate 0 dehydrogenase (NADP+) (Phosphorylating) (1) | oxidation-reduction process [GO:0055114 biological_process] (1); oxidoreductase activity, acting on the aldehyde or oxo group of donors, NAD or NADP as acceptor [GO:0016620 molecular_function] (1)                                                                                                              | Glyceraldehyde 3-phosphate dehydrogenase, catalytic domain [IPRO2029] (1); Glyceraldehyde 3-phosphate dehydrogenase, NAD(P) binding domain [IPRO20828] (1); Glyceraldehyde-Erytrose phosphate dehydrogenase family [IPRO20831] (1); Glyceraldehyde 3-phosphate dehydrogenase, active site [IPRO20830] (1); NAD(P)-binding domain [IPRO16040] (1) | scaffold_2_mRNA_1497.1          | -                           | -                               |
| GF0026879 | 1                            | 0                        | 0                            | 0 Hypothetical protein (1)                                                 |                                                                                                                                                                                                                                                                                                                   |                                                                                                                                                                                                                                                                                                                                                  | scaffold_2_mRNA_1496.1          | -                           | -                               |
| GF0026878 | 1                            | 0                        | 0                            | 0 Hypothetical protein (1)                                                 | protein binding [GO:0005515 molecular_function] (1)                                                                                                                                                                                                                                                               | Pentatricopeptide repeat [IPRO2885] (1); Tetratricopeptide-like helical domain [IPRO11990] (1)                                                                                                                                                                                                                                                   | scaffold_2_mRNA_1492.1          | -                           | -                               |
| GF0026877 | 1                            | 0                        | 0                            | 0 Hypothetical protein (1)                                                 | translation elongation factor activity [GO:0007346 molecular_function] (1); translational elongation [GO:0006414 biological_process] (1)                                                                                                                                                                          | Translation elongation factor EF1B, beta/delta subunit, guanine nucleotide exchange domain [IPRO14038] (1); Protein-like domain [IPRO05502] (1); Translation elongation factor EF1B/ribosomal protein S6 [IPRO14717] (1)                                                                                                                         | scaffold_2_mRNA_1490.1          | -                           | -                               |
| GF0026876 | 1                            | 0                        | 0                            | 0 Hypothetical protein (1)                                                 |                                                                                                                                                                                                                                                                                                                   |                                                                                                                                                                                                                                                                                                                                                  | scaffold_2_mRNA_149.1           | -                           | -                               |
| GF0026875 | 1                            | 0                        | 0                            | 0 Eukaryotic peptide chain release factor subunit 1-3 (1)                  | cytoplasm [GO:0005737 cellular_component] (1); translation release factor activity, codon specific [GO:0015297 molecular_function] (1); translational termination [GO:0006415 biological_process] (1)                                                                                                             | Peptide Chain Release Factor eRF1a/RF1, N-terminal [IPRO24049] (1); S6S ribosomal protein L30e-like [IPRO2064] (1); eRF1 domain 3 [IPRO05142] (1); eRF1 domain 2 [IPRO05141] (1); Peptide chain release factor eRF1a/RF1 [IPRO04403] (1); eRF1 domain 1/Peptide-like [IPRO05140] (1)                                                             | scaffold_2_mRNA_1484.1          | -                           | -                               |
| GF0026874 | 1                            | 0                        | 0                            | 0 Protein TRANSPARENT TESTA 12 (1)                                         | drug transmembrane transport [GO:0006855 biological_process] (1); membrane [GO:0016020 cellular_component] (1); antiporter activity [GO:0015297 molecular_function] (1); drug transmembrane transporter activity [GO:0015238 molecular_function] (1); transmembrane transport [GO:0055085 biological_process] (1) | Multi antimicrobial extrusion protein [IPRO2528] (1)                                                                                                                                                                                                                                                                                             | scaffold_2_mRNA_1478.1          | -                           | -                               |
| GF0026873 | 1                            | 0                        | 0                            | 0 Hypothetical protein (1)                                                 | nucleic acid binding [GO:0003676 molecular_function] (1)                                                                                                                                                                                                                                                          | Ribonuclease H-like domain [IPRO12337] (1); Reverse transcriptase zinc-binding domain [IPRO25960] (1)                                                                                                                                                                                                                                            | scaffold_2_mRNA_1477.1          | -                           | -                               |
| GF0026872 | 1                            | 0                        | 0                            | 0 Hypothetical protein (1)                                                 |                                                                                                                                                                                                                                                                                                                   |                                                                                                                                                                                                                                                                                                                                                  | scaffold_2_mRNA_1474.1          | -                           | -                               |
| GF0026871 | 1                            | 0                        | 0                            | 0 Hypothetical protein (1)                                                 |                                                                                                                                                                                                                                                                                                                   |                                                                                                                                                                                                                                                                                                                                                  | scaffold_2_mRNA_1468.1          | -                           | -                               |
| GF0026870 | 1                            | 0                        | 0                            | 0 Ras-related protein RABA1f (1)                                           | GTPase activity [GO:0003924 molecular_function] (1); GTP binding [GO:0005525 molecular_function] (1); zinc ion binding [GO:0008270 molecular_function] (1)                                                                                                                                                        | Small GTP-binding protein domain [IPRO05225] (1); Small GTPase superfamily [IPRO01800] (1); P-loop containing nucleoside triphosphate hydrolase [IPRO27417] (1); DYW domain [IPRO32867] (1)                                                                                                                                                      | scaffold_2_mRNA_1464.1          | -                           | -                               |
| GF0026869 | 1                            | 0                        | 0                            | 0 Hypothetical protein (1)                                                 |                                                                                                                                                                                                                                                                                                                   |                                                                                                                                                                                                                                                                                                                                                  | scaffold_2_mRNA_1463.1          | -                           | -                               |
| GF0026868 | 1                            | 0                        | 0                            | 0 Hypothetical protein (1)                                                 |                                                                                                                                                                                                                                                                                                                   |                                                                                                                                                                                                                                                                                                                                                  | scaffold_2_mRNA_1459.1          | -                           | -                               |
| GF0026867 | 1                            | 0                        | 0                            | 0 Cytokinin riboside 5'-monophosphate phosphoribohydrolase (1)             |                                                                                                                                                                                                                                                                                                                   | Cytokinin riboside 5'-monophosphate phosphoribohydrolase LOG [IPRO05269] (1); LOG family [IPRO31100] (1)                                                                                                                                                                                                                                         | scaffold_2_mRNA_1445.1          | -                           | -                               |
| GF0026866 | 1                            | 0                        | 0                            | 0 Hypothetical protein (1)                                                 |                                                                                                                                                                                                                                                                                                                   |                                                                                                                                                                                                                                                                                                                                                  | scaffold_2_mRNA_1444.1          | -                           | -                               |
| GF0026865 | 1                            | 0                        | 0                            | 0 Hypothetical protein (1)                                                 | cysteine-type peptidase activity [GO:000224 molecular_function] (1); proteolysis [GO:0006508 biological_process] (1)                                                                                                                                                                                              | Peptidase C1A [IPRO13128] (1); Peptidase C1A, papain C-terminal [IPRO00668] (1)                                                                                                                                                                                                                                                                  | scaffold_2_mRNA_1434.1          | -                           | -                               |
| GF0026864 | 1                            | 0                        | 0                            | 0 Hypothetical protein (1)                                                 |                                                                                                                                                                                                                                                                                                                   | LOG family [IPRO31100] (1)                                                                                                                                                                                                                                                                                                                       | scaffold_2_mRNA_1432.1          | -                           | -                               |
| GF0026863 | 1                            | 0                        | 0                            | 0 Hypothetical protein (1)                                                 |                                                                                                                                                                                                                                                                                                                   |                                                                                                                                                                                                                                                                                                                                                  | scaffold_2_mRNA_1429.1          | -                           | -                               |
| GF0026862 | 1                            | 0                        | 0                            | 0 Hypothetical protein (1)                                                 |                                                                                                                                                                                                                                                                                                                   |                                                                                                                                                                                                                                                                                                                                                  | scaffold_2_mRNA_1422.1          | -                           | -                               |
| GF0026861 | 1                            | 0                        | 0                            | 0 Hypothetical protein (1)                                                 |                                                                                                                                                                                                                                                                                                                   |                                                                                                                                                                                                                                                                                                                                                  | scaffold_2_mRNA_1414.1          | -                           | -                               |
| GF0026860 | 1                            | 0                        | 0                            | 0 Hypothetical protein (1)                                                 |                                                                                                                                                                                                                                                                                                                   | 14-3-3 domain [IPRO23410] (1)                                                                                                                                                                                                                                                                                                                    | scaffold_2_mRNA_1412.1          | -                           | -                               |
| GF0026859 | 1                            | 0                        | 0                            | 0 Hypothetical protein (1)                                                 |                                                                                                                                                                                                                                                                                                                   |                                                                                                                                                                                                                                                                                                                                                  | scaffold_2_mRNA_1410.1          | -                           | -                               |
| GF0026858 | 1                            | 0                        | 0                            | 0 Hypothetical protein (1)                                                 |                                                                                                                                                                                                                                                                                                                   |                                                                                                                                                                                                                                                                                                                                                  | scaffold_2_mRNA_1409.1          | -                           | -                               |
| GF0026857 | 1                            | 0                        | 0                            | 0 Hypothetical protein (1)                                                 |                                                                                                                                                                                                                                                                                                                   |                                                                                                                                                                                                                                                                                                                                                  | scaffold_2_mRNA_1399.1          | -                           | -                               |
| GF0026856 | 1                            | 0                        | 0                            | 0 Hypothetical protein (1)                                                 |                                                                                                                                                                                                                                                                                                                   |                                                                                                                                                                                                                                                                                                                                                  | scaffold_2_mRNA_1395.1          | -                           | -                               |
| GF0026855 | 1                            | 0                        | 0                            | 0 Hypothetical protein (1)                                                 |                                                                                                                                                                                                                                                                                                                   | Aspartic peptidase domain [IPRO21109] (1); Retrotransposon gag domain [IPRO05162] (1)                                                                                                                                                                                                                                                            | scaffold_2_mRNA_1390.1          | -                           | -                               |
| GF0026854 | 1                            | 0                        | 0                            | 0 Cytokinin riboside 5'-monophosphate phosphoribohydrolase (1)             | protein binding [GO:0005515 molecular_function] (1); membrane [GO:0016020 cellular_component] (1); intracellular protein transport [GO:0006886 biological_process] (1); SNAP receptor activity [GO:0005484 molecular_function] (1)                                                                                | LOG family [IPRO31100] (1); Synjatin/gimjatin, conserved site [IPRO06012] (1); Target SNARE coiled-coil homology domain [IPRO00727] (1)                                                                                                                                                                                                          | scaffold_2_mRNA_139.1           | -                           | -                               |
| GF0026853 | 1                            | 0                        | 0                            | 0 Hypothetical protein (1)                                                 |                                                                                                                                                                                                                                                                                                                   |                                                                                                                                                                                                                                                                                                                                                  | scaffold_2_mRNA_1389.1          | -                           | -                               |
| GF0026852 | 1                            | 0                        | 0                            | 0 Hypothetical protein (1)                                                 |                                                                                                                                                                                                                                                                                                                   |                                                                                                                                                                                                                                                                                                                                                  | scaffold_2_mRNA_1382.1          | -                           | -                               |
| GF0026851 | 1                            | 0                        | 0                            | 0 Hypothetical protein (1)                                                 |                                                                                                                                                                                                                                                                                                                   |                                                                                                                                                                                                                                                                                                                                                  | scaffold_2_mRNA_1381.1          | -                           | -                               |
| GF0026850 | 1                            | 0                        | 0                            | 0 Hypothetical protein (1)                                                 |                                                                                                                                                                                                                                                                                                                   |                                                                                                                                                                                                                                                                                                                                                  | scaffold_2_mRNA_1380.1          | -                           | -                               |
| GF0026849 | 1                            | 0                        | 0                            | 0 Hypothetical protein (1)                                                 |                                                                                                                                                                                                                                                                                                                   | LOG family [IPRO31100] (1)                                                                                                                                                                                                                                                                                                                       | scaffold_2_mRNA_138.1           | -                           | -                               |
| GF0026848 | 1                            | 0                        | 0                            | 0 Hypothetical protein (1)                                                 |                                                                                                                                                                                                                                                                                                                   |                                                                                                                                                                                                                                                                                                                                                  | scaffold_2_mRNA_137.1           | -                           | -                               |
| GF0026847 | 1                            | 0                        | 0                            | 0 Hypothetical protein (1)                                                 |                                                                                                                                                                                                                                                                                                                   | LOG family [IPRO31100] (1)                                                                                                                                                                                                                                                                                                                       | scaffold_2_mRNA_136.1           | -                           | -                               |
| GF0026846 | 1                            | 0                        | 0                            | 0 O-methyltransferase ZRP4 (1)                                             | O-methyltransferase activity [GO:0008171 molecular_function] (1); methyltransferase activity [GO:0008168 molecular_function] (1)                                                                                                                                                                                  | S-adenosyl-L-methionine-dependent methyltransferase [IPRO20663] (1); Winged helix-turn-helix DNA-binding domain [IPRO11991] (1); O-methyltransferase, family 2 [IPRO10177] (1); O-methyltransferase COMT-type [IPRO16461] (1)                                                                                                                    | scaffold_2_mRNA_1353.1          | -                           | -                               |
| GF0026845 | 1                            | 0                        | 0                            | 0 Orcinol O-methyltransferase (1)                                          | methyltransferase activity [GO:0008168 molecular_function] (1); protein dimerization activity [GO:0046983 molecular_function] (1); O-methyltransferase activity [GO:0008171 molecular_function] (1)                                                                                                               | S-adenosyl-L-methionine-dependent methyltransferase [IPRO20663] (1); O-methyltransferase COMT-type [IPRO16461] (1); Plant methyltransferase dimerization [IPRO12967] (1); Winged helix-turn-helix DNA-binding domain [IPRO11991] (1); O-methyltransferase, family 2 [IPRO10177] (1)                                                              | scaffold_2_mRNA_1352.1          | -                           | -                               |
| GF0026844 | 1                            | 0                        | 0                            | 0 Hypothetical protein (1)                                                 |                                                                                                                                                                                                                                                                                                                   |                                                                                                                                                                                                                                                                                                                                                  | scaffold_2_mRNA_1350.1          | -                           | -                               |
| GF0026843 | 1                            | 0                        | 0                            | 0 Hypothetical protein (1)                                                 |                                                                                                                                                                                                                                                                                                                   |                                                                                                                                                                                                                                                                                                                                                  | scaffold_2_mRNA_135.1           | -                           | -                               |
| GF0026842 | 1                            | 0                        | 0                            | 0 Alcohol acyltransferase (1)                                              | transferase activity, transferring acyl groups other than amino-acyl groups [GO:0016747 molecular_function] (1)                                                                                                                                                                                                   | Transferase [IPRO03480] (1)                                                                                                                                                                                                                                                                                                                      | scaffold_2_mRNA_1342.1          | -                           | -                               |
| GF0026841 | 1                            | 0                        | 0                            | 0 Hypothetical protein (1)                                                 | nucleic acid binding [GO:0003676 molecular_function] (1)                                                                                                                                                                                                                                                          | Ribonuclease H-like domain [IPRO12337] (1)                                                                                                                                                                                                                                                                                                       | scaffold_2_mRNA_1339.1          | -                           | -                               |
| GF0026840 | 1                            | 0                        | 0                            | 0 Hypothetical protein (1)                                                 |                                                                                                                                                                                                                                                                                                                   |                                                                                                                                                                                                                                                                                                                                                  | scaffold_2_mRNA_1338.1          | -                           | -                               |
| GF0026839 | 1                            | 0                        | 0                            | 0 Cytokinin riboside 5'-monophosphate phosphoribohydrolase (1)             |                                                                                                                                                                                                                                                                                                                   | LOG family [IPRO31100] (1)                                                                                                                                                                                                                                                                                                                       | scaffold_2_mRNA_132.1           | -                           | -                               |
| GF0026838 | 1                            | 0                        | 0                            | 0 Hypothetical protein (1)                                                 |                                                                                                                                                                                                                                                                                                                   |                                                                                                                                                                                                                                                                                                                                                  | scaffold_2_mRNA_1319.1          | -                           | -                               |
| GF0026837 | 1                            | 0                        | 0                            | 0 Disease resistance family protein / LRR family protein, putative (1)     | protein binding [GO:0005515 molecular_function] (1)                                                                                                                                                                                                                                                               | Leucine-rich repeat domain, L domain-like [IPRO32675] (1); Leucine-rich repeat, typical subtype [IPRO03591] (1); Leucine-rich repeat [IPRO01611] (1); Leucine-rich repeat-containing N-terminal, plant-type [IPRO13210] (1)                                                                                                                      | scaffold_2_mRNA_1313.1          | -                           | -                               |

| ID        | Num. in <i>C. clematitae</i> | Num. in <i>C. uchiha</i> | Num. in <i>P. trifoliata</i> | Note                                                                 | GO                                                                                                                                                                                                                                                                                                  | InterPro                                                                                                                                                                                                                                    | Members in <i>Clematitae</i> | Members in <i>Uchiha</i> | Members in <i>P. trifoliata</i> |
|-----------|------------------------------|--------------------------|------------------------------|----------------------------------------------------------------------|-----------------------------------------------------------------------------------------------------------------------------------------------------------------------------------------------------------------------------------------------------------------------------------------------------|---------------------------------------------------------------------------------------------------------------------------------------------------------------------------------------------------------------------------------------------|------------------------------|--------------------------|---------------------------------|
| GF0026836 | 1                            | 0                        | 0                            | Disease resistance family protein / LRR family protein, putative (1) | protein binding [GO:0005515 molecular_function] (1)                                                                                                                                                                                                                                                 | Leucine-rich repeat [IPR001611] (1); Leucine-rich repeat-containing N-terminal, plant-type [IPR013210] (1); Leucine-rich repeat, typical subtype [IPR003591] (1); Leucine-rich repeat domain, L domain-like [IPR032675] (1)                 | scaffold_2_mRNA_1312.1       | -                        | -                               |
| GF0026835 | 1                            | 0                        | 0                            | Hypothetical protein (1)                                             |                                                                                                                                                                                                                                                                                                     |                                                                                                                                                                                                                                             | scaffold_2_mRNA_1311.1       | -                        | -                               |
| GF0026834 | 1                            | 0                        | 0                            | Hypothetical protein (1)                                             |                                                                                                                                                                                                                                                                                                     | Retrotransposon gag domain [IPR005162] (1)                                                                                                                                                                                                  | scaffold_2_mRNA_1310.1       | -                        | -                               |
| GF0026833 | 1                            | 0                        | 0                            | Hypothetical protein (1)                                             |                                                                                                                                                                                                                                                                                                     |                                                                                                                                                                                                                                             | scaffold_2_mRNA_1311.1       | -                        | -                               |
| GF0026832 | 1                            | 0                        | 0                            | Hypothetical protein (1)                                             |                                                                                                                                                                                                                                                                                                     |                                                                                                                                                                                                                                             | scaffold_2_mRNA_1309.1       | -                        | -                               |
| GF0026831 | 1                            | 0                        | 0                            | Hypothetical protein (1)                                             |                                                                                                                                                                                                                                                                                                     |                                                                                                                                                                                                                                             | scaffold_2_mRNA_1308.1       | -                        | -                               |
| GF0026830 | 1                            | 0                        | 0                            | Hypothetical protein (1)                                             |                                                                                                                                                                                                                                                                                                     | Aspartic peptidase domain [IPR021109] (1)                                                                                                                                                                                                   | scaffold_2_mRNA_1307.1       | -                        | -                               |
| GF0026829 | 1                            | 0                        | 0                            | Hypothetical protein (1)                                             | proteolysis [GO:0006508 biological_process] (1); serine-type carboxypeptidase activity [GO:0004185 molecular_function] (1)                                                                                                                                                                          | Peptidase S10, serine carboxypeptidase [IPR01563] (1); Alpha/Beta hydrolase fold [IPR029058] (1)                                                                                                                                            | scaffold_2_mRNA_1303.1       | -                        | -                               |
| GF0026828 | 1                            | 0                        | 0                            | Hypothetical protein (1)                                             | nucleic acid binding [GO:0003676 molecular_function] (1); zinc ion binding [GO:0008270 molecular_function] (1)                                                                                                                                                                                      | Zinc finger, CCHC-type [IPR001878] (1)                                                                                                                                                                                                      | scaffold_2_mRNA_129.1        | -                        | -                               |
| GF0026827 | 1                            | 0                        | 0                            | Hypothetical protein (1)                                             |                                                                                                                                                                                                                                                                                                     |                                                                                                                                                                                                                                             | scaffold_2_mRNA_1289.1       | -                        | -                               |
| GF0026826 | 1                            | 0                        | 0                            | Hypothetical protein (1)                                             | DNA binding [GO:0003677 molecular_function] (1); nucleic acid binding [GO:0003676 molecular_function] (1)                                                                                                                                                                                           | Zinc finger, BED-type [IPR003656] (1); Zinc finger C2H2-type [IPR013087] (1)                                                                                                                                                                | scaffold_2_mRNA_1288.1       | -                        | -                               |
| GF0026825 | 1                            | 0                        | 0                            | HAT family dimerisation domain containing protein (1)                | protein dimerization activity [GO:0046983 molecular_function] (1); nucleic acid binding [GO:0003676 molecular_function] (1); DNA binding [GO:0003677 molecular_function] (1)                                                                                                                        | hAT-like transposase, RNase-H fold [IPR025525] (1); Ribonuclease H-like domain [IPR012337] (1); HAT, C-terminal dimerisation domain [IPR008996] (1)                                                                                         | scaffold_2_mRNA_1284.1       | -                        | -                               |
| GF0026824 | 1                            | 0                        | 0                            | Hypothetical protein (1)                                             |                                                                                                                                                                                                                                                                                                     |                                                                                                                                                                                                                                             | scaffold_2_mRNA_128.1        | -                        | -                               |
| GF0026823 | 1                            | 0                        | 0                            | Non-LTR retroelement reverse transcriptase (1)                       |                                                                                                                                                                                                                                                                                                     | Reverse transcriptase zinc-binding domain [IPR026960] (1)                                                                                                                                                                                   | scaffold_2_mRNA_1274.1       | -                        | -                               |
| GF0026822 | 1                            | 0                        | 0                            | Hypothetical protein (1)                                             |                                                                                                                                                                                                                                                                                                     |                                                                                                                                                                                                                                             | scaffold_2_mRNA_1271.1       | -                        | -                               |
| GF0026821 | 1                            | 0                        | 0                            | Pre-mRNA-processing protein es2 (1)                                  |                                                                                                                                                                                                                                                                                                     |                                                                                                                                                                                                                                             | scaffold_2_mRNA_1270.1       | -                        | -                               |
| GF0026820 | 1                            | 0                        | 0                            | Early nodulin 8 family protein (1)                                   | protein binding [GO:0005515 molecular_function] (1); hydrolase activity, acting on ester bonds [GO:0016788 molecular_function] (1)                                                                                                                                                                  | Tetratricopeptide-like helical domain [IPR011990] (1); Pentatricopeptide repeat [IPR002885] (1); GDSL lipase/esterase [IPR001087] (1)                                                                                                       | scaffold_2_mRNA_1264.1       | -                        | -                               |
| GF0026819 | 1                            | 0                        | 0                            | Hypothetical protein (1)                                             | generation of catalytic-spliceosome for second transesterification step [GO:0000350 biological_process] (1)                                                                                                                                                                                         | Pre-mRNA-splicing factor 1 [IPR009360] (1)                                                                                                                                                                                                  | scaffold_2_mRNA_1262.1       | -                        | -                               |
| GF0026818 | 1                            | 0                        | 0                            | Hypothetical protein (1)                                             |                                                                                                                                                                                                                                                                                                     |                                                                                                                                                                                                                                             | scaffold_2_mRNA_1261.1       | -                        | -                               |
| GF0026817 | 1                            | 0                        | 0                            | Hypothetical protein (1)                                             |                                                                                                                                                                                                                                                                                                     |                                                                                                                                                                                                                                             | scaffold_2_mRNA_126.1        | -                        | -                               |
| GF0026816 | 1                            | 0                        | 0                            | Hypothetical protein (1)                                             |                                                                                                                                                                                                                                                                                                     |                                                                                                                                                                                                                                             | scaffold_2_mRNA_1228.1       | -                        | -                               |
| GF0026815 | 1                            | 0                        | 0                            | Hypothetical protein (1)                                             |                                                                                                                                                                                                                                                                                                     |                                                                                                                                                                                                                                             | scaffold_2_mRNA_1204.1       | -                        | -                               |
| GF0026814 | 1                            | 0                        | 0                            | Hypothetical protein (1)                                             |                                                                                                                                                                                                                                                                                                     |                                                                                                                                                                                                                                             | scaffold_2_mRNA_1201.1       | -                        | -                               |
| GF0026813 | 1                            | 0                        | 0                            | RNA-directed DNA polymerase, related (1)                             |                                                                                                                                                                                                                                                                                                     |                                                                                                                                                                                                                                             | scaffold_2_mRNA_1199.1       | -                        | -                               |
| GF0026812 | 1                            | 0                        | 0                            | Phosphate/phosphomolybdate translocator (1)                          |                                                                                                                                                                                                                                                                                                     | Sugar phosphate transporter domain [IPR004853] (1)                                                                                                                                                                                          | scaffold_2_mRNA_1190.1       | -                        | -                               |
| GF0026811 | 1                            | 0                        | 0                            | Alpha-amylase type B isozyme (1)                                     | alpha-amylase activity [GO:0004556 molecular_function] (1); carbohydrate metabolic process [GO:0005975 biological_process] (1); catalytic activity [GO:0003524 molecular_function] (1); calcium ion binding [GO:0000509 molecular_function] (1); cation binding [GO:0043169 molecular_function] (1) | Glycoside hydrolase superfamily [IPR017853] (1); Alpha amylase [IPR006046] (1); Glycosyl hydrolase, family 13, catalytic domain [IPR006047] (1); Alpha-amylase, C-terminal beta-sheet [IPR012850] (1); Alpha-amylase, plant [IPR013775] (1) | scaffold_2_mRNA_1183.1       | -                        | -                               |
| GF0026810 | 1                            | 0                        | 0                            | Hypothetical protein (1)                                             |                                                                                                                                                                                                                                                                                                     | LOG family [IPR031100] (1)                                                                                                                                                                                                                  | scaffold_2_mRNA_117.1        | -                        | -                               |
| GF0026809 | 1                            | 0                        | 0                            | Hypothetical protein (1)                                             |                                                                                                                                                                                                                                                                                                     |                                                                                                                                                                                                                                             | scaffold_2_mRNA_116.1        | -                        | -                               |
| GF0026808 | 1                            | 0                        | 0                            | Hypothetical protein (1)                                             |                                                                                                                                                                                                                                                                                                     |                                                                                                                                                                                                                                             | scaffold_2_mRNA_115.1        | -                        | -                               |
| GF0026807 | 1                            | 0                        | 0                            | UDP-glucosyltransferase 73CS (1)                                     | metabolic process [GO:0008152 biological_process] (1); transferase activity, transferring hexosyl groups [GO:0016758 molecular_function] (1)                                                                                                                                                        | UDP-glucosyltransferase [IPR002213] (1)                                                                                                                                                                                                     | scaffold_2_mRNA_1142.1       | -                        | -                               |
| GF0026806 | 1                            | 0                        | 0                            | Monosaccharide transport protein (1)                                 |                                                                                                                                                                                                                                                                                                     |                                                                                                                                                                                                                                             | scaffold_2_mRNA_1137.1       | -                        | -                               |
| GF0026805 | 1                            | 0                        | 0                            | Hypothetical protein (1)                                             |                                                                                                                                                                                                                                                                                                     |                                                                                                                                                                                                                                             | scaffold_2_mRNA_113.1        | -                        | -                               |
| GF0026804 | 1                            | 0                        | 0                            | Hypothetical protein (1)                                             |                                                                                                                                                                                                                                                                                                     |                                                                                                                                                                                                                                             | scaffold_2_mRNA_1117.1       | -                        | -                               |
| GF0026803 | 1                            | 0                        | 0                            | Hypothetical protein (1)                                             |                                                                                                                                                                                                                                                                                                     |                                                                                                                                                                                                                                             | scaffold_2_mRNA_111.1        | -                        | -                               |
| GF0026802 | 1                            | 0                        | 0                            | LRR receptor-like serine/threonine-kinase EFR (1)                    | protein binding [GO:0005515 molecular_function] (1)                                                                                                                                                                                                                                                 | Leucine-rich repeat domain, L domain-like [IPR032675] (1); Protein kinase-like domain [IPR011009] (1); Leucine-rich repeat, typical subtype [IPR003591] (1); Leucine-rich repeat [IPR001611] (1)                                            | scaffold_2_mRNA_1104.1       | -                        | -                               |
| GF0026801 | 1                            | 0                        | 0                            | Hypothetical protein (1)                                             |                                                                                                                                                                                                                                                                                                     |                                                                                                                                                                                                                                             | scaffold_2_mRNA_110.1        | -                        | -                               |
| GF0026800 | 1                            | 0                        | 0                            | Non-LTR retroelement reverse transcriptase (1)                       | nucleic acid binding [GO:0003676 molecular_function] (1)                                                                                                                                                                                                                                            | Ribonuclease H-like domain [IPR012337] (1); Reverse transcriptase zinc-binding domain [IPR026960] (1); LOG family [IPR031100] (1)                                                                                                           | scaffold_2_mRNA_1094.1       | -                        | -                               |
| GF0026799 | 1                            | 0                        | 0                            | Hypothetical protein (1)                                             |                                                                                                                                                                                                                                                                                                     | EF-hand domain pair [IPR011992] (1)                                                                                                                                                                                                         | scaffold_2_mRNA_1080.1       | -                        | -                               |
| GF0026798 | 1                            | 0                        | 0                            | Hypothetical protein (1)                                             |                                                                                                                                                                                                                                                                                                     |                                                                                                                                                                                                                                             | scaffold_2_mRNA_108.1        | -                        | -                               |
| GF0026797 | 1                            | 0                        | 0                            | Transcription factor bHLH36 (1)                                      | DNA binding [GO:0003677 molecular_function] (1); protein dimerization activity [GO:0046983 molecular_function] (1)                                                                                                                                                                                  | Achate-scute transcription factor-related domain [IPR015680] (1); Myc-type, basic helix-loop-helix (bHLH) domain [IPR011598] (1)                                                                                                            | scaffold_2_mRNA_1046.1       | -                        | -                               |
| GF0026796 | 1                            | 0                        | 0                            | Transcription factor bHLH36 (1)                                      | protein dimerization activity [GO:0046983 molecular_function] (1); DNA binding [GO:0003677 molecular_function] (1)                                                                                                                                                                                  | Achate-scute transcription factor-related domain [IPR015680] (1); Myc-type, basic helix-loop-helix (bHLH) domain [IPR011598] (1)                                                                                                            | scaffold_2_mRNA_1045.1       | -                        | -                               |
| GF0026795 | 1                            | 0                        | 0                            | Hypothetical protein (1)                                             |                                                                                                                                                                                                                                                                                                     |                                                                                                                                                                                                                                             | scaffold_2_mRNA_103.1        | -                        | -                               |
| GF0026794 | 1                            | 0                        | 0                            | Hypothetical protein (1)                                             |                                                                                                                                                                                                                                                                                                     |                                                                                                                                                                                                                                             | scaffold_2_mRNA_1029.1       | -                        | -                               |
| GF0026793 | 1                            | 0                        | 0                            | Hypothetical protein (1)                                             |                                                                                                                                                                                                                                                                                                     |                                                                                                                                                                                                                                             | scaffold_2_mRNA_1017.1       | -                        | -                               |
| GF0026792 | 1                            | 0                        | 0                            | Hypothetical protein (1)                                             |                                                                                                                                                                                                                                                                                                     |                                                                                                                                                                                                                                             | scaffold_2_mRNA_1008.1       | -                        | -                               |
| GF0026791 | 1                            | 0                        | 0                            | Hypothetical protein (1)                                             |                                                                                                                                                                                                                                                                                                     |                                                                                                                                                                                                                                             | scaffold_1_mRNA_997.1        | -                        | -                               |
| GF0026790 | 1                            | 0                        | 0                            | Hypothetical protein (1)                                             |                                                                                                                                                                                                                                                                                                     |                                                                                                                                                                                                                                             | scaffold_1_mRNA_995.1        | -                        | -                               |
| GF0026789 | 1                            | 0                        | 0                            | Hypothetical protein (1)                                             |                                                                                                                                                                                                                                                                                                     |                                                                                                                                                                                                                                             | scaffold_1_mRNA_974.1        | -                        | -                               |
| GF0026788 | 1                            | 0                        | 0                            | Hypothetical protein (1)                                             |                                                                                                                                                                                                                                                                                                     |                                                                                                                                                                                                                                             | scaffold_1_mRNA_954.1        | -                        | -                               |
| GF0026787 | 1                            | 0                        | 0                            | Hypothetical protein (1)                                             |                                                                                                                                                                                                                                                                                                     |                                                                                                                                                                                                                                             | scaffold_1_mRNA_95.1         | -                        | -                               |
| GF0026786 | 1                            | 0                        | 0                            | Hypothetical protein (1)                                             |                                                                                                                                                                                                                                                                                                     | Reverse transcriptase domain [IPR004477] (1)                                                                                                                                                                                                | scaffold_1_mRNA_939.1        | -                        | -                               |
| GF0026785 | 1                            | 0                        | 0                            | Hypothetical protein (1)                                             |                                                                                                                                                                                                                                                                                                     |                                                                                                                                                                                                                                             | scaffold_1_mRNA_934.1        | -                        | -                               |
| GF0026784 | 1                            | 0                        | 0                            | Hypothetical protein (1)                                             |                                                                                                                                                                                                                                                                                                     |                                                                                                                                                                                                                                             | scaffold_1_mRNA_921.1        | -                        | -                               |
| GF0026783 | 1                            | 0                        | 0                            | Hypothetical protein (1)                                             |                                                                                                                                                                                                                                                                                                     |                                                                                                                                                                                                                                             | scaffold_1_mRNA_920.1        | -                        | -                               |
| GF0026782 | 1                            | 0                        | 0                            | Hypothetical protein (1)                                             |                                                                                                                                                                                                                                                                                                     |                                                                                                                                                                                                                                             | scaffold_1_mRNA_918.1        | -                        | -                               |
| GF0026781 | 1                            | 0                        | 0                            | Hypothetical protein (1)                                             | DNA binding [GO:0003677 molecular_function] (1)                                                                                                                                                                                                                                                     | hAT-like transposase, RNase-H fold [IPR025525] (1)                                                                                                                                                                                          | scaffold_1_mRNA_914.1        | -                        | -                               |
| GF0026780 | 1                            | 0                        | 0                            | Hypothetical protein (1)                                             |                                                                                                                                                                                                                                                                                                     |                                                                                                                                                                                                                                             | scaffold_1_mRNA_899.1        | -                        | -                               |
| GF0026779 | 1                            | 0                        | 0                            | Hypothetical protein (1)                                             |                                                                                                                                                                                                                                                                                                     |                                                                                                                                                                                                                                             | scaffold_1_mRNA_898.1        | -                        | -                               |
| GF0026778 | 1                            | 0                        | 0                            | Hypothetical protein (1)                                             | methyltransferase activity [GO:0008168 molecular_function] (1)                                                                                                                                                                                                                                      | S-adenosyl-L-methionine-dependent methyltransferase [IPR029063] (1); Bin3-type S-adenosyl-L-methionine binding domain [IPR024160] (1)                                                                                                       | scaffold_1_mRNA_884.1        | -                        | -                               |
| GF0026777 | 1                            | 0                        | 0                            | 30S ribosomal protein S1 like (1)                                    | nucleic acid binding [GO:0003676 molecular_function] (1); translation elongation factor activity [GO:0003746 molecular_function] (1); translational elongation [GO:0006414 biological_process] (1); intracellular [GO:0005622 cellular_component] (1)                                               | RNA-binding domain, S1 [IPR022967] (1); Translation elongation factor EFTs/EF1B [IPR001816] (1); Nucleic acid-binding, OB-fold [IPR012340] (1); S1 domain [IPR003029] (1)                                                                   | scaffold_1_mRNA_875.1        | -                        | -                               |
| GF0026776 | 1                            | 0                        | 0                            | Translation elongation factor Ts (1)                                 | translation elongation factor activity [GO:0003746 molecular_function] (1); protein binding [GO:0005515 molecular_function] (1); translational elongation [GO:0006414 biological_process] (1); intracellular [GO:0005622 cellular_component] (1)                                                    | Translation elongation factor EFTs/EF1B, dimerisation [IPR014039] (1); UBA-like [IPR009600] (1); Translation elongation factor EFTs/EF1B [IPR001816] (1); Translation elongation factor Ts, conserved site [IPR018101] (1)                  | scaffold_1_mRNA_874.1        | -                        | -                               |
| GF0026775 | 1                            | 0                        | 0                            | Hypothetical protein (1)                                             |                                                                                                                                                                                                                                                                                                     |                                                                                                                                                                                                                                             | scaffold_1_mRNA_869.1        | -                        | -                               |
| GF0026774 | 1                            | 0                        | 0                            | Hypothetical protein (1)                                             |                                                                                                                                                                                                                                                                                                     |                                                                                                                                                                                                                                             | scaffold_1_mRNA_854.1        | -                        | -                               |
| GF0026773 | 1                            | 0                        | 0                            | Transposable element protein, putative (1)                           |                                                                                                                                                                                                                                                                                                     | Aspartic peptidase domain [IPR021109] (1)                                                                                                                                                                                                   | scaffold_1_mRNA_849.1        | -                        | -                               |
| GF0026772 | 1                            | 0                        | 0                            | Hypothetical protein (1)                                             |                                                                                                                                                                                                                                                                                                     |                                                                                                                                                                                                                                             | scaffold_1_mRNA_848.1        | -                        | -                               |
| GF0026771 | 1                            | 0                        | 0                            | Hypothetical protein (1)                                             |                                                                                                                                                                                                                                                                                                     |                                                                                                                                                                                                                                             | scaffold_1_mRNA_833.1        | -                        | -                               |
| GF0026770 | 1                            | 0                        | 0                            | Hypothetical protein (1)                                             |                                                                                                                                                                                                                                                                                                     |                                                                                                                                                                                                                                             | scaffold_1_mRNA_830.1        | -                        | -                               |
| GF0026769 | 1                            | 0                        | 0                            | Putative retroelement pol protein (1)                                |                                                                                                                                                                                                                                                                                                     |                                                                                                                                                                                                                                             | scaffold_1_mRNA_83.1         | -                        | -                               |
| GF0026768 | 1                            | 0                        | 0                            | Cytokinin riboside 5'-monophosphate phosphoribohydrolase (1)         |                                                                                                                                                                                                                                                                                                     | LOG family [IPR031100] (1); Cytokinin riboside 5'-monophosphate phosphoribohydrolase LOG [IPR005269] (1)                                                                                                                                    | scaffold_1_mRNA_829.1        | -                        | -                               |

| ID        | Num. in <i>C. clementiae</i> | Num in <i>C. uutila</i> | Num in <i>P. trifoliate</i> | Note                                                        | GO                                                                                                                                                                                                                                                                                                                                                | InterPro                                                                                                                                                                                                                                                                                                                                | Members in <i>C. clementiae</i> | Members in <i>C. uutila</i> | Members in <i>P. trifoliate</i> |
|-----------|------------------------------|-------------------------|-----------------------------|-------------------------------------------------------------|---------------------------------------------------------------------------------------------------------------------------------------------------------------------------------------------------------------------------------------------------------------------------------------------------------------------------------------------------|-----------------------------------------------------------------------------------------------------------------------------------------------------------------------------------------------------------------------------------------------------------------------------------------------------------------------------------------|---------------------------------|-----------------------------|---------------------------------|
| GF0026767 | 1                            | 0                       | 0                           | 0 Hypothetical protein (1)                                  |                                                                                                                                                                                                                                                                                                                                                   |                                                                                                                                                                                                                                                                                                                                         | scaffold_1_mRNA_828.1           | -                           | -                               |
| GF0026766 | 1                            | 0                       | 0                           | 0 Hypothetical protein (1)                                  | ionotropic glutamate receptor activity [GO:004970 molecular_function] (1); membrane [GO:0016020 cellular_component] (1)                                                                                                                                                                                                                           | Ionotropic glutamate receptor [IPR01320] (1); Solute-binding protein family 3N-terminal domain of ADR [IPR01638] (1); Receptor, ligand binding region [IPR001828] (1); Periplasmic binding protein-like 1 [IPR028082] (1)                                                                                                               | scaffold_1_mRNA_81.1            | -                           | -                               |
| GF0026765 | 1                            | 0                       | 0                           | 0 Hypothetical protein (1)                                  |                                                                                                                                                                                                                                                                                                                                                   |                                                                                                                                                                                                                                                                                                                                         | scaffold_1_mRNA_794.1           | -                           | -                               |
| GF0026764 | 1                            | 0                       | 0                           | 0 Monosaccharide transport protein (1)                      |                                                                                                                                                                                                                                                                                                                                                   |                                                                                                                                                                                                                                                                                                                                         | scaffold_1_mRNA_793.1           | -                           | -                               |
| GF0026763 | 1                            | 0                       | 0                           | 0 Hypothetical protein (1)                                  |                                                                                                                                                                                                                                                                                                                                                   |                                                                                                                                                                                                                                                                                                                                         | scaffold_1_mRNA_789.1           | -                           | -                               |
| GF0026762 | 1                            | 0                       | 0                           | 0 Hypothetical protein (1)                                  |                                                                                                                                                                                                                                                                                                                                                   |                                                                                                                                                                                                                                                                                                                                         | scaffold_1_mRNA_788.1           | -                           | -                               |
| GF0026761 | 1                            | 0                       | 0                           | 0 Hypothetical protein (1)                                  |                                                                                                                                                                                                                                                                                                                                                   | Aspartic peptidase domain [IPR021109] (1)                                                                                                                                                                                                                                                                                               | scaffold_1_mRNA_787.1           | -                           | -                               |
| GF0026760 | 1                            | 0                       | 0                           | 0 Hypothetical protein (1)                                  |                                                                                                                                                                                                                                                                                                                                                   |                                                                                                                                                                                                                                                                                                                                         | scaffold_1_mRNA_785.1           | -                           | -                               |
| GF0026759 | 1                            | 0                       | 0                           | 0 Hypothetical protein (1)                                  |                                                                                                                                                                                                                                                                                                                                                   | Retrovirion gag domain [IPR005162] (1)                                                                                                                                                                                                                                                                                                  | scaffold_1_mRNA_783.1           | -                           | -                               |
| GF0026758 | 1                            | 0                       | 0                           | 0 Hypothetical protein (1)                                  |                                                                                                                                                                                                                                                                                                                                                   |                                                                                                                                                                                                                                                                                                                                         | scaffold_1_mRNA_781.1           | -                           | -                               |
| GF0026757 | 1                            | 0                       | 0                           | 0 General transcription factor IIIH subunit (1)             | core TFIIH complex [GO:0000439 cellular_component] (1); nucleotide-excision repair [GO:0006289 biological_process] (1); ATP-dependent DNA helicase activity [GO:0004003 molecular_function] (1); nucleus [GO:0005634 cellular_component] (1)                                                                                                      | Transcription factor TFIIH subunit p52/Tb2 [IPR004598] (1)                                                                                                                                                                                                                                                                              | scaffold_1_mRNA_771.1           | -                           | -                               |
| GF0026756 | 1                            | 0                       | 0                           | 0 General transcription factor IIIH subunit (1)             | core TFIIH complex [GO:0000439 cellular_component] (1); nucleotide-excision repair [GO:0006289 biological_process] (1); nucleus [GO:0005634 cellular_component] (1); ATP-dependent DNA helicase activity [GO:0004003 molecular_function] (1)                                                                                                      | Transcription factor TFIIH subunit p52/Tb2 [IPR004598] (1)                                                                                                                                                                                                                                                                              | scaffold_1_mRNA_768.1           | -                           | -                               |
| GF0026755 | 1                            | 0                       | 0                           | 0 Hypothetical protein (1)                                  |                                                                                                                                                                                                                                                                                                                                                   | Transcription factor TFIIH subunit p52/Tb2 [IPR004598] (1)                                                                                                                                                                                                                                                                              | scaffold_1_mRNA_761.1           | -                           | -                               |
| GF0026754 | 1                            | 0                       | 0                           | 0 Terpene synthase 21, putative isoform 3 (1)               | magnesium ion binding [GO:0000287 molecular_function] (1); lyase activity [GO:0016829 molecular_function] (1); terpene synthase activity [GO:0010333 molecular_function] (1)                                                                                                                                                                      | Terpene synthase, metal-binding domain [IPR005630] (1); Isoprenoid synthase domain [IPR008949] (1)                                                                                                                                                                                                                                      | scaffold_1_mRNA_759.1           | -                           | -                               |
| GF0026753 | 1                            | 0                       | 0                           | 0 Hypothetical protein (1)                                  |                                                                                                                                                                                                                                                                                                                                                   |                                                                                                                                                                                                                                                                                                                                         | scaffold_1_mRNA_758.1           | -                           | -                               |
| GF0026752 | 1                            | 0                       | 0                           | 0 Hypothetical protein (1)                                  |                                                                                                                                                                                                                                                                                                                                                   |                                                                                                                                                                                                                                                                                                                                         | scaffold_1_mRNA_755.1           | -                           | -                               |
| GF0026751 | 1                            | 0                       | 0                           | 0 Hypothetical protein (1)                                  |                                                                                                                                                                                                                                                                                                                                                   |                                                                                                                                                                                                                                                                                                                                         | scaffold_1_mRNA_736.1           | -                           | -                               |
| GF0026750 | 1                            | 0                       | 0                           | 0 Hypothetical protein (1)                                  |                                                                                                                                                                                                                                                                                                                                                   |                                                                                                                                                                                                                                                                                                                                         | scaffold_1_mRNA_733.1           | -                           | -                               |
| GF0026749 | 1                            | 0                       | 0                           | 0 Hypothetical protein (1)                                  |                                                                                                                                                                                                                                                                                                                                                   |                                                                                                                                                                                                                                                                                                                                         | scaffold_1_mRNA_725.1           | -                           | -                               |
| GF0026748 | 1                            | 0                       | 0                           | 0 Hypothetical protein (1)                                  |                                                                                                                                                                                                                                                                                                                                                   |                                                                                                                                                                                                                                                                                                                                         | scaffold_1_mRNA_723.1           | -                           | -                               |
| GF0026747 | 1                            | 0                       | 0                           | 0 Hypothetical protein (1)                                  |                                                                                                                                                                                                                                                                                                                                                   |                                                                                                                                                                                                                                                                                                                                         | scaffold_1_mRNA_722.1           | -                           | -                               |
| GF0026746 | 1                            | 0                       | 0                           | 0 Retrotransposon protein, putative, Ty1-copia subclass (1) |                                                                                                                                                                                                                                                                                                                                                   |                                                                                                                                                                                                                                                                                                                                         | scaffold_1_mRNA_721.1           | -                           | -                               |
| GF0026745 | 1                            | 0                       | 0                           | 0 NAD-dependent aldehyde dehydrogenase family protein (1)   | metabolic process [GO:0008152 biological_process] (1); oxidation-reduction process [GO:0055114 biological_process] (1); oxidoreductase activity [GO:0016491 molecular_function] (1)                                                                                                                                                               | Aldehyde dehydrogenase N-terminal domain [IPR016162] (1); Aldehyde dehydrogenase, glutamic acid active site [IPR029510] (1); Aldehyde dehydrogenase domain [IPR015590] (1); Aldehyde/histidinol dehydrogenase [IPR016161] (1)                                                                                                           | scaffold_1_mRNA_719.1           | -                           | -                               |
| GF0026744 | 1                            | 0                       | 0                           | 0 Hypothetical protein (1)                                  |                                                                                                                                                                                                                                                                                                                                                   |                                                                                                                                                                                                                                                                                                                                         | scaffold_1_mRNA_707.1           | -                           | -                               |
| GF0026743 | 1                            | 0                       | 0                           | 0 Hypothetical protein (1)                                  |                                                                                                                                                                                                                                                                                                                                                   |                                                                                                                                                                                                                                                                                                                                         | scaffold_1_mRNA_695.1           | -                           | -                               |
| GF0026742 | 1                            | 0                       | 0                           | 0 Nucleic hydrolase 24 (1)                                  |                                                                                                                                                                                                                                                                                                                                                   | Domain of unknown function DUF4743 [IPR01804] (1)                                                                                                                                                                                                                                                                                       | scaffold_1_mRNA_694.1           | -                           | -                               |
| GF0026741 | 1                            | 0                       | 0                           | 0 Hypothetical protein (1)                                  | proteolysis [GO:0006508 biological_process] (1); cysteine-type peptidase activity [GO:0008234 molecular_function] (1)                                                                                                                                                                                                                             | Ulp1 protease family, C-terminal catalytic domain [IPR003653] (1); Domain of unknown function DUF1985 [IPR015410] (1)                                                                                                                                                                                                                   | scaffold_1_mRNA_692.1           | -                           | -                               |
| GF0026740 | 1                            | 0                       | 0                           | 0 MuDR family transposase containing protein (1)            |                                                                                                                                                                                                                                                                                                                                                   | MULE transposase domain [IPR018289] (1); Transposase, MuDR, plant [IPR004332] (1)                                                                                                                                                                                                                                                       | scaffold_1_mRNA_691.1           | -                           | -                               |
| GF0026739 | 1                            | 0                       | 0                           | 0 Hypothetical protein (1)                                  |                                                                                                                                                                                                                                                                                                                                                   |                                                                                                                                                                                                                                                                                                                                         | scaffold_1_mRNA_682.1           | -                           | -                               |
| GF0026738 | 1                            | 0                       | 0                           | 0 Hypothetical protein (1)                                  | cysteine-type peptidase activity [GO:0008234 molecular_function] (1); proteolysis [GO:0006508 biological_process] (1)                                                                                                                                                                                                                             | Ulp1 protease family, C-terminal catalytic domain [IPR003653] (1); Domain of unknown function DUF1985 [IPR015410] (1)                                                                                                                                                                                                                   | scaffold_1_mRNA_675.1           | -                           | -                               |
| GF0026737 | 1                            | 0                       | 0                           | 0 Gibberellin 3 beta-hydroxylase family protein (1)         | oxidoreductase activity [GO:0016491 molecular_function] (1); oxidation-reduction process [GO:0055114 biological_process] (1)                                                                                                                                                                                                                      | Non-haem dioxygenase N-terminal domain [IPR026992] (1); Isopenicillin N synthase-like [IPR027443] (1); Oxo-glutarate/iron-dependent dioxygenase [IPR005123] (1)                                                                                                                                                                         | scaffold_1_mRNA_672.1           | -                           | -                               |
| GF0026736 | 1                            | 0                       | 0                           | 0 Hypothetical protein (1)                                  |                                                                                                                                                                                                                                                                                                                                                   | Protein of unknown function DUF2921 [IPR021319] (1)                                                                                                                                                                                                                                                                                     | scaffold_1_mRNA_667.1           | -                           | -                               |
| GF0026735 | 1                            | 0                       | 0                           | 0 Hypothetical protein (1)                                  |                                                                                                                                                                                                                                                                                                                                                   |                                                                                                                                                                                                                                                                                                                                         | scaffold_1_mRNA_661.1           | -                           | -                               |
| GF0026734 | 1                            | 0                       | 0                           | 0 Hypothetical protein (1)                                  | nucleic acid binding [GO:0003676 molecular_function] (1); DNA binding [GO:0003677 molecular_function] (1)                                                                                                                                                                                                                                         | Zinc finger, BED-type [IPR003656] (1); Zinc finger C2H2-type [IPR013087] (1)                                                                                                                                                                                                                                                            | scaffold_1_mRNA_659.1           | -                           | -                               |
| GF0026733 | 1                            | 0                       | 0                           | 0 Hypothetical protein (1)                                  |                                                                                                                                                                                                                                                                                                                                                   |                                                                                                                                                                                                                                                                                                                                         | scaffold_1_mRNA_658.1           | -                           | -                               |
| GF0026732 | 1                            | 0                       | 0                           | 0 Hypothetical protein (1)                                  |                                                                                                                                                                                                                                                                                                                                                   | Pentatricopeptide repeat [IPR002885] (1)                                                                                                                                                                                                                                                                                                | scaffold_1_mRNA_654.1           | -                           | -                               |
| GF0026731 | 1                            | 0                       | 0                           | 0 Hypothetical protein (1)                                  | membrane [GO:0016020 cellular_component] (1); metabolic process [GO:0008152 biological_process] (1); catalytic activity [GO:0003624 molecular_function] (1); fatty acid biosynthetic process [GO:0006633 biological_process] (1); transferase activity, transferring acyl groups other than amino-acyl groups [GO:0016747 molecular_function] (1) | Thiolase-like [IPR016039] (1); SOUL haem-binding protein [IPR006917] (1); Protein of unknown function DUF2558 [IPR018790] (1); Very-long-chain 3-ketoacyl-CoA synthase [IPR012392] (1); FAE1/Type III polyketide synthase-like protein [IPR013601] (1); 3-Oxoacyl-[acyl-carrier-protein (ACP)] synthase III, C-terminal [IPR013747] (1) | scaffold_1_mRNA_653.1           | -                           | -                               |
| GF0026730 | 1                            | 0                       | 0                           | 0 Hypothetical protein (1)                                  |                                                                                                                                                                                                                                                                                                                                                   |                                                                                                                                                                                                                                                                                                                                         | scaffold_1_mRNA_647.1           | -                           | -                               |
| GF0026729 | 1                            | 0                       | 0                           | 0 Hypothetical protein (1)                                  | zinc ion binding [GO:0008270 molecular_function] (1)                                                                                                                                                                                                                                                                                              | Zinc finger, GRF-type [IPR010666] (1)                                                                                                                                                                                                                                                                                                   | scaffold_1_mRNA_645.1           | -                           | -                               |
| GF0026728 | 1                            | 0                       | 0                           | 0 DUF761 domain protein (1)                                 |                                                                                                                                                                                                                                                                                                                                                   | Protein of unknown function DUF761, plant [IPR008480] (1)                                                                                                                                                                                                                                                                               | scaffold_1_mRNA_643.1           | -                           | -                               |
| GF0026727 | 1                            | 0                       | 0                           | 0 Hypothetical protein (1)                                  | translation [GO:0006412 biological_process] (1); intracellular [GO:0005622 cellular_component] (1); structural constituent of ribosome [GO:0003735 molecular_function] (1); ribosome [GO:0005840 cellular_component] (1)                                                                                                                          | Ribosomal protein L36 [IPR000473] (1)                                                                                                                                                                                                                                                                                                   | scaffold_1_mRNA_582.1           | -                           | -                               |
| GF0026726 | 1                            | 0                       | 0                           | 0 Hypothetical protein (1)                                  | nucleic acid binding [GO:0003676 molecular_function] (1)                                                                                                                                                                                                                                                                                          | Domain of unknown function DUF4283 [IPR025588] (1); Ribonuclease H-like domain [IPR012337] (1)                                                                                                                                                                                                                                          | scaffold_1_mRNA_571.1           | -                           | -                               |
| GF0026725 | 1                            | 0                       | 0                           | 0 COP9 signalosome complex subunit 5b (1)                   | protein binding [GO:0005515 molecular_function] (1)                                                                                                                                                                                                                                                                                               | JAB1/MPN/NOV34 metalloenzyme domain [IPR000555] (1)                                                                                                                                                                                                                                                                                     | scaffold_1_mRNA_55.3            | -                           | -                               |
| GF0026724 | 1                            | 0                       | 0                           | 0 Hypothetical protein (1)                                  | carbohydrate binding [GO:0030246 molecular_function] (1)                                                                                                                                                                                                                                                                                          | Legume lectin domain [IPR001200] (1); Concavalin A-like lectin/glucanase domain [IPR013320] (1)                                                                                                                                                                                                                                         | scaffold_1_mRNA_515.1           | -                           | -                               |
| GF0026723 | 1                            | 0                       | 0                           | 0 Hypothetical protein (1)                                  |                                                                                                                                                                                                                                                                                                                                                   |                                                                                                                                                                                                                                                                                                                                         | scaffold_1_mRNA_510.1           | -                           | -                               |
| GF0026722 | 1                            | 0                       | 0                           | 0 Hypothetical protein (1)                                  |                                                                                                                                                                                                                                                                                                                                                   |                                                                                                                                                                                                                                                                                                                                         | scaffold_1_mRNA_509.1           | -                           | -                               |
| GF0026721 | 1                            | 0                       | 0                           | 0 Hypothetical protein (1)                                  |                                                                                                                                                                                                                                                                                                                                                   |                                                                                                                                                                                                                                                                                                                                         | scaffold_1_mRNA_508.1           | -                           | -                               |
| GF0026720 | 1                            | 0                       | 0                           | 0 Green ripe-like 1 (1)                                     |                                                                                                                                                                                                                                                                                                                                                   | Protein of unknown function DUF778 [IPR008496] (1)                                                                                                                                                                                                                                                                                      | scaffold_1_mRNA_504.1           | -                           | -                               |
| GF0026719 | 1                            | 0                       | 0                           | 0 Ribonuclease H-like superfamily protein (1)               | nucleic acid binding [GO:0003676 molecular_function] (1)                                                                                                                                                                                                                                                                                          | Reverse transcriptase zinc-binding domain [IPR029660] (1); Ribonuclease H-like domain [IPR012337] (1)                                                                                                                                                                                                                                   | scaffold_1_mRNA_501.1           | -                           | -                               |
| GF0026718 | 1                            | 0                       | 0                           | 0 Hypothetical protein (1)                                  |                                                                                                                                                                                                                                                                                                                                                   |                                                                                                                                                                                                                                                                                                                                         | scaffold_1_mRNA_482.1           | -                           | -                               |
| GF0026717 | 1                            | 0                       | 0                           | 0 Hypothetical protein (1)                                  | nucleic acid binding [GO:0003676 molecular_function] (1)                                                                                                                                                                                                                                                                                          | Ribonuclease H-like domain [IPR012337] (1)                                                                                                                                                                                                                                                                                              | scaffold_1_mRNA_475.1           | -                           | -                               |
| GF0026716 | 1                            | 0                       | 0                           | 0 Derlin-1.1 isoform 1 (1)                                  | integral component of membrane [GO:0016021 cellular_component] (1); serine-type endopeptidase activity [GO:0004252 molecular_function] (1)                                                                                                                                                                                                        | Derlin [IPR007599] (1); Peptidase S54, rhomboid domain [IPR022764] (1)                                                                                                                                                                                                                                                                  | scaffold_1_mRNA_460.1           | -                           | -                               |
| GF0026715 | 1                            | 0                       | 0                           | 0 Hypothetical protein (1)                                  |                                                                                                                                                                                                                                                                                                                                                   |                                                                                                                                                                                                                                                                                                                                         | scaffold_1_mRNA_414.1           | -                           | -                               |
| GF0026714 | 1                            | 0                       | 0                           | 0 E3 ubiquitin-protein ligase ATL42 (1)                     | zinc ion binding [GO:0008270 molecular_function] (1); protein binding [GO:0005515 molecular_function] (1)                                                                                                                                                                                                                                         | Zinc finger, RINGFYVE/PHD-type [IPR013083] (1); Zinc finger, RING-type [IPR001841] (1)                                                                                                                                                                                                                                                  | scaffold_1_mRNA_409.1           | -                           | -                               |
| GF0026713 | 1                            | 0                       | 0                           | 0 Hypothetical protein (1)                                  | protein binding [GO:0005515 molecular_function] (1)                                                                                                                                                                                                                                                                                               | Ankyrin repeat-containing protein AC2p1680 [IPR027002] (1); Ankyrin repeat-containing domain [IPR020683] (1); Ankyrin repeat [IPR002110] (1)                                                                                                                                                                                            | scaffold_1_mRNA_406.1           | -                           | -                               |

| ID        | Num. in <i>C. caryophyllata</i> | Num. in <i>C. uchiha</i> | Num. in <i>P. trifoliata</i> | Note                                                                | GO                                                                                                                                                                                                                                                                                                                                                                                                                                                                                     | InterPro                                                                                                                                                                                                                                                                                                                                                               | Members in <i>C. caryophyllata</i> | Members in <i>C. uchiha</i> | Members in <i>P. trifoliata</i> |
|-----------|---------------------------------|--------------------------|------------------------------|---------------------------------------------------------------------|----------------------------------------------------------------------------------------------------------------------------------------------------------------------------------------------------------------------------------------------------------------------------------------------------------------------------------------------------------------------------------------------------------------------------------------------------------------------------------------|------------------------------------------------------------------------------------------------------------------------------------------------------------------------------------------------------------------------------------------------------------------------------------------------------------------------------------------------------------------------|------------------------------------|-----------------------------|---------------------------------|
| GF0026712 | 1                               | 0                        | 0                            | 0 Hypothetical protein (1)                                          | ATP binding [GO:0005524 molecular_function] (1); protein kinase activity [GO:0004672 molecular_function] (1); protein phosphorylation [GO:0006468 biological_process] (1)                                                                                                                                                                                                                                                                                                              | Protein kinase, ATP binding site [IPRO1744] (1); Serine/threonine-protein kinase, active site [IPRO0271] (1); Domain of unknown function DUF828 [IPRO08546] (1); Pleckstrin-like, plant [IPRO13666] (1); PH domain-like [IPRO1199] (1); Pleckstrin homology domain [IPRO01849] (1); Protein kinase domain [IPRO00719] (1); Protein kinase-like domain [IPRO011009] (1) | scaffold_1_mRNA_400.1              | -                           | -                               |
| GF0026711 | 1                               | 0                        | 0                            | 0 Peptide/nitrate transporter plant (1)                             | transport [GO:0006810 biological_process] (1); membrane [GO:0016020 cellular_component] (1); transporter activity [GO:0005215 molecular_function] (1)                                                                                                                                                                                                                                                                                                                                  | Major facilitator superfamily domain [IPRO20846] (1); Proton-dependent oligopeptide transporter family [IPRO00109] (1)                                                                                                                                                                                                                                                 | scaffold_1_mRNA_398.1              | -                           | -                               |
| GF0026710 | 1                               | 0                        | 0                            | 0 ARM repeat superfamily protein, putative (1)                      |                                                                                                                                                                                                                                                                                                                                                                                                                                                                                        | Armado-like helical [IPRO11989] (1)                                                                                                                                                                                                                                                                                                                                    | scaffold_1_mRNA_392.1              | -                           | -                               |
| GF0026709 | 1                               | 0                        | 0                            | 0 Hemopexin (1)                                                     |                                                                                                                                                                                                                                                                                                                                                                                                                                                                                        | Endonuclease/exonuclease/phosphatase [IPRO05135] (1)                                                                                                                                                                                                                                                                                                                   | scaffold_1_mRNA_372.1              | -                           | -                               |
| GF0026708 | 1                               | 0                        | 0                            | 0 Hypothetical protein (1)                                          |                                                                                                                                                                                                                                                                                                                                                                                                                                                                                        |                                                                                                                                                                                                                                                                                                                                                                        | scaffold_1_mRNA_3597.1             | -                           | -                               |
| GF0026707 | 1                               | 0                        | 0                            | 0 Hypothetical protein (1)                                          | carbohydrate metabolic process [GO:0005975 biological_process] (1)                                                                                                                                                                                                                                                                                                                                                                                                                     | Glycoside hydrolase superfamily [IPRO17853] (1); Glycoside hydrolase family 18, catalytic domain [IPRO01223] (1)                                                                                                                                                                                                                                                       | scaffold_1_mRNA_3565.1             | -                           | -                               |
| GF0026706 | 1                               | 0                        | 0                            | 0 Hypothetical protein (1)                                          |                                                                                                                                                                                                                                                                                                                                                                                                                                                                                        |                                                                                                                                                                                                                                                                                                                                                                        | scaffold_1_mRNA_3548.1             | -                           | -                               |
| GF0026705 | 1                               | 0                        | 0                            | 0 Hypothetical protein (1)                                          |                                                                                                                                                                                                                                                                                                                                                                                                                                                                                        |                                                                                                                                                                                                                                                                                                                                                                        | scaffold_1_mRNA_3547.1             | -                           | -                               |
| GF0026704 | 1                               | 0                        | 0                            | 0 Hypothetical protein (1)                                          | protein binding [GO:0005515 molecular_function] (1); zinc ion binding [GO:0008270 molecular_function] (1)                                                                                                                                                                                                                                                                                                                                                                              | Zinc finger, RINGFYVE/PHD-type [IPRO13083] (1); Zinc finger, RING-type [IPRO01841] (1)                                                                                                                                                                                                                                                                                 | scaffold_1_mRNA_3533.1             | -                           | -                               |
| GF0026703 | 1                               | 0                        | 0                            | 0 Tetratricopeptide repeat (TPR)-like superfamily protein (1)       | zinc ion binding [GO:0008270 molecular_function] (1); protein binding [GO:0005515 molecular_function] (1)                                                                                                                                                                                                                                                                                                                                                                              | DYW domain [IPRO232867] (1); Tetratricopeptide-like helical domain [IPRO11990] (1); Tetratricopeptide repeat [IPRO02885] (1)                                                                                                                                                                                                                                           | scaffold_1_mRNA_349.1              | -                           | -                               |
| GF0026702 | 1                               | 0                        | 0                            | 0 Hypothetical protein (1)                                          |                                                                                                                                                                                                                                                                                                                                                                                                                                                                                        |                                                                                                                                                                                                                                                                                                                                                                        | scaffold_1_mRNA_3478.1             | -                           | -                               |
| GF0026701 | 1                               | 0                        | 0                            | 0 Hypothetical protein (1)                                          |                                                                                                                                                                                                                                                                                                                                                                                                                                                                                        |                                                                                                                                                                                                                                                                                                                                                                        | scaffold_1_mRNA_3468.1             | -                           | -                               |
| GF0026700 | 1                               | 0                        | 0                            | 0 Hypothetical protein (1)                                          | membrane [GO:0016020 cellular_component] (1); transmembrane transporter activity [GO:0022857 molecular_function] (1); integral component of membrane [GO:0016021 cellular_component] (1)                                                                                                                                                                                                                                                                                               | EamA domain [IPRO00620] (1); WAT1-related protein [IPRO03184] (1)                                                                                                                                                                                                                                                                                                      | scaffold_1_mRNA_3444.1             | -                           | -                               |
| GF0026699 | 1                               | 0                        | 0                            | 0 Hypothetical protein (1)                                          |                                                                                                                                                                                                                                                                                                                                                                                                                                                                                        |                                                                                                                                                                                                                                                                                                                                                                        | scaffold_1_mRNA_3430.1             | -                           | -                               |
| GF0026698 | 1                               | 0                        | 0                            | 0 Hypothetical protein (1)                                          |                                                                                                                                                                                                                                                                                                                                                                                                                                                                                        |                                                                                                                                                                                                                                                                                                                                                                        | scaffold_1_mRNA_3420.1             | -                           | -                               |
| GF0026697 | 1                               | 0                        | 0                            | 0 Hypothetical protein (1)                                          |                                                                                                                                                                                                                                                                                                                                                                                                                                                                                        | Periplasmic binding protein-like I [IPRO28082] (1); Receptor, ligand binding region [IPRO01828] (1)                                                                                                                                                                                                                                                                    | scaffold_1_mRNA_3414.1             | -                           | -                               |
| GF0026696 | 1                               | 0                        | 0                            | 0 Hypothetical protein (1)                                          | nucleic acid binding [GO:0003476 molecular_function] (1)                                                                                                                                                                                                                                                                                                                                                                                                                               | Ribonuclease H-like domain [IPRO12337] (1)                                                                                                                                                                                                                                                                                                                             | scaffold_1_mRNA_3408.1             | -                           | -                               |
| GF0026695 | 1                               | 0                        | 0                            | 0 Hypothetical protein (1)                                          | terpenoid biosynthetic process [GO:0016114 biological_process] (1); 1-deoxy-D-xylulose-5-phosphate synthase activity [GO:0008861 molecular_function] (1)                                                                                                                                                                                                                                                                                                                               | Transketolase-like, pyrimidine-binding domain [IPRO05475] (1); Transketolase binding site [IPRO20826] (1); Dxyxylulose-5-phosphate synthase [IPRO05477] (1); Thiamin diphosphate-binding fold [IPRO29061] (1)                                                                                                                                                          | scaffold_1_mRNA_3402.1             | -                           | -                               |
| GF0026694 | 1                               | 0                        | 0                            | 0 ADP-ribosylation factor 2 (1)                                     | small GTPase mediated signal transduction [GO:0007264 biological_process] (1); intracellular [GO:0005622 cellular_component] (1); GTP binding [GO:0005525 molecular_function] (1)                                                                                                                                                                                                                                                                                                      | Small GTP-binding protein domain [IPRO05255] (1); P-loop containing nucleoside triphosphate hydrolase [IPRO27417] (1); Small GTPase superfamily, ARF type [IPRO24156] (1); Small GTPase superfamily, ARF/SAR type [IPRO06689] (1)                                                                                                                                      | scaffold_1_mRNA_3401.1             | -                           | -                               |
| GF0026693 | 1                               | 0                        | 0                            | 0 Hypothetical protein (1)                                          | xyloglucan:xyloglucosyl transferase activity [GO:0016762 molecular_function] (1); hydrolase activity, hydrolyzing O-glycosyl compounds [GO:0004553 molecular_function] (1); cell wall [GO:0005618 cellular_component] (1); carbohydrate metabolic process [GO:0005975 biological_process] (1); apoplast [GO:0048046 cellular_component] (1); cellular glucan metabolic process [GO:0006073 biological_process] (1)                                                                     | Xyloglucan endo-transglycosylase, C-terminal [IPRO10713] (1); Beta-glucanase [IPRO08264] (1); Glycoside hydrolase family 16 [IPRO00757] (1); Concanavalin A-like lectin/glucanase domain [IPRO13320] (1); Glycoside hydrolase, family 16, active site [IPRO08263] (1)                                                                                                  | scaffold_1_mRNA_3381.1             | -                           | -                               |
| GF0026692 | 1                               | 0                        | 0                            | 0 Probable xyloglucan endotransglycosylase/hydrolase protein 23 (1) | xyloglucan:xyloglucosyl transferase activity [GO:0016762 molecular_function] (1); hydrolase activity, hydrolyzing O-glycosyl compounds [GO:0004553 molecular_function] (1); cell wall [GO:0005618 cellular_component] (1); carbohydrate metabolic process [GO:0005975 biological_process] (1); apoplast [GO:0048046 cellular_component] (1); cellular glucan metabolic process [GO:0006073 biological_process] (1)                                                                     | Xyloglucan endo-transglycosylase, C-terminal [IPRO10713] (1); Glycoside hydrolase family 16 [IPRO00757] (1); Concanavalin A-like lectin/glucanase domain [IPRO13320] (1)                                                                                                                                                                                               | scaffold_1_mRNA_3378.1             | -                           | -                               |
| GF0026691 | 1                               | 0                        | 0                            | 0 Hypothetical protein (1)                                          |                                                                                                                                                                                                                                                                                                                                                                                                                                                                                        |                                                                                                                                                                                                                                                                                                                                                                        | scaffold_1_mRNA_3369.1             | -                           | -                               |
| GF0026690 | 1                               | 0                        | 0                            | 0 Syntaxin's-SNARE family protein, putative isoform 1 (1)           | membrane [GO:0016020 cellular_component] (1); vesicle-mediated transport [GO:0016192 biological_process] (1); Golgi vesicle transport [GO:0048195 biological_process] (1)                                                                                                                                                                                                                                                                                                              | SNARE [IPRO10989] (1); Syntaxin 6, N-terminal [IPRO15260] (1)                                                                                                                                                                                                                                                                                                          | scaffold_1_mRNA_3358.1             | -                           | -                               |
| GF0026689 | 1                               | 0                        | 0                            | 0 Hypothetical protein (1)                                          |                                                                                                                                                                                                                                                                                                                                                                                                                                                                                        |                                                                                                                                                                                                                                                                                                                                                                        | scaffold_1_mRNA_3356.1             | -                           | -                               |
| GF0026688 | 1                               | 0                        | 0                            | 0 Hypothetical protein (1)                                          | nucleic acid binding [GO:0003476 molecular_function] (1)                                                                                                                                                                                                                                                                                                                                                                                                                               | Ribonuclease H-like domain [IPRO12337] (1)                                                                                                                                                                                                                                                                                                                             | scaffold_1_mRNA_3330.1             | -                           | -                               |
| GF0026687 | 1                               | 0                        | 0                            | 0 Hypothetical protein (1)                                          |                                                                                                                                                                                                                                                                                                                                                                                                                                                                                        |                                                                                                                                                                                                                                                                                                                                                                        | scaffold_1_mRNA_3317.1             | -                           | -                               |
| GF0026686 | 1                               | 0                        | 0                            | 0 Hypothetical protein (1)                                          |                                                                                                                                                                                                                                                                                                                                                                                                                                                                                        | LOG family [IPRO31100] (1)                                                                                                                                                                                                                                                                                                                                             | scaffold_1_mRNA_331.1              | -                           | -                               |
| GF0026685 | 1                               | 0                        | 0                            | 0 Hypothetical protein (1)                                          | regulation of transcription, DNA-templated [GO:0006355 biological_process] (1)                                                                                                                                                                                                                                                                                                                                                                                                         | FAR1 DNA binding domain [IPRO04330] (1); FHY3/FAR1 family [IPRO31052] (1)                                                                                                                                                                                                                                                                                              | scaffold_1_mRNA_3299.1             | -                           | -                               |
| GF0026684 | 1                               | 0                        | 0                            | 0 Hypothetical protein (1)                                          |                                                                                                                                                                                                                                                                                                                                                                                                                                                                                        |                                                                                                                                                                                                                                                                                                                                                                        | scaffold_1_mRNA_3270.1             | -                           | -                               |
| GF0026683 | 1                               | 0                        | 0                            | 0 Neuronal acetylcholine receptor subunit alpha-5 (1)               |                                                                                                                                                                                                                                                                                                                                                                                                                                                                                        |                                                                                                                                                                                                                                                                                                                                                                        | scaffold_1_mRNA_3243.1             | -                           | -                               |
| GF0026682 | 1                               | 0                        | 0                            | 0 Squalene monooxygenase isoform 3 (1)                              | squalene monooxygenase activity [GO:0004506 molecular_function] (1); integral component of membrane [GO:0016021 cellular_component] (1); oxidation-reduction process [GO:005114 biological_process] (1); oxidoreductase activity [GO:0016491 molecular_function] (1); flavin adenine dinucleotide binding [GO:0050660 molecular_function] (1)                                                                                                                                          | Squalene epoxidase [IPRO13698] (1); FAD/NAD(P) <sup>+</sup> -binding domain [IPRO23753] (1)                                                                                                                                                                                                                                                                            | scaffold_1_mRNA_3224.1             | -                           | -                               |
| GF0026681 | 1                               | 0                        | 0                            | 0 Hypothetical protein (1)                                          | oxidation-reduction process [GO:005114 biological_process] (1); oxidoreductase activity [GO:0016491 molecular_function] (1); flavin adenine dinucleotide binding [GO:0050660 molecular_function] (1)                                                                                                                                                                                                                                                                                   | Reverse transcriptase, RNA-dependent DNA polymerase [IPRO13103] (1)                                                                                                                                                                                                                                                                                                    | scaffold_1_mRNA_3223.1             | -                           | -                               |
| GF0026680 | 1                               | 0                        | 0                            | 0 Squalene monooxygenase (1)                                        | squalene monooxygenase activity [GO:0004506 molecular_function] (1); integral component of membrane [GO:0016021 cellular_component] (1); oxidation-reduction process [GO:005114 biological_process] (1); oxidoreductase activity [GO:0016491 molecular_function] (1); flavin adenine dinucleotide binding [GO:0050660 molecular_function] (1); squalene monooxygenase activity [GO:0004506 molecular_function] (1); integral component of membrane [GO:0016021 cellular_component] (1) | FAD/NAD(P) <sup>+</sup> -binding domain [IPRO23753] (1); Squalene epoxidase [IPRO13698] (1)                                                                                                                                                                                                                                                                            | scaffold_1_mRNA_3221.1             | -                           | -                               |
| GF0026679 | 1                               | 0                        | 0                            | 0 Hypothetical protein (1)                                          | nucleic acid binding [GO:0003476 molecular_function] (1)                                                                                                                                                                                                                                                                                                                                                                                                                               | Ribonuclease H-like domain [IPRO12337] (1)                                                                                                                                                                                                                                                                                                                             | scaffold_1_mRNA_319.1              | -                           | -                               |
| GF0026678 | 1                               | 0                        | 0                            | 0 Hypothetical protein (1)                                          |                                                                                                                                                                                                                                                                                                                                                                                                                                                                                        | Retroransposon gag domain [IPRO05162] (1)                                                                                                                                                                                                                                                                                                                              | scaffold_1_mRNA_3181.1             | -                           | -                               |
| GF0026677 | 1                               | 0                        | 0                            | 0 Hypothetical protein (1)                                          |                                                                                                                                                                                                                                                                                                                                                                                                                                                                                        |                                                                                                                                                                                                                                                                                                                                                                        | scaffold_1_mRNA_3179.1             | -                           | -                               |
| GF0026676 | 1                               | 0                        | 0                            | 0 Vesicle-associated membrane protein 71 (1)                        | vesicle-mediated transport [GO:0016192 biological_process] (1); integral component of membrane [GO:0016021 cellular_component] (1); transport [GO:0006810 biological_process] (1)                                                                                                                                                                                                                                                                                                      | Longin domain [IPRO10908] (1); Longin-like domain [IPRO11012] (1); Synaptobrevin [IPRO01388] (1)                                                                                                                                                                                                                                                                       | scaffold_1_mRNA_3156.1             | -                           | -                               |
| GF0026675 | 1                               | 0                        | 0                            | 0 Copia-like retroelement pol polyprotein (1)                       |                                                                                                                                                                                                                                                                                                                                                                                                                                                                                        | Reverse transcriptase, RNA-dependent DNA polymerase [IPRO13103] (1)                                                                                                                                                                                                                                                                                                    | scaffold_1_mRNA_315.1              | -                           | -                               |
| GF0026674 | 1                               | 0                        | 0                            | 0 Hypothetical protein (1)                                          |                                                                                                                                                                                                                                                                                                                                                                                                                                                                                        |                                                                                                                                                                                                                                                                                                                                                                        | scaffold_1_mRNA_3140.1             | -                           | -                               |
| GF0026673 | 1                               | 0                        | 0                            | 0 Hypothetical protein (1)                                          |                                                                                                                                                                                                                                                                                                                                                                                                                                                                                        |                                                                                                                                                                                                                                                                                                                                                                        | scaffold_1_mRNA_314.1              | -                           | -                               |
| GF0026672 | 1                               | 0                        | 0                            | 0 Hypothetical protein (1)                                          |                                                                                                                                                                                                                                                                                                                                                                                                                                                                                        |                                                                                                                                                                                                                                                                                                                                                                        | scaffold_1_mRNA_3132.1             | -                           | -                               |
| GF0026671 | 1                               | 0                        | 0                            | 0 Hypothetical protein (1)                                          |                                                                                                                                                                                                                                                                                                                                                                                                                                                                                        |                                                                                                                                                                                                                                                                                                                                                                        | scaffold_1_mRNA_313.1              | -                           | -                               |
| GF0026670 | 1                               | 0                        | 0                            | 0 Hypothetical protein (1)                                          |                                                                                                                                                                                                                                                                                                                                                                                                                                                                                        |                                                                                                                                                                                                                                                                                                                                                                        | scaffold_1_mRNA_3123.1             | -                           | -                               |
| GF0026669 | 1                               | 0                        | 0                            | 0 Hypothetical protein (1)                                          |                                                                                                                                                                                                                                                                                                                                                                                                                                                                                        |                                                                                                                                                                                                                                                                                                                                                                        | scaffold_1_mRNA_3121.1             | -                           | -                               |
| GF0026668 | 1                               | 0                        | 0                            | 0 Hypothetical protein (1)                                          |                                                                                                                                                                                                                                                                                                                                                                                                                                                                                        |                                                                                                                                                                                                                                                                                                                                                                        | scaffold_1_mRNA_312.1              | -                           | -                               |

| ID        | Num. in <i>C. clementiae</i> | Num. in <i>C. uchiha</i> | Num. in <i>P. trifoliata</i> | Note                                                           | GO                                                                                                                                                                                                                                                                                                                 | InterPro                                                                                                                                                                                                                                                                                      | Members in <i>C. clementiae</i> | Members in <i>C. uchiha</i> | Members in <i>P. trifoliata</i> |
|-----------|------------------------------|--------------------------|------------------------------|----------------------------------------------------------------|--------------------------------------------------------------------------------------------------------------------------------------------------------------------------------------------------------------------------------------------------------------------------------------------------------------------|-----------------------------------------------------------------------------------------------------------------------------------------------------------------------------------------------------------------------------------------------------------------------------------------------|---------------------------------|-----------------------------|---------------------------------|
| GF0026667 | 1                            | 0                        | 0                            | 0 Hypothetical protein (1)                                     |                                                                                                                                                                                                                                                                                                                    | Protein-like domain [IPR008502] (1)                                                                                                                                                                                                                                                           | scaffold_1_mRNA_3119.1          | -                           | -                               |
| GF0026666 | 1                            | 0                        | 0                            | 0 Cytokinin riboside 5'-monophosphate phosphoribohydrolase (1) |                                                                                                                                                                                                                                                                                                                    | LOG family [IPR031100] (1)                                                                                                                                                                                                                                                                    | scaffold_1_mRNA_3118.1          | -                           | -                               |
| GF0026665 | 1                            | 0                        | 0                            | 0 Hypothetical protein (1)                                     |                                                                                                                                                                                                                                                                                                                    |                                                                                                                                                                                                                                                                                               | scaffold_1_mRNA_3117.1          | -                           | -                               |
| GF0026664 | 1                            | 0                        | 0                            | 0 Hypothetical protein (1)                                     |                                                                                                                                                                                                                                                                                                                    |                                                                                                                                                                                                                                                                                               | scaffold_1_mRNA_3116.1          | -                           | -                               |
| GF0026663 | 1                            | 0                        | 0                            | 0 Hypothetical protein (1)                                     | protein binding [GO:0005515 molecular_function] (1)                                                                                                                                                                                                                                                                | Ankyrin repeat [IPR002110] (1); Ankyrin repeat-containing domain [IPR020683] (1)                                                                                                                                                                                                              | scaffold_1_mRNA_3111.1          | -                           | -                               |
| GF0026662 | 1                            | 0                        | 0                            | 0 Cytokinin riboside 5'-monophosphate phosphoribohydrolase (1) |                                                                                                                                                                                                                                                                                                                    | LOG family [IPR031100] (1)                                                                                                                                                                                                                                                                    | scaffold_1_mRNA_3111.1          | -                           | -                               |
| GF0026661 | 1                            | 0                        | 0                            | 0 Ankyrin repeat family protein (1)                            | protein binding [GO:0005515 molecular_function] (1)                                                                                                                                                                                                                                                                | Ankyrin repeat [IPR002110] (1); Ankyrin repeat-containing domain [IPR020683] (1)                                                                                                                                                                                                              | scaffold_1_mRNA_3107.1          | -                           | -                               |
| GF0026660 | 1                            | 0                        | 0                            | 0 Hypothetical protein (1)                                     |                                                                                                                                                                                                                                                                                                                    |                                                                                                                                                                                                                                                                                               | scaffold_1_mRNA_3102.1          | -                           | -                               |
| GF0026659 | 1                            | 0                        | 0                            | 0 Hypothetical protein (1)                                     |                                                                                                                                                                                                                                                                                                                    |                                                                                                                                                                                                                                                                                               | scaffold_1_mRNA_3101.1          | -                           | -                               |
| GF0026658 | 1                            | 0                        | 0                            | 0 Hypothetical protein (1)                                     |                                                                                                                                                                                                                                                                                                                    | Reverse transcriptase zinc-binding domain [IPR026960] (1)                                                                                                                                                                                                                                     | scaffold_1_mRNA_3081.1          | -                           | -                               |
| GF0026657 | 1                            | 0                        | 0                            | 0 Hypothetical protein (1)                                     |                                                                                                                                                                                                                                                                                                                    |                                                                                                                                                                                                                                                                                               | scaffold_1_mRNA_3074.1          | -                           | -                               |
| GF0026656 | 1                            | 0                        | 0                            | 0 Hypothetical protein (1)                                     |                                                                                                                                                                                                                                                                                                                    |                                                                                                                                                                                                                                                                                               | scaffold_1_mRNA_3073.1          | -                           | -                               |
| GF0026655 | 1                            | 0                        | 0                            | 0 Cytokinin riboside 5'-monophosphate phosphoribohydrolase (1) |                                                                                                                                                                                                                                                                                                                    | LOG family [IPR031100] (1)                                                                                                                                                                                                                                                                    | scaffold_1_mRNA_3072.1          | -                           | -                               |
| GF0026654 | 1                            | 0                        | 0                            | 0 Hypothetical protein (1)                                     |                                                                                                                                                                                                                                                                                                                    |                                                                                                                                                                                                                                                                                               | scaffold_1_mRNA_3053.1          | -                           | -                               |
| GF0026653 | 1                            | 0                        | 0                            | 0 F-box domain containing protein, expressed (1)               | protein binding [GO:0005515 molecular_function] (1)                                                                                                                                                                                                                                                                | F-box domain [IPR001810] (1); Leucine-rich repeat domain, L domain-like [IPR026757] (1); FBD domain [IPR006566] (1)                                                                                                                                                                           | scaffold_1_mRNA_3039.1          | -                           | -                               |
| GF0026652 | 1                            | 0                        | 0                            | 0 Hypothetical protein (1)                                     |                                                                                                                                                                                                                                                                                                                    |                                                                                                                                                                                                                                                                                               | scaffold_1_mRNA_3030.1          | -                           | -                               |
| GF0026651 | 1                            | 0                        | 0                            | 0 Hypothetical protein (1)                                     | pectinesterase activity [GO:0030599 molecular_function] (1); cell wall modification [GO:0042545 biological_process] (1); cell wall [GO:0005618 cellular_component] (1)                                                                                                                                             | Pectinesterase, Asp active site [IPR033131] (1); Pectin lyase fold [IPR012334] (1); Pectinesterase, catalytic [IPR000070] (1); Pectin lyase fold/virulence factor [IPR011050] (1)                                                                                                             | scaffold_1_mRNA_3029.1          | -                           | -                               |
| GF0026650 | 1                            | 0                        | 0                            | 0 C2HC-type zinc finger RING/U-box protein (1)                 | protein binding [GO:0005515 molecular_function] (1); zinc ion binding [GO:0008270 molecular_function] (1); ubiquitin-protein transferase activity [GO:0004842 molecular_function] (1); protein ubiquitination [GO:0014567 biological_process] (1)                                                                  | Zinc finger, RING-FYVE/PHD-type [IPR013083] (1); RBR domain [IPR02867] (1); Zinc finger, RING-type [IPR001841] (1); Zinc finger, RING-type, conserved site [IPR017907] (1); E3 ubiquitin ligase RBR family [IPR031127] (1)                                                                    | scaffold_1_mRNA_3020.1          | -                           | -                               |
| GF0026649 | 1                            | 0                        | 0                            | 0 Auxin-induced protein 15A (1)                                | response to auxin [GO:0009733 biological_process] (1)                                                                                                                                                                                                                                                              | Small auxin-up RNA [IPR003676] (1)                                                                                                                                                                                                                                                            | scaffold_1_mRNA_3006.1          | -                           | -                               |
| GF0026648 | 1                            | 0                        | 0                            | 0 Hypothetical protein (1)                                     |                                                                                                                                                                                                                                                                                                                    |                                                                                                                                                                                                                                                                                               | scaffold_1_mRNA_3001.1          | -                           | -                               |
| GF0026647 | 1                            | 0                        | 0                            | 0 Salicylate 1-monoxygenase (1)                                | oxidoreductase activity [GO:0016491 molecular_function] (1); oxidation-reduction process [GO:0055114 biological_process] (1); FAD binding [GO:0071949 molecular_function] (1)                                                                                                                                      | FAD-binding domain [IPR002938] (1); FAD/NAD(P)-binding domain [IPR023753] (1)                                                                                                                                                                                                                 | scaffold_1_mRNA_2991.1          | -                           | -                               |
| GF0026646 | 1                            | 0                        | 0                            | 0 Adipocyte plasma membrane-associated protein (1)             | stricoid synthase activity [GO:0016844 molecular_function] (1); biosynthetic process [GO:0009058 biological_process] (1)                                                                                                                                                                                           | Six-bladed beta-propeller, Toll-like [IPR011042] (1); Stricoid synthase, conserved region [IPR018119] (1); Stricoid synthase [IPR004141] (1)                                                                                                                                                  | scaffold_1_mRNA_2972.1          | -                           | -                               |
| GF0026645 | 1                            | 0                        | 0                            | 0 Hypothetical protein (1)                                     |                                                                                                                                                                                                                                                                                                                    |                                                                                                                                                                                                                                                                                               | scaffold_1_mRNA_2946.1          | -                           | -                               |
| GF0026644 | 1                            | 0                        | 0                            | 0 Myb domain protein 4 (1)                                     |                                                                                                                                                                                                                                                                                                                    |                                                                                                                                                                                                                                                                                               | scaffold_1_mRNA_2928.1          | -                           | -                               |
| GF0026643 | 1                            | 0                        | 0                            | 0 Hypothetical protein (1)                                     | monolayer-surrounded lipid storage body [GO:0012511 cellular_component] (1); integral component of membrane [GO:0016021 cellular_component] (1)                                                                                                                                                                    | Oleosin [IPR000136] (1)                                                                                                                                                                                                                                                                       | scaffold_1_mRNA_2925.1          | -                           | -                               |
| GF0026642 | 1                            | 0                        | 0                            | 0 Subtilisin-like serine protease (1)                          | proteolysis [GO:0006508 biological_process] (1); serine-type endopeptidase activity [GO:0004252 molecular_function] (1)                                                                                                                                                                                            | Peptidase S8, subtilisin, Ser-active site [IPR023828] (1); Peptidase S8 propeptide/protease inhibitor I9 [IPR010259] (1); PA domain [IPR003137] (1); Peptidase S8/S53 domain [IPR000209] (1); Cucumis-like catalytic domain [IPR034197] (1); Peptidase S8, subtilisin-related [IPR015500] (1) | scaffold_1_mRNA_2915.1          | -                           | -                               |
| GF0026641 | 1                            | 0                        | 0                            | 0 Salicylate 1-monoxygenase (1)                                | oxidoreductase activity [GO:0016491 molecular_function] (1); oxidation-reduction process [GO:0055114 biological_process] (1); FAD binding [GO:0071949 molecular_function] (1)                                                                                                                                      | FAD/NAD(P)-binding domain [IPR023753] (1); FAD-binding domain [IPR002938] (1)                                                                                                                                                                                                                 | scaffold_1_mRNA_2911.1          | -                           | -                               |
| GF0026640 | 1                            | 0                        | 0                            | 0 Putative non-LTR reverse transcriptase (1)                   | nucleic acid binding [GO:0003676 molecular_function] (1)                                                                                                                                                                                                                                                           | Reverse transcriptase zinc-binding domain [IPR026960] (1); Ribonuclease H-like domain [IPR012337] (1)                                                                                                                                                                                         | scaffold_1_mRNA_2908.1          | -                           | -                               |
| GF0026639 | 1                            | 0                        | 0                            | 0 Hypothetical protein (1)                                     | zinc ion binding [GO:0008270 molecular_function] (1); nucleic acid binding [GO:0003676 molecular_function] (1)                                                                                                                                                                                                     | Reverse transcriptase domain [IPR004077] (1); Domain of unknown function DU243 [IPR025580] (1); Zinc finger, CCHC-type [IPR001878] (1); Domain of unknown function DUF2431 [IPR019446] (1); Endonuclease/cromolucase/phosphatase [IPR005135] (1)                                              | scaffold_1_mRNA_2902.1          | -                           | -                               |
| GF0026638 | 1                            | 0                        | 0                            | 0 Hypothetical protein (1)                                     |                                                                                                                                                                                                                                                                                                                    |                                                                                                                                                                                                                                                                                               | scaffold_1_mRNA_2899.1          | -                           | -                               |
| GF0026637 | 1                            | 0                        | 0                            | 0 Hypothetical protein (1)                                     |                                                                                                                                                                                                                                                                                                                    | Reverse transcriptase zinc-binding domain [IPR026960] (1)                                                                                                                                                                                                                                     | scaffold_1_mRNA_2898.1          | -                           | -                               |
| GF0026636 | 1                            | 0                        | 0                            | 0 Hypothetical protein (1)                                     | oxidoreductase activity [GO:0016491 molecular_function] (1); oxidation-reduction process [GO:0055114 biological_process] (1)                                                                                                                                                                                       | Isopenicillin N synthase-like [IPR027443] (1); Oxo-glutarate/iron-dependent dioxygenase [IPR005123] (1)                                                                                                                                                                                       | scaffold_1_mRNA_2897.1          | -                           | -                               |
| GF0026635 | 1                            | 0                        | 0                            | 0 Senescence-related gene 1 (1)                                | oxidoreductase activity [GO:0016491 molecular_function] (1); oxidation-reduction process [GO:0055114 biological_process] (1)                                                                                                                                                                                       | Oxo-glutarate/iron-dependent dioxygenase [IPR005123] (1); Isopenicillin N synthase-like [IPR027443] (1); Non-haem dioxygenase N-terminal domain [IPR026992] (1)                                                                                                                               | scaffold_1_mRNA_2895.1          | -                           | -                               |
| GF0026634 | 1                            | 0                        | 0                            | 0 Hypothetical protein (1)                                     |                                                                                                                                                                                                                                                                                                                    | Non-haem dioxygenase N-terminal domain [IPR026992] (1); Isopenicillin N synthase-like [IPR027443] (1)                                                                                                                                                                                         | scaffold_1_mRNA_2893.1          | -                           | -                               |
| GF0026633 | 1                            | 0                        | 0                            | 0 Hypothetical protein (1)                                     |                                                                                                                                                                                                                                                                                                                    |                                                                                                                                                                                                                                                                                               | scaffold_1_mRNA_2891.1          | -                           | -                               |
| GF0026632 | 1                            | 0                        | 0                            | 0 Hypothetical protein (1)                                     |                                                                                                                                                                                                                                                                                                                    |                                                                                                                                                                                                                                                                                               | scaffold_1_mRNA_2881.1          | -                           | -                               |
| GF0026631 | 1                            | 0                        | 0                            | 0 Cytokinin riboside 5'-monophosphate phosphoribohydrolase (1) |                                                                                                                                                                                                                                                                                                                    | LOG family [IPR031100] (1)                                                                                                                                                                                                                                                                    | scaffold_1_mRNA_2878.1          | -                           | -                               |
| GF0026630 | 1                            | 0                        | 0                            | 0 Hypothetical protein (1)                                     |                                                                                                                                                                                                                                                                                                                    |                                                                                                                                                                                                                                                                                               | scaffold_1_mRNA_2877.1          | -                           | -                               |
| GF0026629 | 1                            | 0                        | 0                            | 0 Hypothetical protein (1)                                     | proteolysis [GO:0006508 biological_process] (1); cysteine-type peptidase activity [GO:0008234 molecular_function] (1)                                                                                                                                                                                              | Ulp1 protease family, C-terminal catalytic domain [IPR003653] (1)                                                                                                                                                                                                                             | scaffold_1_mRNA_2875.1          | -                           | -                               |
| GF0026628 | 1                            | 0                        | 0                            | 0 Hypothetical protein (1)                                     | oxidation-reduction process [GO:0055114 biological_process] (1); oxidoreductase activity [GO:0016491 molecular_function] (1); FAD binding [GO:0071949 molecular_function] (1)                                                                                                                                      | FAD/NAD(P)-binding domain [IPR023753] (1); FAD-binding domain [IPR002938] (1)                                                                                                                                                                                                                 | scaffold_1_mRNA_2861.1          | -                           | -                               |
| GF0026627 | 1                            | 0                        | 0                            | 0 Hypothetical protein (1)                                     | regulation of transcription, DNA-templated [GO:0006355 biological_process] (1); nucleic acid binding [GO:0003676 molecular_function] (1)                                                                                                                                                                           | Carlyavirus nucleic acid-binding protein [IPR025688] (1)                                                                                                                                                                                                                                      | scaffold_1_mRNA_2848.1          | -                           | -                               |
| GF0026626 | 1                            | 0                        | 0                            | 0 Cytokinin riboside 5'-monophosphate phosphoribohydrolase (1) |                                                                                                                                                                                                                                                                                                                    | LOG family [IPR031100] (1)                                                                                                                                                                                                                                                                    | scaffold_1_mRNA_2847.1          | -                           | -                               |
| GF0026625 | 1                            | 0                        | 0                            | 0 Hypothetical protein (1)                                     |                                                                                                                                                                                                                                                                                                                    |                                                                                                                                                                                                                                                                                               | scaffold_1_mRNA_2841.1          | -                           | -                               |
| GF0026624 | 1                            | 0                        | 0                            | 0 Hypothetical protein (1)                                     |                                                                                                                                                                                                                                                                                                                    |                                                                                                                                                                                                                                                                                               | scaffold_1_mRNA_2841.1          | -                           | -                               |
| GF0026623 | 1                            | 0                        | 0                            | 0 Hypothetical protein (1)                                     |                                                                                                                                                                                                                                                                                                                    |                                                                                                                                                                                                                                                                                               | scaffold_1_mRNA_2826.1          | -                           | -                               |
| GF0026622 | 1                            | 0                        | 0                            | 0 Hypothetical protein (1)                                     |                                                                                                                                                                                                                                                                                                                    | Amh/Allergen [IPR018082] (1); Pectin lyase fold/virulence factor [IPR011050] (1); Pectin lyase fold [IPR012334] (1)                                                                                                                                                                           | scaffold_1_mRNA_2824.1          | -                           | -                               |
| GF0026621 | 1                            | 0                        | 0                            | 0 Hypothetical protein (1)                                     |                                                                                                                                                                                                                                                                                                                    | Potassium channel domain [IPR013099] (1)                                                                                                                                                                                                                                                      | scaffold_1_mRNA_2815.1          | -                           | -                               |
| GF0026620 | 1                            | 0                        | 0                            | 0 Hypothetical protein (1)                                     |                                                                                                                                                                                                                                                                                                                    | Potassium channel domain [IPR013099] (1)                                                                                                                                                                                                                                                      | scaffold_1_mRNA_2814.1          | -                           | -                               |
| GF0026619 | 1                            | 0                        | 0                            | 0 Cytochrome P450 (1)                                          | iron ion binding [GO:0005506 molecular_function] (1); heme binding [GO:0020937 molecular_function] (1); oxidoreductase activity, acting on paired donors, with incorporation or reduction of molecular oxygen [GO:0010705 molecular_function] (1); oxidation-reduction process [GO:0055114 biological_process] (1) | Cytochrome P450 [IPR001128] (1); Cytochrome P450, E-class, group I [IPR02401] (1); Cytochrome P450, conserved site [IPR017972] (1)                                                                                                                                                            | scaffold_1_mRNA_2802.1          | -                           | -                               |
| GF0026618 | 1                            | 0                        | 0                            | 0 Hypothetical protein (1)                                     |                                                                                                                                                                                                                                                                                                                    |                                                                                                                                                                                                                                                                                               | scaffold_1_mRNA_2795.1          | -                           | -                               |
| GF0026617 | 1                            | 0                        | 0                            | 0 Polypeptide with a gag-like domain (1)                       |                                                                                                                                                                                                                                                                                                                    |                                                                                                                                                                                                                                                                                               | scaffold_1_mRNA_2787.1          | -                           | -                               |
| GF0026616 | 1                            | 0                        | 0                            | 0 Hypothetical protein (1)                                     | nucleic acid binding [GO:0003676 molecular_function] (1)                                                                                                                                                                                                                                                           | Ribonuclease H-like domain [IPR012337] (1); Retrotransposon gag domain [IPR005162] (1)                                                                                                                                                                                                        | scaffold_1_mRNA_2781.1          | -                           | -                               |
| GF0026615 | 1                            | 0                        | 0                            | 0 Hypothetical protein (1)                                     |                                                                                                                                                                                                                                                                                                                    |                                                                                                                                                                                                                                                                                               | scaffold_1_mRNA_2780.1          | -                           | -                               |
| GF0026614 | 1                            | 0                        | 0                            | 0 Hypothetical protein (1)                                     |                                                                                                                                                                                                                                                                                                                    |                                                                                                                                                                                                                                                                                               | scaffold_1_mRNA_2774.1          | -                           | -                               |
| GF0026613 | 1                            | 0                        | 0                            | 0 Hypothetical protein (1)                                     |                                                                                                                                                                                                                                                                                                                    | Retrotransposon gag domain [IPR005162] (1)                                                                                                                                                                                                                                                    | scaffold_1_mRNA_2754.1          | -                           | -                               |

| ID        | Num. in <i>C. clementiae</i> | Num. in <i>C. uchiha</i> | Num. in <i>P. trifoliata</i> | Note                                                                   | GO                                                                                                                                                                                                                                                                                                                                                                         | InterPro                                                                                                                                                                                                                                                                                                                | Members in <i>C. clementiae</i> | Members in <i>C. uchiha</i> | Members in <i>P. trifoliata</i> |
|-----------|------------------------------|--------------------------|------------------------------|------------------------------------------------------------------------|----------------------------------------------------------------------------------------------------------------------------------------------------------------------------------------------------------------------------------------------------------------------------------------------------------------------------------------------------------------------------|-------------------------------------------------------------------------------------------------------------------------------------------------------------------------------------------------------------------------------------------------------------------------------------------------------------------------|---------------------------------|-----------------------------|---------------------------------|
| GF0026612 | 1                            | 0                        | 0                            | 0 Monosaccharide transport protein (1)                                 |                                                                                                                                                                                                                                                                                                                                                                            |                                                                                                                                                                                                                                                                                                                         | scaffold_1_mRNA_2753.1          | -                           | -                               |
| GF0026611 | 1                            | 0                        | 0                            | 0 Hypothetical protein (1)                                             | carbohydrate metabolic process [GO:0005975 biological_process] (1); polysaccharase activity [GO:0004650 molecular_function] (1)                                                                                                                                                                                                                                            | Pectin lyase fold [IPRO12334] (1); Pectin lyase fold-virulence factor [IPRO11050] (1); Glycoside hydrolase, family 28 [IPRO00743] (1)                                                                                                                                                                                   | scaffold_1_mRNA_2748.1          | -                           | -                               |
| GF0026610 | 1                            | 0                        | 0                            | 0 domains-containing protein, putative isoform 1 (1)                   | F-box and associated interaction protein binding [GO:0005515 molecular_function] (1)                                                                                                                                                                                                                                                                                       | F-box associated interaction domain [IPRO17451] (1); F-box associated domain, type 1 [IPRO06527] (1); F-box domain [IPRO01810] (1)                                                                                                                                                                                      | scaffold_1_mRNA_2747.1          | -                           | -                               |
| GF0026609 | 1                            | 0                        | 0                            | 0 Mutator-like transposase isoform 1 (1)                               |                                                                                                                                                                                                                                                                                                                                                                            | Transposase, MuDR, plant [IPRO044332] (1); MULE transposase domain [IPRO18289] (1)                                                                                                                                                                                                                                      | scaffold_1_mRNA_273.1           | -                           | -                               |
| GF0026608 | 1                            | 0                        | 0                            | 0 SWIB domain-containing protein (1)                                   | protein binding [GO:0005515 molecular_function] (1)                                                                                                                                                                                                                                                                                                                        | SWIB domain [IPRO19835] (1); SWIB/MDM2 domain [IPRO03121] (1)                                                                                                                                                                                                                                                           | scaffold_1_mRNA_2725.1          | -                           | -                               |
| GF0026607 | 1                            | 0                        | 0                            | 0 Short chain alcohol dehydrogenase, putative (1)                      |                                                                                                                                                                                                                                                                                                                                                                            | NAD(P)-binding domain [IPRO16040] (1); Short-chain dehydrogenase/reductase SDR [IPRO02347] (1)                                                                                                                                                                                                                          | scaffold_1_mRNA_271.1           | -                           | -                               |
| GF0026606 | 1                            | 0                        | 0                            | 0 Hypothetical protein (1)                                             |                                                                                                                                                                                                                                                                                                                                                                            |                                                                                                                                                                                                                                                                                                                         | scaffold_1_mRNA_2700.1          | -                           | -                               |
| GF0026605 | 1                            | 0                        | 0                            | 0 Hypothetical protein (1)                                             |                                                                                                                                                                                                                                                                                                                                                                            | Transposase, MuDR, plant [IPRO044332] (1)                                                                                                                                                                                                                                                                               | scaffold_1_mRNA_2687.1          | -                           | -                               |
| GF0026604 | 1                            | 0                        | 0                            | 0 Hypothetical protein (1)                                             |                                                                                                                                                                                                                                                                                                                                                                            |                                                                                                                                                                                                                                                                                                                         | scaffold_1_mRNA_2680.1          | -                           | -                               |
| GF0026603 | 1                            | 0                        | 0                            | 0 Hypothetical protein (1)                                             |                                                                                                                                                                                                                                                                                                                                                                            |                                                                                                                                                                                                                                                                                                                         | scaffold_1_mRNA_2679.1          | -                           | -                               |
| GF0026602 | 1                            | 0                        | 0                            | 0 Cytokinin riboside 5'-monophosphate phosphoribohydrolase (1)         |                                                                                                                                                                                                                                                                                                                                                                            | LOG family [IPRO31100] (1)                                                                                                                                                                                                                                                                                              | scaffold_1_mRNA_2674.1          | -                           | -                               |
| GF0026601 | 1                            | 0                        | 0                            | 0 Hypothetical protein (1)                                             |                                                                                                                                                                                                                                                                                                                                                                            |                                                                                                                                                                                                                                                                                                                         | scaffold_1_mRNA_2673.1          | -                           | -                               |
| GF0026600 | 1                            | 0                        | 0                            | 0 Hypothetical protein (1)                                             |                                                                                                                                                                                                                                                                                                                                                                            |                                                                                                                                                                                                                                                                                                                         | scaffold_1_mRNA_2672.1          | -                           | -                               |
| GF0026599 | 1                            | 0                        | 0                            | 0 Hypothetical protein (1)                                             |                                                                                                                                                                                                                                                                                                                                                                            |                                                                                                                                                                                                                                                                                                                         | scaffold_1_mRNA_2671.1          | -                           | -                               |
| GF0026598 | 1                            | 0                        | 0                            | 0 Hypothetical protein (1)                                             |                                                                                                                                                                                                                                                                                                                                                                            |                                                                                                                                                                                                                                                                                                                         | scaffold_1_mRNA_2670.1          | -                           | -                               |
| GF0026597 | 1                            | 0                        | 0                            | 0 Hypothetical protein (1)                                             |                                                                                                                                                                                                                                                                                                                                                                            | Domain of unknown function DUF4283 [IPRO25558] (1)                                                                                                                                                                                                                                                                      | scaffold_1_mRNA_2668.1          | -                           | -                               |
| GF0026596 | 1                            | 0                        | 0                            | 0 AT4G05040 protein (1)                                                | regulation of salicylic acid mediated signaling pathway [GO:2000031 biological_process] (1); regulation of defense response [GO:0031347 biological_process] (1); protein binding [GO:0005515 molecular_function] (1); cellular response to salicylic acid stimulus [GO:0071446 biological_process] (1); integral component of membrane [GO:0016021 cellular_component] (1) | Ankyrin repeat-containing domain [IPRO20683] (1); PGD domain [IPRO20961] (1); Protein accelerated cell death 6 [IPRO32846] (1); Ankyrin repeat [IPRO02110] (1)                                                                                                                                                          | scaffold_1_mRNA_2653.1          | -                           | -                               |
| GF0026595 | 1                            | 0                        | 0                            | 0 Hypothetical protein (1)                                             | DNA binding [GO:0003677 molecular_function] (1); nucleic acid binding [GO:0003676 molecular_function] (1)                                                                                                                                                                                                                                                                  | Zinc finger C2H2-type [IPRO13087] (1); Zinc finger, BED-type [IPRO03656] (1)                                                                                                                                                                                                                                            | scaffold_1_mRNA_2648.1          | -                           | -                               |
| GF0026594 | 1                            | 0                        | 0                            | 0 Monosaccharide transport protein (1)                                 |                                                                                                                                                                                                                                                                                                                                                                            |                                                                                                                                                                                                                                                                                                                         | scaffold_1_mRNA_2644.1          | -                           | -                               |
| GF0026593 | 1                            | 0                        | 0                            | 0 Hypothetical protein (1)                                             | calcium ion binding [GO:0005509 molecular_function] (1); protein kinase activity [GO:0004672 molecular_function] (1); protein phosphorylation [GO:0006468 biological_process] (1); ATP binding [GO:0005524 molecular_function] (1)                                                                                                                                         | Protein kinase-like domain [IPRO11009] (1); Protein kinase domain [IPRO00719] (1); EF-hand domain pair [IPRO11992] (1); EF-hand 1, calcium-binding site [IPRO18247] (1); EF-hand domain [IPRO02048] (1); Serine/threonine-protein kinase, active site [IPRO08271] (1); Protein kinase, ATP binding site [IPRO17441] (1) | scaffold_1_mRNA_2641.1          | -                           | -                               |
| GF0026592 | 1                            | 0                        | 0                            | 0 Calcium-dependent protein kinase 29 (1)                              | protein kinase activity [GO:0004672 molecular_function] (1); protein phosphorylation [GO:0006468 biological_process] (1); ATP binding [GO:0005524 molecular_function] (1)                                                                                                                                                                                                  | Serine-threonine/tyrosine-protein kinase, catalytic domain [IPRO12453] (1); Protein kinase-like domain [IPRO11009] (1); Protein kinase domain [IPRO00719] (1)                                                                                                                                                           | scaffold_1_mRNA_2636.1          | -                           | -                               |
| GF0026591 | 1                            | 0                        | 0                            | 0 Calcium-dependent protein kinase 20 (1)                              | protein kinase activity [GO:0004672 molecular_function] (1); protein phosphorylation [GO:0006468 biological_process] (1); ATP binding [GO:0005524 molecular_function] (1)                                                                                                                                                                                                  | Protein kinase domain [IPRO00719] (1); Protein kinase-like domain [IPRO11009] (1); Protein kinase, ATP binding site [IPRO17441] (1); Serine/threonine-protein kinase, active site [IPRO08271] (1)                                                                                                                       | scaffold_1_mRNA_2630.1          | -                           | -                               |
| GF0026590 | 1                            | 0                        | 0                            | 0 Endoribonuclease L-PSP family protein (1)                            |                                                                                                                                                                                                                                                                                                                                                                            | Endoribonuclease L-PSP/chorismate mutase-like [IPRO13813] (1); RdA, conserved site [IPRO19897] (1); RdA family [IPRO06056] (1); Yjg/YER057c/UK114 family [IPRO06175] (1)                                                                                                                                                | scaffold_1_mRNA_2626.1          | -                           | -                               |
| GF0026589 | 1                            | 0                        | 0                            | 0 Hypothetical protein (1)                                             |                                                                                                                                                                                                                                                                                                                                                                            | P-loop containing nucleoside triphosphate hydrolase [IPRO27417] (1)                                                                                                                                                                                                                                                     | scaffold_1_mRNA_2608.1          | -                           | -                               |
| GF0026588 | 1                            | 0                        | 0                            | 0 Hypothetical protein (1)                                             |                                                                                                                                                                                                                                                                                                                                                                            |                                                                                                                                                                                                                                                                                                                         | scaffold_1_mRNA_2607.1          | -                           | -                               |
| GF0026587 | 1                            | 0                        | 0                            | 0 NBS-LRR class resistance protein Fy1-Ry1 (1)                         | ADP binding [GO:0043531 molecular_function] (1)                                                                                                                                                                                                                                                                                                                            | Leucine-rich repeat domain, L domain-like [IPRO32675] (1); Winged helix-turn-helix DNA-binding domain [IPRO011991] (1); P-loop containing nucleoside triphosphate hydrolase [IPRO27417] (1); NB-ARC [IPRO02182] (1)                                                                                                     | scaffold_1_mRNA_2606.1          | -                           | -                               |
| GF0026586 | 1                            | 0                        | 0                            | 0 Hypothetical protein (1)                                             |                                                                                                                                                                                                                                                                                                                                                                            |                                                                                                                                                                                                                                                                                                                         | scaffold_1_mRNA_2604.1          | -                           | -                               |
| GF0026585 | 1                            | 0                        | 0                            | 0 Hypothetical protein (1)                                             | protein dimerization activity [GO:0046983 molecular_function] (1); nucleic acid binding [GO:0003676 molecular_function] (1); membrane [GO:0016020 cellular_component] (1)                                                                                                                                                                                                  | HAT, C-terminal dimerisation domain [IPRO08906] (1); Ribonuclease H-like domain [IPRO12337] (1); TMEM14 family [IPRO05349] (1)                                                                                                                                                                                          | scaffold_1_mRNA_2596.1          | -                           | -                               |
| GF0026584 | 1                            | 0                        | 0                            | 0 Disease resistance family protein / LRR family protein, putative (1) | protein binding [GO:0005515 molecular_function] (1)                                                                                                                                                                                                                                                                                                                        | Leucine-rich repeat, typical subtype [IPRO03591] (1); Leucine-rich repeat domain, L domain-like [IPRO32675] (1); Leucine-rich repeat [IPRO01611] (1); Leucine-rich repeat-containing N-terminal, plant-type [IPRO13210] (1)                                                                                             | scaffold_1_mRNA_2585.1          | -                           | -                               |
| GF0026583 | 1                            | 0                        | 0                            | 0 Plant natriuretic peptide A (1)                                      |                                                                                                                                                                                                                                                                                                                                                                            | RipA-like protein, double-psi beta-barrel domain [IPRO09009] (1); Espamin/pollen allergen, DPB domain [IPRO07112] (1)                                                                                                                                                                                                   | scaffold_1_mRNA_258.1           | -                           | -                               |
| GF0026582 | 1                            | 0                        | 0                            | 0 MuDR family transposase isoform 1 (1)                                | zinc ion binding [GO:0008270 molecular_function] (1)                                                                                                                                                                                                                                                                                                                       | Zinc finger, SWIM-type [IPRO07527] (1); Transposase, MuDR, plant [IPRO04332] (1); MULE transposase domain [IPRO18289] (1); Zinc finger, PMZ-type [IPRO06564] (1)                                                                                                                                                        | scaffold_1_mRNA_2579.1          | -                           | -                               |
| GF0026581 | 1                            | 0                        | 0                            | 0 Hypothetical protein (1)                                             |                                                                                                                                                                                                                                                                                                                                                                            |                                                                                                                                                                                                                                                                                                                         | scaffold_1_mRNA_2575.1          | -                           | -                               |
| GF0026580 | 1                            | 0                        | 0                            | 0 Hypothetical protein (1)                                             |                                                                                                                                                                                                                                                                                                                                                                            |                                                                                                                                                                                                                                                                                                                         | scaffold_1_mRNA_2568.1          | -                           | -                               |
| GF0026579 | 1                            | 0                        | 0                            | 0 Hypothetical protein (1)                                             |                                                                                                                                                                                                                                                                                                                                                                            |                                                                                                                                                                                                                                                                                                                         | scaffold_1_mRNA_2561.1          | -                           | -                               |
| GF0026578 | 1                            | 0                        | 0                            | 0 Serine/threonine-protein phosphatase 7 long form like (1)            |                                                                                                                                                                                                                                                                                                                                                                            | Protein of unknown function DUF716 (TMEM345) [IPRO06904] (1); Aminotransferase-like, plant mobile domain [IPRO19557] (1)                                                                                                                                                                                                | scaffold_1_mRNA_2557.1          | -                           | -                               |
| GF0026577 | 1                            | 0                        | 0                            | 0 Ankyrin repeat-containing protein, putative isoform 1 (1)            | protein binding [GO:0005515 molecular_function] (1)                                                                                                                                                                                                                                                                                                                        | PGD domain [IPRO20961] (1); Ankyrin repeat-containing domain [IPRO20683] (1); Ankyrin repeat [IPRO02110] (1)                                                                                                                                                                                                            | scaffold_1_mRNA_2545.1          | -                           | -                               |
| GF0026576 | 1                            | 0                        | 0                            | 0 Hypothetical protein (1)                                             |                                                                                                                                                                                                                                                                                                                                                                            |                                                                                                                                                                                                                                                                                                                         | scaffold_1_mRNA_2544.1          | -                           | -                               |
| GF0026575 | 1                            | 0                        | 0                            | 0 Hypothetical protein (1)                                             |                                                                                                                                                                                                                                                                                                                                                                            | Leucine-rich repeat domain, L domain-like [IPRO32675] (1)                                                                                                                                                                                                                                                               | scaffold_1_mRNA_2543.1          | -                           | -                               |
| GF0026574 | 1                            | 0                        | 0                            | 0 Hypothetical protein (1)                                             |                                                                                                                                                                                                                                                                                                                                                                            | Leucine-rich repeat domain, L domain-like [IPRO32675] (1)                                                                                                                                                                                                                                                               | scaffold_1_mRNA_2542.1          | -                           | -                               |
| GF0026573 | 1                            | 0                        | 0                            | 0 Hypothetical protein (1)                                             |                                                                                                                                                                                                                                                                                                                                                                            |                                                                                                                                                                                                                                                                                                                         | scaffold_1_mRNA_2539.1          | -                           | -                               |
| GF0026572 | 1                            | 0                        | 0                            | 0 Hypothetical protein (1)                                             |                                                                                                                                                                                                                                                                                                                                                                            |                                                                                                                                                                                                                                                                                                                         | scaffold_1_mRNA_2538.1          | -                           | -                               |
| GF0026571 | 1                            | 0                        | 0                            | 0 Hypothetical protein (1)                                             |                                                                                                                                                                                                                                                                                                                                                                            | Aspartic peptidase domain [IPRO21109] (1); Xylanase inhibitor, C-terminal [IPRO32799] (1)                                                                                                                                                                                                                               | scaffold_1_mRNA_2520.1          | -                           | -                               |
| GF0026570 | 1                            | 0                        | 0                            | 0 Hypothetical protein (1)                                             |                                                                                                                                                                                                                                                                                                                                                                            |                                                                                                                                                                                                                                                                                                                         | scaffold_1_mRNA_2502.1          | -                           | -                               |
| GF0026569 | 1                            | 0                        | 0                            | 0 Hypothetical protein (1)                                             |                                                                                                                                                                                                                                                                                                                                                                            |                                                                                                                                                                                                                                                                                                                         | scaffold_1_mRNA_2501.1          | -                           | -                               |
| GF0026568 | 1                            | 0                        | 0                            | 0 Sesquiterpene synthase (1)                                           | magnesium ion binding [GO:0000287 molecular_function] (1); terpene synthase activity [GO:0010333 molecular_function] (1); lyase activity [GO:0016829 molecular_function] (1); metabolic process [GO:0008152 biological_process] (1)                                                                                                                                        | Terpene synthase, N-terminal domain [IPRO01906] (1); Terpene synthase, metal-binding domain [IPRO06303] (1); Terpenoid cyclase/protein prenyltransferase alpha-alpha toroid [IPRO08903] (1); Isoprenoid synthase domain [IPRO08949] (1)                                                                                 | scaffold_1_mRNA_2497.1          | -                           | -                               |
| GF0026567 | 1                            | 0                        | 0                            | 0 Hypothetical protein (1)                                             |                                                                                                                                                                                                                                                                                                                                                                            | Leucine-rich repeat domain, L domain-like [IPRO32675] (1); Leucine-rich repeat-containing N-terminal, plant-type [IPRO13210] (1)                                                                                                                                                                                        | scaffold_1_mRNA_2496.1          | -                           | -                               |
| GF0026566 | 1                            | 0                        | 0                            | 0 S-locus lectin kinase family protein (1)                             | recognition of pollen [GO:0048544 biological_process] (1)                                                                                                                                                                                                                                                                                                                  | S-locus glycoprotein domain [IPRO00858] (1); Bull-type lectin domain [IPRO01480] (1); PAN/Apple domain [IPRO3609] (1)                                                                                                                                                                                                   | scaffold_1_mRNA_2480.1          | -                           | -                               |
| GF0026565 | 1                            | 0                        | 0                            | 0 Polyubiquitin (1)                                                    | protein binding [GO:0005515 molecular_function] (1)                                                                                                                                                                                                                                                                                                                        | Ubiquitin conserved site [IPRO19954] (1); Ubiquitin [IPRO19956] (1); Ubiquitin-related domain [IPRO20071] (1); Ubiquitin domain [IPRO00626] (1)                                                                                                                                                                         | scaffold_1_mRNA_2477.2          | -                           | -                               |
| GF0026564 | 1                            | 0                        | 0                            | 0 Hypothetical protein (1)                                             |                                                                                                                                                                                                                                                                                                                                                                            |                                                                                                                                                                                                                                                                                                                         | scaffold_1_mRNA_2474.1          | -                           | -                               |
| GF0026563 | 1                            | 0                        | 0                            | 0 Hypothetical protein (1)                                             |                                                                                                                                                                                                                                                                                                                                                                            |                                                                                                                                                                                                                                                                                                                         | scaffold_1_mRNA_2468.1          | -                           | -                               |



| ID       | Num. in <i>C. clementiae</i> | Num. in <i>C. uchiha</i> | Num. in <i>P. trifoliata</i> | Note                                                                | GO                                                                                                                                                                                                                                                                                                                                                                     | InterPro                                                                                                                                                                                                                                                                                                                                                                                                       | Members in <i>C. clementiae</i> | Members in <i>C. uchiha</i> | Members in <i>P. trifoliata</i> |
|----------|------------------------------|--------------------------|------------------------------|---------------------------------------------------------------------|------------------------------------------------------------------------------------------------------------------------------------------------------------------------------------------------------------------------------------------------------------------------------------------------------------------------------------------------------------------------|----------------------------------------------------------------------------------------------------------------------------------------------------------------------------------------------------------------------------------------------------------------------------------------------------------------------------------------------------------------------------------------------------------------|---------------------------------|-----------------------------|---------------------------------|
| GF002652 | 1                            | 0                        | 0                            | 0 Hypothetical protein (1)                                          | protein phosphorylation [GO:0006468 biological_process] (1); protein kinase activity [GO:000472 molecular_function] (1); ATP binding [GO:0005524 molecular_function] (1)                                                                                                                                                                                               | Serine/threonine-protein kinase, active site [IPR08271] (1); Serine/threonine/tyrosine-protein kinase, catalytic domain [IPR01245] (1); LysM domain [IPR018392] (1); Protein kinase domain [IPR00719] (1); Protein kinase-like domain [IPR01009] (1)                                                                                                                                                           | scaffold_1_mRNA_246.1           | -                           | -                               |
| GF002651 | 1                            | 0                        | 0                            | 0 Hypothetical protein (1)                                          | protein kinase activity [GO:000472 molecular_function] (1); protein phosphorylation [GO:0006468 biological_process] (1); ATP binding [GO:0005524 molecular_function] (1)                                                                                                                                                                                               | Leucine-rich repeat domain, L domain-like [IPR032675] (1)                                                                                                                                                                                                                                                                                                                                                      | scaffold_1_mRNA_2459.1          | -                           | -                               |
| GF002650 | 1                            | 0                        | 0                            | 0 Lectin receptor kinase (1)                                        | protein kinase activity [GO:000472 molecular_function] (1); protein phosphorylation [GO:0006468 biological_process] (1); ATP binding [GO:0005524 molecular_function] (1)                                                                                                                                                                                               | Protein kinase domain [IPR00719] (1); Protein kinase-like domain [IPR01009] (1); Concavulinin-like lectin/glucanase domain [IPR013320] (1)                                                                                                                                                                                                                                                                     | scaffold_1_mRNA_245.1           | -                           | -                               |
| GF002659 | 1                            | 0                        | 0                            | 0 Hypothetical protein (1)                                          | metabolic process [GO:0008152 biological_process] (1); magnesium ion binding [GO:0000287 molecular_function] (1); terpenoid synthase activity [GO:0010333 molecular_function] (1); lyase activity [GO:0016829 molecular_function] (1)                                                                                                                                  | Isoprenoid synthase domain [IPR008949] (1); Terpenoid cyclases/protein prenyltransferase alpha-alpha toroid [IPR008930] (1); Terpenoid synthase, metal-binding domain [IPR005630] (1); Terpenoid synthase, N-terminal domain [IPR001906] (1)                                                                                                                                                                   | scaffold_1_mRNA_2448.1          | -                           | -                               |
| GF002658 | 1                            | 0                        | 0                            | 0 Vetsipadiene synthase (1)                                         | metabolic process [GO:0008152 biological_process] (1); magnesium ion binding [GO:0000287 molecular_function] (1); terpenoid synthase activity [GO:0010333 molecular_function] (1); lyase activity [GO:0016829 molecular_function] (1)                                                                                                                                  | Isoprenoid synthase domain [IPR008949] (1); Terpenoid cyclases/protein prenyltransferase alpha-alpha toroid [IPR008930] (1); Terpenoid synthase, metal-binding domain [IPR005630] (1); Terpenoid synthase, N-terminal domain [IPR001906] (1)                                                                                                                                                                   | scaffold_1_mRNA_2446.1          | -                           | -                               |
| GF002657 | 1                            | 0                        | 0                            | 0 Pentapeptide repeat-containing protein, mitochondrial (1)         | DNA integration [GO:0015074 biological_process] (1); nucleic acid binding [GO:0003676 molecular_function] (1)                                                                                                                                                                                                                                                          | Integrase, catalytic core [IPR01584] (1); Reverse transcriptase, RNA-dependent DNA polymerase [IPR013103] (1); Ribonuclease H-like domain [IPR012337] (1); GAG-Pre-integrase domain [IPR025724] (1)                                                                                                                                                                                                            | scaffold_1_mRNA_2445.1          | -                           | -                               |
| GF002656 | 1                            | 0                        | 0                            | 0 Putative retroelement pol polyprotein (1)                         | DNA integration [GO:0015074 biological_process] (1); nucleic acid binding [GO:0003676 molecular_function] (1)                                                                                                                                                                                                                                                          | Integrase, catalytic core [IPR01584] (1); Reverse transcriptase, RNA-dependent DNA polymerase [IPR013103] (1); Ribonuclease H-like domain [IPR012337] (1); GAG-Pre-integrase domain [IPR025724] (1)                                                                                                                                                                                                            | scaffold_1_mRNA_2440.1          | -                           | -                               |
| GF002655 | 1                            | 0                        | 0                            | 0 Hypothetical protein (1)                                          |                                                                                                                                                                                                                                                                                                                                                                        | Ataxin-2, C-terminal [IPR009818] (1)                                                                                                                                                                                                                                                                                                                                                                           | scaffold_1_mRNA_2437.1          | -                           | -                               |
| GF002654 | 1                            | 0                        | 0                            | 0 Hypothetical protein (1)                                          |                                                                                                                                                                                                                                                                                                                                                                        | Concavulinin-like lectin/glucanase domain [IPR013320] (1); Legume lectin domain [IPR01220] (1)                                                                                                                                                                                                                                                                                                                 | scaffold_1_mRNA_2432.1          | -                           | -                               |
| GF002653 | 1                            | 0                        | 0                            | 0 Lectin (1)                                                        | carbohydrate binding [GO:0030246 molecular_function] (1)                                                                                                                                                                                                                                                                                                               | Concavulinin-like lectin/glucanase domain [IPR013320] (1); Legume lectin domain [IPR01220] (1)                                                                                                                                                                                                                                                                                                                 | scaffold_1_mRNA_243.1           | -                           | -                               |
| GF002652 | 1                            | 0                        | 0                            | 0 Hypothetical protein (1)                                          |                                                                                                                                                                                                                                                                                                                                                                        | Endonuclease/exonuclease/phosphatase [IPR005135] (1)                                                                                                                                                                                                                                                                                                                                                           | scaffold_1_mRNA_2428.1          | -                           | -                               |
| GF002651 | 1                            | 0                        | 0                            | 0 Hypothetical protein (1)                                          | lyase activity [GO:0016829 molecular_function] (1); terpenoid synthase activity [GO:0010333 molecular_function] (1); magnesium ion binding [GO:0000287 molecular_function] (1)                                                                                                                                                                                         | Isoprenoid synthase domain [IPR008949] (1); Terpenoid synthase, metal-binding domain [IPR005630] (1)                                                                                                                                                                                                                                                                                                           | scaffold_1_mRNA_2424.1          | -                           | -                               |
| GF002650 | 1                            | 0                        | 0                            | 0 Hypothetical protein (1)                                          |                                                                                                                                                                                                                                                                                                                                                                        | Legume lectin domain [IPR01220] (1); Concavulinin-like lectin/glucanase domain [IPR013320] (1); Legume lectin, beta chain, Mn/Ca-binding site [IPR019825] (1)                                                                                                                                                                                                                                                  | scaffold_1_mRNA_2421.1          | -                           | -                               |
| GF002649 | 1                            | 0                        | 0                            | 0 Lectin (1)                                                        | carbohydrate binding [GO:0030246 molecular_function] (1)                                                                                                                                                                                                                                                                                                               | Concavulinin-like lectin/glucanase domain [IPR013320] (1); Legume lectin, beta chain, Mn/Ca-binding site [IPR019825] (1)                                                                                                                                                                                                                                                                                       | scaffold_1_mRNA_240.1           | -                           | -                               |
| GF002648 | 1                            | 0                        | 0                            | 0 (+)-delta-cadinene synthase isozyme A (1)                         | metabolic process [GO:0008152 biological_process] (1); lyase activity [GO:0016829 molecular_function] (1); terpenoid synthase activity [GO:0010333 molecular_function] (1); magnesium ion binding [GO:0000287 molecular_function] (1)                                                                                                                                  | Terpenoid cyclases/protein prenyltransferase alpha-alpha toroid [IPR008930] (1); Terpenoid synthase, N-terminal domain [IPR001906] (1); Terpenoid synthase, metal-binding domain [IPR005630] (1); Isoprenoid synthase domain [IPR008949] (1)                                                                                                                                                                   | scaffold_1_mRNA_2399.1          | -                           | -                               |
| GF002647 | 1                            | 0                        | 0                            | 0 Hypothetical protein (1)                                          |                                                                                                                                                                                                                                                                                                                                                                        | Isoprenoid synthase domain [IPR008949] (1)                                                                                                                                                                                                                                                                                                                                                                     | scaffold_1_mRNA_2397.1          | -                           | -                               |
| GF002646 | 1                            | 0                        | 0                            | 0 Cysteine-rich RLK (RECEPTOR-like protein kinase) 8 (1)            | proteolysis [GO:0006508 biological_process] (1); cysteine-type peptidase activity [GO:0008234 molecular_function] (1)                                                                                                                                                                                                                                                  | Ulp1 protease family, C-terminal catalytic domain [IPR003653] (1); Reverse transcriptase, RNA-dependent DNA polymerase [IPR013103] (1)                                                                                                                                                                                                                                                                         | scaffold_1_mRNA_2386.1          | -                           | -                               |
| GF002645 | 1                            | 0                        | 0                            | 0 Cytokinin riboside 5'-monophosphate phosphoribohydrolase (1)      |                                                                                                                                                                                                                                                                                                                                                                        | Cytokinin riboside 5'-monophosphate phosphoribohydrolase [LOG:IPR005269] (1); LOG family [IPR031100] (1)                                                                                                                                                                                                                                                                                                       | scaffold_1_mRNA_2385.1          | -                           | -                               |
| GF002644 | 1                            | 0                        | 0                            | 0 Hypothetical protein (1)                                          |                                                                                                                                                                                                                                                                                                                                                                        |                                                                                                                                                                                                                                                                                                                                                                                                                | scaffold_1_mRNA_2384.1          | -                           | -                               |
| GF002643 | 1                            | 0                        | 0                            | 0 Hypothetical protein (1)                                          |                                                                                                                                                                                                                                                                                                                                                                        |                                                                                                                                                                                                                                                                                                                                                                                                                | scaffold_1_mRNA_2383.1          | -                           | -                               |
| GF002642 | 1                            | 0                        | 0                            | 0 Hypothetical protein (1)                                          |                                                                                                                                                                                                                                                                                                                                                                        |                                                                                                                                                                                                                                                                                                                                                                                                                | scaffold_1_mRNA_238.1           | -                           | -                               |
| GF002641 | 1                            | 0                        | 0                            | 0 Hypothetical protein (1)                                          | cysteine-type peptidase activity [GO:0008234 molecular_function] (1); proteolysis [GO:0006508 biological_process] (1)                                                                                                                                                                                                                                                  | Ulp1 protease family, C-terminal catalytic domain [IPR003653] (1)                                                                                                                                                                                                                                                                                                                                              | scaffold_1_mRNA_2370.1          | -                           | -                               |
| GF002640 | 1                            | 0                        | 0                            | 0 Hypothetical protein (1)                                          |                                                                                                                                                                                                                                                                                                                                                                        | Retrotransposon gag domain [IPR005162] (1)                                                                                                                                                                                                                                                                                                                                                                     | scaffold_1_mRNA_237.1           | -                           | -                               |
| GF002639 | 1                            | 0                        | 0                            | 0 Hypothetical protein (1)                                          |                                                                                                                                                                                                                                                                                                                                                                        |                                                                                                                                                                                                                                                                                                                                                                                                                | scaffold_1_mRNA_2363.1          | -                           | -                               |
| GF002638 | 1                            | 0                        | 0                            | 0 S-locus lectin protein kinase family protein, putative (1)        |                                                                                                                                                                                                                                                                                                                                                                        | Bull-type lectin domain [IPR001480] (1)                                                                                                                                                                                                                                                                                                                                                                        | scaffold_1_mRNA_2360.1          | -                           | -                               |
| GF002637 | 1                            | 0                        | 0                            | 0 Hypothetical protein (1)                                          |                                                                                                                                                                                                                                                                                                                                                                        |                                                                                                                                                                                                                                                                                                                                                                                                                | scaffold_1_mRNA_2357.1          | -                           | -                               |
| GF002636 | 1                            | 0                        | 0                            | 0 Hypothetical protein (1)                                          |                                                                                                                                                                                                                                                                                                                                                                        |                                                                                                                                                                                                                                                                                                                                                                                                                | scaffold_1_mRNA_2356.1          | -                           | -                               |
| GF002635 | 1                            | 0                        | 0                            | 0 Hypothetical protein (1)                                          |                                                                                                                                                                                                                                                                                                                                                                        |                                                                                                                                                                                                                                                                                                                                                                                                                | scaffold_1_mRNA_2355.1          | -                           | -                               |
| GF002634 | 1                            | 0                        | 0                            | 0 Cysteine-rich RLK (Receptor-like protein kinase) (1)              | protein kinase activity [GO:000472 molecular_function] (1); protein serine/threonine kinase activity [GO:0004674 molecular_function] (1); protein phosphorylation [GO:0006468 biological_process] (1); ATP binding [GO:0005524 molecular_function] (1)                                                                                                                 | Protein kinase-like domain [IPR011009] (1); Protein kinase domain [IPR00719] (1); Serine/threonine-protein kinase, active site [IPR008271] (1); S-locus receptor kinase, C-terminal [IPR021820] (1); Serine/threonine/tyrosine-protein kinase, catalytic domain [IPR001245] (1)                                                                                                                                | scaffold_1_mRNA_2354.1          | -                           | -                               |
| GF002633 | 1                            | 0                        | 0                            | 0 Hypothetical protein (1)                                          |                                                                                                                                                                                                                                                                                                                                                                        |                                                                                                                                                                                                                                                                                                                                                                                                                | scaffold_1_mRNA_235.1           | -                           | -                               |
| GF002632 | 1                            | 0                        | 0                            | 0 Hypothetical protein (1)                                          |                                                                                                                                                                                                                                                                                                                                                                        |                                                                                                                                                                                                                                                                                                                                                                                                                | scaffold_1_mRNA_2341.1          | -                           | -                               |
| GF002631 | 1                            | 0                        | 0                            | 0 Hypothetical protein (1)                                          | nucleic acid binding [GO:0003676 molecular_function] (1)                                                                                                                                                                                                                                                                                                               | Ribonuclease H-like domain [IPR012337] (1)                                                                                                                                                                                                                                                                                                                                                                     | scaffold_1_mRNA_2339.1          | -                           | -                               |
| GF002630 | 1                            | 0                        | 0                            | 0 Hypothetical protein (1)                                          |                                                                                                                                                                                                                                                                                                                                                                        |                                                                                                                                                                                                                                                                                                                                                                                                                | scaffold_1_mRNA_2336.1          | -                           | -                               |
| GF002629 | 1                            | 0                        | 0                            | 0 Cytokinin riboside 5'-monophosphate phosphoribohydrolase (1)      |                                                                                                                                                                                                                                                                                                                                                                        | LOG family [IPR031100] (1)                                                                                                                                                                                                                                                                                                                                                                                     | scaffold_1_mRNA_2334.1          | -                           | -                               |
| GF002628 | 1                            | 0                        | 0                            | 0 Hypothetical protein (1)                                          |                                                                                                                                                                                                                                                                                                                                                                        |                                                                                                                                                                                                                                                                                                                                                                                                                | scaffold_1_mRNA_2333.1          | -                           | -                               |
| GF002627 | 1                            | 0                        | 0                            | 0 Hypothetical protein (1)                                          |                                                                                                                                                                                                                                                                                                                                                                        |                                                                                                                                                                                                                                                                                                                                                                                                                | scaffold_1_mRNA_2331.1          | -                           | -                               |
| GF002626 | 1                            | 0                        | 0                            | 0 Hypothetical protein (1)                                          |                                                                                                                                                                                                                                                                                                                                                                        |                                                                                                                                                                                                                                                                                                                                                                                                                | scaffold_1_mRNA_2329.1          | -                           | -                               |
| GF002625 | 1                            | 0                        | 0                            | 0 S-locus lectin kinase family protein, putative (1)                | recognition of pollen [GO:0048544 biological_process] (1)                                                                                                                                                                                                                                                                                                              | Bull-type lectin domain [IPR001480] (1); S-locus glycoprotein domain [IPR000858] (1); Bull-type lectin domain [IPR001480] (1)                                                                                                                                                                                                                                                                                  | scaffold_1_mRNA_2327.1          | -                           | -                               |
| GF002624 | 1                            | 0                        | 0                            | 0 Hypothetical protein (1)                                          | nucleic acid binding [GO:0003676 molecular_function] (1)                                                                                                                                                                                                                                                                                                               | Ribonuclease H-like domain [IPR012337] (1)                                                                                                                                                                                                                                                                                                                                                                     | scaffold_1_mRNA_2325.1          | -                           | -                               |
| GF002623 | 1                            | 0                        | 0                            | 0 Hypothetical protein (1)                                          |                                                                                                                                                                                                                                                                                                                                                                        | PAN/Apple domain [IPR003609] (1); Protein kinase-like domain [IPR011009] (1)                                                                                                                                                                                                                                                                                                                                   | scaffold_1_mRNA_2324.1          | -                           | -                               |
| GF002622 | 1                            | 0                        | 0                            | 0 Hypothetical protein (1)                                          | nucleic acid binding [GO:0003676 molecular_function] (1)                                                                                                                                                                                                                                                                                                               | Ribonuclease H-like domain [IPR012337] (1); Retrotransposon gag domain [IPR005162] (1)                                                                                                                                                                                                                                                                                                                         | scaffold_1_mRNA_2323.1          | -                           | -                               |
| GF002621 | 1                            | 0                        | 0                            | 0 Hypothetical protein (1)                                          | nucleic acid binding [GO:0003676 molecular_function] (1)                                                                                                                                                                                                                                                                                                               | Ribonuclease H-like domain [IPR012337] (1); Retrotransposon gag domain [IPR005162] (1)                                                                                                                                                                                                                                                                                                                         | scaffold_1_mRNA_2321.1          | -                           | -                               |
| GF002620 | 1                            | 0                        | 0                            | 0 Hypothetical protein (1)                                          |                                                                                                                                                                                                                                                                                                                                                                        |                                                                                                                                                                                                                                                                                                                                                                                                                | scaffold_1_mRNA_2320.1          | -                           | -                               |
| GF002619 | 1                            | 0                        | 0                            | 0 Hypothetical protein (1)                                          |                                                                                                                                                                                                                                                                                                                                                                        |                                                                                                                                                                                                                                                                                                                                                                                                                | scaffold_1_mRNA_2319.1          | -                           | -                               |
| GF002618 | 1                            | 0                        | 0                            | 0 Hypothetical protein (1)                                          | recognition of pollen [GO:0048544 biological_process] (1)                                                                                                                                                                                                                                                                                                              | Bull-type lectin domain [IPR001480] (1); S-locus glycoprotein domain [IPR000858] (1)                                                                                                                                                                                                                                                                                                                           | scaffold_1_mRNA_2318.1          | -                           | -                               |
| GF002617 | 1                            | 0                        | 0                            | 0 Monosaccharide transport protein (1)                              |                                                                                                                                                                                                                                                                                                                                                                        |                                                                                                                                                                                                                                                                                                                                                                                                                | scaffold_1_mRNA_2316.1          | -                           | -                               |
| GF002616 | 1                            | 0                        | 0                            | 0 Hypothetical protein (1)                                          | RNA-DNA hybrid ribonuclease activity [GO:004523 molecular_function] (1); nucleic acid binding [GO:0003676 molecular_function] (1)                                                                                                                                                                                                                                      | Retrotransposon gag domain [IPR005162] (1); Ribonuclease H-like domain [IPR012337] (1); Ribonuclease H domain [IPR02156] (1)                                                                                                                                                                                                                                                                                   | scaffold_1_mRNA_2315.1          | -                           | -                               |
| GF002615 | 1                            | 0                        | 0                            | 0 G-type lectin S-receptor-like serine/threonine-protein kinase (1) | protein serine/threonine kinase activity [GO:0004674 molecular_function] (1); protein kinase activity [GO:000472 molecular_function] (1); protein phosphorylation [GO:0006468 biological_process] (1); recognition of pollen [GO:0048544 biological_process] (1); ATP binding [GO:0005524 molecular_function] (1); protein binding [GO:0005515 molecular_function] (1) | Protein kinase domain [IPR00719] (1); Protein kinase-like domain [IPR011009] (1); S-locus receptor kinase, C-terminal [IPR021820] (1); Serine/threonine/tyrosine-protein kinase, active site [IPR008271] (1); S-locus glycoprotein domain [IPR000858] (1); EGF-like domain [IPR00742] (1); Serine/threonine/tyrosine-protein kinase, catalytic domain [IPR001245] (1); Bull-type lectin domain [IPR001480] (1) | scaffold_1_mRNA_2313.1          | -                           | -                               |
| GF002614 | 1                            | 0                        | 0                            | 0 Monosaccharide transport protein (1)                              |                                                                                                                                                                                                                                                                                                                                                                        |                                                                                                                                                                                                                                                                                                                                                                                                                | scaffold_1_mRNA_2311.1          | -                           | -                               |
| GF002613 | 1                            | 0                        | 0                            | 0 G-type lectin S-receptor-like serine/threonine-protein kinase (1) | recognition of pollen [GO:0048544 biological_process] (1); protein phosphorylation [GO:0006468 biological_process] (1); protein kinase activity [GO:0004674 molecular_function] (1); ATP binding [GO:0005524 molecular_function] (1)                                                                                                                                   | Serine/threonine-protein kinase, active site [IPR008271] (1); Serine/threonine/tyrosine-protein kinase, catalytic domain [IPR001245] (1); S-locus glycoprotein domain [IPR000858] (1); PAN/Apple domain [IPR003609] (1); Protein kinase domain [IPR00719] (1); Protein kinase-like domain [IPR011009] (1)                                                                                                      | scaffold_1_mRNA_2309.1          | -                           | -                               |
| GF002612 | 1                            | 0                        | 0                            | 0 Hypothetical protein (1)                                          | nucleic acid binding [GO:0003676 molecular_function] (1)                                                                                                                                                                                                                                                                                                               | Ribonuclease H-like domain [IPR012337] (1)                                                                                                                                                                                                                                                                                                                                                                     | scaffold_1_mRNA_2307.1          | -                           | -                               |
| GF002611 | 1                            | 0                        | 0                            | 0 Hypothetical protein (1)                                          |                                                                                                                                                                                                                                                                                                                                                                        |                                                                                                                                                                                                                                                                                                                                                                                                                | scaffold_1_mRNA_2304.1          | -                           | -                               |

| ID        | Num in <i>C. clementinae</i> | Num in <i>C. uchiha</i> | Num in <i>P. trifoliata</i> | Note                                                                | GO                                                                                                                                                                                                                                                                                                                 | InterPro                                                                                                                                                                                                                                                                                                                                                                                                                                                                  | Members in <i>C. clementinae</i> | Members in <i>C. uchiha</i> | Members in <i>P. trifoliata</i> |
|-----------|------------------------------|-------------------------|-----------------------------|---------------------------------------------------------------------|--------------------------------------------------------------------------------------------------------------------------------------------------------------------------------------------------------------------------------------------------------------------------------------------------------------------|---------------------------------------------------------------------------------------------------------------------------------------------------------------------------------------------------------------------------------------------------------------------------------------------------------------------------------------------------------------------------------------------------------------------------------------------------------------------------|----------------------------------|-----------------------------|---------------------------------|
| GF0026510 | 1                            | 0                       | 0                           | 0 Disease resistance N-like protein (1)                             | ADP binding [GO:0043531 molecular_function] (1)                                                                                                                                                                                                                                                                    | Winged helix-turn-helix DNA-binding domain [IPR011991] (1); Leucine-rich repeat domain, L domain-like [IPR032675] (1); P-loop containing nucleoside triphosphate hydrolase [IPR027417] (1); NB-ARC [IPR002182] (1)                                                                                                                                                                                                                                                        | scaffold_1_mRNA_2302.1           | -                           | -                               |
| GF0026509 | 1                            | 0                       | 0                           | 0 Hypothetical protein (1)                                          | protein serine/threonine kinase activity [GO:0004674 molecular_function] (1)                                                                                                                                                                                                                                       | S-locus receptor kinase, C-terminal [IPR021820] (1)                                                                                                                                                                                                                                                                                                                                                                                                                       | scaffold_1_mRNA_2296.1           | -                           | -                               |
| GF0026508 | 1                            | 0                       | 0                           | 0 Hypothetical protein (1)                                          |                                                                                                                                                                                                                                                                                                                    | Retrotransposon gag domain [IPR05162] (1)                                                                                                                                                                                                                                                                                                                                                                                                                                 | scaffold_1_mRNA_2290.1           | -                           | -                               |
| GF0026507 | 1                            | 0                       | 0                           | 0 S-locus lectin kinase family protein (1)                          | ATP binding [GO:0005524 molecular_function] (1); protein kinase activity [GO:0004672 molecular_function] (1); protein phosphorylation [GO:0006468 biological_process] (1); recognition of pollen [GO:0048544 biological_process] (1)                                                                               | PAN/Apple domain [IPR003609] (1); Serine/threonine-protein kinase, active site [IPR008271] (1); S-locus glycoprotein domain [IPR000858] (1); Serine/threonine-tyrosine-protein kinase, catalytic domain [IPR001245] (1); Protein kinase-like domain [IPR011009] (1); Protein kinase domain [IPR000719] (1)                                                                                                                                                                | scaffold_1_mRNA_2288.1           | -                           | -                               |
| GF0026506 | 1                            | 0                       | 0                           | 0 Hypothetical protein (1)                                          |                                                                                                                                                                                                                                                                                                                    | Aspartic peptidase domain [IPR021109] (1)                                                                                                                                                                                                                                                                                                                                                                                                                                 | scaffold_1_mRNA_2286.1           | -                           | -                               |
| GF0026505 | 1                            | 0                       | 0                           | 0 Transposase family tnp2, putative (1)                             |                                                                                                                                                                                                                                                                                                                    | Domain of unknown function DUF4218 [IPR025452] (1); Transposon, En/Spm-like [IPR004242] (1); Probable transposase, P1a/En/Spm, plant [IPR04252] (1); Transposase, Tnp1/En/Spm-like [IPR004264] (1); Transposase-associated domain [IPR029400] (1)                                                                                                                                                                                                                         | scaffold_1_mRNA_2281.1           | -                           | -                               |
| GF0026504 | 1                            | 0                       | 0                           | 0 G-type lectin S-receptor-like serine/threonine-protein kinase (1) | protein phosphorylation [GO:0006468 biological_process] (1); recognition of pollen [GO:0048544 biological_process] (1); protein serine/threonine kinase activity [GO:0004674 molecular_function] (1); protein kinase activity [GO:0004672 molecular_function] (1); ATP binding [GO:0005524 molecular_function] (1) | Serine/threonine-protein kinase, active site [IPR008271] (1); Serine/threonine/tyrosine-protein kinase, catalytic domain [IPR001245] (1); S-locus glycoprotein domain [IPR000858] (1); PAN/Apple domain [IPR003609] (1); Bull-type lectin domain [IPR001480] (1); Protein kinase domain [IPR000719] (1); Protein kinase-like domain [IPR011009] (1); S-receptor-like serine/threonine-protein kinase [IPR024171] (1)                                                      | scaffold_1_mRNA_2280.1           | -                           | -                               |
| GF0026503 | 1                            | 0                       | 0                           | 0 Hypothetical protein (1)                                          |                                                                                                                                                                                                                                                                                                                    | Leucine-rich repeat domain, L domain-like [IPR032675] (1)                                                                                                                                                                                                                                                                                                                                                                                                                 | scaffold_1_mRNA_228.1            | -                           | -                               |
| GF0026502 | 1                            | 0                       | 0                           | 0 G-type lectin S-receptor-like serine/threonine-protein kinase (1) | ATP binding [GO:0005524 molecular_function] (1); protein kinase activity [GO:0004672 molecular_function] (1); protein serine/threonine kinase activity [GO:0004674 molecular_function] (1); recognition of pollen [GO:0048544 biological_process] (1); protein phosphorylation [GO:0006468 biological_process] (1) | PAN/Apple domain [IPR003609] (1); Bull-type lectin domain [IPR001480] (1); Serine/threonine-protein kinase, active site [IPR008271] (1); S-locus receptor kinase, C-terminal [IPR021820] (1); Serine/threonine/tyrosine-protein kinase, catalytic domain [IPR001245] (1); S-locus glycoprotein domain [IPR000858] (1); Protein kinase-like domain [IPR011009] (1); S-receptor-like serine/threonine-protein kinase [IPR024171] (1); Protein kinase domain [IPR000719] (1) | scaffold_1_mRNA_2277.1           | -                           | -                               |
| GF0026501 | 1                            | 0                       | 0                           | 0 Hypothetical protein (1)                                          |                                                                                                                                                                                                                                                                                                                    |                                                                                                                                                                                                                                                                                                                                                                                                                                                                           | scaffold_1_mRNA_2276.1           | -                           | -                               |
| GF0026500 | 1                            | 0                       | 0                           | 0 Hypothetical protein (1)                                          |                                                                                                                                                                                                                                                                                                                    | Bull-type lectin domain [IPR001480] (1)                                                                                                                                                                                                                                                                                                                                                                                                                                   | scaffold_1_mRNA_2273.1           | -                           | -                               |
| GF0026499 | 1                            | 0                       | 0                           | 0 Monosaccharide transport protein (1)                              |                                                                                                                                                                                                                                                                                                                    |                                                                                                                                                                                                                                                                                                                                                                                                                                                                           | scaffold_1_mRNA_2271.1           | -                           | -                               |
| GF0026498 | 1                            | 0                       | 0                           | 0 G-type lectin S-receptor-like serine/threonine-protein kinase (1) | ATP binding [GO:0005524 molecular_function] (1); protein serine/threonine kinase activity [GO:0004674 molecular_function] (1); protein kinase activity [GO:0004672 molecular_function] (1); protein phosphorylation [GO:0006468 biological_process] (1); recognition of pollen [GO:0048544 biological_process] (1) | Protein kinase-like domain [IPR011009] (1); S-receptor-like serine/threonine-protein kinase [IPR024171] (1); Protein kinase domain [IPR000719] (1); Bull-type lectin domain [IPR001480] (1); PAN/Apple domain [IPR003609] (1); S-locus receptor kinase, C-terminal [IPR021820] (1); Serine/threonine-protein kinase, active site [IPR008271] (1); S-locus glycoprotein domain [IPR000858] (1); Serine/threonine/tyrosine-protein kinase, catalytic domain [IPR001245] (1) | scaffold_1_mRNA_2269.1           | -                           | -                               |
| GF0026497 | 1                            | 0                       | 0                           | 0 Hypothetical protein (1)                                          |                                                                                                                                                                                                                                                                                                                    | Retrotransposon gag domain [IPR05162] (1)                                                                                                                                                                                                                                                                                                                                                                                                                                 | scaffold_1_mRNA_2268.1           | -                           | -                               |
| GF0026496 | 1                            | 0                       | 0                           | 0 Cysteine-rich RLK 10 (1)                                          | protein serine/threonine kinase activity [GO:0004674 molecular_function] (1); protein kinase activity [GO:0004672 molecular_function] (1); protein phosphorylation [GO:0006468 biological_process] (1); ATP binding [GO:0005524 molecular_function] (1)                                                            | Protein kinase-like domain [IPR011009] (1); Serine/threonine-protein kinase, catalytic domain [IPR001245] (1); Aspartic peptidase domain [IPR021109] (1); Protein kinase, ATP binding site [IPR017441] (1); Serine/threonine-protein kinase, active site [IPR008271] (1); S-locus receptor kinase, C-terminal [IPR021820] (1)                                                                                                                                             | scaffold_1_mRNA_2265.1           | -                           | -                               |
| GF0026495 | 1                            | 0                       | 0                           | 0 Retrotransposon gag protein (1)                                   |                                                                                                                                                                                                                                                                                                                    | Retrotransposon gag domain [IPR05162] (1); OAR domain [IPR03654] (1)                                                                                                                                                                                                                                                                                                                                                                                                      | scaffold_1_mRNA_2264.1           | -                           | -                               |
| GF0026494 | 1                            | 0                       | 0                           | 0 G-type lectin S-receptor-like serine/threonine-protein kinase (1) | recognition of pollen [GO:0048544 biological_process] (1); protein phosphorylation [GO:0006468 biological_process] (1); protein kinase activity [GO:0004672 molecular_function] (1); protein serine/threonine kinase activity [GO:0004674 molecular_function] (1); ATP binding [GO:0005524 molecular_function] (1) | Protein kinase-like domain [IPR011009] (1); S-receptor-like serine/threonine-protein kinase [IPR024171] (1); Protein kinase domain [IPR000719] (1); PAN/Apple domain [IPR003609] (1); Bull-type lectin domain [IPR001480] (1); Serine/threonine-protein kinase, active site [IPR008271] (1); Serine/threonine/tyrosine-protein kinase, catalytic domain [IPR001245] (1); S-locus glycoprotein domain [IPR000858] (1)                                                      | scaffold_1_mRNA_2261.1           | -                           | -                               |
| GF0026493 | 1                            | 0                       | 0                           | 0 Retrotransposon gag protein (1)                                   |                                                                                                                                                                                                                                                                                                                    | Retrotransposon gag domain [IPR05162] (1)                                                                                                                                                                                                                                                                                                                                                                                                                                 | scaffold_1_mRNA_2256.1           | -                           | -                               |
| GF0026492 | 1                            | 0                       | 0                           | 0 G-type lectin S-receptor-like serine/threonine-protein kinase (1) | protein kinase activity [GO:0004672 molecular_function] (1); protein phosphorylation [GO:0006468 biological_process] (1); ATP binding [GO:0005524 molecular_function] (1)                                                                                                                                          | PAN/Apple domain [IPR003609] (1); Serine/threonine/tyrosine-protein kinase, catalytic domain [IPR001245] (1); Serine/threonine-protein kinase, active site [IPR008271] (1); Protein kinase-like domain [IPR011009] (1); Protein kinase domain [IPR000719] (1)                                                                                                                                                                                                             | scaffold_1_mRNA_2252.1           | -                           | -                               |
| GF0026491 | 1                            | 0                       | 0                           | 0 Hypothetical protein (1)                                          |                                                                                                                                                                                                                                                                                                                    | Aspartic peptidase domain [IPR021109] (1); Retrotransposon gag domain [IPR05162] (1)                                                                                                                                                                                                                                                                                                                                                                                      | scaffold_1_mRNA_2251.1           | -                           | -                               |
| GF0026490 | 1                            | 0                       | 0                           | 0 Hypothetical protein (1)                                          |                                                                                                                                                                                                                                                                                                                    | Bull-type lectin domain [IPR001480] (1); PAN/Apple domain [IPR003609] (1)                                                                                                                                                                                                                                                                                                                                                                                                 | scaffold_1_mRNA_2250.1           | -                           | -                               |
| GF0026489 | 1                            | 0                       | 0                           | 0 Hypothetical protein (1)                                          |                                                                                                                                                                                                                                                                                                                    |                                                                                                                                                                                                                                                                                                                                                                                                                                                                           | scaffold_1_mRNA_2246.1           | -                           | -                               |
| GF0026488 | 1                            | 0                       | 0                           | 0 Hypothetical protein (1)                                          |                                                                                                                                                                                                                                                                                                                    | Aspartic peptidase domain [IPR021109] (1)                                                                                                                                                                                                                                                                                                                                                                                                                                 | scaffold_1_mRNA_2244.1           | -                           | -                               |
| GF0026487 | 1                            | 0                       | 0                           | 0 Monosaccharide transport protein (1)                              |                                                                                                                                                                                                                                                                                                                    |                                                                                                                                                                                                                                                                                                                                                                                                                                                                           | scaffold_1_mRNA_2242.1           | -                           | -                               |
| GF0026486 | 1                            | 0                       | 0                           | 0 G-type lectin S-receptor-like serine/threonine-protein kinase (1) | ATP binding [GO:0005524 molecular_function] (1); recognition of pollen [GO:0048544 biological_process] (1); protein phosphorylation [GO:0006468 biological_process] (1); protein kinase activity [GO:0004672 molecular_function] (1)                                                                               | PAN/Apple domain [IPR003609] (1); Bull-type lectin domain [IPR001480] (1); S-locus glycoprotein domain [IPR000858] (1); Serine/threonine-protein kinase, active site [IPR008271] (1); Serine/threonine/tyrosine-protein kinase, catalytic domain [IPR001245] (1); S-locus glycoprotein domain [IPR000858] (1)                                                                                                                                                             | scaffold_1_mRNA_2241.1           | -                           | -                               |
| GF0026485 | 1                            | 0                       | 0                           | 0 Peroxisomal ascorbate peroxidase (1)                              | heme binding [GO:0020037 molecular_function] (1); response to oxidative stress [GO:0006797 biological_process] (1); oxidation-reduction process [GO:0055114 biological_process] (1); peroxidase activity [GO:0004601 molecular_function] (1)                                                                       | Haem peroxidase [IPR010255] (1); Plant ascorbate peroxidase [IPR022071] (1); Peroxidase, active site [IPR019794] (1); Peroxidases haem-ligand binding site [IPR019793] (1); Haem peroxidase, plant/fungal/bacterial [IPR002016] (1)                                                                                                                                                                                                                                       | scaffold_1_mRNA_224.1            | -                           | -                               |
| GF0026484 | 1                            | 0                       | 0                           | 0 Hypothetical protein (1)                                          |                                                                                                                                                                                                                                                                                                                    |                                                                                                                                                                                                                                                                                                                                                                                                                                                                           | scaffold_1_mRNA_2239.1           | -                           | -                               |
| GF0026483 | 1                            | 0                       | 0                           | 0 Hypothetical protein (1)                                          |                                                                                                                                                                                                                                                                                                                    |                                                                                                                                                                                                                                                                                                                                                                                                                                                                           | scaffold_1_mRNA_2237.1           | -                           | -                               |
| GF0026482 | 1                            | 0                       | 0                           | 0 Hypothetical protein (1)                                          |                                                                                                                                                                                                                                                                                                                    |                                                                                                                                                                                                                                                                                                                                                                                                                                                                           | scaffold_1_mRNA_2233.1           | -                           | -                               |
| GF0026481 | 1                            | 0                       | 0                           | 0 Hypothetical protein (1)                                          | nucleic acid binding [GO:0003676 molecular_function] (1); regulation of transcription, DNA-templated [GO:0006355 biological_process] (1)                                                                                                                                                                           | Carboxy virus nucleic acid-binding protein [IPR02568] (1)                                                                                                                                                                                                                                                                                                                                                                                                                 | scaffold_1_mRNA_2232.1           | -                           | -                               |
| GF0026480 | 1                            | 0                       | 0                           | 0 Cytokinin riboside 5'-monophosphate phosphoribosyltransferase (1) |                                                                                                                                                                                                                                                                                                                    | LOG family [IPR031100] (1)                                                                                                                                                                                                                                                                                                                                                                                                                                                | scaffold_1_mRNA_2231.1           | -                           | -                               |
| GF0026479 | 1                            | 0                       | 0                           | 0 Hypothetical protein (1)                                          |                                                                                                                                                                                                                                                                                                                    |                                                                                                                                                                                                                                                                                                                                                                                                                                                                           | scaffold_1_mRNA_2223.1           | -                           | -                               |
| GF0026478 | 1                            | 0                       | 0                           | 0 Hypothetical protein (1)                                          |                                                                                                                                                                                                                                                                                                                    |                                                                                                                                                                                                                                                                                                                                                                                                                                                                           | scaffold_1_mRNA_2222.1           | -                           | -                               |
| GF0026477 | 1                            | 0                       | 0                           | 0 Hypothetical protein (1)                                          |                                                                                                                                                                                                                                                                                                                    | Retrotransposon gag domain [IPR05162] (1)                                                                                                                                                                                                                                                                                                                                                                                                                                 | scaffold_1_mRNA_2216.1           | -                           | -                               |
| GF0026476 | 1                            | 0                       | 0                           | 0 Hypothetical protein (1)                                          |                                                                                                                                                                                                                                                                                                                    |                                                                                                                                                                                                                                                                                                                                                                                                                                                                           | scaffold_1_mRNA_2215.1           | -                           | -                               |

| ID        | Num. in <i>C. clementiae</i> | Num. in <i>C. uctus</i> | Num. in <i>P. trifoliata</i> | Note                                                                   | GO                                                                                                                                                                                                                            | InterPro                                                                                                                                                                                                                                                                                                                              | Members in <i>C. clementiae</i> | Members in <i>C. uctus</i> | Members in <i>P. trifoliata</i> |
|-----------|------------------------------|-------------------------|------------------------------|------------------------------------------------------------------------|-------------------------------------------------------------------------------------------------------------------------------------------------------------------------------------------------------------------------------|---------------------------------------------------------------------------------------------------------------------------------------------------------------------------------------------------------------------------------------------------------------------------------------------------------------------------------------|---------------------------------|----------------------------|---------------------------------|
| GF0026475 | 1                            | 0                       | 0                            | 0 Hypothetical protein (1)                                             |                                                                                                                                                                                                                               |                                                                                                                                                                                                                                                                                                                                       | scaffold_1_mRNA_2208.1          | -                          | -                               |
| GF0026474 | 1                            | 0                       | 0                            | 0 Hypothetical protein (1)                                             |                                                                                                                                                                                                                               |                                                                                                                                                                                                                                                                                                                                       | scaffold_1_mRNA_2205.1          | -                          | -                               |
| GF0026473 | 1                            | 0                       | 0                            | 0 Hypothetical protein (1)                                             |                                                                                                                                                                                                                               |                                                                                                                                                                                                                                                                                                                                       | scaffold_1_mRNA_2197.1          | -                          | -                               |
| GF0026472 | 1                            | 0                       | 0                            | 0 Hypothetical protein (1)                                             |                                                                                                                                                                                                                               |                                                                                                                                                                                                                                                                                                                                       | scaffold_1_mRNA_2193.1          | -                          | -                               |
| GF0026471 | 1                            | 0                       | 0                            | 0 Protein FAR1-RELATED SEQUENCE 6 (1)                                  | zinc ion binding [GO:0008270]<br>molecular_function (1); regulation of transcription, DNA-templated [GO:0006355 biological_process] (1)                                                                                       | Zinc finger, SWIM-type [IPR007527] (1); Zinc finger, PHZ-type [IPR006564] (1); FAR1 DNA binding domain [IPR004330] (1); FHY3/FAR1 family [IPR031052] (1)                                                                                                                                                                              | scaffold_1_mRNA_2192.1          | -                          | -                               |
| GF0026470 | 1                            | 0                       | 0                            | 0 Hypothetical protein (1)                                             |                                                                                                                                                                                                                               |                                                                                                                                                                                                                                                                                                                                       | scaffold_1_mRNA_2184.1          | -                          | -                               |
| GF0026469 | 1                            | 0                       | 0                            | 0 Hypothetical protein (1)                                             |                                                                                                                                                                                                                               |                                                                                                                                                                                                                                                                                                                                       | scaffold_1_mRNA_2180.1          | -                          | -                               |
| GF0026468 | 1                            | 0                       | 0                            | 0 Hypothetical protein (1)                                             |                                                                                                                                                                                                                               |                                                                                                                                                                                                                                                                                                                                       | scaffold_1_mRNA_2177.1          | -                          | -                               |
| GF0026467 | 1                            | 0                       | 0                            | 0 Hypothetical protein (1)                                             |                                                                                                                                                                                                                               |                                                                                                                                                                                                                                                                                                                                       | scaffold_1_mRNA_2168.1          | -                          | -                               |
| GF0026466 | 1                            | 0                       | 0                            | 0 Hypothetical protein (1)                                             |                                                                                                                                                                                                                               | Reverse transcriptase domain [IPR000477] (1)                                                                                                                                                                                                                                                                                          | scaffold_1_mRNA_2166.1          | -                          | -                               |
| GF0026465 | 1                            | 0                       | 0                            | 0 Hypothetical protein (1)                                             |                                                                                                                                                                                                                               |                                                                                                                                                                                                                                                                                                                                       | scaffold_1_mRNA_2159.1          | -                          | -                               |
| GF0026464 | 1                            | 0                       | 0                            | 0 Hypothetical protein (1)                                             | nucleic acid binding [GO:0003676 molecular_function] (1)                                                                                                                                                                      | Reverse transcriptase domain [IPR000477] (1); Ribonuclease H-like domain [IPR012337] (1)                                                                                                                                                                                                                                              | scaffold_1_mRNA_2158.1          | -                          | -                               |
| GF0026463 | 1                            | 0                       | 0                            | 0 Monosaccharide transport protein (1)                                 | sigma factor antagonist activity [GO:0016989 molecular_function] (1)                                                                                                                                                          | Anti sigma-E protein RseA, N-terminal [IPR05572] (1)                                                                                                                                                                                                                                                                                  | scaffold_1_mRNA_2153.1          | -                          | -                               |
| GF0026462 | 1                            | 0                       | 0                            | 0 Protein ULTRAPETALA 2 (1)                                            |                                                                                                                                                                                                                               | Developmental regulator, ULTRAPETALA [IPR020533] (1)                                                                                                                                                                                                                                                                                  | scaffold_1_mRNA_2142.1          | -                          | -                               |
| GF0026461 | 1                            | 0                       | 0                            | 0 Hypothetical protein (1)                                             |                                                                                                                                                                                                                               |                                                                                                                                                                                                                                                                                                                                       | scaffold_1_mRNA_2137.1          | -                          | -                               |
| GF0026460 | 1                            | 0                       | 0                            | 0 Hypothetical protein (1)                                             |                                                                                                                                                                                                                               |                                                                                                                                                                                                                                                                                                                                       | scaffold_1_mRNA_2134.1          | -                          | -                               |
| GF0026459 | 1                            | 0                       | 0                            | 0 Hypothetical protein (1)                                             |                                                                                                                                                                                                                               |                                                                                                                                                                                                                                                                                                                                       | scaffold_1_mRNA_2130.1          | -                          | -                               |
| GF0026458 | 1                            | 0                       | 0                            | 0 Retrotransposon protein, putative, Ty3-gypsy subclass, expressed (1) |                                                                                                                                                                                                                               | Aspartic peptidase domain [IPR021109] (1)                                                                                                                                                                                                                                                                                             | scaffold_1_mRNA_2129.1          | -                          | -                               |
| GF0026457 | 1                            | 0                       | 0                            | 0 Hypothetical protein (1)                                             |                                                                                                                                                                                                                               |                                                                                                                                                                                                                                                                                                                                       | scaffold_1_mRNA_2128.1          | -                          | -                               |
| GF0026456 | 1                            | 0                       | 0                            | 0 Hypothetical protein (1)                                             |                                                                                                                                                                                                                               |                                                                                                                                                                                                                                                                                                                                       | scaffold_1_mRNA_2127.1          | -                          | -                               |
| GF0026455 | 1                            | 0                       | 0                            | 0 Peptidyl-prolyl cis-trans isomerase chaperonin (1)                   | protein folding [GO:0006457 biological_process] (1); protein peptidyl-prolyl isomerization [GO:0000413 biological_process] (1); peptidyl-prolyl cis-trans isomerase activity [GO:0003755 molecular_function] (1)              | Cyclophilin-type peptidyl-prolyl cis-trans isomerase domain [IPR002130] (1); Cyclophilin-like domain [IPR029000] (1); Cyclophilin-type peptidyl-prolyl cis-trans isomerase [IPR024936] (1)                                                                                                                                            | scaffold_1_mRNA_2125.1          | -                          | -                               |
| GF0026454 | 1                            | 0                       | 0                            | 0 Hypothetical protein (1)                                             |                                                                                                                                                                                                                               |                                                                                                                                                                                                                                                                                                                                       | scaffold_1_mRNA_2120.1          | -                          | -                               |
| GF0026453 | 1                            | 0                       | 0                            | 0 Hypothetical protein (1)                                             |                                                                                                                                                                                                                               |                                                                                                                                                                                                                                                                                                                                       | scaffold_1_mRNA_2105.1          | -                          | -                               |
| GF0026452 | 1                            | 0                       | 0                            | 0 Hypothetical protein (1)                                             |                                                                                                                                                                                                                               |                                                                                                                                                                                                                                                                                                                                       | scaffold_1_mRNA_2103.1          | -                          | -                               |
| GF0026451 | 1                            | 0                       | 0                            | 0 Hypothetical protein (1)                                             |                                                                                                                                                                                                                               |                                                                                                                                                                                                                                                                                                                                       | scaffold_1_mRNA_2090.1          | -                          | -                               |
| GF0026450 | 1                            | 0                       | 0                            | 0 Cytosolic riboside 5'-monophosphate ribosyltransferase (1)           |                                                                                                                                                                                                                               |                                                                                                                                                                                                                                                                                                                                       | scaffold_1_mRNA_2089.1          | -                          | -                               |
| GF0026449 | 1                            | 0                       | 0                            | 0 Hypothetical protein (1)                                             |                                                                                                                                                                                                                               |                                                                                                                                                                                                                                                                                                                                       | scaffold_1_mRNA_2088.1          | -                          | -                               |
| GF0026448 | 1                            | 0                       | 0                            | 0 Hypothetical protein (1)                                             |                                                                                                                                                                                                                               | Domain of unknown function DUF4283 [IPR025558] (1)                                                                                                                                                                                                                                                                                    | scaffold_1_mRNA_2085.1          | -                          | -                               |
| GF0026447 | 1                            | 0                       | 0                            | 0 Hypothetical protein (1)                                             |                                                                                                                                                                                                                               |                                                                                                                                                                                                                                                                                                                                       | scaffold_1_mRNA_2081.1          | -                          | -                               |
| GF0026446 | 1                            | 0                       | 0                            | 0 Hypothetical protein (1)                                             |                                                                                                                                                                                                                               |                                                                                                                                                                                                                                                                                                                                       | scaffold_1_mRNA_2073.1          | -                          | -                               |
| GF0026445 | 1                            | 0                       | 0                            | 0 Nucleosyltransferase family protein (1)                              | nucleosyltransferase activity [GO:0016779 molecular_function] (1)                                                                                                                                                             | Polymerase, nucleosyl transferase domain [IPR029341] (1); PAP25A-associated [IPR020588] (1)                                                                                                                                                                                                                                           | scaffold_1_mRNA_2070.1          | -                          | -                               |
| GF0026444 | 1                            | 0                       | 0                            | 0 Hypothetical protein (1)                                             | nucleosyltransferase activity [GO:0016779 molecular_function] (1)                                                                                                                                                             | Polymerase, nucleosyl transferase domain [IPR029341] (1); Aspartic peptidase domain [IPR021109] (1)                                                                                                                                                                                                                                   | scaffold_1_mRNA_2067.1          | -                          | -                               |
| GF0026443 | 1                            | 0                       | 0                            | 0 Hypothetical protein (1)                                             |                                                                                                                                                                                                                               | Retrotransposon gag domain [IPR005162] (1)                                                                                                                                                                                                                                                                                            | scaffold_1_mRNA_2064.1          | -                          | -                               |
| GF0026442 | 1                            | 0                       | 0                            | 0 Hypothetical protein (1)                                             | cysteine-type peptidase activity [GO:0008234 molecular_function] (1); proteolysis [GO:0006508 biological_process] (1)                                                                                                         | Upl protease family, C-terminal catalytic domain [IPR003653] (1)                                                                                                                                                                                                                                                                      | scaffold_1_mRNA_2061.1          | -                          | -                               |
| GF0026441 | 1                            | 0                       | 0                            | 0 Hypothetical protein (1)                                             |                                                                                                                                                                                                                               |                                                                                                                                                                                                                                                                                                                                       | scaffold_1_mRNA_2056.1          | -                          | -                               |
| GF0026440 | 1                            | 0                       | 0                            | 0 Monosaccharide transport protein (1)                                 |                                                                                                                                                                                                                               |                                                                                                                                                                                                                                                                                                                                       | scaffold_1_mRNA_2053.1          | -                          | -                               |
| GF0026439 | 1                            | 0                       | 0                            | 0 Hypothetical protein (1)                                             |                                                                                                                                                                                                                               |                                                                                                                                                                                                                                                                                                                                       | scaffold_1_mRNA_2051.1          | -                          | -                               |
| GF0026438 | 1                            | 0                       | 0                            | 0 Hypothetical protein (1)                                             |                                                                                                                                                                                                                               | Protein of unknown function DUF2921 [IPR021319] (1)                                                                                                                                                                                                                                                                                   | scaffold_1_mRNA_2046.1          | -                          | -                               |
| GF0026437 | 1                            | 0                       | 0                            | 0 Hypothetical protein (1)                                             |                                                                                                                                                                                                                               |                                                                                                                                                                                                                                                                                                                                       | scaffold_1_mRNA_2030.1          | -                          | -                               |
| GF0026436 | 1                            | 0                       | 0                            | 0 Hypothetical protein (1)                                             | nucleic acid binding [GO:0003676 molecular_function] (1)                                                                                                                                                                      | Ribonuclease H-like domain [IPR012337] (1)                                                                                                                                                                                                                                                                                            | scaffold_1_mRNA_2024.1          | -                          | -                               |
| GF0026435 | 1                            | 0                       | 0                            | 0 Hypothetical protein (1)                                             |                                                                                                                                                                                                                               |                                                                                                                                                                                                                                                                                                                                       | scaffold_1_mRNA_2020.1          | -                          | -                               |
| GF0026434 | 1                            | 0                       | 0                            | 0 Hypothetical protein (1)                                             |                                                                                                                                                                                                                               |                                                                                                                                                                                                                                                                                                                                       | scaffold_1_mRNA_2019.1          | -                          | -                               |
| GF0026433 | 1                            | 0                       | 0                            | 0 Hypothetical protein (1)                                             |                                                                                                                                                                                                                               | Reverse transcriptase domain [IPR000477] (1)                                                                                                                                                                                                                                                                                          | scaffold_1_mRNA_2007.1          | -                          | -                               |
| GF0026432 | 1                            | 0                       | 0                            | 0 Hypothetical protein (1)                                             |                                                                                                                                                                                                                               |                                                                                                                                                                                                                                                                                                                                       | scaffold_1_mRNA_2005.1          | -                          | -                               |
| GF0026431 | 1                            | 0                       | 0                            | 0 Hypothetical protein (1)                                             |                                                                                                                                                                                                                               |                                                                                                                                                                                                                                                                                                                                       | scaffold_1_mRNA_2003.1          | -                          | -                               |
| GF0026430 | 1                            | 0                       | 0                            | 0 Hypothetical protein (1)                                             |                                                                                                                                                                                                                               |                                                                                                                                                                                                                                                                                                                                       | scaffold_1_mRNA_1997.1          | -                          | -                               |
| GF0026429 | 1                            | 0                       | 0                            | 0 Hypothetical protein (1)                                             |                                                                                                                                                                                                                               |                                                                                                                                                                                                                                                                                                                                       | scaffold_1_mRNA_1994.1          | -                          | -                               |
| GF0026428 | 1                            | 0                       | 0                            | 0 Hypothetical protein (1)                                             | nucleic acid binding [GO:0003676 molecular_function] (1)                                                                                                                                                                      | Ribonuclease H-like domain [IPR012337] (1); Leucine-rich repeat domain, L domain-like [IPR032675] (1)                                                                                                                                                                                                                                 | scaffold_1_mRNA_1988.1          | -                          | -                               |
| GF0026427 | 1                            | 0                       | 0                            | 0 Monosaccharide transport protein (1)                                 |                                                                                                                                                                                                                               |                                                                                                                                                                                                                                                                                                                                       | scaffold_1_mRNA_1982.1          | -                          | -                               |
| GF0026426 | 1                            | 0                       | 0                            | 0 Hypothetical protein (1)                                             |                                                                                                                                                                                                                               |                                                                                                                                                                                                                                                                                                                                       | scaffold_1_mRNA_1979.1          | -                          | -                               |
| GF0026425 | 1                            | 0                       | 0                            | 0 Hypothetical protein (1)                                             |                                                                                                                                                                                                                               |                                                                                                                                                                                                                                                                                                                                       | scaffold_1_mRNA_1977.1          | -                          | -                               |
| GF0026424 | 1                            | 0                       | 0                            | 0 Hypothetical protein (1)                                             |                                                                                                                                                                                                                               |                                                                                                                                                                                                                                                                                                                                       | scaffold_1_mRNA_1972.1          | -                          | -                               |
| GF0026423 | 1                            | 0                       | 0                            | 0 Disease resistance protein family, putative isoform 2 (1)            | ADP binding [GO:0043531 molecular_function] (1)                                                                                                                                                                               | P-loop containing nucleoside triphosphate hydrolase [IPR027417] (1); NB-ARC [IPR002182] (1); Leucine-rich repeat domain, L domain-like [IPR032675] (1); Winged helix-turn-helix DNA-binding domain [IPR011991] (1)                                                                                                                    | scaffold_1_mRNA_1971.1          | -                          | -                               |
| GF0026422 | 1                            | 0                       | 0                            | 0 Hypothetical protein (1)                                             | ADP binding [GO:0043531 molecular_function] (1)                                                                                                                                                                               | NB-ARC [IPR002182] (1); Winged helix-turn-helix DNA-binding domain [IPR011991] (1)                                                                                                                                                                                                                                                    | scaffold_1_mRNA_1962.1          | -                          | -                               |
| GF0026421 | 1                            | 0                       | 0                            | 0 Hypothetical protein (1)                                             |                                                                                                                                                                                                                               |                                                                                                                                                                                                                                                                                                                                       | scaffold_1_mRNA_1961.1          | -                          | -                               |
| GF0026420 | 1                            | 0                       | 0                            | 0 Cytosolic riboside 5'-monophosphate ribosyltransferase (1)           |                                                                                                                                                                                                                               | LOG family [IPR031100] (1)                                                                                                                                                                                                                                                                                                            | scaffold_1_mRNA_1960.1          | -                          | -                               |
| GF0026419 | 1                            | 0                       | 0                            | 0 Hypothetical protein (1)                                             |                                                                                                                                                                                                                               |                                                                                                                                                                                                                                                                                                                                       | scaffold_1_mRNA_1953.1          | -                          | -                               |
| GF0026418 | 1                            | 0                       | 0                            | 0 Hypothetical protein (1)                                             |                                                                                                                                                                                                                               |                                                                                                                                                                                                                                                                                                                                       | scaffold_1_mRNA_1952.1          | -                          | -                               |
| GF0026417 | 1                            | 0                       | 0                            | 0 Hypothetical protein (1)                                             |                                                                                                                                                                                                                               |                                                                                                                                                                                                                                                                                                                                       | scaffold_1_mRNA_1946.1          | -                          | -                               |
| GF0026416 | 1                            | 0                       | 0                            | 0 Hypothetical protein (1)                                             |                                                                                                                                                                                                                               |                                                                                                                                                                                                                                                                                                                                       | scaffold_1_mRNA_1943.1          | -                          | -                               |
| GF0026415 | 1                            | 0                       | 0                            | 0 Hypothetical protein (1)                                             |                                                                                                                                                                                                                               |                                                                                                                                                                                                                                                                                                                                       | scaffold_1_mRNA_1942.1          | -                          | -                               |
| GF0026414 | 1                            | 0                       | 0                            | 0 Hypothetical protein (1)                                             |                                                                                                                                                                                                                               |                                                                                                                                                                                                                                                                                                                                       | scaffold_1_mRNA_1941.1          | -                          | -                               |
| GF0026413 | 1                            | 0                       | 0                            | 0 Hypothetical protein (1)                                             |                                                                                                                                                                                                                               |                                                                                                                                                                                                                                                                                                                                       | scaffold_1_mRNA_1940.1          | -                          | -                               |
| GF0026412 | 1                            | 0                       | 0                            | 0 Nodulin family protein (1)                                           |                                                                                                                                                                                                                               | Fliellin family [IPR027705] (1); Band 7 domain [IPR01107] (1)                                                                                                                                                                                                                                                                         | scaffold_1_mRNA_194.1           | -                          | -                               |
| GF0026411 | 1                            | 0                       | 0                            | 0 Hypothetical protein (1)                                             |                                                                                                                                                                                                                               |                                                                                                                                                                                                                                                                                                                                       | scaffold_1_mRNA_1938.1          | -                          | -                               |
| GF0026410 | 1                            | 0                       | 0                            | 0 Hypothetical protein (1)                                             |                                                                                                                                                                                                                               |                                                                                                                                                                                                                                                                                                                                       | scaffold_1_mRNA_1935.1          | -                          | -                               |
| GF0026409 | 1                            | 0                       | 0                            | 0 Hypothetical protein (1)                                             |                                                                                                                                                                                                                               |                                                                                                                                                                                                                                                                                                                                       | scaffold_1_mRNA_1933.1          | -                          | -                               |
| GF0026408 | 1                            | 0                       | 0                            | 0 Hypothetical protein (1)                                             |                                                                                                                                                                                                                               |                                                                                                                                                                                                                                                                                                                                       | scaffold_1_mRNA_1930.1          | -                          | -                               |
| GF0026407 | 1                            | 0                       | 0                            | 0 Ribosomal protein L11 methyltransferase (1)                          |                                                                                                                                                                                                                               | S-adenosyl-L-methionine-dependent methyltransferase [IPR029063] (1)<br>NB-ARC [IPR002182] (1); P-loop containing nucleoside triphosphate hydrolase [IPR027417] (1); Leucine-rich repeat domain, L domain-like [IPR032675] (1); Winged helix-turn-helix DNA-binding domain [IPR011991] (1); Ribonuclease H-like domain [IPR012337] (1) | scaffold_1_mRNA_1924.1          | -                          | -                               |
| GF0026406 | 1                            | 0                       | 0                            | 0 Disease resistance protein RPP13 variant (1)                         | nucleic acid binding [GO:0003676 molecular_function] (1); ADP binding [GO:0043531 molecular_function] (1)                                                                                                                     | NB-ARC [IPR002182] (1); P-loop containing nucleoside triphosphate hydrolase [IPR027417] (1); Leucine-rich repeat domain, L domain-like [IPR032675] (1); Winged helix-turn-helix DNA-binding domain [IPR011991] (1); Ribonuclease H-like domain [IPR012337] (1)                                                                        | scaffold_1_mRNA_1923.1          | -                          | -                               |
| GF0026405 | 1                            | 0                       | 0                            | 0 Hypothetical protein (1)                                             |                                                                                                                                                                                                                               |                                                                                                                                                                                                                                                                                                                                       | scaffold_1_mRNA_1916.1          | -                          | -                               |
| GF0026404 | 1                            | 0                       | 0                            | 0 Hypothetical protein (1)                                             |                                                                                                                                                                                                                               |                                                                                                                                                                                                                                                                                                                                       | scaffold_1_mRNA_1900.1          | -                          | -                               |
| GF0026403 | 1                            | 0                       | 0                            | 0 Hypothetical protein (1)                                             |                                                                                                                                                                                                                               |                                                                                                                                                                                                                                                                                                                                       | scaffold_1_mRNA_190.1           | -                          | -                               |
| GF0026402 | 1                            | 0                       | 0                            | 0 Hypothetical protein (1)                                             |                                                                                                                                                                                                                               |                                                                                                                                                                                                                                                                                                                                       | scaffold_1_mRNA_1896.1          | -                          | -                               |
| GF0026401 | 1                            | 0                       | 0                            | 0 Hypothetical protein (1)                                             |                                                                                                                                                                                                                               |                                                                                                                                                                                                                                                                                                                                       | scaffold_1_mRNA_189.1           | -                          | -                               |
| GF0026400 | 1                            | 0                       | 0                            | 0 Hypothetical protein (1)                                             | zinc ion binding [GO:0008270 molecular_function] (1); metabolic process [GO:0008152 biological_process] (1); hydrolase activity [GO:0016787 molecular_function] (1); nucleic acid binding [GO:0003676 molecular_function] (1) | Alpha/Beta hydrolase fold [IPR029058] (1); Viral movement protein [IPR028919] (1); Ribonuclease H-like domain [IPR012337] (1); Alpha/beta hydrolase fold 3 [IPR03094] (1); Exonuclease, RNase T/DNA polymerase III [IPR013520] (1); Zinc finger, CCHC-type [IPR001878] (1)                                                            | scaffold_1_mRNA_1883.1          | -                          | -                               |
| GF0026399 | 1                            | 0                       | 0                            | 0 Hypothetical protein (1)                                             |                                                                                                                                                                                                                               |                                                                                                                                                                                                                                                                                                                                       | scaffold_1_mRNA_1882.1          | -                          | -                               |
| GF0026398 | 1                            | 0                       | 0                            | 0 Hypothetical protein (1)                                             |                                                                                                                                                                                                                               |                                                                                                                                                                                                                                                                                                                                       | scaffold_1_mRNA_1873.1          | -                          | -                               |
| GF0026397 | 1                            | 0                       | 0                            | 0 Hypothetical protein (1)                                             |                                                                                                                                                                                                                               |                                                                                                                                                                                                                                                                                                                                       | scaffold_1_mRNA_1871.1          | -                          | -                               |
| GF0026396 | 1                            | 0                       | 0                            | 0 Hypothetical protein (1)                                             |                                                                                                                                                                                                                               | Chromo domain [IPR023780] (1); Chromo domain-like [IPR016197] (1); Chromo/chromo shadow domain [IPR000953] (1)                                                                                                                                                                                                                        | scaffold_1_mRNA_1863.1          | -                          | -                               |

| ID        | Num. in <i>C. celeratae</i> | Num. in <i>C. uchiha</i> | Num. in <i>P. trifoliata</i> | Note                                                           | GO                                                                                                                                                                                                                                  | InterPro                                                                                                                                                                                                                                | Members in <i>C. celeratae</i> | Members in <i>C. uchiha</i> | Members in <i>P. trifoliata</i> |
|-----------|-----------------------------|--------------------------|------------------------------|----------------------------------------------------------------|-------------------------------------------------------------------------------------------------------------------------------------------------------------------------------------------------------------------------------------|-----------------------------------------------------------------------------------------------------------------------------------------------------------------------------------------------------------------------------------------|--------------------------------|-----------------------------|---------------------------------|
| GF0026395 | 1                           | 0                        | 0                            | 0 Hypothetical protein (1)                                     |                                                                                                                                                                                                                                     |                                                                                                                                                                                                                                         | scaffold_1_mRNA_1862.1         | -                           | -                               |
| GF0026394 | 1                           | 0                        | 0                            | 0 Hypothetical protein (1)                                     | nucleic acid binding [GO:0003676 molecular_function] (1); zinc ion binding [GO:0008270 molecular_function] (1)                                                                                                                      | Endonuclease/exonuclease/phosphatase [IPR001351] (1); Zinc knuckle CXXCXXHXXC [IPR053836] (1); Zinc finger, CCHC-type [IPR001878] (1); Domain of unknown function DUF4283 [IPR025558] (1); Ribonuclease H-like domain [IPR012337] (1)   | scaffold_1_mRNA_1858.1         | -                           | -                               |
| GF0026393 | 1                           | 0                        | 0                            | 0 Hypothetical protein (1)                                     | nucleic acid binding [GO:0003676 molecular_function] (1); protein dimerization activity [GO:0046983 molecular_function] (1)                                                                                                         | HAT, C-terminal dimerization domain [IPR008906] (1); Ribonuclease H-like domain [IPR012337] (1)                                                                                                                                         | scaffold_1_mRNA_1855.1         | -                           | -                               |
| GF0026392 | 1                           | 0                        | 0                            | 0 Hypothetical protein (1)                                     |                                                                                                                                                                                                                                     |                                                                                                                                                                                                                                         | scaffold_1_mRNA_1853.1         | -                           | -                               |
| GF0026391 | 1                           | 0                        | 0                            | 0 Hypothetical protein (1)                                     | nucleic acid binding [GO:0003676 molecular_function] (1); zinc ion binding [GO:0008270 molecular_function] (1)                                                                                                                      | Zinc finger, CCHC-type [IPR001878] (1); Zinc finger, PMZ-type [IPR006564] (1); Zinc finger, SWIM-type [IPR007527] (1)                                                                                                                   | scaffold_1_mRNA_1851.1         | -                           | -                               |
| GF0026390 | 1                           | 0                        | 0                            | 0 Mutator-like transposase (1)                                 |                                                                                                                                                                                                                                     | MULE transposase domain [IPR018289] (1); Transposase, MuDR, plant [IPR004352] (1)                                                                                                                                                       | scaffold_1_mRNA_1850.1         | -                           | -                               |
| GF0026389 | 1                           | 0                        | 0                            | 0 Hypothetical protein (1)                                     |                                                                                                                                                                                                                                     |                                                                                                                                                                                                                                         | scaffold_1_mRNA_1847.1         | -                           | -                               |
| GF0026388 | 1                           | 0                        | 0                            | 0 Hypothetical protein (1)                                     |                                                                                                                                                                                                                                     |                                                                                                                                                                                                                                         | scaffold_1_mRNA_1846.1         | -                           | -                               |
| GF0026387 | 1                           | 0                        | 0                            | 0 Hypothetical protein (1)                                     |                                                                                                                                                                                                                                     |                                                                                                                                                                                                                                         | scaffold_1_mRNA_1839.1         | -                           | -                               |
| GF0026386 | 1                           | 0                        | 0                            | 0 Hypothetical protein (1)                                     |                                                                                                                                                                                                                                     |                                                                                                                                                                                                                                         | scaffold_1_mRNA_1832.1         | -                           | -                               |
| GF0026385 | 1                           | 0                        | 0                            | 0 Hypothetical protein (1)                                     |                                                                                                                                                                                                                                     |                                                                                                                                                                                                                                         | scaffold_1_mRNA_1829.1         | -                           | -                               |
| GF0026384 | 1                           | 0                        | 0                            | 0 Cytokinin riboside 5'-monophosphate phosphoribohydrolase (1) |                                                                                                                                                                                                                                     |                                                                                                                                                                                                                                         | scaffold_1_mRNA_1827.1         | -                           | -                               |
| GF0026383 | 1                           | 0                        | 0                            | 0 Hypothetical protein (1)                                     |                                                                                                                                                                                                                                     |                                                                                                                                                                                                                                         | scaffold_1_mRNA_1826.1         | -                           | -                               |
| GF0026382 | 1                           | 0                        | 0                            | 0 Hypothetical protein (1)                                     |                                                                                                                                                                                                                                     |                                                                                                                                                                                                                                         | scaffold_1_mRNA_1825.1         | -                           | -                               |
| GF0026381 | 1                           | 0                        | 0                            | 0 Hypothetical protein (1)                                     |                                                                                                                                                                                                                                     |                                                                                                                                                                                                                                         | scaffold_1_mRNA_1824.1         | -                           | -                               |
| GF0026380 | 1                           | 0                        | 0                            | 0 Hypothetical protein (1)                                     | zinc ion binding [GO:0008270 molecular_function] (1); nucleic acid binding [GO:0003676 molecular_function] (1)                                                                                                                      | Eukaryotic translation initiation factor 3 subunit G, N-terminal [IPR024675] (1); Zinc finger, CCHC-type [IPR001878] (1)                                                                                                                | scaffold_1_mRNA_1809.1         | -                           | -                               |
| GF0026379 | 1                           | 0                        | 0                            | 0 Hypothetical protein (1)                                     | zinc ion binding [GO:0008270 molecular_function] (1); nucleic acid binding [GO:0003676 molecular_function] (1)                                                                                                                      | Zinc finger, CCHC-type [IPR001878] (1)                                                                                                                                                                                                  | scaffold_1_mRNA_1808.1         | -                           | -                               |
| GF0026378 | 1                           | 0                        | 0                            | 0 Hypothetical protein (1)                                     | regulation of transcription, DNA-templated [GO:0006355 biological_process] (1); zinc ion binding [GO:0008270 molecular_function] (1); nucleic acid binding [GO:0003676 molecular_function] (1)                                      | FHY3/FAR1 family [IPR031052] (1); Zinc finger, CCHC-type [IPR001878] (1); Zinc finger, PMZ-type [IPR006564] (1); MULE transposase domain [IPR018289] (1); Zinc finger, SWIM-type [IPR007527] (1)                                        | scaffold_1_mRNA_1805.1         | -                           | -                               |
| GF0026377 | 1                           | 0                        | 0                            | 0 FAR1 DNA-binding domain protein (1)                          | regulation of transcription, DNA-templated [GO:0006355 biological_process] (1)                                                                                                                                                      | FHY3/FAR1 family [IPR031052] (1); FAR1 DNA binding domain [IPR04330] (1)                                                                                                                                                                | scaffold_1_mRNA_1804.1         | -                           | -                               |
| GF0026376 | 1                           | 0                        | 0                            | 0 Cytokinin riboside 5'-monophosphate phosphoribohydrolase (1) |                                                                                                                                                                                                                                     |                                                                                                                                                                                                                                         | scaffold_1_mRNA_1801.1         | -                           | -                               |
| GF0026375 | 1                           | 0                        | 0                            | 0 Elongator complex protein 4 (1)                              | Elongator holoenzyme complex [GO:0035588 cellular_component] (1)                                                                                                                                                                    | Elongator complex protein 4 [IPR008728] (1)                                                                                                                                                                                             | scaffold_1_mRNA_1800.1         | -                           | -                               |
| GF0026374 | 1                           | 0                        | 0                            | 0 Hypothetical protein (1)                                     |                                                                                                                                                                                                                                     |                                                                                                                                                                                                                                         | scaffold_1_mRNA_181.1          | -                           | -                               |
| GF0026373 | 1                           | 0                        | 0                            | 0 Hypothetical protein (1)                                     | transferase activity, transferring acyl groups other than amino-acyl groups [GO:0016747 molecular_function] (1)                                                                                                                     | Transferase [IPR003480] (1); Transposase-associated domain [IPR029480] (1); Probable transposase, Pua-In-Spm, plant [IPR004252] (1)                                                                                                     | scaffold_1_mRNA_1797.1         | -                           | -                               |
| GF0026372 | 1                           | 0                        | 0                            | 0 Hypothetical protein (1)                                     |                                                                                                                                                                                                                                     |                                                                                                                                                                                                                                         | scaffold_1_mRNA_1796.1         | -                           | -                               |
| GF0026371 | 1                           | 0                        | 0                            | 0 Hypothetical protein (1)                                     |                                                                                                                                                                                                                                     |                                                                                                                                                                                                                                         | scaffold_1_mRNA_1795.1         | -                           | -                               |
| GF0026370 | 1                           | 0                        | 0                            | 0 Hypothetical protein (1)                                     |                                                                                                                                                                                                                                     |                                                                                                                                                                                                                                         | scaffold_1_mRNA_1794.1         | -                           | -                               |
| GF0026369 | 1                           | 0                        | 0                            | 0 Hypothetical protein (1)                                     |                                                                                                                                                                                                                                     |                                                                                                                                                                                                                                         | scaffold_1_mRNA_1793.1         | -                           | -                               |
| GF0026368 | 1                           | 0                        | 0                            | 0 Hypothetical protein (1)                                     |                                                                                                                                                                                                                                     |                                                                                                                                                                                                                                         | scaffold_1_mRNA_1788.1         | -                           | -                               |
| GF0026367 | 1                           | 0                        | 0                            | 0 Hypothetical protein (1)                                     |                                                                                                                                                                                                                                     |                                                                                                                                                                                                                                         | scaffold_1_mRNA_1785.1         | -                           | -                               |
| GF0026366 | 1                           | 0                        | 0                            | 0 Hypothetical protein (1)                                     |                                                                                                                                                                                                                                     |                                                                                                                                                                                                                                         | scaffold_1_mRNA_1784.1         | -                           | -                               |
| GF0026365 | 1                           | 0                        | 0                            | 0 Cytokinin riboside 5'-monophosphate phosphoribohydrolase (1) |                                                                                                                                                                                                                                     |                                                                                                                                                                                                                                         | scaffold_1_mRNA_1783.1         | -                           | -                               |
| GF0026364 | 1                           | 0                        | 0                            | 0 Hypothetical protein (1)                                     | zinc ion binding [GO:0008270 molecular_function] (1)                                                                                                                                                                                | Zinc finger, PMZ-type [IPR006564] (1)                                                                                                                                                                                                   | scaffold_1_mRNA_1778.1         | -                           | -                               |
| GF0026363 | 1                           | 0                        | 0                            | 0 Hypothetical protein (1)                                     | proteolysis [GO:0006508 biological_process] (1); aspartic-type endopeptidase activity [GO:0004190 molecular_function] (1)                                                                                                           | Aspartic peptidase, active site [IPR001969] (1); Peptidase A2A, retroviral, catalytic [IPR010995] (1); Viral movement protein [IPR028919] (1)                                                                                           | scaffold_1_mRNA_1774.1         | -                           | -                               |
| GF0026362 | 1                           | 0                        | 0                            | 0 Hypothetical protein (1)                                     | nucleic acid binding [GO:0003676 molecular_function] (1)                                                                                                                                                                            | Reverse transcriptase domain [IPR000477] (1); Reverse transcriptase zinc-binding domain [IPR029660] (1); Ribonuclease H-like domain [IPR012337] (1)                                                                                     | scaffold_1_mRNA_1773.1         | -                           | -                               |
| GF0026361 | 1                           | 0                        | 0                            | 0 Hypothetical protein (1)                                     |                                                                                                                                                                                                                                     |                                                                                                                                                                                                                                         | scaffold_1_mRNA_1768.1         | -                           | -                               |
| GF0026360 | 1                           | 0                        | 0                            | 0 Hypothetical protein (1)                                     | nucleic acid binding [GO:0003676 molecular_function] (1); zinc ion binding [GO:0008270 molecular_function] (1)                                                                                                                      | Zinc finger, CCHC-type [IPR001878] (1)                                                                                                                                                                                                  | scaffold_1_mRNA_1767.1         | -                           | -                               |
| GF0026359 | 1                           | 0                        | 0                            | 0 Cytokinin riboside 5'-monophosphate phosphoribohydrolase (1) |                                                                                                                                                                                                                                     |                                                                                                                                                                                                                                         | scaffold_1_mRNA_1763.1         | -                           | -                               |
| GF0026358 | 1                           | 0                        | 0                            | 0 Hypothetical protein (1)                                     |                                                                                                                                                                                                                                     |                                                                                                                                                                                                                                         | scaffold_1_mRNA_1760.1         | -                           | -                               |
| GF0026357 | 1                           | 0                        | 0                            | 0 Hypothetical protein (1)                                     |                                                                                                                                                                                                                                     |                                                                                                                                                                                                                                         | scaffold_1_mRNA_1759.1         | -                           | -                               |
| GF0026356 | 1                           | 0                        | 0                            | 0 Hypothetical protein (1)                                     |                                                                                                                                                                                                                                     |                                                                                                                                                                                                                                         | scaffold_1_mRNA_1756.1         | -                           | -                               |
| GF0026355 | 1                           | 0                        | 0                            | 0 Hypothetical protein (1)                                     |                                                                                                                                                                                                                                     | Retrotransposon gag domain [IPR005162] (1)                                                                                                                                                                                              | scaffold_1_mRNA_1755.1         | -                           | -                               |
| GF0026354 | 1                           | 0                        | 0                            | 0 Hypothetical protein (1)                                     |                                                                                                                                                                                                                                     |                                                                                                                                                                                                                                         | scaffold_1_mRNA_1754.1         | -                           | -                               |
| GF0026353 | 1                           | 0                        | 0                            | 0 Hypothetical protein (1)                                     |                                                                                                                                                                                                                                     |                                                                                                                                                                                                                                         | scaffold_1_mRNA_175.1          | -                           | -                               |
| GF0026352 | 1                           | 0                        | 0                            | 0 Hypothetical protein (1)                                     |                                                                                                                                                                                                                                     |                                                                                                                                                                                                                                         | scaffold_1_mRNA_1749.1         | -                           | -                               |
| GF0026351 | 1                           | 0                        | 0                            | 0 Hypothetical protein (1)                                     |                                                                                                                                                                                                                                     |                                                                                                                                                                                                                                         | scaffold_1_mRNA_1747.1         | -                           | -                               |
| GF0026350 | 1                           | 0                        | 0                            | 0 Hypothetical protein (1)                                     |                                                                                                                                                                                                                                     |                                                                                                                                                                                                                                         | scaffold_1_mRNA_1744.1         | -                           | -                               |
| GF0026349 | 1                           | 0                        | 0                            | 0 Hypothetical protein (1)                                     |                                                                                                                                                                                                                                     |                                                                                                                                                                                                                                         | scaffold_1_mRNA_1741.1         | -                           | -                               |
| GF0026348 | 1                           | 0                        | 0                            | 0 Hypothetical protein (1)                                     |                                                                                                                                                                                                                                     |                                                                                                                                                                                                                                         | scaffold_1_mRNA_1738.1         | -                           | -                               |
| GF0026347 | 1                           | 0                        | 0                            | 0 Sesquiterpene synthase (1)                                   | lyase activity [GO:0016820 molecular_function] (1); terpene synthase activity [GO:0010333 molecular_function] (1); magnesium ion binding [GO:0000287 molecular_function] (1); metabolic process [GO:0008152 biological_process] (1) | Isoprenoid synthase domain [IPR008949] (1); Terpenoid cyclase-protein prenyltransferase alpha-alpha teroid [IPR008930] (1); Terpene synthase, N-terminal domain [IPR001906] (1); Terpene synthase, metal-binding domain [IPR005630] (1) | scaffold_1_mRNA_1722.1         | -                           | -                               |
| GF0026346 | 1                           | 0                        | 0                            | 0 Hypothetical protein (1)                                     |                                                                                                                                                                                                                                     |                                                                                                                                                                                                                                         | scaffold_1_mRNA_1719.1         | -                           | -                               |
| GF0026345 | 1                           | 0                        | 0                            | 0 Hypothetical protein (1)                                     |                                                                                                                                                                                                                                     |                                                                                                                                                                                                                                         | scaffold_1_mRNA_1710.1         | -                           | -                               |
| GF0026344 | 1                           | 0                        | 0                            | 0 Hypothetical protein (1)                                     |                                                                                                                                                                                                                                     |                                                                                                                                                                                                                                         | scaffold_1_mRNA_1691.1         | -                           | -                               |
| GF0026343 | 1                           | 0                        | 0                            | 0 Hypothetical protein (1)                                     | protein dimerization activity [GO:0046983 molecular_function] (1)                                                                                                                                                                   | Domain of unknown function DUF4371 [IPR025398] (1); HAT, C-terminal dimerization domain [IPR008906] (1)                                                                                                                                 | scaffold_1_mRNA_1690.1         | -                           | -                               |
| GF0026342 | 1                           | 0                        | 0                            | 0 Hypothetical protein (1)                                     |                                                                                                                                                                                                                                     |                                                                                                                                                                                                                                         | scaffold_1_mRNA_1688.1         | -                           | -                               |
| GF0026341 | 1                           | 0                        | 0                            | 0 Hypothetical protein (1)                                     |                                                                                                                                                                                                                                     |                                                                                                                                                                                                                                         | scaffold_1_mRNA_1686.1         | -                           | -                               |
| GF0026340 | 1                           | 0                        | 0                            | 0 Cytokinin riboside 5'-monophosphate phosphoribohydrolase (1) |                                                                                                                                                                                                                                     |                                                                                                                                                                                                                                         | scaffold_1_mRNA_1675.1         | -                           | -                               |
| GF0026339 | 1                           | 0                        | 0                            | 0 Hypothetical protein (1)                                     |                                                                                                                                                                                                                                     |                                                                                                                                                                                                                                         | scaffold_1_mRNA_1674.1         | -                           | -                               |
| GF0026338 | 1                           | 0                        | 0                            | 0 Cytokinin riboside 5'-monophosphate phosphoribohydrolase (1) |                                                                                                                                                                                                                                     |                                                                                                                                                                                                                                         | scaffold_1_mRNA_1666.1         | -                           | -                               |
| GF0026337 | 1                           | 0                        | 0                            | 0 Hypothetical protein (1)                                     |                                                                                                                                                                                                                                     |                                                                                                                                                                                                                                         | scaffold_1_mRNA_1665.1         | -                           | -                               |
| GF0026336 | 1                           | 0                        | 0                            | 0 Hypothetical protein (1)                                     |                                                                                                                                                                                                                                     |                                                                                                                                                                                                                                         | scaffold_1_mRNA_1664.1         | -                           | -                               |
| GF0026335 | 1                           | 0                        | 0                            | 0 Hypothetical protein (1)                                     |                                                                                                                                                                                                                                     |                                                                                                                                                                                                                                         | scaffold_1_mRNA_1661.1         | -                           | -                               |
| GF0026334 | 1                           | 0                        | 0                            | 0 Hypothetical protein (1)                                     |                                                                                                                                                                                                                                     |                                                                                                                                                                                                                                         | scaffold_1_mRNA_1660.1         | -                           | -                               |
| GF0026333 | 1                           | 0                        | 0                            | 0 Hypothetical protein (1)                                     |                                                                                                                                                                                                                                     |                                                                                                                                                                                                                                         | scaffold_1_mRNA_1659.1         | -                           | -                               |
| GF0026332 | 1                           | 0                        | 0                            | 0 Hypothetical protein (1)                                     |                                                                                                                                                                                                                                     |                                                                                                                                                                                                                                         | scaffold_1_mRNA_1657.1         | -                           | -                               |
| GF0026331 | 1                           | 0                        | 0                            | 0 Hypothetical protein (1)                                     |                                                                                                                                                                                                                                     |                                                                                                                                                                                                                                         | scaffold_1_mRNA_1655.1         | -                           | -                               |
| GF0026330 | 1                           | 0                        | 0                            | 0 Hypothetical protein (1)                                     |                                                                                                                                                                                                                                     |                                                                                                                                                                                                                                         | scaffold_1_mRNA_1654.1         | -                           | -                               |
| GF0026329 | 1                           | 0                        | 0                            | 0 60S ribosomal protein L14 (1)                                | ribosome [GO:0005840 cellular_component] (1); structural constituent of ribosome [GO:0003735 molecular_function] (1); intracellular translation [GO:0006412 biological_process] (1)                                                 | Translation protein SH3-like domain [IPR008991] (1); Ribosomal protein L14e domain [IPR007784] (1); Ribosomal protein L2 domain 2 [IPR014722] (1)                                                                                       | scaffold_1_mRNA_1652.1         | -                           | -                               |
| GF0026328 | 1                           | 0                        | 0                            | 0 Hypothetical protein (1)                                     |                                                                                                                                                                                                                                     |                                                                                                                                                                                                                                         | scaffold_1_mRNA_1651.1         | -                           | -                               |
| GF0026327 | 1                           | 0                        | 0                            | 0 Hypothetical protein (1)                                     |                                                                                                                                                                                                                                     |                                                                                                                                                                                                                                         | scaffold_1_mRNA_1649.1         | -                           | -                               |
| GF0026326 | 1                           | 0                        | 0                            | 0 Putative retroelement pol polyprotein (1)                    |                                                                                                                                                                                                                                     |                                                                                                                                                                                                                                         | scaffold_1_mRNA_1646.1         | -                           | -                               |
| GF0026325 | 1                           | 0                        | 0                            | 0 Hypothetical protein (1)                                     |                                                                                                                                                                                                                                     |                                                                                                                                                                                                                                         | scaffold_1_mRNA_1636.1         | -                           | -                               |
| GF0026324 | 1                           | 0                        | 0                            | 0 Cytokinin riboside 5'-monophosphate phosphoribohydrolase (1) |                                                                                                                                                                                                                                     |                                                                                                                                                                                                                                         | scaffold_1_mRNA_1634.1         | -                           | -                               |

| ID        | Num in <i>C. clementiae</i> | Num in <i>C. uchiha</i> | Num in <i>P. trifoliata</i> | Note                                                        | GO                                                                                                                                                                                                                                                                                                                                     | InterPro                                                                                                                                                                                                                                                                                                                                                                      | Members in <i>C. clementiae</i> | Members in <i>C. uchiha</i> | Members in <i>P. trifoliata</i> |
|-----------|-----------------------------|-------------------------|-----------------------------|-------------------------------------------------------------|----------------------------------------------------------------------------------------------------------------------------------------------------------------------------------------------------------------------------------------------------------------------------------------------------------------------------------------|-------------------------------------------------------------------------------------------------------------------------------------------------------------------------------------------------------------------------------------------------------------------------------------------------------------------------------------------------------------------------------|---------------------------------|-----------------------------|---------------------------------|
| GF0026323 | 1                           | 0                       | 0                           | 0 Ras-related protein RABA6a (1)                            | GTPase activity [GO:0003924 molecular_function] (1); GTP binding [GO:0005525 molecular_function] (1)                                                                                                                                                                                                                                   | Small GTPase superfamily [IPR001806] (1); P-loop containing nucleoside triphosphate hydrolase [IPR021417] (1); Small GTP-binding protein domain [IPR005225] (1)                                                                                                                                                                                                               | scaffold_1_mRNA_1633.1          | -                           | -                               |
| GF0026322 | 1                           | 0                       | 0                           | 0 Cytoskin riboside 5'-monophosphate phosphoribidylase (1)  | GTPase activity [GO:0003924 molecular_function] (1); GTP binding [GO:0005525 molecular_function] (1); microtubule [GO:0005874 cellular_component] (1); structural constituent of cytoskeleton [GO:0005200 molecular_function] (1); microtubule-based process [GO:0007017 biological_process] (1)                                       | LOG family [IPR031100] (1)                                                                                                                                                                                                                                                                                                                                                    | scaffold_1_mRNA_1620.1          | -                           | -                               |
| GF0026321 | 1                           | 0                       | 0                           | 0 Hypothetical protein (1)                                  | zinc ion binding [GO:0008270 molecular_function] (1); nucleic acid binding [GO:0003676 molecular_function] (1)                                                                                                                                                                                                                         | Tubulin [IPR00217] (1); Beta tubulin [IPR02453] (1); Tubulin FtsZ, GTPase domain [IPR030008] (1)                                                                                                                                                                                                                                                                              | scaffold_1_mRNA_1618.1          | -                           | -                               |
| GF0026320 | 1                           | 0                       | 0                           | 0 Hypothetical protein (1)                                  | zinc ion binding [GO:0008270 molecular_function] (1); nucleic acid binding [GO:0003676 molecular_function] (1)                                                                                                                                                                                                                         | Zinc finger, CCHC-type [IPR001878] (1)                                                                                                                                                                                                                                                                                                                                        | scaffold_1_mRNA_1611.1          | -                           | -                               |
| GF0026319 | 1                           | 0                       | 0                           | 0 Umbelliferone 8-geranyltransferase (1)                    |                                                                                                                                                                                                                                                                                                                                        |                                                                                                                                                                                                                                                                                                                                                                               | scaffold_1_mRNA_161.1           | -                           | -                               |
| GF0026318 | 1                           | 0                       | 0                           | 0 Cytoskin riboside 5'-monophosphate phosphoribidylase (1)  |                                                                                                                                                                                                                                                                                                                                        | LOG family [IPR031100] (1)                                                                                                                                                                                                                                                                                                                                                    | scaffold_1_mRNA_1609.1          | -                           | -                               |
| GF0026317 | 1                           | 0                       | 0                           | 0 Hypothetical protein (1)                                  |                                                                                                                                                                                                                                                                                                                                        | Retrosposon gag domain [IPR005162] (1)                                                                                                                                                                                                                                                                                                                                        | scaffold_1_mRNA_1608.1          | -                           | -                               |
| GF0026316 | 1                           | 0                       | 0                           | 0 Hypothetical protein (1)                                  |                                                                                                                                                                                                                                                                                                                                        |                                                                                                                                                                                                                                                                                                                                                                               | scaffold_1_mRNA_1607.1          | -                           | -                               |
| GF0026315 | 1                           | 0                       | 0                           | 0 Cytoskin riboside 5'-monophosphate phosphoribidylase (1)  |                                                                                                                                                                                                                                                                                                                                        | LOG family [IPR031100] (1)                                                                                                                                                                                                                                                                                                                                                    | scaffold_1_mRNA_1602.1          | -                           | -                               |
| GF0026314 | 1                           | 0                       | 0                           | 0 Hypothetical protein (1)                                  |                                                                                                                                                                                                                                                                                                                                        |                                                                                                                                                                                                                                                                                                                                                                               | scaffold_1_mRNA_1601.1          | -                           | -                               |
| GF0026313 | 1                           | 0                       | 0                           | 0 Hypothetical protein (1)                                  |                                                                                                                                                                                                                                                                                                                                        |                                                                                                                                                                                                                                                                                                                                                                               | scaffold_1_mRNA_16.1            | -                           | -                               |
| GF0026312 | 1                           | 0                       | 0                           | 0 Hypothetical protein (1)                                  |                                                                                                                                                                                                                                                                                                                                        |                                                                                                                                                                                                                                                                                                                                                                               | scaffold_1_mRNA_1597.1          | -                           | -                               |
| GF0026311 | 1                           | 0                       | 0                           | 0 Hypothetical protein (1)                                  |                                                                                                                                                                                                                                                                                                                                        |                                                                                                                                                                                                                                                                                                                                                                               | scaffold_1_mRNA_1595.1          | -                           | -                               |
| GF0026310 | 1                           | 0                       | 0                           | 0 Integrase (1)                                             |                                                                                                                                                                                                                                                                                                                                        | Aspartic peptidase domain [IPR021109] (1)                                                                                                                                                                                                                                                                                                                                     | scaffold_1_mRNA_1594.1          | -                           | -                               |
| GF0026309 | 1                           | 0                       | 0                           | 0 Hypothetical protein (1)                                  |                                                                                                                                                                                                                                                                                                                                        | Aspartic peptidase domain [IPR021109] (1)                                                                                                                                                                                                                                                                                                                                     | scaffold_1_mRNA_1593.1          | -                           | -                               |
| GF0026308 | 1                           | 0                       | 0                           | 0 Hypothetical protein (1)                                  |                                                                                                                                                                                                                                                                                                                                        |                                                                                                                                                                                                                                                                                                                                                                               | scaffold_1_mRNA_1590.1          | -                           | -                               |
| GF0026307 | 1                           | 0                       | 0                           | 0 Hypothetical protein (1)                                  | protein binding [GO:0005515 molecular_function] (1)                                                                                                                                                                                                                                                                                    | C2 domain [IPR000008] (1)                                                                                                                                                                                                                                                                                                                                                     | scaffold_1_mRNA_1589.1          | -                           | -                               |
| GF0026306 | 1                           | 0                       | 0                           | 0 Hypothetical protein (1)                                  |                                                                                                                                                                                                                                                                                                                                        |                                                                                                                                                                                                                                                                                                                                                                               | scaffold_1_mRNA_1588.1          | -                           | -                               |
| GF0026305 | 1                           | 0                       | 0                           | 0 Hypothetical protein (1)                                  | zinc ion binding [GO:0008270 molecular_function] (1); nucleic acid binding [GO:0003676 molecular_function] (1)                                                                                                                                                                                                                         | Zinc finger, CCHC-type [IPR001878] (1)                                                                                                                                                                                                                                                                                                                                        | scaffold_1_mRNA_1586.1          | -                           | -                               |
| GF0026304 | 1                           | 0                       | 0                           | 0 Hypothetical protein (1)                                  |                                                                                                                                                                                                                                                                                                                                        |                                                                                                                                                                                                                                                                                                                                                                               | scaffold_1_mRNA_1577.1          | -                           | -                               |
| GF0026303 | 1                           | 0                       | 0                           | 0 Hypothetical protein (1)                                  |                                                                                                                                                                                                                                                                                                                                        | Domain of unknown function DUF4283 [IPR025588] (1)                                                                                                                                                                                                                                                                                                                            | scaffold_1_mRNA_1571.1          | -                           | -                               |
| GF0026302 | 1                           | 0                       | 0                           | 0 Hypothetical protein (1)                                  |                                                                                                                                                                                                                                                                                                                                        |                                                                                                                                                                                                                                                                                                                                                                               | scaffold_1_mRNA_1570.1          | -                           | -                               |
| GF0026301 | 1                           | 0                       | 0                           | 0 Cytoskin riboside 5'-monophosphate phosphoribidylase (1)  |                                                                                                                                                                                                                                                                                                                                        | LOG family [IPR031100] (1)                                                                                                                                                                                                                                                                                                                                                    | scaffold_1_mRNA_1569.1          | -                           | -                               |
| GF0026300 | 1                           | 0                       | 0                           | 0 Hypothetical protein (1)                                  |                                                                                                                                                                                                                                                                                                                                        |                                                                                                                                                                                                                                                                                                                                                                               | scaffold_1_mRNA_1557.1          | -                           | -                               |
| GF0026299 | 1                           | 0                       | 0                           | 0 Hypothetical protein (1)                                  |                                                                                                                                                                                                                                                                                                                                        |                                                                                                                                                                                                                                                                                                                                                                               | scaffold_1_mRNA_1556.1          | -                           | -                               |
| GF0026298 | 1                           | 0                       | 0                           | 0 Hypothetical protein (1)                                  |                                                                                                                                                                                                                                                                                                                                        |                                                                                                                                                                                                                                                                                                                                                                               | scaffold_1_mRNA_1550.1          | -                           | -                               |
| GF0026297 | 1                           | 0                       | 0                           | 0 Fructose-bisphosphate aldolase, class II (1)              | zinc ion binding [GO:0008270 molecular_function] (1); catalytic activity [GO:0003824 molecular_function] (1); carbohydrate metabolic process [GO:0005975 biological_process] (1); aldehyde-lyase activity [GO:0016832 molecular_function] (1)                                                                                          | Fructose-bisphosphate aldolase, class-II [IPR00771] (1); Aldolase-type TIM barrel [IPR013785] (1)                                                                                                                                                                                                                                                                             | scaffold_1_mRNA_1545.1          | -                           | -                               |
| GF0026296 | 1                           | 0                       | 0                           | 0 Hypothetical protein (1)                                  | cysteine-type peptidase activity [GO:000234 molecular_function] (1); chitin binding [GO:0008061 molecular_function] (1); hydrolase activity, hydrolyzing O-glycosyl compounds [GO:0004553 molecular_function] (1); carbohydrate metabolic process [GO:0005975 biological_process] (1); proteolysis [GO:0006508 biological_process] (1) | Chitinase insertion domain [IPR029070] (1); Glycoside hydrolase family 18, catalytic domain [IPR001223] (1); Ulp1 protease family, C-terminal catalytic domain [IPR026553] (1); Chitinase II [IPR011583] (1); Domain of unknown function DUF1985 [IPR015410] (1); Glycoside hydrolase, chitinase active site [IPR001579] (1); Glycoside hydrolase superfamily [IPR017853] (1) | scaffold_1_mRNA_154.1           | -                           | -                               |
| GF0026295 | 1                           | 0                       | 0                           | 0 Hypothetical protein (1)                                  |                                                                                                                                                                                                                                                                                                                                        |                                                                                                                                                                                                                                                                                                                                                                               | scaffold_1_mRNA_1539.1          | -                           | -                               |
| GF0026294 | 1                           | 0                       | 0                           | 0 Retrotransposon protein, putative, Ty1-copia subclass (1) | nucleic acid binding [GO:0003676 molecular_function] (1); DNA integration [GO:0015074 biological_process] (1); zinc ion binding [GO:0008270 molecular_function] (1)                                                                                                                                                                    | GAG-pre-integrase domain [IPR025724] (1); Zinc finger, CCHC-type [IPR001878] (1); Ribonuclease H-like domain [IPR012337] (1); Integrase, catalytic core [IPR001584] (1)                                                                                                                                                                                                       | scaffold_1_mRNA_1537.1          | -                           | -                               |
| GF0026293 | 1                           | 0                       | 0                           | 0 Hypothetical protein (1)                                  |                                                                                                                                                                                                                                                                                                                                        |                                                                                                                                                                                                                                                                                                                                                                               | scaffold_1_mRNA_1526.1          | -                           | -                               |
| GF0026292 | 1                           | 0                       | 0                           | 0 Hypothetical protein (1)                                  |                                                                                                                                                                                                                                                                                                                                        |                                                                                                                                                                                                                                                                                                                                                                               | scaffold_1_mRNA_1524.1          | -                           | -                               |
| GF0026291 | 1                           | 0                       | 0                           | 0 Hypothetical protein (1)                                  |                                                                                                                                                                                                                                                                                                                                        |                                                                                                                                                                                                                                                                                                                                                                               | scaffold_1_mRNA_1522.1          | -                           | -                               |
| GF0026290 | 1                           | 0                       | 0                           | 0 Hypothetical protein (1)                                  |                                                                                                                                                                                                                                                                                                                                        |                                                                                                                                                                                                                                                                                                                                                                               | scaffold_1_mRNA_1518.1          | -                           | -                               |
| GF0026289 | 1                           | 0                       | 0                           | 0 Hypothetical protein (1)                                  |                                                                                                                                                                                                                                                                                                                                        |                                                                                                                                                                                                                                                                                                                                                                               | scaffold_1_mRNA_1517.1          | -                           | -                               |
| GF0026288 | 1                           | 0                       | 0                           | 0 Hypothetical protein (1)                                  |                                                                                                                                                                                                                                                                                                                                        |                                                                                                                                                                                                                                                                                                                                                                               | scaffold_1_mRNA_1513.1          | -                           | -                               |
| GF0026287 | 1                           | 0                       | 0                           | 0 Hypothetical protein (1)                                  |                                                                                                                                                                                                                                                                                                                                        |                                                                                                                                                                                                                                                                                                                                                                               | scaffold_1_mRNA_1511.1          | -                           | -                               |
| GF0026286 | 1                           | 0                       | 0                           | 0 Hypothetical protein (1)                                  |                                                                                                                                                                                                                                                                                                                                        |                                                                                                                                                                                                                                                                                                                                                                               | scaffold_1_mRNA_1509.1          | -                           | -                               |
| GF0026285 | 1                           | 0                       | 0                           | 0 Hypothetical protein (1)                                  |                                                                                                                                                                                                                                                                                                                                        | Viral movement protein [IPR028919] (1)                                                                                                                                                                                                                                                                                                                                        | scaffold_1_mRNA_1506.1          | -                           | -                               |
| GF0026284 | 1                           | 0                       | 0                           | 0 Hypothetical protein (1)                                  |                                                                                                                                                                                                                                                                                                                                        |                                                                                                                                                                                                                                                                                                                                                                               | scaffold_1_mRNA_1503.1          | -                           | -                               |
| GF0026283 | 1                           | 0                       | 0                           | 0 Hypothetical protein (1)                                  | aspartic-type endopeptidase activity [GO:0004190 molecular_function] (1); zinc ion binding [GO:0008270 molecular_function] (1); proteolysis [GO:0006508 biological_process] (1); nucleic acid binding [GO:0003676 molecular_function] (1)                                                                                              | Zinc finger, CCHC-type [IPR001878] (1); Aspartic peptidase domain [IPR021109] (1); Peptidase A2A, retrovirus, catalytic [IPR001995] (1); Reverse transcriptase domain [IPR004477] (1); Retropepsins [IPR018061] (1)                                                                                                                                                           | scaffold_1_mRNA_1501.1          | -                           | -                               |
| GF0026282 | 1                           | 0                       | 0                           | 0 Hypothetical protein (1)                                  |                                                                                                                                                                                                                                                                                                                                        |                                                                                                                                                                                                                                                                                                                                                                               | scaffold_1_mRNA_1500.1          | -                           | -                               |
| GF0026281 | 1                           | 0                       | 0                           | 0 Hypothetical protein (1)                                  |                                                                                                                                                                                                                                                                                                                                        |                                                                                                                                                                                                                                                                                                                                                                               | scaffold_1_mRNA_1498.1          | -                           | -                               |
| GF0026280 | 1                           | 0                       | 0                           | 0 Hypothetical protein (1)                                  |                                                                                                                                                                                                                                                                                                                                        |                                                                                                                                                                                                                                                                                                                                                                               | scaffold_1_mRNA_1497.1          | -                           | -                               |
| GF0026279 | 1                           | 0                       | 0                           | 0 Hypothetical protein (1)                                  |                                                                                                                                                                                                                                                                                                                                        |                                                                                                                                                                                                                                                                                                                                                                               | scaffold_1_mRNA_1496.1          | -                           | -                               |
| GF0026278 | 1                           | 0                       | 0                           | 0 Eng protease polyprotein (1)                              |                                                                                                                                                                                                                                                                                                                                        |                                                                                                                                                                                                                                                                                                                                                                               | scaffold_1_mRNA_1495.1          | -                           | -                               |
| GF0026277 | 1                           | 0                       | 0                           | 0 Hypothetical protein (1)                                  |                                                                                                                                                                                                                                                                                                                                        |                                                                                                                                                                                                                                                                                                                                                                               | scaffold_1_mRNA_1492.1          | -                           | -                               |
| GF0026276 | 1                           | 0                       | 0                           | 0 Hypothetical protein (1)                                  | nucleic acid binding [GO:0003676 molecular_function] (1); zinc ion binding [GO:0008270 molecular_function] (1)                                                                                                                                                                                                                         | Zinc finger, CCHC-type [IPR001878] (1)                                                                                                                                                                                                                                                                                                                                        | scaffold_1_mRNA_1489.1          | -                           | -                               |
| GF0026275 | 1                           | 0                       | 0                           | 0 Hypothetical protein (1)                                  |                                                                                                                                                                                                                                                                                                                                        |                                                                                                                                                                                                                                                                                                                                                                               | scaffold_1_mRNA_1488.1          | -                           | -                               |
| GF0026274 | 1                           | 0                       | 0                           | 0 Hypothetical protein (1)                                  |                                                                                                                                                                                                                                                                                                                                        | Reverse transcriptase domain [IPR004477] (1)                                                                                                                                                                                                                                                                                                                                  | scaffold_1_mRNA_1486.1          | -                           | -                               |
| GF0026273 | 1                           | 0                       | 0                           | 0 Hypothetical protein (1)                                  |                                                                                                                                                                                                                                                                                                                                        |                                                                                                                                                                                                                                                                                                                                                                               | scaffold_1_mRNA_1483.1          | -                           | -                               |
| GF0026272 | 1                           | 0                       | 0                           | 0 Hypothetical protein (1)                                  |                                                                                                                                                                                                                                                                                                                                        |                                                                                                                                                                                                                                                                                                                                                                               | scaffold_1_mRNA_1480.1          | -                           | -                               |
| GF0026271 | 1                           | 0                       | 0                           | 0 Hypothetical protein (1)                                  |                                                                                                                                                                                                                                                                                                                                        |                                                                                                                                                                                                                                                                                                                                                                               | scaffold_1_mRNA_148.1           | -                           | -                               |
| GF0026270 | 1                           | 0                       | 0                           | 0 Hypothetical protein (1)                                  |                                                                                                                                                                                                                                                                                                                                        |                                                                                                                                                                                                                                                                                                                                                                               | scaffold_1_mRNA_1478.1          | -                           | -                               |
| GF0026269 | 1                           | 0                       | 0                           | 0 Hypothetical protein (1)                                  |                                                                                                                                                                                                                                                                                                                                        |                                                                                                                                                                                                                                                                                                                                                                               | scaffold_1_mRNA_1474.1          | -                           | -                               |
| GF0026268 | 1                           | 0                       | 0                           | 0 Hypothetical protein (1)                                  |                                                                                                                                                                                                                                                                                                                                        |                                                                                                                                                                                                                                                                                                                                                                               | scaffold_1_mRNA_1473.1          | -                           | -                               |
| GF0026267 | 1                           | 0                       | 0                           | 0 Hypothetical protein (1)                                  |                                                                                                                                                                                                                                                                                                                                        |                                                                                                                                                                                                                                                                                                                                                                               | scaffold_1_mRNA_1469.1          | -                           | -                               |
| GF0026266 | 1                           | 0                       | 0                           | 0 Hypothetical protein (1)                                  |                                                                                                                                                                                                                                                                                                                                        |                                                                                                                                                                                                                                                                                                                                                                               | scaffold_1_mRNA_1464.1          | -                           | -                               |
| GF0026265 | 1                           | 0                       | 0                           | 0 Hypothetical protein (1)                                  |                                                                                                                                                                                                                                                                                                                                        |                                                                                                                                                                                                                                                                                                                                                                               | scaffold_1_mRNA_1463.1          | -                           | -                               |
| GF0026264 | 1                           | 0                       | 0                           | 0 Hypothetical protein (1)                                  |                                                                                                                                                                                                                                                                                                                                        |                                                                                                                                                                                                                                                                                                                                                                               | scaffold_1_mRNA_1462.1          | -                           | -                               |
| GF0026263 | 1                           | 0                       | 0                           | 0 Hypothetical protein (1)                                  |                                                                                                                                                                                                                                                                                                                                        |                                                                                                                                                                                                                                                                                                                                                                               | scaffold_1_mRNA_146.1           | -                           | -                               |
| GF0026262 | 1                           | 0                       | 0                           | 0 Hypothetical protein (1)                                  |                                                                                                                                                                                                                                                                                                                                        |                                                                                                                                                                                                                                                                                                                                                                               | scaffold_1_mRNA_1457.1          | -                           | -                               |
| GF0026261 | 1                           | 0                       | 0                           | 0 Hypothetical protein (1)                                  |                                                                                                                                                                                                                                                                                                                                        |                                                                                                                                                                                                                                                                                                                                                                               | scaffold_1_mRNA_1452.1          | -                           | -                               |
| GF0026260 | 1                           | 0                       | 0                           | 0 Hypothetical protein (1)                                  |                                                                                                                                                                                                                                                                                                                                        | Retropepsins [IPR018061] (1); Aspartic peptidase domain [IPR021109] (1)                                                                                                                                                                                                                                                                                                       | scaffold_1_mRNA_1450.1          | -                           | -                               |
| GF0026259 | 1                           | 0                       | 0                           | 0 Hypothetical protein (1)                                  |                                                                                                                                                                                                                                                                                                                                        |                                                                                                                                                                                                                                                                                                                                                                               | scaffold_1_mRNA_1449.1          | -                           | -                               |
| GF0026258 | 1                           | 0                       | 0                           | 0 Hypothetical protein (1)                                  |                                                                                                                                                                                                                                                                                                                                        |                                                                                                                                                                                                                                                                                                                                                                               | scaffold_1_mRNA_1447.1          | -                           | -                               |
| GF0026257 | 1                           | 0                       | 0                           | 0 Hypothetical protein (1)                                  |                                                                                                                                                                                                                                                                                                                                        | Aspartic peptidase domain [IPR021109] (1)                                                                                                                                                                                                                                                                                                                                     | scaffold_1_mRNA_1445.1          | -                           | -                               |
| GF0026256 | 1                           | 0                       | 0                           | 0 Hypothetical protein (1)                                  |                                                                                                                                                                                                                                                                                                                                        | Viral movement protein [IPR028919] (1)                                                                                                                                                                                                                                                                                                                                        | scaffold_1_mRNA_1440.1          | -                           | -                               |
| GF0026255 | 1                           | 0                       | 0                           | 0 Hypothetical protein (1)                                  |                                                                                                                                                                                                                                                                                                                                        | Reverse transcriptase domain [IPR004477] (1)                                                                                                                                                                                                                                                                                                                                  | scaffold_1_mRNA_1435.1          | -                           | -                               |
| GF0026254 | 1                           | 0                       | 0                           | 0 Hypothetical protein (1)                                  |                                                                                                                                                                                                                                                                                                                                        |                                                                                                                                                                                                                                                                                                                                                                               | scaffold_1_mRNA_1434.1          | -                           | -                               |
| GF0026253 | 1                           | 0                       | 0                           | 0 Hypothetical protein (1)                                  |                                                                                                                                                                                                                                                                                                                                        |                                                                                                                                                                                                                                                                                                                                                                               | scaffold_1_mRNA_1429.1          | -                           | -                               |
| GF0026252 | 1                           | 0                       | 0                           | 0 Hypothetical protein (1)                                  |                                                                                                                                                                                                                                                                                                                                        |                                                                                                                                                                                                                                                                                                                                                                               | scaffold_1_mRNA_1424.1          | -                           | -                               |
| GF0026251 | 1                           | 0                       | 0                           | 0 Hypothetical protein (1)                                  |                                                                                                                                                                                                                                                                                                                                        |                                                                                                                                                                                                                                                                                                                                                                               | scaffold_1_mRNA_1420.1          | -                           | -                               |
| GF0026250 | 1                           | 0                       | 0                           | 0 Hypothetical protein (1)                                  |                                                                                                                                                                                                                                                                                                                                        |                                                                                                                                                                                                                                                                                                                                                                               | scaffold_1_mRNA_1419.1          | -                           | -                               |
| GF0026249 | 1                           | 0                       | 0                           | 0 Hypothetical protein (1)                                  |                                                                                                                                                                                                                                                                                                                                        |                                                                                                                                                                                                                                                                                                                                                                               | scaffold_1_mRNA_1418.1          | -                           | -                               |
| GF0026248 | 1                           | 0                       | 0                           | 0 Hypothetical protein (1)                                  |                                                                                                                                                                                                                                                                                                                                        |                                                                                                                                                                                                                                                                                                                                                                               | scaffold_1_mRNA_1417.1          | -                           | -                               |
| GF0026247 | 1                           | 0                       | 0                           | 0 Hypothetical protein (1)                                  |                                                                                                                                                                                                                                                                                                                                        |                                                                                                                                                                                                                                                                                                                                                                               | scaffold_1_mRNA_1416.1          | -                           | -                               |
| GF0026246 | 1                           | 0                       | 0                           | 0 Hypothetical protein (1)                                  |                                                                                                                                                                                                                                                                                                                                        |                                                                                                                                                                                                                                                                                                                                                                               | scaffold_1_mRNA_1415.1          | -                           | -                               |
| GF0026245 | 1                           | 0                       | 0                           | 0 Hypothetical protein (1)                                  |                                                                                                                                                                                                                                                                                                                                        |                                                                                                                                                                                                                                                                                                                                                                               | scaffold_1_mRNA_1413.1          | -                           | -                               |

| ID        | Num. in <i>C. clementinae</i> | Num in <i>C. uchiha</i> | Num in <i>P. trifoliata</i> | Note                                                                 | GO                                                                                                                                                                                                                                                                                             | InterPro                                                                                                                                                                    | Members in <i>C. clementinae</i> | Members in <i>C. uchiha</i> | Members in <i>P. trifoliata</i> |
|-----------|-------------------------------|-------------------------|-----------------------------|----------------------------------------------------------------------|------------------------------------------------------------------------------------------------------------------------------------------------------------------------------------------------------------------------------------------------------------------------------------------------|-----------------------------------------------------------------------------------------------------------------------------------------------------------------------------|----------------------------------|-----------------------------|---------------------------------|
| GF0026244 | 1                             | 0                       | 0                           | 0 Hypothetical protein (1)                                           |                                                                                                                                                                                                                                                                                                |                                                                                                                                                                             | scaffold_1_mRNA_1411.1           | -                           | -                               |
| GF0026243 | 1                             | 0                       | 0                           | 0 Hypothetical protein (1)                                           |                                                                                                                                                                                                                                                                                                |                                                                                                                                                                             | scaffold_1_mRNA_1410.1           | -                           | -                               |
| GF0026242 | 1                             | 0                       | 0                           | 0 RNA polymerase I-specific transcription initiation factor RRNS (1) | proteolysis [GO:0006508]                                                                                                                                                                                                                                                                       | Viral movement protein [IPR028919] (1)<br>RNA polymerase I specific transcription initiation factor RRNS [IPR007991] (1)                                                    | scaffold_1_mRNA_1411.1           | -                           | -                               |
| GF0026241 | 1                             | 0                       | 0                           | 0 Hypothetical protein (1)                                           | biological_process (1); aspartic-type endopeptidase activity [GO:0004190 molecular_function] (1)                                                                                                                                                                                               | Peptidase A2A, retrovirus, catalytic [IPR001955] (1)                                                                                                                        | scaffold_1_mRNA_1409.1           | -                           | -                               |
| GF0026240 | 1                             | 0                       | 0                           | 0 Hypothetical protein (1)                                           |                                                                                                                                                                                                                                                                                                |                                                                                                                                                                             | scaffold_1_mRNA_1408.1           | -                           | -                               |
| GF0026239 | 1                             | 0                       | 0                           | 0 Hypothetical protein (1)                                           |                                                                                                                                                                                                                                                                                                | Viral movement protein [IPR028919] (1)                                                                                                                                      | scaffold_1_mRNA_1407.1           | -                           | -                               |
| GF0026238 | 1                             | 0                       | 0                           | 0 Hypothetical protein (1)                                           |                                                                                                                                                                                                                                                                                                |                                                                                                                                                                             | scaffold_1_mRNA_1406.1           | -                           | -                               |
| GF0026237 | 1                             | 0                       | 0                           | 0 Hypothetical protein (1)                                           |                                                                                                                                                                                                                                                                                                |                                                                                                                                                                             | scaffold_1_mRNA_1401.1           | -                           | -                               |
| GF0026236 | 1                             | 0                       | 0                           | 0 Hypothetical protein (1)                                           |                                                                                                                                                                                                                                                                                                |                                                                                                                                                                             | scaffold_1_mRNA_1400.1           | -                           | -                               |
| GF0026235 | 1                             | 0                       | 0                           | 0 Hypothetical protein (1)                                           |                                                                                                                                                                                                                                                                                                |                                                                                                                                                                             | scaffold_1_mRNA_1399.1           | -                           | -                               |
| GF0026234 | 1                             | 0                       | 0                           | 0 Hypothetical protein (1)                                           |                                                                                                                                                                                                                                                                                                |                                                                                                                                                                             | scaffold_1_mRNA_1394.1           | -                           | -                               |
| GF0026233 | 1                             | 0                       | 0                           | 0 Hypothetical protein (1)                                           |                                                                                                                                                                                                                                                                                                | Viral movement protein [IPR028919] (1)                                                                                                                                      | scaffold_1_mRNA_1390.1           | -                           | -                               |
| GF0026232 | 1                             | 0                       | 0                           | 0 Hypothetical protein (1)                                           | aspartic-type endopeptidase activity [GO:0004190 molecular_function] (1); proteolysis [GO:0006508 biological_process] (1)                                                                                                                                                                      | Aspartic peptidase, active site [IPR001969] (1); Peptidase A2A, retrovirus, catalytic [IPR001955] (1)                                                                       | scaffold_1_mRNA_1389.1           | -                           | -                               |
| GF0026231 | 1                             | 0                       | 0                           | 0 Hypothetical protein (1)                                           |                                                                                                                                                                                                                                                                                                |                                                                                                                                                                             | scaffold_1_mRNA_1388.1           | -                           | -                               |
| GF0026230 | 1                             | 0                       | 0                           | 0 Hypothetical protein (1)                                           |                                                                                                                                                                                                                                                                                                |                                                                                                                                                                             | scaffold_1_mRNA_1385.1           | -                           | -                               |
| GF0026229 | 1                             | 0                       | 0                           | 0 Hypothetical protein (1)                                           | proteolysis [GO:0006508 biological_process] (1); nucleic acid binding [GO:0030376 molecular_function] (1); aspartic-type endopeptidase activity [GO:0004190 molecular_function] (1); zinc ion binding [GO:0008270 molecular_function] (1)                                                      | Aspartic peptidase, active site [IPR001969] (1); Zinc finger, CCHC-type [IPR001878] (1)                                                                                     | scaffold_1_mRNA_1384.1           | -                           | -                               |
| GF0026228 | 1                             | 0                       | 0                           | 0 Hypothetical protein (1)                                           |                                                                                                                                                                                                                                                                                                |                                                                                                                                                                             | scaffold_1_mRNA_1381.1           | -                           | -                               |
| GF0026227 | 1                             | 0                       | 0                           | 0 Hypothetical protein (1)                                           |                                                                                                                                                                                                                                                                                                |                                                                                                                                                                             | scaffold_1_mRNA_1380.1           | -                           | -                               |
| GF0026226 | 1                             | 0                       | 0                           | 0 Hypothetical protein (1)                                           |                                                                                                                                                                                                                                                                                                |                                                                                                                                                                             | scaffold_1_mRNA_1376.1           | -                           | -                               |
| GF0026225 | 1                             | 0                       | 0                           | 0 Hypothetical protein (1)                                           | nucleic acid binding [GO:0030376 molecular_function] (1); DNA integration [GO:0015074 biological_process] (1)                                                                                                                                                                                  | Ribonuclease H-like domain [IPR012337] (1); Integrase, catalytic core [IPR01584] (1); Aspartic peptidase domain [IPR021109] (1); Retrotransposon gag domain [IPR005162] (1) | scaffold_1_mRNA_1373.1           | -                           | -                               |
| GF0026224 | 1                             | 0                       | 0                           | 0 Hypothetical protein (1)                                           | nucleus [GO:0005634 cellular_component] (1); DNA binding [GO:0003677 molecular_function] (1); DNA replication [GO:0006260 biological_process] (1)                                                                                                                                              | Nucleic acid-binding, OB-fold [IPR012340] (1); Replication factor-A protein 1, N-terminal [IPR007199] (1)                                                                   | scaffold_1_mRNA_1371.1           | -                           | -                               |
| GF0026223 | 1                             | 0                       | 0                           | 0 Hypothetical protein (1)                                           | lipid metabolic process [GO:0006629 biological_process] (1)                                                                                                                                                                                                                                    | Alpha/Beta hydrolase fold [IPR029058] (1); Fungal lipase-like domain [IPR029211] (1)                                                                                        | scaffold_1_mRNA_137.1            | -                           | -                               |
| GF0026222 | 1                             | 0                       | 0                           | 0 Hypothetical protein (1)                                           |                                                                                                                                                                                                                                                                                                |                                                                                                                                                                             | scaffold_1_mRNA_1364.1           | -                           | -                               |
| GF0026221 | 1                             | 0                       | 0                           | 0 Hypothetical protein (1)                                           |                                                                                                                                                                                                                                                                                                |                                                                                                                                                                             | scaffold_1_mRNA_1363.1           | -                           | -                               |
| GF0026220 | 1                             | 0                       | 0                           | 0 Hypothetical protein (1)                                           |                                                                                                                                                                                                                                                                                                |                                                                                                                                                                             | scaffold_1_mRNA_1362.1           | -                           | -                               |
| GF0026219 | 1                             | 0                       | 0                           | 0 Hypothetical protein (1)                                           |                                                                                                                                                                                                                                                                                                |                                                                                                                                                                             | scaffold_1_mRNA_1361.1           | -                           | -                               |
| GF0026218 | 1                             | 0                       | 0                           | 0 Hypothetical protein (1)                                           |                                                                                                                                                                                                                                                                                                |                                                                                                                                                                             | scaffold_1_mRNA_1360.1           | -                           | -                               |
| GF0026217 | 1                             | 0                       | 0                           | 0 Hypothetical protein (1)                                           |                                                                                                                                                                                                                                                                                                |                                                                                                                                                                             | scaffold_1_mRNA_1357.1           | -                           | -                               |
| GF0026216 | 1                             | 0                       | 0                           | 0 Hypothetical protein (1)                                           |                                                                                                                                                                                                                                                                                                |                                                                                                                                                                             | scaffold_1_mRNA_1355.1           | -                           | -                               |
| GF0026215 | 1                             | 0                       | 0                           | 0 Hypothetical protein (1)                                           |                                                                                                                                                                                                                                                                                                |                                                                                                                                                                             | scaffold_1_mRNA_1353.1           | -                           | -                               |
| GF0026214 | 1                             | 0                       | 0                           | 0 Hypothetical protein (1)                                           |                                                                                                                                                                                                                                                                                                |                                                                                                                                                                             | scaffold_1_mRNA_135.1            | -                           | -                               |
| GF0026213 | 1                             | 0                       | 0                           | 0 Hypothetical protein (1)                                           |                                                                                                                                                                                                                                                                                                |                                                                                                                                                                             | scaffold_1_mRNA_1347.1           | -                           | -                               |
| GF0026212 | 1                             | 0                       | 0                           | 0 Hypothetical protein (1)                                           |                                                                                                                                                                                                                                                                                                |                                                                                                                                                                             | scaffold_1_mRNA_1344.1           | -                           | -                               |
| GF0026211 | 1                             | 0                       | 0                           | 0 Hypothetical protein (1)                                           |                                                                                                                                                                                                                                                                                                |                                                                                                                                                                             | scaffold_1_mRNA_1341.1           | -                           | -                               |
| GF0026210 | 1                             | 0                       | 0                           | 0 Hypothetical protein (1)                                           | zinc ion binding [GO:0008270 molecular_function] (1); nucleic acid binding [GO:0030376 molecular_function] (1)                                                                                                                                                                                 | Domain of unknown function DUF4219 [IPR025314] (1); Zinc finger, CCHC-type [IPR001878] (1)                                                                                  | scaffold_1_mRNA_1340.1           | -                           | -                               |
| GF0026209 | 1                             | 0                       | 0                           | 0 Hypothetical protein (1)                                           |                                                                                                                                                                                                                                                                                                |                                                                                                                                                                             | scaffold_1_mRNA_1338.1           | -                           | -                               |
| GF0026208 | 1                             | 0                       | 0                           | 0 Cytokinin riboside 5'-monophosphate phosphoribohydrolase (1)       |                                                                                                                                                                                                                                                                                                | LOG family [IPR031100] (1)                                                                                                                                                  | scaffold_1_mRNA_1337.1           | -                           | -                               |
| GF0026207 | 1                             | 0                       | 0                           | 0 Hypothetical protein (1)                                           |                                                                                                                                                                                                                                                                                                |                                                                                                                                                                             | scaffold_1_mRNA_1336.1           | -                           | -                               |
| GF0026206 | 1                             | 0                       | 0                           | 0 Cytokinin riboside 5'-monophosphate phosphoribohydrolase (1)       |                                                                                                                                                                                                                                                                                                | Cytokinin riboside 5'-monophosphate phosphoribohydrolase LOG [IPR005269] (1); LOG family [IPR031100] (1)                                                                    | scaffold_1_mRNA_1332.1           | -                           | -                               |
| GF0026205 | 1                             | 0                       | 0                           | 0 Integrase (1)                                                      |                                                                                                                                                                                                                                                                                                | Aspartic peptidase domain [IPR021109] (1)                                                                                                                                   | scaffold_1_mRNA_1331.1           | -                           | -                               |
| GF0026204 | 1                             | 0                       | 0                           | 0 Hypothetical protein (1)                                           |                                                                                                                                                                                                                                                                                                |                                                                                                                                                                             | scaffold_1_mRNA_1326.1           | -                           | -                               |
| GF0026203 | 1                             | 0                       | 0                           | 0 Hypothetical protein (1)                                           |                                                                                                                                                                                                                                                                                                |                                                                                                                                                                             | scaffold_1_mRNA_1324.1           | -                           | -                               |
| GF0026202 | 1                             | 0                       | 0                           | 0 Hypothetical protein (1)                                           |                                                                                                                                                                                                                                                                                                |                                                                                                                                                                             | scaffold_1_mRNA_1323.1           | -                           | -                               |
| GF0026201 | 1                             | 0                       | 0                           | 0 Hypothetical protein (1)                                           |                                                                                                                                                                                                                                                                                                |                                                                                                                                                                             | scaffold_1_mRNA_1321.1           | -                           | -                               |
| GF0026200 | 1                             | 0                       | 0                           | 0 Hypothetical protein (1)                                           |                                                                                                                                                                                                                                                                                                |                                                                                                                                                                             | scaffold_1_mRNA_1315.1           | -                           | -                               |
| GF0026199 | 1                             | 0                       | 0                           | 0 Cytokinin riboside 5'-monophosphate phosphoribohydrolase (1)       |                                                                                                                                                                                                                                                                                                | LOG family [IPR031100] (1)                                                                                                                                                  | scaffold_1_mRNA_1314.1           | -                           | -                               |
| GF0026198 | 1                             | 0                       | 0                           | 0 Hypothetical protein (1)                                           |                                                                                                                                                                                                                                                                                                |                                                                                                                                                                             | scaffold_1_mRNA_1310.1           | -                           | -                               |
| GF0026197 | 1                             | 0                       | 0                           | 0 Putative AC9 transposase (1)                                       | protein dimerization activity [GO:0046083 molecular_function] (1); nucleic acid binding [GO:0030376 molecular_function] (1)                                                                                                                                                                    | HAT, C-terminal dimerisation domain [IPR008906] (1); Ribonuclease H-like domain [IPR012337] (1)                                                                             | scaffold_1_mRNA_1308.1           | -                           | -                               |
| GF0026196 | 1                             | 0                       | 0                           | 0 Hypothetical protein (1)                                           |                                                                                                                                                                                                                                                                                                |                                                                                                                                                                             | scaffold_1_mRNA_1300.1           | -                           | -                               |
| GF0026195 | 1                             | 0                       | 0                           | 0 Hypothetical protein (1)                                           |                                                                                                                                                                                                                                                                                                |                                                                                                                                                                             | scaffold_1_mRNA_1298.1           | -                           | -                               |
| GF0026194 | 1                             | 0                       | 0                           | 0 Hypothetical protein (1)                                           |                                                                                                                                                                                                                                                                                                | LOG family [IPR031100] (1)                                                                                                                                                  | scaffold_1_mRNA_1297.1           | -                           | -                               |
| GF0026193 | 1                             | 0                       | 0                           | 0 Hypothetical protein (1)                                           |                                                                                                                                                                                                                                                                                                |                                                                                                                                                                             | scaffold_1_mRNA_1294.1           | -                           | -                               |
| GF0026192 | 1                             | 0                       | 0                           | 0 Hypothetical protein (1)                                           | protein ubiquitination [GO:0016567 biological_process] (1); ubiquitin-protein transferase activity [GO:0004842 molecular_function] (1)                                                                                                                                                         | Zinc finger, RING FYVE/PHD-type [IPR013083] (1); U box domain [IPR003613] (1); Rossmann-like alpha/beta/alpha sandwich fold [IPR014729] (1)                                 | scaffold_1_mRNA_1274.1           | -                           | -                               |
| GF0026191 | 1                             | 0                       | 0                           | 0 Hypothetical protein (1)                                           | DNA binding [GO:0003677 molecular_function] (1)                                                                                                                                                                                                                                                | hAT-like transposase, RNase-H fold [IPR025252] (1)                                                                                                                          | scaffold_1_mRNA_1273.1           | -                           | -                               |
| GF0026190 | 1                             | 0                       | 0                           | 0 Hypothetical protein (1)                                           |                                                                                                                                                                                                                                                                                                |                                                                                                                                                                             | scaffold_1_mRNA_1270.1           | -                           | -                               |
| GF0026189 | 1                             | 0                       | 0                           | 0 Hypothetical protein (1)                                           |                                                                                                                                                                                                                                                                                                |                                                                                                                                                                             | scaffold_1_mRNA_1268.1           | -                           | -                               |
| GF0026188 | 1                             | 0                       | 0                           | 0 Hypothetical protein (1)                                           |                                                                                                                                                                                                                                                                                                |                                                                                                                                                                             | scaffold_1_mRNA_1264.1           | -                           | -                               |
| GF0026187 | 1                             | 0                       | 0                           | 0 Hypothetical protein (1)                                           |                                                                                                                                                                                                                                                                                                |                                                                                                                                                                             | scaffold_1_mRNA_1257.1           | -                           | -                               |
| GF0026186 | 1                             | 0                       | 0                           | 0 Hypothetical protein (1)                                           |                                                                                                                                                                                                                                                                                                |                                                                                                                                                                             | scaffold_1_mRNA_1255.1           | -                           | -                               |
| GF0026185 | 1                             | 0                       | 0                           | 0 Hypothetical protein (1)                                           |                                                                                                                                                                                                                                                                                                | Retrotransposon gag domain [IPR005162] (1)                                                                                                                                  | scaffold_1_mRNA_1252.1           | -                           | -                               |
| GF0026184 | 1                             | 0                       | 0                           | 0 Hypothetical protein (1)                                           |                                                                                                                                                                                                                                                                                                | Domain of unknown function DUF4283 [IPR025558] (1)                                                                                                                          | scaffold_1_mRNA_1250.1           | -                           | -                               |
| GF0026183 | 1                             | 0                       | 0                           | 0 Hypothetical protein (1)                                           |                                                                                                                                                                                                                                                                                                | Transposase, MuDR, plant [IPR004332] (1)                                                                                                                                    | scaffold_1_mRNA_1249.1           | -                           | -                               |
| GF0026182 | 1                             | 0                       | 0                           | 0 Hypothetical protein (1)                                           |                                                                                                                                                                                                                                                                                                | Viral movement protein [IPR028919] (1)                                                                                                                                      | scaffold_1_mRNA_1248.1           | -                           | -                               |
| GF0026181 | 1                             | 0                       | 0                           | 0 Hypothetical protein (1)                                           |                                                                                                                                                                                                                                                                                                |                                                                                                                                                                             | scaffold_1_mRNA_1246.1           | -                           | -                               |
| GF0026180 | 1                             | 0                       | 0                           | 0 Hypothetical protein (1)                                           | mitochondrial inner membrane [GO:0005743 cellular_component] (1); ubiquinol-cytochrome-c reductase activity [GO:0008121 molecular_function] (1); respiratory chain complex subunit 8, plants [GO:0070469 cellular_component] (1); electron transport chain [GO:0022900 biological_process] (1) | Cytochrome b-c1 complex subunit 8 [IPR04205] (1); Cytochrome b-c1 complex subunit 8, plants [IPR020101] (1)                                                                 | scaffold_1_mRNA_1239.1           | -                           | -                               |
| GF0026179 | 1                             | 0                       | 0                           | 0 Hypothetical protein (1)                                           |                                                                                                                                                                                                                                                                                                |                                                                                                                                                                             | scaffold_1_mRNA_1230.1           | -                           | -                               |
| GF0026178 | 1                             | 0                       | 0                           | 0 Hypothetical protein (1)                                           |                                                                                                                                                                                                                                                                                                | Aspartic peptidase domain [IPR021109] (1); Retropepsins [IPR018061] (1)                                                                                                     | scaffold_1_mRNA_1228.1           | -                           | -                               |
| GF0026177 | 1                             | 0                       | 0                           | 0 Cytokinin riboside 5'-monophosphate phosphoribohydrolase (1)       |                                                                                                                                                                                                                                                                                                | Cytokinin riboside 5'-monophosphate phosphoribohydrolase LOG [IPR005269] (1); LOG family [IPR031100] (1)                                                                    | scaffold_1_mRNA_1221.1           | -                           | -                               |
| GF0026176 | 1                             | 0                       | 0                           | 0 Hypothetical protein (1)                                           |                                                                                                                                                                                                                                                                                                |                                                                                                                                                                             | scaffold_1_mRNA_1217.1           | -                           | -                               |
| GF0026175 | 1                             | 0                       | 0                           | 0 Hypothetical protein (1)                                           |                                                                                                                                                                                                                                                                                                |                                                                                                                                                                             | scaffold_1_mRNA_1211.1           | -                           | -                               |
| GF0026174 | 1                             | 0                       | 0                           | 0 Hypothetical protein (1)                                           |                                                                                                                                                                                                                                                                                                | Reverse transcriptase domain [IPR00477] (1); Aspartic peptidase domain [IPR021109] (1)                                                                                      | scaffold_1_mRNA_1208.1           | -                           | -                               |
| GF0026173 | 1                             | 0                       | 0                           | 0 Hypothetical protein (1)                                           | regulation of transcription, DNA-templated [GO:0006355 biological_process] (1); nucleic acid binding [GO:0030376 molecular_function] (1)                                                                                                                                                       | Carlavirus nucleic acid-binding protein [IPR002568] (1)                                                                                                                     | scaffold_1_mRNA_1205.1           | -                           | -                               |
| GF0026172 | 1                             | 0                       | 0                           | 0 Cytokinin riboside 5'-monophosphate phosphoribohydrolase (1)       |                                                                                                                                                                                                                                                                                                | Cytokinin riboside 5'-monophosphate phosphoribohydrolase LOG [IPR005269] (1); LOG family [IPR031100] (1)                                                                    | scaffold_1_mRNA_1204.1           | -                           | -                               |
| GF0026171 | 1                             | 0                       | 0                           | 0 Hypothetical protein (1)                                           |                                                                                                                                                                                                                                                                                                |                                                                                                                                                                             | scaffold_1_mRNA_1203.1           | -                           | -                               |
| GF0026170 | 1                             | 0                       | 0                           | 0 Chaperone protein dnaJ 11 (1)                                      |                                                                                                                                                                                                                                                                                                | DnaJ domain, conserved site [IPR018253] (1); DnaJ domain [IPR001623] (1)                                                                                                    | scaffold_1_mRNA_1201.1           | -                           | -                               |

| ID        | Num. in <i>C. clementiae</i> | Num. in <i>C. uchiha</i> | Num. in <i>P. trifoliata</i> | Note                                                           | GO                                                                                                                                                                                                                                                                                                                                                                                                                                    | InterPro                                                                                                                                                                                                                                                                                                                            | Members in <i>C. clementiae</i> | Members in <i>C. uchiha</i> | Members in <i>P. trifoliata</i> |
|-----------|------------------------------|--------------------------|------------------------------|----------------------------------------------------------------|---------------------------------------------------------------------------------------------------------------------------------------------------------------------------------------------------------------------------------------------------------------------------------------------------------------------------------------------------------------------------------------------------------------------------------------|-------------------------------------------------------------------------------------------------------------------------------------------------------------------------------------------------------------------------------------------------------------------------------------------------------------------------------------|---------------------------------|-----------------------------|---------------------------------|
| GF0026169 | 1                            | 0                        | 0                            | 0 Cytokinin dehydrogenase 3 (1)                                | flavin adenine dinucleotide binding [GO:0050660 molecular_function] (1); oxidation-reduction process [GO:0055114 biological_process] (1); catalytic activity [GO:0003824 molecular_function] (1); cytokinin dehydrogenase activity [GO:0019139 molecular_function] (1); cytokinin metabolic process [GO:0009690 biological_process] (1); oxidoreductase activity, acting on CH-OH group of donors [GO:0016614 molecular_function] (1) | CO dehydrogenase flavoprotein-like, FAD-binding, subdomain 2 [IPR016169] (1); Vanillyl-alcohol oxidase:Cytokinin dehydrogenase C-terminal domain [IPR016170] (1); FAD-binding, type 2 [IPR016166] (1); Cytokinin dehydrogenase 1, FAD:cytokinin binding domain [IPR015345] (1); FAD-linked oxidase-like, C-terminal [IPR016164] (1) | scaffold_1_mRNA_1196.1          | -                           | -                               |
| GF0026168 | 1                            | 0                        | 0                            | 0 Hypothetical protein (1)                                     | zinc ion binding [GO:0008270 molecular_function] (1); nucleic acid binding [GO:0003676 molecular_function] (1)                                                                                                                                                                                                                                                                                                                        | Zinc finger, CCHC-type [IPR001878] (1)                                                                                                                                                                                                                                                                                              | scaffold_1_mRNA_1195.1          | -                           | -                               |
| GF0026167 | 1                            | 0                        | 0                            | 0 Hypothetical protein (1)                                     |                                                                                                                                                                                                                                                                                                                                                                                                                                       |                                                                                                                                                                                                                                                                                                                                     | scaffold_1_mRNA_1194.1          | -                           | -                               |
| GF0026166 | 1                            | 0                        | 0                            | 0 Hypothetical protein (1)                                     |                                                                                                                                                                                                                                                                                                                                                                                                                                       | Domain of unknown function DUF4216 [IPR025332] (1); Domain of unknown function DUF4218 [IPR025452] (1); Transposon, En/Spm-like [IPR004242] (1)                                                                                                                                                                                     | scaffold_1_mRNA_1193.1          | -                           | -                               |
| GF0026165 | 1                            | 0                        | 0                            | 0 Hypothetical protein (1)                                     |                                                                                                                                                                                                                                                                                                                                                                                                                                       | LOG family [IPR031100] (1)                                                                                                                                                                                                                                                                                                          | scaffold_1_mRNA_1190.1          | -                           | -                               |
| GF0026164 | 1                            | 0                        | 0                            | 0 Hypothetical protein (1)                                     |                                                                                                                                                                                                                                                                                                                                                                                                                                       | Transposon, En/Spm-like [IPR004242] (1)                                                                                                                                                                                                                                                                                             | scaffold_1_mRNA_1189.1          | -                           | -                               |
| GF0026163 | 1                            | 0                        | 0                            | 0 Hypothetical protein (1)                                     | zinc ion binding [GO:0008270 molecular_function] (1); nucleic acid binding [GO:0003676 molecular_function] (1)                                                                                                                                                                                                                                                                                                                        | Zinc knuckle CX2CX4HX4C [IPR025336] (1); Zinc finger, CCHC-type [IPR001878] (1); Endonuclease/exonuclease/phosphatase [IPR005135] (1)                                                                                                                                                                                               | scaffold_1_mRNA_1188.1          | -                           | -                               |
| GF0026162 | 1                            | 0                        | 0                            | 0 Hypothetical protein (1)                                     |                                                                                                                                                                                                                                                                                                                                                                                                                                       |                                                                                                                                                                                                                                                                                                                                     | scaffold_1_mRNA_1176.1          | -                           | -                               |
| GF0026161 | 1                            | 0                        | 0                            | 0 Hypothetical protein (1)                                     |                                                                                                                                                                                                                                                                                                                                                                                                                                       |                                                                                                                                                                                                                                                                                                                                     | scaffold_1_mRNA_1167.1          | -                           | -                               |
| GF0026160 | 1                            | 0                        | 0                            | 0 Hypothetical protein (1)                                     |                                                                                                                                                                                                                                                                                                                                                                                                                                       |                                                                                                                                                                                                                                                                                                                                     | scaffold_1_mRNA_1165.1          | -                           | -                               |
| GF0026159 | 1                            | 0                        | 0                            | 0 Cytokinin riboside 5'-monophosphate phosphoribohydrolase (1) |                                                                                                                                                                                                                                                                                                                                                                                                                                       |                                                                                                                                                                                                                                                                                                                                     | scaffold_1_mRNA_1164.1          | -                           | -                               |
| GF0026158 | 1                            | 0                        | 0                            | 0 Hypothetical protein (1)                                     | protein dimerization activity [GO:0046983 molecular_function] (1); nucleic acid binding [GO:0003676 molecular_function] (1); DNA binding [GO:0003677 molecular_function] (1)                                                                                                                                                                                                                                                          | HAT, C-terminal dimerisation domain [IPR008996] (1); hAT-like transposase, RNase-H fold [IPR025525] (1); Ribonuclease H-like domain [IPR012337] (1)                                                                                                                                                                                 | scaffold_1_mRNA_1153.1          | -                           | -                               |
| GF0026157 | 1                            | 0                        | 0                            | 0 Hypothetical protein (1)                                     |                                                                                                                                                                                                                                                                                                                                                                                                                                       |                                                                                                                                                                                                                                                                                                                                     | scaffold_1_mRNA_1142.1          | -                           | -                               |
| GF0026156 | 1                            | 0                        | 0                            | 0 Hypothetical protein (1)                                     |                                                                                                                                                                                                                                                                                                                                                                                                                                       | Reverse transcriptase, RNA-dependent DNA polymerase [IPR013103] (1)                                                                                                                                                                                                                                                                 | scaffold_1_mRNA_1137.1          | -                           | -                               |
| GF0026155 | 1                            | 0                        | 0                            | 0 Hypothetical protein (1)                                     |                                                                                                                                                                                                                                                                                                                                                                                                                                       |                                                                                                                                                                                                                                                                                                                                     | scaffold_1_mRNA_1134.1          | -                           | -                               |
| GF0026154 | 1                            | 0                        | 0                            | 0 Hypothetical protein (1)                                     |                                                                                                                                                                                                                                                                                                                                                                                                                                       |                                                                                                                                                                                                                                                                                                                                     | scaffold_1_mRNA_1133.1          | -                           | -                               |
| GF0026153 | 1                            | 0                        | 0                            | 0 Cytokinin riboside 5'-monophosphate phosphoribohydrolase (1) |                                                                                                                                                                                                                                                                                                                                                                                                                                       | LOG family [IPR031100] (1)                                                                                                                                                                                                                                                                                                          | scaffold_1_mRNA_1132.1          | -                           | -                               |
| GF0026152 | 1                            | 0                        | 0                            | 0 Mutator-like transposase (1)                                 |                                                                                                                                                                                                                                                                                                                                                                                                                                       | MULE transposase domain [IPR018289] (1); Transposase, MuDR, plant [IPR004332] (1)                                                                                                                                                                                                                                                   | scaffold_1_mRNA_1103.1          | -                           | -                               |
| GF0026151 | 1                            | 0                        | 0                            | 0 Hypothetical protein (1)                                     |                                                                                                                                                                                                                                                                                                                                                                                                                                       |                                                                                                                                                                                                                                                                                                                                     | scaffold_1_mRNA_1101.1          | -                           | -                               |
| GF0026150 | 1                            | 0                        | 0                            | 0 Hypothetical protein (1)                                     | DNA binding [GO:0003677 molecular_function] (1)                                                                                                                                                                                                                                                                                                                                                                                       | hAT-like transposase, RNase-H fold [IPR025525] (1)                                                                                                                                                                                                                                                                                  | scaffold_1_mRNA_1099.1          | -                           | -                               |
| GF0026149 | 1                            | 0                        | 0                            | 0 Hypothetical protein (1)                                     |                                                                                                                                                                                                                                                                                                                                                                                                                                       |                                                                                                                                                                                                                                                                                                                                     | scaffold_1_mRNA_1098.1          | -                           | -                               |
| GF0026148 | 1                            | 0                        | 0                            | 0 Hypothetical protein (1)                                     |                                                                                                                                                                                                                                                                                                                                                                                                                                       |                                                                                                                                                                                                                                                                                                                                     | scaffold_1_mRNA_1093.1          | -                           | -                               |
| GF0026147 | 1                            | 0                        | 0                            | 0 Hypothetical protein (1)                                     |                                                                                                                                                                                                                                                                                                                                                                                                                                       |                                                                                                                                                                                                                                                                                                                                     | scaffold_1_mRNA_1092.1          | -                           | -                               |
| GF0026146 | 1                            | 0                        | 0                            | 0 Hypothetical protein (1)                                     |                                                                                                                                                                                                                                                                                                                                                                                                                                       | Retrotransposon gag domain [IPR005162] (1)                                                                                                                                                                                                                                                                                          | scaffold_1_mRNA_1091.1          | -                           | -                               |
| GF0026145 | 1                            | 0                        | 0                            | 0 Hypothetical protein (1)                                     |                                                                                                                                                                                                                                                                                                                                                                                                                                       |                                                                                                                                                                                                                                                                                                                                     | scaffold_1_mRNA_1086.1          | -                           | -                               |
| GF0026144 | 1                            | 0                        | 0                            | 0 Hypothetical protein (1)                                     |                                                                                                                                                                                                                                                                                                                                                                                                                                       | Retrotransposon gag domain [IPR005162] (1)                                                                                                                                                                                                                                                                                          | scaffold_1_mRNA_1071.1          | -                           | -                               |
| GF0026143 | 1                            | 0                        | 0                            | 0 Cytokinin riboside 5'-monophosphate phosphoribohydrolase (1) |                                                                                                                                                                                                                                                                                                                                                                                                                                       | Cytokinin riboside 5'-monophosphate phosphoribohydrolase LOG [IPR005269] (1); LOG family [IPR031100] (1)                                                                                                                                                                                                                            | scaffold_1_mRNA_1070.1          | -                           | -                               |
| GF0026142 | 1                            | 0                        | 0                            | 0 Hypothetical protein (1)                                     |                                                                                                                                                                                                                                                                                                                                                                                                                                       |                                                                                                                                                                                                                                                                                                                                     | scaffold_1_mRNA_1068.1          | -                           | -                               |
| GF0026141 | 1                            | 0                        | 0                            | 0 Hypothetical protein (1)                                     |                                                                                                                                                                                                                                                                                                                                                                                                                                       |                                                                                                                                                                                                                                                                                                                                     | scaffold_1_mRNA_1052.1          | -                           | -                               |
| GF0026140 | 1                            | 0                        | 0                            | 0 Cytokinin riboside 5'-monophosphate phosphoribohydrolase (1) |                                                                                                                                                                                                                                                                                                                                                                                                                                       | LOG family [IPR031100] (1)                                                                                                                                                                                                                                                                                                          | scaffold_1_mRNA_1049.1          | -                           | -                               |
| GF0026139 | 1                            | 0                        | 0                            | 0 Cytokinin riboside 5'-monophosphate phosphoribohydrolase (1) |                                                                                                                                                                                                                                                                                                                                                                                                                                       | LOG family [IPR031100] (1)                                                                                                                                                                                                                                                                                                          | scaffold_1_mRNA_1035.1          | -                           | -                               |
| GF0026138 | 1                            | 0                        | 0                            | 0 Hypothetical protein (1)                                     |                                                                                                                                                                                                                                                                                                                                                                                                                                       | LOG family [IPR031100] (1)                                                                                                                                                                                                                                                                                                          | scaffold_1_mRNA_1033.1          | -                           | -                               |
| GF0026137 | 1                            | 0                        | 0                            | 0 Hypothetical protein (1)                                     | zinc ion binding [GO:0008270 molecular_function] (1); nucleic acid binding [GO:0003676 molecular_function] (1)                                                                                                                                                                                                                                                                                                                        | Domain of unknown function DUF4283 [IPR025558] (1); Zinc finger, CCHC-type [IPR001878] (1)                                                                                                                                                                                                                                          | scaffold_1_mRNA_1031.1          | -                           | -                               |
| GF0026136 | 1                            | 0                        | 0                            | 0 Hypothetical protein (1)                                     |                                                                                                                                                                                                                                                                                                                                                                                                                                       |                                                                                                                                                                                                                                                                                                                                     | scaffold_1_mRNA_1030.1          | -                           | -                               |
| GF0026135 | 1                            | 0                        | 0                            | 0 Hypothetical protein (1)                                     |                                                                                                                                                                                                                                                                                                                                                                                                                                       |                                                                                                                                                                                                                                                                                                                                     | scaffold_1_mRNA_1026.1          | -                           | -                               |
| GF0026134 | 1                            | 0                        | 0                            | 0 Hypothetical protein (1)                                     | oxidation-reduction process [GO:0055114 biological_process] (1); cytoplasm [GO:0005737 cellular_component] (1); inositol catabolic process [GO:0019310 biological_process] (1); iron ion binding [GO:0005506 molecular_function] (1); inositol oxygenase activity [GO:000113 molecular_function] (1)                                                                                                                                  | Inositol oxygenase [IPR007828] (1)                                                                                                                                                                                                                                                                                                  | scaffold_1_mRNA_1005.1          | -                           | -                               |
